# Supplementary material for: An Epithelial-Mesenchymal Transition (EMT) Preoperative Nomogram for Prediction of Lymph Node Metastasis in Bladder Cancer (BLCA)
Source: Hindawi journal article supplement (doi:10.1155/2020/8833972), 2020-11-03
Supplement: f1 [file 8833972.f1.pdf]

| SYMBOL     | logFC | adj.P.Val | P.Value   |
|------------|-------|-----------|-----------|
| GC         | 2.478 | 6.887E-03 | 1.970E-08 |
| KRT38      | 2.409 | 2.950E-05 | 9.504E-03 |
| TMEM247    | 2.130 | 1.476E-03 | 2.470E-12 |
| CST8       | 2.050 | 4.680E-03 | 2.540E-09 |
| SFTPA1     | 1.969 | 4.320E-05 | 2.196E-04 |
| CHST8      | 1.961 | 2.040E-08 | 1.200E-08 |
| SSX1       | 1.936 | 1.533E-02 | 3.615E-04 |
| ASZ1       | 1.884 | 7.962E-03 | 5.069E-04 |
| SFTA2      | 1.869 | 3.320E-06 | 3.030E-06 |
| SCGB2A2    | 1.844 | 8.365E-03 | 4.110E-05 |
| GPR12      | 1.840 | 2.376E-04 | 1.520E-09 |
| MYPN       | 1.827 | 3.930E-07 | 7.810E-14 |
| SOX1       | 1.798 | 9.058E-02 | 1.010E-08 |
| SOST       | 1.795 | 1.251E-04 | 2.936E-03 |
| PPP1R14D   | 1.789 | 4.810E-08 | 5.320E-15 |
| MUC21      | 1.758 | 1.420E-05 | 1.225E-04 |
| SIGLEC6    | 1.753 | 5.400E-08 | 1.200E-17 |
| TAC3       | 1.729 | 3.843E-04 | 7.073E-04 |
| NOG        | 1.727 | 6.040E-07 | 1.890E-14 |
| KERA       | 1.703 | 2.030E-06 | 1.050E-10 |
| MESP1      | 1.656 | 1.270E-09 | 3.730E-13 |
| PCP4       | 1.650 | 1.219E-04 | 6.230E-08 |
| OR1N2      | 1.649 | 1.554E-01 | 3.680E-10 |
| DLK1       | 1.644 | 2.688E-02 | 4.840E-12 |
| ATP6V0A4   | 1.639 | 2.880E-07 | 1.410E-06 |
| SPINT3     | 1.607 | 6.230E-02 | 2.000E-05 |
| CALCB      | 1.603 | 1.650E-06 | 3.983E-04 |
| MYH2       | 1.599 | 5.560E-05 | 2.920E-10 |
| SHISA9     | 1.595 | 5.848E-04 | 6.290E-07 |
| PSG8       | 1.579 | 9.747E-03 | 1.310E-02 |
| CLDN9      | 1.571 | 8.800E-07 | 4.721E-04 |
| LCE1A      | 1.559 | 1.258E-01 | 3.770E-08 |
| AC018755.2 | 1.557 | 1.159E-01 | 2.881E-02 |
| OR3A2      | 1.537 | 3.340E-02 | 1.491E-03 |
| UGT2A3     | 1.527 | 5.266E-02 | 2.330E-08 |
| SIGLEC5    | 1.508 | 4.580E-05 | 4.670E-07 |
| FXVD4      | 1.500 | 5.058E-04 | 4.920E-09 |
| CLDN3      | 1.487 | 1.710E-05 | 2.050E-07 |
| KRTAP5-2   | 1.482 | 7.945E-02 | 1.050E-06 |
| RARRES1    | 1.451 | 5.040E-07 | 7.660E-12 |
| MAGEB16    | 1.446 | 6.857E-02 | 2.077E-04 |
| ERVV-2     | 1.435 | 1.073E-03 | 1.037E-03 |
| HMX1       | 1.434 | 7.371E-02 | 9.030E-13 |
| ANPEP      | 1.431 | 4.270E-09 | 5.650E-05 |
| MAL        | 1.419 | 8.500E-05 | 1.390E-05 |
| C1orf105   | 1.409 | 4.113E-04 | 1.773E-04 |
| MYBPH      | 1.402 | 4.460E-05 | 2.760E-07 |
| GABBR2     | 1.391 | 4.698E-04 | 1.260E-06 |
| OR8S1      | 1.391 | 1.254E-03 | 1.530E-07 |

|          |       |           |           |
|----------|-------|-----------|-----------|
| CLDN6    | 1.386 | 9.223E-04 | 1.090E-08 |
| SPNS2    | 1.374 | 1.080E-12 | 3.170E-06 |
| SLC39A2  | 1.362 | 7.540E-05 | 1.580E-05 |
| LYZL6    | 1.349 | 5.335E-03 | 8.160E-07 |
| GPX6     | 1.333 | 1.473E-01 | 2.640E-06 |
| SCRG1    | 1.332 | 3.859E-04 | 3.960E-08 |
| PIWIL3   | 1.329 | 2.043E-02 | 2.500E-03 |
| SCGB1D2  | 1.323 | 1.283E-01 | 5.920E-06 |
| REG3A    | 1.315 | 4.107E-01 | 5.570E-05 |
| DCX      | 1.300 | 2.106E-03 | 5.690E-07 |
| TMEM215  | 1.295 | 7.671E-03 | 2.003E-04 |
| FOXI1    | 1.293 | 1.532E-02 | 1.240E-08 |
| MRGPRD   | 1.282 | 1.045E-02 | 1.038E-04 |
| GUCA2A   | 1.275 | 2.139E-02 | 9.020E-07 |
| TMPRSS3  | 1.259 | 5.090E-06 | 1.470E-14 |
| KCNK13   | 1.254 | 2.990E-07 | 2.420E-08 |
| EFEMP1   | 1.245 | 6.120E-06 | 3.670E-05 |
| CGB5     | 1.244 | 9.216E-03 | 1.994E-03 |
| PNMT     | 1.244 | 1.251E-04 | 3.820E-08 |
| PSD2     | 1.243 | 8.290E-05 | 8.440E-06 |
| DES      | 1.238 | 3.638E-03 | 3.340E-05 |
| SEMA3D   | 1.237 | 2.470E-05 | 6.083E-03 |
| MRGPRX1  | 1.228 | 3.770E-01 | 1.260E-05 |
| GPR1     | 1.227 | 4.460E-05 | 2.660E-07 |
| BHLHA9   | 1.223 | 8.943E-02 | 4.230E-08 |
| ACTC1    | 1.220 | 5.419E-03 | 1.342E-03 |
| CRP      | 1.211 | 1.779E-02 | 1.766E-04 |
| MSLNL    | 1.208 | 1.709E-02 | 1.520E-06 |
| TRIML1   | 1.208 | 7.280E-02 | 7.009E-03 |
| PGC      | 1.202 | 5.335E-03 | 1.600E-08 |
| IGFBP1   | 1.198 | 3.391E-04 | 1.373E-02 |
| ETNPPL   | 1.195 | 1.141E-02 | 4.989E-03 |
| WDR87    | 1.194 | 3.613E-03 | 3.640E-05 |
| TM4SF4   | 1.194 | 1.447E-02 | 1.592E-04 |
| STEAP4   | 1.193 | 3.230E-07 | 1.140E-06 |
| C5orf67  | 1.188 | 6.332E-03 | 7.273E-04 |
| CACNG6   | 1.183 | 2.299E-02 | 1.311E-02 |
| KCNG1    | 1.180 | 1.950E-05 | 4.365E-02 |
| KCNF1    | 1.174 | 5.830E-04 | 2.930E-06 |
| AMOT     | 1.159 | 3.960E-06 | 7.170E-07 |
| ZMYND10  | 1.150 | 9.840E-09 | 5.513E-03 |
| MIR4666A | 1.147 | 5.765E-04 | 4.780E-05 |
| ACTG2    | 1.145 | 2.686E-04 | 2.170E-08 |
| SMIM2    | 1.143 | 2.764E-04 | 1.920E-07 |
| SYNM     | 1.140 | 6.120E-05 | 4.286E-02 |
| IZUMO2   | 1.139 | 2.906E-02 | 1.023E-04 |
| HS3ST2   | 1.135 | 3.730E-06 | 3.430E-06 |
| FGF16    | 1.134 | 1.108E-02 | 1.368E-03 |
| RGS9BP   | 1.132 | 1.440E-06 | 2.330E-07 |
| KRT72    | 1.126 | 2.350E-03 | 1.100E-06 |

|          |       |           |           |
|----------|-------|-----------|-----------|
| PHOX2B   | 1.119 | 1.816E-01 | 4.550E-05 |
| ALB      | 1.113 | 3.274E-02 | 9.130E-09 |
| GALNT16  | 1.113 | 9.010E-06 | 9.665E-04 |
| KRT24    | 1.109 | 4.091E-02 | 6.440E-05 |
| SLC2A4   | 1.103 | 2.870E-05 | 1.174E-03 |
| SLC16A12 | 1.102 | 1.226E-04 | 4.290E-06 |
| PHYHIPL  | 1.100 | 3.843E-04 | 5.680E-05 |
| CHRNA1   | 1.099 | 1.510E-05 | 1.462E-03 |
| LECT2    | 1.098 | 2.345E-01 | 1.970E-07 |
| PSG11    | 1.098 | 2.474E-01 | 3.550E-08 |
| SUSD2    | 1.096 | 4.810E-08 | 8.120E-05 |
| NCCRP1   | 1.091 | 8.385E-04 | 5.750E-04 |
| KRTAP3-2 | 1.084 | 7.665E-02 | 3.150E-07 |
| CASQ2    | 1.084 | 7.123E-03 | 1.050E-05 |
| SYT5     | 1.079 | 9.378E-04 | 2.050E-07 |
| MYL2     | 1.075 | 2.058E-02 | 3.515E-02 |
| C2orf40  | 1.075 | 4.680E-03 | 2.117E-04 |
| RBFOX3   | 1.075 | 1.907E-03 | 1.670E-06 |
| C15orf48 | 1.074 | 1.450E-05 | 3.090E-03 |
| RASGEF1C | 1.061 | 2.205E-03 | 8.240E-10 |
| KRT33B   | 1.060 | 5.848E-03 | 1.306E-03 |
| FAT3     | 1.058 | 3.037E-04 | 5.112E-04 |
| GPX5     | 1.053 | 2.419E-01 | 1.673E-01 |
| PRSS27   | 1.052 | 4.000E-07 | 1.379E-01 |
| CPM      | 1.051 | 1.290E-06 | 2.750E-07 |
| RGS7     | 1.051 | 2.750E-02 | 2.512E-02 |
| SLC22A25 | 1.048 | 1.076E-01 | 2.930E-07 |
| ATP1A2   | 1.045 | 1.618E-03 | 8.260E-02 |
| EFHD1    | 1.041 | 1.510E-05 | 2.081E-02 |
| GALR2    | 1.037 | 1.172E-04 | 2.050E-05 |
| ZIM2     | 1.035 | 4.395E-02 | 1.638E-02 |
| MGAM     | 1.034 | 4.530E-04 | 1.077E-04 |
| SYCN     | 1.034 | 9.485E-02 | 1.133E-04 |
| TMEM151A | 1.034 | 1.367E-03 | 1.090E-04 |
| PRB2     | 1.032 | 4.662E-02 | 1.095E-02 |
| MYT1L    | 1.030 | 3.714E-02 | 2.770E-05 |
| SULT2A1  | 1.024 | 7.382E-02 | 1.823E-04 |
| CIDEA    | 1.021 | 4.921E-03 | 8.630E-06 |
| CLIC3    | 1.018 | 4.341E-04 | 3.154E-02 |
| ITLN1    | 1.017 | 4.928E-02 | 1.230E-06 |
| PSG5     | 1.016 | 4.133E-02 | 1.660E-03 |
| KRT23    | 1.014 | 4.421E-03 | 8.521E-03 |
| CST6     | 1.009 | 5.111E-04 | 7.243E-02 |
| STS      | 1.008 | 2.870E-08 | 5.497E-03 |
| HGF      | 1.004 | 7.320E-05 | 5.543E-04 |
| GDPD3    | 0.996 | 3.020E-05 | 1.380E-05 |
| ENPP1    | 0.995 | 2.530E-05 | 3.200E-07 |
| SLC9A4   | 0.995 | 1.138E-02 | 7.660E-05 |
| CPNE4    | 0.991 | 5.519E-03 | 3.000E-01 |
| MUC16    | 0.989 | 4.068E-02 | 1.780E-02 |

|         |       |           |           |
|---------|-------|-----------|-----------|
| PSG4    | 0.988 | 6.380E-02 | 2.685E-03 |
| CST2    | 0.988 | 2.943E-03 | 8.970E-05 |
| CEACAM7 | 0.987 | 5.160E-02 | 5.160E-08 |
| PCSK2   | 0.985 | 3.715E-02 | 1.070E-05 |
| SLC2A14 | 0.985 | 7.034E-03 | 1.522E-04 |
| SSX3    | 0.984 | 4.435E-01 | 3.190E-05 |
| KRT4    | 0.984 | 4.560E-02 | 1.855E-03 |
| MUC1    | 0.978 | 5.740E-05 | 1.392E-04 |
| LHFPL4  | 0.975 | 3.375E-02 | 1.560E-05 |
| ARX     | 0.973 | 3.259E-02 | 1.650E-06 |
| TEX101  | 0.969 | 1.286E-02 | 2.506E-02 |
| LIPH    | 0.964 | 9.620E-05 | 4.430E-05 |
| XCR1    | 0.963 | 1.293E-03 | 2.243E-04 |
| HYAL1   | 0.963 | 8.100E-06 | 2.060E-09 |
| GABRR3  | 0.959 | 4.417E-02 | 3.320E-05 |
| MUC15   | 0.959 | 7.123E-03 | 1.317E-03 |
| SLC1A6  | 0.958 | 5.550E-02 | 1.665E-01 |
| FTHL17  | 0.957 | 4.752E-01 | 2.472E-02 |
| THSD7A  | 0.956 | 1.890E-05 | 6.218E-02 |
| ACKR2   | 0.956 | 2.931E-03 | 5.340E-09 |
| TRPC5   | 0.955 | 4.151E-02 | 1.520E-05 |
| HRASLS5 | 0.955 | 1.184E-02 | 1.150E-06 |
| C7orf57 | 0.954 | 8.500E-05 | 2.194E-04 |
| ITGA11  | 0.953 | 8.200E-05 | 8.322E-03 |
| KRT77   | 0.953 | 4.040E-02 | 9.580E-05 |
| SHCBP1L | 0.951 | 7.379E-02 | 6.050E-07 |
| CYP26A1 | 0.950 | 6.419E-03 | 2.805E-03 |
| PATE4   | 0.948 | 3.267E-02 | 1.140E-03 |
| SPINK8  | 0.943 | 9.663E-02 | 1.210E-04 |
| BEAN1   | 0.934 | 1.207E-04 | 5.766E-02 |
| COMP    | 0.933 | 9.633E-03 | 7.060E-05 |
| TACR2   | 0.932 | 3.492E-04 | 1.113E-04 |
| NPTX1   | 0.931 | 1.083E-03 | 2.991E-02 |
| GAS6    | 0.930 | 3.320E-06 | 5.528E-04 |
| VEPH1   | 0.929 | 6.574E-04 | 1.198E-02 |
| FGF18   | 0.928 | 3.920E-05 | 1.050E-01 |
| SPP1    | 0.927 | 6.793E-04 | 3.479E-04 |
| GPR37L1 | 0.927 | 5.110E-06 | 9.325E-02 |
| PROK1   | 0.926 | 2.266E-02 | 1.890E-06 |
| MUC22   | 0.926 | 5.494E-02 | 3.577E-03 |
| WFDC6   | 0.925 | 2.291E-01 | 2.334E-03 |
| KISS1   | 0.924 | 2.284E-03 | 2.129E-01 |
| SORBS2  | 0.921 | 1.860E-05 | 2.040E-09 |
| PGLYRP4 | 0.916 | 1.743E-02 | 5.460E-06 |
| TMEM88B | 0.914 | 1.392E-02 | 1.317E-02 |
| GCKR    | 0.914 | 4.281E-03 | 2.070E-05 |
| KPNA7   | 0.913 | 1.251E-04 | 5.190E-05 |
| GALNT5  | 0.913 | 4.983E-04 | 2.680E-02 |
| AARD    | 0.907 | 1.172E-02 | 2.087E-04 |
| CNTFR   | 0.906 | 2.871E-02 | 4.258E-03 |

|            |       |           |           |
|------------|-------|-----------|-----------|
| ASS1       | 0.904 | 8.500E-05 | 1.254E-01 |
| SULT1E1    | 0.904 | 5.610E-02 | 2.997E-01 |
| FGF22      | 0.901 | 1.251E-04 | 2.268E-03 |
| GSTM1      | 0.901 | 9.628E-02 | 1.256E-03 |
| GABRA5     | 0.897 | 1.310E-01 | 1.290E-05 |
| GJB1       | 0.895 | 4.994E-02 | 1.823E-01 |
| TPO        | 0.888 | 2.583E-02 | 7.320E-05 |
| PRR15L     | 0.887 | 1.665E-03 | 9.060E-04 |
| FOXR1      | 0.885 | 3.244E-02 | 1.001E-02 |
| MS4A15     | 0.884 | 4.994E-02 | 1.668E-02 |
| KRT79      | 0.882 | 3.460E-02 | 7.824E-02 |
| SSX4B      | 0.879 | NA        | 6.650E-05 |
| SLC10A1    | 0.877 | 2.363E-02 | 4.625E-04 |
| SEL1L2     | 0.875 | 1.471E-02 | 2.398E-02 |
| TPPP2      | 0.873 | 2.595E-02 | 6.080E-03 |
| HBE1       | 0.870 | 1.239E-01 | 5.780E-05 |
| SNAP91     | 0.864 | 2.703E-02 | 2.920E-05 |
| MIR4728    | 0.862 | 5.335E-03 | 1.940E-05 |
| AL035460.1 | 0.860 | 2.147E-01 | 3.260E-07 |
| HSPB6      | 0.859 | 1.129E-02 | 1.493E-03 |
| ALK        | 0.858 | 1.644E-03 | 1.078E-01 |
| FGF10      | 0.856 | 2.391E-02 | 2.628E-01 |
| AKR1B15    | 0.855 | 1.797E-02 | 2.179E-03 |
| COL4A3     | 0.852 | 3.614E-03 | 7.170E-04 |
| PROM1      | 0.852 | 3.623E-02 | 6.004E-03 |
| PAGE5      | 0.851 | 1.396E-02 | 8.710E-06 |
| LCE2C      | 0.850 | 5.309E-01 | 5.952E-03 |
| C10orf67   | 0.849 | 1.497E-02 | 5.563E-03 |
| MGP        | 0.849 | 1.212E-03 | 5.334E-02 |
| FAM180A    | 0.849 | 4.121E-03 | 4.790E-05 |
| IL34       | 0.848 | 1.670E-05 | 9.166E-02 |
| MSLN       | 0.846 | 4.923E-02 | 2.821E-03 |
| TH         | 0.846 | 3.937E-02 | 8.190E-07 |
| SPNS3      | 0.846 | 1.122E-04 | 1.556E-02 |
| LCN8       | 0.846 | 1.291E-01 | 5.092E-02 |
| KCNK15     | 0.845 | 1.748E-03 | 1.432E-04 |
| FGF1       | 0.844 | 2.370E-05 | 3.760E-07 |
| GRIFIN     | 0.843 | 7.785E-02 | 3.642E-04 |
| CACNG4     | 0.843 | 2.595E-02 | 6.050E-08 |
| C4BPB      | 0.842 | 3.030E-02 | 4.530E-02 |
| PCDHA12    | 0.842 | 1.233E-01 | 3.144E-01 |
| ERBB2      | 0.840 | 8.150E-06 | 6.030E-04 |
| PPP1R1B    | 0.836 | NA        | 2.081E-04 |
| HPSE2      | 0.836 | 3.243E-02 | 3.090E-07 |
| HSPB7      | 0.834 | 1.342E-02 | 1.093E-04 |
| GRID1      | 0.832 | 1.557E-04 | 3.450E-05 |
| THBS4      | 0.832 | 5.740E-03 | 3.350E-06 |
| ATP2B3     | 0.830 | 1.634E-02 | 5.070E-08 |
| TMEM130    | 0.829 | 1.839E-03 | 2.317E-01 |
| CNTNAP3B   | 0.829 | 6.801E-03 | 9.158E-04 |

|          |       |           |           |
|----------|-------|-----------|-----------|
| FLNC     | 0.826 | 1.009E-02 | 1.440E-04 |
| IL17C    | 0.825 | 4.451E-02 | 2.480E-06 |
| CHRD12   | 0.825 | 3.085E-02 | 6.420E-06 |
| MESP2    | 0.824 | 7.247E-03 | 1.770E-07 |
| PIANP    | 0.824 | 3.843E-04 | 3.458E-01 |
| CYP2B6   | 0.821 | 1.351E-01 | 2.196E-03 |
| CNN1     | 0.820 | 1.911E-02 | 2.026E-04 |
| SLC30A2  | 0.820 | 3.818E-02 | 2.230E-03 |
| UPK3A    | 0.819 | 6.530E-02 | 5.790E-06 |
| C5orf38  | 0.819 | 1.497E-01 | 9.940E-06 |
| ST6GAL2  | 0.818 | 6.843E-03 | 3.609E-02 |
| SPATA3   | 0.818 | 3.735E-01 | 4.000E-06 |
| CHRM2    | 0.817 | 8.185E-02 | 4.559E-04 |
| GABRB1   | 0.814 | 1.658E-01 | 1.180E-05 |
| EPYC     | 0.813 | 1.032E-01 | 1.752E-04 |
| A2ML1    | 0.812 | 2.354E-02 | 4.611E-02 |
| SLC19A3  | 0.811 | 4.225E-03 | 9.680E-05 |
| DMRT3    | 0.809 | 3.800E-02 | 1.090E-06 |
| KCNK3    | 0.809 | 7.868E-03 | 6.910E-05 |
| CEACAM6  | 0.807 | 5.670E-02 | 1.642E-01 |
| PROKR2   | 0.807 | 3.340E-01 | 1.084E-03 |
| UNC5C    | 0.807 | 1.251E-04 | 8.730E-05 |
| PTN      | 0.805 | 2.623E-02 | 4.301E-01 |
| HSD3B1   | 0.805 | 1.833E-01 | 8.280E-06 |
| MIR4257  | 0.804 | 1.179E-02 | 1.023E-01 |
| MTRNR2L1 | 0.802 | 1.462E-01 | 3.989E-03 |
| SCIN     | 0.802 | 2.603E-03 | 4.071E-02 |
| C15orf62 | 0.796 | 1.220E-05 | 1.042E-02 |
| C1QL2    | 0.794 | 1.844E-01 | 3.808E-03 |
| NCAM1    | 0.793 | 1.985E-02 | 2.290E-03 |
| DAB2     | 0.793 | 7.900E-06 | 2.480E-02 |
| RTL3     | 0.793 | 2.434E-02 | 1.146E-01 |
| MYOZ2    | 0.789 | 1.252E-02 | 7.820E-05 |
| WISP2    | 0.789 | 2.361E-02 | 3.352E-03 |
| DEFB119  | 0.789 | 5.243E-01 | 3.143E-03 |
| PGLYRP2  | 0.787 | 1.572E-02 | 3.916E-04 |
| CBLN2    | 0.787 | 6.251E-02 | 3.829E-02 |
| ANTXRL   | 0.786 | 3.573E-02 | 1.386E-04 |
| ADRB3    | 0.785 | 4.479E-02 | 8.835E-04 |
| CYP4F8   | 0.783 | 1.435E-01 | 1.654E-02 |
| RGS4     | 0.782 | 2.931E-03 | 2.010E-07 |
| CAPSL    | 0.782 | 9.131E-02 | 8.278E-03 |
| C7       | 0.780 | 5.732E-02 | 1.801E-03 |
| CALB2    | 0.779 | 2.829E-02 | 7.073E-03 |
| OGN      | 0.779 | 6.634E-02 | 6.621E-02 |
| JPH3     | 0.777 | 2.492E-02 | 1.374E-04 |
| LRRC26   | 0.771 | 2.904E-02 | 7.444E-04 |
| MAGEB1   | 0.770 | 6.329E-01 | 3.540E-05 |
| BLID     | 0.770 | NA        | 1.273E-03 |
| GPR88    | 0.770 | 1.545E-02 | 3.548E-04 |

|            |       |           |           |
|------------|-------|-----------|-----------|
| GABRA3     | 0.768 | 1.173E-02 | 1.307E-02 |
| REEP6      | 0.767 | 1.770E-03 | 1.170E-07 |
| NDST3      | 0.767 | 2.174E-02 | 1.392E-02 |
| BARX1      | 0.767 | 6.613E-02 | 2.428E-04 |
| GPHA2      | 0.766 | 9.333E-02 | 2.049E-03 |
| KCNJ18     | 0.766 | 2.551E-01 | 8.810E-05 |
| SCT        | 0.765 | 1.260E-02 | 8.879E-03 |
| OLFML3     | 0.762 | 1.942E-03 | 1.290E-05 |
| HYPM       | 0.762 | 4.201E-01 | 9.120E-07 |
| REEP1      | 0.760 | 9.308E-03 | 9.781E-03 |
| NTRK3      | 0.760 | 1.074E-02 | 1.010E-01 |
| SLC46A2    | 0.759 | 1.887E-02 | 3.870E-06 |
| TINCR      | 0.759 | 1.118E-03 | 1.264E-02 |
| CSDC2      | 0.755 | 1.339E-02 | 3.624E-04 |
| SAA2-SAA4  | 0.755 | 1.524E-01 | 5.463E-04 |
| OR7C1      | 0.755 | 1.173E-01 | 3.144E-02 |
| SYNPO2     | 0.755 | 1.254E-02 | 2.047E-02 |
| LOR        | 0.754 | 1.576E-01 | 3.061E-03 |
| PDK4       | 0.754 | 2.078E-03 | 8.430E-06 |
| ITGBL1     | 0.752 | 4.494E-03 | 1.917E-04 |
| LIPN       | 0.751 | 4.852E-02 | 1.645E-04 |
| MAN1C1     | 0.751 | 1.492E-02 | 5.120E-03 |
| PTX3       | 0.751 | 1.953E-02 | 2.459E-02 |
| FAM19A4    | 0.751 | 1.560E-01 | 1.660E-06 |
| AKR1B1     | 0.750 | 6.230E-05 | 5.030E-06 |
| ERVFRD-1   | 0.750 | 2.437E-02 | 8.054E-03 |
| MORN5      | 0.747 | 9.369E-02 | 1.900E-05 |
| TRDN       | 0.747 | 2.041E-01 | 2.669E-01 |
| STXBP6     | 0.747 | 1.985E-02 | 1.054E-02 |
| CASP14     | 0.745 | 1.489E-01 | 1.169E-02 |
| C5orf46    | 0.745 | 4.588E-02 | 3.499E-03 |
| KRTAP17-1  | 0.745 | 1.786E-01 | 1.380E-05 |
| PATE2      | 0.745 | 1.445E-01 | 7.926E-03 |
| C2CD4B     | 0.743 | 2.901E-03 | 6.205E-04 |
| KIAA1257   | 0.742 | 9.865E-04 | 3.805E-03 |
| STOML3     | 0.741 | 7.080E-02 | 6.200E-06 |
| CFAP77     | 0.740 | 5.875E-02 | 6.250E-05 |
| NUPR1      | 0.740 | 1.805E-03 | 1.567E-02 |
| DKK2       | 0.739 | 4.578E-03 | 2.253E-02 |
| LEFTY2     | 0.739 | 1.196E-01 | 4.473E-02 |
| AC008982.1 | 0.739 | 1.193E-02 | 6.287E-02 |
| FABP3      | 0.738 | 1.401E-03 | 1.950E-05 |
| SLC5A11    | 0.738 | 2.448E-03 | 3.604E-04 |
| MFAP5      | 0.738 | 5.095E-02 | 1.082E-04 |
| AMER2      | 0.737 | 1.702E-01 | 1.082E-04 |
| MARCO      | 0.737 | 3.948E-02 | 9.925E-03 |
| LCE2D      | 0.736 | 6.454E-01 | 1.950E-05 |
| ARMC4      | 0.735 | 2.433E-02 | 2.180E-07 |
| ADAMTS8    | 0.735 | 8.746E-03 | 3.341E-02 |
| FBXL16     | 0.734 | 5.935E-03 | 1.509E-03 |

|          |       |           |           |
|----------|-------|-----------|-----------|
| ADAM29   | 0.733 | 1.316E-01 | 2.109E-04 |
| PRRG3    | 0.733 | 8.198E-03 | 1.217E-01 |
| PIWIL2   | 0.732 | 2.862E-02 | 4.470E-05 |
| TAGLN    | 0.731 | 4.103E-03 | 3.330E-05 |
| HSD17B1  | 0.730 | 6.490E-05 | 3.033E-04 |
| TNXB     | 0.730 | 4.762E-03 | 9.350E-05 |
| C4A      | 0.730 | 7.658E-03 | 1.654E-01 |
| CCR3     | 0.729 | 4.318E-03 | 6.157E-04 |
| HSPB8    | 0.728 | 5.665E-03 | 4.965E-01 |
| GATA5    | 0.728 | 9.781E-02 | 5.911E-02 |
| SERPINB7 | 0.728 | 1.410E-01 | 1.191E-01 |
| EMX1     | 0.727 | 5.580E-02 | 8.648E-03 |
| OPTC     | 0.723 | 9.644E-02 | 9.474E-04 |
| GRM6     | 0.722 | 3.638E-02 | 1.322E-02 |
| CD164L2  | 0.719 | 3.472E-03 | 1.377E-02 |
| HIST2H4B | 0.718 | 2.097E-01 | 6.790E-06 |
| KCNG3    | 0.718 | 6.259E-02 | 1.681E-01 |
| CLIC5    | 0.718 | 5.848E-03 | 8.162E-02 |
| DRGX     | 0.714 | 2.206E-01 | 6.346E-03 |
| NTNG1    | 0.714 | 6.067E-02 | 3.250E-06 |
| PTGIS    | 0.713 | 3.595E-02 | 3.517E-03 |
| GRAMD2   | 0.712 | 1.942E-02 | 5.551E-04 |
| ST8SIA3  | 0.712 | 2.348E-01 | 1.360E-01 |
| TDRD1    | 0.710 | 7.499E-02 | 1.697E-02 |
| ELN      | 0.710 | 6.668E-03 | 2.911E-04 |
| PLA2G5   | 0.707 | 1.092E-02 | 7.043E-03 |
| SGCA     | 0.706 | 2.944E-02 | 7.720E-05 |
| TMEM78   | 0.706 | 1.132E-01 | 9.980E-06 |
| OR7A5    | 0.705 | 7.797E-02 | 1.560E-05 |
| VSTM2L   | 0.705 | 4.852E-02 | 2.323E-04 |
| MYH11    | 0.705 | 7.102E-02 | 6.410E-06 |
| PTCHD1   | 0.704 | 9.503E-02 | 2.830E-07 |
| GALP     | 0.703 | 4.252E-01 | 4.160E-07 |
| EPHA3    | 0.703 | 1.271E-03 | 1.126E-02 |
| NDRG2    | 0.702 | 2.712E-04 | 1.150E-06 |
| CDHR4    | 0.702 | 3.519E-03 | 1.020E-01 |
| ROPN1L   | 0.701 | 2.166E-03 | 1.512E-01 |
| MT1M     | 0.701 | 3.460E-02 | 7.198E-04 |
| PYGM     | 0.699 | 5.211E-03 | 2.046E-02 |
| COL8A1   | 0.699 | 2.461E-03 | 5.860E-06 |
| TRIM63   | 0.698 | 5.801E-02 | 2.518E-02 |
| POTEH    | 0.698 | 3.558E-01 | 9.814E-02 |
| KLF17    | 0.698 | 1.026E-01 | 1.400E-05 |
| OR3A1    | 0.697 | NA        | 8.045E-02 |
| ASB5     | 0.695 | 2.526E-01 | 7.304E-04 |
| P2RY6    | 0.695 | 4.243E-03 | 1.170E-06 |
| BHMT     | 0.695 | 1.852E-01 | 1.595E-03 |
| TPM2     | 0.694 | 1.910E-03 | 8.185E-02 |
| HIST1H1T | 0.692 | 6.634E-02 | 4.661E-04 |
| DMKN     | 0.691 | 1.573E-02 | 2.200E-05 |



|          |       |           |           |
|----------|-------|-----------|-----------|
| ATP13A4  | 0.690 | 3.318E-02 | 1.140E-02 |
| LMOD1    | 0.690 | 2.938E-02 | 8.426E-03 |
| ADCYAP1  | 0.689 | 3.150E-02 | 3.161E-03 |
| WBSR17   | 0.689 | 2.646E-02 | 1.659E-02 |
| CNDP1    | 0.688 | 1.256E-02 | 2.021E-01 |
| ISLR     | 0.686 | 1.927E-02 | 5.985E-02 |
| ATP6V1G3 | 0.686 | 4.053E-01 | 2.459E-04 |
| VSIG10L  | 0.685 | 4.221E-03 | 2.924E-02 |
| TAS1R3   | 0.685 | 3.615E-03 | 2.110E-06 |
| CGB8     | 0.684 | 2.338E-01 | 2.364E-01 |
| COL10A1  | 0.683 | 7.146E-02 | 6.664E-04 |
| SNTG2    | 0.682 | 2.903E-02 | 6.980E-06 |
| RASGRF1  | 0.682 | 9.308E-03 | 3.730E-01 |
| INA      | 0.681 | 6.194E-02 | 1.068E-01 |
| CFAP47   | 0.681 | 8.830E-02 | 4.487E-02 |
| PLIN1    | 0.680 | 3.773E-02 | 6.070E-04 |
| ZDHHC15  | 0.680 | 1.911E-02 | 2.493E-04 |
| COBL     | 0.680 | 6.781E-02 | 1.111E-02 |
| FBXO15   | 0.679 | 6.574E-04 | 3.302E-04 |
| WFDC10B  | 0.678 | 4.431E-02 | 8.270E-13 |
| LCN6     | 0.677 | 7.118E-02 | 2.492E-04 |
| SLC28A3  | 0.676 | 4.575E-02 | 1.500E-05 |
| FAM189A1 | 0.676 | 7.872E-02 | 1.570E-01 |
| ADAMTSL4 | 0.674 | 8.705E-03 | 5.073E-03 |
| MFAP4    | 0.674 | 1.066E-02 | 1.070E-05 |
| LMO1     | 0.673 | 1.599E-01 | 5.267E-02 |
| ASPRV1   | 0.673 | 2.263E-03 | 3.123E-04 |
| LRP2     | 0.673 | 4.427E-02 | 1.938E-03 |
| NXPE1    | 0.672 | 1.562E-01 | 2.289E-01 |
| SLCO4C1  | 0.672 | 7.483E-02 | 1.198E-04 |
| AMH      | 0.672 | 2.014E-02 | 6.330E-03 |
| C10orf10 | 0.671 | 4.113E-04 | 7.570E-05 |
| IL17F    | 0.670 | 3.045E-01 | 2.030E-05 |
| CSF2     | 0.670 | 5.835E-02 | 4.523E-02 |
| MYL1     | 0.669 | NA        | 2.670E-02 |
| CCL11    | 0.669 | 2.413E-02 | 2.949E-01 |
| SGCD     | 0.668 | 1.778E-02 | 3.771E-02 |
| CFAP45   | 0.668 | 2.235E-03 | 5.590E-05 |
| CYS1     | 0.667 | 5.710E-03 | 3.894E-02 |
| SMOC2    | 0.667 | 1.057E-02 | 4.560E-05 |
| NRK      | 0.667 | 2.783E-02 | 4.100E-04 |
| APOBEC4  | 0.665 | 1.495E-01 | 2.266E-03 |
| PSD      | 0.665 | 6.843E-03 | 9.680E-05 |
| ANKRD35  | 0.664 | 1.618E-03 | 3.592E-04 |
| WNT9B    | 0.664 | 4.395E-02 | 2.228E-04 |
| SCGB2A1  | 0.662 | 2.107E-01 | 8.785E-02 |
| PEG3     | 0.662 | 3.149E-02 | 2.320E-02 |
| STUM     | 0.662 | 6.453E-02 | 1.050E-05 |
| IL11     | 0.661 | 1.102E-02 | 4.647E-02 |
| PSORS1C2 | 0.661 | 1.555E-01 | 3.294E-02 |

|          |       |           |           |
|----------|-------|-----------|-----------|
| SPRR3    | 0.659 | 9.247E-02 | 1.159E-02 |
| DAND5    | 0.659 | 8.128E-03 | 6.987E-03 |
| PRLR     | 0.659 | 6.012E-02 | 2.685E-03 |
| NCBP2L   | 0.658 | 3.389E-01 | 2.507E-03 |
| RGS16    | 0.657 | 3.822E-04 | 1.889E-02 |
| OLIG3    | 0.657 | 5.978E-01 | 2.333E-02 |
| SERPIN2  | 0.653 | 1.816E-01 | 2.461E-02 |
| PADI6    | 0.651 | 1.326E-01 | 3.173E-03 |
| GNA14    | 0.651 | 8.073E-03 | 7.794E-04 |
| JSRP1    | 0.650 | 2.001E-02 | 2.444E-02 |
| SOWAHA   | 0.650 | 1.503E-02 | 2.330E-05 |
| GRPR     | 0.649 | 1.705E-02 | 5.870E-03 |
| SFTPA2   | 0.649 | 1.912E-01 | 7.480E-07 |
| MYL9     | 0.649 | 8.087E-03 | 9.638E-04 |
| CRABP2   | 0.648 | 1.024E-02 | 7.432E-02 |
| IGFL1    | 0.648 | 1.936E-01 | 1.068E-02 |
| RBP7     | 0.648 | 2.021E-03 | 3.572E-04 |
| INSC     | 0.648 | 4.702E-02 | 6.090E-02 |
| MEIKIN   | 0.647 | 1.746E-01 | 7.940E-04 |
| FOXG1    | 0.647 | 3.973E-01 | 4.497E-04 |
| WNT7A    | 0.646 | 1.100E-01 | 1.296E-03 |
| OCSTAMP  | 0.645 | 1.627E-01 | 8.290E-05 |
| PGM5     | 0.643 | 7.338E-02 | 2.725E-02 |
| TMPRSS12 | 0.643 | 4.079E-03 | 1.089E-02 |
| GFY      | 0.642 | 1.461E-01 | 4.966E-02 |
| UPK3B    | 0.642 | 4.418E-02 | 1.151E-01 |
| MLN      | 0.641 | 2.131E-01 | 9.278E-02 |
| BPGM     | 0.641 | 4.699E-04 | 4.084E-02 |
| SCEL     | 0.641 | 1.368E-01 | 1.683E-04 |
| KRT40    | 0.641 | 1.190E-01 | 1.060E-03 |
| ZBTB16   | 0.639 | 3.966E-02 | 7.460E-05 |
| HCRTR1   | 0.638 | 3.691E-03 | 1.322E-02 |
| VCX2     | 0.638 | 3.154E-01 | 7.000E-05 |
| PODN     | 0.635 | 9.376E-03 | 1.230E-04 |
| SYPL2    | 0.635 | 3.867E-03 | 5.533E-02 |
| RLN3     | 0.635 | 4.120E-01 | 1.810E-05 |
| ERP27    | 0.634 | 2.391E-02 | 2.090E-07 |
| PCDHA11  | 0.634 | 2.356E-01 | 5.446E-02 |
| SLC2A2   | 0.633 | 3.388E-01 | 6.503E-03 |
| TTC9     | 0.632 | 2.764E-04 | 1.322E-01 |
| MXRA8    | 0.632 | 4.225E-03 | 3.515E-03 |
| TMEM210  | 0.632 | 2.026E-01 | 7.450E-07 |
| PEX5L    | 0.631 | 5.001E-02 | 1.738E-03 |
| MKX      | 0.630 | 5.099E-02 | 9.279E-02 |
| PLN      | 0.630 | 8.286E-02 | 9.700E-05 |
| MAP7D2   | 0.629 | 6.763E-02 | 2.317E-03 |
| MB       | 0.629 | 8.925E-02 | 9.320E-05 |
| PIP5K1B  | 0.629 | 1.710E-02 | 2.086E-02 |
| KRT80    | 0.628 | 9.396E-03 | 2.690E-05 |
| RYR1     | 0.628 | 3.537E-02 | 7.441E-04 |

|            |       |           |           |
|------------|-------|-----------|-----------|
| C1QTNF7    | 0.628 | 1.076E-02 | 6.776E-02 |
| C1orf194   | 0.626 | 4.625E-02 | 5.242E-03 |
| GPLD1      | 0.626 | 1.285E-02 | 1.133E-01 |
| DCLK2      | 0.626 | 1.442E-03 | 1.370E-01 |
| KLHL38     | 0.625 | 3.887E-02 | 7.160E-05 |
| DRC1       | 0.624 | 2.696E-02 | 1.631E-03 |
| ELOA2      | 0.624 | 1.233E-01 | 1.338E-02 |
| ZNF729     | 0.623 | 4.891E-01 | 9.561E-03 |
| ARHGAP40   | 0.623 | 2.117E-02 | 6.386E-03 |
| SPACA3     | 0.623 | 2.043E-01 | 4.287E-02 |
| TRIL       | 0.623 | 8.136E-04 | 5.260E-05 |
| C5orf49    | 0.622 | 2.394E-02 | 3.462E-03 |
| ADGRE1     | 0.622 | 5.489E-02 | 1.422E-04 |
| FREM2      | 0.622 | 2.029E-01 | 1.649E-02 |
| PCDHA5     | 0.620 | 1.489E-01 | 8.881E-03 |
| CLPSL2     | 0.620 | 1.369E-01 | 1.247E-02 |
| ACTA1      | 0.620 | 1.073E-03 | 3.980E-02 |
| LINC00890  | 0.620 | 2.149E-01 | 2.982E-02 |
| OXTR       | 0.620 | 4.964E-03 | 6.394E-02 |
| CRYAB      | 0.619 | 1.324E-02 | 4.405E-03 |
| INHA       | 0.619 | 1.670E-02 | 8.965E-02 |
| VIPR2      | 0.618 | 3.806E-02 | 6.472E-02 |
| RPRML      | 0.618 | 1.799E-01 | 5.120E-05 |
| CACNA1B    | 0.618 | 1.672E-01 | 9.137E-04 |
| RSP01      | 0.618 | 5.594E-02 | 6.639E-03 |
| C1QL1      | 0.618 | 4.869E-02 | 4.163E-02 |
| ANXA9      | 0.618 | 9.723E-03 | 6.903E-01 |
| DACT3      | 0.617 | 1.396E-02 | 6.840E-06 |
| PNLDC1     | 0.614 | 7.144E-02 | 1.335E-03 |
| KNDC1      | 0.613 | 3.578E-02 | 1.977E-04 |
| CBLN4      | 0.612 | 1.448E-01 | 2.240E-02 |
| C6         | 0.612 | 1.748E-01 | 1.010E-01 |
| PPY        | 0.611 | 1.686E-01 | 1.423E-03 |
| AC093155.3 | 0.611 | 3.119E-02 | 2.846E-04 |
| PLEKHG4B   | 0.611 | 1.283E-01 | 7.103E-04 |
| RANBP3L    | 0.610 | 6.956E-02 | 5.936E-03 |
| C11orf97   | 0.610 | NA        | 6.284E-02 |
| ACER1      | 0.609 | 1.029E-01 | 1.098E-04 |
| SLC2A3     | 0.609 | 4.811E-03 | 3.544E-01 |
| TEX44      | 0.609 | NA        | 1.745E-04 |
| NETO1      | 0.609 | 1.381E-01 | 2.700E-02 |
| VASN       | 0.607 | 4.965E-04 | 8.640E-05 |
| HIST1H4H   | 0.607 | 1.619E-02 | 8.984E-02 |
| TCEAL2     | 0.607 | 1.421E-01 | 3.407E-02 |
| C16orf90   | 0.607 | 1.665E-01 | 7.776E-02 |
| ACKR1      | 0.607 | 7.581E-02 | 5.612E-02 |
| ASPG       | 0.606 | 7.146E-02 | 9.973E-04 |
| ADTRP      | 0.605 | 3.499E-02 | 3.125E-02 |
| CST11      | 0.604 | 1.349E-01 | 4.552E-02 |
| KCNB1      | 0.603 | 1.003E-01 | 1.355E-03 |

|            |       |           |           |
|------------|-------|-----------|-----------|
| HOPX       | 0.603 | 1.001E-02 | 1.057E-02 |
| OTOS       | 0.603 | 3.524E-01 | 1.015E-04 |
| MYLK3      | 0.602 | 2.781E-03 | 3.563E-04 |
| CWH43      | 0.602 | 2.479E-01 | 8.186E-04 |
| FAM131C    | 0.601 | 1.685E-02 | 1.250E-01 |
| ERBB4      | 0.601 | 1.439E-01 | 9.241E-02 |
| AEBP1      | 0.601 | 2.175E-02 | 2.190E-05 |
| OTC        | 0.601 | 4.243E-01 | 1.320E-06 |
| CNGA3      | 0.600 | 5.843E-02 | 1.065E-02 |
| C9orf135   | 0.600 | 2.107E-01 | 1.212E-01 |
| AC091167.7 | 0.600 | 5.610E-02 | 4.404E-04 |
| ABCB5      | 0.600 | 1.540E-01 | 4.401E-04 |
| RUNX2      | 0.600 | 6.574E-04 | 2.506E-01 |
| IL1R1      | 0.600 | 4.460E-05 | 1.785E-02 |
| WFDC10A    | 0.600 | 3.393E-01 | 8.542E-03 |
| NLRP2      | 0.599 | 1.562E-01 | 7.446E-01 |
| CYP11A1    | 0.599 | 1.137E-01 | 8.999E-04 |
| PDX1       | 0.597 | 2.155E-01 | 1.824E-02 |
| UPK1B      | 0.596 | 1.515E-01 | 2.410E-05 |
| PSG9       | 0.596 | 3.044E-01 | 7.002E-04 |
| PGPEP1L    | 0.596 | 5.088E-02 | 6.826E-03 |
| ACTA2      | 0.596 | 1.664E-02 | 1.408E-01 |
| RDH12      | 0.595 | 5.312E-02 | 3.772E-01 |
| RBP2       | 0.595 | 5.256E-02 | 1.506E-01 |
| TGFBR3L    | 0.595 | 2.837E-02 | 1.509E-02 |
| DAW1       | 0.594 | 2.917E-01 | 9.080E-05 |
| TNNI3      | 0.594 | 1.427E-01 | 1.985E-02 |
| MTNR1B     | 0.594 | 3.003E-01 | 1.822E-01 |
| SPATA4     | 0.593 | 5.858E-02 | 3.023E-02 |
| PSG2       | 0.593 | 3.736E-01 | 1.451E-03 |
| MGARP      | 0.592 | 9.460E-03 | 1.116E-03 |
| RBPMS2     | 0.591 | 1.798E-02 | 2.007E-01 |
| VTN        | 0.591 | 5.941E-02 | 2.632E-03 |
| PPFIA2     | 0.590 | 4.256E-02 | 4.677E-01 |
| KCNQ4      | 0.590 | 6.178E-03 | 1.279E-01 |
| RAMP1      | 0.590 | 4.299E-02 | 2.650E-05 |
| DHDH       | 0.590 | 9.308E-03 | 1.464E-02 |
| FXVD6      | 0.588 | 3.244E-02 | 2.425E-01 |
| OR1J2      | 0.586 | 1.705E-01 | 1.057E-01 |
| MGAT4A     | 0.586 | 4.929E-04 | 6.721E-02 |
| ONECUT1    | 0.586 | 2.055E-01 | 2.383E-02 |
| KIAA1462   | 0.585 | 9.098E-04 | 4.240E-02 |
| CYP3A43    | 0.585 | 9.109E-02 | 2.925E-02 |
| C3orf80    | 0.584 | 7.698E-03 | 1.490E-05 |
| AMELY      | 0.584 | 5.543E-01 | 2.555E-02 |
| MYO18B     | 0.584 | 1.295E-01 | 3.204E-01 |
| PTH2       | 0.583 | 4.913E-01 | 1.730E-05 |
| CXCL17     | 0.583 | 9.426E-02 | 6.247E-02 |
| KCNMB1     | 0.583 | 3.296E-02 | 1.579E-02 |
| TNNT1      | 0.583 | 1.013E-01 | 6.878E-02 |

|            |       |           |           |
|------------|-------|-----------|-----------|
| SLC28A1    | 0.582 | 4.442E-02 | 3.951E-04 |
| TNMD       | 0.580 | 2.236E-01 | 4.984E-02 |
| MYL7       | 0.580 | 2.922E-01 | 8.090E-05 |
| GBX2       | 0.580 | 1.100E-01 | 6.552E-02 |
| MYEF2      | 0.580 | 4.027E-02 | 6.250E-05 |
| P2RX1      | 0.579 | 1.076E-01 | 2.007E-02 |
| ARHGAP29   | 0.579 | 2.649E-03 | 9.170E-03 |
| BOC        | 0.579 | 2.354E-02 | 1.232E-03 |
| LRRIQ4     | 0.578 | 4.578E-02 | 1.494E-02 |
| GOLGA6A    | 0.577 | NA        | 7.516E-04 |
| HIST3H2A   | 0.577 | 4.522E-04 | 5.172E-02 |
| SLC6A4     | 0.576 | 7.319E-02 | 4.315E-03 |
| FGF14      | 0.575 | 1.753E-02 | 1.130E-01 |
| KL         | 0.575 | 5.242E-02 | 5.319E-03 |
| TNF        | 0.574 | 4.253E-02 | 5.752E-02 |
| TBR1       | 0.574 | 2.058E-01 | 1.006E-01 |
| TRIM17     | 0.573 | 3.595E-02 | 2.843E-01 |
| TACC1      | 0.573 | 6.481E-04 | 1.620E-05 |
| KRT20      | 0.573 | 2.645E-01 | 6.992E-03 |
| C1QTNF3    | 0.573 | 8.198E-03 | 4.588E-02 |
| RAB11FIP1  | 0.573 | 2.827E-03 | 6.667E-02 |
| SLC9A2     | 0.572 | 8.521E-02 | 3.247E-01 |
| RHO        | 0.571 | 2.357E-01 | 5.138E-03 |
| ABCC12     | 0.571 | 5.102E-01 | 2.335E-01 |
| NON1-GTF2A | 0.571 | 1.009E-01 | 7.566E-02 |
| PTCHD4     | 0.571 | 4.300E-02 | 3.561E-02 |
| SLN        | 0.571 | 1.013E-01 | 1.073E-04 |
| KLHL34     | 0.570 | 2.569E-01 | 1.236E-04 |
| FZD10      | 0.569 | 8.528E-02 | 4.513E-03 |
| ABCA3      | 0.569 | 1.857E-02 | 1.540E-03 |
| FNDC4      | 0.569 | 3.181E-03 | 8.850E-02 |
| PENK       | 0.569 | 1.666E-01 | 3.975E-02 |
| CYP8B1     | 0.568 | 1.485E-01 | 1.460E-03 |
| ST8SIA6    | 0.568 | 5.975E-02 | 2.382E-04 |
| SFRP2      | 0.568 | 1.769E-01 | 2.085E-04 |
| VTCN1      | 0.567 | 1.435E-01 | 2.118E-04 |
| TXNDC8     | 0.567 | 4.932E-01 | 2.298E-04 |
| LKAAEAR1   | 0.566 | 9.645E-02 | 6.660E-07 |
| FAM71F1    | 0.566 | 1.899E-01 | 3.831E-02 |
| GUCA2B     | 0.566 | 4.709E-01 | 1.852E-03 |
| FSTL5      | 0.565 | 3.384E-01 | 2.010E-03 |
| NANOS1     | 0.565 | 8.083E-03 | 2.030E-04 |
| ODF4       | 0.564 | 2.444E-01 | 9.041E-04 |
| GEM        | 0.563 | 1.697E-02 | 2.115E-02 |
| GOT1L1     | 0.563 | 2.755E-01 | 6.340E-06 |
| TMEM61     | 0.562 | 9.271E-02 | 1.773E-02 |
| PTGDR2     | 0.562 | 5.744E-02 | 1.743E-03 |
| KCNE4      | 0.562 | 1.184E-02 | 1.366E-03 |
| POTEM      | 0.561 | 5.749E-01 | 4.010E-06 |
| AC112484.1 | 0.561 | 4.318E-03 | 8.525E-02 |

|           |       |           |           |
|-----------|-------|-----------|-----------|
| TIMP2     | 0.560 | 8.650E-03 | 1.463E-01 |
| GABRR1    | 0.560 | 2.135E-01 | 3.271E-01 |
| MTUS2     | 0.559 | 2.060E-01 | 1.261E-01 |
| GH2       | 0.559 | 6.039E-01 | 1.088E-04 |
| NMNAT2    | 0.559 | 6.757E-02 | 6.366E-03 |
| PPP1R14A  | 0.559 | 1.100E-02 | 3.419E-03 |
| TSPAN2    | 0.558 | 1.916E-02 | 1.287E-01 |
| SNAX-DISC | 0.556 | 8.244E-02 | 1.772E-02 |
| RTBDN     | 0.556 | 1.137E-01 | 4.115E-02 |
| APOBEC3B  | 0.556 | 1.184E-02 | 4.553E-04 |
| PCDHA10   | 0.556 | 1.192E-01 | 4.050E-02 |
| TCEA3     | 0.556 | 3.471E-03 | 2.117E-03 |
| FADS6     | 0.556 | 2.392E-01 | 5.926E-03 |
| ABLIM2    | 0.556 | 1.569E-02 | 2.862E-01 |
| MIR3164   | 0.555 | 6.072E-02 | 1.912E-02 |
| GABRG1    | 0.555 | 4.980E-01 | 7.440E-05 |
| SSC5D     | 0.555 | 3.113E-02 | 1.327E-03 |
| SERTM1    | 0.554 | 4.157E-01 | 2.038E-02 |
| FAM78B    | 0.554 | 7.167E-02 | 7.867E-03 |
| ABCG2     | 0.553 | 1.541E-02 | 5.976E-02 |
| WFDC13    | 0.553 | 1.897E-01 | 1.818E-04 |
| CFAP74    | 0.553 | 5.411E-02 | 5.940E-06 |
| OR1J4     | 0.552 | 1.349E-01 | 6.684E-02 |
| FGF5      | 0.552 | 2.154E-01 | 5.707E-02 |
| TMEM139   | 0.552 | 8.849E-02 | 4.980E-03 |
| CH25H     | 0.551 | 1.620E-02 | 4.440E-05 |
| FGF4      | 0.551 | 6.329E-01 | 7.900E-04 |
| P2RX2     | 0.551 | 1.595E-01 | 8.562E-02 |
| CPXM2     | 0.551 | 4.667E-02 | 1.840E-01 |
| KRTAP4-7  | 0.551 | 7.283E-01 | 2.014E-03 |
| GSTA5     | 0.550 | NA        | 3.410E-01 |
| MAPK4     | 0.550 | 1.724E-01 | 4.800E-02 |
| ADPRHL1   | 0.549 | 1.033E-03 | 1.296E-01 |
| SEMA7A    | 0.549 | 5.304E-03 | 4.997E-04 |
| ADAM33    | 0.549 | 4.814E-02 | 9.017E-02 |
| CHI3L1    | 0.548 | 1.141E-01 | 1.748E-02 |
| SLC15A2   | 0.548 | 5.419E-03 | 1.418E-02 |
| GABRQ     | 0.548 | 1.926E-01 | 2.902E-03 |
| FBXL22    | 0.548 | 8.304E-03 | 1.987E-04 |
| CILP      | 0.547 | 1.926E-01 | 9.629E-03 |
| MIR4636   | 0.547 | NA        | 2.885E-02 |
| LCE3C     | 0.547 | NA        | 1.926E-01 |
| CNNM1     | 0.546 | 1.096E-01 | 2.282E-03 |
| C2orf50   | 0.546 | 2.724E-02 | 8.927E-04 |
| CCDC105   | 0.546 | 4.171E-01 | 1.164E-01 |
| CD55      | 0.546 | 1.073E-03 | 3.447E-01 |
| IFNB1     | 0.546 | 3.438E-01 | 1.399E-01 |
| SELP      | 0.546 | 4.982E-02 | 1.341E-03 |
| KIRREL3   | 0.546 | 8.336E-03 | 3.974E-01 |
| APELA     | 0.545 | 2.017E-01 | 4.244E-02 |

|          |       |           |           |
|----------|-------|-----------|-----------|
| HAND1    | 0.545 | 3.698E-01 | 4.858E-02 |
| FAM92B   | 0.545 | 2.113E-01 | 8.475E-02 |
| ETV1     | 0.545 | 4.871E-03 | 3.895E-02 |
| MYO1H    | 0.544 | 4.954E-03 | 4.815E-03 |
| STAC2    | 0.544 | 1.089E-01 | 1.358E-01 |
| ARID3C   | 0.543 | 1.541E-02 | 4.330E-02 |
| CMYA5    | 0.543 | 1.798E-02 | 2.336E-02 |
| CCL2     | 0.543 | 2.724E-02 | 1.067E-02 |
| ROPN1B   | 0.542 | 3.448E-02 | 4.441E-02 |
| TPTE     | 0.542 | 6.048E-01 | 2.289E-02 |
| SBSPON   | 0.541 | 5.234E-02 | 9.850E-02 |
| TM4SF1   | 0.539 | 2.123E-02 | 6.954E-02 |
| NOTUM    | 0.539 | 8.246E-02 | 8.096E-03 |
| SPEF2    | 0.538 | 3.515E-02 | 5.269E-02 |
| MRVI1    | 0.538 | 1.342E-02 | 1.882E-03 |
| TNFRSF19 | 0.537 | 1.137E-01 | 3.148E-03 |
| OR56A5   | 0.537 | 4.667E-01 | 3.934E-04 |
| RHPN2    | 0.537 | 3.613E-03 | 5.159E-02 |
| FAM166A  | 0.536 | 4.195E-02 | 1.023E-01 |
| FAT4     | 0.536 | 6.967E-03 | 1.981E-04 |
| SNED1    | 0.536 | 3.691E-03 | 3.470E-02 |
| MUM1L1   | 0.536 | 1.020E-01 | 4.721E-02 |
| ZNF703   | 0.536 | 7.652E-03 | 4.045E-03 |
| COL8A2   | 0.536 | 2.432E-02 | 2.111E-01 |
| CDKN2C   | 0.536 | 1.976E-03 | 6.666E-02 |
| TNS1     | 0.535 | 2.581E-02 | 4.521E-02 |
| ISM1     | 0.535 | 2.912E-02 | 5.286E-02 |
| TMEM200B | 0.534 | 1.057E-02 | 4.573E-04 |
| TRPV2    | 0.534 | 1.306E-02 | 3.897E-02 |
| COL6A2   | 0.534 | 2.595E-02 | 5.172E-02 |
| VGLL3    | 0.533 | 4.285E-02 | 9.985E-03 |
| ANKRD66  | 0.533 | 3.897E-01 | 2.539E-02 |
| APCDD1L  | 0.532 | 1.422E-01 | 1.880E-01 |
| PPL      | 0.532 | 2.045E-03 | 1.480E-01 |
| PIP      | 0.532 | 3.353E-01 | 2.713E-04 |
| PRELP    | 0.531 | 7.266E-02 | 1.087E-04 |
| FBLN7    | 0.531 | 2.436E-02 | 8.363E-02 |
| TPM1     | 0.529 | 3.019E-03 | 2.892E-02 |
| WBSCR28  | 0.529 | 1.001E-01 | 1.737E-03 |
| IRX2     | 0.528 | 3.338E-01 | 1.060E-05 |
| RGN      | 0.528 | 6.306E-02 | 3.560E-03 |
| ALPP     | 0.527 | 2.763E-01 | 2.812E-02 |
| MMP23B   | 0.526 | 2.856E-02 | 1.480E-05 |
| CSRP3    | 0.524 | 2.045E-01 | 1.198E-01 |
| RHCE     | 0.524 | 1.087E-02 | 2.255E-04 |
| FOXD1    | 0.524 | 1.684E-01 | 6.510E-02 |
| SOD3     | 0.524 | 4.299E-02 | 3.400E-03 |
| IQCJ     | 0.523 | 4.077E-01 | 4.054E-03 |
| PTPRT    | 0.523 | 2.280E-01 | 5.959E-03 |
| SRRM4    | 0.523 | 2.122E-01 | 5.530E-03 |

|            |       |           |           |
|------------|-------|-----------|-----------|
| AP003419.2 | 0.523 | 4.579E-01 | 1.975E-03 |
| LY6G6C     | 0.522 | 1.637E-01 | 2.087E-02 |
| PDLIM3     | 0.522 | 5.985E-02 | 2.806E-03 |
| CST5       | 0.522 | 3.789E-01 | 1.340E-01 |
| DOK5       | 0.522 | 3.887E-02 | 3.109E-01 |
| SORBS1     | 0.522 | 7.663E-02 | 7.659E-02 |
| PRRT4      | 0.521 | 8.600E-02 | 7.217E-02 |
| BHMT2      | 0.520 | 6.772E-02 | 1.035E-02 |
| PACSIN1    | 0.520 | 5.244E-02 | 7.390E-03 |
| CLDN4      | 0.519 | 1.290E-02 | 4.999E-02 |
| FGF7       | 0.519 | 1.200E-01 | 1.358E-02 |
| GRB7       | 0.519 | 8.072E-03 | 7.191E-02 |
| TCEAL7     | 0.518 | 1.298E-02 | 1.332E-01 |
| CACNA2D1   | 0.518 | 4.573E-02 | 3.969E-02 |
| COL4A4     | 0.518 | 6.270E-02 | 7.436E-02 |
| AMPH       | 0.517 | 3.904E-02 | 7.827E-04 |
| CREB3L2    | 0.517 | 4.460E-06 | 1.770E-03 |
| SUN3       | 0.517 | 9.054E-02 | 8.014E-02 |
| C20orf85   | 0.516 | 4.934E-01 | 1.126E-01 |
| BMP8B      | 0.516 | 1.164E-02 | 6.680E-08 |
| MAGEE2     | 0.516 | 3.274E-01 | 1.288E-03 |
| ITGA7      | 0.516 | 2.740E-02 | 4.241E-03 |
| CIB4       | 0.516 | 3.638E-01 | 1.135E-02 |
| F2RL3      | 0.515 | 8.782E-03 | 4.739E-04 |
| SFTPD      | 0.515 | 7.442E-02 | 3.394E-02 |
| PDZRN3     | 0.515 | 4.017E-02 | 1.340E-03 |
| CLEC4M     | 0.515 | 2.288E-01 | 1.653E-01 |
| SLC24A2    | 0.514 | 5.841E-02 | 7.055E-02 |
| ANGPTL1    | 0.514 | 1.297E-01 | 3.320E-01 |
| NEGR1      | 0.514 | 7.581E-02 | 3.311E-03 |
| COL6A1     | 0.513 | 2.906E-02 | 1.107E-03 |
| FBXO32     | 0.513 | 5.710E-03 | 1.889E-01 |
| SPARCL1    | 0.513 | 1.286E-02 | 7.790E-02 |
| EMILIN1    | 0.512 | 3.714E-02 | 9.340E-03 |
| ERVV-1     | 0.512 | 2.510E-01 | 7.880E-03 |
| TMEM229A   | 0.511 | 3.489E-01 | 2.306E-01 |
| HTR1D      | 0.511 | 1.381E-01 | 3.384E-04 |
| CTAGE6     | 0.511 | 1.495E-01 | 4.918E-04 |
| HTR2A      | 0.511 | 1.389E-01 | 2.286E-04 |
| DCLK3      | 0.510 | 2.469E-02 | 2.325E-02 |
| ASPN       | 0.510 | 9.793E-02 | 3.583E-01 |
| PRR9       | 0.510 | 4.222E-01 | 5.255E-02 |
| CKMT2      | 0.510 | 8.198E-03 | 1.682E-01 |
| RAPSN      | 0.510 | 1.006E-01 | 4.760E-06 |
| LCN10      | 0.509 | 2.917E-01 | 1.343E-01 |
| TPBGL      | 0.508 | 5.998E-02 | 1.169E-03 |
| OTOR       | 0.508 | 5.697E-01 | 1.447E-02 |
| SFRP4      | 0.507 | 2.583E-01 | 1.368E-01 |
| SFTPC      | 0.507 | 3.839E-01 | 3.610E-04 |
| RNF222     | 0.506 | 1.104E-01 | 2.717E-02 |



|          |       |           |           |
|----------|-------|-----------|-----------|
| LAMA2    | 0.506 | 5.617E-03 | 5.219E-02 |
| FHL1     | 0.505 | 9.606E-02 | 1.541E-01 |
| LYPD3    | 0.505 | 4.505E-02 | 7.330E-06 |
| KLK15    | 0.505 | 4.962E-01 | 3.259E-03 |
| POPDC2   | 0.504 | 4.155E-02 | 6.702E-02 |
| KCND2    | 0.504 | 3.559E-02 | 1.955E-01 |
| TBC1D3K  | 0.504 | 4.299E-01 | 1.464E-01 |
| AADAACL2 | 0.503 | 4.739E-01 | 1.809E-01 |
| OR56A1   | 0.503 | NA        | 7.036E-03 |
| ZNF716   | 0.502 | 5.641E-01 | 2.472E-01 |
| SCD5     | 0.502 | 2.595E-02 | 7.750E-03 |
| ECM1     | 0.502 | 1.537E-02 | 8.147E-02 |
| STPG4    | 0.501 | 1.899E-01 | 5.827E-02 |
| GADD45B  | 0.501 | 4.641E-03 | 1.238E-01 |
| TNFSF4   | 0.501 | 3.122E-02 | 1.035E-03 |
| CCR10    | 0.501 | 3.375E-02 | 5.714E-03 |
| OTOA     | 0.501 | 1.949E-02 | 1.311E-01 |
| TMEM45A  | 0.501 | 1.300E-01 | 1.259E-03 |
| TGFBI    | 0.501 | 8.675E-02 | 1.950E-02 |
| MIR151B  | 0.500 | NA        | 2.050E-02 |
| BNC2     | 0.500 | 6.431E-02 | 5.520E-04 |
| VCX3A    | 0.500 | 3.884E-01 | 5.879E-02 |
| ICAM5    | 0.500 | 6.660E-02 | 2.575E-03 |
| COL6A3   | 0.499 | 3.722E-02 | 1.466E-01 |
| JPH2     | 0.499 | 8.682E-02 | 3.002E-02 |
| OMD      | 0.499 | 2.574E-01 | 1.206E-03 |
| P4HA3    | 0.499 | 3.647E-02 | 3.498E-02 |
| TRPM5    | 0.498 | 2.027E-01 | 5.888E-03 |
| LRRN4    | 0.498 | 1.379E-01 | 6.068E-02 |
| POU1F1   | 0.498 | 9.171E-02 | 8.026E-02 |
| HELT     | 0.497 | 6.436E-01 | 9.001E-03 |
| SOWAHB   | 0.497 | 3.078E-02 | 1.049E-01 |
| ACOT4    | 0.497 | 1.948E-03 | 9.384E-04 |
| C17orf64 | 0.497 | 1.132E-01 | 3.890E-05 |
| OMMD3-BM | 0.496 | 2.185E-01 | 2.672E-01 |
| EPB41L4B | 0.496 | 4.680E-03 | 8.632E-03 |
| FAM20C   | 0.496 | 3.536E-02 | 3.156E-03 |
| LUM      | 0.496 | 4.300E-02 | 3.254E-01 |
| TMEM74   | 0.495 | 1.706E-01 | 4.546E-02 |
| SLC1A2   | 0.495 | 4.694E-02 | 1.254E-01 |
| CDC20B   | 0.494 | 1.309E-01 | 4.256E-02 |
| ASB10    | 0.494 | 3.527E-01 | 1.450E-01 |
| EFNA1    | 0.492 | 1.156E-03 | 1.572E-01 |
| RSPH1    | 0.491 | 2.750E-02 | 6.864E-02 |
| AKAP12   | 0.491 | 2.998E-02 | 2.629E-03 |
| RGS2     | 0.491 | 2.481E-02 | 8.911E-02 |
| GAN      | 0.491 | 4.423E-04 | 7.430E-04 |
| POSTN    | 0.491 | 1.253E-01 | 2.090E-02 |
| QPRT     | 0.491 | 7.926E-02 | 2.548E-01 |
| CRAT     | 0.490 | 1.697E-03 | 6.688E-02 |

|         |       |           |           |
|---------|-------|-----------|-----------|
| GAS7    | 0.490 | 3.147E-02 | 2.196E-01 |
| HUNK    | 0.490 | 1.042E-01 | 4.198E-04 |
| PPEF1   | 0.489 | 4.689E-02 | 1.950E-01 |
| REG1A   | 0.489 | 5.991E-01 | 1.641E-01 |
| PCDHA8  | 0.489 | 3.842E-01 | 2.375E-04 |
| NTM     | 0.489 | 3.739E-02 | 1.585E-02 |
| BPI     | 0.488 | 1.341E-01 | 1.465E-02 |
| TRIM24  | 0.488 | 1.659E-03 | 3.107E-02 |
| GABRP   | 0.488 | 3.840E-01 | 4.678E-01 |
| EEF1A2  | 0.487 | 2.427E-01 | 6.113E-02 |
| GDF5    | 0.487 | 1.937E-01 | 8.114E-02 |
| XKR7    | 0.487 | 3.205E-01 | 6.664E-02 |
| GRID2   | 0.487 | 4.543E-01 | 1.723E-03 |
| OPRL1   | 0.487 | 4.406E-03 | 2.193E-01 |
| KALRN   | 0.487 | 3.205E-02 | 1.829E-02 |
| TBX5    | 0.486 | 7.483E-02 | 2.530E-02 |
| DNAI1   | 0.486 | 1.707E-01 | 1.786E-03 |
| NALCN   | 0.486 | 9.863E-02 | 5.785E-02 |
| UBXN10  | 0.485 | 4.853E-02 | 1.987E-01 |
| MMP11   | 0.485 | 1.404E-01 | 6.218E-02 |
| HHLA1   | 0.485 | 4.415E-01 | 5.494E-03 |
| CSF2RA  | 0.485 | 4.560E-02 | 2.355E-02 |
| ENPP5   | 0.485 | 3.639E-02 | 5.850E-02 |
| COLEC12 | 0.485 | 9.960E-02 | 1.006E-02 |
| TEKT1   | 0.485 | 2.044E-01 | 6.044E-04 |
| IL36B   | 0.484 | 3.581E-01 | 3.484E-04 |
| CDH11   | 0.484 | 4.662E-02 | 4.843E-03 |
| KLK4    | 0.484 | 2.853E-01 | 1.199E-02 |
| GNG4    | 0.483 | 2.286E-01 | 5.340E-03 |
| TSGA13  | 0.483 | 2.469E-01 | 2.134E-04 |
| SLC8A2  | 0.483 | 1.117E-01 | 1.155E-01 |
| E2F2    | 0.482 | 7.447E-03 | 1.181E-02 |
| NLRP2B  | 0.482 | 1.407E-01 | 3.394E-02 |
| PCDH10  | 0.482 | 2.176E-01 | 4.890E-05 |
| PRND    | 0.482 | 2.013E-01 | 6.493E-04 |
| ZNF728  | 0.482 | 4.150E-01 | 4.746E-02 |
| ASAP3   | 0.482 | 1.033E-03 | 5.789E-03 |
| CDA     | 0.481 | 1.340E-01 | 1.072E-04 |
| OR2AE1  | 0.481 | 2.491E-01 | 1.815E-01 |
| PRSS8   | 0.480 | 2.574E-02 | 2.497E-02 |
| SSTR4   | 0.480 | 6.338E-01 | 8.082E-02 |
| PYCR1   | 0.480 | 1.586E-02 | 2.471E-02 |
| MNS1    | 0.480 | 5.442E-03 | 1.803E-03 |
| LIN7A   | 0.480 | 5.457E-02 | 1.095E-02 |
| SLC45A1 | 0.480 | 1.141E-02 | 2.749E-03 |
| MUC20   | 0.480 | 1.040E-01 | 3.026E-01 |
| MAGEB10 | 0.479 | 6.813E-01 | 1.225E-02 |
| ZSCAN5B | 0.479 | 2.233E-01 | 1.001E-03 |
| S1PR3   | 0.478 | 2.835E-02 | 1.878E-02 |
| TNFSF15 | 0.478 | 3.749E-02 | 2.602E-01 |

|            |       |           |           |
|------------|-------|-----------|-----------|
| EDAR       | 0.478 | 1.734E-01 | 7.794E-03 |
| HAND2      | 0.478 | 1.656E-01 | 9.986E-02 |
| SULT2B1    | 0.478 | 1.595E-01 | 8.101E-04 |
| SLC44A2    | 0.477 | 5.710E-05 | 2.044E-01 |
| SEMA3A     | 0.477 | 6.772E-02 | 1.404E-04 |
| TGFB1I1    | 0.476 | 6.603E-03 | 1.827E-02 |
| TMEM190    | 0.475 | 4.738E-02 | 3.883E-03 |
| MRGPRF     | 0.475 | 6.427E-02 | 1.099E-02 |
| HIST1H4E   | 0.475 | 7.953E-02 | 7.307E-01 |
| ASIP       | 0.475 | 3.536E-02 | 4.784E-01 |
| SCN11A     | 0.474 | 1.552E-01 | 4.317E-02 |
| PRORY      | 0.474 | 7.475E-01 | 2.228E-03 |
| YBX2       | 0.474 | 1.983E-01 | 5.219E-02 |
| ADGB       | 0.474 | 3.558E-01 | 1.836E-02 |
| CT45A3     | 0.473 | NA        | 7.286E-03 |
| PLA2G16    | 0.473 | 9.639E-02 | 6.150E-05 |
| GMNC       | 0.473 | 4.971E-01 | 8.422E-02 |
| HIF3A      | 0.473 | 2.091E-01 | 2.680E-03 |
| SPEG       | 0.473 | 9.752E-02 | 7.783E-02 |
| AC092143.1 | 0.473 | 3.289E-01 | 7.246E-02 |
| OR10H5     | 0.473 | 5.246E-01 | 3.654E-01 |
| OR7D2      | 0.473 | 2.701E-01 | 1.842E-02 |
| C1QTNF1    | 0.472 | 3.656E-02 | 1.725E-02 |
| CERCAM     | 0.472 | 8.964E-03 | 3.418E-02 |
| NEU2       | 0.472 | 6.304E-01 | 2.858E-02 |
| HS3ST4     | 0.472 | 4.002E-01 | 4.632E-03 |
| PTPN5      | 0.472 | 9.109E-02 | 7.961E-01 |
| N4BP3      | 0.471 | 3.891E-03 | 3.375E-02 |
| AKR1D1     | 0.471 | 2.122E-01 | 5.908E-03 |
| MIR4756    | 0.471 | NA        | 1.336E-02 |
| ENDOU      | 0.471 | 1.169E-01 | 2.106E-01 |
| EGFR       | 0.471 | 5.632E-02 | 2.874E-02 |
| CHIT1      | 0.471 | 2.334E-01 | 6.735E-02 |
| NT5M       | 0.470 | 5.073E-02 | 2.494E-02 |
| ZNF521     | 0.470 | 3.001E-02 | 3.999E-03 |
| CCDC158    | 0.470 | 2.687E-02 | 4.611E-03 |
| NAV2       | 0.470 | 4.794E-03 | 1.502E-02 |
| FUT3       | 0.470 | 9.208E-02 | 4.196E-01 |
| HIST2H3C   | 0.469 | 5.170E-01 | 7.505E-04 |
| BAMBI      | 0.469 | 1.389E-01 | 1.370E-05 |
| ZNF860     | 0.469 | 7.915E-03 | 3.147E-02 |
| TMEM239    | 0.468 | 4.739E-01 | 1.601E-04 |
| FAM49A     | 0.468 | 1.572E-02 | 1.423E-01 |
| MC2R       | 0.468 | 5.024E-01 | 2.832E-04 |
| DEGS1      | 0.467 | 5.121E-03 | 1.521E-02 |
| CACNG1     | 0.467 | 4.014E-01 | 9.693E-03 |
| RAET1E     | 0.467 | 1.309E-01 | 2.517E-01 |
| AC015688.5 | 0.467 | 2.356E-01 | 5.110E-05 |
| ADH1B      | 0.466 | 3.572E-01 | 2.316E-01 |
| HSD17B6    | 0.466 | 4.092E-02 | 5.737E-01 |

|           |       |           |           |
|-----------|-------|-----------|-----------|
| DHCR24    | 0.466 | 1.220E-02 | 7.833E-03 |
| GATM      | 0.466 | 1.244E-01 | 9.159E-02 |
| MIR3616   | 0.465 | 4.330E-01 | 2.234E-03 |
| CNIH3     | 0.465 | 6.259E-02 | 1.204E-02 |
| CMA1      | 0.465 | 3.029E-01 | 5.531E-03 |
| KIAA1549L | 0.465 | 7.483E-02 | 1.244E-01 |
| C2orf54   | 0.464 | 1.510E-01 | 3.003E-04 |
| F3        | 0.464 | 1.357E-01 | 3.844E-01 |
| MSRB3     | 0.464 | 5.524E-02 | 2.577E-03 |
| LRRC3C    | 0.464 | 3.517E-01 | 1.631E-04 |
| KRT37     | 0.464 | 3.256E-01 | 5.637E-03 |
| TEPP      | 0.463 | 3.451E-01 | 1.150E-01 |
| GPR156    | 0.463 | 1.285E-01 | 7.218E-03 |
| FN1       | 0.463 | 1.125E-01 | 5.998E-03 |
| PCSK6     | 0.462 | 3.292E-02 | 3.084E-01 |
| MEDAG     | 0.462 | 8.912E-02 | 1.511E-02 |
| ADCY10    | 0.462 | 1.179E-01 | 6.001E-04 |
| CRYGN     | 0.462 | 1.491E-01 | 5.130E-06 |
| METRNL    | 0.461 | 6.392E-04 | 4.980E-05 |
| PDE1A     | 0.461 | 3.880E-02 | 5.645E-03 |
| SPSB4     | 0.461 | 2.113E-01 | 2.435E-01 |
| FIBIN     | 0.461 | 1.523E-01 | 3.707E-03 |
| 44088.000 | 0.461 | 5.194E-01 | 7.236E-03 |
| MAGEL2    | 0.461 | 1.376E-01 | 7.970E-02 |
| CDRT1     | 0.460 | 3.662E-02 | 5.982E-02 |
| DEFB1     | 0.460 | 2.443E-01 | 5.184E-02 |
| PARD6B    | 0.460 | 4.039E-03 | 2.710E-02 |
| FADS2     | 0.460 | 7.652E-02 | 5.398E-03 |
| SCN10A    | 0.459 | 5.013E-01 | 1.830E-05 |
| KLHDC7A   | 0.459 | 2.511E-01 | 2.861E-02 |
| ERV3-1    | 0.459 | 5.907E-02 | 9.590E-04 |
| STPG3     | 0.458 | 7.420E-02 | 1.608E-02 |
| CCDC114   | 0.458 | 3.887E-02 | 6.293E-02 |
| AOX1      | 0.458 | 1.796E-01 | 5.186E-02 |
| PLEKHF1   | 0.457 | 3.198E-02 | 1.114E-03 |
| CTHRC1    | 0.457 | 8.842E-02 | 4.416E-03 |
| FKBP10    | 0.457 | 4.147E-02 | 1.106E-02 |
| SAXO1     | 0.456 | 5.207E-02 | 2.297E-02 |
| FAM25A    | 0.455 | 2.641E-01 | 1.458E-02 |
| CDR1      | 0.455 | 3.288E-01 | 5.546E-02 |
| OSR2      | 0.455 | 5.764E-02 | 6.318E-03 |
| RNF223    | 0.455 | 8.534E-02 | 1.878E-02 |
| ART4      | 0.455 | 2.924E-01 | 8.769E-02 |
| FOLR1     | 0.455 | 2.962E-01 | 1.102E-01 |
| APOC2     | 0.454 | 1.290E-01 | 3.305E-02 |
| OR1F1     | 0.454 | 6.122E-01 | 2.734E-02 |
| AK5       | 0.454 | 1.336E-01 | 2.312E-02 |
| KCNE5     | 0.454 | 3.200E-02 | 3.153E-01 |
| UPK1A     | 0.454 | 3.559E-01 | 5.485E-01 |
| PCDHB2    | 0.453 | 1.291E-01 | 1.702E-01 |

|          |       |           |           |
|----------|-------|-----------|-----------|
| KLHL41   | 0.453 | 9.109E-02 | 1.883E-01 |
| SPRR1A   | 0.453 | 2.755E-01 | 2.266E-01 |
| FILIP1   | 0.453 | 7.355E-02 | 4.923E-02 |
| POTEG    | 0.452 | 2.772E-01 | 6.380E-02 |
| TCP11L1  | 0.452 | 1.748E-03 | 1.040E-01 |
| NCALD    | 0.452 | 1.617E-02 | 4.060E-05 |
| PAX2     | 0.452 | 3.995E-01 | 1.988E-02 |
| LACTBL1  | 0.452 | NA        | 5.713E-02 |
| MMP9     | 0.452 | 1.722E-01 | 5.540E-02 |
| GPX3     | 0.452 | 1.101E-01 | 2.891E-03 |
| IZUMO1   | 0.452 | 6.453E-02 | 2.110E-06 |
| SERPINE1 | 0.452 | 6.902E-02 | 3.512E-03 |
| GRHL3    | 0.451 | 1.321E-01 | 1.279E-03 |
| SRPX     | 0.451 | 1.168E-01 | 9.860E-06 |
| DENND2A  | 0.451 | 1.769E-02 | 1.776E-02 |
| CCDC80   | 0.451 | 1.134E-01 | 3.464E-02 |
| CAMP     | 0.450 | 2.214E-01 | 8.067E-04 |
| NPAS3    | 0.450 | 1.411E-01 | 1.933E-01 |
| RCVRN    | 0.450 | 1.346E-01 | 4.922E-02 |
| PLXNA4   | 0.450 | 1.584E-01 | 1.416E-02 |
| INMT     | 0.450 | 4.468E-02 | 1.311E-03 |
| MYOM1    | 0.450 | 6.581E-02 | 1.097E-01 |
| IL6      | 0.450 | 2.122E-01 | 1.036E-01 |
| RSPO2    | 0.449 | 4.171E-01 | 1.006E-02 |
| SPON1    | 0.449 | 1.086E-01 | 1.618E-04 |
| BICC1    | 0.449 | 7.558E-02 | 1.093E-01 |
| PRLHR    | 0.448 | 5.024E-01 | 7.010E-06 |
| COX8C    | 0.448 | 1.997E-01 | 1.594E-01 |
| C4orf26  | 0.448 | 2.819E-01 | 2.293E-04 |
| EMILIN3  | 0.448 | 1.113E-01 | 1.898E-02 |
| ADRA2A   | 0.448 | 8.643E-02 | 2.221E-01 |
| COL14A1  | 0.448 | 5.331E-02 | 2.711E-01 |
| TMEM252  | 0.448 | 4.243E-01 | 1.010E-02 |
| CT55     | 0.447 | 4.920E-01 | 4.770E-02 |
| RELN     | 0.447 | 1.586E-01 | 2.495E-01 |
| SYNGR4   | 0.447 | 4.603E-02 | 1.219E-03 |
| BEND7    | 0.447 | 7.800E-02 | 1.556E-03 |
| ADH6     | 0.447 | 2.140E-01 | 1.663E-01 |
| HSPA6    | 0.447 | 7.090E-02 | 6.015E-04 |
| WFIKKN2  | 0.447 | 1.880E-01 | 6.237E-03 |
| ALDH3B2  | 0.446 | 8.185E-02 | 5.400E-03 |
| BVES     | 0.446 | 9.529E-02 | 1.650E-05 |
| RD3      | 0.446 | 2.624E-01 | 4.733E-03 |
| IL1RL2   | 0.445 | 2.392E-02 | 3.338E-03 |
| DGKI     | 0.445 | 4.304E-02 | 3.970E-02 |
| ACP7     | 0.445 | 2.416E-01 | 1.259E-02 |
| GDAP1L1  | 0.445 | 8.925E-02 | 9.143E-02 |
| DIO2     | 0.445 | 1.360E-01 | 2.685E-02 |
| NKAIN4   | 0.445 | 1.876E-01 | 3.563E-03 |
| TTL7     | 0.444 | 3.868E-02 | 2.008E-02 |

|            |       |           |           |
|------------|-------|-----------|-----------|
| WWC1       | 0.444 | 5.207E-04 | 3.885E-03 |
| DDX53      | 0.444 | 6.324E-01 | 1.103E-01 |
| KATNAL2    | 0.444 | 8.189E-03 | 9.822E-02 |
| RFX8       | 0.443 | 8.374E-02 | 6.868E-03 |
| EMP3       | 0.443 | 6.544E-02 | 8.569E-01 |
| SRRM3      | 0.443 | 4.986E-02 | 1.117E-02 |
| ARSE       | 0.443 | 1.435E-01 | 6.502E-03 |
| KIAA0895   | 0.443 | 1.375E-02 | 6.779E-02 |
| SPTLC3     | 0.443 | 2.798E-02 | 1.574E-01 |
| LARGE2     | 0.443 | 9.590E-02 | 8.982E-03 |
| USP6NL     | 0.443 | 1.220E-05 | 8.540E-05 |
| HEPACAM2   | 0.442 | 3.688E-01 | 1.485E-04 |
| NTN5       | 0.442 | 8.336E-02 | 1.717E-02 |
| DCN        | 0.442 | 9.911E-02 | 4.146E-02 |
| HIST1H2BB  | 0.441 | 3.286E-01 | 5.333E-04 |
| GPR21      | 0.441 | 3.489E-01 | 7.912E-02 |
| P2RY2      | 0.441 | 1.697E-02 | 6.828E-02 |
| NAV3       | 0.440 | 1.332E-01 | 5.034E-02 |
| FOXO6      | 0.440 | 1.090E-01 | 1.270E-01 |
| HPGDS      | 0.440 | 5.254E-02 | 6.140E-03 |
| NMT-MINDY  | 0.440 | 4.565E-01 | 3.410E-05 |
| DUSP10     | 0.440 | 3.213E-02 | 2.942E-03 |
| GRIK4      | 0.439 | 1.491E-01 | 1.510E-05 |
| MIR4645    | 0.439 | 1.764E-01 | 1.881E-01 |
| NANOS3     | 0.439 | 3.200E-02 | 1.206E-02 |
| RCN3       | 0.439 | 5.883E-02 | 7.753E-03 |
| FP565260.3 | 0.439 | 8.669E-02 | 1.537E-02 |
| MYLK       | 0.438 | 1.056E-01 | 8.725E-04 |
| GPR139     | 0.438 | NA        | 9.227E-02 |
| C9orf129   | 0.438 | 5.109E-01 | 9.564E-02 |
| FXVD1      | 0.438 | 8.556E-02 | 1.574E-01 |
| MAB21L3    | 0.437 | 1.724E-01 | 4.000E-04 |
| SPINT2     | 0.437 | 6.274E-04 | 1.125E-03 |
| TNFSF11    | 0.437 | 1.359E-01 | 1.487E-02 |
| TMPRSS2    | 0.437 | 2.399E-01 | 5.419E-01 |
| RHOU       | 0.436 | 6.630E-02 | 9.216E-02 |
| GPR152     | 0.436 | 3.286E-01 | 5.249E-02 |
| RPEL1      | 0.436 | 6.506E-02 | 7.463E-02 |
| CFAP221    | 0.436 | 2.007E-01 | 1.420E-02 |
| GLT8D2     | 0.435 | 4.625E-02 | 3.642E-03 |
| FUT6       | 0.435 | 3.231E-01 | 2.109E-03 |
| EML1       | 0.435 | 1.695E-02 | 2.905E-02 |
| PAIP2B     | 0.435 | 3.300E-03 | 1.616E-02 |
| LIMS2      | 0.435 | 4.869E-02 | 2.560E-03 |
| GIP        | 0.435 | 3.543E-01 | 4.427E-02 |
| MALL       | 0.434 | 1.560E-01 | 1.223E-01 |
| TBL1Y      | 0.434 | 5.299E-01 | 2.116E-01 |
| RHOJ       | 0.434 | 1.375E-02 | 4.906E-03 |
| CDKN2B     | 0.434 | 1.471E-01 | 3.059E-03 |
| PPP1R12B   | 0.434 | 3.720E-02 | 4.001E-01 |

|            |       |           |           |
|------------|-------|-----------|-----------|
| HIST3H2BB  | 0.433 | 5.983E-02 | 7.164E-03 |
| LMCD1      | 0.433 | 3.887E-02 | 6.774E-02 |
| SLIT2      | 0.433 | 1.365E-01 | 2.364E-01 |
| C4B        | 0.432 | 1.817E-01 | 3.718E-02 |
| FBN2       | 0.432 | 2.453E-01 | 2.014E-01 |
| PSG3       | 0.432 | 5.839E-01 | 3.922E-01 |
| SLC2A6     | 0.431 | 3.450E-02 | 1.268E-01 |
| SLC35F4    | 0.431 | 1.653E-01 | 2.715E-02 |
| TMEM97     | 0.431 | 9.259E-02 | 2.207E-03 |
| NOV        | 0.431 | 8.842E-02 | 3.684E-02 |
| SLC25A31   | 0.431 | 3.308E-01 | 6.514E-01 |
| CALD1      | 0.431 | 3.200E-02 | 1.970E-06 |
| GGT5       | 0.431 | 4.572E-02 | 3.035E-01 |
| FAM81B     | 0.431 | 2.862E-01 | 4.990E-03 |
| ACOT6      | 0.430 | 3.056E-01 | 2.148E-02 |
| GAS1       | 0.430 | 1.896E-01 | 1.203E-01 |
| SLC38A11   | 0.430 | 1.333E-01 | 1.004E-01 |
| TMEM254    | 0.429 | 3.492E-04 | 3.821E-03 |
| SDR9C7     | 0.428 | 3.278E-01 | 5.070E-02 |
| OR51J1     | 0.428 | 6.826E-01 | 3.583E-02 |
| CCDC155    | 0.428 | 4.168E-01 | 7.929E-04 |
| TNNT2      | 0.427 | 1.637E-01 | 2.222E-02 |
| AC011346.1 | 0.427 | NA        | 2.365E-01 |
| L3MBTL4    | 0.427 | 1.680E-01 | 5.406E-02 |
| CEP295NL   | 0.427 | 1.782E-01 | 5.582E-03 |
| DUSP15     | 0.427 | 1.363E-01 | 4.134E-02 |
| PNMA5      | 0.427 | 5.307E-01 | 2.720E-03 |
| MAMDC2     | 0.427 | 1.702E-01 | 8.132E-02 |
| KCNA10     | 0.427 | 5.592E-01 | 6.492E-03 |
| ANK2       | 0.427 | 1.560E-01 | 4.811E-02 |
| TAS1R1     | 0.427 | 1.406E-01 | 2.925E-03 |
| DSCR4      | 0.427 | 6.663E-01 | 3.714E-01 |
| C10orf107  | 0.427 | 1.162E-01 | 1.029E-03 |
| KCNK12     | 0.426 | 1.471E-01 | 2.810E-02 |
| CTGF       | 0.426 | 7.953E-02 | 1.050E-05 |
| TUSC5      | 0.426 | 5.490E-01 | 4.762E-02 |
| AGBL4      | 0.426 | 2.329E-01 | 2.904E-01 |
| LYPD8      | 0.426 | 4.281E-01 | 3.259E-03 |
| SLC6A2     | 0.425 | 3.256E-01 | 1.201E-04 |
| LGALS1     | 0.425 | 3.745E-02 | 5.316E-03 |
| GNAO1      | 0.424 | 1.530E-01 | 1.526E-01 |
| SMC1B      | 0.424 | 1.692E-01 | 1.214E-02 |
| LMO3       | 0.424 | 2.161E-01 | 1.159E-03 |
| PCDH1      | 0.423 | 8.919E-03 | 3.152E-01 |
| FOXL2      | 0.423 | 2.855E-01 | 2.436E-03 |
| SUGCT      | 0.423 | 9.005E-02 | 1.393E-03 |
| OR10Q1     | 0.423 | NA        | 1.785E-02 |
| SPRY1      | 0.422 | 6.005E-03 | 1.873E-03 |
| MAGEB4     | 0.422 | 7.904E-01 | 9.981E-02 |
| COX6B2     | 0.421 | 1.351E-01 | 5.573E-02 |

|           |       |           |           |
|-----------|-------|-----------|-----------|
| KLK8      | 0.421 | 5.887E-01 | 4.477E-01 |
| RNASE1    | 0.421 | 5.895E-02 | 9.690E-03 |
| OR1N1     | 0.420 | NA        | 1.216E-01 |
| GPR62     | 0.420 | 1.207E-01 | 2.532E-01 |
| AKAP14    | 0.420 | 3.590E-01 | 1.514E-01 |
| ACER2     | 0.420 | 1.896E-01 | 3.720E-02 |
| STX19     | 0.420 | 2.004E-01 | 1.406E-02 |
| RASL12    | 0.420 | 6.515E-02 | 3.442E-03 |
| WNK4      | 0.419 | 1.667E-01 | 8.761E-02 |
| EFCAB8    | 0.419 | 1.221E-01 | 9.393E-03 |
| LTBP2     | 0.419 | 3.450E-02 | 6.241E-02 |
| HLF       | 0.419 | 1.786E-01 | 4.295E-04 |
| ENTPD2    | 0.419 | 1.316E-01 | 4.894E-03 |
| MISP3     | 0.419 | 3.578E-02 | 2.012E-02 |
| GNE       | 0.418 | 1.663E-02 | 1.060E-01 |
| PIWIL4    | 0.418 | 5.740E-02 | 4.543E-01 |
| IGSF21    | 0.417 | 1.390E-01 | 7.430E-05 |
| ABTB2     | 0.417 | 1.032E-02 | 1.002E-01 |
| TESMIN    | 0.417 | 3.974E-02 | 5.250E-03 |
| TMPRSS11B | 0.417 | 7.188E-01 | 2.196E-01 |
| HPR       | 0.417 | 4.320E-01 | 2.088E-02 |
| NUTM1     | 0.417 | 1.278E-01 | 3.460E-02 |
| GSTM5     | 0.416 | 1.991E-01 | 7.020E-05 |
| SCNN1B    | 0.416 | 2.627E-01 | 6.540E-04 |
| NEXN      | 0.416 | 6.991E-02 | 3.240E-01 |
| CRISPLD2  | 0.416 | 5.071E-02 | 8.924E-04 |
| NRXN2     | 0.416 | 1.358E-01 | 2.581E-01 |
| WNT16     | 0.416 | 2.035E-01 | 9.132E-02 |
| XKR9      | 0.415 | 1.050E-01 | 1.609E-01 |
| SLC27A6   | 0.415 | 3.965E-01 | 2.868E-03 |
| MIR193A   | 0.415 | 2.939E-01 | 2.000E-01 |
| IRX6      | 0.415 | 4.500E-01 | 1.948E-02 |
| LRRC53    | 0.415 | NA        | 2.347E-03 |
| PDGFRA    | 0.415 | 5.929E-02 | 3.271E-01 |
| SCARA5    | 0.415 | 2.960E-01 | 1.350E-01 |
| RERG      | 0.415 | 6.858E-02 | 9.542E-03 |
| S100A12   | 0.414 | 2.829E-01 | 2.721E-02 |
| DPYSL5    | 0.414 | 5.373E-01 | 4.252E-03 |
| ARMCX4    | 0.414 | 1.685E-02 | 8.016E-02 |
| DISP3     | 0.414 | 2.131E-01 | 4.380E-03 |
| WDR93     | 0.414 | 5.051E-02 | 3.667E-04 |
| ARRB1     | 0.414 | 1.286E-02 | 1.503E-04 |
| PPP1R1B   | 0.414 | 3.624E-01 | 9.503E-02 |
| BGN       | 0.414 | 6.648E-02 | 5.731E-03 |
| STAB2     | 0.414 | 1.336E-01 | 7.360E-01 |
| TRIM71    | 0.414 | 3.855E-01 | 1.368E-04 |
| OSBPL10   | 0.414 | 4.743E-03 | 2.137E-04 |
| CA4       | 0.413 | 4.415E-01 | 2.297E-03 |
| HIST2H4A  | 0.413 | 9.038E-02 | 2.016E-03 |
| TMPRSS11A | 0.413 | 3.617E-01 | 7.888E-03 |



|           |       |           |           |
|-----------|-------|-----------|-----------|
| CRLF2     | 0.413 | 1.509E-01 | 6.282E-03 |
| C1orf87   | 0.412 | 6.272E-01 | 4.625E-03 |
| APOA1     | 0.412 | 3.093E-01 | 2.264E-03 |
| CD70      | 0.412 | 2.173E-01 | 2.557E-01 |
| GCGR      | 0.412 | 2.836E-01 | 1.564E-01 |
| KRTAP5-1  | 0.412 | 2.628E-01 | 1.712E-01 |
| HAS2      | 0.411 | 1.786E-01 | 2.385E-02 |
| BEND6     | 0.411 | 5.163E-02 | 3.039E-01 |
| NECTIN4   | 0.411 | 5.457E-02 | 6.505E-01 |
| ADGRG4    | 0.411 | 5.088E-01 | 4.286E-02 |
| RIPOR3    | 0.411 | 5.620E-02 | 3.291E-02 |
| SLC23A1   | 0.411 | 1.252E-01 | 1.355E-02 |
| TTC23L    | 0.410 | 1.346E-01 | 3.762E-02 |
| PEX11A    | 0.410 | 3.691E-03 | 3.574E-03 |
| MOXD1     | 0.410 | 1.515E-01 | 7.635E-02 |
| COL11A1   | 0.408 | 3.228E-01 | 3.601E-02 |
| SH3RF3    | 0.408 | 2.451E-02 | 1.658E-02 |
| XPNPEP2   | 0.408 | 3.587E-01 | 4.599E-02 |
| EPHA5     | 0.408 | 3.810E-01 | 7.345E-03 |
| ILDR2     | 0.408 | 1.929E-01 | 2.081E-01 |
| KLF14     | 0.407 | 3.446E-01 | 3.501E-02 |
| NXPH4     | 0.407 | 2.101E-01 | 1.302E-01 |
| EPHA4     | 0.407 | 5.436E-02 | 1.038E-01 |
| OR5AU1    | 0.406 | 6.199E-01 | 2.077E-02 |
| SYT12     | 0.406 | 2.551E-01 | 2.884E-02 |
| CPT1A     | 0.406 | 1.052E-02 | 4.536E-03 |
| GTF2A1L   | 0.406 | 3.328E-01 | 8.782E-02 |
| AVPR1A    | 0.405 | 9.216E-02 | 1.292E-02 |
| UNC5A     | 0.405 | 1.743E-01 | 7.789E-03 |
| ADRA1A    | 0.405 | 3.823E-01 | 3.184E-01 |
| HIST1H2AC | 0.405 | 3.079E-02 | 3.378E-02 |
| TEX14     | 0.405 | 1.853E-02 | 1.841E-02 |
| GSG1L     | 0.404 | 2.831E-01 | 6.195E-03 |
| CRISP1    | 0.404 | 6.118E-01 | 1.093E-02 |
| DCST1     | 0.404 | 1.404E-02 | 4.891E-04 |
| PLA1A     | 0.404 | 1.410E-01 | 2.410E-03 |
| LALBA     | 0.404 | NA        | 3.439E-01 |
| SLC30A3   | 0.404 | 2.389E-01 | 8.100E-05 |
| NEK10     | 0.404 | 9.913E-02 | 1.496E-01 |
| ARSF      | 0.403 | 3.833E-01 | 2.288E-01 |
| GREM1     | 0.403 | 2.747E-01 | 5.314E-04 |
| LRRN4CL   | 0.403 | 8.343E-02 | 1.652E-01 |
| ANXA3     | 0.403 | 1.644E-01 | 1.370E-03 |
| PCDHGB5   | 0.402 | 2.134E-01 | 3.783E-03 |
| A2M       | 0.402 | 5.331E-02 | 5.378E-01 |
| FAM110B   | 0.402 | 1.013E-01 | 2.021E-03 |
| NRTN      | 0.402 | 1.195E-01 | 1.176E-01 |
| MMP21     | 0.402 | 1.584E-01 | 7.637E-03 |
| TMC1      | 0.402 | 2.044E-01 | 4.330E-03 |
| CYR61     | 0.402 | 7.144E-02 | 7.172E-01 |

|            |       |           |           |
|------------|-------|-----------|-----------|
| AP000721.1 | 0.401 | 2.490E-01 | 2.388E-02 |
| SAMD7      | 0.401 | 4.593E-01 | 4.569E-03 |
| FOXP2      | 0.401 | 1.850E-01 | 2.089E-02 |
| OR2B6      | 0.401 | 1.964E-01 | 1.765E-01 |
| SLC39A8    | 0.401 | 3.695E-02 | 1.552E-02 |
| ASB18      | 0.401 | 4.438E-01 | 3.488E-02 |
| TCP10L     | 0.401 | 1.121E-01 | 3.405E-04 |
| RIMS1      | 0.401 | 3.996E-01 | 1.233E-01 |
| AL355987.3 | 0.400 | 9.882E-02 | 6.014E-03 |
| OSCAR      | 0.400 | 1.132E-01 | 7.304E-03 |
| SHOX       | 0.400 | 4.378E-01 | 2.341E-02 |
| TNNC2      | 0.400 | 1.399E-01 | 4.995E-02 |
| MYADM      | 0.400 | 5.610E-02 | 8.747E-04 |
| PDGFRB     | 0.400 | 4.417E-02 | 2.260E-02 |
| FAP        | 0.399 | 1.713E-01 | 1.479E-01 |
| KRTAP1-5   | 0.399 | 3.241E-01 | 1.144E-03 |
| VWA1       | 0.399 | 1.015E-02 | 2.181E-01 |
| FAM198A    | 0.399 | 1.231E-01 | 2.445E-02 |
| PAX6       | 0.399 | 7.971E-02 | 2.538E-02 |
| OR8G5      | 0.399 | 6.672E-01 | 2.812E-04 |
| NR3C2      | 0.399 | 1.449E-01 | 1.076E-03 |
| FAM184A    | 0.399 | 8.949E-02 | 3.608E-04 |
| AS3MT      | 0.398 | 1.830E-01 | 7.250E-05 |
| AC005324.3 | 0.398 | 1.097E-01 | 8.179E-02 |
| MEGF10     | 0.398 | 1.816E-01 | 8.935E-02 |
| GLIS1      | 0.397 | 1.517E-01 | 1.660E-06 |
| WWC3       | 0.397 | 1.151E-03 | 1.494E-02 |
| CYP7A1     | 0.397 | 3.617E-01 | 4.612E-02 |
| UCMA       | 0.397 | NA        | 7.362E-03 |
| AKAP6      | 0.396 | 1.331E-01 | 3.456E-02 |
| TSHB       | 0.396 | 4.669E-01 | 1.903E-01 |
| GLIS3      | 0.396 | 6.660E-02 | 5.861E-03 |
| AC008878.1 | 0.395 | 3.195E-01 | 1.347E-01 |
| TMEM178B   | 0.395 | 1.974E-01 | 6.360E-07 |
| GGTLC1     | 0.395 | 4.902E-01 | 5.129E-01 |
| BSPRY      | 0.394 | 3.952E-02 | 1.596E-01 |
| RALBP1     | 0.393 | 2.142E-02 | 9.182E-03 |
| KCNK6      | 0.393 | 5.053E-03 | 2.352E-02 |
| WNT2       | 0.393 | 1.734E-01 | 4.654E-02 |
| PLAT       | 0.392 | 1.894E-01 | 9.615E-03 |
| MTRNR2L7   | 0.392 | NA        | 8.988E-03 |
| DIO3       | 0.392 | 3.406E-01 | 9.775E-03 |
| FAM196B    | 0.392 | 3.422E-01 | 1.189E-01 |
| VCX3B      | 0.392 | 4.310E-01 | 1.035E-01 |
| RGS11      | 0.392 | 2.420E-01 | 8.242E-02 |
| DEFB124    | 0.391 | 3.308E-01 | 4.122E-02 |
| PDE9A      | 0.391 | 1.259E-01 | 1.523E-01 |
| SPOCK1     | 0.391 | 1.586E-01 | 1.346E-01 |
| CRIP2      | 0.390 | 2.517E-02 | 1.515E-01 |
| NPR1       | 0.390 | 5.746E-02 | 9.560E-05 |

|            |       |           |           |
|------------|-------|-----------|-----------|
| PRDM13     | 0.390 | 5.330E-01 | 4.500E-05 |
| RCAN1      | 0.390 | 1.804E-02 | 4.598E-03 |
| SSPO       | 0.390 | 1.110E-01 | 2.226E-01 |
| MYCL       | 0.389 | 1.612E-01 | 8.265E-03 |
| GALNT12    | 0.389 | 5.422E-02 | 5.695E-02 |
| WDR38      | 0.389 | 1.952E-01 | 1.879E-01 |
| TGM7       | 0.389 | 5.309E-01 | 1.043E-01 |
| GUCY2F     | 0.389 | 4.506E-01 | 5.495E-02 |
| MEOX1      | 0.389 | 1.604E-01 | 4.490E-01 |
| BPIFC      | 0.388 | 5.120E-01 | 6.129E-01 |
| FSTL3      | 0.388 | 1.363E-01 | 2.362E-02 |
| C16orf82   | 0.388 | NA        | 2.345E-01 |
| CRYBG2     | 0.387 | 6.003E-02 | 3.183E-02 |
| MPIG6B     | 0.387 | 1.238E-01 | 4.505E-02 |
| IFNA6      | 0.387 | NA        | 2.669E-02 |
| ITGB3      | 0.387 | 1.515E-01 | 6.047E-02 |
| BCO1       | 0.387 | 2.173E-01 | 9.390E-03 |
| EYA2       | 0.387 | 2.229E-01 | 1.473E-01 |
| RNF157     | 0.387 | 1.788E-01 | 1.383E-03 |
| C11orf96   | 0.387 | 1.107E-01 | 2.300E-02 |
| HIPK4      | 0.387 | 3.121E-02 | 7.005E-03 |
| NRP2       | 0.386 | 9.092E-02 | 7.943E-02 |
| RNF113B    | 0.386 | 4.006E-01 | 1.813E-01 |
| ADGRE2     | 0.386 | 7.285E-02 | 5.162E-02 |
| ATOH7      | 0.386 | 1.533E-01 | 1.597E-01 |
| RABGAP1L   | 0.386 | 1.394E-03 | 6.573E-02 |
| PCOLCE     | 0.386 | 7.926E-02 | 1.156E-01 |
| MYH14      | 0.385 | 7.775E-02 | 7.281E-03 |
| LINC00238  | 0.385 | 3.751E-01 | 1.500E-01 |
| CALCR      | 0.385 | 1.686E-01 | 1.108E-03 |
| C1orf116   | 0.384 | 8.684E-02 | 1.362E-01 |
| ZG16       | 0.383 | 4.756E-01 | 1.459E-03 |
| SNX31      | 0.383 | 4.216E-01 | 1.045E-02 |
| KHDRBS3    | 0.382 | 1.584E-01 | 5.411E-03 |
| ADGRD1     | 0.382 | 3.057E-01 | 6.212E-02 |
| PTGER3     | 0.382 | 2.693E-01 | 2.818E-01 |
| PAQR7      | 0.382 | 2.237E-02 | 1.659E-01 |
| ADAM9      | 0.382 | 1.065E-02 | 2.013E-02 |
| CDR2L      | 0.381 | 5.935E-03 | 8.880E-05 |
| PKD1L1     | 0.381 | 2.313E-01 | 1.244E-01 |
| HIST1H2BK  | 0.381 | 5.559E-02 | 1.011E-03 |
| HIST1H1C   | 0.381 | 9.873E-02 | 2.524E-03 |
| MACC1      | 0.380 | 1.333E-01 | 3.008E-01 |
| OCLN       | 0.380 | 5.575E-02 | 1.253E-02 |
| WSCD1      | 0.380 | 1.705E-01 | 5.927E-02 |
| AL163636.2 | 0.380 | 1.289E-01 | 4.264E-04 |
| INHBA      | 0.379 | 1.983E-01 | 1.096E-01 |
| NIPAL1     | 0.379 | 7.596E-02 | 3.072E-02 |
| APOE       | 0.379 | 1.714E-01 | 7.444E-03 |
| RASGEF1B   | 0.379 | 8.185E-02 | 9.383E-03 |

|            |       |           |           |
|------------|-------|-----------|-----------|
| ZNF813     | 0.379 | 1.447E-02 | 3.676E-01 |
| CD24       | 0.379 | 1.182E-01 | 2.291E-03 |
| BHLHE22    | 0.379 | 1.012E-01 | 2.781E-01 |
| PAPPA2     | 0.378 | 3.378E-01 | 8.162E-02 |
| IFNW1      | 0.378 | 5.210E-01 | 2.223E-04 |
| KLHDC9     | 0.378 | 1.050E-01 | 3.455E-01 |
| LINC00675  | 0.377 | 4.280E-01 | 1.560E-03 |
| VGLL1      | 0.377 | 2.419E-01 | 2.536E-04 |
| OR13J1     | 0.377 | 4.891E-01 | 2.605E-01 |
| AP002990.1 | 0.377 | 5.430E-05 | 2.746E-02 |
| EPN2       | 0.377 | 1.710E-05 | 1.199E-02 |
| RTL4       | 0.377 | NA        | 1.160E-01 |
| ADAMTS1    | 0.377 | 8.457E-02 | 1.271E-02 |
| WFDC3      | 0.377 | 1.595E-01 | 1.384E-02 |
| KDEL3      | 0.377 | 3.695E-02 | 1.009E-01 |
| ATP6V1B1   | 0.377 | 2.690E-01 | 2.913E-02 |
| ADAMTS12   | 0.377 | 1.679E-01 | 2.277E-02 |
| HIST1H4I   | 0.377 | 4.511E-02 | 6.196E-03 |
| SLC1A3     | 0.376 | 1.258E-01 | 1.586E-02 |
| PDGFB      | 0.376 | 2.142E-02 | 8.161E-02 |
| LCN2       | 0.376 | 3.770E-01 | 1.268E-02 |
| SERTAD4    | 0.376 | 7.934E-02 | 1.691E-01 |
| NPTXR      | 0.376 | 2.135E-01 | 1.546E-02 |
| C8orf88    | 0.376 | 2.288E-01 | 3.301E-03 |
| NEURL1B    | 0.375 | 2.401E-02 | 2.696E-01 |
| NRIP3      | 0.374 | 4.344E-02 | 1.008E-02 |
| CIART      | 0.374 | 1.028E-01 | 7.971E-03 |
| CSRP1      | 0.374 | 2.294E-02 | 5.996E-02 |
| SRY        | 0.374 | 5.847E-01 | 1.134E-01 |
| MMRN1      | 0.374 | 2.570E-01 | 1.255E-01 |
| NXNL2      | 0.373 | 1.891E-01 | 7.344E-01 |
| NPY5R      | 0.373 | 5.348E-01 | 2.382E-01 |
| AGXT2      | 0.373 | 5.662E-01 | 3.755E-01 |
| DEFA6      | 0.373 | 6.794E-01 | 3.686E-02 |
| FAIM2      | 0.373 | 2.835E-01 | 2.067E-03 |
| CXXC5      | 0.373 | 2.142E-02 | 1.030E-02 |
| CACNA1C    | 0.373 | 1.134E-01 | 6.304E-02 |
| SKIL       | 0.373 | 2.951E-03 | 2.463E-01 |
| AC137834.1 | 0.373 | 1.063E-01 | 1.220E-05 |
| ARMS2      | 0.372 | 2.917E-01 | 1.103E-03 |
| ASIC3      | 0.372 | 8.374E-02 | 3.073E-02 |
| CHRNA2     | 0.372 | 5.344E-01 | 1.345E-01 |
| CAMK2B     | 0.371 | 2.301E-01 | 9.471E-03 |
| FOXO4      | 0.371 | 6.165E-03 | 1.885E-03 |
| RGS22      | 0.371 | 2.356E-01 | 4.585E-02 |
| CHST4      | 0.371 | 3.439E-01 | 4.933E-03 |
| SLITRK4    | 0.371 | 3.314E-01 | 4.730E-03 |
| TNFAIP8L3  | 0.371 | 1.536E-01 | 1.000E-02 |
| DMD        | 0.370 | 1.724E-01 | 1.308E-02 |
| INSIG1     | 0.370 | 2.589E-02 | 4.275E-01 |

|            |       |           |           |
|------------|-------|-----------|-----------|
| SCRT2      | 0.370 | 7.094E-01 | 2.082E-01 |
| TTC39A     | 0.370 | 4.569E-02 | 1.654E-02 |
| SLC8A1     | 0.370 | 6.119E-02 | 1.316E-01 |
| MIR6829    | 0.370 | 5.596E-01 | 6.393E-02 |
| EPHB2      | 0.370 | 6.581E-02 | 3.542E-01 |
| C2orf71    | 0.369 | 4.014E-01 | 3.901E-02 |
| CD99       | 0.369 | 8.128E-03 | 3.930E-03 |
| SPINT1     | 0.369 | 6.958E-03 | 6.087E-02 |
| PRDM6      | 0.369 | 1.680E-01 | 3.660E-03 |
| DNM1       | 0.369 | 7.926E-02 | 9.126E-03 |
| HS3ST6     | 0.368 | 4.617E-01 | 1.117E-01 |
| TAS2R40    | 0.368 | NA        | 1.918E-02 |
| FETUB      | 0.368 | 5.713E-01 | 5.062E-03 |
| ZMAT1      | 0.368 | 1.443E-01 | 2.407E-01 |
| AC004691.2 | 0.368 | 2.293E-01 | 1.852E-01 |
| DDR2       | 0.368 | 1.172E-01 | 7.210E-02 |
| CYSRT1     | 0.368 | 1.761E-01 | 3.021E-02 |
| CNN3       | 0.368 | 8.422E-03 | 1.997E-02 |
| NECAB1     | 0.367 | 1.902E-01 | 2.200E-02 |
| AC138894.1 | 0.367 | 2.393E-01 | 1.412E-03 |
| CLCNKB     | 0.367 | 1.818E-01 | 1.980E-02 |
| DOC2A      | 0.367 | 2.934E-01 | 3.534E-01 |
| LEPR       | 0.367 | 4.300E-02 | 1.193E-02 |
| SBSN       | 0.367 | 5.276E-01 | 1.280E-01 |
| DSCAM      | 0.366 | 5.299E-01 | 1.729E-01 |
| LBX1       | 0.366 | 6.465E-01 | 1.126E-03 |
| ADORA1     | 0.366 | 1.111E-01 | 6.325E-04 |
| CSPG5      | 0.366 | 1.493E-01 | 1.906E-02 |
| ARMCX1     | 0.366 | 8.809E-02 | 5.031E-02 |
| TACSTD2    | 0.366 | 3.638E-02 | 4.442E-01 |
| DRD5       | 0.365 | 4.471E-01 | 1.184E-01 |
| RNF133     | 0.365 | 2.359E-01 | 1.529E-01 |
| ERLIN2     | 0.365 | 8.919E-03 | 1.460E-02 |
| EHF        | 0.365 | 1.011E-01 | 1.400E-03 |
| OXT        | 0.365 | 2.565E-01 | 2.086E-02 |
| SYNC       | 0.365 | 1.472E-01 | 1.637E-03 |
| CD44       | 0.365 | 1.169E-01 | 1.599E-01 |
| AMOTL2     | 0.365 | 2.058E-02 | 2.399E-01 |
| RAB42      | 0.365 | 5.256E-02 | 1.044E-02 |
| GDF15      | 0.364 | 2.756E-01 | 2.567E-02 |
| RARRES2    | 0.364 | 1.764E-01 | 2.848E-01 |
| TMEM71     | 0.364 | 1.264E-01 | 7.542E-02 |
| ACSL1      | 0.364 | 2.069E-02 | 1.255E-03 |
| PDGFC      | 0.364 | 7.601E-02 | 2.697E-03 |
| 43900.000  | 0.364 | 1.539E-01 | 2.309E-01 |
| PRUNE2     | 0.364 | 3.483E-01 | 2.681E-04 |
| CCDC74A    | 0.363 | 3.896E-02 | 2.040E-02 |
| PTPN21     | 0.363 | 8.685E-04 | 2.110E-02 |
| SLC16A11   | 0.363 | 9.578E-02 | 2.517E-03 |
| MYO5B      | 0.363 | 4.479E-02 | 5.854E-01 |

|              |       |           |           |
|--------------|-------|-----------|-----------|
| DPYS         | 0.363 | 3.238E-01 | 6.451E-03 |
| PMEL         | 0.363 | 3.536E-02 | 1.339E-01 |
| OR6C70       | 0.362 | 7.837E-01 | 7.899E-01 |
| ZNF761       | 0.362 | 3.054E-02 | 6.031E-04 |
| TMOD1        | 0.362 | 2.225E-01 | 5.651E-02 |
| CRYM         | 0.362 | 3.056E-01 | 4.387E-01 |
| FAM171B      | 0.362 | 5.509E-02 | 6.547E-03 |
| AL691442.1   | 0.361 | 5.607E-01 | 2.138E-02 |
| SMPX         | 0.361 | 3.977E-01 | 2.757E-02 |
| MGLL         | 0.361 | 8.590E-02 | 3.220E-02 |
| PDZD4        | 0.361 | 1.674E-01 | 6.766E-03 |
| TWIST2       | 0.361 | 2.490E-01 | 1.617E-02 |
| TWIST1       | 0.361 | 2.044E-01 | 1.656E-04 |
| SLC12A5      | 0.361 | 1.427E-01 | 2.760E-01 |
| VASH2        | 0.360 | 1.714E-01 | 7.147E-01 |
| KCNJ6        | 0.360 | 2.753E-01 | 2.073E-03 |
| EMX2         | 0.360 | 4.429E-01 | 2.704E-01 |
| GRIN1        | 0.360 | 1.905E-01 | 2.563E-01 |
| ALPK2        | 0.360 | 3.054E-01 | 6.642E-02 |
| VCAN         | 0.360 | 1.866E-01 | 4.405E-02 |
| CKM          | 0.359 | 2.038E-01 | 6.182E-03 |
| GULP1        | 0.359 | 1.146E-01 | 4.527E-02 |
| CCL28        | 0.359 | 1.659E-01 | 3.309E-03 |
| RNF182       | 0.359 | 3.714E-01 | 3.545E-01 |
| MATN2        | 0.359 | 1.775E-01 | 2.372E-04 |
| VCX          | 0.359 | 5.025E-01 | 2.226E-03 |
| CDKL5        | 0.359 | 9.218E-03 | 8.113E-03 |
| CTXN3        | 0.358 | 7.251E-01 | 9.107E-02 |
| U2AF1L5      | 0.358 | 2.825E-01 | 2.099E-02 |
| PSMB11       | 0.358 | 5.568E-01 | 3.564E-02 |
| 7orf55-LUC71 | 0.357 | 3.056E-01 | 2.977E-01 |
| KLF9         | 0.357 | 4.702E-02 | 7.001E-01 |
| DLGAP2       | 0.357 | 2.689E-01 | 1.132E-03 |
| MIR365A      | 0.357 | 5.293E-01 | 1.566E-01 |
| CAMK2A       | 0.357 | 3.099E-01 | 6.881E-02 |
| TMC5         | 0.357 | 2.715E-01 | 1.727E-02 |
| AKT3         | 0.357 | 7.536E-02 | 2.292E-01 |
| CCER1        | 0.357 | NA        | 7.969E-02 |
| HIST2H2AA4   | 0.357 | 5.316E-01 | 6.960E-05 |
| ZCCHC24      | 0.357 | 7.637E-02 | 2.576E-01 |
| SLPI         | 0.356 | 3.832E-01 | 1.953E-01 |
| HSD3B7       | 0.356 | 2.141E-02 | 2.507E-04 |
| LRRC20       | 0.356 | 6.831E-03 | 2.536E-01 |
| CAVIN3       | 0.356 | 8.413E-02 | 1.421E-02 |
| MIR1915      | 0.356 | 5.776E-01 | 1.426E-01 |
| TFAP2C       | 0.356 | 3.715E-02 | 1.328E-02 |
| KRTAP29-1    | 0.356 | 3.914E-01 | 4.302E-02 |
| NNMT         | 0.356 | 2.358E-01 | 4.917E-02 |
| ZNF750       | 0.356 | 1.526E-01 | 5.844E-02 |
| CPXCR1       | 0.355 | 7.077E-01 | 2.155E-02 |

|            |       |           |           |
|------------|-------|-----------|-----------|
| TUBA1A     | 0.355 | 1.028E-01 | 9.252E-03 |
| LRRC17     | 0.355 | 2.329E-01 | 5.240E-03 |
| VIM        | 0.355 | 8.449E-02 | 1.641E-02 |
| WT1        | 0.355 | 5.001E-01 | 1.797E-04 |
| TMTC1      | 0.355 | 1.861E-01 | 6.127E-02 |
| MIR548V    | 0.355 | NA        | 8.277E-02 |
| NEBL       | 0.355 | 1.160E-01 | 5.347E-02 |
| GLP2R      | 0.355 | 3.475E-01 | 1.341E-01 |
| FRMD5      | 0.354 | 1.560E-01 | 1.619E-01 |
| OR9G1      | 0.354 | NA        | 3.257E-02 |
| RGMA       | 0.354 | 2.864E-01 | 2.229E-03 |
| RTKN2      | 0.354 | 6.285E-02 | 6.995E-02 |
| MRAP       | 0.354 | 4.490E-01 | 1.609E-02 |
| NLGN1      | 0.354 | 3.340E-01 | 9.240E-07 |
| RRAGD      | 0.354 | 6.295E-02 | 5.214E-03 |
| ACTL8      | 0.354 | 5.330E-01 | 5.036E-02 |
| PTGS1      | 0.354 | 2.843E-01 | 1.542E-02 |
| PLPPR5     | 0.354 | 4.181E-01 | 1.027E-01 |
| AL080251.1 | 0.354 | 3.373E-01 | 1.931E-02 |
| TRPS1      | 0.354 | 1.909E-01 | 9.634E-02 |
| CNIH2      | 0.354 | 1.745E-01 | 1.043E-01 |
| LHFP       | 0.353 | 4.089E-02 | 1.278E-01 |
| FBXO27     | 0.353 | 1.738E-01 | 4.218E-02 |
| SHANK1     | 0.353 | 1.865E-01 | 1.994E-02 |
| TIMP3      | 0.353 | 1.469E-01 | 1.060E-01 |
| FAM129A    | 0.353 | 1.097E-01 | 1.286E-02 |
| PEA15      | 0.353 | 3.492E-04 | 9.550E-04 |
| BST1       | 0.353 | 1.760E-01 | 3.557E-01 |
| SPTBN2     | 0.353 | 4.114E-02 | 2.759E-01 |
| FZD8       | 0.353 | 8.842E-02 | 1.263E-03 |
| PRRG1      | 0.353 | 3.611E-02 | 1.966E-01 |
| C3orf70    | 0.352 | 1.336E-01 | 5.304E-04 |
| C1orf204   | 0.352 | 6.530E-02 | 2.036E-02 |
| C2orf73    | 0.352 | 2.628E-01 | 2.472E-03 |
| KRTAP1-1   | 0.352 | 6.336E-01 | 2.106E-01 |
| YIF1B      | 0.352 | 7.178E-04 | 2.462E-01 |
| MIR5195    | 0.352 | 4.220E-01 | 2.882E-03 |
| GRIN2B     | 0.352 | 4.292E-01 | 1.774E-04 |
| FBN1       | 0.352 | 1.611E-01 | 1.052E-01 |
| AHNAK      | 0.352 | 1.615E-02 | 6.812E-02 |
| MIR125B2   | 0.352 | NA        | 1.878E-04 |
| 44077.000  | 0.351 | 2.853E-01 | 1.669E-02 |
| MYT1       | 0.351 | 5.289E-01 | 1.036E-03 |
| KAZN       | 0.351 | 9.834E-03 | 4.723E-03 |
| ADAM32     | 0.351 | 1.046E-01 | 1.695E-01 |
| NR2F2      | 0.351 | 1.558E-02 | 2.817E-01 |
| SYDE1      | 0.351 | 2.056E-02 | 1.344E-01 |
| SLC6A11    | 0.351 | 3.468E-01 | 8.080E-01 |
| ROBO2      | 0.350 | 3.231E-01 | 9.322E-02 |
| DPT        | 0.350 | 4.250E-01 | 8.258E-04 |

|            |       |           |           |
|------------|-------|-----------|-----------|
| RNF165     | 0.350 | 2.735E-01 | 1.317E-01 |
| TACR3      | 0.350 | 5.244E-01 | 2.829E-01 |
| RUNX1T1    | 0.350 | 1.930E-01 | 2.243E-02 |
| ABCD3      | 0.350 | 1.290E-02 | 1.771E-01 |
| EPPIN      | 0.350 | 5.764E-01 | 3.484E-03 |
| TDRD5      | 0.350 | 3.676E-01 | 3.483E-02 |
| C14orf132  | 0.349 | 1.830E-01 | 1.372E-01 |
| SEZ6       | 0.349 | 1.980E-01 | 5.095E-02 |
| HTR2B      | 0.349 | 1.498E-01 | 2.049E-02 |
| HIST2H3D   | 0.349 | 1.470E-01 | 8.655E-02 |
| HIC1       | 0.349 | 7.447E-02 | 2.830E-01 |
| TNFRSF12A  | 0.349 | 4.954E-02 | 2.510E-01 |
| EFNA2      | 0.349 | 4.950E-01 | 1.096E-01 |
| SMCO3      | 0.348 | 9.192E-02 | 3.381E-02 |
| EFHC2      | 0.348 | 2.836E-01 | 4.778E-01 |
| EPO        | 0.348 | 3.403E-01 | 2.538E-02 |
| DIXDC1     | 0.348 | 8.102E-02 | 7.185E-01 |
| SMIM10     | 0.348 | 4.852E-02 | 4.003E-02 |
| EVA1C      | 0.348 | 1.285E-01 | 1.244E-03 |
| ZNF454     | 0.348 | 1.975E-01 | 4.730E-06 |
| CLEC12B    | 0.348 | 4.425E-01 | 2.736E-02 |
| TTC7B      | 0.348 | 5.193E-03 | 3.747E-02 |
| GBA        | 0.348 | 1.251E-04 | 1.555E-01 |
| SLC16A5    | 0.348 | 1.530E-01 | 5.885E-02 |
| CHGA       | 0.347 | 4.939E-01 | 8.138E-03 |
| GLB1L3     | 0.347 | 4.944E-01 | 5.121E-01 |
| HRASLS     | 0.347 | 3.993E-01 | 9.647E-02 |
| CPT1C      | 0.347 | 1.369E-01 | 1.248E-01 |
| CAPG       | 0.347 | 2.361E-02 | 3.154E-01 |
| ZBBX       | 0.347 | 5.706E-01 | 1.555E-01 |
| ADAM30     | 0.346 | NA        | 2.516E-01 |
| EXD1       | 0.346 | 1.621E-01 | 1.648E-01 |
| ACTN4      | 0.346 | 6.640E-05 | 1.478E-04 |
| PLAU       | 0.346 | 1.461E-01 | 5.513E-02 |
| DBNDD1     | 0.346 | 8.518E-02 | 7.689E-01 |
| ERRFI1     | 0.346 | 5.005E-02 | 1.362E-01 |
| CARTPT     | 0.345 | 7.538E-01 | 9.907E-02 |
| MZB1       | 0.345 | 3.714E-01 | 1.869E-02 |
| CTXN1      | 0.345 | 1.595E-01 | 1.192E-01 |
| PQLC3      | 0.345 | 1.700E-03 | 2.635E-02 |
| AC003006.1 | 0.345 | 3.468E-01 | 2.827E-01 |
| ZIC2       | 0.344 | 4.031E-01 | 5.300E-03 |
| TPPP3      | 0.344 | 1.757E-01 | 1.294E-01 |
| FGFR2      | 0.344 | 1.576E-01 | 4.277E-04 |
| CAPN6      | 0.343 | 4.839E-01 | 6.049E-02 |
| HIST1H3D   | 0.343 | 1.418E-01 | 1.804E-03 |
| CDKN2D     | 0.343 | 1.505E-03 | 9.174E-03 |
| HIST1H2BD  | 0.343 | 8.294E-02 | 8.180E-03 |
| HIST2H2BE  | 0.343 | 1.009E-01 | 2.400E-01 |
| C9orf47    | 0.343 | 2.708E-01 | 1.257E-01 |



|            |       |           |           |
|------------|-------|-----------|-----------|
| GRIK5      | 0.342 | 2.077E-01 | 2.030E-01 |
| RGSL1      | 0.342 | 5.140E-01 | 1.213E-02 |
| SIPA1L3    | 0.342 | 2.603E-03 | 9.858E-02 |
| IRX3       | 0.342 | 3.213E-01 | 1.801E-01 |
| XG         | 0.342 | 2.547E-01 | 7.757E-04 |
| CD59       | 0.342 | 2.727E-02 | 1.465E-02 |
| MIR3939    | 0.341 | 5.686E-01 | 2.933E-01 |
| ANKRD53    | 0.341 | 6.546E-02 | 3.689E-01 |
| KCNMA1     | 0.341 | 2.257E-01 | 1.191E-04 |
| LHX2       | 0.340 | 4.664E-01 | 3.934E-02 |
| TMEM31     | 0.340 | 2.843E-01 | 1.440E-02 |
| PRKG1      | 0.340 | 1.309E-01 | 7.504E-01 |
| GRP        | 0.340 | 5.546E-01 | 1.934E-01 |
| ZFHX4      | 0.340 | 2.871E-01 | 1.432E-01 |
| AC120114.5 | 0.340 | 4.603E-02 | 2.270E-02 |
| ALDH1B1    | 0.340 | 3.647E-02 | 1.298E-01 |
| TDRD15     | 0.339 | 7.029E-01 | 2.994E-02 |
| DOCK3      | 0.339 | 2.466E-01 | 3.664E-02 |
| GCOM1      | 0.339 | 2.044E-01 | 6.481E-01 |
| COX7A1     | 0.339 | 1.090E-01 | 7.009E-02 |
| SLC50A1    | 0.339 | 1.110E-03 | 1.194E-02 |
| GGN        | 0.338 | 2.597E-02 | 4.598E-03 |
| NR2F1      | 0.338 | 1.152E-01 | 5.705E-03 |
| MYADML2    | 0.338 | 3.080E-01 | 4.895E-02 |
| CORO6      | 0.338 | 2.665E-01 | 1.885E-02 |
| IGSF5      | 0.338 | 4.080E-01 | 3.332E-03 |
| B4GALT6    | 0.338 | 1.341E-01 | 3.068E-02 |
| MAPK8IP2   | 0.337 | 2.566E-01 | 1.985E-01 |
| CORIN      | 0.337 | 1.693E-01 | 3.743E-02 |
| MTAP       | 0.337 | 1.699E-01 | 7.788E-01 |
| AXL        | 0.337 | 1.799E-01 | 1.144E-02 |
| IGDCC4     | 0.337 | 1.132E-01 | 4.373E-01 |
| ANO1       | 0.337 | 2.006E-01 | 3.262E-02 |
| MIR558     | 0.337 | NA        | 5.198E-02 |
| C3orf52    | 0.336 | 4.068E-02 | 2.700E-05 |
| APBA1      | 0.336 | 6.072E-02 | 1.641E-01 |
| MT1A       | 0.336 | 4.071E-01 | 1.644E-01 |
| SLC6A7     | 0.336 | 2.323E-01 | 1.743E-03 |
| TSPAN4     | 0.336 | 6.230E-02 | 1.053E-04 |
| HSF2BP     | 0.336 | 5.493E-02 | 3.976E-01 |
| BARX2      | 0.336 | 4.279E-01 | 1.106E-01 |
| LYVE1      | 0.335 | 2.092E-01 | 2.844E-04 |
| ADAM11     | 0.335 | 1.955E-01 | 4.022E-02 |
| APOLD1     | 0.335 | 5.393E-02 | 9.004E-02 |
| MTRNR2L5   | 0.335 | NA        | 5.220E-02 |
| LOXL3      | 0.335 | 2.939E-02 | 6.186E-02 |
| NTSR2      | 0.335 | 6.118E-01 | 1.007E-02 |
| CCNI2      | 0.334 | 3.638E-01 | 1.223E-01 |
| COL1A1     | 0.334 | 2.474E-01 | 1.611E-01 |
| STKLD1     | 0.334 | 2.134E-02 | 3.872E-02 |

|            |       |           |           |
|------------|-------|-----------|-----------|
| ZNF229     | 0.334 | 2.250E-01 | 2.851E-01 |
| AC099518.3 | 0.334 | 4.107E-01 | 2.209E-01 |
| PLPP4      | 0.334 | 4.020E-01 | 4.142E-02 |
| NPC1L1     | 0.334 | 2.536E-01 | 5.235E-03 |
| AFF3       | 0.334 | 2.871E-01 | 8.660E-02 |
| GPR37      | 0.334 | 3.839E-01 | 3.753E-02 |
| CALU       | 0.334 | 3.181E-03 | 2.575E-01 |
| TPRG1      | 0.333 | 1.249E-01 | 4.049E-01 |
| GSN        | 0.333 | 2.530E-02 | 1.798E-01 |
| SLC17A5    | 0.333 | 8.473E-03 | 2.163E-03 |
| ADAMTS6    | 0.333 | 1.285E-01 | 8.261E-02 |
| RORA       | 0.333 | 6.084E-02 | 1.224E-01 |
| PHEX       | 0.333 | 2.396E-01 | 9.959E-02 |
| HMCN2      | 0.332 | 2.437E-01 | 4.138E-01 |
| KIAA1161   | 0.332 | 2.992E-02 | 3.249E-01 |
| MIA-RAB4B  | 0.332 | 6.701E-01 | 3.550E-02 |
| POU2F3     | 0.332 | 2.437E-01 | 7.197E-01 |
| SGK2       | 0.332 | 4.374E-01 | 2.459E-02 |
| S100A7     | 0.332 | 6.218E-01 | 6.212E-01 |
| IZUMO3     | 0.332 | NA        | 1.796E-03 |
| SELE       | 0.332 | 3.253E-01 | 1.152E-02 |
| ACOX2      | 0.331 | 2.004E-01 | 3.140E-02 |
| ANTXR1     | 0.331 | 7.464E-02 | 3.980E-06 |
| SPATA46    | 0.331 | 3.227E-01 | 4.089E-03 |
| DPRX       | 0.331 | 6.721E-01 | 5.594E-02 |
| ENPP4      | 0.331 | 7.519E-02 | 9.504E-04 |
| WNT4       | 0.331 | 2.312E-01 | 8.180E-05 |
| PROSER2    | 0.330 | 1.054E-01 | 2.371E-01 |
| TNFAIP6    | 0.330 | 2.640E-01 | 1.584E-04 |
| HRASLS2    | 0.330 | 4.569E-01 | 6.093E-01 |
| DPYSL3     | 0.330 | 2.120E-01 | 2.214E-03 |
| PIH1D3     | 0.329 | 5.984E-01 | 2.025E-02 |
| WNT6       | 0.329 | 3.903E-01 | 1.727E-01 |
| TRIM6      | 0.329 | 1.483E-01 | 9.340E-06 |
| PLP1       | 0.329 | 4.521E-01 | 1.184E-01 |
| DRP2       | 0.329 | 1.615E-01 | 9.597E-03 |
| SYNDIG1    | 0.329 | 3.874E-01 | 3.351E-03 |
| KRTAP9-1   | 0.329 | 6.413E-01 | 4.012E-03 |
| HIST1H2AD  | 0.329 | 1.922E-01 | 6.102E-02 |
| PRR32      | 0.328 | 7.918E-01 | 2.273E-01 |
| TSC22D3    | 0.328 | 3.885E-02 | 6.180E-07 |
| SH3BGR     | 0.328 | 3.326E-02 | 1.852E-01 |
| CHRNA3     | 0.328 | 1.662E-01 | 3.565E-02 |
| HTRA1      | 0.328 | 1.149E-01 | 8.453E-04 |
| SLC35A2    | 0.328 | 2.082E-04 | 1.508E-01 |
| TTYH1      | 0.327 | 1.782E-01 | 3.374E-02 |
| PPFIA3     | 0.327 | 4.569E-02 | 4.471E-01 |
| CCDC110    | 0.327 | 2.225E-01 | 3.862E-02 |
| NPM2       | 0.327 | 2.551E-01 | 5.917E-01 |
| CTNNA1     | 0.327 | 9.856E-02 | 1.097E-02 |

|            |       |           |           |
|------------|-------|-----------|-----------|
| NCEH1      | 0.327 | 3.450E-02 | 2.723E-02 |
| PGR        | 0.327 | 2.195E-01 | 4.287E-01 |
| TAF7L      | 0.327 | 3.118E-01 | 5.487E-01 |
| CLIP3      | 0.326 | 1.903E-01 | 9.904E-02 |
| ELOVL5     | 0.326 | 1.753E-02 | 4.244E-04 |
| MYH3       | 0.326 | 1.794E-01 | 1.425E-02 |
| B4GALT1    | 0.326 | 2.341E-03 | 5.235E-01 |
| DAO        | 0.326 | 4.928E-01 | 1.201E-01 |
| MELTF      | 0.326 | 3.175E-01 | 2.478E-01 |
| HMOX1      | 0.326 | 1.760E-01 | 4.908E-02 |
| MOV10L1    | 0.326 | 2.118E-01 | 1.052E-03 |
| CACNB2     | 0.325 | 1.738E-01 | 3.205E-03 |
| DPP4       | 0.325 | 3.221E-01 | 4.766E-02 |
| LAMA3      | 0.325 | 4.256E-01 | 1.443E-03 |
| KANK2      | 0.325 | 5.073E-02 | 8.669E-02 |
| KLF8       | 0.325 | 1.491E-01 | 2.567E-01 |
| LZTFL1     | 0.325 | 1.897E-03 | 2.205E-04 |
| KRTAP4-1   | 0.325 | 2.448E-01 | 6.280E-05 |
| RCAN2      | 0.325 | 1.297E-01 | 2.718E-01 |
| ADAMTS17   | 0.325 | 2.019E-01 | 4.758E-03 |
| TMIE       | 0.324 | 1.592E-01 | 1.417E-01 |
| RGR        | 0.324 | 6.708E-01 | 1.470E-02 |
| EFCC1      | 0.324 | 1.512E-01 | 3.137E-01 |
| TGFB3      | 0.324 | 1.629E-01 | 2.497E-04 |
| FBXO24     | 0.323 | 1.420E-02 | 2.880E-06 |
| IL17D      | 0.323 | 1.152E-01 | 1.001E-01 |
| PPM1H      | 0.323 | 1.984E-01 | 4.720E-03 |
| SPECC1     | 0.323 | 1.160E-01 | 4.597E-01 |
| AC004233.2 | 0.323 | 4.634E-01 | 3.107E-02 |
| RGS10      | 0.323 | 3.375E-02 | 4.013E-04 |
| ZNF99      | 0.323 | 5.346E-01 | 5.551E-03 |
| SCD        | 0.322 | 1.732E-01 | 3.715E-02 |
| HHIPL1     | 0.322 | 1.523E-01 | 5.679E-01 |
| XKR3       | 0.322 | 6.278E-01 | 2.721E-03 |
| CFAP58     | 0.322 | 1.076E-01 | 2.612E-02 |
| DIO1       | 0.322 | 3.548E-01 | 1.425E-01 |
| OVOL3      | 0.322 | 7.433E-02 | 3.771E-01 |
| RDM1       | 0.322 | 1.252E-01 | 4.877E-02 |
| KLHL35     | 0.321 | 1.603E-01 | 2.343E-01 |
| CAVIN1     | 0.321 | 1.384E-01 | 1.312E-02 |
| CLDN5      | 0.321 | 1.728E-01 | 1.339E-02 |
| AP001458.2 | 0.321 | NA        | 1.402E-02 |
| ZSCAN10    | 0.321 | 5.163E-01 | 1.718E-03 |
| CAVIN2     | 0.321 | 2.482E-01 | 8.266E-01 |
| SLC5A6     | 0.321 | 1.736E-02 | 2.274E-01 |
| PSMD8      | 0.320 | 1.695E-04 | 6.592E-02 |
| HTR6       | 0.320 | 3.292E-01 | 1.100E-03 |
| DAAM2      | 0.320 | 1.174E-01 | 2.088E-01 |
| ARHGAP28   | 0.320 | 2.149E-01 | 5.950E-05 |
| EMP1       | 0.320 | 1.339E-01 | 8.056E-02 |

|            |       |           |           |
|------------|-------|-----------|-----------|
| UGT2B7     | 0.320 | 5.998E-01 | 4.529E-02 |
| TRIM64B    | 0.320 | NA        | 4.316E-01 |
| COL1A2     | 0.320 | 2.536E-01 | 1.756E-02 |
| UFSP1      | 0.320 | 2.051E-02 | 2.090E-05 |
| ARHGEF26   | 0.319 | 1.394E-01 | 4.119E-01 |
| ABHD4      | 0.319 | 5.670E-03 | 1.062E-01 |
| C1QTNF2    | 0.319 | 1.342E-01 | 1.071E-03 |
| ADGRA2     | 0.319 | 1.283E-01 | 3.920E-02 |
| LAMC2      | 0.319 | 3.548E-01 | 1.247E-01 |
| CNPY4      | 0.318 | 2.985E-03 | 4.392E-01 |
| GREM2      | 0.318 | 4.646E-01 | 3.217E-02 |
| MROH9      | 0.318 | 4.588E-01 | 3.570E-08 |
| AP004243.1 | 0.318 | NA        | 1.852E-02 |
| DCSTAMP    | 0.318 | 4.420E-01 | 5.675E-01 |
| ANGPTL5    | 0.318 | 5.293E-01 | 9.270E-05 |
| MEST       | 0.318 | 2.440E-01 | 1.560E-01 |
| ARID3A     | 0.317 | 2.439E-01 | 1.042E-01 |
| TLCD1      | 0.317 | 4.750E-02 | 6.512E-03 |
| SRGAP2C    | 0.317 | 3.441E-04 | 1.257E-01 |
| OR52N4     | 0.317 | 4.607E-01 | 6.460E-03 |
| MIR6740    | 0.317 | 3.914E-01 | 1.780E-03 |
| ANKFN1     | 0.317 | 5.208E-01 | 5.037E-02 |
| PLPBP      | 0.316 | 1.442E-02 | 7.316E-02 |
| PMEPA1     | 0.316 | 2.013E-01 | 1.717E-01 |
| SORCS1     | 0.316 | 4.770E-01 | 3.433E-02 |
| RTN3       | 0.315 | 1.898E-03 | 2.059E-04 |
| PAX1       | 0.315 | 6.743E-01 | 1.897E-01 |
| CALML6     | 0.315 | 2.444E-01 | 2.790E-05 |
| IFNA21     | 0.315 | NA        | 9.612E-03 |
| GRXCR2     | 0.315 | NA        | 6.291E-04 |
| HIST1H2BC  | 0.315 | 2.197E-01 | 1.962E-02 |
| FO681492.1 | 0.314 | 2.582E-01 | 3.247E-01 |
| STC1       | 0.314 | 1.906E-01 | 5.560E-03 |
| TIAM1      | 0.314 | 5.317E-02 | 4.780E-02 |
| SPTSSB     | 0.314 | 4.242E-01 | 2.861E-01 |
| HMCN1      | 0.314 | 2.359E-01 | 6.657E-02 |
| OR5M1      | 0.314 | NA        | 7.743E-02 |
| HIST1H2BN  | 0.314 | 1.330E-01 | 2.114E-02 |
| ITLN2      | 0.313 | 5.577E-01 | 1.248E-04 |
| GPR137B    | 0.313 | 4.273E-03 | 2.059E-02 |
| ZNF365     | 0.313 | 3.567E-01 | 1.374E-02 |
| RAB9B      | 0.313 | 1.899E-01 | 3.110E-02 |
| DNAH12     | 0.313 | 1.419E-01 | 1.752E-02 |
| METTL7B    | 0.313 | 3.464E-01 | 6.068E-04 |
| OPN5       | 0.312 | 5.633E-01 | 3.032E-02 |
| VEGFC      | 0.312 | 1.881E-01 | 1.942E-01 |
| SPESP1     | 0.312 | 4.641E-01 | 4.140E-02 |
| AL355102.2 | 0.312 | 4.526E-01 | 2.512E-02 |
| IDI2       | 0.312 | 5.194E-01 | 2.118E-02 |
| PTGER2     | 0.312 | 1.901E-01 | 4.296E-02 |

|            |       |           |           |
|------------|-------|-----------|-----------|
| CCDC177    | 0.311 | 4.607E-01 | 1.271E-01 |
| HIST1H2BF  | 0.311 | 3.216E-01 | 2.911E-01 |
| ACSM3      | 0.311 | 2.917E-01 | 1.338E-01 |
| EDN1       | 0.311 | 2.252E-01 | 1.892E-02 |
| BIRC7      | 0.311 | 3.736E-01 | 5.621E-04 |
| AC011530.1 | 0.311 | 4.250E-01 | 1.120E-05 |
| KIAA0408   | 0.311 | 5.559E-01 | 7.006E-03 |
| CT62       | 0.310 | 4.669E-01 | 1.218E-01 |
| PLAC9      | 0.310 | 2.207E-01 | 4.586E-02 |
| SOBP       | 0.310 | 1.862E-01 | 3.842E-01 |
| CACNA1H    | 0.309 | 2.497E-01 | 5.941E-04 |
| SYNGR1     | 0.309 | 1.560E-01 | 1.649E-01 |
| MIR593     | 0.309 | 3.202E-01 | 2.021E-01 |
| PAQR4      | 0.309 | 4.553E-02 | 1.154E-01 |
| ADAMTS9    | 0.309 | 1.249E-01 | 9.525E-02 |
| CROCC2     | 0.309 | 4.098E-01 | 7.503E-02 |
| SH3KBP1    | 0.309 | 9.202E-02 | 4.362E-01 |
| C4orf17    | 0.308 | 7.426E-01 | 2.520E-02 |
| SYP        | 0.308 | 1.396E-01 | 5.368E-02 |
| AC131097.2 | 0.308 | 4.521E-01 | 6.515E-02 |
| CLIC4      | 0.308 | 9.521E-02 | 2.222E-01 |
| HIST1H2AG  | 0.308 | 1.613E-01 | 5.727E-02 |
| TLX3       | 0.308 | 6.609E-01 | 2.393E-03 |
| HERC3      | 0.308 | 3.245E-02 | 4.545E-03 |
| SDS        | 0.308 | 2.041E-01 | 6.330E-01 |
| SMCO2      | 0.308 | 1.933E-01 | 1.673E-04 |
| HIST1H2BJ  | 0.307 | 2.357E-01 | 4.100E-02 |
| AMPD1      | 0.307 | 4.735E-01 | 1.575E-02 |
| CCL21      | 0.307 | 5.348E-01 | 8.352E-01 |
| UPK2       | 0.307 | 5.241E-01 | 5.778E-02 |
| CHRNB1     | 0.306 | 5.670E-02 | 1.034E-01 |
| PTRH1      | 0.306 | 1.378E-01 | 1.748E-03 |
| F8         | 0.306 | 4.838E-02 | 3.781E-02 |
| AKAP3      | 0.306 | 1.075E-01 | 1.091E-01 |
| AOC3       | 0.306 | 2.435E-01 | 2.678E-02 |
| ITIH5      | 0.306 | 2.393E-01 | 3.549E-02 |
| MAP6       | 0.306 | 2.473E-01 | 5.838E-02 |
| FIGLA      | 0.306 | 6.663E-01 | 1.313E-02 |
| GRIN3B     | 0.305 | 2.357E-01 | 2.845E-03 |
| PLS3       | 0.305 | 2.740E-02 | 1.070E-02 |
| ZNF385C    | 0.305 | 1.371E-01 | 4.890E-07 |
| AK7        | 0.305 | 2.543E-01 | 6.795E-03 |
| SCN7A      | 0.304 | 5.367E-01 | 4.359E-02 |
| NXPH3      | 0.304 | 2.937E-01 | 7.782E-03 |
| GADD45G    | 0.304 | 1.435E-01 | 7.480E-02 |
| SVIL       | 0.304 | 5.149E-02 | 6.398E-02 |
| SYNGR3     | 0.304 | 3.117E-01 | 2.325E-01 |
| FLNA       | 0.304 | 1.592E-01 | 2.108E-02 |
| SLC52A3    | 0.303 | 1.073E-01 | 4.292E-01 |
| PEPD       | 0.303 | 1.682E-03 | 3.018E-02 |

|             |       |           |           |
|-------------|-------|-----------|-----------|
| MPZL3       | 0.303 | 1.205E-02 | 9.410E-02 |
| LGALS16     | 0.303 | NA        | 4.014E-01 |
| HFM1        | 0.303 | 3.766E-01 | 1.040E-03 |
| ENTHD1      | 0.303 | 4.040E-01 | 4.635E-01 |
| MYH10       | 0.303 | 2.551E-02 | 1.552E-02 |
| AQP1        | 0.303 | 9.639E-02 | 2.333E-01 |
| SHGAP19-SL1 | 0.303 | 5.685E-01 | 1.227E-01 |
| PCDHGB3     | 0.303 | 2.548E-01 | 3.081E-02 |
| CPPED1      | 0.303 | 1.494E-01 | 2.202E-01 |
| GPC5        | 0.302 | 5.047E-01 | 1.039E-01 |
| UXS1        | 0.302 | 4.243E-03 | 5.859E-02 |
| NT5DC3      | 0.302 | 3.999E-02 | 3.349E-01 |
| PCDHB7      | 0.302 | 2.418E-01 | 1.330E-02 |
| SSC4D       | 0.302 | 8.951E-02 | 1.018E-02 |
| CSF2RB      | 0.302 | 2.838E-01 | 2.800E-02 |
| DGKB        | 0.301 | 5.246E-01 | 2.630E-06 |
| ARHGAP36    | 0.301 | 6.860E-01 | 1.693E-01 |
| WFDC1       | 0.301 | 2.053E-01 | 2.814E-02 |
| CMTM8       | 0.301 | 7.644E-02 | 3.535E-04 |
| COL3A1      | 0.301 | 3.084E-01 | 6.216E-03 |
| CELA2A      | 0.301 | 3.538E-01 | 1.636E-01 |
| SRGAP2B     | 0.301 | 1.186E-02 | 4.582E-02 |
| GLIS2       | 0.301 | 1.289E-01 | 4.136E-03 |
| CXCL3       | 0.300 | 4.120E-01 | 3.931E-02 |
| TMEM52B     | 0.300 | 4.633E-01 | 1.100E-01 |
| RASSF8      | 0.300 | 1.016E-01 | 1.840E-05 |
| FLRT3       | 0.300 | 3.219E-01 | 6.497E-01 |
| GPR160      | 0.300 | 2.357E-01 | 1.453E-01 |
| MSGALNACT   | 0.300 | 5.387E-02 | 2.756E-03 |
| SLC30A4     | 0.300 | 9.760E-02 | 1.414E-01 |
| RNASE13     | 0.300 | 4.563E-01 | 3.855E-02 |
| SULF1       | 0.299 | 3.499E-01 | 5.816E-04 |
| CYTH3       | 0.299 | 1.690E-02 | 7.399E-01 |
| LPAR4       | 0.299 | 2.480E-01 | 1.236E-01 |
| TNC         | 0.298 | 3.796E-01 | 1.255E-02 |
| JDP2        | 0.298 | 7.389E-02 | 3.866E-02 |
| ZNF479      | 0.298 | 8.383E-01 | 2.839E-02 |
| IGSF23      | 0.298 | 4.461E-01 | 2.197E-01 |
| CLCN1       | 0.298 | 3.338E-01 | 3.951E-01 |
| TMPRSS13    | 0.298 | 3.889E-01 | 7.341E-04 |
| COL22A1     | 0.298 | 4.747E-01 | 5.708E-01 |
| NFIB        | 0.298 | 8.837E-02 | 8.142E-01 |
| GPR87       | 0.298 | 2.007E-01 | 6.008E-01 |
| STBD1       | 0.298 | 2.889E-02 | 5.085E-01 |
| CYBRD1      | 0.297 | 1.731E-01 | 3.223E-03 |
| EGR4        | 0.297 | 3.918E-01 | 6.865E-01 |
| H2BFWT      | 0.297 | 6.211E-01 | 1.020E-06 |
| PRDM14      | 0.297 | NA        | 1.660E-02 |
| LGI1        | 0.297 | 6.088E-01 | 3.261E-02 |
| SLCO3A1     | 0.297 | 1.285E-01 | 5.495E-02 |

|            |       |           |           |
|------------|-------|-----------|-----------|
| KCNH2      | 0.297 | 3.972E-01 | 4.208E-02 |
| PPBP       | 0.297 | 5.299E-01 | 3.092E-03 |
| SMIM5      | 0.297 | 3.392E-01 | 1.012E-01 |
| TWSG1      | 0.296 | 2.958E-02 | 5.446E-01 |
| HAP1       | 0.296 | 3.558E-01 | 2.635E-02 |
| TYRP1      | 0.296 | 4.675E-01 | 1.689E-01 |
| TXK        | 0.296 | 2.038E-01 | 1.077E-01 |
| RCN1       | 0.296 | 1.569E-02 | 6.140E-04 |
| ANKS1A     | 0.296 | 4.300E-02 | 4.564E-02 |
| FBLN5      | 0.295 | 1.664E-01 | 1.329E-01 |
| SLC6A9     | 0.295 | 9.259E-02 | 4.751E-01 |
| ATP10A     | 0.295 | 2.143E-01 | 1.174E-01 |
| PALLD      | 0.295 | 1.470E-01 | 2.792E-01 |
| SPRED3     | 0.295 | 8.172E-02 | 7.159E-03 |
| SPARC      | 0.295 | 1.586E-01 | 3.246E-01 |
| DHTKD1     | 0.295 | 9.196E-03 | 4.085E-02 |
| AC004076.1 | 0.295 | 2.338E-01 | 8.348E-02 |
| OXCT2      | 0.295 | 1.964E-01 | 2.699E-01 |
| RTN4RL1    | 0.294 | 4.652E-01 | 2.814E-01 |
| GFPT1      | 0.294 | 2.931E-03 | 1.456E-02 |
| FAM129B    | 0.294 | 1.140E-02 | 8.286E-04 |
| MYH4       | 0.294 | 5.633E-01 | 5.002E-02 |
| GHR        | 0.294 | 3.047E-01 | 3.603E-01 |
| APOC3      | 0.294 | 8.265E-01 | 5.180E-01 |
| FMO1       | 0.294 | 3.443E-01 | 6.082E-03 |
| CTSK       | 0.294 | 2.510E-01 | 5.133E-01 |
| FILIP1L    | 0.294 | 1.916E-01 | 6.782E-01 |
| MIR3944    | 0.294 | 5.965E-01 | 9.120E-02 |
| FGFR4      | 0.293 | 2.819E-01 | 1.369E-01 |
| PCLO       | 0.293 | 3.235E-01 | 1.207E-02 |
| SMKR1      | 0.293 | 3.221E-01 | 2.994E-01 |
| MIR3197    | 0.293 | 5.426E-01 | 1.491E-01 |
| SOX17      | 0.293 | 1.489E-01 | 7.991E-02 |
| LRRC10B    | 0.293 | 2.763E-01 | 6.618E-02 |
| RAB3IL1    | 0.293 | 1.954E-01 | 1.040E-05 |
| AC139530.2 | 0.293 | 4.247E-01 | 6.231E-03 |
| KAT2B      | 0.293 | 3.647E-02 | 1.538E-01 |
| GALR3      | 0.292 | 4.433E-01 | 2.687E-01 |
| MIR548I1   | 0.292 | NA        | 2.603E-01 |
| DDX43      | 0.292 | 4.657E-01 | 1.620E-02 |
| TRIB3      | 0.292 | 1.177E-01 | 2.102E-01 |
| HAMP       | 0.292 | 3.430E-01 | 3.730E-02 |
| GUCY1A3    | 0.292 | 1.538E-01 | 1.392E-04 |
| COL16A1    | 0.291 | 2.550E-01 | 3.980E-02 |
| FAM107B    | 0.291 | 7.285E-02 | 1.746E-04 |
| ATP6V0E2   | 0.291 | 9.619E-02 | 5.049E-02 |
| ANXA6      | 0.291 | 2.023E-01 | 1.373E-01 |
| VWA3B      | 0.291 | 3.194E-01 | 1.763E-02 |
| CGREF1     | 0.291 | 3.708E-01 | 1.069E-01 |
| MIR548AT   | 0.291 | NA        | 1.473E-01 |

|            |       |           |           |
|------------|-------|-----------|-----------|
| TMEM52     | 0.291 | 3.080E-01 | 1.550E-02 |
| MAGI1      | 0.291 | 1.152E-01 | 3.160E-05 |
| AP002373.1 | 0.290 | 4.905E-01 | 6.409E-01 |
| MYOCD      | 0.290 | 4.577E-01 | 2.825E-02 |
| SLC17A3    | 0.290 | 7.397E-01 | 4.103E-02 |
| NFKBIB     | 0.290 | 3.822E-03 | 5.450E-02 |
| PRKAG2     | 0.290 | 8.478E-03 | 7.450E-03 |
| PGK2       | 0.290 | 4.968E-01 | 4.276E-02 |
| MFGE8      | 0.290 | 1.205E-01 | 8.331E-02 |
| PKIG       | 0.290 | 6.672E-02 | 5.604E-04 |
| IDH2       | 0.290 | 5.710E-03 | 2.360E-03 |
| CFHR1      | 0.290 | 6.298E-01 | 4.777E-02 |
| FSTL1      | 0.289 | 9.695E-02 | 4.214E-01 |
| REXO2      | 0.289 | 1.697E-03 | 1.530E-02 |
| FANCD2OS   | 0.289 | 2.438E-01 | 1.987E-01 |
| EXTL1      | 0.289 | 2.463E-01 | 2.980E-03 |
| AM47E-STBI | 0.289 | 4.260E-01 | 2.859E-02 |
| PAMR1      | 0.289 | 1.623E-01 | 3.211E-01 |
| SGIP1      | 0.289 | 1.891E-01 | 1.356E-01 |
| PDZK1IP1   | 0.289 | 5.246E-01 | 3.445E-02 |
| SCN8A      | 0.289 | 3.506E-01 | 2.213E-01 |
| COX6A2     | 0.288 | 6.931E-01 | 3.508E-02 |
| TSPAN15    | 0.288 | 5.929E-02 | 1.845E-01 |
| TMEM79     | 0.288 | 5.331E-02 | 1.418E-01 |
| SCARA3     | 0.288 | 2.623E-01 | 1.463E-01 |
| LDOC1      | 0.288 | 3.042E-01 | 3.076E-01 |
| ADAM12     | 0.288 | 2.987E-01 | 2.362E-01 |
| TMEM132B   | 0.288 | 3.003E-01 | 3.570E-02 |
| ARMCX2     | 0.288 | 1.757E-01 | 1.927E-02 |
| CCDC3      | 0.288 | 1.366E-01 | 6.813E-01 |
| MGAT5B     | 0.287 | 4.006E-01 | 1.281E-03 |
| AL713999.1 | 0.287 | NA        | 1.249E-02 |
| GRIN2C     | 0.287 | 2.074E-01 | 3.058E-02 |
| CPED1      | 0.287 | 2.843E-01 | 1.530E-01 |
| GLRB       | 0.287 | 3.339E-01 | 7.560E-05 |
| HIST1H2AE  | 0.287 | 3.208E-01 | 1.964E-02 |
| CCDC169    | 0.287 | 2.917E-01 | 2.266E-01 |
| IRF5       | 0.287 | 8.486E-02 | 2.429E-02 |
| PPP1R15A   | 0.286 | 3.578E-02 | 7.318E-03 |
| WDR31      | 0.286 | 2.017E-02 | 1.130E-03 |
| EBF1       | 0.286 | 1.961E-01 | 8.906E-02 |
| OLFML1     | 0.286 | 1.789E-01 | 1.208E-01 |
| HIGD1C     | 0.286 | 5.003E-01 | 8.115E-02 |
| SLC39A7    | 0.286 | 1.156E-03 | 5.847E-03 |
| TCEAL3     | 0.285 | 2.703E-02 | 3.934E-01 |
| STMN3      | 0.285 | 2.551E-01 | 4.775E-03 |
| MPP7       | 0.285 | 1.132E-01 | 4.194E-02 |
| ACOX3      | 0.285 | 2.322E-02 | 6.831E-01 |
| ADAMTS4    | 0.285 | 2.388E-01 | 1.436E-02 |
| ADPRH      | 0.285 | 6.965E-02 | 1.628E-01 |



|            |       |           |           |
|------------|-------|-----------|-----------|
| POMC       | 0.285 | 3.472E-01 | 4.558E-02 |
| PIGM       | 0.285 | 2.017E-02 | 7.758E-04 |
| HEYL       | 0.285 | 1.212E-01 | 1.386E-01 |
| GFPT2      | 0.285 | 4.197E-01 | 2.690E-01 |
| DKK3       | 0.285 | 1.469E-01 | 2.448E-02 |
| MEIG1      | 0.284 | 2.013E-01 | 6.752E-02 |
| MAGEH1     | 0.284 | 6.625E-02 | 1.185E-01 |
| UBL3       | 0.284 | 3.205E-02 | 2.658E-01 |
| GPRASP1    | 0.284 | 1.688E-01 | 8.393E-02 |
| KRT78      | 0.284 | 4.889E-01 | 5.251E-02 |
| NKX2-4     | 0.284 | NA        | 1.527E-02 |
| APBB1      | 0.284 | 1.954E-01 | 4.445E-03 |
| PRG4       | 0.284 | 2.520E-01 | 2.778E-02 |
| PTGES3L    | 0.283 | 1.255E-01 | 5.741E-01 |
| DAPK1      | 0.283 | 2.116E-01 | 6.913E-01 |
| FBXL7      | 0.283 | 1.693E-01 | 5.860E-05 |
| STOX1      | 0.283 | 2.219E-01 | 4.449E-03 |
| AGT        | 0.282 | 3.920E-01 | 9.018E-02 |
| KIAA1211L  | 0.282 | 1.609E-01 | 1.111E-01 |
| ST6GALNAC  | 0.282 | 4.115E-01 | 6.206E-01 |
| PTGER1     | 0.282 | 2.934E-01 | 2.350E-02 |
| BCL9L      | 0.282 | 4.462E-02 | 2.005E-03 |
| SPEF1      | 0.282 | 2.890E-01 | 5.621E-03 |
| DPYSL2     | 0.282 | 1.070E-01 | 1.891E-02 |
| KLF11      | 0.281 | 3.362E-02 | 1.810E-01 |
| EFEMP2     | 0.281 | 1.432E-01 | 2.117E-01 |
| SVOPL      | 0.281 | 3.375E-01 | 7.159E-03 |
| CDH15      | 0.281 | 3.793E-01 | 4.412E-01 |
| MAGEA2     | 0.281 | 7.046E-01 | 2.035E-01 |
| SIGLEC8    | 0.281 | 4.302E-01 | 1.532E-01 |
| COL5A2     | 0.281 | 2.735E-01 | 6.095E-01 |
| MIR203A    | 0.281 | 6.311E-01 | 4.246E-02 |
| ADIRF      | 0.281 | NA        | 4.112E-01 |
| HSPB3      | 0.281 | 6.198E-01 | 1.803E-03 |
| FOXL2NB    | 0.281 | 6.001E-01 | 3.613E-02 |
| MLIP       | 0.280 | 5.184E-01 | 7.348E-02 |
| DSCR8      | 0.280 | 7.892E-01 | 9.256E-03 |
| HDGFL1     | 0.280 | 5.915E-01 | 1.549E-01 |
| ACOX1      | 0.280 | 1.118E-01 | 1.526E-01 |
| AL645922.1 | 0.280 | 7.408E-01 | 2.533E-02 |
| MEOX2      | 0.280 | 4.840E-01 | 5.309E-04 |
| HACD4      | 0.280 | 1.637E-01 | 4.540E-05 |
| THY1       | 0.279 | 2.081E-01 | 1.899E-01 |
| PLPP7      | 0.279 | 3.054E-01 | 3.101E-01 |
| UCN        | 0.279 | 2.194E-01 | 5.764E-02 |
| C1orf115   | 0.279 | 2.329E-01 | 1.448E-02 |
| PLA2G2C    | 0.279 | 5.312E-01 | 9.360E-03 |
| XAGE2      | 0.279 | 8.084E-01 | 1.452E-01 |
| AC091551.1 | 0.279 | 4.261E-01 | 3.032E-01 |
| PGM2L1     | 0.279 | 8.970E-02 | 1.082E-02 |

|            |       |           |           |
|------------|-------|-----------|-----------|
| ACAT1      | 0.279 | 4.226E-02 | 8.257E-01 |
| AL359736.1 | 0.279 | 6.413E-01 | 6.311E-02 |
| AC090227.1 | 0.279 | NA        | 5.745E-01 |
| ATF6       | 0.279 | 1.975E-03 | 3.830E-01 |
| STMN1      | 0.279 | 6.666E-02 | 3.622E-01 |
| ADAMTSL3   | 0.278 | 4.080E-01 | 6.518E-01 |
| PCDHA2     | 0.278 | 6.048E-01 | 6.428E-02 |
| DEFB4B     | 0.278 | NA        | 5.987E-02 |
| BTBD19     | 0.278 | 1.277E-01 | 7.820E-02 |
| ITSN2      | 0.278 | 1.584E-02 | 2.104E-02 |
| HIST1H3E   | 0.278 | 2.478E-01 | 1.106E-01 |
| TMEM187    | 0.277 | 1.186E-02 | 3.718E-02 |
| MEIOB      | 0.277 | 4.953E-01 | 3.353E-01 |
| AC022826.2 | 0.277 | NA        | 1.011E-02 |
| ACBD7      | 0.277 | 3.178E-01 | 5.140E-05 |
| OPHN1      | 0.277 | 2.750E-02 | 8.804E-02 |
| HRG        | 0.277 | 6.826E-01 | 2.933E-02 |
| LRRC43     | 0.277 | 1.978E-01 | 1.261E-01 |
| RETSAT     | 0.277 | 4.281E-03 | 1.889E-01 |
| IDI1       | 0.277 | 1.341E-02 | 4.696E-02 |
| ASAP2      | 0.277 | 1.107E-01 | 5.257E-02 |
| ANKRD34C   | 0.276 | 6.722E-01 | 3.997E-03 |
| TCF15      | 0.276 | 4.234E-01 | 4.767E-03 |
| FRMD7      | 0.276 | 5.805E-01 | 1.516E-02 |
| TAS2R1     | 0.276 | 7.214E-01 | 3.915E-02 |
| MME        | 0.276 | 4.218E-01 | 4.421E-02 |
| FAM219A    | 0.276 | 4.921E-03 | 6.988E-04 |
| GLB1L2     | 0.276 | 3.914E-01 | 4.065E-02 |
| DMRTB1     | 0.276 | 8.141E-01 | 2.237E-01 |
| DOPEY2     | 0.276 | 5.051E-02 | 2.837E-02 |
| AC010327.1 | 0.275 | NA        | 6.958E-04 |
| SLC19A2    | 0.275 | 9.425E-02 | 8.085E-02 |
| AC112229.3 | 0.275 | 3.056E-01 | 6.290E-02 |
| LY6G6D     | 0.275 | 7.446E-01 | 2.500E-02 |
| AC008758.6 | 0.275 | 2.396E-01 | 2.795E-01 |
| CACNG8     | 0.275 | 4.358E-01 | 2.636E-02 |
| CLLU1OS    | 0.275 | 6.401E-01 | 4.200E-02 |
| ELAVL2     | 0.275 | 5.710E-01 | 9.177E-02 |
| SORT1      | 0.275 | 3.818E-02 | 9.093E-01 |
| PANX3      | 0.275 | 7.488E-01 | 6.936E-02 |
| AC008770.2 | 0.275 | 3.689E-01 | 3.671E-02 |
| CPNE9      | 0.275 | 2.764E-01 | 3.039E-01 |
| VENTX      | 0.275 | 3.303E-01 | 2.974E-02 |
| TMEM255B   | 0.274 | 6.893E-02 | 2.408E-04 |
| PVR        | 0.274 | 3.815E-02 | 7.490E-05 |
| TCTEX1D1   | 0.274 | 2.349E-01 | 3.972E-04 |
| JAM2       | 0.274 | 1.940E-01 | 5.449E-03 |
| AC020914.1 | 0.273 | NA        | 3.320E-06 |
| JCHAIN     | 0.273 | 5.013E-01 | 4.919E-02 |
| TAF1B      | 0.273 | 3.822E-03 | 5.730E-01 |

|            |       |           |           |
|------------|-------|-----------|-----------|
| CYP2S1     | 0.273 | 4.555E-01 | 5.202E-03 |
| KIF6       | 0.273 | 3.793E-01 | 1.960E-02 |
| ULK2       | 0.273 | 3.326E-02 | 3.736E-01 |
| THBS1      | 0.273 | 2.449E-01 | 1.408E-02 |
| PIRT       | 0.273 | 6.824E-01 | 1.083E-01 |
| ACSM5      | 0.273 | 3.660E-01 | 5.548E-03 |
| FBXO3      | 0.272 | 2.228E-03 | 1.017E-02 |
| RERGL      | 0.272 | 5.325E-01 | 3.429E-02 |
| EPHB3      | 0.272 | 2.440E-01 | 1.068E-03 |
| TNNC1      | 0.272 | 5.076E-01 | 2.635E-01 |
| C12orf75   | 0.272 | 3.413E-01 | 3.685E-04 |
| DHCR7      | 0.272 | 4.172E-02 | 3.619E-01 |
| ADAMTS16   | 0.272 | 4.640E-01 | 7.900E-05 |
| MAT1A      | 0.272 | 5.131E-01 | 8.269E-02 |
| FAM69C     | 0.272 | 5.691E-01 | 4.827E-02 |
| ABCC9      | 0.271 | 2.766E-01 | 1.178E-01 |
| MAPT       | 0.271 | 3.839E-01 | 7.439E-03 |
| MIR3143    | 0.271 | NA        | 6.344E-01 |
| THSD4      | 0.271 | 1.500E-01 | 3.508E-03 |
| MIR548H1   | 0.271 | NA        | 2.023E-01 |
| ZNF385D    | 0.271 | 3.966E-01 | 3.238E-02 |
| ADCK2      | 0.271 | 1.494E-03 | 1.241E-01 |
| NPY4R      | 0.271 | 5.412E-01 | 4.138E-03 |
| SAMD11     | 0.271 | 3.446E-01 | 2.646E-01 |
| OR8D1      | 0.271 | 7.709E-01 | 5.330E-04 |
| ATP6V0D2   | 0.270 | 3.996E-01 | 5.215E-03 |
| C1QTNF9    | 0.270 | 5.380E-01 | 1.085E-01 |
| SGMS2      | 0.270 | 1.380E-01 | 5.221E-02 |
| VWA3A      | 0.270 | 3.696E-01 | 2.266E-02 |
| PBX1       | 0.270 | 1.390E-01 | 1.531E-01 |
| WASF3      | 0.269 | 1.906E-01 | 8.726E-02 |
| MAN1A1     | 0.269 | 1.444E-01 | 3.917E-01 |
| RAB23      | 0.269 | 1.742E-01 | 1.459E-01 |
| CHRDL1     | 0.269 | 6.252E-01 | 9.824E-02 |
| PRRX2      | 0.269 | 2.986E-01 | 3.059E-02 |
| TTC25      | 0.269 | 1.565E-01 | 2.344E-01 |
| PRR19      | 0.269 | 5.628E-02 | 1.021E-01 |
| AL591806.3 | 0.269 | 1.782E-01 | 2.557E-01 |
| CNTNAP1    | 0.268 | 1.190E-01 | 5.223E-04 |
| MORN3      | 0.268 | 3.332E-01 | 4.388E-01 |
| EPHA7      | 0.268 | 4.715E-01 | 3.006E-01 |
| EID2B      | 0.268 | 1.118E-01 | 5.292E-02 |
| KIAA1958   | 0.268 | 3.983E-02 | 1.976E-02 |
| STXBP1     | 0.268 | 1.764E-01 | 1.311E-03 |
| ASGR1      | 0.268 | 2.016E-01 | 2.356E-01 |
| PLEKHD1    | 0.268 | 3.745E-01 | 3.040E-03 |
| FZD9       | 0.268 | 4.148E-01 | 3.018E-02 |
| ZNF467     | 0.267 | 1.714E-01 | 4.450E-03 |
| OPN1SW     | 0.267 | 3.477E-02 | 8.008E-02 |
| AC008687.4 | 0.267 | 3.345E-01 | 4.660E-04 |

|            |       |           |           |
|------------|-------|-----------|-----------|
| PTH1R      | 0.267 | 2.934E-01 | 3.345E-02 |
| ATL1       | 0.267 | 9.171E-02 | 2.712E-01 |
| TTLL9      | 0.267 | 2.754E-01 | 2.231E-01 |
| OSBP2      | 0.266 | 3.080E-01 | 3.501E-02 |
| CATIP      | 0.266 | 2.746E-01 | 6.753E-01 |
| ANO2       | 0.266 | 2.238E-01 | 1.212E-01 |
| FMO5       | 0.266 | 2.346E-01 | 2.260E-02 |
| TCHH       | 0.266 | 4.938E-01 | 2.108E-01 |
| MIR601     | 0.266 | 6.061E-01 | 1.421E-02 |
| CHRM5      | 0.266 | 3.460E-01 | 1.090E-01 |
| CLEC1A     | 0.266 | 1.627E-01 | 5.418E-02 |
| EFCAB9     | 0.266 | 6.582E-01 | 4.239E-02 |
| PRDM8      | 0.266 | 2.965E-01 | 7.730E-02 |
| TUBB8      | 0.266 | 4.053E-01 | 5.157E-01 |
| MAGEA2B    | 0.265 | 7.364E-01 | 5.903E-01 |
| HIST1H2BO  | 0.265 | 4.150E-01 | 5.411E-02 |
| MIR4701    | 0.265 | 3.482E-01 | 6.419E-01 |
| IL17RE     | 0.265 | 1.991E-01 | 1.951E-01 |
| VLDLR      | 0.265 | 1.940E-01 | 3.865E-01 |
| IFNA13     | 0.265 | NA        | 4.400E-05 |
| WIP1       | 0.265 | 1.286E-02 | 5.773E-03 |
| TUBB3      | 0.265 | 3.525E-01 | 7.604E-01 |
| SIRT2      | 0.265 | 2.078E-03 | 3.830E-01 |
| AL590560.1 | 0.265 | 6.048E-01 | 5.442E-02 |
| SH3TC2     | 0.265 | 2.483E-01 | 2.311E-02 |
| GPIHBP1    | 0.265 | 3.882E-01 | 1.568E-01 |
| KRBA2      | 0.265 | 2.479E-01 | 1.077E-03 |
| CAMK2N2    | 0.264 | 3.966E-01 | 7.236E-02 |
| PRR18      | 0.264 | 6.784E-01 | 3.331E-02 |
| MIR149     | 0.264 | 6.889E-01 | 5.309E-01 |
| VWA5A      | 0.264 | 2.243E-01 | 3.380E-01 |
| CFL2       | 0.264 | 1.560E-01 | 2.803E-02 |
| SLC12A8    | 0.264 | 1.584E-01 | 4.496E-02 |
| TUBA3D     | 0.264 | 2.648E-01 | 5.889E-02 |
| NFIX       | 0.264 | 1.187E-01 | 1.388E-02 |
| NPY1R      | 0.264 | 5.228E-01 | 5.883E-03 |
| FAM155A    | 0.264 | 3.558E-01 | 1.280E-01 |
| SLC25A43   | 0.264 | 7.609E-02 | 1.377E-01 |
| CPS1       | 0.264 | 4.667E-01 | 7.665E-02 |
| PILRB      | 0.264 | 2.109E-01 | 3.535E-04 |
| METRNL     | 0.264 | 2.253E-01 | 4.048E-02 |
| CD5L       | 0.264 | 6.543E-01 | 1.933E-02 |
| NRGN       | 0.264 | 1.298E-01 | 5.538E-02 |
| PTP4A3     | 0.263 | 1.195E-01 | 1.324E-01 |
| FAM110D    | 0.263 | 1.867E-01 | 3.142E-01 |
| MATN3      | 0.263 | 2.244E-01 | 5.290E-01 |
| FOXS1      | 0.263 | 2.155E-01 | 4.182E-02 |
| CAP2       | 0.263 | 2.154E-01 | 6.467E-01 |
| LONRF2     | 0.263 | 5.455E-01 | 2.150E-01 |
| PCDHA3     | 0.263 | 5.316E-01 | 7.117E-02 |

|           |       |           |           |
|-----------|-------|-----------|-----------|
| ZNF883    | 0.263 | 3.244E-01 | 9.659E-04 |
| PRRT2     | 0.263 | 2.062E-01 | 2.187E-01 |
| MCIDAS    | 0.263 | 2.565E-01 | 9.148E-02 |
| NLRP6     | 0.263 | 3.402E-01 | 6.639E-01 |
| CYP27A1   | 0.263 | 3.056E-01 | 1.100E-02 |
| CD109     | 0.263 | 4.159E-01 | 7.959E-02 |
| TLL2      | 0.262 | 4.522E-01 | 1.433E-02 |
| PLIN2     | 0.262 | 1.658E-01 | 3.762E-01 |
| CHSY3     | 0.262 | 2.511E-01 | 1.055E-02 |
| CD300C    | 0.262 | 3.945E-01 | 8.124E-01 |
| RDH13     | 0.262 | 5.858E-02 | 8.109E-01 |
| EDNRA     | 0.262 | 2.294E-01 | 7.677E-01 |
| FAM205C   | 0.262 | 6.591E-01 | 3.059E-02 |
| RORC      | 0.261 | 5.070E-01 | 6.240E-05 |
| MIR4444-2 | 0.261 | NA        | 2.530E-03 |
| ARMCX3    | 0.261 | 8.189E-03 | 4.540E-01 |
| SEMA6D    | 0.261 | 3.267E-01 | 5.932E-02 |
| CLDN23    | 0.261 | 2.819E-01 | 3.735E-02 |
| TAGLN2    | 0.261 | 6.772E-02 | 1.442E-02 |
| ALPK3     | 0.261 | 1.775E-01 | 1.147E-01 |
| CDS1      | 0.261 | 5.167E-02 | 9.494E-02 |
| MAS1L     | 0.261 | 7.583E-01 | 2.918E-01 |
| SMARCA2   | 0.261 | 2.469E-02 | 1.450E-03 |
| ITGA10    | 0.261 | 2.032E-01 | 7.502E-03 |
| IGDCC3    | 0.260 | 6.417E-01 | 9.709E-02 |
| PXMP4     | 0.260 | 8.351E-02 | 6.859E-04 |
| MIR4787   | 0.260 | NA        | 3.470E-04 |
| NKAIN1    | 0.260 | 4.841E-01 | 4.557E-03 |
| LCNL1     | 0.260 | 5.105E-01 | 8.214E-02 |
| CRYBG3    | 0.260 | 1.824E-01 | 2.008E-02 |
| PMVK      | 0.260 | 1.642E-02 | 5.359E-02 |
| FAM102A   | 0.260 | 1.664E-02 | 4.545E-01 |
| NOX5      | 0.260 | 3.878E-01 | 3.852E-01 |
| CAV3      | 0.260 | 6.829E-01 | 7.729E-02 |
| PCDH20    | 0.260 | 7.285E-01 | 1.177E-04 |
| RADIL     | 0.260 | 3.729E-01 | 8.235E-02 |
| CD300LG   | 0.260 | 5.935E-01 | 1.384E-01 |
| TRHDE     | 0.260 | 5.702E-01 | 2.912E-01 |
| DTNA      | 0.260 | 4.560E-01 | 7.801E-02 |
| AQP9      | 0.260 | 4.500E-01 | 2.386E-01 |
| PPP1R3G   | 0.260 | 2.356E-01 | 2.111E-01 |
| SLC35C1   | 0.259 | 9.832E-03 | 6.295E-03 |
| CRABP1    | 0.259 | 6.336E-01 | 6.460E-03 |
| POU6F1    | 0.259 | 7.661E-02 | 7.788E-01 |
| NECTIN2   | 0.259 | 1.033E-02 | 4.126E-02 |
| GGCT      | 0.259 | 2.322E-02 | 1.808E-03 |
| SPTBN1    | 0.259 | 3.893E-02 | 2.166E-01 |
| TNS2      | 0.259 | 8.409E-02 | 8.206E-02 |
| WFDC8     | 0.259 | 7.036E-01 | 5.986E-04 |
| PARD3B    | 0.259 | 1.985E-01 | 5.421E-01 |

|            |       |           |           |
|------------|-------|-----------|-----------|
| PLAGL1     | 0.259 | 2.349E-01 | 5.319E-02 |
| TOB1       | 0.259 | 1.568E-01 | 5.142E-01 |
| ADAM17     | 0.259 | 6.321E-02 | 3.940E-05 |
| ZEB1       | 0.259 | 1.963E-01 | 7.490E-01 |
| AL160275.1 | 0.259 | 3.953E-01 | 6.962E-02 |
| XPR1       | 0.259 | 3.198E-02 | 7.001E-03 |
| TEKT2      | 0.259 | 4.236E-01 | 3.868E-01 |
| PROCA1     | 0.258 | 1.878E-01 | 2.794E-01 |
| PTF1A      | 0.258 | NA        | 6.250E-07 |
| MIR4802    | 0.258 | NA        | 2.964E-03 |
| ZFPM2      | 0.258 | 3.107E-01 | 7.809E-01 |
| OOEP       | 0.258 | 6.655E-01 | 7.744E-01 |
| TCAF2      | 0.258 | 1.250E-01 | 2.787E-01 |
| C1QTNF6    | 0.258 | 2.246E-01 | 2.074E-03 |
| GK3P       | 0.257 | 4.569E-01 | 1.067E-01 |
| SH2D7      | 0.257 | 2.901E-01 | 1.654E-01 |
| ARHGAP20   | 0.257 | 3.472E-01 | 2.912E-02 |
| MIR126     | 0.257 | 4.522E-01 | 2.743E-01 |
| HCN2       | 0.256 | 2.858E-01 | 7.875E-01 |
| MAP6D1     | 0.256 | 7.926E-02 | 2.039E-02 |
| TBC1D1     | 0.256 | 4.318E-02 | 8.421E-03 |
| NAALADL2   | 0.256 | 3.013E-01 | 3.600E-02 |
| DCAF12L2   | 0.256 | 6.145E-01 | 3.797E-04 |
| TULP2      | 0.256 | 3.973E-01 | 6.921E-01 |
| KCTD8      | 0.256 | 5.996E-01 | 4.370E-05 |
| MREG       | 0.256 | 4.852E-02 | 1.590E-01 |
| ISLR2      | 0.256 | 3.755E-01 | 2.373E-01 |
| ASRGL1     | 0.256 | 3.670E-01 | 1.059E-01 |
| 44079.000  | 0.256 | 2.835E-01 | 2.728E-02 |
| ETV5       | 0.256 | 1.810E-01 | 7.980E-02 |
| PLXDC2     | 0.255 | 2.396E-01 | 6.229E-02 |
| C7orf61    | 0.255 | 1.721E-01 | 5.672E-01 |
| SHMT1      | 0.255 | 7.092E-02 | 1.208E-01 |
| ARL4C      | 0.255 | 1.694E-01 | 2.159E-03 |
| TMIGD3     | 0.255 | 3.041E-01 | 1.239E-01 |
| C2CD4A     | 0.255 | 4.427E-01 | 1.863E-01 |
| CFB        | 0.255 | 3.675E-01 | 5.599E-01 |
| PNPLA1     | 0.255 | 4.709E-01 | 9.764E-02 |
| AC068580.4 | 0.255 | 2.616E-01 | 1.456E-02 |
| KCNIP3     | 0.255 | 3.286E-01 | 6.975E-01 |
| SLC25A41   | 0.255 | 4.607E-01 | 5.306E-04 |
| CPN2       | 0.255 | 6.122E-01 | 4.818E-01 |
| PCDH18     | 0.254 | 2.462E-01 | 6.419E-02 |
| EDEM1      | 0.254 | 2.194E-02 | 6.015E-01 |
| KCNC3      | 0.254 | 3.084E-01 | 1.970E-05 |
| ACTL7B     | 0.254 | 6.392E-01 | 3.780E-01 |
| EXPH5      | 0.254 | 1.586E-01 | 7.144E-02 |
| H2BFS      | 0.254 | NA        | 4.317E-04 |
| FNDC11     | 0.254 | 3.630E-01 | 1.639E-01 |
| FAM124B    | 0.254 | 2.305E-01 | 3.021E-02 |

|            |       |           |           |
|------------|-------|-----------|-----------|
| GLRA3      | 0.254 | 5.630E-01 | 1.341E-01 |
| ALDH1L2    | 0.254 | 3.743E-01 | 8.252E-02 |
| EPB41      | 0.254 | 8.505E-02 | 1.248E-02 |
| CNGB1      | 0.254 | 4.891E-01 | 1.666E-01 |
| PTGS2      | 0.254 | 4.281E-01 | 7.254E-01 |
| IL18R1     | 0.253 | 1.877E-01 | 7.920E-05 |
| P3H4       | 0.253 | 1.005E-01 | 3.373E-02 |
| KRTAP5-4   | 0.253 | 7.217E-01 | 2.154E-02 |
| MIEN1      | 0.253 | 7.699E-02 | 6.233E-04 |
| ACO1       | 0.253 | 3.830E-02 | 4.911E-04 |
| MIR3135A   | 0.253 | NA        | 3.738E-02 |
| ROR1       | 0.253 | 3.600E-01 | 7.436E-02 |
| RIIAD1     | 0.253 | 5.407E-01 | 9.639E-03 |
| HSPA2      | 0.253 | 2.399E-01 | 3.091E-04 |
| CALY       | 0.252 | 5.737E-01 | 1.281E-01 |
| NRCAM      | 0.252 | 5.114E-01 | 5.784E-01 |
| CLMN       | 0.252 | 1.456E-01 | 2.620E-02 |
| ZC3HAV1L   | 0.252 | 9.092E-02 | 7.804E-02 |
| AD000671.1 | 0.252 | 3.314E-01 | 8.917E-04 |
| SCCPDH     | 0.252 | 1.877E-01 | 7.444E-04 |
| CLMP       | 0.252 | 4.031E-01 | 1.295E-01 |
| DC169-SOHL | 0.252 | 5.749E-01 | 2.450E-01 |
| ANTXR2     | 0.252 | 1.958E-01 | 1.767E-01 |
| CDKN2A     | 0.252 | 5.808E-01 | 5.400E-02 |
| PLCXD3     | 0.252 | 6.413E-01 | 1.553E-01 |
| LRRC46     | 0.252 | 7.921E-02 | 4.053E-02 |
| HOMER2     | 0.252 | 2.755E-01 | 3.492E-02 |
| TCEAL5     | 0.251 | 6.231E-01 | 1.187E-04 |
| DSTN       | 0.251 | 6.005E-03 | 9.208E-03 |
| FAR2       | 0.251 | 3.369E-01 | 1.315E-02 |
| FERMT2     | 0.251 | 2.405E-01 | 1.991E-01 |
| ZP2        | 0.251 | 7.026E-01 | 7.861E-01 |
| GLMP       | 0.251 | 1.104E-02 | 1.549E-02 |
| C1R        | 0.251 | 2.989E-01 | 6.107E-02 |
| FAM83D     | 0.251 | 1.377E-01 | 1.270E-03 |
| FCN2       | 0.251 | 6.949E-01 | 3.570E-02 |
| C1orf185   | 0.251 | NA        | 2.310E-02 |
| SLC25A52   | 0.251 | 4.652E-01 | 9.825E-02 |
| SGSM1      | 0.251 | 4.645E-01 | 9.735E-03 |
| GPR176     | 0.251 | 3.238E-01 | 1.199E-02 |
| CYP46A1    | 0.251 | 2.770E-01 | 9.964E-02 |
| NAP1L3     | 0.251 | 4.170E-01 | 5.861E-03 |
| ZNF835     | 0.251 | 4.518E-01 | 2.338E-01 |
| KIAA2022   | 0.251 | 5.373E-01 | 8.254E-02 |
| ACOT1      | 0.251 | 1.195E-01 | 7.865E-02 |
| OR5T2      | 0.250 | NA        | 1.023E-01 |
| XIRP2      | 0.250 | 6.991E-01 | 6.320E-05 |
| MIR3690    | 0.250 | NA        | 3.709E-02 |
| PLOD1      | 0.250 | 3.078E-02 | 6.860E-05 |
| DSEL       | 0.250 | 2.878E-01 | 2.236E-01 |

|            |       |           |           |
|------------|-------|-----------|-----------|
| MIR4263    | 0.250 | 1.174E-01 | 3.810E-06 |
| HTR3B      | 0.250 | 8.107E-01 | 8.060E-05 |
| USP2       | 0.250 | 3.093E-01 | 1.854E-02 |
| TMEM147    | 0.250 | 2.106E-02 | 2.771E-02 |
| SPON2      | 0.250 | 3.104E-01 | 2.903E-02 |
| MIR33B     | 0.249 | 6.726E-01 | 3.427E-01 |
| TRAM1      | 0.249 | 2.341E-02 | 3.313E-02 |
| FTCDNL1    | 0.249 | 4.331E-01 | 2.339E-01 |
| MIR4726    | 0.249 | NA        | 2.286E-04 |
| FGF6       | 0.249 | NA        | 1.226E-02 |
| FMOD       | 0.249 | 3.362E-01 | 8.240E-01 |
| FGF12      | 0.249 | 3.996E-01 | 3.202E-01 |
| PRPH       | 0.249 | 5.860E-01 | 6.955E-02 |
| SFTA3      | 0.249 | 7.770E-01 | 5.063E-02 |
| MAGED4     | 0.249 | 7.656E-01 | 4.404E-02 |
| ECH1       | 0.249 | 3.267E-02 | 1.959E-03 |
| FAM81A     | 0.249 | 2.193E-01 | 7.546E-02 |
| HCAR3      | 0.249 | 4.137E-01 | 9.989E-02 |
| TRPC1      | 0.249 | 1.892E-01 | 2.447E-01 |
| CLEC1B     | 0.249 | 5.703E-01 | 1.237E-01 |
| TIMP4      | 0.249 | 4.362E-01 | 8.250E-02 |
| CAV1       | 0.249 | 3.982E-01 | 4.334E-01 |
| C5         | 0.248 | 1.273E-01 | 3.113E-02 |
| SMAGP      | 0.248 | 1.146E-01 | 7.908E-03 |
| F7         | 0.248 | 5.010E-01 | 9.159E-04 |
| LRRC32     | 0.248 | 2.496E-01 | 9.573E-02 |
| CGB2       | 0.248 | 7.722E-01 | 1.335E-01 |
| PRPF18     | 0.248 | 1.770E-03 | 4.201E-01 |
| ZNF704     | 0.248 | 1.974E-01 | 2.349E-01 |
| PRADC1     | 0.248 | 3.649E-02 | 1.385E-02 |
| ALKAL2     | 0.248 | 3.923E-01 | 1.313E-01 |
| LYG2       | 0.248 | 3.469E-01 | 3.440E-05 |
| PPP2R3A    | 0.248 | 1.278E-01 | 8.667E-01 |
| XAGE1B     | 0.248 | 8.831E-01 | 2.423E-01 |
| UGT1A3     | 0.247 | 5.592E-01 | 5.253E-02 |
| UBE2E2     | 0.247 | 3.075E-01 | 4.823E-02 |
| SHTN1      | 0.247 | 1.734E-01 | 4.654E-01 |
| ANXA2      | 0.247 | 1.328E-01 | 4.614E-01 |
| COL12A1    | 0.247 | 3.375E-01 | 3.595E-01 |
| TAB3       | 0.246 | 8.128E-03 | 3.123E-01 |
| SCN2A      | 0.246 | 5.749E-01 | 5.310E-02 |
| CLEC11A    | 0.246 | 2.760E-01 | 2.862E-02 |
| SCARF2     | 0.246 | 3.172E-01 | 6.036E-03 |
| VEGF       | 0.246 | 3.696E-01 | 1.171E-01 |
| RIPPLY3    | 0.246 | 3.743E-01 | 1.770E-01 |
| GABARAPL1  | 0.245 | 3.880E-02 | 8.571E-03 |
| S100A10    | 0.245 | 3.071E-01 | 1.485E-01 |
| AC002985.1 | 0.245 | 6.478E-01 | 8.694E-02 |
| PGBD5      | 0.245 | 4.806E-01 | 5.901E-01 |
| MTRNR2L4   | 0.245 | 3.048E-01 | 1.007E-04 |



|           |       |           |           |
|-----------|-------|-----------|-----------|
| AP3B2     | 0.245 | 4.930E-01 | 6.204E-01 |
| TMEM109   | 0.245 | 3.071E-03 | 6.794E-02 |
| GLYATL1P3 | 0.245 | 6.527E-01 | 1.361E-03 |
| CATSPERG  | 0.245 | 2.583E-01 | 8.577E-01 |
| KRT3      | 0.245 | 5.936E-01 | 4.981E-03 |
| MIR5094   | 0.244 | 6.846E-01 | 6.584E-01 |
| B3GNT9    | 0.244 | 4.224E-02 | 5.025E-02 |
| LRRC73    | 0.244 | 2.498E-01 | 1.735E-02 |
| KRT10     | 0.244 | 2.141E-01 | 2.399E-04 |
| COPA      | 0.244 | 1.221E-02 | 8.080E-02 |
| MSR1      | 0.244 | 3.853E-01 | 2.303E-01 |
| TUBB2A    | 0.244 | 2.914E-01 | 5.600E-05 |
| MCEE      | 0.244 | 5.126E-03 | 1.097E-04 |
| NEK11     | 0.244 | 2.178E-02 | 2.352E-02 |
| ESYT2     | 0.244 | 8.653E-03 | 8.469E-02 |
| NR0B1     | 0.244 | 7.970E-01 | 1.104E-03 |
| RENBP     | 0.244 | 3.165E-01 | 1.433E-02 |
| BMP4      | 0.244 | 4.028E-01 | 1.624E-02 |
| ABLIM3    | 0.244 | 2.818E-01 | 7.117E-01 |
| EFHB      | 0.244 | 2.565E-01 | 1.313E-01 |
| TGM5      | 0.244 | 5.829E-01 | 7.485E-02 |
| WDR62     | 0.243 | 1.195E-01 | 3.580E-05 |
| AKR7A2    | 0.243 | 3.777E-03 | 1.454E-01 |
| BCAT1     | 0.243 | 4.422E-01 | 4.725E-02 |
| FXVD7     | 0.243 | 4.823E-01 | 4.040E-03 |
| CCDC103   | 0.243 | 4.986E-01 | 1.119E-01 |
| IFFO2     | 0.243 | 2.116E-01 | 4.710E-01 |
| SLC34A2   | 0.243 | 7.251E-01 | 3.343E-01 |
| RECK      | 0.243 | 1.964E-01 | 1.549E-01 |
| RHOV      | 0.242 | 3.031E-01 | 2.538E-02 |
| PHACTR2   | 0.242 | 4.494E-02 | 2.774E-01 |
| CUEDC1    | 0.242 | 8.608E-02 | 3.702E-01 |
| MINDY2    | 0.242 | 6.633E-02 | 5.493E-03 |
| SOSTDC1   | 0.242 | 6.641E-01 | 4.370E-02 |
| CFAP54    | 0.242 | 2.688E-01 | 4.174E-02 |
| E2F1      | 0.242 | 1.738E-01 | 4.471E-03 |
| MAML2     | 0.242 | 7.483E-02 | 3.976E-01 |
| CSMD2     | 0.242 | 3.221E-01 | 7.524E-02 |
| GDPD5     | 0.242 | 1.443E-01 | 1.475E-02 |
| MMP8      | 0.241 | 6.336E-01 | 2.246E-03 |
| LGALS14   | 0.241 | 8.479E-01 | 1.318E-02 |
| SLAMF9    | 0.241 | 5.413E-01 | 2.530E-01 |
| EPHX1     | 0.241 | 2.095E-01 | 5.682E-02 |
| UNC5D     | 0.241 | 7.426E-01 | 4.761E-02 |
| SLC9A3R2  | 0.241 | 9.253E-02 | 7.806E-03 |
| FRMPD2    | 0.241 | 5.433E-01 | 1.518E-02 |
| CXADR     | 0.241 | 2.547E-01 | 1.915E-02 |
| MSX2      | 0.241 | 3.902E-01 | 3.373E-03 |
| PLK5      | 0.241 | 5.157E-01 | 1.907E-02 |
| DAP       | 0.241 | 4.689E-02 | 4.890E-05 |

|            |       |           |           |
|------------|-------|-----------|-----------|
| RTL8B      | 0.241 | 3.745E-02 | 8.272E-01 |
| MED8       | 0.241 | 7.403E-04 | 7.685E-01 |
| BBOF1      | 0.240 | 4.917E-02 | 2.029E-01 |
| TACR1      | 0.240 | 4.808E-01 | 7.997E-04 |
| PDGFRL     | 0.240 | 4.080E-01 | 3.954E-02 |
| DHRS13     | 0.240 | 1.616E-01 | 1.038E-01 |
| GOLGA4     | 0.240 | 1.520E-02 | 1.307E-01 |
| HACD2      | 0.240 | 3.251E-02 | 1.674E-01 |
| CYB5A      | 0.240 | 2.645E-01 | 7.292E-01 |
| KANK1      | 0.240 | 1.296E-01 | 3.329E-02 |
| ZP3        | 0.240 | 2.035E-01 | 4.397E-02 |
| MAGI2      | 0.240 | 1.657E-01 | 1.709E-03 |
| ARHGEF25   | 0.239 | 2.501E-01 | 1.528E-01 |
| ACTN1      | 0.239 | 1.682E-01 | 1.615E-01 |
| TLR7       | 0.239 | 4.497E-01 | 2.421E-01 |
| TTC7A      | 0.239 | 7.029E-02 | 1.599E-01 |
| HTATSF1    | 0.239 | 1.215E-03 | 1.919E-02 |
| HCAR2      | 0.239 | 4.150E-01 | 9.219E-01 |
| MIR567     | 0.239 | 5.100E-01 | 1.308E-03 |
| CNTD2      | 0.239 | 4.907E-01 | 1.790E-02 |
| MRPS12     | 0.239 | 5.593E-02 | 3.474E-02 |
| TMEM47     | 0.239 | 3.509E-01 | 5.132E-02 |
| CAMK2N1    | 0.239 | 3.339E-01 | 6.510E-01 |
| RASD2      | 0.239 | 3.465E-01 | 1.702E-01 |
| MIR657     | 0.239 | 6.198E-01 | 9.184E-02 |
| UPP1       | 0.239 | 1.603E-01 | 1.967E-01 |
| MIR4767    | 0.239 | 6.839E-01 | 2.609E-01 |
| KRT18      | 0.238 | 2.580E-01 | 1.524E-02 |
| FSCB       | 0.238 | 7.752E-01 | 2.201E-02 |
| SLC16A6    | 0.238 | 3.102E-01 | 6.484E-01 |
| LRRTM4     | 0.238 | 6.632E-01 | 1.372E-02 |
| CLEC2A     | 0.238 | 8.050E-01 | 6.801E-02 |
| LY96       | 0.238 | 3.545E-01 | 3.198E-02 |
| CHST3      | 0.238 | 2.785E-01 | 4.607E-02 |
| GRHL1      | 0.238 | 2.770E-01 | 2.766E-01 |
| TRIM16     | 0.238 | 1.232E-01 | 5.659E-03 |
| BTC        | 0.238 | 3.396E-01 | 4.239E-01 |
| KIF26B     | 0.238 | 3.268E-01 | 1.666E-04 |
| PCDHGB4    | 0.238 | 4.999E-01 | 6.463E-02 |
| HIPK3      | 0.238 | 2.298E-02 | 5.123E-01 |
| FADS1      | 0.238 | 2.903E-01 | 6.640E-02 |
| SFRP1      | 0.238 | 6.004E-01 | 1.281E-01 |
| GXYLT2     | 0.237 | 4.725E-01 | 6.368E-01 |
| AC005779.2 | 0.237 | 4.562E-01 | 8.320E-01 |
| MIR345     | 0.237 | NA        | 1.420E-01 |
| DHDDS      | 0.237 | 2.444E-04 | 1.353E-01 |
| NME9       | 0.237 | 2.139E-01 | 2.397E-02 |
| RCC1       | 0.237 | 1.563E-02 | 5.530E-02 |
| RAB31      | 0.237 | 2.487E-01 | 1.156E-01 |
| LINGO1     | 0.237 | 3.219E-01 | 4.435E-02 |

|            |       |           |           |
|------------|-------|-----------|-----------|
| GGCX       | 0.237 | 2.277E-03 | 9.931E-02 |
| PLSCR4     | 0.237 | 2.575E-01 | 3.572E-01 |
| AC010422.5 | 0.237 | NA        | 3.351E-04 |
| CYP24A1    | 0.237 | 6.067E-01 | 5.677E-02 |
| TEKT4      | 0.237 | 5.026E-01 | 8.295E-01 |
| ZNF573     | 0.236 | 6.300E-02 | 8.225E-01 |
| PHYH       | 0.236 | 9.786E-02 | 6.947E-02 |
| TDRKH      | 0.236 | 1.603E-01 | 1.225E-01 |
| DMRTC2     | 0.236 | 7.257E-01 | 6.441E-01 |
| KCNJ8      | 0.236 | 3.201E-01 | 5.567E-04 |
| PDZRN4     | 0.236 | 6.535E-01 | 1.134E-02 |
| CNRIP1     | 0.236 | 2.989E-01 | 2.707E-01 |
| TGFBR1     | 0.236 | 1.472E-01 | 1.723E-04 |
| KCNMB3     | 0.236 | 8.175E-02 | 1.983E-01 |
| KIAA1755   | 0.235 | 4.888E-01 | 1.050E-01 |
| MINDY4B    | 0.235 | 5.691E-01 | 6.393E-01 |
| TMEM266    | 0.235 | 8.627E-02 | 2.056E-02 |
| KCTD3      | 0.235 | 1.298E-02 | 8.593E-01 |
| ZNF117     | 0.235 | 3.755E-01 | 1.020E-01 |
| ATP11A     | 0.235 | 1.814E-01 | 7.814E-02 |
| FBLN2      | 0.235 | 4.289E-01 | 8.454E-02 |
| C2orf72    | 0.235 | 5.788E-01 | 8.908E-02 |
| CSF1       | 0.235 | 3.182E-01 | 1.474E-02 |
| ANXA8      | 0.235 | 4.282E-01 | 8.544E-03 |
| OTUD7B     | 0.235 | 9.642E-03 | 5.583E-03 |
| NET1       | 0.235 | 1.579E-01 | 1.551E-03 |
| GRIK2      | 0.234 | 5.299E-01 | 5.232E-02 |
| CALM2      | 0.234 | 2.296E-03 | 4.514E-04 |
| OLR1       | 0.234 | 5.772E-01 | 2.252E-01 |
| AUNIP      | 0.234 | 1.221E-01 | 3.561E-01 |
| MMRN2      | 0.234 | 3.816E-01 | 2.112E-01 |
| TUNAR      | 0.234 | 8.327E-01 | 1.227E-01 |
| IFRD1      | 0.234 | 3.170E-02 | 9.166E-02 |
| GDF7       | 0.234 | 4.921E-01 | 2.423E-02 |
| ZNF706     | 0.234 | 1.176E-01 | 3.994E-04 |
| GPRC5B     | 0.234 | 3.342E-01 | 6.834E-01 |
| DCST2      | 0.234 | 2.517E-01 | 1.524E-01 |
| ITGB1BP2   | 0.234 | 2.171E-01 | 7.588E-02 |
| BFSP1      | 0.234 | 1.458E-01 | 7.878E-01 |
| DACT1      | 0.233 | 3.998E-01 | 1.849E-03 |
| STK3       | 0.233 | 2.032E-02 | 3.347E-04 |
| LRP1       | 0.233 | 1.656E-01 | 2.367E-01 |
| MIR4706    | 0.233 | 6.822E-01 | 6.542E-01 |
| AC135178.2 | 0.233 | 4.075E-01 | 6.673E-03 |
| EFNA3      | 0.233 | 2.479E-01 | 2.493E-04 |
| GLA        | 0.233 | 4.851E-02 | 3.561E-01 |
| C15orf59   | 0.233 | 4.833E-01 | 7.460E-01 |
| MIR3909    | 0.233 | NA        | 5.460E-07 |
| ANKRD13A   | 0.232 | 3.200E-02 | 1.485E-04 |
| CASC10     | 0.232 | 4.426E-01 | 1.695E-02 |

|            |       |           |           |
|------------|-------|-----------|-----------|
| PRDM12     | 0.232 | 4.033E-01 | 3.032E-01 |
| SETBP1     | 0.232 | 3.294E-01 | 1.670E-01 |
| CSMD3      | 0.232 | 6.822E-01 | 7.639E-01 |
| UBTD1      | 0.232 | 8.396E-02 | 3.482E-01 |
| DZIP1L     | 0.232 | 2.202E-01 | 1.954E-03 |
| PALM3      | 0.232 | 5.829E-01 | 7.427E-02 |
| SLC22A8    | 0.232 | NA        | 6.210E-02 |
| CEACAM16   | 0.232 | 7.193E-01 | 6.344E-02 |
| ART1       | 0.232 | 6.631E-01 | 1.022E-01 |
| SIAH3      | 0.231 | 6.036E-01 | 3.865E-02 |
| CFAP52     | 0.231 | 2.885E-01 | 1.954E-01 |
| WFDC2      | 0.231 | 5.024E-01 | 2.463E-03 |
| GALNT15    | 0.231 | 4.745E-01 | 6.577E-02 |
| ANKRD34A   | 0.231 | 1.365E-01 | 1.322E-01 |
| DAGLA      | 0.231 | 2.746E-01 | 4.031E-01 |
| CLPSL1     | 0.231 | 6.749E-01 | 6.058E-02 |
| CCDC178    | 0.231 | 4.737E-01 | 5.474E-02 |
| SPAG8      | 0.231 | 1.662E-01 | 2.086E-02 |
| SLC6A6     | 0.231 | 1.601E-01 | 1.352E-01 |
| CNTNAP3    | 0.231 | 5.673E-01 | 4.603E-04 |
| MYL3       | 0.231 | 5.194E-01 | 7.982E-01 |
| FGF2       | 0.231 | 4.302E-01 | 4.544E-03 |
| MIR5188    | 0.230 | 6.029E-01 | 3.914E-01 |
| B4GALT4    | 0.230 | 1.417E-01 | 7.876E-01 |
| LAMB2      | 0.230 | 1.221E-01 | 6.487E-01 |
| RNF144A    | 0.230 | 1.436E-01 | 3.918E-04 |
| FAM106A    | 0.230 | 6.235E-01 | 1.771E-01 |
| VAT1L      | 0.230 | 4.317E-01 | 1.022E-01 |
| SEC13      | 0.230 | 1.045E-02 | 3.912E-01 |
| MAL2       | 0.230 | 2.608E-01 | 1.243E-03 |
| C14orf37   | 0.230 | 2.664E-01 | 5.671E-01 |
| OR52E6     | 0.230 | 8.587E-01 | 3.494E-01 |
| ACPP       | 0.230 | 3.855E-01 | 2.351E-01 |
| CADPS2     | 0.230 | 1.836E-01 | 5.089E-01 |
| CLLU1      | 0.229 | 6.311E-01 | 9.210E-03 |
| FAM171A2   | 0.229 | 3.996E-01 | 6.537E-03 |
| MIR378G    | 0.229 | 7.278E-01 | 4.504E-02 |
| ARMC9      | 0.229 | 7.581E-02 | 1.416E-02 |
| HIST1H3G   | 0.229 | 4.889E-01 | 4.561E-03 |
| THAP8      | 0.229 | 3.200E-02 | 1.435E-01 |
| PXDN       | 0.229 | 3.576E-01 | 2.837E-02 |
| TES        | 0.229 | 6.228E-02 | 3.113E-02 |
| TEAD1      | 0.229 | 6.012E-02 | 1.952E-01 |
| PCYOX1     | 0.229 | 7.698E-03 | 2.050E-01 |
| ULK4       | 0.229 | 8.038E-02 | 9.970E-06 |
| SYT15      | 0.229 | 3.056E-01 | 5.739E-01 |
| POGK       | 0.228 | 8.038E-02 | 4.218E-02 |
| GPR26      | 0.228 | 7.162E-01 | 5.831E-01 |
| AC006269.1 | 0.228 | 7.525E-01 | 3.889E-03 |
| LAYN       | 0.228 | 3.061E-01 | 2.090E-05 |

|            |       |           |           |
|------------|-------|-----------|-----------|
| MPC2       | 0.228 | 8.468E-02 | 5.021E-02 |
| GATA2      | 0.228 | 4.413E-01 | 1.607E-01 |
| C10orf55   | 0.228 | 3.561E-01 | 1.601E-01 |
| FRRS1      | 0.228 | 3.782E-01 | 6.847E-01 |
| CALML5     | 0.228 | 7.423E-01 | 2.390E-03 |
| AC106782.1 | 0.228 | 3.974E-01 | 3.190E-02 |
| GPR137C    | 0.228 | 3.623E-01 | 2.443E-01 |
| MIR6165    | 0.228 | NA        | 3.195E-01 |
| ARID5B     | 0.228 | 6.732E-02 | 1.381E-01 |
| MYOG       | 0.228 | 7.488E-01 | 3.059E-01 |
| POMK       | 0.228 | 2.607E-01 | 9.270E-04 |
| CTF1       | 0.227 | 2.039E-01 | 8.150E-02 |
| PLCD1      | 0.227 | 3.046E-01 | 2.389E-02 |
| MMP16      | 0.227 | 4.352E-01 | 4.031E-04 |
| RAB6B      | 0.227 | 3.446E-01 | 4.460E-02 |
| TSHZ3      | 0.227 | 3.673E-01 | 1.219E-01 |
| SUCO       | 0.227 | 4.198E-02 | 1.398E-03 |
| PRR34      | 0.227 | 1.805E-01 | 7.870E-04 |
| CTH        | 0.226 | 2.666E-01 | 2.745E-02 |
| PDZD2      | 0.226 | 3.859E-01 | 1.014E-03 |
| DHRS7C     | 0.226 | NA        | 1.528E-01 |
| ZFP92      | 0.226 | 4.170E-01 | 5.635E-01 |
| OXCT1      | 0.226 | 4.025E-01 | 4.114E-01 |
| ABHD1      | 0.226 | 3.218E-01 | 3.365E-01 |
| WNT8B      | 0.226 | 5.815E-01 | 5.415E-04 |
| LOXL2      | 0.225 | 2.833E-01 | 1.242E-01 |
| OTOP1      | 0.225 | NA        | 3.639E-01 |
| TSPYL5     | 0.225 | 4.547E-01 | 6.727E-01 |
| APOA2      | 0.225 | 7.793E-01 | 4.610E-02 |
| MDFIC      | 0.225 | 9.760E-02 | 1.175E-03 |
| FAM189A2   | 0.225 | 3.905E-01 | 3.685E-03 |
| NT5C2      | 0.225 | 1.639E-01 | 5.424E-01 |
| BACE1      | 0.225 | 1.021E-01 | 6.101E-01 |
| OR4E2      | 0.225 | NA        | 1.523E-01 |
| GUCY1B3    | 0.225 | 1.876E-01 | 6.099E-04 |
| SGCB       | 0.225 | 1.310E-01 | 7.162E-02 |
| LPCAT1     | 0.225 | 2.566E-01 | 2.258E-01 |
| LINC01314  | 0.225 | 7.011E-01 | 1.136E-02 |
| FNDC3B     | 0.225 | 5.068E-02 | 2.577E-01 |
| DUSP3      | 0.224 | 9.832E-03 | 6.129E-02 |
| PLEKHB1    | 0.224 | 4.428E-01 | 8.648E-04 |
| DKKL1      | 0.224 | 5.731E-01 | 1.739E-02 |
| MYZAP      | 0.224 | 3.798E-01 | 5.696E-02 |
| IL20       | 0.224 | 6.951E-01 | 2.240E-01 |
| COPZ2      | 0.224 | 3.547E-01 | 8.792E-01 |
| SCN3A      | 0.224 | 5.426E-01 | 7.180E-02 |
| RAB11FIP4  | 0.224 | 2.463E-01 | 3.932E-01 |
| MOCS1      | 0.224 | 2.420E-01 | 5.258E-01 |
| PDIK1L     | 0.224 | 2.804E-02 | 3.508E-02 |
| LAMA4      | 0.224 | 2.462E-01 | 3.542E-03 |

|            |       |           |           |
|------------|-------|-----------|-----------|
| CACNA1F    | 0.224 | 3.809E-01 | 2.074E-02 |
| FBXO47     | 0.224 | 6.515E-01 | 6.654E-02 |
| NCSTN      | 0.224 | 2.621E-02 | 4.055E-01 |
| CCL26      | 0.224 | 5.496E-01 | 8.158E-01 |
| CEACAM5    | 0.224 | 7.086E-01 | 7.737E-02 |
| SIGLEC9    | 0.223 | 4.302E-01 | 9.045E-02 |
| CLDN7      | 0.223 | 1.940E-01 | 1.311E-01 |
| TYROBP     | 0.223 | 4.378E-01 | 6.308E-01 |
| ARMCX6     | 0.223 | 3.166E-02 | 5.851E-01 |
| ZAR1L      | 0.223 | 5.434E-01 | 2.760E-01 |
| TUFT1      | 0.223 | 1.398E-01 | 3.512E-04 |
| KIAA1644   | 0.222 | 5.460E-01 | 5.142E-02 |
| ADD2       | 0.222 | 6.184E-01 | 8.065E-02 |
| INPP4A     | 0.222 | 1.238E-01 | 6.435E-03 |
| ABI3BP     | 0.222 | 4.737E-01 | 4.377E-01 |
| LRP11      | 0.222 | 8.242E-02 | 4.104E-01 |
| C2CD2L     | 0.222 | 8.650E-03 | 5.537E-02 |
| ARHGAP33   | 0.222 | 2.051E-01 | 1.130E-04 |
| KRTAP4-9   | 0.222 | NA        | 2.841E-01 |
| MPP2       | 0.222 | 3.286E-01 | 9.606E-02 |
| LRFN1      | 0.222 | 3.729E-01 | 1.062E-02 |
| CLN3       | 0.221 | 4.575E-02 | 1.109E-01 |
| MAGEC2     | 0.221 | 8.270E-01 | 8.863E-02 |
| VSIG8      | 0.221 | 4.376E-01 | 7.629E-01 |
| LHX4       | 0.220 | 3.511E-01 | 4.408E-02 |
| CTSL       | 0.220 | 2.608E-01 | 2.941E-01 |
| BANF2      | 0.220 | NA        | 8.899E-01 |
| SELENOM    | 0.220 | 3.740E-01 | 2.693E-02 |
| LRFN2      | 0.220 | 6.432E-01 | 1.695E-03 |
| HSPB9      | 0.220 | 2.920E-01 | 1.531E-01 |
| SPTAN1     | 0.220 | 1.690E-02 | 5.480E-03 |
| DGAT2      | 0.220 | 3.925E-01 | 5.894E-04 |
| TMEM132C   | 0.220 | 6.924E-01 | 2.195E-01 |
| FAM217A    | 0.220 | 4.511E-01 | 1.445E-01 |
| PCDHA6     | 0.220 | 6.853E-01 | 4.161E-01 |
| AC092042.3 | 0.220 | 5.413E-01 | 1.446E-01 |
| C9orf92    | 0.220 | 7.559E-01 | 3.580E-05 |
| LGALS3     | 0.220 | 1.532E-01 | 2.303E-02 |
| GDF2       | 0.219 | NA        | 1.743E-02 |
| NR1D1      | 0.219 | 1.811E-01 | 1.960E-02 |
| PDLIM7     | 0.219 | 2.195E-01 | 1.585E-01 |
| C8orf86    | 0.219 | NA        | 9.423E-02 |
| CLIP2      | 0.219 | 1.705E-01 | 2.133E-01 |
| DIRAS1     | 0.219 | 5.999E-01 | 8.146E-02 |
| NAT2       | 0.219 | 5.970E-01 | 5.789E-03 |
| NFATC4     | 0.219 | 2.372E-01 | 3.543E-03 |
| AC142391.1 | 0.219 | NA        | 6.081E-01 |
| CPLX1      | 0.219 | 3.084E-01 | 1.193E-04 |
| TC2N       | 0.219 | 2.561E-01 | 5.762E-02 |
| RHEB       | 0.219 | 1.214E-03 | 3.186E-01 |

|            |       |           |           |
|------------|-------|-----------|-----------|
| RASAL2     | 0.219 | 7.296E-02 | 1.950E-05 |
| SNX24      | 0.219 | 6.222E-02 | 2.602E-04 |
| DNAH14     | 0.219 | 2.185E-01 | 6.688E-03 |
| CRYBA4     | 0.218 | 6.126E-01 | 1.022E-01 |
| MIR554     | 0.218 | 6.188E-01 | 3.909E-02 |
| DENND4C    | 0.218 | 1.116E-01 | 8.807E-02 |
| SLC39A1    | 0.218 | 4.137E-03 | 1.074E-03 |
| THBS2      | 0.218 | 5.086E-01 | 6.085E-01 |
| CELF5      | 0.218 | 6.113E-01 | 3.360E-02 |
| HSPA12B    | 0.218 | 2.598E-01 | 2.553E-01 |
| SLC22A18AS | 0.218 | 3.495E-01 | 1.493E-02 |
| ARHGAP22   | 0.218 | 3.588E-01 | 6.938E-01 |
| CPLX4      | 0.218 | 6.598E-01 | 2.391E-02 |
| RBM46      | 0.218 | 7.551E-01 | 2.548E-04 |
| KHK        | 0.217 | 2.378E-01 | 6.996E-01 |
| CFAP65     | 0.217 | 6.887E-01 | 4.635E-04 |
| IL17RD     | 0.217 | 3.313E-01 | 2.560E-03 |
| UGT1A5     | 0.217 | 7.046E-01 | 1.459E-04 |
| XKR5       | 0.217 | 5.455E-01 | 5.150E-05 |
| TRH        | 0.217 | 5.749E-01 | 9.218E-02 |
| KANK3      | 0.217 | 2.141E-01 | 6.464E-01 |
| TUB        | 0.217 | 4.257E-01 | 1.389E-04 |
| MID2       | 0.217 | 7.523E-02 | 1.756E-01 |
| CCDC160    | 0.217 | 5.285E-01 | 3.395E-02 |
| SPATA32    | 0.216 | 2.917E-01 | 3.940E-02 |
| KLHL10     | 0.216 | 3.550E-01 | 3.637E-01 |
| CD14       | 0.216 | 5.026E-01 | 2.588E-01 |
| DIAPH3     | 0.216 | 2.299E-01 | 5.241E-01 |
| MAB21L2    | 0.216 | 6.991E-01 | 6.211E-01 |
| F11R       | 0.216 | 1.232E-01 | 1.348E-01 |
| TMEM245    | 0.216 | 1.636E-02 | 1.494E-02 |
| OSBP       | 0.216 | 3.894E-03 | 1.456E-01 |
| MT1G       | 0.216 | 5.577E-01 | 1.266E-01 |
| TMEM214    | 0.216 | 7.442E-04 | 3.304E-03 |
| C4orf47    | 0.216 | 3.138E-01 | 4.265E-04 |
| UHMK1      | 0.215 | 5.598E-02 | 5.026E-02 |
| ADAM15     | 0.215 | 7.126E-02 | 2.750E-01 |
| BRSK1      | 0.215 | 3.916E-01 | 3.820E-02 |
| TMEM11     | 0.215 | 2.888E-02 | 2.467E-01 |
| HABP4      | 0.215 | 1.345E-01 | 2.815E-01 |
| OPN3       | 0.215 | 2.712E-01 | 5.305E-03 |
| ST6GALNAC  | 0.215 | 3.136E-01 | 2.395E-01 |
| WDR49      | 0.215 | 6.099E-01 | 1.046E-01 |
| POPDC3     | 0.215 | 6.620E-01 | 7.130E-01 |
| FAM107A    | 0.215 | 5.093E-01 | 4.427E-01 |
| B4GALT3    | 0.215 | 1.032E-01 | 8.067E-02 |
| GALK1      | 0.215 | 6.364E-02 | 7.418E-01 |
| FTL        | 0.214 | 1.625E-01 | 6.820E-02 |
| CHST7      | 0.214 | 2.038E-01 | 6.652E-01 |
| S1PR1      | 0.214 | 2.730E-01 | 8.058E-01 |

|             |       |           |           |
|-------------|-------|-----------|-----------|
| CHODL       | 0.214 | 6.272E-01 | 2.486E-01 |
| FSF12-TNFSI | 0.214 | 5.516E-01 | 2.729E-01 |
| NKX3-1      | 0.214 | 2.821E-01 | 1.329E-01 |
| WRB         | 0.214 | 2.708E-02 | 1.427E-01 |
| C1orf198    | 0.214 | 4.997E-03 | 1.869E-01 |
| P3H3        | 0.214 | 3.608E-01 | 1.843E-01 |
| POU4F1      | 0.214 | 6.846E-01 | 6.466E-01 |
| TMED3       | 0.214 | 3.430E-02 | 1.050E-01 |
| SERPINB12   | 0.214 | 8.017E-01 | 1.212E-01 |
| COL19A1     | 0.214 | 6.761E-01 | 6.118E-02 |
| DMGDH       | 0.214 | 2.848E-01 | 1.163E-01 |
| HTRA3       | 0.214 | 5.361E-01 | 7.316E-03 |
| FAM72B      | 0.213 | 2.411E-01 | 9.828E-03 |
| CPZ         | 0.213 | 5.347E-01 | 7.433E-02 |
| CBY3        | 0.213 | 4.182E-01 | 1.162E-01 |
| PBX3        | 0.213 | 7.466E-02 | 3.092E-02 |
| DEFB126     | 0.213 | 7.135E-01 | 5.317E-03 |
| KLF6        | 0.213 | 1.464E-01 | 3.473E-01 |
| GATS        | 0.213 | 1.831E-01 | 1.691E-01 |
| ITGA1       | 0.213 | 2.201E-01 | 3.078E-04 |
| COPG1       | 0.213 | 4.831E-04 | 2.137E-02 |
| DUPD1       | 0.213 | 8.069E-01 | 3.626E-01 |
| BHLHB9      | 0.213 | 5.644E-02 | 9.088E-02 |
| POC4-APOC   | 0.213 | 6.106E-01 | 2.206E-01 |
| EDIL3       | 0.213 | 3.892E-01 | 1.199E-01 |
| CDKL2       | 0.213 | 4.889E-01 | 3.739E-04 |
| BCL6B       | 0.213 | 2.375E-01 | 2.492E-01 |
| PCDHB8      | 0.213 | 5.754E-01 | 3.834E-01 |
| MX2-CTNNE   | 0.212 | NA        | 2.186E-01 |
| PAK4        | 0.212 | 3.305E-02 | 2.729E-01 |
| PDE4DIP     | 0.212 | 6.262E-02 | 1.664E-01 |
| FGD3        | 0.212 | 3.286E-01 | 9.324E-04 |
| CMKLR1      | 0.212 | 5.243E-01 | 9.729E-03 |
| NBL1        | 0.212 | 3.042E-01 | 5.238E-02 |
| RBM24       | 0.212 | 5.469E-01 | 1.310E-02 |
| MCOLN3      | 0.212 | 6.016E-01 | 4.625E-01 |
| OXR1        | 0.212 | 9.201E-02 | 3.617E-01 |
| IFNL3       | 0.212 | 7.224E-01 | 5.410E-05 |
| AC136428.1  | 0.212 | 7.325E-01 | 1.996E-01 |
| STK31       | 0.211 | 3.995E-01 | 2.587E-01 |
| PLA2G15     | 0.211 | 5.418E-02 | 7.427E-03 |
| SYNDIG1L    | 0.211 | 5.853E-01 | 7.484E-01 |
| PTCRA       | 0.211 | 5.678E-01 | 4.233E-04 |
| MROH2B      | 0.211 | 6.915E-01 | 6.199E-02 |
| LAMP5       | 0.211 | 6.038E-01 | 2.008E-01 |
| MROH6       | 0.211 | 3.339E-01 | 1.443E-01 |
| NPFFR2      | 0.211 | 7.464E-01 | 3.929E-01 |
| PGA5        | 0.211 | 7.488E-01 | 8.330E-02 |
| BSCL2       | 0.211 | 1.943E-02 | 2.626E-01 |
| OR1L3       | 0.211 | NA        | 3.894E-02 |



|           |       |           |           |
|-----------|-------|-----------|-----------|
| PIM1      | 0.211 | 2.131E-01 | 5.531E-01 |
| CHAD      | 0.211 | 4.562E-01 | 4.358E-02 |
| PPP1R42   | 0.211 | 5.810E-01 | 4.411E-04 |
| HPCAL1    | 0.210 | 1.414E-01 | 1.266E-02 |
| HSD17B7   | 0.210 | 8.905E-02 | 1.490E-05 |
| ANGPT1    | 0.210 | 4.897E-01 | 3.240E-03 |
| APIP      | 0.210 | 3.200E-02 | 2.196E-02 |
| CLSTN2    | 0.210 | 5.434E-01 | 1.413E-02 |
| OR1L6     | 0.210 | NA        | 7.547E-02 |
| PARD3     | 0.210 | 3.272E-02 | 1.315E-02 |
| PXDC1     | 0.210 | 1.827E-01 | 9.482E-02 |
| SLC10A2   | 0.210 | 8.599E-01 | 6.753E-02 |
| CD33      | 0.210 | 4.746E-01 | 2.904E-02 |
| PLCH1     | 0.210 | 5.277E-01 | 7.639E-02 |
| VSTM4     | 0.209 | 3.379E-01 | 5.320E-03 |
| ESR2      | 0.209 | 2.956E-01 | 3.963E-02 |
| SLC11A1   | 0.209 | 3.894E-01 | 6.926E-01 |
| ANKRD24   | 0.209 | 3.686E-01 | 9.758E-02 |
| RNF225    | 0.209 | 5.764E-01 | 1.722E-01 |
| TMEFF2    | 0.209 | 6.930E-01 | 3.487E-01 |
| SEC22B    | 0.209 | 4.508E-03 | 4.150E-03 |
| CGB3      | 0.209 | 7.089E-01 | 2.860E-01 |
| ENPEP     | 0.209 | 3.054E-01 | 5.784E-02 |
| C1orf74   | 0.209 | 3.359E-01 | 2.036E-03 |
| CA3       | 0.209 | 5.386E-01 | 6.677E-01 |
| LCA5L     | 0.209 | 1.145E-01 | 1.081E-01 |
| SH3BGRL2  | 0.209 | 3.098E-01 | 8.345E-02 |
| PSMD3     | 0.209 | 1.620E-02 | 2.450E-01 |
| PNMA8B    | 0.209 | 3.841E-01 | 3.846E-01 |
| NEU1      | 0.209 | 7.065E-02 | 4.414E-01 |
| RD3L      | 0.208 | NA        | 2.492E-01 |
| MCUB      | 0.208 | 2.565E-01 | 3.238E-01 |
| NKIRAS1   | 0.208 | 1.457E-02 | 5.568E-02 |
| LRRC31    | 0.208 | 6.431E-01 | 3.525E-02 |
| L1CAM     | 0.208 | 7.050E-01 | 6.045E-01 |
| PPP6R3    | 0.208 | 2.054E-02 | 2.663E-01 |
| KDELC2    | 0.208 | 1.668E-01 | 7.235E-01 |
| PRTFDC1   | 0.208 | 4.120E-01 | 3.734E-02 |
| AAK1      | 0.207 | 1.298E-02 | 1.589E-02 |
| HFE       | 0.207 | 1.926E-01 | 7.171E-02 |
| ROR2      | 0.207 | 5.373E-01 | 2.143E-03 |
| OR51E2    | 0.207 | 4.885E-01 | 1.575E-01 |
| DYNC1H1   | 0.207 | 4.802E-01 | 7.650E-03 |
| GPX8      | 0.207 | 3.356E-01 | 6.065E-02 |
| SCUBE2    | 0.207 | 6.413E-01 | 6.899E-02 |
| 44078.000 | 0.207 | 2.173E-01 | 2.558E-03 |
| MISP      | 0.207 | 5.569E-01 | 3.084E-01 |
| C16orf46  | 0.207 | 9.753E-02 | 1.606E-01 |
| TRIM47    | 0.207 | 3.059E-01 | 2.084E-01 |
| ITGA5     | 0.206 | 3.973E-01 | 4.570E-02 |

|           |       |           |           |
|-----------|-------|-----------|-----------|
| MIR3202-1 | 0.206 | 6.985E-01 | 1.825E-01 |
| TMEM62    | 0.206 | 5.256E-02 | 5.808E-01 |
| ANKRD1    | 0.206 | 6.817E-01 | 7.804E-02 |
| PLA2G4C   | 0.206 | 4.137E-01 | 1.357E-03 |
| CAV2      | 0.206 | 3.736E-01 | 1.165E-02 |
| RUSC2     | 0.206 | 1.830E-01 | 4.767E-04 |
| GPM6A     | 0.206 | 6.338E-01 | 6.575E-04 |
| HIST1H3H  | 0.206 | 5.181E-01 | 5.601E-02 |
| RETN      | 0.206 | 5.806E-01 | 2.005E-01 |
| GPR17     | 0.206 | 5.380E-01 | 2.306E-01 |
| TCTEX1D2  | 0.206 | 2.356E-01 | 5.905E-01 |
| XYLB      | 0.206 | 2.195E-01 | 2.949E-01 |
| ANXA5     | 0.205 | 2.226E-01 | 4.595E-02 |
| PANK1     | 0.205 | 1.378E-01 | 1.634E-01 |
| LRRN2     | 0.205 | 5.579E-01 | 1.338E-01 |
| KSR1      | 0.205 | 2.455E-01 | 9.309E-03 |
| GSTM4     | 0.205 | 5.434E-01 | 4.634E-01 |
| DPEP1     | 0.205 | 6.063E-01 | 2.390E-04 |
| GUSB      | 0.205 | 6.675E-02 | 5.503E-03 |
| CHST1     | 0.205 | 4.271E-01 | 7.506E-03 |
| EPDR1     | 0.205 | 4.913E-01 | 3.578E-01 |
| ANKRD7    | 0.205 | 6.575E-01 | 1.706E-01 |
| FNDC1     | 0.205 | 6.532E-01 | 4.378E-02 |
| SIX3      | 0.205 | 7.257E-01 | 1.556E-03 |
| HSPB2     | 0.205 | 4.408E-01 | 2.399E-01 |
| TCF21     | 0.205 | 4.747E-01 | 1.589E-01 |
| ATP6V0A1  | 0.204 | 1.451E-02 | 1.492E-02 |
| MYH15     | 0.204 | 5.896E-01 | 2.657E-03 |
| COL5A1    | 0.204 | 5.056E-01 | 1.364E-04 |
| ZDHHC18   | 0.204 | 1.834E-02 | 8.941E-01 |
| TREM2     | 0.204 | 4.723E-01 | 1.297E-01 |
| FUT5      | 0.204 | NA        | 3.081E-03 |
| SLC46A3   | 0.204 | 2.836E-01 | 5.571E-02 |
| TOR1AIP2  | 0.204 | 8.087E-03 | 1.000E-01 |
| ANLN      | 0.204 | 2.763E-01 | 1.213E-01 |
| PDE1B     | 0.204 | 5.209E-01 | 1.376E-01 |
| RIBC1     | 0.204 | 1.689E-01 | 5.451E-01 |
| MIR4754   | 0.204 | 5.415E-01 | 7.138E-01 |
| MIR1289-1 | 0.204 | 7.800E-01 | 3.109E-01 |
| ICAM1     | 0.203 | 4.895E-01 | 6.141E-02 |
| TXLNB     | 0.203 | 4.517E-01 | 5.220E-02 |
| SLC16A13  | 0.203 | 1.380E-01 | 3.530E-03 |
| PLK2      | 0.203 | 3.566E-01 | 4.864E-02 |
| HEATR9    | 0.203 | 5.350E-01 | 5.550E-01 |
| HFE2      | 0.203 | 6.609E-01 | 2.179E-03 |
| ADAMTSL1  | 0.203 | 5.209E-01 | 1.997E-02 |
| CENPVL3   | 0.203 | 9.095E-01 | 2.033E-02 |
| RASGEF1A  | 0.203 | 5.322E-01 | 2.652E-01 |
| IRAK3     | 0.203 | 3.699E-01 | 3.238E-01 |
| SCN1B     | 0.202 | 4.261E-01 | 8.511E-02 |

|            |       |           |           |
|------------|-------|-----------|-----------|
| MFAP2      | 0.202 | 4.196E-01 | 4.097E-02 |
| ZSWIM5     | 0.202 | 4.306E-01 | 7.695E-01 |
| MXRA7      | 0.202 | 2.051E-01 | 1.442E-01 |
| IGFBP5     | 0.202 | 5.442E-01 | 1.155E-03 |
| ANXA4      | 0.202 | 7.388E-02 | 3.881E-01 |
| JADE3      | 0.202 | 7.447E-02 | 1.621E-03 |
| MFSD11     | 0.202 | 1.342E-02 | 8.202E-04 |
| TULP3      | 0.202 | 2.434E-02 | 1.420E-02 |
| AC010326.2 | 0.202 | 3.733E-01 | 6.045E-02 |
| CDX1       | 0.202 | 5.708E-01 | 3.925E-02 |
| VIT        | 0.202 | 7.404E-01 | 4.635E-02 |
| ABRA       | 0.202 | 5.684E-01 | 2.385E-03 |
| AL355916.3 | 0.202 | NA        | 2.267E-01 |
| MORC4      | 0.202 | 8.449E-02 | 4.466E-01 |
| ACTL7A     | 0.201 | NA        | 6.793E-01 |
| LILRA5     | 0.201 | 5.508E-01 | 6.720E-05 |
| PRPH2      | 0.201 | 4.592E-01 | 7.399E-02 |
| HMX3       | 0.201 | 8.397E-01 | 1.559E-01 |
| PPP1R3F    | 0.201 | 1.804E-01 | 1.048E-01 |
| OR6T1      | 0.201 | 6.964E-01 | 1.120E-07 |
| UPF2       | 0.201 | 1.217E-02 | 3.660E-01 |
| DAG1       | 0.201 | 7.916E-02 | 1.237E-01 |
| RRM2       | 0.201 | 2.653E-01 | 6.796E-01 |
| DEDD       | 0.201 | 7.242E-02 | 1.278E-02 |
| ANKH       | 0.201 | 3.578E-01 | 2.061E-01 |
| MIR4698    | 0.201 | NA        | 1.830E-07 |
| FAM149A    | 0.201 | 5.196E-01 | 4.186E-04 |
| POMT1      | 0.200 | 4.379E-02 | 6.638E-03 |
| MAP1B      | 0.200 | 4.660E-01 | 5.260E-01 |
| NAGK       | 0.200 | 4.228E-02 | 1.564E-01 |
| PTGDS      | 0.200 | 6.105E-01 | 1.787E-01 |
| AC003002.4 | 0.200 | 3.525E-01 | 1.634E-01 |
| PHLDB3     | 0.200 | 2.670E-01 | 3.941E-01 |
| CSPG4      | 0.200 | 4.735E-01 | 4.718E-03 |
| PPIL6      | 0.200 | 2.814E-01 | 2.612E-01 |
| MAP7D3     | 0.200 | 3.057E-01 | 1.674E-01 |
| RASA3      | 0.200 | 3.385E-01 | 1.197E-01 |
| ACTN2      | 0.200 | 6.647E-01 | 4.780E-02 |
| MYH13      | 0.200 | 6.324E-01 | 2.145E-01 |
| CCL17      | 0.200 | 5.208E-01 | 8.821E-02 |
| C11orf74   | 0.200 | 1.145E-01 | 2.054E-01 |
| CHRM3      | 0.199 | 6.244E-01 | 9.586E-02 |
| CRIM1      | 0.199 | 1.786E-01 | 3.470E-01 |
| BMP6       | 0.199 | 4.814E-01 | 5.361E-02 |
| MMD        | 0.199 | 3.115E-01 | 3.110E-01 |
| BBC3       | 0.199 | 1.734E-01 | 1.229E-02 |
| MSMO1      | 0.199 | 1.810E-01 | 2.642E-01 |
| PGA3       | 0.199 | NA        | 8.190E-06 |
| LCE6A      | 0.199 | NA        | 9.328E-01 |
| MALRD1     | 0.199 | 6.425E-01 | 1.763E-03 |

|            |       |           |           |
|------------|-------|-----------|-----------|
| KBTBD13    | 0.199 | 7.827E-01 | 2.630E-02 |
| MC1R       | 0.199 | 2.717E-01 | 3.804E-02 |
| CCL19      | 0.199 | 6.915E-01 | 2.794E-01 |
| MRAS       | 0.199 | 3.002E-01 | 4.568E-03 |
| RHBDL2     | 0.199 | 3.229E-01 | 1.430E-01 |
| CDSN       | 0.199 | 7.907E-01 | 2.829E-04 |
| OTOF       | 0.199 | 5.831E-01 | 1.488E-01 |
| CCDC144A   | 0.199 | 6.815E-01 | 3.270E-05 |
| RIM6-TRIM3 | 0.199 | NA        | 2.668E-03 |
| RSG1       | 0.198 | 4.681E-02 | 8.085E-02 |
| ODF3L2     | 0.198 | 5.411E-01 | 1.038E-01 |
| LPP        | 0.198 | 1.878E-01 | 7.892E-04 |
| PKD2L1     | 0.198 | 5.065E-01 | 2.936E-01 |
| PIK3CB     | 0.198 | 5.183E-02 | 1.238E-01 |
| NOTCH2     | 0.198 | 1.492E-01 | 3.637E-02 |
| SULF2      | 0.198 | 5.559E-01 | 3.155E-01 |
| EIF2AK3    | 0.198 | 7.104E-02 | 1.323E-01 |
| CPAMD8     | 0.198 | 5.556E-01 | 2.126E-01 |
| PROZ       | 0.198 | 4.763E-01 | 5.584E-02 |
| RND1       | 0.198 | 4.310E-01 | 6.223E-02 |
| MIR6078    | 0.197 | NA        | 3.776E-03 |
| RRM2B      | 0.197 | 1.573E-01 | 2.817E-01 |
| SEC24D     | 0.197 | 1.058E-01 | 4.680E-01 |
| MYOZ1      | 0.197 | 5.191E-01 | 1.783E-04 |
| TEN1       | 0.197 | 2.029E-01 | 3.911E-02 |
| TBXA2R     | 0.197 | 3.174E-01 | 2.967E-02 |
| EXOC4      | 0.197 | 2.017E-03 | 6.423E-01 |
| KIF3C      | 0.197 | 1.794E-01 | 6.686E-04 |
| NCOA2      | 0.197 | 6.544E-02 | 3.152E-01 |
| MIR1276    | 0.197 | 7.084E-01 | 8.416E-01 |
| P2RX5      | 0.197 | 5.776E-01 | 6.857E-03 |
| TIMP1      | 0.197 | 3.966E-01 | 1.797E-01 |
| MIR548K    | 0.196 | NA        | 6.589E-03 |
| FAXDC2     | 0.196 | 3.080E-01 | 3.779E-02 |
| 44085.000  | 0.196 | 4.589E-02 | 2.920E-01 |
| NFATC1     | 0.196 | 3.958E-01 | 3.381E-01 |
| KRBOX1     | 0.196 | 6.310E-01 | 1.529E-03 |
| AMER3      | 0.196 | 7.754E-01 | 1.796E-01 |
| AC087632.1 | 0.196 | 3.059E-01 | 1.262E-01 |
| SCML2      | 0.196 | 5.829E-01 | 5.373E-01 |
| NREP       | 0.196 | 3.489E-01 | 5.300E-06 |
| ATL3       | 0.196 | 8.550E-02 | 6.295E-01 |
| POR        | 0.196 | 4.395E-02 | 1.775E-01 |
| PDE11A     | 0.196 | 5.772E-01 | 1.190E-05 |
| FSHR       | 0.196 | 8.541E-01 | 3.954E-01 |
| GJC1       | 0.196 | 3.396E-01 | 5.559E-01 |
| ZBTB38     | 0.196 | 7.699E-02 | 2.070E-01 |
| SERINC5    | 0.196 | 1.906E-01 | 9.707E-02 |
| RAB5A      | 0.195 | 9.859E-03 | 4.367E-03 |
| C4orf36    | 0.195 | 4.975E-02 | 1.928E-01 |

|            |       |           |           |
|------------|-------|-----------|-----------|
| LETM2      | 0.195 | 3.217E-01 | 1.936E-01 |
| DNAJC5B    | 0.195 | 5.933E-01 | 7.658E-02 |
| SLC9C2     | 0.195 | 7.185E-01 | 1.655E-01 |
| ADAMTS2    | 0.195 | 5.290E-01 | 7.624E-02 |
| RGS5       | 0.195 | 4.490E-01 | 2.277E-01 |
| FAM114A1   | 0.195 | 5.040E-02 | 2.071E-01 |
| B3GNT2     | 0.195 | 4.004E-02 | 5.733E-02 |
| OR5I1      | 0.195 | NA        | 7.188E-02 |
| MMP2       | 0.195 | 4.720E-01 | 5.313E-01 |
| L1TD1      | 0.195 | 6.081E-01 | 1.001E-01 |
| GLIPR1     | 0.195 | 3.916E-01 | 1.602E-03 |
| DCAF6      | 0.195 | 5.244E-02 | 1.728E-01 |
| PHKG1      | 0.194 | 2.817E-01 | 9.476E-02 |
| C11orf80   | 0.194 | 1.530E-01 | 2.933E-01 |
| TMSB15B    | 0.194 | 4.746E-01 | 6.843E-02 |
| TMEM136    | 0.194 | 2.606E-01 | 1.570E-02 |
| VMO1       | 0.194 | 5.306E-01 | 3.406E-02 |
| ABCA12     | 0.194 | 6.398E-01 | 3.330E-05 |
| RFTN2      | 0.194 | 2.113E-01 | 1.407E-01 |
| PRSS3      | 0.194 | 6.842E-01 | 2.164E-01 |
| NXF5       | 0.194 | 8.360E-01 | 1.491E-03 |
| CRLF1      | 0.194 | 4.891E-01 | 5.473E-02 |
| NKX3-2     | 0.194 | 6.059E-01 | 1.060E-03 |
| PLAC1      | 0.194 | 6.324E-01 | 1.189E-01 |
| SEMG1      | 0.194 | 8.070E-01 | 8.769E-03 |
| NFIC       | 0.193 | 1.219E-01 | 2.267E-03 |
| STARD13    | 0.193 | 3.172E-01 | 1.172E-03 |
| ZMYND12    | 0.193 | 4.010E-01 | 8.015E-04 |
| SVEP1      | 0.193 | 3.904E-01 | 8.172E-01 |
| PODXL      | 0.193 | 3.025E-01 | 8.680E-02 |
| NOTCH2NL   | 0.193 | 2.916E-01 | 6.180E-04 |
| SPATA17    | 0.193 | 4.522E-01 | 2.509E-01 |
| TNFRSF11B  | 0.193 | 5.993E-01 | 2.778E-03 |
| B4GAT1     | 0.193 | 6.472E-02 | 4.157E-01 |
| JADE1      | 0.192 | 1.621E-01 | 4.252E-01 |
| FGFR1      | 0.192 | 4.756E-01 | 8.960E-02 |
| ZMAT3      | 0.192 | 1.258E-01 | 9.229E-02 |
| ADAMTS15   | 0.192 | 5.959E-01 | 1.808E-02 |
| AL138752.2 | 0.192 | 4.608E-01 | 5.727E-02 |
| PALM       | 0.192 | 5.413E-01 | 1.734E-01 |
| TNFRSF11A  | 0.192 | 4.553E-01 | 4.558E-01 |
| HIST1H2AM  | 0.192 | 4.895E-01 | 7.065E-01 |
| C17orf50   | 0.192 | 5.896E-01 | 4.081E-03 |
| FAM198B    | 0.192 | 3.100E-01 | 5.380E-01 |
| GPSM2      | 0.192 | 1.984E-01 | 1.046E-04 |
| NMBR       | 0.192 | 6.324E-01 | 1.914E-01 |
| PCSK7      | 0.192 | 8.486E-02 | 1.815E-01 |
| TGIF2LX    | 0.192 | 8.834E-01 | 3.712E-02 |
| FGD1       | 0.192 | 1.898E-01 | 6.266E-01 |
| PFN4       | 0.192 | 2.392E-01 | 1.092E-01 |

|            |       |           |           |
|------------|-------|-----------|-----------|
| MIR130A    | 0.191 | NA        | 7.402E-02 |
| CT47B1     | 0.191 | NA        | 9.520E-02 |
| MAST2      | 0.191 | 9.095E-02 | 7.488E-03 |
| MCFD2      | 0.191 | 5.331E-02 | 1.816E-01 |
| ZSCAN1     | 0.191 | 7.152E-01 | 2.035E-01 |
| PLD3       | 0.191 | 1.091E-01 | 5.095E-02 |
| NWD1       | 0.191 | 6.419E-01 | 2.840E-02 |
| NIPA1      | 0.191 | 2.501E-01 | 3.413E-03 |
| CBX6       | 0.191 | 3.075E-01 | 4.307E-01 |
| AC008750.8 | 0.191 | 3.472E-01 | 2.513E-03 |
| HEPH       | 0.191 | 5.168E-01 | 7.891E-02 |
| CTSA       | 0.191 | 7.551E-02 | 9.331E-03 |
| MIR6512    | 0.191 | 7.347E-01 | 6.520E-01 |
| EPAS1      | 0.190 | 2.370E-01 | 1.827E-01 |
| HIST2H2BF  | 0.190 | 5.201E-01 | 1.155E-02 |
| BASP1      | 0.190 | 4.988E-01 | 3.217E-02 |
| ZFHX3      | 0.190 | 2.000E-01 | 2.485E-01 |
| MBTPS2     | 0.190 | 4.399E-02 | 1.654E-01 |
| FEV        | 0.190 | 7.781E-01 | 5.235E-02 |
| IGFBP7     | 0.190 | 2.814E-01 | 5.200E-02 |
| MPZL1      | 0.190 | 6.891E-02 | 1.050E-05 |
| MAPK3      | 0.190 | 4.188E-02 | 3.590E-02 |
| ADAM19     | 0.190 | 5.467E-01 | 5.424E-01 |
| B3GALT5    | 0.190 | 7.037E-01 | 3.332E-01 |
| CXorf58    | 0.190 | 5.711E-01 | 2.314E-02 |
| FCGR1B     | 0.189 | 6.058E-01 | 8.190E-05 |
| ARF4       | 0.189 | 2.551E-02 | 1.065E-01 |
| ELSPBP1    | 0.189 | 8.539E-01 | 1.714E-01 |
| RPTN       | 0.189 | 8.217E-01 | 1.612E-02 |
| PLA2G1B    | 0.189 | 5.624E-01 | 3.205E-02 |
| SLC16A2    | 0.189 | 4.617E-01 | 1.122E-02 |
| GUCY2C     | 0.189 | 3.251E-01 | 2.481E-01 |
| ADRA2B     | 0.189 | 5.455E-01 | 7.006E-04 |
| FBXW10     | 0.189 | 6.136E-01 | 7.909E-02 |
| CDKN1C     | 0.189 | 4.803E-01 | 3.980E-03 |
| CD9        | 0.189 | 1.811E-01 | 1.754E-01 |
| DUSP12     | 0.189 | 8.209E-02 | 3.738E-01 |
| ZNF329     | 0.188 | 1.186E-01 | 1.836E-04 |
| KDEL2      | 0.188 | 1.186E-02 | 1.705E-01 |
| MAATS1     | 0.188 | 6.351E-01 | 6.611E-02 |
| GRM7       | 0.188 | 7.010E-01 | 4.526E-01 |
| USP43      | 0.188 | 2.120E-01 | 3.984E-02 |
| DNMT3L     | 0.188 | 8.201E-01 | 3.108E-02 |
| DNAJB9     | 0.188 | 4.402E-02 | 6.989E-01 |
| CDIPT      | 0.188 | 1.558E-02 | 9.067E-02 |
| CDC42EP2   | 0.188 | 3.213E-01 | 4.960E-04 |
| MIR6821    | 0.188 | NA        | 5.715E-02 |
| HIRIP3     | 0.188 | 7.098E-02 | 1.249E-01 |
| CCDC121    | 0.187 | 1.234E-01 | 1.291E-01 |
| PNMA2      | 0.187 | 5.508E-01 | 4.427E-02 |

|            |       |           |           |
|------------|-------|-----------|-----------|
| DYSF       | 0.187 | 3.139E-01 | 5.330E-05 |
| IL1RAPL2   | 0.187 | 6.419E-01 | 6.099E-01 |
| FOXF1      | 0.187 | 4.933E-01 | 9.275E-02 |
| SLC12A3    | 0.187 | 6.116E-01 | 4.036E-01 |
| NUCB2      | 0.187 | 7.921E-02 | 4.489E-02 |
| CFAP99     | 0.187 | 5.540E-01 | 4.446E-01 |
| CRY2       | 0.187 | 3.081E-02 | 6.718E-01 |
| AK8        | 0.187 | 4.327E-01 | 5.844E-03 |
| ZNF382     | 0.187 | 4.577E-01 | 1.794E-01 |
| AL928654.4 | 0.187 | 6.396E-01 | 3.450E-01 |
| XK         | 0.187 | 5.593E-01 | 6.026E-03 |
| SMPD1      | 0.187 | 1.362E-01 | 2.907E-01 |
| SYT1       | 0.187 | 5.762E-01 | 3.656E-04 |
| ECM2       | 0.187 | 4.392E-01 | 1.082E-04 |
| QSER1      | 0.187 | 1.227E-01 | 7.863E-01 |
| SLC22A15   | 0.186 | 3.056E-01 | 5.306E-02 |
| CCDC87     | 0.186 | 3.736E-01 | 2.652E-01 |
| ZNF185     | 0.186 | 3.946E-01 | 4.498E-01 |
| DDAH1      | 0.186 | 3.922E-01 | 3.049E-01 |
| ADGRB2     | 0.186 | 4.633E-01 | 5.784E-01 |
| NOS3       | 0.186 | 2.848E-01 | 3.670E-02 |
| RELL1      | 0.186 | 2.836E-01 | 1.500E-04 |
| FAM124A    | 0.186 | 4.681E-01 | 1.121E-01 |
| MIR641     | 0.186 | 6.664E-01 | 4.550E-01 |
| A4GNT      | 0.186 | 6.513E-01 | 1.776E-01 |
| NXF2B      | 0.186 | NA        | 1.909E-01 |
| MIR6855    | 0.186 | NA        | 1.750E-04 |
| GPRIN2     | 0.186 | 5.856E-01 | 3.493E-01 |
| ESPN       | 0.186 | 5.783E-01 | 3.828E-01 |
| FSD1L      | 0.186 | 4.629E-01 | 1.164E-02 |
| MICAL2     | 0.186 | 3.280E-01 | 8.398E-01 |
| TMEM41A    | 0.186 | 3.999E-02 | 9.398E-03 |
| MMP17      | 0.186 | 5.229E-01 | 9.404E-03 |
| FASN       | 0.185 | 2.556E-01 | 1.500E-01 |
| ERICH5     | 0.185 | 6.231E-01 | 1.627E-03 |
| NUAK1      | 0.185 | 4.159E-01 | 6.686E-01 |
| PLSCR5     | 0.185 | NA        | 1.201E-02 |
| RPN1       | 0.185 | 4.774E-03 | 1.795E-03 |
| ZDHHC9     | 0.185 | 3.292E-02 | 1.191E-01 |
| VSX1       | 0.185 | 7.415E-01 | 3.956E-03 |
| TMEM158    | 0.185 | 5.194E-01 | 5.707E-03 |
| TSPAN9     | 0.185 | 1.615E-01 | 3.078E-02 |
| CAST       | 0.185 | 1.452E-01 | 1.194E-01 |
| MIR6783    | 0.185 | NA        | 8.030E-06 |
| ZAR1       | 0.185 | 7.172E-01 | 6.471E-01 |
| GNAT2      | 0.185 | NA        | 1.207E-04 |
| ITGB1      | 0.185 | 2.134E-01 | 2.724E-01 |
| RAB20      | 0.185 | 2.419E-01 | 7.509E-03 |
| CATSPERD   | 0.185 | 6.728E-01 | 7.741E-01 |
| RNF148     | 0.184 | 5.551E-01 | 3.774E-04 |

|            |       |           |           |
|------------|-------|-----------|-----------|
| P4HB       | 0.184 | 2.178E-02 | 4.964E-01 |
| AMIGO1     | 0.184 | 2.543E-01 | 5.756E-01 |
| EPHA10     | 0.184 | 6.339E-01 | 9.350E-02 |
| SMIM3      | 0.184 | 3.081E-01 | 2.113E-01 |
| NKAPL      | 0.184 | 5.070E-01 | 3.525E-01 |
| LRRC2      | 0.184 | 6.425E-01 | 1.417E-01 |
| RNASE9     | 0.184 | NA        | 1.100E-01 |
| CFD        | 0.184 | 5.664E-01 | 6.566E-01 |
| MIR199A2   | 0.184 | NA        | 5.577E-01 |
| EXO5       | 0.184 | 7.118E-02 | 2.717E-01 |
| SEMA5A     | 0.184 | 5.765E-01 | 5.562E-01 |
| ZNF727     | 0.184 | 7.283E-01 | 8.755E-03 |
| LDLR       | 0.184 | 4.216E-01 | 8.274E-01 |
| ADAM8      | 0.183 | 3.973E-01 | 7.167E-01 |
| EPHA2      | 0.183 | 3.504E-01 | 6.738E-01 |
| PPP1R36    | 0.183 | 4.388E-01 | 4.697E-03 |
| ATP6V1C1   | 0.183 | 5.303E-02 | 2.195E-01 |
| ENC1       | 0.183 | 2.104E-01 | 1.543E-01 |
| FIBCD1     | 0.183 | 6.384E-01 | 7.208E-02 |
| GNAQ       | 0.183 | 1.142E-01 | 1.528E-01 |
| ITGB5      | 0.183 | 2.684E-01 | 3.372E-01 |
| PDIA6      | 0.183 | 1.108E-01 | 1.447E-01 |
| APOC1      | 0.183 | 5.239E-01 | 1.548E-03 |
| AC135050.2 | 0.183 | 3.954E-01 | 2.274E-01 |
| CDK16      | 0.183 | 3.122E-02 | 8.907E-01 |
| SOAT2      | 0.183 | 6.285E-01 | 3.184E-03 |
| HESX1      | 0.183 | 2.310E-01 | 3.785E-01 |
| ZNF347     | 0.183 | 1.896E-01 | 1.440E-06 |
| CAPN5      | 0.183 | 5.412E-01 | 1.089E-01 |
| GPT2       | 0.183 | 3.172E-01 | 2.254E-01 |
| KCNS1      | 0.183 | 6.609E-01 | 4.915E-01 |
| NECAB3     | 0.183 | 1.571E-01 | 4.251E-01 |
| BRK1       | 0.183 | 5.676E-02 | 6.539E-01 |
| ANKRD31    | 0.183 | 3.840E-01 | 3.419E-03 |
| GPR150     | 0.183 | 4.920E-01 | 8.940E-05 |
| C1S        | 0.182 | 5.336E-01 | 3.838E-03 |
| OTUD1      | 0.182 | 2.615E-01 | 3.946E-01 |
| C19orf68   | 0.182 | 4.698E-02 | 7.324E-02 |
| FN3K       | 0.182 | 2.598E-01 | 3.810E-01 |
| CNTLN      | 0.182 | 4.804E-01 | 4.550E-03 |
| LOX        | 0.182 | 5.201E-01 | 4.089E-01 |
| TCEAL4     | 0.182 | 5.089E-02 | 5.271E-01 |
| CXorf56    | 0.182 | 7.409E-03 | 1.034E-01 |
| LRFN5      | 0.182 | 6.634E-01 | 6.441E-04 |
| PBXIP1     | 0.182 | 1.132E-01 | 2.468E-01 |
| TMEM253    | 0.182 | 5.208E-01 | 7.742E-01 |
| SNAP25     | 0.181 | 6.198E-01 | 3.530E-01 |
| CPEB4      | 0.181 | 1.810E-01 | 7.491E-02 |
| CAPN2      | 0.181 | 2.575E-01 | 3.813E-01 |
| GRK5       | 0.181 | 2.497E-01 | 2.066E-01 |



|            |       |           |           |
|------------|-------|-----------|-----------|
| C16orf96   | 0.181 | 5.829E-01 | 3.979E-01 |
| AZIN1      | 0.181 | 1.090E-01 | 3.340E-03 |
| S100A9     | 0.181 | 7.080E-01 | 2.020E-01 |
| LRIG1      | 0.181 | 5.402E-01 | 7.060E-03 |
| UBQLN3     | 0.181 | NA        | 4.067E-01 |
| NOX4       | 0.181 | 4.576E-01 | 3.650E-01 |
| IFT122     | 0.181 | 5.280E-02 | 6.713E-02 |
| KIF19      | 0.181 | 5.467E-01 | 2.870E-01 |
| CPE        | 0.181 | 4.746E-01 | 2.370E-01 |
| SLC39A13   | 0.181 | 9.353E-02 | 4.148E-01 |
| GPAT3      | 0.180 | 5.643E-01 | 3.326E-02 |
| LRRC59     | 0.180 | 4.428E-02 | 2.540E-01 |
| DHH        | 0.180 | 5.236E-01 | 1.543E-01 |
| FCN1       | 0.180 | 5.996E-01 | 8.522E-01 |
| TPSD1      | 0.180 | 7.280E-01 | 7.789E-02 |
| ACSBG1     | 0.180 | 6.931E-01 | 4.218E-01 |
| ACBD3      | 0.180 | 2.342E-02 | 3.538E-01 |
| DUSP8      | 0.180 | 4.366E-01 | 1.094E-01 |
| LINC00694  | 0.180 | 6.088E-01 | 2.474E-01 |
| SGCG       | 0.180 | 7.172E-01 | 1.319E-02 |
| EVPL       | 0.180 | 4.293E-01 | 8.569E-02 |
| TIGD4      | 0.180 | 3.493E-01 | 7.780E-02 |
| SYCE1L     | 0.180 | 5.169E-01 | 1.007E-01 |
| TBX4       | 0.180 | 6.732E-01 | 3.318E-01 |
| BRF2       | 0.180 | 2.202E-01 | 6.074E-01 |
| ADCY9      | 0.179 | 2.640E-01 | 2.347E-02 |
| MMGT1      | 0.179 | 6.893E-02 | 9.797E-03 |
| C7orf73    | 0.179 | 2.828E-02 | 1.434E-02 |
| CXCL6      | 0.179 | 7.125E-01 | 7.930E-01 |
| NPW        | 0.179 | 6.378E-01 | 5.895E-02 |
| EPN3       | 0.179 | 4.321E-01 | 5.188E-02 |
| TRAM2      | 0.179 | 2.162E-01 | 2.473E-01 |
| LDHAL6B    | 0.179 | 5.030E-01 | 4.023E-02 |
| FAM43B     | 0.179 | 5.732E-01 | 1.784E-01 |
| STK32C     | 0.179 | 2.551E-01 | 2.224E-01 |
| CRHBP      | 0.179 | 6.128E-01 | 1.504E-01 |
| ARHGAP23   | 0.179 | 2.717E-01 | 8.920E-02 |
| HOOK3      | 0.179 | 6.902E-02 | 5.565E-01 |
| MIR219A1   | 0.179 | 5.568E-01 | 1.110E-03 |
| GPD1L      | 0.179 | 4.312E-01 | 1.252E-01 |
| AC013394.1 | 0.179 | 2.889E-01 | 7.782E-02 |
| METTL24    | 0.179 | 6.300E-01 | 1.681E-03 |
| HIST3H3    | 0.179 | 6.842E-01 | 3.321E-02 |
| DIP2C      | 0.179 | 1.655E-01 | 6.998E-02 |
| CYB561     | 0.178 | 5.841E-02 | 7.657E-03 |
| TBC1D9     | 0.178 | 2.255E-01 | 2.080E-03 |
| OR1M1      | 0.178 | NA        | 6.124E-01 |
| ALDH3A2    | 0.178 | 3.365E-01 | 5.810E-01 |
| ZNF436     | 0.178 | 2.571E-01 | 6.106E-01 |
| PAFAH2     | 0.178 | 4.258E-02 | 2.913E-04 |

|            |       |           |           |
|------------|-------|-----------|-----------|
| ARIH2OS    | 0.178 | 1.494E-01 | 1.507E-01 |
| ELOVL1     | 0.178 | 7.028E-02 | 3.749E-01 |
| GABRB3     | 0.178 | 7.404E-01 | 2.471E-02 |
| FUT9       | 0.178 | 7.174E-01 | 1.555E-01 |
| PIAS3      | 0.178 | 1.134E-01 | 1.834E-03 |
| SCPEP1     | 0.178 | 3.970E-01 | 2.347E-02 |
| AF130351.1 | 0.178 | 6.387E-01 | 5.333E-01 |
| AL162231.1 | 0.178 | 3.878E-01 | 8.974E-04 |
| TSC22D1    | 0.178 | 2.061E-01 | 6.599E-01 |
| GOLGA2     | 0.178 | 2.178E-02 | 7.541E-02 |
| ICMT       | 0.178 | 6.005E-03 | 7.617E-02 |
| KRTAP16-1  | 0.178 | 7.867E-01 | 6.192E-01 |
| NCAPG2     | 0.178 | 2.135E-01 | 8.373E-01 |
| AINOS1-NBL | 0.178 | 6.336E-01 | 5.170E-06 |
| FOXD2      | 0.177 | 4.931E-01 | 5.961E-01 |
| LEP        | 0.177 | 7.656E-01 | 4.086E-02 |
| DMRT1      | 0.177 | 8.001E-01 | 4.751E-04 |
| FRG2       | 0.177 | 8.599E-01 | 4.738E-02 |
| FAM46B     | 0.177 | 6.298E-01 | 2.151E-03 |
| CACNA2D4   | 0.177 | 3.815E-01 | 2.809E-01 |
| HIST1H2AI  | 0.177 | 5.985E-01 | 6.695E-03 |
| C19orf33   | 0.177 | 4.905E-01 | 5.947E-02 |
| TFDP3      | 0.177 | NA        | 1.221E-02 |
| TNFSF12    | 0.177 | 2.632E-01 | 2.917E-01 |
| MIR125B1   | 0.177 | NA        | 6.971E-01 |
| STX3       | 0.177 | 1.985E-01 | 4.704E-02 |
| BRPF1      | 0.177 | 3.570E-02 | 1.908E-01 |
| STT3B      | 0.177 | 3.668E-02 | 8.671E-02 |
| CPXM1      | 0.177 | 6.002E-01 | 1.234E-01 |
| ADARB1     | 0.177 | 3.968E-01 | 1.255E-01 |
| IL17RC     | 0.177 | 1.458E-01 | 6.528E-02 |
| PDRG1      | 0.177 | 7.723E-02 | 1.603E-01 |
| 44086.000  | 0.176 | 6.647E-01 | 5.339E-02 |
| GATA6      | 0.176 | 5.414E-01 | 1.448E-02 |
| BAIAP2     | 0.176 | 3.060E-01 | 4.649E-01 |
| PRSS23     | 0.176 | 4.170E-01 | 9.372E-01 |
| PRR16      | 0.176 | 5.316E-01 | 9.217E-01 |
| WDR78      | 0.176 | 3.187E-01 | 1.525E-03 |
| PMP22      | 0.176 | 5.058E-01 | 4.750E-02 |
| IL31RA     | 0.176 | 7.377E-01 | 5.822E-02 |
| PRSS54     | 0.176 | 7.759E-01 | 8.225E-02 |
| ESYT3      | 0.176 | 5.436E-01 | 9.791E-02 |
| CTRC       | 0.176 | 5.402E-01 | 5.180E-01 |
| EBF2       | 0.176 | 5.516E-01 | 7.142E-02 |
| MIR3149    | 0.176 | 7.029E-01 | 2.640E-02 |
| CAPRIN1    | 0.176 | 6.530E-02 | 1.967E-04 |
| KIAA2012   | 0.176 | 6.004E-01 | 5.494E-01 |
| TMCC1      | 0.176 | 2.542E-02 | 3.699E-02 |
| YPEL2      | 0.176 | 1.675E-01 | 7.452E-01 |
| LDB2       | 0.176 | 3.433E-01 | 7.520E-02 |

|           |       |           |           |
|-----------|-------|-----------|-----------|
| HRH1      | 0.176 | 3.217E-01 | 1.095E-01 |
| ZIK1      | 0.176 | 5.064E-01 | 6.965E-02 |
| MRPL33    | 0.176 | 5.331E-02 | 1.649E-03 |
| CD300LB   | 0.176 | 5.473E-01 | 2.938E-01 |
| STON1     | 0.175 | 4.345E-01 | 4.037E-01 |
| SRGAP2    | 0.175 | 5.998E-02 | 5.027E-01 |
| DCBLD2    | 0.175 | 5.263E-01 | 2.647E-01 |
| EPHA1     | 0.175 | 3.483E-01 | 7.244E-02 |
| CFAP43    | 0.175 | 4.360E-01 | 8.090E-01 |
| C3orf20   | 0.175 | 6.076E-01 | 5.359E-02 |
| CASC4     | 0.175 | 6.012E-02 | 8.748E-03 |
| SERPINF1  | 0.175 | 5.490E-01 | 7.236E-02 |
| TALDO1    | 0.175 | 1.435E-01 | 1.782E-01 |
| WDR34     | 0.175 | 2.575E-01 | 3.575E-01 |
| EFCAB12   | 0.175 | 4.611E-01 | 3.801E-04 |
| MAGED1    | 0.175 | 2.511E-01 | 7.275E-03 |
| FCER1G    | 0.175 | 5.764E-01 | 7.946E-01 |
| CLEC2L    | 0.175 | 7.806E-01 | 2.287E-03 |
| ARHGEF10  | 0.175 | 2.556E-01 | 6.836E-03 |
| CCDC102B  | 0.175 | 3.227E-01 | 4.327E-01 |
| PROS1     | 0.175 | 4.173E-01 | 3.533E-02 |
| WLS       | 0.175 | 4.065E-01 | 4.022E-01 |
| ATG7      | 0.175 | 7.285E-02 | 1.055E-03 |
| TMEM108   | 0.175 | 6.559E-01 | 1.830E-02 |
| PLA2G4A   | 0.175 | 4.931E-01 | 2.239E-03 |
| C11orf91  | 0.174 | 5.272E-01 | 1.716E-01 |
| BRDT      | 0.174 | 7.953E-01 | 4.691E-01 |
| DEFB125   | 0.174 | NA        | 1.827E-01 |
| LURAP1L   | 0.174 | 4.398E-01 | 2.051E-01 |
| DSCR3     | 0.174 | 1.654E-02 | 2.034E-01 |
| NR1D2     | 0.174 | 9.503E-02 | 5.929E-02 |
| ZSCAN23   | 0.174 | 5.942E-01 | 1.453E-02 |
| VAT1      | 0.174 | 7.388E-02 | 3.516E-01 |
| TCEA2     | 0.174 | 1.616E-01 | 1.155E-01 |
| FAM84A    | 0.174 | 5.997E-01 | 1.255E-01 |
| BDKRB2    | 0.174 | 4.560E-01 | 4.318E-03 |
| DUSP23    | 0.174 | 3.267E-01 | 5.990E-01 |
| EPS8L1    | 0.174 | 4.889E-01 | 1.090E-03 |
| PHF13     | 0.174 | 1.030E-02 | 1.762E-01 |
| PDLIM2    | 0.174 | 3.278E-01 | 4.389E-01 |
| BCL2L1    | 0.174 | 1.742E-01 | 7.098E-02 |
| TPGS1     | 0.174 | 3.314E-01 | 2.427E-02 |
| CLDN16    | 0.174 | 6.096E-01 | 3.201E-03 |
| PRDX4     | 0.174 | 1.459E-01 | 1.743E-01 |
| ADCYAP1R1 | 0.174 | 6.513E-01 | 7.211E-02 |
| HMG2      | 0.174 | 1.132E-01 | 2.502E-03 |
| CCDC186   | 0.173 | 8.507E-02 | 1.185E-03 |
| CHAC1     | 0.173 | 4.216E-01 | 3.256E-03 |
| GLCE      | 0.173 | 1.947E-01 | 3.857E-01 |
| CENPA     | 0.173 | 3.348E-01 | 3.832E-01 |

|           |       |           |           |
|-----------|-------|-----------|-----------|
| CLGN      | 0.173 | 6.543E-01 | 6.110E-01 |
| ZNF418    | 0.173 | 5.586E-01 | 7.033E-04 |
| PPP1CB    | 0.173 | 1.690E-02 | 4.395E-02 |
| C10orf128 | 0.173 | 4.778E-01 | 1.950E-03 |
| SC5D      | 0.173 | 3.524E-01 | 7.328E-02 |
| AADAC     | 0.173 | 7.827E-01 | 1.429E-01 |
| FRZB      | 0.173 | 5.032E-01 | 1.280E-01 |
| COX7B2    | 0.173 | 8.772E-01 | 5.841E-04 |
| TRIM9     | 0.173 | 6.234E-01 | 5.910E-01 |
| NKX1-2    | 0.173 | 8.092E-01 | 3.257E-01 |
| HIST1H1E  | 0.173 | 5.412E-01 | 1.382E-01 |
| FZD1      | 0.173 | 3.500E-01 | 3.765E-01 |
| MIR4653   | 0.173 | 4.017E-01 | 4.030E-01 |
| CCSER2    | 0.173 | 3.638E-02 | 9.621E-03 |
| BLVRB     | 0.173 | 2.482E-01 | 2.922E-01 |
| CDON      | 0.173 | 5.484E-01 | 4.715E-01 |
| GPRC5A    | 0.172 | 5.576E-01 | 1.953E-01 |
| PSAP      | 0.172 | 1.620E-01 | 4.536E-01 |
| OR11G2    | 0.172 | NA        | 4.675E-01 |
| LRRN3     | 0.172 | 5.753E-01 | 1.389E-04 |
| SLC17A7   | 0.172 | 5.404E-01 | 1.945E-02 |
| GOLGA8M   | 0.172 | 6.251E-01 | 6.048E-01 |
| SLFN11    | 0.172 | 5.208E-01 | 1.028E-02 |
| TMX4      | 0.172 | 1.394E-01 | 5.968E-02 |
| CAPZA2    | 0.172 | 2.965E-02 | 3.938E-01 |
| USP46     | 0.172 | 1.678E-01 | 7.065E-04 |
| TNPO3     | 0.172 | 6.005E-03 | 1.171E-02 |
| ADM5      | 0.171 | 4.405E-01 | 1.363E-01 |
| BCAR3     | 0.171 | 3.126E-01 | 9.326E-03 |
| TEX49     | 0.171 | 7.609E-01 | 3.230E-03 |
| RTL8C     | 0.171 | 1.243E-01 | 8.349E-01 |
| LATS2     | 0.171 | 2.328E-01 | 4.069E-03 |
| KLK7      | 0.171 | 8.470E-01 | 2.426E-01 |
| GOLM1     | 0.171 | 2.574E-01 | 1.192E-01 |
| WWTR1     | 0.171 | 2.648E-01 | 9.504E-02 |
| ATP11B    | 0.171 | 1.704E-01 | 3.309E-02 |
| COL5A3    | 0.170 | 5.387E-01 | 3.804E-01 |
| TEX261    | 0.170 | 8.207E-03 | 3.145E-01 |
| C11orf71  | 0.170 | 2.260E-01 | 1.636E-01 |
| NUCB1     | 0.170 | 3.871E-02 | 2.545E-01 |
| SV2B      | 0.170 | 7.057E-01 | 5.991E-04 |
| FBXO43    | 0.170 | 5.102E-01 | 1.571E-01 |
| OPRPN     | 0.170 | NA        | 7.972E-03 |
| BCL3      | 0.169 | 2.641E-01 | 2.348E-03 |
| C20orf144 | 0.169 | 2.508E-01 | 8.057E-01 |
| SLC35F6   | 0.169 | 5.768E-02 | 1.532E-02 |
| CENPU     | 0.169 | 2.575E-01 | 8.573E-01 |
| ARHGAP10  | 0.169 | 2.167E-01 | 3.989E-04 |
| MS4A10    | 0.169 | 7.489E-01 | 7.231E-01 |
| POLB      | 0.169 | 2.356E-01 | 2.300E-05 |

|              |       |           |           |
|--------------|-------|-----------|-----------|
| DIRAS3       | 0.169 | 5.616E-01 | 3.428E-02 |
| SPACA9       | 0.169 | 2.105E-01 | 7.284E-01 |
| RASSF1       | 0.169 | 1.314E-01 | 5.152E-03 |
| MET          | 0.169 | 3.603E-01 | 2.902E-03 |
| MEIOC        | 0.169 | 4.473E-01 | 1.279E-04 |
| CTSD         | 0.169 | 2.715E-01 | 2.433E-03 |
| SREBF1       | 0.169 | 3.507E-01 | 5.262E-01 |
| DOCK11       | 0.169 | 4.738E-01 | 1.614E-01 |
| TMEM86A      | 0.169 | 3.211E-01 | 6.588E-04 |
| MYO1E        | 0.169 | 2.384E-01 | 1.705E-01 |
| CHRNA4       | 0.169 | 8.107E-01 | 1.706E-01 |
| VANGL1       | 0.168 | 1.103E-01 | 3.234E-02 |
| NEO1         | 0.168 | 3.573E-01 | 2.331E-01 |
| STRA6        | 0.168 | 5.867E-01 | 3.371E-01 |
| HILPDA       | 0.168 | 4.819E-01 | 1.138E-03 |
| SMIM11A      | 0.168 | 6.708E-01 | 6.502E-01 |
| MNX1         | 0.168 | 6.257E-01 | 4.525E-01 |
| AL121753.1   | 0.168 | 4.329E-01 | 1.934E-02 |
| ZNHIT6       | 0.168 | 8.783E-02 | 3.988E-04 |
| PRAG1        | 0.168 | 2.760E-01 | 2.381E-02 |
| TMEM212      | 0.168 | 8.405E-01 | 5.641E-01 |
| PIAS1        | 0.168 | 5.331E-02 | 3.070E-02 |
| SYTL2        | 0.168 | 4.930E-01 | 1.319E-01 |
| AC098850.4   | 0.168 | 7.907E-01 | 4.462E-02 |
| DEPDC7       | 0.168 | 6.336E-01 | 9.150E-02 |
| PODNL1       | 0.168 | 5.753E-01 | 2.702E-01 |
| KRT12        | 0.168 | 7.390E-01 | 5.411E-01 |
| TEX30        | 0.168 | 2.160E-01 | 1.649E-01 |
| ANKRD28      | 0.168 | 2.319E-02 | 4.838E-01 |
| OR14K1       | 0.168 | NA        | 1.167E-02 |
| C16orf87     | 0.167 | 1.954E-01 | 1.918E-03 |
| 15orf38-AP3S | 0.167 | 3.887E-01 | 1.478E-02 |
| PHF19        | 0.167 | 3.520E-01 | 1.176E-01 |
| TRAM1L1      | 0.167 | 5.686E-01 | 1.990E-01 |
| PACSIN3      | 0.167 | 2.049E-01 | 7.639E-04 |
| DIRC1        | 0.167 | 7.418E-01 | 9.356E-03 |
| MAMLD1       | 0.167 | 5.062E-01 | 1.364E-02 |
| AC092718.3   | 0.167 | 3.215E-01 | 1.808E-01 |
| NFIA         | 0.167 | 3.590E-01 | 1.792E-01 |
| PCDHGA2      | 0.167 | 5.156E-01 | 3.194E-02 |
| TDO2         | 0.167 | 5.676E-01 | 1.555E-02 |
| CD244        | 0.167 | 6.364E-01 | 6.526E-01 |
| RRBP1        | 0.167 | 8.812E-02 | 1.303E-02 |
| CCDC136      | 0.167 | 4.961E-01 | 2.241E-01 |
| NAJC25-GNG   | 0.167 | NA        | 1.245E-02 |
| FKBP7        | 0.166 | 2.545E-01 | 2.680E-02 |
| MAP7D1       | 0.166 | 1.190E-01 | 3.643E-02 |
| AL807752.6   | 0.166 | NA        | 2.160E-01 |
| FAM47E       | 0.166 | 5.064E-01 | 9.283E-03 |
| TJP1         | 0.166 | 9.344E-02 | 2.784E-03 |

|            |       |           |           |
|------------|-------|-----------|-----------|
| ESAM       | 0.166 | 3.228E-01 | 6.447E-03 |
| SLC31A2    | 0.166 | 4.537E-01 | 2.650E-02 |
| ZNF607     | 0.166 | 2.990E-01 | 3.946E-01 |
| IL10       | 0.166 | 5.867E-01 | 1.175E-02 |
| YIF1A      | 0.166 | 1.031E-01 | 1.855E-01 |
| C1orf112   | 0.166 | 3.056E-01 | 6.047E-04 |
| PRDM16     | 0.166 | 6.794E-01 | 7.379E-03 |
| MIR4734    | 0.166 | NA        | 6.052E-02 |
| HCRT       | 0.165 | 7.845E-01 | 6.944E-03 |
| HAL        | 0.165 | 6.285E-01 | 1.318E-01 |
| SPATA16    | 0.165 | 8.973E-01 | 7.681E-02 |
| IL17B      | 0.165 | 4.575E-01 | 3.189E-01 |
| HSPG2      | 0.165 | 3.840E-01 | 1.926E-01 |
| TEX36      | 0.165 | NA        | 5.891E-03 |
| TMOD3      | 0.165 | 1.082E-01 | 5.795E-04 |
| R5-ARHGAP1 | 0.165 | 4.895E-01 | 1.977E-01 |
| LRRC74A    | 0.165 | 6.932E-01 | 3.215E-01 |
| ATP6AP1    | 0.165 | 5.003E-02 | 1.398E-01 |
| MIR6761    | 0.165 | NA        | 1.431E-01 |
| STMND1     | 0.165 | 8.298E-01 | 4.191E-01 |
| MIR3168    | 0.165 | NA        | 2.794E-03 |
| C15orf65   | 0.165 | 2.718E-01 | 6.200E-05 |
| 43898.000  | 0.165 | 6.726E-02 | 3.049E-01 |
| OR4F15     | 0.165 | NA        | 1.847E-01 |
| HOXA7      | 0.165 | 5.099E-01 | 3.660E-02 |
| MIR6509    | 0.165 | 8.171E-01 | 1.593E-01 |
| LRRC3B     | 0.165 | 8.168E-01 | 4.329E-01 |
| C10orf35   | 0.165 | 2.639E-01 | 2.809E-01 |
| CCNE2      | 0.165 | 4.425E-01 | 3.524E-02 |
| RNF130     | 0.164 | 2.614E-01 | 2.070E-05 |
| CGN        | 0.164 | 5.559E-01 | 1.013E-02 |
| SLC5A5     | 0.164 | 7.295E-01 | 1.299E-01 |
| MIR548AR   | 0.164 | 6.599E-01 | 9.553E-04 |
| GPBAR1     | 0.164 | 5.389E-01 | 5.766E-03 |
| SELENOS    | 0.164 | 2.163E-02 | 1.375E-01 |
| SUN2       | 0.164 | 1.398E-01 | 4.933E-03 |
| ELOVL3     | 0.164 | 6.580E-01 | 6.837E-02 |
| FAM216B    | 0.164 | 7.583E-01 | 3.059E-01 |
| ARRB2      | 0.164 | 2.462E-01 | 1.209E-02 |
| TM7SF2     | 0.164 | 5.180E-01 | 5.691E-04 |
| SPAG9      | 0.164 | 5.800E-02 | 3.900E-02 |
| PNPLA2     | 0.164 | 2.543E-01 | 1.258E-03 |
| TFR2       | 0.164 | 5.496E-01 | 7.615E-01 |
| MIR3129    | 0.164 | NA        | 3.629E-01 |
| THRA       | 0.164 | 2.713E-01 | 5.332E-02 |
| KCNK2      | 0.164 | 7.339E-01 | 6.999E-02 |
| ATP2B4     | 0.164 | 3.714E-01 | 5.329E-01 |
| SLC25A25   | 0.164 | 2.790E-01 | 1.208E-02 |
| HPN        | 0.164 | 7.478E-01 | 5.663E-04 |
| C11orf87   | 0.163 | 8.208E-01 | 5.570E-02 |

|            |       |           |           |
|------------|-------|-----------|-----------|
| MELK       | 0.163 | 3.954E-01 | 7.727E-01 |
| SOX3       | 0.163 | NA        | 1.396E-01 |
| MIR4714    | 0.163 | NA        | 7.472E-01 |
| PTGES      | 0.163 | 5.629E-01 | 5.648E-01 |
| ZFYVE19    | 0.163 | 5.457E-02 | 5.675E-04 |
| LY75-CD302 | 0.163 | 6.805E-01 | 2.430E-01 |
| TEK        | 0.163 | 4.495E-01 | 2.428E-01 |
| TBCEL      | 0.163 | 7.924E-02 | 3.114E-01 |
| MYCN       | 0.163 | 7.467E-01 | 1.846E-04 |
| PXYLP1     | 0.163 | 3.552E-01 | 2.065E-03 |
| PRSS35     | 0.163 | 6.834E-01 | 4.177E-03 |
| SDHAF1     | 0.163 | 9.109E-02 | 4.455E-04 |
| GPR107     | 0.163 | 5.559E-02 | 8.039E-01 |
| UNC93A     | 0.163 | 8.507E-01 | 2.457E-01 |
| EHD2       | 0.163 | 4.463E-01 | 6.375E-01 |
| C6orf106   | 0.163 | 1.118E-01 | 1.710E-02 |
| EVA1B      | 0.163 | 4.000E-01 | 3.351E-02 |
| SDHC       | 0.163 | 1.433E-01 | 2.675E-03 |
| LDHD       | 0.163 | 5.922E-01 | 1.781E-03 |
| STX5       | 0.163 | 5.302E-02 | 1.790E-06 |
| MAPK7      | 0.163 | 1.024E-01 | 9.004E-02 |
| POMGNT2    | 0.162 | 1.492E-01 | 5.097E-01 |
| HDAC5      | 0.162 | 1.060E-01 | 6.305E-04 |
| PITRM1     | 0.162 | 6.245E-02 | 6.731E-01 |
| CDNF       | 0.162 | 3.330E-01 | 2.142E-01 |
| ERMP1      | 0.162 | 4.216E-01 | 8.461E-01 |
| HIST1H3C   | 0.162 | 6.004E-01 | 3.014E-01 |
| SHROOM3    | 0.162 | 5.176E-01 | 3.189E-02 |
| PI15       | 0.162 | 6.609E-01 | 7.207E-01 |
| TLE6       | 0.162 | 6.586E-01 | 3.248E-03 |
| CLEC5A     | 0.162 | 6.109E-01 | 2.236E-04 |
| HES6       | 0.162 | 5.102E-01 | 2.653E-01 |
| IFNA14     | 0.162 | NA        | 6.870E-03 |
| MPL        | 0.162 | 3.923E-01 | 2.773E-03 |
| MAFF       | 0.162 | 3.567E-01 | 4.654E-01 |
| FAM156A    | 0.162 | 2.762E-01 | 1.810E-02 |
| FJX1       | 0.162 | 5.000E-01 | 1.173E-04 |
| WTH3DI     | 0.162 | 7.322E-01 | 2.554E-02 |
| REPS2      | 0.162 | 3.385E-01 | 1.481E-01 |
| MIR548J    | 0.162 | NA        | 3.763E-01 |
| SLC35G2    | 0.162 | 5.271E-01 | 4.740E-02 |
| SMOC1      | 0.161 | 7.415E-01 | 2.938E-01 |
| DLG4       | 0.161 | 3.493E-01 | 3.314E-01 |
| TNR        | 0.161 | 7.229E-01 | 3.230E-03 |
| AC083902.2 | 0.161 | 7.837E-01 | 2.109E-04 |
| HHLA3      | 0.161 | 2.628E-01 | 1.362E-01 |
| KDELR1     | 0.161 | 1.705E-02 | 7.340E-02 |
| TMEM55A    | 0.161 | 2.786E-01 | 2.494E-01 |
| MRC2       | 0.161 | 5.140E-01 | 1.627E-03 |
| HGSNAT     | 0.161 | 1.479E-01 | 6.085E-02 |

|           |       |           |           |
|-----------|-------|-----------|-----------|
| NAGS      | 0.161 | 4.125E-01 | 3.251E-01 |
| PINK1     | 0.161 | 9.861E-02 | 2.521E-01 |
| YWHAQ     | 0.161 | 1.398E-01 | 3.934E-02 |
| C3orf18   | 0.161 | 3.339E-01 | 9.410E-06 |
| ACAP2     | 0.161 | 6.799E-02 | 8.949E-01 |
| PRKCI     | 0.161 | 1.320E-01 | 3.778E-02 |
| FAM180B   | 0.161 | 7.321E-01 | 6.149E-02 |
| HENMT1    | 0.161 | 2.370E-01 | 3.503E-01 |
| APH1A     | 0.161 | 3.346E-02 | 2.132E-02 |
| TM2D2     | 0.161 | 2.021E-01 | 4.346E-01 |
| PSMC3IP   | 0.161 | 1.738E-01 | 1.643E-03 |
| SPSB1     | 0.161 | 2.206E-01 | 4.130E-05 |
| NDP       | 0.161 | 7.159E-01 | 3.726E-01 |
| MORN2     | 0.161 | 1.428E-01 | 1.618E-01 |
| NOS1      | 0.161 | 7.460E-01 | 2.874E-01 |
| PLA2G2F   | 0.161 | 7.624E-01 | 3.719E-01 |
| NCOA1     | 0.160 | 9.720E-02 | 9.314E-02 |
| IGFBP3    | 0.160 | 6.134E-01 | 4.987E-01 |
| RNLS      | 0.160 | 4.056E-01 | 2.017E-02 |
| ZNF415    | 0.160 | 3.956E-01 | 3.039E-01 |
| FUT11     | 0.160 | 1.178E-01 | 1.872E-02 |
| LZTS1     | 0.160 | 4.801E-01 | 6.000E-01 |
| LCE2B     | 0.160 | 9.468E-01 | 7.103E-03 |
| CBLC      | 0.160 | 4.968E-01 | 2.736E-01 |
| PTGIR     | 0.160 | 4.968E-01 | 7.322E-03 |
| TMSB4Y    | 0.160 | 7.787E-01 | 8.845E-01 |
| SPG20     | 0.160 | 1.830E-01 | 4.230E-05 |
| CLDN25    | 0.160 | NA        | 1.370E-01 |
| WNT9A     | 0.160 | 5.601E-01 | 2.237E-03 |
| TRIM34    | 0.159 | 3.403E-01 | 2.634E-01 |
| OR6V1     | 0.159 | NA        | 7.555E-03 |
| ASAP1     | 0.159 | 2.534E-01 | 2.673E-01 |
| ALDH5A1   | 0.159 | 4.569E-01 | 8.991E-02 |
| SKIDA1    | 0.159 | 5.651E-01 | 6.322E-02 |
| RBP1      | 0.159 | 6.582E-01 | 5.758E-02 |
| GGACT     | 0.159 | 2.563E-01 | 1.836E-01 |
| 43892.000 | 0.159 | 2.946E-01 | 1.242E-01 |
| ALCAM     | 0.159 | 5.419E-01 | 8.467E-02 |
| VPS37C    | 0.159 | 9.462E-03 | 2.522E-01 |
| CACNA1G   | 0.159 | 5.887E-01 | 5.265E-01 |
| YS1-DBNDD | 0.159 | 4.164E-01 | 9.168E-02 |
| AGFG2     | 0.159 | 2.082E-01 | 1.595E-01 |
| DCDC1     | 0.159 | 6.735E-01 | 1.882E-01 |
| LCA5      | 0.159 | 2.473E-01 | 2.097E-03 |
| ILK       | 0.159 | 2.437E-01 | 2.565E-01 |
| CMTM6     | 0.159 | 1.368E-01 | 3.147E-01 |
| CCNB3     | 0.158 | 5.713E-01 | 1.410E-01 |
| REM1      | 0.158 | 5.568E-01 | 8.664E-01 |
| NBPF26    | 0.158 | 4.251E-01 | 8.484E-01 |
| ACOT7     | 0.158 | 2.758E-01 | 5.288E-01 |



|           |       |           |           |
|-----------|-------|-----------|-----------|
| ANXA1     | 0.158 | 5.894E-01 | 8.372E-01 |
| SNX12     | 0.158 | 1.668E-02 | 8.076E-01 |
| CRYBB1    | 0.158 | 5.749E-01 | 1.044E-03 |
| ZNF398    | 0.158 | 6.781E-02 | 2.359E-02 |
| ZNF765    | 0.158 | 1.252E-01 | 4.958E-01 |
| KLF12     | 0.158 | 5.202E-01 | 3.129E-01 |
| HIVEP1    | 0.158 | 2.247E-01 | 2.006E-02 |
| SPAG1     | 0.158 | 3.751E-01 | 7.629E-02 |
| PTPRF     | 0.158 | 2.043E-01 | 2.716E-01 |
| ZNF676    | 0.158 | 8.213E-01 | 4.435E-02 |
| MSH2      | 0.158 | 1.713E-01 | 1.145E-03 |
| CD248     | 0.158 | 5.211E-01 | 2.281E-01 |
| MAGT1     | 0.158 | 2.349E-02 | 2.332E-01 |
| SND1      | 0.158 | 3.758E-02 | 1.468E-01 |
| RNF150    | 0.158 | 6.094E-01 | 6.391E-02 |
| CCK       | 0.158 | 7.738E-01 | 1.516E-01 |
| ALMS1     | 0.158 | 1.079E-01 | 1.172E-02 |
| GPRC5D    | 0.157 | 4.622E-01 | 4.661E-04 |
| PM20D1    | 0.157 | 8.249E-01 | 5.795E-03 |
| STX2      | 0.157 | 4.595E-01 | 1.245E-02 |
| SEC61A2   | 0.157 | 1.586E-01 | 8.036E-02 |
| DDHD2     | 0.157 | 2.566E-01 | 5.604E-01 |
| MYLIP     | 0.157 | 4.060E-01 | 5.584E-01 |
| CDC42EP3  | 0.157 | 3.708E-01 | 6.259E-01 |
| MIR4742   | 0.157 | 8.007E-01 | 2.870E-01 |
| RAB11FIP2 | 0.157 | 2.253E-01 | 1.587E-04 |
| FOXI2     | 0.157 | 7.875E-01 | 1.675E-02 |
| GRASP     | 0.157 | 4.362E-01 | 8.283E-01 |
| TBX20     | 0.157 | 7.723E-01 | 6.956E-01 |
| FAM120AOS | 0.157 | 6.061E-02 | 7.823E-01 |
| CCDC47    | 0.157 | 5.741E-02 | 1.122E-01 |
| TVP23B    | 0.157 | 1.132E-01 | 1.035E-03 |
| ELL3      | 0.157 | 4.291E-01 | 5.748E-03 |
| NFATC2    | 0.157 | 4.526E-01 | 1.626E-02 |
| PPP1R21   | 0.157 | 2.363E-02 | 4.122E-04 |
| MIR1283-2 | 0.157 | NA        | 3.428E-01 |
| PP2D1     | 0.157 | 3.372E-01 | 3.305E-01 |
| APOBEC1   | 0.157 | 9.066E-01 | 7.613E-01 |
| MBOAT2    | 0.157 | 4.900E-01 | 1.931E-01 |
| CREB3L1   | 0.157 | 6.070E-01 | 2.272E-01 |
| PLPPR4    | 0.157 | 5.902E-01 | 4.651E-01 |
| TMEM169   | 0.157 | 6.030E-01 | 4.160E-03 |
| MIR635    | 0.157 | 2.389E-01 | 5.894E-02 |
| GPR179    | 0.157 | 6.288E-01 | 2.777E-03 |
| MTRNR2L3  | 0.157 | 6.620E-01 | 5.216E-04 |
| SLC35D3   | 0.156 | 7.538E-01 | 2.859E-01 |
| FYCO1     | 0.156 | 2.035E-01 | 1.031E-01 |
| NUMBL     | 0.156 | 2.839E-01 | 7.831E-03 |
| MIR4259   | 0.156 | NA        | 1.273E-01 |
| ABHD12    | 0.156 | 2.956E-01 | 9.173E-01 |

|           |       |           |           |
|-----------|-------|-----------|-----------|
| CSF1R     | 0.156 | 6.298E-01 | 8.685E-01 |
| MCAM      | 0.156 | 3.888E-01 | 4.646E-01 |
| PACS1     | 0.156 | 7.692E-02 | 5.431E-03 |
| KIAA1210  | 0.156 | 6.896E-01 | 5.557E-01 |
| LGALS12   | 0.156 | 7.472E-01 | 2.496E-01 |
| MIR5192   | 0.156 | NA        | 5.080E-03 |
| TAS2R42   | 0.156 | 7.699E-01 | 1.334E-01 |
| EPCAM     | 0.156 | 5.032E-01 | 1.676E-01 |
| MIR3684   | 0.156 | NA        | 4.592E-01 |
| RGPD6     | 0.156 | 7.237E-01 | 1.344E-01 |
| SYNPO2L   | 0.156 | 6.099E-01 | 7.280E-02 |
| EFCAB14   | 0.156 | 6.230E-02 | 1.677E-04 |
| ECSCR     | 0.155 | 4.820E-01 | 5.504E-01 |
| ACRV1     | 0.155 | 4.593E-01 | 1.600E-01 |
| KIAA1841  | 0.155 | 1.719E-01 | 4.352E-01 |
| SSPN      | 0.155 | 4.064E-01 | 1.638E-01 |
| APOL5     | 0.155 | 7.159E-01 | 3.811E-03 |
| CCL14     | 0.155 | 7.280E-01 | 1.094E-01 |
| VAMP5     | 0.155 | 5.170E-01 | 3.079E-01 |
| ITGA8     | 0.155 | 5.826E-01 | 7.349E-02 |
| RNF170    | 0.155 | 1.366E-01 | 2.415E-01 |
| HIGD2B    | 0.155 | 6.910E-01 | 7.210E-01 |
| DGKG      | 0.155 | 6.268E-01 | 1.302E-01 |
| IAH1      | 0.155 | 6.268E-02 | 1.749E-03 |
| ANKRD27   | 0.155 | 1.145E-01 | 1.419E-02 |
| FAM222B   | 0.155 | 1.237E-01 | 2.048E-01 |
| PIMREG    | 0.155 | 4.525E-01 | 4.478E-04 |
| ETV3      | 0.155 | 1.838E-01 | 2.629E-01 |
| OR5P2     | 0.155 | 7.832E-01 | 6.109E-01 |
| 44082.000 | 0.155 | 2.036E-01 | 4.896E-04 |
| ELK3      | 0.155 | 2.492E-01 | 1.651E-03 |
| FAM26E    | 0.155 | 5.446E-01 | 2.312E-01 |
| MYH1      | 0.155 | 7.635E-01 | 4.832E-01 |
| LYZL2     | 0.154 | 9.038E-01 | 4.361E-01 |
| TCF19     | 0.154 | 4.072E-01 | 6.489E-02 |
| DNAJC3    | 0.154 | 5.607E-02 | 1.605E-02 |
| MMP27     | 0.154 | 8.681E-01 | 3.108E-01 |
| RASSF2    | 0.154 | 5.303E-01 | 9.331E-01 |
| NDNF      | 0.154 | 6.860E-01 | 5.659E-02 |
| YIPF2     | 0.154 | 8.185E-02 | 1.876E-01 |
| INAFM1    | 0.154 | 2.497E-01 | 7.106E-01 |
| RAD18     | 0.154 | 1.881E-01 | 1.454E-02 |
| PRICKLE2  | 0.154 | 4.641E-01 | 3.263E-03 |
| PPIC      | 0.154 | 2.516E-01 | 5.772E-02 |
| ROM1      | 0.154 | 2.902E-01 | 9.084E-02 |
| TRIM16L   | 0.154 | 5.746E-01 | 3.770E-01 |
| TIE1      | 0.154 | 4.190E-01 | 3.274E-01 |
| SPTLC1    | 0.154 | 1.710E-01 | 3.980E-05 |
| ARHGEF17  | 0.154 | 2.648E-01 | 3.027E-01 |
| SAPCD2    | 0.154 | 4.657E-01 | 2.621E-01 |

|            |       |           |           |
|------------|-------|-----------|-----------|
| SKA2       | 0.154 | 1.365E-01 | 4.045E-01 |
| ZBTB8B     | 0.153 | 6.985E-01 | 1.150E-01 |
| C16orf71   | 0.153 | 3.358E-01 | 3.022E-01 |
| LZIC       | 0.153 | 4.068E-02 | 4.514E-02 |
| WDR54      | 0.153 | 3.307E-01 | 7.304E-01 |
| SCAMP2     | 0.153 | 1.709E-02 | 8.146E-02 |
| NTNG2      | 0.153 | 5.593E-01 | 1.913E-01 |
| C11orf63   | 0.153 | 3.934E-01 | 4.070E-03 |
| AC008758.5 | 0.153 | NA        | 7.467E-02 |
| SCTR       | 0.153 | 7.364E-01 | 3.546E-03 |
| CHCHD3     | 0.153 | 5.384E-02 | 5.679E-02 |
| LDB3       | 0.153 | 5.861E-01 | 9.062E-01 |
| FSBP       | 0.153 | NA        | 8.412E-01 |
| PIGV       | 0.153 | 6.474E-02 | 1.879E-04 |
| ARHGAP31   | 0.153 | 4.211E-01 | 1.627E-01 |
| HS2ST1     | 0.153 | 9.566E-02 | 2.707E-01 |
| MIF4GD     | 0.153 | 9.781E-02 | 2.769E-03 |
| ARL2-SNX15 | 0.153 | 8.329E-01 | 2.276E-01 |
| C4orf51    | 0.153 | 7.086E-01 | 4.269E-03 |
| MAP1LC3A   | 0.153 | 5.131E-01 | 5.323E-03 |
| MIR4690    | 0.153 | NA        | 9.691E-02 |
| RFFL       | 0.153 | 2.038E-01 | 6.490E-01 |
| RPUSD3     | 0.153 | 1.461E-01 | 2.273E-02 |
| TESK2      | 0.152 | 3.848E-01 | 2.460E-02 |
| VCAM1      | 0.152 | 6.266E-01 | 5.039E-02 |
| ATAD2      | 0.152 | 3.178E-01 | 3.981E-01 |
| TMEM238    | 0.152 | 4.961E-01 | 2.663E-01 |
| ZNF829     | 0.152 | 4.072E-01 | 1.556E-01 |
| UNC13D     | 0.152 | 5.412E-01 | 1.605E-03 |
| RNASE6     | 0.152 | 6.219E-01 | 2.616E-02 |
| SLC35B3    | 0.152 | 5.895E-02 | 4.674E-04 |
| RBM47      | 0.152 | 3.118E-01 | 1.148E-01 |
| PRAC2      | 0.152 | 7.944E-01 | 1.255E-03 |
| ITM2A      | 0.152 | 5.993E-01 | 2.230E-03 |
| ZNF462     | 0.152 | 4.321E-01 | 1.383E-02 |
| OR52I1     | 0.152 | NA        | 7.726E-02 |
| ZNF805     | 0.152 | 1.538E-01 | 4.107E-01 |
| TMEM209    | 0.152 | 8.350E-02 | 5.470E-01 |
| MIR32      | 0.152 | NA        | 3.067E-01 |
| AC002310.5 | 0.152 | 7.085E-01 | 2.299E-01 |
| TPSAB1     | 0.152 | 6.743E-01 | 1.779E-02 |
| ZYG11B     | 0.152 | 4.575E-02 | 8.627E-04 |
| TMEM206    | 0.152 | 1.629E-01 | 8.641E-03 |
| ZNF217     | 0.152 | 2.396E-01 | 2.846E-01 |
| TFE3       | 0.152 | 3.888E-02 | 1.547E-01 |
| CACNA1A    | 0.151 | 6.190E-01 | 3.102E-03 |
| MARK2      | 0.151 | 3.200E-02 | 5.217E-01 |
| ST8SIA2    | 0.151 | 7.696E-01 | 1.935E-01 |
| SLC2A10    | 0.151 | 4.920E-01 | 1.419E-02 |
| SNTB1      | 0.151 | 5.829E-01 | 2.770E-02 |

|            |       |           |           |
|------------|-------|-----------|-----------|
| TMEM135    | 0.151 | 2.338E-01 | 1.654E-01 |
| GLRX2      | 0.151 | 1.434E-01 | 1.866E-04 |
| EPS15      | 0.151 | 1.541E-02 | 1.474E-02 |
| TECRL      | 0.151 | NA        | 2.748E-02 |
| SIGLEC14   | 0.151 | 7.441E-01 | 9.972E-02 |
| USP25      | 0.151 | 1.162E-01 | 2.712E-01 |
| HYI        | 0.151 | 2.185E-01 | 7.374E-02 |
| AC026464.1 | 0.151 | NA        | 4.865E-01 |
| ITGA2      | 0.151 | 5.780E-01 | 3.464E-01 |
| SAMD14     | 0.151 | 5.125E-01 | 2.472E-03 |
| DCTN3      | 0.150 | 1.380E-01 | 3.428E-01 |
| NTN4       | 0.150 | 5.194E-01 | 1.957E-02 |
| LRRC55     | 0.150 | 6.157E-01 | 1.726E-01 |
| TPST1      | 0.150 | 4.187E-01 | 4.538E-01 |
| TPP1       | 0.150 | 1.981E-01 | 5.793E-02 |
| DNM3       | 0.150 | 4.931E-01 | 2.304E-01 |
| MANEAL     | 0.150 | 5.303E-01 | 3.263E-01 |
| MBNL3      | 0.150 | 3.970E-01 | 1.774E-01 |
| GPR68      | 0.150 | 6.425E-01 | 2.362E-03 |
| FBXO17     | 0.150 | 6.488E-01 | 1.144E-01 |
| TMEM100    | 0.150 | 7.193E-01 | 6.015E-01 |
| ASB2       | 0.150 | 6.513E-01 | 4.331E-02 |
| OR6P1      | 0.149 | NA        | 1.924E-01 |
| SNTN       | 0.149 | 7.972E-01 | 5.500E-02 |
| YIPF7      | 0.149 | 7.309E-01 | 2.460E-02 |
| C12orf56   | 0.149 | 7.203E-01 | 2.579E-01 |
| ST14       | 0.149 | 3.429E-01 | 3.661E-01 |
| ARHGEF9    | 0.149 | 1.829E-01 | 4.510E-02 |
| CCT6B      | 0.149 | 3.475E-01 | 3.856E-02 |
| TINAGL1    | 0.149 | 5.662E-01 | 6.928E-01 |
| NGLY1      | 0.149 | 1.438E-01 | 3.398E-01 |
| LRP1B      | 0.149 | 7.921E-01 | 3.887E-01 |
| MIR8078    | 0.149 | 8.248E-01 | 7.559E-03 |
| TMOD2      | 0.149 | 3.714E-01 | 1.027E-01 |
| HNRNPF     | 0.149 | 8.164E-02 | 1.091E-01 |
| ARCN1      | 0.149 | 2.298E-02 | 6.195E-01 |
| HMMR       | 0.149 | 3.920E-01 | 1.314E-03 |
| GNA12      | 0.149 | 3.005E-01 | 5.365E-01 |
| CALCOCO2   | 0.149 | 3.402E-02 | 3.067E-01 |
| NLGN2      | 0.149 | 3.516E-01 | 5.789E-02 |
| TOMM34     | 0.149 | 2.478E-01 | 3.968E-01 |
| CENPL      | 0.149 | 2.191E-01 | 1.130E-01 |
| GOSR2      | 0.149 | 2.357E-02 | 2.822E-01 |
| SLC24A5    | 0.149 | NA        | 8.786E-03 |
| RSPH10B2   | 0.149 | 6.572E-01 | 2.720E-01 |
| EDA2R      | 0.148 | 6.207E-01 | 5.744E-03 |
| PCDHGA7    | 0.148 | 6.106E-01 | 1.300E-01 |
| ZNF367     | 0.148 | 4.163E-01 | 1.143E-01 |
| TMEM104    | 0.148 | 1.137E-01 | 5.173E-02 |
| PIGC       | 0.148 | 1.013E-01 | 2.392E-01 |

|            |       |           |           |
|------------|-------|-----------|-----------|
| TOR1B      | 0.148 | 7.581E-02 | 1.736E-03 |
| CYP21A2    | 0.148 | 7.280E-01 | 3.087E-03 |
| FRRS1L     | 0.148 | 7.668E-01 | 7.301E-01 |
| CSGALNACT  | 0.148 | 1.966E-01 | 8.855E-02 |
| TGOLN2     | 0.148 | 1.013E-01 | 8.681E-01 |
| LMO7       | 0.148 | 5.047E-01 | 4.461E-01 |
| ERICH6     | 0.148 | 4.223E-01 | 2.120E-01 |
| ARHGEF33   | 0.148 | 5.844E-01 | 2.248E-01 |
| EIF5A2     | 0.148 | 5.915E-01 | 2.684E-02 |
| SAMD4B     | 0.148 | 4.419E-02 | 5.124E-03 |
| YKT6       | 0.147 | 1.013E-01 | 1.608E-02 |
| RNASE4     | 0.147 | 4.996E-01 | 1.224E-01 |
| MS4A14     | 0.147 | 6.292E-01 | 8.552E-02 |
| CHST15     | 0.147 | 6.189E-01 | 5.993E-01 |
| AP2A1      | 0.147 | 2.335E-02 | 1.968E-01 |
| TMEM240    | 0.147 | 4.433E-01 | 9.884E-04 |
| NPEPPS     | 0.147 | 5.256E-02 | 2.200E-01 |
| FFAR3      | 0.147 | 7.714E-01 | 3.988E-02 |
| TBX19      | 0.147 | 2.821E-01 | 1.606E-03 |
| UAP1       | 0.147 | 3.324E-01 | 8.849E-01 |
| IGF1       | 0.147 | 7.513E-01 | 3.514E-01 |
| LRRN1      | 0.147 | 7.322E-01 | 7.921E-01 |
| MYO9A      | 0.147 | 9.314E-02 | 3.849E-01 |
| CHMP4B     | 0.146 | 6.878E-02 | 8.332E-01 |
| PKD2       | 0.146 | 2.449E-01 | 6.566E-03 |
| RDX        | 0.146 | 4.589E-01 | 6.333E-03 |
| CXCL16     | 0.146 | 3.975E-01 | 9.249E-03 |
| TPSG1      | 0.146 | 6.764E-01 | 1.109E-01 |
| OTUD7A     | 0.146 | 5.675E-01 | 3.099E-01 |
| ZNF525     | 0.146 | 2.013E-01 | 5.749E-01 |
| PIGS       | 0.146 | 1.625E-01 | 4.557E-02 |
| C2orf91    | 0.146 | 7.869E-01 | 1.746E-01 |
| NOMO2      | 0.146 | 3.401E-01 | 1.191E-01 |
| WISP1      | 0.146 | 6.961E-01 | 4.781E-04 |
| KIF23      | 0.146 | 3.393E-01 | 4.703E-01 |
| TCTA       | 0.146 | 1.595E-01 | 1.232E-01 |
| UBQLNL     | 0.146 | 5.714E-01 | 7.678E-02 |
| SLC44A1    | 0.146 | 1.978E-01 | 4.255E-02 |
| CYP4F22    | 0.146 | 7.728E-01 | 2.701E-01 |
| DDOST      | 0.146 | 4.779E-02 | 1.758E-01 |
| C1orf43    | 0.146 | 2.181E-02 | 7.744E-01 |
| ANKEF1     | 0.146 | 2.839E-01 | 3.160E-01 |
| JAZF1      | 0.146 | 4.627E-01 | 3.342E-03 |
| AP2S1      | 0.146 | 2.009E-01 | 9.665E-03 |
| HIST4H4    | 0.146 | 4.471E-01 | 1.424E-03 |
| ZNF28      | 0.146 | 2.154E-01 | 2.992E-01 |
| UBE2F-SCLY | 0.145 | 5.778E-01 | 4.329E-01 |
| SLC17A6    | 0.145 | NA        | 4.432E-03 |
| CANT1      | 0.145 | 1.264E-01 | 4.933E-01 |
| DNASE1L1   | 0.145 | 1.443E-01 | 5.277E-01 |

|          |       |           |           |
|----------|-------|-----------|-----------|
| GPR19    | 0.145 | 5.753E-01 | 2.851E-04 |
| C16orf89 | 0.145 | 7.470E-01 | 1.286E-01 |
| LRRC6    | 0.145 | 5.311E-01 | 2.388E-03 |
| SPDYE3   | 0.145 | 9.119E-02 | 2.599E-01 |
| SEMA4C   | 0.145 | 2.747E-01 | 4.085E-04 |
| GCM1     | 0.145 | 7.254E-01 | 1.412E-04 |
| KCNJ12   | 0.145 | 7.360E-01 | 1.608E-01 |
| MIR548L  | 0.145 | 8.007E-01 | 3.861E-04 |
| SLC35E1  | 0.145 | 3.375E-02 | 6.605E-02 |
| MAPRE1   | 0.145 | 4.852E-02 | 3.983E-01 |
| INPP5A   | 0.145 | 1.984E-01 | 1.541E-02 |
| WTIP     | 0.145 | 4.053E-01 | 1.812E-02 |
| RAD23B   | 0.145 | 1.078E-01 | 8.257E-01 |
| BTG3     | 0.145 | 2.269E-01 | 5.249E-01 |
| MINDY1   | 0.145 | 3.312E-01 | 3.214E-04 |
| GCHFR    | 0.145 | 4.425E-01 | 9.484E-01 |
| PPP1R2   | 0.145 | 3.647E-02 | 8.942E-01 |
| TCF7L1   | 0.145 | 5.943E-01 | 4.702E-03 |
| ABCG4    | 0.145 | 6.033E-01 | 1.444E-02 |
| NPTN     | 0.145 | 1.249E-01 | 8.226E-01 |
| KIF25    | 0.145 | 7.180E-01 | 2.564E-01 |
| DNAJB6   | 0.144 | 8.038E-02 | 2.629E-02 |
| EID2     | 0.144 | 1.195E-01 | 2.762E-01 |
| PDIA4    | 0.144 | 1.622E-01 | 8.121E-02 |
| AIF1L    | 0.144 | 6.430E-01 | 7.584E-01 |
| MDGA1    | 0.144 | 6.805E-01 | 1.880E-02 |
| GPR146   | 0.144 | 4.043E-01 | 9.291E-03 |
| PAF1     | 0.144 | 7.092E-02 | 8.030E-01 |
| PARVB    | 0.144 | 5.559E-01 | 5.764E-01 |
| DYRK2    | 0.144 | 3.104E-01 | 6.467E-01 |
| TBCB     | 0.144 | 1.091E-01 | 5.705E-02 |
| THEMIS2  | 0.144 | 5.726E-01 | 1.055E-02 |
| COPB2    | 0.144 | 4.047E-02 | 3.955E-01 |
| DNAJC15  | 0.144 | 6.066E-01 | 3.722E-03 |
| CMPK1    | 0.144 | 3.211E-02 | 8.600E-01 |
| PNMA1    | 0.144 | 4.363E-01 | 2.329E-01 |
| TMEM107  | 0.144 | 2.163E-01 | 8.776E-04 |
| REEP3    | 0.144 | 1.783E-01 | 6.427E-03 |
| CCPG1    | 0.144 | 2.474E-01 | 5.760E-03 |
| ISYNA1   | 0.144 | 5.795E-01 | 2.661E-02 |
| PRSS58   | 0.143 | NA        | 4.797E-01 |
| PGRMC2   | 0.143 | 1.488E-01 | 2.411E-01 |
| SYN3     | 0.143 | 6.985E-01 | 2.528E-03 |
| ZBTB21   | 0.143 | 1.615E-01 | 3.255E-01 |
| UBR5     | 0.143 | 2.158E-01 | 1.055E-01 |
| FSCN3    | 0.143 | 5.803E-01 | 8.336E-03 |
| WNK3     | 0.143 | 6.884E-01 | 3.975E-02 |
| LSMEM1   | 0.143 | 4.045E-01 | 1.306E-01 |
| PITHD1   | 0.143 | 3.971E-02 | 2.184E-01 |
| CRTAP    | 0.143 | 1.364E-01 | 7.726E-04 |

|           |       |           |           |
|-----------|-------|-----------|-----------|
| KIF1C     | 0.143 | 1.665E-01 | 4.216E-02 |
| SLC6A19   | 0.143 | 8.998E-01 | 4.086E-03 |
| RIMKLB    | 0.143 | 4.906E-01 | 6.750E-05 |
| RYR2      | 0.143 | 7.056E-01 | 8.586E-03 |
| ITGB1BP1  | 0.143 | 8.003E-02 | 1.875E-02 |
| SUSD4     | 0.143 | 6.961E-01 | 3.270E-01 |
| MLLT11    | 0.143 | 5.477E-01 | 1.374E-01 |
| MYO5C     | 0.143 | 5.236E-01 | 5.091E-02 |
| PIP4K2A   | 0.143 | 2.730E-01 | 2.617E-02 |
| IKZF2     | 0.143 | 5.310E-01 | 4.071E-01 |
| GPR157    | 0.143 | 4.968E-01 | 3.481E-02 |
| THUMPD3   | 0.143 | 1.025E-01 | 3.280E-01 |
| FOXJ1     | 0.143 | 8.031E-01 | 4.089E-01 |
| S100A8    | 0.143 | 8.117E-01 | 3.709E-01 |
| GAB1      | 0.143 | 2.751E-01 | 2.600E-01 |
| PDHX      | 0.143 | 1.506E-01 | 2.161E-01 |
| FKBP9     | 0.143 | 2.665E-01 | 2.034E-01 |
| LDLRAD2   | 0.143 | 4.407E-01 | 9.495E-01 |
| SLMAP     | 0.143 | 2.608E-01 | 9.495E-01 |
| DESI2     | 0.143 | 6.638E-02 | 9.186E-01 |
| F10       | 0.143 | 6.305E-01 | 9.183E-01 |
| CNTN1     | 0.143 | 7.786E-01 | 9.121E-01 |
| SNRNP27   | 0.143 | 2.025E-02 | 4.253E-03 |
| NBAS      | 0.143 | 5.457E-02 | 5.907E-01 |
| SLC5A2    | 0.143 | 6.127E-01 | 9.502E-03 |
| CLVS1     | 0.142 | 6.620E-01 | 2.437E-01 |
| MIR3680-2 | 0.142 | NA        | 5.315E-04 |
| TXNDC2    | 0.142 | 6.641E-01 | 2.798E-01 |
| ZCWPW2    | 0.142 | 3.202E-01 | 4.396E-01 |
| YIPF6     | 0.142 | 2.556E-02 | 4.458E-01 |
| ABHD5     | 0.142 | 2.357E-01 | 5.586E-02 |
| TRIM44    | 0.142 | 1.284E-01 | 7.544E-02 |
| C1orf167  | 0.142 | 7.443E-01 | 4.743E-02 |
| GMCL1     | 0.142 | 8.905E-02 | 4.060E-04 |
| LIN7B     | 0.142 | 3.504E-01 | 2.937E-03 |
| ANGPTL2   | 0.142 | 5.986E-01 | 7.895E-03 |
| CBFA2T3   | 0.142 | 6.284E-01 | 2.106E-01 |
| SYNGR2    | 0.142 | 1.796E-01 | 2.684E-01 |
| PHF20     | 0.142 | 4.243E-02 | 9.396E-02 |
| SLC27A4   | 0.142 | 3.201E-01 | 4.817E-01 |
| ESRP1     | 0.142 | 4.196E-01 | 8.515E-01 |
| GJA4      | 0.142 | 5.271E-01 | 4.505E-01 |
| RAB12     | 0.142 | 1.370E-01 | 7.373E-01 |
| STK32B    | 0.142 | 6.027E-01 | 1.258E-02 |
| PQLC2L    | 0.142 | 7.327E-01 | 3.533E-02 |
| BMPER     | 0.142 | 6.802E-01 | 5.748E-01 |
| IL6ST     | 0.142 | 3.708E-01 | 2.818E-01 |
| NBDY      | 0.141 | 2.753E-01 | 1.082E-01 |
| STAG1     | 0.141 | 2.473E-01 | 1.720E-01 |
| SLC46A1   | 0.141 | 3.856E-01 | 3.261E-03 |

|            |       |           |           |
|------------|-------|-----------|-----------|
| KRT39      | 0.141 | 8.113E-01 | 2.137E-02 |
| CD200      | 0.141 | 6.002E-01 | 5.427E-02 |
| SRR        | 0.141 | 2.109E-01 | 3.138E-01 |
| PTMS       | 0.141 | 4.064E-01 | 3.789E-01 |
| ERLEC1     | 0.141 | 4.058E-02 | 2.317E-01 |
| CLPB       | 0.141 | 3.410E-01 | 3.859E-02 |
| CETN2      | 0.141 | 8.457E-02 | 8.280E-03 |
| OS9        | 0.141 | 8.521E-02 | 1.375E-01 |
| CA13       | 0.141 | 4.836E-01 | 6.501E-02 |
| MYCBPAP    | 0.141 | 5.568E-01 | 4.488E-01 |
| CREB3      | 0.141 | 1.514E-01 | 1.391E-01 |
| LNPB       | 0.141 | 1.574E-01 | 4.289E-01 |
| AK1        | 0.141 | 4.207E-01 | 2.145E-02 |
| MIR6745    | 0.141 | 7.380E-01 | 2.603E-02 |
| FHL2       | 0.141 | 4.705E-01 | 4.543E-03 |
| SMTN       | 0.141 | 4.714E-01 | 8.469E-01 |
| CAND2      | 0.141 | 6.602E-01 | 1.923E-01 |
| RER1       | 0.141 | 2.930E-02 | 3.888E-01 |
| PCDHB11    | 0.140 | 6.724E-01 | 8.758E-03 |
| MAP2K6     | 0.140 | 4.646E-01 | 1.113E-01 |
| TP53TG5    | 0.140 | 3.733E-01 | 3.777E-02 |
| RMND5B     | 0.140 | 1.017E-01 | 6.238E-02 |
| TMEM39A    | 0.140 | 6.947E-02 | 1.884E-01 |
| OSMR       | 0.140 | 6.336E-01 | 2.166E-01 |
| NLRP3      | 0.140 | 6.440E-01 | 2.175E-02 |
| RARB       | 0.140 | 6.367E-01 | 1.589E-01 |
| TSPAN6     | 0.140 | 4.529E-01 | 5.343E-03 |
| NINJ2      | 0.140 | 5.732E-01 | 1.015E-03 |
| AL049844.1 | 0.140 | 7.488E-01 | 8.372E-01 |
| G6PD       | 0.140 | 5.696E-01 | 9.503E-01 |
| VAMP8      | 0.140 | 2.460E-01 | 9.503E-01 |
| ARL8B      | 0.140 | 9.654E-02 | 9.503E-01 |
| PLPP5      | 0.140 | 3.818E-01 | 9.427E-01 |
| WDR44      | 0.140 | 1.992E-01 | 3.809E-01 |
| TMEM38A    | 0.140 | 5.411E-01 | 1.077E-03 |
| SGO1       | 0.140 | 4.179E-01 | 5.305E-02 |
| OVCH2      | 0.140 | 7.254E-01 | 8.352E-02 |
| C6orf226   | 0.140 | 3.509E-01 | 4.626E-02 |
| TMEM9      | 0.140 | 1.786E-01 | 4.566E-01 |
| P2RY14     | 0.140 | 6.151E-01 | 1.181E-01 |
| RAD51C     | 0.140 | 1.448E-01 | 3.477E-03 |
| DEUP1      | 0.140 | 8.021E-01 | 2.591E-03 |
| NRSN2      | 0.140 | 4.729E-01 | 1.798E-01 |
| PATL1      | 0.140 | 1.351E-01 | 1.161E-02 |
| EHBP1      | 0.140 | 2.843E-01 | 1.527E-03 |
| MIR3613    | 0.140 | 8.235E-01 | 1.777E-03 |
| LACTB2     | 0.140 | 2.781E-01 | 2.101E-01 |
| PSAPL1     | 0.139 | 8.562E-01 | 6.932E-02 |
| LRRC34     | 0.139 | 5.060E-01 | 7.166E-03 |
| FOCAD      | 0.139 | 3.753E-01 | 7.431E-01 |



|             |       |           |           |
|-------------|-------|-----------|-----------|
| STPG1       | 0.139 | 3.833E-01 | 3.085E-01 |
| MIR373      | 0.139 | NA        | 4.057E-03 |
| MIR4497     | 0.139 | NA        | 2.109E-01 |
| MVD         | 0.139 | 2.823E-01 | 5.935E-04 |
| FAM72A      | 0.139 | 4.242E-01 | 1.441E-02 |
| CCDC120     | 0.139 | 2.495E-01 | 3.327E-02 |
| PCSK1       | 0.139 | 7.084E-01 | 4.401E-01 |
| MANF        | 0.139 | 1.917E-01 | 1.058E-02 |
| VKORC1      | 0.139 | 2.334E-01 | 1.785E-04 |
| PPM1E       | 0.139 | 6.166E-01 | 8.803E-01 |
| CLCN5       | 0.139 | 3.407E-01 | 8.697E-01 |
| CENPI       | 0.139 | 3.906E-01 | 5.464E-01 |
| UNCX        | 0.139 | NA        | 2.954E-01 |
| DLGAP3      | 0.139 | 6.369E-01 | 2.748E-01 |
| TMEM211     | 0.139 | 8.044E-01 | 4.599E-01 |
| TM9SF3      | 0.139 | 5.740E-02 | 9.476E-03 |
| MAP2K1      | 0.139 | 7.953E-02 | 8.303E-02 |
| AC244517.10 | 0.139 | 8.579E-01 | 3.375E-03 |
| UGT2B17     | 0.139 | 8.186E-01 | 8.518E-02 |
| SMYD2       | 0.139 | 1.989E-01 | 4.034E-01 |
| IDS         | 0.138 | 2.189E-01 | 3.365E-03 |
| CHRD        | 0.138 | 6.101E-01 | 3.483E-01 |
| NOCT        | 0.138 | 4.522E-01 | 1.049E-02 |
| SPG21       | 0.138 | 1.606E-02 | 4.921E-01 |
| DDAH2       | 0.138 | 4.502E-01 | 1.061E-01 |
| ERCC6       | 0.138 | 2.141E-01 | 1.347E-02 |
| PDE5A       | 0.138 | 4.938E-01 | 7.299E-02 |
| GDAP2       | 0.138 | 4.246E-02 | 2.461E-03 |
| CASP2       | 0.138 | 7.505E-02 | 1.028E-02 |
| ELF3        | 0.138 | 6.198E-01 | 3.122E-01 |
| OAT         | 0.138 | 6.127E-01 | 1.160E-02 |
| CCDC153     | 0.138 | 4.979E-01 | 3.764E-01 |
| PABPC1L2B   | 0.138 | NA        | 2.762E-02 |
| MCUR1       | 0.138 | 1.984E-01 | 8.079E-01 |
| XAGE3       | 0.138 | 9.202E-01 | 6.622E-01 |
| RAD9B       | 0.138 | 5.086E-01 | 6.124E-03 |
| SLC25A35    | 0.138 | 4.907E-01 | 2.833E-01 |
| SBK2        | 0.138 | 8.876E-01 | 7.839E-02 |
| SERP1       | 0.138 | 4.693E-02 | 4.316E-03 |
| PRSS51      | 0.137 | 7.560E-01 | 3.515E-02 |
| MIRLET7A1   | 0.137 | 7.981E-01 | 4.844E-03 |
| POU6F2      | 0.137 | 7.883E-01 | 5.636E-03 |
| C2CD2       | 0.137 | 3.701E-01 | 1.473E-02 |
| SMG9        | 0.137 | 1.511E-01 | 4.740E-01 |
| FAM196A     | 0.137 | 5.246E-01 | 1.246E-02 |
| SHOX2       | 0.137 | 7.318E-01 | 3.660E-02 |
| SMCO4       | 0.137 | 4.279E-01 | 1.181E-01 |
| OR52B6      | 0.137 | NA        | 2.919E-02 |
| CDR2        | 0.137 | 3.215E-01 | 1.655E-01 |
| CORO2B      | 0.137 | 6.483E-01 | 6.654E-01 |

|            |       |           |           |
|------------|-------|-----------|-----------|
| IQGAP1     | 0.137 | 1.691E-01 | 1.473E-01 |
| NEDD4      | 0.137 | 3.415E-01 | 7.725E-01 |
| RNF5       | 0.137 | 1.119E-01 | 8.081E-03 |
| GDF3       | 0.137 | 7.128E-01 | 3.546E-01 |
| RAB11FIP5  | 0.137 | 2.288E-01 | 4.540E-03 |
| ABHD11     | 0.137 | 4.132E-01 | 2.382E-01 |
| AL355987.1 | 0.137 | NA        | 4.221E-01 |
| CACNA2D2   | 0.137 | 5.633E-01 | 5.469E-01 |
| MLLT3      | 0.137 | 4.430E-01 | 3.581E-02 |
| TRNAU1AP   | 0.137 | 1.401E-01 | 9.492E-01 |
| TMEM106B   | 0.137 | 1.629E-01 | 9.432E-01 |
| TMEM170B   | 0.136 | 5.241E-01 | 9.429E-01 |
| BAG2       | 0.136 | 5.635E-01 | 8.880E-01 |
| RAB3C      | 0.136 | 7.489E-01 | 1.612E-01 |
| TAF9B      | 0.136 | 1.884E-01 | 8.242E-01 |
| AC017083.4 | 0.136 | 7.722E-01 | 1.058E-02 |
| ACMSD      | 0.136 | 6.701E-01 | 1.007E-01 |
| CLEC4A     | 0.136 | 6.351E-01 | 1.526E-01 |
| C11orf70   | 0.136 | 5.706E-01 | 8.207E-01 |
| CDO1       | 0.136 | 7.723E-01 | 2.852E-02 |
| NAALADL1   | 0.136 | 5.931E-01 | 8.229E-02 |
| NAAA       | 0.136 | 3.466E-01 | 3.454E-01 |
| TMCO1      | 0.136 | 1.954E-01 | 3.625E-01 |
| C3orf36    | 0.136 | 6.231E-01 | 3.108E-03 |
| ATP6V0D1   | 0.136 | 1.872E-01 | 2.383E-01 |
| CREB3L4    | 0.136 | 3.836E-01 | 1.268E-01 |
| WIPF3      | 0.136 | 6.847E-01 | 3.605E-02 |
| STT3A      | 0.136 | 5.841E-02 | 1.578E-01 |
| SLC25A18   | 0.136 | 4.496E-01 | 5.874E-02 |
| PNMA6F     | 0.135 | NA        | 4.670E-01 |
| GMPR       | 0.135 | 6.393E-01 | 1.839E-01 |
| COQ8A      | 0.135 | 2.757E-01 | 4.400E-01 |
| INPP4B     | 0.135 | 5.549E-01 | 5.440E-05 |
| ZDHHC19    | 0.135 | 7.261E-01 | 1.497E-03 |
| MSH6       | 0.135 | 2.346E-01 | 4.137E-01 |
| C17orf67   | 0.135 | 4.130E-01 | 3.132E-01 |
| TSEN34     | 0.135 | 1.057E-01 | 1.735E-01 |
| ZFP30      | 0.135 | 3.815E-01 | 2.748E-03 |
| SETD7      | 0.135 | 2.434E-01 | 5.114E-01 |
| MIR6780A   | 0.135 | NA        | 2.524E-01 |
| CEP89      | 0.135 | 1.091E-01 | 1.366E-02 |
| FAM98C     | 0.135 | 2.510E-01 | 2.941E-01 |
| C14orf105  | 0.135 | 8.904E-01 | 3.907E-01 |
| RTN4R      | 0.135 | 5.731E-01 | 4.538E-01 |
| CACYBP     | 0.135 | 1.325E-01 | 1.923E-01 |
| ETFB       | 0.135 | 3.617E-01 | 1.641E-02 |
| MYO18A     | 0.135 | 3.232E-01 | 7.331E-01 |
| MUSTN1     | 0.135 | 6.683E-01 | 2.159E-03 |
| SETD3      | 0.135 | 5.291E-02 | 4.140E-01 |
| DERL1      | 0.135 | 8.769E-02 | 7.050E-02 |

|            |       |           |           |
|------------|-------|-----------|-----------|
| GFOD2      | 0.135 | 1.666E-01 | 2.410E-04 |
| LAPTM4A    | 0.135 | 6.877E-02 | 7.165E-02 |
| TGFA       | 0.135 | 5.895E-01 | 7.564E-03 |
| NAT16      | 0.135 | 7.364E-01 | 1.154E-01 |
| C1orf21    | 0.135 | 3.906E-01 | 1.129E-02 |
| STX12      | 0.135 | 3.314E-02 | 1.389E-01 |
| ABHD15     | 0.135 | 2.747E-01 | 3.565E-03 |
| SDF2       | 0.135 | 1.132E-01 | 8.003E-01 |
| FAM19A5    | 0.135 | 6.856E-01 | 3.301E-02 |
| CDK15      | 0.134 | 6.336E-01 | 3.232E-01 |
| SPDYE6     | 0.134 | 4.835E-01 | 1.328E-02 |
| MCOLN1     | 0.134 | 1.230E-01 | 9.277E-01 |
| TMCO3      | 0.134 | 3.123E-01 | 9.222E-01 |
| PRRG4      | 0.134 | 5.013E-01 | 7.571E-01 |
| SOCS5      | 0.134 | 7.123E-02 | 2.440E-02 |
| POLR2K     | 0.134 | 3.231E-01 | 4.680E-02 |
| TBC1D8B    | 0.134 | 3.358E-01 | 3.567E-01 |
| MIR199B    | 0.134 | NA        | 8.586E-01 |
| SEC31A     | 0.134 | 5.858E-02 | 3.539E-03 |
| SPO11      | 0.134 | NA        | 1.115E-04 |
| IQCD       | 0.134 | 5.208E-01 | 1.094E-02 |
| UBE2T      | 0.134 | 3.167E-01 | 3.509E-03 |
| STOML1     | 0.134 | 2.178E-01 | 2.231E-01 |
| PSORS1C1   | 0.134 | 6.207E-01 | 2.185E-01 |
| SAP30      | 0.134 | 2.944E-01 | 6.123E-02 |
| IER5       | 0.134 | 4.652E-01 | 1.531E-01 |
| UGT1A7     | 0.134 | 7.696E-01 | 5.013E-01 |
| ACSS2      | 0.134 | 2.045E-01 | 2.843E-01 |
| CTTNBP2NL  | 0.133 | 1.724E-01 | 1.695E-01 |
| MIR4295    | 0.133 | NA        | 2.722E-01 |
| MIR6505    | 0.133 | NA        | 3.453E-01 |
| STARD3     | 0.133 | 1.854E-01 | 1.907E-03 |
| DHFR2      | 0.133 | 2.517E-01 | 1.701E-02 |
| AC048338.1 | 0.133 | NA        | 5.816E-03 |
| LINGO4     | 0.133 | 7.776E-01 | 5.448E-02 |
| SYT11      | 0.133 | 5.955E-01 | 3.288E-02 |
| NES        | 0.133 | 6.128E-01 | 7.611E-03 |
| TCAP       | 0.133 | 5.549E-01 | 2.761E-03 |
| ZNF154     | 0.133 | 5.392E-01 | 5.198E-01 |
| LEXM       | 0.133 | 7.295E-01 | 6.487E-01 |
| MGAT3      | 0.133 | 7.417E-01 | 1.595E-03 |
| PARP6      | 0.133 | 5.145E-01 | 1.993E-02 |
| LMNA       | 0.133 | 2.722E-01 | 2.494E-04 |
| STK24      | 0.133 | 2.962E-01 | 4.491E-02 |
| PER3       | 0.133 | 5.316E-01 | 4.989E-01 |
| ZFP36      | 0.133 | 5.500E-01 | 2.819E-01 |
| HACD3      | 0.133 | 2.549E-01 | 2.997E-01 |
| BANK1      | 0.133 | 6.244E-01 | 9.922E-02 |
| ACAD9      | 0.133 | 5.209E-02 | 1.990E-01 |
| SH3PXD2B   | 0.133 | 4.028E-01 | 3.394E-02 |

|          |       |           |           |
|----------|-------|-----------|-----------|
| NRM      | 0.133 | 3.669E-01 | 1.378E-02 |
| SPAG16   | 0.133 | 5.209E-01 | 4.304E-03 |
| EXOC6B   | 0.133 | 2.154E-01 | 2.971E-01 |
| PODXL2   | 0.132 | 6.534E-01 | 1.293E-02 |
| ZNF567   | 0.132 | 2.664E-01 | 2.041E-02 |
| IFT20    | 0.132 | 2.312E-01 | 2.317E-01 |
| CTNNBIP1 | 0.132 | 1.691E-01 | 1.159E-02 |
| PQLC2    | 0.132 | 1.501E-01 | 3.045E-01 |
| GYPC     | 0.132 | 6.626E-01 | 5.452E-01 |
| ZMYND15  | 0.132 | 5.366E-01 | 4.296E-01 |
| LHB      | 0.132 | 6.663E-01 | 1.314E-02 |
| CPEB3    | 0.132 | 2.755E-01 | 8.258E-03 |
| COL15A1  | 0.132 | 6.108E-01 | 3.910E-02 |
| IGFBP4   | 0.132 | 4.980E-01 | 3.953E-03 |
| TNFAIP3  | 0.132 | 6.274E-01 | 2.769E-01 |
| HAPLN2   | 0.132 | 7.409E-01 | 3.811E-01 |
| HNRNPH2  | 0.132 | 2.673E-02 | 2.722E-01 |
| FRMD4A   | 0.132 | 4.537E-01 | 4.592E-02 |
| TEX26    | 0.132 | 8.249E-01 | 2.753E-01 |
| LMX1B    | 0.132 | 8.333E-01 | 3.433E-01 |
| EMCN     | 0.132 | 5.686E-01 | 1.626E-01 |
| AFAP1    | 0.132 | 4.261E-01 | 3.022E-01 |
| MIR580   | 0.132 | NA        | 3.499E-04 |
| MRGPRE   | 0.132 | 8.317E-01 | 5.747E-02 |
| CLTCL1   | 0.132 | 6.276E-01 | 4.621E-01 |
| GOLGA5   | 0.132 | 4.989E-02 | 3.271E-01 |
| EPHX3    | 0.132 | 7.782E-01 | 5.636E-03 |
| FNDC10   | 0.132 | 5.778E-01 | 1.005E-01 |
| SH3BP5   | 0.131 | 5.507E-01 | 7.924E-02 |
| CARHSP1  | 0.131 | 4.013E-01 | 9.462E-01 |
| MGST3    | 0.131 | 3.489E-01 | 1.630E-02 |
| C12orf54 | 0.131 | 7.857E-01 | 6.480E-03 |
| SLC41A2  | 0.131 | 6.352E-01 | 3.883E-02 |
| FLOT1    | 0.131 | 1.830E-01 | 3.506E-02 |
| RNF11    | 0.131 | 1.107E-01 | 7.232E-02 |
| TMX2     | 0.131 | 1.104E-01 | 8.753E-02 |
| SYT7     | 0.131 | 6.904E-01 | 7.713E-03 |
| CLPTM1   | 0.131 | 8.173E-02 | 2.280E-01 |
| OSCP1    | 0.131 | 2.941E-01 | 2.481E-01 |
| ZNF486   | 0.131 | 7.415E-01 | 4.871E-02 |
| BMT2     | 0.131 | 1.658E-01 | 1.321E-03 |
| ABCB8    | 0.131 | 1.526E-01 | 4.479E-03 |
| GPC6     | 0.131 | 7.295E-01 | 9.246E-03 |
| EPB41L4A | 0.131 | 5.156E-01 | 4.833E-01 |
| C6orf52  | 0.131 | 6.198E-01 | 3.740E-01 |
| NDC80    | 0.131 | 4.667E-01 | 3.830E-03 |
| RPA2     | 0.131 | 1.351E-01 | 1.233E-03 |
| TSTD1    | 0.131 | 5.341E-01 | 2.489E-01 |
| EDEM3    | 0.131 | 2.250E-01 | 2.523E-02 |
| ADGRF5   | 0.131 | 5.106E-01 | 1.961E-02 |

|            |       |           |           |
|------------|-------|-----------|-----------|
| LARP4B     | 0.131 | 8.636E-02 | 1.668E-01 |
| LRRFIP2    | 0.131 | 1.016E-01 | 1.699E-01 |
| FARP1      | 0.131 | 4.235E-01 | 8.868E-01 |
| ACLY       | 0.130 | 1.635E-01 | 8.726E-02 |
| REEP2      | 0.130 | 6.769E-01 | 8.001E-01 |
| CLPTM1L    | 0.130 | 2.941E-01 | 4.781E-03 |
| C9orf116   | 0.130 | 5.088E-01 | 1.712E-01 |
| PRX        | 0.130 | 4.310E-01 | 3.642E-03 |
| ATRIP      | 0.130 | 4.762E-01 | 5.045E-01 |
| FOXC1      | 0.130 | 5.829E-01 | 8.387E-03 |
| MAP1A      | 0.130 | 6.549E-01 | 1.671E-02 |
| SFXN2      | 0.130 | 4.062E-01 | 5.609E-02 |
| CLIP4      | 0.130 | 5.331E-01 | 4.415E-02 |
| JMJD8      | 0.130 | 1.750E-01 | 3.635E-02 |
| ELOVL7     | 0.130 | 5.552E-01 | 5.445E-02 |
| SPDYE1     | 0.130 | 4.082E-01 | 2.965E-02 |
| ARHGAP8    | 0.130 | 5.299E-01 | 2.198E-02 |
| HSFX2      | 0.130 | 8.595E-01 | 2.693E-01 |
| SHE        | 0.130 | 5.701E-01 | 4.083E-01 |
| OR6C3      | 0.129 | NA        | 7.485E-02 |
| TSPY4      | 0.129 | NA        | 1.576E-02 |
| FDPS       | 0.129 | 2.392E-01 | 1.861E-02 |
| SLC35F5    | 0.129 | 1.479E-01 | 5.606E-02 |
| NMRK2      | 0.129 | 8.421E-01 | 2.314E-01 |
| EZH2       | 0.129 | 4.198E-01 | 1.201E-02 |
| AL772284.2 | 0.129 | NA        | 3.690E-01 |
| C7orf77    | 0.129 | 9.133E-01 | 1.853E-01 |
| FAF1       | 0.129 | 5.387E-02 | 2.635E-02 |
| SCAPER     | 0.129 | 2.746E-01 | 2.712E-01 |
| OC1S5-TXNI | 0.129 | 6.861E-01 | 4.283E-01 |
| SHROOM4    | 0.129 | 5.439E-01 | 1.001E-02 |
| SLC16A3    | 0.129 | 5.561E-01 | 3.819E-01 |
| CABLES2    | 0.129 | 3.236E-01 | 3.107E-01 |
| COG4       | 0.128 | 1.834E-01 | 1.956E-02 |
| TMTC2      | 0.128 | 4.589E-01 | 3.303E-01 |
| FAM76A     | 0.128 | 5.301E-02 | 9.536E-01 |
| REXO5      | 0.128 | 4.083E-01 | 9.536E-01 |
| AC093227.3 | 0.128 | 8.506E-01 | 4.584E-01 |
| SPHK1      | 0.128 | 7.071E-01 | 8.179E-02 |
| OR5P3      | 0.128 | 8.080E-01 | 2.051E-02 |
| NP1PB9     | 0.128 | 7.757E-01 | 6.050E-01 |
| P2RX4      | 0.128 | 4.137E-01 | 1.667E-01 |
| TRIM46     | 0.128 | 5.668E-01 | 6.796E-01 |
| CCR7       | 0.128 | 7.904E-01 | 3.357E-01 |
| MFSD9      | 0.128 | 3.040E-01 | 1.081E-03 |
| BMP8A      | 0.128 | 5.271E-01 | 2.309E-01 |
| ANKRD45    | 0.128 | 7.472E-01 | 1.163E-01 |
| ZNF25      | 0.128 | 2.278E-01 | 8.532E-03 |
| SAA4       | 0.128 | 8.444E-01 | 3.774E-01 |
| COL6A6     | 0.128 | 7.674E-01 | 1.868E-02 |

|            |       |           |           |
|------------|-------|-----------|-----------|
| ZNF221     | 0.128 | 4.115E-01 | 2.092E-02 |
| SFT2D2     | 0.128 | 2.200E-01 | 3.663E-03 |
| MID1       | 0.128 | 5.032E-01 | 2.114E-02 |
| RBMS3      | 0.128 | 6.383E-01 | 6.314E-03 |
| CHMP3      | 0.128 | 7.169E-02 | 6.433E-01 |
| ITPR1      | 0.127 | 5.601E-01 | 8.486E-02 |
| AL121758.1 | 0.127 | 7.504E-01 | 9.842E-03 |
| EIF1AD     | 0.127 | 6.895E-02 | 4.952E-04 |
| RFWD2      | 0.127 | 1.717E-01 | 5.756E-02 |
| SGCE       | 0.127 | 6.433E-01 | 1.821E-01 |
| PTK7       | 0.127 | 4.663E-01 | 3.809E-01 |
| PRDX6      | 0.127 | 2.792E-01 | 2.947E-03 |
| LMO2       | 0.127 | 5.741E-01 | 8.887E-01 |
| GAB2       | 0.127 | 5.114E-01 | 6.600E-01 |
| RDH5       | 0.127 | 5.659E-01 | 7.761E-02 |
| IER5L      | 0.127 | 5.012E-01 | 6.196E-02 |
| SENP2      | 0.127 | 1.150E-01 | 2.185E-01 |
| RTKN       | 0.127 | 5.314E-01 | 5.104E-01 |
| STIL       | 0.127 | 4.170E-01 | 8.216E-01 |
| SMARCD2    | 0.127 | 1.374E-01 | 5.735E-02 |
| TET3       | 0.127 | 3.753E-01 | 6.039E-02 |
| CCDC151    | 0.127 | 6.938E-01 | 7.206E-01 |
| TPM3       | 0.127 | 1.536E-01 | 2.050E-03 |
| RTN4RL2    | 0.127 | 6.333E-01 | 1.062E-02 |
| LAMC1      | 0.127 | 3.888E-01 | 6.565E-04 |
| ANTD3-TME  | 0.127 | 6.758E-01 | 3.758E-01 |
| ARHGAP1    | 0.126 | 2.110E-01 | 7.380E-03 |
| SYVN1      | 0.126 | 7.644E-02 | 2.146E-02 |
| OSGIN2     | 0.126 | 2.627E-01 | 2.384E-01 |
| ATP10B     | 0.126 | 7.874E-01 | 2.444E-02 |
| NAGA       | 0.126 | 1.891E-01 | 1.548E-01 |
| MALT1      | 0.126 | 3.460E-01 | 1.972E-03 |
| AC007040.2 | 0.126 | 7.002E-01 | 4.936E-01 |
| SCAMP3     | 0.126 | 9.854E-02 | 2.254E-01 |
| GAGE2E     | 0.126 | NA        | 6.498E-02 |
| FOXR2      | 0.126 | NA        | 3.744E-02 |
| MIR1256    | 0.126 | NA        | 1.351E-02 |
| CABP2      | 0.126 | NA        | 2.044E-02 |
| MIR557     | 0.126 | NA        | 9.030E-05 |
| NEB        | 0.126 | 6.620E-01 | 4.408E-01 |
| SNPH       | 0.126 | 5.613E-01 | 2.811E-02 |
| CCDC9      | 0.126 | 8.141E-02 | 4.186E-03 |
| BLZF1      | 0.126 | 1.926E-01 | 2.973E-01 |
| AL021997.3 | 0.126 | 7.494E-01 | 4.260E-01 |
| MORF4L2    | 0.126 | 7.388E-02 | 4.527E-02 |
| SURF4      | 0.126 | 1.637E-01 | 6.357E-03 |
| PLAUR      | 0.126 | 6.173E-01 | 4.316E-02 |
| AL121845.2 | 0.126 | NA        | 2.322E-02 |
| ASH2L      | 0.126 | 3.331E-01 | 1.318E-01 |
| CNBD2      | 0.126 | 5.616E-01 | 1.410E-02 |

|            |       |           |           |
|------------|-------|-----------|-----------|
| MTPN       | 0.126 | 1.674E-01 | 8.446E-01 |
| OSBPL5     | 0.126 | 3.091E-01 | 1.384E-01 |
| PYGO1      | 0.126 | 6.776E-01 | 3.577E-04 |
| MAGEA10    | 0.126 | 8.883E-01 | 1.110E-02 |
| AC011479.1 | 0.126 | 7.294E-01 | 1.527E-02 |
| TMEM57     | 0.126 | 1.334E-01 | 2.686E-01 |
| URI1       | 0.126 | 3.056E-01 | 2.076E-03 |
| CHST11     | 0.126 | 6.632E-01 | 2.945E-01 |
| HP1BP3     | 0.125 | 9.219E-02 | 3.589E-01 |
| MIR4322    | 0.125 | 8.436E-01 | 3.627E-02 |
| CAMK4      | 0.125 | 6.816E-01 | 2.040E-01 |
| AC010531.1 | 0.125 | 6.140E-01 | 6.525E-03 |
| PLAC8L1    | 0.125 | 6.184E-01 | 1.089E-01 |
| CCDC170    | 0.125 | 6.226E-01 | 2.353E-02 |
| C6orf132   | 0.125 | 4.709E-01 | 2.610E-03 |
| KIAA1614   | 0.125 | 4.631E-01 | 1.833E-02 |
| KIFC3      | 0.125 | 4.944E-01 | 5.199E-01 |
| WDYHV1     | 0.125 | 2.356E-01 | 6.014E-01 |
| NEK6       | 0.125 | 5.822E-01 | 8.616E-02 |
| HSPA5      | 0.125 | 2.121E-01 | 7.876E-01 |
| TTC9B      | 0.125 | 6.270E-01 | 3.349E-01 |
| EXT2       | 0.125 | 2.440E-01 | 2.259E-02 |
| PPT2       | 0.125 | 4.270E-01 | 1.366E-01 |
| ZNF695     | 0.125 | 5.559E-01 | 3.503E-03 |
| PTPN20     | 0.125 | 7.944E-01 | 7.636E-04 |
| MYLK4      | 0.125 | 7.460E-01 | 2.585E-03 |
| RNF115     | 0.125 | 8.031E-02 | 3.878E-01 |
| MAP3K13    | 0.125 | 1.992E-01 | 8.569E-03 |
| COMMD9     | 0.125 | 2.205E-01 | 3.424E-01 |
| PKN1       | 0.125 | 4.845E-01 | 4.929E-02 |
| BECN1      | 0.125 | 1.257E-01 | 3.981E-01 |
| HIST1H1D   | 0.125 | 6.958E-01 | 1.751E-02 |
| CLTC       | 0.125 | 1.432E-01 | 3.599E-02 |
| SBDS       | 0.125 | 1.162E-01 | 2.336E-02 |
| C9orf50    | 0.125 | 6.398E-01 | 2.343E-03 |
| POLA1      | 0.125 | 3.104E-01 | 7.390E-01 |
| CELF3      | 0.125 | 7.927E-01 | 8.427E-01 |
| VCL        | 0.124 | 3.468E-01 | 8.325E-01 |
| EIF3K      | 0.124 | 2.931E-01 | 4.327E-01 |
| LIN28B     | 0.124 | 8.819E-01 | 4.569E-03 |
| SEZ6L      | 0.124 | 8.405E-01 | 7.118E-03 |
| C5orf47    | 0.124 | 7.971E-01 | 1.811E-01 |
| SORCS2     | 0.124 | 7.678E-01 | 4.038E-01 |
| FBXO4      | 0.124 | 3.215E-01 | 1.456E-01 |
| NME6       | 0.124 | 1.042E-01 | 1.965E-01 |
| ANO10      | 0.124 | 1.651E-01 | 4.116E-03 |
| SLC37A1    | 0.124 | 5.011E-01 | 8.311E-02 |
| PIGO       | 0.124 | 2.290E-01 | 2.561E-01 |
| ENTPD1     | 0.124 | 3.790E-01 | 5.105E-02 |
| MMP19      | 0.124 | 6.303E-01 | 1.465E-02 |

|            |       |           |           |
|------------|-------|-----------|-----------|
| SLC39A11   | 0.124 | 2.819E-01 | 2.130E-03 |
| AC005697.1 | 0.124 | NA        | 4.339E-01 |
| AKTIP      | 0.124 | 1.983E-01 | 6.798E-03 |
| SAE1       | 0.124 | 1.296E-01 | 1.121E-01 |
| PEX19      | 0.124 | 3.239E-01 | 4.885E-01 |
| HIST1H4K   | 0.124 | 7.120E-01 | 3.771E-03 |
| APLP1      | 0.124 | 7.159E-01 | 1.407E-03 |
| SMC1A      | 0.124 | 2.637E-01 | 1.467E-02 |
| PSMD2      | 0.124 | 2.131E-01 | 8.026E-02 |
| DCAF8      | 0.123 | 2.746E-01 | 1.101E-01 |
| APOOL      | 0.123 | 1.583E-01 | 3.388E-01 |
| NRBP1      | 0.123 | 8.131E-02 | 8.413E-04 |
| SLC9A3R1   | 0.123 | 5.327E-01 | 1.460E-02 |
| C2orf15    | 0.123 | 5.867E-01 | 3.927E-01 |
| SMURF1     | 0.123 | 1.422E-01 | 2.516E-03 |
| AKR1A1     | 0.123 | 1.714E-01 | 1.199E-02 |
| TAF12      | 0.123 | 8.955E-02 | 1.190E-01 |
| S100A16    | 0.123 | 5.943E-01 | 2.837E-01 |
| AC013470.2 | 0.123 | 7.531E-01 | 4.882E-02 |
| GNL3L      | 0.123 | 2.928E-01 | 7.507E-02 |
| TASP1      | 0.123 | 1.713E-01 | 3.386E-01 |
| SEPHS1     | 0.123 | 1.823E-01 | 3.909E-03 |
| TMPPE      | 0.123 | 4.150E-01 | 2.851E-01 |
| VEGFB      | 0.123 | 3.216E-01 | 1.945E-02 |
| CEP85      | 0.123 | 3.555E-01 | 2.120E-02 |
| EMC3       | 0.123 | 1.992E-01 | 9.485E-03 |
| FBXO18     | 0.123 | 1.368E-01 | 9.156E-03 |
| LAMP2      | 0.123 | 3.804E-01 | 3.427E-01 |
| CIB2       | 0.123 | 4.891E-01 | 4.883E-01 |
| FCHSD2     | 0.123 | 1.653E-01 | 2.530E-01 |
| H2AFJ      | 0.123 | 4.931E-01 | 5.208E-01 |
| C1QTNF4    | 0.123 | 7.020E-01 | 3.744E-02 |
| EZH1       | 0.123 | 1.991E-01 | 7.448E-03 |
| HIST1H2AJ  | 0.122 | 7.539E-01 | 1.433E-01 |
| SHCBP1     | 0.122 | 4.868E-01 | 3.464E-01 |
| MUL1       | 0.122 | 8.925E-02 | 1.522E-01 |
| PGAP3      | 0.122 | 4.717E-01 | 5.214E-02 |
| EHD1       | 0.122 | 3.735E-01 | 3.359E-01 |
| POT1       | 0.122 | 1.902E-01 | 3.074E-01 |
| KATNAL1    | 0.122 | 6.338E-01 | 9.380E-01 |
| NLRX1      | 0.122 | 3.061E-01 | 3.062E-01 |
| NSD3       | 0.122 | 3.478E-01 | 5.656E-03 |
| AC004754.1 | 0.122 | 5.935E-01 | 5.366E-03 |
| C20orf204  | 0.122 | 6.352E-01 | 3.705E-01 |
| CD151      | 0.122 | 3.335E-01 | 8.496E-01 |
| HUWE1      | 0.122 | 1.110E-01 | 1.087E-01 |
| AC087289.3 | 0.122 | 6.116E-01 | 4.532E-01 |
| SIDT2      | 0.122 | 2.438E-01 | 1.351E-01 |
| DPAGT1     | 0.122 | 1.302E-01 | 3.827E-01 |
| RANBP9     | 0.122 | 2.324E-01 | 8.112E-01 |



|            |       |           |           |
|------------|-------|-----------|-----------|
| OR1D5      | 0.121 | NA        | 2.223E-03 |
| OR52I2     | 0.121 | NA        | 2.101E-02 |
| TBC1D3F    | 0.121 | 8.592E-01 | 3.947E-01 |
| CTSF       | 0.121 | 5.411E-01 | 1.687E-02 |
| NLRP12     | 0.121 | 6.616E-01 | 3.618E-01 |
| MIR4482    | 0.121 | 7.010E-01 | 1.450E-02 |
| P3H2       | 0.121 | 7.046E-01 | 7.809E-04 |
| SFMBT1     | 0.121 | 2.808E-01 | 6.812E-01 |
| JTB        | 0.121 | 1.685E-01 | 3.246E-02 |
| TRIM8      | 0.121 | 2.922E-01 | 1.192E-02 |
| TANC2      | 0.121 | 4.211E-01 | 6.629E-01 |
| MORF4L1    | 0.121 | 4.852E-02 | 1.651E-01 |
| CAMK2G     | 0.121 | 3.688E-01 | 3.132E-01 |
| IGSF9      | 0.121 | 6.609E-01 | 1.269E-02 |
| ADAM10     | 0.121 | 4.243E-01 | 8.735E-01 |
| RAET1L     | 0.121 | 8.145E-01 | 8.177E-01 |
| CFI        | 0.121 | 6.931E-01 | 1.909E-02 |
| C19orf47   | 0.121 | 2.606E-01 | 2.495E-01 |
| SETD5      | 0.121 | 2.463E-01 | 6.801E-01 |
| ZBTB47     | 0.121 | 3.054E-01 | 3.078E-01 |
| AC104581.3 | 0.121 | NA        | 1.344E-01 |
| STK26      | 0.121 | 4.186E-01 | 1.501E-02 |
| CSF3       | 0.121 | 8.482E-01 | 3.969E-01 |
| YIPF4      | 0.121 | 3.578E-02 | 5.150E-02 |
| YY1AP1     | 0.121 | 8.498E-02 | 4.013E-01 |
| ANXA11     | 0.121 | 3.649E-01 | 1.286E-01 |
| BRAF       | 0.121 | 2.763E-01 | 3.566E-01 |
| BEGAIN     | 0.120 | 6.843E-01 | 6.845E-01 |
| RIBC2      | 0.120 | 5.829E-01 | 7.962E-01 |
| SIK1       | 0.120 | 8.182E-01 | 3.289E-02 |
| CFL1       | 0.120 | 1.583E-01 | 6.116E-01 |
| PCDHA9     | 0.120 | 8.582E-01 | 2.284E-01 |
| DAD1       | 0.120 | 1.237E-01 | 7.032E-02 |
| CLEC3B     | 0.120 | 7.033E-01 | 4.373E-03 |
| KLHL4      | 0.120 | 7.805E-01 | 1.050E-01 |
| RNF19A     | 0.120 | 5.101E-01 | 5.305E-01 |
| CENPF      | 0.120 | 4.966E-01 | 4.186E-01 |
| HSPA1B     | 0.120 | 5.257E-01 | 2.823E-02 |
| KRT8       | 0.120 | 6.298E-01 | 8.410E-02 |
| NUP210L    | 0.120 | 6.000E-01 | 6.182E-03 |
| YME1L1     | 0.120 | 1.233E-01 | 1.001E-02 |
| BHLHE40    | 0.120 | 5.641E-01 | 2.522E-03 |
| KIF9       | 0.120 | 4.075E-01 | 3.168E-04 |
| SLC9A6     | 0.120 | 1.693E-01 | 6.048E-01 |
| RAP1GAP    | 0.120 | 7.107E-01 | 9.735E-02 |
| CADM3      | 0.120 | 8.278E-01 | 6.848E-01 |
| IFT22      | 0.120 | 1.974E-01 | 3.471E-03 |
| C1orf228   | 0.120 | 6.225E-01 | 4.607E-01 |
| SRMS       | 0.120 | 7.227E-01 | 3.018E-02 |
| MIR604     | 0.120 | 8.317E-01 | 2.576E-01 |

|            |       |           |           |
|------------|-------|-----------|-----------|
| MIR1245A   | 0.120 | 9.011E-01 | 3.355E-01 |
| FUOM       | 0.120 | 6.598E-01 | 1.714E-02 |
| PLOD2      | 0.119 | 6.298E-01 | 3.794E-01 |
| PKMYT1     | 0.119 | 5.045E-01 | 7.536E-01 |
| SQLE       | 0.119 | 5.146E-01 | 9.562E-01 |
| ASH1L      | 0.119 | 2.939E-01 | 9.339E-01 |
| RASSF3     | 0.119 | 4.062E-01 | 1.335E-02 |
| TRMT2B     | 0.119 | 1.502E-01 | 5.261E-01 |
| SUSD1      | 0.119 | 3.760E-01 | 1.178E-02 |
| AL672043.1 | 0.119 | NA        | 2.788E-01 |
| APMAP      | 0.119 | 2.122E-01 | 2.550E-01 |
| IMPDH1     | 0.119 | 4.996E-01 | 6.574E-02 |
| OR1J1      | 0.119 | 7.755E-01 | 4.156E-01 |
| RAP2C      | 0.119 | 1.937E-01 | 3.900E-02 |
| TMEM8A     | 0.119 | 2.675E-01 | 2.710E-02 |
| SMTNL2     | 0.119 | 7.780E-01 | 7.477E-02 |
| ITFG1      | 0.119 | 2.121E-01 | 9.576E-02 |
| MIR942     | 0.119 | 8.635E-01 | 3.393E-01 |
| CLIP1      | 0.119 | 3.294E-01 | 5.076E-02 |
| PLXND1     | 0.119 | 5.516E-01 | 2.563E-02 |
| DYNLL2     | 0.119 | 1.713E-01 | 2.455E-01 |
| LMAN2L     | 0.119 | 1.724E-01 | 5.265E-01 |
| ZFP82      | 0.119 | 5.455E-01 | 7.567E-01 |
| SSMEM1     | 0.118 | 8.371E-01 | 1.525E-02 |
| WDR76      | 0.118 | 4.959E-01 | 4.604E-02 |
| TNKS1BP1   | 0.118 | 2.746E-01 | 1.804E-01 |
| SLC13A4    | 0.118 | 6.514E-01 | 5.696E-02 |
| BTD        | 0.118 | 3.051E-01 | 3.166E-02 |
| SLC20A2    | 0.118 | 4.299E-01 | 2.318E-01 |
| TBC1D29    | 0.118 | 7.618E-01 | 7.808E-01 |
| KAZALD1    | 0.118 | 6.387E-01 | 1.815E-02 |
| RANBP17    | 0.118 | 6.887E-01 | 5.028E-04 |
| TCF4       | 0.118 | 5.856E-01 | 1.799E-02 |
| AC010547.4 | 0.118 | NA        | 3.018E-01 |
| UBAC2      | 0.118 | 1.180E-01 | 2.654E-02 |
| APLP2      | 0.118 | 2.616E-01 | 2.941E-03 |
| UBE2Q2     | 0.118 | 2.676E-01 | 9.424E-01 |
| BEX5       | 0.118 | 7.598E-01 | 1.343E-02 |
| AKAP10     | 0.118 | 2.053E-01 | 3.723E-03 |
| SMYD3      | 0.118 | 5.696E-01 | 6.700E-03 |
| MGAT4D     | 0.118 | NA        | 2.993E-01 |
| KIRREL     | 0.118 | 6.352E-01 | 9.491E-03 |
| FHL3       | 0.118 | 4.719E-01 | 1.132E-02 |
| SEC61A1    | 0.118 | 6.444E-02 | 7.175E-02 |
| PPP1R12C   | 0.117 | 2.462E-01 | 6.361E-01 |
| VAMP7      | 0.117 | 2.221E-01 | 4.022E-02 |
| AHNAK2     | 0.117 | 8.067E-01 | 7.661E-03 |
| SLC2A5     | 0.117 | 7.010E-01 | 8.460E-01 |
| FUT2       | 0.117 | 7.084E-01 | 7.225E-03 |
| TBL2       | 0.117 | 1.174E-01 | 8.747E-03 |

|              |       |           |           |
|--------------|-------|-----------|-----------|
| ZFYVE9       | 0.117 | 3.376E-01 | 3.925E-04 |
| MUC12        | 0.117 | 7.271E-01 | 2.730E-01 |
| CALML3       | 0.117 | 8.632E-01 | 5.600E-03 |
| PLCL2        | 0.117 | 6.769E-01 | 1.288E-01 |
| TIGD3        | 0.117 | 6.669E-01 | 3.168E-03 |
| NINJ1        | 0.117 | 4.891E-01 | 2.473E-02 |
| ZDHHC14      | 0.117 | 4.871E-01 | 8.581E-01 |
| NUDT19       | 0.117 | 3.293E-01 | 7.910E-02 |
| OR52N5       | 0.117 | NA        | 8.530E-01 |
| MAP2K3       | 0.117 | 3.451E-01 | 6.799E-02 |
| HUS1         | 0.117 | 9.936E-02 | 5.300E-03 |
| TADA1        | 0.117 | 3.056E-01 | 6.927E-03 |
| HYOU1        | 0.117 | 3.147E-01 | 3.113E-01 |
| ZWINT        | 0.117 | 4.552E-01 | 9.319E-04 |
| KIFAP3       | 0.117 | 3.473E-01 | 1.282E-01 |
| HDAC11       | 0.117 | 5.024E-01 | 2.678E-03 |
| C1orf162     | 0.117 | 6.708E-01 | 1.616E-03 |
| C8orf44-SGK2 | 0.117 | 6.262E-01 | 5.730E-02 |
| PLPPR2       | 0.117 | 4.555E-01 | 3.012E-01 |
| TROVE2       | 0.117 | 3.138E-01 | 3.318E-01 |
| BRCC3        | 0.117 | 2.765E-01 | 2.939E-02 |
| ACTB         | 0.117 | 2.900E-01 | 4.422E-04 |
| PCDHA1       | 0.117 | 8.534E-01 | 1.046E-02 |
| PRKAB2       | 0.117 | 2.999E-01 | 2.373E-01 |
| LIX1L        | 0.116 | 5.030E-01 | 2.978E-02 |
| RAB1A        | 0.116 | 4.494E-02 | 2.949E-02 |
| VGLL4        | 0.116 | 3.966E-01 | 3.267E-01 |
| MAGEA3       | 0.116 | 8.903E-01 | 1.686E-01 |
| SLC22A24     | 0.116 | NA        | 1.898E-01 |
| MIR4435-2    | 0.116 | NA        | 7.019E-02 |
| FAM50A       | 0.116 | 3.348E-01 | 5.889E-02 |
| NMB          | 0.116 | 5.728E-01 | 5.634E-01 |
| FAM131A      | 0.116 | 4.190E-01 | 1.311E-03 |
| BMPR2        | 0.116 | 2.389E-01 | 9.520E-01 |
| PLXNA3       | 0.116 | 3.905E-01 | 9.339E-01 |
| ZNF469       | 0.116 | 7.319E-01 | 8.537E-01 |
| TBC1D3       | 0.116 | 9.380E-01 | 9.872E-03 |
| MYCT1        | 0.116 | 5.841E-01 | 2.675E-03 |
| KCNJ5        | 0.116 | 7.354E-01 | 5.533E-03 |
| SH3D19       | 0.116 | 3.533E-01 | 7.073E-03 |
| ADCY4        | 0.116 | 5.436E-01 | 5.821E-03 |
| UGP2         | 0.116 | 9.926E-02 | 3.019E-02 |
| ACP2         | 0.116 | 3.272E-01 | 2.072E-01 |
| RASA1        | 0.116 | 4.194E-01 | 1.103E-01 |
| MT-ND1       | 0.116 | 6.571E-01 | 4.983E-01 |
| AP000275.2   | 0.115 | 7.738E-01 | 8.186E-01 |
| GPR20        | 0.115 | 7.402E-01 | 4.470E-01 |
| TECTA        | 0.115 | 5.839E-01 | 2.491E-02 |
| SRPRA        | 0.115 | 6.965E-02 | 3.974E-01 |
| AL161911.1   | 0.115 | 5.003E-01 | 1.828E-01 |

|            |       |           |           |
|------------|-------|-----------|-----------|
| RBM17      | 0.115 | 2.334E-01 | 2.376E-02 |
| OR51M1     | 0.115 | NA        | 2.779E-02 |
| OXSRI      | 0.115 | 2.510E-01 | 8.197E-03 |
| TEX9       | 0.115 | 5.199E-01 | 5.517E-02 |
| HEXB       | 0.115 | 2.699E-01 | 7.533E-02 |
| SNX8       | 0.115 | 3.815E-01 | 2.220E-01 |
| PAR6A      | 0.115 | 6.044E-01 | 5.012E-01 |
| CENPBD1    | 0.115 | 4.147E-01 | 1.222E-01 |
| LMTK3      | 0.115 | 6.942E-01 | 1.923E-02 |
| ZEB2       | 0.115 | 6.321E-01 | 3.226E-01 |
| PGD        | 0.115 | 5.711E-01 | 1.517E-01 |
| ARRDC5     | 0.115 | 7.280E-01 | 1.296E-02 |
| MIR6781    | 0.115 | NA        | 6.070E-02 |
| SLC4A2     | 0.115 | 1.997E-01 | 1.407E-01 |
| GOLGA80    | 0.115 | 8.381E-01 | 9.558E-01 |
| PECAM1     | 0.115 | 5.639E-01 | 8.970E-01 |
| AC243547.3 | 0.114 | NA        | 3.283E-01 |
| MBLAC1     | 0.114 | 4.159E-01 | 1.821E-02 |
| MIR4502    | 0.114 | NA        | 6.936E-01 |
| PLCL1      | 0.114 | 6.118E-01 | 2.378E-02 |
| RTN4       | 0.114 | 2.304E-01 | 9.258E-01 |
| MAGI3      | 0.114 | 4.492E-01 | 2.852E-03 |
| C1orf54    | 0.114 | 5.088E-01 | 2.936E-01 |
| CYB5R1     | 0.114 | 5.475E-01 | 1.455E-01 |
| ZFAND2A    | 0.114 | 3.475E-01 | 1.592E-02 |
| RNF13      | 0.114 | 1.642E-01 | 3.127E-02 |
| SRRM1      | 0.114 | 1.444E-01 | 1.970E-02 |
| DCHS1      | 0.114 | 6.408E-01 | 3.624E-02 |
| CUL1       | 0.114 | 8.185E-02 | 4.417E-02 |
| NEK2       | 0.114 | 5.114E-01 | 9.772E-02 |
| GYPE       | 0.114 | 7.380E-01 | 7.078E-01 |
| MIR4779    | 0.114 | NA        | 9.373E-03 |
| HIST1H4D   | 0.114 | 6.958E-01 | 5.197E-02 |
| HSPA13     | 0.114 | 3.905E-01 | 1.266E-02 |
| PDCD1LG2   | 0.114 | 7.857E-01 | 3.873E-02 |
| ASAH1      | 0.114 | 4.756E-01 | 1.070E-02 |
| CDKL4      | 0.114 | 7.671E-01 | 1.524E-01 |
| DOHH       | 0.114 | 3.536E-01 | 4.492E-01 |
| CNKSR2     | 0.114 | 8.288E-01 | 3.484E-02 |
| NIPA2      | 0.113 | 2.334E-01 | 6.530E-02 |
| TLN1       | 0.113 | 3.461E-01 | 3.886E-01 |
| OGDH       | 0.113 | 1.818E-01 | 2.648E-01 |
| BAG3       | 0.113 | 4.033E-01 | 1.300E-01 |
| RUBCN      | 0.113 | 1.756E-01 | 9.996E-02 |
| SPEM1      | 0.113 | 8.667E-01 | 6.968E-01 |
| MAP3K20    | 0.113 | 5.818E-01 | 8.743E-01 |
| FAM20A     | 0.113 | 7.551E-01 | 8.698E-01 |
| SCG3       | 0.113 | 8.248E-01 | 1.515E-02 |
| KCNS2      | 0.113 | 7.733E-01 | 3.325E-02 |
| TRIT1      | 0.113 | 4.797E-01 | 6.253E-01 |

|            |       |           |           |
|------------|-------|-----------|-----------|
| FITM2      | 0.113 | 3.735E-01 | 4.989E-02 |
| CSRNP1     | 0.113 | 5.330E-01 | 5.445E-02 |
| IFFO1      | 0.113 | 6.367E-01 | 2.482E-01 |
| MED29      | 0.113 | 1.394E-01 | 4.601E-02 |
| HLA-DQB1   | 0.113 | 7.649E-01 | 4.879E-02 |
| ACSF2      | 0.113 | 6.384E-01 | 1.978E-02 |
| THSD7B     | 0.113 | 8.450E-01 | 4.788E-01 |
| NOL3       | 0.113 | 4.828E-01 | 1.521E-01 |
| ZP1        | 0.113 | 7.892E-01 | 3.601E-01 |
| CCSAP      | 0.113 | 3.735E-01 | 3.432E-01 |
| FBXW12     | 0.112 | 7.589E-01 | 5.278E-02 |
| ZMPSTE24   | 0.112 | 2.754E-01 | 1.106E-01 |
| TUBGCP5    | 0.112 | 2.210E-01 | 1.074E-01 |
| PDXK       | 0.112 | 3.743E-01 | 5.500E-01 |
| YIPF3      | 0.112 | 1.977E-01 | 4.017E-01 |
| DNAJC6     | 0.112 | 7.858E-01 | 5.839E-02 |
| GLB1       | 0.112 | 2.456E-01 | 1.174E-01 |
| SUPT5H     | 0.112 | 1.215E-01 | 1.464E-03 |
| ZNF550     | 0.112 | 3.648E-01 | 9.158E-02 |
| CD93       | 0.112 | 6.003E-01 | 4.212E-01 |
| CYB561D2   | 0.112 | 3.723E-01 | 1.975E-02 |
| WFS1       | 0.112 | 4.499E-01 | 1.468E-03 |
| CA14       | 0.112 | 5.867E-01 | 1.938E-03 |
| CYTL1      | 0.112 | 7.227E-01 | 5.081E-01 |
| NAT10      | 0.112 | 3.219E-01 | 5.094E-01 |
| KLHL20     | 0.112 | 2.669E-01 | 1.716E-01 |
| H6PD       | 0.112 | 3.515E-01 | 1.046E-03 |
| CCDC69     | 0.112 | 6.241E-01 | 3.206E-01 |
| ZSWIM4     | 0.112 | 4.014E-01 | 1.555E-01 |
| ATP7A      | 0.112 | 4.016E-01 | 1.717E-02 |
| ZNF420     | 0.112 | 3.973E-01 | 8.295E-01 |
| NPPA       | 0.112 | 7.138E-01 | 1.085E-02 |
| C11orf24   | 0.112 | 3.572E-01 | 5.228E-01 |
| GCC1       | 0.112 | 1.663E-01 | 2.794E-01 |
| FOXE3      | 0.112 | 8.097E-01 | 9.501E-03 |
| AC069368.1 | 0.112 | 7.391E-01 | 9.130E-01 |
| PRKACG     | 0.112 | NA        | 1.074E-03 |
| HYAL3      | 0.112 | 5.194E-01 | 9.586E-02 |
| CFAP57     | 0.112 | 7.085E-01 | 2.014E-01 |
| FAM24A     | 0.111 | NA        | 2.986E-01 |
| GHRL       | 0.111 | 6.072E-01 | 2.269E-02 |
| MB21D2     | 0.111 | 5.442E-01 | 6.524E-02 |
| DPF1       | 0.111 | 7.325E-01 | 2.975E-03 |
| KRT34      | 0.111 | 8.636E-01 | 1.451E-01 |
| NEURL2     | 0.111 | 5.088E-01 | 6.371E-02 |
| CILP2      | 0.111 | 7.614E-01 | 4.798E-01 |
| COBLL1     | 0.111 | 6.269E-01 | 1.463E-01 |
| SLC43A3    | 0.111 | 6.543E-01 | 4.873E-01 |
| PRSS36     | 0.111 | 5.556E-01 | 4.645E-01 |
| TM9SF4     | 0.111 | 2.159E-01 | 4.125E-01 |

|            |       |           |           |
|------------|-------|-----------|-----------|
| RSPO4      | 0.111 | 8.459E-01 | 1.842E-02 |
| FAM26D     | 0.111 | 8.971E-01 | 2.428E-02 |
| AC012651.1 | 0.111 | 6.819E-01 | 2.547E-01 |
| MFSD14B    | 0.111 | 2.558E-01 | 4.666E-01 |
| DNAJB5     | 0.111 | 6.637E-01 | 2.359E-02 |
| MIR4799    | 0.111 | NA        | 7.836E-01 |
| AC008763.2 | 0.111 | 7.946E-01 | 1.229E-01 |
| WNT5B      | 0.111 | 7.660E-01 | 1.660E-02 |
| EPRS       | 0.111 | 2.206E-01 | 8.106E-01 |
| C8G        | 0.111 | 6.417E-01 | 3.504E-01 |
| ATP6V1F    | 0.111 | 1.760E-01 | 5.954E-02 |
| BMF        | 0.111 | 5.731E-01 | 2.117E-02 |
| CNNM4      | 0.111 | 3.863E-01 | 1.224E-02 |
| HM13       | 0.110 | 2.338E-01 | 1.915E-01 |
| SLC22A4    | 0.110 | 5.829E-01 | 9.615E-02 |
| PRKACA     | 0.110 | 1.001E-01 | 2.475E-03 |
| HMGCL      | 0.110 | 2.746E-01 | 3.551E-02 |
| AC005832.4 | 0.110 | 8.319E-01 | 5.064E-03 |
| GINS4      | 0.110 | 5.706E-01 | 3.990E-01 |
| SPI1       | 0.110 | 7.326E-01 | 1.724E-01 |
| C17orf51   | 0.110 | 6.281E-01 | 3.454E-01 |
| BOLA1      | 0.110 | 4.847E-01 | 4.689E-01 |
| TMED4      | 0.110 | 1.986E-01 | 6.140E-01 |
| OR7E24     | 0.110 | NA        | 3.805E-01 |
| OPTN       | 0.110 | 5.416E-01 | 9.082E-01 |
| '6V1G2-DDX | 0.110 | NA        | 7.771E-01 |
| FLRT2      | 0.110 | 7.857E-01 | 5.667E-01 |
| IFNAR1     | 0.110 | 1.118E-01 | 1.497E-02 |
| ARPIN      | 0.110 | 2.920E-01 | 4.556E-02 |
| FOXRED2    | 0.110 | 5.516E-01 | 1.021E-02 |
| EGLN1      | 0.110 | 2.195E-01 | 3.590E-01 |
| SNAPC2     | 0.110 | 2.843E-01 | 2.501E-02 |
| WBP1L      | 0.110 | 1.876E-01 | 2.550E-02 |
| SDC1       | 0.110 | 6.273E-01 | 6.198E-01 |
| MAGEA6     | 0.110 | 9.033E-01 | 4.202E-01 |
| ENAH       | 0.110 | 4.535E-01 | 7.269E-01 |
| C8orf37    | 0.110 | 4.130E-01 | 3.596E-02 |
| EFCAB10    | 0.110 | 5.449E-01 | 3.393E-01 |
| PDCD6IP    | 0.110 | 1.368E-01 | 7.304E-03 |
| ZNF576     | 0.110 | 2.237E-01 | 6.209E-01 |
| TSC22D2    | 0.110 | 4.340E-01 | 5.235E-01 |
| GRK1       | 0.110 | 8.734E-01 | 7.094E-02 |
| KLHDC10    | 0.110 | 1.458E-01 | 2.835E-01 |
| GTPBP4     | 0.109 | 2.634E-01 | 3.936E-01 |
| FANCC      | 0.109 | 4.466E-01 | 8.178E-02 |
| RHEBL1     | 0.109 | 5.902E-01 | 3.947E-01 |
| SPRY4      | 0.109 | 6.043E-01 | 6.992E-02 |
| ARPC1B     | 0.109 | 4.301E-01 | 3.359E-01 |
| CCDC63     | 0.109 | 8.706E-01 | 1.442E-04 |
| STRN       | 0.109 | 2.324E-01 | 1.808E-01 |

|            |       |           |           |
|------------|-------|-----------|-----------|
| REC114     | 0.109 | 7.816E-01 | 1.936E-01 |
| MYH9       | 0.109 | 3.043E-01 | 7.018E-01 |
| VKORC1L1   | 0.109 | 2.221E-01 | 8.209E-03 |
| LAMTOR2    | 0.109 | 3.863E-01 | 3.733E-01 |
| OR2M4      | 0.109 | NA        | 4.149E-01 |
| NATD1      | 0.109 | 4.734E-01 | 1.983E-01 |
| EID3       | 0.109 | 6.724E-01 | 4.316E-01 |
| C5orf42    | 0.109 | 5.070E-01 | 7.227E-01 |
| ABCA8      | 0.109 | 7.909E-01 | 1.722E-02 |
| GCNT4      | 0.109 | 7.441E-01 | 1.198E-01 |
| RABGEF1    | 0.109 | 3.493E-01 | 9.522E-01 |
| PHKA1      | 0.109 | 4.920E-01 | 9.339E-01 |
| NGEF       | 0.109 | 7.209E-01 | 9.286E-01 |
| MTA3       | 0.109 | 1.760E-01 | 2.627E-01 |
| VRK3       | 0.109 | 1.351E-01 | 1.941E-01 |
| DDI1       | 0.109 | NA        | 1.345E-01 |
| FICD       | 0.109 | 2.525E-01 | 9.147E-02 |
| OR5C1      | 0.109 | NA        | 8.131E-01 |
| MPZ        | 0.109 | 6.594E-01 | 2.929E-01 |
| CAPZB      | 0.109 | 1.048E-01 | 4.519E-01 |
| CEP55      | 0.109 | 5.392E-01 | 2.680E-01 |
| ARL3       | 0.108 | 2.970E-01 | 7.419E-01 |
| GBF1       | 0.108 | 1.132E-01 | 3.499E-02 |
| PALMD      | 0.108 | 7.171E-01 | 8.168E-02 |
| FAM220A    | 0.108 | 2.086E-01 | 1.025E-02 |
| TMED5      | 0.108 | 2.848E-01 | 1.494E-01 |
| NPBWR1     | 0.108 | 8.450E-01 | 2.603E-01 |
| ZNF488     | 0.108 | 7.904E-01 | 1.192E-01 |
| AC011455.3 | 0.108 | NA        | 4.615E-01 |
| PIFO       | 0.108 | 7.696E-01 | 4.237E-03 |
| ITPRIP     | 0.108 | 5.541E-01 | 3.715E-02 |
| AC024592.3 | 0.108 | NA        | 3.756E-01 |
| MED1       | 0.108 | 3.558E-01 | 1.249E-01 |
| SLC29A1    | 0.108 | 6.250E-01 | 3.237E-02 |
| APPL1      | 0.108 | 2.647E-01 | 4.698E-01 |
| TTC9C      | 0.108 | 1.335E-01 | 7.443E-02 |
| GLRX       | 0.108 | 6.609E-01 | 2.811E-01 |
| BEX3       | 0.108 | 4.306E-01 | 3.346E-02 |
| TTC21A     | 0.108 | 5.747E-01 | 1.244E-01 |
| BABAM2     | 0.108 | 2.444E-01 | 5.469E-03 |
| LCE1B      | 0.108 | 9.105E-01 | 5.411E-02 |
| AB4B-EGLN  | 0.107 | 7.173E-01 | 9.868E-04 |
| NUDT5      | 0.107 | 3.079E-01 | 7.852E-02 |
| TMEM50A    | 0.107 | 5.781E-02 | 3.560E-02 |
| CC2D2A     | 0.107 | 4.686E-01 | 2.084E-01 |
| HLX        | 0.107 | 5.991E-01 | 2.922E-02 |
| KIAA1683   | 0.107 | 7.442E-01 | 1.403E-01 |
| MYO5A      | 0.107 | 5.889E-01 | 1.164E-02 |
| PRC1       | 0.107 | 5.137E-01 | 7.933E-01 |
| RAD54L     | 0.107 | 5.331E-01 | 1.751E-01 |

|            |       |           |           |
|------------|-------|-----------|-----------|
| SCRN1      | 0.107 | 5.995E-01 | 3.966E-01 |
| HEXA       | 0.107 | 3.147E-01 | 2.007E-02 |
| NPIP8      | 0.107 | 8.614E-01 | 2.445E-01 |
| SHISA7     | 0.107 | 7.973E-01 | 5.177E-01 |
| BARD1      | 0.107 | 4.384E-01 | 2.559E-02 |
| PEX11B     | 0.107 | 1.816E-01 | 2.514E-01 |
| GABARAPL2  | 0.107 | 1.384E-01 | 3.179E-03 |
| C17orf58   | 0.107 | 3.793E-01 | 1.261E-02 |
| BPHL       | 0.107 | 4.289E-01 | 2.050E-01 |
| C1D        | 0.107 | 1.050E-01 | 8.511E-01 |
| SLC37A3    | 0.107 | 1.515E-01 | 6.208E-01 |
| MIR548AM   | 0.107 | NA        | 7.813E-01 |
| BACE2      | 0.107 | 5.038E-01 | 1.892E-01 |
| TRPC7      | 0.107 | 8.711E-01 | 4.565E-01 |
| EEFSEC     | 0.107 | 2.556E-01 | 1.043E-03 |
| C10orf105  | 0.107 | 7.492E-01 | 6.006E-02 |
| COMMD7     | 0.107 | 3.433E-01 | 4.779E-02 |
| AC002996.1 | 0.107 | NA        | 2.541E-02 |
| RNF180     | 0.107 | 6.920E-01 | 5.598E-02 |
| AARS       | 0.107 | 2.931E-01 | 8.836E-01 |
| MIR6813    | 0.107 | 8.602E-01 | 3.052E-01 |
| MBOAT7     | 0.107 | 4.876E-01 | 7.184E-02 |
| GPR173     | 0.106 | 7.295E-01 | 5.009E-02 |
| FAM221A    | 0.106 | 6.410E-01 | 3.302E-02 |
| LSM14A     | 0.106 | 1.625E-01 | 1.896E-03 |
| PFKP       | 0.106 | 5.670E-01 | 1.916E-01 |
| PGRMC1     | 0.106 | 2.542E-01 | 1.249E-01 |
| C1GALT1C1  | 0.106 | 2.109E-01 | 1.942E-02 |
| COPS6      | 0.106 | 1.799E-01 | 9.948E-02 |
| MAP4K4     | 0.106 | 5.012E-01 | 6.355E-01 |
| RYBP       | 0.106 | 3.600E-01 | 1.202E-02 |
| LRRC1      | 0.106 | 4.148E-01 | 5.867E-01 |
| CCDC168    | 0.106 | 7.264E-01 | 1.703E-02 |
| TMEM174    | 0.106 | NA        | 3.261E-02 |
| MED13      | 0.106 | 2.314E-01 | 1.575E-01 |
| PCNA       | 0.106 | 4.284E-01 | 2.621E-02 |
| CYP17A1    | 0.106 | 7.510E-01 | 1.507E-01 |
| ZNF670     | 0.106 | 4.160E-01 | 1.995E-01 |
| PSIP1      | 0.106 | 5.726E-01 | 1.013E-01 |
| CYP11B1    | 0.106 | 8.054E-01 | 2.100E-03 |
| PHF21B     | 0.106 | 8.462E-01 | 2.810E-01 |
| EZR        | 0.106 | 3.874E-01 | 9.352E-01 |
| RTFDC1     | 0.106 | 8.741E-02 | 6.611E-03 |
| PPT1       | 0.106 | 4.257E-01 | 5.031E-03 |
| TMED9      | 0.106 | 2.162E-01 | 6.867E-01 |
| ZNF135     | 0.106 | 7.690E-01 | 1.313E-02 |
| ZNF844     | 0.106 | 5.455E-01 | 1.255E-01 |
| DARS2      | 0.106 | 4.216E-01 | 2.473E-03 |
| PXDNL      | 0.106 | 6.938E-01 | 5.121E-01 |
| SMC3       | 0.106 | 3.555E-01 | 2.829E-01 |



|           |       |           |           |
|-----------|-------|-----------|-----------|
| DCAF13    | 0.105 | 3.880E-01 | 5.128E-01 |
| KIAA0825  | 0.105 | 4.924E-01 | 5.316E-02 |
| UBA1      | 0.105 | 1.678E-01 | 9.510E-02 |
| PTTG1IP   | 0.105 | 3.003E-01 | 4.222E-01 |
| EMC1      | 0.105 | 1.995E-01 | 1.586E-02 |
| TRIM45    | 0.105 | 5.672E-01 | 2.942E-01 |
| KIDINS220 | 0.105 | 3.340E-01 | 5.228E-04 |
| CD82      | 0.105 | 6.795E-01 | 7.109E-01 |
| TM9SF2    | 0.105 | 2.618E-01 | 4.991E-01 |
| ZNF114    | 0.105 | 8.245E-01 | 6.513E-01 |
| ITGA9     | 0.105 | 6.348E-01 | 3.974E-01 |
| NME7      | 0.105 | 4.077E-01 | 3.260E-01 |
| CDH1      | 0.105 | 6.262E-01 | 3.197E-02 |
| PARG      | 0.105 | 2.346E-01 | 4.158E-02 |
| DBP       | 0.105 | 6.030E-01 | 9.185E-02 |
| SLC26A11  | 0.105 | 4.577E-01 | 1.001E-01 |
| ARIH1     | 0.105 | 1.585E-01 | 6.495E-01 |
| TMEM125   | 0.105 | 7.385E-01 | 1.029E-01 |
| SMS       | 0.105 | 4.729E-01 | 5.880E-01 |
| FGGY      | 0.105 | 4.919E-01 | 5.286E-01 |
| TRAPPC6A  | 0.105 | 5.996E-01 | 3.533E-01 |
| LSS       | 0.105 | 4.361E-01 | 4.213E-01 |
| ST7       | 0.105 | 1.491E-01 | 4.613E-01 |
| FAXC      | 0.105 | 7.280E-01 | 3.788E-02 |
| RPN2      | 0.105 | 2.734E-01 | 1.074E-02 |
| TPPP      | 0.105 | 7.612E-01 | 2.582E-02 |
| KCNE2     | 0.105 | 6.637E-01 | 2.231E-02 |
| AGBL1     | 0.105 | NA        | 9.559E-02 |
| DSCAML1   | 0.105 | 8.162E-01 | 8.770E-03 |
| SPNS1     | 0.105 | 3.288E-01 | 5.837E-01 |
| C1orf216  | 0.105 | 3.793E-01 | 6.178E-01 |
| C19orf73  | 0.105 | 5.676E-01 | 3.135E-01 |
| MEIS2     | 0.105 | 6.116E-01 | 3.121E-02 |
| SLC4A1AP  | 0.104 | 9.606E-02 | 2.547E-03 |
| APOF      | 0.104 | 7.992E-01 | 6.673E-02 |
| HDGF      | 0.104 | 2.746E-01 | 5.194E-01 |
| KPRP      | 0.104 | 8.880E-01 | 5.467E-01 |
| TMED2     | 0.104 | 1.739E-01 | 7.630E-02 |
| ATP13A5   | 0.104 | 8.839E-01 | 6.493E-01 |
| CCDC8     | 0.104 | 7.867E-01 | 6.965E-02 |
| TMEM25    | 0.104 | 5.832E-01 | 8.914E-02 |
| PDE1C     | 0.104 | 7.759E-01 | 5.796E-03 |
| JPT2      | 0.104 | 2.051E-01 | 4.049E-01 |
| B3GALT2   | 0.104 | 7.696E-01 | 3.415E-01 |
| ARSG      | 0.104 | 4.593E-01 | 1.550E-01 |
| VAPA      | 0.104 | 2.262E-01 | 1.385E-01 |
| HTRA4     | 0.104 | 7.827E-01 | 7.028E-02 |
| OGG1      | 0.104 | 4.047E-01 | 4.071E-01 |
| GRXCR1    | 0.104 | NA        | 1.163E-01 |
| OR10W1    | 0.104 | NA        | 5.911E-03 |

|           |       |           |           |
|-----------|-------|-----------|-----------|
| GTSF1L    | 0.104 | 8.541E-01 | 1.871E-01 |
| LRRC58    | 0.104 | 3.520E-01 | 7.195E-02 |
| KIAA0355  | 0.104 | 2.558E-01 | 2.314E-01 |
| MAP3K3    | 0.104 | 3.178E-01 | 1.709E-01 |
| ZNF701    | 0.104 | 4.868E-01 | 5.295E-02 |
| DLEU7     | 0.104 | 6.732E-01 | 2.518E-02 |
| PCDHGB6   | 0.104 | 7.002E-01 | 3.015E-01 |
| OR52N1    | 0.103 | NA        | 7.985E-02 |
| MIR4652   | 0.103 | NA        | 2.959E-01 |
| METTL4    | 0.103 | 3.671E-01 | 3.561E-01 |
| PEX13     | 0.103 | 3.958E-01 | 1.610E-02 |
| MIR4525   | 0.103 | NA        | 1.390E-02 |
| C7orf33   | 0.103 | 9.441E-01 | 3.671E-02 |
| TCTN2     | 0.103 | 3.177E-01 | 2.904E-02 |
| RNPUL2-BS | 0.103 | 4.980E-01 | 1.024E-01 |
| ALG3      | 0.103 | 2.545E-01 | 2.086E-02 |
| DONSON    | 0.103 | 4.686E-01 | 6.398E-03 |
| C5AR2     | 0.103 | 7.559E-01 | 1.904E-01 |
| LSR       | 0.103 | 5.257E-01 | 5.426E-02 |
| FEZ1      | 0.103 | 7.321E-01 | 9.516E-01 |
| ZNF665    | 0.103 | 5.732E-01 | 9.466E-01 |
| CD276     | 0.103 | 4.093E-01 | 1.128E-01 |
| POC1A     | 0.103 | 5.089E-01 | 1.698E-01 |
| RSU1      | 0.103 | 3.294E-01 | 8.655E-01 |
| PRSS16    | 0.103 | 6.235E-01 | 1.622E-02 |
| CPTP      | 0.103 | 3.582E-01 | 4.776E-02 |
| ARL8A     | 0.103 | 1.946E-01 | 1.599E-01 |
| UGT8      | 0.102 | 8.660E-01 | 4.225E-01 |
| CEP112    | 0.102 | 6.543E-01 | 3.964E-02 |
| FN3KRP    | 0.102 | 2.597E-01 | 1.479E-02 |
| TSACC     | 0.102 | 5.855E-01 | 3.501E-01 |
| RAMP3     | 0.102 | 6.657E-01 | 1.041E-02 |
| HYDIN     | 0.102 | 8.053E-01 | 1.714E-01 |
| RASEF     | 0.102 | 7.295E-01 | 1.668E-01 |
| GPR52     | 0.102 | 8.088E-01 | 1.808E-02 |
| SLC25A40  | 0.102 | 3.198E-01 | 2.821E-02 |
| DET1      | 0.102 | 3.796E-01 | 8.014E-01 |
| AHR       | 0.102 | 6.118E-01 | 2.160E-01 |
| IFT46     | 0.102 | 2.688E-01 | 6.694E-03 |
| SCGB2B2   | 0.102 | 6.356E-01 | 3.280E-01 |
| PADI3     | 0.102 | 8.570E-01 | 5.583E-01 |
| PNMA6A    | 0.102 | 8.086E-01 | 3.264E-02 |
| SEMA4F    | 0.102 | 5.312E-01 | 2.071E-02 |
| MIR3178   | 0.102 | 8.932E-01 | 3.644E-02 |
| PRRT3     | 0.102 | 6.337E-01 | 3.184E-02 |
| TTC26     | 0.102 | 3.558E-01 | 3.731E-02 |
| GLG1      | 0.102 | 3.228E-01 | 5.479E-01 |
| PIGX      | 0.102 | 3.500E-01 | 4.763E-02 |
| UBE2A     | 0.102 | 1.900E-01 | 2.634E-01 |
| CCDC107   | 0.102 | 4.729E-01 | 1.929E-02 |

|          |       |           |           |
|----------|-------|-----------|-----------|
| HAUS4    | 0.102 | 3.489E-01 | 1.736E-01 |
| SRGAP1   | 0.102 | 5.310E-01 | 8.242E-03 |
| KRCC1    | 0.102 | 4.921E-01 | 7.547E-03 |
| MITF     | 0.102 | 6.903E-01 | 5.161E-01 |
| TTC3     | 0.102 | 3.356E-01 | 3.019E-01 |
| IFT52    | 0.102 | 3.550E-01 | 3.683E-01 |
| AKAP9    | 0.102 | 3.558E-01 | 9.095E-01 |
| FHOD3    | 0.102 | 7.217E-01 | 4.228E-01 |
| TMEM42   | 0.102 | 3.155E-01 | 2.307E-02 |
| MS4A6E   | 0.102 | 8.615E-01 | 2.279E-03 |
| CEP70    | 0.102 | 4.149E-01 | 3.117E-01 |
| PWWP2B   | 0.101 | 5.895E-01 | 2.830E-03 |
| EFCAB2   | 0.101 | 5.386E-01 | 7.131E-01 |
| MIR6801  | 0.101 | 8.715E-01 | 2.374E-02 |
| MIR3691  | 0.101 | NA        | 1.641E-02 |
| WAC      | 0.101 | 1.195E-01 | 5.138E-02 |
| CDS2     | 0.101 | 2.141E-01 | 2.082E-01 |
| WWP1     | 0.101 | 4.060E-01 | 3.418E-03 |
| TBC1D24  | 0.101 | 3.027E-01 | 5.465E-01 |
| PYGO2    | 0.101 | 2.051E-01 | 8.845E-01 |
| KCNA5    | 0.101 | 7.851E-01 | 5.013E-01 |
| PELI1    | 0.101 | 4.786E-01 | 5.446E-02 |
| CIZ1     | 0.101 | 2.185E-01 | 8.086E-02 |
| SLC11A2  | 0.101 | 3.770E-01 | 6.187E-02 |
| KCTD7    | 0.101 | 4.489E-01 | 4.511E-01 |
| LIPJ     | 0.101 | 7.745E-01 | 2.994E-02 |
| MAGEB17  | 0.101 | 8.645E-01 | 2.602E-02 |
| RNF208   | 0.101 | 6.430E-01 | 5.561E-03 |
| DTNB     | 0.101 | 5.690E-01 | 3.953E-01 |
| CDYL     | 0.101 | 2.976E-01 | 3.364E-02 |
| PLSCR2   | 0.101 | 8.249E-01 | 4.683E-01 |
| ZCCHC17  | 0.101 | 1.075E-01 | 1.079E-01 |
| SEMA3E   | 0.101 | 8.201E-01 | 5.199E-02 |
| ZNF845   | 0.101 | 2.931E-01 | 7.290E-02 |
| SMCHD1   | 0.101 | 4.317E-01 | 1.446E-01 |
| CSTL1    | 0.100 | 8.269E-01 | 1.274E-01 |
| ROCK2    | 0.100 | 2.356E-01 | 2.736E-02 |
| CDC42EP1 | 0.100 | 6.396E-01 | 6.148E-02 |
| RAI2     | 0.100 | 7.300E-01 | 2.815E-01 |
| MFSD12   | 0.100 | 5.024E-01 | 6.381E-01 |
| CCIN     | 0.100 | 8.092E-01 | 1.399E-01 |
| RGS3     | 0.100 | 4.082E-01 | 4.558E-02 |
| FADS3    | 0.100 | 7.177E-01 | 9.901E-03 |
| SOGA1    | 0.100 | 4.467E-01 | 4.550E-02 |
| PDIA5    | 0.100 | 4.243E-01 | 3.398E-02 |
| OR56A4   | 0.100 | NA        | 1.133E-01 |
| MIR4635  | 0.100 | 8.096E-01 | 1.156E-03 |
| ANGPTL4  | 0.100 | 7.754E-01 | 5.925E-02 |
| PBLD     | 0.100 | 4.954E-01 | 6.268E-01 |
| HS1BP3   | 0.100 | 2.612E-01 | 6.577E-01 |

|            |       |           |           |
|------------|-------|-----------|-----------|
| PHGDH      | 0.100 | 6.910E-01 | 1.531E-01 |
| MEF2D      | 0.100 | 2.140E-01 | 6.562E-01 |
| GOLGA6B    | 0.100 | NA        | 1.025E-01 |
| KRT36      | 0.100 | 8.192E-01 | 6.885E-01 |
| SLC9A5     | 0.100 | 6.664E-01 | 8.418E-01 |
| CRELD1     | 0.100 | 4.256E-01 | 6.508E-01 |
| SLC29A2    | 0.099 | 6.496E-01 | 4.768E-02 |
| ZC3H12C    | 0.099 | 6.137E-01 | 1.019E-02 |
| TUBA1B     | 0.099 | 4.715E-01 | 9.870E-02 |
| MIR644A    | 0.099 | NA        | 9.348E-02 |
| NAT14      | 0.099 | 6.114E-01 | 3.161E-02 |
| PDAP1      | 0.099 | 1.770E-01 | 4.979E-01 |
| ARHGAP15   | 0.099 | 7.443E-01 | 1.773E-01 |
| CLCC1      | 0.099 | 1.856E-01 | 5.996E-02 |
| WDR45B     | 0.099 | 2.580E-01 | 9.963E-02 |
| C16orf86   | 0.099 | 6.025E-01 | 2.277E-02 |
| LYZL4      | 0.099 | 8.880E-01 | 1.576E-02 |
| GABRG3     | 0.099 | 8.884E-01 | 3.921E-02 |
| HERC5      | 0.099 | 7.544E-01 | 6.140E-01 |
| FNBP1      | 0.099 | 5.622E-01 | 1.048E-01 |
| TUBB6      | 0.099 | 7.722E-01 | 3.689E-02 |
| FAM3C      | 0.099 | 5.816E-01 | 2.019E-02 |
| GK2        | 0.099 | NA        | 4.203E-01 |
| TIGD7      | 0.099 | 5.696E-01 | 9.759E-03 |
| OR4C6      | 0.099 | NA        | 3.340E-01 |
| MYL12A     | 0.099 | 3.711E-01 | 5.238E-02 |
| MEA1       | 0.099 | 3.355E-01 | 4.906E-02 |
| PTGFR      | 0.099 | 8.283E-01 | 4.253E-01 |
| PLGRKT     | 0.098 | 5.749E-01 | 4.170E-01 |
| LHX3       | 0.098 | 8.998E-01 | 2.393E-01 |
| ARHGAP24   | 0.098 | 6.860E-01 | 4.308E-01 |
| PSMC2      | 0.098 | 1.257E-01 | 3.106E-01 |
| INPP5F     | 0.098 | 3.493E-01 | 7.818E-02 |
| C16orf62   | 0.098 | 4.726E-01 | 3.399E-02 |
| RBM42      | 0.098 | 2.964E-01 | 2.114E-01 |
| FP565260.6 | 0.098 | 6.501E-01 | 2.944E-02 |
| FAM151B    | 0.098 | 4.244E-01 | 5.412E-02 |
| AC010522.1 | 0.098 | 6.949E-01 | 5.020E-02 |
| MIR3125    | 0.098 | 8.858E-01 | 9.468E-01 |
| SYDE2      | 0.098 | 6.274E-01 | 9.375E-01 |
| SLC36A4    | 0.098 | 6.431E-01 | 7.635E-01 |
| PDE2A      | 0.098 | 6.874E-01 | 1.906E-01 |
| ENO3       | 0.098 | 6.335E-01 | 2.458E-02 |
| GANAB      | 0.098 | 1.972E-01 | 9.921E-02 |
| KCTD10     | 0.098 | 1.910E-01 | 5.807E-03 |
| MMP14      | 0.098 | 6.127E-01 | 3.581E-01 |
| TLE2       | 0.098 | 7.568E-01 | 7.649E-02 |
| OAZ3       | 0.098 | 5.745E-01 | 1.076E-01 |
| AMOTL1     | 0.098 | 6.516E-01 | 1.935E-01 |
| IQSEC2     | 0.098 | 4.715E-01 | 1.520E-02 |

|          |       |           |           |
|----------|-------|-----------|-----------|
| NMNAT1   | 0.098 | 3.169E-01 | 3.741E-01 |
| PRELID3A | 0.098 | 7.402E-01 | 1.862E-01 |
| GTF2I    | 0.098 | 5.785E-01 | 2.085E-02 |
| RNF24    | 0.098 | 4.800E-01 | 1.434E-01 |
| PTPRU    | 0.098 | 6.599E-01 | 3.134E-02 |
| TOR1AIP1 | 0.098 | 2.414E-01 | 2.211E-01 |
| GBGT1    | 0.098 | 6.655E-01 | 1.819E-01 |
| USP32    | 0.098 | 4.087E-01 | 3.898E-01 |
| MED19    | 0.098 | 2.694E-01 | 5.853E-01 |
| SIK3     | 0.098 | 2.794E-01 | 7.782E-01 |
| CCDC149  | 0.098 | 4.822E-01 | 1.368E-02 |
| HECTD3   | 0.098 | 2.149E-01 | 1.659E-01 |
| B3GALT6  | 0.098 | 4.237E-01 | 2.254E-01 |
| BOK      | 0.098 | 5.793E-01 | 2.141E-01 |
| ELK1     | 0.097 | 2.635E-01 | 6.035E-02 |
| FREM1    | 0.097 | 8.217E-01 | 3.765E-02 |
| QRFP     | 0.097 | 6.599E-01 | 9.020E-02 |
| ATP6V1A  | 0.097 | 3.085E-01 | 3.927E-02 |
| ATP6AP2  | 0.097 | 2.043E-01 | 3.903E-01 |
| THBS3    | 0.097 | 5.990E-01 | 9.113E-01 |
| LIPG     | 0.097 | 7.972E-01 | 1.101E-01 |
| TCF23    | 0.097 | 8.603E-01 | 8.918E-01 |
| LAMC3    | 0.097 | 7.353E-01 | 1.680E-01 |
| DSN1     | 0.097 | 4.225E-01 | 8.897E-03 |
| PDS5B    | 0.097 | 3.556E-01 | 3.277E-01 |
| LIPA     | 0.097 | 5.533E-01 | 3.171E-01 |
| REL      | 0.097 | 7.010E-01 | 1.025E-01 |
| SAP25    | 0.097 | 7.492E-01 | 9.654E-02 |
| ZNF350   | 0.097 | 6.324E-01 | 3.406E-01 |
| CRTC3    | 0.097 | 1.814E-01 | 3.720E-01 |
| LMAN1    | 0.097 | 3.524E-01 | 3.862E-01 |
| CCDC6    | 0.097 | 2.937E-01 | 6.332E-01 |
| TEC      | 0.097 | 5.162E-01 | 4.709E-01 |
| HEG1     | 0.097 | 6.708E-01 | 2.151E-01 |
| SUMF2    | 0.097 | 4.422E-01 | 4.382E-01 |
| PRICKLE1 | 0.097 | 7.745E-01 | 8.184E-01 |
| DMPK     | 0.097 | 5.228E-01 | 5.199E-01 |
| STK19    | 0.097 | 2.421E-01 | 1.458E-02 |
| ABL2     | 0.097 | 4.374E-01 | 6.629E-01 |
| MARVELD1 | 0.097 | 6.462E-01 | 3.352E-03 |
| LRRC63   | 0.097 | 8.174E-01 | 5.149E-01 |
| SCGB1C1  | 0.097 | NA        | 7.153E-02 |
| FAM111B  | 0.097 | 6.777E-01 | 1.337E-01 |
| P4HA2    | 0.097 | 5.651E-01 | 3.279E-02 |
| CLCN4    | 0.096 | 7.172E-01 | 1.324E-02 |
| MIR6127  | 0.096 | NA        | 8.028E-01 |
| EFNA4    | 0.096 | 4.934E-01 | 4.590E-01 |
| CALR     | 0.096 | 2.650E-01 | 1.034E-01 |
| MIRLET7C | 0.096 | NA        | 8.873E-02 |
| MIR569   | 0.096 | NA        | 1.173E-01 |

|            |       |           |           |
|------------|-------|-----------|-----------|
| OR111      | 0.096 | NA        | 1.665E-02 |
| PTTG2      | 0.096 | 8.168E-01 | 1.095E-02 |
| ZNF32      | 0.096 | 4.148E-01 | 4.888E-01 |
| FEZ2       | 0.096 | 2.551E-01 | 3.117E-01 |
| SH3GL2     | 0.096 | 8.903E-01 | 7.546E-01 |
| GPR50      | 0.096 | 9.380E-01 | 3.905E-02 |
| UBE2G1     | 0.096 | 3.154E-01 | 7.301E-03 |
| CYP51A1    | 0.096 | 6.272E-01 | 8.305E-02 |
| GRIN2D     | 0.096 | 8.055E-01 | 5.115E-01 |
| TOMM7      | 0.096 | 3.841E-01 | 3.079E-01 |
| AL117348.2 | 0.096 | 8.731E-01 | 9.838E-03 |
| SWI5       | 0.096 | 4.076E-01 | 3.436E-01 |
| RNF38      | 0.096 | 3.378E-01 | 8.887E-02 |
| SLC1A4     | 0.096 | 6.657E-01 | 1.901E-03 |
| UHRF1BP1L  | 0.096 | 4.301E-01 | 1.039E-01 |
| C4orf45    | 0.096 | 8.815E-01 | 3.470E-01 |
| RABAC1     | 0.096 | 5.104E-01 | 6.093E-01 |
| RGS20      | 0.096 | 8.186E-01 | 9.388E-01 |
| CCP110     | 0.096 | 5.516E-01 | 9.265E-01 |
| CXCL2      | 0.096 | 8.333E-01 | 4.579E-01 |
| ZNF425     | 0.096 | 5.956E-01 | 6.901E-01 |
| QPCTL      | 0.096 | 4.744E-01 | 1.384E-01 |
| CKAP5      | 0.096 | 3.971E-01 | 2.967E-01 |
| FAM153A    | 0.095 | 8.535E-01 | 2.707E-01 |
| TCTE1      | 0.095 | 7.877E-01 | 1.239E-01 |
| POLR2I     | 0.095 | 4.475E-01 | 8.468E-01 |
| LGR6       | 0.095 | 8.446E-01 | 5.510E-01 |
| SLC22A13   | 0.095 | 7.247E-01 | 8.812E-01 |
| LPAR5      | 0.095 | 6.030E-01 | 8.598E-01 |
| AC091959.3 | 0.095 | 7.677E-01 | 8.555E-01 |
| PAM        | 0.095 | 6.310E-01 | 4.239E-03 |
| UBXN2A     | 0.095 | 2.551E-01 | 2.261E-01 |
| MRPS14     | 0.095 | 1.814E-01 | 3.321E-01 |
| RUSC1      | 0.095 | 2.986E-01 | 5.005E-01 |
| SCGB3A2    | 0.095 | 8.623E-01 | 3.878E-01 |
| CALM1      | 0.095 | 2.583E-01 | 1.320E-02 |
| ORM2       | 0.095 | 8.675E-01 | 1.356E-02 |
| MAN1B1     | 0.095 | 3.955E-01 | 2.016E-01 |
| CCZ1B      | 0.095 | 3.828E-01 | 8.427E-01 |
| TMEM159    | 0.095 | 5.217E-01 | 1.775E-02 |
| CHN1       | 0.095 | 6.579E-01 | 1.111E-02 |
| PSENN      | 0.095 | 4.644E-01 | 1.352E-02 |
| GOLGA7     | 0.095 | 2.963E-01 | 1.254E-01 |
| ZNF781     | 0.095 | 7.764E-01 | 2.456E-01 |
| PREX2      | 0.095 | 7.380E-01 | 6.158E-01 |
| MIR4326    | 0.095 | 7.827E-01 | 3.578E-01 |
| SLC2A1     | 0.095 | 7.380E-01 | 2.703E-01 |
| RAB18      | 0.095 | 2.519E-01 | 1.283E-01 |
| NACC2      | 0.095 | 5.920E-01 | 5.856E-01 |
| EMC2       | 0.095 | 2.526E-01 | 5.064E-01 |

|            |       |           |           |
|------------|-------|-----------|-----------|
| SNX17      | 0.095 | 1.615E-01 | 1.007E-01 |
| CA5B       | 0.095 | 4.121E-01 | 4.611E-02 |
| PIH1D2     | 0.095 | 4.835E-01 | 3.632E-01 |
| RRAGA      | 0.095 | 3.489E-01 | 4.181E-01 |
| GALK2      | 0.095 | 3.499E-01 | 5.771E-02 |
| C5orf52    | 0.094 | 8.888E-01 | 1.007E-01 |
| RLF        | 0.094 | 4.715E-01 | 4.504E-01 |
| BRI3       | 0.094 | 4.251E-01 | 5.241E-02 |
| LNP1       | 0.094 | 5.960E-01 | 4.861E-03 |
| YIPF1      | 0.094 | 2.985E-01 | 9.300E-01 |
| DDX10      | 0.094 | 3.189E-01 | 1.103E-01 |
| CARD19     | 0.094 | 4.931E-01 | 6.776E-01 |
| SP6        | 0.094 | 7.867E-01 | 3.535E-01 |
| BEX2       | 0.094 | 7.402E-01 | 2.175E-01 |
| PLXNC1     | 0.094 | 7.011E-01 | 7.407E-01 |
| TMEM150A   | 0.094 | 4.351E-01 | 7.014E-02 |
| ERAL1      | 0.094 | 3.408E-01 | 4.105E-02 |
| SDF4       | 0.094 | 1.786E-01 | 4.892E-02 |
| DHX8       | 0.094 | 1.533E-01 | 4.841E-01 |
| CHPF       | 0.094 | 5.895E-01 | 7.243E-03 |
| SLC51B     | 0.094 | 7.698E-01 | 1.602E-02 |
| SNX33      | 0.094 | 3.714E-01 | 2.900E-01 |
| MTMR14     | 0.094 | 3.678E-01 | 5.854E-02 |
| CALM3      | 0.094 | 2.299E-01 | 3.049E-02 |
| OTX1       | 0.094 | 6.807E-01 | 2.181E-01 |
| ACTR1B     | 0.094 | 2.200E-01 | 6.305E-02 |
| TRADD      | 0.094 | 4.517E-01 | 5.437E-04 |
| OR6A2      | 0.094 | NA        | 1.029E-01 |
| PECR       | 0.094 | 6.511E-01 | 2.418E-02 |
| DMWD       | 0.094 | 2.478E-01 | 3.107E-01 |
| UBC        | 0.094 | 2.613E-01 | 1.045E-02 |
| MFS7       | 0.094 | 6.855E-01 | 6.840E-01 |
| CCER2      | 0.094 | 7.874E-01 | 6.229E-02 |
| SEC22C     | 0.093 | 3.408E-01 | 4.246E-01 |
| AC008763.3 | 0.093 | NA        | 2.934E-02 |
| MIR3163    | 0.093 | NA        | 1.285E-02 |
| HRK        | 0.093 | 8.791E-01 | 6.729E-03 |
| CSN2       | 0.093 | NA        | 7.961E-04 |
| ARPC1A     | 0.093 | 2.234E-01 | 2.690E-02 |
| PTAR1      | 0.093 | 3.918E-01 | 4.201E-02 |
| EGR2       | 0.093 | 7.758E-01 | 5.447E-02 |
| SLC24A3    | 0.093 | 7.831E-01 | 3.004E-01 |
| SARM1      | 0.093 | 6.599E-01 | 3.407E-02 |
| BTBD8      | 0.093 | 6.179E-01 | 7.504E-01 |
| TMEM167B   | 0.093 | 1.476E-01 | 5.017E-01 |
| PMM2       | 0.093 | 5.187E-01 | 2.581E-01 |
| WFDC5      | 0.093 | 8.861E-01 | 2.020E-02 |
| RPGRIP1L   | 0.093 | 4.250E-01 | 6.427E-01 |
| GMDS       | 0.093 | 4.765E-01 | 5.216E-02 |
| FBXO10     | 0.093 | 5.855E-01 | 4.786E-02 |

|           |       |           |           |
|-----------|-------|-----------|-----------|
| UBR4      | 0.093 | 2.622E-01 | 2.939E-01 |
| CCDC102A  | 0.093 | 6.476E-01 | 7.627E-03 |
| LTBP3     | 0.093 | 5.782E-01 | 4.515E-01 |
| ALOX15    | 0.093 | 8.292E-01 | 2.663E-01 |
| NCOA3     | 0.093 | 5.032E-01 | 9.629E-01 |
| ZFPL1     | 0.093 | 2.019E-01 | 9.623E-01 |
| STIM1     | 0.093 | 4.210E-01 | 9.536E-01 |
| ATP6V0B   | 0.093 | 3.620E-01 | 9.493E-01 |
| MIR2116   | 0.093 | 8.317E-01 | 4.757E-01 |
| ZBTB4     | 0.093 | 3.348E-01 | 1.298E-02 |
| SLC9C1    | 0.093 | 7.402E-01 | 5.452E-01 |
| CXCL12    | 0.093 | 8.040E-01 | 2.185E-01 |
| MIR5692B  | 0.093 | NA        | 8.619E-01 |
| ASGR2     | 0.093 | 7.759E-01 | 1.793E-01 |
| MIR8063   | 0.093 | NA        | 1.743E-03 |
| MIR1262   | 0.093 | NA        | 4.803E-01 |
| LYSMD1    | 0.093 | 4.145E-01 | 9.459E-03 |
| E2F6      | 0.092 | 1.917E-01 | 8.545E-02 |
| TIMM23B   | 0.092 | 3.525E-01 | 1.437E-01 |
| CCDC152   | 0.092 | 7.931E-01 | 1.147E-01 |
| HIST2H2AB | 0.092 | 7.921E-01 | 3.591E-03 |
| WASHC5    | 0.092 | 4.006E-01 | 6.736E-03 |
| GUCY1A2   | 0.092 | 7.224E-01 | 1.966E-01 |
| OTOGL     | 0.092 | 7.823E-01 | 4.914E-02 |
| RIT1      | 0.092 | 4.064E-01 | 3.315E-02 |
| MIR1301   | 0.092 | NA        | 2.297E-02 |
| PREB      | 0.092 | 2.516E-01 | 8.991E-02 |
| TSPAN13   | 0.092 | 5.899E-01 | 5.161E-02 |
| PCDHGA12  | 0.092 | 7.558E-01 | 8.557E-01 |
| ZNF568    | 0.092 | 5.975E-01 | 1.752E-01 |
| CD1E      | 0.092 | 8.184E-01 | 8.403E-02 |
| SDCCAG8   | 0.092 | 2.613E-01 | 1.227E-01 |
| MSANTD1   | 0.092 | 6.977E-01 | 2.207E-01 |
| TRIP11    | 0.092 | 2.580E-01 | 1.107E-01 |
| GATAD2B   | 0.092 | 2.696E-01 | 5.348E-01 |
| NCOA6     | 0.092 | 3.139E-01 | 1.377E-01 |
| HCRTR2    | 0.092 | 9.096E-01 | 3.379E-02 |
| PGM3      | 0.092 | 3.414E-01 | 7.757E-01 |
| FYN       | 0.092 | 6.722E-01 | 7.355E-02 |
| C1QL3     | 0.092 | 7.547E-01 | 2.618E-01 |
| FAM228B   | 0.092 | 5.436E-01 | 4.322E-02 |
| SLC41A1   | 0.092 | 5.891E-01 | 3.906E-03 |
| HECW2     | 0.091 | 6.300E-01 | 2.368E-01 |
| RNF32     | 0.091 | 6.047E-01 | 8.701E-02 |
| FSCN2     | 0.091 | 6.807E-01 | 4.834E-01 |
| MIR548AJ2 | 0.091 | NA        | 5.538E-03 |
| OR2V2     | 0.091 | NA        | 6.034E-02 |
| MIR4319   | 0.091 | NA        | 7.818E-01 |
| COG6      | 0.091 | 4.242E-01 | 9.274E-01 |
| KLRG2     | 0.091 | 8.391E-01 | 9.114E-01 |



|            |       |           |           |
|------------|-------|-----------|-----------|
| GP6        | 0.091 | 8.191E-01 | 8.928E-02 |
| VPS50      | 0.091 | 2.570E-01 | 1.507E-01 |
| FAM72D     | 0.091 | 6.769E-01 | 7.985E-02 |
| CDC123     | 0.091 | 3.256E-01 | 4.210E-02 |
| LRCH4      | 0.091 | 4.415E-01 | 4.893E-01 |
| MAGEC1     | 0.091 | 9.437E-01 | 5.271E-01 |
| TSR2       | 0.091 | 2.718E-01 | 2.685E-01 |
| KCNG2      | 0.091 | 7.869E-01 | 2.980E-03 |
| PER1       | 0.091 | 6.826E-01 | 1.292E-01 |
| AGPAT1     | 0.091 | 2.872E-01 | 2.748E-01 |
| CHAF1B     | 0.091 | 5.981E-01 | 4.523E-01 |
| PTP4A2     | 0.091 | 3.236E-01 | 5.903E-01 |
| FP565260.1 | 0.091 | 7.084E-01 | 4.006E-02 |
| PSMD7      | 0.091 | 3.080E-01 | 2.371E-01 |
| ENG        | 0.091 | 5.989E-01 | 8.028E-02 |
| SIGMAR1    | 0.091 | 4.968E-01 | 4.223E-01 |
| SEC23A     | 0.091 | 5.157E-01 | 4.986E-03 |
| LRTOMT     | 0.091 | 4.715E-01 | 2.370E-01 |
| LGALS13    | 0.091 | NA        | 1.927E-01 |
| SLC22A23   | 0.091 | 6.714E-01 | 9.730E-02 |
| C11orf95   | 0.091 | 5.089E-01 | 3.210E-01 |
| LIMK1      | 0.091 | 4.137E-01 | 3.608E-01 |
| VPS26B     | 0.091 | 1.681E-01 | 4.825E-02 |
| MED22      | 0.091 | 4.195E-01 | 6.065E-01 |
| GOLT1B     | 0.091 | 3.344E-01 | 1.759E-02 |
| GRHPR      | 0.091 | 4.256E-01 | 1.469E-01 |
| GNG8       | 0.091 | 8.203E-01 | 3.164E-02 |
| USP48      | 0.091 | 1.719E-01 | 6.033E-04 |
| SLC25A23   | 0.091 | 6.657E-01 | 1.091E-02 |
| ENOX2      | 0.091 | 3.189E-01 | 4.255E-01 |
| HDLBP      | 0.090 | 3.340E-01 | 4.331E-01 |
| C9orf66    | 0.090 | 7.696E-01 | 2.063E-02 |
| OR1G1      | 0.090 | NA        | 3.394E-01 |
| MIR5588    | 0.090 | NA        | 3.775E-01 |
| SLC25A51   | 0.090 | 4.629E-01 | 1.815E-01 |
| PIK3CA     | 0.090 | 3.154E-01 | 1.426E-02 |
| FMR1       | 0.090 | 3.403E-01 | 2.467E-02 |
| WWC2       | 0.090 | 6.321E-01 | 5.941E-03 |
| FXYS5      | 0.090 | 7.180E-01 | 7.227E-01 |
| SIK2       | 0.090 | 3.276E-01 | 2.257E-02 |
| DCTN1      | 0.090 | 2.634E-01 | 4.557E-01 |
| TBC1D20    | 0.090 | 2.193E-01 | 9.637E-01 |
| GSTM2      | 0.090 | 8.631E-01 | 9.637E-01 |
| CLSTN1     | 0.090 | 5.047E-01 | 3.543E-02 |
| PDK2       | 0.090 | 4.579E-01 | 8.732E-03 |
| AC100868.1 | 0.090 | NA        | 8.759E-01 |
| ETV4       | 0.090 | 7.587E-01 | 8.727E-01 |
| PPP5C      | 0.090 | 1.933E-01 | 1.153E-01 |
| IGLON5     | 0.090 | 8.054E-01 | 1.169E-01 |
| SIRPA      | 0.090 | 7.519E-01 | 3.436E-01 |

|          |       |           |           |
|----------|-------|-----------|-----------|
| ADCY3    | 0.090 | 5.270E-01 | 4.194E-01 |
| LRRC52   | 0.090 | NA        | 6.134E-02 |
| VWA7     | 0.090 | 7.060E-01 | 2.732E-02 |
| SYCP1    | 0.090 | 9.229E-01 | 2.249E-01 |
| ZNF674   | 0.090 | 2.890E-01 | 1.764E-01 |
| TAF1L    | 0.090 | 8.604E-01 | 2.067E-01 |
| CPEB1    | 0.090 | 8.254E-01 | 7.649E-03 |
| MAP4     | 0.090 | 3.590E-01 | 2.891E-02 |
| SFMBT2   | 0.090 | 7.290E-01 | 3.117E-01 |
| QSOX1    | 0.090 | 5.516E-01 | 5.823E-02 |
| OR8G1    | 0.090 | NA        | 2.246E-01 |
| PCDHB10  | 0.090 | 7.010E-01 | 4.773E-03 |
| ZNF461   | 0.090 | 5.098E-01 | 1.553E-02 |
| PPP2R5B  | 0.090 | 4.288E-01 | 1.846E-01 |
| CLDN18   | 0.089 | 8.278E-01 | 4.220E-02 |
| WDPCP    | 0.089 | 3.347E-01 | 8.121E-02 |
| CCDC33   | 0.089 | 8.807E-01 | 6.483E-03 |
| RAB6C    | 0.089 | 8.245E-01 | 2.164E-01 |
| ZNF880   | 0.089 | 6.623E-01 | 2.000E-01 |
| KCNJ16   | 0.089 | 8.882E-01 | 3.513E-01 |
| PHC2     | 0.089 | 3.864E-01 | 5.670E-01 |
| GRID2IP  | 0.089 | 7.333E-01 | 7.882E-01 |
| LAGE3    | 0.089 | 5.673E-01 | 4.918E-02 |
| GPR182   | 0.089 | 7.364E-01 | 3.970E-02 |
| FBXO11   | 0.089 | 4.641E-01 | 5.023E-01 |
| TAF6     | 0.089 | 2.794E-01 | 1.744E-02 |
| TBL1XR1  | 0.089 | 4.582E-01 | 1.039E-01 |
| KRTAP3-1 | 0.089 | 9.296E-01 | 3.423E-03 |
| RXFP3    | 0.089 | 8.945E-01 | 1.139E-01 |
| ZNF213   | 0.089 | 3.383E-01 | 2.862E-01 |
| RSPH14   | 0.089 | 8.265E-01 | 1.382E-01 |
| ITIH6    | 0.089 | 8.329E-01 | 9.293E-01 |
| NFASC    | 0.089 | 7.598E-01 | 9.290E-01 |
| C2orf74  | 0.089 | 7.789E-01 | 9.250E-01 |
| RIPK2    | 0.089 | 5.271E-01 | 9.848E-03 |
| GPKOW    | 0.089 | 2.750E-01 | 1.567E-01 |
| COG5     | 0.089 | 3.676E-01 | 8.822E-02 |
| TPST2    | 0.089 | 5.576E-01 | 7.053E-01 |
| SLC25A4  | 0.089 | 5.179E-01 | 6.817E-03 |
| RPIA     | 0.089 | 5.118E-01 | 5.532E-04 |
| FNDC5    | 0.089 | 7.739E-01 | 6.411E-01 |
| SEL1L    | 0.089 | 2.931E-01 | 1.678E-01 |
| CUL2     | 0.089 | 2.450E-01 | 2.540E-01 |
| CCNY     | 0.089 | 2.063E-01 | 3.243E-01 |
| ZNF585A  | 0.089 | 4.773E-01 | 1.068E-01 |
| BBS9     | 0.089 | 3.578E-01 | 2.025E-02 |
| UPP2     | 0.089 | 8.369E-01 | 7.698E-03 |
| ANO6     | 0.089 | 4.687E-01 | 5.524E-02 |
| RAB6A    | 0.089 | 3.189E-01 | 9.253E-01 |
| DYNLRB1  | 0.089 | 4.114E-01 | 1.703E-01 |

|          |       |           |           |
|----------|-------|-----------|-----------|
| MCCC2    | 0.088 | 5.803E-01 | 1.483E-01 |
| TPD52L2  | 0.088 | 2.924E-01 | 2.989E-01 |
| MCMDC2   | 0.088 | 6.151E-01 | 8.352E-01 |
| ZWILCH   | 0.088 | 4.070E-01 | 8.516E-02 |
| KIF17    | 0.088 | 7.244E-01 | 6.406E-02 |
| SEC11C   | 0.088 | 4.492E-01 | 1.299E-01 |
| ALOX12   | 0.088 | 8.170E-01 | 1.177E-02 |
| PLCD4    | 0.088 | 6.199E-01 | 4.953E-02 |
| MAP3K1   | 0.088 | 5.778E-01 | 1.289E-01 |
| COMTD1   | 0.088 | 6.686E-01 | 3.796E-01 |
| DNAH5    | 0.088 | 8.088E-01 | 7.951E-02 |
| PNMA8A   | 0.088 | 8.450E-01 | 3.638E-01 |
| AGO1     | 0.088 | 2.980E-01 | 6.843E-01 |
| GMPPB    | 0.088 | 3.238E-01 | 5.325E-01 |
| MIR6871  | 0.088 | NA        | 8.602E-01 |
| ZNF260   | 0.088 | 4.789E-01 | 5.118E-01 |
| ZBED6    | 0.088 | 8.015E-01 | 3.139E-01 |
| NEURL3   | 0.088 | 8.577E-01 | 2.222E-02 |
| SEMA3B   | 0.088 | 8.201E-01 | 2.849E-02 |
| PCBP1    | 0.088 | 3.025E-01 | 1.241E-01 |
| TRIM65   | 0.088 | 4.074E-01 | 3.381E-01 |
| MAP3K8   | 0.088 | 6.428E-01 | 3.387E-03 |
| ZNF619   | 0.088 | 4.153E-01 | 1.059E-01 |
| USP39    | 0.088 | 1.810E-01 | 3.204E-01 |
| RBM43    | 0.088 | 4.735E-01 | 1.260E-01 |
| UBE2E1   | 0.088 | 2.772E-01 | 2.347E-02 |
| EIF2AK1  | 0.088 | 2.038E-01 | 1.261E-02 |
| TRAPPC5  | 0.088 | 6.126E-01 | 1.919E-01 |
| ZSCAN18  | 0.088 | 7.441E-01 | 1.572E-02 |
| C2orf16  | 0.088 | 6.149E-01 | 1.509E-01 |
| INCA1    | 0.088 | 5.146E-01 | 2.522E-01 |
| PARVA    | 0.088 | 5.237E-01 | 8.591E-01 |
| CDH24    | 0.088 | 6.382E-01 | 4.124E-02 |
| RHOD     | 0.088 | 7.810E-01 | 2.432E-01 |
| DNMT3A   | 0.088 | 4.844E-01 | 9.215E-01 |
| CYP2W1   | 0.088 | 8.858E-01 | 5.897E-01 |
| C16orf70 | 0.087 | 3.377E-01 | 8.860E-01 |
| PCSK1N   | 0.087 | 8.694E-01 | 8.825E-01 |
| TMEM30A  | 0.087 | 3.540E-01 | 1.186E-01 |
| TIPRL    | 0.087 | 3.116E-01 | 6.929E-02 |
| XPO6     | 0.087 | 2.852E-01 | 1.644E-01 |
| DNAJB11  | 0.087 | 3.258E-01 | 1.138E-01 |
| MIR98    | 0.087 | NA        | 3.587E-01 |
| TMEM53   | 0.087 | 5.025E-01 | 1.856E-02 |
| GADD45A  | 0.087 | 6.064E-01 | 1.001E-01 |
| S100B    | 0.087 | 8.172E-01 | 5.745E-03 |
| C9orf40  | 0.087 | 6.579E-01 | 7.427E-02 |
| H1FO     | 0.087 | 6.402E-01 | 2.619E-02 |
| GDI2     | 0.087 | 4.153E-01 | 7.444E-01 |
| CHN2     | 0.087 | 7.539E-01 | 3.211E-02 |

|            |       |           |           |
|------------|-------|-----------|-----------|
| UBE3C      | 0.087 | 3.403E-01 | 8.144E-03 |
| HAS1       | 0.087 | 8.645E-01 | 9.730E-02 |
| AL033529.1 | 0.087 | 8.531E-01 | 4.085E-01 |
| DNAJC21    | 0.087 | 3.589E-01 | 4.214E-02 |
| CENPX      | 0.087 | 5.272E-01 | 2.381E-02 |
| SUMF1      | 0.087 | 5.271E-01 | 5.400E-01 |
| EIF4EBP2   | 0.087 | 3.251E-01 | 7.889E-01 |
| LPL        | 0.087 | 8.055E-01 | 1.354E-01 |
| RPA3       | 0.087 | 5.010E-01 | 2.378E-01 |
| MIR4530    | 0.087 | 8.906E-01 | 1.834E-01 |
| PANX1      | 0.087 | 6.118E-01 | 3.665E-02 |
| OLFML2B    | 0.087 | 7.879E-01 | 2.265E-01 |
| GDPD1      | 0.087 | 6.582E-01 | 2.491E-01 |
| MCM2       | 0.087 | 6.368E-01 | 8.503E-01 |
| DNAJB13    | 0.087 | 8.582E-01 | 7.509E-01 |
| RUNDC3B    | 0.087 | 7.326E-01 | 1.168E-01 |
| PLIN3      | 0.087 | 5.088E-01 | 5.249E-02 |
| MIR1972-2  | 0.087 | NA        | 1.182E-01 |
| RAB33B     | 0.087 | 4.150E-01 | 4.126E-01 |
| IFITM2     | 0.087 | 7.415E-01 | 9.666E-03 |
| EPN1       | 0.087 | 3.736E-01 | 2.242E-01 |
| GNG11      | 0.087 | 7.062E-01 | 1.305E-01 |
| MIR660     | 0.087 | NA        | 9.431E-01 |
| PTPN3      | 0.087 | 5.442E-01 | 9.389E-01 |
| RBBP7      | 0.086 | 3.348E-01 | 9.269E-01 |
| MIR4312    | 0.086 | 8.910E-01 | 1.511E-02 |
| TMEM241    | 0.086 | 6.336E-01 | 5.343E-01 |
| INPP5B     | 0.086 | 3.441E-01 | 3.926E-01 |
| SYNE2      | 0.086 | 6.128E-01 | 4.783E-01 |
| RFC2       | 0.086 | 4.398E-01 | 3.176E-01 |
| HLA-DQB2   | 0.086 | 8.234E-01 | 4.627E-01 |
| SLC25A32   | 0.086 | 4.535E-01 | 4.240E-01 |
| PLPP3      | 0.086 | 6.122E-01 | 4.633E-01 |
| SERINC3    | 0.086 | 3.708E-01 | 1.355E-01 |
| SOCS6      | 0.086 | 5.331E-01 | 3.626E-02 |
| DUSP21     | 0.086 | NA        | 5.901E-01 |
| CKS1B      | 0.086 | 5.985E-01 | 4.267E-02 |
| LEPROT     | 0.086 | 3.637E-01 | 8.464E-01 |
| SH3GL1     | 0.086 | 3.292E-01 | 4.412E-02 |
| CTIF       | 0.086 | 4.833E-01 | 2.526E-01 |
| CDC42      | 0.086 | 1.756E-01 | 3.646E-01 |
| NCMAP      | 0.086 | 8.513E-01 | 5.080E-01 |
| SSU72      | 0.086 | 2.999E-01 | 2.925E-03 |
| AC245041.1 | 0.086 | 8.903E-01 | 5.314E-02 |
| CDC5L      | 0.086 | 3.232E-01 | 4.396E-02 |
| ZNF571     | 0.086 | 5.896E-01 | 3.220E-01 |
| INSM2      | 0.086 | 8.815E-01 | 4.326E-02 |
| TTC30A     | 0.086 | 6.134E-01 | 5.249E-02 |
| SMC2       | 0.086 | 6.143E-01 | 6.737E-01 |
| SOCS3      | 0.086 | 7.336E-01 | 1.093E-01 |

|            |       |           |           |
|------------|-------|-----------|-----------|
| SLC41A3    | 0.086 | 3.465E-01 | 1.417E-02 |
| CNOT3      | 0.086 | 2.728E-01 | 4.475E-01 |
| HSPA1L     | 0.086 | 4.932E-01 | 5.282E-01 |
| ATF3       | 0.085 | 7.946E-01 | 2.719E-02 |
| CFDP1      | 0.085 | 4.082E-01 | 4.563E-01 |
| GPR4       | 0.085 | 6.638E-01 | 1.191E-01 |
| MXRA5      | 0.085 | 8.061E-01 | 5.096E-02 |
| AC022384.1 | 0.085 | NA        | 6.343E-01 |
| PDXDC1     | 0.085 | 4.497E-01 | 4.769E-01 |
| PGM2       | 0.085 | 5.436E-01 | 4.444E-02 |
| DPH3       | 0.085 | 4.020E-01 | 8.926E-01 |
| PAGR1      | 0.085 | 4.897E-01 | 2.130E-01 |
| SPOCK2     | 0.085 | 7.874E-01 | 3.601E-02 |
| WDTC1      | 0.085 | 3.384E-01 | 2.818E-02 |
| CARD14     | 0.085 | 7.342E-01 | 7.620E-01 |
| GLCCI1     | 0.085 | 6.988E-01 | 7.041E-01 |
| CDH2       | 0.085 | 8.598E-01 | 3.570E-01 |
| SLC38A3    | 0.085 | 8.529E-01 | 1.374E-01 |
| MAMSTR     | 0.085 | 6.972E-01 | 2.889E-01 |
| ZNF541     | 0.085 | 8.436E-01 | 5.411E-04 |
| PLXDC1     | 0.085 | 7.026E-01 | 2.013E-01 |
| CHPF2      | 0.085 | 4.145E-01 | 3.487E-01 |
| AP3M1      | 0.085 | 3.696E-01 | 1.694E-02 |
| P3H1       | 0.085 | 6.137E-01 | 5.652E-03 |
| MIR1273G   | 0.085 | NA        | 4.003E-01 |
| ILF2       | 0.085 | 3.735E-01 | 2.987E-02 |
| SSUH2      | 0.085 | 7.633E-01 | 5.490E-01 |
| AC079594.2 | 0.084 | 8.560E-01 | 3.230E-02 |
| FCRLB      | 0.084 | 8.488E-01 | 3.752E-01 |
| CASTOR2    | 0.084 | 6.272E-01 | 1.373E-02 |
| MOSPD3     | 0.084 | 4.802E-01 | 5.111E-01 |
| HCFC1R1    | 0.084 | 5.629E-01 | 2.371E-01 |
| CERS4      | 0.084 | 8.172E-01 | 2.449E-01 |
| ZFP57      | 0.084 | 9.038E-01 | 6.372E-01 |
| EEA1       | 0.084 | 5.545E-01 | 6.839E-01 |
| FAAP24     | 0.084 | 4.798E-01 | 1.139E-01 |
| CREG1      | 0.084 | 5.935E-01 | 2.638E-01 |
| USP1       | 0.084 | 5.792E-01 | 9.894E-02 |
| COCH       | 0.084 | 8.438E-01 | 2.824E-02 |
| TMEM99     | 0.084 | 5.282E-01 | 8.545E-02 |
| PPP1R1A    | 0.084 | 8.761E-01 | 2.174E-02 |
| SLC26A10   | 0.084 | 8.007E-01 | 3.515E-02 |
| ZDHHC20    | 0.084 | 5.407E-01 | 1.611E-02 |
| LTBP1      | 0.084 | 7.300E-01 | 6.271E-01 |
| OVOL2      | 0.084 | 7.152E-01 | 2.331E-02 |
| RNF26      | 0.084 | 4.355E-01 | 8.654E-02 |
| RDH14      | 0.084 | 2.327E-01 | 4.513E-01 |
| SYNJ1      | 0.084 | 4.822E-01 | 9.049E-01 |
| CC1L-ADOR  | 0.084 | 8.033E-01 | 9.246E-01 |
| NKIRAS2    | 0.084 | 2.042E-01 | 1.899E-01 |

|             |       |           |           |
|-------------|-------|-----------|-----------|
| TMEM50B     | 0.084 | 4.588E-01 | 1.541E-02 |
| ACVR2A      | 0.084 | 5.964E-01 | 5.347E-02 |
| ST3GAL6     | 0.084 | 7.586E-01 | 1.445E-01 |
| MLH1        | 0.084 | 2.921E-01 | 1.124E-01 |
| SASH1       | 0.084 | 6.298E-01 | 6.392E-01 |
| COL18A1     | 0.084 | 7.244E-01 | 2.707E-02 |
| C21orf58    | 0.084 | 6.706E-01 | 9.946E-02 |
| BRSK2       | 0.084 | 8.601E-01 | 5.828E-01 |
| SPACA6      | 0.084 | 7.114E-01 | 3.297E-01 |
| TMBIM1      | 0.084 | 6.519E-01 | 6.740E-01 |
| FAM131B     | 0.084 | 8.184E-01 | 2.458E-01 |
| GPC4        | 0.084 | 7.960E-01 | 2.953E-01 |
| MECR        | 0.084 | 3.430E-01 | 3.405E-02 |
| POTEE       | 0.084 | 8.579E-01 | 7.200E-02 |
| CA11        | 0.084 | 7.171E-01 | 9.656E-01 |
| SLC35B2     | 0.084 | 4.118E-01 | 9.656E-01 |
| ADAMTS10    | 0.084 | 7.464E-01 | 9.571E-01 |
| TIMMDC1     | 0.084 | 2.701E-01 | 9.445E-01 |
| HAGH        | 0.083 | 4.218E-01 | 9.402E-01 |
| C9orf64     | 0.083 | 4.663E-01 | 9.402E-01 |
| PPP1R15B    | 0.083 | 3.996E-01 | 3.950E-02 |
| OSTC        | 0.083 | 3.021E-01 | 6.400E-01 |
| [ASEK-C17or | 0.083 | 5.979E-01 | 6.295E-02 |
| VSIG10      | 0.083 | 6.702E-01 | 1.109E-01 |
| ZBTB37      | 0.083 | 5.426E-01 | 8.229E-01 |
| KCNV1       | 0.083 | 9.479E-01 | 4.902E-02 |
| CAPNS1      | 0.083 | 3.904E-01 | 1.555E-02 |
| UBE2H       | 0.083 | 3.567E-01 | 5.711E-02 |
| MIR6077     | 0.083 | NA        | 7.060E-02 |
| DUSP26      | 0.083 | 8.354E-01 | 4.707E-02 |
| C1orf210    | 0.083 | 7.247E-01 | 6.502E-02 |
| GPR85       | 0.083 | 7.738E-01 | 5.006E-01 |
| MBOAT1      | 0.083 | 7.941E-01 | 8.909E-02 |
| MIR4669     | 0.083 | 9.133E-01 | 1.458E-01 |
| ATP8B3      | 0.083 | 7.675E-01 | 2.714E-01 |
| HK3         | 0.083 | 8.402E-01 | 4.152E-02 |
| ANK1        | 0.083 | 8.404E-01 | 5.089E-02 |
| AC025283.2  | 0.083 | 7.903E-01 | 1.125E-01 |
| TBC1D23     | 0.083 | 3.137E-01 | 4.082E-01 |
| MIR574      | 0.083 | 8.741E-01 | 1.442E-01 |
| GPN1        | 0.083 | 3.056E-01 | 5.102E-03 |
| OR2V1       | 0.083 | NA        | 4.151E-01 |
| TTC29       | 0.083 | 9.164E-01 | 1.180E-02 |
| BPIFA3      | 0.083 | NA        | 2.573E-01 |
| CDC73       | 0.083 | 4.445E-01 | 1.339E-02 |
| TMEM248     | 0.083 | 1.108E-01 | 4.354E-01 |
| EVI5        | 0.083 | 3.427E-01 | 1.084E-02 |
| PRKAR2A     | 0.083 | 4.476E-01 | 4.069E-01 |
| TFG         | 0.082 | 3.714E-01 | 2.743E-02 |
| PEF1        | 0.082 | 2.252E-01 | 3.876E-01 |

|            |       |           |           |
|------------|-------|-----------|-----------|
| TOM1       | 0.082 | 5.025E-01 | 4.407E-01 |
| CERS1      | 0.082 | 8.655E-01 | 8.582E-03 |
| INSIG2     | 0.082 | 4.582E-01 | 2.907E-02 |
| PYGB       | 0.082 | 6.387E-01 | 7.546E-02 |
| RSRC1      | 0.082 | 4.204E-01 | 1.355E-02 |
| CACNB3     | 0.082 | 6.408E-01 | 5.768E-01 |
| ZNF285     | 0.082 | 7.619E-01 | 2.476E-01 |
| LILRB5     | 0.082 | 8.401E-01 | 3.001E-01 |
| TYMS       | 0.082 | 6.884E-01 | 2.008E-02 |
| YPEL1      | 0.082 | 7.909E-01 | 7.625E-02 |
| PRIM1      | 0.082 | 6.124E-01 | 4.072E-01 |
| THTPA      | 0.082 | 5.299E-01 | 1.446E-01 |
| SPRYD3     | 0.082 | 3.460E-01 | 4.837E-01 |
| DDIT3      | 0.082 | 6.609E-01 | 7.056E-01 |
| RTP1       | 0.082 | 9.180E-01 | 1.521E-01 |
| SNAPIN     | 0.082 | 2.895E-01 | 5.096E-03 |
| KBTBD4     | 0.082 | 4.913E-01 | 1.086E-02 |
| MIR5585    | 0.082 | NA        | 4.002E-02 |
| VPS41      | 0.082 | 3.029E-01 | 3.407E-02 |
| FAM8A1     | 0.082 | 4.525E-01 | 9.289E-01 |
| TXNRD3     | 0.082 | 4.912E-01 | 9.134E-01 |
| TAOK1      | 0.082 | 4.752E-01 | 9.064E-01 |
| KIAA2026   | 0.082 | 5.102E-01 | 3.194E-01 |
| S100PBP    | 0.082 | 2.831E-01 | 6.046E-02 |
| SMARCD3    | 0.082 | 7.093E-01 | 8.752E-02 |
| CDK11B     | 0.082 | 1.838E-01 | 3.945E-02 |
| STX1B      | 0.082 | 8.174E-01 | 8.084E-02 |
| SEPHS2     | 0.082 | 4.715E-01 | 2.519E-02 |
| ECHS1      | 0.082 | 5.559E-01 | 2.392E-01 |
| NUAK2      | 0.082 | 7.952E-01 | 4.619E-01 |
| VHL        | 0.082 | 5.404E-01 | 1.498E-02 |
| AC004223.3 | 0.082 | NA        | 1.087E-02 |
| HTRA2      | 0.082 | 3.776E-01 | 5.289E-01 |
| HLCS       | 0.082 | 4.396E-01 | 2.720E-01 |
| CYFIP1     | 0.082 | 3.500E-01 | 1.493E-02 |
| RAB11A     | 0.082 | 4.773E-01 | 2.646E-02 |
| ARHGEF35   | 0.082 | 7.655E-01 | 3.268E-01 |
| EIF1AY     | 0.082 | 9.001E-01 | 7.328E-01 |
| XRCC1      | 0.082 | 3.067E-01 | 8.388E-02 |
| PAGE4      | 0.081 | 9.480E-01 | 7.316E-02 |
| RIDA       | 0.081 | 6.037E-01 | 8.218E-01 |
| ANXA8L1    | 0.081 | 8.211E-01 | 2.730E-02 |
| ENDOD1     | 0.081 | 6.769E-01 | 9.622E-02 |
| VAC14      | 0.081 | 3.826E-01 | 4.873E-01 |
| BAX        | 0.081 | 4.283E-01 | 1.764E-01 |
| L34079.1   | 0.081 | NA        | 7.042E-01 |
| GREB1      | 0.081 | 8.006E-01 | 1.421E-01 |
| SLITRK3    | 0.081 | 9.137E-01 | 5.767E-02 |
| DEFB127    | 0.081 | NA        | 5.065E-01 |
| MIR54802   | 0.081 | NA        | 8.712E-01 |

|            |       |           |           |
|------------|-------|-----------|-----------|
| KPNA6      | 0.081 | 2.345E-01 | 8.368E-01 |
| SOAT1      | 0.081 | 6.036E-01 | 6.824E-02 |
| KIF1BP     | 0.081 | 3.169E-01 | 2.759E-02 |
| ACACA      | 0.081 | 4.930E-01 | 5.719E-01 |
| RASGRF2    | 0.081 | 7.220E-01 | 5.710E-01 |
| MYOF       | 0.081 | 6.305E-01 | 5.189E-01 |
| RNF122     | 0.081 | 6.434E-01 | 5.260E-02 |
| UBE2M      | 0.081 | 4.282E-01 | 2.259E-01 |
| IFNA2      | 0.081 | NA        | 1.082E-01 |
| RAC3       | 0.081 | 7.659E-01 | 9.284E-03 |
| ZNF487     | 0.081 | 5.467E-01 | 4.439E-01 |
| SULT1C4    | 0.081 | 7.874E-01 | 2.681E-01 |
| FAM189B    | 0.081 | 4.715E-01 | 1.139E-02 |
| ZNF146     | 0.081 | 4.392E-01 | 6.094E-02 |
| FAM222A    | 0.081 | 7.435E-01 | 5.426E-01 |
| MLANA      | 0.081 | 7.037E-01 | 7.522E-04 |
| AC011195.2 | 0.080 | 8.883E-01 | 8.521E-02 |
| CD300E     | 0.080 | 8.498E-01 | 4.265E-02 |
| TAF4       | 0.080 | 4.255E-01 | 2.875E-02 |
| ABL1       | 0.080 | 4.497E-01 | 5.001E-01 |
| GARS       | 0.080 | 4.833E-01 | 7.585E-01 |
| SELENON    | 0.080 | 4.064E-01 | 5.314E-01 |
| LDLRAP1    | 0.080 | 5.217E-01 | 6.922E-02 |
| TMEM127    | 0.080 | 2.487E-01 | 9.663E-01 |
| ZNRF1      | 0.080 | 5.126E-01 | 9.651E-01 |
| SSR3       | 0.080 | 3.595E-01 | 9.538E-01 |
| ZFP36L1    | 0.080 | 5.871E-01 | 9.504E-01 |
| HES5       | 0.080 | 8.514E-01 | 3.271E-01 |
| CNP        | 0.080 | 3.802E-01 | 1.375E-02 |
| MIR8083    | 0.080 | NA        | 3.787E-01 |
| HMGA1      | 0.080 | 6.677E-01 | 3.557E-01 |
| CBLN1      | 0.080 | 8.972E-01 | 4.895E-02 |
| CNNM3      | 0.080 | 3.954E-01 | 3.182E-01 |
| PLEKHA2    | 0.080 | 6.108E-01 | 1.772E-01 |
| TMEM120A   | 0.080 | 5.037E-01 | 2.176E-02 |
| KPNA3      | 0.080 | 5.876E-01 | 7.158E-01 |
| GJA5       | 0.080 | 8.169E-01 | 1.060E-02 |
| RNASEL     | 0.080 | 5.405E-01 | 3.874E-01 |
| SNX2       | 0.080 | 4.437E-01 | 4.104E-02 |
| TRIM37     | 0.080 | 4.822E-01 | 4.772E-01 |
| HACD1      | 0.079 | 8.156E-01 | 3.423E-01 |
| ZYX        | 0.079 | 5.951E-01 | 4.980E-01 |
| ZNF667     | 0.079 | 8.569E-01 | 5.204E-02 |
| PCDHGA4    | 0.079 | 7.807E-01 | 4.532E-01 |
| DPM1       | 0.079 | 3.680E-01 | 5.024E-01 |
| SPRY3      | 0.079 | 6.474E-01 | 7.433E-01 |
| WDR7       | 0.079 | 4.085E-01 | 8.788E-01 |
| CERS3      | 0.079 | 8.880E-01 | 5.542E-02 |
| PSMC1      | 0.079 | 4.540E-01 | 3.438E-01 |
| FLVCR1     | 0.079 | 6.942E-01 | 8.222E-01 |



|            |       |           |           |
|------------|-------|-----------|-----------|
| ERGIC1     | 0.079 | 3.483E-01 | 2.553E-02 |
| ZYG11A     | 0.079 | 8.549E-01 | 3.882E-01 |
| ZBTB46     | 0.079 | 6.116E-01 | 1.173E-01 |
| GPX7       | 0.079 | 7.459E-01 | 1.224E-01 |
| RIC1       | 0.079 | 5.551E-01 | 1.452E-01 |
| SPIDR      | 0.079 | 4.001E-01 | 9.930E-02 |
| MTMR6      | 0.079 | 3.838E-01 | 1.049E-02 |
| RLN1       | 0.079 | 8.447E-01 | 1.167E-02 |
| PRRG2      | 0.079 | 6.842E-01 | 3.481E-01 |
| HIST1H4A   | 0.079 | 8.668E-01 | 1.817E-02 |
| PRRC2C     | 0.079 | 5.636E-01 | 1.708E-01 |
| ATP1B2     | 0.079 | 7.851E-01 | 5.253E-01 |
| AAED1      | 0.079 | 7.170E-01 | 1.519E-01 |
| SP2        | 0.079 | 2.940E-01 | 5.125E-01 |
| B3GALT4    | 0.079 | 6.534E-01 | 3.098E-01 |
| CBX1       | 0.079 | 4.414E-01 | 4.482E-01 |
| C2CD6      | 0.079 | 8.570E-01 | 2.994E-01 |
| ARF6       | 0.079 | 3.558E-01 | 9.448E-01 |
| AC133555.3 | 0.079 | NA        | 9.154E-01 |
| MIR520C    | 0.079 | NA        | 9.121E-01 |
| MIR941-5   | 0.079 | NA        | 1.476E-02 |
| PPM1B      | 0.079 | 3.654E-01 | 1.857E-01 |
| EIF3C      | 0.079 | 5.633E-01 | 5.734E-02 |
| NUDT3      | 0.078 | 3.250E-01 | 2.822E-02 |
| USP13      | 0.078 | 6.666E-01 | 9.319E-02 |
| EGFL7      | 0.078 | 7.427E-01 | 4.615E-02 |
| ENSA       | 0.078 | 4.930E-01 | 1.024E-01 |
| KLHL7      | 0.078 | 3.626E-01 | 3.519E-01 |
| JAGN1      | 0.078 | 5.237E-01 | 1.387E-01 |
| IGLL5      | 0.078 | 8.878E-01 | 8.511E-01 |
| STRBP      | 0.078 | 5.568E-01 | 1.473E-01 |
| FNIP2      | 0.078 | 6.036E-01 | 3.389E-01 |
| GDI1       | 0.078 | 3.856E-01 | 4.180E-01 |
| IARS2      | 0.078 | 4.715E-01 | 8.698E-01 |
| ICOSLG     | 0.078 | 8.317E-01 | 4.471E-01 |
| ATG4A      | 0.078 | 3.729E-01 | 1.350E-01 |
| MIR1269A   | 0.078 | NA        | 8.552E-01 |
| SUSD3      | 0.078 | 8.227E-01 | 8.514E-01 |
| OR2A5      | 0.078 | NA        | 8.981E-01 |
| MIR603     | 0.078 | NA        | 2.037E-01 |
| IL4        | 0.078 | 8.470E-01 | 5.403E-01 |
| VPS25      | 0.078 | 3.446E-01 | 6.852E-02 |
| CUBN       | 0.078 | 7.426E-01 | 4.797E-01 |
| ZNF491     | 0.078 | 7.219E-01 | 2.058E-02 |
| RAD1       | 0.078 | 4.631E-01 | 3.054E-02 |
| SLCO2A1    | 0.078 | 7.800E-01 | 1.426E-01 |
| ZMIZ1      | 0.078 | 6.091E-01 | 2.748E-01 |
| ZRANB1     | 0.078 | 5.371E-01 | 3.846E-01 |
| PRKCE      | 0.078 | 5.556E-01 | 6.940E-02 |
| NRDC       | 0.078 | 2.396E-01 | 3.367E-02 |

|            |       |           |           |
|------------|-------|-----------|-----------|
| AP3S2      | 0.078 | 3.156E-01 | 2.315E-02 |
| ZFP69B     | 0.078 | 6.723E-01 | 2.351E-02 |
| PPP3R1     | 0.078 | 1.658E-01 | 6.468E-01 |
| C6orf89    | 0.078 | 2.498E-01 | 1.165E-02 |
| MPP4       | 0.078 | 7.962E-01 | 3.781E-01 |
| CMTM3      | 0.078 | 7.129E-01 | 6.259E-02 |
| F2R        | 0.078 | 7.509E-01 | 5.453E-01 |
| OSBPL2     | 0.078 | 4.705E-01 | 4.378E-01 |
| C2CD4D     | 0.077 | 8.096E-01 | 9.955E-02 |
| ECE1       | 0.077 | 5.523E-01 | 1.152E-01 |
| SLC30A6    | 0.077 | 2.715E-01 | 3.120E-01 |
| BATF3      | 0.077 | 7.918E-01 | 4.148E-01 |
| MRPS33     | 0.077 | 4.708E-01 | 9.670E-01 |
| COL4A2     | 0.077 | 7.295E-01 | 9.670E-01 |
| AC244517.6 | 0.077 | 8.739E-01 | 9.670E-01 |
| XXYLT1     | 0.077 | 5.204E-01 | 9.670E-01 |
| BTNL9      | 0.077 | 8.566E-01 | 9.670E-01 |
| KNG1       | 0.077 | 9.377E-01 | 9.670E-01 |
| HECTD2     | 0.077 | 5.608E-01 | 9.646E-01 |
| ANKRD37    | 0.077 | 7.364E-01 | 2.343E-02 |
| CHSY1      | 0.077 | 5.024E-01 | 2.341E-01 |
| MAFK       | 0.077 | 6.012E-01 | 4.759E-02 |
| ZDHHC6     | 0.077 | 3.330E-01 | 6.744E-01 |
| MAGEB3     | 0.077 | NA        | 2.048E-01 |
| C11orf52   | 0.077 | 8.249E-01 | 1.072E-01 |
| POFUT2     | 0.077 | 5.194E-01 | 3.026E-02 |
| MIR16-2    | 0.077 | NA        | 3.652E-01 |
| MIR4675    | 0.077 | NA        | 1.959E-01 |
| MIR4713    | 0.077 | NA        | 4.196E-01 |
| ACAP3      | 0.077 | 6.378E-01 | 4.165E-01 |
| NCKIPSD    | 0.077 | 5.029E-01 | 9.134E-01 |
| ZNF233     | 0.077 | 7.357E-01 | 9.026E-01 |
| CEACAM19   | 0.077 | 8.196E-01 | 4.984E-01 |
| CDK14      | 0.077 | 7.971E-01 | 2.229E-02 |
| CAMTA1     | 0.076 | 3.973E-01 | 3.559E-01 |
| PUSL1      | 0.076 | 6.037E-01 | 4.462E-01 |
| B3GNT4     | 0.076 | 7.960E-01 | 2.986E-02 |
| KCNK18     | 0.076 | NA        | 4.183E-01 |
| FAM57A     | 0.076 | 5.771E-01 | 6.973E-02 |
| SLC31A1    | 0.076 | 5.246E-01 | 4.316E-01 |
| CCND3      | 0.076 | 5.920E-01 | 8.395E-02 |
| TEX2       | 0.076 | 5.214E-01 | 8.177E-02 |
| CCDC43     | 0.076 | 3.354E-01 | 2.745E-01 |
| PPP4C      | 0.076 | 4.672E-01 | 8.712E-02 |
| SMG7       | 0.076 | 2.730E-01 | 2.989E-01 |
| RAB5C      | 0.076 | 2.969E-01 | 7.512E-01 |
| IGF1R      | 0.076 | 6.923E-01 | 1.286E-01 |
| ZNF565     | 0.076 | 5.224E-01 | 3.467E-02 |
| MKRN1      | 0.076 | 3.174E-01 | 9.235E-03 |
| NPB        | 0.076 | 8.269E-01 | 6.014E-01 |

|            |       |           |           |
|------------|-------|-----------|-----------|
| MICU1      | 0.076 | 3.216E-01 | 5.956E-02 |
| EM189-UBE2 | 0.076 | 8.529E-01 | 4.996E-01 |
| SYT14      | 0.076 | 8.918E-01 | 2.091E-02 |
| AC012531.3 | 0.076 | NA        | 4.277E-01 |
| MIR3617    | 0.076 | NA        | 1.485E-01 |
| HMGB4      | 0.076 | NA        | 1.006E-01 |
| CTNS       | 0.076 | 4.561E-01 | 4.667E-01 |
| TMEM2      | 0.076 | 7.048E-01 | 7.134E-01 |
| B9D1       | 0.076 | 6.708E-01 | 9.441E-02 |
| SPIN1      | 0.076 | 4.445E-01 | 5.084E-01 |
| MKLN1      | 0.076 | 4.492E-01 | 4.621E-02 |
| MAST1      | 0.076 | 8.245E-01 | 1.759E-01 |
| ZNF473     | 0.076 | 4.737E-01 | 1.263E-01 |
| CITED2     | 0.076 | 7.082E-01 | 8.148E-02 |
| MSRB2      | 0.076 | 6.543E-01 | 9.321E-01 |
| FAM229B    | 0.076 | 7.101E-01 | 9.217E-01 |
| MCRIP1     | 0.076 | 6.533E-01 | 7.423E-02 |
| SNX19      | 0.076 | 5.662E-01 | 2.489E-01 |
| FTH1       | 0.076 | 6.142E-01 | 2.755E-02 |
| AC073610.3 | 0.076 | 8.106E-01 | 2.975E-02 |
| CDC37L1    | 0.076 | 5.024E-01 | 3.471E-01 |
| CCDC85C    | 0.076 | 6.559E-01 | 1.076E-01 |
| NADK2      | 0.076 | 5.889E-01 | 6.694E-01 |
| CALR3      | 0.076 | 8.498E-01 | 2.502E-01 |
| C16orf58   | 0.076 | 4.266E-01 | 5.760E-02 |
| IL22RA1    | 0.076 | 8.091E-01 | 7.117E-01 |
| NID1       | 0.075 | 7.583E-01 | 4.788E-02 |
| DLC1       | 0.075 | 7.517E-01 | 9.724E-02 |
| HIST1H3J   | 0.075 | 8.534E-01 | 8.592E-02 |
| ITCH       | 0.075 | 4.034E-01 | 2.774E-03 |
| LYRM1      | 0.075 | 5.711E-01 | 6.741E-01 |
| EXT1       | 0.075 | 7.085E-01 | 5.307E-01 |
| OCRL       | 0.075 | 4.412E-01 | 1.046E-02 |
| TACC2      | 0.075 | 6.921E-01 | 7.755E-02 |
| PCDHGB1    | 0.075 | 8.628E-01 | 7.899E-02 |
| PHACTR4    | 0.075 | 3.379E-01 | 1.761E-01 |
| COPG2      | 0.075 | 4.923E-01 | 7.292E-02 |
| TRAPPC4    | 0.075 | 4.353E-01 | 2.793E-02 |
| BLOC1S3    | 0.075 | 5.089E-01 | 7.951E-02 |
| FKBP14     | 0.075 | 5.738E-01 | 1.863E-01 |
| GNB1       | 0.075 | 2.483E-01 | 3.378E-02 |
| MIR4261    | 0.075 | NA        | 5.671E-01 |
| PTPRH      | 0.075 | 8.599E-01 | 1.732E-01 |
| SERPINI2   | 0.075 | 9.192E-01 | 6.006E-01 |
| SLC35B1    | 0.075 | 3.985E-01 | 5.835E-01 |
| HSPA14     | 0.075 | 4.231E-01 | 7.452E-02 |
| IQGAP2     | 0.075 | 8.034E-01 | 7.839E-02 |
| TSPYL6     | 0.075 | 9.128E-01 | 3.717E-01 |
| GGPS1      | 0.075 | 2.545E-01 | 1.713E-02 |
| MIR5685    | 0.075 | 8.880E-01 | 6.940E-01 |

|            |       |           |           |
|------------|-------|-----------|-----------|
| SAR1A      | 0.075 | 3.240E-01 | 3.695E-01 |
| STH        | 0.075 | NA        | 4.773E-01 |
| TMEM140    | 0.075 | 6.351E-01 | 4.779E-01 |
| R3HCC1L    | 0.075 | 3.381E-01 | 7.606E-02 |
| MIR193B    | 0.075 | NA        | 4.863E-02 |
| MIR2909    | 0.075 | NA        | 1.897E-01 |
| TMEM89     | 0.074 | 8.421E-01 | 1.524E-01 |
| SPDYE16    | 0.074 | 8.879E-01 | 5.935E-02 |
| SLC25A53   | 0.074 | 4.950E-01 | 5.169E-02 |
| PFKFB4     | 0.074 | 7.247E-01 | 3.279E-02 |
| PCTP       | 0.074 | 6.754E-01 | 2.725E-01 |
| B3GNT3     | 0.074 | 8.136E-01 | 2.089E-03 |
| SUN1       | 0.074 | 5.104E-01 | 4.694E-01 |
| ADAM22     | 0.074 | 8.142E-01 | 1.591E-01 |
| KLHL21     | 0.074 | 6.364E-01 | 4.680E-01 |
| PELI3      | 0.074 | 5.475E-01 | 1.175E-01 |
| FAM43A     | 0.074 | 7.769E-01 | 8.471E-02 |
| ARPC4      | 0.074 | 5.713E-01 | 3.366E-02 |
| ZNF165     | 0.074 | 7.192E-01 | 9.078E-01 |
| KRT27      | 0.074 | 9.028E-01 | 4.486E-01 |
| EFNB2      | 0.074 | 7.628E-01 | 1.409E-01 |
| CUTA       | 0.074 | 5.433E-01 | 7.172E-02 |
| S1PR5      | 0.074 | 8.261E-01 | 8.385E-02 |
| NDUFS2     | 0.074 | 5.913E-01 | 3.247E-02 |
| ZBTB8A     | 0.074 | 4.151E-01 | 9.860E-02 |
| BMP1       | 0.074 | 7.334E-01 | 2.881E-02 |
| CPSF3      | 0.074 | 3.555E-01 | 4.193E-01 |
| PNPO       | 0.074 | 5.386E-01 | 9.438E-02 |
| CKAP2L     | 0.074 | 7.283E-01 | 1.102E-01 |
| COL13A1    | 0.074 | 7.638E-01 | 6.536E-02 |
| ZNF644     | 0.074 | 4.004E-01 | 4.426E-01 |
| EIF4A3     | 0.074 | 4.031E-01 | 2.927E-01 |
| ARAF       | 0.074 | 4.204E-01 | 6.601E-02 |
| COPRS      | 0.074 | 6.308E-01 | 5.198E-01 |
| ST6GALNAC  | 0.074 | 8.421E-01 | 6.999E-01 |
| A1BG       | 0.074 | 8.192E-01 | 2.793E-01 |
| ARF1       | 0.074 | 2.197E-01 | 6.369E-02 |
| MIR212     | 0.074 | NA        | 5.244E-02 |
| HIST2H3PS2 | 0.074 | NA        | 2.749E-02 |
| VCY1B      | 0.074 | NA        | 1.099E-01 |
| MIR1224    | 0.074 | NA        | 3.742E-01 |
| MIR4694    | 0.074 | NA        | 2.107E-01 |
| OR10G8     | 0.074 | NA        | 8.589E-01 |
| OR1A2      | 0.074 | NA        | 6.537E-01 |
| OR2G3      | 0.074 | NA        | 3.925E-01 |
| OR4K15     | 0.074 | NA        | 7.782E-02 |
| GRN        | 0.074 | 5.776E-01 | 6.738E-02 |
| DYRK1A     | 0.074 | 4.004E-01 | 5.350E-01 |
| PCDHGA6    | 0.074 | 7.247E-01 | 8.382E-02 |
| ADK        | 0.074 | 6.387E-01 | 9.298E-03 |

|          |       |           |           |
|----------|-------|-----------|-----------|
| SEC24A   | 0.074 | 4.803E-01 | 1.793E-02 |
| DNAJC13  | 0.074 | 3.489E-01 | 1.882E-01 |
| SNX21    | 0.074 | 5.835E-01 | 5.238E-01 |
| IGF2BP2  | 0.074 | 8.739E-01 | 9.447E-01 |
| SEC24C   | 0.074 | 6.795E-01 | 9.410E-01 |
| EMP2     | 0.074 | 7.332E-01 | 9.406E-01 |
| LRFN3    | 0.073 | 5.629E-01 | 9.340E-01 |
| FAM91A1  | 0.073 | 5.238E-01 | 2.108E-02 |
| TPR      | 0.073 | 4.701E-01 | 2.562E-01 |
| NUF2     | 0.073 | 7.396E-01 | 4.007E-01 |
| DMTN     | 0.073 | 8.038E-01 | 3.226E-01 |
| DIRC2    | 0.073 | 5.986E-01 | 7.103E-01 |
| CDKN1B   | 0.073 | 5.405E-01 | 4.359E-01 |
| SERPINH1 | 0.073 | 6.620E-01 | 4.376E-02 |
| CBX7     | 0.073 | 7.062E-01 | 1.077E-02 |
| PHLDA2   | 0.073 | 7.649E-01 | 6.493E-01 |
| KIF4A    | 0.073 | 7.027E-01 | 4.836E-02 |
| NCS1     | 0.073 | 7.048E-01 | 2.350E-01 |
| GLB1L    | 0.073 | 5.852E-01 | 7.242E-02 |
| METTL13  | 0.073 | 5.088E-01 | 1.396E-01 |
| CAMK1    | 0.073 | 7.204E-01 | 2.480E-01 |
| NOL10    | 0.073 | 3.590E-01 | 9.471E-02 |
| ZNF850   | 0.073 | 7.588E-01 | 4.742E-01 |
| OBSL1    | 0.073 | 7.191E-01 | 5.038E-01 |
| TK1      | 0.073 | 6.977E-01 | 5.670E-01 |
| TBCD     | 0.073 | 4.115E-01 | 6.330E-02 |
| PDIA3    | 0.073 | 4.306E-01 | 1.026E-01 |
| RABIF    | 0.073 | 4.107E-01 | 1.651E-01 |
| SLC12A2  | 0.073 | 6.813E-01 | 8.557E-02 |
| TMEM208  | 0.073 | 5.228E-01 | 3.986E-01 |
| PRRC1    | 0.073 | 3.776E-01 | 6.747E-01 |
| RIN2     | 0.073 | 6.877E-01 | 3.184E-01 |
| EIF1B    | 0.073 | 3.970E-01 | 2.490E-01 |
| GKAP1    | 0.073 | 7.185E-01 | 3.879E-01 |
| ARFGEF2  | 0.073 | 5.434E-01 | 1.777E-01 |
| GOLGA8K  | 0.073 | 8.858E-01 | 2.151E-01 |
| HMGCS1   | 0.073 | 7.325E-01 | 4.170E-01 |
| GPATCH1  | 0.073 | 4.157E-01 | 2.466E-01 |
| SMIM11B  | 0.073 | 9.003E-01 | 8.205E-02 |
| MYL6     | 0.073 | 5.652E-01 | 6.276E-02 |
| RAB5B    | 0.073 | 4.667E-01 | 8.673E-01 |
| YAP1     | 0.073 | 6.390E-01 | 7.173E-01 |
| POLE4    | 0.073 | 5.802E-01 | 5.109E-01 |
| NUDCD3   | 0.072 | 3.558E-01 | 3.931E-02 |
| USP26    | 0.072 | 9.450E-01 | 6.548E-01 |
| RPS27L   | 0.072 | 6.088E-01 | 6.528E-01 |
| RNASEH1  | 0.072 | 5.217E-01 | 3.710E-01 |
| SPATA6   | 0.072 | 7.348E-01 | 9.782E-02 |
| KIAA1522 | 0.072 | 6.603E-01 | 9.163E-01 |
| ATRN     | 0.072 | 4.931E-01 | 4.650E-02 |

|          |       |           |           |
|----------|-------|-----------|-----------|
| GMPPA    | 0.072 | 5.136E-01 | 3.573E-02 |
| TMEM182  | 0.072 | 5.964E-01 | 1.482E-02 |
| P2RX7    | 0.072 | 8.199E-01 | 1.304E-01 |
| FUNDC2   | 0.072 | 4.808E-01 | 6.875E-01 |
| ENDOV    | 0.072 | 5.985E-01 | 3.455E-03 |
| MIR5700  | 0.072 | NA        | 9.095E-02 |
| GAA      | 0.072 | 7.149E-01 | 4.156E-01 |
| CASC3    | 0.072 | 4.168E-01 | 7.337E-02 |
| MSC      | 0.072 | 8.534E-01 | 8.073E-01 |
| IPP      | 0.072 | 4.600E-01 | 4.626E-02 |
| SDC4     | 0.072 | 6.931E-01 | 4.484E-01 |
| KIAA1429 | 0.072 | 4.377E-01 | 7.391E-01 |
| KCTD12   | 0.072 | 7.679E-01 | 1.068E-01 |
| CIPC     | 0.072 | 5.024E-01 | 4.745E-02 |
| AIF1     | 0.072 | 8.450E-01 | 2.205E-02 |
| EDEM2    | 0.072 | 4.835E-01 | 3.931E-02 |
| PEX1     | 0.072 | 5.434E-01 | 5.571E-02 |
| ZNF98    | 0.072 | 9.224E-01 | 4.306E-02 |
| CXorf36  | 0.072 | 7.415E-01 | 7.375E-02 |
| SLC13A3  | 0.072 | 8.403E-01 | 3.493E-01 |
| SGMS1    | 0.072 | 6.116E-01 | 1.764E-01 |
| C1GALT1  | 0.072 | 6.020E-01 | 6.745E-02 |
| USP51    | 0.071 | 7.551E-01 | 6.483E-01 |
| PSMD10   | 0.071 | 3.656E-01 | 3.363E-02 |
| SOX14    | 0.071 | 9.678E-01 | 6.244E-02 |
| FBXW5    | 0.071 | 5.777E-01 | 3.188E-01 |
| USP34    | 0.071 | 6.708E-01 | 3.842E-01 |
| BAZ1B    | 0.071 | 3.479E-01 | 9.808E-02 |
| USP14    | 0.071 | 5.131E-01 | 6.975E-01 |
| AEBP2    | 0.071 | 5.643E-01 | 6.145E-01 |
| CHURC1   | 0.071 | 5.847E-01 | 6.899E-02 |
| CDC6     | 0.071 | 6.826E-01 | 7.156E-01 |
| DDB1     | 0.071 | 3.131E-01 | 4.615E-01 |
| ZNF772   | 0.071 | 6.972E-01 | 2.816E-02 |
| H1FX     | 0.071 | 5.607E-01 | 1.084E-01 |
| CALCRL   | 0.071 | 7.580E-01 | 6.816E-02 |
| KIF27    | 0.071 | 5.999E-01 | 6.030E-02 |
| MIR132   | 0.071 | NA        | 4.925E-01 |
| SEC61G   | 0.071 | 6.609E-01 | 5.104E-02 |
| SNX29    | 0.071 | 5.942E-01 | 1.439E-01 |
| IL1RN    | 0.071 | 8.246E-01 | 9.689E-01 |
| ISPD     | 0.071 | 7.086E-01 | 9.539E-01 |
| HAX1     | 0.071 | 3.981E-01 | 8.428E-01 |
| MAK      | 0.071 | 7.482E-01 | 3.861E-01 |
| SCGB1C2  | 0.071 | NA        | 1.578E-01 |
| MIR6809  | 0.071 | NA        | 4.219E-02 |
| PRR23A   | 0.071 | NA        | 1.502E-01 |
| SEC22A   | 0.071 | 3.308E-01 | 1.956E-02 |
| MIR4744  | 0.071 | 9.238E-01 | 3.572E-01 |
| PDLIM5   | 0.071 | 6.387E-01 | 6.414E-02 |

|            |       |           |           |
|------------|-------|-----------|-----------|
| ZNF526     | 0.071 | 4.054E-01 | 2.898E-01 |
| CCDC50     | 0.071 | 5.014E-01 | 7.673E-02 |
| LST1       | 0.071 | 8.319E-01 | 8.844E-01 |
| CDK8       | 0.071 | 4.360E-01 | 5.091E-02 |
| C19orf38   | 0.071 | 8.026E-01 | 7.774E-01 |
| RNF168     | 0.071 | 5.404E-01 | 4.245E-01 |
| AKNAD1     | 0.071 | 8.772E-01 | 2.163E-02 |
| PSEN2      | 0.071 | 5.804E-01 | 2.482E-02 |
| SLC19A1    | 0.071 | 6.847E-01 | 2.903E-02 |
| SYF2       | 0.071 | 3.253E-01 | 4.724E-02 |
| SCYL3      | 0.071 | 5.449E-01 | 1.068E-01 |
| PPP1R3D    | 0.071 | 5.686E-01 | 1.689E-01 |
| GID8       | 0.071 | 4.278E-01 | 2.683E-01 |
| SORD       | 0.070 | 7.307E-01 | 2.392E-01 |
| C2orf68    | 0.070 | 5.003E-01 | 6.567E-01 |
| ZNF747     | 0.070 | 5.312E-01 | 1.794E-01 |
| CYB5R3     | 0.070 | 4.607E-01 | 3.625E-01 |
| NR4A2      | 0.070 | 7.999E-01 | 1.450E-01 |
| ZNF766     | 0.070 | 4.721E-01 | 3.674E-01 |
| CDC48      | 0.070 | 6.996E-01 | 3.649E-02 |
| EM256-PLSC | 0.070 | 7.810E-01 | 2.702E-01 |
| C3orf58    | 0.070 | 7.639E-01 | 1.276E-01 |
| DLG5       | 0.070 | 7.116E-01 | 2.370E-01 |
| KIFC1      | 0.070 | 7.116E-01 | 7.884E-01 |
| APBA2      | 0.070 | 8.504E-01 | 3.405E-01 |
| IL11RA     | 0.070 | 6.842E-01 | 4.605E-01 |
| GHSR       | 0.070 | NA        | 3.975E-01 |
| KIAA1024   | 0.070 | 7.623E-01 | 5.803E-02 |
| UBE2S      | 0.070 | 7.084E-01 | 9.046E-02 |
| BARHL1     | 0.070 | 9.065E-01 | 5.529E-01 |
| CCNB2      | 0.070 | 6.923E-01 | 4.910E-01 |
| COG7       | 0.070 | 4.513E-01 | 1.969E-01 |
| ZC3H12B    | 0.070 | 8.007E-01 | 2.514E-01 |
| IRGC       | 0.070 | 9.296E-01 | 4.560E-01 |
| PPOX       | 0.070 | 7.203E-01 | 6.165E-02 |
| MAP4K5     | 0.070 | 4.327E-01 | 2.335E-01 |
| MIR4762    | 0.070 | NA        | 2.204E-01 |
| CAMSAP1    | 0.070 | 5.593E-01 | 6.144E-01 |
| TCEAL8     | 0.070 | 5.299E-01 | 9.502E-01 |
| KCTD13     | 0.070 | 6.310E-01 | 9.251E-01 |
| YPEL3      | 0.070 | 7.382E-01 | 9.186E-01 |
| DBX2       | 0.070 | 9.232E-01 | 1.504E-01 |
| CBX4       | 0.070 | 5.305E-01 | 4.647E-02 |
| AVPR2      | 0.070 | 8.306E-01 | 4.032E-02 |
| CEP350     | 0.070 | 5.155E-01 | 6.471E-01 |
| ZNF593     | 0.070 | 6.512E-01 | 7.534E-02 |
| PRKAR2B    | 0.070 | 8.318E-01 | 1.078E-01 |
| SIMC1      | 0.070 | 7.941E-01 | 3.207E-01 |
| TPSB2      | 0.070 | 8.660E-01 | 3.453E-02 |
| MAN1A2     | 0.070 | 4.931E-01 | 1.596E-01 |

|            |       |           |           |
|------------|-------|-----------|-----------|
| CTSZ       | 0.070 | 7.191E-01 | 5.789E-01 |
| RRAGB      | 0.069 | 5.749E-01 | 7.433E-02 |
| HRNR       | 0.069 | 8.675E-01 | 2.278E-01 |
| FNTA       | 0.069 | 5.607E-01 | 5.539E-01 |
| TMC2       | 0.069 | 8.598E-01 | 7.622E-01 |
| RNMT       | 0.069 | 5.030E-01 | 3.594E-02 |
| KIF26A     | 0.069 | 8.096E-01 | 9.550E-02 |
| AC006030.1 | 0.069 | 7.904E-01 | 6.199E-01 |
| DHX32      | 0.069 | 4.207E-01 | 4.121E-01 |
| RMDN3      | 0.069 | 3.991E-01 | 2.844E-01 |
| TMEM64     | 0.069 | 8.109E-01 | 2.577E-02 |
| PHYHD1     | 0.069 | 8.579E-01 | 2.335E-01 |
| MIR215     | 0.069 | 9.257E-01 | 1.840E-01 |
| IQCC       | 0.069 | 6.347E-01 | 6.878E-01 |
| TSPAN16    | 0.069 | 8.638E-01 | 3.593E-01 |
| FAM208B    | 0.069 | 5.490E-01 | 3.159E-01 |
| RGPD5      | 0.069 | 8.931E-01 | 8.963E-02 |
| SH3BP5L    | 0.069 | 4.027E-01 | 1.482E-01 |
| POLR2G     | 0.069 | 4.801E-01 | 5.315E-01 |
| TTLL1      | 0.069 | 6.263E-01 | 1.841E-02 |
| MIR3135B   | 0.069 | NA        | 8.453E-02 |
| VTI1A      | 0.069 | 3.345E-01 | 1.038E-01 |
| DDX60L     | 0.069 | 7.782E-01 | 5.725E-01 |
| MIR1208    | 0.069 | NA        | 1.179E-01 |
| RARRES3    | 0.069 | 8.688E-01 | 7.565E-01 |
| MOB1A      | 0.069 | 3.403E-01 | 3.137E-01 |
| C16orf91   | 0.069 | 5.272E-01 | 4.170E-01 |
| AKR1C4     | 0.069 | 9.128E-01 | 1.033E-01 |
| PPM1D      | 0.069 | 5.706E-01 | 5.913E-01 |
| KPNA2      | 0.069 | 6.763E-01 | 4.237E-01 |
| MYD88      | 0.069 | 5.710E-01 | 6.477E-01 |
| ZW10       | 0.069 | 4.600E-01 | 4.488E-01 |
| MIR3180-5  | 0.069 | NA        | 2.372E-01 |
| TRIM77     | 0.069 | NA        | 1.022E-01 |
| MIR196A2   | 0.069 | NA        | 2.917E-01 |
| MIR4423    | 0.069 | NA        | 5.570E-02 |
| FAM126A    | 0.068 | 7.921E-01 | 4.444E-01 |
| PGM1       | 0.068 | 7.329E-01 | 4.777E-02 |
| AFTPH      | 0.068 | 5.030E-01 | 2.259E-01 |
| ZNF324B    | 0.068 | 5.696E-01 | 3.788E-01 |
| CES4A      | 0.068 | 7.951E-01 | 1.146E-01 |
| ANKRD2     | 0.068 | 8.759E-01 | 9.696E-01 |
| STARD9     | 0.068 | 7.624E-01 | 2.771E-02 |
| TFPT       | 0.068 | 6.620E-01 | 9.592E-01 |
| C11orf42   | 0.068 | 8.512E-01 | 2.863E-01 |
| VAMP3      | 0.068 | 3.742E-01 | 4.215E-01 |
| ECT2       | 0.068 | 7.162E-01 | 1.565E-01 |
| MTCH1      | 0.068 | 4.106E-01 | 3.640E-01 |
| TCAF1      | 0.068 | 5.404E-01 | 1.352E-01 |
| KIF24      | 0.068 | 7.230E-01 | 7.165E-01 |



|            |       |           |           |
|------------|-------|-----------|-----------|
| SUCLG1     | 0.068 | 3.911E-01 | 2.864E-01 |
| PCDHGA1    | 0.068 | 8.146E-01 | 1.375E-02 |
| JAM3       | 0.068 | 8.083E-01 | 5.483E-01 |
| SRD5A3     | 0.068 | 7.067E-01 | 7.993E-02 |
| ARFGAP3    | 0.068 | 5.593E-01 | 1.023E-01 |
| RBM28      | 0.068 | 3.904E-01 | 2.289E-01 |
| ZNF592     | 0.068 | 3.959E-01 | 1.142E-01 |
| MTSS1      | 0.068 | 7.739E-01 | 9.129E-03 |
| ACTR1A     | 0.068 | 3.624E-01 | 5.781E-01 |
| ARMC3      | 0.068 | 9.212E-01 | 2.604E-01 |
| SNTB2      | 0.068 | 4.980E-01 | 4.853E-01 |
| MIR1299    | 0.068 | NA        | 2.164E-01 |
| KLK2       | 0.068 | 9.323E-01 | 3.103E-02 |
| AL662899.2 | 0.068 | 9.468E-01 | 2.357E-01 |
| NBPF10     | 0.068 | 6.807E-01 | 1.474E-01 |
| PRKCH      | 0.068 | 5.209E-01 | 5.693E-01 |
| GTF3A      | 0.068 | 5.749E-01 | 5.532E-01 |
| THAP1      | 0.068 | 4.581E-01 | 2.004E-01 |
| ZNF609     | 0.068 | 4.642E-01 | 4.640E-02 |
| TOP2B      | 0.068 | 7.233E-01 | 4.007E-01 |
| SNX4       | 0.068 | 4.931E-01 | 4.537E-02 |
| KIF15      | 0.068 | 7.325E-01 | 1.038E-01 |
| ZNF416     | 0.068 | 5.371E-01 | 6.021E-02 |
| SATB1      | 0.068 | 7.734E-01 | 5.497E-01 |
| C12orf66   | 0.068 | 5.568E-01 | 2.978E-01 |
| KCMF1      | 0.068 | 3.138E-01 | 4.160E-01 |
| CLDND2     | 0.068 | 7.941E-01 | 3.044E-02 |
| TCTEX1D4   | 0.067 | 8.294E-01 | 6.014E-01 |
| KCND1      | 0.067 | 7.502E-01 | 3.720E-01 |
| PPP1R18    | 0.067 | 7.418E-01 | 2.029E-02 |
| ENOX1      | 0.067 | 8.448E-01 | 2.796E-01 |
| PITPNM3    | 0.067 | 8.452E-01 | 9.865E-03 |
| PREPL      | 0.067 | 5.146E-01 | 4.463E-01 |
| ZNF17      | 0.067 | 5.032E-01 | 3.463E-01 |
| PDCD10     | 0.067 | 4.839E-01 | 3.256E-02 |
| PTPN14     | 0.067 | 6.603E-01 | 3.247E-02 |
| USHBP1     | 0.067 | 7.462E-01 | 1.550E-01 |
| SURF1      | 0.067 | 5.533E-01 | 7.203E-02 |
| HLA-DPA1   | 0.067 | 8.577E-01 | 5.781E-01 |
| MIR1183    | 0.067 | NA        | 6.021E-02 |
| CGB1       | 0.067 | NA        | 9.375E-01 |
| PDK3       | 0.067 | 6.874E-01 | 9.342E-01 |
| BTF3L4     | 0.067 | 3.489E-01 | 9.306E-01 |
| SAMD4A     | 0.067 | 7.855E-01 | 9.276E-01 |
| TPMT       | 0.067 | 5.891E-01 | 5.152E-02 |
| MAGEF1     | 0.067 | 5.729E-01 | 7.497E-01 |
| PLEKHA8    | 0.067 | 5.518E-01 | 2.258E-01 |
| ELOVL2     | 0.067 | 8.575E-01 | 1.044E-01 |
| SMURF2     | 0.067 | 5.381E-01 | 6.739E-01 |
| UQCRFS1    | 0.067 | 6.108E-01 | 2.254E-01 |

|          |       |           |           |
|----------|-------|-----------|-----------|
| ZNF331   | 0.067 | 7.909E-01 | 5.273E-02 |
| GNA11    | 0.067 | 4.375E-01 | 7.432E-02 |
| DCTPP1   | 0.067 | 6.079E-01 | 7.435E-02 |
| NLK      | 0.067 | 5.651E-01 | 4.435E-01 |
| SCAND1   | 0.067 | 6.764E-01 | 3.921E-01 |
| MAPK8IP1 | 0.067 | 8.068E-01 | 6.666E-02 |
| CDCA7L   | 0.067 | 8.676E-01 | 3.352E-02 |
| CHEK1    | 0.067 | 6.702E-01 | 2.532E-01 |
| CDK5     | 0.067 | 5.650E-01 | 1.842E-01 |
| SLC10A3  | 0.067 | 5.711E-01 | 2.098E-01 |
| GLT6D1   | 0.067 | NA        | 4.641E-02 |
| RNF40    | 0.066 | 4.913E-01 | 8.562E-01 |
| S100A4   | 0.066 | 8.691E-01 | 1.944E-01 |
| METTL18  | 0.066 | 6.278E-01 | 2.886E-02 |
| TMEM132E | 0.066 | 8.500E-01 | 6.585E-02 |
| MFSD1    | 0.066 | 5.732E-01 | 2.687E-01 |
| RAET1G   | 0.066 | 8.616E-01 | 5.625E-01 |
| PCDHB15  | 0.066 | 8.333E-01 | 2.077E-01 |
| AR       | 0.066 | 8.886E-01 | 4.170E-02 |
| SPICE1   | 0.066 | 5.838E-01 | 3.709E-02 |
| SIX5     | 0.066 | 6.513E-01 | 6.561E-02 |
| GIPC2    | 0.066 | 8.681E-01 | 5.005E-01 |
| ZNF843   | 0.066 | 7.829E-01 | 4.142E-02 |
| TPCN2    | 0.066 | 6.877E-01 | 6.610E-02 |
| CEP63    | 0.066 | 4.053E-01 | 4.114E-01 |
| ADPGK    | 0.066 | 3.757E-01 | 3.436E-01 |
| ADGRE3   | 0.066 | 8.781E-01 | 1.674E-01 |
| GIT1     | 0.066 | 5.568E-01 | 2.415E-01 |
| HBP1     | 0.066 | 5.696E-01 | 4.087E-02 |
| SSX4     | 0.066 | NA        | 3.839E-01 |
| MIR4452  | 0.066 | NA        | 7.104E-02 |
| DENND5A  | 0.066 | 6.387E-01 | 1.875E-01 |
| CSDE1    | 0.066 | 4.054E-01 | 5.917E-02 |
| PICALM   | 0.066 | 4.729E-01 | 1.857E-01 |
| TLE1     | 0.066 | 7.432E-01 | 1.659E-01 |
| AAGAB    | 0.066 | 3.894E-01 | 6.929E-02 |
| ABCB10   | 0.066 | 5.510E-01 | 6.747E-02 |
| UBE4A    | 0.066 | 5.419E-01 | 3.526E-01 |
| DDI2     | 0.066 | 6.157E-01 | 2.081E-01 |
| POU4F2   | 0.066 | NA        | 1.136E-01 |
| NAXE     | 0.066 | 5.401E-01 | 4.437E-01 |
| TMEM106C | 0.066 | 6.823E-01 | 6.921E-01 |
| H2AFV    | 0.066 | 4.937E-01 | 8.943E-02 |
| UBXN11   | 0.066 | 6.956E-01 | 4.782E-01 |
| IRF2BPL  | 0.066 | 5.986E-01 | 1.056E-02 |
| IMMP2L   | 0.066 | 6.903E-01 | 9.710E-02 |
| PRRX1    | 0.066 | 8.740E-01 | 3.784E-01 |
| TOR3A    | 0.065 | 4.862E-01 | 2.063E-01 |
| UCHL5    | 0.065 | 6.012E-01 | 1.079E-01 |
| FAM72C   | 0.065 | 7.941E-01 | 8.007E-02 |

|            |       |           |           |
|------------|-------|-----------|-----------|
| GPR89A     | 0.065 | 5.650E-01 | 9.704E-01 |
| TP53BP2    | 0.065 | 5.210E-01 | 9.704E-01 |
| ATXN3L     | 0.065 | NA        | 9.704E-01 |
| EAF1       | 0.065 | 5.749E-01 | 9.704E-01 |
| AL049650.1 | 0.065 | 7.832E-01 | 9.704E-01 |
| RRAS       | 0.065 | 7.715E-01 | 9.704E-01 |
| PROSER3    | 0.065 | 6.106E-01 | 1.538E-01 |
| C2CD3      | 0.065 | 4.967E-01 | 1.003E-01 |
| ASPA       | 0.065 | 8.831E-01 | 7.947E-01 |
| B4GALT5    | 0.065 | 6.628E-01 | 9.121E-01 |
| ADIPOR1    | 0.065 | 4.131E-01 | 9.089E-01 |
| AGPAT4     | 0.065 | 8.047E-01 | 9.058E-01 |
| LENG1      | 0.065 | 5.769E-01 | 8.960E-01 |
| TLL10      | 0.065 | 8.712E-01 | 5.444E-02 |
| SPECC1L    | 0.065 | 5.405E-01 | 7.979E-01 |
| UBE2V1     | 0.065 | 4.731E-01 | 7.159E-01 |
| ZNF575     | 0.065 | 6.030E-01 | 4.399E-01 |
| RAPGEF5    | 0.065 | 7.818E-01 | 2.195E-02 |
| TM9SF1     | 0.065 | 4.705E-01 | 6.921E-01 |
| RHBDD2     | 0.065 | 5.607E-01 | 1.561E-01 |
| ODF2       | 0.065 | 4.876E-01 | 7.347E-02 |
| UFC1       | 0.065 | 6.985E-01 | 2.850E-01 |
| STAU1      | 0.065 | 3.555E-01 | 5.241E-02 |
| ATRAID     | 0.065 | 4.663E-01 | 4.023E-01 |
| UBE2Q1     | 0.065 | 3.356E-01 | 1.410E-01 |
| USP31      | 0.065 | 6.958E-01 | 4.017E-02 |
| MAGED2     | 0.065 | 6.151E-01 | 3.443E-01 |
| CMTM7      | 0.065 | 7.643E-01 | 4.950E-01 |
| OAZ2       | 0.065 | 3.558E-01 | 1.128E-01 |
| FAM122C    | 0.065 | 6.128E-01 | 4.536E-01 |
| LRRC15     | 0.065 | 9.105E-01 | 3.064E-02 |
| ZNF681     | 0.065 | 8.092E-01 | 1.880E-01 |
| SEC11A     | 0.065 | 3.735E-01 | 1.433E-01 |
| APP        | 0.065 | 6.696E-01 | 1.416E-01 |
| BCL2L15    | 0.064 | 9.009E-01 | 1.503E-01 |
| CLCF1      | 0.064 | 8.345E-01 | 5.527E-02 |
| KCTD5      | 0.064 | 5.123E-01 | 1.783E-02 |
| PRSS22     | 0.064 | 8.270E-01 | 2.915E-01 |
| SMIM29     | 0.064 | 6.364E-01 | 1.167E-01 |
| SUPT6H     | 0.064 | 3.815E-01 | 2.569E-02 |
| HOOK1      | 0.064 | 7.528E-01 | 1.166E-01 |
| EDNRB      | 0.064 | 8.448E-01 | 3.284E-02 |
| MAPRE3     | 0.064 | 7.467E-01 | 4.609E-01 |
| RAMP2      | 0.064 | 7.638E-01 | 9.975E-02 |
| CDK2       | 0.064 | 6.598E-01 | 1.460E-01 |
| B3GALNT2   | 0.064 | 7.122E-01 | 2.793E-01 |
| TNFAIP1    | 0.064 | 4.934E-01 | 8.087E-01 |
| MIR1269B   | 0.064 | NA        | 3.213E-01 |
| MIR3648-1  | 0.064 | NA        | 3.140E-02 |
| SCP2D1     | 0.064 | NA        | 5.845E-01 |

|            |       |           |           |
|------------|-------|-----------|-----------|
| WDR26      | 0.064 | 3.920E-01 | 5.852E-01 |
| CAT        | 0.064 | 7.275E-01 | 5.002E-02 |
| SOS1       | 0.064 | 5.177E-01 | 3.271E-01 |
| MEX3D      | 0.064 | 6.336E-01 | 7.303E-02 |
| TCEAL1     | 0.064 | 6.894E-01 | 3.322E-02 |
| YARS       | 0.064 | 5.196E-01 | 3.850E-01 |
| UCK1       | 0.064 | 5.651E-01 | 6.088E-01 |
| MSANTD3    | 0.064 | 6.490E-01 | 1.433E-01 |
| ZHX3       | 0.064 | 6.211E-01 | 6.637E-02 |
| KAT6A      | 0.064 | 6.572E-01 | 7.228E-01 |
| COL20A1    | 0.064 | 9.095E-01 | 6.518E-01 |
| SIRPB2     | 0.063 | 8.544E-01 | 3.205E-02 |
| DDX25      | 0.063 | 8.886E-01 | 9.486E-01 |
| ALM2-AKAP  | 0.063 | 8.854E-01 | 9.395E-01 |
| DEFB133    | 0.063 | NA        | 9.172E-02 |
| CU639417.1 | 0.063 | NA        | 3.059E-01 |
| TNFAIP2    | 0.063 | 8.284E-01 | 9.967E-02 |
| AGTRAP     | 0.063 | 7.023E-01 | 1.282E-01 |
| ZNF460     | 0.063 | 7.363E-01 | 9.614E-02 |
| NYNRIN     | 0.063 | 8.189E-01 | 1.101E-01 |
| TANGO6     | 0.063 | 6.218E-01 | 1.550E-02 |
| IFNA5      | 0.063 | NA        | 6.001E-01 |
| B3GNT5     | 0.063 | 7.867E-01 | 1.629E-01 |
| TBC1D17    | 0.063 | 5.257E-01 | 1.066E-01 |
| BNIP1      | 0.063 | 8.799E-01 | 2.966E-01 |
| ZNF22      | 0.063 | 5.953E-01 | 4.261E-01 |
| TAS2R3     | 0.063 | 9.246E-01 | 6.780E-02 |
| DVL1       | 0.063 | 6.332E-01 | 5.290E-01 |
| ZNF148     | 0.063 | 4.525E-01 | 1.730E-01 |
| PPP1R2P3   | 0.063 | 8.470E-01 | 1.850E-01 |
| BMPR1A     | 0.063 | 4.931E-01 | 3.346E-02 |
| MIR3115    | 0.063 | NA        | 6.367E-02 |
| VEDD8-MDP  | 0.063 | 7.926E-01 | 3.976E-02 |
| NRAP       | 0.063 | 9.364E-01 | 7.616E-02 |
| SLC29A3    | 0.063 | 7.944E-01 | 1.305E-01 |
| NUP62      | 0.063 | 4.412E-01 | 4.516E-01 |
| ZNF652     | 0.063 | 5.322E-01 | 8.292E-02 |
| RHOA       | 0.063 | 4.577E-01 | 6.816E-01 |
| NIT1       | 0.063 | 6.632E-01 | 3.317E-01 |
| GORASP1    | 0.063 | 5.453E-01 | 1.293E-01 |
| MPHOSPH10  | 0.063 | 5.268E-01 | 1.571E-01 |
| SPDYE4     | 0.063 | 9.331E-01 | 2.501E-01 |
| SERINC1    | 0.063 | 5.559E-01 | 8.037E-02 |
| CEP104     | 0.063 | 3.456E-01 | 4.516E-01 |
| C4orf3     | 0.063 | 5.436E-01 | 2.317E-01 |
| SLC33A1    | 0.063 | 4.688E-01 | 1.328E-01 |
| ANP32E     | 0.063 | 6.784E-01 | 1.972E-01 |
| METTL23    | 0.063 | 4.416E-01 | 4.261E-02 |
| ZFP36L2    | 0.063 | 6.826E-01 | 6.256E-01 |
| PLPP1      | 0.063 | 7.921E-01 | 1.236E-01 |

|          |       |           |           |
|----------|-------|-----------|-----------|
| FAM199X  | 0.062 | 5.110E-01 | 7.795E-01 |
| CCNK     | 0.062 | 7.128E-01 | 6.076E-02 |
| RIMBP3   | 0.062 | 8.602E-01 | 5.367E-01 |
| B3GAT3   | 0.062 | 6.387E-01 | 4.114E-01 |
| LY6H     | 0.062 | 8.918E-01 | 1.515E-01 |
| MAOB     | 0.062 | 8.903E-01 | 5.958E-02 |
| ALKBH5   | 0.062 | 4.588E-01 | 3.402E-01 |
| TMEM222  | 0.062 | 4.847E-01 | 1.525E-01 |
| FAM104B  | 0.062 | 6.582E-01 | 1.841E-01 |
| PRDM2    | 0.062 | 5.307E-01 | 4.269E-01 |
| BIK      | 0.062 | 8.320E-01 | 6.821E-01 |
| HSFX1    | 0.062 | 8.999E-01 | 1.115E-01 |
| CAPN7    | 0.062 | 5.305E-01 | 6.805E-01 |
| RNF20    | 0.062 | 5.176E-01 | 6.487E-02 |
| EIF3M    | 0.062 | 6.246E-01 | 1.037E-01 |
| SSR2     | 0.062 | 5.348E-01 | 4.250E-01 |
| PLEKHA1  | 0.062 | 6.807E-01 | 6.558E-02 |
| GOLPH3   | 0.062 | 5.712E-01 | 9.142E-01 |
| MEIS3    | 0.062 | 8.481E-01 | 1.175E-01 |
| ASF1B    | 0.062 | 7.229E-01 | 4.864E-02 |
| MIR5687  | 0.062 | NA        | 7.867E-01 |
| GALNT3   | 0.062 | 7.789E-01 | 6.062E-02 |
| RNF6     | 0.062 | 5.711E-01 | 2.068E-01 |
| STK39    | 0.062 | 6.899E-01 | 1.613E-01 |
| MIR181C  | 0.062 | NA        | 8.472E-01 |
| TMEM87A  | 0.062 | 4.888E-01 | 6.683E-02 |
| HINFP    | 0.062 | 5.199E-01 | 4.539E-01 |
| SLC7A2   | 0.062 | 8.693E-01 | 1.008E-01 |
| PRPS2    | 0.062 | 6.559E-01 | 4.219E-02 |
| FAM182B  | 0.062 | 8.532E-01 | 1.828E-01 |
| MICALCL  | 0.062 | 8.329E-01 | 3.338E-02 |
| PPP4R3B  | 0.062 | 4.033E-01 | 2.676E-01 |
| RIPOR1   | 0.062 | 6.369E-01 | 7.891E-02 |
| MBNL2    | 0.062 | 6.333E-01 | 6.113E-01 |
| GDAP1    | 0.062 | 7.868E-01 | 6.473E-02 |
| ZNF705A  | 0.062 | 9.166E-01 | 4.426E-01 |
| C3orf67  | 0.062 | 8.752E-01 | 5.408E-02 |
| GPRASP2  | 0.061 | 7.280E-01 | 1.050E-01 |
| OR2A7    | 0.061 | 8.429E-01 | 1.284E-01 |
| RSPO3    | 0.061 | 9.056E-01 | 7.314E-01 |
| AGBL5    | 0.061 | 5.636E-01 | 3.422E-01 |
| ANXA7    | 0.061 | 5.299E-01 | 4.494E-01 |
| SLC25A44 | 0.061 | 4.422E-01 | 2.591E-01 |
| COMMD1   | 0.061 | 5.950E-01 | 1.495E-01 |
| SH3RF2   | 0.061 | 8.791E-01 | 6.233E-02 |
| ATP6V0E1 | 0.061 | 5.412E-01 | 1.570E-01 |
| RHOC     | 0.061 | 7.149E-01 | 1.566E-01 |
| MIR4764  | 0.061 | NA        | 1.152E-01 |
| MIR3140  | 0.061 | NA        | 3.740E-01 |
| OR5B17   | 0.061 | NA        | 7.756E-01 |

|            |       |           |           |
|------------|-------|-----------|-----------|
| CACUL1     | 0.061 | 4.577E-01 | 2.998E-02 |
| UACA       | 0.061 | 6.938E-01 | 1.137E-01 |
| RBL1       | 0.061 | 6.784E-01 | 5.180E-02 |
| ARMC8      | 0.061 | 3.063E-01 | 7.888E-02 |
| TAOK3      | 0.061 | 5.970E-01 | 3.646E-02 |
| FBXO28     | 0.061 | 4.829E-01 | 7.322E-01 |
| CDV3       | 0.061 | 5.852E-01 | 7.877E-01 |
| WNT2B      | 0.061 | 7.885E-01 | 3.882E-01 |
| USF2       | 0.061 | 5.054E-01 | 7.258E-02 |
| TUBG1      | 0.061 | 5.825E-01 | 4.320E-03 |
| AGFG1      | 0.061 | 6.777E-01 | 1.331E-01 |
| TRAPPC10   | 0.061 | 6.679E-01 | 3.384E-01 |
| SLC25A34   | 0.061 | 8.235E-01 | 8.062E-02 |
| ACOT9      | 0.061 | 7.426E-01 | 4.553E-01 |
| NETO2      | 0.061 | 8.374E-01 | 3.125E-01 |
| GES3L-AARS | 0.061 | 8.706E-01 | 3.951E-02 |
| CDC27      | 0.061 | 5.304E-01 | 5.240E-01 |
| MTHFD2     | 0.061 | 7.677E-01 | 1.275E-01 |
| HTR2C      | 0.061 | 9.132E-01 | 5.609E-01 |
| UBE2D4     | 0.061 | 5.966E-01 | 1.332E-01 |
| RFPL4A     | 0.061 | 9.593E-01 | 9.708E-01 |
| MIR378B    | 0.061 | NA        | 9.676E-01 |
| MAD2L2     | 0.061 | 7.347E-01 | 9.642E-01 |
| MFSD4B     | 0.061 | 6.567E-01 | 9.540E-01 |
| ZBTB42     | 0.061 | 7.214E-01 | 9.509E-01 |
| MEAF6      | 0.061 | 4.374E-01 | 9.506E-01 |
| RPS6KL1    | 0.061 | 8.421E-01 | 9.506E-01 |
| LPCAT3     | 0.061 | 7.574E-01 | 9.478E-01 |
| SALL3      | 0.061 | 9.475E-01 | 9.440E-01 |
| ZNF625     | 0.061 | 8.227E-01 | 5.269E-02 |
| EMD        | 0.060 | 5.455E-01 | 1.886E-01 |
| RFXAP      | 0.060 | 6.812E-01 | 6.450E-02 |
| TRAF4      | 0.060 | 7.354E-01 | 1.984E-01 |
| RAD51D     | 0.060 | 5.890E-01 | 5.054E-01 |
| ATL2       | 0.060 | 6.848E-01 | 7.711E-01 |
| DHRS4L2    | 0.060 | 7.029E-01 | 1.486E-02 |
| ARID4B     | 0.060 | 4.979E-01 | 7.472E-01 |
| XPOT       | 0.060 | 6.607E-01 | 4.892E-01 |
| SMARCA1    | 0.060 | 7.629E-01 | 5.457E-01 |
| ZNF319     | 0.060 | 6.145E-01 | 1.032E-01 |
| RNF111     | 0.060 | 5.568E-01 | 5.738E-02 |
| AC009163.4 | 0.060 | 9.273E-01 | 6.119E-01 |
| BCHE       | 0.060 | 9.085E-01 | 9.219E-01 |
| DLG1       | 0.060 | 5.978E-01 | 3.983E-01 |
| SFXN5      | 0.060 | 6.559E-01 | 4.585E-01 |
| TMEM263    | 0.060 | 6.155E-01 | 5.086E-01 |
| BCAS4      | 0.060 | 7.892E-01 | 7.569E-01 |
| SFXN3      | 0.060 | 7.138E-01 | 1.475E-01 |
| SKI        | 0.060 | 5.007E-01 | 1.797E-01 |
| ZNF720     | 0.060 | 6.011E-01 | 5.285E-01 |

|            |       |           |           |
|------------|-------|-----------|-----------|
| KMO        | 0.060 | 8.602E-01 | 1.251E-01 |
| MOB2       | 0.060 | 5.737E-01 | 9.129E-01 |
| SYTL5      | 0.060 | 9.080E-01 | 3.478E-02 |
| MTX1       | 0.060 | 5.271E-01 | 4.185E-02 |
| MED7-TICAM | 0.060 | 7.962E-01 | 3.286E-02 |
| S100A13    | 0.060 | 7.712E-01 | 1.662E-01 |
| MCTS1      | 0.060 | 5.453E-01 | 1.145E-01 |
| CDKN3      | 0.060 | 7.858E-01 | 1.002E-01 |
| PHC3       | 0.060 | 5.788E-01 | 1.077E-01 |
| AC008687.1 | 0.060 | 9.644E-01 | 1.634E-01 |
| ADAMTS14   | 0.060 | 8.661E-01 | 5.215E-01 |
| PPP2R5A    | 0.060 | 5.426E-01 | 1.095E-01 |
| THPO       | 0.060 | 8.771E-01 | 6.548E-01 |
| THADA      | 0.060 | 4.064E-01 | 2.795E-02 |
| METTL6     | 0.060 | 5.143E-01 | 2.361E-01 |
| TMEM55B    | 0.060 | 3.918E-01 | 7.142E-01 |
| RNPEP      | 0.060 | 5.596E-01 | 5.787E-02 |
| EIF2B3     | 0.060 | 5.773E-01 | 4.849E-01 |
| CNOT10     | 0.060 | 4.756E-01 | 4.952E-01 |
| TMEM17     | 0.060 | 7.074E-01 | 9.752E-02 |
| CCDC15     | 0.059 | 6.960E-01 | 2.556E-02 |
| CPVL       | 0.059 | 8.706E-01 | 2.000E-01 |
| RBKS       | 0.059 | 7.244E-01 | 4.381E-01 |
| HNRNPUL1   | 0.059 | 4.803E-01 | 9.477E-01 |
| GLTP       | 0.059 | 7.759E-01 | 9.408E-01 |
| MATN1      | 0.059 | 7.950E-01 | 9.288E-01 |
| AC073508.2 | 0.059 | 9.153E-01 | 9.257E-01 |
| CPNE2      | 0.059 | 7.148E-01 | 9.222E-01 |
| UBE4B      | 0.059 | 5.579E-01 | 1.238E-01 |
| WDR86      | 0.059 | 8.502E-01 | 2.635E-01 |
| FP236240.1 | 0.059 | NA        | 1.192E-01 |
| MICA       | 0.059 | 7.519E-01 | 7.208E-02 |
| TRIM29     | 0.059 | 8.502E-01 | 4.010E-01 |
| NBPF3      | 0.059 | 7.754E-01 | 1.101E-01 |
| CD99L2     | 0.059 | 7.618E-01 | 5.909E-01 |
| C1GALT1C11 | 0.059 | 8.500E-01 | 5.218E-01 |
| SRF        | 0.059 | 5.596E-01 | 4.760E-01 |
| AP4M1      | 0.059 | 5.990E-01 | 2.090E-01 |
| TPRG1L     | 0.059 | 5.730E-01 | 2.851E-01 |
| DPM3       | 0.059 | 7.686E-01 | 3.532E-02 |
| C11orf68   | 0.059 | 5.871E-01 | 5.252E-02 |
| PAQR5      | 0.059 | 8.818E-01 | 5.870E-01 |
| DNAJB4     | 0.059 | 7.451E-01 | 1.317E-01 |
| YWHAZ      | 0.059 | 7.117E-01 | 7.152E-01 |
| FKTN       | 0.059 | 5.932E-01 | 7.082E-02 |
| TPX2       | 0.059 | 7.812E-01 | 1.676E-01 |
| NXPE4      | 0.059 | 9.277E-01 | 7.329E-02 |
| ANKRD18A   | 0.059 | 9.003E-01 | 4.704E-01 |
| ZNF273     | 0.059 | 7.426E-01 | 1.517E-02 |
| ENY2       | 0.059 | 5.730E-01 | 7.834E-01 |

|            |       |           |           |
|------------|-------|-----------|-----------|
| ZNF610     | 0.059 | 8.427E-01 | 4.648E-01 |
| RNFT1      | 0.059 | 6.495E-01 | 1.207E-01 |
| CXorf23    | 0.059 | 6.456E-01 | 9.409E-02 |
| TCHP       | 0.059 | 5.693E-01 | 2.376E-01 |
| KLF2       | 0.059 | 8.386E-01 | 4.596E-01 |
| HYLS1      | 0.059 | 7.203E-01 | 8.338E-01 |
| RBFOX2     | 0.059 | 5.776E-01 | 2.377E-02 |
| DVL3       | 0.059 | 4.944E-01 | 1.753E-01 |
| FARS2      | 0.059 | 5.682E-01 | 1.598E-01 |
| CD46       | 0.059 | 7.078E-01 | 4.944E-02 |
| PPEF2      | 0.059 | 9.014E-01 | 4.054E-01 |
| MIR3171    | 0.059 | NA        | 7.105E-01 |
| FAM161B    | 0.058 | 6.904E-01 | 2.703E-01 |
| EPHX4      | 0.058 | 8.598E-01 | 9.418E-01 |
| NXT1       | 0.058 | 6.252E-01 | 3.582E-02 |
| C1orf127   | 0.058 | 8.822E-01 | 1.307E-01 |
| DDX1       | 0.058 | 4.497E-01 | 8.749E-01 |
| RALGPS1    | 0.058 | 8.083E-01 | 6.932E-02 |
| SYS1       | 0.058 | 5.928E-01 | 4.741E-01 |
| RAB22A     | 0.058 | 4.777E-01 | 8.152E-02 |
| MYBL2      | 0.058 | 8.249E-01 | 2.947E-01 |
| ARF3       | 0.058 | 4.629E-01 | 1.399E-01 |
| MS4A4A     | 0.058 | 8.822E-01 | 1.642E-01 |
| TP5J2-PTCD | 0.058 | 7.855E-01 | 1.218E-01 |
| MAPKAP1    | 0.058 | 4.709E-01 | 8.626E-02 |
| ZCCHC6     | 0.058 | 6.414E-01 | 6.389E-01 |
| ACADM      | 0.058 | 7.467E-01 | 3.898E-01 |
| MORC3      | 0.058 | 6.496E-01 | 4.047E-01 |
| MAPK8      | 0.058 | 5.426E-01 | 2.827E-01 |
| OR51B6     | 0.058 | NA        | 1.653E-01 |
| MIR3679    | 0.058 | NA        | 6.140E-01 |
| TBC1D10B   | 0.058 | 4.765E-01 | 1.508E-01 |
| ST3GAL3    | 0.058 | 6.946E-01 | 2.260E-01 |
| LASP1      | 0.058 | 6.387E-01 | 8.212E-02 |
| FBLN1      | 0.058 | 8.729E-01 | 5.490E-01 |
| NPR2       | 0.058 | 7.691E-01 | 1.034E-01 |
| PCDH12     | 0.058 | 7.953E-01 | 1.687E-01 |
| SAA1       | 0.058 | 9.282E-01 | 5.661E-02 |
| MOCOS      | 0.058 | 7.564E-01 | 1.186E-01 |
| LIG3       | 0.058 | 6.579E-01 | 7.268E-01 |
| TTLL5      | 0.058 | 5.155E-01 | 1.314E-01 |
| RBSN       | 0.058 | 5.701E-01 | 8.724E-01 |
| NDEL1      | 0.058 | 5.449E-01 | 6.987E-02 |
| HAUS2      | 0.058 | 5.715E-01 | 5.346E-01 |
| PLK3       | 0.058 | 7.636E-01 | 5.332E-01 |
| SLC2A12    | 0.058 | 8.999E-01 | 4.518E-02 |
| ZNF37A     | 0.058 | 5.841E-01 | 5.665E-01 |
| NEK7       | 0.058 | 7.294E-01 | 6.453E-01 |
| CSTF2      | 0.058 | 5.972E-01 | 6.380E-02 |
| ZNF449     | 0.058 | 6.264E-01 | 5.362E-01 |



|           |       |           |           |
|-----------|-------|-----------|-----------|
| JPT1      | 0.058 | 7.024E-01 | 9.722E-01 |
| TCEAL9    | 0.058 | 7.814E-01 | 9.722E-01 |
| DUSP14    | 0.058 | 7.441E-01 | 9.722E-01 |
| ITSN1     | 0.057 | 6.543E-01 | 2.721E-01 |
| ARHGAP12  | 0.057 | 7.071E-01 | 9.655E-01 |
| RAB7A     | 0.057 | 4.482E-01 | 9.653E-01 |
| TGM2      | 0.057 | 8.880E-01 | 9.622E-01 |
| MIR1302-8 | 0.057 | NA        | 9.620E-01 |
| BAK-RBAKD | 0.057 | 8.519E-01 | 9.557E-01 |
| ATP6V1E2  | 0.057 | 7.080E-01 | 2.935E-01 |
| SUFU      | 0.057 | 6.343E-01 | 1.614E-01 |
| MAN2A2    | 0.057 | 7.154E-01 | 2.205E-01 |
| NBPF1     | 0.057 | 7.029E-01 | 2.913E-01 |
| PILRA     | 0.057 | 8.658E-01 | 6.065E-01 |
| CTRB2     | 0.057 | 9.319E-01 | 3.458E-01 |
| GALNS     | 0.057 | 7.081E-01 | 4.405E-01 |
| PGBD2     | 0.057 | 6.616E-01 | 5.420E-01 |
| OR10D3    | 0.057 | NA        | 4.700E-01 |
| VPS37D    | 0.057 | 8.541E-01 | 3.216E-01 |
| LYPD1     | 0.057 | 8.887E-01 | 2.545E-01 |
| EBP       | 0.057 | 6.972E-01 | 4.406E-01 |
| 44081.000 | 0.057 | 4.789E-01 | 4.564E-01 |
| COLEC11   | 0.057 | 8.728E-01 | 1.757E-01 |
| TUBGCP3   | 0.057 | 6.286E-01 | 2.566E-01 |
| LRRC8E    | 0.057 | 8.146E-01 | 1.590E-01 |
| MYDGF     | 0.057 | 6.578E-01 | 2.558E-01 |
| PIBF1     | 0.057 | 6.116E-01 | 3.314E-01 |
| HIST1H2BG | 0.057 | 8.921E-01 | 1.349E-01 |
| SERHL2    | 0.057 | 7.299E-01 | 7.331E-01 |
| SEC23B    | 0.057 | 6.199E-01 | 8.307E-01 |
| MPHOSPH8  | 0.057 | 5.212E-01 | 5.220E-02 |
| FOXJ2     | 0.057 | 6.496E-01 | 9.653E-02 |
| NUDT4P1   | 0.057 | NA        | 1.182E-01 |
| DNAJC1    | 0.057 | 6.663E-01 | 5.188E-02 |
| UCHL1     | 0.057 | 9.137E-01 | 2.082E-01 |
| NYX       | 0.057 | 9.391E-01 | 4.374E-02 |
| NSDHL     | 0.057 | 6.387E-01 | 8.991E-02 |
| BCAS1     | 0.057 | 9.133E-01 | 1.078E-01 |
| TMEM179B  | 0.057 | 5.732E-01 | 3.512E-01 |
| HERC4     | 0.057 | 5.902E-01 | 1.359E-01 |
| TGFBR3    | 0.057 | 8.541E-01 | 8.686E-01 |
| ZNF585B   | 0.057 | 6.777E-01 | 3.426E-02 |
| YWHAG     | 0.057 | 6.030E-01 | 3.874E-02 |
| ALX4      | 0.057 | 9.208E-01 | 1.885E-01 |
| CNOT11    | 0.057 | 5.759E-01 | 3.749E-02 |
| SYNPO     | 0.057 | 8.067E-01 | 9.312E-02 |
| ARNT      | 0.057 | 5.865E-01 | 6.859E-01 |
| ANO7      | 0.056 | 8.046E-01 | 2.062E-01 |
| SAMD8     | 0.056 | 6.128E-01 | 1.417E-01 |
| MYRIP     | 0.056 | 8.997E-01 | 1.173E-01 |

|              |       |           |           |
|--------------|-------|-----------|-----------|
| PAOX         | 0.056 | 7.065E-01 | 6.247E-02 |
| GSK3B        | 0.056 | 4.889E-01 | 2.071E-01 |
| ZFP28        | 0.056 | 8.580E-01 | 5.737E-01 |
| PRIMPOL      | 0.056 | 5.311E-01 | 3.099E-01 |
| TAS2R41      | 0.056 | NA        | 4.007E-01 |
| SLC35A5      | 0.056 | 5.470E-01 | 2.440E-01 |
| TLCD2        | 0.056 | 7.699E-01 | 9.486E-01 |
| NXT2         | 0.056 | 6.769E-01 | 9.303E-01 |
| DUSP19       | 0.056 | 7.442E-01 | 5.538E-02 |
| DMRT2        | 0.056 | 9.296E-01 | 3.211E-01 |
| DOLPP1       | 0.056 | 6.278E-01 | 3.027E-01 |
| RAPH1        | 0.056 | 7.687E-01 | 5.745E-01 |
| CASZ1        | 0.056 | 7.852E-01 | 2.333E-01 |
| DHRS7B       | 0.056 | 7.247E-01 | 1.556E-01 |
| TTF1         | 0.056 | 5.467E-01 | 4.175E-01 |
| TAF15        | 0.056 | 5.251E-01 | 2.110E-01 |
| F8A1         | 0.056 | 7.869E-01 | 3.538E-01 |
| PDCD6        | 0.056 | 6.056E-01 | 1.997E-01 |
| MED10        | 0.056 | 6.751E-01 | 2.580E-01 |
| RGS7BP       | 0.056 | 9.092E-01 | 1.767E-01 |
| ANKRD40      | 0.056 | 4.801E-01 | 1.177E-01 |
| LAMP1        | 0.056 | 6.143E-01 | 7.492E-02 |
| HAAO         | 0.056 | 8.413E-01 | 9.427E-01 |
| PIGP         | 0.056 | 6.298E-01 | 1.426E-01 |
| BCL2         | 0.056 | 8.177E-01 | 2.217E-01 |
| MAEL         | 0.056 | 9.161E-01 | 1.205E-01 |
| VSX2         | 0.056 | 9.356E-01 | 5.837E-01 |
| CHCHD1       | 0.056 | 6.758E-01 | 5.092E-01 |
| POM121L2     | 0.056 | 9.249E-01 | 2.576E-01 |
| LSG1         | 0.056 | 5.344E-01 | 6.294E-02 |
| JUP          | 0.056 | 7.677E-01 | 2.612E-01 |
| PAPSS2       | 0.056 | 8.427E-01 | 5.904E-02 |
| FLAD1        | 0.056 | 6.081E-01 | 8.875E-01 |
| PSMD1        | 0.056 | 5.629E-01 | 3.700E-01 |
| POLR2M       | 0.056 | 5.102E-01 | 1.122E-01 |
| SCARB2       | 0.056 | 6.142E-01 | 1.146E-01 |
| PIK3C2B      | 0.056 | 8.118E-01 | 9.318E-02 |
| ZHX1-C8orf70 | 0.055 | 7.362E-01 | 1.462E-01 |
| KRTAP4-16    | 0.055 | NA        | 2.571E-01 |
| PSMG3        | 0.055 | 6.917E-01 | 7.841E-02 |
| IL3          | 0.055 | NA        | 8.799E-02 |
| MIR3158-1    | 0.055 | NA        | 1.436E-01 |
| C21orf62     | 0.055 | 8.849E-01 | 2.951E-02 |
| FES          | 0.055 | 7.971E-01 | 5.021E-02 |
| GNB2         | 0.055 | 5.559E-01 | 8.694E-02 |
| ZNF774       | 0.055 | 7.759E-01 | 1.252E-01 |
| PRSS55       | 0.055 | 9.420E-01 | 1.809E-01 |
| TAL1         | 0.055 | 8.463E-01 | 5.705E-02 |
| GLUL         | 0.055 | 7.826E-01 | 4.932E-02 |
| PCDH9        | 0.055 | 9.182E-01 | 1.085E-01 |

|            |       |           |           |
|------------|-------|-----------|-----------|
| TOX4       | 0.055 | 4.377E-01 | 3.872E-02 |
| ALDH16A1   | 0.055 | 6.840E-01 | 5.642E-01 |
| SELENOT    | 0.055 | 5.194E-01 | 1.267E-01 |
| KLHDC3     | 0.055 | 6.607E-01 | 4.491E-01 |
| SCAMP4     | 0.055 | 5.215E-01 | 2.583E-01 |
| SLC25A33   | 0.055 | 7.002E-01 | 2.086E-02 |
| SNX7       | 0.055 | 6.879E-01 | 9.730E-01 |
| C20orf24   | 0.055 | 6.419E-01 | 9.730E-01 |
| CEP68      | 0.055 | 5.944E-01 | 9.730E-01 |
| RAB3D      | 0.055 | 8.057E-01 | 9.708E-01 |
| USP22      | 0.055 | 7.180E-01 | 9.704E-01 |
| ACTN3      | 0.055 | 8.791E-01 | 9.674E-01 |
| MTOR       | 0.055 | 5.412E-01 | 3.906E-02 |
| LONRF3     | 0.055 | 8.528E-01 | 2.108E-02 |
| PLEKHG6    | 0.055 | 8.492E-01 | 4.958E-01 |
| LINC00998  | 0.055 | 6.409E-01 | 1.693E-01 |
| DCXR       | 0.055 | 7.671E-01 | 7.576E-01 |
| NBPF4      | 0.055 | 9.347E-01 | 5.059E-02 |
| SLC39A6    | 0.055 | 7.300E-01 | 4.479E-02 |
| C9orf78    | 0.055 | 5.521E-01 | 2.453E-01 |
| BCL9       | 0.055 | 7.271E-01 | 6.770E-02 |
| COASY      | 0.055 | 5.695E-01 | 8.633E-01 |
| SPR        | 0.055 | 7.300E-01 | 6.392E-01 |
| HEBP1      | 0.055 | 6.620E-01 | 3.358E-01 |
| CRISP3     | 0.055 | 9.358E-01 | 2.242E-01 |
| AVIL       | 0.055 | 8.074E-01 | 1.055E-01 |
| AC097637.1 | 0.054 | 9.452E-01 | 1.049E-01 |
| TEAD4      | 0.054 | 8.483E-01 | 6.304E-02 |
| LRRIQ3     | 0.054 | 8.113E-01 | 3.246E-01 |
| MIR4494    | 0.054 | NA        | 3.015E-01 |
| BICDL1     | 0.054 | 8.199E-01 | 6.269E-01 |
| ST3GAL2    | 0.054 | 7.488E-01 | 7.166E-02 |
| PHLDB1     | 0.054 | 7.638E-01 | 5.478E-01 |
| CERS2      | 0.054 | 6.513E-01 | 4.528E-01 |
| PALB2      | 0.054 | 6.632E-01 | 5.204E-02 |
| PAPSS1     | 0.054 | 6.128E-01 | 1.023E-01 |
| ALKBH3     | 0.054 | 6.978E-01 | 7.033E-01 |
| MIR4679-2  | 0.054 | NA        | 6.288E-01 |
| MIR4262    | 0.054 | NA        | 5.427E-01 |
| MIR4274    | 0.054 | NA        | 4.828E-01 |
| NXNL1      | 0.054 | NA        | 2.509E-01 |
| RRP36      | 0.054 | 6.410E-01 | 1.621E-01 |
| MIR3972    | 0.054 | 9.412E-01 | 2.362E-01 |
| POLR3C     | 0.054 | 5.778E-01 | 2.673E-01 |
| SYT17      | 0.054 | 8.453E-01 | 1.688E-01 |
| XPC        | 0.054 | 6.718E-01 | 4.346E-01 |
| C19orf54   | 0.054 | 6.884E-01 | 7.375E-02 |
| PCP4L1     | 0.054 | 9.243E-01 | 1.416E-01 |
| ACPT       | 0.054 | 8.645E-01 | 6.630E-02 |
| TTC32      | 0.054 | 7.203E-01 | 1.275E-01 |

|            |       |           |           |
|------------|-------|-----------|-----------|
| HSF5       | 0.054 | 8.983E-01 | 1.314E-01 |
| CADM4      | 0.054 | 8.278E-01 | 3.269E-02 |
| PHTF1      | 0.054 | 6.367E-01 | 3.131E-01 |
| ANKRD12    | 0.054 | 6.977E-01 | 6.787E-02 |
| ARPC5      | 0.054 | 5.425E-01 | 6.291E-01 |
| PKN3       | 0.054 | 7.847E-01 | 5.292E-01 |
| MYL4       | 0.054 | 8.415E-01 | 9.445E-01 |
| MLF1       | 0.054 | 8.146E-01 | 9.386E-01 |
| NCF4       | 0.054 | 8.580E-01 | 6.515E-01 |
| HDDC3      | 0.054 | 6.784E-01 | 1.948E-01 |
| DYM        | 0.054 | 5.847E-01 | 3.637E-01 |
| PRPF31     | 0.054 | 6.257E-01 | 1.715E-01 |
| NFKBIE     | 0.054 | 7.585E-01 | 2.346E-01 |
| FCRLA      | 0.054 | 9.159E-01 | 2.281E-01 |
| ZNF611     | 0.054 | 7.197E-01 | 8.031E-02 |
| SELENOI    | 0.054 | 6.759E-01 | 8.710E-02 |
| KMT2E      | 0.054 | 6.776E-01 | 5.396E-01 |
| PIGU       | 0.054 | 6.674E-01 | 4.402E-01 |
| RALB       | 0.053 | 6.748E-01 | 8.803E-01 |
| SPTBN4     | 0.053 | 8.759E-01 | 8.763E-02 |
| HIVEP3     | 0.053 | 8.397E-01 | 5.336E-01 |
| LYN        | 0.053 | 8.145E-01 | 5.769E-01 |
| FBXW2      | 0.053 | 5.970E-01 | 6.658E-01 |
| ARSB       | 0.053 | 7.048E-01 | 2.999E-02 |
| PPM1G      | 0.053 | 5.772E-01 | 2.408E-02 |
| LRRC57     | 0.053 | 5.229E-01 | 1.000E-01 |
| MIR6817    | 0.053 | NA        | 5.812E-02 |
| AL138826.1 | 0.053 | NA        | 3.873E-01 |
| MAP1-GIMA  | 0.053 | NA        | 4.261E-01 |
| LINC00633  | 0.053 | NA        | 6.503E-03 |
| TOR1A      | 0.053 | 5.596E-01 | 5.150E-02 |
| FKBP5      | 0.053 | 8.693E-01 | 1.566E-01 |
| S1PR2      | 0.053 | 7.433E-01 | 1.944E-01 |
| PNRC2      | 0.053 | 6.158E-01 | 4.907E-01 |
| MRPL49     | 0.053 | 5.511E-01 | 8.840E-01 |
| DUSP16     | 0.053 | 7.580E-01 | 8.958E-01 |
| TTL11      | 0.053 | 7.256E-01 | 1.570E-01 |
| ZNF669     | 0.053 | 6.814E-01 | 8.207E-02 |
| USB1       | 0.053 | 5.845E-01 | 6.796E-02 |
| TIAF1      | 0.053 | 7.630E-01 | 3.413E-01 |
| NDN        | 0.053 | 8.658E-01 | 5.922E-02 |
| ARPP19     | 0.053 | 5.510E-01 | 1.131E-01 |
| KLF4       | 0.053 | 8.512E-01 | 5.681E-01 |
| NPAT       | 0.053 | 6.650E-01 | 7.121E-03 |
| PLEKHO2    | 0.053 | 7.864E-01 | 8.086E-02 |
| PLAA       | 0.053 | 6.898E-01 | 1.600E-01 |
| MAPK14     | 0.053 | 5.613E-01 | 3.534E-01 |
| ESPL1      | 0.053 | 7.992E-01 | 4.320E-01 |
| ABCF2      | 0.053 | 5.629E-01 | 1.564E-01 |
| UBE2V2     | 0.053 | 6.058E-01 | 1.583E-01 |

|            |       |           |           |
|------------|-------|-----------|-----------|
| USP21      | 0.053 | 7.559E-01 | 5.847E-01 |
| RALA       | 0.053 | 6.571E-01 | 3.942E-01 |
| ENKUR      | 0.053 | 8.912E-01 | 4.630E-02 |
| NANP       | 0.053 | 6.387E-01 | 8.455E-02 |
| SPPL2A     | 0.053 | 5.411E-01 | 5.813E-02 |
| RAD21      | 0.053 | 6.927E-01 | 7.203E-01 |
| UBTD2      | 0.053 | 5.734E-01 | 2.839E-01 |
| ADAT1      | 0.053 | 6.019E-01 | 6.210E-01 |
| RTCA       | 0.053 | 4.659E-01 | 1.001E-01 |
| WBP2       | 0.053 | 5.233E-01 | 1.479E-01 |
| CETN1      | 0.053 | NA        | 9.737E-01 |
| MIR3147    | 0.053 | NA        | 9.737E-01 |
| SPATS1     | 0.053 | NA        | 9.737E-01 |
| AC037459.1 | 0.053 | 8.736E-01 | 9.737E-01 |
| SELENOF    | 0.052 | 4.778E-01 | 9.737E-01 |
| TXLNA      | 0.052 | 5.293E-01 | 9.737E-01 |
| C1QTNF9B   | 0.052 | 8.927E-01 | 9.737E-01 |
| NFKBIA     | 0.052 | 7.851E-01 | 9.737E-01 |
| RGMB       | 0.052 | 6.663E-01 | 9.737E-01 |
| GAS2       | 0.052 | 9.113E-01 | 9.737E-01 |
| PCDHB6     | 0.052 | 9.135E-01 | 9.737E-01 |
| PSMC4      | 0.052 | 6.566E-01 | 3.397E-01 |
| GLS2       | 0.052 | 8.668E-01 | 8.264E-02 |
| COQ2       | 0.052 | 7.193E-01 | 6.326E-02 |
| MAGEA12    | 0.052 | 9.626E-01 | 1.882E-01 |
| PDSS2      | 0.052 | 6.923E-01 | 5.637E-02 |
| KDSR       | 0.052 | 6.296E-01 | 1.208E-01 |
| MCM7       | 0.052 | 7.152E-01 | 3.015E-01 |
| ATP1A3     | 0.052 | 9.014E-01 | 3.178E-01 |
| PABPC1     | 0.052 | 8.429E-01 | 4.823E-01 |
| NCF2       | 0.052 | 8.829E-01 | 6.066E-01 |
| FCAR       | 0.052 | 9.060E-01 | 1.010E-01 |
| ANKRD46    | 0.052 | 8.147E-01 | 3.282E-01 |
| BBS4       | 0.052 | 6.467E-01 | 8.235E-02 |
| KDM4A      | 0.052 | 6.198E-01 | 2.661E-01 |
| TBC1D5     | 0.052 | 6.589E-01 | 7.740E-01 |
| IL36RN     | 0.052 | 9.356E-01 | 1.616E-01 |
| IRF2BP2    | 0.052 | 6.426E-01 | 3.261E-01 |
| WASHC2C    | 0.052 | 5.425E-01 | 3.167E-01 |
| CAMSAP3    | 0.052 | 8.274E-01 | 5.536E-02 |
| CDH5       | 0.052 | 8.235E-01 | 2.783E-02 |
| CATSPER4   | 0.052 | 9.031E-01 | 4.959E-01 |
| MIR4296    | 0.052 | NA        | 4.543E-01 |
| TSPAN5     | 0.052 | 8.514E-01 | 1.185E-01 |
| PEAK1      | 0.052 | 7.029E-01 | 1.454E-01 |
| PFKFB1     | 0.052 | 7.970E-01 | 1.863E-01 |
| SEC62      | 0.052 | 5.436E-01 | 3.275E-01 |
| DNASE2     | 0.052 | 6.497E-01 | 1.886E-01 |
| HTATIP2    | 0.052 | 7.390E-01 | 1.285E-01 |
| PIPOX      | 0.052 | 8.682E-01 | 1.110E-01 |

|            |       |           |           |
|------------|-------|-----------|-----------|
| CTNND1     | 0.052 | 6.999E-01 | 4.880E-01 |
| BCORL1     | 0.052 | 7.326E-01 | 5.278E-01 |
| PDE3A      | 0.052 | 8.504E-01 | 1.744E-01 |
| FNTB       | 0.052 | 5.621E-01 | 3.968E-01 |
| APITD1-COR | 0.051 | 7.729E-01 | 7.000E-01 |
| FANCG      | 0.051 | 7.347E-01 | 1.875E-01 |
| PLD1       | 0.051 | 8.237E-01 | 6.446E-01 |
| TIFA       | 0.051 | 7.046E-01 | 8.037E-02 |
| ORMDL3     | 0.051 | 7.722E-01 | 1.240E-01 |
| MED24      | 0.051 | 6.365E-01 | 5.798E-01 |
| MIR1285-2  | 0.051 | NA        | 4.191E-02 |
| OR4M1      | 0.051 | NA        | 9.424E-01 |
| MIR548F2   | 0.051 | NA        | 2.311E-01 |
| ACSL4      | 0.051 | 8.107E-01 | 1.335E-01 |
| NEK4       | 0.051 | 7.198E-01 | 1.526E-01 |
| WNT3A      | 0.051 | 9.265E-01 | 1.479E-01 |
| ZNF507     | 0.051 | 6.805E-01 | 3.644E-01 |
| ADIPOR2    | 0.051 | 6.603E-01 | 1.544E-01 |
| KDM1B      | 0.051 | 7.605E-01 | 2.598E-01 |
| MIR563     | 0.051 | NA        | 6.290E-01 |
| SF3B2      | 0.051 | 4.584E-01 | 1.153E-01 |
| IDH3A      | 0.051 | 6.884E-01 | 2.528E-01 |
| TMEM14C    | 0.051 | 6.634E-01 | 1.690E-01 |
| TYW1       | 0.051 | 5.126E-01 | 9.549E-01 |
| MDH1       | 0.051 | 5.156E-01 | 9.490E-01 |
| MOSPD1     | 0.051 | 7.624E-01 | 9.490E-01 |
| LIG1       | 0.051 | 6.620E-01 | 9.432E-01 |
| GON4L      | 0.051 | 6.000E-01 | 1.300E-01 |
| ZNF773     | 0.051 | 7.598E-01 | 6.137E-01 |
| ACP1       | 0.051 | 5.859E-01 | 9.438E-01 |
| SUSD6      | 0.051 | 7.599E-01 | 1.032E-01 |
| MIR3907    | 0.051 | NA        | 3.017E-01 |
| TM2D3      | 0.051 | 5.303E-01 | 1.864E-01 |
| VWDE       | 0.051 | 9.237E-01 | 2.373E-01 |
| FAM89A     | 0.051 | 8.198E-01 | 1.753E-01 |
| PIK3R4     | 0.051 | 5.735E-01 | 4.021E-01 |
| SLC7A6OS   | 0.051 | 6.632E-01 | 3.564E-01 |
| AC009690.3 | 0.051 | NA        | 1.946E-01 |
| MIR1303    | 0.051 | NA        | 8.999E-02 |
| TRPM3      | 0.051 | 9.105E-01 | 6.790E-02 |
| XYLT1      | 0.051 | 8.759E-01 | 8.067E-02 |
| RGS19      | 0.051 | 7.319E-01 | 7.417E-02 |
| PTPA       | 0.051 | 5.985E-01 | 2.130E-01 |
| ING4       | 0.050 | 6.847E-01 | 1.384E-01 |
| STARD8     | 0.050 | 8.354E-01 | 2.803E-01 |
| ZNF572     | 0.050 | 8.317E-01 | 7.463E-01 |
| METTL2B    | 0.050 | 5.924E-01 | 1.785E-01 |
| PTEN       | 0.050 | 6.352E-01 | 1.382E-01 |
| DCAF10     | 0.050 | 6.364E-01 | 6.408E-01 |
| ZNF530     | 0.050 | 7.354E-01 | 3.166E-01 |

|          |       |           |           |
|----------|-------|-----------|-----------|
| KIF16B   | 0.050 | 7.396E-01 | 1.681E-01 |
| CHIC1    | 0.050 | 7.257E-01 | 3.601E-01 |
| SLC25A5  | 0.050 | 7.082E-01 | 2.426E-01 |
| ZNF75A   | 0.050 | 7.690E-01 | 1.582E-01 |
| NRG3     | 0.050 | 9.359E-01 | 9.100E-01 |
| MCMBP    | 0.050 | 5.749E-01 | 9.129E-01 |
| LMBRD2   | 0.050 | 7.446E-01 | 1.032E-01 |
| RNF2     | 0.050 | 6.430E-01 | 8.357E-02 |
| KCNK17   | 0.050 | 8.903E-01 | 1.543E-01 |
| SSRP1    | 0.050 | 6.273E-01 | 1.390E-01 |
| CELSR3   | 0.050 | 8.736E-01 | 1.376E-02 |
| PCDHB16  | 0.050 | 8.772E-01 | 3.908E-01 |
| APEX2    | 0.050 | 6.440E-01 | 1.097E-01 |
| MCM3     | 0.050 | 7.364E-01 | 7.778E-02 |
| TULP1    | 0.050 | 8.425E-01 | 5.948E-01 |
| LEMD2    | 0.050 | 5.596E-01 | 5.757E-01 |
| DRD1     | 0.050 | 9.292E-01 | 1.530E-01 |
| CANX     | 0.050 | 5.765E-01 | 6.392E-02 |
| CENPB    | 0.050 | 6.771E-01 | 6.748E-02 |
| NSMCE2   | 0.050 | 6.142E-01 | 7.847E-02 |
| NID2     | 0.050 | 8.829E-01 | 3.240E-02 |
| PEX10    | 0.050 | 5.729E-01 | 5.504E-01 |
| ACBD5    | 0.050 | 7.481E-01 | 7.556E-02 |
| PAK2     | 0.050 | 5.436E-01 | 7.433E-01 |
| TMED1    | 0.050 | 6.713E-01 | 1.147E-01 |
| MYL12B   | 0.050 | 6.603E-01 | 1.177E-01 |
| RPRD2    | 0.049 | 6.946E-01 | 7.323E-01 |
| ZFAND3   | 0.049 | 5.213E-01 | 1.489E-01 |
| UHRF2    | 0.049 | 7.295E-01 | 2.173E-01 |
| NADK     | 0.049 | 5.522E-01 | 4.050E-02 |
| ARL2BP   | 0.049 | 7.684E-01 | 1.596E-01 |
| CYP7B1   | 0.049 | 8.839E-01 | 2.731E-01 |
| RALGPS2  | 0.049 | 7.794E-01 | 1.126E-01 |
| DAPK3    | 0.049 | 6.953E-01 | 1.513E-01 |
| FLNB     | 0.049 | 8.046E-01 | 6.021E-02 |
| CTBP2    | 0.049 | 7.373E-01 | 2.194E-01 |
| GSTK1    | 0.049 | 7.311E-01 | 5.248E-01 |
| ZBTB7B   | 0.049 | 7.480E-01 | 1.626E-01 |
| VPS53    | 0.049 | 5.583E-01 | 8.723E-02 |
| C19orf12 | 0.049 | 7.533E-01 | 4.534E-01 |
| MIR3619  | 0.049 | NA        | 9.198E-02 |
| RND2     | 0.049 | 8.932E-01 | 1.193E-01 |
| VPS4B    | 0.049 | 6.732E-01 | 1.047E-01 |
| STARD6   | 0.049 | 9.032E-01 | 7.000E-02 |
| PRR11    | 0.049 | 8.198E-01 | 1.613E-01 |
| REEP4    | 0.049 | 7.559E-01 | 3.648E-01 |
| TRAPPC3  | 0.049 | 5.048E-01 | 1.243E-01 |
| NTAN1    | 0.049 | 7.722E-01 | 1.134E-01 |
| GORAB    | 0.049 | 7.084E-01 | 1.520E-01 |
| NKD1     | 0.049 | 8.889E-01 | 2.467E-01 |

|           |       |           |           |
|-----------|-------|-----------|-----------|
| TIMM23    | 0.049 | 6.185E-01 | 4.421E-01 |
| NUDC      | 0.049 | 6.490E-01 | 7.145E-01 |
| EXOC6     | 0.049 | 6.826E-01 | 8.754E-01 |
| ZBTB41    | 0.049 | 7.046E-01 | 1.336E-01 |
| GTF3C1    | 0.049 | 5.480E-01 | 1.310E-01 |
| USP9X     | 0.049 | 6.293E-01 | 8.160E-01 |
| LCTL      | 0.049 | 8.242E-01 | 8.671E-02 |
| MTDH      | 0.049 | 7.244E-01 | 6.406E-01 |
| LINC01125 | 0.049 | 8.279E-01 | 1.228E-01 |
| MIR4796   | 0.049 | NA        | 6.871E-01 |
| MIR8073   | 0.049 | NA        | 2.960E-01 |
| MIR8053   | 0.049 | NA        | 4.689E-02 |
| OR10G7    | 0.049 | NA        | 2.874E-01 |
| KRTAP6-1  | 0.049 | NA        | 4.076E-02 |
| MIR138-2  | 0.049 | NA        | 7.637E-02 |
| TADA3     | 0.049 | 6.886E-01 | 3.215E-01 |
| TMEM230   | 0.049 | 5.996E-01 | 1.306E-01 |
| GPR45     | 0.049 | 9.173E-01 | 2.073E-01 |
| NKAP      | 0.049 | 5.050E-01 | 3.020E-01 |
| DLL3      | 0.049 | 9.246E-01 | 9.593E-01 |
| ZNF532    | 0.048 | 8.072E-01 | 9.569E-01 |
| SLC35A3   | 0.048 | 7.161E-01 | 9.566E-01 |
| NAGLU     | 0.048 | 7.214E-01 | 3.508E-01 |
| ZNF354C   | 0.048 | 8.671E-01 | 3.977E-01 |
| BOD1      | 0.048 | 5.826E-01 | 4.393E-01 |
| CENPP     | 0.048 | 7.513E-01 | 2.920E-01 |
| KCNA1     | 0.048 | 9.525E-01 | 6.793E-01 |
| NBPF19    | 0.048 | 7.662E-01 | 5.422E-01 |
| ITIH3     | 0.048 | 8.986E-01 | 5.270E-01 |
| RALY      | 0.048 | 6.513E-01 | 5.894E-01 |
| G6PC3     | 0.048 | 7.080E-01 | 1.523E-01 |
| BCKDK     | 0.048 | 5.846E-01 | 3.294E-01 |
| TRIP4     | 0.048 | 4.752E-01 | 2.304E-01 |
| ATG101    | 0.048 | 6.938E-01 | 8.782E-02 |
| OPA1      | 0.048 | 6.122E-01 | 7.451E-02 |
| TMEM119   | 0.048 | 8.934E-01 | 1.243E-01 |
| SCNN1D    | 0.048 | 8.667E-01 | 2.115E-01 |
| SIL1      | 0.048 | 7.442E-01 | 7.813E-02 |
| CHMP5     | 0.048 | 6.748E-01 | 1.214E-01 |
| SRPRB     | 0.048 | 6.544E-01 | 1.694E-01 |
| BRWD1     | 0.048 | 6.894E-01 | 3.352E-01 |
| LSM1      | 0.048 | 7.426E-01 | 7.036E-01 |
| BHLHE23   | 0.048 | NA        | 1.766E-01 |
| KCNK1     | 0.048 | 8.598E-01 | 6.827E-01 |
| DHRS11    | 0.048 | 8.217E-01 | 2.707E-01 |
| UBA2      | 0.048 | 6.620E-01 | 7.706E-02 |
| SPEN      | 0.048 | 6.529E-01 | 3.975E-01 |
| ACTRT1    | 0.048 | NA        | 7.341E-02 |
| PKD1      | 0.048 | 7.325E-01 | 3.169E-01 |
| BCL11A    | 0.048 | 9.093E-01 | 5.450E-01 |



|            |       |           |           |
|------------|-------|-----------|-----------|
| SMAD4      | 0.048 | 6.188E-01 | 4.136E-01 |
| AZI2       | 0.048 | 6.860E-01 | 2.802E-01 |
| FCGR1A     | 0.048 | 9.092E-01 | 7.446E-01 |
| SH3BP4     | 0.048 | 8.292E-01 | 4.884E-01 |
| TMSB4X     | 0.048 | 7.889E-01 | 1.077E-01 |
| KIN        | 0.048 | 6.897E-01 | 4.655E-01 |
| UBAC1      | 0.048 | 7.254E-01 | 8.262E-01 |
| C7orf49    | 0.048 | 6.321E-01 | 5.756E-02 |
| STAT3      | 0.048 | 7.024E-01 | 3.165E-01 |
| PTPRN      | 0.048 | 9.248E-01 | 6.666E-01 |
| C2orf42    | 0.047 | 5.127E-01 | 5.594E-01 |
| BAG4       | 0.047 | 7.851E-01 | 1.396E-01 |
| LBX2       | 0.047 | 8.385E-01 | 3.300E-01 |
| TAX1BP1    | 0.047 | 6.321E-01 | 5.892E-02 |
| AC114296.1 | 0.047 | 9.344E-01 | 5.604E-01 |
| MERTK      | 0.047 | 8.506E-01 | 1.620E-01 |
| C15orf39   | 0.047 | 6.816E-01 | 4.794E-01 |
| PLCB1      | 0.047 | 8.181E-01 | 4.750E-01 |
| POMZP3     | 0.047 | 7.902E-01 | 2.460E-01 |
| XKRX       | 0.047 | 8.756E-01 | 1.229E-01 |
| TMF1       | 0.047 | 7.172E-01 | 2.484E-01 |
| COX17      | 0.047 | 7.191E-01 | 1.695E-01 |
| EPG5       | 0.047 | 6.589E-01 | 2.689E-01 |
| ZNF468     | 0.047 | 7.867E-01 | 9.264E-01 |
| CHUK       | 0.047 | 6.335E-01 | 7.342E-01 |
| BRCA1      | 0.047 | 7.802E-01 | 4.846E-01 |
| DNAH3      | 0.047 | 8.822E-01 | 3.374E-01 |
| SYPL1      | 0.047 | 7.446E-01 | 9.288E-01 |
| MYCNOS     | 0.047 | 9.456E-01 | 9.263E-01 |
| GNGT1      | 0.047 | 9.019E-01 | 2.419E-01 |
| ANKRD13C   | 0.047 | 5.315E-01 | 2.481E-01 |
| ICE1       | 0.047 | 7.354E-01 | 3.713E-01 |
| VAPB       | 0.047 | 6.439E-01 | 7.939E-02 |
| ZDHHC1     | 0.047 | 8.153E-01 | 1.634E-01 |
| RPA1       | 0.047 | 6.877E-01 | 5.282E-01 |
| C4orf19    | 0.047 | 9.033E-01 | 4.503E-01 |
| C11orf65   | 0.047 | 7.971E-01 | 8.788E-02 |
| NCAPH      | 0.047 | 8.172E-01 | 4.888E-01 |
| RASSF5     | 0.047 | 8.167E-01 | 4.085E-01 |
| SERTAD2    | 0.047 | 7.441E-01 | 1.867E-01 |
| UMAD1      | 0.047 | 6.904E-01 | 2.416E-01 |
| EXOC8      | 0.047 | 6.382E-01 | 1.510E-01 |
| SHB        | 0.047 | 7.970E-01 | 2.277E-01 |
| MAPK9      | 0.047 | 5.648E-01 | 1.925E-01 |
| ZNF132     | 0.047 | 8.232E-01 | 2.536E-01 |
| ADGRF4     | 0.047 | 8.772E-01 | 1.199E-01 |
| TIGD2      | 0.047 | 7.873E-01 | 2.333E-01 |
| LRP10      | 0.047 | 7.321E-01 | 6.082E-01 |
| GCLM       | 0.047 | 8.765E-01 | 8.124E-02 |
| MAP10      | 0.047 | 8.631E-01 | 8.176E-02 |

|            |       |           |           |
|------------|-------|-----------|-----------|
| DNALI1     | 0.046 | 9.147E-01 | 5.736E-01 |
| NHLRC1     | 0.046 | 8.495E-01 | 1.240E-01 |
| WDR5B      | 0.046 | 7.010E-01 | 5.612E-01 |
| ZNF584     | 0.046 | 6.927E-01 | 2.567E-02 |
| ARID1A     | 0.046 | 6.937E-01 | 7.291E-01 |
| NUP214     | 0.046 | 5.964E-01 | 5.096E-02 |
| RPS6KC1    | 0.046 | 6.398E-01 | 4.701E-01 |
| ANKRD26    | 0.046 | 7.322E-01 | 1.779E-01 |
| AC104109.3 | 0.046 | 9.027E-01 | 3.071E-01 |
| ZFP1       | 0.046 | 6.853E-01 | 6.672E-01 |
| PEBP1      | 0.046 | 8.118E-01 | 2.266E-01 |
| SIRT4      | 0.046 | 8.386E-01 | 3.255E-01 |
| CCL16      | 0.046 | 9.274E-01 | 1.448E-01 |
| 43895.000  | 0.046 | 6.036E-01 | 3.677E-01 |
| DOCK9      | 0.046 | 7.789E-01 | 4.897E-01 |
| EPHB4      | 0.046 | 8.007E-01 | 1.211E-01 |
| PCDHA7     | 0.046 | 9.212E-01 | 2.599E-01 |
| APBB2      | 0.046 | 7.744E-01 | 7.656E-01 |
| COLGALT1   | 0.046 | 7.479E-01 | 2.090E-01 |
| DNAJC12    | 0.046 | 8.878E-01 | 5.381E-01 |
| OR8A1      | 0.046 | 9.698E-01 | 2.787E-01 |
| TTC28      | 0.046 | 8.446E-01 | 1.651E-01 |
| MIR8068    | 0.046 | NA        | 1.941E-01 |
| MIR6799    | 0.046 | NA        | 8.507E-02 |
| MIR6731    | 0.046 | NA        | 2.003E-01 |
| OR2S2      | 0.046 | NA        | 4.043E-01 |
| ESF1       | 0.046 | 7.293E-01 | 9.755E-01 |
| KIAA1217   | 0.046 | 7.436E-01 | 9.698E-01 |
| RPS27      | 0.046 | 7.460E-01 | 9.697E-01 |
| DENND1A    | 0.046 | 7.347E-01 | 9.694E-01 |
| ATP2C1     | 0.046 | 6.422E-01 | 6.173E-02 |
| TMEM231    | 0.046 | 7.805E-01 | 4.662E-01 |
| USP37      | 0.046 | 8.421E-01 | 2.248E-01 |
| AC233723.1 | 0.046 | 8.725E-01 | 1.267E-01 |
| MIR30C1    | 0.046 | NA        | 3.464E-01 |
| ARR3       | 0.046 | 8.315E-01 | 2.427E-01 |
| MCCC1      | 0.046 | 8.058E-01 | 6.247E-02 |
| DCAF12     | 0.046 | 6.987E-01 | 1.613E-01 |
| SMC6       | 0.046 | 7.192E-01 | 9.383E-01 |
| EIF2B4     | 0.046 | 5.696E-01 | 2.041E-01 |
| KCNH3      | 0.046 | 8.998E-01 | 5.251E-02 |
| ARHGEF11   | 0.045 | 6.840E-01 | 1.157E-01 |
| TRIM4      | 0.045 | 6.841E-01 | 2.371E-01 |
| C11orf94   | 0.045 | 8.854E-01 | 7.660E-02 |
| UBN1       | 0.045 | 6.609E-01 | 8.475E-01 |
| MCM10      | 0.045 | 8.452E-01 | 1.763E-01 |
| MIR599     | 0.045 | NA        | 2.839E-01 |
| TGIF2LY    | 0.045 | NA        | 1.788E-01 |
| SHOC2      | 0.045 | 5.744E-01 | 3.456E-01 |
| ORC5       | 0.045 | 6.128E-01 | 1.369E-01 |

|           |       |           |           |
|-----------|-------|-----------|-----------|
| MAP4K2    | 0.045 | 7.333E-01 | 1.118E-01 |
| SLC7A6    | 0.045 | 8.183E-01 | 1.730E-01 |
| BCL2L12   | 0.045 | 7.558E-01 | 6.834E-01 |
| CDK5RAP2  | 0.045 | 7.809E-01 | 2.978E-01 |
| KRTAP9-6  | 0.045 | NA        | 3.538E-01 |
| DHRS9     | 0.045 | 9.397E-01 | 7.901E-02 |
| GPR142    | 0.045 | 9.375E-01 | 8.242E-02 |
| SHISA4    | 0.045 | 8.283E-01 | 3.348E-01 |
| APOBEC3F  | 0.045 | 8.172E-01 | 2.133E-01 |
| ADGRE5    | 0.045 | 8.397E-01 | 2.067E-01 |
| ZNF212    | 0.045 | 5.996E-01 | 2.679E-01 |
| MDC1      | 0.045 | 7.510E-01 | 6.495E-02 |
| ZNF362    | 0.045 | 7.085E-01 | 5.595E-01 |
| PLPP6     | 0.045 | 7.383E-01 | 7.938E-01 |
| CDHR3     | 0.045 | 8.466E-01 | 1.694E-01 |
| TMEM160   | 0.045 | 8.204E-01 | 6.625E-02 |
| MIR4786   | 0.045 | 9.107E-01 | 6.427E-02 |
| ZNF780A   | 0.045 | 7.692E-01 | 9.862E-02 |
| TUBB      | 0.045 | 7.288E-01 | 6.115E-01 |
| TPM4      | 0.045 | 7.656E-01 | 5.955E-01 |
| MFSD13A   | 0.045 | 7.953E-01 | 2.694E-01 |
| CTDSPL2   | 0.045 | 6.582E-01 | 1.693E-01 |
| KLK3      | 0.045 | 9.729E-01 | 3.741E-01 |
| STOM      | 0.045 | 8.720E-01 | 1.250E-01 |
| PRKAG1    | 0.045 | 5.012E-01 | 5.252E-01 |
| NUP205    | 0.045 | 7.298E-01 | 9.497E-01 |
| TICAM1    | 0.045 | 7.510E-01 | 1.910E-01 |
| MIR3609   | 0.045 | 9.380E-01 | 9.472E-01 |
| UBASH3B   | 0.045 | 8.750E-01 | 9.417E-01 |
| MED14     | 0.044 | 6.967E-01 | 9.392E-01 |
| CDC42BPA  | 0.044 | 8.055E-01 | 4.691E-01 |
| ANG       | 0.044 | 8.621E-01 | 8.457E-02 |
| ST5       | 0.044 | 8.446E-01 | 2.397E-01 |
| LSM11     | 0.044 | 7.412E-01 | 8.789E-01 |
| 43893.000 | 0.044 | 8.566E-01 | 7.739E-01 |
| NENF      | 0.044 | 7.789E-01 | 6.504E-01 |
| NUDT7     | 0.044 | 8.815E-01 | 1.592E-01 |
| BICD2     | 0.044 | 8.084E-01 | 2.169E-01 |
| MIR3151   | 0.044 | NA        | 2.537E-01 |
| FOXP4     | 0.044 | 7.271E-01 | 6.976E-01 |
| TMEM269   | 0.044 | 9.075E-01 | 1.585E-01 |
| SEMG2     | 0.044 | 9.623E-01 | 4.706E-01 |
| CCDC30    | 0.044 | 8.361E-01 | 6.764E-01 |
| DNAJC9    | 0.044 | 7.368E-01 | 2.830E-01 |
| TRIM62    | 0.044 | 7.848E-01 | 6.298E-01 |
| FPGT      | 0.044 | 6.802E-01 | 6.064E-02 |
| LENEP     | 0.044 | 9.180E-01 | 2.795E-01 |
| POU5F2    | 0.044 | 8.937E-01 | 4.543E-01 |
| DNAJC11   | 0.044 | 6.612E-01 | 9.463E-02 |
| ANKMY2    | 0.044 | 7.212E-01 | 4.323E-01 |

|          |       |           |           |
|----------|-------|-----------|-----------|
| COX7A2L  | 0.044 | 6.030E-01 | 4.832E-01 |
| CTAGE8   | 0.044 | 9.080E-01 | 1.266E-01 |
| MAP3K6   | 0.044 | 8.023E-01 | 7.241E-01 |
| MIR3134  | 0.044 | NA        | 7.200E-01 |
| PLEKHA5  | 0.044 | 7.794E-01 | 2.037E-01 |
| CAMSAP2  | 0.044 | 7.193E-01 | 2.332E-01 |
| SYN1     | 0.044 | 8.983E-01 | 1.306E-01 |
| STMN2    | 0.044 | 9.452E-01 | 3.738E-01 |
| MCM4     | 0.044 | 7.934E-01 | 1.222E-01 |
| EIF4E3   | 0.044 | 8.195E-01 | 8.983E-01 |
| TMUB2    | 0.044 | 5.699E-01 | 9.449E-01 |
| PPP2R1A  | 0.044 | 5.985E-01 | 1.314E-01 |
| SYTL4    | 0.044 | 8.458E-01 | 3.467E-02 |
| BCKDHA   | 0.044 | 7.632E-01 | 1.372E-01 |
| FAIM     | 0.044 | 7.203E-01 | 8.712E-02 |
| CAPN1    | 0.044 | 7.222E-01 | 6.515E-02 |
| AGAP9    | 0.044 | 8.533E-01 | 5.121E-02 |
| DCHS2    | 0.044 | 9.314E-01 | 1.525E-01 |
| ADGRL4   | 0.044 | 8.494E-01 | 3.390E-01 |
| BCAP29   | 0.044 | 6.989E-01 | 2.575E-01 |
| RNF167   | 0.044 | 6.612E-01 | 1.939E-01 |
| KLHDC1   | 0.044 | 8.361E-01 | 4.071E-01 |
| PIIB     | 0.044 | 7.029E-01 | 8.342E-02 |
| NFE2L1   | 0.044 | 6.971E-01 | 3.474E-01 |
| TRMT44   | 0.044 | 6.884E-01 | 6.479E-01 |
| SPAST    | 0.044 | 6.455E-01 | 2.356E-01 |
| NAB2     | 0.044 | 7.927E-01 | 2.447E-01 |
| TST      | 0.043 | 8.661E-01 | 7.571E-01 |
| FASTK    | 0.043 | 7.390E-01 | 5.837E-01 |
| NUFIP2   | 0.043 | 7.152E-01 | 6.562E-01 |
| FBXL18   | 0.043 | 8.171E-01 | 5.788E-01 |
| RASIP1   | 0.043 | 8.883E-01 | 1.966E-01 |
| LRRC42   | 0.043 | 7.874E-01 | 1.944E-01 |
| GPAT4    | 0.043 | 7.526E-01 | 5.769E-01 |
| MIR3200  | 0.043 | NA        | 2.078E-01 |
| YY2      | 0.043 | 8.164E-01 | 9.763E-01 |
| ARHGEF37 | 0.043 | 8.791E-01 | 9.763E-01 |
| RAB43    | 0.043 | 7.958E-01 | 9.763E-01 |
| MT1E     | 0.043 | 9.238E-01 | 9.763E-01 |
| ATP6V0C  | 0.043 | 6.954E-01 | 9.745E-01 |
| SIAE     | 0.043 | 8.208E-01 | 9.745E-01 |
| RETREG1  | 0.043 | 9.095E-01 | 9.741E-01 |
| BUD13    | 0.043 | 6.362E-01 | 1.890E-01 |
| MROH8    | 0.043 | 8.481E-01 | 1.751E-01 |
| ALDH9A1  | 0.043 | 7.453E-01 | 5.946E-01 |
| MIR378J  | 0.043 | 8.862E-01 | 6.899E-01 |
| WDR60    | 0.043 | 7.125E-01 | 1.413E-01 |
| TCF12    | 0.043 | 7.251E-01 | 3.487E-01 |
| DPY19L4  | 0.043 | 7.475E-01 | 4.850E-01 |
| HEATR5A  | 0.043 | 7.161E-01 | 1.448E-01 |

|            |       |           |           |
|------------|-------|-----------|-----------|
| VPS13C     | 0.043 | 7.671E-01 | 1.490E-01 |
| BPTF       | 0.043 | 6.983E-01 | 4.311E-01 |
| TMEM43     | 0.043 | 7.275E-01 | 1.594E-01 |
| ODF3       | 0.043 | 9.508E-01 | 1.003E-01 |
| FAM168A    | 0.043 | 7.193E-01 | 8.714E-02 |
| EPC2       | 0.043 | 6.559E-01 | 1.902E-01 |
| TMEM101    | 0.043 | 7.572E-01 | 3.373E-01 |
| RTL8A      | 0.043 | 7.559E-01 | 4.120E-01 |
| ART5       | 0.043 | 9.272E-01 | 1.774E-01 |
| MAZ        | 0.043 | 7.481E-01 | 2.477E-01 |
| TRIP13     | 0.043 | 8.632E-01 | 1.256E-01 |
| FOSL1      | 0.043 | 9.041E-01 | 7.794E-02 |
| MRPS5      | 0.043 | 6.683E-01 | 1.964E-01 |
| AL391650.1 | 0.043 | 8.448E-01 | 1.078E-01 |
| ZSCAN22    | 0.043 | 6.840E-01 | 6.703E-01 |
| SNRNP40    | 0.043 | 6.603E-01 | 3.519E-01 |
| ZNF428     | 0.043 | 7.966E-01 | 7.444E-01 |
| OSBPL9     | 0.042 | 6.261E-01 | 8.496E-02 |
| ADGRG1     | 0.042 | 8.329E-01 | 2.248E-01 |
| NIM1K      | 0.042 | 8.655E-01 | 1.684E-01 |
| SPTSSA     | 0.042 | 8.296E-01 | 2.278E-01 |
| NABP2      | 0.042 | 6.927E-01 | 2.989E-01 |
| LLGL2      | 0.042 | 8.504E-01 | 1.184E-01 |
| UPF3B      | 0.042 | 7.283E-01 | 2.142E-01 |
| HRCT1      | 0.042 | 9.171E-01 | 4.395E-01 |
| PIH1D1     | 0.042 | 6.962E-01 | 7.448E-02 |
| CADM1      | 0.042 | 9.238E-01 | 5.495E-01 |
| TRMT61B    | 0.042 | 6.935E-01 | 9.728E-02 |
| GNG3       | 0.042 | 8.496E-01 | 2.463E-01 |
| ZNF613     | 0.042 | 8.414E-01 | 1.621E-01 |
| BROX       | 0.042 | 6.504E-01 | 3.729E-01 |
| NOC2L      | 0.042 | 6.814E-01 | 3.181E-01 |
| PTPRA      | 0.042 | 6.073E-01 | 1.984E-01 |
| DHX57      | 0.042 | 6.516E-01 | 6.168E-01 |
| HSDL2      | 0.042 | 8.416E-01 | 8.339E-02 |
| ALX3       | 0.042 | 9.671E-01 | 1.699E-01 |
| GMPS       | 0.042 | 7.299E-01 | 2.779E-01 |
| L2HGDH     | 0.042 | 7.941E-01 | 2.582E-01 |
| RNF207     | 0.042 | 8.643E-01 | 7.039E-01 |
| ALDH18A1   | 0.042 | 6.486E-01 | 9.989E-02 |
| SMG6       | 0.042 | 7.794E-01 | 5.039E-01 |
| GRB2       | 0.042 | 6.030E-01 | 2.772E-01 |
| CCL7       | 0.042 | 9.450E-01 | 1.041E-01 |
| UBL4A      | 0.042 | 7.439E-01 | 1.156E-01 |
| SLC25A19   | 0.042 | 7.535E-01 | 8.509E-01 |
| DPP8       | 0.042 | 6.722E-01 | 1.069E-01 |
| PTPRM      | 0.042 | 8.839E-01 | 5.604E-02 |
| OR2J2      | 0.042 | NA        | 7.556E-01 |
| UHRF1      | 0.042 | 8.278E-01 | 1.273E-01 |
| HINT2      | 0.042 | 8.033E-01 | 4.444E-01 |

|            |       |           |           |
|------------|-------|-----------|-----------|
| PCLAF      | 0.042 | 8.350E-01 | 2.542E-01 |
| TBKBP1     | 0.042 | 8.167E-01 | 2.378E-01 |
| SPINK2     | 0.042 | 9.326E-01 | 8.592E-02 |
| NECAP2     | 0.042 | 6.507E-01 | 1.454E-01 |
| TMTC4      | 0.042 | 8.192E-01 | 4.009E-01 |
| EIF4G1     | 0.042 | 6.713E-01 | 1.644E-01 |
| EIF4H      | 0.042 | 6.239E-01 | 3.947E-01 |
| SQSTM1     | 0.042 | 8.018E-01 | 1.353E-01 |
| C6orf47    | 0.042 | 6.273E-01 | 1.351E-01 |
| GOLPH3L    | 0.042 | 7.812E-01 | 9.539E-01 |
| PUS7       | 0.042 | 7.851E-01 | 9.514E-01 |
| TRPM8      | 0.042 | 9.346E-01 | 5.727E-01 |
| DNAJC8     | 0.041 | 5.474E-01 | 1.489E-01 |
| PFDN2      | 0.041 | 8.306E-01 | 1.427E-01 |
| AC010325.1 | 0.041 | 9.218E-01 | 5.797E-01 |
| MIR3924    | 0.041 | NA        | 5.038E-01 |
| MIR4293    | 0.041 | NA        | 3.496E-01 |
| MIR618     | 0.041 | NA        | 7.552E-02 |
| AL359922.1 | 0.041 | NA        | 5.779E-01 |
| MIR6823    | 0.041 | NA        | 1.156E-01 |
| MIR4448    | 0.041 | NA        | 2.647E-01 |
| IQCF5      | 0.041 | NA        | 3.477E-01 |
| LSM2       | 0.041 | 7.485E-01 | 1.239E-01 |
| DPM2       | 0.041 | 7.656E-01 | 2.424E-01 |
| CDADC1     | 0.041 | 7.627E-01 | 2.003E-01 |
| GRIP2      | 0.041 | 9.026E-01 | 9.740E-02 |
| SLIT1      | 0.041 | 9.081E-01 | 1.408E-01 |
| SYNE4      | 0.041 | 9.094E-01 | 5.972E-01 |
| HSP90AB1   | 0.041 | 7.267E-01 | 1.159E-01 |
| ZNF730     | 0.041 | 9.379E-01 | 5.275E-02 |
| ZNF256     | 0.041 | 8.121E-01 | 1.180E-01 |
| HSD11B2    | 0.041 | 9.026E-01 | 3.013E-01 |
| BCL7B      | 0.041 | 6.141E-01 | 2.751E-01 |
| CLN6       | 0.041 | 7.754E-01 | 7.627E-01 |
| MIR1273F   | 0.041 | NA        | 5.424E-01 |
| DICER1     | 0.041 | 7.415E-01 | 3.029E-01 |
| DBI        | 0.041 | 8.184E-01 | 6.032E-01 |
| AL162231.3 | 0.041 | NA        | 1.268E-01 |
| C3orf14    | 0.041 | 9.003E-01 | 1.598E-01 |
| YPEL4      | 0.041 | 8.693E-01 | 3.835E-01 |
| KRT9       | 0.041 | 9.344E-01 | 4.428E-01 |
| PPP2R5D    | 0.041 | 6.516E-01 | 9.240E-02 |
| ATP8B2     | 0.041 | 8.849E-01 | 4.099E-01 |
| PPP2CB     | 0.041 | 7.274E-01 | 2.976E-01 |
| CRTC2      | 0.041 | 6.603E-01 | 2.953E-01 |
| ITGAV      | 0.041 | 8.317E-01 | 7.676E-01 |
| IGHMBP2    | 0.041 | 7.587E-01 | 1.795E-01 |
| UBN2       | 0.041 | 7.696E-01 | 1.632E-01 |
| NAP1L5     | 0.041 | 8.494E-01 | 2.495E-01 |
| STEAP1     | 0.041 | 8.937E-01 | 4.563E-01 |

|            |       |           |           |
|------------|-------|-----------|-----------|
| SAR1B      | 0.041 | 6.630E-01 | 3.472E-01 |
| TXNDC16    | 0.041 | 8.523E-01 | 6.297E-01 |
| ALAS1      | 0.041 | 8.599E-01 | 2.334E-01 |
| KLC2       | 0.041 | 7.363E-01 | 2.843E-01 |
| AC005520.1 | 0.041 | 9.128E-01 | 1.992E-01 |
| CBLL1      | 0.041 | 6.454E-01 | 2.787E-01 |
| NQO1       | 0.041 | 9.018E-01 | 1.627E-01 |
| GOLGB1     | 0.041 | 7.029E-01 | 4.306E-01 |
| ZDHHC4     | 0.041 | 7.085E-01 | 9.771E-01 |
| MCL1       | 0.041 | 7.941E-01 | 9.771E-01 |
| UROS       | 0.041 | 7.295E-01 | 9.771E-01 |
| OR52J3     | 0.041 | NA        | 9.771E-01 |
| MIR3161    | 0.041 | NA        | 9.771E-01 |
| OR2L5      | 0.041 | NA        | 9.771E-01 |
| HKR1       | 0.041 | 7.800E-01 | 9.771E-01 |
| MASTL      | 0.041 | 7.783E-01 | 9.771E-01 |
| HOXC5      | 0.041 | 9.394E-01 | 9.771E-01 |
| SIAH2      | 0.041 | 7.203E-01 | 9.771E-01 |
| AC099811.2 | 0.041 | NA        | 9.771E-01 |
| FLYWCH2    | 0.041 | 7.709E-01 | 9.771E-01 |
| GINM1      | 0.040 | 6.776E-01 | 9.771E-01 |
| MLX        | 0.040 | 5.935E-01 | 9.771E-01 |
| GOLGA1     | 0.040 | 6.030E-01 | 9.771E-01 |
| TFDP1      | 0.040 | 7.941E-01 | 9.771E-01 |
| ANKRD65    | 0.040 | 9.095E-01 | 9.771E-01 |
| TBC1D31    | 0.040 | 7.567E-01 | 3.558E-01 |
| PAXIP1     | 0.040 | 7.064E-01 | 8.870E-02 |
| ARHGAP35   | 0.040 | 7.756E-01 | 2.852E-01 |
| LMBR1      | 0.040 | 6.912E-01 | 5.265E-01 |
| ZNF433     | 0.040 | 8.512E-01 | 5.599E-01 |
| PRPSAP1    | 0.040 | 6.222E-01 | 4.701E-01 |
| ENTPD7     | 0.040 | 8.655E-01 | 4.545E-01 |
| ADAR       | 0.040 | 7.251E-01 | 2.500E-01 |
| CHP1       | 0.040 | 7.057E-01 | 1.538E-02 |
| ZNF236     | 0.040 | 7.661E-01 | 7.443E-02 |
| NPPB       | 0.040 | 9.640E-01 | 6.657E-01 |
| SRRM5      | 0.040 | 8.628E-01 | 1.158E-01 |
| VPS45      | 0.040 | 7.098E-01 | 4.977E-01 |
| HERC1      | 0.040 | 6.834E-01 | 1.611E-01 |
| IRAK1      | 0.040 | 8.107E-01 | 8.991E-01 |
| OR13H1     | 0.040 | NA        | 1.781E-01 |
| ZNF514     | 0.040 | 8.024E-01 | 5.713E-01 |
| NFATC3     | 0.040 | 7.710E-01 | 2.964E-01 |
| ARL6IP1    | 0.040 | 7.771E-01 | 6.074E-01 |
| KIF5B      | 0.040 | 7.301E-01 | 7.813E-02 |
| CTNNB1     | 0.040 | 7.606E-01 | 1.772E-01 |
| ASCC1      | 0.040 | 7.203E-01 | 1.208E-01 |
| SLCO1C1    | 0.040 | 9.056E-01 | 6.284E-02 |
| NBPF9      | 0.040 | 8.096E-01 | 2.986E-01 |
| RANBP6     | 0.040 | 7.875E-01 | 7.788E-02 |

|            |       |           |           |
|------------|-------|-----------|-----------|
| MIR6842    | 0.040 | NA        | 6.767E-02 |
| GDE1       | 0.040 | 8.103E-01 | 4.925E-01 |
| WAPL       | 0.040 | 6.545E-01 | 8.981E-01 |
| TAF3       | 0.040 | 7.563E-01 | 1.721E-01 |
| DLK2       | 0.040 | 9.093E-01 | 8.573E-01 |
| RAB8B      | 0.040 | 7.739E-01 | 8.886E-01 |
| PLBD2      | 0.040 | 7.467E-01 | 2.946E-01 |
| BRPF3      | 0.040 | 7.651E-01 | 3.716E-01 |
| SNAPC5     | 0.040 | 6.840E-01 | 5.905E-01 |
| PPP1R8     | 0.040 | 5.573E-01 | 5.057E-01 |
| EFTUD2     | 0.040 | 6.453E-01 | 7.737E-02 |
| VEGFD      | 0.040 | 9.218E-01 | 4.657E-01 |
| ACD        | 0.040 | 7.551E-01 | 2.758E-01 |
| CASTOR1    | 0.040 | 8.546E-01 | 1.179E-01 |
| TCF24      | 0.040 | 8.999E-01 | 4.327E-01 |
| VAX2       | 0.040 | 9.310E-01 | 5.941E-01 |
| LIF        | 0.039 | 9.152E-01 | 4.948E-01 |
| ZNF570     | 0.039 | 8.561E-01 | 4.656E-01 |
| ISY1-RAB43 | 0.039 | 9.272E-01 | 3.522E-01 |
| QSOX2      | 0.039 | 8.197E-01 | 4.016E-01 |
| OARD1      | 0.039 | 7.339E-01 | 5.497E-02 |
| HSP90B1    | 0.039 | 7.494E-01 | 1.734E-01 |
| C9orf3     | 0.039 | 8.533E-01 | 7.364E-01 |
| SMIM18     | 0.039 | 9.219E-01 | 6.654E-02 |
| GPATCH8    | 0.039 | 6.910E-01 | 4.009E-01 |
| NVL        | 0.039 | 6.720E-01 | 2.795E-01 |
| C10orf53   | 0.039 | 9.725E-01 | 2.043E-01 |
| GBP7       | 0.039 | 9.142E-01 | 3.179E-01 |
| NUDCD1     | 0.039 | 7.883E-01 | 3.754E-01 |
| BUD31      | 0.039 | 6.776E-01 | 8.411E-02 |
| SPATA18    | 0.039 | 9.010E-01 | 1.257E-01 |
| SCN3B      | 0.039 | 9.283E-01 | 4.273E-01 |
| HACL1      | 0.039 | 7.883E-01 | 7.483E-01 |
| TUBA4B     | 0.039 | 9.347E-01 | 9.721E-01 |
| HPS3       | 0.039 | 7.627E-01 | 9.709E-01 |
| AP5Z1      | 0.039 | 7.354E-01 | 9.639E-01 |
| SECISBP2L  | 0.039 | 7.769E-01 | 9.636E-01 |
| MSL1       | 0.039 | 6.813E-01 | 9.587E-01 |
| OR11A1     | 0.039 | NA        | 9.558E-01 |
| GADL1      | 0.039 | 9.442E-01 | 9.532E-01 |
| SLC2A11    | 0.039 | 8.513E-01 | 1.893E-01 |
| FKBP1A     | 0.039 | 6.979E-01 | 2.029E-01 |
| TXNDC9     | 0.039 | 7.598E-01 | 1.370E-01 |
| MIGA1      | 0.039 | 7.868E-01 | 8.009E-01 |
| PPP2R2D    | 0.039 | 7.441E-01 | 5.158E-01 |
| WNT10B     | 0.039 | 9.190E-01 | 6.371E-01 |
| CHTOP      | 0.039 | 5.895E-01 | 2.270E-01 |
| PHF7       | 0.039 | 8.195E-01 | 1.436E-01 |
| NAPA       | 0.039 | 6.842E-01 | 8.343E-01 |
| SPA17      | 0.039 | 8.079E-01 | 1.522E-01 |



|          |       |           |           |
|----------|-------|-----------|-----------|
| NOX1     | 0.039 | 8.973E-01 | 4.126E-02 |
| IGFBP6   | 0.039 | 9.267E-01 | 5.342E-01 |
| PSMC3    | 0.039 | 7.618E-01 | 6.558E-01 |
| ATP8B4   | 0.039 | 8.945E-01 | 1.241E-01 |
| ACAA2    | 0.039 | 8.908E-01 | 1.245E-01 |
| KRT19    | 0.039 | 8.986E-01 | 1.869E-01 |
| MYB      | 0.039 | 9.181E-01 | 7.617E-01 |
| EVI2A    | 0.039 | 9.133E-01 | 8.136E-01 |
| HMGB3    | 0.039 | 8.281E-01 | 4.165E-01 |
| RELA     | 0.039 | 5.714E-01 | 2.210E-01 |
| OR2AG1   | 0.039 | NA        | 2.548E-01 |
| MIR190A  | 0.039 | NA        | 3.846E-01 |
| MIR5739  | 0.039 | NA        | 2.025E-01 |
| OR5W2    | 0.039 | NA        | 1.057E-01 |
| MIR4433B | 0.039 | NA        | 2.154E-01 |
| MIR551A  | 0.039 | NA        | 1.306E-01 |
| USP12    | 0.039 | 7.443E-01 | 3.516E-01 |
| IRX5     | 0.039 | 9.292E-01 | 4.445E-01 |
| IDE      | 0.039 | 7.294E-01 | 2.800E-01 |
| PPFIBP1  | 0.039 | 8.383E-01 | 9.337E-01 |
| FAM3A    | 0.038 | 7.697E-01 | 5.120E-02 |
| TOPBP1   | 0.038 | 7.763E-01 | 2.248E-01 |
| PSMA7    | 0.038 | 7.339E-01 | 1.640E-01 |
| RAD23A   | 0.038 | 6.371E-01 | 1.800E-01 |
| NOMO3    | 0.038 | 8.981E-01 | 2.112E-01 |
| GNRHR    | 0.038 | 9.051E-01 | 6.105E-01 |
| SLC38A10 | 0.038 | 7.559E-01 | 6.947E-02 |
| KIF18B   | 0.038 | 8.544E-01 | 5.831E-01 |
| RPS6KA2  | 0.038 | 8.620E-01 | 1.646E-01 |
| TERF2IP  | 0.038 | 7.099E-01 | 7.288E-01 |
| ZNF823   | 0.038 | 8.781E-01 | 1.003E-01 |
| RAB1B    | 0.038 | 6.650E-01 | 5.545E-01 |
| MIR550A1 | 0.038 | NA        | 7.373E-01 |
| TMEM45B  | 0.038 | 9.250E-01 | 5.815E-01 |
| BCDIN3D  | 0.038 | 7.579E-01 | 9.366E-01 |
| NBPF14   | 0.038 | 8.362E-01 | 2.539E-01 |
| NXF2     | 0.038 | NA        | 1.202E-01 |
| PRDX1    | 0.038 | 7.998E-01 | 1.924E-01 |
| HS3ST5   | 0.038 | 9.576E-01 | 7.960E-02 |
| RNF213   | 0.038 | 8.534E-01 | 5.244E-01 |
| SEC63    | 0.038 | 6.620E-01 | 8.021E-02 |
| CKS2     | 0.038 | 8.473E-01 | 1.772E-01 |
| ZNF497   | 0.038 | 8.345E-01 | 3.080E-01 |
| NSFL1C   | 0.038 | 7.024E-01 | 1.752E-01 |
| UBR3     | 0.038 | 7.415E-01 | 8.245E-01 |
| AHCTF1   | 0.038 | 7.244E-01 | 4.777E-01 |
| RAB29    | 0.038 | 8.167E-01 | 1.831E-01 |
| CCDC85B  | 0.038 | 8.759E-01 | 8.946E-01 |
| MIR624   | 0.038 | NA        | 5.476E-01 |
| PRIM2    | 0.038 | 7.513E-01 | 5.814E-01 |

|            |       |           |           |
|------------|-------|-----------|-----------|
| APC2       | 0.038 | 8.694E-01 | 1.913E-01 |
| TSHR       | 0.038 | 9.389E-01 | 9.531E-01 |
| LIN37      | 0.038 | 7.795E-01 | 5.873E-01 |
| TOMM70     | 0.038 | 7.029E-01 | 9.273E-01 |
| KIAA1328   | 0.038 | 7.523E-01 | 1.368E-01 |
| LDAH       | 0.038 | 8.055E-01 | 5.460E-01 |
| CRCP       | 0.038 | 6.612E-01 | 7.743E-01 |
| APLNR      | 0.037 | 9.095E-01 | 1.449E-01 |
| MANSC1     | 0.037 | 8.592E-01 | 4.358E-01 |
| SAC3D1     | 0.037 | 8.519E-01 | 1.828E-01 |
| FHAD1      | 0.037 | 9.171E-01 | 6.721E-01 |
| CCDC71L    | 0.037 | 8.886E-01 | 5.855E-01 |
| MIR661     | 0.037 | 9.563E-01 | 2.252E-01 |
| KIAA2013   | 0.037 | 6.662E-01 | 8.516E-01 |
| LARP1B     | 0.037 | 7.722E-01 | 4.805E-01 |
| HAUS5      | 0.037 | 7.902E-01 | 1.820E-01 |
| UBAP1      | 0.037 | 7.575E-01 | 6.826E-01 |
| KRTAP2-4   | 0.037 | NA        | 2.811E-01 |
| CORO2A     | 0.037 | 8.688E-01 | 2.982E-01 |
| MIR4671    | 0.037 | NA        | 2.558E-01 |
| OXNAD1     | 0.037 | 7.364E-01 | 1.464E-01 |
| RMI1       | 0.037 | 8.317E-01 | 4.711E-01 |
| AC022400.6 | 0.037 | 8.540E-01 | 1.454E-01 |
| SZRD1      | 0.037 | 5.896E-01 | 1.447E-01 |
| ACVR1      | 0.037 | 8.135E-01 | 9.928E-02 |
| RNF216     | 0.037 | 7.290E-01 | 1.537E-01 |
| MAP2K5     | 0.037 | 6.754E-01 | 7.714E-01 |
| SLC12A1    | 0.037 | 9.551E-01 | 8.232E-02 |
| MAPRE2     | 0.037 | 8.772E-01 | 8.057E-01 |
| F1E1-BLOC1 | 0.037 | NA        | 5.475E-01 |
| STRADB     | 0.037 | 8.235E-01 | 3.083E-01 |
| ZFP91      | 0.037 | 6.949E-01 | 7.182E-02 |
| ZNF777     | 0.037 | 6.387E-01 | 1.247E-01 |
| LRRC71     | 0.037 | 9.192E-01 | 1.268E-01 |
| MEI4       | 0.037 | 9.600E-01 | 3.373E-01 |
| SETD2      | 0.037 | 7.114E-01 | 3.342E-01 |
| PIGK       | 0.037 | 8.046E-01 | 1.392E-01 |
| CRYBA2     | 0.037 | 9.656E-01 | 1.990E-01 |
| PPP3CB     | 0.037 | 7.234E-01 | 1.443E-01 |
| TSC22D4    | 0.037 | 7.494E-01 | 9.447E-02 |
| PIK3R1     | 0.037 | 8.713E-01 | 3.855E-01 |
| VCP        | 0.037 | 7.098E-01 | 1.368E-01 |
| OSR1       | 0.037 | 9.333E-01 | 1.624E-01 |
| HOXC10     | 0.037 | 9.579E-01 | 5.378E-01 |
| CKB        | 0.037 | 9.207E-01 | 4.472E-01 |
| RAB36      | 0.037 | 8.925E-01 | 2.071E-01 |
| EPB41L1    | 0.037 | 8.772E-01 | 3.508E-01 |
| NELFE      | 0.037 | 7.719E-01 | 6.613E-01 |
| EIF5B      | 0.037 | 7.970E-01 | 3.944E-01 |
| CLASP2     | 0.037 | 7.415E-01 | 1.385E-01 |

|          |       |           |           |
|----------|-------|-----------|-----------|
| LRRC45   | 0.036 | 8.283E-01 | 2.108E-01 |
| RAP1A    | 0.036 | 7.024E-01 | 4.570E-01 |
| SLC1A5   | 0.036 | 8.427E-01 | 1.441E-01 |
| GPR27    | 0.036 | 9.329E-01 | 9.782E-01 |
| SYAP1    | 0.036 | 6.884E-01 | 9.752E-01 |
| ALLC     | 0.036 | 9.575E-01 | 9.705E-01 |
| KLLN     | 0.036 | 8.574E-01 | 9.675E-01 |
| PSMD12   | 0.036 | 6.870E-01 | 9.675E-01 |
| TAF1     | 0.036 | 7.770E-01 | 9.628E-01 |
| C3       | 0.036 | 9.344E-01 | 4.474E-01 |
| EFL1     | 0.036 | 7.244E-01 | 1.406E-01 |
| MIR6832  | 0.036 | 9.455E-01 | 4.220E-01 |
| NFIL3    | 0.036 | 8.662E-01 | 2.943E-01 |
| RNF112   | 0.036 | 9.171E-01 | 2.648E-01 |
| KIF22    | 0.036 | 8.297E-01 | 1.207E-01 |
| KLHL33   | 0.036 | 9.519E-01 | 1.858E-01 |
| IGSF8    | 0.036 | 8.480E-01 | 5.788E-01 |
| ARHGAP21 | 0.036 | 8.349E-01 | 5.119E-01 |
| ENHO     | 0.036 | 9.425E-01 | 2.933E-01 |
| PIGW     | 0.036 | 7.725E-01 | 1.698E-01 |
| DCDC2C   | 0.036 | NA        | 1.419E-01 |
| MIR6816  | 0.036 | NA        | 3.134E-01 |
| POTED    | 0.036 | NA        | 5.234E-01 |
| MIR4782  | 0.036 | 9.456E-01 | 8.013E-01 |
| RND3     | 0.036 | 8.770E-01 | 2.135E-01 |
| GSC2     | 0.036 | NA        | 5.265E-01 |
| SELPLG   | 0.036 | 9.225E-01 | 5.038E-01 |
| AKAP2    | 0.036 | 9.345E-01 | 2.491E-01 |
| GALNT6   | 0.036 | 9.103E-01 | 2.414E-01 |
| KLHL9    | 0.036 | 8.715E-01 | 7.404E-01 |
| ZNF790   | 0.036 | 8.145E-01 | 7.531E-01 |
| KRBOX4   | 0.036 | 7.475E-01 | 7.399E-01 |
| SMAD2    | 0.036 | 7.036E-01 | 2.879E-01 |
| DYNC1LI1 | 0.036 | 7.222E-01 | 9.265E-01 |
| ACTR2    | 0.036 | 7.291E-01 | 4.045E-01 |
| AURKA    | 0.036 | 8.635E-01 | 5.160E-01 |
| FOXM1    | 0.036 | 8.834E-01 | 2.330E-01 |
| ZNF226   | 0.036 | 7.904E-01 | 1.448E-01 |
| MPP5     | 0.035 | 7.691E-01 | 2.491E-01 |
| SOS2     | 0.035 | 7.480E-01 | 7.608E-01 |
| ZNF417   | 0.035 | 7.957E-01 | 5.564E-02 |
| PUS10    | 0.035 | 8.278E-01 | 6.583E-01 |
| POTEI    | 0.035 | 9.328E-01 | 2.162E-01 |
| SCYL1    | 0.035 | 6.958E-01 | 1.898E-01 |
| GPATCH3  | 0.035 | 7.474E-01 | 1.301E-01 |
| HSPB1    | 0.035 | 8.876E-01 | 1.238E-01 |
| NBR1     | 0.035 | 7.196E-01 | 1.135E-01 |
| TMEM203  | 0.035 | 7.431E-01 | 2.864E-01 |
| ATP6V1E1 | 0.035 | 7.283E-01 | 1.323E-01 |
| FMNL3    | 0.035 | 8.545E-01 | 5.260E-01 |

|            |       |           |           |
|------------|-------|-----------|-----------|
| AC003688.1 | 0.035 | NA        | 7.329E-01 |
| AC093893.1 | 0.035 | 9.534E-01 | 6.500E-01 |
| ACSS3      | 0.035 | 9.314E-01 | 1.397E-01 |
| PSMB5      | 0.035 | 7.536E-01 | 3.060E-01 |
| RTN2       | 0.035 | 8.760E-01 | 2.783E-01 |
| MIR6895    | 0.035 | 9.326E-01 | 1.908E-01 |
| PAFAH1B1   | 0.035 | 6.641E-01 | 1.688E-01 |
| UBQLN4     | 0.035 | 7.528E-01 | 6.442E-01 |
| SNRNP200   | 0.035 | 7.041E-01 | 2.017E-01 |
| POP4       | 0.035 | 8.153E-01 | 5.967E-01 |
| PRAF2      | 0.035 | 8.512E-01 | 4.555E-01 |
| TAOK2      | 0.035 | 7.122E-01 | 5.104E-01 |
| ARMCX5     | 0.035 | 7.523E-01 | 6.203E-01 |
| TMEM143    | 0.035 | 7.904E-01 | 7.348E-01 |
| ZC3H6      | 0.035 | 8.168E-01 | 2.189E-01 |
| WIPF2      | 0.035 | 7.225E-01 | 8.636E-01 |
| PTBP3      | 0.035 | 7.912E-01 | 2.232E-01 |
| EPS8L2     | 0.035 | 8.668E-01 | 1.501E-01 |
| AL110118.2 | 0.035 | 9.092E-01 | 1.151E-01 |
| ABCF3      | 0.035 | 6.409E-01 | 9.500E-01 |
| RTEL1      | 0.035 | 8.552E-01 | 9.479E-01 |
| SEMA3C     | 0.035 | 8.933E-01 | 9.410E-01 |
| BTBD1      | 0.035 | 6.324E-01 | 4.917E-01 |
| CREBL2     | 0.035 | 7.832E-01 | 7.734E-01 |
| OR6C2      | 0.035 | 9.835E-01 | 3.254E-01 |
| ARPC5L     | 0.035 | 8.046E-01 | 7.271E-02 |
| GNPAT      | 0.035 | 6.664E-01 | 8.434E-01 |
| PRTG       | 0.035 | 9.356E-01 | 1.924E-01 |
| ITPKC      | 0.035 | 8.471E-01 | 7.011E-01 |
| NEK8       | 0.035 | 8.574E-01 | 2.091E-01 |
| KDM3A      | 0.035 | 8.054E-01 | 6.219E-01 |
| GBP3       | 0.035 | 8.903E-01 | 7.132E-01 |
| PUDP       | 0.035 | 8.494E-01 | 5.920E-01 |
| M6PR       | 0.035 | 8.230E-01 | 3.730E-01 |
| AFMID      | 0.035 | 7.867E-01 | 2.394E-01 |
| GPBP1L1    | 0.035 | 6.321E-01 | 1.985E-01 |
| SLC25A14   | 0.035 | 7.460E-01 | 1.910E-01 |
| DPY30      | 0.035 | 7.296E-01 | 2.017E-01 |
| SENP5      | 0.035 | 6.992E-01 | 7.002E-01 |
| FGFBP3     | 0.035 | 8.962E-01 | 1.743E-01 |
| GPATCH11   | 0.035 | 7.590E-01 | 6.797E-01 |
| VEZF1      | 0.035 | 7.360E-01 | 1.294E-01 |
| ERI3       | 0.034 | 7.441E-01 | 2.892E-01 |
| NO80B-WBP  | 0.034 | 9.100E-01 | 2.750E-01 |
| JMJD1C     | 0.034 | 8.127E-01 | 5.899E-01 |
| CHRNA9     | 0.034 | 9.600E-01 | 4.200E-01 |
| WIPI2      | 0.034 | 7.161E-01 | 7.922E-01 |
| PRSS53     | 0.034 | 8.727E-01 | 1.501E-01 |
| TDRD3      | 0.034 | 7.710E-01 | 1.181E-01 |
| CTDNEP1    | 0.034 | 7.311E-01 | 8.152E-01 |

|           |       |           |           |
|-----------|-------|-----------|-----------|
| CMC2      | 0.034 | 7.722E-01 | 5.578E-02 |
| BAHCC1    | 0.034 | 8.870E-01 | 2.173E-01 |
| MPI       | 0.034 | 7.696E-01 | 1.262E-01 |
| CCDC7     | 0.034 | 8.143E-01 | 4.635E-01 |
| KAT7      | 0.034 | 7.486E-01 | 5.246E-01 |
| MRPL15    | 0.034 | 7.759E-01 | 2.065E-01 |
| GSK3A     | 0.034 | 7.177E-01 | 2.530E-01 |
| KDM5A     | 0.034 | 7.387E-01 | 1.007E-01 |
| KIAA1549  | 0.034 | 9.033E-01 | 9.049E-01 |
| EML3      | 0.034 | 7.782E-01 | 9.200E-01 |
| NAA50     | 0.034 | 7.583E-01 | 3.706E-01 |
| GPATCH4   | 0.034 | 7.909E-01 | 5.229E-01 |
| TMEM261   | 0.034 | 8.383E-01 | 6.503E-01 |
| ZNHIT3    | 0.034 | 7.346E-01 | 3.730E-01 |
| AGA       | 0.034 | 8.145E-01 | 7.667E-01 |
| TEX11     | 0.034 | 9.246E-01 | 3.498E-01 |
| FRS3      | 0.034 | 8.074E-01 | 1.563E-01 |
| JOSD2     | 0.034 | 8.544E-01 | 3.772E-01 |
| LRRC23    | 0.034 | 8.334E-01 | 2.192E-01 |
| LRRC47    | 0.034 | 6.426E-01 | 4.366E-01 |
| CALHM2    | 0.034 | 8.632E-01 | 6.985E-02 |
| KCNJ13    | 0.034 | 9.499E-01 | 8.061E-01 |
| B3GLCT    | 0.034 | 8.369E-01 | 2.272E-01 |
| OTUD5     | 0.034 | 6.647E-01 | 2.703E-01 |
| DPP3      | 0.034 | 7.627E-01 | 2.646E-01 |
| BBS12     | 0.034 | 8.055E-01 | 1.512E-01 |
| DYNC1H1   | 0.034 | 6.915E-01 | 8.837E-01 |
| MIR5089   | 0.034 | NA        | 7.146E-02 |
| TNFAIP8L2 | 0.034 | 9.261E-01 | 9.789E-01 |
| ZSWIM8    | 0.034 | 7.874E-01 | 9.789E-01 |
| ABI1      | 0.034 | 7.382E-01 | 9.745E-01 |
| FHOD1     | 0.034 | 8.512E-01 | 9.741E-01 |
| PIGQ      | 0.033 | 8.007E-01 | 9.737E-01 |
| WDR88     | 0.033 | 8.775E-01 | 9.715E-01 |
| RALGAPB   | 0.033 | 7.513E-01 | 9.714E-01 |
| ANKRD23   | 0.033 | 8.834E-01 | 7.438E-01 |
| LELP1     | 0.033 | NA        | 6.613E-02 |
| KDM2A     | 0.033 | 7.364E-01 | 1.284E-01 |
| NMI       | 0.033 | 8.590E-01 | 3.278E-01 |
| CCNO      | 0.033 | 9.019E-01 | 6.133E-01 |
| DAP3      | 0.033 | 7.325E-01 | 3.278E-01 |
| ELF5      | 0.033 | 9.498E-01 | 2.819E-01 |
| USP29     | 0.033 | NA        | 7.869E-01 |
| FAM234B   | 0.033 | 8.993E-01 | 4.636E-01 |
| MIR5088   | 0.033 | NA        | 9.239E-01 |
| OR2T33    | 0.033 | NA        | 2.942E-01 |
| PRY       | 0.033 | NA        | 6.413E-01 |
| PRR30     | 0.033 | NA        | 3.278E-01 |
| CCDC97    | 0.033 | 7.496E-01 | 3.377E-01 |
| AFF1      | 0.033 | 8.284E-01 | 2.042E-01 |

|            |       |           |           |
|------------|-------|-----------|-----------|
| NRP1       | 0.033 | 9.013E-01 | 1.804E-01 |
| SDC3       | 0.033 | 8.775E-01 | 8.014E-01 |
| DBR1       | 0.033 | 7.269E-01 | 3.739E-01 |
| C19orf57   | 0.033 | 9.100E-01 | 1.170E-01 |
| TLR5       | 0.033 | 9.052E-01 | 2.023E-01 |
| GCA        | 0.033 | 8.407E-01 | 1.534E-01 |
| DCK        | 0.033 | 8.361E-01 | 9.241E-01 |
| ARL11      | 0.033 | 9.122E-01 | 7.041E-01 |
| C11orf45   | 0.033 | 8.986E-01 | 7.896E-01 |
| INIP       | 0.033 | 7.464E-01 | 4.699E-01 |
| PDLIM4     | 0.033 | 9.292E-01 | 2.914E-01 |
| ARHGEF4    | 0.033 | 9.444E-01 | 1.938E-01 |
| NCAPD3     | 0.033 | 8.172E-01 | 2.548E-01 |
| SLC25A38   | 0.033 | 7.955E-01 | 3.845E-01 |
| CNIH4      | 0.033 | 7.446E-01 | 3.109E-01 |
| CRY1       | 0.033 | 7.967E-01 | 2.327E-01 |
| TM2D1      | 0.033 | 7.594E-01 | 1.875E-01 |
| GLOD4      | 0.033 | 7.247E-01 | 2.972E-01 |
| C2orf80    | 0.033 | 9.621E-01 | 7.574E-01 |
| MIR3122    | 0.033 | NA        | 1.126E-01 |
| SLC27A3    | 0.033 | 8.368E-01 | 8.889E-01 |
| MEGF9      | 0.033 | 8.626E-01 | 1.763E-01 |
| ADGRL2     | 0.033 | 9.174E-01 | 3.266E-01 |
| TMEM204    | 0.033 | 8.843E-01 | 2.227E-01 |
| KCNN4      | 0.033 | 9.237E-01 | 6.656E-01 |
| DYNLT3     | 0.033 | 8.666E-01 | 2.930E-01 |
| NKD2       | 0.033 | 9.427E-01 | 3.473E-01 |
| AC068533.4 | 0.033 | 9.314E-01 | 4.926E-01 |
| ZNF232     | 0.033 | 8.512E-01 | 1.736E-01 |
| HSPA12A    | 0.033 | 9.188E-01 | 4.390E-01 |
| PIP4K2C    | 0.033 | 7.906E-01 | 4.030E-01 |
| GRAMD1C    | 0.033 | 9.054E-01 | 1.949E-01 |
| ZPR1       | 0.033 | 7.489E-01 | 1.369E-01 |
| AIFM1      | 0.033 | 7.280E-01 | 2.098E-01 |
| PATE1      | 0.033 | 9.785E-01 | 2.852E-01 |
| ELOA       | 0.033 | 7.280E-01 | 3.370E-01 |
| C15orf61   | 0.032 | 7.902E-01 | 1.245E-01 |
| ZSCAN20    | 0.032 | 8.090E-01 | 1.913E-01 |
| EIF4G3     | 0.032 | 7.619E-01 | 2.363E-01 |
| ARSD       | 0.032 | 8.890E-01 | 2.374E-01 |
| CYP2U1     | 0.032 | 8.845E-01 | 3.925E-01 |
| NUP155     | 0.032 | 8.502E-01 | 7.295E-01 |
| TNFSF9     | 0.032 | 9.440E-01 | 5.002E-01 |
| AC027796.3 | 0.032 | 9.133E-01 | 2.003E-01 |
| FAM136A    | 0.032 | 8.067E-01 | 1.868E-01 |
| SMIM12     | 0.032 | 7.251E-01 | 3.591E-01 |
| RABGAP1    | 0.032 | 7.628E-01 | 2.510E-01 |
| C11orf54   | 0.032 | 8.329E-01 | 1.794E-01 |
| MPDZ       | 0.032 | 8.815E-01 | 9.733E-01 |
| ZNF2       | 0.032 | 7.480E-01 | 9.546E-01 |

|            |       |           |           |
|------------|-------|-----------|-----------|
| CUL5       | 0.032 | 7.643E-01 | 9.544E-01 |
| CYP2E1     | 0.032 | 9.444E-01 | 1.363E-01 |
| SCRN3      | 0.032 | 7.867E-01 | 3.346E-01 |
| JMJD6      | 0.032 | 7.637E-01 | 2.983E-02 |
| RPE        | 0.032 | 7.858E-01 | 2.395E-01 |
| RHOB       | 0.032 | 8.878E-01 | 3.378E-01 |
| SEMA3G     | 0.032 | 9.046E-01 | 2.711E-01 |
| RBM41      | 0.032 | 8.210E-01 | 2.299E-01 |
| AKT2       | 0.032 | 7.583E-01 | 7.224E-01 |
| RNF220     | 0.032 | 6.935E-01 | 1.092E-01 |
| TDRD10     | 0.032 | 9.317E-01 | 5.327E-01 |
| COA3       | 0.032 | 7.904E-01 | 3.433E-01 |
| NUP133     | 0.032 | 7.295E-01 | 3.647E-01 |
| MAPK15     | 0.032 | 9.341E-01 | 6.662E-02 |
| ABHD8      | 0.032 | 8.655E-01 | 4.964E-01 |
| CAB39      | 0.032 | 8.220E-01 | 4.876E-01 |
| FYTTD1     | 0.032 | 7.654E-01 | 2.185E-01 |
| CDK12      | 0.032 | 7.953E-01 | 6.564E-01 |
| TSPYL2     | 0.032 | 8.645E-01 | 2.283E-01 |
| NAA35      | 0.032 | 7.618E-01 | 2.458E-01 |
| EDDM3B     | 0.032 | NA        | 3.605E-01 |
| MYO1C      | 0.032 | 8.153E-01 | 1.132E-01 |
| KIF1B      | 0.032 | 8.245E-01 | 2.502E-01 |
| GCG        | 0.032 | 9.822E-01 | 3.247E-01 |
| MIR1179    | 0.032 | NA        | 2.001E-01 |
| MIR3921    | 0.032 | NA        | 4.730E-01 |
| MIR4801    | 0.032 | NA        | 6.190E-01 |
| LPGAT1     | 0.032 | 7.970E-01 | 5.004E-01 |
| PLEKHO1    | 0.032 | 9.079E-01 | 2.050E-01 |
| KAT5       | 0.032 | 6.993E-01 | 2.077E-01 |
| IMPAD1     | 0.031 | 7.722E-01 | 3.982E-01 |
| AC099329.3 | 0.031 | 9.388E-01 | 1.461E-01 |
| WNT10A     | 0.031 | 9.512E-01 | 3.116E-01 |
| C2orf81    | 0.031 | 9.013E-01 | 7.680E-01 |
| PIGF       | 0.031 | 7.959E-01 | 7.526E-01 |
| DDX50      | 0.031 | 7.261E-01 | 2.565E-01 |
| DENND6A    | 0.031 | 7.475E-01 | 5.934E-01 |
| GNAI3      | 0.031 | 7.858E-01 | 2.553E-01 |
| PDZD8      | 0.031 | 8.235E-01 | 5.040E-01 |
| ACOT2      | 0.031 | 8.438E-01 | 1.082E-01 |
| EID1       | 0.031 | 7.654E-01 | 7.046E-02 |
| XYLT2      | 0.031 | 7.874E-01 | 3.580E-01 |
| PGK1       | 0.031 | 8.667E-01 | 4.164E-01 |
| POLR3A     | 0.031 | 7.720E-01 | 1.041E-01 |
| TMUB1      | 0.031 | 8.285E-01 | 3.093E-01 |
| NPHP4      | 0.031 | 7.955E-01 | 1.670E-01 |
| NFU1       | 0.031 | 7.559E-01 | 1.760E-01 |
| ZNF180     | 0.031 | 8.092E-01 | 1.562E-01 |
| ERN1       | 0.031 | 8.223E-01 | 1.783E-01 |
| ZNF283     | 0.031 | 8.127E-01 | 1.150E-01 |

|            |       |           |           |
|------------|-------|-----------|-----------|
| EGR1       | 0.031 | 9.248E-01 | 7.459E-01 |
| ZDHHC5     | 0.031 | 6.977E-01 | 5.659E-01 |
| CTU1       | 0.031 | 8.701E-01 | 4.174E-01 |
| TMEM189    | 0.031 | 8.217E-01 | 8.266E-01 |
| SIGLEC7    | 0.031 | 9.380E-01 | 1.851E-01 |
| TRIM50     | 0.031 | 9.475E-01 | 1.967E-01 |
| CAVIN4     | 0.031 | 9.095E-01 | 1.597E-01 |
| UNC45A     | 0.031 | 7.095E-01 | 6.278E-01 |
| RARA       | 0.031 | 8.136E-01 | 6.156E-02 |
| NOD1       | 0.031 | 8.303E-01 | 6.043E-01 |
| RBBP4      | 0.031 | 8.013E-01 | 2.382E-01 |
| RRNAD1     | 0.031 | 8.075E-01 | 1.219E-01 |
| SLC25A42   | 0.031 | 8.672E-01 | 2.247E-01 |
| EFNA5      | 0.031 | 9.174E-01 | 8.097E-01 |
| OR6C75     | 0.031 | NA        | 5.085E-01 |
| AC124312.1 | 0.031 | NA        | 7.667E-01 |
| FAM71A     | 0.031 | 9.761E-01 | 9.797E-01 |
| ZNF587B    | 0.031 | 8.264E-01 | 9.797E-01 |
| COTL1      | 0.031 | 9.004E-01 | 9.797E-01 |
| EME1       | 0.031 | 8.880E-01 | 9.797E-01 |
| CEBPB      | 0.031 | 8.908E-01 | 9.797E-01 |
| NBEAL2     | 0.031 | 8.787E-01 | 9.797E-01 |
| AP1M2      | 0.031 | 8.880E-01 | 9.797E-01 |
| PNO1       | 0.031 | 7.684E-01 | 9.797E-01 |
| MTM1       | 0.030 | 8.315E-01 | 9.797E-01 |
| DYNC1LI2   | 0.030 | 8.552E-01 | 9.797E-01 |
| TKFC       | 0.030 | 8.227E-01 | 9.797E-01 |
| TMEM87B    | 0.030 | 7.955E-01 | 9.797E-01 |
| ZDHHC24    | 0.030 | 8.265E-01 | 3.174E-01 |
| SFRP5      | 0.030 | 9.692E-01 | 2.253E-01 |
| CLCN7      | 0.030 | 7.471E-01 | 2.216E-01 |
| PELO       | 0.030 | 8.168E-01 | 1.842E-01 |
| AL136295.1 | 0.030 | 9.574E-01 | 4.885E-01 |
| ZNF112     | 0.030 | 8.469E-01 | 3.274E-01 |
| FAM118B    | 0.030 | 7.918E-01 | 6.403E-01 |
| MCM6       | 0.030 | 8.638E-01 | 2.742E-01 |
| UBP1       | 0.030 | 7.433E-01 | 9.061E-01 |
| ALDH7A1    | 0.030 | 9.429E-01 | 7.455E-01 |
| INTS5      | 0.030 | 7.805E-01 | 1.814E-01 |
| SF3B3      | 0.030 | 8.041E-01 | 2.637E-01 |
| E2F8       | 0.030 | 9.007E-01 | 2.741E-01 |
| GNAI2      | 0.030 | 8.054E-01 | 7.384E-01 |
| FAM103A1   | 0.030 | 7.396E-01 | 1.913E-01 |
| GNG12      | 0.030 | 8.713E-01 | 1.248E-01 |
| OCM        | 0.030 | 9.380E-01 | 5.405E-01 |
| FST        | 0.030 | 9.495E-01 | 3.160E-01 |
| BAD        | 0.030 | 8.397E-01 | 2.364E-01 |
| HYAL2      | 0.030 | 8.222E-01 | 4.286E-01 |
| MRPL3      | 0.030 | 7.464E-01 | 1.327E-01 |
| BZW2       | 0.030 | 8.328E-01 | 2.154E-02 |



|          |       |           |           |
|----------|-------|-----------|-----------|
| QPCT     | 0.030 | 9.361E-01 | 3.261E-01 |
| DTNBP1   | 0.030 | 8.340E-01 | 1.368E-01 |
| PZP      | 0.030 | 9.518E-01 | 3.662E-01 |
| SNRK     | 0.030 | 7.739E-01 | 7.348E-01 |
| TATDN2   | 0.030 | 8.077E-01 | 5.512E-01 |
| PRPF19   | 0.030 | 7.513E-01 | 3.217E-01 |
| FLII     | 0.030 | 8.016E-01 | 5.790E-01 |
| NRIP1    | 0.030 | 8.925E-01 | 2.310E-01 |
| SPOPL    | 0.030 | 8.141E-01 | 1.895E-01 |
| ARSI     | 0.030 | 9.517E-01 | 4.372E-01 |
| MTUS1    | 0.030 | 8.886E-01 | 3.328E-01 |
| ZNF587   | 0.030 | 8.512E-01 | 4.942E-01 |
| TSEN15   | 0.030 | 8.245E-01 | 5.408E-01 |
| RIOX2    | 0.030 | 8.183E-01 | 4.420E-01 |
| HERPUD1  | 0.030 | 8.545E-01 | 1.709E-01 |
| HIP1     | 0.030 | 8.703E-01 | 6.915E-01 |
| SNF8     | 0.030 | 7.949E-01 | 1.333E-01 |
| FBP2     | 0.030 | 9.487E-01 | 2.866E-01 |
| CHMP1A   | 0.029 | 7.868E-01 | 3.673E-01 |
| KPNA4    | 0.029 | 7.443E-01 | 3.767E-01 |
| GON7     | 0.029 | 8.253E-01 | 1.905E-01 |
| C1orf122 | 0.029 | 8.444E-01 | 2.934E-01 |
| PSME3    | 0.029 | 7.443E-01 | 6.969E-01 |
| DPY19L3  | 0.029 | 8.545E-01 | 2.902E-01 |
| PIEZO1   | 0.029 | 8.711E-01 | 7.040E-01 |
| CLOCK    | 0.029 | 8.242E-01 | 6.123E-01 |
| ZMYM5    | 0.029 | 7.915E-01 | 3.354E-01 |
| STAMBP   | 0.029 | 7.011E-01 | 1.812E-01 |
| LIFR     | 0.029 | 9.370E-01 | 2.091E-01 |
| FAM98A   | 0.029 | 7.764E-01 | 2.067E-01 |
| TEX13A   | 0.029 | NA        | 1.967E-01 |
| NPC1     | 0.029 | 8.759E-01 | 3.676E-01 |
| HIPK1    | 0.029 | 8.124E-01 | 1.434E-01 |
| APPBP2   | 0.029 | 7.856E-01 | 2.625E-01 |
| SLC8A3   | 0.029 | 9.483E-01 | 4.212E-01 |
| TMEM98   | 0.029 | 9.202E-01 | 4.230E-01 |
| NOD2     | 0.029 | 9.428E-01 | 1.410E-01 |
| ZMAT2    | 0.029 | 7.488E-01 | 3.936E-01 |
| MIR4427  | 0.029 | NA        | 5.806E-01 |
| SPATS2   | 0.029 | 8.062E-01 | 9.652E-01 |
| RCAN3    | 0.029 | 8.583E-01 | 9.633E-01 |
| ATAD3A   | 0.029 | 8.512E-01 | 9.629E-01 |
| ABCA1    | 0.029 | 8.880E-01 | 9.610E-01 |
| PHB      | 0.029 | 7.935E-01 | 9.608E-01 |
| VAMP2    | 0.029 | 8.369E-01 | 9.589E-01 |
| CD47     | 0.029 | 8.933E-01 | 7.634E-01 |
| MIR6124  | 0.029 | 9.693E-01 | 1.347E-01 |
| MYOM2    | 0.029 | 9.330E-01 | 3.363E-01 |
| PQLC1    | 0.029 | 8.394E-01 | 9.606E-01 |
| TRAK2    | 0.029 | 8.355E-01 | 5.963E-01 |

|            |       |           |           |
|------------|-------|-----------|-----------|
| NMT2       | 0.029 | 8.998E-01 | 2.990E-01 |
| ZNF134     | 0.029 | 8.369E-01 | 7.337E-01 |
| MIR5584    | 0.029 | NA        | 1.195E-01 |
| MIR107     | 0.029 | NA        | 2.424E-01 |
| MIR526B    | 0.029 | NA        | 6.996E-01 |
| AL163195.3 | 0.029 | NA        | 7.648E-01 |
| LIMS4      | 0.029 | NA        | 3.697E-01 |
| MIR1238    | 0.029 | NA        | 5.524E-01 |
| IPO13      | 0.029 | 7.868E-01 | 1.925E-01 |
| LRIF1      | 0.029 | 8.425E-01 | 2.126E-01 |
| ZNF512B    | 0.029 | 8.602E-01 | 2.250E-01 |
| ATG3       | 0.029 | 7.652E-01 | 2.360E-01 |
| DAPP1      | 0.029 | 9.094E-01 | 1.336E-01 |
| SHF        | 0.029 | 9.246E-01 | 7.142E-01 |
| MYO6       | 0.029 | 8.797E-01 | 2.024E-01 |
| SERPINB6   | 0.029 | 8.770E-01 | 5.026E-01 |
| DOLK       | 0.029 | 8.080E-01 | 2.582E-01 |
| NDUFB2     | 0.029 | 8.269E-01 | 2.052E-01 |
| MSTO1      | 0.029 | 8.270E-01 | 3.850E-01 |
| RPRD1B     | 0.029 | 8.044E-01 | 4.226E-01 |
| ZNF318     | 0.029 | 8.303E-01 | 2.684E-01 |
| PTPDC1     | 0.029 | 8.374E-01 | 7.022E-01 |
| SLC9A8     | 0.028 | 8.282E-01 | 1.247E-01 |
| ZNF274     | 0.028 | 8.528E-01 | 1.559E-01 |
| PIGT       | 0.028 | 8.394E-01 | 5.439E-01 |
| KIF20B     | 0.028 | 8.838E-01 | 5.616E-01 |
| GPR32      | 0.028 | NA        | 1.909E-01 |
| NTN1       | 0.028 | 9.513E-01 | 8.039E-01 |
| PRTN3      | 0.028 | 9.695E-01 | 4.751E-01 |
| GSTA3      | 0.028 | 9.792E-01 | 3.493E-01 |
| SIPA1L2    | 0.028 | 9.113E-01 | 1.385E-01 |
| MIR550A3   | 0.028 | NA        | 2.872E-01 |
| HHIP       | 0.028 | 9.593E-01 | 4.011E-01 |
| STRN4      | 0.028 | 7.558E-01 | 1.823E-01 |
| HNRNPL     | 0.028 | 6.647E-01 | 1.477E-01 |
| ADIG       | 0.028 | 9.728E-01 | 4.077E-01 |
| STK10      | 0.028 | 8.635E-01 | 7.666E-01 |
| AATF       | 0.028 | 7.998E-01 | 6.765E-01 |
| OR2W1      | 0.028 | NA        | 2.153E-01 |
| RNF169     | 0.028 | 8.983E-01 | 3.328E-01 |
| BET1       | 0.028 | 7.644E-01 | 3.922E-01 |
| VAV3       | 0.028 | 9.302E-01 | 9.029E-02 |
| DDX19A     | 0.028 | 7.798E-01 | 4.506E-01 |
| CSRNP3     | 0.028 | 9.344E-01 | 2.825E-01 |
| ATPAF1     | 0.028 | 7.793E-01 | 3.093E-01 |
| MIR4668    | 0.028 | 9.549E-01 | 3.206E-01 |
| CTNBL1     | 0.028 | 8.031E-01 | 2.308E-01 |
| NCK2       | 0.028 | 8.161E-01 | 7.350E-01 |
| PPP3CA     | 0.028 | 8.532E-01 | 6.361E-01 |
| MIR645     | 0.028 | 9.602E-01 | 2.665E-01 |

|           |       |           |           |
|-----------|-------|-----------|-----------|
| TPRA1     | 0.028 | 7.918E-01 | 7.101E-01 |
| TGIF1     | 0.028 | 8.446E-01 | 2.716E-01 |
| DCAF11    | 0.028 | 7.488E-01 | 2.156E-01 |
| MUS81     | 0.028 | 7.826E-01 | 3.278E-01 |
| MRPS10    | 0.028 | 8.204E-01 | 9.001E-01 |
| DNAJC27   | 0.028 | 8.284E-01 | 8.511E-01 |
| MIR4641   | 0.028 | NA        | 7.084E-01 |
| HK1       | 0.028 | 8.448E-01 | 3.065E-01 |
| MIR26A2   | 0.028 | 9.650E-01 | 2.509E-01 |
| UFM1      | 0.028 | 7.904E-01 | 9.804E-01 |
| HIST1H2BI | 0.028 | 9.479E-01 | 9.804E-01 |
| TOP2A     | 0.028 | 9.043E-01 | 9.804E-01 |
| PMCH      | 0.028 | 9.474E-01 | 9.804E-01 |
| KIAA1107  | 0.028 | 8.854E-01 | 9.804E-01 |
| WNK2      | 0.028 | 9.483E-01 | 9.804E-01 |
| IVNS1ABP  | 0.028 | 8.599E-01 | 9.804E-01 |
| PEX12     | 0.028 | 8.235E-01 | 9.804E-01 |
| ZNF174    | 0.027 | 7.541E-01 | 9.804E-01 |
| LAMB1     | 0.027 | 8.835E-01 | 9.804E-01 |
| HSD17B12  | 0.027 | 8.352E-01 | 9.804E-01 |
| NOL9      | 0.027 | 7.827E-01 | 9.804E-01 |
| NR1H2     | 0.027 | 7.979E-01 | 9.804E-01 |
| POLH      | 0.027 | 8.727E-01 | 9.804E-01 |
| GTF2IRD1  | 0.027 | 8.472E-01 | 9.804E-01 |
| SERINC4   | 0.027 | NA        | 9.804E-01 |
| ATP2A1    | 0.027 | 9.170E-01 | 9.804E-01 |
| CCDC51    | 0.027 | 8.421E-01 | 9.804E-01 |
| ABCB9     | 0.027 | 8.694E-01 | 9.804E-01 |
| FDFT1     | 0.027 | 8.940E-01 | 9.804E-01 |
| KRTAP5-3  | 0.027 | NA        | 9.804E-01 |
| KCTD20    | 0.027 | 7.939E-01 | 9.804E-01 |
| RNASEH2A  | 0.027 | 8.692E-01 | 9.804E-01 |
| C17orf47  | 0.027 | 9.460E-01 | 9.804E-01 |
| EYA4      | 0.027 | 9.529E-01 | 9.804E-01 |
| PRKAR1A   | 0.027 | 7.696E-01 | 9.804E-01 |
| OSBPL11   | 0.027 | 8.318E-01 | 9.804E-01 |
| FH        | 0.027 | 8.015E-01 | 9.804E-01 |
| SLC22A3   | 0.027 | 9.587E-01 | 9.804E-01 |
| GUCA1A    | 0.027 | 9.630E-01 | 9.804E-01 |
| SPCS1     | 0.027 | 8.695E-01 | 9.804E-01 |
| TXNDC15   | 0.027 | 8.055E-01 | 9.804E-01 |
| CTAGE4    | 0.027 | 9.480E-01 | 9.804E-01 |
| FBXL3     | 0.027 | 8.232E-01 | 2.984E-01 |
| CBARP     | 0.027 | 9.229E-01 | 4.595E-01 |
| BIRC5     | 0.027 | 9.079E-01 | 2.899E-01 |
| PAAF1     | 0.027 | 8.450E-01 | 3.567E-01 |
| ZNF672    | 0.027 | 7.962E-01 | 3.888E-01 |
| TMEM165   | 0.027 | 8.383E-01 | 1.647E-01 |
| RELB      | 0.027 | 8.979E-01 | 3.159E-01 |
| LRRC74B   | 0.027 | 9.631E-01 | 6.491E-01 |

|           |       |           |           |
|-----------|-------|-----------|-----------|
| COPS7A    | 0.027 | 7.609E-01 | 2.259E-01 |
| MEMO1     | 0.027 | 8.071E-01 | 2.940E-01 |
| RNF128    | 0.027 | 9.521E-01 | 9.249E-01 |
| MS4A7     | 0.027 | 9.442E-01 | 4.621E-01 |
| RUFY1     | 0.027 | 7.865E-01 | 1.894E-01 |
| ZNF732    | 0.027 | 9.580E-01 | 1.323E-01 |
| MANBAL    | 0.027 | 8.057E-01 | 7.326E-01 |
| TRAF2     | 0.027 | 8.632E-01 | 5.500E-01 |
| CAMK2D    | 0.026 | 8.889E-01 | 2.027E-01 |
| PDGFA     | 0.026 | 9.205E-01 | 9.441E-01 |
| C21orf59  | 0.026 | 8.520E-01 | 3.734E-01 |
| TMEM268   | 0.026 | 8.386E-01 | 2.512E-01 |
| RAD51     | 0.026 | 8.879E-01 | 8.930E-01 |
| SUMO3     | 0.026 | 8.288E-01 | 2.999E-01 |
| LSM14B    | 0.026 | 8.107E-01 | 6.617E-01 |
| DNAJC10   | 0.026 | 8.570E-01 | 1.558E-01 |
| TRDMT1    | 0.026 | 9.009E-01 | 1.850E-01 |
| FUT1      | 0.026 | 9.074E-01 | 2.649E-01 |
| TM6SF2    | 0.026 | 9.457E-01 | 2.599E-01 |
| AMDHD2    | 0.026 | 8.667E-01 | 1.624E-01 |
| KPNB1     | 0.026 | 7.858E-01 | 3.116E-01 |
| PUM3      | 0.026 | 8.729E-01 | 5.989E-01 |
| UFL1      | 0.026 | 8.596E-01 | 6.627E-01 |
| TOR2A     | 0.026 | 8.369E-01 | 2.119E-01 |
| CHST12    | 0.026 | 8.765E-01 | 4.196E-01 |
| GYG1      | 0.026 | 8.306E-01 | 9.066E-01 |
| SLC39A14  | 0.026 | 9.169E-01 | 4.124E-01 |
| SCML1     | 0.026 | 9.168E-01 | 3.319E-01 |
| VPS11     | 0.026 | 7.903E-01 | 4.164E-01 |
| MPRIIP    | 0.026 | 8.693E-01 | 3.323E-01 |
| PLEKHA4   | 0.026 | 9.295E-01 | 2.525E-01 |
| BICDL2    | 0.026 | 9.457E-01 | 2.280E-01 |
| IFT88     | 0.026 | 8.403E-01 | 6.682E-01 |
| INCENP    | 0.026 | 8.846E-01 | 2.171E-01 |
| GORASP2   | 0.026 | 7.442E-01 | 6.105E-01 |
| ZNF471    | 0.026 | 9.475E-01 | 1.867E-01 |
| KRTAP24-1 | 0.026 | NA        | 1.930E-01 |
| MIR549A   | 0.026 | NA        | 4.009E-01 |
| IFNA17    | 0.026 | NA        | 1.712E-01 |
| OR2M3     | 0.026 | NA        | 6.768E-01 |
| VCY       | 0.026 | NA        | 2.481E-01 |
| MIR4789   | 0.026 | NA        | 3.521E-01 |
| CMC4      | 0.026 | NA        | 4.657E-01 |
| JOSD1     | 0.026 | 8.153E-01 | 8.709E-01 |
| FDX1      | 0.026 | 8.815E-01 | 7.216E-01 |
| XRN1      | 0.026 | 8.486E-01 | 1.036E-01 |
| PLLP      | 0.026 | 9.391E-01 | 1.690E-01 |
| FAM168B   | 0.026 | 8.446E-01 | 4.509E-01 |
| PCGF6     | 0.026 | 8.298E-01 | 1.884E-01 |
| KIF3B     | 0.026 | 8.424E-01 | 6.739E-01 |

|            |       |           |           |
|------------|-------|-----------|-----------|
| ZFP90      | 0.026 | 8.421E-01 | 6.501E-01 |
| IKBKG      | 0.026 | 8.502E-01 | 5.765E-01 |
| MIPEP      | 0.026 | 8.425E-01 | 1.470E-01 |
| CUEDC2     | 0.026 | 8.463E-01 | 9.715E-01 |
| KLK14      | 0.026 | 9.620E-01 | 9.714E-01 |
| NONO       | 0.026 | 8.053E-01 | 9.714E-01 |
| UNC80      | 0.026 | 9.578E-01 | 9.671E-01 |
| METTL2A    | 0.026 | 7.970E-01 | 9.669E-01 |
| SRP54      | 0.026 | 8.041E-01 | 4.863E-01 |
| ARFGAP1    | 0.026 | 8.448E-01 | 7.708E-01 |
| AGAP1      | 0.026 | 8.631E-01 | 2.908E-01 |
| RNF121     | 0.026 | 8.165E-01 | 4.513E-01 |
| CMC1       | 0.026 | 8.207E-01 | 7.897E-01 |
| FTO        | 0.026 | 8.278E-01 | 3.250E-01 |
| SLC37A4    | 0.026 | 8.655E-01 | 2.691E-01 |
| KLC3       | 0.026 | 9.502E-01 | 7.795E-01 |
| IFI27L1    | 0.026 | 9.117E-01 | 4.650E-01 |
| S100A5     | 0.026 | 9.547E-01 | 8.196E-02 |
| HCFC2      | 0.026 | 8.528E-01 | 1.582E-01 |
| COQ8B      | 0.025 | 8.481E-01 | 2.302E-01 |
| SSH2       | 0.025 | 8.344E-01 | 2.509E-01 |
| HSP90AA1   | 0.025 | 8.571E-01 | 1.482E-01 |
| PPM1L      | 0.025 | 9.257E-01 | 6.039E-01 |
| OR2L3      | 0.025 | NA        | 3.038E-01 |
| MIR1271    | 0.025 | NA        | 1.572E-01 |
| MIR30B     | 0.025 | NA        | 2.751E-01 |
| AC010132.3 | 0.025 | 9.481E-01 | 3.233E-01 |
| DVL2       | 0.025 | 8.402E-01 | 6.288E-01 |
| ARNTL2     | 0.025 | 9.326E-01 | 5.970E-01 |
| AC008878.2 | 0.025 | 9.680E-01 | 5.792E-01 |
| TMEM185A   | 0.025 | 8.404E-01 | 4.517E-01 |
| TINF2      | 0.025 | 8.167E-01 | 2.516E-01 |
| ANKIB1     | 0.025 | 8.249E-01 | 1.490E-01 |
| KLHL11     | 0.025 | 9.296E-01 | 3.022E-01 |
| GLT8D1     | 0.025 | 8.545E-01 | 6.406E-01 |
| CTSO       | 0.025 | 9.049E-01 | 4.380E-01 |
| CCDC13     | 0.025 | 9.251E-01 | 3.612E-01 |
| CCNYL1     | 0.025 | 9.005E-01 | 7.469E-01 |
| CCDC189    | 0.025 | 9.113E-01 | 9.247E-01 |
| PPP6C      | 0.025 | 7.715E-01 | 5.687E-01 |
| GJB7       | 0.025 | 9.555E-01 | 7.394E-01 |
| TMLHE      | 0.025 | 8.584E-01 | 5.979E-01 |
| BORCS7     | 0.025 | 8.402E-01 | 1.608E-01 |
| ADRA2C     | 0.025 | 9.641E-01 | 2.304E-01 |
| TAF11      | 0.025 | 7.941E-01 | 2.035E-01 |
| LINC00094  | 0.025 | 8.533E-01 | 5.937E-01 |
| VWF        | 0.025 | 9.192E-01 | 9.286E-01 |
| ZNF438     | 0.025 | 8.794E-01 | 2.716E-01 |
| CYB561A3   | 0.025 | 8.570E-01 | 1.224E-01 |
| TSSC1      | 0.025 | 8.177E-01 | 2.606E-01 |

|            |       |           |           |
|------------|-------|-----------|-----------|
| COPB1      | 0.025 | 8.038E-01 | 4.005E-01 |
| EEF2K      | 0.025 | 8.514E-01 | 3.414E-01 |
| IFITM3     | 0.025 | 9.423E-01 | 2.277E-01 |
| ANKRD9     | 0.025 | 8.964E-01 | 2.938E-01 |
| PDCL2      | 0.025 | 9.770E-01 | 1.437E-01 |
| TSPAN11    | 0.025 | 9.443E-01 | 4.436E-01 |
| ADPRHL2    | 0.025 | 7.941E-01 | 3.033E-01 |
| VPS35      | 0.025 | 8.381E-01 | 4.133E-01 |
| CLEC4G     | 0.025 | 9.666E-01 | 1.395E-01 |
| EHD4       | 0.025 | 8.667E-01 | 3.388E-01 |
| PMM1       | 0.025 | 8.645E-01 | 2.048E-01 |
| UGGT1      | 0.025 | 8.416E-01 | 4.718E-01 |
| NEDD9      | 0.025 | 9.344E-01 | 6.392E-01 |
| VMP1       | 0.025 | 8.755E-01 | 4.893E-01 |
| ZNF71      | 0.025 | 9.146E-01 | 8.500E-01 |
| MIR5697    | 0.025 | NA        | 2.340E-01 |
| SLC25A39   | 0.025 | 8.469E-01 | 2.856E-01 |
| MIR3912    | 0.024 | NA        | 7.277E-01 |
| ATG13      | 0.024 | 8.469E-01 | 4.828E-01 |
| CYP4B1     | 0.024 | 9.679E-01 | 2.981E-01 |
| C5orf51    | 0.024 | 8.404E-01 | 7.143E-01 |
| SECISBP2   | 0.024 | 8.369E-01 | 3.894E-01 |
| FOXO3      | 0.024 | 8.632E-01 | 7.739E-01 |
| CSTB       | 0.024 | 9.213E-01 | 2.517E-01 |
| RASSF4     | 0.024 | 9.395E-01 | 2.625E-01 |
| MIR3189    | 0.024 | 9.680E-01 | 2.850E-01 |
| SEC14L1    | 0.024 | 8.535E-01 | 2.638E-01 |
| DNAAF3     | 0.024 | 9.489E-01 | 1.653E-01 |
| NDST2      | 0.024 | 8.356E-01 | 5.609E-01 |
| AGK        | 0.024 | 8.044E-01 | 3.702E-01 |
| SLC35E4    | 0.024 | 9.138E-01 | 3.828E-01 |
| CLTA       | 0.024 | 8.693E-01 | 7.381E-01 |
| IER3IP1    | 0.024 | 8.381E-01 | 3.767E-01 |
| FADD       | 0.024 | 9.013E-01 | 2.478E-01 |
| PRPF3      | 0.024 | 8.539E-01 | 4.207E-01 |
| SAV1       | 0.024 | 8.620E-01 | 1.752E-01 |
| TXNDC5     | 0.024 | 9.133E-01 | 8.405E-01 |
| TRMT6      | 0.024 | 8.438E-01 | 2.852E-01 |
| PVRIG      | 0.024 | 9.310E-01 | 2.510E-01 |
| C18orf25   | 0.024 | 8.480E-01 | 7.601E-01 |
| TCEAL6     | 0.024 | 9.721E-01 | 1.987E-01 |
| SUV39H1    | 0.024 | 8.903E-01 | 2.809E-01 |
| AL121845.3 | 0.024 | 9.020E-01 | 5.030E-01 |
| H3F3B      | 0.024 | 8.224E-01 | 9.586E-01 |
| AFG3L2     | 0.024 | 8.534E-01 | 9.481E-01 |
| PROM2      | 0.024 | 9.452E-01 | 5.154E-01 |
| RAB33A     | 0.024 | 9.380E-01 | 4.944E-01 |
| STAC3      | 0.024 | 9.205E-01 | 3.510E-01 |
| ATF7       | 0.024 | 7.867E-01 | 8.862E-01 |
| CEBPD      | 0.024 | 9.193E-01 | 7.855E-01 |

|            |       |           |           |
|------------|-------|-----------|-----------|
| HSPBP1     | 0.024 | 8.799E-01 | 3.600E-01 |
| NSMCE1     | 0.024 | 8.735E-01 | 5.832E-01 |
| CLIC2      | 0.024 | 9.334E-01 | 6.045E-01 |
| TIMM22     | 0.024 | 8.421E-01 | 1.386E-01 |
| MKI67      | 0.024 | 9.153E-01 | 3.032E-01 |
| ENO1       | 0.024 | 8.880E-01 | 8.813E-01 |
| TMEM35B    | 0.024 | 8.786E-01 | 5.094E-01 |
| UIMC1      | 0.024 | 7.976E-01 | 4.098E-01 |
| CDK2AP2    | 0.024 | 8.806E-01 | 4.791E-01 |
| METTL9     | 0.024 | 8.164E-01 | 2.431E-01 |
| MILR1      | 0.024 | 9.482E-01 | 1.476E-01 |
| MINDY4     | 0.024 | 9.105E-01 | 3.920E-01 |
| XPO1       | 0.024 | 7.993E-01 | 4.033E-01 |
| LCLAT1     | 0.024 | 8.587E-01 | 2.351E-01 |
| AC104532.1 | 0.023 | 9.545E-01 | 2.109E-01 |
| SEC61B     | 0.023 | 8.574E-01 | 1.772E-01 |
| ZNF92      | 0.023 | 8.965E-01 | 4.861E-01 |
| NBPF15     | 0.023 | 9.100E-01 | 8.195E-01 |
| UTP18      | 0.023 | 8.399E-01 | 6.596E-01 |
| NEURL1     | 0.023 | 9.606E-01 | 2.874E-01 |
| TFAP2D     | 0.023 | NA        | 3.486E-01 |
| ADNP       | 0.023 | 8.261E-01 | 7.001E-01 |
| TEX38      | 0.023 | 9.380E-01 | 4.418E-01 |
| POLR3GL    | 0.023 | 8.635E-01 | 1.847E-01 |
| MIR4650-1  | 0.023 | NA        | 1.607E-01 |
| AC008758.1 | 0.023 | NA        | 2.330E-01 |
| T5C1B-RDH1 | 0.023 | NA        | 2.373E-01 |
| MIR6504    | 0.023 | NA        | 8.906E-01 |
| OR6K6      | 0.023 | NA        | 5.717E-01 |
| MIR4684    | 0.023 | NA        | 3.240E-01 |
| OR10A7     | 0.023 | NA        | 7.301E-01 |
| MIR103A1   | 0.023 | NA        | 2.178E-01 |
| RAB13      | 0.023 | 8.621E-01 | 5.178E-01 |
| WDR63      | 0.023 | 9.495E-01 | 4.604E-01 |
| ACSL3      | 0.023 | 8.810E-01 | 4.042E-01 |
| ISOC2      | 0.023 | 8.931E-01 | 8.570E-01 |
| SKA3       | 0.023 | 9.092E-01 | 3.127E-01 |
| ZNF556     | 0.023 | 9.695E-01 | 2.270E-01 |
| CHRNA4     | 0.023 | 9.576E-01 | 2.937E-01 |
| LRRC36     | 0.023 | 9.579E-01 | 6.138E-01 |
| EIF1AX     | 0.023 | 8.413E-01 | 4.441E-01 |
| LHX6       | 0.023 | 9.331E-01 | 9.771E-01 |
| MIR30C2    | 0.023 | 9.783E-01 | 9.770E-01 |
| UBQLN1     | 0.023 | 8.512E-01 | 9.769E-01 |
| TRIO       | 0.023 | 8.937E-01 | 9.750E-01 |
| VN1R1      | 0.023 | 9.298E-01 | 9.749E-01 |
| RCN2       | 0.023 | 8.561E-01 | 9.747E-01 |
| CPNE3      | 0.023 | 8.791E-01 | 9.728E-01 |
| RINT1      | 0.023 | 8.276E-01 | 4.656E-02 |
| EMC6       | 0.023 | 8.876E-01 | 8.156E-01 |

|            |       |           |           |
|------------|-------|-----------|-----------|
| RIN3       | 0.023 | 9.092E-01 | 8.324E-01 |
| SLC4A10    | 0.023 | 9.689E-01 | 5.465E-01 |
| CD34       | 0.023 | 9.230E-01 | 5.327E-01 |
| KSR2       | 0.023 | 9.643E-01 | 4.198E-01 |
| CCT7       | 0.023 | 8.446E-01 | 1.204E-01 |
| EIF3A      | 0.023 | 8.672E-01 | 1.522E-01 |
| ZER1       | 0.023 | 8.199E-01 | 6.376E-01 |
| FAM45A     | 0.023 | 8.325E-01 | 1.943E-01 |
| CLPX       | 0.023 | 8.251E-01 | 5.140E-01 |
| TMEM115    | 0.023 | 8.541E-01 | 2.129E-01 |
| MIR4436A   | 0.023 | NA        | 2.571E-01 |
| OR2AT4     | 0.023 | NA        | 1.899E-01 |
| MIR2278    | 0.023 | NA        | 2.009E-01 |
| SNX10      | 0.023 | 9.379E-01 | 6.036E-01 |
| NRBP2      | 0.023 | 9.107E-01 | 5.800E-01 |
| CHTF8      | 0.023 | 8.278E-01 | 3.321E-01 |
| PPM1K      | 0.023 | 9.210E-01 | 1.653E-01 |
| EI24       | 0.022 | 8.436E-01 | 3.556E-01 |
| C1orf174   | 0.022 | 7.926E-01 | 1.991E-01 |
| IQANK1     | 0.022 | 9.338E-01 | 1.935E-01 |
| MPV17      | 0.022 | 8.491E-01 | 2.305E-01 |
| LPIN1      | 0.022 | 9.207E-01 | 9.335E-01 |
| POTEJ      | 0.022 | 9.529E-01 | 9.397E-01 |
| SKAP2      | 0.022 | 8.815E-01 | 2.275E-01 |
| MAD1L1     | 0.022 | 8.663E-01 | 5.528E-01 |
| CEBPZOS    | 0.022 | 8.526E-01 | 5.801E-01 |
| PUM2       | 0.022 | 8.058E-01 | 2.546E-01 |
| EBF4       | 0.022 | 9.456E-01 | 2.043E-01 |
| PCDHGC4    | 0.022 | 9.587E-01 | 5.867E-01 |
| ENOPH1     | 0.022 | 8.447E-01 | 4.094E-01 |
| PCIF1      | 0.022 | 8.245E-01 | 2.470E-01 |
| TBC1D12    | 0.022 | 8.635E-01 | 8.781E-01 |
| CCDC126    | 0.022 | 8.744E-01 | 2.778E-01 |
| PDGFD      | 0.022 | 9.458E-01 | 8.032E-01 |
| GH1        | 0.022 | 9.760E-01 | 6.784E-01 |
| SMARCC2    | 0.022 | 8.880E-01 | 3.584E-01 |
| OR1K1      | 0.022 | NA        | 7.108E-01 |
| DDRKG1     | 0.022 | 8.735E-01 | 4.618E-01 |
| FBXW9      | 0.022 | 8.693E-01 | 4.074E-01 |
| KAT14      | 0.022 | 8.701E-01 | 9.039E-01 |
| ERICH4     | 0.022 | 9.718E-01 | 6.856E-01 |
| MALSU1     | 0.022 | 8.457E-01 | 4.842E-01 |
| UBE2Z      | 0.022 | 8.183E-01 | 3.173E-01 |
| RNF125     | 0.022 | 9.371E-01 | 3.607E-01 |
| AC093668.1 | 0.022 | NA        | 2.749E-01 |
| RNF214     | 0.022 | 8.194E-01 | 9.522E-01 |
| TP53INP2   | 0.022 | 9.272E-01 | 3.283E-01 |
| ZC4H2      | 0.022 | 9.480E-01 | 6.007E-01 |
| CUL4B      | 0.022 | 8.153E-01 | 3.819E-01 |
| C2orf76    | 0.022 | 8.541E-01 | 1.296E-01 |



|          |       |           |           |
|----------|-------|-----------|-----------|
| EXOSC10  | 0.022 | 7.993E-01 | 2.560E-01 |
| COL4A1   | 0.022 | 9.336E-01 | 9.698E-01 |
| MSL2     | 0.022 | 8.172E-01 | 9.640E-01 |
| MESDC2   | 0.022 | 8.086E-01 | 9.505E-01 |
| ZCWPW1   | 0.022 | 9.177E-01 | 2.412E-01 |
| KIAA1211 | 0.022 | 9.601E-01 | 2.162E-01 |
| ZDHHC3   | 0.022 | 8.735E-01 | 3.549E-01 |
| RAB15    | 0.022 | 9.457E-01 | 2.747E-01 |
| GAPVD1   | 0.022 | 8.454E-01 | 3.427E-01 |
| TP53BP1  | 0.022 | 8.830E-01 | 7.212E-01 |
| DCUN1D1  | 0.022 | 8.533E-01 | 1.522E-01 |
| NDUFAF6  | 0.022 | 8.654E-01 | 2.956E-01 |
| RFWD3    | 0.022 | 8.800E-01 | 4.145E-01 |
| AKT1S1   | 0.022 | 8.514E-01 | 1.425E-01 |
| CRIP1    | 0.022 | 8.517E-01 | 7.787E-01 |
| SRP68    | 0.022 | 7.980E-01 | 4.644E-01 |
| ZNF254   | 0.021 | 9.308E-01 | 5.909E-01 |
| MIR199A1 | 0.021 | 9.711E-01 | 2.657E-01 |
| ARSH     | 0.021 | 9.648E-01 | 7.523E-01 |
| LRPPRC   | 0.021 | 8.540E-01 | 2.644E-01 |
| BCAS2    | 0.021 | 8.242E-01 | 2.272E-01 |
| AP2M1    | 0.021 | 8.369E-01 | 5.040E-01 |
| RASGRP1  | 0.021 | 9.579E-01 | 2.259E-01 |
| PGS1     | 0.021 | 8.324E-01 | 2.916E-01 |
| DLGAP4   | 0.021 | 8.497E-01 | 2.385E-01 |
| PSMC5    | 0.021 | 8.557E-01 | 4.472E-01 |
| ALDH1A2  | 0.021 | 9.616E-01 | 7.794E-01 |
| NSF      | 0.021 | 8.879E-01 | 2.642E-01 |
| GPR180   | 0.021 | 8.830E-01 | 9.302E-01 |
| THAP3    | 0.021 | 8.781E-01 | 2.282E-01 |
| VAMP4    | 0.021 | 8.693E-01 | 2.692E-01 |
| YPEL5    | 0.021 | 8.513E-01 | 3.153E-01 |
| GZF1     | 0.021 | 8.446E-01 | 2.041E-01 |
| IQCB1    | 0.021 | 8.726E-01 | 7.613E-01 |
| DNAJC30  | 0.021 | 8.791E-01 | 2.739E-01 |
| TRAPPC9  | 0.021 | 8.676E-01 | 2.873E-01 |
| AKAP13   | 0.021 | 8.869E-01 | 2.249E-01 |
| SPATA12  | 0.021 | 9.453E-01 | 5.205E-01 |
| ARID5A   | 0.021 | 9.249E-01 | 2.671E-01 |
| TFRC     | 0.021 | 9.394E-01 | 9.223E-01 |
| TEX46    | 0.021 | 9.560E-01 | 3.242E-01 |
| SWT1     | 0.021 | 8.719E-01 | 3.571E-01 |
| MNT      | 0.021 | 8.667E-01 | 5.829E-01 |
| SLC30A7  | 0.021 | 8.302E-01 | 3.163E-01 |
| SCFD2    | 0.021 | 8.520E-01 | 7.472E-01 |
| ZHX2     | 0.021 | 9.004E-01 | 5.662E-01 |
| CROT     | 0.021 | 9.455E-01 | 5.362E-01 |
| UBR7     | 0.021 | 8.755E-01 | 2.066E-01 |
| STK17B   | 0.021 | 9.229E-01 | 1.759E-01 |
| NBN      | 0.021 | 8.784E-01 | 3.720E-01 |

|            |       |           |           |
|------------|-------|-----------|-----------|
| TERF2      | 0.021 | 8.242E-01 | 1.026E-01 |
| SPATC1L    | 0.021 | 9.479E-01 | 9.823E-01 |
| RNF103     | 0.021 | 8.566E-01 | 9.823E-01 |
| DNAH7      | 0.021 | 9.354E-01 | 9.823E-01 |
| MIR548AA1  | 0.021 | 9.604E-01 | 9.823E-01 |
| RNF139     | 0.021 | 8.513E-01 | 9.823E-01 |
| FNBP1L     | 0.021 | 9.208E-01 | 9.809E-01 |
| AMZ2       | 0.021 | 8.361E-01 | 9.804E-01 |
| MIR6880    | 0.021 | NA        | 9.804E-01 |
| OR10G3     | 0.021 | NA        | 9.802E-01 |
| MIR877     | 0.021 | NA        | 9.787E-01 |
| AC120057.3 | 0.021 | NA        | 9.783E-01 |
| OR2M2      | 0.021 | NA        | 5.930E-01 |
| WDR46      | 0.021 | 8.658E-01 | 8.892E-01 |
| KRTAP10-6  | 0.021 | NA        | 3.868E-01 |
| ALAD       | 0.021 | 8.704E-01 | 5.817E-01 |
| SMYD5      | 0.021 | 8.531E-01 | 2.908E-01 |
| GPAA1      | 0.021 | 8.903E-01 | 7.732E-01 |
| AC239799.1 | 0.020 | NA        | 4.191E-01 |
| ERAS       | 0.020 | 9.648E-01 | 3.034E-01 |
| MIR1302-5  | 0.020 | NA        | 3.700E-01 |
| TLN2       | 0.020 | 9.280E-01 | 4.469E-01 |
| MT1B       | 0.020 | 9.858E-01 | 2.138E-01 |
| AAR2       | 0.020 | 8.248E-01 | 3.685E-01 |
| HERPUD2    | 0.020 | 8.054E-01 | 3.745E-01 |
| TAF5L      | 0.020 | 8.355E-01 | 2.969E-01 |
| RECQL      | 0.020 | 9.167E-01 | 2.655E-01 |
| MIR3136    | 0.020 | NA        | 3.087E-01 |
| STUB1      | 0.020 | 8.655E-01 | 7.395E-01 |
| SAMHD1     | 0.020 | 9.404E-01 | 2.467E-01 |
| MPO        | 0.020 | 9.626E-01 | 2.497E-01 |
| ANKRD16    | 0.020 | 8.976E-01 | 7.146E-01 |
| RAE1       | 0.020 | 8.533E-01 | 3.069E-01 |
| TIRAP      | 0.020 | 8.759E-01 | 7.926E-01 |
| SSR1       | 0.020 | 8.673E-01 | 8.805E-01 |
| AP2B1      | 0.020 | 8.815E-01 | 3.314E-01 |
| NCOA4      | 0.020 | 8.784E-01 | 3.306E-01 |
| SARS       | 0.020 | 8.512E-01 | 1.659E-01 |
| SLC6A3     | 0.020 | 9.721E-01 | 1.785E-01 |
| DCLRE1B    | 0.020 | 9.003E-01 | 4.053E-01 |
| BORA       | 0.020 | 9.153E-01 | 3.156E-01 |
| ELMO1      | 0.020 | 9.462E-01 | 1.847E-01 |
| CHMP2A     | 0.020 | 9.015E-01 | 2.454E-01 |
| LACRT      | 0.020 | NA        | 2.636E-01 |
| MBD3L2     | 0.020 | NA        | 2.080E-01 |
| TRIM60     | 0.020 | NA        | 3.855E-01 |
| CNTF       | 0.020 | 9.333E-01 | 2.686E-01 |
| COA5       | 0.020 | 8.786E-01 | 7.427E-01 |
| C14orf28   | 0.020 | 8.844E-01 | 4.832E-01 |
| CYB5D2     | 0.020 | 9.083E-01 | 2.343E-01 |

|               |       |           |           |
|---------------|-------|-----------|-----------|
| APOH          | 0.020 | 9.869E-01 | 3.025E-01 |
| ANOS1         | 0.020 | 9.593E-01 | 5.389E-01 |
| GOLGA3        | 0.020 | 8.421E-01 | 8.219E-01 |
| NOL4L         | 0.020 | 9.297E-01 | 6.384E-02 |
| URB1          | 0.020 | 8.998E-01 | 5.081E-01 |
| PPM1J         | 0.020 | 9.512E-01 | 4.794E-01 |
| ITPRIPL2      | 0.020 | 9.237E-01 | 5.192E-01 |
| AC104581.1    | 0.020 | 9.117E-01 | 2.595E-01 |
| ZFP3          | 0.020 | 9.525E-01 | 5.617E-01 |
| VPS13B        | 0.020 | 9.094E-01 | 9.680E-01 |
| GHITM         | 0.020 | 8.661E-01 | 9.680E-01 |
| BICRAL        | 0.020 | 8.801E-01 | 9.345E-01 |
| FANK1         | 0.020 | 9.326E-01 | 9.638E-01 |
| LDLRAD3       | 0.020 | 9.494E-01 | 9.602E-01 |
| HHATL         | 0.020 | 9.770E-01 | 9.582E-01 |
| RUVBL1        | 0.019 | 8.896E-01 | 7.531E-01 |
| ASB14         | 0.019 | 9.068E-01 | 6.422E-01 |
| TEDDM1        | 0.019 | 9.733E-01 | 2.386E-01 |
| RILPL1        | 0.019 | 8.671E-01 | 2.391E-01 |
| PRPF6         | 0.019 | 8.529E-01 | 2.507E-01 |
| PCDHB9        | 0.019 | 9.538E-01 | 5.674E-01 |
| NUDT16        | 0.019 | 8.608E-01 | 1.576E-01 |
| GPN2          | 0.019 | 8.325E-01 | 5.881E-01 |
| RACGAP1       | 0.019 | 9.221E-01 | 5.401E-01 |
| SSBP3         | 0.019 | 9.107E-01 | 1.703E-01 |
| RPGR          | 0.019 | 8.951E-01 | 2.662E-01 |
| NPDC1         | 0.019 | 9.484E-01 | 2.568E-01 |
| KDELC1        | 0.019 | 9.272E-01 | 2.729E-01 |
| MTFR1L        | 0.019 | 8.783E-01 | 7.053E-01 |
| NFE2L3        | 0.019 | 9.462E-01 | 6.776E-01 |
| SNX11         | 0.019 | 8.579E-01 | 2.403E-01 |
| ZNF496        | 0.019 | 8.807E-01 | 4.309E-01 |
| NUSAP1        | 0.019 | 9.314E-01 | 2.844E-01 |
| MIR4688       | 0.019 | NA        | 2.694E-01 |
| UROD          | 0.019 | 8.772E-01 | 3.394E-01 |
| MDM1          | 0.019 | 9.207E-01 | 2.185E-01 |
| MIR6856       | 0.019 | NA        | 3.066E-01 |
| PCDHGB2       | 0.019 | 9.626E-01 | 5.752E-01 |
| COMMD2        | 0.019 | 8.754E-01 | 2.187E-01 |
| ATXN7L3       | 0.019 | 8.519E-01 | 4.466E-01 |
| MRPL37        | 0.019 | 8.936E-01 | 7.131E-01 |
| IL13RA1       | 0.019 | 9.128E-01 | 3.971E-01 |
| CFAP20        | 0.019 | 8.500E-01 | 2.080E-01 |
| MIR3978       | 0.019 | NA        | 4.609E-01 |
| isa-mir-3119- | 0.019 | NA        | 8.917E-01 |
| MIR1228       | 0.019 | NA        | 5.424E-01 |
| MIR4266       | 0.019 | NA        | 4.186E-01 |
| OR4D2         | 0.019 | NA        | 1.955E-01 |
| OR5D18        | 0.019 | NA        | 1.012E-01 |
| CXorf66       | 0.019 | NA        | 9.252E-01 |

|             |       |           |           |
|-------------|-------|-----------|-----------|
| MIR4422     | 0.019 | NA        | 3.735E-01 |
| MIR518F     | 0.019 | NA        | 4.968E-01 |
| MFRP        | 0.019 | NA        | 7.328E-01 |
| OR4C12      | 0.019 | NA        | 3.378E-01 |
| ALOX5AP     | 0.019 | 9.626E-01 | 2.727E-01 |
| HNRNPR      | 0.019 | 8.472E-01 | 1.826E-01 |
| PDE4B       | 0.019 | 9.582E-01 | 3.186E-01 |
| PARP16      | 0.019 | 8.773E-01 | 3.098E-01 |
| TAF13       | 0.019 | 8.850E-01 | 5.353E-01 |
| PPME1       | 0.019 | 8.858E-01 | 1.297E-01 |
| CL2L2-PABP1 | 0.019 | 9.345E-01 | 8.772E-01 |
| EPB41L5     | 0.019 | 9.127E-01 | 5.169E-01 |
| ATXN2L      | 0.019 | 8.711E-01 | 1.473E-01 |
| FAM208A     | 0.019 | 8.592E-01 | 2.447E-01 |
| KLHL15      | 0.019 | 9.003E-01 | 9.830E-01 |
| UFSP2       | 0.019 | 8.701E-01 | 9.830E-01 |
| ELF2        | 0.019 | 8.533E-01 | 9.830E-01 |
| CNTD1       | 0.018 | 9.347E-01 | 9.830E-01 |
| SCAF1       | 0.018 | 8.532E-01 | 9.830E-01 |
| ST6GALNAC1  | 0.018 | 9.134E-01 | 9.830E-01 |
| AMBRA1      | 0.018 | 8.597E-01 | 9.830E-01 |
| PSMG1       | 0.018 | 9.133E-01 | 9.830E-01 |
| MIR579      | 0.018 | 9.766E-01 | 9.830E-01 |
| XKR8        | 0.018 | 8.799E-01 | 9.830E-01 |
| FAS         | 0.018 | 9.520E-01 | 9.830E-01 |
| LAS1L       | 0.018 | 8.779E-01 | 9.830E-01 |
| ZKSCAN5     | 0.018 | 8.386E-01 | 9.830E-01 |
| NPIP4       | 0.018 | 9.508E-01 | 9.830E-01 |
| C15orf41    | 0.018 | 9.133E-01 | 9.830E-01 |
| SETD6       | 0.018 | 9.019E-01 | 9.830E-01 |
| PRB4        | 0.018 | NA        | 9.830E-01 |
| RNF19B      | 0.018 | 9.272E-01 | 9.830E-01 |
| FBXL5       | 0.018 | 8.799E-01 | 9.830E-01 |
| MTMR12      | 0.018 | 9.040E-01 | 9.830E-01 |
| ECEL1       | 0.018 | 9.759E-01 | 9.830E-01 |
| CCL23       | 0.018 | 9.733E-01 | 9.830E-01 |
| MTRR        | 0.018 | 9.043E-01 | 9.830E-01 |
| TUFM        | 0.018 | 8.890E-01 | 9.830E-01 |
| CEBPG       | 0.018 | 8.908E-01 | 6.428E-01 |
| VDAC3       | 0.018 | 8.972E-01 | 3.097E-01 |
| RAB10       | 0.018 | 8.889E-01 | 2.820E-01 |
| MIR591      | 0.018 | NA        | 2.770E-01 |
| SCGB1D4     | 0.018 | NA        | 4.117E-01 |
| MIR147A     | 0.018 | NA        | 8.607E-01 |
| AC034102.2  | 0.018 | NA        | 3.023E-01 |
| OR8B12      | 0.018 | NA        | 5.548E-01 |
| MIR4771-2   | 0.018 | NA        | 2.655E-01 |
| USP6        | 0.018 | 9.454E-01 | 3.579E-01 |
| PLEKHM3     | 0.018 | 9.296E-01 | 4.152E-01 |
| DROSHA      | 0.018 | 8.986E-01 | 4.183E-01 |

|            |       |           |           |
|------------|-------|-----------|-----------|
| DCLRE1C    | 0.018 | 9.032E-01 | 2.366E-01 |
| AARS2      | 0.018 | 8.791E-01 | 3.873E-01 |
| LRCH2      | 0.018 | 9.626E-01 | 2.352E-01 |
| TMEM14B    | 0.018 | 9.001E-01 | 1.680E-01 |
| TAS2R60    | 0.018 | 9.828E-01 | 4.081E-01 |
| TANGO2     | 0.018 | 8.909E-01 | 2.818E-01 |
| MED27      | 0.018 | 9.033E-01 | 5.999E-01 |
| SPCS2      | 0.018 | 8.645E-01 | 9.444E-01 |
| FOLR3      | 0.018 | 9.789E-01 | 2.777E-01 |
| DLG3       | 0.018 | 9.190E-01 | 2.450E-01 |
| CDK5RAP1   | 0.018 | 8.781E-01 | 7.643E-01 |
| GFM1       | 0.018 | 8.833E-01 | 2.464E-01 |
| ZNF768     | 0.018 | 8.945E-01 | 2.711E-01 |
| IARS       | 0.018 | 9.095E-01 | 6.956E-01 |
| IGSF11     | 0.018 | 9.712E-01 | 2.198E-01 |
| XCL1       | 0.018 | 9.688E-01 | 4.300E-01 |
| NUP85      | 0.017 | 8.693E-01 | 2.192E-01 |
| HIST1H4C   | 0.017 | 9.626E-01 | 3.270E-01 |
| ZNF724     | 0.017 | 9.502E-01 | 1.673E-01 |
| IQGAP3     | 0.017 | 9.418E-01 | 1.333E-01 |
| ZNF534     | 0.017 | 9.734E-01 | 6.232E-01 |
| VPS26A     | 0.017 | 8.735E-01 | 7.673E-01 |
| UBE2R2     | 0.017 | 8.815E-01 | 6.734E-01 |
| MRE11      | 0.017 | 8.807E-01 | 3.051E-01 |
| PURB       | 0.017 | 8.571E-01 | 6.149E-01 |
| ZNF264     | 0.017 | 8.940E-01 | 3.269E-01 |
| NIPSNAP2   | 0.017 | 9.105E-01 | 3.954E-01 |
| LSM12      | 0.017 | 8.791E-01 | 6.712E-01 |
| AP2A2      | 0.017 | 8.786E-01 | 8.224E-01 |
| TUSC1      | 0.017 | 9.418E-01 | 3.426E-01 |
| CCDC163    | 0.017 | 9.420E-01 | 2.880E-01 |
| ENO2       | 0.017 | 9.579E-01 | 4.590E-01 |
| DAOA       | 0.017 | NA        | 4.801E-01 |
| SOX18      | 0.017 | 9.508E-01 | 2.081E-01 |
| MRPL35     | 0.017 | 8.423E-01 | 3.125E-01 |
| HLTF       | 0.017 | 9.170E-01 | 6.062E-01 |
| KLHL22     | 0.017 | 9.110E-01 | 6.009E-01 |
| ST8SIA1    | 0.017 | 9.647E-01 | 3.240E-01 |
| RRP1B      | 0.017 | 9.002E-01 | 4.304E-01 |
| SNX30      | 0.017 | 9.151E-01 | 9.104E-01 |
| POLR3K     | 0.017 | 8.993E-01 | 4.993E-01 |
| JAK1       | 0.017 | 8.983E-01 | 9.492E-02 |
| POLR2L     | 0.017 | 9.192E-01 | 3.600E-01 |
| CELF1      | 0.017 | 8.312E-01 | 4.289E-01 |
| PROSER1    | 0.017 | 9.132E-01 | 4.209E-01 |
| AC024270.1 | 0.017 | 9.423E-01 | 4.733E-01 |
| OCM2       | 0.017 | NA        | 3.419E-01 |
| LAPTM4B    | 0.017 | 9.435E-01 | 5.143E-01 |
| NDUFB6     | 0.017 | 9.137E-01 | 2.117E-01 |
| BPNT1      | 0.017 | 8.983E-01 | 2.940E-01 |

|            |       |           |           |
|------------|-------|-----------|-----------|
| LRRRC70    | 0.017 | 9.508E-01 | 2.934E-01 |
| MARS       | 0.017 | 8.728E-01 | 7.180E-01 |
| ARMC7      | 0.017 | 9.128E-01 | 6.022E-01 |
| LEMD3      | 0.017 | 9.033E-01 | 2.788E-01 |
| PNPLA3     | 0.017 | 9.747E-01 | 2.432E-01 |
| ENPP6      | 0.017 | 9.721E-01 | 3.096E-01 |
| SUPT4H1    | 0.017 | 8.671E-01 | 6.806E-01 |
| LYSMD3     | 0.017 | 8.933E-01 | 3.409E-01 |
| C1orf27    | 0.017 | 8.869E-01 | 3.473E-01 |
| DHX38      | 0.017 | 8.841E-01 | 2.070E-01 |
| NEK5       | 0.017 | 9.524E-01 | 3.447E-01 |
| ZNF548     | 0.017 | 9.078E-01 | 9.806E-01 |
| ZNF35      | 0.017 | 8.901E-01 | 9.749E-01 |
| LIN54      | 0.017 | 8.880E-01 | 9.657E-01 |
| ARL13B     | 0.016 | 9.237E-01 | 9.637E-01 |
| FTSJ3      | 0.016 | 8.831E-01 | 4.601E-01 |
| KIF3A      | 0.016 | 9.092E-01 | 3.015E-01 |
| GNMT       | 0.016 | 9.579E-01 | 2.302E-01 |
| XRRA1      | 0.016 | 9.320E-01 | 3.156E-01 |
| SDE2       | 0.016 | 9.042E-01 | 6.738E-01 |
| DHRX       | 0.016 | 9.208E-01 | 3.337E-01 |
| MRPS24     | 0.016 | 9.120E-01 | 3.274E-01 |
| FAM114A2   | 0.016 | 8.604E-01 | 1.823E-01 |
| TOM1L1     | 0.016 | 9.334E-01 | 1.732E-01 |
| GALNT11    | 0.016 | 9.138E-01 | 3.141E-01 |
| STARD3NL   | 0.016 | 9.056E-01 | 2.159E-01 |
| GINS1      | 0.016 | 9.369E-01 | 7.884E-01 |
| AC011462.1 | 0.016 | 9.725E-01 | 5.145E-01 |
| ARPP21     | 0.016 | 9.882E-01 | 7.270E-01 |
| ATXN7      | 0.016 | 9.152E-01 | 2.519E-01 |
| ZNF808     | 0.016 | 9.100E-01 | 2.488E-01 |
| UBAP2      | 0.016 | 9.026E-01 | 2.880E-01 |
| MIR1291    | 0.016 | 9.692E-01 | 3.291E-01 |
| ARFRP1     | 0.016 | 9.128E-01 | 6.284E-01 |
| MOGS       | 0.016 | 8.853E-01 | 5.700E-01 |
| RRP1       | 0.016 | 9.245E-01 | 1.730E-01 |
| HLA-DRB5   | 0.016 | 9.721E-01 | 4.521E-01 |
| MIR4759    | 0.016 | NA        | 4.319E-01 |
| MIR4464    | 0.016 | NA        | 6.790E-01 |
| MIR4695    | 0.016 | NA        | 2.804E-01 |
| MIR548B    | 0.016 | NA        | 4.787E-01 |
| MIR548H3   | 0.016 | NA        | 5.469E-01 |
| MIR583     | 0.016 | NA        | 3.888E-01 |
| MIR2115    | 0.016 | NA        | 1.745E-01 |
| MBD3L5     | 0.016 | NA        | 6.904E-01 |
| MIR1200    | 0.016 | NA        | 9.354E-01 |
| MIR1343    | 0.016 | NA        | 4.356E-01 |
| MIR4299    | 0.016 | NA        | 6.976E-01 |
| MEIS1      | 0.016 | 9.460E-01 | 5.058E-01 |
| RLIM       | 0.016 | 8.853E-01 | 2.903E-01 |

|              |       |           |           |
|--------------|-------|-----------|-----------|
| STX4         | 0.016 | 8.903E-01 | 2.665E-01 |
| MIR6865      | 0.016 | 9.840E-01 | 1.271E-01 |
| ITPR2        | 0.016 | 9.418E-01 | 4.530E-01 |
| BANP         | 0.016 | 8.731E-01 | 5.469E-01 |
| HEATR5B      | 0.016 | 9.070E-01 | 2.672E-01 |
| MIR548AY     | 0.016 | NA        | 3.249E-01 |
| ADAL         | 0.016 | 9.188E-01 | 4.120E-01 |
| RHBDF2       | 0.016 | 9.292E-01 | 3.030E-01 |
| PCDHGA11     | 0.016 | 9.548E-01 | 3.287E-01 |
| SLAIN2       | 0.016 | 8.831E-01 | 7.601E-01 |
| PSMB2        | 0.016 | 8.858E-01 | 4.751E-01 |
| TRMT12       | 0.016 | 9.151E-01 | 7.446E-01 |
| TARBP1       | 0.016 | 9.272E-01 | 4.590E-01 |
| MOCS3        | 0.016 | 8.999E-01 | 9.838E-01 |
| LRRC28       | 0.016 | 8.880E-01 | 9.838E-01 |
| NPIP5        | 0.016 | 9.640E-01 | 9.838E-01 |
| SH3PXD2A     | 0.016 | 9.431E-01 | 9.838E-01 |
| OSER1        | 0.016 | 9.110E-01 | 9.838E-01 |
| PTPRO        | 0.016 | 9.640E-01 | 9.838E-01 |
| NELFB        | 0.016 | 9.060E-01 | 9.838E-01 |
| MBD4         | 0.016 | 8.781E-01 | 9.838E-01 |
| C7orf50      | 0.016 | 9.270E-01 | 9.838E-01 |
| RHOQ         | 0.016 | 9.202E-01 | 9.838E-01 |
| AC026464.4   | 0.016 | 9.748E-01 | 9.838E-01 |
| FBXO42       | 0.016 | 8.329E-01 | 9.838E-01 |
| SLC22A9      | 0.016 | 9.811E-01 | 9.838E-01 |
| OR52E5       | 0.016 | NA        | 9.838E-01 |
| LIMS3        | 0.015 | NA        | 9.838E-01 |
| MTPAP        | 0.015 | 8.914E-01 | 9.838E-01 |
| PL17-C18orf2 | 0.015 | 9.770E-01 | 9.838E-01 |
| DSCC1        | 0.015 | 9.479E-01 | 9.838E-01 |
| C1orf106     | 0.015 | 9.579E-01 | 9.838E-01 |
| SBNO2        | 0.015 | 9.213E-01 | 9.838E-01 |
| FUBP3        | 0.015 | 8.882E-01 | 9.838E-01 |
| MYLK2        | 0.015 | 9.587E-01 | 9.838E-01 |
| RMND5A       | 0.015 | 9.121E-01 | 9.838E-01 |
| KDM7A        | 0.015 | 9.435E-01 | 9.838E-01 |
| BRD3         | 0.015 | 9.213E-01 | 9.838E-01 |
| SDC2         | 0.015 | 9.635E-01 | 9.838E-01 |
| SSBP2        | 0.015 | 9.517E-01 | 9.838E-01 |
| ZNF385B      | 0.015 | 9.824E-01 | 9.838E-01 |
| TMEM170A     | 0.015 | 9.058E-01 | 9.838E-01 |
| ARFIP1       | 0.015 | 9.051E-01 | 9.838E-01 |
| PRELID3B     | 0.015 | 9.105E-01 | 9.838E-01 |
| LMLN         | 0.015 | 9.280E-01 | 9.838E-01 |
| SHANK2       | 0.015 | 9.663E-01 | 9.838E-01 |
| ERI1         | 0.015 | 9.270E-01 | 9.838E-01 |
| FXR1         | 0.015 | 8.867E-01 | 9.838E-01 |
| RAB14        | 0.015 | 8.890E-01 | 9.838E-01 |
| INTS2        | 0.015 | 9.207E-01 | 9.838E-01 |

|            |       |           |           |
|------------|-------|-----------|-----------|
| ASPM       | 0.015 | 9.567E-01 | 9.838E-01 |
| RASL11B    | 0.015 | 9.729E-01 | 9.838E-01 |
| ITGAM      | 0.015 | 9.714E-01 | 9.838E-01 |
| BSDC1      | 0.015 | 8.635E-01 | 9.838E-01 |
| PIM2       | 0.015 | 9.587E-01 | 9.838E-01 |
| DDX6       | 0.015 | 8.746E-01 | 9.838E-01 |
| RAB2A      | 0.015 | 8.898E-01 | 9.838E-01 |
| UEVLD      | 0.015 | 8.997E-01 | 9.838E-01 |
| NOL11      | 0.015 | 8.853E-01 | 9.838E-01 |
| ZNF775     | 0.014 | 9.345E-01 | 9.838E-01 |
| SLC39A9    | 0.014 | 8.829E-01 | 9.838E-01 |
| TSNAX      | 0.014 | 8.879E-01 | 9.838E-01 |
| RBM14-RBM1 | 0.014 | 9.150E-01 | 9.838E-01 |
| SUV39H2    | 0.014 | 9.203E-01 | 9.838E-01 |
| ISG20L2    | 0.014 | 8.868E-01 | 9.838E-01 |
| EPB41L3    | 0.014 | 9.709E-01 | 9.838E-01 |
| TNKS2      | 0.014 | 9.174E-01 | 9.838E-01 |
| FBXO36     | 0.014 | 9.448E-01 | 8.353E-01 |
| TEAD3      | 0.014 | 9.321E-01 | 4.117E-01 |
| CCNI       | 0.014 | 9.033E-01 | 6.139E-01 |
| SMC5       | 0.014 | 9.128E-01 | 1.104E-01 |
| ENKD1      | 0.014 | 9.494E-01 | 4.674E-01 |
| PRCC       | 0.014 | 8.880E-01 | 3.005E-01 |
| OLFM2      | 0.014 | 9.718E-01 | 4.475E-01 |
| RAB40AL    | 0.014 | 9.683E-01 | 4.003E-01 |
| C11orf84   | 0.014 | 9.159E-01 | 2.002E-01 |
| WWP2       | 0.014 | 9.010E-01 | 4.277E-01 |
| ZFAND6     | 0.014 | 8.759E-01 | 3.099E-01 |
| DCUN1D3    | 0.014 | 9.238E-01 | 4.891E-01 |
| PSKH1      | 0.014 | 9.261E-01 | 2.808E-01 |
| ZNF33A     | 0.014 | 9.246E-01 | 2.153E-01 |
| WDR48      | 0.014 | 9.116E-01 | 9.699E-01 |
| NUB1       | 0.014 | 9.132E-01 | 9.609E-01 |
| SELENOH    | 0.014 | 9.273E-01 | 3.407E-01 |
| FLCN       | 0.014 | 9.164E-01 | 4.521E-01 |
| METTL7A    | 0.014 | 9.709E-01 | 3.990E-01 |
| TGFBRAP1   | 0.014 | 8.815E-01 | 3.985E-01 |
| CUL7       | 0.014 | 9.246E-01 | 4.778E-01 |
| DHX9       | 0.014 | 8.828E-01 | 3.231E-01 |
| SUMO4      | 0.014 | 9.650E-01 | 3.205E-01 |
| FOXK2      | 0.014 | 8.797E-01 | 4.628E-01 |
| MIR1273E   | 0.014 | NA        | 2.526E-01 |
| MIR6768    | 0.014 | 9.845E-01 | 3.851E-01 |
| FKBPL      | 0.014 | 9.369E-01 | 4.937E-01 |
| NAP1L2     | 0.014 | 9.736E-01 | 4.788E-01 |
| ORAI1      | 0.014 | 9.391E-01 | 3.186E-01 |
| ZNF366     | 0.014 | 9.650E-01 | 2.342E-01 |
| ACTL6A     | 0.014 | 9.144E-01 | 3.242E-01 |
| GPR148     | 0.014 | NA        | 2.280E-01 |
| CHD6       | 0.014 | 9.361E-01 | 7.564E-01 |



|            |       |           |           |
|------------|-------|-----------|-----------|
| TXNL4A     | 0.014 | 9.152E-01 | 7.825E-01 |
| MINOS1     | 0.014 | 9.146E-01 | 7.037E-01 |
| FAM110A    | 0.014 | 9.359E-01 | 3.618E-01 |
| KLHL24     | 0.014 | 9.414E-01 | 6.963E-01 |
| COG1       | 0.014 | 8.784E-01 | 5.251E-01 |
| ZNF439     | 0.014 | 9.684E-01 | 3.603E-01 |
| SQOR       | 0.014 | 9.579E-01 | 4.611E-01 |
| AC055811.2 | 0.014 | 9.718E-01 | 7.788E-01 |
| DIS3L      | 0.014 | 9.133E-01 | 3.519E-01 |
| GPR137     | 0.014 | 9.198E-01 | 3.523E-01 |
| ACP5       | 0.014 | 9.630E-01 | 7.765E-01 |
| NDUFV3     | 0.014 | 9.238E-01 | 7.109E-01 |
| TARSL2     | 0.014 | 9.327E-01 | 3.870E-01 |
| PAFAH1B2   | 0.014 | 8.858E-01 | 3.501E-01 |
| MIR4740    | 0.014 | 9.719E-01 | 7.507E-01 |
| LANCL3     | 0.013 | 9.693E-01 | 2.933E-01 |
| LRRC8A     | 0.013 | 9.545E-01 | 9.235E-01 |
| MMP12      | 0.013 | 9.833E-01 | 8.979E-01 |
| ZNF836     | 0.013 | 9.272E-01 | 2.959E-01 |
| PUM1       | 0.013 | 8.886E-01 | 4.791E-01 |
| MORC2      | 0.013 | 9.164E-01 | 4.666E-01 |
| IGIP       | 0.013 | 9.334E-01 | 3.033E-01 |
| HARBI1     | 0.013 | 9.165E-01 | 6.542E-01 |
| OR52A1     | 0.013 | NA        | 2.818E-01 |
| MIR676     | 0.013 | NA        | 4.598E-01 |
| OR9G4      | 0.013 | NA        | 6.760E-01 |
| KRT13      | 0.013 | 9.861E-01 | 1.614E-01 |
| NOM1       | 0.013 | 8.998E-01 | 1.869E-01 |
| MRPS23     | 0.013 | 9.133E-01 | 7.429E-01 |
| TMEM132A   | 0.013 | 9.579E-01 | 7.578E-01 |
| KIAA0556   | 0.013 | 9.207E-01 | 6.493E-01 |
| USP8       | 0.013 | 9.033E-01 | 4.902E-01 |
| SLC7A7     | 0.013 | 9.728E-01 | 2.204E-01 |
| ARRDC3     | 0.013 | 9.494E-01 | 3.296E-01 |
| MIR4449    | 0.013 | NA        | 4.138E-01 |
| RGCP-MRPS: | 0.013 | 9.696E-01 | 2.895E-01 |
| TNFRSF10C  | 0.013 | 9.733E-01 | 7.688E-01 |
| PRR14      | 0.013 | 9.105E-01 | 9.779E-01 |
| CNIH1      | 0.013 | 9.103E-01 | 9.779E-01 |
| GTDC1      | 0.013 | 9.094E-01 | 9.764E-01 |
| GPR42      | 0.013 | 9.893E-01 | 9.761E-01 |
| ZNF678     | 0.013 | 9.288E-01 | 9.761E-01 |
| SEC16A     | 0.013 | 8.986E-01 | 9.744E-01 |
| YTHDF1     | 0.013 | 8.883E-01 | 9.729E-01 |
| SMU1       | 0.013 | 9.095E-01 | 9.725E-01 |
| TIMM10B    | 0.013 | 9.056E-01 | 9.707E-01 |
| TEX29      | 0.013 | 9.718E-01 | 4.486E-01 |
| CCDC113    | 0.013 | 9.579E-01 | 2.142E-01 |
| SCAF4      | 0.013 | 9.080E-01 | 3.501E-01 |
| GLE1       | 0.013 | 9.274E-01 | 2.137E-01 |

|            |       |           |           |
|------------|-------|-----------|-----------|
| CALCOCO1   | 0.013 | 9.246E-01 | 7.023E-01 |
| SRSF4      | 0.013 | 8.880E-01 | 3.694E-01 |
| TMED7      | 0.013 | 9.180E-01 | 3.277E-01 |
| NOTO       | 0.013 | 9.889E-01 | 7.592E-01 |
| DCPS       | 0.013 | 9.238E-01 | 7.280E-01 |
| ZNF263     | 0.013 | 8.868E-01 | 8.134E-01 |
| GRHL2      | 0.013 | 9.612E-01 | 9.348E-01 |
| ARL1       | 0.013 | 9.164E-01 | 6.910E-01 |
| PPP1R3A    | 0.013 | NA        | 8.445E-01 |
| CLINT1     | 0.012 | 9.372E-01 | 4.210E-01 |
| FAHD2A     | 0.012 | 9.272E-01 | 3.595E-01 |
| ASAH2B     | 0.012 | 9.375E-01 | 2.091E-01 |
| MIR6088    | 0.012 | NA        | 7.147E-01 |
| FANCE      | 0.012 | 9.524E-01 | 4.241E-01 |
| TRPC4      | 0.012 | 9.706E-01 | 6.031E-01 |
| CU639417.2 | 0.012 | 9.688E-01 | 3.316E-01 |
| PCYT1A     | 0.012 | 9.192E-01 | 3.293E-01 |
| ERC1       | 0.012 | 9.475E-01 | 6.308E-01 |
| SNRPG      | 0.012 | 9.238E-01 | 5.346E-01 |
| CEP295     | 0.012 | 9.392E-01 | 3.898E-01 |
| ASL        | 0.012 | 9.412E-01 | 7.772E-01 |
| HMCES      | 0.012 | 9.183E-01 | 6.146E-01 |
| LBH        | 0.012 | 9.635E-01 | 7.073E-01 |
| ZNF543     | 0.012 | 9.319E-01 | 3.452E-01 |
| INTS8      | 0.012 | 9.246E-01 | 2.116E-01 |
| TMEM41B    | 0.012 | 9.273E-01 | 6.280E-01 |
| RAI14      | 0.012 | 9.579E-01 | 5.612E-01 |
| TRRAP      | 0.012 | 9.208E-01 | 8.885E-01 |
| SART1      | 0.012 | 9.210E-01 | 3.177E-01 |
| CREBRF     | 0.012 | 9.344E-01 | 3.415E-01 |
| KLF10      | 0.012 | 9.597E-01 | 3.041E-01 |
| CD63       | 0.012 | 9.452E-01 | 6.730E-01 |
| ALKBH6     | 0.012 | 9.488E-01 | 2.372E-01 |
| CIAO1      | 0.012 | 8.882E-01 | 7.233E-01 |
| TMCO4      | 0.012 | 9.484E-01 | 3.805E-01 |
| MPP1       | 0.012 | 9.718E-01 | 2.633E-01 |
| ADSS       | 0.012 | 9.131E-01 | 6.160E-01 |
| UBE2QL1    | 0.012 | 9.785E-01 | 1.616E-01 |
| HADHA      | 0.012 | 9.095E-01 | 5.483E-01 |
| PCDHGB7    | 0.012 | 9.749E-01 | 7.627E-01 |
| UBXN2B     | 0.012 | 9.289E-01 | 3.186E-01 |
| TADA2A     | 0.012 | 9.251E-01 | 5.905E-01 |
| SMG5       | 0.012 | 9.218E-01 | 5.027E-01 |
| HINT3      | 0.012 | 9.190E-01 | 3.956E-01 |
| ORC6       | 0.012 | 9.579E-01 | 4.193E-01 |
| DERL3      | 0.012 | 9.752E-01 | 2.831E-01 |
| SNAPC3     | 0.012 | 9.345E-01 | 4.693E-01 |
| FTSJ1      | 0.012 | 9.296E-01 | 6.776E-01 |
| IGLL1      | 0.012 | 9.877E-01 | 4.885E-01 |
| ERGIC2     | 0.012 | 9.096E-01 | 4.261E-01 |

|           |       |           |           |
|-----------|-------|-----------|-----------|
| PURG      | 0.012 | 9.796E-01 | 7.758E-01 |
| ST18      | 0.012 | 9.769E-01 | 7.557E-01 |
| TMEM184B  | 0.012 | 9.250E-01 | 5.351E-01 |
| JUND      | 0.012 | 9.582E-01 | 7.526E-01 |
| TBC1D7    | 0.012 | 9.435E-01 | 4.915E-01 |
| EIF4EBP1  | 0.012 | 9.654E-01 | 3.164E-01 |
| LCMT2     | 0.012 | 9.384E-01 | 4.162E-01 |
| PACSIN2   | 0.012 | 9.128E-01 | 6.603E-01 |
| FMO2      | 0.012 | 9.828E-01 | 7.776E-01 |
| SMOX      | 0.012 | 9.692E-01 | 9.119E-01 |
| MTCH2     | 0.012 | 9.141E-01 | 3.005E-01 |
| MIR6728   | 0.012 | 9.802E-01 | 7.476E-01 |
| TJP3      | 0.012 | 9.780E-01 | 7.716E-01 |
| CACFD1    | 0.012 | 9.547E-01 | 2.817E-01 |
| BTBD6     | 0.012 | 9.371E-01 | 3.469E-01 |
| CCL8      | 0.012 | 9.828E-01 | 4.081E-01 |
| MSRB1     | 0.012 | 9.542E-01 | 3.247E-01 |
| TAF2      | 0.012 | 9.489E-01 | 4.522E-01 |
| AMIGO3    | 0.011 | 9.770E-01 | 3.557E-01 |
| DTYMK     | 0.011 | 9.480E-01 | 8.070E-01 |
| CYP4V2    | 0.011 | 9.587E-01 | 2.694E-01 |
| ZNF865    | 0.011 | 9.380E-01 | 4.280E-01 |
| ZBTB45    | 0.011 | 9.324E-01 | 3.431E-01 |
| KIAA0513  | 0.011 | 9.652E-01 | 4.347E-01 |
| SLC10A7   | 0.011 | 9.375E-01 | 2.833E-01 |
| CLCN2     | 0.011 | 9.488E-01 | 2.675E-01 |
| IFNK      | 0.011 | 9.945E-01 | 2.641E-01 |
| EIF2S2    | 0.011 | 9.319E-01 | 7.439E-02 |
| NUP210    | 0.011 | 9.742E-01 | 4.172E-01 |
| SPINT4    | 0.011 | NA        | 4.820E-01 |
| NIPBL     | 0.011 | 9.326E-01 | 9.576E-01 |
| HIST1H2AL | 0.011 | 9.792E-01 | 2.201E-01 |
| ZNF630    | 0.011 | 9.643E-01 | 3.180E-01 |
| ZBED9     | 0.011 | 9.787E-01 | 7.754E-01 |
| ZNF407    | 0.011 | 9.265E-01 | 3.587E-01 |
| GRIPAP1   | 0.011 | 9.167E-01 | 7.487E-01 |
| UNC13A    | 0.011 | 9.790E-01 | 6.475E-01 |
| STK38     | 0.011 | 9.317E-01 | 3.248E-01 |
| AMY1B     | 0.011 | NA        | 3.826E-01 |
| NRBF2     | 0.011 | 9.333E-01 | 2.454E-01 |
| ATP5J2    | 0.011 | 9.435E-01 | 3.123E-01 |
| ZNF429    | 0.011 | 9.638E-01 | 4.334E-01 |
| ZNF41     | 0.011 | 9.483E-01 | 6.252E-01 |
| HMG1      | 0.011 | 9.282E-01 | 2.805E-01 |
| PHLPP2    | 0.011 | 9.519E-01 | 8.630E-01 |
| MPP3      | 0.011 | 9.718E-01 | 3.050E-01 |
| SMG8      | 0.011 | 9.480E-01 | 3.100E-01 |
| DCLK1     | 0.011 | 9.837E-01 | 3.973E-01 |
| CD1C      | 0.011 | 9.809E-01 | 2.675E-01 |
| MIR4479   | 0.011 | NA        | 4.745E-01 |

|            |       |           |           |
|------------|-------|-----------|-----------|
| ETHE1      | 0.011 | 9.604E-01 | 4.147E-01 |
| AC010542.3 | 0.011 | 9.870E-01 | 6.128E-01 |
| RYK        | 0.011 | 9.171E-01 | 3.699E-01 |
| PABPN1L    | 0.011 | 9.916E-01 | 1.303E-01 |
| CHMP2B     | 0.011 | 9.508E-01 | 3.188E-01 |
| AC009133.6 | 0.011 | NA        | 7.435E-01 |
| TAAR6      | 0.011 | NA        | 2.808E-01 |
| DEFB115    | 0.011 | NA        | 6.410E-01 |
| SMARCC1    | 0.011 | 9.460E-01 | 7.965E-01 |
| ZMYND11    | 0.010 | 9.443E-01 | 6.974E-01 |
| MPPE1      | 0.010 | 9.466E-01 | 6.537E-01 |
| SNX25      | 0.010 | 9.499E-01 | 4.402E-01 |
| TPP2       | 0.010 | 9.188E-01 | 5.427E-01 |
| MIR3653    | 0.010 | 9.715E-01 | 4.214E-01 |
| NANS       | 0.010 | 9.544E-01 | 3.761E-01 |
| ELAC1      | 0.010 | 9.361E-01 | 4.805E-01 |
| STK4       | 0.010 | 9.313E-01 | 5.751E-01 |
| GPR61      | 0.010 | 9.721E-01 | 6.071E-01 |
| AC090360.1 | 0.010 | 9.780E-01 | 3.180E-01 |
| AIDA       | 0.010 | 9.479E-01 | 4.755E-01 |
| PCDHB12    | 0.010 | 9.749E-01 | 3.958E-01 |
| UBQLN2     | 0.010 | 9.430E-01 | 2.729E-01 |
| CBLN3      | 0.010 | 9.643E-01 | 7.721E-01 |
| AUTS2      | 0.010 | 9.755E-01 | 8.373E-01 |
| RAB25      | 0.010 | 9.718E-01 | 7.715E-01 |
| AMDHD1     | 0.010 | 9.837E-01 | 8.171E-01 |
| DTX2       | 0.010 | 9.551E-01 | 3.284E-01 |
| BCL6       | 0.010 | 9.604E-01 | 9.849E-01 |
| BIRC6      | 0.010 | 9.371E-01 | 9.849E-01 |
| C17orf74   | 0.010 | 9.919E-01 | 9.846E-01 |
| ERICH2     | 0.010 | 9.833E-01 | 9.833E-01 |
| OR51I1     | 0.010 | 9.945E-01 | 9.830E-01 |
| HDAC6      | 0.010 | 9.435E-01 | 9.815E-01 |
| GNG10      | 0.010 | 9.520E-01 | 9.809E-01 |
| IGFL4      | 0.010 | 9.874E-01 | 9.809E-01 |
| MIR1207    | 0.010 | NA        | 9.808E-01 |
| ZDHHC13    | 0.010 | 9.585E-01 | 9.778E-01 |
| RP9        | 0.010 | 9.463E-01 | 9.776E-01 |
| STAG2      | 0.010 | 9.592E-01 | 9.774E-01 |
| GPNMB      | 0.010 | 9.837E-01 | 5.695E-01 |
| YWHAH      | 0.010 | 9.502E-01 | 4.184E-01 |
| SPPL2B     | 0.010 | 9.585E-01 | 3.250E-01 |
| C9orf43    | 0.010 | 9.654E-01 | 5.725E-01 |
| TMC6       | 0.010 | 9.616E-01 | 3.139E-01 |
| FBXO34     | 0.010 | 9.447E-01 | 4.210E-01 |
| GGH        | 0.010 | 9.738E-01 | 4.381E-01 |
| FAM89B     | 0.010 | 9.520E-01 | 6.446E-01 |
| CFAP36     | 0.010 | 9.444E-01 | 5.201E-01 |
| VPS4A      | 0.010 | 9.364E-01 | 6.947E-01 |
| DCAF1      | 0.010 | 9.375E-01 | 3.760E-01 |

|            |       |           |           |
|------------|-------|-----------|-----------|
| DDX27      | 0.010 | 9.264E-01 | 4.588E-01 |
| TBC1D19    | 0.010 | 9.455E-01 | 7.054E-01 |
| C4orf22    | 0.010 | 9.858E-01 | 3.628E-01 |
| RAD51B     | 0.010 | 9.580E-01 | 2.840E-01 |
| ZNF595     | 0.010 | 9.691E-01 | 4.837E-01 |
| ADNP2      | 0.010 | 9.418E-01 | 5.945E-01 |
| MRPS21     | 0.010 | 9.643E-01 | 5.663E-01 |
| ZNF599     | 0.010 | 9.579E-01 | 3.359E-01 |
| PLPP2      | 0.009 | 9.749E-01 | 6.372E-01 |
| VMA21      | 0.009 | 9.377E-01 | 3.749E-01 |
| FAM20B     | 0.009 | 9.367E-01 | 2.627E-01 |
| RAB11FIP3  | 0.009 | 9.521E-01 | 5.235E-01 |
| GPSM1      | 0.009 | 9.749E-01 | 8.324E-01 |
| INTS14     | 0.009 | 9.133E-01 | 2.615E-01 |
| UBIAD1     | 0.009 | 9.292E-01 | 4.152E-01 |
| TSR3       | 0.009 | 9.458E-01 | 8.902E-01 |
| ZMYM4      | 0.009 | 9.251E-01 | 8.497E-01 |
| MRPS18B    | 0.009 | 9.468E-01 | 6.996E-01 |
| NCKAP1     | 0.009 | 9.502E-01 | 2.523E-01 |
| CCDC171    | 0.009 | 9.644E-01 | 8.206E-01 |
| TMEM173    | 0.009 | 9.718E-01 | 3.956E-01 |
| NOMO1      | 0.009 | 9.480E-01 | 6.435E-01 |
| DNMT3B     | 0.009 | 9.759E-01 | 2.441E-01 |
| SP1        | 0.009 | 9.359E-01 | 2.309E-01 |
| GCFC2      | 0.009 | 9.350E-01 | 4.013E-01 |
| MEF2A      | 0.009 | 9.542E-01 | 3.087E-01 |
| BUB1B-PAK6 | 0.009 | 9.861E-01 | 5.567E-01 |
| BRMS1      | 0.009 | 9.587E-01 | 4.881E-01 |
| H2AFX      | 0.009 | 9.634E-01 | 2.541E-01 |
| PPP4R1     | 0.009 | 9.586E-01 | 7.773E-01 |
| FBXO48     | 0.009 | 9.468E-01 | 7.737E-01 |
| KBTBD12    | 0.009 | 9.916E-01 | 5.165E-01 |
| KRT35      | 0.009 | 9.946E-01 | 2.647E-01 |
| PLEKHA7    | 0.009 | 9.733E-01 | 7.900E-01 |
| MIR8069-2  | 0.009 | NA        | 4.964E-01 |
| MIR216B    | 0.009 | NA        | 8.339E-01 |
| MIR362     | 0.009 | NA        | 3.379E-01 |
| MIR517B    | 0.009 | NA        | 3.058E-01 |
| MIR586     | 0.009 | NA        | 4.228E-01 |
| POTEB      | 0.009 | NA        | 2.872E-01 |
| DEFB106B   | 0.009 | NA        | 3.180E-01 |
| MIR1265    | 0.009 | NA        | 4.407E-01 |
| MIR378D1   | 0.009 | NA        | 3.874E-01 |
| MIR4325    | 0.009 | NA        | 3.844E-01 |
| MIR448     | 0.009 | NA        | 6.707E-01 |
| MIR4486    | 0.009 | NA        | 7.209E-01 |
| MIR548AV   | 0.009 | NA        | 7.659E-01 |
| EDC4       | 0.009 | 9.483E-01 | 5.278E-01 |
| MPZL2      | 0.009 | 9.749E-01 | 6.930E-01 |
| THAP11     | 0.009 | 9.386E-01 | 3.477E-01 |

|            |       |           |           |
|------------|-------|-----------|-----------|
| MAPK1      | 0.009 | 9.457E-01 | 4.057E-01 |
| FOSL2      | 0.009 | 9.638E-01 | 3.192E-01 |
| SSX2IP     | 0.009 | 9.632E-01 | 3.557E-01 |
| GIMAP1     | 0.009 | 9.785E-01 | 5.796E-01 |
| CSPP1      | 0.009 | 9.556E-01 | 7.046E-01 |
| KRT222     | 0.009 | 9.877E-01 | 6.445E-01 |
| SLC4A3     | 0.009 | 9.796E-01 | 3.454E-01 |
| HNRNPUL2   | 0.009 | 9.325E-01 | 3.019E-01 |
| CTDSPL     | 0.009 | 9.598E-01 | 5.266E-01 |
| IMMT       | 0.009 | 9.313E-01 | 6.914E-01 |
| MFSD14C    | 0.009 | 9.612E-01 | 3.388E-01 |
| PCDHGA10   | 0.009 | 9.843E-01 | 4.023E-01 |
| ZNF697     | 0.009 | 9.692E-01 | 3.083E-01 |
| ARHGAP19   | 0.009 | 9.598E-01 | 6.186E-01 |
| CEP41      | 0.009 | 9.692E-01 | 4.768E-01 |
| OR6B3      | 0.009 | 9.946E-01 | 4.505E-01 |
| CNGA4      | 0.009 | 9.809E-01 | 1.899E-01 |
| CRELD2     | 0.009 | 9.566E-01 | 3.049E-01 |
| GDF11      | 0.009 | 9.718E-01 | 9.738E-01 |
| MLLT10     | 0.008 | 9.488E-01 | 9.677E-01 |
| ACOT8      | 0.008 | 9.508E-01 | 3.012E-01 |
| MAPKAPK2   | 0.008 | 9.473E-01 | 7.150E-01 |
| EGFL6      | 0.008 | 9.790E-01 | 4.574E-01 |
| TESK1      | 0.008 | 9.517E-01 | 2.973E-01 |
| PCGF5      | 0.008 | 9.579E-01 | 7.494E-01 |
| MEPCE      | 0.008 | 9.450E-01 | 3.983E-01 |
| TDRD7      | 0.008 | 9.616E-01 | 7.674E-01 |
| CEP76      | 0.008 | 9.586E-01 | 8.306E-01 |
| GTF3C2     | 0.008 | 9.386E-01 | 3.803E-01 |
| EP300      | 0.008 | 9.601E-01 | 7.063E-01 |
| CPSF2      | 0.008 | 9.457E-01 | 8.999E-01 |
| MASP1      | 0.008 | 9.861E-01 | 2.709E-01 |
| GPHN       | 0.008 | 9.680E-01 | 4.327E-01 |
| ARFGAP2    | 0.008 | 9.423E-01 | 4.751E-01 |
| AC004997.1 | 0.008 | 9.792E-01 | 3.109E-01 |
| NUTM2B     | 0.008 | 9.796E-01 | 4.870E-01 |
| NDUFAB1    | 0.008 | 9.544E-01 | 5.718E-01 |
| EPB41L2    | 0.008 | 9.759E-01 | 6.830E-01 |
| ANO8       | 0.008 | 9.752E-01 | 5.472E-01 |
| SLC25A11   | 0.008 | 9.513E-01 | 9.165E-01 |
| TOMM40     | 0.008 | 9.600E-01 | 3.264E-01 |
| B4GALNT3   | 0.008 | 9.874E-01 | 5.222E-01 |
| ASNA1      | 0.008 | 9.380E-01 | 5.343E-01 |
| CCT5       | 0.008 | 9.667E-01 | 7.625E-01 |
| HTR7       | 0.008 | 9.903E-01 | 3.920E-01 |
| OXSM       | 0.008 | 9.536E-01 | 2.535E-01 |
| HBG1       | 0.008 | NA        | 6.095E-01 |
| MIR4774    | 0.008 | NA        | 9.393E-01 |
| OR7G3      | 0.008 | NA        | 3.665E-01 |
| MIR1537    | 0.008 | NA        | 6.826E-01 |

|            |       |           |           |
|------------|-------|-----------|-----------|
| MIR4725    | 0.008 | NA        | 8.544E-01 |
| OR6J1      | 0.008 | NA        | 5.706E-01 |
| GOLGA6D    | 0.008 | NA        | 7.440E-01 |
| CYP11B2    | 0.008 | NA        | 4.046E-01 |
| PCDHGA8    | 0.008 | 9.835E-01 | 8.367E-01 |
| OR13C5     | 0.008 | NA        | 6.450E-01 |
| SF3B6      | 0.008 | 9.455E-01 | 7.469E-01 |
| LHFPL1     | 0.008 | 9.895E-01 | 4.278E-01 |
| STX17      | 0.008 | 9.580E-01 | 2.815E-01 |
| PRNP       | 0.008 | 9.824E-01 | 4.106E-01 |
| ZNF879     | 0.008 | 9.821E-01 | 3.413E-01 |
| STYXL1     | 0.008 | 9.600E-01 | 3.518E-01 |
| ARHGAP18   | 0.008 | 9.671E-01 | 4.434E-01 |
| CCDC12     | 0.008 | 9.654E-01 | 6.378E-01 |
| POU2F1     | 0.008 | 9.582E-01 | 3.847E-01 |
| CENPS      | 0.008 | 9.619E-01 | 9.856E-01 |
| RANBP10    | 0.008 | 9.508E-01 | 9.856E-01 |
| MKL2       | 0.008 | 9.614E-01 | 9.856E-01 |
| ZNF776     | 0.007 | 9.643E-01 | 9.856E-01 |
| CGNL1      | 0.007 | 9.837E-01 | 9.856E-01 |
| HSPA8      | 0.007 | 9.697E-01 | 9.856E-01 |
| SLC2A4RG   | 0.007 | 9.685E-01 | 9.856E-01 |
| KCNIP1     | 0.007 | 9.919E-01 | 9.847E-01 |
| SYTL3      | 0.007 | 9.792E-01 | 9.846E-01 |
| AP000311.1 | 0.007 | 9.939E-01 | 9.846E-01 |
| EPC1       | 0.007 | 9.478E-01 | 9.844E-01 |
| RAB17      | 0.007 | 9.843E-01 | 9.844E-01 |
| OGFOD1     | 0.007 | 9.413E-01 | 9.843E-01 |
| SCARB1     | 0.007 | 9.783E-01 | 9.842E-01 |
| ZNF726     | 0.007 | 9.837E-01 | 9.841E-01 |
| SOX13      | 0.007 | 9.756E-01 | 7.826E-01 |
| FCN3       | 0.007 | 9.815E-01 | 2.878E-01 |
| KIAA1143   | 0.007 | 9.481E-01 | 3.593E-01 |
| AP1S2      | 0.007 | 9.749E-01 | 5.852E-01 |
| SIX2       | 0.007 | 9.914E-01 | 3.633E-01 |
| TBL1X      | 0.007 | 9.766E-01 | 6.001E-01 |
| CASS4      | 0.007 | 9.832E-01 | 3.969E-01 |
| HNF1B      | 0.007 | 9.925E-01 | 6.749E-01 |
| PAIP1      | 0.007 | 9.600E-01 | 7.219E-01 |
| ZBTB18     | 0.007 | 9.783E-01 | 6.930E-01 |
| BIRC2      | 0.007 | 9.696E-01 | 5.023E-01 |
| ASB16      | 0.007 | 9.753E-01 | 4.270E-01 |
| SPRTN      | 0.007 | 9.544E-01 | 4.482E-01 |
| PIGBOS1    | 0.007 | 9.587E-01 | 2.802E-01 |
| MT-ND2     | 0.007 | 9.828E-01 | 6.733E-01 |
| POLD3      | 0.007 | 9.600E-01 | 5.599E-01 |
| ABCB1      | 0.007 | 9.835E-01 | 3.172E-01 |
| DUS4L      | 0.007 | 9.590E-01 | 8.918E-01 |
| POLD1      | 0.007 | 9.690E-01 | 7.786E-01 |
| PRUNE1     | 0.007 | 9.652E-01 | 9.060E-01 |

|           |       |           |           |
|-----------|-------|-----------|-----------|
| KDF1      | 0.007 | 9.759E-01 | 2.338E-01 |
| JRKL      | 0.007 | 9.644E-01 | 4.181E-01 |
| IGSF10    | 0.007 | 9.930E-01 | 3.295E-01 |
| CATSPERB  | 0.007 | 9.873E-01 | 7.826E-01 |
| SLC4A5    | 0.007 | 9.767E-01 | 2.912E-01 |
| MYPOP     | 0.007 | 9.598E-01 | 3.280E-01 |
| CERS6     | 0.007 | 9.733E-01 | 4.268E-01 |
| PHF14     | 0.006 | 9.624E-01 | 4.064E-01 |
| BCAT2     | 0.006 | 9.837E-01 | 9.624E-01 |
| ERLIN1    | 0.006 | 9.650E-01 | 8.920E-01 |
| ZNF606    | 0.006 | 9.773E-01 | 7.932E-01 |
| ATP6V1D   | 0.006 | 9.630E-01 | 4.402E-01 |
| DRAP1     | 0.006 | 9.713E-01 | 5.967E-01 |
| SLC22A17  | 0.006 | 9.832E-01 | 3.877E-01 |
| NUP58     | 0.006 | 9.669E-01 | 6.481E-01 |
| OR2T27    | 0.006 | NA        | 2.922E-01 |
| MIR4436B1 | 0.006 | NA        | 4.263E-01 |
| MIR548X   | 0.006 | NA        | 5.221E-01 |
| OR8H2     | 0.006 | NA        | 3.815E-01 |
| DAZ3      | 0.006 | NA        | 4.940E-01 |
| MIR1267   | 0.006 | NA        | 5.514E-01 |
| MIR3922   | 0.006 | NA        | 7.612E-01 |
| MIR4703   | 0.006 | NA        | 7.872E-01 |
| OR2T4     | 0.006 | NA        | 4.919E-01 |
| OR4B1     | 0.006 | NA        | 4.306E-01 |
| OR4D9     | 0.006 | NA        | 8.737E-01 |
| DEFB131   | 0.006 | NA        | 4.071E-01 |
| MIR605    | 0.006 | NA        | 2.154E-01 |
| OR10Z1    | 0.006 | NA        | 3.270E-01 |
| OR51H1    | 0.006 | NA        | 4.256E-01 |
| MIR3162   | 0.006 | NA        | 5.416E-01 |
| ZNF280D   | 0.006 | 9.586E-01 | 6.088E-01 |
| AHCYL1    | 0.006 | 9.600E-01 | 5.529E-01 |
| PPP2R3C   | 0.006 | 9.616E-01 | 2.402E-01 |
| ZMYM1     | 0.006 | 9.632E-01 | 6.619E-01 |
| ZHX1      | 0.006 | 9.747E-01 | 3.204E-01 |
| ZMYND19   | 0.006 | 9.696E-01 | 2.247E-01 |
| CHRNA5    | 0.006 | 9.783E-01 | 2.688E-01 |
| BTRC      | 0.006 | 9.616E-01 | 3.502E-01 |
| SLF2      | 0.006 | 9.602E-01 | 3.643E-01 |
| USP11     | 0.006 | 9.694E-01 | 5.054E-01 |
| PFKM      | 0.006 | 9.749E-01 | 2.524E-01 |
| ZNF566    | 0.006 | 9.721E-01 | 8.290E-01 |
| NSRP1     | 0.006 | 9.584E-01 | 3.339E-01 |
| COA7      | 0.006 | 9.644E-01 | 4.311E-01 |
| VPS54     | 0.006 | 9.545E-01 | 4.283E-01 |
| MIR378H   | 0.006 | 9.925E-01 | 3.834E-01 |
| EMC10     | 0.006 | 9.714E-01 | 7.345E-01 |
| HOXC6     | 0.006 | 9.919E-01 | 3.216E-01 |
| PARP2     | 0.006 | 9.652E-01 | 5.585E-01 |



|            |       |           |           |
|------------|-------|-----------|-----------|
| RRAGC      | 0.006 | 9.714E-01 | 3.893E-01 |
| SEC23IP    | 0.006 | 9.597E-01 | 8.373E-01 |
| PLEKHF2    | 0.006 | 9.748E-01 | 9.741E-01 |
| IPO9       | 0.006 | 9.663E-01 | 9.726E-01 |
| ARHGDIG    | 0.006 | 9.946E-01 | 9.723E-01 |
| MRPL13     | 0.006 | 9.689E-01 | 4.186E-01 |
| NEDD4L     | 0.006 | 9.824E-01 | 3.051E-01 |
| GNAT1      | 0.006 | 9.937E-01 | 2.635E-01 |
| FAM204A    | 0.006 | 9.520E-01 | 4.149E-01 |
| CBWD2      | 0.006 | 9.600E-01 | 9.571E-01 |
| HEMK1      | 0.006 | 9.749E-01 | 9.728E-01 |
| THAP5      | 0.006 | 9.602E-01 | 4.553E-01 |
| KCTD17     | 0.006 | 9.770E-01 | 2.494E-01 |
| CWF19L1    | 0.006 | 9.598E-01 | 7.310E-01 |
| ZNF442     | 0.006 | 9.822E-01 | 5.272E-01 |
| KIF2C      | 0.006 | 9.804E-01 | 9.775E-01 |
| ZNF639     | 0.006 | 9.604E-01 | 2.540E-01 |
| CKLF       | 0.006 | 9.752E-01 | 7.532E-01 |
| ATF6B      | 0.006 | 9.630E-01 | 2.913E-01 |
| AC068946.1 | 0.006 | 9.873E-01 | 2.895E-01 |
| PBRM1      | 0.006 | 9.714E-01 | 7.509E-01 |
| USPL1      | 0.006 | 9.669E-01 | 4.394E-01 |
| DHFR       | 0.005 | 9.792E-01 | 2.948E-01 |
| ARL5B      | 0.005 | 9.763E-01 | 2.366E-01 |
| PDCD2L     | 0.005 | 9.752E-01 | 2.844E-01 |
| NAA20      | 0.005 | 9.719E-01 | 6.026E-01 |
| SYNE3      | 0.005 | 9.873E-01 | 7.330E-01 |
| IFT172     | 0.005 | 9.733E-01 | 3.208E-01 |
| DCANP1     | 0.005 | NA        | 7.987E-01 |
| MIR4637    | 0.005 | NA        | 6.216E-01 |
| MIR4518    | 0.005 | NA        | 3.870E-01 |
| CCDC106    | 0.005 | 9.847E-01 | 7.454E-01 |
| PAXBP1     | 0.005 | 9.783E-01 | 4.446E-01 |
| CRISP2     | 0.005 | 9.959E-01 | 4.017E-01 |
| ADAD2      | 0.005 | 9.919E-01 | 8.274E-01 |
| RAG2       | 0.005 | 9.945E-01 | 6.688E-01 |
| TRIM32     | 0.005 | 9.729E-01 | 5.921E-01 |
| NAXD       | 0.005 | 9.710E-01 | 7.908E-01 |
| ERGIC3     | 0.005 | 9.713E-01 | 6.254E-01 |
| FAM96A     | 0.005 | 9.618E-01 | 7.178E-01 |
| GPI        | 0.005 | 9.763E-01 | 3.894E-01 |
| MFSD14A    | 0.005 | 9.691E-01 | 4.536E-01 |
| MRPS11     | 0.005 | 9.638E-01 | 3.086E-01 |
| NFYB       | 0.005 | 9.624E-01 | 4.136E-01 |
| DYNC2LI1   | 0.005 | 9.709E-01 | 8.066E-01 |
| LGI2       | 0.005 | 9.919E-01 | 8.784E-01 |
| EIF2AK2    | 0.005 | 9.749E-01 | 3.016E-01 |
| BTBD18     | 0.005 | 9.889E-01 | 6.846E-01 |
| NEK1       | 0.005 | 9.752E-01 | 5.920E-01 |
| RBMS1      | 0.005 | 9.728E-01 | 8.300E-01 |

|            |       |           |           |
|------------|-------|-----------|-----------|
| POLDIP2    | 0.005 | 9.689E-01 | 9.864E-01 |
| THRAP3     | 0.005 | 9.537E-01 | 9.864E-01 |
| ARF5       | 0.005 | 9.718E-01 | 9.864E-01 |
| RETREG3    | 0.005 | 9.695E-01 | 9.864E-01 |
| ACVR2B     | 0.005 | 9.865E-01 | 9.864E-01 |
| PKIB       | 0.005 | 9.919E-01 | 9.864E-01 |
| MANBA      | 0.005 | 9.789E-01 | 9.864E-01 |
| C12orf74   | 0.005 | 9.945E-01 | 9.864E-01 |
| RAD54L2    | 0.005 | 9.718E-01 | 9.864E-01 |
| STAB1      | 0.005 | 9.915E-01 | 9.864E-01 |
| PKM        | 0.005 | 9.824E-01 | 9.864E-01 |
| CLEC12A    | 0.005 | 9.944E-01 | 9.864E-01 |
| CIC        | 0.005 | 9.718E-01 | 9.864E-01 |
| KCNJ1      | 0.005 | 9.928E-01 | 9.864E-01 |
| DHX36      | 0.005 | 9.729E-01 | 9.864E-01 |
| UBE2Q2L    | 0.005 | 9.946E-01 | 9.864E-01 |
| ING2       | 0.005 | 9.769E-01 | 9.864E-01 |
| SHKBP1     | 0.005 | 9.752E-01 | 9.864E-01 |
| KIF11      | 0.005 | 9.845E-01 | 9.864E-01 |
| AP002495.2 | 0.005 | 9.785E-01 | 9.864E-01 |
| CCDC142    | 0.005 | 9.774E-01 | 9.864E-01 |
| ZNF518B    | 0.005 | 9.881E-01 | 9.864E-01 |
| SLC16A14   | 0.004 | 9.892E-01 | 9.864E-01 |
| ATP11C     | 0.004 | 9.783E-01 | 9.864E-01 |
| SAA2       | 0.004 | 9.949E-01 | 9.864E-01 |
| HIST1H3A   | 0.004 | 9.931E-01 | 9.864E-01 |
| TRIM28     | 0.004 | 9.761E-01 | 9.864E-01 |
| XPNPEP3    | 0.004 | 9.749E-01 | 9.864E-01 |
| ZBED2      | 0.004 | 9.946E-01 | 9.864E-01 |
| DOCK7      | 0.004 | 9.766E-01 | 9.864E-01 |
| HPD        | 0.004 | 9.919E-01 | 9.864E-01 |
| DAPK2      | 0.004 | 9.919E-01 | 4.108E-01 |
| AMFR       | 0.004 | 9.709E-01 | 6.613E-01 |
| SLC39A3    | 0.004 | 9.792E-01 | 4.501E-01 |
| AL049779.1 | 0.004 | 9.921E-01 | 4.771E-01 |
| NFKBIL1    | 0.004 | 9.792E-01 | 3.469E-01 |
| HOXB13     | 0.004 | 9.946E-01 | 3.797E-01 |
| NEDD8      | 0.004 | 9.749E-01 | 7.453E-01 |
| SNX9       | 0.004 | 9.749E-01 | 3.330E-01 |
| STIP1      | 0.004 | 9.752E-01 | 6.726E-01 |
| MICU3      | 0.004 | 9.926E-01 | 3.761E-01 |
| TMEM220    | 0.004 | 9.911E-01 | 3.034E-01 |
| CMTM1      | 0.004 | 9.874E-01 | 3.223E-01 |
| CBX3       | 0.004 | 9.721E-01 | 8.727E-01 |
| ATP6V1B2   | 0.004 | 9.811E-01 | 7.908E-01 |
| PRKCSH     | 0.004 | 9.717E-01 | 1.997E-01 |
| CABP1      | 0.004 | 9.936E-01 | 6.868E-01 |
| MAP1LC3B   | 0.004 | 9.745E-01 | 4.500E-01 |
| ARHGAP4    | 0.004 | 9.916E-01 | 4.452E-01 |
| MKKS       | 0.004 | 9.749E-01 | 3.200E-01 |

|              |       |           |           |
|--------------|-------|-----------|-----------|
| ITGB6        | 0.004 | 9.928E-01 | 4.581E-01 |
| ZNF662       | 0.004 | 9.946E-01 | 6.236E-01 |
| ASB3         | 0.004 | 9.751E-01 | 5.115E-01 |
| ATOX1        | 0.004 | 9.833E-01 | 3.195E-01 |
| GLO1         | 0.004 | 9.811E-01 | 9.567E-01 |
| RNF181       | 0.004 | 9.792E-01 | 3.334E-01 |
| WDR53        | 0.004 | 9.783E-01 | 6.877E-01 |
| CCDC184      | 0.004 | 9.926E-01 | 3.393E-01 |
| DNAL4        | 0.004 | 9.821E-01 | 5.107E-01 |
| FKBP15       | 0.004 | 9.752E-01 | 8.063E-01 |
| LMOD2        | 0.004 | 9.946E-01 | 4.198E-01 |
| AVEN         | 0.004 | 9.836E-01 | 9.125E-01 |
| TCTN3        | 0.004 | 9.733E-01 | 6.560E-01 |
| TLK2         | 0.004 | 9.719E-01 | 4.275E-01 |
| HERC2        | 0.004 | 9.792E-01 | 4.947E-01 |
| AK2          | 0.004 | 9.689E-01 | 9.305E-01 |
| WBP2NL       | 0.004 | 9.919E-01 | 6.020E-01 |
| CYP19A1      | 0.004 | 9.939E-01 | 4.976E-01 |
| FGD6         | 0.004 | 9.905E-01 | 8.560E-01 |
| STAT5B       | 0.004 | 9.759E-01 | 5.149E-01 |
| POF1B        | 0.004 | 9.946E-01 | 9.255E-01 |
| DUSP11       | 0.004 | 9.770E-01 | 4.002E-01 |
| SMARCA4      | 0.004 | 9.792E-01 | 8.033E-01 |
| ARL13A       | 0.004 | 9.919E-01 | 7.108E-01 |
| ZNF346       | 0.004 | 9.783E-01 | 7.654E-01 |
| SERPINI1     | 0.004 | 9.913E-01 | 6.017E-01 |
| NELFCD       | 0.004 | 9.785E-01 | 2.813E-01 |
| CDC42BPB     | 0.003 | 9.790E-01 | 7.035E-01 |
| MIR7850      | 0.003 | NA        | 5.930E-01 |
| KRTAP12-3    | 0.003 | NA        | 3.343E-01 |
| OR8B3        | 0.003 | NA        | 5.571E-01 |
| MIR6726      | 0.003 | NA        | 5.466E-01 |
| MIR6868      | 0.003 | NA        | 4.436E-01 |
| MIR7975      | 0.003 | NA        | 6.311E-01 |
| SPATA31D3    | 0.003 | NA        | 3.660E-01 |
| OR10G9       | 0.003 | NA        | 9.540E-01 |
| STEAP3       | 0.003 | 9.905E-01 | 8.429E-01 |
| ZBTB10       | 0.003 | 9.916E-01 | 5.669E-01 |
| CD302        | 0.003 | 9.905E-01 | 2.873E-01 |
| EIF4G2       | 0.003 | 9.779E-01 | 5.725E-01 |
| TAB2         | 0.003 | 9.784E-01 | 4.715E-01 |
| NF670-ZNF662 | 0.003 | 9.919E-01 | 6.735E-01 |
| DNAJC2       | 0.003 | 9.789E-01 | 3.937E-01 |
| UCK2         | 0.003 | 9.881E-01 | 5.844E-01 |
| UTP4         | 0.003 | 9.815E-01 | 5.332E-01 |
| SOD1         | 0.003 | 9.837E-01 | 4.814E-01 |
| ILVBL        | 0.003 | 9.861E-01 | 8.750E-01 |
| SYNE1        | 0.003 | 9.926E-01 | 3.163E-01 |
| CAB39L       | 0.003 | 9.945E-01 | 7.636E-01 |
| TMEM39B      | 0.003 | 9.801E-01 | 3.285E-01 |

|            |       |           |           |
|------------|-------|-----------|-----------|
| TBCE       | 0.003 | 9.785E-01 | 3.355E-01 |
| C8orf33    | 0.003 | 9.824E-01 | 7.007E-01 |
| ACRBP      | 0.003 | 9.935E-01 | 3.549E-01 |
| SELENOP    | 0.003 | 9.946E-01 | 9.844E-01 |
| EMC7       | 0.003 | 9.786E-01 | 9.804E-01 |
| OR10H2     | 0.003 | 9.973E-01 | 9.801E-01 |
| GABARAP    | 0.003 | 9.822E-01 | 9.768E-01 |
| LRRC25     | 0.003 | 9.946E-01 | 4.532E-01 |
| C16orf95   | 0.003 | 9.881E-01 | 4.280E-01 |
| TPD52L1    | 0.003 | 9.945E-01 | 3.725E-01 |
| DEK        | 0.003 | 9.916E-01 | 3.642E-01 |
| ANKRD36    | 0.003 | 9.942E-01 | 4.665E-01 |
| RFESD      | 0.003 | 9.881E-01 | 4.069E-01 |
| OTUD6B     | 0.003 | 9.873E-01 | 3.378E-01 |
| TMEM18     | 0.003 | 9.832E-01 | 6.815E-01 |
| CACNB1     | 0.003 | 9.930E-01 | 7.971E-01 |
| UMODL1     | 0.003 | 9.959E-01 | 7.258E-01 |
| RASGRP4    | 0.003 | 9.946E-01 | 5.543E-01 |
| HAUS6      | 0.003 | 9.909E-01 | 6.582E-01 |
| PSME4      | 0.003 | 9.809E-01 | 6.250E-01 |
| AC115220.1 | 0.003 | 9.987E-01 | 8.454E-01 |
| WRNIP1     | 0.003 | 9.847E-01 | 3.201E-01 |
| ECE2       | 0.003 | 9.918E-01 | 6.187E-01 |
| APOBEC3G   | 0.003 | 9.945E-01 | 3.152E-01 |
| GNA13      | 0.003 | 9.861E-01 | 2.932E-01 |
| ALDH4A1    | 0.003 | 9.942E-01 | 4.853E-01 |
| ANKRD39    | 0.003 | 9.874E-01 | 6.882E-01 |
| TSTD2      | 0.003 | 9.921E-01 | 6.459E-01 |
| KRTAP1-4   | 0.003 | NA        | 6.993E-01 |
| MIR1913    | 0.003 | NA        | 4.356E-01 |
| JUN        | 0.003 | 9.939E-01 | 9.283E-01 |
| PGP        | 0.003 | 9.905E-01 | 7.634E-01 |
| ZNF45      | 0.003 | 9.877E-01 | 5.209E-01 |
| KLF-CMTM   | 0.003 | 9.926E-01 | 3.284E-01 |
| KTN1       | 0.003 | 9.893E-01 | 6.251E-01 |
| PRMT2      | 0.002 | 9.833E-01 | 6.366E-01 |
| PHF2       | 0.002 | 9.864E-01 | 5.205E-01 |
| ABCF1      | 0.002 | 9.861E-01 | 3.507E-01 |
| PTPN23     | 0.002 | 9.846E-01 | 3.789E-01 |
| SLC25A24   | 0.002 | 9.916E-01 | 8.952E-01 |
| ADAMTS5    | 0.002 | 9.946E-01 | 8.483E-01 |
| SLC30A5    | 0.002 | 9.845E-01 | 9.472E-01 |
| CNOT4      | 0.002 | 9.809E-01 | 6.284E-01 |
| POLR2C     | 0.002 | 9.833E-01 | 4.881E-01 |
| TRPM7      | 0.002 | 9.883E-01 | 9.585E-01 |
| MIOS       | 0.002 | 9.873E-01 | 8.671E-01 |
| RNH1       | 0.002 | 9.892E-01 | 3.606E-01 |
| ERVMER34-1 | 0.002 | 9.958E-01 | 8.750E-01 |
| SMIM19     | 0.002 | 9.928E-01 | 7.644E-01 |
| PLTP       | 0.002 | 9.952E-01 | 5.020E-01 |

|         |       |           |           |
|---------|-------|-----------|-----------|
| GPC1    | 0.002 | 9.946E-01 | 4.896E-01 |
| NODAL   | 0.002 | 9.962E-01 | 5.129E-01 |
| TAS1R2  | 0.002 | NA        | 5.861E-01 |
| HEATR1  | 0.002 | 9.919E-01 | 3.697E-01 |
| BEX4    | 0.002 | 9.950E-01 | 3.966E-01 |
| KCTD2   | 0.002 | 9.877E-01 | 5.615E-01 |
| UBAP2L  | 0.002 | 9.874E-01 | 9.288E-01 |
| TSPAN33 | 0.002 | 9.947E-01 | 7.648E-01 |
| YEATS2  | 0.002 | 9.916E-01 | 6.572E-01 |
| SPOP    | 0.002 | 9.892E-01 | 9.871E-01 |
| CCDC40  | 0.002 | 9.946E-01 | 9.871E-01 |
| TUBD1   | 0.002 | 9.918E-01 | 9.871E-01 |
| BRIX1   | 0.002 | 9.926E-01 | 9.871E-01 |
| DYRK1B  | 0.002 | 9.946E-01 | 9.871E-01 |
| MUT     | 0.002 | 9.904E-01 | 9.871E-01 |
| AGO3    | 0.002 | 9.890E-01 | 9.871E-01 |
| PHKG2   | 0.002 | 9.926E-01 | 9.871E-01 |
| MIR613  | 0.002 | NA        | 9.871E-01 |
| TMEM131 | 0.002 | 9.916E-01 | 9.871E-01 |
| H3F3A   | 0.002 | 9.919E-01 | 9.871E-01 |
| ZNF800  | 0.002 | 9.894E-01 | 9.871E-01 |
| CBX2    | 0.002 | 9.963E-01 | 9.871E-01 |
| ZNF787  | 0.002 | 9.926E-01 | 9.871E-01 |
| KCTD6   | 0.002 | 9.941E-01 | 9.871E-01 |
| RNF187  | 0.002 | 9.911E-01 | 9.871E-01 |
| ATXN1L  | 0.002 | 9.942E-01 | 9.871E-01 |
| TMEM44  | 0.002 | 9.946E-01 | 9.871E-01 |
| PGLYRP3 | 0.002 | 9.982E-01 | 9.871E-01 |
| CHD2    | 0.001 | 9.926E-01 | 9.871E-01 |
| TMEM213 | 0.001 | 9.979E-01 | 9.871E-01 |
| ASXL1   | 0.001 | 9.930E-01 | 9.871E-01 |
| STK40   | 0.001 | 9.945E-01 | 9.871E-01 |
| RAB9A   | 0.001 | 9.946E-01 | 9.871E-01 |
| MIR6851 | 0.001 | NA        | 9.871E-01 |
| PEX6    | 0.001 | 9.949E-01 | 9.871E-01 |
| PDF     | 0.001 | 9.946E-01 | 9.871E-01 |
| CCDC86  | 0.001 | 9.946E-01 | 9.871E-01 |
| USH1G   | 0.001 | 9.981E-01 | 9.871E-01 |
| MC3R    | 0.001 | NA        | 9.871E-01 |
| SGSH    | 0.001 | 9.946E-01 | 9.871E-01 |
| PDCL3   | 0.001 | 9.936E-01 | 9.871E-01 |
| IMPA2   | 0.001 | 9.966E-01 | 9.871E-01 |
| SUMO1   | 0.001 | 9.919E-01 | 9.871E-01 |
| ESR1    | 0.001 | 9.977E-01 | 9.871E-01 |
| SLC15A4 | 0.001 | 9.945E-01 | 9.871E-01 |
| ORMDL2  | 0.001 | 9.946E-01 | 9.871E-01 |
| GALNT10 | 0.001 | 9.966E-01 | 9.871E-01 |
| CUTC    | 0.001 | 9.948E-01 | 9.871E-01 |
| JAG1    | 0.001 | 9.971E-01 | 9.871E-01 |
| R3HDM1  | 0.001 | 9.946E-01 | 9.871E-01 |

|            |       |           |           |
|------------|-------|-----------|-----------|
| AP1G1      | 0.001 | 9.946E-01 | 9.871E-01 |
| API5       | 0.001 | 9.945E-01 | 9.871E-01 |
| FAM229A    | 0.001 | 9.969E-01 | 9.871E-01 |
| ZNF555     | 0.001 | 9.956E-01 | 9.871E-01 |
| R3HDM2     | 0.001 | 9.946E-01 | 9.871E-01 |
| TRIP12     | 0.001 | 9.946E-01 | 9.871E-01 |
| MRPL9      | 0.001 | 9.952E-01 | 9.871E-01 |
| CD3EAP     | 0.001 | 9.961E-01 | 9.871E-01 |
| PSKH2      | 0.001 | NA        | 9.871E-01 |
| ISY1       | 0.001 | 9.946E-01 | 9.871E-01 |
| SNAP47     | 0.001 | 9.946E-01 | 9.871E-01 |
| PTPRG      | 0.001 | 9.970E-01 | 9.871E-01 |
| INTS12     | 0.001 | 9.946E-01 | 9.871E-01 |
| FIS1       | 0.001 | 9.958E-01 | 9.871E-01 |
| ATXN7L1    | 0.001 | 9.958E-01 | 9.871E-01 |
| ZNF490     | 0.001 | 9.970E-01 | 9.871E-01 |
| BUB1       | 0.001 | 9.971E-01 | 9.871E-01 |
| HMGB2      | 0.001 | 9.971E-01 | 9.871E-01 |
| FAM206A    | 0.001 | 9.962E-01 | 9.871E-01 |
| MIR4472-1  | 0.001 | NA        | 9.871E-01 |
| MIR6087    | 0.001 | NA        | 9.871E-01 |
| MIR6133    | 0.001 | NA        | 9.871E-01 |
| MIR208B    | 0.001 | NA        | 9.871E-01 |
| MIR520E    | 0.001 | NA        | 9.871E-01 |
| MIR7150    | 0.001 | NA        | 9.871E-01 |
| OR6N2      | 0.001 | NA        | 9.871E-01 |
| ZNF749     | 0.001 | 9.968E-01 | 9.871E-01 |
| PRKDC      | 0.001 | 9.970E-01 | 9.871E-01 |
| PLCXD1     | 0.001 | 9.979E-01 | 9.871E-01 |
| CNPY3      | 0.001 | 9.970E-01 | 9.871E-01 |
| TBX2       | 0.001 | 9.988E-01 | 3.388E-01 |
| LENG9      | 0.001 | 9.980E-01 | 7.616E-01 |
| MFN1       | 0.001 | 9.961E-01 | 8.268E-01 |
| AL159163.1 | 0.001 | 9.987E-01 | 4.068E-01 |
| UNC13B     | 0.001 | 9.978E-01 | 2.963E-01 |
| RIPPLY2    | 0.001 | 9.993E-01 | 3.707E-01 |
| ARHGAP32   | 0.000 | 9.982E-01 | 8.722E-01 |
| METTTL11B  | 0.000 | 9.993E-01 | 5.407E-01 |
| UBE3A      | 0.000 | 9.970E-01 | 8.387E-01 |
| 43896.000  | 0.000 | 9.976E-01 | 2.834E-01 |
| ZNF524     | 0.000 | 9.982E-01 | 3.397E-01 |
| LSM10      | 0.000 | 9.975E-01 | 3.507E-01 |
| KCNN2      | 0.000 | 9.993E-01 | 4.532E-01 |
| TRAPPC8    | 0.000 | 9.982E-01 | 5.509E-01 |
| VBP1       | 0.000 | 9.982E-01 | 4.737E-01 |
| CES5A      | 0.000 | 9.997E-01 | 3.329E-01 |
| REV3L      | 0.000 | 9.989E-01 | 5.650E-01 |
| DNAJC24    | 0.000 | 9.988E-01 | 3.103E-01 |
| MRPL19     | 0.000 | 9.986E-01 | 8.201E-01 |
| STK35      | 0.000 | 9.990E-01 | 3.318E-01 |

|           |        |           |           |
|-----------|--------|-----------|-----------|
| RWDD2B    | 0.000  | 9.990E-01 | 9.605E-01 |
| PPP1R3B   | 0.000  | 9.995E-01 | 9.619E-01 |
| GNL1      | 0.000  | 9.997E-01 | 5.295E-01 |
| GAGE10    | 0.000  | 9.999E-01 | 6.969E-01 |
| CCT3      | 0.000  | 9.997E-01 | 5.112E-01 |
| H2AFB2    | 0.000  | NA        | 8.471E-01 |
| KRTAP19-6 | 0.000  | NA        | 4.572E-01 |
| TBC1D15   | 0.000  | 9.999E-01 | 5.880E-01 |
| ALG2      | 0.000  | 9.998E-01 | 5.748E-01 |
| GATAD1    | 0.000  | 9.998E-01 | 2.742E-01 |
| ZNF771    | 0.000  | 9.997E-01 | 3.006E-01 |
| ASMTL     | 0.000  | 9.997E-01 | 4.438E-01 |
| LRG1      | 0.000  | 9.998E-01 | 2.846E-01 |
| SUPT7L    | 0.000  | 9.985E-01 | 7.897E-01 |
| IDH1      | 0.000  | 9.994E-01 | 3.486E-01 |
| PATJ      | 0.000  | 9.991E-01 | 4.982E-01 |
| RAB19     | 0.000  | 9.994E-01 | 4.849E-01 |
| PCNP      | 0.000  | 9.978E-01 | 5.102E-01 |
| PATE3     | 0.000  | NA        | 2.020E-01 |
| TAT       | 0.000  | 9.994E-01 | 8.156E-01 |
| MRO       | 0.000  | 9.994E-01 | 8.369E-01 |
| SAP30L    | 0.000  | 9.976E-01 | 8.608E-01 |
| RPP38     | 0.000  | 9.981E-01 | 6.189E-01 |
| PABPC4    | 0.000  | 9.987E-01 | 4.743E-01 |
| NSUN2     | 0.000  | 9.981E-01 | 6.570E-01 |
| CATSPERZ  | 0.000  | 9.994E-01 | 4.246E-01 |
| RUNDC1    | 0.000  | 9.971E-01 | 4.213E-01 |
| MYH7B     | -0.001 | 9.982E-01 | 4.727E-01 |
| MRT04     | -0.001 | 9.968E-01 | 3.891E-01 |
| FAM149B1  | -0.001 | 9.959E-01 | 8.126E-01 |
| COA4      | -0.001 | 9.968E-01 | 8.275E-01 |
| ZNF341    | -0.001 | 9.970E-01 | 6.238E-01 |
| GLRX5     | -0.001 | 9.962E-01 | 4.113E-01 |
| CPSF4     | -0.001 | 9.963E-01 | 4.288E-01 |
| ACTL10    | -0.001 | 9.982E-01 | 9.653E-01 |
| PPIL1     | -0.001 | 9.963E-01 | 5.440E-01 |
| ANKFY1    | -0.001 | 9.962E-01 | 8.779E-01 |
| ADGRG6    | -0.001 | 9.982E-01 | 4.495E-01 |
| TMEM234   | -0.001 | 9.963E-01 | 5.331E-01 |
| LGALS1    | -0.001 | 9.975E-01 | 9.395E-01 |
| DTL       | -0.001 | 9.971E-01 | 3.785E-01 |
| EARS2     | -0.001 | 9.961E-01 | 9.537E-01 |
| USP33     | -0.001 | 9.955E-01 | 4.157E-01 |
| UBXN7     | -0.001 | 9.958E-01 | 8.301E-01 |
| DNAJC16   | -0.001 | 9.951E-01 | 8.087E-01 |
| PEAR1     | -0.001 | 9.970E-01 | 5.748E-01 |
| MMS19     | -0.001 | 9.946E-01 | 4.748E-01 |
| ZNF551    | -0.001 | 9.962E-01 | 4.919E-01 |
| NIPAL3    | -0.001 | 9.958E-01 | 4.235E-01 |
| FBXO45    | -0.001 | 9.960E-01 | 4.000E-01 |

|          |        |           |           |
|----------|--------|-----------|-----------|
| SGTA     | -0.001 | 9.949E-01 | 5.993E-01 |
| HELZ     | -0.001 | 9.946E-01 | 4.230E-01 |
| NRAS     | -0.001 | 9.958E-01 | 5.781E-01 |
| PABPC1L  | -0.001 | 9.970E-01 | 9.843E-01 |
| INVS     | -0.001 | 9.946E-01 | 9.831E-01 |
| DNAJC5   | -0.001 | 9.950E-01 | 9.829E-01 |
| PPM1M    | -0.001 | 9.961E-01 | 9.816E-01 |
| TMEM201  | -0.001 | 9.946E-01 | 9.812E-01 |
| MGST1    | -0.001 | 9.970E-01 | 9.801E-01 |
| KLHL28   | -0.001 | 9.950E-01 | 9.800E-01 |
| SMARCE1  | -0.001 | 9.946E-01 | 9.799E-01 |
| MIR3127  | -0.001 | NA        | 4.014E-01 |
| H2BFM    | -0.001 | 9.987E-01 | 3.196E-01 |
| RARG     | -0.001 | 9.959E-01 | 4.808E-01 |
| ZNF830   | -0.001 | 9.931E-01 | 2.641E-01 |
| AZU1     | -0.001 | 9.971E-01 | 8.812E-01 |
| LRBA     | -0.001 | 9.946E-01 | 6.983E-01 |
| CAPN13   | -0.001 | 9.982E-01 | 6.026E-01 |
| TAS2R20  | -0.001 | 9.962E-01 | 7.169E-01 |
| TBC1D25  | -0.001 | 9.928E-01 | 3.940E-01 |
| BCL2L2   | -0.001 | 9.945E-01 | 4.355E-01 |
| TBC1D3C  | -0.001 | NA        | 3.725E-01 |
| GLIPR1L2 | -0.001 | 9.963E-01 | 5.317E-01 |
| CEP250   | -0.001 | 9.945E-01 | 5.095E-01 |
| MRPL58   | -0.001 | 9.931E-01 | 4.071E-01 |
| MBD2     | -0.001 | 9.928E-01 | 5.015E-01 |
| USF3     | -0.001 | 9.942E-01 | 6.268E-01 |
| PITPNC1  | -0.001 | 9.946E-01 | 4.493E-01 |
| CMIP     | -0.001 | 9.945E-01 | 4.642E-01 |
| CT83     | -0.002 | 9.991E-01 | 5.161E-01 |
| PLEKHM1  | -0.002 | 9.926E-01 | 4.012E-01 |
| MIR6076  | -0.002 | NA        | 8.727E-01 |
| PDC      | -0.002 | 9.971E-01 | 8.156E-01 |
| CENPO    | -0.002 | 9.942E-01 | 4.158E-01 |
| MDH1B    | -0.002 | 9.960E-01 | 4.363E-01 |
| LLGL1    | -0.002 | 9.935E-01 | 8.306E-01 |
| RNF149   | -0.002 | 9.922E-01 | 9.513E-01 |
| ZNF322   | -0.002 | 9.939E-01 | 5.698E-01 |
| LTN1     | -0.002 | 9.930E-01 | 9.782E-01 |
| SLC4A7   | -0.002 | 9.946E-01 | 4.149E-01 |
| SLC6A17  | -0.002 | 9.970E-01 | 5.054E-01 |
| SYT2     | -0.002 | 9.962E-01 | 4.922E-01 |
| XPA      | -0.002 | 9.909E-01 | 4.254E-01 |
| AIRE     | -0.002 | 9.970E-01 | 4.400E-01 |
| NT5E     | -0.002 | 9.969E-01 | 6.483E-01 |
| NGF      | -0.002 | 9.968E-01 | 4.452E-01 |
| CAP1     | -0.002 | 9.930E-01 | 4.405E-01 |
| ZNF878   | -0.002 | 9.951E-01 | 6.494E-01 |
| SEH1L    | -0.002 | 9.919E-01 | 4.002E-01 |
| MXD3     | -0.002 | 9.946E-01 | 7.873E-01 |



|            |        |           |           |
|------------|--------|-----------|-----------|
| CDC14A     | -0.002 | 9.942E-01 | 5.966E-01 |
| MTIF2      | -0.002 | 9.871E-01 | 5.147E-01 |
| TAL2       | -0.002 | 9.967E-01 | 4.805E-01 |
| BZW1       | -0.002 | 9.915E-01 | 6.370E-01 |
| BDKRB1     | -0.002 | 9.962E-01 | 7.287E-01 |
| SLC15A1    | -0.002 | 9.968E-01 | 5.544E-01 |
| MIR3908    | -0.002 | NA        | 3.602E-01 |
| MIR182     | -0.002 | NA        | 7.683E-01 |
| MIR4459    | -0.002 | NA        | 6.769E-01 |
| MIR4772    | -0.002 | NA        | 3.887E-01 |
| SCGB1D1    | -0.002 | NA        | 8.137E-01 |
| ZC3H11B    | -0.002 | 9.958E-01 | 4.388E-01 |
| SEMA6B     | -0.002 | 9.946E-01 | 5.022E-01 |
| MIR4665    | -0.002 | NA        | 3.163E-01 |
| KIAA0319L  | -0.002 | 9.856E-01 | 7.428E-01 |
| AL365273.2 | -0.002 | NA        | 3.815E-01 |
| SMIM13     | -0.002 | 9.911E-01 | 3.797E-01 |
| CSMD1      | -0.002 | 9.971E-01 | 5.718E-01 |
| CEP19      | -0.002 | 9.939E-01 | 3.941E-01 |
| CEP192     | -0.002 | 9.913E-01 | 9.054E-01 |
| NSUN4      | -0.002 | 9.837E-01 | 4.273E-01 |
| CGGBP1     | -0.002 | 9.875E-01 | 4.110E-01 |
| FCGR2A     | -0.002 | 9.957E-01 | 8.157E-01 |
| PAPD7      | -0.002 | 9.898E-01 | 3.894E-01 |
| MRPL36     | -0.002 | 9.919E-01 | 5.155E-01 |
| PCID2      | -0.002 | 9.837E-01 | 8.855E-01 |
| ZNF227     | -0.002 | 9.861E-01 | 6.436E-01 |
| BIN1       | -0.002 | 9.947E-01 | 3.252E-01 |
| PABPC5     | -0.002 | 9.956E-01 | 5.087E-01 |
| C19orf48   | -0.002 | 9.918E-01 | 4.536E-01 |
| AP4S1      | -0.002 | 9.895E-01 | 4.582E-01 |
| ZNF197     | -0.002 | 9.845E-01 | 9.667E-01 |
| RGL1       | -0.003 | 9.942E-01 | 9.669E-01 |
| ZDBF2      | -0.003 | 9.952E-01 | 9.681E-01 |
| UTP14C     | -0.003 | 9.889E-01 | 9.734E-01 |
| SURF6      | -0.003 | 9.858E-01 | 3.741E-01 |
| NKRF       | -0.003 | 9.833E-01 | 7.959E-01 |
| HCCS       | -0.003 | 9.847E-01 | 6.926E-01 |
| RSPRY1     | -0.003 | 9.815E-01 | 8.374E-01 |
| ABHD2      | -0.003 | 9.939E-01 | 7.449E-01 |
| LHX1       | -0.003 | 9.971E-01 | 5.133E-01 |
| MUSK       | -0.003 | 9.952E-01 | 5.784E-01 |
| MIR6500    | -0.003 | NA        | 3.958E-01 |
| EXOC3      | -0.003 | 9.874E-01 | 7.200E-01 |
| HACE1      | -0.003 | 9.889E-01 | 4.999E-01 |
| GLI2       | -0.003 | 9.950E-01 | 4.181E-01 |
| LHFPL5     | -0.003 | 9.958E-01 | 3.808E-01 |
| APOBEC3C   | -0.003 | 9.911E-01 | 5.044E-01 |
| MIEF2      | -0.003 | 9.847E-01 | 8.324E-01 |
| NPR3       | -0.003 | 9.946E-01 | 3.451E-01 |

|            |        |           |           |
|------------|--------|-----------|-----------|
| CARS       | -0.003 | 9.821E-01 | 3.495E-01 |
| G0S2       | -0.003 | 9.951E-01 | 5.066E-01 |
| APH1B      | -0.003 | 9.877E-01 | 4.190E-01 |
| ZBTB20     | -0.003 | 9.892E-01 | 5.616E-01 |
| BCAS3      | -0.003 | 9.861E-01 | 5.132E-01 |
| DHX16      | -0.003 | 9.783E-01 | 3.330E-01 |
| MYBPC3     | -0.003 | 9.941E-01 | 3.516E-01 |
| MZT1       | -0.003 | 9.861E-01 | 6.696E-01 |
| CDKN1A     | -0.003 | 9.922E-01 | 7.087E-01 |
| DCTN2      | -0.003 | 9.751E-01 | 8.561E-01 |
| NXPE3      | -0.003 | 9.919E-01 | 5.300E-01 |
| METTTL27   | -0.003 | 9.945E-01 | 5.299E-01 |
| TRIP10     | -0.003 | 9.869E-01 | 6.194E-01 |
| CPA5       | -0.003 | 9.946E-01 | 7.560E-01 |
| WWOX       | -0.003 | 9.885E-01 | 8.001E-01 |
| MYO9B      | -0.003 | 9.763E-01 | 6.232E-01 |
| MFN2       | -0.003 | 9.785E-01 | 3.816E-01 |
| KRTCAP2    | -0.003 | 9.843E-01 | 8.363E-01 |
| GPR158     | -0.003 | 9.953E-01 | 4.934E-01 |
| ZNF626     | -0.003 | 9.947E-01 | 5.184E-01 |
| SARDH      | -0.003 | 9.938E-01 | 7.426E-01 |
| OCEL1      | -0.003 | 9.881E-01 | 8.671E-01 |
| OR2D3      | -0.004 | NA        | 9.428E-01 |
| ZNF404     | -0.004 | 9.911E-01 | 4.620E-01 |
| ANP32B     | -0.004 | 9.837E-01 | 6.024E-01 |
| ATG9A      | -0.004 | 9.796E-01 | 3.955E-01 |
| KRTAP10-1  | -0.004 | NA        | 4.470E-01 |
| LRRFIP1    | -0.004 | 9.828E-01 | 6.698E-01 |
| MYL10      | -0.004 | 9.957E-01 | 7.876E-01 |
| SOX9       | -0.004 | 9.946E-01 | 4.838E-01 |
| SON        | -0.004 | 9.783E-01 | 4.356E-01 |
| GPR84      | -0.004 | 9.945E-01 | 8.589E-01 |
| GJE1       | -0.004 | NA        | 5.003E-01 |
| MIR3692    | -0.004 | NA        | 5.727E-01 |
| MIR4309    | -0.004 | NA        | 5.242E-01 |
| MIR4447    | -0.004 | NA        | 7.060E-01 |
| MIR548AZ   | -0.004 | NA        | 3.056E-01 |
| MIR6134    | -0.004 | NA        | 9.471E-01 |
| OR4D11     | -0.004 | NA        | 9.883E-01 |
| AC013269.1 | -0.004 | NA        | 9.856E-01 |
| FAM236D    | -0.004 | NA        | 9.856E-01 |
| MIR4760    | -0.004 | NA        | 9.854E-01 |
| MIR4790    | -0.004 | NA        | 9.842E-01 |
| MIR548I3   | -0.004 | NA        | 3.878E-01 |
| MIR651     | -0.004 | NA        | 5.502E-01 |
| MIR6724-2  | -0.004 | NA        | 6.762E-01 |
| OR10H3     | -0.004 | NA        | 4.535E-01 |
| OR10T2     | -0.004 | NA        | 4.834E-01 |
| OR11H1     | -0.004 | NA        | 4.028E-01 |
| OR1S2      | -0.004 | NA        | 7.684E-01 |

|               |        |           |           |
|---------------|--------|-----------|-----------|
| OR4C11        | -0.004 | NA        | 4.867E-01 |
| isa-mir-548d- | -0.004 | NA        | 7.148E-01 |
| MIR1283-1     | -0.004 | NA        | 4.815E-01 |
| MIR1302-4     | -0.004 | NA        | 5.551E-01 |
| MIR516B1      | -0.004 | NA        | 3.879E-01 |
| MIR6846       | -0.004 | NA        | 4.576E-01 |
| MIR8075       | -0.004 | NA        | 8.081E-01 |
| MIR873        | -0.004 | NA        | 5.587E-01 |
| MIR5787       | -0.004 | NA        | 3.885E-01 |
| TMOD4         | -0.004 | NA        | 6.193E-01 |
| MIR938        | -0.004 | NA        | 6.405E-01 |
| CTBS          | -0.004 | 9.810E-01 | 6.690E-01 |
| LRRCC1        | -0.004 | 9.874E-01 | 6.752E-01 |
| RNF7          | -0.004 | 9.749E-01 | 5.662E-01 |
| ZSCAN31       | -0.004 | 9.919E-01 | 5.065E-01 |
| GSTM3         | -0.004 | 9.946E-01 | 4.889E-01 |
| USP53         | -0.004 | 9.867E-01 | 3.911E-01 |
| TANC1         | -0.004 | 9.828E-01 | 4.647E-01 |
| CUL4A         | -0.004 | 9.752E-01 | 5.171E-01 |
| DEFB132       | -0.004 | NA        | 7.830E-01 |
| LSM8          | -0.004 | 9.749E-01 | 3.673E-01 |
| FLVCR2        | -0.004 | 9.910E-01 | 5.655E-01 |
| NEMF          | -0.004 | 9.826E-01 | 4.160E-01 |
| GFER          | -0.004 | 9.795E-01 | 5.686E-01 |
| DIAPH2        | -0.004 | 9.874E-01 | 3.713E-01 |
| BANF1         | -0.004 | 9.784E-01 | 5.285E-01 |
| ACTR3C        | -0.004 | 9.893E-01 | 9.314E-01 |
| SPHK2         | -0.004 | 9.874E-01 | 5.161E-01 |
| TMEM186       | -0.004 | 9.837E-01 | 4.183E-01 |
| PPP1R3E       | -0.004 | 9.856E-01 | 6.989E-01 |
| SCNN1A        | -0.004 | 9.946E-01 | 9.013E-01 |
| WNK1          | -0.004 | 9.804E-01 | 3.940E-01 |
| Z98752.3      | -0.004 | NA        | 5.405E-01 |
| ZNF383        | -0.004 | 9.792E-01 | 4.844E-01 |
| GTF2A1        | -0.004 | 9.749E-01 | 4.233E-01 |
| TOMM5         | -0.004 | 9.828E-01 | 4.316E-01 |
| TYW1B         | -0.004 | 9.874E-01 | 4.442E-01 |
| UBE2D1        | -0.004 | 9.749E-01 | 4.763E-01 |
| IL7R          | -0.004 | 9.942E-01 | 4.866E-01 |
| CPSF7         | -0.004 | 9.614E-01 | 6.422E-01 |
| ZDHHC16       | -0.004 | 9.711E-01 | 5.447E-01 |
| PIGN          | -0.004 | 9.792E-01 | 4.565E-01 |
| MIR553        | -0.004 | 9.946E-01 | 5.534E-01 |
| TIMM17B       | -0.004 | 9.787E-01 | 5.518E-01 |
| HMGA2         | -0.004 | 9.957E-01 | 5.145E-01 |
| THOP1         | -0.004 | 9.821E-01 | 7.974E-01 |
| C1QA          | -0.004 | 9.942E-01 | 8.625E-01 |
| NHLH1         | -0.004 | 9.918E-01 | 3.707E-01 |
| RAB40C        | -0.004 | 9.813E-01 | 5.548E-01 |
| NDUFA5        | -0.005 | 9.692E-01 | 4.561E-01 |

|            |        |           |           |
|------------|--------|-----------|-----------|
| TMEM59     | -0.005 | 9.749E-01 | 2.297E-01 |
| TMEM38B    | -0.005 | 9.861E-01 | 5.962E-01 |
| SUMO2      | -0.005 | 9.641E-01 | 7.704E-01 |
| RAB4A      | -0.005 | 9.700E-01 | 5.311E-01 |
| MIR548A3   | -0.005 | NA        | 6.884E-01 |
| CAGE1      | -0.005 | 9.945E-01 | 6.931E-01 |
| AC233992.2 | -0.005 | 9.916E-01 | 6.481E-01 |
| MIR609     | -0.005 | NA        | 7.279E-01 |
| MIR4655    | -0.005 | NA        | 5.375E-01 |
| DNAAF1     | -0.005 | 9.902E-01 | 7.829E-01 |
| NR1I3      | -0.005 | 9.885E-01 | 3.989E-01 |
| INTS11     | -0.005 | 9.713E-01 | 5.222E-01 |
| TARDBP     | -0.005 | 9.380E-01 | 4.828E-01 |
| SPATA31D1  | -0.005 | NA        | 7.290E-01 |
| UNC50      | -0.005 | 9.667E-01 | 5.527E-01 |
| CTCF       | -0.005 | 9.593E-01 | 7.956E-01 |
| NOTCH3     | -0.005 | 9.837E-01 | 6.472E-01 |
| WHRN       | -0.005 | 9.849E-01 | 8.193E-01 |
| LEF1       | -0.005 | 9.895E-01 | 8.227E-01 |
| CNOT1      | -0.005 | 9.758E-01 | 7.239E-01 |
| IFT74      | -0.005 | 9.785E-01 | 4.259E-01 |
| SRBD1      | -0.005 | 9.680E-01 | 9.761E-01 |
| AL662899.1 | -0.005 | NA        | 9.738E-01 |
| TMEM183A   | -0.005 | 9.580E-01 | 5.768E-01 |
| NPIP7      | -0.005 | 9.928E-01 | 9.714E-01 |
| CEP170     | -0.005 | 9.809E-01 | 9.713E-01 |
| MIR8064    | -0.005 | NA        | 2.927E-01 |
| PIP5K1C    | -0.005 | 9.642E-01 | 6.709E-01 |
| AC126755.2 | -0.005 | 9.909E-01 | 4.853E-01 |
| ELP4       | -0.005 | 9.714E-01 | 4.930E-01 |
| KBTBD2     | -0.005 | 9.600E-01 | 7.936E-01 |
| TRPC6      | -0.005 | 9.869E-01 | 4.500E-01 |
| ECD        | -0.005 | 9.612E-01 | 7.947E-01 |
| FAM122A    | -0.005 | 9.640E-01 | 8.911E-01 |
| UBA5       | -0.005 | 9.587E-01 | 6.655E-01 |
| DCP1B      | -0.005 | 9.783E-01 | 5.385E-01 |
| GOLGA6L1   | -0.005 | NA        | 7.700E-01 |
| ARHGEF12   | -0.005 | 9.718E-01 | 8.609E-01 |
| RGP1       | -0.005 | 9.774E-01 | 4.623E-01 |
| MIR548Y    | -0.005 | NA        | 5.977E-01 |
| OLFM1      | -0.006 | 9.918E-01 | 5.241E-01 |
| DUSP1      | -0.006 | 9.884E-01 | 6.837E-01 |
| CDC34      | -0.006 | 9.756E-01 | 5.580E-01 |
| HAVCR1     | -0.006 | 9.949E-01 | 5.736E-01 |
| C8orf76    | -0.006 | 9.671E-01 | 5.123E-01 |
| HSD11B1L   | -0.006 | 9.829E-01 | 7.580E-01 |
| CCT4       | -0.006 | 9.733E-01 | 5.612E-01 |
| AZIN2      | -0.006 | 9.828E-01 | 6.954E-01 |
| HIST2H2AA3 | -0.006 | 9.949E-01 | 8.835E-01 |
| COL9A2     | -0.006 | 9.905E-01 | 5.546E-01 |

|           |        |           |           |
|-----------|--------|-----------|-----------|
| TRPV6     | -0.006 | 9.928E-01 | 4.829E-01 |
| SRPK2     | -0.006 | 9.676E-01 | 7.583E-01 |
| PAPOLG    | -0.006 | 9.601E-01 | 5.019E-01 |
| MIR1255A  | -0.006 | NA        | 6.272E-01 |
| TXNL4B    | -0.006 | 9.692E-01 | 5.778E-01 |
| SUPT16H   | -0.006 | 9.669E-01 | 3.496E-01 |
| PHF3      | -0.006 | 9.705E-01 | 8.635E-01 |
| C1orf109  | -0.006 | 9.681E-01 | 4.745E-01 |
| KDM1A     | -0.006 | 9.711E-01 | 4.861E-01 |
| SYCE2     | -0.006 | 9.856E-01 | 5.809E-01 |
| TIMM17A   | -0.006 | 9.621E-01 | 6.521E-01 |
| FAM78A    | -0.006 | 9.874E-01 | 5.416E-01 |
| CTAGE15   | -0.006 | 9.936E-01 | 6.160E-01 |
| GNPTG     | -0.006 | 9.689E-01 | 6.244E-01 |
| ZNF786    | -0.006 | 9.673E-01 | 4.283E-01 |
| KIAA0368  | -0.006 | 9.626E-01 | 6.609E-01 |
| MIR4663   | -0.006 | NA        | 5.537E-01 |
| FRMD4B    | -0.006 | 9.837E-01 | 3.372E-01 |
| COX20     | -0.006 | 9.689E-01 | 5.262E-01 |
| RDH8      | -0.006 | 9.945E-01 | 5.005E-01 |
| VSIR      | -0.006 | 9.825E-01 | 4.359E-01 |
| TM6SF1    | -0.006 | 9.847E-01 | 4.607E-01 |
| MTMR4     | -0.006 | 9.721E-01 | 6.153E-01 |
| PIN1      | -0.006 | 9.667E-01 | 8.967E-01 |
| SERPING1  | -0.006 | 9.881E-01 | 4.414E-01 |
| ING1      | -0.006 | 9.647E-01 | 9.743E-01 |
| COX6B1    | -0.006 | 9.743E-01 | 7.051E-01 |
| RNF8      | -0.006 | 9.587E-01 | 3.593E-01 |
| CCM2L     | -0.006 | 9.823E-01 | 5.934E-01 |
| ATP6V1G1  | -0.006 | 9.580E-01 | 4.917E-01 |
| MAP4K3    | -0.006 | 9.752E-01 | 3.100E-01 |
| ZC3HC1    | -0.006 | 9.568E-01 | 4.676E-01 |
| PCDHA13   | -0.006 | 9.946E-01 | 4.675E-01 |
| ATP6V1H   | -0.006 | 9.601E-01 | 7.063E-01 |
| MED25     | -0.006 | 9.619E-01 | 6.520E-01 |
| SNTA1     | -0.006 | 9.807E-01 | 7.700E-01 |
| C17orf53  | -0.006 | 9.763E-01 | 9.890E-01 |
| KRTAP4-11 | -0.006 | NA        | 9.890E-01 |
| MED30     | -0.006 | 9.692E-01 | 9.890E-01 |
| ZNF527    | -0.006 | 9.691E-01 | 9.890E-01 |
| PUS3      | -0.006 | 9.621E-01 | 9.890E-01 |
| HMBS      | -0.006 | 9.694E-01 | 9.890E-01 |
| MIR556    | -0.006 | NA        | 9.890E-01 |
| NUDT2     | -0.006 | 9.718E-01 | 9.890E-01 |
| SCG2      | -0.006 | 9.915E-01 | 9.890E-01 |
| MIR3659   | -0.006 | NA        | 9.890E-01 |
| MIR4716   | -0.006 | NA        | 9.890E-01 |
| OR2AP1    | -0.006 | NA        | 9.890E-01 |
| DEFB105A  | -0.006 | NA        | 9.890E-01 |
| MIR3663   | -0.006 | NA        | 9.890E-01 |

|            |        |           |           |
|------------|--------|-----------|-----------|
| MIR4529    | -0.006 | NA        | 9.890E-01 |
| MIR5698    | -0.006 | NA        | 9.890E-01 |
| MIR6802    | -0.006 | NA        | 9.890E-01 |
| OR4L1      | -0.006 | NA        | 5.713E-01 |
| OR52M1     | -0.006 | NA        | 5.423E-01 |
| KRTAP13-1  | -0.006 | NA        | 4.427E-01 |
| MIR183     | -0.006 | NA        | 5.930E-01 |
| OR11L1     | -0.006 | NA        | 6.851E-01 |
| OR2M7      | -0.006 | NA        | 5.034E-01 |
| OR4C15     | -0.006 | NA        | 9.625E-01 |
| MIR1289-2  | -0.006 | NA        | 5.613E-01 |
| MIR511     | -0.006 | NA        | 4.893E-01 |
| MFAP1      | -0.006 | 9.489E-01 | 4.900E-01 |
| NCBP2-AS2  | -0.006 | 9.690E-01 | 6.964E-01 |
| ZFR        | -0.006 | 9.528E-01 | 8.504E-01 |
| ABCB7      | -0.006 | 9.619E-01 | 4.970E-01 |
| HIST1H2BE  | -0.006 | 9.881E-01 | 5.584E-01 |
| CDK13      | -0.007 | 9.506E-01 | 5.143E-01 |
| MIER1      | -0.007 | 9.508E-01 | 8.417E-01 |
| MARCKS     | -0.007 | 9.678E-01 | 7.287E-01 |
| SIN3A      | -0.007 | 9.454E-01 | 4.449E-01 |
| MFSD6L     | -0.007 | 9.921E-01 | 5.916E-01 |
| HADHB      | -0.007 | 9.598E-01 | 8.491E-01 |
| PRR23C     | -0.007 | NA        | 3.078E-01 |
| ACADS      | -0.007 | 9.709E-01 | 3.683E-01 |
| MAP3K14    | -0.007 | 9.774E-01 | 8.264E-01 |
| ANKRD61    | -0.007 | 9.770E-01 | 6.707E-01 |
| CEP72      | -0.007 | 9.764E-01 | 8.082E-01 |
| BTN2A1     | -0.007 | 9.593E-01 | 5.047E-01 |
| ZSCAN21    | -0.007 | 9.586E-01 | 7.857E-01 |
| DTX4       | -0.007 | 9.828E-01 | 7.429E-01 |
| MIS18A     | -0.007 | 9.692E-01 | 5.065E-01 |
| FNIP1      | -0.007 | 9.567E-01 | 6.478E-01 |
| ALKBH8     | -0.007 | 9.619E-01 | 4.875E-01 |
| AC096887.1 | -0.007 | 9.733E-01 | 5.817E-01 |
| CREBBP     | -0.007 | 9.579E-01 | 4.440E-01 |
| NOLC1      | -0.007 | 9.612E-01 | 7.643E-01 |
| PRR12      | -0.007 | 9.587E-01 | 5.536E-01 |
| EIF2AK4    | -0.007 | 9.521E-01 | 9.727E-01 |
| LMO7DN     | -0.007 | 9.919E-01 | 5.868E-01 |
| DDX59      | -0.007 | 9.524E-01 | 3.552E-01 |
| MIR2355    | -0.007 | NA        | 4.055E-01 |
| MIR627     | -0.007 | NA        | 8.142E-01 |
| ATP5C1     | -0.007 | 9.631E-01 | 6.480E-01 |
| COG2       | -0.007 | 9.466E-01 | 4.878E-01 |
| TCEA1      | -0.007 | 9.523E-01 | 6.877E-01 |
| GAL        | -0.007 | 9.930E-01 | 8.670E-01 |
| URM1       | -0.007 | 9.592E-01 | 6.009E-01 |
| USP16      | -0.007 | 9.479E-01 | 3.973E-01 |
| KDM4C      | -0.007 | 9.579E-01 | 4.276E-01 |

|            |        |           |           |
|------------|--------|-----------|-----------|
| AP3D1      | -0.007 | 9.399E-01 | 4.903E-01 |
| MIR4711    | -0.007 | NA        | 5.210E-01 |
| AC110275.1 | -0.007 | NA        | 4.934E-01 |
| MDH2       | -0.007 | 9.554E-01 | 4.136E-01 |
| MIR4659A   | -0.007 | NA        | 5.075E-01 |
| RBM18      | -0.007 | 9.483E-01 | 9.410E-01 |
| OR51Q1     | -0.007 | 9.946E-01 | 4.628E-01 |
| TIMM29     | -0.007 | 9.479E-01 | 3.691E-01 |
| EIF2B5     | -0.008 | 9.446E-01 | 7.217E-01 |
| CC2D1B     | -0.008 | 9.452E-01 | 7.884E-01 |
| MID1IP1    | -0.008 | 9.713E-01 | 5.639E-01 |
| IMMP1L     | -0.008 | 9.600E-01 | 4.367E-01 |
| DENND1B    | -0.008 | 9.601E-01 | 5.651E-01 |
| STAU2      | -0.008 | 9.600E-01 | 4.210E-01 |
| WDFY3      | -0.008 | 9.600E-01 | 6.914E-01 |
| USP7       | -0.008 | 9.600E-01 | 4.945E-01 |
| TMEM105    | -0.008 | 9.861E-01 | 3.939E-01 |
| SF3A3      | -0.008 | 9.446E-01 | 8.470E-01 |
| TOX2       | -0.008 | 9.861E-01 | 3.813E-01 |
| USP17L2    | -0.008 | NA        | 7.633E-01 |
| ETV2       | -0.008 | 9.766E-01 | 4.883E-01 |
| SPATA5     | -0.008 | 9.558E-01 | 7.169E-01 |
| ZNF106     | -0.008 | 9.600E-01 | 5.426E-01 |
| TMEM251    | -0.008 | 9.527E-01 | 7.058E-01 |
| LRWD1      | -0.008 | 9.519E-01 | 6.924E-01 |
| ANKRD36B   | -0.008 | 9.792E-01 | 5.739E-01 |
| ZBTB8OS    | -0.008 | 9.453E-01 | 9.089E-01 |
| NLGN4Y     | -0.008 | 9.926E-01 | 7.916E-01 |
| FAM83A     | -0.008 | 9.900E-01 | 9.803E-01 |
| MCM3AP     | -0.008 | 9.481E-01 | 9.779E-01 |
| C1orf123   | -0.008 | 9.468E-01 | 9.767E-01 |
| ZNF569     | -0.008 | 9.751E-01 | 9.767E-01 |
| LIPC       | -0.008 | 9.890E-01 | 9.757E-01 |
| NAT6       | -0.008 | 9.641E-01 | 4.890E-01 |
| SLC24A1    | -0.008 | 9.621E-01 | 3.813E-01 |
| UBFD1      | -0.008 | 9.513E-01 | 4.682E-01 |
| ATF7IP     | -0.008 | 9.459E-01 | 8.705E-01 |
| ZNF675     | -0.008 | 9.749E-01 | 3.867E-01 |
| INSL4      | -0.008 | 9.946E-01 | 5.681E-01 |
| MIR3126    | -0.008 | NA        | 6.376E-01 |
| DIABLO     | -0.008 | 9.381E-01 | 5.675E-01 |
| NEK9       | -0.008 | 9.498E-01 | 3.893E-01 |
| KCNK16     | -0.008 | NA        | 5.868E-01 |
| CRYAA      | -0.008 | NA        | 6.093E-01 |
| STX8       | -0.008 | 9.586E-01 | 8.492E-01 |
| RBM7       | -0.008 | 9.452E-01 | 5.972E-01 |
| ANKDD1A    | -0.008 | 9.749E-01 | 7.549E-01 |
| INO80E     | -0.008 | 9.579E-01 | 7.779E-01 |
| ARHGEF5    | -0.008 | 9.715E-01 | 4.298E-01 |
| TBCCD1     | -0.008 | 9.501E-01 | 6.925E-01 |

|            |        |           |           |
|------------|--------|-----------|-----------|
| ATP13A2    | -0.008 | 9.543E-01 | 4.796E-01 |
| CENPE      | -0.008 | 9.718E-01 | 5.826E-01 |
| PLEKHA3    | -0.008 | 9.373E-01 | 3.198E-01 |
| RAB3GAP1   | -0.009 | 9.349E-01 | 6.464E-01 |
| AC005020.2 | -0.009 | 9.861E-01 | 4.348E-01 |
| CCDC90B    | -0.009 | 9.444E-01 | 6.675E-01 |
| ZNF687     | -0.009 | 9.550E-01 | 4.002E-01 |
| TMEM184C   | -0.009 | 9.481E-01 | 4.575E-01 |
| ZBED1      | -0.009 | 9.586E-01 | 4.093E-01 |
| EPX        | -0.009 | 9.802E-01 | 5.985E-01 |
| OR2A1      | -0.009 | 9.919E-01 | 3.921E-01 |
| NFKB2      | -0.009 | 9.610E-01 | 7.273E-01 |
| TACO1      | -0.009 | 9.502E-01 | 4.781E-01 |
| PARN       | -0.009 | 9.310E-01 | 6.922E-01 |
| NUDCD2     | -0.009 | 9.326E-01 | 8.808E-01 |
| SLFNL1     | -0.009 | 9.779E-01 | 6.378E-01 |
| SNRPC      | -0.009 | 9.491E-01 | 6.789E-01 |
| HDAC8      | -0.009 | 9.325E-01 | 9.667E-01 |
| ZCCHC14    | -0.009 | 9.494E-01 | 6.472E-01 |
| NGDN       | -0.009 | 9.350E-01 | 7.437E-01 |
| ARHGAP27   | -0.009 | 9.669E-01 | 4.267E-01 |
| UBE2D2     | -0.009 | 9.164E-01 | 4.331E-01 |
| FUZ        | -0.009 | 9.675E-01 | 8.539E-01 |
| ZNF3       | -0.009 | 9.509E-01 | 6.189E-01 |
| PPP1R12A   | -0.009 | 9.507E-01 | 8.020E-01 |
| ARHGDIA    | -0.009 | 9.394E-01 | 6.768E-01 |
| PROK2      | -0.009 | 9.885E-01 | 6.053E-01 |
| PIGB       | -0.009 | 9.480E-01 | 7.686E-01 |
| PROB1      | -0.009 | 9.624E-01 | 6.025E-01 |
| ZBTB5      | -0.009 | 9.502E-01 | 5.299E-01 |
| SREBF2     | -0.009 | 9.568E-01 | 9.163E-01 |
| WASHC2A    | -0.009 | 9.321E-01 | 5.066E-01 |
| MIR6089    | -0.009 | NA        | 3.485E-01 |
| MIR4727    | -0.009 | NA        | 4.834E-01 |
| MIR95      | -0.009 | NA        | 7.881E-01 |
| MIR4474    | -0.009 | NA        | 4.668E-01 |
| OR2T3      | -0.009 | NA        | 4.953E-01 |
| AL592490.1 | -0.009 | NA        | 8.835E-01 |
| DAZ1       | -0.009 | NA        | 9.897E-01 |
| MIR652     | -0.009 | NA        | 9.897E-01 |
| DMRTC1     | -0.009 | NA        | 9.897E-01 |
| MIR921     | -0.009 | NA        | 9.897E-01 |
| CFHR2      | -0.009 | NA        | 9.897E-01 |
| ALG5       | -0.009 | 9.448E-01 | 9.897E-01 |
| CCDC22     | -0.009 | 9.430E-01 | 9.897E-01 |
| ATP9A      | -0.009 | 9.639E-01 | 9.897E-01 |
| OSTM1      | -0.009 | 9.598E-01 | 9.897E-01 |
| INPP5K     | -0.009 | 9.467E-01 | 9.897E-01 |
| ZNF83      | -0.009 | 9.709E-01 | 9.897E-01 |
| EBI3       | -0.009 | 9.824E-01 | 9.897E-01 |



|            |        |           |           |
|------------|--------|-----------|-----------|
| ZNF277     | -0.009 | 9.460E-01 | 9.897E-01 |
| ZFAND2B    | -0.009 | 9.533E-01 | 9.897E-01 |
| VPS72      | -0.009 | 9.484E-01 | 9.897E-01 |
| ZNF717     | -0.009 | 9.663E-01 | 9.897E-01 |
| NRN1L      | -0.010 | 9.873E-01 | 9.897E-01 |
| IREB2      | -0.010 | 9.403E-01 | 9.897E-01 |
| DGCR6L     | -0.010 | 9.548E-01 | 9.897E-01 |
| SH2B3      | -0.010 | 9.692E-01 | 9.897E-01 |
| AP3B1      | -0.010 | 9.307E-01 | 9.897E-01 |
| AC079447.1 | -0.010 | 9.604E-01 | 9.897E-01 |
| HOXA6      | -0.010 | 9.792E-01 | 9.897E-01 |
| HLA-DRB1   | -0.010 | 9.828E-01 | 9.897E-01 |
| REEP5      | -0.010 | 9.394E-01 | 9.897E-01 |
| ATE1       | -0.010 | 9.488E-01 | 9.897E-01 |
| H2AFZ      | -0.010 | 9.513E-01 | 9.897E-01 |
| DNAAF5     | -0.010 | 9.403E-01 | 9.897E-01 |
| GAGE2A     | -0.010 | 9.960E-01 | 9.897E-01 |
| FBRS       | -0.010 | 9.380E-01 | 9.897E-01 |
| ASB7       | -0.010 | 9.158E-01 | 9.897E-01 |
| OST4       | -0.010 | 9.370E-01 | 9.897E-01 |
| STAM       | -0.010 | 9.443E-01 | 9.897E-01 |
| NOSIP      | -0.010 | 9.516E-01 | 5.643E-01 |
| BEX1       | -0.010 | 9.865E-01 | 4.561E-01 |
| NUMA1      | -0.010 | 9.378E-01 | 6.639E-01 |
| HLA-DPB1   | -0.010 | 9.807E-01 | 8.725E-01 |
| NPRL2      | -0.010 | 9.547E-01 | 8.126E-01 |
| MCM8       | -0.010 | 9.590E-01 | 5.101E-01 |
| SPACA5B    | -0.010 | NA        | 8.192E-01 |
| RCL1       | -0.010 | 9.554E-01 | 5.947E-01 |
| GAS2L3     | -0.010 | 9.671E-01 | 5.781E-01 |
| RBBP9      | -0.010 | 9.458E-01 | 6.055E-01 |
| CEP57      | -0.010 | 9.302E-01 | 6.241E-01 |
| PRKD1      | -0.010 | 9.756E-01 | 4.407E-01 |
| FOXJ3      | -0.010 | 9.465E-01 | 7.474E-01 |
| GBP2       | -0.010 | 9.668E-01 | 4.977E-01 |
| MICU2      | -0.010 | 9.186E-01 | 5.340E-01 |
| RPL7L1     | -0.010 | 9.318E-01 | 4.153E-01 |
| C1orf189   | -0.010 | 9.792E-01 | 6.746E-01 |
| CENPQ      | -0.010 | 9.475E-01 | 5.797E-01 |
| ERVW-1     | -0.010 | 9.861E-01 | 5.626E-01 |
| SDCBP      | -0.010 | 9.468E-01 | 6.125E-01 |
| LBR        | -0.010 | 9.502E-01 | 8.305E-01 |
| DDIT4L     | -0.010 | 9.847E-01 | 5.179E-01 |
| PPP3CC     | -0.010 | 9.497E-01 | 6.786E-01 |
| SMIM27     | -0.010 | 9.580E-01 | 5.276E-01 |
| ACYP2      | -0.010 | 9.502E-01 | 5.415E-01 |
| TMEM216    | -0.010 | 9.385E-01 | 8.880E-01 |
| TNS3       | -0.010 | 9.671E-01 | 8.291E-01 |
| MRPS7      | -0.010 | 9.257E-01 | 8.032E-01 |
| FAM175B    | -0.010 | 9.096E-01 | 4.078E-01 |

|           |        |           |           |
|-----------|--------|-----------|-----------|
| GFRA3     | -0.011 | 9.847E-01 | 6.712E-01 |
| TRIM56    | -0.011 | 9.381E-01 | 6.943E-01 |
| THNSL2    | -0.011 | 9.796E-01 | 9.762E-01 |
| ARHGEF40  | -0.011 | 9.598E-01 | 4.082E-01 |
| PET117    | -0.011 | 9.460E-01 | 6.111E-01 |
| LMBRD1    | -0.011 | 9.455E-01 | 6.156E-01 |
| TCFL5     | -0.011 | 9.464E-01 | 5.652E-01 |
| DR1       | -0.011 | 9.188E-01 | 3.786E-01 |
| MIR6070   | -0.011 | NA        | 4.390E-01 |
| FEM1B     | -0.011 | 9.376E-01 | 5.167E-01 |
| SLC52A2   | -0.011 | 9.452E-01 | 5.155E-01 |
| DYNLL1    | -0.011 | 9.179E-01 | 7.149E-01 |
| ZNF235    | -0.011 | 9.480E-01 | 5.529E-01 |
| CCDC82    | -0.011 | 9.357E-01 | 5.807E-01 |
| MTMR2     | -0.011 | 9.280E-01 | 5.731E-01 |
| HIST1H2BL | -0.011 | 9.785E-01 | 5.590E-01 |
| OR1C1     | -0.011 | NA        | 7.050E-01 |
| FAM53A    | -0.011 | 9.667E-01 | 5.201E-01 |
| TBC1D3H   | -0.011 | NA        | 6.797E-01 |
| MIR4460   | -0.011 | NA        | 5.439E-01 |
| MIR4484   | -0.011 | NA        | 4.211E-01 |
| FAM120A   | -0.011 | 9.180E-01 | 5.519E-01 |
| HOXA10    | -0.011 | 9.695E-01 | 4.553E-01 |
| DBNDD2    | -0.011 | 9.697E-01 | 6.595E-01 |
| AGRN      | -0.011 | 9.579E-01 | 5.120E-01 |
| RNF135    | -0.011 | 9.334E-01 | 7.663E-01 |
| DLEU1     | -0.011 | 9.583E-01 | 4.924E-01 |
| AMPD2     | -0.011 | 9.379E-01 | 6.890E-01 |
| GPR22     | -0.011 | 9.769E-01 | 9.059E-01 |
| PEX7      | -0.011 | 9.364E-01 | 4.782E-01 |
| MFSD4A    | -0.011 | 9.772E-01 | 5.959E-01 |
| FAM210A   | -0.011 | 9.456E-01 | 6.415E-01 |
| IFNAR2    | -0.011 | 9.483E-01 | 7.418E-01 |
| HIF1AN    | -0.011 | 9.167E-01 | 5.956E-01 |
| CEBPZ     | -0.011 | 9.152E-01 | 5.120E-01 |
| PCDHGA9   | -0.011 | 9.749E-01 | 9.569E-01 |
| KRTAP10-2 | -0.011 | 9.930E-01 | 6.017E-01 |
| TMEM199   | -0.011 | 9.200E-01 | 5.618E-01 |
| KCNA7     | -0.011 | 9.792E-01 | 5.888E-01 |
| CCDC89    | -0.011 | 9.759E-01 | 8.585E-01 |
| SLC22A14  | -0.011 | 9.758E-01 | 9.249E-01 |
| SIKE1     | -0.011 | 9.171E-01 | 4.714E-01 |
| BNIP1     | -0.011 | 9.257E-01 | 6.013E-01 |
| TXNDC12   | -0.011 | 9.027E-01 | 5.335E-01 |
| SMNDC1    | -0.011 | 9.033E-01 | 9.874E-01 |
| CDK20     | -0.011 | 9.639E-01 | 9.851E-01 |
| OFCC1     | -0.012 | 9.856E-01 | 5.597E-01 |
| EXD2      | -0.012 | 9.146E-01 | 5.567E-01 |
| BOD1L2    | -0.012 | NA        | 6.482E-01 |
| PM20D2    | -0.012 | 9.601E-01 | 4.974E-01 |

|            |        |           |           |
|------------|--------|-----------|-----------|
| PIN4       | -0.012 | 9.389E-01 | 5.679E-01 |
| AC020915.1 | -0.012 | 9.263E-01 | 7.941E-01 |
| GET4       | -0.012 | 9.328E-01 | 5.933E-01 |
| TRIB1      | -0.012 | 9.616E-01 | 7.426E-01 |
| EFCAB11    | -0.012 | 9.349E-01 | 5.197E-01 |
| ATRX       | -0.012 | 9.324E-01 | 7.531E-01 |
| MDS2       | -0.012 | 9.759E-01 | 5.461E-01 |
| APAF1      | -0.012 | 9.500E-01 | 5.158E-01 |
| OSTF1      | -0.012 | 9.324E-01 | 4.618E-01 |
| DRD4       | -0.012 | 9.736E-01 | 6.262E-01 |
| EDDM3A     | -0.012 | 9.915E-01 | 7.969E-01 |
| ARHGAP39   | -0.012 | 9.454E-01 | 6.431E-01 |
| COQ10B     | -0.012 | 9.167E-01 | 4.327E-01 |
| ZNF324     | -0.012 | 9.277E-01 | 5.543E-01 |
| RETREG2    | -0.012 | 9.110E-01 | 4.896E-01 |
| ARHGEF18   | -0.012 | 9.463E-01 | 7.354E-01 |
| DNAJC14    | -0.012 | 9.340E-01 | 6.879E-01 |
| FCER1A     | -0.012 | 9.809E-01 | 4.664E-01 |
| GEMIN6     | -0.012 | 9.310E-01 | 6.253E-01 |
| RING1      | -0.012 | 9.182E-01 | 7.599E-01 |
| CLIC1      | -0.012 | 9.325E-01 | 4.033E-01 |
| MIR634     | -0.012 | NA        | 5.335E-01 |
| AC074143.1 | -0.012 | NA        | 6.890E-01 |
| MIR4717    | -0.012 | NA        | 6.080E-01 |
| EVPLL      | -0.012 | 9.841E-01 | 8.967E-01 |
| TMEM167A   | -0.012 | 9.026E-01 | 5.631E-01 |
| HNRNPK     | -0.012 | 8.735E-01 | 5.019E-01 |
| TMEM65     | -0.012 | 9.569E-01 | 4.517E-01 |
| STK16      | -0.012 | 9.153E-01 | 8.519E-01 |
| PRDX3      | -0.012 | 9.186E-01 | 4.563E-01 |
| NUCKS1     | -0.012 | 9.282E-01 | 4.157E-01 |
| ALS2CR12   | -0.012 | 9.634E-01 | 7.319E-01 |
| SF3B4      | -0.012 | 9.202E-01 | 4.886E-01 |
| IVL        | -0.012 | 9.832E-01 | 9.629E-01 |
| EBPL       | -0.012 | 9.579E-01 | 6.672E-01 |
| PHTF2      | -0.012 | 9.173E-01 | 5.654E-01 |
| TMEM218    | -0.012 | 9.238E-01 | 6.622E-01 |
| MAOA       | -0.012 | 9.756E-01 | 4.833E-01 |
| PPARG      | -0.012 | 9.767E-01 | 6.557E-01 |
| MN1        | -0.012 | 9.783E-01 | 7.683E-01 |
| SLC25A20   | -0.012 | 9.506E-01 | 6.442E-01 |
| C11orf57   | -0.012 | 8.966E-01 | 8.771E-01 |
| RIM39-RPP2 | -0.012 | 9.769E-01 | 5.685E-01 |
| USP36      | -0.012 | 9.004E-01 | 7.498E-01 |
| SNIP1      | -0.012 | 8.934E-01 | 6.156E-01 |
| PSMF1      | -0.012 | 9.028E-01 | 6.869E-01 |
| UHRF1BP1   | -0.012 | 9.331E-01 | 5.238E-01 |
| INSL5      | -0.012 | 9.890E-01 | 6.602E-01 |
| FANCI      | -0.012 | 9.435E-01 | 8.055E-01 |
| TSNAXIP1   | -0.012 | 9.650E-01 | 8.658E-01 |

|            |        |           |           |
|------------|--------|-----------|-----------|
| GPATCH2    | -0.012 | 9.146E-01 | 5.957E-01 |
| FAM25G     | -0.013 | 9.924E-01 | 7.317E-01 |
| ZNF181     | -0.013 | 9.372E-01 | 6.764E-01 |
| DNAJB12    | -0.013 | 9.058E-01 | 4.232E-01 |
| LACC1      | -0.013 | 9.482E-01 | 6.031E-01 |
| ABCA13     | -0.013 | 9.837E-01 | 5.890E-01 |
| ZNF680     | -0.013 | 9.481E-01 | 4.538E-01 |
| DGUOK      | -0.013 | 9.137E-01 | 5.682E-01 |
| GALNT14    | -0.013 | 9.769E-01 | 5.912E-01 |
| ZBTB12     | -0.013 | 9.528E-01 | 5.309E-01 |
| SNX32      | -0.013 | 9.632E-01 | 7.489E-01 |
| FAHD1      | -0.013 | 9.274E-01 | 5.582E-01 |
| TMPRSS11E  | -0.013 | 9.857E-01 | 6.738E-01 |
| PEX2       | -0.013 | 9.113E-01 | 5.009E-01 |
| AC008770.3 | -0.013 | 9.688E-01 | 6.313E-01 |
| HID1       | -0.013 | 9.749E-01 | 6.067E-01 |
| EXOSC2     | -0.013 | 9.252E-01 | 9.730E-01 |
| APTX       | -0.013 | 9.276E-01 | 9.731E-01 |
| ELF1       | -0.013 | 9.445E-01 | 8.882E-01 |
| ADI1       | -0.013 | 9.246E-01 | 6.590E-01 |
| ELOC       | -0.013 | 9.117E-01 | 5.290E-01 |
| GALNT2     | -0.013 | 9.435E-01 | 5.390E-01 |
| OR4D1      | -0.013 | NA        | 5.319E-01 |
| MIR3926-1  | -0.013 | NA        | 8.553E-01 |
| NT5C3B     | -0.013 | 9.414E-01 | 5.961E-01 |
| SAMD15     | -0.013 | 9.578E-01 | 7.587E-01 |
| PCCB       | -0.013 | 9.327E-01 | 4.265E-01 |
| APOO       | -0.013 | 9.282E-01 | 4.002E-01 |
| POLR3F     | -0.013 | 9.153E-01 | 4.297E-01 |
| BMS1       | -0.013 | 9.019E-01 | 8.578E-01 |
| CSNK1G1    | -0.013 | 9.105E-01 | 4.578E-01 |
| RIOK2      | -0.013 | 9.002E-01 | 8.898E-01 |
| SCP2       | -0.013 | 9.171E-01 | 5.910E-01 |
| KAT8       | -0.013 | 9.105E-01 | 6.398E-01 |
| TMEM123    | -0.013 | 9.463E-01 | 6.352E-01 |
| MIR1972-1  | -0.013 | 9.829E-01 | 7.408E-01 |
| SPAG5      | -0.013 | 9.518E-01 | 4.861E-01 |
| PTPN9      | -0.013 | 8.945E-01 | 8.179E-01 |
| H3F3C      | -0.013 | 9.521E-01 | 9.153E-01 |
| EGLN2      | -0.013 | 9.375E-01 | 8.002E-01 |
| CREM       | -0.013 | 9.437E-01 | 9.187E-01 |
| AACS       | -0.013 | 9.319E-01 | 6.796E-01 |
| TATDN1     | -0.013 | 9.218E-01 | 3.113E-01 |
| ZNF638     | -0.013 | 8.781E-01 | 9.665E-01 |
| STPG2      | -0.013 | 9.749E-01 | 9.685E-01 |
| COL4A3BP   | -0.013 | 9.208E-01 | 5.945E-01 |
| LYSMD2     | -0.013 | 9.423E-01 | 4.959E-01 |
| C10orf76   | -0.013 | 8.838E-01 | 4.619E-01 |
| KMT2A      | -0.013 | 9.112E-01 | 8.108E-01 |
| PTPMT1     | -0.013 | 9.248E-01 | 9.530E-01 |

|            |        |           |           |
|------------|--------|-----------|-----------|
| HNRNPU     | -0.013 | 8.557E-01 | 6.219E-01 |
| PTGES3     | -0.013 | 8.935E-01 | 5.806E-01 |
| AC010319.2 | -0.014 | NA        | 4.511E-01 |
| MIR1275    | -0.014 | NA        | 4.834E-01 |
| MIR449A    | -0.014 | NA        | 5.319E-01 |
| MIR4749    | -0.014 | NA        | 7.168E-01 |
| MIR502     | -0.014 | NA        | 5.554E-01 |
| MIR552     | -0.014 | NA        | 8.335E-01 |
| MIR5682    | -0.014 | NA        | 4.270E-01 |
| MIR617     | -0.014 | NA        | 8.602E-01 |
| MIRLET7F2  | -0.014 | NA        | 5.667E-01 |
| DEFB106A   | -0.014 | NA        | 5.719E-01 |
| MIR139     | -0.014 | NA        | 5.778E-01 |
| MIR548W    | -0.014 | NA        | 5.597E-01 |
| MIR6862-2  | -0.014 | NA        | 7.477E-01 |
| MIR7702    | -0.014 | NA        | 9.909E-01 |
| OR4F29     | -0.014 | NA        | 9.900E-01 |
| AL132780.3 | -0.014 | NA        | 9.887E-01 |
| BPY2       | -0.014 | NA        | 9.887E-01 |
| DEFB112    | -0.014 | NA        | 9.876E-01 |
| LCE3B      | -0.014 | NA        | 9.865E-01 |
| MIR1-1     | -0.014 | NA        | 9.865E-01 |
| MIR133B    | -0.014 | NA        | 9.854E-01 |
| MIR1471    | -0.014 | NA        | 9.852E-01 |
| MIR299     | -0.014 | NA        | 9.109E-01 |
| MIR3169    | -0.014 | NA        | 8.661E-01 |
| MIR323B    | -0.014 | NA        | 5.044E-01 |
| MIR3687-2  | -0.014 | NA        | 9.406E-01 |
| MIR379     | -0.014 | NA        | 5.915E-01 |
| MIR3910-1  | -0.014 | NA        | 6.153E-01 |
| MIR3935    | -0.014 | NA        | 8.883E-01 |
| MIR4288    | -0.014 | NA        | 4.989E-01 |
| MIR4290    | -0.014 | NA        | 6.442E-01 |
| MIR4318    | -0.014 | NA        | 5.607E-01 |
| MIR4471    | -0.014 | NA        | 5.172E-01 |
| MIR4508    | -0.014 | NA        | 8.157E-01 |
| MIR6130    | -0.014 | NA        | 5.018E-01 |
| MIR6795    | -0.014 | NA        | 9.455E-01 |
| OR4C46     | -0.014 | NA        | 6.402E-01 |
| TP53TG3F   | -0.014 | NA        | 5.942E-01 |
| AC005670.2 | -0.014 | NA        | 5.439E-01 |
| MIR1185-2  | -0.014 | NA        | 7.870E-01 |
| MIR1298    | -0.014 | NA        | 6.447E-01 |
| MIR3141    | -0.014 | NA        | 5.759E-01 |
| MIR3648-2  | -0.014 | NA        | 9.455E-01 |
| MIR4465    | -0.014 | NA        | 5.371E-01 |
| MIR4487    | -0.014 | NA        | 4.535E-01 |
| MIR4527    | -0.014 | NA        | 5.129E-01 |
| MIR489     | -0.014 | NA        | 9.037E-01 |
| MIR493     | -0.014 | NA        | 9.258E-01 |

|            |        |           |           |
|------------|--------|-----------|-----------|
| MIR514A1   | -0.014 | NA        | 7.193E-01 |
| MIR5197    | -0.014 | NA        | 5.561E-01 |
| MIR548AB   | -0.014 | NA        | 5.651E-01 |
| MIR548AI   | -0.014 | NA        | 7.951E-01 |
| MIR6083    | -0.014 | NA        | 5.560E-01 |
| MIR653     | -0.014 | NA        | 6.702E-01 |
| MIR6770-1  | -0.014 | NA        | 8.756E-01 |
| MIR8060    | -0.014 | NA        | 8.050E-01 |
| MIR890     | -0.014 | NA        | 6.528E-01 |
| OR51A4     | -0.014 | NA        | 6.043E-01 |
| POTEB2     | -0.014 | NA        | 9.696E-01 |
| RNASE12    | -0.014 | NA        | 9.717E-01 |
| KCNC1      | -0.014 | 9.780E-01 | 9.744E-01 |
| SLC22A18   | -0.014 | 9.530E-01 | 5.813E-01 |
| DEPDC1     | -0.014 | 9.592E-01 | 6.452E-01 |
| PABPC3     | -0.014 | 9.667E-01 | 5.529E-01 |
| TRAPPC2    | -0.014 | 9.182E-01 | 7.720E-01 |
| IL3RA      | -0.014 | 9.586E-01 | 7.446E-01 |
| SHD        | -0.014 | 9.828E-01 | 5.816E-01 |
| CWF19L2    | -0.014 | 9.296E-01 | 7.172E-01 |
| SNX27      | -0.014 | 9.151E-01 | 6.101E-01 |
| XPO4       | -0.014 | 9.113E-01 | 7.409E-01 |
| TMPRSS7    | -0.014 | 9.719E-01 | 6.318E-01 |
| PLA2G7     | -0.014 | 9.709E-01 | 6.553E-01 |
| DSPP       | -0.014 | 9.829E-01 | 4.865E-01 |
| KLF3       | -0.014 | 9.296E-01 | 5.984E-01 |
| HNRNPLL    | -0.014 | 8.532E-01 | 5.157E-01 |
| MKL1       | -0.014 | 9.036E-01 | 9.485E-01 |
| TMED10     | -0.014 | 8.997E-01 | 7.373E-01 |
| IFIT2      | -0.014 | 9.733E-01 | 4.892E-01 |
| ATMIN      | -0.014 | 8.936E-01 | 9.768E-01 |
| FZD7       | -0.014 | 9.587E-01 | 6.120E-01 |
| PIP5K1A    | -0.014 | 9.272E-01 | 6.618E-01 |
| ZNF12      | -0.014 | 9.096E-01 | 6.661E-01 |
| SPATA25    | -0.014 | 9.502E-01 | 5.399E-01 |
| ZNF623     | -0.014 | 9.135E-01 | 9.084E-01 |
| PPP2R3B    | -0.014 | 9.468E-01 | 5.554E-01 |
| RIPK4      | -0.014 | 9.597E-01 | 4.838E-01 |
| RMI2       | -0.014 | 9.541E-01 | 5.799E-01 |
| USP42      | -0.014 | 9.270E-01 | 6.010E-01 |
| ERCC2      | -0.014 | 9.190E-01 | 9.075E-01 |
| USP20      | -0.014 | 9.041E-01 | 6.573E-01 |
| POLE3      | -0.014 | 9.220E-01 | 6.565E-01 |
| GLIPR2     | -0.014 | 9.676E-01 | 7.691E-01 |
| AC093525.1 | -0.014 | 9.858E-01 | 7.273E-01 |
| TMEM150C   | -0.014 | 9.630E-01 | 6.637E-01 |
| ABO        | -0.014 | 9.768E-01 | 7.911E-01 |
| MIR146B    | -0.014 | NA        | 4.687E-01 |
| SCG5       | -0.014 | 9.714E-01 | 6.576E-01 |
| DTX3       | -0.014 | 9.518E-01 | 8.340E-01 |

|            |        |           |           |
|------------|--------|-----------|-----------|
| ZNF671     | -0.014 | 9.632E-01 | 7.682E-01 |
| CPA4       | -0.014 | 9.835E-01 | 6.283E-01 |
| C17orf62   | -0.014 | 9.133E-01 | 5.947E-01 |
| VAMP1      | -0.014 | 9.441E-01 | 6.833E-01 |
| TOPORS     | -0.014 | 9.128E-01 | 7.994E-01 |
| ARL5A      | -0.014 | 9.151E-01 | 4.850E-01 |
| SLC38A7    | -0.014 | 9.108E-01 | 8.851E-01 |
| FAM46C     | -0.014 | 9.639E-01 | 5.831E-01 |
| PSEN1      | -0.014 | 8.759E-01 | 5.109E-01 |
| GALM       | -0.014 | 9.506E-01 | 5.774E-01 |
| ARMC10     | -0.014 | 8.857E-01 | 6.034E-01 |
| DIAPH1     | -0.014 | 9.210E-01 | 7.021E-01 |
| PCMTD1     | -0.014 | 9.335E-01 | 5.838E-01 |
| ZNF160     | -0.015 | 9.356E-01 | 6.313E-01 |
| NTHL1      | -0.015 | 9.356E-01 | 6.900E-01 |
| DNASE2B    | -0.015 | 9.792E-01 | 8.396E-01 |
| MOB3A      | -0.015 | 9.277E-01 | 9.839E-01 |
| MIR4306    | -0.015 | NA        | 6.395E-01 |
| AC134025.1 | -0.015 | NA        | 6.078E-01 |
| KRTAP9-8   | -0.015 | NA        | 6.169E-01 |
| USP27X     | -0.015 | 9.128E-01 | 9.122E-01 |
| FKBP4      | -0.015 | 9.268E-01 | 5.658E-01 |
| ATR        | -0.015 | 8.997E-01 | 5.845E-01 |
| TUSC2      | -0.015 | 9.203E-01 | 8.298E-01 |
| FIP1L1     | -0.015 | 8.776E-01 | 6.401E-01 |
| DNAJC25    | -0.015 | 9.026E-01 | 8.819E-01 |
| MIR4689    | -0.015 | 9.861E-01 | 5.565E-01 |
| MIR181B2   | -0.015 | NA        | 5.051E-01 |
| DSTYK      | -0.015 | 9.152E-01 | 6.594E-01 |
| RPS6KA3    | -0.015 | 9.238E-01 | 5.547E-01 |
| FBXL20     | -0.015 | 9.132E-01 | 6.044E-01 |
| MIR374B    | -0.015 | 9.822E-01 | 6.269E-01 |
| SACM1L     | -0.015 | 8.996E-01 | 5.315E-01 |
| RANBP2     | -0.015 | 8.880E-01 | 7.835E-01 |
| PRPS1      | -0.015 | 9.326E-01 | 6.596E-01 |
| SELENOW    | -0.015 | 9.292E-01 | 6.066E-01 |
| TMEM219    | -0.015 | 9.262E-01 | 5.317E-01 |
| MAFG       | -0.015 | 9.326E-01 | 7.327E-01 |
| RBM8A      | -0.015 | 8.931E-01 | 4.406E-01 |
| LCMT1      | -0.015 | 9.107E-01 | 7.753E-01 |
| SLC6A13    | -0.015 | 9.780E-01 | 6.326E-01 |
| MFAP3      | -0.015 | 9.450E-01 | 5.210E-01 |
| NCBP1      | -0.015 | 9.026E-01 | 7.286E-01 |
| FBXL14     | -0.015 | 9.326E-01 | 5.649E-01 |
| WDR70      | -0.015 | 9.041E-01 | 9.649E-01 |
| ATP5SL     | -0.015 | 8.815E-01 | 8.046E-01 |
| MINPP1     | -0.015 | 9.095E-01 | 5.574E-01 |
| MTF1       | -0.015 | 9.209E-01 | 5.700E-01 |
| SLC35D2    | -0.015 | 9.133E-01 | 8.205E-01 |
| TTC39B     | -0.015 | 9.447E-01 | 7.325E-01 |

|            |        |           |           |
|------------|--------|-----------|-----------|
| PGAP2      | -0.015 | 9.094E-01 | 4.850E-01 |
| ZNF597     | -0.015 | 9.513E-01 | 8.607E-01 |
| AC008481.3 | -0.015 | NA        | 9.916E-01 |
| ZNF143     | -0.015 | 8.559E-01 | 9.916E-01 |
| C2orf69    | -0.015 | 9.013E-01 | 9.916E-01 |
| DIEXF      | -0.015 | 9.132E-01 | 9.908E-01 |
| PCDH17     | -0.015 | 9.553E-01 | 9.906E-01 |
| ZFAND5     | -0.015 | 9.100E-01 | 9.898E-01 |
| LMNB1      | -0.015 | 9.420E-01 | 7.844E-01 |
| AC092835.1 | -0.015 | 9.540E-01 | 7.204E-01 |
| AUH        | -0.015 | 9.105E-01 | 5.627E-01 |
| NICN1      | -0.015 | 9.237E-01 | 5.554E-01 |
| CEACAM1    | -0.015 | 9.692E-01 | 8.183E-01 |
| ZNF268     | -0.015 | 9.133E-01 | 6.223E-01 |
| AK4        | -0.015 | 9.718E-01 | 7.189E-01 |
| GNB4       | -0.015 | 9.621E-01 | 9.151E-01 |
| OLFML2A    | -0.015 | 9.630E-01 | 5.264E-01 |
| EIF3CL     | -0.015 | 9.494E-01 | 8.709E-01 |
| FOXN3      | -0.015 | 9.238E-01 | 7.497E-01 |
| TRIM11     | -0.015 | 9.137E-01 | 7.158E-01 |
| RAB27B     | -0.015 | 9.650E-01 | 6.885E-01 |
| TEX19      | -0.015 | 9.778E-01 | 6.792E-01 |
| UGT1A6     | -0.015 | 9.787E-01 | 5.319E-01 |
| MIR26A1    | -0.016 | NA        | 6.615E-01 |
| MIR6754    | -0.016 | NA        | 5.489E-01 |
| CCSER1     | -0.016 | 9.714E-01 | 5.531E-01 |
| KANSL1     | -0.016 | 9.037E-01 | 5.610E-01 |
| SCAI       | -0.016 | 9.081E-01 | 8.282E-01 |
| LARP6      | -0.016 | 9.475E-01 | 9.367E-01 |
| ATP13A3    | -0.016 | 9.235E-01 | 5.460E-01 |
| FRAT1      | -0.016 | 9.296E-01 | 6.141E-01 |
| RBM39      | -0.016 | 8.878E-01 | 6.747E-01 |
| XIAP       | -0.016 | 9.131E-01 | 6.337E-01 |
| FAM19A3    | -0.016 | 9.749E-01 | 9.495E-01 |
| ATF4       | -0.016 | 9.013E-01 | 6.628E-01 |
| UBTF       | -0.016 | 8.283E-01 | 6.381E-01 |
| VEZT       | -0.016 | 8.866E-01 | 5.425E-01 |
| DNAL1      | -0.016 | 8.858E-01 | 4.850E-01 |
| RET        | -0.016 | 9.692E-01 | 9.713E-01 |
| DAAM1      | -0.016 | 9.344E-01 | 6.427E-01 |
| COA1       | -0.016 | 8.760E-01 | 5.812E-01 |
| NQO2       | -0.016 | 9.282E-01 | 6.680E-01 |
| ATF1       | -0.016 | 8.953E-01 | 7.068E-01 |
| MIR148A    | -0.016 | 9.749E-01 | 7.630E-01 |
| RAB41      | -0.016 | 9.376E-01 | 6.382E-01 |
| SETDB1     | -0.016 | 9.079E-01 | 5.251E-01 |
| EHMT1      | -0.016 | 8.688E-01 | 9.267E-01 |
| NHLRC3     | -0.016 | 9.113E-01 | 6.313E-01 |
| MIR499A    | -0.016 | 9.718E-01 | 7.073E-01 |
| CTNNA1     | -0.016 | 8.823E-01 | 6.493E-01 |



|           |        |           |           |
|-----------|--------|-----------|-----------|
| FAM71E2   | -0.016 | 9.890E-01 | 5.711E-01 |
| FBLIM1    | -0.016 | 9.324E-01 | 6.005E-01 |
| KCNAB2    | -0.016 | 9.516E-01 | 6.230E-01 |
| MIR4771-1 | -0.016 | NA        | 5.904E-01 |
| KRTAP21-3 | -0.016 | NA        | 6.875E-01 |
| MIR3919   | -0.016 | NA        | 8.091E-01 |
| MIR4311   | -0.016 | NA        | 8.349E-01 |
| MIR500A   | -0.016 | NA        | 8.031E-01 |
| MIR5583-1 | -0.016 | NA        | 7.714E-01 |
| MIR6790   | -0.016 | NA        | 6.113E-01 |
| MIR941-4  | -0.016 | NA        | 6.455E-01 |
| OR8K1     | -0.016 | NA        | 6.182E-01 |
| IFNA4     | -0.016 | NA        | 8.525E-01 |
| MIR3154   | -0.016 | NA        | 6.329E-01 |
| MIR375    | -0.016 | NA        | 7.188E-01 |
| MIR4457   | -0.016 | NA        | 9.021E-01 |
| MIR4488   | -0.016 | NA        | 8.133E-01 |
| MIR4718   | -0.016 | NA        | 7.106E-01 |
| MIR4735   | -0.016 | NA        | 6.592E-01 |
| MIR545    | -0.016 | NA        | 5.809E-01 |
| MIR5571   | -0.016 | NA        | 9.824E-01 |
| MIR577    | -0.016 | NA        | 6.696E-01 |
| MIR802    | -0.016 | NA        | 8.630E-01 |
| OR2T1     | -0.016 | NA        | 8.912E-01 |
| OR5T3     | -0.016 | NA        | 7.124E-01 |
| SPATA31D4 | -0.016 | NA        | 7.004E-01 |
| MIR8054   | -0.016 | NA        | 6.087E-01 |
| FANCL     | -0.016 | 9.128E-01 | 7.609E-01 |
| TBC1D22B  | -0.016 | 8.735E-01 | 9.843E-01 |
| ASXL2     | -0.016 | 9.033E-01 | 9.826E-01 |
| LRIT1     | -0.016 | NA        | 9.807E-01 |
| GOT1      | -0.016 | 9.105E-01 | 9.799E-01 |
| MIR101-1  | -0.016 | NA        | 8.501E-01 |
| RIF1      | -0.016 | 8.887E-01 | 6.426E-01 |
| USP44     | -0.016 | 9.693E-01 | 7.378E-01 |
| RABL3     | -0.017 | 8.858E-01 | 5.532E-01 |
| AVL9      | -0.017 | 8.908E-01 | 6.800E-01 |
| DENND4A   | -0.017 | 8.903E-01 | 5.935E-01 |
| HMGCR     | -0.017 | 9.238E-01 | 6.618E-01 |
| CHCHD4    | -0.017 | 9.152E-01 | 6.442E-01 |
| MRPL30    | -0.017 | 8.932E-01 | 6.737E-01 |
| LMTK2     | -0.017 | 9.206E-01 | 6.809E-01 |
| DBF4B     | -0.017 | 9.167E-01 | 6.709E-01 |
| MRPL10    | -0.017 | 8.559E-01 | 6.267E-01 |
| PLXNB2    | -0.017 | 9.128E-01 | 5.893E-01 |
| FNDC7     | -0.017 | 9.748E-01 | 6.444E-01 |
| FBXW8     | -0.017 | 8.934E-01 | 6.909E-01 |
| RAD51AP2  | -0.017 | 9.785E-01 | 6.226E-01 |
| COX14     | -0.017 | 9.198E-01 | 6.615E-01 |
| VPS16     | -0.017 | 8.760E-01 | 7.891E-01 |

|          |        |           |           |
|----------|--------|-----------|-----------|
| ERCC4    | -0.017 | 9.131E-01 | 7.548E-01 |
| TRAF3IP1 | -0.017 | 8.830E-01 | 6.880E-01 |
| RNPS1    | -0.017 | 8.481E-01 | 8.819E-01 |
| TOMM40L  | -0.017 | 9.290E-01 | 6.290E-01 |
| ACAT2    | -0.017 | 9.257E-01 | 8.498E-01 |
| TMEM184A | -0.017 | 9.624E-01 | 9.201E-01 |
| LRP3     | -0.017 | 9.450E-01 | 7.672E-01 |
| ATM      | -0.017 | 9.096E-01 | 6.161E-01 |
| SHISA5   | -0.017 | 9.210E-01 | 7.048E-01 |
| MRPL46   | -0.017 | 8.873E-01 | 6.384E-01 |
| GSTCD    | -0.017 | 9.188E-01 | 5.651E-01 |
| SCN9A    | -0.017 | 9.730E-01 | 7.089E-01 |
| NME4     | -0.017 | 9.264E-01 | 6.140E-01 |
| CAD      | -0.017 | 9.104E-01 | 5.525E-01 |
| HIGD1A   | -0.017 | 9.128E-01 | 6.100E-01 |
| COPS8    | -0.017 | 8.723E-01 | 7.653E-01 |
| EBAG9    | -0.017 | 8.842E-01 | 8.794E-01 |
| POP7     | -0.017 | 9.047E-01 | 6.554E-01 |
| EVC      | -0.017 | 9.598E-01 | 7.129E-01 |
| C18orf32 | -0.017 | 8.972E-01 | 7.445E-01 |
| TSPO2    | -0.017 | 9.725E-01 | 6.866E-01 |
| NDUFB11  | -0.017 | 9.180E-01 | 8.108E-01 |
| LITAF    | -0.017 | 9.296E-01 | 6.470E-01 |
| PCMT1    | -0.017 | 8.880E-01 | 9.923E-01 |
| BIRC8    | -0.017 | NA        | 9.923E-01 |
| PLD2     | -0.017 | 9.028E-01 | 9.923E-01 |
| RPL21    | -0.017 | 9.153E-01 | 9.923E-01 |
| DNAJB8   | -0.017 | NA        | 9.923E-01 |
| WHAMM    | -0.017 | 8.852E-01 | 9.923E-01 |
| MIR4662B | -0.017 | NA        | 9.923E-01 |
| MIR7853  | -0.017 | NA        | 9.923E-01 |
| FAM71B   | -0.017 | NA        | 9.923E-01 |
| PRAMEF10 | -0.017 | NA        | 9.923E-01 |
| SKA1     | -0.017 | 9.389E-01 | 9.923E-01 |
| MIR3170  | -0.017 | NA        | 9.923E-01 |
| SORBS3   | -0.017 | 9.400E-01 | 9.923E-01 |
| VPS18    | -0.018 | 8.934E-01 | 9.923E-01 |
| FRG2B    | -0.018 | NA        | 9.923E-01 |
| RNF123   | -0.018 | 8.969E-01 | 9.923E-01 |
| SAP18    | -0.018 | 8.695E-01 | 9.923E-01 |
| MIR4673  | -0.018 | NA        | 9.923E-01 |
| APC      | -0.018 | 9.026E-01 | 9.923E-01 |
| CASP7    | -0.018 | 9.158E-01 | 9.923E-01 |
| KLHL5    | -0.018 | 9.458E-01 | 9.923E-01 |
| C1orf56  | -0.018 | 9.185E-01 | 9.923E-01 |
| CCDC127  | -0.018 | 9.095E-01 | 9.923E-01 |
| FGF11    | -0.018 | 9.655E-01 | 9.923E-01 |
| MGAT1    | -0.018 | 9.326E-01 | 8.630E-01 |
| ANKRD6   | -0.018 | 9.345E-01 | 6.562E-01 |
| PPP1R11  | -0.018 | 8.462E-01 | 8.661E-01 |

|            |        |           |           |
|------------|--------|-----------|-----------|
| CBS        | -0.018 | 9.733E-01 | 7.141E-01 |
| HAUS1      | -0.018 | 9.159E-01 | 8.981E-01 |
| REXO4      | -0.018 | 8.868E-01 | 6.053E-01 |
| PKP2       | -0.018 | 9.555E-01 | 8.510E-01 |
| VRK2       | -0.018 | 9.105E-01 | 4.973E-01 |
| GPRIN1     | -0.018 | 9.579E-01 | 7.631E-01 |
| VDAC2      | -0.018 | 8.972E-01 | 8.061E-01 |
| AL139011.2 | -0.018 | 9.577E-01 | 9.275E-01 |
| CDCA5      | -0.018 | 9.412E-01 | 7.920E-01 |
| 44076.000  | -0.018 | 8.694E-01 | 6.233E-01 |
| LCOR       | -0.018 | 9.283E-01 | 5.615E-01 |
| ANKS6      | -0.018 | 9.361E-01 | 6.384E-01 |
| AGBL3      | -0.018 | 9.171E-01 | 8.420E-01 |
| USP54      | -0.018 | 9.238E-01 | 8.741E-01 |
| L3MBTL2    | -0.018 | 8.530E-01 | 8.145E-01 |
| RCE1       | -0.018 | 8.936E-01 | 5.907E-01 |
| ANKRD13B   | -0.018 | 9.475E-01 | 7.200E-01 |
| SLC27A2    | -0.018 | 9.598E-01 | 7.127E-01 |
| CCZ1       | -0.018 | 8.997E-01 | 6.420E-01 |
| MIR1261    | -0.018 | NA        | 6.260E-01 |
| CCDC92     | -0.018 | 9.095E-01 | 7.486E-01 |
| EDARADD    | -0.018 | 9.587E-01 | 7.663E-01 |
| CEBPA      | -0.018 | 9.586E-01 | 6.106E-01 |
| THAP10     | -0.018 | 9.230E-01 | 8.669E-01 |
| YWHAB      | -0.018 | 8.743E-01 | 9.155E-01 |
| ACAD8      | -0.018 | 8.854E-01 | 8.764E-01 |
| PARK7      | -0.018 | 8.669E-01 | 6.839E-01 |
| C8orf74    | -0.018 | 9.785E-01 | 9.745E-01 |
| NDRG3      | -0.018 | 8.693E-01 | 9.777E-01 |
| ATP6V1C2   | -0.018 | 9.518E-01 | 6.578E-01 |
| WDR81      | -0.018 | 8.876E-01 | 7.027E-01 |
| ZNF718     | -0.018 | 9.394E-01 | 6.106E-01 |
| CRNKL1     | -0.018 | 8.628E-01 | 6.824E-01 |
| EIF1       | -0.019 | 8.645E-01 | 6.494E-01 |
| NTMT1      | -0.019 | 9.079E-01 | 5.555E-01 |
| TIPIN      | -0.019 | 9.028E-01 | 8.214E-01 |
| FBXO8      | -0.019 | 9.003E-01 | 8.105E-01 |
| VN1R2      | -0.019 | 9.861E-01 | 5.382E-01 |
| SDCCAG3    | -0.019 | 8.896E-01 | 9.001E-01 |
| SNUPN      | -0.019 | 8.587E-01 | 6.833E-01 |
| DDX23      | -0.019 | 8.092E-01 | 8.015E-01 |
| RBBP6      | -0.019 | 8.586E-01 | 7.888E-01 |
| NFATC2IP   | -0.019 | 8.903E-01 | 7.566E-01 |
| HEATR6     | -0.019 | 8.936E-01 | 6.013E-01 |
| DTD1       | -0.019 | 9.041E-01 | 9.093E-01 |
| GALC       | -0.019 | 9.265E-01 | 8.776E-01 |
| C16orf59   | -0.019 | 9.292E-01 | 6.625E-01 |
| NKPD1      | -0.019 | 9.631E-01 | 7.106E-01 |
| GPR149     | -0.019 | 9.877E-01 | 8.396E-01 |
| TSR1       | -0.019 | 8.828E-01 | 6.973E-01 |

|           |        |           |           |
|-----------|--------|-----------|-----------|
| WDSUB1    | -0.019 | 8.693E-01 | 7.211E-01 |
| RBAK      | -0.019 | 8.759E-01 | 9.002E-01 |
| IL10RB    | -0.019 | 8.936E-01 | 5.551E-01 |
| COPS4     | -0.019 | 8.599E-01 | 7.200E-01 |
| LCT       | -0.019 | 9.680E-01 | 6.692E-01 |
| TRMT1L    | -0.019 | 8.775E-01 | 8.744E-01 |
| HAT1      | -0.019 | 8.852E-01 | 8.149E-01 |
| MIR5590   | -0.019 | NA        | 7.974E-01 |
| MIR181A1  | -0.019 | NA        | 5.924E-01 |
| OR7A10    | -0.019 | NA        | 7.326E-01 |
| NEUROD6   | -0.019 | NA        | 8.805E-01 |
| OR6C1     | -0.019 | NA        | 7.116E-01 |
| OR51V1    | -0.019 | NA        | 5.440E-01 |
| KRTAP12-4 | -0.019 | NA        | 8.771E-01 |
| MIR1254-2 | -0.019 | NA        | 8.509E-01 |
| OR5J2     | -0.019 | NA        | 8.376E-01 |
| CNGA1     | -0.019 | 9.685E-01 | 8.543E-01 |
| ZNF189    | -0.019 | 8.775E-01 | 8.037E-01 |
| SVBP      | -0.019 | 9.080E-01 | 9.598E-01 |
| ZNF175    | -0.019 | 9.513E-01 | 6.872E-01 |
| LIN52     | -0.019 | 8.728E-01 | 9.693E-01 |
| MIR3139   | -0.019 | NA        | 9.705E-01 |
| CLEC14A   | -0.019 | 9.378E-01 | 7.158E-01 |
| EIF2B1    | -0.019 | 8.135E-01 | 5.814E-01 |
| MIR760    | -0.019 | NA        | 9.891E-01 |
| MFSD6     | -0.019 | 9.105E-01 | 9.888E-01 |
| ATP5G1    | -0.019 | 9.002E-01 | 9.858E-01 |
| SLC27A1   | -0.019 | 9.135E-01 | 9.850E-01 |
| KTI12     | -0.019 | 8.635E-01 | 9.849E-01 |
| SPATA45   | -0.019 | 9.600E-01 | 9.842E-01 |
| AKR1E2    | -0.019 | 9.610E-01 | 6.724E-01 |
| DLAT      | -0.019 | 8.769E-01 | 6.420E-01 |
| CRADD     | -0.019 | 8.878E-01 | 5.776E-01 |
| UQCRHL    | -0.019 | 9.095E-01 | 6.983E-01 |
| ZNF250    | -0.019 | 8.786E-01 | 5.831E-01 |
| ZNF852    | -0.020 | 9.033E-01 | 7.769E-01 |
| TIMM50    | -0.020 | 8.858E-01 | 6.539E-01 |
| UTP14A    | -0.020 | 8.569E-01 | 6.315E-01 |
| LYST      | -0.020 | 9.162E-01 | 7.312E-01 |
| ULBP2     | -0.020 | 9.533E-01 | 7.471E-01 |
| ZDHHC12   | -0.020 | 9.101E-01 | 6.292E-01 |
| CD300A    | -0.020 | 9.529E-01 | 8.313E-01 |
| P2RY4     | -0.020 | 9.673E-01 | 7.862E-01 |
| BCL7A     | -0.020 | 9.038E-01 | 7.319E-01 |
| MTG2      | -0.020 | 8.553E-01 | 7.003E-01 |
| BMP15     | -0.020 | NA        | 7.546E-01 |
| CADM2     | -0.020 | 9.769E-01 | 6.818E-01 |
| GLYR1     | -0.020 | 8.504E-01 | 7.287E-01 |
| NUBP2     | -0.020 | 8.635E-01 | 8.382E-01 |
| CARD9     | -0.020 | 9.539E-01 | 9.090E-01 |

|           |        |           |           |
|-----------|--------|-----------|-----------|
| FOXN2     | -0.020 | 9.135E-01 | 6.223E-01 |
| CYB5R4    | -0.020 | 8.797E-01 | 6.514E-01 |
| TP53TG3   | -0.020 | NA        | 5.450E-01 |
| SHANK3    | -0.020 | 9.153E-01 | 9.446E-01 |
| WDR11     | -0.020 | 8.512E-01 | 7.228E-01 |
| RAB3GAP2  | -0.020 | 8.707E-01 | 5.828E-01 |
| GPS1      | -0.020 | 8.586E-01 | 6.537E-01 |
| OMP       | -0.020 | 9.671E-01 | 6.704E-01 |
| RAPGEF2   | -0.020 | 8.980E-01 | 6.111E-01 |
| ZNF282    | -0.020 | 8.406E-01 | 6.643E-01 |
| UBE2B     | -0.020 | 8.325E-01 | 8.133E-01 |
| EEF1AKMT2 | -0.020 | 8.690E-01 | 8.317E-01 |
| DTX1      | -0.020 | 9.586E-01 | 6.803E-01 |
| RAB27A    | -0.020 | 9.140E-01 | 8.995E-01 |
| ZNF544    | -0.020 | 8.824E-01 | 6.997E-01 |
| ANAPC2    | -0.020 | 8.561E-01 | 7.548E-01 |
| MYO1D     | -0.020 | 9.105E-01 | 5.602E-01 |
| EMC4      | -0.020 | 8.217E-01 | 9.545E-01 |
| TCEANC    | -0.020 | 8.765E-01 | 7.108E-01 |
| WASL      | -0.020 | 8.759E-01 | 6.429E-01 |
| PPP2R5C   | -0.020 | 8.306E-01 | 8.094E-01 |
| HNRNPAB   | -0.020 | 8.475E-01 | 6.576E-01 |
| RHOBTB2   | -0.020 | 9.508E-01 | 8.317E-01 |
| ZCCHC11   | -0.020 | 8.873E-01 | 8.709E-01 |
| SERAC1    | -0.020 | 8.711E-01 | 7.144E-01 |
| CHD8      | -0.020 | 8.348E-01 | 8.895E-01 |
| NSD2      | -0.021 | 9.026E-01 | 5.207E-01 |
| ITGB3BP   | -0.021 | 8.791E-01 | 7.759E-01 |
| GID4      | -0.021 | 8.693E-01 | 7.836E-01 |
| CXorf40A  | -0.021 | 8.694E-01 | 9.254E-01 |
| IRF6      | -0.021 | 9.452E-01 | 7.676E-01 |
| TRAF6     | -0.021 | 8.743E-01 | 8.113E-01 |
| RUFY2     | -0.021 | 8.525E-01 | 7.021E-01 |
| EPS15L1   | -0.021 | 8.189E-01 | 6.990E-01 |
| PLCE1     | -0.021 | 9.501E-01 | 6.420E-01 |
| ZNF684    | -0.021 | 9.003E-01 | 7.327E-01 |
| DAGLB     | -0.021 | 8.513E-01 | 6.517E-01 |
| HADH      | -0.021 | 9.105E-01 | 8.570E-01 |
| SLC30A1   | -0.021 | 9.081E-01 | 8.224E-01 |
| C4orf46   | -0.021 | 8.911E-01 | 7.612E-01 |
| SLC12A4   | -0.021 | 9.092E-01 | 9.931E-01 |
| POLM      | -0.021 | 8.896E-01 | 9.931E-01 |
| C19orf35  | -0.021 | 9.513E-01 | 9.931E-01 |
| DHRS4     | -0.021 | 8.933E-01 | 9.931E-01 |
| UBA6      | -0.021 | 9.076E-01 | 9.931E-01 |
| YOD1      | -0.021 | 9.093E-01 | 9.931E-01 |
| SHISA8    | -0.021 | 9.714E-01 | 9.931E-01 |
| TPBG      | -0.021 | 9.292E-01 | 9.931E-01 |
| ELP3      | -0.021 | 8.706E-01 | 9.931E-01 |
| MOSPD2    | -0.021 | 8.945E-01 | 9.931E-01 |

|           |        |           |           |
|-----------|--------|-----------|-----------|
| IRGQ      | -0.021 | 8.712E-01 | 9.931E-01 |
| PRR15     | -0.021 | 9.619E-01 | 9.931E-01 |
| FAM178B   | -0.021 | 9.709E-01 | 9.931E-01 |
| IP6K1     | -0.021 | 8.487E-01 | 9.931E-01 |
| KDM6A     | -0.021 | 9.170E-01 | 9.931E-01 |
| RHOT1     | -0.021 | 8.799E-01 | 9.931E-01 |
| NCK1      | -0.021 | 9.128E-01 | 9.931E-01 |
| SOCS2     | -0.021 | 9.506E-01 | 9.931E-01 |
| DOCK4     | -0.021 | 9.345E-01 | 9.931E-01 |
| HIBADH    | -0.021 | 8.775E-01 | 9.931E-01 |
| BCOR      | -0.021 | 9.070E-01 | 9.931E-01 |
| ZNF470    | -0.021 | 9.406E-01 | 9.931E-01 |
| SCN4B     | -0.021 | 9.494E-01 | 9.931E-01 |
| CNBP      | -0.021 | 7.970E-01 | 9.931E-01 |
| TMEM70    | -0.021 | 8.541E-01 | 9.931E-01 |
| ZFP2      | -0.021 | 9.466E-01 | 9.931E-01 |
| SLC17A2   | -0.021 | NA        | 9.931E-01 |
| TUBGCP2   | -0.021 | 8.346E-01 | 9.931E-01 |
| TRAF7     | -0.021 | 8.496E-01 | 9.931E-01 |
| H1FOO     | -0.021 | 9.846E-01 | 9.931E-01 |
| SDHB      | -0.021 | 8.138E-01 | 9.931E-01 |
| FAM177A1  | -0.022 | 8.586E-01 | 9.931E-01 |
| SLC35F3   | -0.022 | 9.749E-01 | 9.931E-01 |
| NDC1      | -0.022 | 8.758E-01 | 9.931E-01 |
| LUC7L2    | -0.022 | 8.197E-01 | 9.931E-01 |
| MIR4755   | -0.022 | 9.783E-01 | 9.931E-01 |
| ZNF668    | -0.022 | 8.377E-01 | 9.931E-01 |
| ZMIZ2     | -0.022 | 8.693E-01 | 9.931E-01 |
| ENPP3     | -0.022 | 9.621E-01 | 9.931E-01 |
| CENPN     | -0.022 | 9.133E-01 | 9.931E-01 |
| CIDEC     | -0.022 | 9.784E-01 | 9.931E-01 |
| MIR1180   | -0.022 | 9.770E-01 | 9.931E-01 |
| KPTN      | -0.022 | 8.948E-01 | 9.931E-01 |
| DKC1      | -0.022 | 8.692E-01 | 9.931E-01 |
| PHYHIP    | -0.022 | 9.631E-01 | 5.796E-01 |
| RABEP2    | -0.022 | 9.035E-01 | 6.764E-01 |
| PTPRD     | -0.022 | 9.681E-01 | 6.562E-01 |
| MIR6777   | -0.022 | NA        | 9.234E-01 |
| MIR562    | -0.022 | NA        | 7.988E-01 |
| MIR4265   | -0.022 | NA        | 6.004E-01 |
| MIR633    | -0.022 | NA        | 7.516E-01 |
| MIR4736   | -0.022 | NA        | 9.803E-01 |
| RIC8A     | -0.022 | 8.384E-01 | 9.385E-01 |
| MIR4435-1 | -0.022 | NA        | 6.444E-01 |
| NPVF      | -0.022 | NA        | 7.108E-01 |
| LCE4A     | -0.022 | NA        | 6.988E-01 |
| SETX      | -0.022 | 8.542E-01 | 7.760E-01 |
| TRAK1     | -0.022 | 9.334E-01 | 7.125E-01 |
| GNL3      | -0.022 | 9.022E-01 | 7.258E-01 |
| FLT3LG    | -0.022 | 9.188E-01 | 7.663E-01 |

|           |        |           |           |
|-----------|--------|-----------|-----------|
| RBM15B    | -0.022 | 8.284E-01 | 7.515E-01 |
| CABP5     | -0.022 | NA        | 6.762E-01 |
| CMTR2     | -0.022 | 8.810E-01 | 7.683E-01 |
| TRIM3     | -0.022 | 8.762E-01 | 7.475E-01 |
| SCOC      | -0.022 | 8.460E-01 | 7.660E-01 |
| ZNF410    | -0.022 | 8.476E-01 | 9.361E-01 |
| FAM167B   | -0.022 | 9.259E-01 | 6.259E-01 |
| FPR1      | -0.022 | 9.607E-01 | 5.156E-01 |
| EHBP1L1   | -0.022 | 8.853E-01 | 6.498E-01 |
| SARAF     | -0.022 | 8.735E-01 | 8.170E-01 |
| CISD1     | -0.022 | 8.911E-01 | 7.284E-01 |
| TJP2      | -0.022 | 9.003E-01 | 7.398E-01 |
| VOPP1     | -0.022 | 8.983E-01 | 6.437E-01 |
| RC3H1     | -0.022 | 8.311E-01 | 7.083E-01 |
| PRPF8     | -0.022 | 8.465E-01 | 8.166E-01 |
| TAZ       | -0.022 | 8.797E-01 | 7.712E-01 |
| SPC25     | -0.022 | 9.175E-01 | 6.170E-01 |
| CRK       | -0.022 | 8.217E-01 | 7.058E-01 |
| DOCK1     | -0.022 | 8.833E-01 | 7.139E-01 |
| GRTP1     | -0.022 | 9.267E-01 | 6.757E-01 |
| ATAD1     | -0.022 | 8.632E-01 | 6.548E-01 |
| SHC1      | -0.023 | 9.093E-01 | 6.620E-01 |
| FKRP      | -0.023 | 8.277E-01 | 6.738E-01 |
| BNIP2     | -0.023 | 8.123E-01 | 9.458E-01 |
| PCBP4     | -0.023 | 9.175E-01 | 9.843E-01 |
| ZNF79     | -0.023 | 8.570E-01 | 7.753E-01 |
| TIMM21    | -0.023 | 8.512E-01 | 7.214E-01 |
| TARS      | -0.023 | 8.969E-01 | 8.230E-01 |
| HAUS8     | -0.023 | 8.654E-01 | 5.972E-01 |
| TMBIM6    | -0.023 | 8.345E-01 | 9.645E-01 |
| PRG3      | -0.023 | NA        | 7.862E-01 |
| KRTAP10-4 | -0.023 | NA        | 6.860E-01 |
| MIR548E   | -0.023 | NA        | 6.834E-01 |
| TDP1      | -0.023 | 8.357E-01 | 8.470E-01 |
| SPIN2B    | -0.023 | 8.547E-01 | 7.330E-01 |
| CAPZA3    | -0.023 | 9.861E-01 | 6.387E-01 |
| FMO4      | -0.023 | 9.248E-01 | 7.397E-01 |
| C3AR1     | -0.023 | 9.571E-01 | 9.232E-01 |
| GCNT7     | -0.023 | 9.412E-01 | 6.721E-01 |
| ETS1      | -0.023 | 9.128E-01 | 8.860E-01 |
| NFAT5     | -0.023 | 9.314E-01 | 8.864E-01 |
| C6orf120  | -0.023 | 8.472E-01 | 6.437E-01 |
| UBE2W     | -0.023 | 8.235E-01 | 6.533E-01 |
| PSMD4     | -0.023 | 8.656E-01 | 7.010E-01 |
| SRSF10    | -0.023 | 7.805E-01 | 6.315E-01 |
| NAT1      | -0.023 | 9.054E-01 | 9.429E-01 |
| BABAM1    | -0.023 | 8.465E-01 | 7.148E-01 |
| H2AFY     | -0.023 | 8.042E-01 | 7.306E-01 |
| NASP      | -0.023 | 8.674E-01 | 8.848E-01 |
| CISD3     | -0.023 | 9.160E-01 | 6.479E-01 |

|           |        |           |           |
|-----------|--------|-----------|-----------|
| FCF1      | -0.023 | 8.328E-01 | 6.398E-01 |
| UMPS      | -0.023 | 8.455E-01 | 6.699E-01 |
| HCAR1     | -0.023 | 9.563E-01 | 6.457E-01 |
| ALDH3B1   | -0.023 | 9.455E-01 | 8.443E-01 |
| LOXL4     | -0.023 | 9.621E-01 | 7.339E-01 |
| POM121    | -0.023 | 8.632E-01 | 7.068E-01 |
| MMAB      | -0.023 | 8.878E-01 | 8.160E-01 |
| FAM120C   | -0.023 | 8.857E-01 | 6.779E-01 |
| DNTTIP1   | -0.024 | 8.575E-01 | 8.685E-01 |
| CSN1S1    | -0.024 | 9.847E-01 | 6.839E-01 |
| IGFBPL1   | -0.024 | 9.680E-01 | 6.226E-01 |
| PPP6R1    | -0.024 | 8.430E-01 | 8.408E-01 |
| BAG5      | -0.024 | 8.092E-01 | 6.958E-01 |
| SMARCAL1  | -0.024 | 8.055E-01 | 6.445E-01 |
| PDZD11    | -0.024 | 8.407E-01 | 9.391E-01 |
| FAM117A   | -0.024 | 8.948E-01 | 5.785E-01 |
| CHMP1B    | -0.024 | 8.570E-01 | 7.659E-01 |
| SENP3     | -0.024 | 8.449E-01 | 6.352E-01 |
| TMEM63B   | -0.024 | 8.549E-01 | 9.928E-01 |
| CAMLG     | -0.024 | 8.085E-01 | 9.909E-01 |
| IST1      | -0.024 | 8.132E-01 | 9.895E-01 |
| HNRNPA2B1 | -0.024 | 7.421E-01 | 6.587E-01 |
| CYP2F1    | -0.024 | 9.785E-01 | 9.046E-01 |
| SCYL2     | -0.024 | 8.384E-01 | 7.888E-01 |
| STXBP3    | -0.024 | 8.006E-01 | 7.652E-01 |
| DHX30     | -0.024 | 8.165E-01 | 6.785E-01 |
| ACTR10    | -0.024 | 7.982E-01 | 6.731E-01 |
| ZNF583    | -0.024 | 9.133E-01 | 7.214E-01 |
| WDR82     | -0.024 | 8.188E-01 | 8.942E-01 |
| RBM48     | -0.024 | 8.306E-01 | 7.127E-01 |
| MIR6757   | -0.024 | 9.749E-01 | 7.319E-01 |
| GFOD1     | -0.024 | 9.350E-01 | 6.387E-01 |
| FAM35A    | -0.024 | 8.067E-01 | 5.681E-01 |
| TDGF1     | -0.024 | 9.690E-01 | 8.891E-01 |
| CCDC115   | -0.024 | 8.401E-01 | 8.661E-01 |
| DIS3      | -0.024 | 8.513E-01 | 7.467E-01 |
| MBTPS1    | -0.024 | 8.050E-01 | 8.646E-01 |
| C1orf158  | -0.024 | 9.783E-01 | 5.958E-01 |
| ZC3H14    | -0.024 | 8.189E-01 | 6.991E-01 |
| NFYC      | -0.024 | 8.529E-01 | 7.383E-01 |
| PAGE1     | -0.024 | 9.861E-01 | 8.207E-01 |
| SLC16A4   | -0.024 | 9.520E-01 | 7.428E-01 |
| EPM2A     | -0.024 | 8.909E-01 | 7.420E-01 |
| ZNF444    | -0.024 | 8.750E-01 | 7.741E-01 |
| ZFP69     | -0.024 | 8.755E-01 | 8.923E-01 |
| MARVELD3  | -0.024 | 9.158E-01 | 9.648E-01 |
| WDR92     | -0.024 | 8.727E-01 | 7.024E-01 |
| EFCAB7    | -0.024 | 8.512E-01 | 6.437E-01 |
| MAX       | -0.024 | 7.874E-01 | 9.483E-01 |
| CDK5R1    | -0.024 | 9.386E-01 | 6.219E-01 |



|            |        |           |           |
|------------|--------|-----------|-----------|
| CASK       | -0.024 | 8.772E-01 | 6.994E-01 |
| ZNF214     | -0.024 | 9.394E-01 | 6.791E-01 |
| OSM        | -0.024 | 9.507E-01 | 9.268E-01 |
| QRICH1     | -0.024 | 7.691E-01 | 6.247E-01 |
| TMEM9B     | -0.024 | 8.165E-01 | 8.575E-01 |
| ROCK1      | -0.024 | 8.692E-01 | 9.401E-01 |
| N6AMT1     | -0.024 | 8.580E-01 | 6.638E-01 |
| MIR6739    | -0.024 | 9.529E-01 | 6.434E-01 |
| ERMAP      | -0.024 | 8.631E-01 | 8.150E-01 |
| NIT2       | -0.024 | 8.368E-01 | 6.126E-01 |
| PHKB       | -0.024 | 8.397E-01 | 6.387E-01 |
| ZNF655     | -0.025 | 8.873E-01 | 6.155E-01 |
| UQCC3      | -0.025 | 9.001E-01 | 6.765E-01 |
| FCGR3A     | -0.025 | 9.586E-01 | 9.491E-01 |
| RAB2B      | -0.025 | 8.276E-01 | 5.298E-01 |
| MIR4676    | -0.025 | NA        | 6.339E-01 |
| AC114783.1 | -0.025 | NA        | 6.276E-01 |
| OR13C3     | -0.025 | NA        | 7.073E-01 |
| ZSCAN25    | -0.025 | 8.143E-01 | 6.882E-01 |
| LRRC8B     | -0.025 | 8.876E-01 | 7.109E-01 |
| SH3GLB1    | -0.025 | 7.762E-01 | 7.806E-01 |
| MIR3177    | -0.025 | 9.747E-01 | 6.806E-01 |
| ALG1       | -0.025 | 8.192E-01 | 6.229E-01 |
| PDPK1      | -0.025 | 8.497E-01 | 6.291E-01 |
| EFS        | -0.025 | 9.265E-01 | 6.848E-01 |
| EIF3J      | -0.025 | 8.054E-01 | 9.247E-01 |
| CDK2AP1    | -0.025 | 8.425E-01 | 9.625E-01 |
| INHBB      | -0.025 | 9.411E-01 | 7.116E-01 |
| CCNDBP1    | -0.025 | 8.394E-01 | 7.621E-01 |
| P4HTM      | -0.025 | 9.134E-01 | 7.667E-01 |
| ZNF131     | -0.025 | 8.545E-01 | 7.219E-01 |
| RGL2       | -0.025 | 8.697E-01 | 9.135E-01 |
| SKOR1      | -0.025 | 9.282E-01 | 8.772E-01 |
| JKAMP      | -0.025 | 8.198E-01 | 8.996E-01 |
| SET        | -0.025 | 8.346E-01 | 6.894E-01 |
| DDX3X      | -0.025 | 8.169E-01 | 6.672E-01 |
| EHMT2      | -0.025 | 8.210E-01 | 8.211E-01 |
| ADGRG2     | -0.025 | 9.487E-01 | 7.293E-01 |
| DGKZ       | -0.025 | 8.684E-01 | 6.205E-01 |
| GUK1       | -0.025 | 8.590E-01 | 6.908E-01 |
| THEG       | -0.025 | 9.758E-01 | 7.990E-01 |
| ACTG1      | -0.025 | 8.110E-01 | 5.851E-01 |
| SIRT1      | -0.025 | 8.520E-01 | 7.258E-01 |
| PSMG2      | -0.025 | 8.243E-01 | 6.523E-01 |
| USP5       | -0.025 | 8.189E-01 | 6.920E-01 |
| CYTH4      | -0.025 | 9.494E-01 | 8.497E-01 |
| MIR6819    | -0.025 | 9.493E-01 | 8.135E-01 |
| TMEM258    | -0.025 | 8.360E-01 | 8.687E-01 |
| FOXA3      | -0.025 | 9.671E-01 | 9.008E-01 |
| TNFRSF1A   | -0.025 | 8.735E-01 | 8.380E-01 |

|          |        |           |           |
|----------|--------|-----------|-----------|
| BUB3     | -0.025 | 8.165E-01 | 9.646E-01 |
| LNX2     | -0.025 | 8.693E-01 | 7.070E-01 |
| CLSPN    | -0.025 | 9.296E-01 | 6.717E-01 |
| BMI1     | -0.025 | 8.423E-01 | 9.840E-01 |
| NHP2     | -0.025 | 8.439E-01 | 9.860E-01 |
| CTPS1    | -0.025 | 8.989E-01 | 9.868E-01 |
| MIR4470  | -0.025 | NA        | 6.698E-01 |
| UBR2     | -0.025 | 7.883E-01 | 7.251E-01 |
| MTMR11   | -0.025 | 9.169E-01 | 7.830E-01 |
| GNB5     | -0.025 | 8.631E-01 | 6.985E-01 |
| SLC39A10 | -0.025 | 8.918E-01 | 7.104E-01 |
| PRAMEF14 | -0.026 | NA        | 8.243E-01 |
| PAPOLB   | -0.026 | NA        | 6.330E-01 |
| INPPL1   | -0.026 | 8.369E-01 | 6.589E-01 |
| MBD5     | -0.026 | 8.292E-01 | 8.052E-01 |
| CRBN     | -0.026 | 8.249E-01 | 7.217E-01 |
| DDX49    | -0.026 | 8.381E-01 | 8.412E-01 |
| TMEM81   | -0.026 | 8.586E-01 | 7.579E-01 |
| TOP3A    | -0.026 | 8.541E-01 | 6.490E-01 |
| VPS8     | -0.026 | 8.016E-01 | 8.243E-01 |
| KYAT1    | -0.026 | 8.896E-01 | 7.517E-01 |
| KCNJ14   | -0.026 | 9.137E-01 | 6.908E-01 |
| GPANK1   | -0.026 | 8.557E-01 | 6.645E-01 |
| XRN2     | -0.026 | 8.189E-01 | 7.851E-01 |
| FKBP1C   | -0.026 | 8.735E-01 | 7.898E-01 |
| SNX16    | -0.026 | 8.671E-01 | 7.745E-01 |
| LMF1     | -0.026 | 9.138E-01 | 7.396E-01 |
| ARFIP2   | -0.026 | 8.220E-01 | 7.613E-01 |
| CHD4     | -0.026 | 7.321E-01 | 9.106E-01 |
| GTF2E1   | -0.026 | 8.074E-01 | 8.399E-01 |
| MIR6129  | -0.026 | 9.730E-01 | 6.928E-01 |
| DNAJB1   | -0.026 | 8.876E-01 | 6.900E-01 |
| RFK      | -0.026 | 8.775E-01 | 7.448E-01 |
| NRIP2    | -0.026 | 8.880E-01 | 7.537E-01 |
| PPP2R1B  | -0.026 | 8.384E-01 | 9.599E-01 |
| RPS6KA4  | -0.026 | 8.797E-01 | 6.606E-01 |
| CCHCR1   | -0.026 | 8.878E-01 | 8.266E-01 |
| PPIE     | -0.026 | 8.656E-01 | 7.931E-01 |
| PJA2     | -0.026 | 8.579E-01 | 8.542E-01 |
| NDUFS6   | -0.026 | 8.922E-01 | 7.060E-01 |
| UNC119   | -0.026 | 8.512E-01 | 9.942E-01 |
| LRP6     | -0.026 | 8.570E-01 | 9.934E-01 |
| SP3      | -0.026 | 8.192E-01 | 9.929E-01 |
| KIF1A    | -0.026 | 9.743E-01 | 6.765E-01 |
| MIR608   | -0.026 | NA        | 9.923E-01 |
| DNPB1    | -0.026 | 8.797E-01 | 9.923E-01 |
| FBXW11   | -0.026 | 7.906E-01 | 9.922E-01 |
| OIP5     | -0.026 | 9.053E-01 | 9.921E-01 |
| ASTN1    | -0.026 | 9.672E-01 | 9.916E-01 |
| ZNF764   | -0.026 | 8.259E-01 | 9.251E-01 |

|            |        |           |           |
|------------|--------|-----------|-----------|
| TTC37      | -0.026 | 8.384E-01 | 7.959E-01 |
| KPNA1      | -0.026 | 7.770E-01 | 9.156E-01 |
| DEFB128    | -0.026 | NA        | 7.317E-01 |
| MIR1237    | -0.026 | NA        | 7.806E-01 |
| MIR3938    | -0.026 | NA        | 9.459E-01 |
| MIR4443    | -0.026 | NA        | 9.488E-01 |
| MIR509-3   | -0.026 | NA        | 8.147E-01 |
| MIR548H5   | -0.026 | NA        | 9.132E-01 |
| OR4C3      | -0.026 | NA        | 7.332E-01 |
| OR5B3      | -0.026 | NA        | 6.752E-01 |
| OR8J3      | -0.026 | NA        | 9.479E-01 |
| MIR1231    | -0.026 | NA        | 6.455E-01 |
| MIR3668    | -0.026 | NA        | 7.434E-01 |
| MIR3923    | -0.026 | NA        | 9.398E-01 |
| MIR4752    | -0.026 | NA        | 7.138E-01 |
| MIR7159    | -0.026 | NA        | 6.346E-01 |
| MIR8080    | -0.026 | NA        | 9.621E-01 |
| OR6X1      | -0.026 | NA        | 6.956E-01 |
| TRIM49D1   | -0.026 | NA        | 6.700E-01 |
| ELOA3B     | -0.026 | NA        | 9.740E-01 |
| FAM231C    | -0.026 | NA        | 8.798E-01 |
| KRTAP15-1  | -0.026 | NA        | 7.058E-01 |
| MIR2053    | -0.026 | NA        | 6.107E-01 |
| MIR4300    | -0.026 | NA        | 8.863E-01 |
| MIR4418    | -0.026 | NA        | 8.679E-01 |
| MIR4643    | -0.026 | NA        | 8.014E-01 |
| MIR500B    | -0.026 | NA        | 7.477E-01 |
| MIR5681A   | -0.026 | NA        | 8.565E-01 |
| MIR8074    | -0.026 | NA        | 8.890E-01 |
| MIR885     | -0.026 | NA        | 8.135E-01 |
| MIR99A     | -0.026 | NA        | 7.519E-01 |
| OPN1MW     | -0.026 | NA        | 8.231E-01 |
| OR10G6     | -0.026 | NA        | 6.944E-01 |
| OR13C8     | -0.026 | NA        | 9.309E-01 |
| OR14C36    | -0.026 | NA        | 9.127E-01 |
| OR5T1      | -0.026 | NA        | 7.362E-01 |
| AC073610.2 | -0.026 | NA        | 7.801E-01 |
| AC245748.1 | -0.026 | NA        | 7.353E-01 |
| MIR2392    | -0.026 | NA        | 8.458E-01 |
| MIR3179-2  | -0.026 | NA        | 9.322E-01 |
| MIR450A2   | -0.026 | NA        | 8.053E-01 |
| MIR5100    | -0.026 | NA        | 8.022E-01 |
| MIR518B    | -0.026 | NA        | 7.778E-01 |
| MIR6068    | -0.026 | NA        | 8.905E-01 |
| OR5D14     | -0.026 | NA        | 7.714E-01 |
| USP17L10   | -0.026 | NA        | 8.048E-01 |
| IQCG       | -0.026 | 8.853E-01 | 7.744E-01 |
| ST20       | -0.026 | 9.167E-01 | 8.033E-01 |
| MDFI       | -0.026 | 9.347E-01 | 8.088E-01 |
| INTS7      | -0.026 | 8.233E-01 | 6.992E-01 |

|            |        |           |           |
|------------|--------|-----------|-----------|
| PTDSS2     | -0.026 | 8.693E-01 | 7.894E-01 |
| RBM15      | -0.026 | 8.181E-01 | 8.877E-01 |
| PTDSS1     | -0.026 | 8.512E-01 | 6.438E-01 |
| RBM3       | -0.026 | 8.528E-01 | 7.016E-01 |
| LINC00959  | -0.026 | 9.116E-01 | 7.411E-01 |
| ARHGAP11B  | -0.026 | 8.880E-01 | 8.758E-01 |
| AC020922.1 | -0.026 | 9.683E-01 | 7.333E-01 |
| ST6GALNAC  | -0.026 | 8.972E-01 | 7.332E-01 |
| CFAP157    | -0.026 | 8.922E-01 | 7.503E-01 |
| MED26      | -0.026 | 7.356E-01 | 7.938E-01 |
| DPEP2      | -0.026 | 9.508E-01 | 6.702E-01 |
| KIAA1109   | -0.026 | 8.589E-01 | 7.361E-01 |
| ERFE       | -0.026 | 9.426E-01 | 7.654E-01 |
| LRRC37A3   | -0.026 | 9.213E-01 | 8.898E-01 |
| HMG4       | -0.026 | 8.269E-01 | 6.926E-01 |
| FAAH2      | -0.026 | 9.106E-01 | 6.640E-01 |
| ZBTB33     | -0.027 | 8.184E-01 | 7.441E-01 |
| LANCL1     | -0.027 | 8.570E-01 | 7.455E-01 |
| MIR3116-1  | -0.027 | NA        | 6.494E-01 |
| RXRB       | -0.027 | 7.637E-01 | 8.093E-01 |
| MPHOSPH9   | -0.027 | 8.815E-01 | 7.091E-01 |
| JMY        | -0.027 | 8.513E-01 | 7.561E-01 |
| TNNI3K     | -0.027 | 9.563E-01 | 8.173E-01 |
| DHX40      | -0.027 | 8.405E-01 | 9.048E-01 |
| LARGE1     | -0.027 | 9.213E-01 | 7.315E-01 |
| IGSF3      | -0.027 | 9.128E-01 | 6.668E-01 |
| SLC25A13   | -0.027 | 8.309E-01 | 6.804E-01 |
| ATF2       | -0.027 | 7.972E-01 | 7.847E-01 |
| RPUSD1     | -0.027 | 8.349E-01 | 9.231E-01 |
| PPP1R7     | -0.027 | 8.245E-01 | 7.138E-01 |
| DFFA       | -0.027 | 7.791E-01 | 7.355E-01 |
| DCAKD      | -0.027 | 8.635E-01 | 6.988E-01 |
| RPE65      | -0.027 | 9.766E-01 | 8.198E-01 |
| BAG6       | -0.027 | 7.528E-01 | 9.882E-01 |
| SPTY2D1    | -0.027 | 8.232E-01 | 7.517E-01 |
| MPLKIP     | -0.027 | 8.053E-01 | 8.162E-01 |
| IL12B      | -0.027 | 9.600E-01 | 8.956E-01 |
| RGPD8      | -0.027 | 9.249E-01 | 7.225E-01 |
| PRKCZ      | -0.027 | 8.671E-01 | 6.971E-01 |
| GRINA      | -0.027 | 8.416E-01 | 9.452E-01 |
| RAP2B      | -0.027 | 8.815E-01 | 9.819E-01 |
| GK5        | -0.027 | 8.516E-01 | 7.079E-01 |
| FECH       | -0.027 | 8.692E-01 | 7.966E-01 |
| SMAD7      | -0.027 | 8.989E-01 | 9.235E-01 |
| IRS1       | -0.027 | 9.212E-01 | 8.941E-01 |
| GSKIP      | -0.027 | 8.093E-01 | 8.079E-01 |
| PGAM1      | -0.027 | 8.773E-01 | 8.948E-01 |
| C3orf33    | -0.027 | 8.688E-01 | 8.214E-01 |
| OPA3       | -0.027 | 8.110E-01 | 7.101E-01 |
| ERCC6L2    | -0.027 | 8.245E-01 | 7.627E-01 |

|            |        |           |           |
|------------|--------|-----------|-----------|
| ZNF345     | -0.027 | 8.930E-01 | 7.957E-01 |
| BLOC1S6    | -0.027 | 7.793E-01 | 7.495E-01 |
| KIAA1586   | -0.027 | 8.511E-01 | 8.065E-01 |
| LRRC41     | -0.027 | 7.758E-01 | 7.666E-01 |
| PTPN1      | -0.027 | 8.181E-01 | 7.459E-01 |
| AKIRIN1    | -0.027 | 8.361E-01 | 9.110E-01 |
| AP001781.3 | -0.027 | NA        | 9.087E-01 |
| MIR6827    | -0.027 | NA        | 7.226E-01 |
| MIR5189    | -0.027 | NA        | 8.162E-01 |
| MIR584     | -0.027 | NA        | 7.892E-01 |
| PRAMEF33   | -0.027 | NA        | 8.090E-01 |
| WFDC9      | -0.027 | NA        | 9.621E-01 |
| PPRC1      | -0.027 | 7.782E-01 | 6.342E-01 |
| TSPAN14    | -0.027 | 8.596E-01 | 8.625E-01 |
| MIR2467    | -0.027 | NA        | 9.772E-01 |
| MIR3117    | -0.027 | NA        | 7.385E-01 |
| BBX        | -0.028 | 8.446E-01 | 8.906E-01 |
| MIR3183    | -0.028 | NA        | 8.030E-01 |
| FAM109B    | -0.028 | 9.083E-01 | 7.476E-01 |
| CNGB3      | -0.028 | 9.334E-01 | 9.257E-01 |
| LINC00672  | -0.028 | 9.246E-01 | 9.950E-01 |
| MIR4489    | -0.028 | 9.319E-01 | 9.950E-01 |
| ZNF66      | -0.028 | 9.455E-01 | 9.950E-01 |
| MYNN       | -0.028 | 7.519E-01 | 9.950E-01 |
| FAM210B    | -0.028 | 8.574E-01 | 9.946E-01 |
| AL136295.3 | -0.028 | 9.468E-01 | 9.946E-01 |
| MAPK13     | -0.028 | 8.693E-01 | 9.946E-01 |
| ZBTB17     | -0.028 | 7.857E-01 | 9.945E-01 |
| ROBO4      | -0.028 | 9.043E-01 | 9.944E-01 |
| SOX4       | -0.028 | 9.133E-01 | 7.607E-01 |
| ADCY1      | -0.028 | 9.445E-01 | 7.476E-01 |
| NDUFA6     | -0.028 | 8.343E-01 | 9.248E-01 |
| NBPF20     | -0.028 | 8.622E-01 | 7.165E-01 |
| COG8       | -0.028 | 7.599E-01 | 7.788E-01 |
| ADGRL3     | -0.028 | 9.567E-01 | 7.439E-01 |
| ZNF138     | -0.028 | 8.630E-01 | 7.328E-01 |
| THOC2      | -0.028 | 8.504E-01 | 7.567E-01 |
| AC025594.3 | -0.028 | 9.257E-01 | 9.685E-01 |
| CBL        | -0.028 | 8.570E-01 | 9.156E-01 |
| REV1       | -0.028 | 8.296E-01 | 8.459E-01 |
| FA2H       | -0.028 | 9.457E-01 | 8.409E-01 |
| CRB1       | -0.028 | 9.601E-01 | 7.971E-01 |
| ALG9       | -0.028 | 7.910E-01 | 7.786E-01 |
| POLI       | -0.028 | 8.828E-01 | 7.726E-01 |
| SHBG       | -0.028 | 9.001E-01 | 7.138E-01 |
| C17orf107  | -0.028 | 9.070E-01 | 6.289E-01 |
| CNNM2      | -0.028 | 8.423E-01 | 7.141E-01 |
| PAN-P2RY1  | -0.028 | 9.567E-01 | 7.713E-01 |
| DNAJC7     | -0.028 | 7.478E-01 | 9.652E-01 |
| ERG        | -0.028 | 9.113E-01 | 7.897E-01 |

|               |        |           |           |
|---------------|--------|-----------|-----------|
| GLIPR1L1      | -0.028 | 9.162E-01 | 7.943E-01 |
| SPATA2        | -0.028 | 7.602E-01 | 8.025E-01 |
| C14orf1       | -0.028 | 8.217E-01 | 7.242E-01 |
| TNIP1         | -0.028 | 8.421E-01 | 7.209E-01 |
| FBXO31        | -0.028 | 7.970E-01 | 8.662E-01 |
| ZMAT5         | -0.028 | 8.530E-01 | 7.657E-01 |
| MCAT          | -0.028 | 8.269E-01 | 8.916E-01 |
| GSG1L2        | -0.028 | NA        | 7.325E-01 |
| MIR4667       | -0.028 | NA        | 9.494E-01 |
| WDR13         | -0.028 | 8.425E-01 | 7.282E-01 |
| TRPC3         | -0.028 | 9.454E-01 | 7.615E-01 |
| C17orf98      | -0.028 | 9.631E-01 | 7.411E-01 |
| MYLPF         | -0.028 | 9.399E-01 | 8.342E-01 |
| ZXDC          | -0.028 | 7.970E-01 | 9.048E-01 |
| ADD3          | -0.028 | 8.878E-01 | 9.052E-01 |
| RFC4          | -0.028 | 8.781E-01 | 8.064E-01 |
| EEF2KMT       | -0.028 | 8.075E-01 | 9.872E-01 |
| SLC25A26      | -0.028 | 8.181E-01 | 7.874E-01 |
| AP3M2         | -0.028 | 8.580E-01 | 9.078E-01 |
| NUDT6         | -0.028 | 8.622E-01 | 8.819E-01 |
| ST13          | -0.028 | 7.848E-01 | 7.784E-01 |
| SGK494        | -0.028 | 9.132E-01 | 7.027E-01 |
| SEMA5B        | -0.028 | 9.444E-01 | 8.357E-01 |
| ABCC6         | -0.028 | 9.272E-01 | 8.236E-01 |
| UVRAG         | -0.028 | 8.164E-01 | 8.594E-01 |
| URGCP         | -0.029 | 7.644E-01 | 8.446E-01 |
| NARS          | -0.029 | 8.057E-01 | 7.335E-01 |
| MSH5          | -0.029 | 9.015E-01 | 8.686E-01 |
| TMEM179       | -0.029 | 9.692E-01 | 9.017E-01 |
| BRICD5        | -0.029 | 9.095E-01 | 7.837E-01 |
| ERO1B         | -0.029 | 8.861E-01 | 9.030E-01 |
| RBM23         | -0.029 | 7.192E-01 | 8.087E-01 |
| SAMD12        | -0.029 | 9.319E-01 | 8.985E-01 |
| PSMD14        | -0.029 | 7.937E-01 | 7.643E-01 |
| CMTM5         | -0.029 | 9.552E-01 | 8.209E-01 |
| AGTPBP1       | -0.029 | 8.587E-01 | 9.370E-01 |
| ZNF677        | -0.029 | 9.394E-01 | 6.903E-01 |
| TARS2         | -0.029 | 8.259E-01 | 8.564E-01 |
| SV2A          | -0.029 | 9.380E-01 | 8.525E-01 |
| MIR1202       | -0.029 | NA        | 9.205E-01 |
| MIR1263       | -0.029 | NA        | 8.060E-01 |
| MIR16-1       | -0.029 | NA        | 8.259E-01 |
| MIR3646       | -0.029 | NA        | 8.780E-01 |
| MIR466        | -0.029 | NA        | 8.206E-01 |
| MIR548U       | -0.029 | NA        | 7.935E-01 |
| OR2T29        | -0.029 | NA        | 9.898E-01 |
| OR5AS1        | -0.029 | NA        | 7.337E-01 |
| AC008537.1    | -0.029 | NA        | 7.829E-01 |
| DEFB129       | -0.029 | NA        | 9.709E-01 |
| isa-mir-4773- | -0.029 | NA        | 7.781E-01 |

|            |        |           |           |
|------------|--------|-----------|-----------|
| MIR134     | -0.029 | NA        | 8.671E-01 |
| MIR217     | -0.029 | NA        | 9.752E-01 |
| MIR4280    | -0.029 | NA        | 8.651E-01 |
| MIR4439    | -0.029 | NA        | 9.929E-01 |
| MIR4445    | -0.029 | NA        | 9.924E-01 |
| MIR4462    | -0.029 | NA        | 9.919E-01 |
| MIR548F3   | -0.029 | NA        | 9.894E-01 |
| NPS        | -0.029 | NA        | 7.609E-01 |
| OR13F1     | -0.029 | NA        | 9.753E-01 |
| OR2M5      | -0.029 | NA        | 8.199E-01 |
| OR4S2      | -0.029 | NA        | 7.943E-01 |
| OR52A5     | -0.029 | NA        | 9.833E-01 |
| TAAR2      | -0.029 | NA        | 7.675E-01 |
| TSC1       | -0.029 | 8.206E-01 | 8.465E-01 |
| IGFLR1     | -0.029 | 9.113E-01 | 8.251E-01 |
| PPARD      | -0.029 | 8.444E-01 | 9.353E-01 |
| CCDC112    | -0.029 | 8.760E-01 | 7.835E-01 |
| CPD        | -0.029 | 8.582E-01 | 9.077E-01 |
| AP1S1      | -0.029 | 8.254E-01 | 7.980E-01 |
| PTGDR      | -0.029 | 9.464E-01 | 7.594E-01 |
| CDC42BPG   | -0.029 | 8.873E-01 | 7.376E-01 |
| ZBTB25     | -0.029 | 7.968E-01 | 8.130E-01 |
| MRM2       | -0.029 | 7.583E-01 | 8.083E-01 |
| TBK1       | -0.029 | 7.994E-01 | 8.406E-01 |
| SH3RF1     | -0.029 | 8.561E-01 | 9.362E-01 |
| ZBTB11     | -0.030 | 7.671E-01 | 8.266E-01 |
| TMEM243    | -0.030 | 8.164E-01 | 7.653E-01 |
| MORN1      | -0.030 | 8.539E-01 | 8.309E-01 |
| CRYZL1     | -0.030 | 8.007E-01 | 8.068E-01 |
| CCNA2      | -0.030 | 8.880E-01 | 8.753E-01 |
| OLIG1      | -0.030 | 9.652E-01 | 9.139E-01 |
| TEAD2      | -0.030 | 9.314E-01 | 8.395E-01 |
| PLEKHB2    | -0.030 | 8.092E-01 | 8.453E-01 |
| HIST1H2AB  | -0.030 | 9.475E-01 | 6.935E-01 |
| RP2        | -0.030 | 8.448E-01 | 7.572E-01 |
| FMC1       | -0.030 | 8.815E-01 | 8.142E-01 |
| ABCA2      | -0.030 | 9.002E-01 | 7.444E-01 |
| FAM86C1    | -0.030 | 8.291E-01 | 8.282E-01 |
| BICRA      | -0.030 | 8.054E-01 | 9.496E-01 |
| EXOSC3     | -0.030 | 8.466E-01 | 7.781E-01 |
| ZCCHC7     | -0.030 | 8.192E-01 | 9.393E-01 |
| TMEM60     | -0.030 | 7.837E-01 | 8.135E-01 |
| VPS37A     | -0.030 | 8.080E-01 | 7.086E-01 |
| PPCDC      | -0.030 | 8.352E-01 | 8.227E-01 |
| ZNF184     | -0.030 | 8.410E-01 | 8.296E-01 |
| TMEM110    | -0.030 | 8.369E-01 | 7.773E-01 |
| MRPL57     | -0.030 | 8.192E-01 | 8.195E-01 |
| AC003002.1 | -0.030 | 8.292E-01 | 8.359E-01 |
| AUP1       | -0.030 | 7.864E-01 | 7.725E-01 |
| NDUFB9     | -0.030 | 8.404E-01 | 7.736E-01 |

|               |        |           |           |
|---------------|--------|-----------|-----------|
| WDR61         | -0.030 | 7.586E-01 | 7.625E-01 |
| ADCY6         | -0.030 | 8.725E-01 | 9.281E-01 |
| SPSB3         | -0.030 | 8.184E-01 | 7.698E-01 |
| TMEM37        | -0.030 | 9.315E-01 | 9.819E-01 |
| MIR1229       | -0.030 | NA        | 8.085E-01 |
| MIR1272       | -0.030 | NA        | 9.848E-01 |
| MIR34B        | -0.030 | NA        | 7.955E-01 |
| OR6F1         | -0.030 | NA        | 7.399E-01 |
| TRPM4         | -0.030 | 8.852E-01 | 8.130E-01 |
| POLR1A        | -0.030 | 7.959E-01 | 9.957E-01 |
| CBFA2T2       | -0.030 | 8.517E-01 | 9.957E-01 |
| TAS2R14       | -0.030 | 8.579E-01 | 9.957E-01 |
| RP1L1         | -0.030 | 9.516E-01 | 9.957E-01 |
| MS4A6A        | -0.030 | 9.380E-01 | 9.957E-01 |
| KBTBD3        | -0.030 | 8.345E-01 | 9.957E-01 |
| MIR4692       | -0.030 | NA        | 9.957E-01 |
| CDKN2AIP      | -0.030 | 7.779E-01 | 9.957E-01 |
| PEX16         | -0.030 | 8.278E-01 | 9.957E-01 |
| SMAP2         | -0.030 | 8.570E-01 | 9.957E-01 |
| EIF4EBP3      | -0.030 | 9.128E-01 | 9.957E-01 |
| GOLGA8S       | -0.030 | 9.579E-01 | 9.957E-01 |
| PLK4          | -0.030 | 8.614E-01 | 9.957E-01 |
| ETFDH         | -0.030 | 8.123E-01 | 9.957E-01 |
| SRL           | -0.030 | 9.326E-01 | 9.957E-01 |
| PNPT1         | -0.030 | 8.026E-01 | 9.957E-01 |
| RCCD1         | -0.030 | 8.197E-01 | 9.957E-01 |
| POMP          | -0.030 | 7.972E-01 | 9.957E-01 |
| BRIP1         | -0.030 | 8.896E-01 | 9.957E-01 |
| RSPH4A        | -0.030 | 9.081E-01 | 9.957E-01 |
| MIR331        | -0.030 | 9.235E-01 | 9.957E-01 |
| C20orf202     | -0.031 | 9.105E-01 | 9.957E-01 |
| SPATA33       | -0.031 | 8.448E-01 | 9.957E-01 |
| CLCN6         | -0.031 | 7.847E-01 | 9.957E-01 |
| LTA4H         | -0.031 | 8.055E-01 | 8.912E-01 |
| BAZ2A         | -0.031 | 7.907E-01 | 8.519E-01 |
| NDUFB3        | -0.031 | 7.714E-01 | 9.710E-01 |
| CHM           | -0.031 | 8.217E-01 | 7.559E-01 |
| SLC38A1       | -0.031 | 8.549E-01 | 9.335E-01 |
| TK2           | -0.031 | 8.109E-01 | 8.108E-01 |
| DSG4          | -0.031 | 9.689E-01 | 7.312E-01 |
| VPS52         | -0.031 | 7.389E-01 | 8.027E-01 |
| PLCG1         | -0.031 | 8.162E-01 | 8.621E-01 |
| PDCD4         | -0.031 | 8.860E-01 | 9.401E-01 |
| ENDOG         | -0.031 | 8.545E-01 | 7.811E-01 |
| HEXIM2        | -0.031 | 8.333E-01 | 8.443E-01 |
| POLR3H        | -0.031 | 7.781E-01 | 7.445E-01 |
| ZNF234        | -0.031 | 8.184E-01 | 8.558E-01 |
| isa-mir-3130- | -0.031 | NA        | 9.273E-01 |
| FAM104A       | -0.031 | 7.093E-01 | 7.625E-01 |
| TRAPPC11      | -0.031 | 7.509E-01 | 7.639E-01 |



|            |        |           |           |
|------------|--------|-----------|-----------|
| ZBTB34     | -0.031 | 8.162E-01 | 6.603E-01 |
| MAPKAPK3   | -0.031 | 8.298E-01 | 7.915E-01 |
| MIR7849    | -0.031 | NA        | 9.402E-01 |
| HSD17B10   | -0.031 | 8.130E-01 | 8.140E-01 |
| DZIP3      | -0.031 | 8.374E-01 | 7.666E-01 |
| RAP1GDS1   | -0.031 | 7.994E-01 | 8.467E-01 |
| NPLOC4     | -0.031 | 7.535E-01 | 8.349E-01 |
| FAM133A    | -0.031 | 9.733E-01 | 8.819E-01 |
| HLA-DMA    | -0.031 | 9.198E-01 | 8.034E-01 |
| TOMM20     | -0.031 | 7.643E-01 | 7.962E-01 |
| CBFB       | -0.031 | 7.586E-01 | 9.322E-01 |
| GRWD1      | -0.031 | 7.558E-01 | 9.860E-01 |
| SUZ12      | -0.031 | 8.291E-01 | 9.878E-01 |
| PRPF4B     | -0.031 | 7.435E-01 | 9.500E-01 |
| PLOD3      | -0.031 | 8.402E-01 | 9.470E-01 |
| EPM2AIP1   | -0.031 | 8.450E-01 | 9.196E-01 |
| NUDT17     | -0.031 | 8.596E-01 | 8.167E-01 |
| SGPL1      | -0.031 | 8.786E-01 | 8.360E-01 |
| F13A1      | -0.031 | 9.426E-01 | 8.864E-01 |
| DNAJA2     | -0.031 | 7.397E-01 | 9.153E-01 |
| FOXD4L6    | -0.031 | 9.630E-01 | 9.135E-01 |
| C9orf142   | -0.031 | 8.615E-01 | 9.336E-01 |
| TECR       | -0.032 | 8.053E-01 | 8.155E-01 |
| PIP5KL1    | -0.032 | 9.146E-01 | 9.279E-01 |
| SEC24B     | -0.032 | 7.601E-01 | 8.354E-01 |
| ALG6       | -0.032 | 7.653E-01 | 8.086E-01 |
| MVP        | -0.032 | 8.625E-01 | 8.958E-01 |
| PCDHB14    | -0.032 | 8.978E-01 | 8.699E-01 |
| AC009086.2 | -0.032 | NA        | 8.076E-01 |
| OR6N1      | -0.032 | NA        | 8.982E-01 |
| OR4A47     | -0.032 | NA        | 8.144E-01 |
| KRTAP22-1  | -0.032 | NA        | 7.915E-01 |
| KRTAP23-1  | -0.032 | NA        | 7.087E-01 |
| OR5AC2     | -0.032 | NA        | 9.661E-01 |
| NHSL2      | -0.032 | 9.369E-01 | 8.907E-01 |
| SRP9       | -0.032 | 7.093E-01 | 8.056E-01 |
| GRAMD3     | -0.032 | 8.693E-01 | 8.748E-01 |
| TLR3       | -0.032 | 9.158E-01 | 8.154E-01 |
| TTI1       | -0.032 | 7.705E-01 | 8.308E-01 |
| PPP4R3A    | -0.032 | 7.618E-01 | 8.064E-01 |
| FAM24B     | -0.032 | 9.092E-01 | 7.543E-01 |
| MIR1293    | -0.032 | NA        | 7.972E-01 |
| IDH3B      | -0.032 | 7.671E-01 | 8.527E-01 |
| CCDC81     | -0.032 | 8.671E-01 | 7.937E-01 |
| ANGEL2     | -0.032 | 7.357E-01 | 8.755E-01 |
| BORCS6     | -0.032 | 8.120E-01 | 9.474E-01 |
| GNA15      | -0.032 | 8.918E-01 | 8.096E-01 |
| NMT1       | -0.032 | 6.751E-01 | 7.771E-01 |
| EVL        | -0.032 | 8.693E-01 | 8.524E-01 |
| SF3A1      | -0.032 | 7.433E-01 | 8.403E-01 |

|           |        |           |           |
|-----------|--------|-----------|-----------|
| MAN2B1    | -0.032 | 7.945E-01 | 8.458E-01 |
| POLA2     | -0.032 | 8.279E-01 | 8.524E-01 |
| FAT1      | -0.032 | 8.972E-01 | 7.679E-01 |
| PHF5A     | -0.032 | 7.433E-01 | 7.872E-01 |
| CREBZF    | -0.032 | 8.081E-01 | 9.563E-01 |
| FARSB     | -0.032 | 7.932E-01 | 8.146E-01 |
| MON1B     | -0.032 | 7.598E-01 | 8.355E-01 |
| GNS       | -0.032 | 8.278E-01 | 8.194E-01 |
| ATP6V0A2  | -0.032 | 7.247E-01 | 9.693E-01 |
| GIGYF2    | -0.032 | 7.610E-01 | 9.648E-01 |
| CCL5      | -0.032 | 9.475E-01 | 7.935E-01 |
| HSPBAP1   | -0.032 | 8.171E-01 | 7.479E-01 |
| MT1F      | -0.032 | 9.207E-01 | 8.292E-01 |
| SPTLC2    | -0.032 | 7.800E-01 | 7.876E-01 |
| MAP3K11   | -0.032 | 7.677E-01 | 8.414E-01 |
| SLC6A14   | -0.032 | 9.616E-01 | 8.134E-01 |
| ZCCHC2    | -0.032 | 8.015E-01 | 9.955E-01 |
| LYPLA2    | -0.032 | 7.953E-01 | 9.932E-01 |
| ZNF304    | -0.032 | 8.168E-01 | 9.924E-01 |
| KRTAP12-1 | -0.032 | NA        | 8.434E-01 |
| MEX3B     | -0.033 | 9.257E-01 | 9.517E-01 |
| ATF5      | -0.033 | 8.460E-01 | 8.584E-01 |
| COPS3     | -0.033 | 8.109E-01 | 8.585E-01 |
| PSMD13    | -0.033 | 7.795E-01 | 8.547E-01 |
| CCDC167   | -0.033 | 8.528E-01 | 8.310E-01 |
| RANGAP1   | -0.033 | 7.923E-01 | 7.621E-01 |
| PHF21A    | -0.033 | 7.757E-01 | 8.890E-01 |
| ACBD6     | -0.033 | 7.290E-01 | 7.439E-01 |
| SMIM26    | -0.033 | 7.793E-01 | 9.172E-01 |
| SBK3      | -0.033 | 9.488E-01 | 8.098E-01 |
| HCFC1     | -0.033 | 7.093E-01 | 8.190E-01 |
| ZNF43     | -0.033 | 9.056E-01 | 8.132E-01 |
| HIVEP2    | -0.033 | 8.423E-01 | 8.734E-01 |
| RBFA      | -0.033 | 7.868E-01 | 8.150E-01 |
| ZSCAN32   | -0.033 | 8.090E-01 | 9.595E-01 |
| FAM118A   | -0.033 | 8.880E-01 | 9.158E-01 |
| GJB3      | -0.033 | 9.229E-01 | 8.917E-01 |
| PFDN6     | -0.033 | 8.269E-01 | 9.322E-01 |
| RNF10     | -0.033 | 6.967E-01 | 9.680E-01 |
| TSSK3     | -0.033 | 9.010E-01 | 9.450E-01 |
| SDHA      | -0.033 | 8.306E-01 | 9.151E-01 |
| RFX3      | -0.033 | 8.666E-01 | 9.641E-01 |
| ANK3      | -0.033 | 8.883E-01 | 9.240E-01 |
| PSMD11    | -0.033 | 8.261E-01 | 8.328E-01 |
| KMT2C     | -0.033 | 8.265E-01 | 7.970E-01 |
| GOLGA8Q   | -0.033 | 9.598E-01 | 8.270E-01 |
| MYCBP     | -0.033 | 7.909E-01 | 8.417E-01 |
| TXNDC11   | -0.033 | 7.771E-01 | 8.960E-01 |
| PITPNA    | -0.033 | 7.085E-01 | 9.073E-01 |
| ANKLE2    | -0.033 | 7.601E-01 | 8.806E-01 |

|            |        |           |           |
|------------|--------|-----------|-----------|
| RIMBP3B    | -0.033 | 9.600E-01 | 8.161E-01 |
| DCUN1D4    | -0.033 | 7.489E-01 | 8.883E-01 |
| COPS9      | -0.033 | 8.320E-01 | 8.070E-01 |
| ANAPC11    | -0.033 | 8.292E-01 | 8.421E-01 |
| PDCD5      | -0.033 | 7.978E-01 | 9.051E-01 |
| AC012184.2 | -0.033 | NA        | 7.785E-01 |
| ZNF451     | -0.033 | 7.125E-01 | 9.369E-01 |
| CDC25A     | -0.033 | 8.720E-01 | 7.876E-01 |
| WFDC11     | -0.033 | 9.783E-01 | 7.961E-01 |
| EXOC2      | -0.033 | 7.321E-01 | 7.030E-01 |
| TPGS2      | -0.033 | 7.893E-01 | 8.470E-01 |
| BET1L      | -0.033 | 7.106E-01 | 9.582E-01 |
| SLC38A9    | -0.033 | 8.253E-01 | 9.310E-01 |
| EVI5L      | -0.033 | 8.113E-01 | 9.340E-01 |
| MAP3K9     | -0.033 | 8.741E-01 | 8.110E-01 |
| CYTH2      | -0.033 | 7.968E-01 | 8.190E-01 |
| STAT5A     | -0.033 | 8.602E-01 | 8.465E-01 |
| CDC26      | -0.034 | 7.782E-01 | 9.575E-01 |
| ICA1L      | -0.034 | 8.760E-01 | 9.047E-01 |
| SMIM10L2B  | -0.034 | 8.900E-01 | 8.255E-01 |
| NGRN       | -0.034 | 7.585E-01 | 9.220E-01 |
| POFUT1     | -0.034 | 8.196E-01 | 9.063E-01 |
| MADD       | -0.034 | 7.781E-01 | 8.944E-01 |
| MIR8081    | -0.034 | NA        | 9.476E-01 |
| MIR4757    | -0.034 | NA        | 9.964E-01 |
| NPBWR2     | -0.034 | NA        | 9.964E-01 |
| C22orf39   | -0.034 | 7.931E-01 | 9.964E-01 |
| AKIP1      | -0.034 | 8.240E-01 | 9.964E-01 |
| RNF144B    | -0.034 | 9.092E-01 | 9.964E-01 |
| AC007906.2 | -0.034 | 9.450E-01 | 9.964E-01 |
| SPIN3      | -0.034 | 8.348E-01 | 9.964E-01 |
| USP4       | -0.034 | 7.606E-01 | 9.964E-01 |
| HTD2       | -0.034 | 9.032E-01 | 9.964E-01 |
| TUBGCP4    | -0.034 | 7.671E-01 | 9.964E-01 |
| COIL       | -0.034 | 7.607E-01 | 9.964E-01 |
| CIT        | -0.034 | 8.618E-01 | 9.964E-01 |
| AL049634.2 | -0.034 | 9.685E-01 | 9.964E-01 |
| SPINK13    | -0.034 | 9.582E-01 | 9.964E-01 |
| PANK2      | -0.034 | 7.299E-01 | 9.964E-01 |
| GTPBP10    | -0.034 | 6.848E-01 | 9.964E-01 |
| ISCA1      | -0.034 | 7.471E-01 | 9.964E-01 |
| MIR576     | -0.034 | NA        | 9.964E-01 |
| NAPEPLD    | -0.034 | 7.745E-01 | 9.964E-01 |
| ARL6IP5    | -0.034 | 8.192E-01 | 9.964E-01 |
| IQUB       | -0.034 | 8.995E-01 | 9.964E-01 |
| SNRPB2     | -0.034 | 7.519E-01 | 9.964E-01 |
| IFNGR2     | -0.034 | 7.867E-01 | 9.964E-01 |
| TRMT10A    | -0.034 | 8.171E-01 | 9.964E-01 |
| WNT8A      | -0.034 | NA        | 9.964E-01 |
| RPAP2      | -0.034 | 7.224E-01 | 9.964E-01 |

|           |        |           |           |
|-----------|--------|-----------|-----------|
| SOX5      | -0.034 | 9.133E-01 | 9.964E-01 |
| KCTD18    | -0.034 | 7.329E-01 | 9.964E-01 |
| MRPL20    | -0.034 | 7.639E-01 | 9.964E-01 |
| TMEM250   | -0.034 | 8.192E-01 | 9.964E-01 |
| RFT1      | -0.034 | 7.203E-01 | 9.964E-01 |
| DKK1      | -0.034 | 9.502E-01 | 9.964E-01 |
| PNKP      | -0.034 | 8.004E-01 | 9.964E-01 |
| SLC12A9   | -0.034 | 7.852E-01 | 9.964E-01 |
| MIR4792   | -0.034 | NA        | 9.964E-01 |
| ELMO2     | -0.034 | 7.244E-01 | 9.964E-01 |
| RLN2      | -0.034 | 9.394E-01 | 9.964E-01 |
| UGT1A9    | -0.034 | 9.610E-01 | 9.964E-01 |
| TAS2R7    | -0.034 | NA        | 9.964E-01 |
| INS-IGF2  | -0.034 | NA        | 9.964E-01 |
| NKX2-6    | -0.034 | NA        | 9.964E-01 |
| MIR548Q   | -0.034 | NA        | 9.964E-01 |
| MIR5680   | -0.034 | NA        | 9.964E-01 |
| OR6C76    | -0.034 | NA        | 9.964E-01 |
| MIR5186   | -0.034 | NA        | 9.964E-01 |
| MIR1302-7 | -0.034 | NA        | 9.964E-01 |
| PRAMEF5   | -0.034 | NA        | 9.964E-01 |
| PEX11G    | -0.034 | 8.775E-01 | 9.964E-01 |
| MRPL17    | -0.035 | 7.633E-01 | 9.964E-01 |
| CLDN12    | -0.035 | 7.759E-01 | 9.964E-01 |
| BLOC1S2   | -0.035 | 7.719E-01 | 9.964E-01 |
| SHARPIN   | -0.035 | 7.684E-01 | 9.964E-01 |
| PCDHB3    | -0.035 | 9.367E-01 | 9.964E-01 |
| SLC25A17  | -0.035 | 6.632E-01 | 9.964E-01 |
| FHL5      | -0.035 | 9.226E-01 | 9.964E-01 |
| TJAP1     | -0.035 | 7.601E-01 | 9.964E-01 |
| ZC2HC1C   | -0.035 | 8.600E-01 | 9.964E-01 |
| VPS13D    | -0.035 | 7.435E-01 | 9.964E-01 |
| EYA3      | -0.035 | 7.084E-01 | 9.964E-01 |
| COPZ1     | -0.035 | 6.834E-01 | 9.964E-01 |
| RPRD1A    | -0.035 | 7.777E-01 | 7.783E-01 |
| ZNF34     | -0.035 | 8.050E-01 | 7.084E-01 |
| MIR3165   | -0.035 | NA        | 8.380E-01 |
| TXNRD1    | -0.035 | 9.113E-01 | 8.104E-01 |
| SRCAP     | -0.035 | 6.915E-01 | 7.587E-01 |
| MARK4     | -0.035 | 7.180E-01 | 8.703E-01 |
| ZNRF2     | -0.035 | 7.868E-01 | 8.305E-01 |
| MIR561    | -0.035 | NA        | 9.400E-01 |
| MIR3945   | -0.035 | NA        | 7.486E-01 |
| NRF1      | -0.035 | 5.610E-01 | 8.324E-01 |
| SARS2     | -0.035 | 8.403E-01 | 8.509E-01 |
| B4GALNT2  | -0.035 | 9.646E-01 | 8.729E-01 |
| ERBB3     | -0.035 | 9.061E-01 | 8.617E-01 |
| MIR320C1  | -0.035 | NA        | 8.927E-01 |
| CCNJL     | -0.035 | 9.145E-01 | 7.803E-01 |
| SMIM7     | -0.035 | 7.101E-01 | 8.919E-01 |

|          |        |           |           |
|----------|--------|-----------|-----------|
| KCNAB1   | -0.035 | 8.741E-01 | 9.583E-01 |
| NFE2L2   | -0.035 | 8.143E-01 | 8.792E-01 |
| SERF2    | -0.035 | 8.169E-01 | 8.086E-01 |
| RPS6KB2  | -0.035 | 7.850E-01 | 8.236E-01 |
| KHDRBS2  | -0.035 | 9.508E-01 | 7.891E-01 |
| SMPD4    | -0.035 | 6.884E-01 | 8.089E-01 |
| CELF4    | -0.035 | 9.351E-01 | 7.925E-01 |
| XPNPEP1  | -0.035 | 6.655E-01 | 8.198E-01 |
| TIAL1    | -0.035 | 6.410E-01 | 8.443E-01 |
| PRPF38A  | -0.035 | 6.630E-01 | 8.530E-01 |
| RAB32    | -0.035 | 8.838E-01 | 9.018E-01 |
| MRPS34   | -0.035 | 7.875E-01 | 8.690E-01 |
| TRIM36   | -0.035 | 9.340E-01 | 9.749E-01 |
| TPRKB    | -0.035 | 7.435E-01 | 9.914E-01 |
| GIT2     | -0.035 | 7.483E-01 | 8.721E-01 |
| LONP2    | -0.036 | 7.415E-01 | 8.115E-01 |
| VPS9D1   | -0.036 | 8.278E-01 | 8.371E-01 |
| CCDC83   | -0.036 | 9.502E-01 | 8.744E-01 |
| MIR6806  | -0.036 | NA        | 8.432E-01 |
| OR10V1   | -0.036 | NA        | 8.389E-01 |
| PI4K2A   | -0.036 | 7.945E-01 | 9.405E-01 |
| NMRAL1   | -0.036 | 8.109E-01 | 9.262E-01 |
| ZNF343   | -0.036 | 7.218E-01 | 8.109E-01 |
| USF1     | -0.036 | 8.369E-01 | 9.638E-01 |
| ATG10    | -0.036 | 7.624E-01 | 8.430E-01 |
| KIF18A   | -0.036 | 8.781E-01 | 9.160E-01 |
| FAM185A  | -0.036 | 7.428E-01 | 8.938E-01 |
| NCAPH2   | -0.036 | 7.851E-01 | 9.453E-01 |
| ATAD2B   | -0.036 | 7.692E-01 | 8.167E-01 |
| CSNK2A1  | -0.036 | 6.848E-01 | 8.834E-01 |
| SLX4IP   | -0.036 | 7.835E-01 | 9.606E-01 |
| ATIC     | -0.036 | 7.921E-01 | 8.839E-01 |
| FAM32A   | -0.036 | 6.607E-01 | 7.997E-01 |
| ZNF518A  | -0.036 | 8.384E-01 | 8.613E-01 |
| NLRC4    | -0.036 | 8.692E-01 | 9.785E-01 |
| NF1      | -0.036 | 7.874E-01 | 8.180E-01 |
| CASKIN1  | -0.036 | 9.394E-01 | 9.197E-01 |
| SPIN2A   | -0.036 | 9.094E-01 | 8.722E-01 |
| C14orf80 | -0.036 | 8.283E-01 | 9.710E-01 |
| ADRM1    | -0.036 | 7.380E-01 | 8.537E-01 |
| RHBDF1   | -0.036 | 8.446E-01 | 7.944E-01 |
| TEX264   | -0.036 | 8.006E-01 | 7.782E-01 |
| RPGRIP1  | -0.036 | 8.786E-01 | 7.900E-01 |
| ACO2     | -0.036 | 7.694E-01 | 9.452E-01 |
| GFRA1    | -0.036 | 9.455E-01 | 7.824E-01 |
| SS18L1   | -0.036 | 8.192E-01 | 8.890E-01 |
| CRMP1    | -0.036 | 8.880E-01 | 9.485E-01 |
| DCUN1D5  | -0.036 | 8.257E-01 | 9.449E-01 |
| UBE2J1   | -0.036 | 7.084E-01 | 9.424E-01 |
| ARRDC1   | -0.036 | 8.295E-01 | 8.358E-01 |

|            |        |           |           |
|------------|--------|-----------|-----------|
| FBXO46     | -0.036 | 7.674E-01 | 8.239E-01 |
| ATAD3B     | -0.036 | 8.328E-01 | 9.028E-01 |
| TNP2       | -0.036 | NA        | 9.586E-01 |
| STARD7     | -0.036 | 7.122E-01 | 8.289E-01 |
| RHOBTB1    | -0.036 | 8.692E-01 | 9.162E-01 |
| RBM12      | -0.036 | 6.549E-01 | 8.441E-01 |
| CS         | -0.036 | 6.871E-01 | 8.260E-01 |
| SYN2       | -0.036 | 9.324E-01 | 8.201E-01 |
| TAF8       | -0.037 | 6.839E-01 | 9.006E-01 |
| LEO1       | -0.037 | 7.224E-01 | 7.395E-01 |
| SAMD1      | -0.037 | 7.656E-01 | 7.938E-01 |
| NUTM2E     | -0.037 | 9.545E-01 | 9.611E-01 |
| SCNM1      | -0.037 | 7.955E-01 | 9.953E-01 |
| TRIM69     | -0.037 | 8.452E-01 | 9.949E-01 |
| EIF2S3     | -0.037 | 7.443E-01 | 9.946E-01 |
| ATXN3      | -0.037 | 6.432E-01 | 8.520E-01 |
| AC092587.1 | -0.037 | 8.846E-01 | 8.254E-01 |
| CNDP2      | -0.037 | 8.070E-01 | 8.490E-01 |
| REST       | -0.037 | 6.949E-01 | 9.543E-01 |
| PER2       | -0.037 | 8.448E-01 | 8.552E-01 |
| MMP15      | -0.037 | 8.706E-01 | 8.792E-01 |
| SNX3       | -0.037 | 7.128E-01 | 8.101E-01 |
| OMA1       | -0.037 | 7.595E-01 | 8.435E-01 |
| KIAA1191   | -0.037 | 6.680E-01 | 8.226E-01 |
| NNT        | -0.037 | 8.186E-01 | 8.765E-01 |
| CBR3       | -0.037 | 9.041E-01 | 9.754E-01 |
| FP565260.7 | -0.037 | 8.076E-01 | 9.376E-01 |
| ICE2       | -0.037 | 6.915E-01 | 8.518E-01 |
| TNRC18     | -0.037 | 7.322E-01 | 8.875E-01 |
| KRIT1      | -0.037 | 7.535E-01 | 9.432E-01 |
| CDCP1      | -0.037 | 8.806E-01 | 8.519E-01 |
| NDUFA4     | -0.037 | 7.350E-01 | 8.572E-01 |
| AFAP1L1    | -0.037 | 8.755E-01 | 9.122E-01 |
| MRPL55     | -0.037 | 7.863E-01 | 8.532E-01 |
| CACHD1     | -0.037 | 9.027E-01 | 8.405E-01 |
| ESYT1      | -0.037 | 7.691E-01 | 8.649E-01 |
| NDUFS1     | -0.037 | 7.193E-01 | 9.094E-01 |
| ZNF563     | -0.037 | 8.211E-01 | 9.873E-01 |
| MMACHC     | -0.037 | 7.612E-01 | 8.182E-01 |
| POLR3D     | -0.037 | 7.633E-01 | 9.636E-01 |
| OR2Z1      | -0.037 | NA        | 9.171E-01 |
| MIR519B    | -0.037 | NA        | 7.956E-01 |
| DHODH      | -0.037 | 7.443E-01 | 7.941E-01 |
| BBS1       | -0.037 | 7.910E-01 | 8.395E-01 |
| ZNF200     | -0.037 | 6.988E-01 | 8.237E-01 |
| GGTLC2     | -0.037 | 9.680E-01 | 9.428E-01 |
| TUBB2B     | -0.037 | 9.356E-01 | 9.431E-01 |
| BCAP31     | -0.037 | 7.832E-01 | 9.510E-01 |
| ARHGEF7    | -0.037 | 7.645E-01 | 8.286E-01 |
| AKAP11     | -0.037 | 7.912E-01 | 9.802E-01 |

|          |        |           |           |
|----------|--------|-----------|-----------|
| TEX33    | -0.037 | NA        | 9.408E-01 |
| SENP1    | -0.038 | 7.295E-01 | 8.196E-01 |
| FAM217B  | -0.038 | 7.874E-01 | 8.224E-01 |
| PARP11   | -0.038 | 8.750E-01 | 8.841E-01 |
| PNRC1    | -0.038 | 8.177E-01 | 8.772E-01 |
| ZNF654   | -0.038 | 7.874E-01 | 9.461E-01 |
| RNF146   | -0.038 | 7.046E-01 | 8.599E-01 |
| SLC7A3   | -0.038 | 9.590E-01 | 9.454E-01 |
| IQCH     | -0.038 | 8.452E-01 | 8.628E-01 |
| BLOC1S5  | -0.038 | 7.154E-01 | 9.039E-01 |
| NUTM2A   | -0.038 | 8.878E-01 | 8.545E-01 |
| ACTR3    | -0.038 | 7.295E-01 | 9.024E-01 |
| IER2     | -0.038 | 8.278E-01 | 9.292E-01 |
| DIDO1    | -0.038 | 6.861E-01 | 9.287E-01 |
| IMP3     | -0.038 | 7.580E-01 | 8.251E-01 |
| USP47    | -0.038 | 6.593E-01 | 9.895E-01 |
| PHF1     | -0.038 | 7.519E-01 | 9.901E-01 |
| ABCD1    | -0.038 | 8.403E-01 | 9.911E-01 |
| IKBKAP   | -0.038 | 7.353E-01 | 9.220E-01 |
| ASCC2    | -0.038 | 8.540E-01 | 9.924E-01 |
| TRUB1    | -0.038 | 7.628E-01 | 9.490E-01 |
| YES1     | -0.038 | 7.725E-01 | 8.439E-01 |
| ZNF664   | -0.038 | 7.778E-01 | 8.587E-01 |
| RDH11    | -0.038 | 7.585E-01 | 8.829E-01 |
| PFN2     | -0.038 | 8.590E-01 | 8.248E-01 |
| RBMX2    | -0.038 | 7.321E-01 | 8.762E-01 |
| KMT2B    | -0.038 | 7.325E-01 | 8.621E-01 |
| ZFYVE1   | -0.038 | 6.737E-01 | 9.852E-01 |
| HNRNPM   | -0.038 | 6.235E-01 | 8.267E-01 |
| ECSIT    | -0.038 | 7.671E-01 | 8.795E-01 |
| RAF1     | -0.038 | 8.006E-01 | 8.770E-01 |
| ELF4     | -0.038 | 7.972E-01 | 8.787E-01 |
| ANAPC5   | -0.038 | 6.482E-01 | 9.079E-01 |
| PRAMEF15 | -0.038 | NA        | 9.523E-01 |
| PFKFB2   | -0.038 | 8.487E-01 | 8.638E-01 |
| GLS      | -0.038 | 8.354E-01 | 9.622E-01 |
| RNF41    | -0.038 | 6.477E-01 | 8.070E-01 |
| MED12L   | -0.038 | 9.081E-01 | 8.397E-01 |
| ACAN     | -0.038 | 9.202E-01 | 9.232E-01 |
| PCSK9    | -0.038 | 9.502E-01 | 8.643E-01 |
| DCAF4    | -0.038 | 7.502E-01 | 8.883E-01 |
| LAMTOR1  | -0.038 | 7.405E-01 | 9.034E-01 |
| PXMP2    | -0.038 | 8.398E-01 | 8.869E-01 |
| DBNL     | -0.038 | 7.334E-01 | 9.625E-01 |
| CLDN1    | -0.038 | 9.208E-01 | 8.878E-01 |
| ZNF821   | -0.038 | 7.981E-01 | 8.806E-01 |
| RRP12    | -0.038 | 7.653E-01 | 9.653E-01 |
| MRPL53   | -0.039 | 7.770E-01 | 8.820E-01 |
| CDK1     | -0.039 | 8.373E-01 | 9.509E-01 |
| SKIV2L   | -0.039 | 6.545E-01 | 8.506E-01 |

|            |        |           |           |
|------------|--------|-----------|-----------|
| CARS2      | -0.039 | 7.446E-01 | 8.261E-01 |
| USO1       | -0.039 | 7.193E-01 | 9.223E-01 |
| RFLNB      | -0.039 | 8.775E-01 | 8.796E-01 |
| SRSF9      | -0.039 | 6.751E-01 | 9.425E-01 |
| DNAJA1     | -0.039 | 8.062E-01 | 8.479E-01 |
| GPD2       | -0.039 | 7.939E-01 | 8.782E-01 |
| TBC1D13    | -0.039 | 7.759E-01 | 9.231E-01 |
| BRWD3      | -0.039 | 7.868E-01 | 8.984E-01 |
| UPB1       | -0.039 | 9.152E-01 | 9.929E-01 |
| DPH2       | -0.039 | 7.283E-01 | 9.061E-01 |
| UTS2B      | -0.039 | 9.127E-01 | 8.972E-01 |
| C10orf113  | -0.039 | 9.435E-01 | 9.538E-01 |
| MTBP       | -0.039 | 8.306E-01 | 8.625E-01 |
| PEX14      | -0.039 | 6.870E-01 | 9.660E-01 |
| ARL6IP6    | -0.039 | 7.666E-01 | 8.913E-01 |
| MIR548AL   | -0.039 | NA        | 8.737E-01 |
| AF241726.2 | -0.039 | NA        | 8.609E-01 |
| AMY1C      | -0.039 | NA        | 8.207E-01 |
| MIR3182    | -0.039 | NA        | 8.632E-01 |
| MIR4437    | -0.039 | NA        | 9.906E-01 |
| MIR4705    | -0.039 | NA        | 8.675E-01 |
| MIR4803    | -0.039 | NA        | 8.908E-01 |
| MIR548Z    | -0.039 | NA        | 8.852E-01 |
| MIR6771    | -0.039 | NA        | 8.660E-01 |
| OR4C5      | -0.039 | NA        | 9.579E-01 |
| OR51S1     | -0.039 | NA        | 9.517E-01 |
| OR5M3      | -0.039 | NA        | 9.102E-01 |
| AC011452.1 | -0.039 | NA        | 8.484E-01 |
| AC018709.1 | -0.039 | NA        | 9.276E-01 |
| DEFB110    | -0.039 | NA        | 8.974E-01 |
| FAM230A    | -0.039 | NA        | 8.675E-01 |
| FAM231A    | -0.039 | NA        | 9.671E-01 |
| IFNA16     | -0.039 | NA        | 9.214E-01 |
| MIR154     | -0.039 | NA        | 8.845E-01 |
| MIR3681    | -0.039 | NA        | 8.947E-01 |
| MIR412     | -0.039 | NA        | 8.788E-01 |
| MIR4276    | -0.039 | NA        | 9.570E-01 |
| MIR450A1   | -0.039 | NA        | 9.307E-01 |
| MIR496     | -0.039 | NA        | 8.800E-01 |
| MIR575     | -0.039 | NA        | 9.076E-01 |
| MIR595     | -0.039 | NA        | 9.172E-01 |
| MIR6794    | -0.039 | NA        | 8.715E-01 |
| MIR6798    | -0.039 | NA        | 8.751E-01 |
| MIR6857    | -0.039 | NA        | 9.976E-01 |
| OR14A2     | -0.039 | NA        | 9.976E-01 |
| OR51F2     | -0.039 | NA        | 9.973E-01 |
| OR5K4      | -0.039 | NA        | 9.973E-01 |
| PGA4       | -0.039 | NA        | 9.973E-01 |
| SLC36A2    | -0.039 | 9.481E-01 | 9.973E-01 |
| BUD23      | -0.039 | 7.176E-01 | 9.970E-01 |



|          |        |           |           |
|----------|--------|-----------|-----------|
| COQ5     | -0.039 | 6.951E-01 | 9.970E-01 |
| PDE3B    | -0.039 | 8.999E-01 | 9.968E-01 |
| POLR2B   | -0.039 | 7.084E-01 | 9.967E-01 |
| U2AF2    | -0.039 | 5.956E-01 | 9.967E-01 |
| WDR37    | -0.039 | 7.257E-01 | 8.513E-01 |
| MRGPRX2  | -0.039 | 9.634E-01 | 9.004E-01 |
| SELENOK  | -0.039 | 7.421E-01 | 8.884E-01 |
| NME1     | -0.039 | 7.918E-01 | 9.140E-01 |
| FAM209A  | -0.039 | 8.882E-01 | 8.831E-01 |
| KIAA1468 | -0.039 | 7.937E-01 | 9.702E-01 |
| TP53I13  | -0.039 | 8.386E-01 | 8.660E-01 |
| GNG7     | -0.039 | 9.075E-01 | 8.892E-01 |
| ALDOA    | -0.039 | 8.032E-01 | 8.899E-01 |
| NMU      | -0.039 | 9.333E-01 | 9.238E-01 |
| ANAPC13  | -0.039 | 6.683E-01 | 8.219E-01 |
| LYRM2    | -0.039 | 6.632E-01 | 9.226E-01 |
| NAMPT    | -0.039 | 8.759E-01 | 8.576E-01 |
| NCAPD2   | -0.039 | 8.207E-01 | 8.863E-01 |
| MIR4778  | -0.039 | NA        | 8.522E-01 |
| HS6ST1   | -0.039 | 8.400E-01 | 8.857E-01 |
| ZNF19    | -0.039 | 8.160E-01 | 9.473E-01 |
| UGT1A4   | -0.039 | 9.469E-01 | 8.525E-01 |
| PAFAH1B3 | -0.039 | 8.472E-01 | 8.490E-01 |
| RPUSD4   | -0.039 | 7.046E-01 | 8.881E-01 |
| ZNF391   | -0.039 | 8.666E-01 | 9.110E-01 |
| CSNK2A2  | -0.040 | 6.348E-01 | 9.768E-01 |
| NDUFAF3  | -0.040 | 7.893E-01 | 9.531E-01 |
| COPS7B   | -0.040 | 6.492E-01 | 9.047E-01 |
| FXR2     | -0.040 | 6.882E-01 | 8.837E-01 |
| SKP1     | -0.040 | 6.410E-01 | 8.977E-01 |
| LBHD1    | -0.040 | 8.329E-01 | 8.740E-01 |
| ZNF394   | -0.040 | 6.702E-01 | 9.654E-01 |
| C21orf2  | -0.040 | 8.202E-01 | 8.574E-01 |
| ERCC3    | -0.040 | 5.691E-01 | 8.615E-01 |
| SRM      | -0.040 | 7.789E-01 | 9.335E-01 |
| MRPS16   | -0.040 | 7.056E-01 | 8.962E-01 |
| PIK3R3   | -0.040 | 8.475E-01 | 8.876E-01 |
| APEX1    | -0.040 | 6.657E-01 | 9.326E-01 |
| CERKL    | -0.040 | 8.933E-01 | 9.022E-01 |
| PTCH2    | -0.040 | 8.815E-01 | 9.403E-01 |
| ZNFX1    | -0.040 | 7.883E-01 | 8.760E-01 |
| VWA2     | -0.040 | 9.311E-01 | 9.048E-01 |
| ACYP1    | -0.040 | 7.962E-01 | 9.911E-01 |
| FAM234A  | -0.040 | 7.816E-01 | 9.916E-01 |
| UBE2I    | -0.040 | 6.324E-01 | 8.871E-01 |
| ZNF616   | -0.040 | 7.688E-01 | 8.639E-01 |
| KMT5C    | -0.040 | 8.158E-01 | 9.928E-01 |
| BOD1L1   | -0.040 | 7.691E-01 | 9.851E-01 |
| GMEB1    | -0.040 | 6.307E-01 | 9.407E-01 |
| CXCR5    | -0.040 | 9.424E-01 | 8.783E-01 |

|            |        |           |           |
|------------|--------|-----------|-----------|
| NUP93      | -0.040 | 6.961E-01 | 8.908E-01 |
| ZC3H18     | -0.040 | 6.261E-01 | 9.135E-01 |
| EMSY       | -0.040 | 7.125E-01 | 9.177E-01 |
| GOLGA6C    | -0.040 | NA        | 9.711E-01 |
| SLC35G4    | -0.040 | NA        | 9.411E-01 |
| OR1L4      | -0.040 | NA        | 8.806E-01 |
| MIR301A    | -0.040 | NA        | 8.833E-01 |
| OR51I2     | -0.040 | NA        | 9.728E-01 |
| PYY        | -0.040 | 9.013E-01 | 9.791E-01 |
| UGT1A10    | -0.040 | 9.600E-01 | 8.763E-01 |
| MPG        | -0.040 | 7.732E-01 | 9.510E-01 |
| PSPH       | -0.040 | 8.474E-01 | 8.921E-01 |
| FAM84B     | -0.040 | 8.541E-01 | 8.937E-01 |
| FAM58A     | -0.040 | 7.509E-01 | 9.087E-01 |
| UAP1L1     | -0.040 | 8.600E-01 | 8.989E-01 |
| CASP3      | -0.040 | 7.122E-01 | 9.445E-01 |
| FZD2       | -0.040 | 8.861E-01 | 9.867E-01 |
| CSTF1      | -0.040 | 6.261E-01 | 9.645E-01 |
| AC093525.2 | -0.040 | 9.296E-01 | 8.745E-01 |
| VIPAS39    | -0.040 | 6.364E-01 | 9.651E-01 |
| MED12      | -0.040 | 7.171E-01 | 9.084E-01 |
| CRYL1      | -0.040 | 8.469E-01 | 9.087E-01 |
| DNAJA3     | -0.040 | 6.593E-01 | 9.087E-01 |
| TMEM185B   | -0.040 | 7.671E-01 | 9.091E-01 |
| SLTM       | -0.040 | 6.717E-01 | 9.083E-01 |
| CCDC174    | -0.040 | 7.662E-01 | 9.319E-01 |
| CD4        | -0.040 | 8.999E-01 | 8.761E-01 |
| ARHGEF15   | -0.040 | 8.632E-01 | 8.746E-01 |
| PLEKHM2    | -0.040 | 6.142E-01 | 8.824E-01 |
| RBBP5      | -0.040 | 6.922E-01 | 9.866E-01 |
| AL049844.3 | -0.040 | NA        | 8.842E-01 |
| RB1CC1     | -0.041 | 7.267E-01 | 9.912E-01 |
| TXNL1      | -0.041 | 6.533E-01 | 8.984E-01 |
| CEPT1      | -0.041 | 7.161E-01 | 9.949E-01 |
| PMF1       | -0.041 | 7.357E-01 | 9.953E-01 |
| UPRT       | -0.041 | 7.135E-01 | 8.668E-01 |
| ASB6       | -0.041 | 6.637E-01 | 9.026E-01 |
| ETAA1      | -0.041 | 6.387E-01 | 8.825E-01 |
| AFDN       | -0.041 | 7.909E-01 | 9.063E-01 |
| AL449266.1 | -0.041 | 9.400E-01 | 9.805E-01 |
| SPC24      | -0.041 | 8.448E-01 | 8.930E-01 |
| RHNO1      | -0.041 | 7.117E-01 | 8.799E-01 |
| EMG1       | -0.041 | 8.211E-01 | 9.157E-01 |
| ITGB8      | -0.041 | 9.131E-01 | 9.937E-01 |
| AAMP       | -0.041 | 6.454E-01 | 9.874E-01 |
| DAXX       | -0.041 | 6.012E-01 | 8.933E-01 |
| CENPT      | -0.041 | 7.816E-01 | 9.770E-01 |
| SPPL2C     | -0.041 | NA        | 8.926E-01 |
| CHST14     | -0.041 | 7.589E-01 | 9.056E-01 |
| IRAK2      | -0.041 | 8.868E-01 | 9.112E-01 |

|            |        |           |           |
|------------|--------|-----------|-----------|
| DPP9       | -0.041 | 6.777E-01 | 9.024E-01 |
| TIMM8A     | -0.041 | 7.782E-01 | 9.366E-01 |
| DDX19B     | -0.041 | 7.116E-01 | 9.128E-01 |
| GVQW1      | -0.041 | 8.210E-01 | 9.002E-01 |
| PHF12      | -0.041 | 7.257E-01 | 9.275E-01 |
| A4GALT     | -0.041 | 8.755E-01 | 9.578E-01 |
| TMEM249    | -0.041 | 8.986E-01 | 9.048E-01 |
| CDC42SE1   | -0.041 | 7.245E-01 | 9.066E-01 |
| PDE6A      | -0.041 | 9.103E-01 | 9.442E-01 |
| GINS2      | -0.041 | 8.351E-01 | 9.458E-01 |
| AC007192.1 | -0.041 | 9.188E-01 | 9.466E-01 |
| PANK4      | -0.041 | 6.134E-01 | 9.309E-01 |
| TRA2B      | -0.041 | 5.577E-01 | 9.899E-01 |
| IL1B       | -0.041 | 9.311E-01 | 9.076E-01 |
| SHPK       | -0.041 | 7.852E-01 | 9.780E-01 |
| GTF2B      | -0.041 | 6.784E-01 | 8.765E-01 |
| SLC7A1     | -0.041 | 8.671E-01 | 9.242E-01 |
| HTR1F      | -0.041 | 9.270E-01 | 8.896E-01 |
| C1orf35    | -0.041 | 7.311E-01 | 8.888E-01 |
| CD81       | -0.041 | 7.624E-01 | 9.692E-01 |
| MRPS18A    | -0.041 | 7.191E-01 | 9.127E-01 |
| DRC7       | -0.041 | 9.317E-01 | 8.939E-01 |
| AC010422.3 | -0.041 | 8.500E-01 | 9.268E-01 |
| COX19      | -0.041 | 7.131E-01 | 8.854E-01 |
| MGME1      | -0.041 | 7.125E-01 | 9.983E-01 |
| UBE2F      | -0.041 | 7.643E-01 | 9.983E-01 |
| MIR4254    | -0.041 | NA        | 9.983E-01 |
| UBXN1      | -0.042 | 7.235E-01 | 9.983E-01 |
| ZNF579     | -0.042 | 8.433E-01 | 9.983E-01 |
| FLOT2      | -0.042 | 7.860E-01 | 9.983E-01 |
| WBP4       | -0.042 | 6.769E-01 | 9.983E-01 |
| MRPL45     | -0.042 | 7.508E-01 | 9.983E-01 |
| NSUN5      | -0.042 | 7.715E-01 | 9.983E-01 |
| AC010619.1 | -0.042 | NA        | 9.983E-01 |
| MIR4277    | -0.042 | NA        | 9.983E-01 |
| KRTAP10-8  | -0.042 | NA        | 9.983E-01 |
| MIR4533    | -0.042 | NA        | 9.983E-01 |
| MIR517A    | -0.042 | NA        | 9.983E-01 |
| MIR526A1   | -0.042 | NA        | 9.983E-01 |
| OR6C4      | -0.042 | NA        | 9.983E-01 |
| OR6C68     | -0.042 | NA        | 9.983E-01 |
| AL020996.2 | -0.042 | NA        | 9.753E-01 |
| ANKRD60    | -0.042 | NA        | 9.338E-01 |
| MIR1976    | -0.042 | NA        | 9.924E-01 |
| MIR378E    | -0.042 | NA        | 9.284E-01 |
| MIR6859-3  | -0.042 | NA        | 9.133E-01 |
| OR2T35     | -0.042 | NA        | 9.271E-01 |
| OR4K13     | -0.042 | NA        | 9.277E-01 |
| MIR4441    | -0.042 | NA        | 9.945E-01 |
| USP17L4    | -0.042 | NA        | 9.440E-01 |

|            |        |           |           |
|------------|--------|-----------|-----------|
| TICAM2     | -0.042 | 8.888E-01 | 9.538E-01 |
| SESTD1     | -0.042 | 8.235E-01 | 9.127E-01 |
| 44080.000  | -0.042 | 8.544E-01 | 9.093E-01 |
| PPCS       | -0.042 | 6.958E-01 | 9.860E-01 |
| TRUB2      | -0.042 | 6.958E-01 | 9.005E-01 |
| IWS1       | -0.042 | 5.597E-01 | 9.415E-01 |
| PCNX4      | -0.042 | 7.149E-01 | 9.032E-01 |
| SDHAF3     | -0.042 | 7.864E-01 | 9.565E-01 |
| PRKRA      | -0.042 | 6.048E-01 | 9.055E-01 |
| SAT1       | -0.042 | 8.540E-01 | 9.383E-01 |
| AL354761.2 | -0.042 | NA        | 9.189E-01 |
| GABPA      | -0.042 | 6.757E-01 | 9.693E-01 |
| CDH19      | -0.042 | 9.545E-01 | 9.221E-01 |
| FAM186B    | -0.042 | 8.005E-01 | 9.343E-01 |
| CRLS1      | -0.042 | 6.905E-01 | 9.626E-01 |
| CARM1      | -0.042 | 6.710E-01 | 9.571E-01 |
| MOAP1      | -0.042 | 7.214E-01 | 9.842E-01 |
| ADPRM      | -0.042 | 7.396E-01 | 9.265E-01 |
| ELL        | -0.042 | 5.846E-01 | 9.601E-01 |
| MYO19      | -0.042 | 7.589E-01 | 9.939E-01 |
| AIFM2      | -0.042 | 8.286E-01 | 9.145E-01 |
| CD2BP2     | -0.042 | 6.641E-01 | 9.236E-01 |
| ZSCAN2     | -0.042 | 8.065E-01 | 9.267E-01 |
| PDPR       | -0.042 | 8.007E-01 | 9.814E-01 |
| SLBP       | -0.042 | 7.503E-01 | 9.681E-01 |
| IDNK       | -0.042 | 8.235E-01 | 9.132E-01 |
| PSMB3      | -0.042 | 7.779E-01 | 9.637E-01 |
| FUCA2      | -0.042 | 7.101E-01 | 9.313E-01 |
| PRKRIP1    | -0.042 | 7.017E-01 | 9.251E-01 |
| ELANE      | -0.042 | 9.380E-01 | 9.301E-01 |
| VPS33B     | -0.042 | 5.966E-01 | 9.227E-01 |
| WRN        | -0.042 | 7.759E-01 | 9.276E-01 |
| TRAIP      | -0.042 | 8.083E-01 | 9.924E-01 |
| KNOP1      | -0.042 | 7.224E-01 | 9.094E-01 |
| ZNF69      | -0.042 | 8.835E-01 | 9.239E-01 |
| RSF1       | -0.042 | 7.084E-01 | 9.798E-01 |
| AEN        | -0.042 | 7.597E-01 | 9.736E-01 |
| SLC22A2    | -0.042 | 9.481E-01 | 9.875E-01 |
| CCDC192    | -0.042 | 8.495E-01 | 9.576E-01 |
| MRPL24     | -0.043 | 7.643E-01 | 9.365E-01 |
| ZNF853     | -0.043 | 8.834E-01 | 9.582E-01 |
| AASDHPPT   | -0.043 | 7.295E-01 | 9.231E-01 |
| TSTA3      | -0.043 | 7.729E-01 | 9.878E-01 |
| CMSS1      | -0.043 | 7.623E-01 | 9.424E-01 |
| IFIT5      | -0.043 | 8.425E-01 | 9.699E-01 |
| GTF3C4     | -0.043 | 7.381E-01 | 9.765E-01 |
| CLUAP1     | -0.043 | 7.887E-01 | 9.958E-01 |
| TMEM138    | -0.043 | 6.917E-01 | 9.465E-01 |
| CTTNBP2    | -0.043 | 9.370E-01 | 9.333E-01 |
| POLR2F     | -0.043 | 8.888E-01 | 9.966E-01 |

|            |        |           |           |
|------------|--------|-----------|-----------|
| C5orf22    | -0.043 | 7.480E-01 | 9.484E-01 |
| CCDC191    | -0.043 | 8.317E-01 | 9.053E-01 |
| MAJIN      | -0.043 | 9.516E-01 | 9.174E-01 |
| RCOR2      | -0.043 | 9.030E-01 | 9.114E-01 |
| ERP44      | -0.043 | 6.826E-01 | 9.666E-01 |
| ZNF888     | -0.043 | 9.026E-01 | 9.084E-01 |
| XPO5       | -0.043 | 7.159E-01 | 9.323E-01 |
| MBNL1      | -0.043 | 7.095E-01 | 9.742E-01 |
| AL139353.1 | -0.043 | 8.352E-01 | 9.178E-01 |
| C2orf49    | -0.043 | 5.430E-01 | 9.886E-01 |
| MIR5095    | -0.043 | NA        | 9.542E-01 |
| MIR6885    | -0.043 | NA        | 9.795E-01 |
| BCAR1      | -0.043 | 7.754E-01 | 9.032E-01 |
| MIR6825    | -0.043 | NA        | 9.962E-01 |
| OR14J1     | -0.043 | NA        | 9.247E-01 |
| DCTN4      | -0.043 | 6.625E-01 | 9.494E-01 |
| PLBD1      | -0.043 | 8.644E-01 | 9.428E-01 |
| PALM2      | -0.043 | 9.167E-01 | 9.721E-01 |
| EML6       | -0.043 | 9.152E-01 | 9.628E-01 |
| FAM214A    | -0.043 | 8.206E-01 | 9.604E-01 |
| HSPA4L     | -0.043 | 9.033E-01 | 9.068E-01 |
| ERI2       | -0.043 | 7.585E-01 | 9.222E-01 |
| ZNF239     | -0.043 | 8.672E-01 | 9.963E-01 |
| APEH       | -0.043 | 7.083E-01 | 8.634E-01 |
| ME2        | -0.043 | 7.364E-01 | 9.319E-01 |
| STAM2      | -0.043 | 6.398E-01 | 9.701E-01 |
| NACAD      | -0.043 | 8.969E-01 | 9.730E-01 |
| NR2C2AP    | -0.043 | 7.473E-01 | 9.973E-01 |
| PYGL       | -0.043 | 8.668E-01 | 9.974E-01 |
| FAM173A    | -0.043 | 8.211E-01 | 9.761E-01 |
| ZNF649     | -0.043 | 8.478E-01 | 9.838E-01 |
| PLK1       | -0.043 | 8.450E-01 | 9.942E-01 |
| EFR3A      | -0.043 | 7.430E-01 | 9.296E-01 |
| ST3GAL4    | -0.043 | 8.890E-01 | 9.178E-01 |
| CBX8       | -0.043 | 7.875E-01 | 9.649E-01 |
| KHDRBS1    | -0.043 | 4.755E-01 | 9.397E-01 |
| SMYD4      | -0.044 | 6.870E-01 | 9.278E-01 |
| TTL        | -0.044 | 7.598E-01 | 9.549E-01 |
| BRD2       | -0.044 | 6.156E-01 | 9.763E-01 |
| POU3F1     | -0.044 | 9.378E-01 | 9.830E-01 |
| C19orf18   | -0.044 | 9.042E-01 | 9.560E-01 |
| SDHAF2     | -0.044 | 7.313E-01 | 9.894E-01 |
| SUPT3H     | -0.044 | 7.579E-01 | 9.500E-01 |
| CBWD1      | -0.044 | 7.587E-01 | 9.867E-01 |
| NUDT21     | -0.044 | 6.873E-01 | 9.514E-01 |
| SYNJ2      | -0.044 | 7.525E-01 | 9.314E-01 |
| TOM1L2     | -0.044 | 8.182E-01 | 9.117E-01 |
| JMJD4      | -0.044 | 7.107E-01 | 9.827E-01 |
| CDPF1      | -0.044 | 7.029E-01 | 9.408E-01 |
| SUDS3      | -0.044 | 6.779E-01 | 9.680E-01 |

|          |        |           |           |
|----------|--------|-----------|-----------|
| G3BP2    | -0.044 | 6.669E-01 | 9.581E-01 |
| NAE1     | -0.044 | 6.607E-01 | 9.397E-01 |
| MTMR1    | -0.044 | 7.088E-01 | 9.512E-01 |
| ZNF627   | -0.044 | 7.493E-01 | 9.956E-01 |
| GTF2A2   | -0.044 | 6.364E-01 | 9.534E-01 |
| SLC38A8  | -0.044 | 9.575E-01 | 9.848E-01 |
| GPR135   | -0.044 | 8.512E-01 | 9.636E-01 |
| SPATA5L1 | -0.044 | 6.572E-01 | 9.599E-01 |
| COMMD4   | -0.044 | 7.322E-01 | 9.681E-01 |
| TMEM196  | -0.044 | 9.711E-01 | 9.717E-01 |
| FBXW4    | -0.044 | 7.413E-01 | 9.489E-01 |
| SNX1     | -0.044 | 6.162E-01 | 9.677E-01 |
| SDHAF4   | -0.044 | 7.695E-01 | 9.520E-01 |
| BBS7     | -0.044 | 6.551E-01 | 9.573E-01 |
| SASS6    | -0.044 | 7.674E-01 | 9.744E-01 |
| SUPV3L1  | -0.044 | 6.127E-01 | 9.404E-01 |
| ARNT2    | -0.044 | 8.969E-01 | 9.966E-01 |
| SLC38A6  | -0.044 | 7.328E-01 | 9.414E-01 |
| PCNT     | -0.044 | 6.936E-01 | 9.580E-01 |
| NDUFB5   | -0.044 | 6.338E-01 | 9.662E-01 |
| FAM96B   | -0.044 | 7.124E-01 | 9.870E-01 |
| PNPLA8   | -0.044 | 7.257E-01 | 9.768E-01 |
| PLEKHJ1  | -0.044 | 7.678E-01 | 9.402E-01 |
| AURKB    | -0.044 | 8.377E-01 | 9.677E-01 |
| CARMIL1  | -0.044 | 8.341E-01 | 9.545E-01 |
| LRRC37A2 | -0.044 | 8.172E-01 | 9.960E-01 |
| ZNF594   | -0.044 | 8.034E-01 | 9.990E-01 |
| DRAM2    | -0.044 | 6.321E-01 | 9.990E-01 |
| POLD2    | -0.044 | 7.627E-01 | 9.990E-01 |
| APLN     | -0.044 | 9.103E-01 | 9.990E-01 |
| IRF2BP1  | -0.044 | 6.882E-01 | 9.990E-01 |
| ARMC1    | -0.044 | 6.315E-01 | 9.990E-01 |
| SLK      | -0.044 | 7.599E-01 | 9.990E-01 |
| NSMCE3   | -0.044 | 7.073E-01 | 9.990E-01 |
| MXD1     | -0.044 | 8.590E-01 | 9.990E-01 |
| MAK16    | -0.044 | 7.107E-01 | 9.990E-01 |
| MAFB     | -0.044 | 8.880E-01 | 9.990E-01 |
| RIPK1    | -0.044 | 6.429E-01 | 9.990E-01 |
| EIF2D    | -0.044 | 7.084E-01 | 9.990E-01 |
| MAD2L1BP | -0.044 | 6.848E-01 | 9.990E-01 |
| ZSCAN16  | -0.044 | 8.384E-01 | 9.990E-01 |
| DUS2     | -0.044 | 7.564E-01 | 9.990E-01 |
| CIAPIN1  | -0.044 | 6.314E-01 | 9.990E-01 |
| MIR626   | -0.044 | NA        | 9.990E-01 |
| MIR5704  | -0.044 | NA        | 9.990E-01 |
| MIR8061  | -0.044 | NA        | 9.990E-01 |
| MIR190B  | -0.044 | NA        | 9.990E-01 |
| MIR6074  | -0.044 | NA        | 9.990E-01 |
| MIR1250  | -0.044 | NA        | 9.990E-01 |
| DPF2     | -0.044 | 5.559E-01 | 9.990E-01 |

|           |        |           |           |
|-----------|--------|-----------|-----------|
| RYR3      | -0.044 | 8.542E-01 | 9.990E-01 |
| ZNF230    | -0.044 | 7.382E-01 | 9.990E-01 |
| MIIIP     | -0.044 | 7.722E-01 | 9.990E-01 |
| FAM126B   | -0.044 | 7.214E-01 | 9.990E-01 |
| CELF6     | -0.044 | 9.358E-01 | 9.836E-01 |
| ATP5H     | -0.044 | 6.708E-01 | 9.484E-01 |
| MRPL51    | -0.045 | 7.085E-01 | 9.850E-01 |
| LILRA2    | -0.045 | 8.997E-01 | 9.894E-01 |
| CLTB      | -0.045 | 8.345E-01 | 9.578E-01 |
| POLR2H    | -0.045 | 6.805E-01 | 9.957E-01 |
| C12orf4   | -0.045 | 6.374E-01 | 9.523E-01 |
| HDAC4     | -0.045 | 7.918E-01 | 9.605E-01 |
| NUTF2     | -0.045 | 6.915E-01 | 9.747E-01 |
| MIR6877   | -0.045 | NA        | 9.963E-01 |
| MYEOV     | -0.045 | 9.400E-01 | 9.693E-01 |
| CFAP73    | -0.045 | 8.755E-01 | 9.818E-01 |
| IFT81     | -0.045 | 7.339E-01 | 9.872E-01 |
| COG3      | -0.045 | 7.161E-01 | 9.888E-01 |
| SIGLEC15  | -0.045 | 9.241E-01 | 9.615E-01 |
| RPS6KB1   | -0.045 | 6.262E-01 | 9.495E-01 |
| FANCA     | -0.045 | 8.055E-01 | 9.441E-01 |
| PADI2     | -0.045 | 9.060E-01 | 9.701E-01 |
| NXN       | -0.045 | 8.823E-01 | 9.849E-01 |
| RX5-TAX1B | -0.045 | 8.034E-01 | 9.664E-01 |
| TTF2      | -0.045 | 7.421E-01 | 9.841E-01 |
| MIB1      | -0.045 | 7.422E-01 | 9.773E-01 |
| DPYSL4    | -0.045 | 9.344E-01 | 9.411E-01 |
| ARHGAP30  | -0.045 | 8.559E-01 | 9.782E-01 |
| OSBPL1A   | -0.045 | 8.345E-01 | 9.646E-01 |
| COX15     | -0.045 | 5.984E-01 | 9.824E-01 |
| SRP72     | -0.045 | 5.804E-01 | 9.482E-01 |
| LRCH1     | -0.045 | 7.301E-01 | 9.650E-01 |
| INTS3     | -0.045 | 7.644E-01 | 9.714E-01 |
| DNAJC19   | -0.045 | 6.578E-01 | 9.687E-01 |
| COMMD3    | -0.045 | 7.257E-01 | 9.883E-01 |
| VTA1      | -0.045 | 5.965E-01 | 9.561E-01 |
| KANSL3    | -0.045 | 5.923E-01 | 9.868E-01 |
| OSBPL6    | -0.045 | 9.218E-01 | 9.626E-01 |
| C16orf72  | -0.045 | 7.244E-01 | 9.746E-01 |
| ATG16L1   | -0.045 | 6.257E-01 | 9.898E-01 |
| ALG12     | -0.045 | 6.571E-01 | 9.881E-01 |
| FIBP      | -0.045 | 7.211E-01 | 9.708E-01 |
| FUT4      | -0.045 | 8.622E-01 | 9.676E-01 |
| TCEANC2   | -0.045 | 6.377E-01 | 9.979E-01 |
| KNTC1     | -0.045 | 7.761E-01 | 9.886E-01 |
| IMPACT    | -0.045 | 7.301E-01 | 9.939E-01 |
| CASC1     | -0.045 | 8.762E-01 | 9.821E-01 |
| LRRC4C    | -0.045 | 9.246E-01 | 9.553E-01 |
| GLTPD2    | -0.045 | 8.475E-01 | 9.625E-01 |
| PITX2     | -0.045 | 9.035E-01 | 9.590E-01 |

|            |        |           |           |
|------------|--------|-----------|-----------|
| WBP11      | -0.046 | 6.190E-01 | 9.640E-01 |
| TRIM51     | -0.046 | NA        | 9.707E-01 |
| MIR597     | -0.046 | NA        | 9.886E-01 |
| RESP18     | -0.046 | NA        | 9.830E-01 |
| MIR8086    | -0.046 | NA        | 9.617E-01 |
| CCDC93     | -0.046 | 6.886E-01 | 9.722E-01 |
| EXOC5      | -0.046 | 6.848E-01 | 9.764E-01 |
| RAP2A      | -0.046 | 7.275E-01 | 9.891E-01 |
| VPS39      | -0.046 | 5.735E-01 | 9.873E-01 |
| PARP12     | -0.046 | 8.189E-01 | 9.649E-01 |
| KCNK4      | -0.046 | 9.489E-01 | 9.606E-01 |
| TCAIM      | -0.046 | 7.321E-01 | 9.775E-01 |
| CUL3       | -0.046 | 6.324E-01 | 9.725E-01 |
| SALL1      | -0.046 | 9.133E-01 | 9.895E-01 |
| CHRAC1     | -0.046 | 6.511E-01 | 9.682E-01 |
| NFRKB      | -0.046 | 6.634E-01 | 9.602E-01 |
| AC105001.2 | -0.046 | NA        | 9.750E-01 |
| CENPC      | -0.046 | 6.364E-01 | 9.819E-01 |
| PTER       | -0.046 | 7.719E-01 | 9.941E-01 |
| TTC17      | -0.046 | 6.245E-01 | 9.746E-01 |
| PDE12      | -0.046 | 6.262E-01 | 9.960E-01 |
| TMEM121    | -0.046 | 8.755E-01 | 9.636E-01 |
| ORC4       | -0.046 | 5.659E-01 | 9.970E-01 |
| TPI1       | -0.046 | 7.227E-01 | 9.847E-01 |
| WDR73      | -0.046 | 6.736E-01 | 9.899E-01 |
| HIST1H4B   | -0.046 | 9.128E-01 | 9.992E-01 |
| MAF1       | -0.046 | 6.321E-01 | 9.990E-01 |
| LYRM9      | -0.046 | 8.386E-01 | 9.990E-01 |
| SHC2       | -0.046 | 8.880E-01 | 9.989E-01 |
| DCTN5      | -0.046 | 6.058E-01 | 9.989E-01 |
| RAPGEF1    | -0.046 | 7.595E-01 | 9.926E-01 |
| AC072022.1 | -0.046 | 8.671E-01 | 9.912E-01 |
| PTCH1      | -0.046 | 8.154E-01 | 9.755E-01 |
| DHX34      | -0.046 | 7.063E-01 | 9.924E-01 |
| SBF2       | -0.046 | 7.315E-01 | 9.669E-01 |
| ZNF549     | -0.046 | 7.879E-01 | 9.829E-01 |
| S100A3     | -0.046 | 8.997E-01 | 9.853E-01 |
| WRAP73     | -0.046 | 6.410E-01 | 9.775E-01 |
| CENPM      | -0.046 | 8.217E-01 | 9.883E-01 |
| PAK1IP1    | -0.046 | 6.751E-01 | 9.802E-01 |
| TTBK2      | -0.046 | 6.787E-01 | 9.926E-01 |
| CCDC117    | -0.046 | 8.211E-01 | 9.929E-01 |
| FRG1       | -0.046 | 6.748E-01 | 9.933E-01 |
| ZNF510     | -0.046 | 6.620E-01 | 9.742E-01 |
| BOLA3      | -0.046 | 7.152E-01 | 9.913E-01 |
| PSMD5      | -0.046 | 7.250E-01 | 9.934E-01 |
| ARHGAP17   | -0.046 | 6.543E-01 | 9.848E-01 |
| SPANXN1    | -0.046 | NA        | 9.805E-01 |
| ACTR3B     | -0.046 | 7.702E-01 | 9.821E-01 |
| APOC4      | -0.046 | NA        | 9.783E-01 |



|            |        |           |           |
|------------|--------|-----------|-----------|
| LTK        | -0.046 | 9.208E-01 | 9.812E-01 |
| ARL6       | -0.046 | 6.714E-01 | 9.906E-01 |
| PIP4K2B    | -0.046 | 6.549E-01 | 9.827E-01 |
| GRM1       | -0.047 | 9.133E-01 | 9.937E-01 |
| EPHA8      | -0.047 | 9.436E-01 | 9.966E-01 |
| THUMPD1    | -0.047 | 6.416E-01 | 9.789E-01 |
| FAM173B    | -0.047 | 7.322E-01 | 9.980E-01 |
| CINP       | -0.047 | 6.933E-01 | 9.842E-01 |
| PDHA1      | -0.047 | 6.822E-01 | 9.858E-01 |
| COX6C      | -0.047 | 8.080E-01 | 9.830E-01 |
| CEP78      | -0.047 | 7.222E-01 | 9.798E-01 |
| UBOX5      | -0.047 | 6.471E-01 | 9.806E-01 |
| STOML2     | -0.047 | 7.280E-01 | 9.841E-01 |
| LSM3       | -0.047 | 7.433E-01 | 9.916E-01 |
| MED6       | -0.047 | 6.176E-01 | 9.974E-01 |
| PPP4R2     | -0.047 | 6.708E-01 | 9.842E-01 |
| UBL7       | -0.047 | 6.364E-01 | 9.798E-01 |
| ACTRT3     | -0.047 | 8.600E-01 | 9.911E-01 |
| CLSTN3     | -0.047 | 7.918E-01 | 9.960E-01 |
| STARD5     | -0.047 | 8.511E-01 | 9.869E-01 |
| CCDC166    | -0.047 | 9.473E-01 | 9.938E-01 |
| KXD1       | -0.047 | 5.140E-01 | 9.806E-01 |
| ZNF622     | -0.047 | 7.066E-01 | 9.904E-01 |
| TSN        | -0.047 | 5.690E-01 | 9.973E-01 |
| C16orf52   | -0.047 | 6.417E-01 | 9.974E-01 |
| KRTAP10-9  | -0.047 | NA        | 9.861E-01 |
| MIR887     | -0.047 | NA        | 9.881E-01 |
| AC012254.2 | -0.047 | NA        | 9.932E-01 |
| TAAR8      | -0.047 | NA        | 9.869E-01 |
| MIR361     | -0.047 | NA        | 9.907E-01 |
| OR13G1     | -0.047 | NA        | 9.880E-01 |
| MIR5706    | -0.047 | NA        | 9.869E-01 |
| OR4K1      | -0.047 | NA        | 9.933E-01 |
| AMER1      | -0.047 | 7.759E-01 | 9.898E-01 |
| FAM160B1   | -0.047 | 6.606E-01 | 9.862E-01 |
| GRAMD1A    | -0.047 | 7.902E-01 | 9.877E-01 |
| TNRC6B     | -0.047 | 6.410E-01 | 9.905E-01 |
| ARV1       | -0.047 | 6.609E-01 | 9.901E-01 |
| AHCY       | -0.047 | 7.151E-01 | 9.913E-01 |
| KLHL42     | -0.047 | 7.020E-01 | 9.866E-01 |
| GAS2L1     | -0.047 | 7.738E-01 | 9.935E-01 |
| AC011499.1 | -0.047 | 9.105E-01 | 9.883E-01 |
| MIR559     | -0.047 | 9.207E-01 | 9.900E-01 |
| ZNF707     | -0.047 | 6.549E-01 | 9.890E-01 |
| C10orf120  | -0.047 | NA        | 9.909E-01 |
| MED20      | -0.047 | 6.234E-01 | 9.941E-01 |
| SPACA7     | -0.047 | NA        | 9.947E-01 |
| BID        | -0.047 | 7.442E-01 | 9.918E-01 |
| OAZ1       | -0.048 | 6.823E-01 | 9.964E-01 |
| NXPH1      | -0.048 | 9.458E-01 | 9.914E-01 |

|            |        |           |           |
|------------|--------|-----------|-----------|
| ZNF789     | -0.048 | 7.519E-01 | 9.918E-01 |
| MIR128-1   | -0.048 | NA        | 9.964E-01 |
| SPG11      | -0.048 | 6.647E-01 | 9.916E-01 |
| INTS4      | -0.048 | 6.513E-01 | 9.912E-01 |
| PPP1R37    | -0.048 | 8.059E-01 | 9.930E-01 |
| AL096870.1 | -0.048 | 9.192E-01 | 9.925E-01 |
| MRC1       | -0.048 | 9.127E-01 | 9.903E-01 |
| TFIP11     | -0.048 | 6.324E-01 | 9.927E-01 |
| SNX13      | -0.048 | 7.001E-01 | 9.965E-01 |
| KMT5B      | -0.048 | 6.594E-01 | 9.940E-01 |
| LSM5       | -0.048 | 6.616E-01 | 9.987E-01 |
| PTP4A1     | -0.048 | 8.265E-01 | 9.959E-01 |
| CFAP97     | -0.048 | 7.014E-01 | 9.973E-01 |
| IL4R       | -0.048 | 8.032E-01 | 9.958E-01 |
| RBMXL2     | -0.048 | 9.370E-01 | 9.950E-01 |
| ZNF177     | -0.048 | 9.245E-01 | 9.987E-01 |
| ZNF737     | -0.048 | 9.133E-01 | 9.988E-01 |
| GABPB1     | -0.048 | 4.407E-01 | 9.998E-01 |
| PIAS2      | -0.048 | 7.285E-01 | 9.953E-01 |
| CEP97      | -0.048 | 7.093E-01 | 9.988E-01 |
| RWDD2A     | -0.048 | 7.198E-01 | 9.981E-01 |
| NHLRC2     | -0.048 | 5.957E-01 | 9.988E-01 |
| CLDN2      | -0.048 | 9.003E-01 | 9.969E-01 |
| SCFD1      | -0.048 | 5.344E-01 | 9.995E-01 |
| NAPB       | -0.048 | 6.777E-01 | 9.993E-01 |
| DDX41      | -0.048 | 5.508E-01 | 9.994E-01 |
| GGNBP2     | -0.048 | 5.241E-01 | 9.996E-01 |
| FANCD2     | -0.048 | 7.738E-01 | 9.997E-01 |
| LHPP       | -0.048 | 7.827E-01 | 9.999E-01 |
| FOXRED1    | -0.048 | 6.879E-01 | 1.000E+00 |
| IL20RB     | -0.048 | 9.296E-01 | 1.000E+00 |
| SRI        | -0.048 | 7.292E-01 | 9.993E-01 |
| LYL1       | -0.048 | 8.502E-01 | 9.999E-01 |
| LYPLA1     | -0.048 | 7.418E-01 | 9.992E-01 |
| OR10P1     | -0.048 | NA        | 9.990E-01 |
| MIR6792    | -0.048 | NA        | 9.979E-01 |
| MIA3       | -0.048 | 5.792E-01 | 9.979E-01 |
| HPDL       | -0.048 | 9.153E-01 | 9.970E-01 |
| TRAPPC12   | -0.048 | 5.601E-01 | 9.975E-01 |
| KIF13A     | -0.048 | 7.671E-01 | 9.977E-01 |
| DDX46      | -0.048 | 5.804E-01 | 9.995E-01 |
| KIAA0100   | -0.048 | 7.010E-01 | 9.965E-01 |
| ARL2       | -0.048 | 7.572E-01 | 9.965E-01 |
| PLCB3      | -0.048 | 6.847E-01 | 9.985E-01 |
| ZC3H15     | -0.048 | 5.975E-01 | 9.948E-01 |
| EMC8       | -0.048 | 5.867E-01 | 9.964E-01 |
| RAB35      | -0.048 | 5.331E-01 | 9.949E-01 |
| KLK1       | -0.048 | 9.251E-01 | 9.936E-01 |
| C8orf58    | -0.049 | 7.494E-01 | 9.985E-01 |
| DAB1       | -0.049 | 9.435E-01 | 9.962E-01 |

|            |        |           |           |
|------------|--------|-----------|-----------|
| WDR1       | -0.049 | 6.156E-01 | 9.983E-01 |
| ZC3H11A    | -0.049 | 5.460E-01 | 9.953E-01 |
| NDUFS3     | -0.049 | 6.469E-01 | 9.972E-01 |
| SLCO4A1    | -0.049 | 9.189E-01 | 9.909E-01 |
| MIR765     | -0.049 | 8.854E-01 | 9.956E-01 |
| C12orf65   | -0.049 | 5.859E-01 | 9.975E-01 |
| AC140504.1 | -0.049 | NA        | 9.933E-01 |
| CXorf51B   | -0.049 | NA        | 9.955E-01 |
| DEFB107A   | -0.049 | NA        | 9.934E-01 |
| MIR4429    | -0.049 | NA        | 9.927E-01 |
| MIR4528    | -0.049 | NA        | 9.998E-01 |
| MIR488     | -0.049 | NA        | 9.998E-01 |
| MIR548AE2  | -0.049 | NA        | 9.998E-01 |
| MIR548AP   | -0.049 | NA        | 9.998E-01 |
| MIR548H2   | -0.049 | NA        | 9.997E-01 |
| MIR6515    | -0.049 | NA        | 9.997E-01 |
| MIR6724-1  | -0.049 | NA        | 9.997E-01 |
| PRR23D1    | -0.049 | NA        | 9.914E-01 |
| TP53TG3B   | -0.049 | NA        | 9.941E-01 |
| AC010615.4 | -0.049 | NA        | 9.938E-01 |
| AC073612.1 | -0.049 | NA        | 9.932E-01 |
| AL929554.1 | -0.049 | NA        | 9.899E-01 |
| CFC1B      | -0.049 | NA        | 9.899E-01 |
| CT45A9     | -0.049 | NA        | 9.849E-01 |
| GIMD1      | -0.049 | NA        | 9.936E-01 |
| MIR105-2   | -0.049 | NA        | 9.853E-01 |
| MIR15B     | -0.049 | NA        | 9.867E-01 |
| MIR2113    | -0.049 | NA        | 9.991E-01 |
| MIR3152    | -0.049 | NA        | 9.909E-01 |
| MIR3179-3  | -0.049 | NA        | 9.886E-01 |
| MIR422A    | -0.049 | NA        | 9.868E-01 |
| MIR4791    | -0.049 | NA        | 9.847E-01 |
| MIR520D    | -0.049 | NA        | 9.892E-01 |
| MIR532     | -0.049 | NA        | 9.929E-01 |
| MIR548F5   | -0.049 | NA        | 9.840E-01 |
| MIR7151    | -0.049 | NA        | 9.861E-01 |
| MIR888     | -0.049 | NA        | 9.857E-01 |
| OR4K5      | -0.049 | NA        | 9.941E-01 |
| TRIM49D2   | -0.049 | NA        | 9.873E-01 |
| AC046185.1 | -0.049 | NA        | 9.922E-01 |
| AC083800.1 | -0.049 | NA        | 9.854E-01 |
| ARL14EPL   | -0.049 | NA        | 9.835E-01 |
| CU633980.1 | -0.049 | NA        | 9.951E-01 |
| ELOA3      | -0.049 | NA        | 9.774E-01 |
| ELOA3C     | -0.049 | NA        | 9.922E-01 |
| GAGE12E    | -0.049 | NA        | 9.815E-01 |
| KRTAP20-3  | -0.049 | NA        | 9.861E-01 |
| KRTAP25-1  | -0.049 | NA        | 9.989E-01 |
| MIR100     | -0.049 | NA        | 9.959E-01 |
| MIR30D     | -0.049 | NA        | 9.863E-01 |

|           |        |           |           |
|-----------|--------|-----------|-----------|
| MIR3156-2 | -0.049 | NA        | 9.861E-01 |
| MIR3167   | -0.049 | NA        | 9.877E-01 |
| MIR380    | -0.049 | NA        | 9.978E-01 |
| MIR381    | -0.049 | NA        | 9.846E-01 |
| MIR411    | -0.049 | NA        | 9.841E-01 |
| MIR4283-2 | -0.049 | NA        | 9.804E-01 |
| MIR4327   | -0.049 | NA        | 9.954E-01 |
| MIR449B   | -0.049 | NA        | 9.790E-01 |
| MIR485    | -0.049 | NA        | 9.963E-01 |
| MIR516A2  | -0.049 | NA        | 9.855E-01 |
| MIR518A2  | -0.049 | NA        | 9.830E-01 |
| MIR520A   | -0.049 | NA        | 9.747E-01 |
| MIR520B   | -0.049 | NA        | 9.825E-01 |
| MIR544A   | -0.049 | NA        | 9.794E-01 |
| MIR548AS  | -0.049 | NA        | 9.917E-01 |
| MIR5702   | -0.049 | NA        | 9.719E-01 |
| MIR5708   | -0.049 | NA        | 9.775E-01 |
| MIR6082   | -0.049 | NA        | 9.760E-01 |
| MIR654    | -0.049 | NA        | 9.981E-01 |
| MIR6760   | -0.049 | NA        | 9.794E-01 |
| MIR764    | -0.049 | NA        | 9.709E-01 |
| MIR891B   | -0.049 | NA        | 9.733E-01 |
| OR4A15    | -0.049 | NA        | 9.853E-01 |
| OR5L2     | -0.049 | NA        | 9.790E-01 |
| USP17L3   | -0.049 | NA        | 9.764E-01 |
| USP17L8   | -0.049 | NA        | 9.867E-01 |
| ZNF705B   | -0.049 | NA        | 9.714E-01 |
| PTGFRN    | -0.049 | 8.265E-01 | 9.761E-01 |
| PRB3      | -0.049 | 8.870E-01 | 9.872E-01 |
| OR2D2     | -0.049 | NA        | 9.678E-01 |
| PHC1      | -0.049 | 7.644E-01 | 9.686E-01 |
| RNASEK    | -0.049 | 6.384E-01 | 9.881E-01 |
| DDX24     | -0.049 | 6.147E-01 | 9.773E-01 |
| TPD52     | -0.049 | 7.812E-01 | 9.968E-01 |
| TIMELESS  | -0.049 | 7.300E-01 | 9.911E-01 |
| LYRM4     | -0.049 | 7.128E-01 | 9.866E-01 |
| PHF6      | -0.049 | 7.225E-01 | 9.884E-01 |
| ASIC1     | -0.049 | 8.868E-01 | 9.796E-01 |
| MIR6746   | -0.049 | 9.448E-01 | 9.896E-01 |
| CEP164    | -0.049 | 6.061E-01 | 9.714E-01 |
| DYDC2     | -0.049 | 9.400E-01 | 9.673E-01 |
| MIR4507   | -0.049 | NA        | 9.698E-01 |
| PSMB7     | -0.049 | 7.120E-01 | 9.592E-01 |
| SLC25A45  | -0.049 | 8.090E-01 | 9.543E-01 |
| ZNRF4     | -0.049 | NA        | 9.618E-01 |
| ONECUT2   | -0.049 | 9.306E-01 | 9.868E-01 |
| CCDC70    | -0.049 | 9.536E-01 | 9.760E-01 |
| ATP5B     | -0.049 | 6.236E-01 | 9.620E-01 |
| ATN1      | -0.049 | 5.975E-01 | 9.654E-01 |
| KRBA1     | -0.049 | 7.354E-01 | 9.658E-01 |

|           |        |           |           |
|-----------|--------|-----------|-----------|
| PLXNA2    | -0.049 | 8.153E-01 | 9.589E-01 |
| FZD6      | -0.049 | 8.069E-01 | 9.717E-01 |
| NSL1      | -0.049 | 5.759E-01 | 9.793E-01 |
| ZNF81     | -0.049 | 7.357E-01 | 9.687E-01 |
| TMEM200A  | -0.049 | 8.861E-01 | 9.735E-01 |
| MIR5691   | -0.049 | NA        | 9.822E-01 |
| CSE1L     | -0.049 | 6.708E-01 | 9.981E-01 |
| NR3C1     | -0.049 | 8.513E-01 | 9.986E-01 |
| GALNT1    | -0.049 | 8.199E-01 | 9.779E-01 |
| FLI1      | -0.050 | 8.449E-01 | 9.680E-01 |
| LUZP1     | -0.050 | 7.095E-01 | 9.828E-01 |
| PKNOX1    | -0.050 | 5.434E-01 | 9.654E-01 |
| C14orf119 | -0.050 | 5.650E-01 | 9.844E-01 |
| TGFBR2    | -0.050 | 8.031E-01 | 9.765E-01 |
| PPM1A     | -0.050 | 5.695E-01 | 9.625E-01 |
| SLITRK2   | -0.050 | 9.290E-01 | 9.971E-01 |
| KIAA0040  | -0.050 | 8.069E-01 | 9.541E-01 |
| SRD5A1    | -0.050 | 8.272E-01 | 9.742E-01 |
| MCM5      | -0.050 | 7.595E-01 | 9.853E-01 |
| GNG2      | -0.050 | 8.656E-01 | 9.902E-01 |
| RIPPLY1   | -0.050 | 9.041E-01 | 9.804E-01 |
| DBN1      | -0.050 | 8.414E-01 | 9.587E-01 |
| MAP3K2    | -0.050 | 5.851E-01 | 9.672E-01 |
| UTP23     | -0.050 | 6.470E-01 | 9.694E-01 |
| ZNF275    | -0.050 | 6.949E-01 | 9.830E-01 |
| PSMD9     | -0.050 | 6.100E-01 | 9.757E-01 |
| DUT       | -0.050 | 6.176E-01 | 9.837E-01 |
| TOGARAM1  | -0.050 | 6.640E-01 | 9.694E-01 |
| POP5      | -0.050 | 6.847E-01 | 9.861E-01 |
| TRIM64C   | -0.050 | NA        | 9.564E-01 |
| OR10A5    | -0.050 | NA        | 9.945E-01 |
| OOSP2     | -0.050 | NA        | 9.497E-01 |
| PRAMEF6   | -0.050 | NA        | 9.863E-01 |
| TLK1      | -0.050 | 6.008E-01 | 9.813E-01 |
| TRIM2     | -0.050 | 8.519E-01 | 9.569E-01 |
| CERS5     | -0.050 | 5.829E-01 | 9.493E-01 |
| ABHD10    | -0.050 | 5.759E-01 | 9.529E-01 |
| IL23A     | -0.050 | 8.863E-01 | 9.835E-01 |
| KMT5A     | -0.050 | 5.659E-01 | 9.792E-01 |
| ATP1B4    | -0.050 | 9.448E-01 | 9.650E-01 |
| KLF16     | -0.050 | 7.071E-01 | 9.599E-01 |
| REPIN1    | -0.050 | 7.442E-01 | 9.552E-01 |
| NPHP1     | -0.050 | 7.800E-01 | 9.691E-01 |
| ELOF1     | -0.050 | 6.363E-01 | 9.503E-01 |
| FGFRL1    | -0.050 | 8.369E-01 | 9.772E-01 |
| CTDSP2    | -0.050 | 6.988E-01 | 9.489E-01 |
| FGD4      | -0.050 | 7.722E-01 | 9.473E-01 |
| SAP30BP   | -0.050 | 5.373E-01 | 9.736E-01 |
| UBALD2    | -0.050 | 7.685E-01 | 9.761E-01 |
| KLHDC7B   | -0.050 | 9.274E-01 | 9.735E-01 |

|            |        |           |           |
|------------|--------|-----------|-----------|
| CNGA2      | -0.050 | NA        | 9.991E-01 |
| MRPL47     | -0.050 | 6.116E-01 | 9.991E-01 |
| PLP2       | -0.050 | 8.108E-01 | 9.990E-01 |
| MTHFD1     | -0.050 | 6.776E-01 | 9.989E-01 |
| MBTD1      | -0.050 | 7.538E-01 | 9.989E-01 |
| AMMECR1    | -0.050 | 7.617E-01 | 9.989E-01 |
| KLHL12     | -0.050 | 5.820E-01 | 9.989E-01 |
| FEN1       | -0.050 | 7.860E-01 | 9.989E-01 |
| MADCAM1    | -0.050 | 8.533E-01 | 9.506E-01 |
| ZBTB14     | -0.050 | 5.312E-01 | 9.494E-01 |
| PLEKHG2    | -0.050 | 7.912E-01 | 9.750E-01 |
| APOL4      | -0.050 | 8.873E-01 | 9.485E-01 |
| CAPN12     | -0.051 | 8.570E-01 | 9.775E-01 |
| ZSCAN5C    | -0.051 | 9.081E-01 | 9.514E-01 |
| RITA1      | -0.051 | 6.410E-01 | 9.456E-01 |
| MIR6499    | -0.051 | NA        | 9.857E-01 |
| AURKAIP1   | -0.051 | 7.317E-01 | 9.433E-01 |
| RP1        | -0.051 | 9.344E-01 | 9.736E-01 |
| TMEM80     | -0.051 | 7.193E-01 | 9.822E-01 |
| TMEM117    | -0.051 | 7.915E-01 | 9.777E-01 |
| MIR6833    | -0.051 | NA        | 9.266E-01 |
| GIPC1      | -0.051 | 7.172E-01 | 9.514E-01 |
| MAGOHB     | -0.051 | 6.637E-01 | 9.340E-01 |
| BEST1      | -0.051 | 8.259E-01 | 9.370E-01 |
| EDN3       | -0.051 | 9.618E-01 | 9.597E-01 |
| THAP9      | -0.051 | 6.582E-01 | 9.864E-01 |
| ELAVL4     | -0.051 | 9.095E-01 | 9.413E-01 |
| AGAP3      | -0.051 | 7.289E-01 | 9.561E-01 |
| SAP130     | -0.051 | 5.864E-01 | 9.790E-01 |
| ADAP2      | -0.051 | 8.448E-01 | 9.480E-01 |
| SUGT1      | -0.051 | 5.809E-01 | 9.511E-01 |
| MIR548C    | -0.051 | NA        | 9.547E-01 |
| PLRG1      | -0.051 | 5.689E-01 | 9.592E-01 |
| RBMS2      | -0.051 | 7.294E-01 | 9.411E-01 |
| AP002360.1 | -0.051 | 8.058E-01 | 9.851E-01 |
| TTC23      | -0.051 | 6.885E-01 | 9.799E-01 |
| ASB8       | -0.051 | 5.693E-01 | 9.396E-01 |
| TRIM33     | -0.051 | 6.787E-01 | 9.760E-01 |
| ZNF484     | -0.051 | 6.826E-01 | 9.386E-01 |
| EGFLAM     | -0.051 | 8.446E-01 | 9.815E-01 |
| RFX1       | -0.051 | 4.375E-01 | 9.328E-01 |
| HRH2       | -0.051 | 9.009E-01 | 9.547E-01 |
| MIR3941    | -0.051 | 9.436E-01 | 9.346E-01 |
| CSTF3      | -0.051 | 5.711E-01 | 9.680E-01 |
| MGEA5      | -0.051 | 5.533E-01 | 9.746E-01 |
| STYX       | -0.051 | 6.209E-01 | 9.792E-01 |
| FAM160A1   | -0.051 | 8.363E-01 | 9.416E-01 |
| FBXO22     | -0.051 | 5.804E-01 | 9.396E-01 |
| TMEM236    | -0.051 | 8.765E-01 | 9.403E-01 |
| IKZF5      | -0.051 | 6.245E-01 | 9.860E-01 |

|            |        |           |           |
|------------|--------|-----------|-----------|
| NFS1       | -0.051 | 5.942E-01 | 9.508E-01 |
| OSBPL8     | -0.051 | 7.037E-01 | 9.781E-01 |
| GCC2       | -0.051 | 6.826E-01 | 9.517E-01 |
| SEMA6C     | -0.051 | 8.289E-01 | 9.308E-01 |
| EIF6       | -0.051 | 6.508E-01 | 9.770E-01 |
| MIR3689F   | -0.051 | NA        | 9.773E-01 |
| DEFB104A   | -0.051 | NA        | 9.444E-01 |
| HIST1H2AA  | -0.051 | NA        | 9.862E-01 |
| KRTAP19-7  | -0.051 | NA        | 9.399E-01 |
| MIR527     | -0.051 | NA        | 9.437E-01 |
| MIR9-1     | -0.051 | NA        | 9.807E-01 |
| AL355315.1 | -0.051 | NA        | 9.876E-01 |
| ELOA3D     | -0.051 | NA        | 9.478E-01 |
| MIR1193    | -0.051 | NA        | 9.714E-01 |
| MIR1323    | -0.051 | NA        | 9.695E-01 |
| MIR2681    | -0.051 | NA        | 9.466E-01 |
| MIR337     | -0.051 | NA        | 9.492E-01 |
| MIR4270    | -0.051 | NA        | 9.618E-01 |
| MIR4310    | -0.051 | NA        | 9.414E-01 |
| MIR4425    | -0.051 | NA        | 9.454E-01 |
| MIR4438    | -0.051 | NA        | 9.855E-01 |
| MIR4466    | -0.051 | NA        | 9.360E-01 |
| MIR4490    | -0.051 | NA        | 9.797E-01 |
| MIR4693    | -0.051 | NA        | 9.333E-01 |
| MIR4747    | -0.051 | NA        | 9.834E-01 |
| MIR494     | -0.051 | NA        | 9.569E-01 |
| MIR5707    | -0.051 | NA        | 9.754E-01 |
| MIR6769B   | -0.051 | NA        | 9.338E-01 |
| OR10H4     | -0.051 | NA        | 9.839E-01 |
| OR10J5     | -0.051 | NA        | 9.502E-01 |
| OR2T6      | -0.051 | NA        | 9.774E-01 |
| C21orf140  | -0.051 | NA        | 9.660E-01 |
| MIR6749    | -0.051 | NA        | 9.285E-01 |
| MIR6811    | -0.051 | NA        | 9.338E-01 |
| MIR7-2     | -0.051 | NA        | 8.953E-01 |
| OR5M9      | -0.051 | NA        | 9.267E-01 |
| IL1A       | -0.052 | 9.207E-01 | 9.357E-01 |
| PLEKHG1    | -0.052 | 7.855E-01 | 9.417E-01 |
| S100A1     | -0.052 | 8.429E-01 | 9.706E-01 |
| POLG       | -0.052 | 5.516E-01 | 9.407E-01 |
| BTBD17     | -0.052 | 9.460E-01 | 9.772E-01 |
| MAP2       | -0.052 | 9.095E-01 | 9.309E-01 |
| FIZ1       | -0.052 | 6.533E-01 | 9.140E-01 |
| ATG4C      | -0.052 | 5.585E-01 | 9.169E-01 |
| NCOR2      | -0.052 | 6.848E-01 | 9.272E-01 |
| LRSAM1     | -0.052 | 6.324E-01 | 9.439E-01 |
| LURAP1     | -0.052 | 8.604E-01 | 9.125E-01 |
| ZNF253     | -0.052 | 8.071E-01 | 9.319E-01 |
| C1QC       | -0.052 | 9.009E-01 | 9.311E-01 |
| BRCA2      | -0.052 | 7.856E-01 | 9.359E-01 |

|            |        |           |           |
|------------|--------|-----------|-----------|
| IGSF22     | -0.052 | 8.340E-01 | 9.843E-01 |
| MSI1       | -0.052 | 9.192E-01 | 9.776E-01 |
| UCKL1      | -0.052 | 6.419E-01 | 9.903E-01 |
| TYW3       | -0.052 | 6.783E-01 | 9.479E-01 |
| ZCCHC18    | -0.052 | 8.765E-01 | 9.624E-01 |
| C3orf38    | -0.052 | 6.309E-01 | 9.966E-01 |
| ORC1       | -0.052 | 8.049E-01 | 9.967E-01 |
| PRKAA2     | -0.052 | 9.053E-01 | 9.967E-01 |
| DYNC1I2    | -0.052 | 5.699E-01 | 9.371E-01 |
| TTYH2      | -0.052 | 8.693E-01 | 9.674E-01 |
| ZNF799     | -0.052 | 7.918E-01 | 9.341E-01 |
| TBC1D9B    | -0.052 | 5.342E-01 | 9.417E-01 |
| LRCH3      | -0.052 | 4.837E-01 | 9.439E-01 |
| KLHL18     | -0.052 | 5.442E-01 | 9.513E-01 |
| NUDT9      | -0.052 | 6.743E-01 | 9.225E-01 |
| PHP3-ACAD  | -0.052 | 8.791E-01 | 9.324E-01 |
| MOB4       | -0.052 | 5.402E-01 | 9.673E-01 |
| TAB1       | -0.052 | 5.415E-01 | 9.151E-01 |
| NECTIN3    | -0.052 | 8.806E-01 | 9.418E-01 |
| RWDD4      | -0.052 | 5.026E-01 | 9.100E-01 |
| AC104151.1 | -0.052 | NA        | 9.534E-01 |
| TRIP6      | -0.052 | 7.402E-01 | 9.563E-01 |
| TSPAN18    | -0.053 | 8.688E-01 | 9.078E-01 |
| DENR       | -0.053 | 4.979E-01 | 9.457E-01 |
| CHMP6      | -0.053 | 6.861E-01 | 9.097E-01 |
| ORCS7-ASM  | -0.053 | NA        | 9.405E-01 |
| AC007731.5 | -0.053 | NA        | 9.091E-01 |
| GTPBP2     | -0.053 | 6.543E-01 | 8.923E-01 |
| POM121C    | -0.053 | 5.133E-01 | 9.816E-01 |
| SPCS3      | -0.053 | 5.552E-01 | 9.568E-01 |
| PMS2       | -0.053 | 6.574E-01 | 9.267E-01 |
| MIR4515    | -0.053 | NA        | 9.850E-01 |
| OR5B2      | -0.053 | NA        | 9.215E-01 |
| MIR519A1   | -0.053 | NA        | 9.392E-01 |
| MMP7       | -0.053 | 9.246E-01 | 9.072E-01 |
| RUVBL2     | -0.053 | 6.324E-01 | 9.321E-01 |
| LGMN       | -0.053 | 7.626E-01 | 9.200E-01 |
| EIF5       | -0.053 | 5.706E-01 | 9.767E-01 |
| SGK1       | -0.053 | 8.701E-01 | 9.324E-01 |
| COX8A      | -0.053 | 6.278E-01 | 9.787E-01 |
| AP1AR      | -0.053 | 6.641E-01 | 8.967E-01 |
| MIS18BP1   | -0.053 | 6.664E-01 | 9.185E-01 |
| DCAF7      | -0.053 | 5.815E-01 | 9.041E-01 |
| ZDHHC22    | -0.053 | 9.202E-01 | 9.347E-01 |
| BRD7       | -0.053 | 5.012E-01 | 9.398E-01 |
| BAIAP2L1   | -0.053 | 7.250E-01 | 9.284E-01 |
| DDX31      | -0.053 | 6.100E-01 | 9.097E-01 |
| GSS        | -0.053 | 5.970E-01 | 9.119E-01 |
| PPP2R5E    | -0.053 | 5.191E-01 | 9.484E-01 |
| NDUFAF7    | -0.053 | 4.705E-01 | 9.290E-01 |



|           |        |           |           |
|-----------|--------|-----------|-----------|
| TECPR2    | -0.053 | 5.696E-01 | 9.390E-01 |
| ACSS1     | -0.053 | 8.292E-01 | 9.160E-01 |
| STRIP1    | -0.053 | 4.881E-01 | 9.121E-01 |
| C18orf54  | -0.053 | 7.585E-01 | 9.090E-01 |
| NIPSNAP3B | -0.053 | 7.959E-01 | 9.045E-01 |
| IQCK      | -0.053 | 7.503E-01 | 9.935E-01 |
| EEF1E1    | -0.053 | 6.622E-01 | 9.983E-01 |
| MLST8     | -0.053 | 5.749E-01 | 9.983E-01 |
| WDR20     | -0.053 | 4.582E-01 | 9.983E-01 |
| ETFBKMT   | -0.053 | 6.471E-01 | 9.983E-01 |
| MIR4513   | -0.053 | NA        | 9.983E-01 |
| ZNF133    | -0.053 | 6.663E-01 | 9.983E-01 |
| ZNF480    | -0.053 | 7.151E-01 | 9.983E-01 |
| BMP2      | -0.053 | 8.997E-01 | 9.983E-01 |
| C8orf48   | -0.053 | 8.853E-01 | 9.983E-01 |
| PON2      | -0.053 | 7.575E-01 | 9.983E-01 |
| TLE3      | -0.053 | 7.167E-01 | 9.983E-01 |
| TTC13     | -0.053 | 6.262E-01 | 9.983E-01 |
| PCK2      | -0.053 | 7.364E-01 | 9.983E-01 |
| MIB2      | -0.053 | 6.628E-01 | 9.983E-01 |
| MEN1      | -0.053 | 5.425E-01 | 9.983E-01 |
| CTSB      | -0.053 | 8.211E-01 | 9.227E-01 |
| MTIF3     | -0.053 | 6.314E-01 | 9.588E-01 |
| TTK       | -0.053 | 7.879E-01 | 9.317E-01 |
| ANKMY1    | -0.054 | 6.748E-01 | 9.153E-01 |
| ANKRD55   | -0.054 | 9.023E-01 | 9.464E-01 |
| MIR320D1  | -0.054 | NA        | 9.196E-01 |
| UBTFL1    | -0.054 | NA        | 9.602E-01 |
| CXorf40B  | -0.054 | 6.465E-01 | 9.139E-01 |
| PDE8A     | -0.054 | 6.632E-01 | 9.368E-01 |
| RAC1      | -0.054 | 5.754E-01 | 9.075E-01 |
| SNAP23    | -0.054 | 5.415E-01 | 9.448E-01 |
| LTC4S     | -0.054 | 8.966E-01 | 9.673E-01 |
| ZKSCAN4   | -0.054 | 5.769E-01 | 9.802E-01 |
| PTOV1     | -0.054 | 6.571E-01 | 9.185E-01 |
| PAPOLA    | -0.054 | 4.803E-01 | 9.434E-01 |
| C14orf180 | -0.054 | 9.590E-01 | 9.199E-01 |
| MIR4677   | -0.054 | 8.936E-01 | 9.270E-01 |
| FLG2      | -0.054 | 9.518E-01 | 9.061E-01 |
| ZNF746    | -0.054 | 5.668E-01 | 9.596E-01 |
| ZFP41     | -0.054 | 7.635E-01 | 9.089E-01 |
| KCNN3     | -0.054 | 8.369E-01 | 9.579E-01 |
| RBM4      | -0.054 | 5.305E-01 | 9.056E-01 |
| SLC25A12  | -0.054 | 6.813E-01 | 8.964E-01 |
| DNAJB2    | -0.054 | 6.632E-01 | 9.419E-01 |
| PRCP      | -0.054 | 7.227E-01 | 9.290E-01 |
| BLNK      | -0.054 | 8.477E-01 | 9.486E-01 |
| KCNK5     | -0.054 | 8.632E-01 | 9.084E-01 |
| CYGB      | -0.054 | 8.374E-01 | 9.787E-01 |
| UXT       | -0.054 | 6.387E-01 | 9.587E-01 |

|           |        |           |           |
|-----------|--------|-----------|-----------|
| FCGRT     | -0.054 | 7.904E-01 | 9.446E-01 |
| KYAT3     | -0.054 | 6.089E-01 | 9.752E-01 |
| SUOX      | -0.054 | 7.805E-01 | 9.408E-01 |
| DDX52     | -0.054 | 6.048E-01 | 8.836E-01 |
| UBE2G2    | -0.054 | 5.380E-01 | 9.553E-01 |
| SOX11     | -0.054 | 8.966E-01 | 9.423E-01 |
| OR4N5     | -0.054 | NA        | 9.601E-01 |
| MIR6839   | -0.054 | NA        | 9.480E-01 |
| MIR1227   | -0.054 | NA        | 8.689E-01 |
| MIR6786   | -0.054 | NA        | 9.613E-01 |
| MIR620    | -0.054 | NA        | 8.823E-01 |
| OR4Q3     | -0.054 | NA        | 9.820E-01 |
| PRNT      | -0.054 | NA        | 9.512E-01 |
| MIR320C2  | -0.054 | NA        | 9.767E-01 |
| KRTAP20-1 | -0.054 | NA        | 9.258E-01 |
| MIR3144   | -0.054 | NA        | 9.291E-01 |
| IFNA7     | -0.054 | NA        | 9.604E-01 |
| MIR3973   | -0.054 | NA        | 9.180E-01 |
| OR2F2     | -0.054 | NA        | 9.117E-01 |
| SPANXN4   | -0.054 | NA        | 8.895E-01 |
| MIR525    | -0.054 | NA        | 9.129E-01 |
| SDR39U1   | -0.054 | 6.288E-01 | 9.037E-01 |
| EPS8      | -0.054 | 8.160E-01 | 9.204E-01 |
| TRMT61A   | -0.054 | 6.776E-01 | 9.229E-01 |
| DHX29     | -0.054 | 5.985E-01 | 9.084E-01 |
| ANAPC16   | -0.054 | 5.887E-01 | 9.560E-01 |
| AIP       | -0.055 | 6.507E-01 | 9.568E-01 |
| PDHB      | -0.055 | 5.315E-01 | 9.032E-01 |
| TRAP1     | -0.055 | 6.638E-01 | 9.721E-01 |
| USP50     | -0.055 | 8.773E-01 | 8.768E-01 |
| FZD4      | -0.055 | 8.195E-01 | 9.918E-01 |
| 43894.000 | -0.055 | 9.244E-01 | 9.595E-01 |
| LMF2      | -0.055 | 6.444E-01 | 9.966E-01 |
| SALL4     | -0.055 | 8.759E-01 | 9.961E-01 |
| MTURN     | -0.055 | 7.710E-01 | 9.961E-01 |
| ZFY       | -0.055 | 9.334E-01 | 9.961E-01 |
| PLEKHA6   | -0.055 | 8.421E-01 | 9.954E-01 |
| KDM8      | -0.055 | 6.118E-01 | 9.956E-01 |
| GYPB      | -0.055 | NA        | 9.956E-01 |
| LRRC61    | -0.055 | 7.963E-01 | 9.957E-01 |
| CHERP     | -0.055 | 5.024E-01 | 8.951E-01 |
| HMGXB4    | -0.055 | 6.348E-01 | 9.732E-01 |
| PANX2     | -0.055 | 8.858E-01 | 9.221E-01 |
| CYB561D1  | -0.055 | 7.448E-01 | 8.636E-01 |
| IKBIP     | -0.055 | 7.364E-01 | 9.680E-01 |
| YIPF5     | -0.055 | 5.747E-01 | 9.089E-01 |
| MIR7976   | -0.055 | NA        | 8.905E-01 |
| FDXR      | -0.055 | 7.542E-01 | 9.414E-01 |
| SPIN4     | -0.055 | 8.421E-01 | 9.432E-01 |
| KIAA1324L | -0.055 | 7.719E-01 | 8.965E-01 |

|            |        |           |           |
|------------|--------|-----------|-----------|
| CCM2       | -0.055 | 7.112E-01 | 9.523E-01 |
| TTC27      | -0.055 | 5.607E-01 | 9.509E-01 |
| ZXDA       | -0.055 | 7.021E-01 | 8.703E-01 |
| CCDC91     | -0.055 | 6.680E-01 | 9.247E-01 |
| TTC1       | -0.055 | 5.209E-01 | 9.646E-01 |
| KNCN       | -0.055 | NA        | 8.778E-01 |
| LXN        | -0.055 | 8.544E-01 | 9.095E-01 |
| PRPF4      | -0.055 | 6.252E-01 | 8.645E-01 |
| TEX35      | -0.055 | 9.208E-01 | 9.045E-01 |
| SLC34A3    | -0.055 | 8.880E-01 | 9.121E-01 |
| NUP160     | -0.055 | 6.393E-01 | 8.754E-01 |
| DPYD       | -0.055 | 8.785E-01 | 9.027E-01 |
| NAA30      | -0.055 | 5.470E-01 | 8.915E-01 |
| MLXIP      | -0.055 | 6.880E-01 | 9.504E-01 |
| COL23A1    | -0.055 | 8.591E-01 | 8.811E-01 |
| RBM34      | -0.056 | 5.515E-01 | 8.897E-01 |
| KRTAP10-11 | -0.056 | NA        | 8.851E-01 |
| OR4D6      | -0.056 | NA        | 9.335E-01 |
| RABEP1     | -0.056 | 5.551E-01 | 8.999E-01 |
| YTHDC1     | -0.056 | 4.244E-01 | 9.542E-01 |
| ZNF446     | -0.056 | 6.829E-01 | 9.863E-01 |
| RHOG       | -0.056 | 7.035E-01 | 9.279E-01 |
| TPK1       | -0.056 | 8.030E-01 | 9.079E-01 |
| PCGF1      | -0.056 | 5.583E-01 | 9.279E-01 |
| GHDC       | -0.056 | 6.425E-01 | 9.614E-01 |
| MTERF3     | -0.056 | 5.859E-01 | 9.114E-01 |
| LRIG3      | -0.056 | 8.469E-01 | 8.495E-01 |
| ZFP14      | -0.056 | 7.398E-01 | 9.075E-01 |
| TMEM128    | -0.056 | 5.519E-01 | 8.521E-01 |
| RAD50      | -0.056 | 5.926E-01 | 9.523E-01 |
| ABCB4      | -0.056 | 8.192E-01 | 9.687E-01 |
| DSE        | -0.056 | 8.537E-01 | 8.987E-01 |
| UGDH       | -0.056 | 7.770E-01 | 9.494E-01 |
| XPO7       | -0.056 | 6.017E-01 | 9.160E-01 |
| BBIP1      | -0.056 | 5.686E-01 | 9.169E-01 |
| DMXL1      | -0.056 | 6.456E-01 | 8.777E-01 |
| LRRC40     | -0.056 | 5.948E-01 | 8.646E-01 |
| SPDYE2     | -0.056 | 8.477E-01 | 9.399E-01 |
| L3HYPDH    | -0.056 | 7.408E-01 | 8.841E-01 |
| AC135586.2 | -0.056 | 8.876E-01 | 9.976E-01 |
| PRR5L      | -0.056 | 8.628E-01 | 9.976E-01 |
| MDK        | -0.056 | 8.351E-01 | 9.976E-01 |
| ZFAT       | -0.056 | 6.287E-01 | 9.976E-01 |
| ZRANB3     | -0.056 | 6.311E-01 | 9.976E-01 |
| OTULIN     | -0.056 | 6.751E-01 | 9.976E-01 |
| STX7       | -0.056 | 5.675E-01 | 9.976E-01 |
| PARL       | -0.056 | 5.373E-01 | 9.976E-01 |
| WDR35      | -0.056 | 6.604E-01 | 9.976E-01 |
| DNAJB14    | -0.056 | 5.559E-01 | 9.976E-01 |
| CCNC       | -0.056 | 5.852E-01 | 9.976E-01 |

|            |        |           |           |
|------------|--------|-----------|-----------|
| TAS2R50    | -0.056 | 9.229E-01 | 9.976E-01 |
| LRRC27     | -0.056 | 7.185E-01 | 9.976E-01 |
| C8orf89    | -0.056 | 9.004E-01 | 9.369E-01 |
| ASTE1      | -0.056 | 5.146E-01 | 9.870E-01 |
| DTWD2      | -0.056 | 7.325E-01 | 9.759E-01 |
| C11orf88   | -0.056 | 8.908E-01 | 8.804E-01 |
| CDH20      | -0.056 | 8.932E-01 | 9.049E-01 |
| ABHD13     | -0.056 | 5.026E-01 | 9.163E-01 |
| ZNF395     | -0.056 | 7.120E-01 | 9.055E-01 |
| XRCC2      | -0.056 | 7.612E-01 | 9.653E-01 |
| LINS1      | -0.056 | 5.586E-01 | 8.961E-01 |
| TFDP2      | -0.056 | 6.417E-01 | 8.575E-01 |
| GMEB2      | -0.056 | 4.769E-01 | 8.591E-01 |
| RBM33      | -0.056 | 4.924E-01 | 9.431E-01 |
| NFKBIZ     | -0.056 | 8.189E-01 | 8.829E-01 |
| LYPLAL1    | -0.056 | 6.374E-01 | 9.334E-01 |
| GAPDHS     | -0.056 | 9.158E-01 | 9.185E-01 |
| EDC3       | -0.057 | 5.012E-01 | 8.880E-01 |
| NLGN3      | -0.057 | 8.513E-01 | 8.803E-01 |
| KRTAP5-6   | -0.057 | 9.314E-01 | 8.386E-01 |
| AC105052.1 | -0.057 | NA        | 8.782E-01 |
| C17orf49   | -0.057 | 6.544E-01 | 8.460E-01 |
| ZC3H7A     | -0.057 | 5.109E-01 | 8.153E-01 |
| NPPC       | -0.057 | 9.218E-01 | 9.408E-01 |
| FDX2       | -0.057 | 7.378E-01 | 8.926E-01 |
| BCL2L13    | -0.057 | 5.126E-01 | 8.603E-01 |
| NSUN3      | -0.057 | 6.198E-01 | 8.622E-01 |
| ELOVL6     | -0.057 | 8.156E-01 | 9.404E-01 |
| ZNF445     | -0.057 | 5.832E-01 | 9.029E-01 |
| SKP2       | -0.057 | 7.679E-01 | 9.180E-01 |
| PLVAP      | -0.057 | 7.868E-01 | 8.695E-01 |
| CEP128     | -0.057 | 7.085E-01 | 9.272E-01 |
| TERF1      | -0.057 | 5.338E-01 | 9.033E-01 |
| SZT2       | -0.057 | 6.085E-01 | 9.642E-01 |
| PCOTH      | -0.057 | 8.541E-01 | 8.769E-01 |
| ZNF785     | -0.057 | 6.890E-01 | 8.407E-01 |
| FCHO2      | -0.057 | 6.209E-01 | 8.619E-01 |
| TNFRSF4    | -0.057 | 8.490E-01 | 8.598E-01 |
| FAM135A    | -0.057 | 7.353E-01 | 8.740E-01 |
| CPQ        | -0.057 | 8.192E-01 | 8.925E-01 |
| APOPT1     | -0.057 | 6.730E-01 | 9.378E-01 |
| NUP188     | -0.057 | 6.593E-01 | 8.748E-01 |
| NFX1       | -0.057 | 5.635E-01 | 9.121E-01 |
| CHML       | -0.057 | 7.722E-01 | 9.204E-01 |
| SRRM2      | -0.057 | 5.733E-01 | 9.043E-01 |
| B4GALT2    | -0.057 | 6.572E-01 | 8.880E-01 |
| SDF2L1     | -0.057 | 7.699E-01 | 9.600E-01 |
| MIR6090    | -0.057 | NA        | 9.065E-01 |
| OR4D5      | -0.057 | NA        | 8.793E-01 |
| NKX1-1     | -0.057 | NA        | 9.043E-01 |

|            |        |           |           |
|------------|--------|-----------|-----------|
| POM121L12  | -0.057 | NA        | 9.919E-01 |
| PRM3       | -0.057 | NA        | 9.681E-01 |
| PRAMEF9    | -0.057 | NA        | 8.924E-01 |
| MIR3166    | -0.057 | NA        | 8.724E-01 |
| KRTAP10-7  | -0.057 | NA        | 9.838E-01 |
| OR2AJ1     | -0.057 | NA        | 9.591E-01 |
| OR10K1     | -0.057 | NA        | 9.775E-01 |
| MIR548AG2  | -0.057 | NA        | 8.611E-01 |
| SPANXN2    | -0.057 | NA        | 9.101E-01 |
| RPL22      | -0.057 | 5.759E-01 | 8.978E-01 |
| HOXD11     | -0.057 | 9.139E-01 | 9.606E-01 |
| CA5A       | -0.057 | 8.896E-01 | 9.333E-01 |
| FAM153C    | -0.057 | 9.246E-01 | 9.422E-01 |
| IFIT1      | -0.057 | 8.901E-01 | 9.181E-01 |
| ATP5J      | -0.057 | 5.227E-01 | 8.715E-01 |
| PCNX1      | -0.057 | 6.377E-01 | 9.395E-01 |
| ZFAND4     | -0.057 | 7.024E-01 | 8.827E-01 |
| PACS2      | -0.057 | 5.675E-01 | 9.475E-01 |
| ARPC4-TTLL | -0.057 | 7.949E-01 | 9.347E-01 |
| ACBD4      | -0.057 | 7.739E-01 | 8.494E-01 |
| HPRT1      | -0.057 | 7.063E-01 | 8.594E-01 |
| SLC35B4    | -0.057 | 6.209E-01 | 8.965E-01 |
| NCKAP5L    | -0.058 | 6.594E-01 | 9.326E-01 |
| ARHGEF39   | -0.058 | 7.509E-01 | 8.264E-01 |
| IFT57      | -0.058 | 6.748E-01 | 8.873E-01 |
| CCNE1      | -0.058 | 8.245E-01 | 8.798E-01 |
| CRIP1      | -0.058 | 8.504E-01 | 8.738E-01 |
| ACE2       | -0.058 | 9.038E-01 | 8.788E-01 |
| TMEM88     | -0.058 | 8.174E-01 | 9.965E-01 |
| TMX3       | -0.058 | 5.310E-01 | 9.954E-01 |
| LY86       | -0.058 | 8.759E-01 | 9.952E-01 |
| ZNF628     | -0.058 | 5.682E-01 | 8.894E-01 |
| IK         | -0.058 | 3.406E-01 | 9.758E-01 |
| ATPIF1     | -0.058 | 6.148E-01 | 8.237E-01 |
| DYNC2H1    | -0.058 | 7.984E-01 | 9.667E-01 |
| AKAP1      | -0.058 | 6.543E-01 | 9.099E-01 |
| CPNE1      | -0.058 | 7.017E-01 | 9.840E-01 |
| DRG2       | -0.058 | 5.177E-01 | 9.544E-01 |
| ZNF562     | -0.058 | 6.387E-01 | 9.602E-01 |
| RRP15      | -0.058 | 5.598E-01 | 8.833E-01 |
| ZFYVE21    | -0.058 | 5.552E-01 | 9.332E-01 |
| C20orf173  | -0.058 | 9.380E-01 | 8.920E-01 |
| BCCIP      | -0.058 | 5.307E-01 | 8.443E-01 |
| NAALAD2    | -0.058 | 8.070E-01 | 8.841E-01 |
| PHF8       | -0.058 | 6.686E-01 | 9.169E-01 |
| USP38      | -0.058 | 5.621E-01 | 8.721E-01 |
| KDM2B      | -0.058 | 4.935E-01 | 8.540E-01 |
| R3HCC1     | -0.058 | 6.272E-01 | 9.782E-01 |
| GTPBP3     | -0.058 | 5.732E-01 | 8.505E-01 |
| STOX2      | -0.058 | 8.208E-01 | 9.505E-01 |

|            |        |           |           |
|------------|--------|-----------|-----------|
| KCNE1      | -0.058 | 8.781E-01 | 8.224E-01 |
| ZDHHC7     | -0.058 | 6.043E-01 | 8.409E-01 |
| CLDN11     | -0.058 | 8.918E-01 | 9.500E-01 |
| RBX1       | -0.058 | 5.675E-01 | 9.182E-01 |
| NAIF1      | -0.058 | 4.641E-01 | 9.515E-01 |
| MIR5580    | -0.058 | NA        | 8.527E-01 |
| DNA2       | -0.058 | 7.077E-01 | 9.926E-01 |
| ATP2A2     | -0.058 | 6.563E-01 | 9.383E-01 |
| SF1        | -0.058 | 2.444E-01 | 8.508E-01 |
| SLC35C2    | -0.058 | 5.141E-01 | 9.836E-01 |
| OGFOD2     | -0.058 | 5.177E-01 | 8.853E-01 |
| MED17      | -0.058 | 5.331E-01 | 8.618E-01 |
| PRDX2      | -0.058 | 6.702E-01 | 9.201E-01 |
| FAM76B     | -0.058 | 5.902E-01 | 8.517E-01 |
| SNRNP25    | -0.058 | 6.640E-01 | 8.634E-01 |
| RBM4B      | -0.058 | 5.195E-01 | 9.053E-01 |
| HOXC8      | -0.058 | 9.096E-01 | 8.832E-01 |
| ERCC1      | -0.059 | 6.017E-01 | 9.459E-01 |
| TVP23C     | -0.059 | 6.842E-01 | 8.854E-01 |
| KLHDC2     | -0.059 | 5.732E-01 | 8.961E-01 |
| CENPJ      | -0.059 | 6.481E-01 | 9.577E-01 |
| AGPAT3     | -0.059 | 5.942E-01 | 8.611E-01 |
| PPIA       | -0.059 | 5.316E-01 | 8.972E-01 |
| AC073896.1 | -0.059 | 8.897E-01 | 9.475E-01 |
| ATP2B2     | -0.059 | 8.775E-01 | 9.530E-01 |
| FRA10AC1   | -0.059 | 5.508E-01 | 8.174E-01 |
| MIR4505    | -0.059 | NA        | 9.277E-01 |
| TMEM59L    | -0.059 | 8.933E-01 | 9.577E-01 |
| FHDC1      | -0.059 | 8.283E-01 | 8.134E-01 |
| RERE       | -0.059 | 6.554E-01 | 8.643E-01 |
| CLP1       | -0.059 | 5.661E-01 | 9.204E-01 |
| CIB1       | -0.059 | 7.148E-01 | 8.724E-01 |
| PS10-NUDT  | -0.059 | 8.801E-01 | 9.037E-01 |
| RANGRF     | -0.059 | 7.454E-01 | 8.384E-01 |
| LILRA6     | -0.059 | 8.822E-01 | 9.454E-01 |
| CPA3       | -0.059 | 8.921E-01 | 9.522E-01 |
| TIMM8B     | -0.059 | 6.626E-01 | 8.069E-01 |
| PNPLA4     | -0.059 | 7.122E-01 | 9.684E-01 |
| MIR4258    | -0.059 | 8.391E-01 | 8.467E-01 |
| IPMK       | -0.059 | 6.972E-01 | 8.566E-01 |
| ABI2       | -0.059 | 5.329E-01 | 9.415E-01 |
| PSPN       | -0.059 | 6.579E-01 | 9.029E-01 |
| SNRPB      | -0.059 | 6.374E-01 | 8.271E-01 |
| SLC9A1     | -0.059 | 7.229E-01 | 8.325E-01 |
| RGCC       | -0.059 | 7.847E-01 | 8.385E-01 |
| KLHL26     | -0.059 | 5.680E-01 | 8.453E-01 |
| DDN        | -0.059 | 8.858E-01 | 9.398E-01 |
| WDR91      | -0.059 | 7.551E-01 | 8.064E-01 |
| TRPC4AP    | -0.059 | 3.867E-01 | 9.492E-01 |
| SAXO2      | -0.059 | 8.007E-01 | 8.142E-01 |

|            |        |           |           |
|------------|--------|-----------|-----------|
| PDCL       | -0.059 | 5.133E-01 | 9.337E-01 |
| MAN2B2     | -0.059 | 6.254E-01 | 8.845E-01 |
| CCR1       | -0.059 | 8.638E-01 | 7.686E-01 |
| NCBP2      | -0.059 | 4.840E-01 | 8.852E-01 |
| FCHO1      | -0.059 | 8.368E-01 | 8.758E-01 |
| SYNRG      | -0.059 | 5.542E-01 | 9.073E-01 |
| ATG5       | -0.059 | 5.888E-01 | 8.560E-01 |
| DLD        | -0.059 | 5.673E-01 | 8.310E-01 |
| IAPP       | -0.059 | 9.503E-01 | 8.306E-01 |
| LEKR1      | -0.059 | 7.643E-01 | 9.030E-01 |
| PALD1      | -0.059 | 8.088E-01 | 8.426E-01 |
| PHAX       | -0.059 | 4.530E-01 | 8.373E-01 |
| FOPNL      | -0.059 | 5.924E-01 | 8.509E-01 |
| MX1        | -0.059 | 8.549E-01 | 9.165E-01 |
| 1SH5-SAPCD | -0.059 | 7.998E-01 | 8.256E-01 |
| C9orf131   | -0.059 | 8.931E-01 | 8.685E-01 |
| CHCHD6     | -0.059 | 6.329E-01 | 8.655E-01 |
| TSGA10     | -0.059 | 7.451E-01 | 8.355E-01 |
| GPR161     | -0.060 | 8.107E-01 | 8.818E-01 |
| C6orf62    | -0.060 | 5.767E-01 | 8.273E-01 |
| MIS12      | -0.060 | 5.790E-01 | 9.263E-01 |
| TLE4       | -0.060 | 7.921E-01 | 9.303E-01 |
| SETD9      | -0.060 | 6.612E-01 | 8.933E-01 |
| MIR6835    | -0.060 | 8.590E-01 | 9.780E-01 |
| PEX26      | -0.060 | 4.500E-01 | 8.618E-01 |
| SDAD1      | -0.060 | 6.050E-01 | 8.424E-01 |
| QKI        | -0.060 | 6.593E-01 | 8.614E-01 |
| PLA2G2D    | -0.060 | 9.283E-01 | 9.839E-01 |
| ADAMTSL5   | -0.060 | 8.466E-01 | 8.217E-01 |
| CTXN2      | -0.060 | NA        | 9.114E-01 |
| KCNA2      | -0.060 | 9.128E-01 | 7.644E-01 |
| C9orf153   | -0.060 | 8.668E-01 | 8.361E-01 |
| COL4A6     | -0.060 | 8.841E-01 | 9.706E-01 |
| KHNYN      | -0.060 | 5.753E-01 | 8.250E-01 |
| NCLN       | -0.060 | 6.144E-01 | 7.672E-01 |
| RPA4       | -0.060 | 8.529E-01 | 8.376E-01 |
| GMPR2      | -0.060 | 4.561E-01 | 8.429E-01 |
| CARD8      | -0.060 | 5.970E-01 | 8.029E-01 |
| COX16      | -0.060 | 4.568E-01 | 9.020E-01 |
| TMEM67     | -0.060 | 6.816E-01 | 9.332E-01 |
| AC093899.2 | -0.060 | NA        | 7.993E-01 |
| OR6K2      | -0.060 | NA        | 8.067E-01 |
| OR5K1      | -0.060 | NA        | 7.689E-01 |
| CCL27      | -0.060 | NA        | 7.859E-01 |
| OR1E2      | -0.060 | NA        | 8.451E-01 |
| RBMY1J     | -0.060 | NA        | 9.717E-01 |
| MIR4674    | -0.060 | NA        | 8.057E-01 |
| PRAMEF11   | -0.060 | NA        | 8.081E-01 |
| OR6B1      | -0.060 | NA        | 8.089E-01 |
| CLCNKA     | -0.060 | 8.882E-01 | 9.371E-01 |

|             |        |           |           |
|-------------|--------|-----------|-----------|
| PBX2        | -0.060 | 5.402E-01 | 9.290E-01 |
| HPS5        | -0.060 | 6.534E-01 | 9.776E-01 |
| ARPC2       | -0.060 | 5.771E-01 | 8.865E-01 |
| PWP1        | -0.060 | 4.645E-01 | 9.357E-01 |
| FKBP2       | -0.060 | 7.134E-01 | 7.953E-01 |
| ENO4        | -0.060 | 8.217E-01 | 8.301E-01 |
| CHST6       | -0.060 | 8.833E-01 | 9.026E-01 |
| CD84        | -0.060 | 8.755E-01 | 8.158E-01 |
| AGGF1       | -0.060 | 4.207E-01 | 7.880E-01 |
| ASNSD1      | -0.060 | 3.864E-01 | 9.654E-01 |
| CUZD1       | -0.060 | 8.383E-01 | 9.965E-01 |
| HELLS       | -0.060 | 6.898E-01 | 9.957E-01 |
| TOP1        | -0.060 | 5.316E-01 | 9.948E-01 |
| TNNI1       | -0.060 | 8.248E-01 | 8.221E-01 |
| AP4E1       | -0.060 | 5.533E-01 | 8.544E-01 |
| ZNF827      | -0.060 | 6.949E-01 | 8.219E-01 |
| PCCA        | -0.060 | 7.051E-01 | 7.696E-01 |
| ZZZ3        | -0.060 | 5.455E-01 | 8.424E-01 |
| GCM2        | -0.060 | NA        | 9.590E-01 |
| UC02210-CRF | -0.060 | NA        | 8.968E-01 |
| BRF1        | -0.060 | 5.434E-01 | 9.282E-01 |
| AP002495.1  | -0.060 | 8.791E-01 | 9.341E-01 |
| CTU2        | -0.060 | 5.970E-01 | 7.628E-01 |
| SUCLG2      | -0.060 | 6.309E-01 | 8.530E-01 |
| TMEM40      | -0.060 | 8.570E-01 | 8.357E-01 |
| STK33       | -0.060 | 8.927E-01 | 9.151E-01 |
| FAM172A     | -0.060 | 5.987E-01 | 8.283E-01 |
| MEX3C       | -0.060 | 5.985E-01 | 8.157E-01 |
| C19orf84    | -0.060 | 8.936E-01 | 9.337E-01 |
| AC010422.6  | -0.060 | 6.910E-01 | 9.026E-01 |
| RC3H2       | -0.060 | 6.058E-01 | 9.256E-01 |
| AK9         | -0.060 | 7.389E-01 | 7.491E-01 |
| GABRR2      | -0.060 | 8.500E-01 | 8.691E-01 |
| DEXI        | -0.060 | 6.073E-01 | 8.590E-01 |
| GSTT2B      | -0.061 | 8.533E-01 | 8.181E-01 |
| PRR36       | -0.061 | 8.966E-01 | 8.192E-01 |
| KIF5C       | -0.061 | 8.826E-01 | 8.595E-01 |
| 43897.000   | -0.061 | 4.735E-01 | 9.916E-01 |
| AC011498.1  | -0.061 | 5.731E-01 | 8.178E-01 |
| ADO         | -0.061 | 4.808E-01 | 9.196E-01 |
| ANAPC15     | -0.061 | 5.680E-01 | 8.654E-01 |
| SERTAD1     | -0.061 | 7.049E-01 | 9.376E-01 |
| C5orf34     | -0.061 | 7.162E-01 | 8.606E-01 |
| CASD1       | -0.061 | 6.293E-01 | 9.618E-01 |
| RCC2        | -0.061 | 5.013E-01 | 9.776E-01 |
| ZNF891      | -0.061 | 6.922E-01 | 7.516E-01 |
| CCDC124     | -0.061 | 5.696E-01 | 9.195E-01 |
| CCDC137     | -0.061 | 5.719E-01 | 7.567E-01 |
| CCDC138     | -0.061 | 7.044E-01 | 8.376E-01 |
| IPO7        | -0.061 | 6.395E-01 | 7.543E-01 |



|           |        |           |           |
|-----------|--------|-----------|-----------|
| CCDC77    | -0.061 | 6.399E-01 | 9.310E-01 |
| DPCD      | -0.061 | 6.841E-01 | 8.217E-01 |
| ZNF75D    | -0.061 | 5.879E-01 | 8.425E-01 |
| MIR7156   | -0.061 | NA        | 8.146E-01 |
| MAGEB5    | -0.061 | NA        | 8.112E-01 |
| XRCC6     | -0.061 | 4.582E-01 | 8.376E-01 |
| ELP6      | -0.061 | 5.310E-01 | 8.401E-01 |
| MICALL1   | -0.061 | 7.125E-01 | 8.360E-01 |
| RBM10     | -0.061 | 5.596E-01 | 7.438E-01 |
| TMEM164   | -0.061 | 6.638E-01 | 7.911E-01 |
| FBXO7     | -0.061 | 4.380E-01 | 8.208E-01 |
| PI4KA     | -0.061 | 6.410E-01 | 9.254E-01 |
| DNMT1     | -0.061 | 6.807E-01 | 9.338E-01 |
| SMAP1     | -0.061 | 5.508E-01 | 7.679E-01 |
| RRM1      | -0.061 | 6.958E-01 | 8.865E-01 |
| RAB8A     | -0.061 | 3.096E-01 | 8.136E-01 |
| LRMDA     | -0.061 | 7.994E-01 | 7.953E-01 |
| ZNHIT1    | -0.061 | 6.514E-01 | 8.513E-01 |
| KCNJ3     | -0.061 | 9.237E-01 | 8.749E-01 |
| CDY2B     | -0.061 | NA        | 8.242E-01 |
| DEFB114   | -0.061 | NA        | 9.309E-01 |
| KRTAP13-4 | -0.061 | NA        | 7.643E-01 |
| MIR153-2  | -0.061 | NA        | 8.292E-01 |
| MIR3943   | -0.061 | NA        | 8.188E-01 |
| MIR4268   | -0.061 | NA        | 7.669E-01 |
| MIR4476   | -0.061 | NA        | 7.568E-01 |
| MIR4498   | -0.061 | NA        | 8.564E-01 |
| MIR4666B  | -0.061 | NA        | 7.613E-01 |
| MIR501    | -0.061 | NA        | 7.874E-01 |
| MIR509-2  | -0.061 | NA        | 7.717E-01 |
| MIR548AW  | -0.061 | NA        | 7.415E-01 |
| MIR592    | -0.061 | NA        | 9.053E-01 |
| OR4F17    | -0.061 | NA        | 7.224E-01 |
| OR8B4     | -0.061 | NA        | 9.323E-01 |
| OR8U1     | -0.061 | NA        | 9.358E-01 |
| SPATA31A5 | -0.061 | NA        | 9.001E-01 |
| DEFB107B  | -0.061 | NA        | 8.299E-01 |
| MIR1185-1 | -0.061 | NA        | 7.705E-01 |
| MIR124-3  | -0.061 | NA        | 7.641E-01 |
| MIR1468   | -0.061 | NA        | 8.417E-01 |
| MIR184    | -0.061 | NA        | 9.215E-01 |
| MIR188    | -0.061 | NA        | 8.438E-01 |
| MIR3180-4 | -0.061 | NA        | 8.093E-01 |
| MIR378F   | -0.061 | NA        | 7.985E-01 |
| MIR3920   | -0.061 | NA        | 7.997E-01 |
| MIR4307   | -0.061 | NA        | 9.568E-01 |
| MIR4475   | -0.061 | NA        | 8.915E-01 |
| MIR4794   | -0.061 | NA        | 9.164E-01 |
| MIR487A   | -0.061 | NA        | 8.316E-01 |
| MIR521-1  | -0.061 | NA        | 8.722E-01 |

|            |        |           |           |
|------------|--------|-----------|-----------|
| MIR548A1   | -0.061 | NA        | 8.119E-01 |
| MIR548AE1  | -0.061 | NA        | 9.053E-01 |
| MIR548G    | -0.061 | NA        | 7.688E-01 |
| MIR5689    | -0.061 | NA        | 8.315E-01 |
| MIR6131    | -0.061 | NA        | 9.029E-01 |
| MIR6788    | -0.061 | NA        | 8.827E-01 |
| MIR759     | -0.061 | NA        | 9.458E-01 |
| MIR8062    | -0.061 | NA        | 7.748E-01 |
| MIR8485    | -0.061 | NA        | 9.910E-01 |
| OR4C13     | -0.061 | NA        | 9.837E-01 |
| OR5D16     | -0.061 | NA        | 9.546E-01 |
| OR5H1      | -0.061 | NA        | 6.674E-01 |
| PRY2       | -0.061 | NA        | 9.392E-01 |
| AC026786.1 | -0.061 | NA        | 8.291E-01 |
| AP000322.1 | -0.061 | NA        | 8.417E-01 |
| MIR3142    | -0.061 | NA        | 7.486E-01 |
| MIR4281    | -0.061 | NA        | 8.000E-01 |
| MIR4699    | -0.061 | NA        | 9.175E-01 |
| MIR495     | -0.061 | NA        | 8.101E-01 |
| MIR8057    | -0.061 | NA        | 8.717E-01 |
| OR10G4     | -0.061 | NA        | 9.175E-01 |
| OR1A1      | -0.061 | NA        | 7.682E-01 |
| TRIM64     | -0.061 | NA        | 7.882E-01 |
| ECI1       | -0.061 | 6.893E-01 | 8.422E-01 |
| CHST5      | -0.061 | 8.760E-01 | 8.189E-01 |
| MGAT2      | -0.061 | 7.021E-01 | 7.627E-01 |
| MIR3138    | -0.061 | 8.847E-01 | 7.575E-01 |
| PLA2G12A   | -0.061 | 5.762E-01 | 8.973E-01 |
| GLUD1      | -0.061 | 5.530E-01 | 8.460E-01 |
| ZKSCAN2    | -0.061 | 6.516E-01 | 8.264E-01 |
| ACTR5      | -0.061 | 5.733E-01 | 9.833E-01 |
| KEAP1      | -0.061 | 5.175E-01 | 8.015E-01 |
| KIF7       | -0.061 | 7.539E-01 | 7.390E-01 |
| DNAJC18    | -0.062 | 6.846E-01 | 8.696E-01 |
| YY1        | -0.062 | 3.361E-01 | 9.610E-01 |
| CISD2      | -0.062 | 5.165E-01 | 7.724E-01 |
| ZNF689     | -0.062 | 5.410E-01 | 7.612E-01 |
| ZNF287     | -0.062 | 7.251E-01 | 8.786E-01 |
| C5AR1      | -0.062 | 8.505E-01 | 9.957E-01 |
| NHEJ1      | -0.062 | 6.708E-01 | 9.957E-01 |
| MIR6858    | -0.062 | NA        | 9.957E-01 |
| PTK6       | -0.062 | 8.463E-01 | 9.957E-01 |
| SLC35A4    | -0.062 | 4.043E-01 | 9.957E-01 |
| TTC30B     | -0.062 | 6.321E-01 | 9.954E-01 |
| TCIRG1     | -0.062 | 7.539E-01 | 9.954E-01 |
| TNRC6C     | -0.062 | 7.049E-01 | 9.954E-01 |
| CPT2       | -0.062 | 5.307E-01 | 9.954E-01 |
| BSN        | -0.062 | 8.401E-01 | 9.954E-01 |
| PARP4      | -0.062 | 6.672E-01 | 9.954E-01 |
| FNDC3A     | -0.062 | 6.841E-01 | 9.345E-01 |

|           |        |           |           |
|-----------|--------|-----------|-----------|
| AKT1      | -0.062 | 4.020E-01 | 8.369E-01 |
| ACVRL1    | -0.062 | 7.705E-01 | 7.613E-01 |
| L3MBTL1   | -0.062 | 8.090E-01 | 8.134E-01 |
| CHD1L     | -0.062 | 5.766E-01 | 9.276E-01 |
| EIF4E2    | -0.062 | 5.382E-01 | 7.938E-01 |
| C7orf26   | -0.062 | 4.973E-01 | 8.077E-01 |
| PURA      | -0.062 | 5.007E-01 | 8.192E-01 |
| HSD11B1   | -0.062 | 8.664E-01 | 9.696E-01 |
| EHHADH    | -0.062 | 7.313E-01 | 9.352E-01 |
| CCL13     | -0.062 | 8.999E-01 | 8.605E-01 |
| TNPO2     | -0.062 | 4.588E-01 | 7.994E-01 |
| RBCK1     | -0.062 | 5.636E-01 | 8.170E-01 |
| VTI1B     | -0.062 | 4.024E-01 | 8.545E-01 |
| WIZ       | -0.062 | 4.148E-01 | 7.177E-01 |
| EIF2S1    | -0.062 | 5.752E-01 | 8.118E-01 |
| TMEM192   | -0.062 | 5.812E-01 | 8.305E-01 |
| FAM69B    | -0.063 | 8.369E-01 | 7.973E-01 |
| ZFX       | -0.063 | 5.651E-01 | 8.511E-01 |
| MAIP1     | -0.063 | 4.762E-01 | 9.023E-01 |
| HPS1      | -0.063 | 5.516E-01 | 8.048E-01 |
| LIPT2     | -0.063 | 6.902E-01 | 7.575E-01 |
| MIR4305   | -0.063 | NA        | 8.353E-01 |
| FAM231B   | -0.063 | NA        | 7.682E-01 |
| TAS2R39   | -0.063 | NA        | 7.721E-01 |
| OR10S1    | -0.063 | NA        | 8.024E-01 |
| MRPL2     | -0.063 | 5.920E-01 | 8.933E-01 |
| NUMB      | -0.063 | 4.475E-01 | 7.592E-01 |
| IFRD2     | -0.063 | 5.943E-01 | 7.646E-01 |
| 44083.000 | -0.063 | 5.882E-01 | 7.778E-01 |
| SLC16A7   | -0.063 | 8.407E-01 | 7.286E-01 |
| ZNF408    | -0.063 | 5.596E-01 | 9.348E-01 |
| ETF1      | -0.063 | 4.913E-01 | 9.390E-01 |
| ABCC10    | -0.063 | 5.293E-01 | 7.952E-01 |
| SLC9A7    | -0.063 | 7.917E-01 | 8.128E-01 |
| RASGRP2   | -0.063 | 8.607E-01 | 7.386E-01 |
| TOE1      | -0.063 | 5.434E-01 | 8.897E-01 |
| GYS1      | -0.063 | 5.436E-01 | 7.852E-01 |
| DDX18     | -0.063 | 4.531E-01 | 8.167E-01 |
| UVSSA     | -0.063 | 7.311E-01 | 8.724E-01 |
| IRF3      | -0.063 | 5.891E-01 | 9.753E-01 |
| RFX2      | -0.063 | 7.007E-01 | 8.703E-01 |
| ZNF517    | -0.063 | 6.593E-01 | 8.145E-01 |
| C6orf48   | -0.063 | 6.647E-01 | 6.646E-01 |
| KRAS      | -0.063 | 6.057E-01 | 8.275E-01 |
| AIMP1     | -0.063 | 2.828E-01 | 7.852E-01 |
| TKT       | -0.063 | 7.205E-01 | 7.867E-01 |
| MIR191    | -0.063 | NA        | 8.190E-01 |
| KNSTRN    | -0.063 | 6.662E-01 | 7.891E-01 |
| AFF4      | -0.063 | 5.729E-01 | 9.190E-01 |
| CORT      | -0.063 | 7.909E-01 | 8.101E-01 |

|            |        |           |           |
|------------|--------|-----------|-----------|
| GPR3       | -0.063 | 7.943E-01 | 8.232E-01 |
| CHID1      | -0.063 | 5.622E-01 | 6.834E-01 |
| NUP98      | -0.063 | 4.490E-01 | 8.893E-01 |
| AC133555.5 | -0.063 | 7.060E-01 | 9.854E-01 |
| ARSA       | -0.063 | 6.893E-01 | 9.023E-01 |
| SFXN1      | -0.063 | 5.381E-01 | 8.698E-01 |
| SCAMP1     | -0.063 | 5.896E-01 | 8.696E-01 |
| LEMD1      | -0.063 | 9.167E-01 | 7.496E-01 |
| PXT1       | -0.063 | 8.354E-01 | 7.506E-01 |
| RANBP1     | -0.063 | 6.374E-01 | 8.086E-01 |
| NFYA       | -0.063 | 5.749E-01 | 7.795E-01 |
| GAL3ST4    | -0.063 | 8.000E-01 | 7.111E-01 |
| ZNF629     | -0.063 | 5.552E-01 | 7.534E-01 |
| TFPI       | -0.063 | 8.369E-01 | 7.549E-01 |
| ADCY5      | -0.063 | 8.880E-01 | 7.396E-01 |
| SGPP1      | -0.063 | 8.055E-01 | 9.373E-01 |
| CSNK1D     | -0.063 | 3.456E-01 | 8.696E-01 |
| RARS       | -0.063 | 3.947E-01 | 8.883E-01 |
| FASTKD3    | -0.063 | 5.749E-01 | 9.146E-01 |
| MGRN1      | -0.063 | 4.631E-01 | 7.325E-01 |
| TMEM19     | -0.063 | 6.657E-01 | 9.263E-01 |
| MAML1      | -0.063 | 4.638E-01 | 9.315E-01 |
| TMEM176B   | -0.064 | 8.496E-01 | 8.065E-01 |
| UPF3A      | -0.064 | 5.209E-01 | 7.801E-01 |
| HSF1       | -0.064 | 4.945E-01 | 7.579E-01 |
| SF19-TCTEX | -0.064 | 8.868E-01 | 7.486E-01 |
| OTUB1      | -0.064 | 4.931E-01 | 8.269E-01 |
| MINDY3     | -0.064 | 5.281E-01 | 9.503E-01 |
| AC008403.1 | -0.064 | NA        | 7.243E-01 |
| NPIP3      | -0.064 | 7.904E-01 | 7.956E-01 |
| WDCP       | -0.064 | 5.316E-01 | 7.739E-01 |
| CCNF       | -0.064 | 6.481E-01 | 9.578E-01 |
| SLU7       | -0.064 | 3.958E-01 | 7.888E-01 |
| ST7L       | -0.064 | 4.820E-01 | 9.145E-01 |
| ZNF512     | -0.064 | 6.311E-01 | 7.506E-01 |
| NAPG       | -0.064 | 4.836E-01 | 7.951E-01 |
| MRPL14     | -0.064 | 6.572E-01 | 7.859E-01 |
| ABHD3      | -0.064 | 6.544E-01 | 8.467E-01 |
| ATP5E      | -0.064 | 6.036E-01 | 8.766E-01 |
| IRF2       | -0.064 | 5.155E-01 | 9.591E-01 |
| MFSD2B     | -0.064 | 7.598E-01 | 9.896E-01 |
| POLR3B     | -0.064 | 5.522E-01 | 9.896E-01 |
| MIR5684    | -0.064 | NA        | 9.900E-01 |
| CASP8AP2   | -0.064 | 6.514E-01 | 9.901E-01 |
| DPH1       | -0.064 | 5.271E-01 | 9.901E-01 |
| C7orf25    | -0.064 | 5.316E-01 | 7.702E-01 |
| EIF3B      | -0.064 | 5.596E-01 | 7.837E-01 |
| OCLM       | -0.064 | 8.184E-01 | 7.736E-01 |
| TAS2R16    | -0.064 | NA        | 7.705E-01 |
| AC005258.1 | -0.064 | NA        | 7.976E-01 |

|            |        |           |           |
|------------|--------|-----------|-----------|
| CPLX3      | -0.064 | NA        | 9.371E-01 |
| DEFB103A   | -0.064 | NA        | 9.431E-01 |
| DEFB135    | -0.064 | NA        | 7.968E-01 |
| MIR129-2   | -0.064 | NA        | 7.520E-01 |
| MIR325     | -0.064 | NA        | 8.424E-01 |
| MIR377     | -0.064 | NA        | 9.753E-01 |
| MIR4670    | -0.064 | NA        | 7.927E-01 |
| MIR519E    | -0.064 | NA        | 8.153E-01 |
| MIR551B    | -0.064 | NA        | 8.899E-01 |
| MIR6765    | -0.064 | NA        | 6.770E-01 |
| MIRLET7A2  | -0.064 | NA        | 7.482E-01 |
| CDY2A      | -0.064 | NA        | 8.923E-01 |
| MIR301B    | -0.064 | NA        | 7.521E-01 |
| MIR3688-1  | -0.064 | NA        | 9.447E-01 |
| MIR4536-1  | -0.064 | NA        | 8.155E-01 |
| MIR4540    | -0.064 | NA        | 7.160E-01 |
| MIR4661    | -0.064 | NA        | 8.160E-01 |
| MIR4769    | -0.064 | NA        | 7.032E-01 |
| MIR6715A   | -0.064 | NA        | 8.570E-01 |
| MIR6729    | -0.064 | NA        | 7.035E-01 |
| OR8H1      | -0.064 | NA        | 7.344E-01 |
| PRAMEF27   | -0.064 | NA        | 7.897E-01 |
| PHF20L1    | -0.064 | 4.931E-01 | 7.152E-01 |
| NEPRO      | -0.064 | 3.661E-01 | 7.360E-01 |
| SPDYE5     | -0.064 | 7.326E-01 | 8.127E-01 |
| MIR548AC   | -0.064 | NA        | 8.565E-01 |
| YTHDF2     | -0.064 | 3.399E-01 | 7.627E-01 |
| GK         | -0.064 | 7.457E-01 | 7.605E-01 |
| ITPA       | -0.064 | 5.596E-01 | 7.472E-01 |
| ZNF384     | -0.064 | 5.680E-01 | 9.038E-01 |
| GOSR1      | -0.064 | 4.150E-01 | 6.921E-01 |
| MTR        | -0.064 | 5.225E-01 | 9.143E-01 |
| ZNF621     | -0.064 | 5.851E-01 | 9.950E-01 |
| SUSD5      | -0.064 | 8.693E-01 | 9.950E-01 |
| CORO1C     | -0.064 | 7.190E-01 | 9.950E-01 |
| AK3        | -0.064 | 6.186E-01 | 9.950E-01 |
| MIR5008    | -0.064 | NA        | 9.950E-01 |
| DDX42      | -0.064 | 2.938E-01 | 9.950E-01 |
| NUPL2      | -0.065 | 4.312E-01 | 9.950E-01 |
| RPL30      | -0.065 | 6.574E-01 | 9.950E-01 |
| DNHD1      | -0.065 | 7.508E-01 | 9.950E-01 |
| SMIM9      | -0.065 | NA        | 9.950E-01 |
| PRRC2B     | -0.065 | 6.907E-01 | 9.950E-01 |
| ZC3H3      | -0.065 | 4.490E-01 | 6.964E-01 |
| TNFAIP8L1  | -0.065 | 6.387E-01 | 8.137E-01 |
| LRRC66     | -0.065 | 8.582E-01 | 7.789E-01 |
| PNP        | -0.065 | 6.802E-01 | 7.009E-01 |
| PDE6D      | -0.065 | 4.625E-01 | 7.424E-01 |
| AGAP5      | -0.065 | 7.739E-01 | 9.145E-01 |
| CDKN2AIPNI | -0.065 | 5.568E-01 | 9.772E-01 |

|            |        |           |           |
|------------|--------|-----------|-----------|
| SERBP1     | -0.065 | 4.622E-01 | 8.299E-01 |
| CARNMT1    | -0.065 | 5.864E-01 | 7.465E-01 |
| ANAPC1     | -0.065 | 5.195E-01 | 9.784E-01 |
| WDR24      | -0.065 | 5.342E-01 | 8.499E-01 |
| MMS22L     | -0.065 | 6.664E-01 | 7.535E-01 |
| EXOSC1     | -0.065 | 4.883E-01 | 7.124E-01 |
| PRDM5      | -0.065 | 8.391E-01 | 8.790E-01 |
| ITGA2B     | -0.065 | 8.540E-01 | 7.490E-01 |
| ZFP64      | -0.065 | 5.227E-01 | 8.424E-01 |
| SPRYD4     | -0.065 | 5.056E-01 | 8.845E-01 |
| CAMTA2     | -0.065 | 5.163E-01 | 7.809E-01 |
| KANSL2     | -0.065 | 3.985E-01 | 8.096E-01 |
| CDKL1      | -0.065 | 7.489E-01 | 8.329E-01 |
| ABCG1      | -0.065 | 7.827E-01 | 6.667E-01 |
| RCC1L      | -0.065 | 3.810E-01 | 7.182E-01 |
| ATP10D     | -0.065 | 7.687E-01 | 8.954E-01 |
| STRAP      | -0.065 | 4.996E-01 | 7.025E-01 |
| CTR9       | -0.065 | 4.868E-01 | 7.287E-01 |
| ZNF16      | -0.065 | 4.858E-01 | 9.371E-01 |
| RSPH10B    | -0.065 | 8.182E-01 | 8.011E-01 |
| PKNOX2     | -0.065 | 8.806E-01 | 7.713E-01 |
| MIR5693    | -0.065 | NA        | 9.458E-01 |
| MIR326     | -0.065 | NA        | 8.861E-01 |
| MIR5093    | -0.065 | NA        | 8.524E-01 |
| KRT26      | -0.065 | NA        | 7.525E-01 |
| OR1L1      | -0.065 | NA        | 7.266E-01 |
| KRTAP9-7   | -0.065 | NA        | 8.055E-01 |
| GSG2       | -0.065 | 7.645E-01 | 8.935E-01 |
| HBS1L      | -0.066 | 5.088E-01 | 8.115E-01 |
| FAM161A    | -0.066 | 7.347E-01 | 8.352E-01 |
| MICALL2    | -0.066 | 7.054E-01 | 8.904E-01 |
| RTTN       | -0.066 | 7.271E-01 | 7.880E-01 |
| ELAVL1     | -0.066 | 2.225E-01 | 8.472E-01 |
| PDZD3      | -0.066 | 9.164E-01 | 6.825E-01 |
| SH3YL1     | -0.066 | 7.482E-01 | 9.067E-01 |
| HECTD1     | -0.066 | 5.524E-01 | 9.665E-01 |
| AP4B1      | -0.066 | 4.808E-01 | 8.037E-01 |
| ARL17A     | -0.066 | 7.084E-01 | 7.596E-01 |
| AC138696.1 | -0.066 | 8.755E-01 | 7.498E-01 |
| MGA        | -0.066 | 5.191E-01 | 8.541E-01 |
| TUBB4B     | -0.066 | 6.296E-01 | 9.837E-01 |
| TMEM69     | -0.066 | 4.490E-01 | 9.899E-01 |
| UFD1       | -0.066 | 5.134E-01 | 9.911E-01 |
| TECPR1     | -0.066 | 4.935E-01 | 7.920E-01 |
| MMADHC     | -0.066 | 4.176E-01 | 8.791E-01 |
| SETD4      | -0.066 | 5.651E-01 | 8.199E-01 |
| SIPA1      | -0.066 | 6.453E-01 | 7.898E-01 |
| COPS2      | -0.066 | 4.093E-01 | 9.344E-01 |
| NXF1       | -0.066 | 3.923E-01 | 6.988E-01 |
| ZNF691     | -0.066 | 5.778E-01 | 7.492E-01 |

|            |        |           |           |
|------------|--------|-----------|-----------|
| ZNF624     | -0.066 | 5.788E-01 | 7.546E-01 |
| NLRP5      | -0.066 | 9.468E-01 | 7.291E-01 |
| XIRP1      | -0.066 | 9.019E-01 | 7.437E-01 |
| MON1A      | -0.066 | 5.568E-01 | 7.036E-01 |
| HCST       | -0.066 | 8.590E-01 | 7.842E-01 |
| SIRT3      | -0.066 | 4.980E-01 | 9.146E-01 |
| OSGEP      | -0.066 | 4.949E-01 | 8.677E-01 |
| PLGLB2     | -0.066 | 8.735E-01 | 7.253E-01 |
| AIMP2      | -0.066 | 5.586E-01 | 9.531E-01 |
| YWHAE      | -0.066 | 5.155E-01 | 8.226E-01 |
| BRD9       | -0.066 | 5.467E-01 | 6.714E-01 |
| GABPB2     | -0.066 | 6.194E-01 | 6.226E-01 |
| RAVER1     | -0.067 | 6.136E-01 | 6.544E-01 |
| RNF185     | -0.067 | 4.562E-01 | 9.641E-01 |
| CYB5RL     | -0.067 | 6.805E-01 | 8.439E-01 |
| TMED6      | -0.067 | 6.149E-01 | 9.901E-01 |
| LIMS1      | -0.067 | 5.533E-01 | 9.191E-01 |
| RAI1       | -0.067 | 6.579E-01 | 9.780E-01 |
| ABCA4      | -0.067 | 8.906E-01 | 7.726E-01 |
| DCLRE1A    | -0.067 | 5.412E-01 | 7.028E-01 |
| GPR75      | -0.067 | 7.782E-01 | 7.349E-01 |
| CCS        | -0.067 | 6.308E-01 | 9.856E-01 |
| CCDC179    | -0.067 | NA        | 7.260E-01 |
| PFKFB3     | -0.067 | 7.860E-01 | 9.912E-01 |
| MIR216A    | -0.067 | NA        | 9.906E-01 |
| HAPLN4     | -0.067 | NA        | 9.900E-01 |
| MIR629     | -0.067 | NA        | 9.893E-01 |
| MIR4743    | -0.067 | NA        | 9.887E-01 |
| OR2T2      | -0.067 | NA        | 6.722E-01 |
| MIR8067    | -0.067 | NA        | 8.304E-01 |
| AC135068.1 | -0.067 | NA        | 6.995E-01 |
| TAAR9      | -0.067 | NA        | 9.100E-01 |
| H2AFB3     | -0.067 | NA        | 8.581E-01 |
| IFNA10     | -0.067 | NA        | 7.097E-01 |
| MIR542     | -0.067 | NA        | 8.827E-01 |
| HNRNPH3    | -0.067 | 2.964E-01 | 6.531E-01 |
| ZNF77      | -0.067 | 6.169E-01 | 7.492E-01 |
| C10orf88   | -0.067 | 4.062E-01 | 8.340E-01 |
| EXOSC6     | -0.067 | 4.470E-01 | 7.427E-01 |
| DLL4       | -0.067 | 7.464E-01 | 8.771E-01 |
| ZNF320     | -0.067 | 7.678E-01 | 7.901E-01 |
| EYA1       | -0.067 | 8.773E-01 | 7.010E-01 |
| PFDN4      | -0.067 | 5.659E-01 | 6.632E-01 |
| SLC27A5    | -0.067 | 7.792E-01 | 7.276E-01 |
| PTBP2      | -0.067 | 6.030E-01 | 7.370E-01 |
| AP1B1      | -0.067 | 5.730E-01 | 8.992E-01 |
| MIR5692A1  | -0.067 | NA        | 8.658E-01 |
| ZZEF1      | -0.067 | 5.173E-01 | 8.382E-01 |
| SLC12A7    | -0.067 | 7.354E-01 | 8.763E-01 |
| KDM5C      | -0.067 | 4.705E-01 | 7.646E-01 |

|            |        |           |           |
|------------|--------|-----------|-----------|
| TXLNG      | -0.067 | 5.373E-01 | 7.296E-01 |
| NIPSNAP3A  | -0.067 | 5.238E-01 | 7.509E-01 |
| SLC2A7     | -0.067 | 8.854E-01 | 7.380E-01 |
| UBXN4      | -0.067 | 4.432E-01 | 6.872E-01 |
| ZNF839     | -0.067 | 5.650E-01 | 6.995E-01 |
| PTPN2      | -0.067 | 5.194E-01 | 7.329E-01 |
| GTPBP8     | -0.067 | 4.736E-01 | 7.488E-01 |
| MAGEB18    | -0.068 | NA        | 7.570E-01 |
| MRPL48     | -0.068 | 5.141E-01 | 7.669E-01 |
| APOD       | -0.068 | 8.940E-01 | 9.121E-01 |
| MACF1      | -0.068 | 6.805E-01 | 7.084E-01 |
| YAE1D1     | -0.068 | 4.857E-01 | 6.958E-01 |
| PSMB6      | -0.068 | 5.418E-01 | 6.665E-01 |
| HIKESHI    | -0.068 | 4.715E-01 | 9.022E-01 |
| SERPIN8    | -0.068 | 7.240E-01 | 6.740E-01 |
| TTC5       | -0.068 | 4.729E-01 | 6.532E-01 |
| RAN        | -0.068 | 5.143E-01 | 7.052E-01 |
| CD163      | -0.068 | 8.800E-01 | 9.191E-01 |
| DXO        | -0.068 | 5.156E-01 | 9.313E-01 |
| DCDC2B     | -0.068 | 7.850E-01 | 8.486E-01 |
| ZNF155     | -0.068 | 6.935E-01 | 6.122E-01 |
| LHX5       | -0.068 | 8.936E-01 | 7.005E-01 |
| CREB1      | -0.068 | 3.587E-01 | 6.998E-01 |
| HEBP2      | -0.068 | 6.542E-01 | 7.523E-01 |
| ZBTB44     | -0.068 | 5.452E-01 | 7.252E-01 |
| CNEP1R1    | -0.068 | 3.735E-01 | 7.034E-01 |
| TLR9       | -0.068 | 8.631E-01 | 7.572E-01 |
| KDM5B      | -0.068 | 5.896E-01 | 6.892E-01 |
| TRMT112    | -0.068 | 5.246E-01 | 8.777E-01 |
| ROGDI      | -0.068 | 6.009E-01 | 7.395E-01 |
| MOCS2      | -0.068 | 4.591E-01 | 9.093E-01 |
| WDR43      | -0.068 | 4.893E-01 | 8.246E-01 |
| MIR4316    | -0.068 | NA        | 6.277E-01 |
| KRTAP10-12 | -0.068 | NA        | 6.408E-01 |
| PRAMEF19   | -0.068 | NA        | 8.547E-01 |
| TCF20      | -0.068 | 5.047E-01 | 6.138E-01 |
| MTA2       | -0.068 | 3.398E-01 | 7.057E-01 |
| FUK        | -0.068 | 6.266E-01 | 6.368E-01 |
| HPCA       | -0.068 | 7.908E-01 | 8.830E-01 |
| TTC33      | -0.068 | 5.758E-01 | 8.422E-01 |
| MIR769     | -0.068 | NA        | 6.449E-01 |
| POLK       | -0.068 | 5.246E-01 | 9.798E-01 |
| ARHGAP5    | -0.068 | 6.062E-01 | 8.611E-01 |
| C19orf43   | -0.068 | 5.670E-01 | 6.423E-01 |
| PSRC1      | -0.068 | 7.086E-01 | 6.895E-01 |
| GPR34      | -0.068 | 8.436E-01 | 9.338E-01 |
| MIR598     | -0.068 | NA        | 7.345E-01 |
| ATP1A1     | -0.069 | 6.474E-01 | 7.330E-01 |
| AC020915.2 | -0.069 | 6.915E-01 | 7.398E-01 |
| SLC6A16    | -0.069 | 8.570E-01 | 9.520E-01 |



|            |        |           |           |
|------------|--------|-----------|-----------|
| ZNF589     | -0.069 | 6.040E-01 | 7.681E-01 |
| KCNQ1      | -0.069 | 8.397E-01 | 9.435E-01 |
| ANKRD20A4  | -0.069 | 9.081E-01 | 8.780E-01 |
| GLMN       | -0.069 | 5.282E-01 | 7.412E-01 |
| NKX2-2     | -0.069 | 9.458E-01 | 7.223E-01 |
| GPALPP1    | -0.069 | 4.952E-01 | 6.535E-01 |
| SSR4       | -0.069 | 6.494E-01 | 6.873E-01 |
| LYG1       | -0.069 | 7.816E-01 | 9.053E-01 |
| C12orf76   | -0.069 | 4.434E-01 | 8.773E-01 |
| MPV17L2    | -0.069 | 5.032E-01 | 6.237E-01 |
| FMNL1      | -0.069 | 7.772E-01 | 7.018E-01 |
| PRR7       | -0.069 | 7.585E-01 | 7.269E-01 |
| PTS        | -0.069 | 4.730E-01 | 7.544E-01 |
| NOX3       | -0.069 | NA        | 8.942E-01 |
| OR2AK2     | -0.069 | NA        | 8.298E-01 |
| TRIM23     | -0.069 | 4.765E-01 | 6.948E-01 |
| QTRT2      | -0.069 | 4.289E-01 | 8.550E-01 |
| LIN7C      | -0.069 | 4.367E-01 | 6.037E-01 |
| ITPKB      | -0.069 | 6.016E-01 | 6.854E-01 |
| CMTR1      | -0.069 | 3.918E-01 | 8.309E-01 |
| ARL16      | -0.069 | 5.795E-01 | 6.591E-01 |
| EPOP       | -0.069 | 7.771E-01 | 8.097E-01 |
| GJC2       | -0.069 | 7.925E-01 | 8.628E-01 |
| PAPD5      | -0.069 | 4.391E-01 | 9.808E-01 |
| DERL2      | -0.069 | 4.244E-01 | 9.848E-01 |
| TSEN54     | -0.069 | 5.059E-01 | 9.855E-01 |
| ARMC6      | -0.069 | 4.551E-01 | 7.055E-01 |
| ZNF620     | -0.069 | 7.309E-01 | 6.551E-01 |
| BAP1       | -0.069 | 4.299E-01 | 6.667E-01 |
| GP1BA      | -0.070 | 8.158E-01 | 6.460E-01 |
| ZNF791     | -0.070 | 3.735E-01 | 7.288E-01 |
| PFDN1      | -0.070 | 3.262E-01 | 6.873E-01 |
| CD2AP      | -0.070 | 6.582E-01 | 9.182E-01 |
| HEATR4     | -0.070 | 7.441E-01 | 8.342E-01 |
| VDR        | -0.070 | 7.538E-01 | 9.265E-01 |
| NBPF6      | -0.070 | 9.218E-01 | 8.050E-01 |
| AC009014.1 | -0.070 | 9.133E-01 | 7.659E-01 |
| SRSF3      | -0.070 | 1.846E-01 | 6.587E-01 |
| MIR4304    | -0.070 | NA        | 7.504E-01 |
| MIR4681    | -0.070 | NA        | 7.090E-01 |
| OR8B8      | -0.070 | NA        | 8.474E-01 |
| AC007375.2 | -0.070 | NA        | 7.790E-01 |
| MIR4267    | -0.070 | NA        | 6.986E-01 |
| MIR6766    | -0.070 | NA        | 9.482E-01 |
| OR10AG1    | -0.070 | NA        | 8.536E-01 |
| FAM207A    | -0.070 | 6.779E-01 | 6.814E-01 |
| PLEKHN1    | -0.070 | 7.993E-01 | 9.030E-01 |
| HMOX2      | -0.070 | 5.436E-01 | 9.015E-01 |
| CNPPD1     | -0.070 | 4.726E-01 | 9.288E-01 |
| CLK2       | -0.070 | 5.624E-01 | 8.047E-01 |

|            |        |           |           |
|------------|--------|-----------|-----------|
| SLC22A7    | -0.070 | 9.347E-01 | 7.770E-01 |
| ZNF48      | -0.070 | 6.440E-01 | 7.538E-01 |
| DYRK4      | -0.070 | 6.904E-01 | 8.866E-01 |
| DNAJA4     | -0.070 | 7.334E-01 | 7.197E-01 |
| SCLT1      | -0.070 | 4.613E-01 | 9.917E-01 |
| IBSP       | -0.070 | 8.681E-01 | 9.916E-01 |
| HMG20A     | -0.070 | 5.729E-01 | 9.910E-01 |
| HSF4       | -0.070 | 7.719E-01 | 9.909E-01 |
| AC003005.1 | -0.070 | NA        | 9.908E-01 |
| UBR1       | -0.070 | 4.841E-01 | 9.908E-01 |
| HPF1       | -0.070 | 4.798E-01 | 9.902E-01 |
| UTP11      | -0.070 | 3.855E-01 | 9.894E-01 |
| MFSD8      | -0.070 | 4.177E-01 | 7.229E-01 |
| GNB1L      | -0.070 | 6.761E-01 | 8.634E-01 |
| SLAMF8     | -0.070 | 8.514E-01 | 6.565E-01 |
| IQCE       | -0.070 | 5.957E-01 | 9.662E-01 |
| WDR5       | -0.070 | 5.374E-01 | 9.104E-01 |
| GRK7       | -0.070 | 8.279E-01 | 6.788E-01 |
| FEZF1      | -0.070 | 9.152E-01 | 8.077E-01 |
| NT5DC2     | -0.070 | 7.101E-01 | 7.823E-01 |
| RNF114     | -0.070 | 4.076E-01 | 7.115E-01 |
| TRNT1      | -0.070 | 4.524E-01 | 8.968E-01 |
| NUP88      | -0.070 | 4.820E-01 | 7.140E-01 |
| KLHL2      | -0.071 | 6.432E-01 | 6.137E-01 |
| NEMP1      | -0.071 | 6.348E-01 | 8.090E-01 |
| MECP2      | -0.071 | 3.665E-01 | 8.838E-01 |
| EEF1D      | -0.071 | 4.913E-01 | 6.385E-01 |
| PPIF       | -0.071 | 7.051E-01 | 7.531E-01 |
| PPFIA1     | -0.071 | 6.497E-01 | 6.117E-01 |
| TMSB10     | -0.071 | 7.280E-01 | 7.497E-01 |
| ZNF804B    | -0.071 | 9.474E-01 | 7.676E-01 |
| GTPBP6     | -0.071 | 5.533E-01 | 8.199E-01 |
| YLPM1      | -0.071 | 3.526E-01 | 6.830E-01 |
| MYBL1      | -0.071 | 7.932E-01 | 8.542E-01 |
| TEX22      | -0.071 | 7.793E-01 | 7.399E-01 |
| RPS16      | -0.071 | 6.057E-01 | 7.522E-01 |
| GDF10      | -0.071 | 8.984E-01 | 8.277E-01 |
| AHSG       | -0.071 | 9.494E-01 | 5.942E-01 |
| DERA       | -0.071 | 5.978E-01 | 8.295E-01 |
| NCAPG      | -0.071 | 7.171E-01 | 8.634E-01 |
| PSD3       | -0.071 | 7.321E-01 | 8.758E-01 |
| PRR23B     | -0.071 | NA        | 7.039E-01 |
| MIR3194    | -0.071 | NA        | 6.504E-01 |
| GCAT       | -0.071 | 7.232E-01 | 7.928E-01 |
| CAAP1      | -0.071 | 5.310E-01 | 7.728E-01 |
| NDUFB4     | -0.071 | 4.362E-01 | 9.345E-01 |
| PCDHB5     | -0.071 | 8.847E-01 | 6.934E-01 |
| AGPS       | -0.071 | 4.998E-01 | 8.488E-01 |
| LTBR       | -0.071 | 5.348E-01 | 6.858E-01 |
| MIR602     | -0.071 | NA        | 8.153E-01 |

|          |        |           |           |
|----------|--------|-----------|-----------|
| NECAP1   | -0.071 | 4.053E-01 | 7.194E-01 |
| TAPBP    | -0.071 | 6.590E-01 | 7.049E-01 |
| PBDC1    | -0.071 | 4.962E-01 | 7.914E-01 |
| MRM1     | -0.071 | 6.215E-01 | 6.757E-01 |
| RPH3A    | -0.071 | 8.727E-01 | 7.330E-01 |
| CSTF2T   | -0.071 | 6.273E-01 | 8.170E-01 |
| CARF     | -0.071 | 6.151E-01 | 6.208E-01 |
| FAHD2B   | -0.071 | 7.641E-01 | 6.715E-01 |
| NUP54    | -0.071 | 3.918E-01 | 8.855E-01 |
| UQCRC1   | -0.071 | 5.136E-01 | 7.044E-01 |
| TAF5     | -0.071 | 5.348E-01 | 9.249E-01 |
| PAN3     | -0.071 | 5.124E-01 | 8.663E-01 |
| RABEPK   | -0.071 | 5.004E-01 | 8.316E-01 |
| CYP4F3   | -0.071 | 8.909E-01 | 7.220E-01 |
| SMIM14   | -0.071 | 6.324E-01 | 6.733E-01 |
| GNAZ     | -0.071 | 8.587E-01 | 6.800E-01 |
| ZNF140   | -0.071 | 5.478E-01 | 9.244E-01 |
| TCP11L2  | -0.071 | 7.083E-01 | 6.913E-01 |
| ADAMTS18 | -0.071 | 8.667E-01 | 9.779E-01 |
| SS18L2   | -0.071 | 5.353E-01 | 6.914E-01 |
| LMAN2    | -0.071 | 4.806E-01 | 9.667E-01 |
| PTCHD3   | -0.071 | 9.314E-01 | 8.183E-01 |
| ZNF816   | -0.071 | 7.125E-01 | 7.429E-01 |
| ZNF423   | -0.071 | 8.167E-01 | 8.559E-01 |
| DNAAF4   | -0.071 | 6.991E-01 | 6.820E-01 |
| DPH5     | -0.071 | 4.442E-01 | 7.242E-01 |
| TWF2     | -0.071 | 5.859E-01 | 7.277E-01 |
| RAB28    | -0.072 | 3.542E-01 | 9.219E-01 |
| NBEAL1   | -0.072 | 6.530E-01 | 6.756E-01 |
| COA6     | -0.072 | 5.533E-01 | 6.056E-01 |
| TNK2     | -0.072 | 6.776E-01 | 8.739E-01 |
| TSG101   | -0.072 | 3.603E-01 | 9.458E-01 |
| MSANTD4  | -0.072 | 5.436E-01 | 7.822E-01 |
| STX6     | -0.072 | 4.733E-01 | 8.704E-01 |
| ZFP62    | -0.072 | 5.887E-01 | 7.001E-01 |
| ZNF580   | -0.072 | 6.413E-01 | 6.199E-01 |
| ZBTB6    | -0.072 | 5.100E-01 | 6.414E-01 |
| NIF3L1   | -0.072 | 3.293E-01 | 7.102E-01 |
| SHQ1     | -0.072 | 5.213E-01 | 7.512E-01 |
| PRAMEF1  | -0.072 | 9.695E-01 | 8.276E-01 |
| C3orf35  | -0.072 | 7.865E-01 | 7.036E-01 |
| KARS     | -0.072 | 4.425E-01 | 6.060E-01 |
| CLK3     | -0.072 | 4.763E-01 | 9.176E-01 |
| TMEM126B | -0.072 | 3.856E-01 | 6.794E-01 |
| SPAG4    | -0.072 | 7.889E-01 | 7.134E-01 |
| TREM1    | -0.072 | 8.735E-01 | 8.985E-01 |
| KCNC4    | -0.072 | 7.696E-01 | 5.714E-01 |
| MIR218-2 | -0.072 | NA        | 8.106E-01 |
| ZNF280B  | -0.072 | 8.773E-01 | 7.902E-01 |
| SESN2    | -0.072 | 6.067E-01 | 8.387E-01 |

|            |        |           |           |
|------------|--------|-----------|-----------|
| NSMF       | -0.072 | 6.729E-01 | 7.982E-01 |
| GABRD      | -0.072 | 8.172E-01 | 7.066E-01 |
| PRKD3      | -0.072 | 5.521E-01 | 8.469E-01 |
| PIAS4      | -0.072 | 3.688E-01 | 6.546E-01 |
| MAT2A      | -0.072 | 5.004E-01 | 6.391E-01 |
| TOP3B      | -0.072 | 6.839E-01 | 6.800E-01 |
| PRDM1      | -0.072 | 7.767E-01 | 9.248E-01 |
| NEIL3      | -0.072 | 7.882E-01 | 8.527E-01 |
| C9orf24    | -0.072 | 8.092E-01 | 6.794E-01 |
| LIN9       | -0.072 | 5.722E-01 | 8.836E-01 |
| AP003108.2 | -0.072 | 5.248E-01 | 9.800E-01 |
| SS18       | -0.072 | 3.805E-01 | 9.816E-01 |
| LIMD1      | -0.072 | 5.539E-01 | 9.853E-01 |
| SNRPN      | -0.072 | 7.927E-01 | 8.393E-01 |
| TIGD6      | -0.072 | 3.675E-01 | 7.111E-01 |
| SMG1       | -0.072 | 4.997E-01 | 6.695E-01 |
| DCTN6      | -0.072 | 4.762E-01 | 6.936E-01 |
| ELMOD2     | -0.072 | 3.820E-01 | 7.020E-01 |
| INO80      | -0.072 | 2.575E-01 | 8.971E-01 |
| CST3       | -0.072 | 6.938E-01 | 8.114E-01 |
| RHBG       | -0.072 | 8.940E-01 | 8.881E-01 |
| AP5S1      | -0.072 | 5.194E-01 | 7.255E-01 |
| ULK1       | -0.072 | 5.733E-01 | 6.595E-01 |
| SVOP       | -0.072 | 9.003E-01 | 6.473E-01 |
| CISH       | -0.072 | 6.837E-01 | 6.386E-01 |
| MINK1      | -0.072 | 5.412E-01 | 7.215E-01 |
| RNASE7     | -0.072 | 8.893E-01 | 6.880E-01 |
| CHMP4C     | -0.072 | 7.105E-01 | 6.203E-01 |
| MIR28      | -0.072 | NA        | 6.108E-01 |
| MIR934     | -0.072 | NA        | 9.018E-01 |
| AC068234.1 | -0.072 | NA        | 6.222E-01 |
| AC187653.1 | -0.072 | NA        | 9.130E-01 |
| OR11H12    | -0.072 | NA        | 6.904E-01 |
| POLDIP3    | -0.072 | 3.655E-01 | 6.839E-01 |
| HAGHL      | -0.073 | 7.752E-01 | 6.967E-01 |
| CCDC180    | -0.073 | 8.222E-01 | 6.827E-01 |
| ASPDH      | -0.073 | 8.369E-01 | 6.836E-01 |
| SCAF11     | -0.073 | 4.225E-01 | 6.628E-01 |
| ECI2       | -0.073 | 6.833E-01 | 6.869E-01 |
| METT5      | -0.073 | 3.970E-01 | 8.654E-01 |
| GATC       | -0.073 | 2.983E-01 | 6.942E-01 |
| CCDC38     | -0.073 | 8.632E-01 | 7.546E-01 |
| MIR619     | -0.073 | NA        | 6.367E-01 |
| ZNF358     | -0.073 | 6.942E-01 | 9.923E-01 |
| MRPL11     | -0.073 | 5.986E-01 | 9.916E-01 |
| NAT9       | -0.073 | 4.966E-01 | 9.915E-01 |
| OSGIN1     | -0.073 | 8.386E-01 | 9.915E-01 |
| TAPT1      | -0.073 | 3.996E-01 | 9.914E-01 |
| ARNTL      | -0.073 | 6.414E-01 | 9.914E-01 |
| IMP4       | -0.073 | 4.282E-01 | 9.914E-01 |

|            |        |           |           |
|------------|--------|-----------|-----------|
| NAF1       | -0.073 | 4.206E-01 | 8.819E-01 |
| DENND2C    | -0.073 | 7.970E-01 | 5.330E-01 |
| MAP1S      | -0.073 | 4.604E-01 | 7.599E-01 |
| AXIN2      | -0.073 | 8.333E-01 | 6.797E-01 |
| SAYS1      | -0.073 | 4.735E-01 | 8.777E-01 |
| RAB21      | -0.073 | 5.012E-01 | 8.463E-01 |
| RALGAPA1   | -0.073 | 5.798E-01 | 7.329E-01 |
| DPP7       | -0.073 | 6.556E-01 | 5.996E-01 |
| GTF3C5     | -0.073 | 5.793E-01 | 8.228E-01 |
| RXRA       | -0.073 | 6.519E-01 | 8.229E-01 |
| MIR4660    | -0.073 | NA        | 6.640E-01 |
| POLE2      | -0.073 | 6.582E-01 | 7.453E-01 |
| TAF7       | -0.073 | 4.535E-01 | 6.740E-01 |
| CCND1      | -0.073 | 8.298E-01 | 7.158E-01 |
| EFCAB5     | -0.073 | 7.899E-01 | 7.387E-01 |
| UNKL       | -0.073 | 5.613E-01 | 5.926E-01 |
| PTMA       | -0.074 | 3.879E-01 | 7.274E-01 |
| HGH1       | -0.074 | 5.093E-01 | 8.775E-01 |
| CSRNP2     | -0.074 | 5.146E-01 | 8.018E-01 |
| RHBDD1     | -0.074 | 4.181E-01 | 7.907E-01 |
| CTDP1      | -0.074 | 3.786E-01 | 7.106E-01 |
| SRGN       | -0.074 | 8.292E-01 | 6.308E-01 |
| ALYREF     | -0.074 | 5.500E-01 | 6.612E-01 |
| C8A        | -0.074 | 9.523E-01 | 7.669E-01 |
| ATXN7L3B   | -0.074 | 5.000E-01 | 6.770E-01 |
| NDUFS8     | -0.074 | 6.185E-01 | 7.011E-01 |
| MIR4428    | -0.074 | NA        | 8.295E-01 |
| TBCC       | -0.074 | 4.415E-01 | 7.701E-01 |
| PSAT1      | -0.074 | 7.563E-01 | 7.217E-01 |
| ALKAL1     | -0.074 | 8.693E-01 | 6.234E-01 |
| HMGB1      | -0.074 | 3.438E-01 | 9.033E-01 |
| CASKIN2    | -0.074 | 4.242E-01 | 5.936E-01 |
| JARID2     | -0.074 | 6.915E-01 | 8.735E-01 |
| MIR5696    | -0.074 | NA        | 8.928E-01 |
| SEM1       | -0.074 | 5.436E-01 | 6.255E-01 |
| KRI1       | -0.074 | 4.715E-01 | 5.564E-01 |
| HPSE       | -0.074 | 8.217E-01 | 9.156E-01 |
| STXBP4     | -0.074 | 5.655E-01 | 7.846E-01 |
| C15orf40   | -0.074 | 3.911E-01 | 6.761E-01 |
| LAMTOR4    | -0.074 | 6.321E-01 | 6.093E-01 |
| PPP1R26    | -0.074 | 6.027E-01 | 6.885E-01 |
| COMMD6     | -0.074 | 5.405E-01 | 8.026E-01 |
| THNSL1     | -0.074 | 6.897E-01 | 8.339E-01 |
| DUSP22     | -0.074 | 5.483E-01 | 6.515E-01 |
| AC099850.2 | -0.074 | NA        | 8.832E-01 |
| AC129492.3 | -0.074 | NA        | 6.230E-01 |
| MIR218-1   | -0.074 | NA        | 7.337E-01 |
| MIR3689B   | -0.074 | NA        | 9.153E-01 |
| MIR498     | -0.074 | NA        | 9.054E-01 |
| MIR5002    | -0.074 | NA        | 6.170E-01 |

|           |        |           |           |
|-----------|--------|-----------|-----------|
| MIR513A1  | -0.074 | NA        | 6.658E-01 |
| MIR519C   | -0.074 | NA        | 5.690E-01 |
| MIR526A2  | -0.074 | NA        | 8.942E-01 |
| MIR548A2  | -0.074 | NA        | 8.787E-01 |
| MIR5692C1 | -0.074 | NA        | 7.318E-01 |
| MIR6892   | -0.074 | NA        | 6.054E-01 |
| MIR7158   | -0.074 | NA        | 9.738E-01 |
| MIR8059   | -0.074 | NA        | 7.796E-01 |
| OR13C9    | -0.074 | NA        | 7.333E-01 |
| OR2T5     | -0.074 | NA        | 6.830E-01 |
| CENPVL1   | -0.074 | NA        | 8.232E-01 |
| MIR300    | -0.074 | NA        | 9.594E-01 |
| MIR3118-1 | -0.074 | NA        | 6.920E-01 |
| MIR3925   | -0.074 | NA        | 7.382E-01 |
| MIR409    | -0.074 | NA        | 6.122E-01 |
| MIR504    | -0.074 | NA        | 5.880E-01 |
| MIR518E   | -0.074 | NA        | 6.708E-01 |
| MIR539    | -0.074 | NA        | 7.583E-01 |
| MIR638    | -0.074 | NA        | 5.471E-01 |
| MIR663B   | -0.074 | NA        | 6.521E-01 |
| MIR892A   | -0.074 | NA        | 7.167E-01 |
| NPIPA2    | -0.074 | NA        | 8.840E-01 |
| OR4K17    | -0.074 | NA        | 7.614E-01 |
| OR51A2    | -0.074 | NA        | 8.814E-01 |
| OR6C65    | -0.074 | NA        | 7.976E-01 |
| RNASE11   | -0.074 | NA        | 8.826E-01 |
| OR5H15    | -0.074 | NA        | 5.999E-01 |
| PCM1      | -0.074 | 4.997E-01 | 9.196E-01 |
| KLHL25    | -0.074 | 5.566E-01 | 6.876E-01 |
| KCND3     | -0.074 | 8.558E-01 | 9.417E-01 |
| IQCF1     | -0.074 | 9.320E-01 | 6.606E-01 |
| MIR8070   | -0.074 | NA        | 6.467E-01 |
| PTPN18    | -0.074 | 5.753E-01 | 5.877E-01 |
| TEX10     | -0.074 | 4.584E-01 | 5.397E-01 |
| TBC1D10A  | -0.074 | 5.213E-01 | 6.871E-01 |
| RIMKLA    | -0.074 | 8.569E-01 | 6.024E-01 |
| POLG2     | -0.074 | 5.166E-01 | 9.096E-01 |
| ACKR3     | -0.074 | 8.147E-01 | 7.031E-01 |
| LILRA4    | -0.074 | 8.704E-01 | 6.380E-01 |
| PDP2      | -0.074 | 4.767E-01 | 6.187E-01 |
| BCR       | -0.074 | 5.697E-01 | 8.976E-01 |
| EBNA1BP2  | -0.074 | 5.593E-01 | 5.832E-01 |
| NDUFB10   | -0.074 | 5.322E-01 | 8.559E-01 |
| POLQ      | -0.074 | 6.829E-01 | 5.841E-01 |
| SNW1      | -0.074 | 2.737E-01 | 8.478E-01 |
| MRPL21    | -0.074 | 6.348E-01 | 5.616E-01 |
| SPRYD7    | -0.074 | 5.803E-01 | 7.852E-01 |
| PCF11     | -0.074 | 4.582E-01 | 9.820E-01 |
| IL32      | -0.075 | 8.384E-01 | 6.145E-01 |
| MIR4639   | -0.075 | 8.878E-01 | 7.227E-01 |

|            |        |           |           |
|------------|--------|-----------|-----------|
| LRP5       | -0.075 | 6.476E-01 | 9.357E-01 |
| PTPN4      | -0.075 | 3.668E-01 | 4.288E-01 |
| TAF6L      | -0.075 | 4.148E-01 | 5.491E-01 |
| NUDT1      | -0.075 | 6.416E-01 | 9.068E-01 |
| SIRT7      | -0.075 | 5.373E-01 | 9.591E-01 |
| SF3B1      | -0.075 | 3.525E-01 | 8.108E-01 |
| PRMT6      | -0.075 | 5.964E-01 | 9.514E-01 |
| C7orf31    | -0.075 | 7.021E-01 | 9.287E-01 |
| RPS4Y1     | -0.075 | 9.084E-01 | 8.906E-01 |
| ITFG2      | -0.075 | 4.256E-01 | 9.552E-01 |
| TREX2      | -0.075 | 7.644E-01 | 7.586E-01 |
| ESRP2      | -0.075 | 7.519E-01 | 6.780E-01 |
| NUS1       | -0.075 | 3.789E-01 | 7.020E-01 |
| FAM192A    | -0.075 | 3.330E-01 | 6.600E-01 |
| SIGLEC1    | -0.075 | 8.528E-01 | 6.749E-01 |
| GEMIN7     | -0.075 | 5.188E-01 | 6.634E-01 |
| CCDC84     | -0.075 | 6.603E-01 | 6.207E-01 |
| DDX21      | -0.075 | 6.292E-01 | 6.581E-01 |
| TTC4       | -0.075 | 4.446E-01 | 6.578E-01 |
| SERTAD3    | -0.075 | 5.070E-01 | 6.267E-01 |
| ASPH       | -0.075 | 7.229E-01 | 7.461E-01 |
| ELMOD3     | -0.075 | 4.412E-01 | 7.516E-01 |
| CREG2      | -0.075 | 8.587E-01 | 8.374E-01 |
| COX11      | -0.075 | 3.460E-01 | 8.057E-01 |
| PTCD1      | -0.075 | 4.832E-01 | 5.625E-01 |
| NOP56      | -0.075 | 4.707E-01 | 7.173E-01 |
| ATP5L      | -0.075 | 4.546E-01 | 6.838E-01 |
| ARL14EP    | -0.075 | 4.278E-01 | 5.947E-01 |
| AL139260.3 | -0.075 | 7.583E-01 | 9.924E-01 |
| EMC9       | -0.075 | 6.147E-01 | 9.924E-01 |
| NAT8L      | -0.075 | 8.870E-01 | 9.924E-01 |
| RASAL1     | -0.075 | 8.513E-01 | 9.924E-01 |
| AARSD1     | -0.075 | 4.906E-01 | 9.924E-01 |
| CNOT8      | -0.075 | 3.245E-01 | 9.924E-01 |
| C17orf105  | -0.075 | 8.695E-01 | 6.737E-01 |
| ALG10      | -0.075 | 5.489E-01 | 7.878E-01 |
| RNF217     | -0.075 | 7.877E-01 | 6.714E-01 |
| MIR875     | -0.075 | NA        | 6.779E-01 |
| MKRN2      | -0.075 | 5.837E-01 | 8.535E-01 |
| MED4       | -0.075 | 3.473E-01 | 9.281E-01 |
| SP5        | -0.075 | 8.861E-01 | 7.777E-01 |
| MIR4500    | -0.075 | NA        | 6.737E-01 |
| OR8B2      | -0.075 | NA        | 6.049E-01 |
| FP565260.4 | -0.075 | NA        | 7.677E-01 |
| KRTAP4-3   | -0.075 | NA        | 6.989E-01 |
| MIR1255B2  | -0.075 | NA        | 7.133E-01 |
| MIR1288    | -0.075 | NA        | 6.241E-01 |
| UCP2       | -0.075 | 7.778E-01 | 9.635E-01 |
| SGO2       | -0.075 | 6.361E-01 | 5.396E-01 |
| PRDM10     | -0.075 | 3.561E-01 | 8.712E-01 |

|            |        |           |           |
|------------|--------|-----------|-----------|
| MTHFD1L    | -0.075 | 6.606E-01 | 8.290E-01 |
| PMF1-BGLAI | -0.075 | 6.594E-01 | 8.843E-01 |
| AP5B1      | -0.075 | 5.124E-01 | 5.922E-01 |
| UBE2O      | -0.075 | 3.598E-01 | 6.331E-01 |
| OTUD3      | -0.075 | 6.128E-01 | 7.441E-01 |
| ZMYM3      | -0.075 | 4.331E-01 | 9.685E-01 |
| TSPAN17    | -0.075 | 4.471E-01 | 5.788E-01 |
| ZNF267     | -0.075 | 4.500E-01 | 8.609E-01 |
| POLR3E     | -0.075 | 4.133E-01 | 4.739E-01 |
| SLC48A1    | -0.076 | 5.829E-01 | 6.020E-01 |
| AL136531.2 | -0.076 | 7.981E-01 | 6.531E-01 |
| DMP1       | -0.076 | 8.534E-01 | 7.360E-01 |
| CBWD5      | -0.076 | 5.408E-01 | 7.065E-01 |
| DIRC3      | -0.076 | 8.503E-01 | 5.334E-01 |
| RPP40      | -0.076 | 5.434E-01 | 6.865E-01 |
| NSMCE4A    | -0.076 | 4.251E-01 | 6.553E-01 |
| DHRS12     | -0.076 | 6.215E-01 | 5.337E-01 |
| SURF2      | -0.076 | 6.127E-01 | 5.944E-01 |
| MTHFS      | -0.076 | 5.367E-01 | 8.849E-01 |
| C17orf80   | -0.076 | 3.456E-01 | 6.071E-01 |
| BDNF       | -0.076 | 8.469E-01 | 7.348E-01 |
| ZNF574     | -0.076 | 3.994E-01 | 7.067E-01 |
| ZNF600     | -0.076 | 6.763E-01 | 6.424E-01 |
| CSNK2A3    | -0.076 | 7.494E-01 | 6.539E-01 |
| MIR570     | -0.076 | 7.169E-01 | 6.990E-01 |
| CYLD       | -0.076 | 5.803E-01 | 7.694E-01 |
| KIAA1671   | -0.076 | 6.722E-01 | 8.914E-01 |
| HSDL1      | -0.076 | 4.242E-01 | 6.349E-01 |
| CABIN1     | -0.076 | 4.770E-01 | 7.763E-01 |
| LMOD3      | -0.076 | 7.765E-01 | 6.171E-01 |
| MRPL27     | -0.076 | 5.706E-01 | 5.433E-01 |
| MX2        | -0.076 | 7.574E-01 | 6.263E-01 |
| TEX45      | -0.076 | 8.703E-01 | 5.751E-01 |
| LENG8      | -0.076 | 6.117E-01 | 8.919E-01 |
| VCPIP1     | -0.076 | 3.504E-01 | 6.689E-01 |
| C14orf79   | -0.076 | 5.744E-01 | 8.595E-01 |
| WDR33      | -0.076 | 1.152E-01 | 6.671E-01 |
| SYMPK      | -0.076 | 3.446E-01 | 5.361E-01 |
| TYRO3      | -0.076 | 6.644E-01 | 6.500E-01 |
| POLRMT     | -0.076 | 4.835E-01 | 6.783E-01 |
| SMCR8      | -0.076 | 5.656E-01 | 8.867E-01 |
| ARHGEF6    | -0.076 | 7.493E-01 | 8.636E-01 |
| ZNF330     | -0.077 | 3.331E-01 | 7.364E-01 |
| SCO1       | -0.077 | 4.261E-01 | 5.260E-01 |
| PDIA2      | -0.077 | 8.728E-01 | 6.224E-01 |
| SFXN4      | -0.077 | 5.241E-01 | 7.904E-01 |
| TMEM223    | -0.077 | 5.136E-01 | 6.204E-01 |
| CGRRF1     | -0.077 | 4.137E-01 | 5.852E-01 |
| SSTR3      | -0.077 | 8.765E-01 | 8.714E-01 |
| MIR4733    | -0.077 | NA        | 5.317E-01 |



|          |        |           |           |
|----------|--------|-----------|-----------|
| MEGF8    | -0.077 | 5.241E-01 | 7.232E-01 |
| ROBO1    | -0.077 | 8.171E-01 | 6.025E-01 |
| DNAJC4   | -0.077 | 5.751E-01 | 6.914E-01 |
| TMPRSS9  | -0.077 | 7.122E-01 | 9.011E-01 |
| BBS2     | -0.077 | 4.170E-01 | 6.395E-01 |
| MGAT4B   | -0.077 | 4.660E-01 | 5.371E-01 |
| DALRD3   | -0.077 | 4.709E-01 | 9.278E-01 |
| KAT6B    | -0.077 | 5.670E-01 | 6.571E-01 |
| DEFB121  | -0.077 | NA        | 6.081E-01 |
| MIR1266  | -0.077 | NA        | 6.507E-01 |
| MIR585   | -0.077 | NA        | 7.077E-01 |
| MIR6879  | -0.077 | NA        | 6.650E-01 |
| OR1D2    | -0.077 | NA        | 5.668E-01 |
| PRAMEF25 | -0.077 | NA        | 7.680E-01 |
| MIR3713  | -0.077 | NA        | 7.499E-01 |
| MIR4765  | -0.077 | NA        | 7.735E-01 |
| OR2T34   | -0.077 | NA        | 7.683E-01 |
| OR51D1   | -0.077 | NA        | 7.901E-01 |
| OR5F1    | -0.077 | NA        | 6.569E-01 |
| OR9Q2    | -0.077 | NA        | 9.436E-01 |
| HS3ST3A1 | -0.077 | 8.878E-01 | 9.813E-01 |
| SLC9B2   | -0.077 | 7.274E-01 | 9.850E-01 |
| HSD3B2   | -0.077 | 9.107E-01 | 8.242E-01 |
| RREB1    | -0.077 | 4.705E-01 | 7.290E-01 |
| MTFMT    | -0.077 | 3.286E-01 | 6.261E-01 |
| ANKRD42  | -0.077 | 4.854E-01 | 6.166E-01 |
| GSTA4    | -0.077 | 7.931E-01 | 6.634E-01 |
| HNRNPC   | -0.077 | 2.176E-01 | 6.344E-01 |
| SERP2    | -0.077 | 8.086E-01 | 4.853E-01 |
| LRIG2    | -0.077 | 3.841E-01 | 8.063E-01 |
| ANKRD49  | -0.077 | 4.331E-01 | 8.817E-01 |
| G3BP1    | -0.077 | 4.182E-01 | 8.632E-01 |
| MIR4642  | -0.077 | NA        | 6.494E-01 |
| RTL6     | -0.077 | 6.565E-01 | 7.345E-01 |
| IER3     | -0.077 | 7.677E-01 | 4.701E-01 |
| FKBP6    | -0.077 | 8.769E-01 | 8.379E-01 |
| SPPL3    | -0.077 | 3.180E-01 | 6.335E-01 |
| MTF2     | -0.077 | 4.090E-01 | 6.502E-01 |
| PEX5     | -0.077 | 3.793E-01 | 6.289E-01 |
| TFB2M    | -0.077 | 4.062E-01 | 5.494E-01 |
| SSBP1    | -0.077 | 3.944E-01 | 6.082E-01 |
| ZNF70    | -0.077 | 5.593E-01 | 6.607E-01 |
| PDCD7    | -0.077 | 2.989E-01 | 5.720E-01 |
| MTFR2    | -0.077 | 6.556E-01 | 7.277E-01 |
| HYKK     | -0.077 | 6.036E-01 | 5.954E-01 |
| BRD4     | -0.077 | 2.366E-01 | 5.627E-01 |
| NDFIP1   | -0.077 | 3.061E-01 | 6.859E-01 |
| NABP1    | -0.077 | 7.240E-01 | 6.522E-01 |
| ZXDB     | -0.077 | 5.038E-01 | 5.926E-01 |
| IRS2     | -0.077 | 7.864E-01 | 5.378E-01 |

|          |        |           |           |
|----------|--------|-----------|-----------|
| PQBP1    | -0.077 | 5.053E-01 | 5.071E-01 |
| CD36     | -0.077 | 8.801E-01 | 6.087E-01 |
| IL19     | -0.077 | 8.880E-01 | 7.916E-01 |
| ZNF782   | -0.078 | 5.613E-01 | 8.904E-01 |
| TCF25    | -0.078 | 3.638E-01 | 8.648E-01 |
| PLSCR1   | -0.078 | 6.393E-01 | 5.726E-01 |
| ZFAND1   | -0.078 | 4.485E-01 | 4.721E-01 |
| CYCS     | -0.078 | 4.444E-01 | 8.026E-01 |
| DFNB59   | -0.078 | 7.214E-01 | 6.104E-01 |
| WEE2     | -0.078 | 8.033E-01 | 9.916E-01 |
| FBXL2    | -0.078 | 7.004E-01 | 9.916E-01 |
| LSM4     | -0.078 | 4.378E-01 | 9.916E-01 |
| GDPGP1   | -0.078 | 5.732E-01 | 9.563E-01 |
| RFC5     | -0.078 | 4.988E-01 | 6.536E-01 |
| RRP8     | -0.078 | 3.149E-01 | 6.367E-01 |
| RAB4B    | -0.078 | 6.060E-01 | 9.580E-01 |
| PAWR     | -0.078 | 4.939E-01 | 5.573E-01 |
| TRMT10B  | -0.078 | 4.737E-01 | 7.243E-01 |
| HRH4     | -0.078 | 8.261E-01 | 6.078E-01 |
| ZNF557   | -0.078 | 4.622E-01 | 5.628E-01 |
| PGBD1    | -0.078 | 7.116E-01 | 6.498E-01 |
| DISC1    | -0.078 | 7.185E-01 | 7.254E-01 |
| PSMC6    | -0.078 | 2.288E-01 | 8.554E-01 |
| SLC25A15 | -0.078 | 6.104E-01 | 5.117E-01 |
| CCDC61   | -0.078 | 5.902E-01 | 5.997E-01 |
| PNPLA7   | -0.078 | 7.441E-01 | 8.503E-01 |
| PAIP2    | -0.078 | 3.080E-01 | 4.645E-01 |
| SDK2     | -0.078 | 8.635E-01 | 5.524E-01 |
| CEP95    | -0.078 | 4.756E-01 | 6.478E-01 |
| ICK      | -0.078 | 5.210E-01 | 7.979E-01 |
| DNM2     | -0.078 | 5.851E-01 | 7.666E-01 |
| ANKRD52  | -0.078 | 4.871E-01 | 5.927E-01 |
| PTBP1    | -0.078 | 1.417E-01 | 5.603E-01 |
| C20orf27 | -0.078 | 5.823E-01 | 5.939E-01 |
| UBE2J2   | -0.078 | 3.496E-01 | 8.742E-01 |
| S100A7L2 | -0.078 | NA        | 5.611E-01 |
| CLRN2    | -0.078 | NA        | 5.385E-01 |
| OR4K14   | -0.078 | NA        | 7.547E-01 |
| TIMM9    | -0.078 | 4.107E-01 | 6.676E-01 |
| C11orf49 | -0.078 | 4.997E-01 | 5.590E-01 |
| PLXNA1   | -0.078 | 6.047E-01 | 5.055E-01 |
| ZC3HAV1  | -0.078 | 4.207E-01 | 6.247E-01 |
| ANKRD54  | -0.078 | 4.381E-01 | 8.149E-01 |
| MAPK11   | -0.078 | 7.214E-01 | 8.732E-01 |
| SAG      | -0.078 | 8.675E-01 | 6.966E-01 |
| PCYT2    | -0.078 | 6.351E-01 | 7.598E-01 |
| HDHD2    | -0.078 | 4.841E-01 | 7.705E-01 |
| PEX3     | -0.078 | 4.835E-01 | 5.576E-01 |
| HECA     | -0.078 | 4.261E-01 | 6.284E-01 |
| TRIM39   | -0.078 | 3.326E-01 | 5.993E-01 |

|          |        |           |           |
|----------|--------|-----------|-----------|
| SLC25A37 | -0.078 | 5.845E-01 | 5.096E-01 |
| MRM3     | -0.078 | 5.348E-01 | 9.493E-01 |
| ZNF136   | -0.078 | 4.511E-01 | 5.095E-01 |
| CYP20A1  | -0.078 | 3.504E-01 | 5.398E-01 |
| IPO5     | -0.078 | 4.306E-01 | 7.990E-01 |
| MLKL     | -0.078 | 6.430E-01 | 6.003E-01 |
| WASHC1   | -0.078 | 6.738E-01 | 8.266E-01 |
| ETFA     | -0.078 | 4.028E-01 | 6.984E-01 |
| ARHGAP45 | -0.079 | 7.155E-01 | 8.498E-01 |
| KCTD9    | -0.079 | 5.943E-01 | 8.710E-01 |
| LRRC37B  | -0.079 | 5.433E-01 | 7.273E-01 |
| RBBP8NL  | -0.079 | 8.317E-01 | 8.354E-01 |
| XAB2     | -0.079 | 4.674E-01 | 7.595E-01 |
| TCTN1    | -0.079 | 5.749E-01 | 8.241E-01 |
| THAP12   | -0.079 | 4.066E-01 | 7.205E-01 |
| MIR4753  | -0.079 | NA        | 6.731E-01 |
| C1orf131 | -0.079 | 3.139E-01 | 9.299E-01 |
| TMEM35A  | -0.079 | 8.831E-01 | 9.135E-01 |
| IKBKB    | -0.079 | 5.469E-01 | 5.051E-01 |
| BTBD9    | -0.079 | 4.216E-01 | 5.541E-01 |
| SIRT5    | -0.079 | 4.794E-01 | 6.099E-01 |
| RABL2A   | -0.079 | 5.607E-01 | 5.341E-01 |
| MVK      | -0.079 | 6.288E-01 | 6.082E-01 |
| NOL7     | -0.079 | 5.032E-01 | 6.404E-01 |
| POMGNT1  | -0.079 | 4.292E-01 | 8.740E-01 |
| NDUFB1   | -0.079 | 5.415E-01 | 8.459E-01 |
| SHPRH    | -0.079 | 6.977E-01 | 5.362E-01 |
| MIR6747  | -0.079 | 9.003E-01 | 7.858E-01 |
| PPP1R3C  | -0.079 | 8.534E-01 | 8.121E-01 |
| OR56B1   | -0.079 | NA        | 6.723E-01 |
| CEP120   | -0.079 | 3.745E-01 | 6.807E-01 |
| ATP9B    | -0.079 | 4.412E-01 | 7.986E-01 |
| YTHDF3   | -0.079 | 3.215E-01 | 8.076E-01 |
| GRAMD4   | -0.079 | 6.189E-01 | 5.077E-01 |
| Z84492.1 | -0.079 | 9.070E-01 | 7.474E-01 |
| SNRNP48  | -0.079 | 4.120E-01 | 7.916E-01 |
| RPL26L1  | -0.079 | 4.432E-01 | 6.606E-01 |
| RRP7A    | -0.079 | 5.851E-01 | 5.410E-01 |
| ALDH6A1  | -0.079 | 5.753E-01 | 9.629E-01 |
| LAIR1    | -0.079 | 8.176E-01 | 9.877E-01 |
| SLC36A1  | -0.079 | 5.438E-01 | 9.869E-01 |
| MIR4632  | -0.079 | NA        | 9.838E-01 |
| GGT7     | -0.079 | 6.927E-01 | 7.868E-01 |
| MLNR     | -0.079 | 8.994E-01 | 9.469E-01 |
| PRMT5    | -0.079 | 5.316E-01 | 8.871E-01 |
| ZNF554   | -0.079 | 5.753E-01 | 5.166E-01 |
| C15orf52 | -0.079 | 7.991E-01 | 7.926E-01 |
| FRAT2    | -0.079 | 5.753E-01 | 7.148E-01 |
| ZNF646   | -0.080 | 3.379E-01 | 5.220E-01 |
| RARS2    | -0.080 | 2.278E-01 | 9.652E-01 |

|            |        |           |           |
|------------|--------|-----------|-----------|
| C11orf53   | -0.080 | 8.759E-01 | 7.582E-01 |
| OR5H2      | -0.080 | NA        | 5.433E-01 |
| KRTAP12-2  | -0.080 | NA        | 7.477E-01 |
| MIR610     | -0.080 | NA        | 6.161E-01 |
| MIR5096    | -0.080 | NA        | 6.990E-01 |
| OR5AK2     | -0.080 | NA        | 5.242E-01 |
| AL672142.1 | -0.080 | NA        | 5.955E-01 |
| DEFB103B   | -0.080 | NA        | 8.401E-01 |
| METTL14    | -0.080 | 2.390E-01 | 9.643E-01 |
| SLC22A12   | -0.080 | NA        | 4.620E-01 |
| C5orf24    | -0.080 | 3.721E-01 | 6.231E-01 |
| TSSC4      | -0.080 | 5.146E-01 | 5.588E-01 |
| ZNF225     | -0.080 | 5.204E-01 | 4.290E-01 |
| SSH1       | -0.080 | 4.729E-01 | 6.737E-01 |
| AMBP       | -0.080 | 9.095E-01 | 8.873E-01 |
| PMPCB      | -0.080 | 2.356E-01 | 7.220E-01 |
| UBE2C      | -0.080 | 6.716E-01 | 4.025E-01 |
| TMEM68     | -0.080 | 4.631E-01 | 6.683E-01 |
| RPS26      | -0.080 | 6.219E-01 | 7.062E-01 |
| WDR59      | -0.080 | 3.793E-01 | 6.258E-01 |
| TMEM262    | -0.080 | 5.968E-01 | 8.372E-01 |
| B3GAT1     | -0.080 | 8.878E-01 | 6.356E-01 |
| HELB       | -0.080 | 6.181E-01 | 5.191E-01 |
| AC003002.3 | -0.080 | 8.223E-01 | 6.761E-01 |
| ZNF770     | -0.080 | 7.372E-01 | 6.011E-01 |
| KIF13B     | -0.080 | 6.155E-01 | 5.523E-01 |
| RBMXL3     | -0.080 | NA        | 5.817E-01 |
| HBZ        | -0.080 | NA        | 7.956E-01 |
| FAM160A2   | -0.080 | 2.931E-01 | 5.249E-01 |
| ANKRD17    | -0.080 | 5.018E-01 | 4.954E-01 |
| NAGPA      | -0.080 | 4.470E-01 | 5.780E-01 |
| LAD1       | -0.080 | 7.385E-01 | 5.392E-01 |
| ZNF337     | -0.080 | 6.927E-01 | 6.353E-01 |
| GNG5       | -0.080 | 3.348E-01 | 5.688E-01 |
| UBALD1     | -0.080 | 4.606E-01 | 7.649E-01 |
| SETD1A     | -0.080 | 2.051E-01 | 5.724E-01 |
| NDST4      | -0.080 | 9.133E-01 | 5.143E-01 |
| ATG14      | -0.080 | 3.228E-01 | 5.706E-01 |
| DYNLT1     | -0.080 | 3.708E-01 | 7.382E-01 |
| KRT32      | -0.080 | 9.017E-01 | 4.933E-01 |
| KNL1       | -0.080 | 6.583E-01 | 9.089E-01 |
| PGAM4      | -0.080 | 7.843E-01 | 6.334E-01 |
| ZNF316     | -0.080 | 5.246E-01 | 8.076E-01 |
| ACOT13     | -0.080 | 5.398E-01 | 5.326E-01 |
| PSMD6      | -0.081 | 3.395E-01 | 5.212E-01 |
| ACHE       | -0.081 | 8.403E-01 | 5.538E-01 |
| TMEM126A   | -0.081 | 4.040E-01 | 7.820E-01 |
| FOXL1      | -0.081 | 8.515E-01 | 4.719E-01 |
| SNX6       | -0.081 | 4.403E-01 | 5.124E-01 |
| PGAM5      | -0.081 | 4.257E-01 | 5.356E-01 |

|            |        |           |           |
|------------|--------|-----------|-----------|
| PPP1CA     | -0.081 | 4.360E-01 | 3.886E-01 |
| DPH6       | -0.081 | 4.871E-01 | 5.941E-01 |
| BICD1      | -0.081 | 6.181E-01 | 6.511E-01 |
| CMBL       | -0.081 | 7.855E-01 | 6.952E-01 |
| RGPD2      | -0.081 | 8.582E-01 | 7.725E-01 |
| TMEM176A   | -0.081 | 8.050E-01 | 6.225E-01 |
| GTF2H4     | -0.081 | 4.500E-01 | 7.114E-01 |
| AL109811.4 | -0.081 | 8.521E-01 | 6.918E-01 |
| NAA40      | -0.081 | 4.278E-01 | 8.586E-01 |
| MIR6826    | -0.081 | NA        | 4.309E-01 |
| UBE3B      | -0.081 | 2.414E-01 | 6.213E-01 |
| EFHD2      | -0.081 | 5.737E-01 | 9.596E-01 |
| OR10H1     | -0.081 | 8.908E-01 | 5.887E-01 |
| HLA-C      | -0.081 | 7.149E-01 | 3.890E-01 |
| MIR8076    | -0.081 | NA        | 7.779E-01 |
| MIR6854    | -0.081 | NA        | 7.076E-01 |
| MYF5       | -0.081 | NA        | 3.999E-01 |
| MRFAP1     | -0.081 | 3.182E-01 | 8.050E-01 |
| C7orf43    | -0.081 | 3.708E-01 | 7.280E-01 |
| SUB1       | -0.081 | 4.682E-01 | 6.017E-01 |
| CELA3A     | -0.081 | 9.380E-01 | 5.020E-01 |
| GATB       | -0.081 | 4.628E-01 | 6.394E-01 |
| C5orf58    | -0.081 | 8.703E-01 | 6.002E-01 |
| CRYBA1     | -0.081 | 8.041E-01 | 5.445E-01 |
| FERMT1     | -0.081 | 7.285E-01 | 4.885E-01 |
| NOVA2      | -0.081 | 6.864E-01 | 6.985E-01 |
| KLHL29     | -0.081 | 7.879E-01 | 6.367E-01 |
| ZSCAN26    | -0.081 | 4.403E-01 | 4.776E-01 |
| KCNT1      | -0.081 | 8.192E-01 | 5.453E-01 |
| TBL3       | -0.081 | 3.968E-01 | 4.283E-01 |
| CMAS       | -0.081 | 4.256E-01 | 8.526E-01 |
| EDF1       | -0.081 | 5.289E-01 | 7.446E-01 |
| SH2B1      | -0.081 | 5.559E-01 | 5.462E-01 |
| GNL2       | -0.081 | 3.545E-01 | 8.496E-01 |
| FFAR4      | -0.081 | 8.222E-01 | 8.949E-01 |
| HES2       | -0.081 | 8.693E-01 | 9.711E-01 |
| ACACB      | -0.081 | 7.396E-01 | 7.067E-01 |
| FZR1       | -0.081 | 3.438E-01 | 5.100E-01 |
| CDK5RAP3   | -0.081 | 5.364E-01 | 5.312E-01 |
| FUBP1      | -0.081 | 3.154E-01 | 4.980E-01 |
| ABHD18     | -0.082 | 3.317E-01 | 7.657E-01 |
| AQR        | -0.082 | 3.404E-01 | 5.375E-01 |
| GART       | -0.082 | 4.244E-01 | 4.677E-01 |
| HSD17B4    | -0.082 | 4.591E-01 | 8.531E-01 |
| TERB1      | -0.082 | 8.272E-01 | 6.592E-01 |
| HELQ       | -0.082 | 2.051E-01 | 6.084E-01 |
| MIR6814    | -0.082 | 8.852E-01 | 5.385E-01 |
| VAR52      | -0.082 | 4.976E-01 | 5.681E-01 |
| EIF2B2     | -0.082 | 3.620E-01 | 6.001E-01 |
| LNPEP      | -0.082 | 4.798E-01 | 7.581E-01 |

|            |        |           |           |
|------------|--------|-----------|-----------|
| DOCK8      | -0.082 | 7.322E-01 | 7.228E-01 |
| RASSF7     | -0.082 | 6.443E-01 | 5.111E-01 |
| MIR3666    | -0.082 | NA        | 5.015E-01 |
| GPR89B     | -0.082 | 5.381E-01 | 4.770E-01 |
| KCNH7      | -0.082 | 8.735E-01 | 5.377E-01 |
| FOXN1      | -0.082 | 8.806E-01 | 6.357E-01 |
| FAM83C     | -0.082 | 8.739E-01 | 7.367E-01 |
| HMG20B     | -0.082 | 4.895E-01 | 8.082E-01 |
| SHMT2      | -0.082 | 4.976E-01 | 8.565E-01 |
| MEF2C      | -0.082 | 7.240E-01 | 8.333E-01 |
| TNFRSF21   | -0.082 | 7.397E-01 | 9.560E-01 |
| POLR2A     | -0.082 | 4.560E-01 | 7.461E-01 |
| CALCA      | -0.082 | 9.070E-01 | 8.774E-01 |
| MAP3K21    | -0.082 | 7.378E-01 | 9.892E-01 |
| MARVELD2   | -0.082 | 5.631E-01 | 9.848E-01 |
| NOL8       | -0.082 | 3.576E-01 | 9.324E-01 |
| RABL2B     | -0.082 | 3.976E-01 | 5.731E-01 |
| TMPO       | -0.082 | 5.434E-01 | 8.707E-01 |
| CEP126     | -0.082 | 7.295E-01 | 6.704E-01 |
| MSN        | -0.082 | 7.764E-01 | 6.934E-01 |
| MED18      | -0.082 | 4.193E-01 | 8.921E-01 |
| VCPKMT     | -0.082 | 3.268E-01 | 6.625E-01 |
| HEXIM1     | -0.082 | 5.146E-01 | 8.234E-01 |
| GPX4       | -0.082 | 5.438E-01 | 7.267E-01 |
| CPEB2      | -0.082 | 6.599E-01 | 8.770E-01 |
| PTCD3      | -0.082 | 3.558E-01 | 5.043E-01 |
| ATXN1      | -0.082 | 6.807E-01 | 8.560E-01 |
| MIR6737    | -0.082 | NA        | 5.797E-01 |
| LRRC30     | -0.082 | NA        | 4.562E-01 |
| OR13C2     | -0.082 | NA        | 7.116E-01 |
| AC020909.1 | -0.082 | NA        | 9.014E-01 |
| OR5AN1     | -0.082 | NA        | 4.579E-01 |
| MIR4478    | -0.082 | NA        | 8.533E-01 |
| SNX5       | -0.082 | 3.610E-01 | 6.843E-01 |
| DLGAP5     | -0.082 | 6.877E-01 | 4.753E-01 |
| PPP2R2A    | -0.082 | 4.523E-01 | 6.604E-01 |
| TRIAP1     | -0.083 | 3.525E-01 | 5.292E-01 |
| KIAA1524   | -0.083 | 6.367E-01 | 6.105E-01 |
| RAB39B     | -0.083 | 8.289E-01 | 5.718E-01 |
| MPND       | -0.083 | 5.976E-01 | 7.464E-01 |
| PKN2       | -0.083 | 4.476E-01 | 7.763E-01 |
| CDCA2      | -0.083 | 6.805E-01 | 8.300E-01 |
| CC2D2B     | -0.083 | 7.475E-01 | 9.021E-01 |
| TMEM33     | -0.083 | 3.879E-01 | 8.539E-01 |
| IPO8       | -0.083 | 3.502E-01 | 4.857E-01 |
| MMP24-AS1  | -0.083 | 6.296E-01 | 7.364E-01 |
| GUCD1      | -0.083 | 2.819E-01 | 5.406E-01 |
| CNST       | -0.083 | 3.614E-01 | 5.032E-01 |
| MESDC1     | -0.083 | 4.366E-01 | 9.207E-01 |
| PSMA3      | -0.083 | 3.536E-01 | 6.213E-01 |

|          |        |           |           |
|----------|--------|-----------|-----------|
| STK38L   | -0.083 | 5.818E-01 | 4.874E-01 |
| EML2     | -0.083 | 5.847E-01 | 9.088E-01 |
| ZBTB22   | -0.083 | 3.356E-01 | 8.273E-01 |
| RSBN1    | -0.083 | 3.330E-01 | 3.970E-01 |
| RSRC2    | -0.083 | 2.396E-01 | 4.665E-01 |
| FBL      | -0.083 | 5.583E-01 | 6.523E-01 |
| FAM227A  | -0.083 | 7.545E-01 | 9.731E-01 |
| SLC5A8   | -0.083 | 9.094E-01 | 7.466E-01 |
| VPS33A   | -0.083 | 2.581E-01 | 8.978E-01 |
| NXPE2    | -0.083 | 8.896E-01 | 4.410E-01 |
| RBPJ     | -0.083 | 3.751E-01 | 5.108E-01 |
| CDC16    | -0.083 | 2.914E-01 | 6.343E-01 |
| PPA2     | -0.083 | 3.618E-01 | 3.426E-01 |
| DGCR2    | -0.083 | 3.628E-01 | 7.051E-01 |
| AGMAT    | -0.083 | 6.985E-01 | 6.655E-01 |
| CSK      | -0.083 | 3.645E-01 | 5.220E-01 |
| SLC35A1  | -0.083 | 5.045E-01 | 9.719E-01 |
| NIPSNAP1 | -0.083 | 5.480E-01 | 7.312E-01 |
| CHAMP1   | -0.083 | 5.311E-01 | 9.826E-01 |
| SNCG     | -0.083 | 8.421E-01 | 5.514E-01 |
| TMED8    | -0.083 | 4.144E-01 | 5.993E-01 |
| PTPRJ    | -0.083 | 7.063E-01 | 5.722E-01 |
| MIR8087  | -0.083 | NA        | 4.304E-01 |
| ARFGEF1  | -0.083 | 4.709E-01 | 8.995E-01 |
| MSX1     | -0.083 | 7.806E-01 | 7.696E-01 |
| CLEC9A   | -0.083 | 8.360E-01 | 8.234E-01 |
| IDH3G    | -0.083 | 4.151E-01 | 7.008E-01 |
| MARCKSL1 | -0.083 | 6.708E-01 | 7.153E-01 |
| WDR83OS  | -0.083 | 3.621E-01 | 8.061E-01 |
| EVX1     | -0.083 | 8.911E-01 | 4.242E-01 |
| LRP8     | -0.083 | 7.535E-01 | 6.232E-01 |
| PRELID1  | -0.084 | 3.502E-01 | 5.445E-01 |
| TMEM202  | -0.084 | NA        | 4.762E-01 |
| CFAP161  | -0.084 | 7.821E-01 | 5.839E-01 |
| MIR4473  | -0.084 | NA        | 8.651E-01 |
| ZFYVE26  | -0.084 | 4.261E-01 | 7.335E-01 |
| LILRB3   | -0.084 | 7.782E-01 | 5.433E-01 |
| AKR7A3   | -0.084 | 7.545E-01 | 9.493E-01 |
| MIR4286  | -0.084 | NA        | 7.439E-01 |
| TNIP2    | -0.084 | 4.156E-01 | 6.393E-01 |
| MCF2L2   | -0.084 | 7.042E-01 | 5.045E-01 |
| MIR6069  | -0.084 | NA        | 5.290E-01 |
| MRPL34   | -0.084 | 4.053E-01 | 4.755E-01 |
| NDST1    | -0.084 | 5.579E-01 | 6.697E-01 |
| UTP6     | -0.084 | 4.076E-01 | 6.923E-01 |
| MRPS22   | -0.084 | 2.551E-01 | 4.253E-01 |
| C1orf226 | -0.084 | 7.383E-01 | 7.041E-01 |
| EIF2A    | -0.084 | 2.542E-01 | 9.015E-01 |
| ZNF641   | -0.084 | 4.278E-01 | 6.145E-01 |
| SNU13    | -0.084 | 3.258E-01 | 9.813E-01 |

|            |        |           |           |
|------------|--------|-----------|-----------|
| RPS19BP1   | -0.084 | 5.025E-01 | 6.724E-01 |
| AC093423.3 | -0.084 | NA        | 5.518E-01 |
| DLEC1      | -0.084 | 7.782E-01 | 8.383E-01 |
| CASQ1      | -0.084 | 8.720E-01 | 9.388E-01 |
| LAT2       | -0.084 | 7.596E-01 | 4.293E-01 |
| ERH        | -0.084 | 2.924E-01 | 7.486E-01 |
| UGT3A2     | -0.084 | 8.672E-01 | 4.857E-01 |
| COPE       | -0.084 | 3.911E-01 | 7.195E-01 |
| EFCAB6     | -0.084 | 7.793E-01 | 7.063E-01 |
| PPIG       | -0.084 | 2.348E-01 | 5.493E-01 |
| CELA2B     | -0.084 | 7.970E-01 | 7.985E-01 |
| NOP10      | -0.084 | 4.526E-01 | 7.848E-01 |
| MRPS6      | -0.084 | 4.115E-01 | 3.951E-01 |
| AGO4       | -0.084 | 3.903E-01 | 5.185E-01 |
| SSNA1      | -0.084 | 4.705E-01 | 5.786E-01 |
| SRRT       | -0.084 | 1.961E-01 | 5.691E-01 |
| SPAG11A    | -0.084 | NA        | 6.760E-01 |
| ZNF284     | -0.084 | 5.304E-01 | 5.116E-01 |
| ZNF85      | -0.084 | 6.781E-01 | 8.458E-01 |
| TMEM205    | -0.084 | 5.984E-01 | 5.336E-01 |
| NDUFAF5    | -0.085 | 3.410E-01 | 9.898E-01 |
| RABL6      | -0.085 | 4.582E-01 | 9.898E-01 |
| FGFR1OP2   | -0.085 | 3.022E-01 | 9.898E-01 |
| C1orf50    | -0.085 | 4.412E-01 | 9.889E-01 |
| MAD2L1     | -0.085 | 6.288E-01 | 9.887E-01 |
| AGL        | -0.085 | 5.032E-01 | 9.873E-01 |
| WDR6       | -0.085 | 4.652E-01 | 3.227E-01 |
| RAD51AP1   | -0.085 | 6.557E-01 | 6.599E-01 |
| NKX2-3     | -0.085 | 9.128E-01 | 8.148E-01 |
| SLC22A11   | -0.085 | 8.854E-01 | 8.252E-01 |
| BYSL       | -0.085 | 4.207E-01 | 7.857E-01 |
| HSPA9      | -0.085 | 3.327E-01 | 7.736E-01 |
| CSNK1G3    | -0.085 | 3.321E-01 | 7.801E-01 |
| HLA-DOA    | -0.085 | 8.257E-01 | 5.574E-01 |
| SEC14L2    | -0.085 | 7.447E-01 | 8.412E-01 |
| SART3      | -0.085 | 1.717E-01 | 7.839E-01 |
| FBXO21     | -0.085 | 3.735E-01 | 6.265E-01 |
| CHIA       | -0.085 | 9.230E-01 | 4.525E-01 |
| EXOSC7     | -0.085 | 3.600E-01 | 6.451E-01 |
| URB2       | -0.085 | 4.727E-01 | 3.423E-01 |
| ERMN       | -0.085 | 8.156E-01 | 8.271E-01 |
| CMTM2      | -0.085 | 7.322E-01 | 5.328E-01 |
| MIR4324    | -0.085 | 9.068E-01 | 5.945E-01 |
| FAM200A    | -0.085 | 3.504E-01 | 5.550E-01 |
| MTFR1      | -0.085 | 4.418E-01 | 4.703E-01 |
| CHCHD2     | -0.085 | 4.239E-01 | 6.993E-01 |
| HNRNPCL4   | -0.085 | NA        | 8.736E-01 |
| MIR4710    | -0.085 | NA        | 9.583E-01 |
| MIR4646    | -0.085 | NA        | 4.481E-01 |
| KRTAP10-10 | -0.085 | NA        | 5.794E-01 |



|            |        |           |           |
|------------|--------|-----------|-----------|
| OR9I1      | -0.085 | NA        | 5.205E-01 |
| MBD3L3     | -0.085 | NA        | 5.588E-01 |
| AC010646.1 | -0.085 | NA        | 8.571E-01 |
| AC078927.1 | -0.085 | 8.780E-01 | 5.972E-01 |
| UNC5B      | -0.085 | 6.635E-01 | 8.446E-01 |
| PSPC1      | -0.085 | 3.340E-01 | 7.909E-01 |
| DDA1       | -0.085 | 2.615E-01 | 4.437E-01 |
| P4HA1      | -0.085 | 6.202E-01 | 5.973E-01 |
| CENPH      | -0.085 | 5.675E-01 | 8.175E-01 |
| THOC1      | -0.085 | 4.433E-01 | 9.352E-01 |
| AC023055.1 | -0.085 | 5.299E-01 | 4.369E-01 |
| C4orf32    | -0.085 | 6.414E-01 | 4.611E-01 |
| ATP5F1     | -0.085 | 2.288E-01 | 8.326E-01 |
| ADGRF2     | -0.085 | 8.713E-01 | 7.036E-01 |
| RNF113A    | -0.086 | 4.027E-01 | 5.407E-01 |
| FAF2       | -0.086 | 2.038E-01 | 5.185E-01 |
| KIF20A     | -0.086 | 6.419E-01 | 6.454E-01 |
| 3PTY2D1-AS | -0.086 | 5.986E-01 | 8.424E-01 |
| RBPMS      | -0.086 | 6.942E-01 | 7.091E-01 |
| IPPK       | -0.086 | 7.172E-01 | 8.193E-01 |
| FIGN       | -0.086 | 7.867E-01 | 8.489E-01 |
| C9orf172   | -0.086 | 6.680E-01 | 7.885E-01 |
| ELP2       | -0.086 | 3.225E-01 | 7.069E-01 |
| CDK4       | -0.086 | 5.259E-01 | 5.482E-01 |
| GSE1       | -0.086 | 6.942E-01 | 8.325E-01 |
| SSB        | -0.086 | 2.498E-01 | 4.053E-01 |
| GPM6B      | -0.086 | 7.251E-01 | 3.073E-01 |
| CFAP61     | -0.086 | 7.847E-01 | 4.520E-01 |
| FANCB      | -0.086 | 6.165E-01 | 5.623E-01 |
| FAM109A    | -0.086 | 5.441E-01 | 5.367E-01 |
| AC009163.2 | -0.086 | NA        | 5.752E-01 |
| HIST1H4F   | -0.086 | 9.349E-01 | 8.052E-01 |
| RBMXL1     | -0.086 | 4.008E-01 | 5.501E-01 |
| URAD       | -0.086 | NA        | 4.153E-01 |
| B3GAT2     | -0.086 | 7.154E-01 | 6.304E-01 |
| TSC2       | -0.086 | 2.312E-01 | 9.745E-01 |
| RPTOR      | -0.086 | 2.509E-01 | 5.961E-01 |
| PPP1R35    | -0.086 | 5.484E-01 | 6.296E-01 |
| TRAPPC6B   | -0.086 | 2.203E-01 | 7.993E-01 |
| TBRG1      | -0.086 | 3.268E-01 | 4.990E-01 |
| RASA2      | -0.086 | 4.076E-01 | 5.560E-01 |
| AXIN1      | -0.086 | 2.511E-01 | 5.133E-01 |
| TMPRSS6    | -0.086 | 7.951E-01 | 5.800E-01 |
| PYCR3      | -0.086 | 5.460E-01 | 5.706E-01 |
| GRM2       | -0.086 | 7.715E-01 | 6.179E-01 |
| B4GALT7    | -0.086 | 4.087E-01 | 9.433E-01 |
| MIR5692C2  | -0.086 | NA        | 6.307E-01 |
| PI4KB      | -0.086 | 3.861E-01 | 4.511E-01 |
| PRICKLE4   | -0.086 | 7.193E-01 | 4.856E-01 |
| BRD1       | -0.086 | 3.193E-01 | 7.207E-01 |

|            |        |           |           |
|------------|--------|-----------|-----------|
| KRT7       | -0.086 | 8.317E-01 | 9.175E-01 |
| TTC31      | -0.086 | 2.445E-01 | 5.637E-01 |
| RBM45      | -0.086 | 9.259E-02 | 4.798E-01 |
| C1RL       | -0.087 | 4.986E-01 | 5.058E-01 |
| SLC26A1    | -0.087 | 6.855E-01 | 7.253E-01 |
| FRMD6      | -0.087 | 6.977E-01 | 3.774E-01 |
| NSUN7      | -0.087 | 7.635E-01 | 6.991E-01 |
| FAM186A    | -0.087 | 7.397E-01 | 4.614E-01 |
| LIMK2      | -0.087 | 5.348E-01 | 5.772E-01 |
| WARS2      | -0.087 | 2.708E-01 | 4.807E-01 |
| NMRK1      | -0.087 | 6.018E-01 | 5.506E-01 |
| AL358075.4 | -0.087 | NA        | 8.066E-01 |
| DEFB113    | -0.087 | NA        | 6.059E-01 |
| DEFB116    | -0.087 | NA        | 3.573E-01 |
| MIR510     | -0.087 | NA        | 3.464E-01 |
| MIR512-1   | -0.087 | NA        | 4.435E-01 |
| MIR516B2   | -0.087 | NA        | 5.704E-01 |
| MIR5591    | -0.087 | NA        | 8.981E-01 |
| MIR7160    | -0.087 | NA        | 4.990E-01 |
| MIR920     | -0.087 | NA        | 8.661E-01 |
| OR10C1     | -0.087 | NA        | 5.818E-01 |
| OR2T12     | -0.087 | NA        | 5.843E-01 |
| OR51T1     | -0.087 | NA        | 9.776E-01 |
| VN1R4      | -0.087 | NA        | 9.788E-01 |
| MIR668     | -0.087 | NA        | 9.835E-01 |
| MIR8082    | -0.087 | NA        | 5.122E-01 |
| OR6Y1      | -0.087 | NA        | 6.060E-01 |
| OR8I2      | -0.087 | NA        | 4.839E-01 |
| CHKA       | -0.087 | 6.663E-01 | 4.760E-01 |
| CDK17      | -0.087 | 3.884E-01 | 7.924E-01 |
| PTPN12     | -0.087 | 5.293E-01 | 4.055E-01 |
| ZBTB3      | -0.087 | 4.368E-01 | 8.130E-01 |
| STN1       | -0.087 | 5.341E-01 | 5.216E-01 |
| MFSD5      | -0.087 | 4.801E-01 | 7.164E-01 |
| SLFN13     | -0.087 | 8.096E-01 | 7.014E-01 |
| FKBP11     | -0.087 | 5.943E-01 | 4.265E-01 |
| WASF1      | -0.087 | 6.871E-01 | 7.790E-01 |
| AHDC1      | -0.087 | 4.980E-01 | 6.952E-01 |
| PNPLA6     | -0.087 | 3.892E-01 | 5.688E-01 |
| PSMA6      | -0.087 | 4.109E-01 | 5.534E-01 |
| DDX3Y      | -0.087 | 8.880E-01 | 6.653E-01 |
| CAND1      | -0.087 | 5.449E-01 | 4.227E-01 |
| DDB2       | -0.087 | 5.474E-01 | 5.084E-01 |
| SH2D3C     | -0.087 | 6.499E-01 | 7.604E-01 |
| AP1M1      | -0.087 | 2.772E-01 | 4.121E-01 |
| SSFA2      | -0.087 | 6.769E-01 | 8.561E-01 |
| GM2A       | -0.087 | 6.278E-01 | 7.330E-01 |
| GNAS       | -0.087 | 3.841E-01 | 7.896E-01 |
| CWC15      | -0.087 | 3.356E-01 | 9.503E-01 |
| CX3CR1     | -0.087 | 7.922E-01 | 6.428E-01 |

|            |        |           |           |
|------------|--------|-----------|-----------|
| GBE1       | -0.087 | 5.530E-01 | 5.292E-01 |
| ZNF788     | -0.087 | 7.508E-01 | 9.308E-01 |
| MIR6859-4  | -0.087 | 8.858E-01 | 5.769E-01 |
| INO80B     | -0.087 | 5.248E-01 | 3.690E-01 |
| POP1       | -0.087 | 5.516E-01 | 7.939E-01 |
| MBD1       | -0.087 | 3.227E-01 | 6.327E-01 |
| DAZAP1     | -0.087 | 1.988E-01 | 8.627E-01 |
| CWC25      | -0.087 | 3.194E-01 | 5.076E-01 |
| CGB7       | -0.088 | 7.883E-01 | 8.057E-01 |
| ARID4A     | -0.088 | 3.558E-01 | 8.034E-01 |
| CDK9       | -0.088 | 2.873E-01 | 7.940E-01 |
| FANCM      | -0.088 | 4.381E-01 | 5.588E-01 |
| ZNF419     | -0.088 | 4.906E-01 | 5.631E-01 |
| METTL16    | -0.088 | 3.317E-01 | 5.392E-01 |
| ATP1B3     | -0.088 | 5.948E-01 | 9.890E-01 |
| RCOR1      | -0.088 | 5.146E-01 | 9.890E-01 |
| ATXN10     | -0.088 | 3.189E-01 | 9.890E-01 |
| SLC25A2    | -0.088 | 7.759E-01 | 9.890E-01 |
| CWC27      | -0.088 | 2.464E-01 | 9.890E-01 |
| NBPF12     | -0.088 | 5.965E-01 | 9.890E-01 |
| NF625-ZNF2 | -0.088 | 7.240E-01 | 9.890E-01 |
| SMO        | -0.088 | 7.770E-01 | 8.322E-01 |
| ZSWIM1     | -0.088 | 3.588E-01 | 6.639E-01 |
| VDAC1      | -0.088 | 3.686E-01 | 2.976E-01 |
| ME1        | -0.088 | 7.722E-01 | 8.567E-01 |
| MIR588     | -0.088 | NA        | 5.913E-01 |
| MIR4323    | -0.088 | NA        | 5.861E-01 |
| EIF3H      | -0.088 | 3.479E-01 | 3.828E-01 |
| SBNO1      | -0.088 | 3.482E-01 | 6.174E-01 |
| HOXA4      | -0.088 | 6.367E-01 | 3.791E-01 |
| TNRC6A     | -0.088 | 3.906E-01 | 4.362E-01 |
| CDT1       | -0.088 | 6.414E-01 | 6.444E-01 |
| SMIM10L1   | -0.088 | 3.628E-01 | 4.106E-01 |
| TATDN3     | -0.088 | 2.648E-01 | 8.528E-01 |
| HSPB11     | -0.088 | 4.847E-01 | 6.392E-01 |
| PSMG4      | -0.088 | 5.027E-01 | 6.705E-01 |
| ARHGAP42   | -0.088 | 6.781E-01 | 6.192E-01 |
| ZFYVE16    | -0.088 | 3.364E-01 | 6.593E-01 |
| STMN4      | -0.088 | 8.822E-01 | 9.626E-01 |
| FAM193A    | -0.088 | 2.057E-01 | 7.589E-01 |
| VPS51      | -0.088 | 3.045E-01 | 4.373E-01 |
| MIR181D    | -0.088 | NA        | 5.461E-01 |
| C14orf93   | -0.088 | 3.189E-01 | 5.323E-01 |
| HGS        | -0.088 | 2.989E-01 | 8.753E-01 |
| HSPH1      | -0.088 | 5.274E-01 | 3.573E-01 |
| WIPF1      | -0.088 | 7.240E-01 | 5.835E-01 |
| ACTR6      | -0.088 | 2.921E-01 | 4.087E-01 |
| CD1B       | -0.088 | 8.534E-01 | 7.238E-01 |
| ITPK1      | -0.088 | 5.070E-01 | 6.057E-01 |
| BLM        | -0.088 | 5.284E-01 | 5.128E-01 |

|            |        |           |           |
|------------|--------|-----------|-----------|
| RRP9       | -0.088 | 3.977E-01 | 9.232E-01 |
| XRCC5      | -0.088 | 2.603E-01 | 6.819E-01 |
| SCUBE3     | -0.088 | 8.015E-01 | 4.119E-01 |
| ETV6       | -0.088 | 4.359E-01 | 3.617E-01 |
| C12orf60   | -0.089 | 5.676E-01 | 4.483E-01 |
| PLEC       | -0.089 | 6.180E-01 | 4.104E-01 |
| ZC3H13     | -0.089 | 3.874E-01 | 6.815E-01 |
| RPL23A     | -0.089 | 4.945E-01 | 6.956E-01 |
| DTWD1      | -0.089 | 2.872E-01 | 4.645E-01 |
| DDIT4      | -0.089 | 7.559E-01 | 8.360E-01 |
| USP19      | -0.089 | 2.446E-01 | 4.683E-01 |
| NBPF11     | -0.089 | 6.743E-01 | 8.234E-01 |
| CTC1       | -0.089 | 4.568E-01 | 5.099E-01 |
| CSNK1G2    | -0.089 | 3.231E-01 | 6.972E-01 |
| IKBKE      | -0.089 | 5.489E-01 | 4.634E-01 |
| AP3S1      | -0.089 | 4.734E-01 | 6.625E-01 |
| SNAPC4     | -0.089 | 3.964E-01 | 7.256E-01 |
| POLR2J     | -0.089 | 4.705E-01 | 6.675E-01 |
| MRPS18C    | -0.089 | 2.632E-01 | 3.812E-01 |
| ZNF492     | -0.089 | 8.760E-01 | 6.098E-01 |
| SH3BGRL    | -0.089 | 5.985E-01 | 4.226E-01 |
| B4GALNT1   | -0.089 | 8.349E-01 | 4.519E-01 |
| FAM133B    | -0.089 | 3.056E-01 | 6.879E-01 |
| UQCRB      | -0.089 | 4.328E-01 | 4.331E-01 |
| C15orf57   | -0.089 | 2.510E-01 | 7.971E-01 |
| RWDD1      | -0.089 | 3.339E-01 | 7.218E-01 |
| LHFPL2     | -0.089 | 4.962E-01 | 5.387E-01 |
| PSMB4      | -0.089 | 4.078E-01 | 8.420E-01 |
| BLVRA      | -0.089 | 6.516E-01 | 5.494E-01 |
| EL1-TNFRSF | -0.089 | 5.847E-01 | 5.511E-01 |
| PARP1      | -0.089 | 4.249E-01 | 4.167E-01 |
| PIGH       | -0.089 | 2.675E-01 | 4.975E-01 |
| DLST       | -0.089 | 2.924E-01 | 8.897E-01 |
| WDR45      | -0.089 | 3.839E-01 | 5.087E-01 |
| CDC20      | -0.089 | 6.664E-01 | 4.708E-01 |
| TNPO1      | -0.089 | 3.688E-01 | 5.649E-01 |
| XRCC4      | -0.089 | 3.620E-01 | 4.933E-01 |
| TMEM154    | -0.089 | 7.093E-01 | 5.377E-01 |
| PDP1       | -0.089 | 5.957E-01 | 5.058E-01 |
| COQ7       | -0.089 | 3.567E-01 | 4.892E-01 |
| RORB       | -0.089 | 8.460E-01 | 7.635E-01 |
| CFAP206    | -0.089 | 7.868E-01 | 5.350E-01 |
| NEDD1      | -0.089 | 4.053E-01 | 6.936E-01 |
| FBXO25     | -0.089 | 4.235E-01 | 3.936E-01 |
| MIR4650-2  | -0.089 | NA        | 8.059E-01 |
| MIR204     | -0.089 | NA        | 6.475E-01 |
| MIR3121    | -0.089 | NA        | 4.671E-01 |
| MIR509-1   | -0.089 | NA        | 8.358E-01 |
| ACTRT2     | -0.089 | NA        | 6.085E-01 |
| MIR4510    | -0.089 | NA        | 7.505E-01 |

|          |        |           |           |
|----------|--------|-----------|-----------|
| MIR513A2 | -0.089 | NA        | 6.385E-01 |
| RPAIN    | -0.089 | 4.486E-01 | 9.789E-01 |
| KCNMB4   | -0.089 | 7.754E-01 | 5.448E-01 |
| SNRPD2   | -0.090 | 4.301E-01 | 5.956E-01 |
| LGALS8   | -0.090 | 4.330E-01 | 7.690E-01 |
| NYAP1    | -0.090 | 7.764E-01 | 6.403E-01 |
| PCDH7    | -0.090 | 8.259E-01 | 4.920E-01 |
| PARVG    | -0.090 | 7.795E-01 | 5.254E-01 |
| NRXN1    | -0.090 | 8.830E-01 | 7.265E-01 |
| ZBED8    | -0.090 | 4.931E-01 | 6.039E-01 |
| VRK1     | -0.090 | 4.827E-01 | 4.057E-01 |
| CCR2     | -0.090 | 8.211E-01 | 4.580E-01 |
| AAMDC    | -0.090 | 5.944E-01 | 4.692E-01 |
| SLC30A9  | -0.090 | 2.604E-01 | 4.762E-01 |
| NPL      | -0.090 | 6.471E-01 | 6.724E-01 |
| DEAF1    | -0.090 | 4.294E-01 | 4.241E-01 |
| CHORDC1  | -0.090 | 5.064E-01 | 4.716E-01 |
| SMAD1    | -0.090 | 5.861E-01 | 6.953E-01 |
| C19orf44 | -0.090 | 3.736E-01 | 8.499E-01 |
| EIF3I    | -0.090 | 1.961E-01 | 7.036E-01 |
| PPID     | -0.090 | 2.254E-01 | 5.015E-01 |
| TFCP2    | -0.090 | 2.675E-01 | 4.989E-01 |
| ZNF710   | -0.090 | 3.507E-01 | 5.594E-01 |
| HNRNPA3  | -0.090 | 1.552E-01 | 6.897E-01 |
| PRDM15   | -0.090 | 3.422E-01 | 3.520E-01 |
| MIR4252  | -0.090 | NA        | 3.209E-01 |
| MIR8066  | -0.090 | NA        | 6.451E-01 |
| GTF2F2   | -0.090 | 3.292E-01 | 6.048E-01 |
| CAMKK1   | -0.090 | 6.188E-01 | 8.761E-01 |
| PUF60    | -0.090 | 3.410E-01 | 7.851E-01 |
| NRL      | -0.090 | 4.800E-01 | 4.975E-01 |
| ERP29    | -0.090 | 4.427E-01 | 5.835E-01 |
| GPX2     | -0.090 | 8.622E-01 | 9.369E-01 |
| SHISA3   | -0.090 | 8.645E-01 | 6.178E-01 |
| THOC7    | -0.090 | 3.355E-01 | 8.029E-01 |
| PERP     | -0.090 | 7.084E-01 | 3.570E-01 |
| FLT4     | -0.090 | 6.677E-01 | 5.000E-01 |
| EP400    | -0.091 | 2.822E-01 | 4.241E-01 |
| LMNTD2   | -0.091 | 6.854E-01 | 7.791E-01 |
| RPP25L   | -0.091 | 5.299E-01 | 8.249E-01 |
| SYNCRIP  | -0.091 | 2.157E-01 | 4.465E-01 |
| GP5      | -0.091 | 8.097E-01 | 5.907E-01 |
| TSHZ1    | -0.091 | 5.327E-01 | 5.225E-01 |
| GABRE    | -0.091 | 8.384E-01 | 6.722E-01 |
| RINL     | -0.091 | 6.981E-01 | 9.137E-01 |
| TUT1     | -0.091 | 3.826E-01 | 8.021E-01 |
| LRRC9    | -0.091 | 8.506E-01 | 5.079E-01 |
| WSB2     | -0.091 | 3.408E-01 | 5.158E-01 |
| BNIP3L   | -0.091 | 5.024E-01 | 9.265E-01 |
| WDR4     | -0.091 | 4.600E-01 | 6.275E-01 |

|           |        |           |           |
|-----------|--------|-----------|-----------|
| SFR1      | -0.091 | 3.836E-01 | 7.547E-01 |
| GGT6      | -0.091 | 8.224E-01 | 5.824E-01 |
| MIR544B   | -0.091 | 8.909E-01 | 7.097E-01 |
| SSX5      | -0.091 | 9.462E-01 | 5.284E-01 |
| BCL7C     | -0.091 | 4.874E-01 | 6.869E-01 |
| CCNH      | -0.091 | 2.624E-01 | 7.197E-01 |
| ATP6V1G2  | -0.091 | 6.970E-01 | 6.228E-01 |
| MIR4308   | -0.091 | NA        | 4.688E-01 |
| MIR1252   | -0.091 | NA        | 7.419E-01 |
| OR2G6     | -0.091 | NA        | 8.637E-01 |
| MLEC      | -0.091 | 4.257E-01 | 5.429E-01 |
| OR52K2    | -0.091 | NA        | 5.126E-01 |
| ARHGAP44  | -0.091 | 7.390E-01 | 2.525E-01 |
| RTCB      | -0.091 | 3.332E-01 | 7.373E-01 |
| ZNF107    | -0.091 | 6.190E-01 | 9.360E-01 |
| GBA2      | -0.091 | 3.972E-01 | 4.199E-01 |
| NEIL2     | -0.091 | 5.195E-01 | 6.078E-01 |
| NFAM1     | -0.091 | 7.874E-01 | 5.630E-01 |
| ZNF300    | -0.091 | 7.974E-01 | 5.106E-01 |
| DNM1L     | -0.091 | 2.900E-01 | 5.683E-01 |
| ACTR8     | -0.091 | 2.235E-01 | 8.096E-01 |
| USP10     | -0.091 | 2.281E-01 | 6.466E-01 |
| ALG8      | -0.091 | 3.973E-01 | 6.910E-01 |
| KRTAP2-3  | -0.091 | 9.026E-01 | 5.244E-01 |
| LRRK2     | -0.091 | 7.632E-01 | 4.839E-01 |
| CDC23     | -0.091 | 2.251E-01 | 5.429E-01 |
| FOXP1     | -0.091 | 5.181E-01 | 3.532E-01 |
| THYN1     | -0.091 | 4.471E-01 | 6.784E-01 |
| WDR47     | -0.091 | 4.555E-01 | 6.406E-01 |
| AQP11     | -0.091 | 5.826E-01 | 6.602E-01 |
| GPR108    | -0.091 | 2.582E-01 | 8.620E-01 |
| LAMTOR3   | -0.091 | 2.529E-01 | 8.666E-01 |
| BUB1B     | -0.091 | 5.999E-01 | 9.407E-01 |
| WBP1      | -0.091 | 5.475E-01 | 5.858E-01 |
| MIR8055   | -0.091 | 8.423E-01 | 5.492E-01 |
| CSNK2B    | -0.091 | 4.020E-01 | 6.424E-01 |
| RFC1      | -0.091 | 3.124E-01 | 5.177E-01 |
| MON2      | -0.091 | 3.504E-01 | 3.677E-01 |
| PHLPP1    | -0.091 | 5.928E-01 | 3.261E-01 |
| PTRH2     | -0.091 | 4.097E-01 | 9.630E-01 |
| DRC3      | -0.092 | 5.337E-01 | 9.682E-01 |
| CASP6     | -0.092 | 4.066E-01 | 6.890E-01 |
| LCE3E     | -0.092 | 9.299E-01 | 4.237E-01 |
| DHX35     | -0.092 | 2.483E-01 | 7.617E-01 |
| NUP153    | -0.092 | 4.840E-01 | 4.521E-01 |
| NAP1L1    | -0.092 | 3.190E-01 | 4.518E-01 |
| C14orf166 | -0.092 | 1.984E-01 | 7.879E-01 |
| FURIN     | -0.092 | 4.432E-01 | 3.205E-01 |
| MIR4298   | -0.092 | NA        | 4.972E-01 |
| GGA2      | -0.092 | 3.863E-01 | 4.712E-01 |

|            |        |           |           |
|------------|--------|-----------|-----------|
| PRRC2A     | -0.092 | 2.195E-01 | 6.236E-01 |
| ZNF529     | -0.092 | 4.909E-01 | 6.649E-01 |
| CDCA3      | -0.092 | 5.935E-01 | 9.600E-01 |
| MFF        | -0.092 | 3.356E-01 | 7.379E-01 |
| EEF1AKMT1  | -0.092 | 4.705E-01 | 6.826E-01 |
| MT-ND4     | -0.092 | 6.947E-01 | 5.850E-01 |
| ANP32A     | -0.092 | 2.181E-01 | 4.019E-01 |
| AC004832.3 | -0.092 | NA        | 5.192E-01 |
| MIR7843    | -0.092 | NA        | 5.356E-01 |
| MIR4314    | -0.092 | NA        | 5.320E-01 |
| NMS        | -0.092 | NA        | 5.113E-01 |
| HIPK2      | -0.092 | 6.440E-01 | 9.862E-01 |
| IGF2R      | -0.092 | 4.381E-01 | 9.806E-01 |
| DNTTIP2    | -0.092 | 2.634E-01 | 9.804E-01 |
| CHAF1A     | -0.092 | 4.298E-01 | 9.778E-01 |
| ZRSR2      | -0.092 | 3.917E-01 | 6.872E-01 |
| ZNF141     | -0.093 | 5.293E-01 | 9.294E-01 |
| AMACR      | -0.093 | 7.478E-01 | 7.662E-01 |
| ZKSCAN1    | -0.093 | 4.499E-01 | 5.383E-01 |
| PTPRQ      | -0.093 | 8.876E-01 | 5.756E-01 |
| PCMTD2     | -0.093 | 5.093E-01 | 8.313E-01 |
| GTF2H3     | -0.093 | 3.274E-01 | 6.161E-01 |
| ZNF793     | -0.093 | 7.128E-01 | 5.826E-01 |
| COMT       | -0.093 | 6.128E-01 | 3.580E-01 |
| MIER2      | -0.093 | 3.620E-01 | 8.428E-01 |
| MSI2       | -0.093 | 5.737E-01 | 6.769E-01 |
| SENP8      | -0.093 | 4.721E-01 | 6.323E-01 |
| RHBDL3     | -0.093 | 8.328E-01 | 4.543E-01 |
| ZC2HC1A    | -0.093 | 5.570E-01 | 7.941E-01 |
| CFLAR      | -0.093 | 4.084E-01 | 5.160E-01 |
| MT-ND3     | -0.093 | 6.977E-01 | 3.989E-01 |
| RPF1       | -0.093 | 1.954E-01 | 3.494E-01 |
| TTPA       | -0.093 | 8.673E-01 | 4.649E-01 |
| ZC3H4      | -0.093 | 1.292E-01 | 4.636E-01 |
| GPR75-ASB3 | -0.093 | 7.643E-01 | 4.737E-01 |
| ERICH1     | -0.093 | 3.319E-01 | 6.953E-01 |
| GPR183     | -0.093 | 7.729E-01 | 8.184E-01 |
| GTF2H1     | -0.093 | 2.573E-01 | 7.214E-01 |
| PCNX3      | -0.093 | 2.565E-01 | 7.453E-01 |
| HS3ST3B1   | -0.093 | 7.955E-01 | 5.157E-01 |
| FAM214B    | -0.093 | 4.800E-01 | 5.952E-01 |
| INTS1      | -0.093 | 3.253E-01 | 7.467E-01 |
| FER        | -0.093 | 5.024E-01 | 6.515E-01 |
| ZMYM2      | -0.093 | 4.278E-01 | 3.151E-01 |
| ZBTB39     | -0.093 | 4.733E-01 | 6.102E-01 |
| FBXL17     | -0.093 | 3.717E-01 | 3.962E-01 |
| BRI3BP     | -0.093 | 4.896E-01 | 4.605E-01 |
| RSPH9      | -0.093 | 4.206E-01 | 5.325E-01 |
| MIR103A2   | -0.093 | 6.484E-01 | 6.391E-01 |
| EBLN2      | -0.093 | 7.124E-01 | 6.408E-01 |

|            |        |           |           |
|------------|--------|-----------|-----------|
| ABHD16A    | -0.093 | 2.690E-01 | 6.109E-01 |
| ATP8B1     | -0.094 | 6.828E-01 | 7.957E-01 |
| COL24A1    | -0.094 | 7.410E-01 | 4.570E-01 |
| TAF1D      | -0.094 | 3.894E-01 | 6.368E-01 |
| RPAP3      | -0.094 | 2.537E-01 | 4.041E-01 |
| SMC4       | -0.094 | 6.162E-01 | 5.205E-01 |
| MYSM1      | -0.094 | 4.966E-01 | 2.816E-01 |
| U2AF1L4    | -0.094 | 4.900E-01 | 7.927E-01 |
| F8A2       | -0.094 | NA        | 8.774E-01 |
| TRIM42     | -0.094 | NA        | 5.340E-01 |
| VASH1      | -0.094 | 5.847E-01 | 7.558E-01 |
| ICA1       | -0.094 | 7.091E-01 | 5.847E-01 |
| FCRL2      | -0.094 | 8.699E-01 | 3.904E-01 |
| MIR1273D   | -0.094 | NA        | 5.941E-01 |
| TIMM13     | -0.094 | 5.193E-01 | 4.206E-01 |
| INPP5E     | -0.094 | 3.973E-01 | 4.971E-01 |
| RMDN2      | -0.094 | 4.968E-01 | 4.948E-01 |
| DEF8       | -0.094 | 3.302E-01 | 7.431E-01 |
| AMN1       | -0.094 | 4.941E-01 | 5.994E-01 |
| AL031708.1 | -0.094 | 7.021E-01 | 6.420E-01 |
| SETSIP     | -0.094 | 7.054E-01 | 4.486E-01 |
| GANC       | -0.094 | 3.874E-01 | 6.977E-01 |
| RHOF       | -0.094 | 7.638E-01 | 8.561E-01 |
| MTERF1     | -0.094 | 2.122E-01 | 3.884E-01 |
| TMEM141    | -0.094 | 5.774E-01 | 6.767E-01 |
| NIP7       | -0.094 | 3.544E-01 | 5.913E-01 |
| CD86       | -0.094 | 7.632E-01 | 2.629E-01 |
| SLC13A5    | -0.094 | 8.324E-01 | 8.380E-01 |
| ARHGDIB    | -0.094 | 5.662E-01 | 4.754E-01 |
| DCTD       | -0.094 | 2.095E-01 | 3.887E-01 |
| OR11H4     | -0.094 | 9.186E-01 | 5.061E-01 |
| PRCD       | -0.094 | 6.941E-01 | 4.596E-01 |
| MCPH1      | -0.094 | 3.056E-01 | 5.979E-01 |
| RALGAPA2   | -0.094 | 7.122E-01 | 6.617E-01 |
| TMEM244    | -0.094 | 8.760E-01 | 8.049E-01 |
| WSB1       | -0.094 | 5.305E-01 | 4.549E-01 |
| ARL4A      | -0.094 | 6.533E-01 | 3.737E-01 |
| SPTBN5     | -0.094 | 7.528E-01 | 8.052E-01 |
| SGF29      | -0.094 | 5.664E-01 | 5.167E-01 |
| DAZAP2     | -0.094 | 2.427E-01 | 9.143E-01 |
| GSR        | -0.094 | 6.387E-01 | 4.132E-01 |
| UBA3       | -0.094 | 2.493E-01 | 4.249E-01 |
| ZNF688     | -0.094 | 5.208E-01 | 6.494E-01 |
| ESRRG      | -0.094 | 8.421E-01 | 7.162E-01 |
| WDR3       | -0.094 | 4.070E-01 | 9.760E-01 |
| GOLGA8T    | -0.094 | 8.533E-01 | 5.305E-01 |
| SLC35E2    | -0.094 | 5.829E-01 | 4.593E-01 |
| IQSEC1     | -0.094 | 3.973E-01 | 4.150E-01 |
| SMARCAD1   | -0.095 | 3.279E-01 | 4.401E-01 |
| CDAN1      | -0.095 | 2.511E-01 | 5.332E-01 |



|            |        |           |           |
|------------|--------|-----------|-----------|
| DHRS7      | -0.095 | 4.530E-01 | 7.277E-01 |
| MRGBP      | -0.095 | 3.325E-01 | 7.782E-01 |
| CDC37      | -0.095 | 2.446E-01 | 3.668E-01 |
| ADSL       | -0.095 | 2.689E-01 | 4.652E-01 |
| SLC25A1    | -0.095 | 4.763E-01 | 2.295E-01 |
| MIR621     | -0.095 | 5.769E-01 | 3.371E-01 |
| KIAA0232   | -0.095 | 3.735E-01 | 4.823E-01 |
| GATA1      | -0.095 | 7.837E-01 | 4.116E-01 |
| IGSF6      | -0.095 | 7.402E-01 | 7.856E-01 |
| LYPD6B     | -0.095 | 7.508E-01 | 5.639E-01 |
| ZFP91-CNTF | -0.095 | 8.402E-01 | 8.935E-01 |
| SLC26A6    | -0.095 | 5.422E-01 | 5.433E-01 |
| TCN2       | -0.095 | 6.741E-01 | 3.350E-01 |
| APOL6      | -0.095 | 6.389E-01 | 7.286E-01 |
| SLC25A29   | -0.095 | 5.976E-01 | 5.004E-01 |
| MIR548S    | -0.095 | NA        | 4.933E-01 |
| MIR548AQ   | -0.095 | NA        | 6.256E-01 |
| MIR3927    | -0.095 | NA        | 8.374E-01 |
| OSBPL3     | -0.095 | 5.519E-01 | 2.563E-01 |
| TTC12      | -0.095 | 4.477E-01 | 8.239E-01 |
| INTS6      | -0.095 | 3.410E-01 | 3.535E-01 |
| OSBPL7     | -0.095 | 5.706E-01 | 4.583E-01 |
| USP24      | -0.095 | 2.480E-01 | 9.871E-01 |
| PRPF40A    | -0.095 | 1.706E-01 | 9.871E-01 |
| ABHD14B    | -0.095 | 5.373E-01 | 9.858E-01 |
| OCIAD1     | -0.095 | 1.857E-01 | 9.843E-01 |
| CTTN       | -0.095 | 5.455E-01 | 9.842E-01 |
| AC011498.5 | -0.095 | 8.446E-01 | 9.810E-01 |
| DEDD2      | -0.095 | 3.301E-01 | 6.596E-01 |
| SIRPB1     | -0.095 | 8.172E-01 | 5.043E-01 |
| PPP1R9B    | -0.096 | 2.666E-01 | 6.530E-01 |
| MIR1205    | -0.096 | NA        | 3.852E-01 |
| MLYCD      | -0.096 | 3.417E-01 | 2.982E-01 |
| CEP83      | -0.096 | 3.460E-01 | 4.784E-01 |
| MIR550A2   | -0.096 | NA        | 4.499E-01 |
| NRG1       | -0.096 | 8.589E-01 | 4.091E-01 |
| MT-ATP6    | -0.096 | 6.764E-01 | 3.734E-01 |
| PHF11      | -0.096 | 4.949E-01 | 7.702E-01 |
| PFKL       | -0.096 | 3.735E-01 | 4.831E-01 |
| C18orf8    | -0.096 | 3.154E-01 | 5.725E-01 |
| CDK19      | -0.096 | 3.324E-01 | 2.561E-01 |
| P2RY11     | -0.096 | 6.105E-01 | 5.495E-01 |
| SPDL1      | -0.096 | 3.863E-01 | 6.457E-01 |
| SYNJ2BP    | -0.096 | 2.356E-01 | 7.951E-01 |
| TFAM       | -0.096 | 3.003E-01 | 4.384E-01 |
| DENND4B    | -0.096 | 3.242E-01 | 7.774E-01 |
| ALS2       | -0.096 | 2.764E-01 | 8.882E-01 |
| HDX        | -0.096 | 6.848E-01 | 5.458E-01 |
| NOC3L      | -0.096 | 2.676E-01 | 3.083E-01 |
| DCUN1D2    | -0.096 | 3.883E-01 | 5.384E-01 |

|           |        |           |           |
|-----------|--------|-----------|-----------|
| CELF2     | -0.096 | 7.386E-01 | 5.143E-01 |
| ZNF605    | -0.096 | 4.633E-01 | 5.230E-01 |
| RPAP1     | -0.096 | 2.149E-01 | 6.213E-01 |
| NARFL     | -0.097 | 3.724E-01 | 4.670E-01 |
| IRAK4     | -0.097 | 3.139E-01 | 5.836E-01 |
| EXD3      | -0.097 | 5.229E-01 | 7.588E-01 |
| CASP9     | -0.097 | 3.840E-01 | 5.669E-01 |
| RSBN1L    | -0.097 | 1.699E-01 | 3.023E-01 |
| PIDD1     | -0.097 | 4.606E-01 | 5.120E-01 |
| PFN1      | -0.097 | 3.686E-01 | 2.716E-01 |
| DKK4      | -0.097 | 8.693E-01 | 4.661E-01 |
| PIKFYVE   | -0.097 | 3.221E-01 | 4.227E-01 |
| TMX1      | -0.097 | 3.176E-01 | 4.363E-01 |
| APOB      | -0.097 | 8.758E-01 | 2.941E-01 |
| EIF4E     | -0.097 | 2.465E-01 | 5.387E-01 |
| FSD2      | -0.097 | 7.566E-01 | 3.240E-01 |
| CNOT9     | -0.097 | 1.491E-01 | 7.567E-01 |
| SIPA1L1   | -0.097 | 2.517E-01 | 3.692E-01 |
| CHIC2     | -0.097 | 2.307E-01 | 4.430E-01 |
| TBC1D22A  | -0.097 | 2.226E-01 | 3.291E-01 |
| TWISTNB   | -0.097 | 3.742E-01 | 8.458E-01 |
| GLOD5     | -0.097 | 7.744E-01 | 3.096E-01 |
| DOK2      | -0.097 | 7.869E-01 | 6.839E-01 |
| TBCA      | -0.097 | 2.508E-01 | 5.221E-01 |
| BORCS5    | -0.097 | 3.086E-01 | 4.043E-01 |
| PC        | -0.097 | 6.336E-01 | 7.464E-01 |
| UPF1      | -0.097 | 8.669E-02 | 7.401E-01 |
| PI4K2B    | -0.097 | 3.533E-01 | 3.828E-01 |
| RNASEH2B  | -0.097 | 3.761E-01 | 7.726E-01 |
| TMA16     | -0.097 | 2.606E-01 | 4.030E-01 |
| CCDC25    | -0.097 | 2.978E-01 | 5.339E-01 |
| MIR596    | -0.097 | NA        | 3.267E-01 |
| KRTAP10-3 | -0.097 | NA        | 8.590E-01 |
| SPATA7    | -0.097 | 3.819E-01 | 5.678E-01 |
| PCYOX1L   | -0.097 | 4.907E-01 | 4.826E-01 |
| ADAT3     | -0.097 | 6.057E-01 | 5.067E-01 |
| CTAGE5    | -0.097 | 3.959E-01 | 5.261E-01 |
| PPP5D1    | -0.097 | 5.662E-01 | 5.205E-01 |
| TRIM61    | -0.097 | 8.172E-01 | 3.941E-01 |
| RNF25     | -0.097 | 3.522E-01 | 3.927E-01 |
| ZSWIM3    | -0.097 | 4.092E-01 | 3.452E-01 |
| GABRA2    | -0.097 | 8.771E-01 | 6.655E-01 |
| IFT27     | -0.097 | 5.306E-01 | 6.713E-01 |
| PELP1     | -0.098 | 3.524E-01 | 4.533E-01 |
| PPP1R14B  | -0.098 | 4.552E-01 | 3.517E-01 |
| WDR89     | -0.098 | 2.443E-01 | 5.152E-01 |
| USP30     | -0.098 | 2.556E-01 | 7.438E-01 |
| ALKBH4    | -0.098 | 2.315E-01 | 8.087E-01 |
| TIMM44    | -0.098 | 2.732E-01 | 9.661E-01 |
| VPS13A    | -0.098 | 4.302E-01 | 9.675E-01 |

|          |        |           |           |
|----------|--------|-----------|-----------|
| ZNF862   | -0.098 | 6.024E-01 | 4.268E-01 |
| NUDT8    | -0.098 | 6.424E-01 | 3.252E-01 |
| TTC8     | -0.098 | 4.054E-01 | 6.456E-01 |
| TMEM168  | -0.098 | 4.841E-01 | 8.353E-01 |
| ZSCAN5A  | -0.098 | 4.200E-01 | 2.799E-01 |
| NDE1     | -0.098 | 5.516E-01 | 9.365E-01 |
| CRLF3    | -0.098 | 2.976E-01 | 5.552E-01 |
| MIR4421  | -0.098 | NA        | 3.388E-01 |
| MIXL1    | -0.098 | 7.993E-01 | 5.547E-01 |
| RABGGTB  | -0.098 | 3.403E-01 | 3.539E-01 |
| MIR3678  | -0.098 | NA        | 4.253E-01 |
| OR12D3   | -0.098 | NA        | 5.584E-01 |
| OR9A2    | -0.098 | NA        | 2.657E-01 |
| MIR1278  | -0.098 | NA        | 2.628E-01 |
| RFNG     | -0.098 | 3.970E-01 | 4.273E-01 |
| ZNF441   | -0.098 | 5.015E-01 | 4.579E-01 |
| TMEM267  | -0.098 | 3.185E-01 | 2.156E-01 |
| PRKCQ    | -0.098 | 8.092E-01 | 9.081E-01 |
| GALE     | -0.098 | 5.091E-01 | 5.558E-01 |
| FARP2    | -0.098 | 3.762E-01 | 4.227E-01 |
| PHLDA3   | -0.098 | 6.101E-01 | 4.471E-01 |
| DOT1L    | -0.098 | 3.670E-01 | 8.408E-01 |
| WDR19    | -0.098 | 3.736E-01 | 4.983E-01 |
| ARID2    | -0.098 | 3.459E-01 | 6.310E-01 |
| CHD7     | -0.098 | 4.772E-01 | 9.864E-01 |
| TSPY2    | -0.098 | 9.756E-01 | 9.864E-01 |
| FARSA    | -0.098 | 1.734E-01 | 9.864E-01 |
| RNF43    | -0.098 | 7.770E-01 | 3.943E-01 |
| CCDC28A  | -0.098 | 3.319E-01 | 5.724E-01 |
| SNRPA1   | -0.098 | 2.551E-01 | 4.782E-01 |
| DNASE1L3 | -0.098 | 8.192E-01 | 6.525E-01 |
| MRPL52   | -0.098 | 4.216E-01 | 5.194E-01 |
| ADH1A    | -0.098 | 8.514E-01 | 5.734E-01 |
| NOSTRIN  | -0.098 | 6.387E-01 | 3.123E-01 |
| NDUFA1   | -0.098 | 4.042E-01 | 6.973E-01 |
| SNAI1    | -0.098 | 7.408E-01 | 5.169E-01 |
| TRPV1    | -0.098 | 7.120E-01 | 4.725E-01 |
| FUNDC1   | -0.098 | 3.108E-01 | 7.304E-01 |
| USP28    | -0.098 | 3.382E-01 | 5.252E-01 |
| ZNF281   | -0.099 | 4.230E-01 | 4.098E-01 |
| TROAP    | -0.099 | 5.752E-01 | 2.941E-01 |
| NEMP2    | -0.099 | 4.200E-01 | 6.105E-01 |
| ELK4     | -0.099 | 3.628E-01 | 4.761E-01 |
| ZSCAN29  | -0.099 | 3.232E-01 | 7.001E-01 |
| EMILIN2  | -0.099 | 6.853E-01 | 9.352E-01 |
| TTC36    | -0.099 | 7.180E-01 | 7.949E-01 |
| MLLT1    | -0.099 | 1.360E-01 | 6.523E-01 |
| ABT1     | -0.099 | 2.044E-01 | 6.585E-01 |
| MTSS1L   | -0.099 | 5.662E-01 | 2.923E-01 |
| RAB3A    | -0.099 | 5.744E-01 | 4.025E-01 |

|            |        |           |           |
|------------|--------|-----------|-----------|
| TIMM10     | -0.099 | 3.866E-01 | 8.585E-01 |
| HRH3       | -0.099 | 8.909E-01 | 4.205E-01 |
| ACAA1      | -0.099 | 5.162E-01 | 3.750E-01 |
| ANKRD11    | -0.099 | 2.581E-01 | 4.066E-01 |
| AC114490.2 | -0.099 | 5.758E-01 | 6.360E-01 |
| COX18      | -0.099 | 2.936E-01 | 8.000E-01 |
| MIR3153    | -0.099 | 7.945E-01 | 7.569E-01 |
| NPAS1      | -0.099 | 7.080E-01 | 6.846E-01 |
| SEMA4A     | -0.099 | 5.675E-01 | 7.918E-01 |
| SMIM4      | -0.099 | 5.516E-01 | 4.921E-01 |
| SPAG7      | -0.099 | 3.268E-01 | 3.854E-01 |
| C11orf58   | -0.099 | 2.066E-01 | 4.630E-01 |
| USP49      | -0.099 | 4.223E-01 | 9.145E-01 |
| POLR2E     | -0.099 | 2.210E-01 | 4.976E-01 |
| WASHC3     | -0.099 | 2.585E-01 | 7.279E-01 |
| SGTB       | -0.099 | 5.867E-01 | 4.176E-01 |
| MIR4739    | -0.099 | NA        | 8.163E-01 |
| MIR512-2   | -0.099 | NA        | 8.107E-01 |
| MIR548AX   | -0.099 | NA        | 4.306E-01 |
| MIR548X2   | -0.099 | NA        | 5.914E-01 |
| MIR6815    | -0.099 | NA        | 7.766E-01 |
| MIR3672    | -0.099 | NA        | 2.788E-01 |
| MIR507     | -0.099 | NA        | 2.318E-01 |
| OR4S1      | -0.099 | NA        | 7.400E-01 |
| MIR369     | -0.099 | NA        | 9.615E-01 |
| MIR6803    | -0.099 | NA        | 9.693E-01 |
| OR8J1      | -0.099 | NA        | 9.800E-01 |
| ZSWIM7     | -0.099 | 3.670E-01 | 2.734E-01 |
| OGFOD3     | -0.099 | 2.922E-01 | 2.215E-01 |
| IL5RA      | -0.099 | 8.045E-01 | 3.560E-01 |
| MR1        | -0.099 | 5.338E-01 | 3.251E-01 |
| ATP1A4     | -0.099 | 8.625E-01 | 4.636E-01 |
| SRP19      | -0.100 | 2.107E-01 | 2.905E-01 |
| MTA1       | -0.100 | 2.624E-01 | 3.970E-01 |
| CAPZA1     | -0.100 | 1.839E-01 | 7.745E-01 |
| MACROD1    | -0.100 | 6.364E-01 | 4.181E-01 |
| FCGR2B     | -0.100 | 7.802E-01 | 5.493E-01 |
| FAM122B    | -0.100 | 3.822E-01 | 3.603E-01 |
| FAN1       | -0.100 | 3.794E-01 | 3.132E-01 |
| ILDR1      | -0.100 | 6.673E-01 | 6.135E-01 |
| ABCA7      | -0.100 | 5.996E-01 | 3.117E-01 |
| MED13L     | -0.100 | 3.842E-01 | 4.598E-01 |
| ZGPAT      | -0.100 | 2.558E-01 | 5.935E-01 |
| SRSF7      | -0.100 | 5.672E-02 | 4.292E-01 |
| PID1       | -0.100 | 7.691E-01 | 6.986E-01 |
| PIK3C2A    | -0.100 | 3.147E-01 | 3.008E-01 |
| RTF1       | -0.100 | 2.130E-01 | 7.261E-01 |
| RAB30      | -0.100 | 5.887E-01 | 5.592E-01 |
| UBE2E3     | -0.100 | 2.317E-01 | 3.371E-01 |
| MAGOH      | -0.100 | 2.576E-01 | 4.483E-01 |

|           |        |           |           |
|-----------|--------|-----------|-----------|
| RFX7      | -0.100 | 3.803E-01 | 5.062E-01 |
| GJA8      | -0.100 | NA        | 5.520E-01 |
| MIR4514   | -0.100 | NA        | 3.009E-01 |
| TMCC3     | -0.100 | 7.138E-01 | 3.710E-01 |
| ZNF280C   | -0.100 | 4.301E-01 | 5.314E-01 |
| BDP1      | -0.100 | 3.796E-01 | 7.330E-01 |
| OXA1L     | -0.100 | 1.968E-01 | 3.097E-01 |
| EWSR1     | -0.100 | 5.352E-02 | 9.706E-01 |
| CCDC88B   | -0.100 | 6.626E-01 | 9.706E-01 |
| RAVER2    | -0.100 | 6.311E-01 | 9.719E-01 |
| NPRL3     | -0.100 | 2.107E-01 | 9.722E-01 |
| C22orf46  | -0.100 | 2.922E-01 | 2.732E-01 |
| RBM27     | -0.100 | 1.241E-01 | 3.298E-01 |
| COPS5     | -0.100 | 1.421E-01 | 4.786E-01 |
| CD1A      | -0.100 | 8.318E-01 | 3.500E-01 |
| ULBP1     | -0.100 | 7.754E-01 | 6.355E-01 |
| RAB37     | -0.100 | 7.443E-01 | 6.784E-01 |
| RNGTT     | -0.100 | 2.686E-01 | 7.437E-01 |
| IQCF3     | -0.100 | NA        | 4.401E-01 |
| ADAMTS7   | -0.100 | 6.748E-01 | 4.321E-01 |
| FMN1      | -0.100 | 7.488E-01 | 4.437E-01 |
| DDX55     | -0.101 | 2.675E-01 | 4.416E-01 |
| GCN1      | -0.101 | 2.551E-01 | 4.981E-01 |
| ORAI2     | -0.101 | 4.735E-01 | 8.210E-01 |
| DTX3L     | -0.101 | 4.814E-01 | 5.528E-01 |
| ARSK      | -0.101 | 3.999E-01 | 3.808E-01 |
| CLYBL     | -0.101 | 6.094E-01 | 3.374E-01 |
| RNPC3     | -0.101 | 4.305E-01 | 4.448E-01 |
| SCGB3A1   | -0.101 | 8.232E-01 | 7.126E-01 |
| MIR6876   | -0.101 | NA        | 6.358E-01 |
| MIR450B   | -0.101 | NA        | 6.817E-01 |
| ANGPTL3   | -0.101 | 7.415E-01 | 5.904E-01 |
| GDF6      | -0.101 | 8.093E-01 | 2.923E-01 |
| SMARCA5   | -0.101 | 2.315E-01 | 4.699E-01 |
| RELL2     | -0.101 | 5.629E-01 | 3.946E-01 |
| CIR1      | -0.101 | 1.497E-01 | 6.594E-01 |
| GEMIN4    | -0.101 | 3.422E-01 | 7.852E-01 |
| NDUFV1    | -0.101 | 3.368E-01 | 4.989E-01 |
| KATNB1    | -0.101 | 2.282E-01 | 7.240E-01 |
| CAMKMT    | -0.101 | 3.571E-01 | 8.366E-01 |
| NAA15     | -0.101 | 2.435E-01 | 4.580E-01 |
| MEGF11    | -0.101 | 6.701E-01 | 4.368E-01 |
| PPP1R13B  | -0.101 | 3.968E-01 | 6.891E-01 |
| UNC119B   | -0.101 | 5.176E-01 | 3.305E-01 |
| FAM227B   | -0.101 | 4.833E-01 | 8.687E-01 |
| LMBR1L    | -0.101 | 3.874E-01 | 4.000E-01 |
| MORN4     | -0.101 | 4.997E-01 | 8.988E-01 |
| EBF3      | -0.101 | 7.083E-01 | 9.857E-01 |
| RRH       | -0.101 | 7.509E-01 | 9.857E-01 |
| C14orf178 | -0.101 | 8.092E-01 | 9.857E-01 |

|            |        |           |           |
|------------|--------|-----------|-----------|
| MYH7       | -0.101 | 8.533E-01 | 4.703E-01 |
| ATG2B      | -0.101 | 2.961E-01 | 3.678E-01 |
| ING3       | -0.101 | 1.978E-01 | 4.267E-01 |
| NRROS      | -0.101 | 6.846E-01 | 4.113E-01 |
| TAC4       | -0.101 | 7.547E-01 | 5.605E-01 |
| SLC25A46   | -0.101 | 2.393E-01 | 5.394E-01 |
| MIR320B2   | -0.101 | 8.081E-01 | 6.460E-01 |
| HJURP      | -0.102 | 5.516E-01 | 9.399E-01 |
| STX1A      | -0.102 | 5.732E-01 | 6.318E-01 |
| THUMPD2    | -0.102 | 2.206E-01 | 6.939E-01 |
| NSD1       | -0.102 | 3.005E-01 | 8.759E-01 |
| POGLUT1    | -0.102 | 3.017E-01 | 6.259E-01 |
| MXII       | -0.102 | 4.697E-01 | 8.588E-01 |
| NUTM2D     | -0.102 | 5.831E-01 | 4.253E-01 |
| CFAP46     | -0.102 | 8.167E-01 | 5.130E-01 |
| MIR3199-1  | -0.102 | NA        | 3.201E-01 |
| FBXO9      | -0.102 | 2.312E-01 | 5.081E-01 |
| PLAGL2     | -0.102 | 4.934E-01 | 3.021E-01 |
| TULP4      | -0.102 | 1.808E-01 | 5.131E-01 |
| MARF1      | -0.102 | 1.947E-01 | 8.569E-01 |
| CSAG3      | -0.102 | 8.831E-01 | 5.649E-01 |
| TAF1A      | -0.102 | 3.973E-01 | 3.999E-01 |
| OXER1      | -0.102 | 7.180E-01 | 6.949E-01 |
| PCBP2      | -0.102 | 1.137E-01 | 7.022E-01 |
| CLASP1     | -0.102 | 1.665E-01 | 2.907E-01 |
| MIR374A    | -0.102 | NA        | 7.507E-01 |
| TEX28      | -0.102 | NA        | 4.958E-01 |
| KRTAP10-5  | -0.102 | NA        | 6.234E-01 |
| AC005837.2 | -0.102 | NA        | 3.475E-01 |
| MIR506     | -0.102 | NA        | 4.016E-01 |
| MIR520H    | -0.102 | NA        | 4.573E-01 |
| RANBP3     | -0.102 | 1.132E-01 | 4.728E-01 |
| DHX58      | -0.102 | 5.071E-01 | 2.718E-01 |
| TTC22      | -0.102 | 6.820E-01 | 4.232E-01 |
| IFT80      | -0.102 | 3.355E-01 | 2.692E-01 |
| HSPA1A     | -0.102 | 7.666E-01 | 4.519E-01 |
| MARK3      | -0.102 | 1.658E-01 | 1.999E-01 |
| PRPSAP2    | -0.102 | 3.067E-01 | 8.255E-01 |
| MRPS9      | -0.102 | 1.914E-01 | 5.878E-01 |
| NUP50      | -0.102 | 2.085E-01 | 6.905E-01 |
| CDK11A     | -0.102 | 4.130E-01 | 8.699E-01 |
| MDP1       | -0.102 | 3.337E-01 | 5.777E-01 |
| PARS2      | -0.103 | 2.671E-01 | 3.060E-01 |
| RPP30      | -0.103 | 1.937E-01 | 6.110E-01 |
| ADD1       | -0.103 | 1.407E-01 | 7.603E-01 |
| DTD2       | -0.103 | 3.600E-01 | 9.517E-01 |
| SIN3B      | -0.103 | 2.692E-01 | 9.531E-01 |
| PCBD2      | -0.103 | 2.516E-01 | 4.623E-01 |
| SERF1B     | -0.103 | 5.060E-01 | 9.628E-01 |
| ALG11      | -0.103 | 3.642E-01 | 5.215E-01 |

|            |        |           |           |
|------------|--------|-----------|-----------|
| GRK2       | -0.103 | 2.790E-01 | 6.324E-01 |
| SNRNP70    | -0.103 | 3.175E-01 | 3.692E-01 |
| YRDC       | -0.103 | 3.132E-01 | 2.608E-01 |
| PRKCA      | -0.103 | 6.149E-01 | 3.131E-01 |
| MIR33A     | -0.103 | NA        | 3.624E-01 |
| LONP1      | -0.103 | 2.125E-01 | 6.843E-01 |
| DECR2      | -0.103 | 5.106E-01 | 5.659E-01 |
| CNTROB     | -0.103 | 2.205E-01 | 2.846E-01 |
| CDCA4      | -0.103 | 5.065E-01 | 8.382E-01 |
| SDK1       | -0.103 | 7.280E-01 | 4.414E-01 |
| HECW1      | -0.103 | 7.795E-01 | 8.584E-01 |
| KLC4       | -0.103 | 3.264E-01 | 8.212E-01 |
| SPATS2L    | -0.103 | 4.662E-01 | 6.414E-01 |
| GEMIN2     | -0.103 | 3.587E-01 | 3.859E-01 |
| OR52K1     | -0.103 | NA        | 6.814E-01 |
| COQ9       | -0.103 | 2.454E-01 | 3.693E-01 |
| NDOR1      | -0.103 | 3.221E-01 | 2.334E-01 |
| SLC25A6    | -0.103 | 4.071E-01 | 8.049E-01 |
| PPT2-EGFL8 | -0.103 | 5.070E-01 | 4.406E-01 |
| EOGT       | -0.103 | 4.375E-01 | 3.599E-01 |
| MAST4      | -0.103 | 5.999E-01 | 5.949E-01 |
| WASF2      | -0.103 | 4.525E-01 | 2.753E-01 |
| TNFRSF1B   | -0.103 | 6.566E-01 | 2.970E-01 |
| PPM1F      | -0.103 | 3.782E-01 | 5.051E-01 |
| BTG1       | -0.103 | 4.800E-01 | 5.915E-01 |
| SLC6A12    | -0.103 | 7.737E-01 | 5.674E-01 |
| ZNF546     | -0.103 | 5.526E-01 | 3.835E-01 |
| NOXRED1    | -0.103 | 5.701E-01 | 8.467E-01 |
| SPOUT1     | -0.104 | 2.044E-01 | 5.332E-01 |
| OR7A17     | -0.104 | NA        | 4.426E-01 |
| KRTAP26-1  | -0.104 | NA        | 5.695E-01 |
| NDFIP2     | -0.104 | 4.924E-01 | 2.974E-01 |
| LZTS3      | -0.104 | 6.413E-01 | 9.556E-01 |
| CDC45      | -0.104 | 5.596E-01 | 2.810E-01 |
| ITGB2      | -0.104 | 7.730E-01 | 7.127E-01 |
| TMEM8B     | -0.104 | 4.476E-01 | 2.409E-01 |
| PSMA4      | -0.104 | 2.195E-01 | 4.807E-01 |
| RPS27A     | -0.104 | 3.217E-01 | 7.874E-01 |
| GEMIN8     | -0.104 | 3.572E-01 | 3.677E-01 |
| MYCBP2     | -0.104 | 4.465E-01 | 6.211E-01 |
| FLG        | -0.104 | 8.438E-01 | 3.395E-01 |
| ERBIN      | -0.104 | 2.790E-01 | 6.247E-01 |
| NAP1L4     | -0.104 | 1.622E-01 | 3.284E-01 |
| BRMS1L     | -0.104 | 4.227E-01 | 8.306E-01 |
| FUS        | -0.104 | 1.658E-01 | 3.571E-01 |
| SFT2D1     | -0.104 | 1.538E-01 | 4.440E-01 |
| MIR1290    | -0.104 | NA        | 7.059E-01 |
| MUTYH      | -0.104 | 3.489E-01 | 3.432E-01 |
| BDH1       | -0.104 | 5.981E-01 | 3.247E-01 |
| NOL6       | -0.104 | 3.056E-01 | 8.156E-01 |

|            |        |           |           |
|------------|--------|-----------|-----------|
| SAMM50     | -0.104 | 2.730E-01 | 3.970E-01 |
| PMS1       | -0.104 | 1.782E-01 | 8.653E-01 |
| INF2       | -0.104 | 4.490E-01 | 8.166E-01 |
| AHSA1      | -0.104 | 1.975E-01 | 4.307E-01 |
| RICTOR     | -0.104 | 3.228E-01 | 9.173E-01 |
| ARHGEF1    | -0.104 | 2.855E-01 | 4.096E-01 |
| MRPL43     | -0.104 | 1.980E-01 | 2.715E-01 |
| MIR5000    | -0.104 | NA        | 3.751E-01 |
| FOXE1      | -0.104 | 8.693E-01 | 5.128E-01 |
| FAM111A    | -0.104 | 3.475E-01 | 7.758E-01 |
| LMO4       | -0.104 | 5.788E-01 | 3.662E-01 |
| MAP3K12    | -0.104 | 5.045E-01 | 4.190E-01 |
| BCL2L11    | -0.104 | 3.833E-01 | 6.358E-01 |
| NPM3       | -0.104 | 5.054E-01 | 3.843E-01 |
| TUBA1C     | -0.104 | 4.060E-01 | 7.384E-01 |
| AFAP1L2    | -0.104 | 6.871E-01 | 2.324E-01 |
| SOD2       | -0.104 | 6.751E-01 | 4.695E-01 |
| AC009779.3 | -0.105 | 5.030E-01 | 7.698E-01 |
| TBC1D2     | -0.105 | 5.706E-01 | 7.055E-01 |
| SLC1A1     | -0.105 | 6.977E-01 | 9.454E-01 |
| NR4A1      | -0.105 | 7.507E-01 | 4.245E-01 |
| PTPN13     | -0.105 | 6.751E-01 | 4.825E-01 |
| CYYR1      | -0.105 | 5.930E-01 | 8.509E-01 |
| F2RL2      | -0.105 | 7.944E-01 | 7.261E-01 |
| RRAS2      | -0.105 | 5.415E-01 | 4.763E-01 |
| NDUFS5     | -0.105 | 4.646E-01 | 4.925E-01 |
| QDPR       | -0.105 | 3.863E-01 | 3.916E-01 |
| LGALS3BP   | -0.105 | 5.435E-01 | 4.824E-01 |
| AC010463.1 | -0.105 | NA        | 7.008E-01 |
| MIR1273A   | -0.105 | NA        | 9.349E-01 |
| MIR1251    | -0.105 | NA        | 7.680E-01 |
| OR13C4     | -0.105 | NA        | 2.075E-01 |
| MIR625     | -0.105 | NA        | 4.813E-01 |
| LINC00116  | -0.105 | 5.218E-01 | 4.145E-01 |
| BX248409.2 | -0.105 | NA        | 5.328E-01 |
| MIR513C    | -0.105 | NA        | 5.864E-01 |
| MIR548AO   | -0.105 | NA        | 4.754E-01 |
| GFRA2      | -0.105 | 7.464E-01 | 3.817E-01 |
| TOMM22     | -0.105 | 2.225E-01 | 3.503E-01 |
| SLC22A16   | -0.105 | 8.196E-01 | 5.115E-01 |
| PCBP3      | -0.105 | 7.681E-01 | 3.367E-01 |
| DDX56      | -0.105 | 1.816E-01 | 7.884E-01 |
| GCNT2      | -0.105 | 7.442E-01 | 5.601E-01 |
| HIC2       | -0.105 | 7.451E-01 | 3.228E-01 |
| SDHD       | -0.105 | 2.356E-01 | 2.953E-01 |
| MIR150     | -0.105 | NA        | 3.210E-01 |
| DUSP28     | -0.105 | 3.422E-01 | 2.654E-01 |
| NLRP7      | -0.105 | 8.663E-01 | 4.193E-01 |
| RALGDS     | -0.105 | 3.234E-01 | 5.502E-01 |
| CACTIN     | -0.105 | 2.073E-01 | 8.444E-01 |



|            |        |           |           |
|------------|--------|-----------|-----------|
| KIAA1551   | -0.105 | 3.966E-01 | 6.079E-01 |
| MNAT1      | -0.105 | 2.980E-01 | 5.681E-01 |
| FNDC8      | -0.105 | 7.558E-01 | 7.386E-01 |
| SNRPD3     | -0.105 | 2.578E-01 | 3.970E-01 |
| KIAA1147   | -0.105 | 4.715E-01 | 4.660E-01 |
| RNPEPL1    | -0.105 | 3.714E-01 | 2.306E-01 |
| PHF24      | -0.105 | 7.994E-01 | 9.592E-01 |
| UQCC2      | -0.105 | 3.918E-01 | 9.594E-01 |
| ORCS8-MEF2 | -0.105 | 5.325E-01 | 2.925E-01 |
| GTF2H2     | -0.105 | 6.444E-01 | 4.097E-01 |
| CHRNA10    | -0.105 | 6.329E-01 | 5.366E-01 |
| AKR1C3     | -0.105 | 8.167E-01 | 4.009E-01 |
| NCL        | -0.105 | 2.657E-01 | 2.253E-01 |
| ZC3H10     | -0.105 | 3.286E-01 | 5.920E-01 |
| STXBP2     | -0.105 | 3.905E-01 | 7.557E-01 |
| SCRIB      | -0.105 | 3.548E-01 | 2.191E-01 |
| HSD17B8    | -0.106 | 5.442E-01 | 6.548E-01 |
| MRPL38     | -0.106 | 2.569E-01 | 2.316E-01 |
| MT-ATP8    | -0.106 | 7.013E-01 | 3.457E-01 |
| BIN3       | -0.106 | 2.346E-01 | 6.273E-01 |
| TPRX1      | -0.106 | NA        | 2.089E-01 |
| PPP1CC     | -0.106 | 1.582E-01 | 3.803E-01 |
| CCDC172    | -0.106 | NA        | 7.162E-01 |
| ERO1A      | -0.106 | 5.204E-01 | 4.604E-01 |
| UTF1       | -0.106 | 8.570E-01 | 9.825E-01 |
| ZGLP1      | -0.106 | 6.454E-01 | 7.919E-01 |
| PPP1R10    | -0.106 | 1.917E-01 | 4.821E-01 |
| SPRED2     | -0.106 | 3.841E-01 | 3.188E-01 |
| LRR1       | -0.106 | 4.054E-01 | 2.462E-01 |
| RNF14      | -0.106 | 1.232E-01 | 3.302E-01 |
| MIR5009    | -0.106 | NA        | 4.990E-01 |
| MIR589     | -0.106 | 6.897E-01 | 6.770E-01 |
| PRR4       | -0.106 | 4.844E-01 | 3.199E-01 |
| NUDT16L1   | -0.106 | 2.813E-01 | 4.058E-01 |
| TBC1D2B    | -0.106 | 3.267E-01 | 4.095E-01 |
| FAM162B    | -0.106 | 6.937E-01 | 6.843E-01 |
| IRX4       | -0.106 | 8.971E-01 | 3.241E-01 |
| CWC22      | -0.106 | 9.192E-02 | 5.306E-01 |
| CCDC78     | -0.106 | 6.979E-01 | 7.894E-01 |
| INO80D     | -0.106 | 2.425E-01 | 8.434E-01 |
| ZNF485     | -0.106 | 3.953E-01 | 5.862E-01 |
| HSBP1      | -0.106 | 2.375E-01 | 3.460E-01 |
| RIMS4      | -0.106 | 8.592E-01 | 4.878E-01 |
| THAP2      | -0.106 | 3.430E-01 | 5.346E-01 |
| FAM57B     | -0.106 | 7.819E-01 | 7.552E-01 |
| ANAPC10    | -0.106 | 1.984E-01 | 3.401E-01 |
| LAMTOR5    | -0.106 | 1.568E-01 | 5.672E-01 |
| PRKACB     | -0.106 | 5.348E-01 | 3.242E-01 |
| B9D2       | -0.106 | 4.499E-01 | 3.526E-01 |
| ZNF474     | -0.106 | 7.029E-01 | 3.095E-01 |

|          |        |           |           |
|----------|--------|-----------|-----------|
| SOGA3    | -0.106 | 7.364E-01 | 6.963E-01 |
| MCEMP1   | -0.106 | 7.850E-01 | 5.575E-01 |
| RBM12B   | -0.106 | 3.093E-01 | 5.768E-01 |
| RNF152   | -0.106 | 6.415E-01 | 6.967E-01 |
| GLRX3    | -0.106 | 2.399E-01 | 5.441E-01 |
| OTUD4    | -0.106 | 3.240E-01 | 9.585E-01 |
| ZNF708   | -0.106 | 5.133E-01 | 6.968E-01 |
| EML4     | -0.106 | 3.317E-01 | 3.080E-01 |
| DEFB136  | -0.106 | NA        | 4.915E-01 |
| MIR4731  | -0.106 | NA        | 8.199E-01 |
| MIR6882  | -0.106 | NA        | 6.073E-01 |
| OR10J3   | -0.106 | NA        | 5.777E-01 |
| MIR6718  | -0.106 | NA        | 2.337E-01 |
| PIK3R6   | -0.106 | 6.730E-01 | 5.043E-01 |
| TIAM2    | -0.106 | 4.378E-01 | 7.354E-01 |
| WDR55    | -0.106 | 1.289E-01 | 4.680E-01 |
| ABHD17A  | -0.107 | 2.876E-01 | 4.816E-01 |
| LYPD6    | -0.107 | 7.175E-01 | 2.298E-01 |
| PDZD7    | -0.107 | 7.093E-01 | 3.299E-01 |
| PRKD2    | -0.107 | 2.101E-01 | 3.098E-01 |
| OTOP2    | -0.107 | 8.587E-01 | 1.653E-01 |
| CCDC134  | -0.107 | 4.833E-01 | 2.644E-01 |
| REPS1    | -0.107 | 1.364E-01 | 1.762E-01 |
| C9orf152 | -0.107 | 8.249E-01 | 7.462E-01 |
| ENTPD6   | -0.107 | 3.083E-01 | 2.924E-01 |
| NRARP    | -0.107 | 7.363E-01 | 7.264E-01 |
| GTF2H2C  | -0.107 | 3.894E-01 | 9.184E-01 |
| PMPCA    | -0.107 | 3.056E-01 | 3.313E-01 |
| C8orf59  | -0.107 | 2.924E-01 | 5.927E-01 |
| APPL2    | -0.107 | 3.174E-01 | 2.957E-01 |
| TSSK6    | -0.107 | 3.928E-01 | 5.709E-01 |
| FBXO38   | -0.107 | 1.502E-01 | 6.093E-01 |
| MLF2     | -0.107 | 1.732E-01 | 2.768E-01 |
| PSMA1    | -0.107 | 1.555E-01 | 8.029E-01 |
| RFPL4AL1 | -0.107 | NA        | 3.255E-01 |
| ZNF8     | -0.107 | 3.335E-01 | 7.173E-01 |
| SGPP2    | -0.107 | 7.413E-01 | 3.551E-01 |
| ZNF333   | -0.107 | 4.112E-01 | 2.519E-01 |
| CCT6A    | -0.107 | 3.662E-01 | 4.907E-01 |
| TTL8     | -0.107 | 8.829E-01 | 5.983E-01 |
| SFN      | -0.107 | 7.275E-01 | 3.706E-01 |
| STAG3    | -0.107 | 6.887E-01 | 4.168E-01 |
| LRRC69   | -0.107 | 6.393E-01 | 3.510E-01 |
| MIR1273H | -0.107 | NA        | 8.040E-01 |
| MLXIPL   | -0.107 | 7.977E-01 | 8.426E-01 |
| ATG12    | -0.107 | 2.091E-01 | 3.069E-01 |
| TOB2     | -0.107 | 2.976E-01 | 3.695E-01 |
| CCDC181  | -0.107 | 7.532E-01 | 5.591E-01 |
| ARFGEF3  | -0.107 | 7.125E-01 | 4.233E-01 |
| IGF2BP1  | -0.107 | 8.773E-01 | 2.493E-01 |

|          |        |           |           |
|----------|--------|-----------|-----------|
| GTF2F1   | -0.107 | 9.091E-02 | 4.763E-01 |
| MYO3A    | -0.107 | 8.895E-01 | 4.538E-01 |
| TEX12    | -0.108 | 7.250E-01 | 3.417E-01 |
| RPS24    | -0.108 | 4.359E-01 | 5.205E-01 |
| WASHC4   | -0.108 | 2.240E-01 | 4.479E-01 |
| EXOSC5   | -0.108 | 4.229E-01 | 2.960E-01 |
| DCAF17   | -0.108 | 1.986E-01 | 6.508E-01 |
| MIR6752  | -0.108 | NA        | 8.817E-01 |
| MIR5191  | -0.108 | NA        | 5.513E-01 |
| MIR607   | -0.108 | NA        | 6.827E-01 |
| OR7D4    | -0.108 | NA        | 1.996E-01 |
| MIR1277  | -0.108 | NA        | 5.003E-01 |
| MIR4450  | -0.108 | NA        | 4.177E-01 |
| MIR4491  | -0.108 | NA        | 5.194E-01 |
| OR5A2    | -0.108 | NA        | 9.773E-01 |
| GAGE12H  | -0.108 | NA        | 9.065E-01 |
| TIGD5    | -0.108 | 3.453E-01 | 3.497E-01 |
| SH2D4B   | -0.108 | 7.642E-01 | 8.145E-01 |
| TBCK     | -0.108 | 3.368E-01 | 5.659E-01 |
| ASPHD1   | -0.108 | 7.380E-01 | 2.801E-01 |
| FASTKD2  | -0.108 | 1.674E-01 | 7.352E-01 |
| EXO1     | -0.108 | 5.622E-01 | 6.748E-01 |
| ADA      | -0.108 | 6.861E-01 | 5.306E-01 |
| SRA1     | -0.108 | 2.556E-01 | 6.519E-01 |
| MT-CO2   | -0.108 | 5.856E-01 | 4.325E-01 |
| PTPN11   | -0.108 | 3.452E-01 | 4.440E-01 |
| SFPQ     | -0.108 | 4.155E-02 | 3.348E-01 |
| FKBP3    | -0.108 | 2.410E-01 | 2.567E-01 |
| LPAR1    | -0.108 | 6.318E-01 | 5.975E-01 |
| MIR6081  | -0.108 | NA        | 3.379E-01 |
| AHSP     | -0.108 | 8.693E-01 | 2.358E-01 |
| PPIL4    | -0.108 | 1.596E-01 | 3.501E-01 |
| UNG      | -0.108 | 2.526E-01 | 1.083E-01 |
| FBXL4    | -0.108 | 1.974E-01 | 4.448E-01 |
| CBY1     | -0.108 | 3.160E-01 | 4.650E-01 |
| PDS5A    | -0.108 | 1.421E-01 | 2.149E-01 |
| IQCA1L   | -0.108 | NA        | 9.838E-01 |
| SHROOM2  | -0.108 | 6.190E-01 | 9.822E-01 |
| COQ4     | -0.108 | 3.184E-01 | 9.802E-01 |
| ZNF354B  | -0.108 | 3.796E-01 | 4.917E-01 |
| PRICKLE3 | -0.108 | 3.802E-01 | 2.908E-01 |
| EDRF1    | -0.108 | 2.194E-01 | 7.506E-01 |
| ULK3     | -0.108 | 3.696E-01 | 3.479E-01 |
| SLC2A8   | -0.108 | 5.084E-01 | 2.032E-01 |
| PATL2    | -0.108 | 6.822E-01 | 2.791E-01 |
| EFCAB13  | -0.108 | 5.895E-01 | 3.140E-01 |
| UTY      | -0.108 | 8.690E-01 | 7.995E-01 |
| SARNP    | -0.109 | 3.379E-01 | 6.847E-01 |
| MVB12A   | -0.109 | 3.006E-01 | 5.093E-01 |
| UBXN6    | -0.109 | 2.019E-01 | 7.422E-01 |

|            |        |           |           |
|------------|--------|-----------|-----------|
| AL133352.1 | -0.109 | 6.769E-01 | 8.222E-01 |
| STX10      | -0.109 | 2.246E-01 | 5.944E-01 |
| AC107871.1 | -0.109 | 7.972E-01 | 3.903E-01 |
| ZBTB26     | -0.109 | 2.526E-01 | 3.949E-01 |
| PITPNM2    | -0.109 | 5.177E-01 | 1.739E-01 |
| GGA3       | -0.109 | 1.515E-01 | 6.674E-01 |
| ZNF292     | -0.109 | 4.151E-01 | 7.031E-01 |
| ZNF598     | -0.109 | 1.738E-01 | 4.169E-01 |
| RCOR3      | -0.109 | 2.931E-01 | 7.326E-01 |
| CMPK2      | -0.109 | 6.849E-01 | 2.698E-01 |
| GNPDA2     | -0.109 | 2.292E-01 | 2.406E-01 |
| AC006486.1 | -0.109 | NA        | 9.361E-01 |
| ZKSCAN3    | -0.109 | 3.863E-01 | 4.598E-01 |
| FAM219B    | -0.109 | 4.471E-01 | 3.223E-01 |
| METTL25    | -0.109 | 2.157E-01 | 5.826E-01 |
| PCDH8      | -0.109 | 8.993E-01 | 9.252E-01 |
| DDX17      | -0.109 | 1.899E-01 | 5.026E-01 |
| RPL11      | -0.109 | 3.219E-01 | 6.936E-01 |
| MIR5688    | -0.109 | NA        | 3.224E-01 |
| NUBPL      | -0.109 | 2.264E-01 | 4.474E-01 |
| AC018630.6 | -0.109 | 6.620E-01 | 2.852E-01 |
| HSF2       | -0.109 | 2.985E-01 | 3.797E-01 |
| TMEM242    | -0.109 | 2.250E-01 | 2.673E-01 |
| MIR3186    | -0.109 | 8.407E-01 | 2.801E-01 |
| RPL27      | -0.109 | 3.118E-01 | 7.884E-01 |
| PNOC       | -0.109 | 8.417E-01 | 6.662E-01 |
| DGCR6      | -0.109 | 6.632E-01 | 2.804E-01 |
| POLD4      | -0.109 | 4.170E-01 | 4.197E-01 |
| DPY19L1    | -0.109 | 3.736E-01 | 2.378E-01 |
| STYK1      | -0.109 | 5.873E-01 | 2.158E-01 |
| DRG1       | -0.109 | 2.136E-01 | 7.724E-01 |
| MAP3K10    | -0.109 | 3.726E-01 | 7.754E-01 |
| MYO10      | -0.109 | 6.513E-01 | 3.972E-01 |
| NPIPB12    | -0.110 | 7.467E-01 | 7.174E-01 |
| RAB11B     | -0.110 | 2.159E-01 | 4.896E-01 |
| GPR101     | -0.110 | 8.940E-01 | 2.615E-01 |
| CHD9       | -0.110 | 3.314E-01 | 6.031E-01 |
| LCN1       | -0.110 | 8.072E-01 | 4.500E-01 |
| CCNT1      | -0.110 | 1.750E-01 | 2.028E-01 |
| HDHD3      | -0.110 | 4.338E-01 | 4.449E-01 |
| TMEM14A    | -0.110 | 3.446E-01 | 2.236E-01 |
| HLA-E      | -0.110 | 4.778E-01 | 2.939E-01 |
| STEAP2     | -0.110 | 6.839E-01 | 1.333E-01 |
| MBD6       | -0.110 | 2.551E-01 | 3.060E-01 |
| LRRC29     | -0.110 | 4.986E-01 | 8.537E-01 |
| CCDC65     | -0.110 | 3.803E-01 | 2.765E-01 |
| ZNF721     | -0.110 | 3.393E-01 | 2.957E-01 |
| PRRT1      | -0.110 | 5.791E-01 | 4.270E-01 |
| ELFN2      | -0.110 | 8.414E-01 | 2.149E-01 |
| MTHFSD     | -0.110 | 2.593E-01 | 2.824E-01 |

|           |        |           |           |
|-----------|--------|-----------|-----------|
| AMIGO2    | -0.110 | 6.839E-01 | 2.024E-01 |
| POLE      | -0.110 | 3.409E-01 | 6.064E-01 |
| ADCK1     | -0.110 | 2.478E-01 | 8.599E-01 |
| ZFYVE27   | -0.110 | 1.680E-01 | 6.037E-01 |
| DHPS      | -0.110 | 2.222E-01 | 9.526E-01 |
| ZNF500    | -0.110 | 1.517E-01 | 2.450E-01 |
| TBC1D16   | -0.110 | 4.181E-01 | 6.917E-01 |
| MGAT5     | -0.110 | 4.021E-01 | 2.111E-01 |
| INHBC     | -0.110 | 7.415E-01 | 3.901E-01 |
| PSMA2     | -0.110 | 2.313E-01 | 8.376E-01 |
| CD68      | -0.110 | 6.626E-01 | 3.481E-01 |
| DOK1      | -0.110 | 5.463E-01 | 7.520E-01 |
| GAS8      | -0.110 | 3.041E-01 | 2.757E-01 |
| TET2      | -0.110 | 3.887E-01 | 5.941E-01 |
| JAKMIP3   | -0.110 | 7.904E-01 | 8.919E-01 |
| GATAD2A   | -0.110 | 9.309E-02 | 3.769E-01 |
| NFKB1     | -0.110 | 3.093E-01 | 6.436E-01 |
| BBS10     | -0.110 | 2.848E-01 | 5.217E-01 |
| DDX28     | -0.110 | 3.378E-01 | 4.752E-01 |
| CLDND1    | -0.110 | 2.918E-01 | 6.606E-01 |
| ZNF443    | -0.110 | 5.559E-01 | 9.613E-01 |
| G2E3      | -0.111 | 2.761E-01 | 9.665E-01 |
| OR11H2    | -0.111 | NA        | 7.615E-01 |
| MIR615    | -0.111 | NA        | 7.695E-01 |
| SENP6     | -0.111 | 1.481E-01 | 7.064E-01 |
| SULT1B1   | -0.111 | 8.234E-01 | 8.062E-01 |
| PRSS21    | -0.111 | 8.635E-01 | 4.183E-01 |
| PRR13     | -0.111 | 2.284E-01 | 3.763E-01 |
| POLR1E    | -0.111 | 3.598E-01 | 4.091E-01 |
| STAC      | -0.111 | 7.959E-01 | 3.156E-01 |
| ADGRL1    | -0.111 | 6.292E-01 | 2.695E-01 |
| EIF4ENIF1 | -0.111 | 1.512E-01 | 4.592E-01 |
| VARS      | -0.111 | 2.420E-01 | 3.909E-01 |
| NAV1      | -0.111 | 5.749E-01 | 2.675E-01 |
| GPATCH2L  | -0.111 | 1.933E-01 | 5.086E-01 |
| C1QB      | -0.111 | 7.805E-01 | 1.656E-01 |
| HURC1-FNT | -0.111 | 7.801E-01 | 9.831E-01 |
| ZNF7      | -0.111 | 1.461E-01 | 9.831E-01 |
| ITPR3     | -0.111 | 5.703E-01 | 9.831E-01 |
| MIR3132   | -0.111 | NA        | 2.453E-01 |
| PGPEP1    | -0.111 | 5.299E-01 | 4.884E-01 |
| UGGT2     | -0.111 | 3.638E-01 | 4.218E-01 |
| MAP1LC3B2 | -0.111 | 2.919E-01 | 5.605E-01 |
| CFAP100   | -0.111 | 6.907E-01 | 5.365E-01 |
| VPS29     | -0.111 | 1.501E-01 | 6.879E-01 |
| KLHL8     | -0.111 | 3.206E-01 | 5.451E-01 |
| MRPL32    | -0.111 | 1.293E-01 | 1.579E-01 |
| C19orf25  | -0.111 | 3.208E-01 | 3.942E-01 |
| PARD6G    | -0.111 | 5.417E-01 | 6.580E-01 |
| ALKBH1    | -0.111 | 1.023E-01 | 2.624E-01 |

|            |        |           |           |
|------------|--------|-----------|-----------|
| KDM3B      | -0.111 | 2.044E-01 | 6.696E-01 |
| VMAC       | -0.111 | 3.708E-01 | 7.907E-01 |
| TTPAL      | -0.111 | 3.572E-01 | 4.342E-01 |
| CNPY2      | -0.111 | 3.597E-01 | 1.523E-01 |
| INSR       | -0.111 | 4.222E-01 | 6.290E-01 |
| UTP3       | -0.111 | 1.440E-01 | 8.089E-01 |
| LYPD5      | -0.111 | 6.848E-01 | 3.678E-01 |
| NF2        | -0.111 | 3.143E-01 | 1.407E-01 |
| ADCY7      | -0.111 | 7.173E-01 | 5.613E-01 |
| KCNRG      | -0.111 | 5.915E-01 | 3.703E-01 |
| EXOC7      | -0.111 | 1.691E-01 | 4.677E-01 |
| TMBIM4     | -0.111 | 3.561E-01 | 1.268E-01 |
| IL7        | -0.111 | 6.425E-01 | 2.219E-01 |
| UNK        | -0.111 | 1.984E-01 | 1.404E-01 |
| NUDT4      | -0.111 | 5.348E-01 | 4.711E-01 |
| TELO2      | -0.111 | 2.429E-01 | 2.399E-01 |
| NAA10      | -0.112 | 3.791E-01 | 3.110E-01 |
| TMEFF1     | -0.112 | 8.472E-01 | 2.247E-01 |
| ZBTB2      | -0.112 | 1.169E-01 | 5.870E-01 |
| SRPX2      | -0.112 | 6.747E-01 | 3.572E-01 |
| CELA1      | -0.112 | 8.596E-01 | 2.275E-01 |
| MIR766     | -0.112 | NA        | 2.900E-01 |
| MKS1       | -0.112 | 2.027E-01 | 7.362E-01 |
| MIR6780B   | -0.112 | NA        | 3.294E-01 |
| MIR4776-1  | -0.112 | NA        | 6.214E-01 |
| MIR4451    | -0.112 | NA        | 1.811E-01 |
| MIR4511    | -0.112 | NA        | 4.262E-01 |
| MIR3128    | -0.112 | NA        | 7.574E-01 |
| CORO1B     | -0.112 | 2.925E-01 | 2.482E-01 |
| EIF3L      | -0.112 | 3.753E-01 | 3.649E-01 |
| AC006538.2 | -0.112 | NA        | 5.714E-01 |
| KRTAP19-2  | -0.112 | NA        | 5.887E-01 |
| MIR517C    | -0.112 | NA        | 3.269E-01 |
| MIR518A1   | -0.112 | NA        | 9.655E-01 |
| OR14A16    | -0.112 | NA        | 2.711E-01 |
| OR51G2     | -0.112 | NA        | 3.153E-01 |
| MAVS       | -0.112 | 2.549E-01 | 6.059E-01 |
| MPC1       | -0.112 | 3.057E-01 | 3.552E-01 |
| SCRN2      | -0.112 | 4.466E-01 | 2.388E-01 |
| MAGEE1     | -0.112 | 6.234E-01 | 7.406E-01 |
| TAF10      | -0.112 | 2.869E-01 | 4.602E-01 |
| UBE2D3     | -0.112 | 7.331E-02 | 3.522E-01 |
| LAPTM5     | -0.112 | 7.046E-01 | 4.673E-01 |
| WDR25      | -0.112 | 2.721E-01 | 2.456E-01 |
| AP000350.4 | -0.112 | 8.472E-01 | 4.495E-01 |
| TFAP2A     | -0.112 | 6.776E-01 | 2.893E-01 |
| MBD3       | -0.112 | 3.156E-01 | 9.076E-01 |
| CDC42EP4   | -0.112 | 4.490E-01 | 3.709E-01 |
| SH2D4A     | -0.112 | 5.990E-01 | 2.917E-01 |
| PKP4       | -0.112 | 2.307E-01 | 3.008E-01 |

|            |        |           |           |
|------------|--------|-----------|-----------|
| CTPS2      | -0.112 | 2.346E-01 | 1.634E-01 |
| ARGLU1     | -0.112 | 3.923E-01 | 5.313E-01 |
| SH3BGRL3   | -0.112 | 4.192E-01 | 2.272E-01 |
| FASTKD5    | -0.113 | 2.129E-01 | 1.753E-01 |
| RAP1B      | -0.113 | 4.216E-01 | 3.970E-01 |
| MAP2K2     | -0.113 | 2.380E-01 | 9.714E-01 |
| TM4SF18    | -0.113 | 6.282E-01 | 9.716E-01 |
| PTCD2      | -0.113 | 1.708E-01 | 3.203E-01 |
| HHAT       | -0.113 | 4.895E-01 | 3.068E-01 |
| NR2C2      | -0.113 | 3.950E-01 | 7.485E-01 |
| NT5C1B     | -0.113 | 5.905E-01 | 1.541E-01 |
| WNT3       | -0.113 | 6.513E-01 | 1.752E-01 |
| STRN3      | -0.113 | 2.278E-01 | 4.571E-01 |
| PDCD11     | -0.113 | 1.721E-01 | 5.883E-01 |
| RGS1       | -0.113 | 7.214E-01 | 7.302E-01 |
| IPO11      | -0.113 | 2.265E-01 | 4.113E-01 |
| E2F4       | -0.113 | 1.615E-01 | 3.364E-01 |
| EXOSC9     | -0.113 | 1.728E-01 | 7.695E-01 |
| KCNIP4     | -0.113 | 4.484E-01 | 6.682E-01 |
| SECTM1     | -0.113 | 7.652E-01 | 7.191E-01 |
| PPP1R13L   | -0.113 | 5.191E-01 | 3.245E-01 |
| CPSF1      | -0.113 | 2.271E-01 | 6.962E-01 |
| MLH3       | -0.113 | 1.388E-01 | 3.834E-01 |
| PTGR2      | -0.113 | 4.301E-01 | 7.315E-01 |
| FAM71C     | -0.113 | NA        | 2.431E-01 |
| MED9       | -0.113 | 1.843E-01 | 9.157E-01 |
| TMEM54     | -0.113 | 4.511E-01 | 3.222E-01 |
| TRIQK      | -0.113 | 4.170E-01 | 3.152E-01 |
| ZNF211     | -0.113 | 5.020E-01 | 4.348E-01 |
| PACRGL     | -0.113 | 1.519E-01 | 7.297E-01 |
| MED21      | -0.113 | 2.288E-01 | 6.249E-01 |
| BATF       | -0.113 | 6.348E-01 | 4.422E-01 |
| MICB       | -0.113 | 6.776E-01 | 3.156E-01 |
| MED15      | -0.113 | 2.444E-01 | 3.623E-01 |
| CXorf38    | -0.113 | 2.444E-01 | 1.997E-01 |
| FKBP8      | -0.113 | 1.987E-01 | 6.011E-01 |
| MRPL23     | -0.113 | 4.709E-01 | 3.653E-01 |
| PLEKHS1    | -0.113 | 8.369E-01 | 2.880E-01 |
| EEF1AKMT3  | -0.113 | 2.995E-01 | 7.117E-01 |
| MICAL3     | -0.113 | 4.715E-01 | 3.018E-01 |
| RPS4Y2     | -0.113 | 8.786E-01 | 3.240E-01 |
| GPN3       | -0.113 | 1.968E-01 | 3.418E-01 |
| AL109827.1 | -0.113 | NA        | 5.919E-01 |
| MIR4522    | -0.113 | NA        | 1.359E-01 |
| OR6M1      | -0.113 | NA        | 4.567E-01 |
| MIR578     | -0.113 | NA        | 9.568E-01 |
| CCDC71     | -0.113 | 2.149E-01 | 9.546E-01 |
| CHRNA6     | -0.113 | 7.759E-01 | 7.120E-01 |
| SRPK1      | -0.113 | 2.399E-01 | 3.034E-01 |
| PYURF      | -0.113 | 3.772E-01 | 5.359E-01 |

|            |        |           |           |
|------------|--------|-----------|-----------|
| ZNF24      | -0.114 | 1.492E-01 | 4.227E-01 |
| ZCCHC8     | -0.114 | 1.494E-01 | 2.368E-01 |
| CNKSR3     | -0.114 | 5.935E-01 | 2.549E-01 |
| SLC5A10    | -0.114 | 6.799E-01 | 2.646E-01 |
| KHSRP      | -0.114 | 7.018E-02 | 6.890E-01 |
| RPS6KA5    | -0.114 | 5.300E-01 | 6.877E-01 |
| NCDN       | -0.114 | 1.114E-01 | 5.296E-01 |
| MIR3936    | -0.114 | 6.169E-01 | 5.415E-01 |
| HTR1B      | -0.114 | 7.910E-01 | 6.621E-01 |
| ESCO1      | -0.114 | 1.435E-01 | 6.059E-01 |
| CARD16     | -0.114 | 6.551E-01 | 1.125E-01 |
| RBBP8      | -0.114 | 5.475E-01 | 3.067E-01 |
| MIR26B     | -0.114 | 7.560E-01 | 5.742E-01 |
| CDC40      | -0.114 | 2.149E-01 | 2.870E-01 |
| ASB1       | -0.114 | 2.986E-01 | 5.165E-01 |
| APBA3      | -0.114 | 1.819E-01 | 2.450E-01 |
| FOXP3      | -0.114 | 6.413E-01 | 5.031E-01 |
| FBXL12     | -0.114 | 1.842E-01 | 2.202E-01 |
| CCDC122    | -0.114 | 4.384E-01 | 2.153E-01 |
| LILRB2     | -0.114 | 7.586E-01 | 3.267E-01 |
| HIST1H3I   | -0.114 | 7.698E-01 | 2.710E-01 |
| MBLAC2     | -0.114 | 3.662E-01 | 4.475E-01 |
| SNN        | -0.114 | 4.828E-01 | 8.802E-01 |
| HEATR3     | -0.114 | 1.451E-01 | 8.516E-01 |
| RPS6       | -0.114 | 4.593E-01 | 9.444E-01 |
| CLEC18A    | -0.114 | 7.095E-01 | 2.496E-01 |
| MFHAS1     | -0.114 | 5.099E-01 | 8.314E-01 |
| PPP1R9A    | -0.114 | 7.759E-01 | 1.451E-01 |
| PPP2CA     | -0.114 | 6.706E-02 | 5.751E-01 |
| METAP1     | -0.114 | 3.169E-01 | 1.682E-01 |
| ZDHHC23    | -0.114 | 4.745E-01 | 1.641E-01 |
| SNX18      | -0.114 | 2.961E-01 | 3.093E-01 |
| NCOR1      | -0.114 | 2.546E-01 | 4.810E-01 |
| DNAJC22    | -0.115 | 7.551E-01 | 6.273E-01 |
| MSL3       | -0.115 | 8.669E-02 | 6.359E-01 |
| SVIP       | -0.115 | 5.364E-01 | 1.647E-01 |
| MIR623     | -0.115 | 8.599E-01 | 5.028E-01 |
| TWF1       | -0.115 | 3.480E-01 | 2.897E-01 |
| PHLDB2     | -0.115 | 6.098E-01 | 1.792E-01 |
| ANKS3      | -0.115 | 3.795E-01 | 4.937E-01 |
| GLI3       | -0.115 | 6.595E-01 | 1.530E-01 |
| PTTG1      | -0.115 | 5.364E-01 | 6.985E-01 |
| MIR30E     | -0.115 | NA        | 4.254E-01 |
| CCDC59     | -0.115 | 1.356E-01 | 5.582E-01 |
| DEFB104B   | -0.115 | NA        | 7.441E-01 |
| RNF141     | -0.115 | 3.175E-01 | 6.074E-01 |
| GIMAP4     | -0.115 | 6.236E-01 | 3.203E-01 |
| S100A11    | -0.115 | 4.715E-01 | 2.544E-01 |
| POLR1D     | -0.115 | 1.878E-01 | 5.172E-01 |
| AC008764.4 | -0.115 | 6.781E-01 | 6.031E-01 |



|          |        |           |           |
|----------|--------|-----------|-----------|
| NDUFA10  | -0.115 | 2.051E-01 | 9.706E-01 |
| CMTM4    | -0.115 | 5.419E-01 | 9.729E-01 |
| SETDB2   | -0.115 | 2.961E-01 | 9.728E-01 |
| BMP2K    | -0.115 | 4.841E-01 | 9.711E-01 |
| LGI4     | -0.115 | 6.817E-01 | 2.169E-01 |
| AKR1C2   | -0.115 | 8.210E-01 | 3.221E-01 |
| ATP1B1   | -0.115 | 6.609E-01 | 4.420E-01 |
| PPP2R2B  | -0.115 | 7.851E-01 | 3.218E-01 |
| PRR3     | -0.115 | 2.978E-01 | 8.138E-01 |
| IL27RA   | -0.115 | 6.560E-01 | 2.771E-01 |
| AGPAT2   | -0.115 | 5.633E-01 | 1.300E-01 |
| MIR6736  | -0.115 | NA        | 7.310E-01 |
| WDR18    | -0.115 | 3.225E-01 | 9.497E-01 |
| SLFN14   | -0.115 | 7.722E-01 | 5.816E-01 |
| RHBDD3   | -0.115 | 2.986E-01 | 1.260E-01 |
| MPDU1    | -0.115 | 2.624E-01 | 9.174E-01 |
| RSL24D1  | -0.115 | 1.046E-01 | 3.816E-01 |
| TRAPPC3L | -0.115 | 7.433E-01 | 2.335E-01 |
| ANKRD10  | -0.116 | 3.674E-01 | 1.734E-01 |
| GNPNAT1  | -0.116 | 2.726E-01 | 7.771E-01 |
| ZNF714   | -0.116 | 5.655E-01 | 2.991E-01 |
| NAPSA    | -0.116 | 6.048E-01 | 7.232E-01 |
| PMP2     | -0.116 | 8.448E-01 | 3.919E-01 |
| FAM213B  | -0.116 | 4.168E-01 | 8.395E-01 |
| FUT8     | -0.116 | 4.801E-01 | 7.124E-01 |
| AK6      | -0.116 | 1.296E-01 | 6.313E-01 |
| ERCC6L   | -0.116 | 5.342E-01 | 1.707E-01 |
| KCNS3    | -0.116 | 6.516E-01 | 1.869E-01 |
| WISP3    | -0.116 | 8.038E-01 | 5.998E-01 |
| DBT      | -0.116 | 2.837E-01 | 6.297E-01 |
| MIEF1    | -0.116 | 1.584E-01 | 2.545E-01 |
| KLK6     | -0.116 | 8.858E-01 | 7.163E-01 |
| IFI44L   | -0.116 | 7.591E-01 | 3.110E-01 |
| PRKX     | -0.116 | 4.733E-01 | 7.295E-01 |
| CLN5     | -0.116 | 2.444E-01 | 3.272E-01 |
| NLRP14   | -0.116 | 7.764E-01 | 4.970E-01 |
| EXOC3L1  | -0.116 | 3.840E-01 | 2.447E-01 |
| OLA1     | -0.116 | 1.547E-01 | 7.263E-01 |
| SMPDL3A  | -0.116 | 5.697E-01 | 6.060E-01 |
| CYB5B    | -0.116 | 3.056E-01 | 6.658E-01 |
| MRPL4    | -0.116 | 2.462E-01 | 4.111E-01 |
| NKX6-2   | -0.116 | 8.206E-01 | 2.655E-01 |
| PITPNB   | -0.116 | 1.693E-01 | 6.640E-01 |
| R3HDM4   | -0.116 | 1.844E-01 | 2.801E-01 |
| USP40    | -0.116 | 3.710E-01 | 8.345E-01 |
| MIR7155  | -0.116 | NA        | 5.242E-01 |
| CRYGB    | -0.116 | NA        | 3.872E-01 |
| FERD3L   | -0.116 | NA        | 2.793E-01 |
| B4GALNT4 | -0.116 | 7.998E-01 | 3.093E-01 |
| C9orf16  | -0.116 | 4.644E-01 | 9.226E-01 |

|            |        |           |           |
|------------|--------|-----------|-----------|
| DDIAS      | -0.116 | 4.801E-01 | 1.963E-01 |
| WDFY1      | -0.116 | 2.179E-01 | 4.991E-01 |
| HRC        | -0.116 | 6.869E-01 | 8.470E-01 |
| SOX12      | -0.116 | 5.001E-01 | 6.159E-01 |
| ROMO1      | -0.116 | 4.334E-01 | 2.099E-01 |
| SNCAIP     | -0.116 | 7.143E-01 | 4.630E-01 |
| SPINK9     | -0.117 | 7.585E-01 | 8.006E-01 |
| ZNF564     | -0.117 | 2.742E-01 | 4.835E-01 |
| SMIM20     | -0.117 | 2.105E-01 | 5.580E-01 |
| PHLDA1     | -0.117 | 6.387E-01 | 8.518E-01 |
| LAMP3      | -0.117 | 6.904E-01 | 4.524E-01 |
| FBXO16     | -0.117 | 5.876E-01 | 6.972E-01 |
| OR2J3      | -0.117 | 8.999E-01 | 4.875E-01 |
| TICRR      | -0.117 | 4.840E-01 | 4.876E-01 |
| B3GNTL1    | -0.117 | 3.370E-01 | 5.607E-01 |
| UTRN       | -0.117 | 5.204E-01 | 5.859E-01 |
| LEPROTL1   | -0.117 | 1.597E-01 | 4.723E-01 |
| GAREM1     | -0.117 | 6.127E-01 | 2.265E-01 |
| LMNB2      | -0.117 | 3.623E-01 | 6.147E-01 |
| RAB34      | -0.117 | 6.081E-01 | 2.175E-01 |
| METTTL26   | -0.117 | 4.107E-01 | 2.812E-01 |
| RSPH6A     | -0.117 | 8.262E-01 | 2.515E-01 |
| TSSK4      | -0.117 | 4.868E-01 | 5.138E-01 |
| KLF7       | -0.117 | 5.187E-01 | 1.924E-01 |
| FOXO1      | -0.117 | 3.970E-01 | 3.192E-01 |
| SUCLA2     | -0.117 | 3.043E-01 | 2.954E-01 |
| NOP9       | -0.117 | 1.867E-01 | 1.199E-01 |
| RMDN1      | -0.117 | 1.393E-01 | 4.532E-01 |
| ZNF326     | -0.117 | 1.265E-01 | 3.330E-01 |
| MKNK1      | -0.117 | 1.155E-01 | 7.467E-01 |
| DUSP5      | -0.117 | 6.616E-01 | 2.898E-01 |
| SLC7A13    | -0.117 | 8.932E-01 | 6.182E-01 |
| DCP1A      | -0.117 | 1.954E-01 | 1.985E-01 |
| MIR185     | -0.117 | NA        | 6.660E-01 |
| ATP5O      | -0.117 | 2.487E-01 | 2.527E-01 |
| FZD3       | -0.117 | 5.404E-01 | 1.753E-01 |
| NUDT22     | -0.117 | 2.232E-01 | 3.975E-01 |
| MFSD2A     | -0.117 | 6.030E-01 | 8.359E-01 |
| POLR2D     | -0.117 | 1.090E-01 | 1.232E-01 |
| FBXO44     | -0.117 | 3.708E-01 | 9.503E-01 |
| MCU        | -0.117 | 1.738E-01 | 9.524E-01 |
| TMEM144    | -0.117 | 3.815E-01 | 9.546E-01 |
| CDC25B     | -0.117 | 6.300E-01 | 5.388E-01 |
| MIR548N    | -0.118 | NA        | 1.701E-01 |
| MIR3160-1  | -0.118 | NA        | 4.841E-01 |
| AC138647.1 | -0.118 | NA        | 6.540E-01 |
| RBM6       | -0.118 | 3.607E-01 | 3.470E-01 |
| COMMD5     | -0.118 | 1.956E-01 | 4.234E-01 |
| ASCL5      | -0.118 | 7.154E-01 | 9.741E-01 |
| RUFY3      | -0.118 | 2.152E-01 | 3.538E-01 |

|            |        |           |           |
|------------|--------|-----------|-----------|
| COX5A      | -0.118 | 2.322E-01 | 5.520E-01 |
| NFXL1      | -0.118 | 3.065E-01 | 3.111E-01 |
| SFSWAP     | -0.118 | 1.368E-01 | 4.693E-01 |
| AL669918.1 | -0.118 | 6.912E-01 | 1.121E-01 |
| METTTL21C  | -0.118 | 8.595E-01 | 4.501E-01 |
| RPL15      | -0.118 | 2.338E-01 | 3.373E-01 |
| BBOX1      | -0.118 | 7.998E-01 | 3.147E-01 |
| MGAT4C     | -0.118 | 8.505E-01 | 2.632E-01 |
| CNTRL      | -0.118 | 2.889E-01 | 1.351E-01 |
| TBC1D30    | -0.118 | 6.285E-01 | 4.356E-01 |
| CCDC148    | -0.118 | 5.682E-01 | 3.303E-01 |
| CLPP       | -0.118 | 2.195E-01 | 9.243E-01 |
| TBRG4      | -0.118 | 1.523E-01 | 1.470E-01 |
| MMP3       | -0.118 | 8.211E-01 | 5.483E-01 |
| ESRRA      | -0.118 | 2.307E-01 | 3.560E-01 |
| NDUFA3     | -0.118 | 4.067E-01 | 3.661E-01 |
| MB21D1     | -0.118 | 5.964E-01 | 6.798E-01 |
| MED11      | -0.118 | 2.435E-01 | 5.288E-01 |
| UQCRC2     | -0.118 | 1.761E-01 | 8.332E-01 |
| SGK3       | -0.118 | 2.051E-01 | 2.934E-01 |
| ISCA2      | -0.119 | 1.669E-01 | 2.364E-01 |
| CCT8       | -0.119 | 1.172E-01 | 6.886E-01 |
| COMMD8     | -0.119 | 1.873E-01 | 2.537E-01 |
| DBF4       | -0.119 | 3.043E-01 | 5.662E-01 |
| BLACE      | -0.119 | NA        | 1.999E-01 |
| CD163L1    | -0.119 | 6.814E-01 | 4.641E-01 |
| ARMC2      | -0.119 | 1.838E-01 | 2.169E-01 |
| CRNN       | -0.119 | 9.098E-01 | 7.040E-01 |
| NDUFS4     | -0.119 | 2.427E-01 | 1.839E-01 |
| FAM83B     | -0.119 | 6.549E-01 | 4.917E-01 |
| RIOX1      | -0.119 | 2.750E-01 | 9.518E-01 |
| ZNF207     | -0.119 | 3.605E-02 | 3.518E-01 |
| AC002429.2 | -0.119 | 8.448E-01 | 2.342E-01 |
| FAAP20     | -0.119 | 3.408E-01 | 6.459E-01 |
| MAPK1IP1L  | -0.119 | 9.070E-02 | 3.494E-01 |
| GOPC       | -0.119 | 1.579E-01 | 2.637E-01 |
| BTBD7      | -0.119 | 1.844E-01 | 2.448E-01 |
| MIR548T    | -0.119 | NA        | 4.226E-01 |
| USMG5      | -0.119 | 2.883E-01 | 5.195E-01 |
| E2F7       | -0.119 | 6.158E-01 | 2.720E-01 |
| PRSS48     | -0.119 | 8.240E-01 | 3.631E-01 |
| BECN2      | -0.119 | 8.249E-01 | 8.755E-01 |
| CCDC66     | -0.119 | 1.669E-01 | 1.406E-01 |
| MSH4       | -0.119 | 7.290E-01 | 3.326E-01 |
| MIR4419A   | -0.119 | NA        | 3.978E-01 |
| HTR5A      | -0.119 | NA        | 2.222E-01 |
| PYCR2      | -0.119 | 2.201E-01 | 3.157E-01 |
| NOC4L      | -0.119 | 2.576E-01 | 7.898E-01 |
| SLC12A6    | -0.119 | 4.948E-01 | 1.832E-01 |
| HOXA11     | -0.119 | 6.560E-01 | 5.165E-01 |

|           |        |           |           |
|-----------|--------|-----------|-----------|
| PDLIM1    | -0.119 | 4.579E-01 | 7.627E-01 |
| CBWD6     | -0.120 | 4.082E-01 | 2.932E-01 |
| SMAD9     | -0.120 | 6.314E-01 | 4.964E-01 |
| PRKAR1B   | -0.120 | 4.976E-01 | 1.691E-01 |
| C17orf113 | -0.120 | 5.679E-01 | 4.571E-01 |
| KRT74     | -0.120 | 8.374E-01 | 1.552E-01 |
| RPL3L     | -0.120 | 6.395E-01 | 2.730E-01 |
| CLN8      | -0.120 | 2.642E-01 | 4.481E-01 |
| FIGNL1    | -0.120 | 3.916E-01 | 1.793E-01 |
| TSPAN31   | -0.120 | 2.964E-01 | 1.949E-01 |
| NDUFA8    | -0.120 | 2.211E-01 | 1.799E-01 |
| SERPINC1  | -0.120 | 7.685E-01 | 4.701E-01 |
| VANGL2    | -0.120 | 7.240E-01 | 4.970E-01 |
| SLA       | -0.120 | 7.013E-01 | 5.534E-01 |
| FPGS      | -0.120 | 2.823E-01 | 1.429E-01 |
| AHSA2     | -0.120 | 4.966E-01 | 4.993E-01 |
| FAM13B    | -0.120 | 3.544E-01 | 2.594E-01 |
| NIN       | -0.120 | 2.407E-01 | 3.380E-01 |
| TM7SF3    | -0.120 | 4.820E-01 | 4.786E-01 |
| PREP      | -0.120 | 1.893E-01 | 4.758E-01 |
| ZNF208    | -0.120 | 8.217E-01 | 5.621E-01 |
| HDAC3     | -0.120 | 7.416E-02 | 4.803E-01 |
| CHMP7     | -0.120 | 1.782E-01 | 4.250E-01 |
| DUOXA1    | -0.120 | 6.710E-01 | 2.899E-01 |
| VWA5B1    | -0.120 | 8.570E-01 | 3.520E-01 |
| MEF2B     | -0.120 | 5.713E-01 | 6.198E-01 |
| ZNF44     | -0.120 | 6.413E-01 | 5.261E-01 |
| JAK2      | -0.120 | 5.048E-01 | 2.244E-01 |
| YAF2      | -0.120 | 1.137E-01 | 2.739E-01 |
| MIR548AK  | -0.120 | NA        | 3.131E-01 |
| MIR519D   | -0.120 | NA        | 5.175E-01 |
| MIR1294   | -0.120 | NA        | 4.459E-01 |
| OR4F21    | -0.120 | NA        | 7.405E-01 |
| CLDN14    | -0.120 | 7.380E-01 | 3.361E-01 |
| BLCAP     | -0.120 | 4.223E-01 | 1.358E-01 |
| NCOA5     | -0.121 | 1.027E-01 | 2.337E-01 |
| RAD17     | -0.121 | 6.772E-02 | 3.973E-01 |
| C11orf98  | -0.121 | 2.611E-01 | 5.049E-01 |
| ANKK1     | -0.121 | 7.453E-01 | 1.718E-01 |
| CEP57L1   | -0.121 | 2.305E-01 | 3.302E-01 |
| BSG       | -0.121 | 2.508E-01 | 9.805E-01 |
| PCSK4     | -0.121 | 6.351E-01 | 9.805E-01 |
| ATP4B     | -0.121 | 8.245E-01 | 9.805E-01 |
| PYDC2     | -0.121 | NA        | 9.805E-01 |
| N4BP2L1   | -0.121 | 4.522E-01 | 9.789E-01 |
| ZC3H12A   | -0.121 | 6.190E-01 | 9.787E-01 |
| TTC14     | -0.121 | 3.090E-01 | 9.787E-01 |
| SRRD      | -0.121 | 1.350E-01 | 9.764E-01 |
| SRSF11    | -0.121 | 1.984E-01 | 9.759E-01 |
| GIGYF1    | -0.121 | 2.222E-01 | 6.258E-02 |

|          |        |           |           |
|----------|--------|-----------|-----------|
| BOLA2B   | -0.121 | 5.299E-01 | 6.442E-01 |
| KCNE1B   | -0.121 | 8.514E-01 | 6.827E-01 |
| COL21A1  | -0.121 | 7.351E-01 | 3.869E-01 |
| LCORL    | -0.121 | 2.276E-01 | 1.866E-01 |
| LAT      | -0.121 | 5.429E-01 | 1.738E-01 |
| TAS2R5   | -0.121 | 6.769E-01 | 1.718E-01 |
| ZNF57    | -0.121 | 2.259E-01 | 5.605E-01 |
| METTLL22 | -0.121 | 3.094E-01 | 5.100E-01 |
| WRAP53   | -0.121 | 2.818E-01 | 2.884E-01 |
| TSHZ2    | -0.121 | 6.579E-01 | 1.403E-01 |
| TMEM260  | -0.121 | 1.387E-01 | 5.178E-01 |
| TOLLIP   | -0.121 | 2.900E-01 | 1.828E-01 |
| WDR12    | -0.122 | 1.492E-01 | 3.441E-01 |
| SLF1     | -0.122 | 2.611E-01 | 6.566E-01 |
| STRADA   | -0.122 | 2.395E-01 | 2.930E-01 |
| N4BP2    | -0.122 | 3.560E-01 | 5.589E-01 |
| RAPGEFL1 | -0.122 | 6.816E-01 | 7.945E-01 |
| GOLGA8J  | -0.122 | NA        | 4.973E-01 |
| PRMT9    | -0.122 | 1.523E-01 | 3.226E-01 |
| FXN      | -0.122 | 2.627E-01 | 5.794E-01 |
| RBL2     | -0.122 | 3.219E-01 | 2.978E-01 |
| CD247    | -0.122 | 6.960E-01 | 3.942E-01 |
| RCBTB1   | -0.122 | 3.835E-01 | 6.351E-01 |
| CPNE8    | -0.122 | 6.972E-01 | 2.610E-01 |
| RBM14    | -0.122 | 2.607E-02 | 6.344E-01 |
| JADE2    | -0.122 | 5.223E-01 | 4.410E-01 |
| ANKHD1   | -0.122 | 1.500E-01 | 5.049E-01 |
| ZBED4    | -0.122 | 1.973E-01 | 2.468E-01 |
| WDR74    | -0.122 | 2.131E-01 | 7.668E-01 |
| UGCG     | -0.122 | 3.736E-01 | 6.829E-01 |
| CDC7     | -0.122 | 4.244E-01 | 9.070E-01 |
| QARS     | -0.122 | 1.899E-01 | 9.091E-01 |
| PPTC7    | -0.122 | 2.476E-01 | 1.285E-01 |
| MCOLN2   | -0.122 | 7.044E-01 | 3.925E-01 |
| SMPDL3B  | -0.122 | 7.038E-01 | 8.823E-01 |
| MT-CYB   | -0.122 | 6.145E-01 | 1.192E-01 |
| MIR5582  | -0.122 | NA        | 7.683E-01 |
| ZCRB1    | -0.122 | 9.960E-02 | 7.979E-02 |
| FAM71F2  | -0.122 | 6.167E-01 | 8.132E-01 |
| PTRHD1   | -0.122 | 2.516E-01 | 6.194E-01 |
| TDP2     | -0.122 | 2.446E-01 | 1.887E-01 |
| TSKS     | -0.122 | 7.794E-01 | 1.703E-01 |
| AGTR1    | -0.122 | 7.907E-01 | 8.276E-01 |
| NHSL1    | -0.122 | 4.024E-01 | 7.164E-01 |
| SMIM6    | -0.122 | 7.685E-01 | 8.243E-01 |
| SNRPE    | -0.122 | 1.526E-01 | 7.655E-02 |
| WDHD1    | -0.122 | 4.199E-01 | 3.256E-01 |
| ETFRF1   | -0.122 | 2.540E-01 | 2.596E-01 |
| ALG14    | -0.122 | 1.364E-01 | 1.980E-01 |
| NME2     | -0.122 | 2.418E-01 | 2.439E-01 |

|            |        |           |           |
|------------|--------|-----------|-----------|
| FBXL15     | -0.123 | 4.064E-01 | 1.283E-01 |
| PSME1      | -0.123 | 2.528E-01 | 7.209E-01 |
| GXYLT1     | -0.123 | 2.503E-01 | 4.627E-01 |
| THAP6      | -0.123 | 7.285E-02 | 2.024E-01 |
| PGLYRP1    | -0.123 | 7.426E-01 | 4.838E-01 |
| IFNL1      | -0.123 | 8.369E-01 | 3.223E-01 |
| RBMX       | -0.123 | 3.147E-02 | 1.740E-01 |
| MRS2       | -0.123 | 2.648E-01 | 7.040E-01 |
| VPS28      | -0.123 | 2.871E-01 | 5.436E-01 |
| PSMB1      | -0.123 | 1.880E-01 | 5.523E-01 |
| DAPL1      | -0.123 | 8.575E-01 | 6.285E-01 |
| ZNF511     | -0.123 | 2.096E-01 | 1.917E-01 |
| SH2B2      | -0.123 | 4.988E-01 | 6.960E-01 |
| SLC38A4    | -0.123 | 8.344E-01 | 3.416E-01 |
| ZNF14      | -0.123 | 3.056E-01 | 4.169E-01 |
| SPRY2      | -0.123 | 5.943E-01 | 2.537E-01 |
| STK25      | -0.123 | 1.415E-01 | 6.306E-01 |
| MAP2K4     | -0.123 | 1.351E-01 | 3.691E-01 |
| NR1H3      | -0.123 | 4.975E-01 | 3.166E-01 |
| GATD1      | -0.123 | 2.444E-01 | 4.135E-01 |
| MIR6894    | -0.123 | NA        | 4.860E-01 |
| MIR340     | -0.123 | NA        | 4.149E-01 |
| NPHP3      | -0.123 | 2.569E-01 | 4.826E-01 |
| RPSA       | -0.123 | 3.348E-01 | 2.283E-01 |
| TBC1D32    | -0.124 | 4.062E-01 | 6.539E-01 |
| SUPT20H    | -0.124 | 1.838E-01 | 2.084E-01 |
| ZNF257     | -0.124 | 7.274E-01 | 2.051E-01 |
| POGZ       | -0.124 | 2.819E-01 | 4.357E-01 |
| CCDC144NL  | -0.124 | 8.583E-01 | 4.787E-01 |
| HAVCR2     | -0.124 | 6.950E-01 | 2.137E-01 |
| XRCC3      | -0.124 | 2.931E-01 | 9.538E-01 |
| CCDC34     | -0.124 | 3.679E-01 | 9.601E-01 |
| AC006978.2 | -0.124 | 6.638E-01 | 9.604E-01 |
| HNRNPD     | -0.124 | 1.132E-01 | 7.754E-01 |
| SMCO1      | -0.124 | 7.209E-01 | 7.024E-01 |
| DNAJC17    | -0.124 | 2.135E-01 | 1.172E-01 |
| GALNT9     | -0.124 | 7.910E-01 | 6.578E-01 |
| HNRNPDL    | -0.124 | 6.757E-02 | 1.145E-01 |
| NT5C3A     | -0.124 | 1.552E-01 | 2.726E-01 |
| TEF        | -0.124 | 3.383E-01 | 4.630E-01 |
| IQCF6      | -0.124 | 8.794E-01 | 1.028E-01 |
| GLUD2      | -0.124 | 5.489E-01 | 8.986E-02 |
| MRPS26     | -0.124 | 2.675E-01 | 2.226E-01 |
| PBK        | -0.124 | 5.244E-01 | 1.265E-01 |
| HSPD1      | -0.124 | 2.573E-01 | 2.717E-01 |
| ZNF205     | -0.124 | 2.613E-01 | 3.448E-01 |
| ZFP37      | -0.124 | 6.669E-01 | 2.749E-01 |
| PTK2       | -0.124 | 2.354E-01 | 3.296E-01 |
| ZNRF3      | -0.124 | 6.572E-01 | 9.291E-01 |
| EIF3F      | -0.124 | 1.418E-01 | 6.089E-01 |

|          |        |           |           |
|----------|--------|-----------|-----------|
| EVC2     | -0.124 | 6.799E-01 | 3.581E-01 |
| CDCA7    | -0.124 | 6.019E-01 | 1.695E-01 |
| ATP5S    | -0.124 | 1.180E-01 | 6.109E-01 |
| DOK6     | -0.124 | 7.199E-01 | 6.452E-01 |
| MIR1286  | -0.124 | NA        | 5.208E-01 |
| KRTAP4-2 | -0.124 | NA        | 2.543E-01 |
| GPR132   | -0.124 | 6.557E-01 | 3.959E-01 |
| PERM1    | -0.124 | 6.582E-01 | 9.797E-01 |
| BTN3A1   | -0.125 | 4.320E-01 | 9.797E-01 |
| CABLES1  | -0.125 | 6.108E-01 | 9.797E-01 |
| INTS9    | -0.125 | 1.429E-01 | 2.690E-01 |
| PITPNM1  | -0.125 | 3.050E-01 | 6.545E-01 |
| HOMER3   | -0.125 | 4.442E-01 | 9.187E-01 |
| TEX48    | -0.125 | 8.371E-01 | 1.247E-01 |
| MSH3     | -0.125 | 1.876E-01 | 3.552E-01 |
| TOMM20L  | -0.125 | 4.808E-01 | 2.537E-01 |
| TMEM5    | -0.125 | 1.221E-01 | 5.221E-01 |
| ZCCHC13  | -0.125 | NA        | 3.112E-01 |
| MIR1305  | -0.125 | NA        | 8.624E-01 |
| MIR4654  | -0.125 | NA        | 7.097E-01 |
| MIR4696  | -0.125 | NA        | 2.702E-01 |
| OR4A5    | -0.125 | NA        | 7.405E-01 |
| OR5K3    | -0.125 | NA        | 5.122E-01 |
| OR5M8    | -0.125 | NA        | 2.251E-01 |
| RHD      | -0.125 | 6.543E-01 | 6.027E-01 |
| AP1S3    | -0.125 | 5.617E-01 | 8.906E-02 |
| SSSCA1   | -0.125 | 3.184E-01 | 3.024E-01 |
| TRIM5    | -0.125 | 2.917E-01 | 6.297E-01 |
| SERPINB9 | -0.125 | 6.727E-01 | 2.246E-01 |
| MIR4768  | -0.125 | 7.528E-01 | 5.427E-01 |
| ZNF586   | -0.125 | 2.197E-01 | 4.898E-01 |
| TMC4     | -0.125 | 6.231E-01 | 6.094E-01 |
| MAP2K7   | -0.125 | 7.797E-02 | 7.734E-02 |
| ERICH3   | -0.125 | 8.204E-01 | 3.877E-02 |
| NOP58    | -0.125 | 1.224E-01 | 4.374E-01 |
| TYK2     | -0.125 | 1.212E-01 | 1.136E-01 |
| KLC1     | -0.125 | 1.523E-01 | 7.188E-02 |
| UBLCP1   | -0.125 | 2.347E-01 | 3.054E-01 |
| ADORA2A  | -0.125 | 6.288E-01 | 2.869E-01 |
| SOWAHC   | -0.125 | 5.246E-01 | 3.634E-01 |
| PTPRK    | -0.125 | 3.587E-01 | 5.844E-01 |
| SMARCB1  | -0.125 | 1.437E-01 | 2.192E-01 |
| TGDS     | -0.125 | 1.122E-01 | 5.010E-01 |
| ABCG5    | -0.125 | 7.057E-01 | 5.306E-01 |
| RIOK1    | -0.125 | 2.329E-01 | 1.327E-01 |
| CABP7    | -0.125 | 7.492E-01 | 6.917E-01 |
| CDC25C   | -0.125 | 4.427E-01 | 9.317E-01 |
| SULT1C3  | -0.125 | NA        | 9.364E-01 |
| MIR6779  | -0.125 | NA        | 6.508E-01 |
| MIR4777  | -0.126 | NA        | 9.431E-01 |

|            |        |           |           |
|------------|--------|-----------|-----------|
| ZDHHC21    | -0.126 | 3.477E-01 | 1.517E-01 |
| GPR35      | -0.126 | 6.805E-01 | 6.654E-01 |
| AC008575.1 | -0.126 | NA        | 2.259E-01 |
| GSPT2      | -0.126 | 6.571E-01 | 1.608E-01 |
| BGLAP      | -0.126 | 5.860E-01 | 3.580E-01 |
| DZANK1     | -0.126 | 3.661E-01 | 3.069E-01 |
| BPIFB6     | -0.126 | NA        | 7.663E-01 |
| RNASEH2C   | -0.126 | 3.527E-01 | 2.738E-01 |
| RNFT2      | -0.126 | 5.985E-01 | 1.453E-01 |
| MRPS17     | -0.126 | 2.962E-01 | 2.445E-01 |
| SRFBP1     | -0.126 | 1.836E-01 | 5.308E-01 |
| ARHGEF3    | -0.126 | 2.790E-01 | 4.312E-01 |
| SUGP2      | -0.126 | 1.369E-01 | 1.197E-01 |
| DDX39A     | -0.126 | 2.091E-01 | 3.136E-01 |
| LY6G5C     | -0.126 | 4.192E-01 | 1.469E-01 |
| UQCC1      | -0.126 | 9.047E-02 | 9.640E-01 |
| MIR151A    | -0.126 | NA        | 9.708E-01 |
| MIR4729    | -0.126 | NA        | 8.922E-01 |
| MIR516A1   | -0.126 | NA        | 1.406E-01 |
| C17orf97   | -0.126 | 5.494E-01 | 7.105E-01 |
| QTNF3-AMA  | -0.126 | 6.814E-01 | 2.026E-01 |
| CDH6       | -0.126 | 5.596E-01 | 4.138E-01 |
| CNFN       | -0.126 | 7.296E-01 | 1.013E-01 |
| NR2F6      | -0.126 | 3.733E-01 | 4.943E-01 |
| ELOVL4     | -0.126 | 7.390E-01 | 5.912E-01 |
| SPSB2      | -0.126 | 3.993E-01 | 3.141E-01 |
| ELAC2      | -0.126 | 1.036E-01 | 7.278E-01 |
| MYO1B      | -0.126 | 5.953E-01 | 4.525E-01 |
| CCAR1      | -0.126 | 7.802E-02 | 6.874E-01 |
| SRP14      | -0.127 | 7.296E-02 | 1.593E-01 |
| 44084.000  | -0.127 | 2.914E-01 | 1.716E-01 |
| ABHD6      | -0.127 | 3.625E-01 | 3.049E-01 |
| SCMH1      | -0.127 | 3.293E-01 | 5.355E-01 |
| HOOK2      | -0.127 | 3.217E-01 | 3.660E-01 |
| CTRL       | -0.127 | 6.318E-01 | 7.073E-01 |
| ZC3H7B     | -0.127 | 1.289E-01 | 1.354E-01 |
| SIGLECL1   | -0.127 | NA        | 4.657E-01 |
| TMEM26     | -0.127 | 5.909E-01 | 2.123E-01 |
| FNBP4      | -0.127 | 2.045E-01 | 7.679E-01 |
| ZNF645     | -0.127 | NA        | 1.780E-01 |
| LRRTM3     | -0.127 | 8.758E-01 | 4.075E-01 |
| PROX1      | -0.127 | 7.228E-01 | 1.486E-01 |
| ACR        | -0.127 | 6.847E-01 | 5.855E-01 |
| E4F1       | -0.127 | 1.978E-01 | 7.100E-01 |
| LTB        | -0.127 | 7.196E-01 | 3.480E-01 |
| CHRNE      | -0.127 | 5.895E-01 | 6.373E-01 |
| GYG2       | -0.127 | 7.037E-01 | 2.353E-01 |
| RSPH3      | -0.127 | 1.713E-01 | 2.045E-01 |
| NOS1AP     | -0.127 | 6.311E-01 | 2.900E-01 |
| LARS       | -0.127 | 7.349E-02 | 6.397E-01 |



|            |        |           |           |
|------------|--------|-----------|-----------|
| PPIAL4E    | -0.127 | NA        | 3.405E-01 |
| UBE2L3     | -0.127 | 1.161E-01 | 2.552E-01 |
| LY6G5B     | -0.127 | 4.076E-01 | 3.651E-01 |
| ODF3B      | -0.127 | 5.676E-01 | 1.677E-01 |
| TP53RK     | -0.127 | 1.906E-01 | 7.836E-01 |
| DENND5B    | -0.127 | 6.017E-01 | 4.323E-01 |
| C4orf48    | -0.127 | 6.235E-01 | 9.303E-01 |
| RIC8B      | -0.127 | 8.669E-02 | 1.570E-01 |
| CCDC116    | -0.127 | 5.749E-01 | 7.001E-01 |
| MIR3159    | -0.127 | NA        | 3.401E-01 |
| MIR3196    | -0.127 | NA        | 1.431E-01 |
| OR8D4      | -0.127 | NA        | 2.628E-01 |
| OR7G1      | -0.127 | NA        | 7.677E-02 |
| C6orf136   | -0.127 | 2.345E-01 | 2.721E-01 |
| ANKRD29    | -0.127 | 7.432E-01 | 1.761E-01 |
| AC113554.2 | -0.127 | NA        | 2.361E-01 |
| IFI6       | -0.127 | 7.213E-01 | 2.088E-01 |
| NUFIP1     | -0.128 | 1.385E-01 | 1.907E-01 |
| ATPAF2     | -0.128 | 1.751E-01 | 6.960E-01 |
| DUSP18     | -0.128 | 2.636E-01 | 7.689E-01 |
| SRSF1      | -0.128 | 1.306E-02 | 4.771E-01 |
| LILRB4     | -0.128 | 7.509E-01 | 5.319E-01 |
| SNAP29     | -0.128 | 2.162E-01 | 2.010E-01 |
| PWWP2A     | -0.128 | 7.678E-02 | 2.260E-01 |
| CCDC17     | -0.128 | 5.184E-01 | 5.956E-01 |
| RIPOR2     | -0.128 | 6.777E-01 | 2.970E-01 |
| RPP14      | -0.128 | 6.772E-02 | 5.634E-01 |
| OXLD1      | -0.128 | 3.061E-01 | 9.600E-01 |
| MIR4292    | -0.128 | 4.715E-01 | 1.930E-01 |
| PRKAA1     | -0.128 | 1.985E-01 | 4.036E-01 |
| IGSF9B     | -0.128 | 7.344E-01 | 3.866E-01 |
| CEL        | -0.128 | 7.713E-01 | 5.012E-01 |
| OR5K2      | -0.128 | 7.719E-01 | 2.445E-01 |
| CUX1       | -0.128 | 1.352E-01 | 1.142E-01 |
| RPL10      | -0.128 | 2.323E-01 | 3.581E-01 |
| TMCO2      | -0.128 | 7.963E-01 | 9.105E-01 |
| MIR181A2   | -0.128 | NA        | 6.919E-02 |
| MIR152     | -0.128 | NA        | 9.604E-01 |
| RSAD2      | -0.128 | 7.257E-01 | 9.606E-01 |
| GOT2       | -0.128 | 2.097E-01 | 8.166E-01 |
| BACH1      | -0.128 | 3.579E-01 | 6.156E-01 |
| PRSS57     | -0.128 | 8.534E-01 | 8.381E-01 |
| PARP14     | -0.128 | 4.067E-01 | 1.930E-01 |
| KCNV2      | -0.128 | 7.114E-01 | 1.586E-01 |
| CES2       | -0.128 | 2.849E-01 | 4.429E-01 |
| MOB1B      | -0.128 | 1.345E-01 | 6.481E-01 |
| OR52W1     | -0.129 | NA        | 3.581E-01 |
| MRPL40     | -0.129 | 2.422E-01 | 8.832E-01 |
| PANK3      | -0.129 | 2.612E-01 | 1.085E-01 |
| SLC15A5    | -0.129 | 8.693E-01 | 7.889E-01 |

|            |        |           |           |
|------------|--------|-----------|-----------|
| SPIRE1     | -0.129 | 5.749E-01 | 5.629E-01 |
| EXOSC8     | -0.129 | 1.319E-01 | 2.313E-01 |
| LARP1      | -0.129 | 9.109E-02 | 1.366E-01 |
| ACADSB     | -0.129 | 5.217E-01 | 2.012E-01 |
| MIR6772    | -0.129 | 7.415E-01 | 1.552E-01 |
| SLC25A3    | -0.129 | 7.458E-02 | 8.606E-01 |
| PHF23      | -0.129 | 9.114E-02 | 2.896E-01 |
| HOXB2      | -0.129 | 6.915E-01 | 6.076E-01 |
| DNAH1      | -0.129 | 4.868E-01 | 3.058E-01 |
| DCP2       | -0.129 | 1.278E-01 | 2.259E-01 |
| EP400NL    | -0.129 | 2.558E-01 | 6.411E-01 |
| CC2D1A     | -0.129 | 1.673E-01 | 4.622E-02 |
| PAM16      | -0.129 | 2.684E-01 | 4.850E-01 |
| FAM200B    | -0.129 | 2.154E-01 | 9.511E-02 |
| NHLRC4     | -0.129 | 5.689E-01 | 2.608E-01 |
| AC008764.1 | -0.129 | NA        | 2.295E-01 |
| OR4K2      | -0.129 | NA        | 2.430E-01 |
| GPHB5      | -0.129 | NA        | 2.110E-01 |
| METTL3     | -0.129 | 1.532E-01 | 1.061E-01 |
| POLR1C     | -0.129 | 1.686E-01 | 8.957E-01 |
| EAPP       | -0.129 | 7.456E-02 | 2.431E-01 |
| AMMECR1L   | -0.129 | 4.617E-02 | 9.839E-02 |
| RELT       | -0.129 | 3.735E-01 | 8.251E-01 |
| SYT10      | -0.129 | 8.541E-01 | 4.237E-01 |
| ITGAD      | -0.129 | 7.085E-01 | 1.336E-01 |
| GOLIM4     | -0.129 | 3.618E-01 | 2.794E-01 |
| GJA1       | -0.129 | 6.471E-01 | 3.670E-01 |
| STAT2      | -0.129 | 2.479E-01 | 6.009E-01 |
| COQ6       | -0.129 | 1.107E-01 | 4.580E-01 |
| KLF5       | -0.129 | 5.503E-01 | 6.790E-01 |
| PDXP       | -0.129 | 4.961E-01 | 5.576E-01 |
| SCN5A      | -0.129 | 7.754E-01 | 3.998E-01 |
| LARP4      | -0.129 | 8.590E-02 | 1.866E-01 |
| RECQL5     | -0.129 | 2.463E-01 | 3.974E-01 |
| TTC21B     | -0.129 | 1.394E-01 | 2.155E-01 |
| DHX37      | -0.129 | 6.427E-02 | 7.255E-01 |
| ADM2       | -0.129 | 6.751E-01 | 2.539E-01 |
| SACS       | -0.129 | 6.313E-01 | 6.501E-02 |
| RRN3       | -0.129 | 1.349E-01 | 1.506E-01 |
| PGGHG      | -0.130 | 6.470E-01 | 2.072E-01 |
| GRSF1      | -0.130 | 7.447E-02 | 1.315E-01 |
| EPSTI1     | -0.130 | 6.708E-01 | 2.010E-02 |
| KATNA1     | -0.130 | 8.521E-02 | 2.051E-01 |
| KLHDC8B    | -0.130 | 5.062E-01 | 9.181E-01 |
| ORC3       | -0.130 | 7.867E-02 | 8.219E-01 |
| SEZ6L2     | -0.130 | 6.544E-01 | 9.494E-01 |
| UBE2K      | -0.130 | 4.620E-02 | 1.078E-01 |
| DDR1       | -0.130 | 3.611E-01 | 7.408E-01 |
| SERPINB1   | -0.130 | 6.482E-01 | 1.124E-01 |
| UBXN8      | -0.130 | 3.138E-01 | 5.996E-01 |

|            |        |           |           |
|------------|--------|-----------|-----------|
| COX7B      | -0.130 | 1.954E-01 | 6.800E-01 |
| SPG7       | -0.130 | 1.724E-01 | 6.794E-01 |
| ANXA2R     | -0.130 | 5.211E-01 | 5.656E-01 |
| RAD9A      | -0.130 | 3.635E-01 | 8.150E-01 |
| STXBP5     | -0.130 | 2.715E-01 | 6.060E-01 |
| FLT3       | -0.130 | 7.215E-01 | 5.749E-01 |
| ZNF354A    | -0.130 | 2.252E-01 | 5.051E-01 |
| C5orf15    | -0.130 | 1.862E-01 | 6.713E-01 |
| PYM1       | -0.130 | 2.370E-01 | 8.845E-01 |
| KLHL36     | -0.130 | 2.086E-01 | 1.414E-01 |
| METAP2     | -0.130 | 9.320E-02 | 1.641E-01 |
| GNPTAB     | -0.130 | 1.908E-01 | 8.825E-01 |
| ODF1       | -0.130 | NA        | 2.925E-01 |
| RPS21      | -0.130 | 3.106E-01 | 4.348E-01 |
| CHCHD7     | -0.130 | 2.205E-01 | 3.511E-01 |
| AC243756.1 | -0.130 | 8.171E-01 | 1.056E-01 |
| KIAA0753   | -0.130 | 1.674E-01 | 1.712E-01 |
| MIR505     | -0.130 | NA        | 2.218E-01 |
| MIR3137    | -0.130 | NA        | 1.877E-01 |
| CRYGA      | -0.130 | NA        | 8.844E-02 |
| CDRT15L2   | -0.130 | NA        | 5.362E-01 |
| MIR410     | -0.130 | NA        | 1.802E-01 |
| OR8K5      | -0.130 | NA        | 4.945E-01 |
| PDSS1      | -0.130 | 2.398E-01 | 7.124E-01 |
| NUBP1      | -0.130 | 1.532E-01 | 1.318E-01 |
| TAP2       | -0.130 | 5.449E-01 | 6.089E-01 |
| FAM19A2    | -0.130 | 4.939E-01 | 6.429E-01 |
| KCNG4      | -0.130 | 8.369E-01 | 4.124E-01 |
| ALDOC      | -0.130 | 5.772E-01 | 4.873E-01 |
| OPN4       | -0.130 | 7.791E-01 | 7.171E-01 |
| TMEM237    | -0.130 | 2.917E-01 | 4.352E-01 |
| NCBP3      | -0.130 | 1.339E-01 | 5.045E-01 |
| 44166.000  | -0.131 | 8.167E-01 | 3.857E-01 |
| PAQR3      | -0.131 | 3.136E-01 | 9.990E-02 |
| DGKE       | -0.131 | 3.617E-01 | 5.531E-01 |
| SF3B5      | -0.131 | 2.004E-01 | 3.493E-01 |
| TRIM26     | -0.131 | 9.271E-02 | 2.158E-01 |
| MRPL41     | -0.131 | 4.244E-01 | 5.516E-02 |
| MIR4634    | -0.131 | NA        | 6.192E-01 |
| MIR6508    | -0.131 | NA        | 2.353E-01 |
| LCN12      | -0.131 | 6.837E-01 | 6.844E-02 |
| TRIM68     | -0.131 | 2.664E-01 | 1.981E-01 |
| ZCCHC3     | -0.131 | 1.218E-01 | 4.921E-01 |
| MIR6769A   | -0.131 | 8.082E-01 | 5.130E-01 |
| GAR1       | -0.131 | 9.561E-02 | 2.901E-01 |
| MTMR9      | -0.131 | 1.562E-01 | 6.160E-01 |
| CLEC16A    | -0.131 | 1.160E-01 | 7.448E-01 |
| HMG3       | -0.131 | 2.640E-01 | 2.778E-01 |
| ANGEL1     | -0.131 | 1.370E-01 | 6.859E-01 |
| RPL39      | -0.131 | 2.907E-01 | 3.318E-01 |

|            |        |           |           |
|------------|--------|-----------|-----------|
| TXNIP      | -0.131 | 5.136E-01 | 3.464E-01 |
| PIGA       | -0.131 | 3.162E-01 | 2.330E-01 |
| CCNA1      | -0.131 | 8.425E-01 | 3.043E-01 |
| PLA2G2A    | -0.131 | 8.156E-01 | 7.965E-01 |
| LRRC39     | -0.131 | 4.931E-01 | 6.406E-01 |
| NME3       | -0.131 | 4.840E-01 | 3.131E-01 |
| KLRF1      | -0.131 | 7.291E-01 | 2.336E-01 |
| RNF4       | -0.131 | 8.665E-02 | 3.825E-01 |
| HLA-B      | -0.131 | 6.200E-01 | 6.945E-01 |
| CD164      | -0.131 | 1.489E-01 | 7.088E-01 |
| TMEM191B   | -0.131 | 7.558E-01 | 5.597E-01 |
| SRSF8      | -0.131 | 1.418E-01 | 1.522E-01 |
| DNAH10OS   | -0.132 | 6.410E-01 | 9.458E-01 |
| C1orf52    | -0.132 | 4.924E-02 | 3.686E-01 |
| METTL15    | -0.132 | 9.883E-02 | 1.495E-01 |
| NUP62CL    | -0.132 | 5.957E-01 | 1.821E-01 |
| SLC43A2    | -0.132 | 4.397E-01 | 4.757E-01 |
| SAFB       | -0.132 | 1.054E-02 | 6.856E-01 |
| KLB        | -0.132 | 5.394E-01 | 4.694E-01 |
| CCDC157    | -0.132 | 3.509E-01 | 7.025E-01 |
| TMCC2      | -0.132 | 6.030E-01 | 7.163E-01 |
| AC005702.2 | -0.132 | 8.534E-01 | 4.714E-01 |
| ACCSL      | -0.132 | 8.857E-01 | 5.187E-01 |
| FEM1C      | -0.132 | 1.369E-01 | 1.287E-01 |
| MRPS28     | -0.132 | 1.585E-01 | 5.958E-01 |
| ASNS       | -0.132 | 4.552E-01 | 2.417E-01 |
| MIR5003    | -0.132 | NA        | 1.730E-01 |
| TXN2       | -0.132 | 1.798E-01 | 2.940E-01 |
| MUC4       | -0.132 | 8.136E-01 | 9.254E-01 |
| C20orf196  | -0.132 | 1.954E-01 | 6.239E-01 |
| SNX15      | -0.132 | 3.240E-01 | 4.278E-01 |
| SLCO2B1    | -0.132 | 6.871E-01 | 1.778E-01 |
| LACTB      | -0.132 | 1.342E-01 | 6.068E-01 |
| MT2A       | -0.132 | 7.410E-01 | 2.451E-01 |
| TMEM92     | -0.132 | 6.807E-01 | 8.975E-02 |
| TANK       | -0.132 | 8.842E-02 | 1.340E-01 |
| L3MBTL3    | -0.132 | 3.080E-01 | 5.181E-01 |
| FCRL1      | -0.132 | 8.369E-01 | 3.693E-01 |
| METTL1     | -0.132 | 1.984E-01 | 3.683E-01 |
| ZNF653     | -0.132 | 1.767E-01 | 7.546E-01 |
| SRPK3      | -0.132 | 5.710E-01 | 3.425E-01 |
| ZC3H8      | -0.132 | 1.786E-01 | 1.185E-01 |
| PHIP       | -0.132 | 1.996E-01 | 7.728E-01 |
| STX18      | -0.132 | 3.245E-02 | 1.045E-01 |
| FUT7       | -0.132 | 7.271E-01 | 6.996E-01 |
| KCTD15     | -0.132 | 6.103E-01 | 4.280E-02 |
| ZNF91      | -0.133 | 5.013E-01 | 2.361E-01 |
| CEP162     | -0.133 | 1.789E-01 | 1.222E-01 |
| DEFB108B   | -0.133 | NA        | 1.459E-01 |
| UTP20      | -0.133 | 1.752E-01 | 3.518E-01 |

|             |        |           |           |
|-------------|--------|-----------|-----------|
| OR2C1       | -0.133 | 7.845E-01 | 9.497E-01 |
| MTX3        | -0.133 | 1.592E-01 | 2.835E-01 |
| CCDC88C     | -0.133 | 3.483E-01 | 1.502E-01 |
| LILRB1      | -0.133 | 6.926E-01 | 3.668E-01 |
| PARM1       | -0.133 | 6.611E-01 | 2.119E-01 |
| SRCIN1      | -0.133 | 6.921E-01 | 6.518E-01 |
| FAM71E1     | -0.133 | 5.673E-01 | 2.014E-01 |
| DMC1        | -0.133 | 7.046E-01 | 3.678E-01 |
| BCO2        | -0.133 | 6.352E-01 | 1.325E-01 |
| NECAB2      | -0.133 | 7.448E-01 | 3.906E-01 |
| DARS        | -0.133 | 9.171E-02 | 7.742E-01 |
| OR7C2       | -0.133 | NA        | 1.262E-01 |
| MIR543      | -0.133 | NA        | 2.947E-01 |
| MIR3664     | -0.133 | NA        | 9.771E-01 |
| ZMYND8      | -0.133 | 3.409E-01 | 4.804E-01 |
| PARP9       | -0.133 | 4.698E-01 | 1.526E-01 |
| ILF3        | -0.133 | 6.924E-02 | 5.292E-01 |
| CFP         | -0.133 | 6.521E-01 | 1.825E-01 |
| METTL12     | -0.133 | 3.228E-01 | 8.331E-01 |
| NARS2       | -0.133 | 1.984E-01 | 2.594E-01 |
| NEK3        | -0.133 | 3.211E-01 | 5.168E-01 |
| PPP1R17     | -0.133 | 8.791E-01 | 7.132E-01 |
| MIR3133     | -0.133 | NA        | 3.948E-01 |
| E2F3        | -0.133 | 4.976E-01 | 4.198E-01 |
| ZBED3       | -0.133 | 4.721E-01 | 5.967E-01 |
| KIAA0930    | -0.133 | 1.602E-01 | 3.664E-01 |
| CHAC2       | -0.133 | 4.159E-01 | 7.732E-01 |
| TSKU        | -0.134 | 4.847E-01 | 2.521E-01 |
| ATAD5       | -0.134 | 3.483E-01 | 6.229E-01 |
| CXorf49B    | -0.134 | 9.001E-01 | 1.198E-01 |
| PCOLCE2     | -0.134 | 7.489E-01 | 2.768E-01 |
| LARS2       | -0.134 | 1.233E-01 | 2.770E-01 |
| DMTF1       | -0.134 | 1.738E-01 | 1.428E-01 |
| OVOL1       | -0.134 | 6.484E-01 | 7.029E-01 |
| ZNF430      | -0.134 | 2.872E-01 | 7.242E-01 |
| MTERF4      | -0.134 | 6.198E-02 | 1.301E-01 |
| N4BP2L2     | -0.134 | 1.483E-01 | 5.468E-01 |
| IL17A       | -0.134 | 8.760E-01 | 1.829E-01 |
| SNRPA       | -0.134 | 1.310E-01 | 3.993E-01 |
| PPIH        | -0.134 | 2.444E-01 | 4.193E-01 |
| DHX15       | -0.134 | 4.979E-02 | 6.405E-01 |
| IBA57       | -0.134 | 2.922E-01 | 3.609E-01 |
| MAU2        | -0.134 | 1.052E-01 | 2.539E-01 |
| PCDHGC3     | -0.134 | 6.043E-01 | 8.365E-01 |
| TNJB2BP-COX | -0.134 | 3.161E-01 | 1.202E-01 |
| GTSE1       | -0.134 | 3.906E-01 | 9.635E-02 |
| LLPH        | -0.134 | 2.346E-01 | 1.114E-01 |
| TMEM256     | -0.134 | 3.233E-01 | 1.394E-01 |
| MIR328      | -0.134 | NA        | 7.334E-01 |
| MIR4504     | -0.134 | NA        | 1.281E-01 |

|            |        |           |           |
|------------|--------|-----------|-----------|
| GPR78      | -0.134 | 7.840E-01 | 7.627E-01 |
| CTAG1B     | -0.134 | NA        | 2.375E-01 |
| PYCARD     | -0.134 | 4.914E-01 | 5.859E-01 |
| ACSF3      | -0.134 | 1.717E-01 | 3.962E-01 |
| OR1E1      | -0.135 | NA        | 2.738E-01 |
| REC8       | -0.135 | 5.011E-01 | 2.648E-01 |
| HOMER1     | -0.135 | 3.714E-01 | 3.699E-01 |
| U2SURP     | -0.135 | 9.398E-02 | 5.328E-01 |
| EM110-MUS  | -0.135 | 4.269E-01 | 3.671E-01 |
| NSMAF      | -0.135 | 8.209E-02 | 5.492E-02 |
| GTF2H5     | -0.135 | 1.222E-01 | 9.240E-02 |
| WDR90      | -0.135 | 3.345E-01 | 2.280E-01 |
| SATB2      | -0.135 | 5.696E-01 | 4.491E-02 |
| AKAP17A    | -0.135 | 3.025E-01 | 1.829E-01 |
| ZMYM6      | -0.135 | 3.567E-02 | 4.027E-01 |
| MIR6753    | -0.135 | 5.853E-01 | 1.769E-01 |
| CORO7      | -0.135 | 3.321E-01 | 1.059E-01 |
| CNOT6L     | -0.135 | 1.378E-01 | 6.461E-01 |
| MITD1      | -0.135 | 1.178E-01 | 7.120E-01 |
| IRF7       | -0.135 | 5.635E-01 | 6.168E-01 |
| S100A14    | -0.135 | 7.295E-01 | 2.324E-01 |
| OR52B2     | -0.135 | NA        | 8.371E-01 |
| AL139392.1 | -0.135 | 7.441E-01 | 1.190E-01 |
| MTRNR2L13  | -0.135 | 8.427E-01 | 1.034E-01 |
| SH2D6      | -0.135 | 6.096E-01 | 6.884E-01 |
| ZNF26      | -0.135 | 2.540E-01 | 6.280E-01 |
| MT-ND4L    | -0.135 | 6.245E-01 | 4.335E-01 |
| TRIM14     | -0.135 | 3.387E-01 | 3.305E-01 |
| RSAD1      | -0.135 | 1.920E-01 | 3.751E-01 |
| ZNF335     | -0.135 | 7.856E-02 | 6.400E-01 |
| PRKCD      | -0.135 | 3.403E-01 | 2.084E-01 |
| C14orf2    | -0.135 | 2.229E-01 | 5.045E-01 |
| NARF       | -0.135 | 2.635E-01 | 1.766E-01 |
| MIR454     | -0.135 | NA        | 3.702E-01 |
| AL353588.1 | -0.135 | 5.489E-01 | 1.002E-01 |
| ARHGAP11A  | -0.135 | 3.676E-01 | 3.327E-01 |
| BTBD3      | -0.136 | 3.984E-01 | 1.799E-01 |
| C14orf177  | -0.136 | NA        | 1.156E-01 |
| ZNF783     | -0.136 | 2.043E-01 | 2.235E-01 |
| HDAC1      | -0.136 | 5.952E-02 | 6.734E-01 |
| NTPCR      | -0.136 | 1.112E-01 | 1.421E-01 |
| COX5B      | -0.136 | 3.043E-01 | 2.313E-01 |
| SAPCD1     | -0.136 | 5.731E-01 | 5.628E-02 |
| GAREM2     | -0.136 | 5.025E-01 | 7.472E-02 |
| SCARF1     | -0.136 | 3.954E-01 | 1.008E-01 |
| HMHB1      | -0.136 | 8.174E-01 | 5.751E-01 |
| SRSF2      | -0.136 | 1.066E-02 | 2.621E-01 |
| PAPD4      | -0.136 | 5.524E-02 | 2.677E-01 |
| PLD5       | -0.136 | 8.540E-01 | 3.076E-01 |
| EXOG       | -0.136 | 2.696E-01 | 1.484E-01 |

|            |        |           |           |
|------------|--------|-----------|-----------|
| PET100     | -0.136 | 3.796E-01 | 9.094E-02 |
| SETD1B     | -0.136 | 7.009E-02 | 2.769E-01 |
| OR7G2      | -0.136 | NA        | 5.824E-01 |
| SPATA31A7  | -0.136 | NA        | 5.548E-01 |
| MIR640     | -0.136 | NA        | 6.676E-01 |
| ZNF396     | -0.136 | 3.522E-01 | 6.572E-01 |
| OPLAH      | -0.136 | 5.361E-01 | 1.286E-01 |
| RBM38      | -0.136 | 3.162E-01 | 7.802E-01 |
| MCRS1      | -0.136 | 3.580E-02 | 8.466E-01 |
| PHKA2      | -0.136 | 2.987E-01 | 2.154E-01 |
| DNPEP      | -0.136 | 1.009E-01 | 9.340E-02 |
| HIST1H3B   | -0.136 | 7.227E-01 | 2.201E-01 |
| PPA1       | -0.136 | 1.679E-01 | 5.217E-01 |
| MAN2A1     | -0.136 | 1.911E-01 | 3.177E-01 |
| SLCO1B7    | -0.136 | 8.999E-01 | 5.176E-01 |
| PPP1R14C   | -0.136 | 7.685E-01 | 1.615E-01 |
| COL4A5     | -0.136 | 5.981E-01 | 7.685E-01 |
| SLC35F2    | -0.136 | 4.378E-01 | 4.257E-01 |
| ARHGEF19   | -0.136 | 4.593E-01 | 6.535E-01 |
| EXOC1      | -0.137 | 5.345E-02 | 7.534E-01 |
| TSTD3      | -0.137 | 2.565E-01 | 1.261E-01 |
| ZBTB43     | -0.137 | 1.738E-01 | 6.591E-01 |
| FAM69A     | -0.137 | 4.176E-01 | 1.933E-01 |
| PSMA5      | -0.137 | 9.314E-02 | 2.604E-01 |
| DDX5       | -0.137 | 4.427E-02 | 4.737E-01 |
| PIK3IP1    | -0.137 | 4.705E-01 | 9.113E-01 |
| MRPS2      | -0.137 | 2.109E-01 | 3.016E-01 |
| MIR4477B   | -0.137 | 5.613E-01 | 5.109E-01 |
| SMAD5      | -0.137 | 1.389E-01 | 1.429E-01 |
| RCHY1      | -0.137 | 5.929E-02 | 6.555E-01 |
| TMEM86B    | -0.137 | 4.471E-01 | 7.177E-01 |
| FBF1       | -0.137 | 4.067E-01 | 9.815E-02 |
| AC036214.3 | -0.137 | 4.705E-01 | 8.340E-01 |
| TCF3       | -0.137 | 1.346E-01 | 4.801E-01 |
| RAB24      | -0.137 | 2.172E-01 | 9.194E-01 |
| TRO        | -0.137 | 6.579E-01 | 2.766E-01 |
| FLRT1      | -0.137 | 5.905E-01 | 5.440E-01 |
| PARP10     | -0.137 | 3.213E-01 | 6.225E-01 |
| TMEM134    | -0.137 | 3.185E-01 | 5.003E-02 |
| MIR1268B   | -0.137 | NA        | 5.534E-01 |
| MIR664A    | -0.137 | NA        | 9.379E-01 |
| RBM26      | -0.137 | 6.508E-02 | 2.151E-01 |
| ZNF76      | -0.137 | 1.571E-01 | 2.560E-01 |
| MIR508     | -0.137 | NA        | 7.213E-01 |
| POTEB3     | -0.137 | NA        | 6.228E-02 |
| MIR3677    | -0.137 | 6.866E-01 | 8.507E-02 |
| LIPT1      | -0.137 | 1.191E-01 | 1.212E-01 |
| C22orf42   | -0.137 | 8.635E-01 | 4.959E-01 |
| ACIN1      | -0.137 | 5.067E-02 | 3.885E-01 |
| GSPT1      | -0.137 | 1.260E-01 | 1.299E-01 |

|            |        |           |           |
|------------|--------|-----------|-----------|
| NUP35      | -0.137 | 8.865E-02 | 1.134E-01 |
| LAMA5      | -0.137 | 4.137E-01 | 2.190E-01 |
| FAM110C    | -0.137 | 6.224E-01 | 8.764E-01 |
| DLG2       | -0.137 | 5.864E-01 | 8.739E-01 |
| BAHD1      | -0.137 | 1.124E-01 | 5.691E-01 |
| C2         | -0.138 | 6.683E-01 | 1.257E-01 |
| CRISPLD1   | -0.138 | 6.621E-01 | 1.156E-01 |
| CNOT6      | -0.138 | 7.477E-02 | 4.299E-01 |
| RBM22      | -0.138 | 1.128E-02 | 4.134E-02 |
| METTTL21A  | -0.138 | 1.469E-01 | 6.465E-01 |
| SLC35E2B   | -0.138 | 3.654E-01 | 1.909E-01 |
| MRPS35     | -0.138 | 1.013E-01 | 1.259E-01 |
| GBP6       | -0.138 | 7.944E-01 | 1.859E-01 |
| TAMM41     | -0.138 | 1.891E-01 | 3.983E-02 |
| PIK3R5     | -0.138 | 6.063E-01 | 1.816E-01 |
| ADAP1      | -0.138 | 5.701E-01 | 2.596E-01 |
| DECR1      | -0.138 | 2.872E-01 | 4.364E-01 |
| FUCA1      | -0.138 | 4.280E-01 | 9.632E-01 |
| ZNF516     | -0.138 | 4.840E-01 | 2.258E-01 |
| GTF3C3     | -0.138 | 4.561E-02 | 2.658E-01 |
| CNTN4      | -0.138 | 6.602E-01 | 2.485E-01 |
| TMA7       | -0.138 | 2.551E-01 | 3.524E-01 |
| SLC2A13    | -0.138 | 4.840E-01 | 1.093E-01 |
| CPOX       | -0.138 | 1.687E-01 | 4.835E-01 |
| CTSG       | -0.138 | 7.847E-01 | 1.187E-01 |
| MIR1285-1  | -0.138 | 6.842E-01 | 3.513E-01 |
| MTMR8      | -0.138 | 5.246E-01 | 9.732E-02 |
| NPC2       | -0.138 | 3.392E-01 | 4.499E-01 |
| TADA2B     | -0.139 | 3.276E-02 | 5.949E-01 |
| AC008575.2 | -0.139 | 5.189E-01 | 8.929E-02 |
| UBL4B      | -0.139 | 7.402E-01 | 8.729E-01 |
| GSG1       | -0.139 | 7.125E-01 | 2.027E-01 |
| MTHFR      | -0.139 | 1.738E-01 | 1.201E-01 |
| PASK       | -0.139 | 2.545E-01 | 4.429E-01 |
| C19orf60   | -0.139 | 3.714E-01 | 8.158E-02 |
| CHCHD5     | -0.139 | 2.718E-01 | 6.440E-01 |
| SPAG11B    | -0.139 | NA        | 6.776E-01 |
| PRR21      | -0.139 | NA        | 1.895E-01 |
| CYLC2      | -0.139 | NA        | 9.582E-01 |
| AGO2       | -0.139 | 2.153E-01 | 9.605E-01 |
| ZCCHC4     | -0.139 | 4.865E-02 | 9.633E-01 |
| HLA-DQA1   | -0.139 | 7.084E-01 | 4.475E-01 |
| FAM60A     | -0.139 | 2.673E-01 | 3.591E-01 |
| ZNF615     | -0.139 | 4.838E-01 | 3.860E-01 |
| ATG2A      | -0.139 | 3.888E-02 | 3.418E-01 |
| THOC6      | -0.139 | 1.766E-01 | 2.938E-01 |
| ACP6       | -0.139 | 5.114E-01 | 5.478E-01 |
| GCSH       | -0.139 | 2.430E-01 | 4.373E-01 |
| MIR7845    | -0.139 | 8.921E-01 | 1.308E-01 |
| HDDC2      | -0.139 | 1.526E-01 | 8.070E-01 |



|            |        |           |           |
|------------|--------|-----------|-----------|
| CALML4     | -0.139 | 3.515E-01 | 1.127E-01 |
| IL5        | -0.139 | 7.452E-01 | 8.818E-02 |
| CRIPAK     | -0.139 | 3.101E-01 | 8.227E-02 |
| BTN3A3     | -0.139 | 4.646E-01 | 4.701E-01 |
| DENND6B    | -0.139 | 3.299E-01 | 8.400E-02 |
| DIP2B      | -0.139 | 2.614E-01 | 6.427E-01 |
| ARHGEF10L  | -0.139 | 4.053E-01 | 3.507E-01 |
| CDX4       | -0.139 | NA        | 5.490E-01 |
| RPS25      | -0.139 | 1.971E-01 | 3.429E-01 |
| RPS12      | -0.139 | 2.730E-01 | 7.840E-02 |
| PABPN1     | -0.139 | 1.205E-01 | 8.875E-01 |
| DIP2A      | -0.140 | 1.510E-01 | 1.761E-01 |
| CEP135     | -0.140 | 1.910E-01 | 5.874E-01 |
| LDHA       | -0.140 | 4.330E-01 | 5.018E-01 |
| GTPBP1     | -0.140 | 5.477E-02 | 1.720E-01 |
| ZRANB2     | -0.140 | 3.674E-02 | 6.032E-01 |
| ZNF20      | -0.140 | 3.175E-01 | 6.043E-01 |
| NR6A1      | -0.140 | 3.603E-01 | 1.385E-01 |
| ZSCAN9     | -0.140 | 2.640E-01 | 4.942E-02 |
| NDUFA12    | -0.140 | 6.846E-02 | 1.821E-01 |
| TRABD2B    | -0.140 | 7.062E-01 | 8.976E-01 |
| PRDM4      | -0.140 | 2.321E-02 | 8.976E-01 |
| LIME1      | -0.140 | 4.107E-01 | 5.781E-01 |
| OR2A4      | -0.140 | NA        | 8.406E-01 |
| CAPS2      | -0.140 | 4.622E-01 | 6.201E-01 |
| FSD1       | -0.140 | 7.528E-01 | 5.270E-01 |
| BTBD10     | -0.140 | 8.382E-02 | 1.262E-01 |
| AL513165.2 | -0.140 | 7.026E-01 | 6.654E-01 |
| OR4F5      | -0.140 | NA        | 1.448E-01 |
| OR10K2     | -0.140 | NA        | 1.871E-01 |
| MBD3L2B    | -0.140 | NA        | 5.412E-02 |
| KRTAP19-4  | -0.140 | NA        | 2.548E-01 |
| GOLGA8H    | -0.140 | 5.163E-01 | 6.619E-01 |
| PPP1R27    | -0.140 | 6.839E-01 | 3.309E-01 |
| REXO1      | -0.140 | 5.920E-02 | 4.076E-01 |
| AC113404.3 | -0.140 | 5.436E-01 | 8.443E-02 |
| KMT2D      | -0.140 | 1.880E-01 | 3.383E-01 |
| AHI1       | -0.140 | 1.980E-01 | 2.306E-01 |
| AC067968.1 | -0.140 | 8.184E-01 | 1.903E-01 |
| NAA60      | -0.140 | 1.110E-01 | 7.632E-01 |
| ADAMTS13   | -0.140 | 5.070E-01 | 2.683E-01 |
| MTTP       | -0.140 | 7.224E-01 | 3.188E-02 |
| MIR6738    | -0.140 | NA        | 3.728E-01 |
| ELMSAN1    | -0.141 | 1.532E-01 | 4.220E-01 |
| KLRG1      | -0.141 | 5.507E-01 | 5.886E-01 |
| CCNL1      | -0.141 | 2.027E-01 | 5.775E-01 |
| GRK4       | -0.141 | 1.736E-01 | 1.654E-01 |
| MRPS15     | -0.141 | 1.334E-01 | 6.424E-02 |
| BCLAF1     | -0.141 | 1.357E-02 | 8.786E-01 |
| PRPF38B    | -0.141 | 5.474E-02 | 7.506E-01 |

|            |        |           |           |
|------------|--------|-----------|-----------|
| ZNF101     | -0.141 | 8.327E-02 | 9.264E-01 |
| SIAH1      | -0.141 | 1.401E-01 | 9.291E-01 |
| HOXA13     | -0.141 | 6.616E-01 | 1.304E-01 |
| LRRC8D     | -0.141 | 2.193E-01 | 5.958E-01 |
| PYDC1      | -0.141 | 8.425E-01 | 4.545E-01 |
| COX10      | -0.141 | 7.285E-02 | 8.399E-02 |
| MIR4737    | -0.141 | 5.606E-01 | 7.619E-02 |
| NMD3       | -0.141 | 1.246E-01 | 4.111E-01 |
| CCDC96     | -0.141 | 2.970E-01 | 8.175E-01 |
| LARP7      | -0.141 | 1.057E-02 | 2.102E-01 |
| CEP152     | -0.141 | 2.206E-01 | 6.267E-02 |
| SPAAR      | -0.141 | 4.617E-01 | 4.476E-01 |
| EIF4A2     | -0.141 | 1.435E-01 | 6.712E-02 |
| ARMC5      | -0.141 | 2.115E-01 | 1.484E-01 |
| ABI3       | -0.141 | 5.405E-01 | 1.507E-01 |
| ILKAP      | -0.141 | 9.529E-02 | 5.692E-01 |
| ARIH2      | -0.141 | 5.740E-02 | 3.422E-01 |
| CRYBB2     | -0.141 | 7.086E-01 | 3.412E-02 |
| SLC25A30   | -0.141 | 1.906E-01 | 4.392E-02 |
| IKZF4      | -0.141 | 1.713E-01 | 1.304E-01 |
| MANEA      | -0.141 | 2.358E-01 | 1.978E-01 |
| AL139300.1 | -0.141 | NA        | 4.739E-01 |
| SPATA6L    | -0.141 | 4.607E-01 | 5.271E-01 |
| ZNF711     | -0.141 | 5.996E-01 | 5.940E-01 |
| CDX2       | -0.142 | 8.391E-01 | 2.447E-01 |
| FBXO6      | -0.142 | 3.094E-01 | 1.157E-01 |
| SMR3A      | -0.142 | NA        | 1.037E-01 |
| MAEA       | -0.142 | 4.479E-02 | 3.490E-01 |
| MLLT6      | -0.142 | 1.984E-01 | 1.904E-01 |
| TFEC       | -0.142 | 6.829E-01 | 2.261E-01 |
| FBXL8      | -0.142 | 2.931E-01 | 7.699E-01 |
| SSBP4      | -0.142 | 2.098E-01 | 1.365E-01 |
| CLEC7A     | -0.142 | 6.571E-01 | 1.358E-01 |
| HSD17B14   | -0.142 | 6.089E-01 | 2.364E-01 |
| DOCK6      | -0.142 | 1.835E-01 | 1.804E-01 |
| RPLP1      | -0.142 | 2.931E-01 | 3.711E-02 |
| ANO5       | -0.142 | 7.257E-01 | 7.890E-02 |
| TNFRSF17   | -0.142 | 7.808E-01 | 3.447E-01 |
| BTN2A2     | -0.142 | 3.379E-01 | 7.858E-02 |
| LINC00854  | -0.142 | 5.204E-01 | 5.237E-01 |
| RNF175     | -0.142 | 6.035E-01 | 5.880E-01 |
| SLC18A1    | -0.142 | 8.007E-01 | 5.239E-01 |
| DRAM1      | -0.142 | 4.938E-01 | 5.789E-01 |
| FBXO5      | -0.142 | 3.339E-01 | 1.025E-01 |
| GEMIN5     | -0.142 | 8.576E-02 | 2.204E-01 |
| ZNF740     | -0.142 | 7.551E-02 | 4.193E-01 |
| MRPL50     | -0.142 | 1.020E-01 | 2.720E-01 |
| MIR3131    | -0.142 | 9.273E-01 | 1.586E-01 |
| PTPRB      | -0.142 | 4.401E-01 | 1.678E-01 |
| GRK6       | -0.142 | 8.595E-02 | 7.295E-01 |

|           |        |           |           |
|-----------|--------|-----------|-----------|
| EIF3D     | -0.142 | 8.457E-02 | 8.246E-02 |
| PABPC4L   | -0.142 | 6.314E-01 | 7.201E-01 |
| SERF1A    | -0.142 | 7.214E-01 | 1.038E-01 |
| TRPM2     | -0.142 | 5.795E-01 | 4.506E-02 |
| CRYZ      | -0.143 | 4.715E-01 | 8.035E-02 |
| DCAF5     | -0.143 | 4.108E-02 | 3.871E-01 |
| TAAR5     | -0.143 | NA        | 5.658E-01 |
| IFNA8     | -0.143 | NA        | 3.573E-01 |
| ANKRD20A3 | -0.143 | NA        | 5.048E-01 |
| RNASE3    | -0.143 | 7.572E-01 | 6.873E-01 |
| LCE1D     | -0.143 | 9.296E-01 | 2.070E-01 |
| TRANK1    | -0.143 | 3.317E-01 | 5.964E-01 |
| CPNE5     | -0.143 | 5.208E-01 | 7.044E-01 |
| C6orf201  | -0.143 | 5.465E-01 | 1.691E-01 |
| TP53I3    | -0.143 | 3.524E-01 | 2.288E-01 |
| MIR933    | -0.143 | NA        | 3.485E-01 |
| DLX5      | -0.143 | 6.884E-01 | 6.681E-01 |
| MIR3661   | -0.143 | NA        | 3.017E-01 |
| MIR521-2  | -0.143 | NA        | 6.430E-01 |
| SLC7A10   | -0.143 | 7.962E-01 | 2.611E-01 |
| PELI2     | -0.143 | 5.942E-01 | 7.543E-01 |
| ABTB1     | -0.143 | 2.987E-01 | 1.944E-01 |
| TBP       | -0.143 | 2.446E-02 | 4.300E-01 |
| ZNF74     | -0.143 | 2.711E-01 | 1.282E-01 |
| SLC15A3   | -0.143 | 5.905E-01 | 1.773E-01 |
| CAMKK2    | -0.143 | 7.007E-02 | 7.389E-01 |
| PRAM1     | -0.143 | 5.578E-01 | 1.598E-01 |
| MIR4512   | -0.143 | 7.294E-01 | 6.230E-01 |
| SPATA2L   | -0.143 | 2.596E-01 | 3.825E-01 |
| ISCU      | -0.143 | 5.764E-02 | 1.134E-01 |
| TEPSIN    | -0.143 | 1.665E-01 | 8.635E-01 |
| MIR4783   | -0.143 | NA        | 7.728E-01 |
| PRKG2     | -0.143 | 5.613E-01 | 8.037E-02 |
| FAM218A   | -0.143 | 7.124E-01 | 1.824E-01 |
| IGBP1     | -0.144 | 7.483E-02 | 6.395E-01 |
| HDAC2     | -0.144 | 9.760E-02 | 9.328E-01 |
| AMPD3     | -0.144 | 3.217E-01 | 9.411E-01 |
| SAT2      | -0.144 | 2.708E-01 | 9.441E-01 |
| SP140L    | -0.144 | 2.980E-01 | 8.601E-02 |
| NR4A3     | -0.144 | 6.893E-01 | 2.453E-01 |
| SAGE1     | -0.144 | 9.080E-01 | 9.745E-01 |
| MCM9      | -0.144 | 8.468E-02 | 4.948E-01 |
| FAM174A   | -0.144 | 1.500E-01 | 3.156E-01 |
| GNRH1     | -0.144 | 3.460E-01 | 4.439E-01 |
| CD58      | -0.144 | 2.392E-01 | 9.032E-01 |
| ART3      | -0.144 | 7.317E-01 | 6.410E-01 |
| BRAP      | -0.144 | 3.540E-02 | 4.062E-01 |
| EN1       | -0.144 | 8.298E-01 | 1.995E-01 |
| C12orf29  | -0.144 | 8.982E-02 | 7.309E-02 |
| DUSP9     | -0.144 | 7.351E-01 | 2.731E-01 |

|            |        |           |           |
|------------|--------|-----------|-----------|
| BMP10      | -0.144 | NA        | 5.758E-01 |
| HDAC9      | -0.144 | 6.730E-01 | 2.032E-01 |
| AC090004.1 | -0.144 | 4.579E-01 | 4.357E-01 |
| NTN3       | -0.144 | 6.985E-01 | 2.661E-01 |
| TBX10      | -0.144 | 8.124E-01 | 1.011E-01 |
| TBC1D3B    | -0.144 | 6.301E-01 | 1.383E-01 |
| MAP3K19    | -0.144 | 6.169E-01 | 4.507E-02 |
| TLR2       | -0.144 | 5.877E-01 | 3.891E-01 |
| ZNF700     | -0.144 | 2.855E-01 | 5.403E-01 |
| RGS14      | -0.144 | 2.963E-01 | 4.735E-01 |
| PLEKHH2    | -0.144 | 5.667E-01 | 3.033E-01 |
| GNAL       | -0.144 | 5.753E-01 | 1.404E-01 |
| ARMT1      | -0.144 | 6.582E-02 | 1.883E-01 |
| PANO1      | -0.144 | 3.958E-01 | 5.202E-01 |
| MIR5092    | -0.144 | NA        | 7.175E-01 |
| ITM2B      | -0.144 | 3.093E-01 | 6.113E-01 |
| IQCF2      | -0.144 | NA        | 3.526E-01 |
| SOX8       | -0.144 | 6.333E-01 | 5.524E-02 |
| PES1       | -0.145 | 1.669E-01 | 1.097E-01 |
| PCGF2      | -0.145 | 2.735E-01 | 4.220E-01 |
| THOC5      | -0.145 | 1.627E-01 | 6.489E-01 |
| ABR        | -0.145 | 2.153E-01 | 8.516E-02 |
| PRH1       | -0.145 | 4.566E-01 | 3.319E-01 |
| CD83       | -0.145 | 4.709E-01 | 1.892E-01 |
| LPCAT4     | -0.145 | 3.923E-01 | 6.021E-02 |
| PRMT1      | -0.145 | 8.643E-02 | 2.353E-01 |
| DNTT       | -0.145 | 8.934E-01 | 9.340E-02 |
| KRT83      | -0.145 | 7.806E-01 | 8.811E-02 |
| BEND5      | -0.145 | 6.329E-01 | 1.782E-01 |
| DYRK3      | -0.145 | 4.142E-01 | 4.296E-01 |
| OMG        | -0.145 | 4.652E-01 | 7.271E-02 |
| LDB1       | -0.145 | 1.460E-01 | 4.219E-01 |
| UNC93B1    | -0.145 | 3.598E-01 | 2.332E-01 |
| PISD       | -0.145 | 1.132E-01 | 3.311E-01 |
| NOTCH1     | -0.145 | 4.199E-01 | 5.269E-01 |
| SLC35G5    | -0.145 | 6.190E-01 | 1.142E-01 |
| RNF31      | -0.145 | 9.202E-02 | 2.258E-01 |
| HOXA3      | -0.145 | 4.289E-01 | 4.120E-01 |
| SPATA1     | -0.145 | 3.056E-01 | 3.262E-01 |
| CIRBP      | -0.145 | 2.482E-01 | 5.507E-01 |
| TNFRSF13C  | -0.145 | 6.036E-01 | 3.674E-01 |
| EED        | -0.145 | 5.001E-02 | 4.912E-02 |
| CEP131     | -0.145 | 2.913E-01 | 5.165E-02 |
| SLC25A16   | -0.146 | 1.258E-01 | 3.905E-01 |
| MGMT       | -0.146 | 4.253E-01 | 4.568E-01 |
| PDYN       | -0.146 | NA        | 4.031E-01 |
| AC025263.2 | -0.146 | NA        | 3.831E-01 |
| KRTAP4-5   | -0.146 | NA        | 7.623E-01 |
| ZNF169     | -0.146 | 1.937E-01 | 4.664E-01 |
| TTYH3      | -0.146 | 2.019E-01 | 1.898E-01 |

|            |        |           |           |
|------------|--------|-----------|-----------|
| CNOT2      | -0.146 | 1.404E-01 | 4.101E-01 |
| NME1-NME2  | -0.146 | 4.528E-01 | 1.026E-01 |
| FIG4       | -0.146 | 1.531E-01 | 2.269E-01 |
| TRIM13     | -0.146 | 2.512E-01 | 1.362E-01 |
| TLDC2      | -0.146 | 5.605E-01 | 2.453E-02 |
| PLA2G4F    | -0.146 | 6.664E-01 | 4.550E-01 |
| ZNF552     | -0.146 | 4.868E-01 | 7.879E-01 |
| PSMB9      | -0.146 | 6.560E-01 | 3.271E-01 |
| LAMB3      | -0.146 | 6.620E-01 | 6.604E-01 |
| IMPDH2     | -0.146 | 1.909E-01 | 1.266E-01 |
| RNF138     | -0.146 | 1.984E-01 | 1.505E-01 |
| EFR3B      | -0.146 | 5.816E-01 | 8.760E-01 |
| AREL1      | -0.146 | 6.966E-02 | 3.205E-01 |
| CRHR2      | -0.146 | 6.586E-01 | 9.604E-01 |
| RABGGTA    | -0.146 | 1.110E-01 | 3.340E-01 |
| DMAP1      | -0.147 | 1.609E-01 | 5.725E-01 |
| PCBD1      | -0.147 | 3.004E-01 | 3.125E-01 |
| ETV3L      | -0.147 | 7.994E-01 | 5.474E-01 |
| ABHD17B    | -0.147 | 1.667E-01 | 7.692E-01 |
| TRMO       | -0.147 | 9.416E-02 | 7.681E-01 |
| PTGES2     | -0.147 | 1.196E-01 | 3.565E-01 |
| RPL36A     | -0.147 | 2.917E-01 | 8.223E-02 |
| KIF2A      | -0.147 | 2.143E-01 | 4.686E-02 |
| ABLIM1     | -0.147 | 4.076E-01 | 5.337E-01 |
| MIR320A    | -0.147 | 7.196E-01 | 4.339E-02 |
| EXTL2      | -0.147 | 1.469E-01 | 3.657E-01 |
| PHPT1      | -0.147 | 2.796E-01 | 7.746E-01 |
| LRRK1      | -0.147 | 2.901E-01 | 2.260E-01 |
| MRPL44     | -0.147 | 7.148E-02 | 3.686E-01 |
| MRPL28     | -0.147 | 1.877E-01 | 4.096E-01 |
| FGFBP1     | -0.147 | 8.227E-01 | 1.909E-01 |
| NPIPA7     | -0.147 | NA        | 4.311E-01 |
| KRT31      | -0.147 | 8.450E-01 | 6.447E-01 |
| TNFSF13    | -0.147 | 2.963E-01 | 8.164E-01 |
| MIR548O    | -0.147 | 8.259E-01 | 5.974E-02 |
| ZNF23      | -0.147 | 3.742E-01 | 4.612E-01 |
| PCDH11Y    | -0.147 | 8.269E-01 | 8.388E-02 |
| AL049839.2 | -0.147 | 8.080E-01 | 2.471E-01 |
| FAM92A     | -0.147 | 2.131E-01 | 5.768E-01 |
| MTO1       | -0.147 | 1.736E-02 | 6.296E-01 |
| TP53INP1   | -0.147 | 3.152E-01 | 9.166E-01 |
| GRPEL2     | -0.147 | 1.531E-01 | 1.896E-01 |
| WDR83      | -0.147 | 1.823E-01 | 2.064E-01 |
| AFG1L      | -0.148 | 7.033E-02 | 4.954E-01 |
| CROCC      | -0.148 | 1.824E-01 | 1.778E-01 |
| TMEM51     | -0.148 | 3.548E-01 | 6.291E-01 |
| ASB11      | -0.148 | 8.162E-01 | 2.535E-01 |
| CCRL2      | -0.148 | 5.315E-01 | 5.131E-01 |
| TMEM175    | -0.148 | 2.174E-01 | 3.987E-01 |
| USP3       | -0.148 | 1.346E-01 | 6.988E-02 |

|           |        |           |           |
|-----------|--------|-----------|-----------|
| MPST      | -0.148 | 3.366E-01 | 6.578E-01 |
| CCNB1     | -0.148 | 3.618E-01 | 1.957E-01 |
| YBX3      | -0.148 | 2.418E-01 | 1.007E-01 |
| QRSL1     | -0.148 | 1.978E-01 | 6.462E-01 |
| HSBP1L1   | -0.148 | 3.057E-01 | 1.913E-02 |
| SUCNR1    | -0.148 | 6.962E-01 | 6.547E-01 |
| SGSM3     | -0.148 | 1.523E-01 | 1.031E-01 |
| SLC16A10  | -0.148 | 6.372E-01 | 3.196E-01 |
| CHFR      | -0.148 | 4.872E-02 | 4.029E-01 |
| SNRPD1    | -0.148 | 1.305E-01 | 7.242E-01 |
| EIF5A     | -0.148 | 1.420E-01 | 5.758E-01 |
| CXCR2     | -0.148 | 6.834E-01 | 2.080E-01 |
| TONSL     | -0.148 | 2.185E-01 | 1.548E-01 |
| PPARA     | -0.148 | 2.558E-01 | 6.189E-02 |
| PRPF40B   | -0.148 | 2.027E-01 | 2.322E-01 |
| PBOV1     | -0.148 | 7.221E-01 | 5.912E-01 |
| OPN1LW    | -0.148 | NA        | 5.573E-02 |
| PRG2      | -0.148 | 7.538E-01 | 1.059E-01 |
| MAP3K7    | -0.148 | 3.578E-02 | 1.757E-01 |
| ZNF528    | -0.148 | 4.490E-01 | 5.986E-02 |
| ZNF559    | -0.148 | 1.965E-01 | 2.266E-02 |
| PYROXD1   | -0.148 | 9.666E-02 | 9.445E-01 |
| FAM175A   | -0.148 | 1.232E-01 | 7.367E-01 |
| NXPH2     | -0.148 | 8.582E-01 | 2.883E-01 |
| TRIM41    | -0.148 | 3.187E-02 | 3.422E-01 |
| MTCL1     | -0.149 | 5.613E-01 | 1.824E-01 |
| ZNF317    | -0.149 | 2.757E-02 | 7.189E-01 |
| CTDSP1    | -0.149 | 1.209E-01 | 1.135E-01 |
| ADAMTS3   | -0.149 | 6.604E-01 | 5.008E-01 |
| MIR4472-2 | -0.149 | NA        | 1.407E-01 |
| TSPAN12   | -0.149 | 6.134E-01 | 1.400E-01 |
| MCF2L     | -0.149 | 5.519E-01 | 1.268E-01 |
| ENTPD8    | -0.149 | 7.322E-01 | 4.602E-01 |
| ZBTB49    | -0.149 | 5.879E-02 | 2.438E-01 |
| HPS6      | -0.149 | 6.247E-02 | 2.807E-01 |
| PGAP1     | -0.149 | 4.028E-01 | 1.359E-01 |
| ATG4B     | -0.149 | 1.080E-01 | 2.273E-01 |
| IL18      | -0.149 | 5.133E-01 | 4.868E-02 |
| C1QBP     | -0.149 | 1.876E-01 | 1.366E-01 |
| CDCP2     | -0.149 | 7.548E-01 | 1.181E-01 |
| ZNF182    | -0.149 | 1.619E-01 | 1.408E-01 |
| CLUH      | -0.149 | 1.475E-01 | 3.910E-01 |
| RNF166    | -0.149 | 1.596E-01 | 7.775E-01 |
| TMEM161A  | -0.149 | 1.128E-01 | 2.813E-01 |
| KANSL1L   | -0.149 | 1.495E-01 | 6.278E-01 |
| TIMD4     | -0.149 | 7.624E-01 | 7.102E-01 |
| SCART1    | -0.149 | 5.754E-01 | 3.931E-01 |
| DGCR14    | -0.149 | 5.457E-02 | 8.773E-02 |
| ELMO3     | -0.149 | 4.589E-01 | 3.664E-01 |
| OR13D1    | -0.149 | NA        | 1.566E-01 |

|            |        |           |           |
|------------|--------|-----------|-----------|
| BCL10      | -0.149 | 1.369E-01 | 1.161E-01 |
| ATP5A1     | -0.150 | 1.032E-01 | 6.280E-01 |
| SDSL       | -0.150 | 3.940E-01 | 5.120E-01 |
| GIPC3      | -0.150 | 3.999E-01 | 6.223E-01 |
| RNF219     | -0.150 | 7.273E-02 | 4.300E-01 |
| TDRP       | -0.150 | 5.970E-01 | 3.383E-01 |
| ZNF426     | -0.150 | 9.058E-02 | 8.314E-02 |
| LYSMD4     | -0.150 | 1.678E-01 | 4.148E-01 |
| ANKRD33B   | -0.150 | 6.603E-01 | 7.263E-01 |
| ZNF501     | -0.150 | 3.842E-01 | 5.057E-02 |
| MOB3C      | -0.150 | 1.878E-01 | 1.423E-01 |
| N4BP1      | -0.150 | 9.604E-02 | 3.787E-01 |
| OR52E4     | -0.150 | NA        | 1.225E-01 |
| CYSTM1     | -0.150 | 3.976E-01 | 2.596E-01 |
| PLEKHG3    | -0.150 | 3.142E-01 | 1.785E-01 |
| MIR6888    | -0.150 | NA        | 3.248E-01 |
| MIR513B    | -0.150 | NA        | 5.154E-01 |
| RILPL2     | -0.150 | 2.023E-01 | 2.757E-01 |
| PLD6       | -0.150 | 4.251E-01 | 5.496E-01 |
| MAT2B      | -0.150 | 5.312E-02 | 2.234E-01 |
| MRRF       | -0.150 | 1.132E-01 | 7.987E-02 |
| CLDN15     | -0.150 | 2.962E-01 | 2.496E-01 |
| SYNGAP1    | -0.150 | 1.393E-01 | 1.148E-01 |
| RPL41      | -0.150 | 1.603E-01 | 8.734E-01 |
| GFM2       | -0.150 | 8.725E-02 | 7.894E-01 |
| AC104831.1 | -0.150 | 8.168E-01 | 4.447E-01 |
| CDC42SE2   | -0.150 | 9.559E-02 | 1.680E-01 |
| KCP        | -0.150 | 6.020E-01 | 1.480E-01 |
| CD160      | -0.150 | 5.455E-01 | 9.245E-01 |
| APLF       | -0.150 | 2.545E-01 | 8.713E-01 |
| STRIP2     | -0.150 | 5.516E-01 | 4.729E-01 |
| GTF2E2     | -0.150 | 1.278E-01 | 4.385E-01 |
| RPS5       | -0.150 | 1.992E-01 | 2.392E-01 |
| H2AFY2     | -0.150 | 3.994E-01 | 1.149E-01 |
| CRB3       | -0.150 | 4.774E-01 | 8.077E-02 |
| ZNF84      | -0.150 | 2.397E-01 | 1.381E-01 |
| KIF14      | -0.151 | 4.210E-01 | 7.056E-01 |
| AASDH      | -0.151 | 5.051E-02 | 9.524E-01 |
| SCAP       | -0.151 | 3.201E-01 | 9.650E-01 |
| TNFSF8     | -0.151 | 6.471E-01 | 1.748E-01 |
| DDT        | -0.151 | 2.361E-01 | 5.881E-01 |
| ZNF837     | -0.151 | 3.525E-01 | 6.550E-02 |
| HCN3       | -0.151 | 3.773E-01 | 2.164E-01 |
| EGLN3      | -0.151 | 5.888E-01 | 5.690E-01 |
| SCRT1      | -0.151 | 6.448E-01 | 5.577E-02 |
| PHRF1      | -0.151 | 4.994E-02 | 5.781E-01 |
| ZNF302     | -0.151 | 2.715E-01 | 3.359E-01 |
| CKAP4      | -0.151 | 2.351E-01 | 5.938E-01 |
| VSTM2A     | -0.151 | 8.217E-01 | 7.589E-01 |
| DNAJC28    | -0.151 | 2.479E-01 | 4.222E-02 |

|             |        |           |           |
|-------------|--------|-----------|-----------|
| MIR3174     | -0.151 | 7.538E-01 | 7.679E-01 |
| NLRP9       | -0.151 | 7.347E-01 | 9.067E-02 |
| ARRDC2      | -0.151 | 2.290E-01 | 6.135E-01 |
| AKAP8       | -0.151 | 2.969E-02 | 1.624E-02 |
| RPL36AL     | -0.151 | 1.457E-01 | 3.661E-01 |
| MOB3B       | -0.151 | 5.631E-01 | 3.181E-01 |
| NYAP2       | -0.151 | 8.023E-01 | 1.563E-01 |
| CAPN9       | -0.151 | 7.795E-01 | 1.220E-01 |
| STK11IP     | -0.151 | 6.518E-02 | 6.380E-01 |
| SLC5A3      | -0.151 | 2.839E-01 | 8.919E-01 |
| COX7A2      | -0.151 | 1.181E-01 | 4.276E-01 |
| UBA52       | -0.151 | 1.297E-01 | 5.567E-01 |
| LSM6        | -0.151 | 7.399E-02 | 9.010E-02 |
| TTI2        | -0.151 | 1.633E-01 | 5.096E-01 |
| PCDH19      | -0.151 | 6.910E-01 | 3.237E-02 |
| CADPS       | -0.151 | 6.594E-01 | 1.986E-01 |
| ZNF608      | -0.152 | 5.996E-01 | 3.534E-01 |
| FIGNL2      | -0.152 | 7.414E-01 | 2.435E-01 |
| JF816-ZNF32 | -0.152 | 7.827E-01 | 2.273E-01 |
| NLN         | -0.152 | 2.970E-01 | 5.246E-01 |
| TERB2       | -0.152 | 8.218E-01 | 3.600E-02 |
| BEND3       | -0.152 | 2.922E-01 | 2.149E-01 |
| WEE1        | -0.152 | 2.763E-01 | 3.574E-01 |
| SP4         | -0.152 | 1.724E-01 | 6.929E-02 |
| SRSF5       | -0.152 | 1.479E-01 | 3.815E-01 |
| NINL        | -0.152 | 5.743E-01 | 1.774E-01 |
| SOX7        | -0.152 | 6.387E-01 | 3.922E-01 |
| IFNL2       | -0.152 | 8.232E-01 | 6.537E-01 |
| CXCL8       | -0.152 | 7.203E-01 | 8.428E-02 |
| TMEM114     | -0.152 | 8.570E-01 | 4.459E-01 |
| GPBP1       | -0.152 | 1.032E-02 | 1.257E-01 |
| THEM5       | -0.152 | 5.438E-01 | 3.175E-01 |
| CETN3       | -0.152 | 9.457E-02 | 5.309E-02 |
| LGALS2      | -0.152 | 6.600E-01 | 1.048E-01 |
| DAB2IP      | -0.152 | 2.831E-01 | 3.965E-02 |
| DHRS1       | -0.152 | 1.996E-01 | 2.440E-01 |
| MACROD2     | -0.152 | 7.299E-01 | 1.624E-01 |
| TRIB2       | -0.152 | 5.327E-01 | 1.403E-01 |
| DNAI2       | -0.152 | 7.295E-01 | 4.652E-01 |
| ORC2        | -0.152 | 2.915E-02 | 1.876E-01 |
| PDE4A       | -0.152 | 3.339E-01 | 2.960E-01 |
| SF3A2       | -0.153 | 8.443E-02 | 5.677E-01 |
| AC234771.5  | -0.153 | NA        | 6.093E-02 |
| HTT         | -0.153 | 4.579E-02 | 1.910E-01 |
| ARID1B      | -0.153 | 5.413E-02 | 1.393E-02 |
| MIR4440     | -0.153 | NA        | 1.620E-01 |
| LDLRAD4     | -0.153 | 5.311E-01 | 6.903E-01 |
| SAFB2       | -0.153 | 2.618E-02 | 6.226E-01 |
| ZNF596      | -0.153 | 2.941E-01 | 3.236E-01 |
| TP53I11     | -0.153 | 4.374E-01 | 1.834E-01 |



|           |        |           |           |
|-----------|--------|-----------|-----------|
| TNFRSF10A | -0.153 | 3.714E-01 | 5.429E-01 |
| PRR14L    | -0.153 | 1.311E-01 | 1.931E-01 |
| ELL2      | -0.153 | 3.809E-01 | 6.783E-02 |
| C19orf53  | -0.153 | 1.495E-01 | 9.349E-01 |
| MED16     | -0.153 | 9.918E-02 | 5.073E-01 |
| DSC1      | -0.153 | 7.816E-01 | 1.824E-01 |
| TAF9      | -0.153 | 7.950E-02 | 1.435E-01 |
| ACSM2B    | -0.153 | 8.145E-01 | 2.523E-01 |
| ZSCAN12   | -0.153 | 2.917E-01 | 4.450E-02 |
| CRAMP1    | -0.153 | 1.086E-01 | 5.820E-02 |
| RECQL4    | -0.153 | 3.331E-01 | 7.958E-02 |
| PPP1R32   | -0.153 | 4.263E-01 | 3.173E-01 |
| HARS      | -0.153 | 2.442E-02 | 3.758E-02 |
| CBLB      | -0.153 | 1.506E-01 | 4.003E-01 |
| TAX1BP3   | -0.153 | 1.935E-01 | 5.121E-01 |
| PNKD      | -0.153 | 2.396E-01 | 2.398E-01 |
| PRKN      | -0.153 | 5.552E-01 | 7.173E-01 |
| MIR1226   | -0.153 | NA        | 1.007E-01 |
| PRDX5     | -0.154 | 2.056E-01 | 4.626E-01 |
| PFDN5     | -0.154 | 1.285E-01 | 7.833E-01 |
| ZNF561    | -0.154 | 1.878E-01 | 1.320E-01 |
| NDUFB7    | -0.154 | 2.146E-01 | 5.404E-01 |
| ZCCHC9    | -0.154 | 1.639E-02 | 8.059E-02 |
| EVA1A     | -0.154 | 6.873E-01 | 7.359E-01 |
| B2M       | -0.154 | 4.237E-01 | 2.553E-01 |
| SEBOX     | -0.154 | NA        | 7.508E-01 |
| POLR2J2   | -0.154 | 8.044E-01 | 3.334E-02 |
| MIR646    | -0.154 | NA        | 1.851E-02 |
| DSG2      | -0.154 | 4.444E-01 | 1.935E-01 |
| STX16     | -0.154 | 8.209E-02 | 1.563E-01 |
| LTV1      | -0.154 | 3.430E-02 | 2.873E-02 |
| ACSBG2    | -0.154 | 5.001E-01 | 4.518E-02 |
| CYTH1     | -0.154 | 1.290E-01 | 2.005E-01 |
| ADRA1B    | -0.154 | 7.333E-01 | 6.114E-01 |
| RAP1GAP2  | -0.154 | 4.930E-01 | 7.187E-01 |
| ERCC5     | -0.154 | 1.107E-01 | 1.131E-01 |
| PRR25     | -0.154 | 6.384E-01 | 3.531E-01 |
| ETNK2     | -0.154 | 4.053E-01 | 2.834E-01 |
| EBLN1     | -0.154 | NA        | 2.638E-01 |
| INTS10    | -0.154 | 7.797E-02 | 3.416E-01 |
| FBXO41    | -0.154 | 3.555E-01 | 5.331E-01 |
| CYHR1     | -0.154 | 1.398E-01 | 3.528E-01 |
| HSD17B11  | -0.155 | 4.492E-01 | 2.234E-01 |
| RPS11     | -0.155 | 1.576E-01 | 7.340E-03 |
| TMEM102   | -0.155 | 2.518E-01 | 1.091E-01 |
| SUGP1     | -0.155 | 1.581E-02 | 4.950E-01 |
| INO80C    | -0.155 | 2.019E-01 | 8.091E-01 |
| PIGG      | -0.155 | 4.846E-02 | 7.430E-02 |
| PIF1      | -0.155 | 3.325E-01 | 3.264E-01 |
| ESD       | -0.155 | 1.517E-01 | 1.949E-01 |

|           |        |           |           |
|-----------|--------|-----------|-----------|
| MYO1F     | -0.155 | 5.311E-01 | 4.235E-01 |
| TIGAR     | -0.155 | 2.445E-01 | 2.694E-02 |
| OR10A3    | -0.155 | 6.977E-01 | 8.582E-02 |
| NDUFA2    | -0.155 | 1.491E-01 | 3.800E-01 |
| FAM102B   | -0.155 | 3.332E-01 | 1.408E-01 |
| DISP2     | -0.155 | 6.204E-01 | 8.305E-01 |
| TNKS      | -0.155 | 1.615E-01 | 3.040E-01 |
| ORMDL1    | -0.155 | 4.108E-02 | 5.690E-01 |
| OR13A1    | -0.155 | 6.912E-01 | 8.967E-01 |
| ZNF286B   | -0.155 | 3.241E-01 | 6.001E-01 |
| GIMAP7    | -0.155 | 5.097E-01 | 6.887E-01 |
| FAM216A   | -0.155 | 3.694E-01 | 9.614E-02 |
| TMEM120B  | -0.155 | 7.182E-02 | 5.714E-02 |
| RAB40B    | -0.155 | 2.571E-01 | 4.945E-01 |
| UCHL3     | -0.155 | 1.560E-01 | 2.085E-02 |
| S100A7A   | -0.155 | 8.750E-01 | 1.029E-01 |
| ASB9      | -0.155 | 5.184E-01 | 2.888E-01 |
| SLC35G6   | -0.155 | 6.840E-01 | 1.846E-02 |
| GPR63     | -0.155 | 5.432E-01 | 4.212E-01 |
| MIR298    | -0.156 | NA        | 7.851E-01 |
| RFC3      | -0.156 | 2.758E-01 | 7.881E-02 |
| CCDC28B   | -0.156 | 3.472E-01 | 8.955E-01 |
| MIR647    | -0.156 | 4.298E-01 | 2.756E-02 |
| OPRD1     | -0.156 | 5.125E-01 | 4.299E-02 |
| MIR153-1  | -0.156 | NA        | 4.997E-01 |
| OR6C74    | -0.156 | NA        | 2.437E-01 |
| KRTAP6-2  | -0.156 | NA        | 1.361E-01 |
| ZNF124    | -0.156 | 3.251E-01 | 5.328E-01 |
| ABCE1     | -0.156 | 1.000E-01 | 6.010E-01 |
| FABP12    | -0.156 | 8.635E-01 | 2.580E-01 |
| CCR8      | -0.156 | 6.669E-01 | 4.375E-01 |
| CHPT1     | -0.156 | 4.358E-01 | 2.278E-01 |
| TMEM145   | -0.156 | 6.543E-01 | 9.711E-01 |
| EDA       | -0.156 | 6.184E-01 | 1.612E-01 |
| CNOT7     | -0.156 | 6.230E-02 | 6.364E-02 |
| MAGEA9B   | -0.156 | 8.526E-01 | 1.068E-01 |
| ASAH2     | -0.156 | 4.289E-01 | 5.868E-01 |
| C22orf23  | -0.156 | 4.128E-01 | 6.830E-02 |
| RNF34     | -0.156 | 4.318E-03 | 7.354E-01 |
| ST6GALNAC | -0.156 | 5.832E-01 | 1.945E-01 |
| PARPBP    | -0.156 | 2.356E-01 | 3.587E-01 |
| FOLR2     | -0.156 | 6.367E-01 | 3.433E-01 |
| GSDMD     | -0.156 | 2.573E-01 | 2.063E-01 |
| MYRF      | -0.156 | 6.361E-01 | 8.510E-02 |
| COL11A2   | -0.156 | 5.331E-01 | 3.125E-02 |
| LRP2BP    | -0.157 | 2.378E-01 | 7.393E-01 |
| SERPIND1  | -0.157 | 7.378E-01 | 1.973E-01 |
| LINGO2    | -0.157 | 8.044E-01 | 6.439E-02 |
| C18orf21  | -0.157 | 5.764E-02 | 2.810E-02 |
| KLRB1     | -0.157 | 5.864E-01 | 2.954E-01 |

|          |        |           |           |
|----------|--------|-----------|-----------|
| SIVA1    | -0.157 | 1.585E-01 | 1.810E-01 |
| SMYD1    | -0.157 | NA        | 2.119E-01 |
| ADRA1D   | -0.157 | 6.586E-01 | 7.955E-01 |
| NANOGP8  | -0.157 | 8.038E-01 | 3.828E-01 |
| NLE1     | -0.157 | 1.288E-01 | 4.758E-02 |
| NISCH    | -0.157 | 1.273E-01 | 9.589E-02 |
| SLC9A3   | -0.157 | 6.046E-01 | 6.251E-02 |
| PIIP5K2  | -0.157 | 7.165E-02 | 3.013E-01 |
| APRT     | -0.157 | 1.824E-01 | 9.979E-02 |
| BIVM     | -0.157 | 9.111E-02 | 2.042E-02 |
| BMP3     | -0.157 | 7.684E-01 | 5.923E-01 |
| MIR3667  | -0.157 | NA        | 7.699E-01 |
| KRTAP6-3 | -0.157 | NA        | 2.914E-01 |
| TP73     | -0.157 | 6.254E-01 | 9.114E-01 |
| USP9Y    | -0.157 | 7.994E-01 | 5.264E-02 |
| ADCY2    | -0.157 | 6.969E-01 | 2.378E-01 |
| TNFSF10  | -0.157 | 5.926E-01 | 3.838E-01 |
| TUSC3    | -0.157 | 4.013E-01 | 5.169E-01 |
| PHB2     | -0.157 | 4.599E-02 | 6.660E-01 |
| VPS36    | -0.157 | 1.573E-01 | 9.074E-02 |
| FAM98B   | -0.158 | 2.915E-02 | 1.725E-02 |
| BCKDHB   | -0.158 | 2.848E-01 | 3.353E-01 |
| GALNT18  | -0.158 | 4.261E-01 | 6.895E-02 |
| LYRM7    | -0.158 | 8.045E-02 | 1.613E-01 |
| TMEM161B | -0.158 | 1.139E-01 | 3.244E-01 |
| DGKD     | -0.158 | 2.135E-01 | 4.297E-02 |
| HLA-DMB  | -0.158 | 5.972E-01 | 4.014E-01 |
| MT1HL1   | -0.158 | NA        | 6.308E-02 |
| FBXO30   | -0.158 | 9.749E-02 | 5.636E-01 |
| SPDYA    | -0.158 | 3.302E-01 | 6.068E-01 |
| OR6B2    | -0.158 | NA        | 9.034E-01 |
| GALT     | -0.158 | 1.226E-01 | 4.276E-01 |
| FGF17    | -0.158 | 6.949E-01 | 8.082E-02 |
| LIPE     | -0.158 | 5.032E-01 | 4.490E-01 |
| DUS1L    | -0.158 | 1.249E-01 | 7.833E-01 |
| POLR1B   | -0.158 | 1.046E-01 | 6.898E-01 |
| MT1X     | -0.158 | 6.521E-01 | 6.077E-02 |
| CATSPER1 | -0.158 | 6.935E-01 | 3.054E-01 |
| WNT1     | -0.158 | 7.114E-01 | 4.146E-01 |
| PRDM11   | -0.158 | 3.642E-01 | 3.822E-01 |
| RPRM     | -0.158 | 7.057E-01 | 5.569E-01 |
| SP100    | -0.158 | 2.223E-01 | 2.594E-01 |
| SH3D21   | -0.158 | 3.625E-01 | 7.230E-01 |
| DDX54    | -0.158 | 3.274E-02 | 5.167E-01 |
| FAM212B  | -0.158 | 2.256E-01 | 2.947E-01 |
| CCNB1IP1 | -0.158 | 1.195E-01 | 3.616E-01 |
| MKRN2OS  | -0.158 | 5.484E-01 | 9.421E-01 |
| ZNF440   | -0.158 | 4.398E-01 | 4.837E-01 |
| SLC9B1   | -0.158 | 2.843E-01 | 2.691E-01 |
| PGGT1B   | -0.158 | 1.666E-02 | 8.666E-01 |

|            |        |           |           |
|------------|--------|-----------|-----------|
| MIR4526    | -0.158 | NA        | 5.255E-01 |
| PIK3C3     | -0.159 | 6.857E-02 | 6.299E-01 |
| SCX        | -0.159 | 5.299E-01 | 3.893E-02 |
| RXRG       | -0.159 | 7.371E-01 | 1.417E-01 |
| DEPDC5     | -0.159 | 7.451E-02 | 4.907E-01 |
| PRB1       | -0.159 | NA        | 1.695E-01 |
| ELP5       | -0.159 | 9.975E-02 | 1.727E-01 |
| C5orf56    | -0.159 | 3.781E-01 | 1.725E-01 |
| RASL11A    | -0.159 | 5.697E-01 | 3.792E-01 |
| BFAR       | -0.159 | 1.641E-02 | 1.377E-01 |
| SEMA3F     | -0.159 | 4.000E-01 | 8.683E-02 |
| EGF        | -0.159 | 7.280E-01 | 1.175E-01 |
| MT1H       | -0.159 | 7.271E-01 | 5.024E-01 |
| TRAPPC13   | -0.159 | 2.481E-02 | 3.398E-01 |
| ERCC8      | -0.159 | 2.054E-02 | 2.090E-01 |
| TMEM177    | -0.159 | 1.097E-01 | 1.513E-01 |
| NR1I2      | -0.159 | 6.594E-01 | 3.543E-01 |
| C6orf203   | -0.159 | 2.760E-01 | 1.466E-01 |
| USP15      | -0.159 | 2.051E-02 | 2.323E-02 |
| HAUS7      | -0.159 | 3.218E-01 | 7.504E-02 |
| PIM3       | -0.159 | 2.113E-01 | 5.927E-01 |
| NBEA       | -0.159 | 6.419E-01 | 5.193E-02 |
| PCDH15     | -0.159 | 7.563E-01 | 1.532E-01 |
| CNKSR1     | -0.159 | 3.054E-01 | 6.321E-02 |
| AL136295.5 | -0.159 | 3.100E-01 | 9.117E-02 |
| AHCYL2     | -0.159 | 1.989E-01 | 5.536E-01 |
| CRACR2B    | -0.159 | 5.902E-01 | 1.521E-01 |
| CD300LF    | -0.159 | 6.057E-01 | 5.983E-01 |
| C3orf49    | -0.159 | 3.735E-01 | 2.357E-01 |
| KIAA0319   | -0.160 | 7.049E-01 | 6.886E-01 |
| TRAPPC2L   | -0.160 | 1.097E-01 | 3.965E-01 |
| ASPSR1     | -0.160 | 1.902E-01 | 5.621E-01 |
| C19orf70   | -0.160 | 1.834E-01 | 2.910E-02 |
| SLC43A1    | -0.160 | 4.967E-01 | 3.945E-01 |
| ADCK5      | -0.160 | 2.027E-01 | 2.832E-01 |
| ZNF784     | -0.160 | 1.930E-01 | 1.523E-01 |
| SH3GL3     | -0.160 | 8.071E-01 | 2.329E-01 |
| RPL31      | -0.160 | 1.513E-01 | 5.740E-01 |
| FBXL19     | -0.160 | 9.191E-02 | 6.544E-01 |
| MIR1827    | -0.160 | NA        | 5.481E-01 |
| OR5B21     | -0.160 | NA        | 3.342E-01 |
| SELENOV    | -0.160 | 8.502E-01 | 7.276E-01 |
| SPRED1     | -0.160 | 2.922E-01 | 4.281E-02 |
| ZNF736     | -0.160 | 3.403E-01 | 1.739E-01 |
| AGAP2      | -0.160 | 5.146E-01 | 4.532E-02 |
| COLCA2     | -0.160 | 6.321E-01 | 1.337E-01 |
| FOXK1      | -0.160 | 2.257E-01 | 6.872E-02 |
| ASCC3      | -0.160 | 1.556E-01 | 6.611E-01 |
| SBK1       | -0.160 | 6.820E-01 | 1.392E-01 |
| MOK        | -0.160 | 3.736E-01 | 5.648E-01 |

|            |        |           |           |
|------------|--------|-----------|-----------|
| ERF        | -0.161 | 7.384E-02 | 2.297E-01 |
| KBTBD7     | -0.161 | 1.658E-01 | 5.924E-01 |
| MMAA       | -0.161 | 8.236E-02 | 1.642E-01 |
| PXK        | -0.161 | 1.978E-01 | 4.677E-01 |
| CHD1       | -0.161 | 6.799E-02 | 9.408E-01 |
| AC008878.3 | -0.161 | 8.553E-01 | 5.237E-01 |
| SOCS7      | -0.161 | 2.880E-01 | 2.619E-01 |
| ANKRD13D   | -0.161 | 1.791E-01 | 1.254E-02 |
| NDUFV2     | -0.161 | 1.592E-01 | 3.998E-01 |
| OGFR       | -0.161 | 1.095E-01 | 3.083E-02 |
| EEF1B2     | -0.161 | 1.458E-01 | 3.816E-02 |
| EEF1A1     | -0.161 | 9.483E-02 | 1.348E-01 |
| TIPARP     | -0.161 | 3.628E-01 | 2.978E-01 |
| IL15RA     | -0.161 | 5.436E-01 | 2.595E-01 |
| BRD8       | -0.161 | 3.200E-02 | 2.083E-01 |
| AC117457.1 | -0.161 | NA        | 6.731E-02 |
| FRMD8      | -0.161 | 1.232E-01 | 3.663E-01 |
| MIR4253    | -0.161 | NA        | 7.808E-01 |
| UBL5       | -0.161 | 1.038E-01 | 1.833E-01 |
| CREB5      | -0.161 | 5.758E-01 | 7.433E-01 |
| OR2B3      | -0.161 | NA        | 3.144E-01 |
| OR6C6      | -0.161 | NA        | 6.756E-01 |
| STAP2      | -0.161 | 3.558E-01 | 5.322E-02 |
| PRR5       | -0.161 | 2.158E-01 | 7.169E-01 |
| SRSF6      | -0.161 | 8.374E-02 | 5.096E-01 |
| SLFN5      | -0.161 | 3.729E-01 | 3.223E-01 |
| ITGAX      | -0.161 | 5.713E-01 | 3.885E-01 |
| ZNF696     | -0.161 | 1.078E-01 | 4.657E-01 |
| HOXB7      | -0.162 | 3.292E-01 | 1.822E-01 |
| CD200R1L   | -0.162 | 7.220E-01 | 3.588E-01 |
| SERINC2    | -0.162 | 4.664E-01 | 1.578E-01 |
| GMNN       | -0.162 | 2.462E-01 | 8.832E-02 |
| AES        | -0.162 | 2.042E-01 | 2.697E-01 |
| CLNS1A     | -0.162 | 6.228E-02 | 7.799E-02 |
| LIG4       | -0.162 | 1.359E-01 | 8.791E-01 |
| USE1       | -0.162 | 1.232E-01 | 6.878E-02 |
| HIST2H2AC  | -0.162 | 4.151E-01 | 2.516E-01 |
| BHLHA15    | -0.162 | 6.387E-01 | 9.753E-03 |
| ARHGEF2    | -0.162 | 1.269E-01 | 3.364E-01 |
| CD22       | -0.162 | 6.805E-01 | 5.272E-01 |
| PRAMEF12   | -0.162 | 9.149E-01 | 5.749E-01 |
| LRRIQ1     | -0.162 | 7.198E-01 | 4.179E-01 |
| SH3GLB2    | -0.162 | 3.096E-01 | 1.859E-01 |
| ELFN1      | -0.162 | 4.477E-01 | 1.210E-01 |
| HINT1      | -0.162 | 1.427E-01 | 1.705E-02 |
| HIRA       | -0.162 | 5.004E-02 | 2.940E-01 |
| NEURL4     | -0.162 | 5.646E-02 | 1.390E-01 |
| POLL       | -0.162 | 4.863E-02 | 5.203E-01 |
| PHF10      | -0.162 | 3.078E-02 | 3.367E-01 |
| AKAP8L     | -0.163 | 7.020E-02 | 8.635E-01 |

|           |        |           |           |
|-----------|--------|-----------|-----------|
| ANHX      | -0.163 | NA        | 5.152E-01 |
| HIST1H2BA | -0.163 | NA        | 1.642E-01 |
| SPANXA2   | -0.163 | NA        | 7.136E-02 |
| GAK       | -0.163 | 1.904E-02 | 1.856E-01 |
| GABRB2    | -0.163 | 7.659E-01 | 3.238E-01 |
| SETMAR    | -0.163 | 2.122E-01 | 1.262E-01 |
| CBX5      | -0.163 | 2.359E-01 | 9.055E-01 |
| REP15     | -0.163 | 4.244E-01 | 9.153E-01 |
| RPP25     | -0.163 | 3.966E-01 | 7.728E-01 |
| FAM171A1  | -0.163 | 5.749E-01 | 1.687E-01 |
| C12orf45  | -0.163 | 1.406E-01 | 4.882E-03 |
| STAT6     | -0.163 | 1.416E-01 | 2.546E-01 |
| GAB3      | -0.163 | 4.841E-01 | 1.045E-01 |
| ZBTB7A    | -0.163 | 7.285E-02 | 7.041E-01 |
| ZCCHC10   | -0.163 | 9.234E-03 | 9.863E-02 |
| RPS15A    | -0.163 | 1.402E-01 | 9.201E-02 |
| KHDC1     | -0.163 | 5.792E-01 | 1.125E-01 |
| CCDC68    | -0.163 | 5.515E-01 | 2.133E-01 |
| SLC35D1   | -0.163 | 2.090E-01 | 3.815E-01 |
| NRDE2     | -0.163 | 2.194E-02 | 4.354E-01 |
| MRPS27    | -0.163 | 3.079E-02 | 2.535E-01 |
| GSTO2     | -0.163 | 3.378E-01 | 1.347E-01 |
| TYW5      | -0.163 | 1.526E-02 | 2.130E-01 |
| KRTCAP3   | -0.163 | 5.610E-01 | 1.130E-01 |
| NDUFA9    | -0.163 | 5.584E-02 | 1.078E-01 |
| RBM25     | -0.163 | 4.739E-02 | 1.707E-02 |
| GPX1      | -0.163 | 2.317E-01 | 1.331E-01 |
| HNRNPCL3  | -0.163 | NA        | 8.485E-01 |
| HRAS      | -0.163 | 2.531E-01 | 1.224E-01 |
| MIR606    | -0.163 | NA        | 2.395E-01 |
| GEN1      | -0.163 | 1.262E-01 | 2.411E-01 |
| DNAAF2    | -0.164 | 3.423E-02 | 4.316E-01 |
| HES1      | -0.164 | 3.384E-01 | 4.427E-01 |
| TBPL1     | -0.164 | 4.897E-02 | 7.220E-01 |
| DNASE1L2  | -0.164 | 5.228E-01 | 5.081E-01 |
| FAM120B   | -0.164 | 8.569E-03 | 1.280E-01 |
| EIF3G     | -0.164 | 6.515E-02 | 2.211E-02 |
| ZNF202    | -0.164 | 5.735E-02 | 4.834E-01 |
| PDHA2     | -0.164 | NA        | 4.738E-01 |
| C12orf73  | -0.164 | 5.929E-02 | 6.246E-01 |
| AGPAT5    | -0.164 | 1.691E-01 | 6.362E-02 |
| SULT1A4   | -0.164 | 8.147E-01 | 7.526E-02 |
| CLCN3     | -0.164 | 2.395E-01 | 8.615E-03 |
| SLX4      | -0.164 | 7.652E-02 | 2.264E-01 |
| BRAT1     | -0.164 | 6.857E-02 | 3.928E-01 |
| APOBR     | -0.164 | 5.492E-01 | 8.486E-01 |
| SKIV2L2   | -0.164 | 5.457E-02 | 3.205E-01 |
| ATXN2     | -0.164 | 3.766E-02 | 5.585E-02 |
| RPL35A    | -0.164 | 8.534E-02 | 5.550E-01 |
| PRAMEF7   | -0.164 | NA        | 8.721E-02 |

|            |        |           |           |
|------------|--------|-----------|-----------|
| MTX2       | -0.164 | 3.252E-02 | 8.415E-02 |
| SWAP70     | -0.164 | 1.322E-01 | 2.228E-02 |
| TTBK1      | -0.164 | 5.518E-01 | 8.884E-01 |
| TRIM35     | -0.164 | 1.029E-01 | 3.385E-01 |
| SMARCD1    | -0.164 | 1.002E-02 | 4.584E-01 |
| YTHDC2     | -0.164 | 1.036E-01 | 3.972E-01 |
| MRGPRG     | -0.164 | NA        | 5.574E-01 |
| MAPK12     | -0.165 | 4.778E-01 | 1.942E-01 |
| RIOK3      | -0.165 | 1.470E-01 | 1.073E-01 |
| INAFM2     | -0.165 | 2.082E-01 | 4.117E-01 |
| SLC26A2    | -0.165 | 4.121E-01 | 9.070E-02 |
| CCDC18     | -0.165 | 1.834E-01 | 2.474E-01 |
| CLASRP     | -0.165 | 9.216E-02 | 6.743E-01 |
| AC020636.2 | -0.165 | NA        | 2.958E-01 |
| MIR6719    | -0.165 | 7.397E-01 | 4.156E-02 |
| APOL3      | -0.165 | 4.935E-01 | 4.105E-02 |
| MAPKBP1    | -0.165 | 1.291E-01 | 3.014E-01 |
| UQCRQ      | -0.165 | 1.952E-01 | 1.225E-01 |
| KIF4B      | -0.165 | 5.864E-01 | 7.229E-01 |
| UBE2L5P    | -0.165 | 2.842E-01 | 5.881E-02 |
| MAP7       | -0.165 | 2.452E-01 | 5.810E-01 |
| UBB        | -0.165 | 1.340E-01 | 8.715E-02 |
| SMDT1      | -0.165 | 1.664E-01 | 5.017E-02 |
| CD274      | -0.165 | 6.549E-01 | 5.771E-01 |
| EFHC1      | -0.165 | 2.269E-01 | 2.507E-01 |
| CAPN3      | -0.165 | 5.034E-01 | 5.895E-02 |
| ARL4D      | -0.165 | 5.293E-01 | 9.574E-01 |
| CSNK1E     | -0.165 | 7.856E-02 | 1.542E-01 |
| MYH8       | -0.165 | 7.396E-01 | 3.289E-02 |
| BORCS8     | -0.165 | 8.513E-02 | 1.759E-01 |
| OR2Y1      | -0.165 | NA        | 1.013E-01 |
| KRTAP13-3  | -0.165 | NA        | 2.649E-01 |
| HTR3D      | -0.165 | NA        | 2.558E-01 |
| RUBCNL     | -0.166 | 6.243E-01 | 3.858E-01 |
| HMBOX1     | -0.166 | 9.961E-02 | 4.218E-01 |
| EMID1      | -0.166 | 5.829E-01 | 7.912E-01 |
| PLB1       | -0.166 | 5.065E-01 | 6.656E-01 |
| TIA1       | -0.166 | 1.427E-01 | 5.024E-01 |
| AL603832.3 | -0.166 | 6.905E-01 | 3.776E-01 |
| FBXW7      | -0.166 | 3.617E-02 | 5.181E-02 |
| AVP        | -0.166 | 8.430E-01 | 6.594E-01 |
| SRC        | -0.166 | 2.872E-01 | 4.867E-01 |
| SLC5A7     | -0.166 | 7.934E-01 | 4.030E-02 |
| AAAS       | -0.166 | 7.463E-03 | 1.770E-01 |
| ABCD4      | -0.166 | 2.950E-02 | 3.145E-01 |
| LRRC14     | -0.166 | 7.090E-02 | 2.382E-02 |
| FRYL       | -0.166 | 5.207E-02 | 3.540E-01 |
| CNN2       | -0.166 | 2.615E-01 | 3.858E-01 |
| ZNF248     | -0.166 | 1.370E-01 | 2.757E-01 |
| RNASE10    | -0.166 | 6.574E-01 | 2.481E-01 |

|           |        |           |           |
|-----------|--------|-----------|-----------|
| KRT33A    | -0.166 | 7.426E-01 | 2.607E-01 |
| TAPBPL    | -0.166 | 3.006E-01 | 5.852E-01 |
| MED31     | -0.166 | 4.195E-02 | 4.767E-01 |
| TRIM66    | -0.166 | 2.362E-01 | 2.398E-02 |
| TDRD6     | -0.166 | 4.738E-01 | 7.131E-01 |
| PRR35     | -0.166 | 7.975E-01 | 3.586E-02 |
| PJA1      | -0.166 | 1.502E-01 | 6.422E-01 |
| PDILT     | -0.166 | NA        | 3.355E-01 |
| CNTNAP4   | -0.167 | 8.428E-01 | 4.526E-01 |
| PLD4      | -0.167 | 6.027E-01 | 9.191E-02 |
| TEN1-CDK3 | -0.167 | 3.383E-01 | 1.467E-01 |
| CYP26B1   | -0.167 | 6.417E-01 | 1.331E-02 |
| TPRN      | -0.167 | 1.968E-01 | 3.417E-03 |
| ZNF578    | -0.167 | 6.387E-01 | 6.937E-01 |
| CYP2R1    | -0.167 | 9.126E-02 | 1.853E-01 |
| MIPOL1    | -0.167 | 3.470E-01 | 8.808E-01 |
| PSTPIP1   | -0.167 | 5.577E-01 | 1.074E-01 |
| TRIML2    | -0.167 | 8.405E-01 | 7.545E-02 |
| PLS1      | -0.167 | 4.979E-01 | 8.358E-02 |
| TRMT2A    | -0.167 | 1.074E-01 | 4.640E-01 |
| OR10A4    | -0.167 | NA        | 6.357E-01 |
| MIR4424   | -0.167 | NA        | 1.897E-01 |
| WDR41     | -0.167 | 8.244E-02 | 4.238E-01 |
| MEX3A     | -0.167 | 5.629E-01 | 1.490E-01 |
| ACCS      | -0.167 | 3.916E-01 | 5.505E-03 |
| PRAME     | -0.167 | 8.298E-01 | 1.872E-01 |
| ZDHHC17   | -0.167 | 7.926E-02 | 1.001E-01 |
| CSNK1A1   | -0.167 | 1.492E-01 | 3.997E-02 |
| UCN3      | -0.167 | 8.413E-01 | 9.389E-02 |
| DDX20     | -0.167 | 1.342E-02 | 4.784E-01 |
| ZKSCAN8   | -0.167 | 8.955E-02 | 4.738E-01 |
| HIST1H2AH | -0.167 | 6.073E-01 | 4.245E-01 |
| LUC7L3    | -0.167 | 9.856E-02 | 2.906E-01 |
| OIT3      | -0.167 | 6.367E-01 | 7.152E-01 |
| SH3BP2    | -0.168 | 1.135E-01 | 9.435E-01 |
| DCAF15    | -0.168 | 2.724E-02 | 9.444E-01 |
| MIR4797   | -0.168 | NA        | 6.829E-02 |
| CSTA      | -0.168 | 6.273E-01 | 2.594E-02 |
| STK17A    | -0.168 | 3.478E-01 | 7.390E-02 |
| PKDCC     | -0.168 | 6.847E-01 | 3.660E-01 |
| LIMA1     | -0.168 | 3.070E-01 | 2.018E-02 |
| PRAMEF20  | -0.168 | NA        | 1.251E-01 |
| LY6K      | -0.168 | 6.155E-01 | 3.928E-01 |
| KRR1      | -0.168 | 4.774E-02 | 3.463E-01 |
| MUM1      | -0.168 | 4.925E-02 | 1.350E-01 |
| NRG4      | -0.168 | 5.561E-01 | 1.082E-01 |
| MIR5007   | -0.168 | NA        | 3.910E-01 |
| SSTR2     | -0.168 | 5.574E-01 | 4.875E-02 |
| TNFRSF8   | -0.169 | 5.832E-01 | 1.523E-01 |
| FEM1A     | -0.169 | 1.980E-01 | 2.262E-01 |



|            |        |           |           |
|------------|--------|-----------|-----------|
| CRYBG1     | -0.169 | 3.735E-01 | 1.441E-02 |
| HLA-DRA    | -0.169 | 5.935E-01 | 2.392E-01 |
| AL365205.1 | -0.169 | 3.597E-01 | 5.469E-01 |
| ALG13      | -0.169 | 5.835E-02 | 5.292E-02 |
| KIAA0907   | -0.169 | 1.621E-01 | 4.749E-01 |
| CCL20      | -0.169 | 7.357E-01 | 2.449E-01 |
| ITGA3      | -0.169 | 5.018E-01 | 3.847E-02 |
| CACNA1D    | -0.169 | 7.122E-01 | 2.411E-01 |
| ZNF90      | -0.169 | 5.896E-01 | 1.572E-01 |
| POMT2      | -0.169 | 6.722E-02 | 2.816E-02 |
| KIAA0586   | -0.169 | 6.857E-02 | 5.298E-02 |
| RPS17      | -0.169 | 1.140E-01 | 1.404E-01 |
| TSPYL4     | -0.169 | 1.087E-01 | 1.172E-01 |
| EPHX2      | -0.169 | 5.348E-01 | 1.825E-01 |
| ZBTB1      | -0.169 | 3.889E-02 | 4.550E-02 |
| SAMD13     | -0.169 | 5.858E-01 | 4.105E-02 |
| HYPK       | -0.169 | 2.457E-01 | 1.004E-01 |
| C20orf194  | -0.169 | 1.903E-01 | 5.455E-01 |
| ATAD3C     | -0.169 | 5.335E-01 | 3.471E-01 |
| LRRC8C     | -0.169 | 3.238E-01 | 1.451E-02 |
| MRI1       | -0.169 | 7.945E-02 | 4.112E-02 |
| TEFM       | -0.169 | 2.946E-02 | 3.003E-02 |
| SLX1B      | -0.169 | 6.352E-01 | 3.398E-01 |
| MRPL16     | -0.169 | 8.987E-02 | 2.829E-01 |
| FBXO33     | -0.169 | 1.415E-02 | 1.239E-02 |
| SLC14A2    | -0.169 | 5.859E-01 | 3.585E-02 |
| ESCO2      | -0.169 | 3.093E-01 | 9.070E-02 |
| ZNF713     | -0.169 | 2.551E-01 | 5.933E-02 |
| PUS1       | -0.170 | 9.013E-02 | 8.530E-02 |
| SOCS4      | -0.170 | 1.998E-02 | 4.930E-01 |
| C2CD5      | -0.170 | 3.806E-02 | 4.880E-01 |
| TENM3      | -0.170 | 7.122E-01 | 1.190E-01 |
| RAPGEF4    | -0.170 | 3.131E-01 | 2.578E-02 |
| LETMD1     | -0.170 | 5.511E-02 | 5.233E-02 |
| SELL       | -0.170 | 6.693E-01 | 8.231E-01 |
| IBTK       | -0.170 | 2.646E-02 | 9.450E-02 |
| NDUFS7     | -0.170 | 9.005E-02 | 3.863E-01 |
| ATP2B1     | -0.170 | 1.956E-01 | 1.561E-01 |
| CECR6      | -0.170 | 5.047E-01 | 6.674E-02 |
| DENND3     | -0.170 | 2.597E-01 | 2.523E-01 |
| COMMD10    | -0.170 | 4.026E-02 | 3.843E-02 |
| HMG5       | -0.171 | 4.330E-01 | 1.832E-02 |
| HUS1B      | -0.171 | 3.631E-01 | 1.171E-01 |
| SERPINE2   | -0.171 | 6.435E-01 | 5.661E-01 |
| ZNF296     | -0.171 | 4.131E-01 | 6.110E-01 |
| PA2G4      | -0.171 | 5.672E-02 | 6.802E-01 |
| METTL17    | -0.171 | 4.300E-02 | 7.553E-01 |
| KCNJ9      | -0.171 | 6.680E-01 | 1.006E-01 |
| MIR944     | -0.171 | NA        | 1.342E-01 |
| OR4N2      | -0.171 | NA        | 6.039E-01 |

|            |        |           |           |
|------------|--------|-----------|-----------|
| OTUD6A     | -0.171 | NA        | 1.108E-01 |
| TRIM27     | -0.171 | 2.814E-02 | 3.989E-01 |
| LRPAP1     | -0.171 | 1.219E-01 | 2.181E-02 |
| COQ10A     | -0.171 | 1.585E-01 | 3.033E-02 |
| TRAF3      | -0.171 | 1.012E-01 | 4.677E-01 |
| SLX1A      | -0.171 | 6.392E-01 | 2.454E-02 |
| RPS19      | -0.171 | 1.913E-01 | 2.376E-01 |
| MIR186     | -0.171 | 5.896E-01 | 6.297E-02 |
| FAM49B     | -0.171 | 6.424E-02 | 5.294E-02 |
| FAM163A    | -0.171 | 6.314E-01 | 1.220E-02 |
| DES11      | -0.171 | 2.998E-02 | 5.357E-01 |
| NOA1       | -0.171 | 1.324E-02 | 6.064E-01 |
| MRPS30     | -0.171 | 3.638E-02 | 3.056E-01 |
| IFT140     | -0.171 | 3.500E-01 | 1.919E-01 |
| TRIM52     | -0.172 | 1.192E-01 | 7.406E-02 |
| EGR3       | -0.172 | 5.826E-01 | 3.823E-01 |
| MIR4516    | -0.172 | NA        | 5.877E-02 |
| FAM46A     | -0.172 | 2.654E-01 | 3.345E-01 |
| FAM170B    | -0.172 | 7.910E-01 | 6.988E-02 |
| WDR17      | -0.172 | 7.352E-01 | 2.462E-01 |
| VASP       | -0.172 | 1.042E-01 | 2.192E-01 |
| BTBD2      | -0.172 | 3.021E-02 | 2.252E-01 |
| ATP23      | -0.172 | 1.224E-01 | 3.777E-01 |
| SIX4       | -0.172 | 3.075E-01 | 3.733E-01 |
| DFFB       | -0.172 | 5.366E-02 | 3.689E-01 |
| SLC9A9     | -0.172 | 4.430E-01 | 4.487E-01 |
| TRPT1      | -0.172 | 1.592E-01 | 6.855E-01 |
| IGFALS     | -0.172 | 6.045E-01 | 1.527E-02 |
| PPP1R1C    | -0.172 | 5.441E-01 | 4.268E-01 |
| DIS3L2     | -0.172 | 2.596E-02 | 1.076E-01 |
| SKAP1      | -0.172 | 5.191E-01 | 2.691E-02 |
| PHYKPL     | -0.172 | 9.219E-02 | 5.116E-01 |
| RNF126     | -0.172 | 7.551E-02 | 7.689E-01 |
| RAPGEF6    | -0.172 | 8.120E-03 | 4.435E-01 |
| CBR1       | -0.173 | 3.524E-01 | 1.100E-01 |
| MIR6893    | -0.173 | NA        | 3.948E-02 |
| CYC1       | -0.173 | 8.826E-02 | 3.119E-01 |
| CYB5R2     | -0.173 | 3.430E-01 | 1.248E-01 |
| CEP170B    | -0.173 | 1.214E-01 | 8.327E-01 |
| TNFAIP8    | -0.173 | 1.764E-01 | 3.723E-01 |
| WDR36      | -0.173 | 5.292E-02 | 3.801E-02 |
| CKAP2      | -0.173 | 1.817E-01 | 1.071E-02 |
| ZNF334     | -0.173 | 6.626E-01 | 5.407E-01 |
| ALDH2      | -0.173 | 5.470E-01 | 4.975E-02 |
| PUS7L      | -0.173 | 4.068E-02 | 1.241E-02 |
| RPS10      | -0.173 | 1.368E-01 | 3.116E-01 |
| AL021546.1 | -0.173 | 6.752E-01 | 4.253E-01 |
| WTAP       | -0.173 | 3.181E-03 | 8.896E-01 |
| SENP7      | -0.173 | 1.118E-01 | 8.897E-01 |
| KCTD21     | -0.173 | 8.573E-02 | 8.938E-01 |

|            |        |           |           |
|------------|--------|-----------|-----------|
| KDM4D      | -0.173 | 1.621E-01 | 9.225E-01 |
| OAF        | -0.173 | 2.252E-01 | 9.448E-01 |
| PLCB2      | -0.173 | 4.709E-01 | 1.685E-02 |
| GSC        | -0.173 | 7.162E-01 | 4.729E-01 |
| AP5M1      | -0.173 | 2.515E-02 | 1.336E-01 |
| 43891.000  | -0.174 | 3.770E-01 | 4.826E-02 |
| RPL13A     | -0.174 | 1.254E-01 | 5.958E-01 |
| KANTR      | -0.174 | 4.855E-01 | 8.470E-02 |
| C17orf75   | -0.174 | 1.149E-01 | 1.131E-02 |
| GGA1       | -0.174 | 5.800E-02 | 5.831E-02 |
| BHMG1      | -0.174 | 6.207E-01 | 4.415E-01 |
| MED7       | -0.174 | 1.190E-02 | 1.630E-01 |
| EIF3E      | -0.174 | 7.355E-02 | 3.902E-01 |
| POC5       | -0.174 | 2.583E-02 | 3.418E-02 |
| SPP2       | -0.174 | 8.627E-01 | 4.651E-01 |
| MZT2A      | -0.174 | 2.154E-01 | 1.538E-01 |
| PLEKHH3    | -0.174 | 2.091E-01 | 2.837E-02 |
| MIR4804    | -0.174 | NA        | 1.842E-01 |
| SHISA6     | -0.174 | 7.285E-01 | 2.814E-01 |
| S100A6     | -0.174 | 4.622E-01 | 2.147E-02 |
| NUDT13     | -0.174 | 2.186E-01 | 2.524E-01 |
| BAG1       | -0.174 | 2.504E-01 | 3.163E-01 |
| RAX        | -0.174 | 8.282E-01 | 2.618E-01 |
| MIR5579    | -0.174 | NA        | 3.258E-01 |
| NUP37      | -0.174 | 3.256E-02 | 9.329E-02 |
| FRAS1      | -0.174 | 6.257E-01 | 2.218E-01 |
| NPAS2      | -0.174 | 4.145E-01 | 4.035E-01 |
| MAPK6      | -0.174 | 2.095E-01 | 4.125E-02 |
| MTRF1L     | -0.174 | 9.912E-03 | 9.589E-03 |
| MROH1      | -0.174 | 7.007E-02 | 5.417E-01 |
| TNFRSF25   | -0.174 | 2.629E-01 | 3.103E-01 |
| OPRK1      | -0.175 | 8.188E-01 | 1.023E-02 |
| IFT43      | -0.175 | 5.273E-02 | 3.964E-01 |
| TTL12      | -0.175 | 1.138E-01 | 2.549E-01 |
| EIF4B      | -0.175 | 3.724E-02 | 6.270E-02 |
| INTS13     | -0.175 | 1.132E-01 | 1.800E-01 |
| RUNX1      | -0.175 | 1.057E-01 | 5.654E-01 |
| NUGGC      | -0.175 | 6.222E-01 | 6.865E-01 |
| ACAD10     | -0.175 | 6.404E-02 | 6.613E-02 |
| SNX22      | -0.175 | 3.201E-01 | 5.373E-01 |
| AC138811.2 | -0.175 | 4.769E-01 | 2.769E-01 |
| MAPKAPK5   | -0.175 | 1.670E-02 | 1.066E-01 |
| GJB5       | -0.175 | 5.831E-01 | 6.002E-01 |
| INS        | -0.175 | 8.403E-01 | 3.172E-01 |
| AC011005.1 | -0.175 | 3.938E-01 | 1.815E-01 |
| CTAGE1     | -0.175 | 7.936E-01 | 5.774E-01 |
| RAD52      | -0.175 | 1.120E-01 | 6.268E-01 |
| ABHD17C    | -0.175 | 2.573E-01 | 4.814E-01 |
| HOXC9      | -0.175 | 6.887E-01 | 6.977E-01 |
| MIR520G    | -0.175 | NA        | 1.779E-01 |

|            |        |           |           |
|------------|--------|-----------|-----------|
| OR4A16     | -0.175 | NA        | 6.373E-03 |
| EIF5AL1    | -0.175 | 5.776E-01 | 2.160E-01 |
| PRMT7      | -0.175 | 1.090E-01 | 4.604E-02 |
| AP000781.2 | -0.175 | 5.606E-01 | 1.188E-01 |
| NCR1       | -0.175 | 6.266E-01 | 3.062E-01 |
| PSTK       | -0.176 | 7.090E-02 | 2.944E-01 |
| ADARB2     | -0.176 | 6.642E-01 | 4.553E-01 |
| HCLS1      | -0.176 | 5.210E-01 | 9.069E-02 |
| ZNF286A    | -0.176 | 1.316E-01 | 6.563E-03 |
| ULBP3      | -0.176 | 4.185E-01 | 8.158E-01 |
| C12orf42   | -0.176 | 6.141E-01 | 9.177E-01 |
| TFAP4      | -0.176 | 7.950E-02 | 1.862E-01 |
| CXCR4      | -0.176 | 4.774E-01 | 6.828E-01 |
| ZNF100     | -0.176 | 2.058E-01 | 3.199E-02 |
| THOC3      | -0.176 | 1.054E-01 | 7.156E-02 |
| ENTPD4     | -0.176 | 9.416E-02 | 9.658E-01 |
| NUDT18     | -0.176 | 2.453E-01 | 9.658E-01 |
| AC010547.5 | -0.176 | 6.482E-01 | 3.210E-01 |
| IL16       | -0.176 | 5.195E-01 | 7.156E-01 |
| ZNF33B     | -0.176 | 1.169E-01 | 2.794E-01 |
| GAPDH      | -0.176 | 1.411E-01 | 1.778E-01 |
| AGAP4      | -0.176 | 2.027E-01 | 3.051E-01 |
| QTRT1      | -0.176 | 1.595E-01 | 4.263E-02 |
| DENND1C    | -0.176 | 1.790E-01 | 2.833E-01 |
| TLDC1      | -0.177 | 2.058E-01 | 1.759E-01 |
| IVD        | -0.177 | 9.781E-02 | 4.158E-01 |
| SLC25A36   | -0.177 | 6.314E-02 | 3.355E-01 |
| MIA        | -0.177 | 7.244E-01 | 2.302E-01 |
| STK11      | -0.177 | 3.714E-02 | 1.952E-01 |
| AL049697.1 | -0.177 | 3.996E-01 | 2.594E-01 |
| CCDC58     | -0.177 | 4.428E-02 | 1.014E-01 |
| LIPF       | -0.177 | 9.060E-01 | 4.428E-01 |
| C20orf96   | -0.177 | 2.676E-01 | 3.794E-02 |
| HSFY1      | -0.177 | NA        | 1.890E-01 |
| EYS        | -0.177 | 3.977E-01 | 1.766E-02 |
| MCC        | -0.177 | 3.939E-01 | 1.366E-02 |
| ADH5       | -0.177 | 1.091E-01 | 2.612E-01 |
| TRIM59     | -0.177 | 1.280E-01 | 6.491E-02 |
| LCP1       | -0.177 | 4.975E-01 | 2.842E-01 |
| RPUSD2     | -0.177 | 1.822E-02 | 2.755E-02 |
| ARPC3      | -0.177 | 3.843E-02 | 2.222E-01 |
| MTRNR2L6   | -0.177 | 6.190E-01 | 3.748E-01 |
| PADI1      | -0.177 | 7.084E-01 | 2.657E-01 |
| SMUG1      | -0.178 | 6.761E-02 | 5.121E-01 |
| ATP5G3     | -0.178 | 4.257E-02 | 3.380E-02 |
| NACC1      | -0.178 | 1.911E-02 | 3.874E-02 |
| C19orf24   | -0.178 | 1.901E-01 | 5.290E-01 |
| SMN2       | -0.178 | 4.966E-01 | 1.014E-01 |
| GPER1      | -0.178 | 4.735E-01 | 1.250E-02 |
| MOV10      | -0.178 | 5.961E-02 | 4.604E-01 |

|           |        |           |           |
|-----------|--------|-----------|-----------|
| NOTCH4    | -0.178 | 2.684E-01 | 1.997E-02 |
| MTMR7     | -0.178 | 2.405E-01 | 2.006E-02 |
| LSM7      | -0.178 | 1.561E-01 | 4.581E-02 |
| C17orf100 | -0.178 | 1.660E-01 | 3.928E-01 |
| SMIM8     | -0.178 | 5.345E-02 | 5.923E-01 |
| RPLP0     | -0.178 | 9.631E-02 | 1.358E-01 |
| KRTAP22-2 | -0.178 | NA        | 1.724E-01 |
| ZNF846    | -0.178 | 2.534E-01 | 3.004E-01 |
| GRK3      | -0.178 | 2.930E-01 | 3.304E-01 |
| DDX51     | -0.178 | 4.917E-02 | 5.816E-01 |
| KLF1      | -0.178 | 5.749E-01 | 5.774E-03 |
| EDN2      | -0.178 | 6.915E-01 | 3.832E-01 |
| TRIM21    | -0.178 | 2.094E-01 | 6.656E-01 |
| HSPA4     | -0.178 | 8.059E-03 | 7.490E-01 |
| BTBD11    | -0.179 | 5.521E-01 | 1.914E-01 |
| RPH3AL    | -0.179 | 3.883E-01 | 3.192E-01 |
| RNF151    | -0.179 | 5.902E-01 | 6.681E-01 |
| KLHL6     | -0.179 | 5.251E-01 | 6.545E-01 |
| DDHD1     | -0.179 | 1.831E-01 | 2.120E-01 |
| TBXAS1    | -0.179 | 5.218E-01 | 2.160E-03 |
| AQP8      | -0.179 | 6.259E-01 | 5.281E-01 |
| NDRG4     | -0.179 | 5.271E-01 | 3.831E-01 |
| NSA2      | -0.179 | 3.922E-02 | 2.496E-01 |
| C21orf91  | -0.179 | 1.665E-01 | 3.652E-01 |
| TRAPPC1   | -0.179 | 6.254E-02 | 9.129E-02 |
| ZNF414    | -0.179 | 8.443E-02 | 4.308E-01 |
| KLHL14    | -0.179 | 6.655E-01 | 2.865E-01 |
| NHLH2     | -0.179 | 7.528E-01 | 4.260E-01 |
| ADHFE1    | -0.179 | 5.547E-01 | 3.282E-02 |
| ATG4D     | -0.179 | 7.780E-02 | 4.024E-02 |
| ZNF660    | -0.179 | 4.778E-01 | 6.771E-02 |
| TYSND1    | -0.179 | 1.118E-01 | 8.656E-02 |
| UQCRH     | -0.179 | 8.361E-02 | 4.138E-01 |
| DDO       | -0.179 | 5.468E-01 | 6.043E-02 |
| DCAF16    | -0.179 | 4.151E-02 | 2.710E-01 |
| CHMP4A    | -0.180 | 8.675E-02 | 1.478E-01 |
| RPL26     | -0.180 | 1.530E-01 | 1.736E-01 |
| CETP      | -0.180 | 4.366E-01 | 6.187E-03 |
| CCNG2     | -0.180 | 2.913E-01 | 3.795E-01 |
| SHC3      | -0.180 | 5.497E-01 | 8.009E-02 |
| TOGARAM2  | -0.180 | 5.316E-01 | 2.999E-01 |
| CES1      | -0.180 | 7.203E-01 | 2.820E-01 |
| MZT2B     | -0.180 | 1.810E-01 | 1.024E-01 |
| MRPL18    | -0.180 | 6.176E-03 | 8.948E-02 |
| RPS3A     | -0.180 | 1.103E-01 | 2.645E-01 |
| USP45     | -0.180 | 2.178E-02 | 5.294E-01 |
| NOXO1     | -0.180 | NA        | 5.120E-01 |
| DCDC2     | -0.180 | 7.351E-01 | 2.888E-01 |
| MRPL39    | -0.180 | 3.140E-02 | 3.046E-01 |
| SNRNP35   | -0.180 | 5.910E-02 | 3.678E-01 |

|            |        |           |           |
|------------|--------|-----------|-----------|
| TTC39C     | -0.180 | 1.502E-01 | 3.484E-01 |
| ZNF506     | -0.180 | 2.027E-01 | 5.805E-01 |
| HSPE1      | -0.180 | 5.003E-02 | 7.815E-01 |
| ZNF397     | -0.180 | 9.912E-02 | 7.847E-02 |
| CTBP1      | -0.180 | 2.451E-02 | 4.680E-02 |
| RGS8       | -0.180 | 5.926E-01 | 8.087E-01 |
| GBP4       | -0.180 | 5.218E-01 | 8.839E-01 |
| PCDHB13    | -0.180 | 3.973E-01 | 4.155E-02 |
| CD28       | -0.180 | 5.341E-01 | 5.544E-02 |
| HOXD12     | -0.180 | 7.221E-01 | 5.689E-01 |
| NHS        | -0.180 | 3.742E-01 | 2.210E-01 |
| TMEM63A    | -0.180 | 2.169E-01 | 1.015E-01 |
| TMEM106A   | -0.180 | 4.622E-01 | 3.758E-01 |
| IMPG1      | -0.180 | 4.681E-01 | 6.162E-02 |
| TRMT13     | -0.181 | 3.638E-02 | 1.141E-01 |
| RBM5       | -0.181 | 7.483E-02 | 2.708E-01 |
| HNRNPA0    | -0.181 | 3.653E-03 | 8.183E-01 |
| PRKAB1     | -0.181 | 3.647E-02 | 7.511E-03 |
| OR2A12     | -0.181 | NA        | 9.188E-01 |
| CCDC42     | -0.181 | 6.027E-01 | 1.269E-01 |
| JRK        | -0.181 | 1.854E-01 | 1.185E-01 |
| CCNG1      | -0.181 | 1.253E-01 | 1.011E-02 |
| MIR1284    | -0.181 | NA        | 2.527E-01 |
| OR2G2      | -0.181 | NA        | 1.117E-01 |
| MIR4417    | -0.181 | NA        | 2.369E-02 |
| SLC25A28   | -0.181 | 8.486E-02 | 2.364E-01 |
| SMIM17     | -0.181 | 5.720E-01 | 3.907E-01 |
| MSANTD2    | -0.181 | 1.506E-01 | 4.546E-01 |
| PNLIP      | -0.181 | NA        | 2.082E-02 |
| TMEM259    | -0.181 | 3.657E-02 | 9.078E-02 |
| CCDC88A    | -0.181 | 3.533E-01 | 3.024E-03 |
| RPP21      | -0.181 | 7.637E-02 | 1.644E-01 |
| TGFB1      | -0.182 | 3.187E-01 | 5.222E-01 |
| TRIM38     | -0.182 | 5.883E-02 | 3.423E-01 |
| ZNF792     | -0.182 | 2.393E-01 | 9.538E-03 |
| C12orf43   | -0.182 | 6.024E-03 | 3.914E-02 |
| E2F5       | -0.182 | 2.367E-01 | 1.398E-02 |
| TMSB15A    | -0.182 | 6.535E-01 | 6.353E-03 |
| PPIL2      | -0.182 | 2.673E-02 | 4.330E-01 |
| MIR4748    | -0.182 | NA        | 1.186E-01 |
| ALPK1      | -0.182 | 9.666E-02 | 1.445E-01 |
| DZIP1      | -0.182 | 4.276E-01 | 2.662E-02 |
| CTNNA3     | -0.182 | 6.848E-01 | 3.243E-01 |
| FAM181B    | -0.182 | 6.336E-01 | 7.729E-01 |
| RNF224     | -0.182 | 5.436E-01 | 7.800E-02 |
| FLYWCH1    | -0.182 | 8.636E-02 | 1.960E-02 |
| CIDEB      | -0.182 | 5.012E-01 | 8.469E-01 |
| AC018523.2 | -0.182 | 7.294E-01 | 7.369E-02 |
| RSL1D1     | -0.182 | 3.130E-02 | 1.579E-01 |
| FHIT       | -0.182 | 4.027E-01 | 1.867E-02 |

|            |        |           |           |
|------------|--------|-----------|-----------|
| GATA3      | -0.183 | 5.629E-01 | 1.810E-01 |
| FGF9       | -0.183 | 6.533E-01 | 6.934E-02 |
| MRPL1      | -0.183 | 2.082E-02 | 5.070E-01 |
| ZBTB24     | -0.183 | 2.235E-03 | 3.047E-01 |
| AIM2       | -0.183 | 6.748E-01 | 9.140E-02 |
| IFI27L2    | -0.183 | 4.168E-01 | 3.983E-01 |
| ADGRB3     | -0.183 | 6.953E-01 | 8.347E-01 |
| RSRP1      | -0.183 | 2.120E-01 | 2.087E-01 |
| ARL10      | -0.183 | 3.815E-01 | 7.467E-03 |
| PRELID2    | -0.183 | 1.586E-01 | 4.533E-01 |
| IDUA       | -0.183 | 3.356E-01 | 1.592E-01 |
| EPPK1      | -0.183 | 4.854E-01 | 4.740E-02 |
| LATS1      | -0.183 | 3.375E-02 | 3.782E-01 |
| PEBP4      | -0.184 | 6.081E-01 | 5.091E-02 |
| SRSF12     | -0.184 | 5.926E-01 | 1.341E-01 |
| HELZ2      | -0.184 | 2.580E-01 | 3.458E-01 |
| RPL38      | -0.184 | 1.378E-01 | 5.729E-01 |
| MIR4682    | -0.184 | NA        | 3.217E-01 |
| PCDHGA5    | -0.184 | 3.736E-01 | 3.926E-01 |
| PREX1      | -0.184 | 2.931E-01 | 4.346E-01 |
| KLHDC4     | -0.184 | 7.338E-02 | 5.727E-01 |
| MIR3155A   | -0.184 | NA        | 4.802E-02 |
| SLC44A3    | -0.184 | 3.863E-01 | 5.400E-01 |
| ZC2HC1B    | -0.184 | NA        | 3.139E-01 |
| TSPY8      | -0.184 | NA        | 2.742E-01 |
| SPANXA1    | -0.184 | NA        | 3.776E-02 |
| OC90       | -0.184 | NA        | 2.934E-02 |
| ORAOV1     | -0.184 | 1.582E-01 | 2.040E-01 |
| GALR1      | -0.184 | 7.539E-01 | 3.137E-01 |
| RASSF9     | -0.184 | 6.599E-01 | 9.363E-01 |
| ITGA4      | -0.184 | 4.854E-01 | 1.812E-01 |
| DHX33      | -0.184 | 4.299E-02 | 6.666E-02 |
| NME8       | -0.184 | 6.004E-01 | 4.897E-01 |
| NAA16      | -0.184 | 6.162E-02 | 2.047E-02 |
| MIR302D    | -0.184 | NA        | 1.309E-01 |
| IFI35      | -0.184 | 3.660E-01 | 4.021E-02 |
| CNBD1      | -0.184 | 8.317E-01 | 4.084E-01 |
| ERICH6B    | -0.184 | 3.918E-01 | 1.170E-01 |
| MTG1       | -0.184 | 1.397E-01 | 8.054E-01 |
| FAM83G     | -0.184 | 3.227E-01 | 1.926E-01 |
| BOP1       | -0.185 | 1.601E-01 | 5.150E-01 |
| SLC25A22   | -0.185 | 8.164E-02 | 2.749E-01 |
| BMP7       | -0.185 | 7.012E-01 | 3.318E-02 |
| DMXL2      | -0.185 | 9.038E-02 | 1.498E-01 |
| CUL9       | -0.185 | 4.917E-02 | 5.971E-01 |
| ANKZF1     | -0.185 | 4.469E-02 | 6.124E-01 |
| GADD45GIP1 | -0.185 | 1.562E-01 | 5.497E-01 |
| CDK7       | -0.185 | 4.155E-02 | 5.222E-03 |
| ZNF503     | -0.185 | 2.516E-01 | 7.657E-01 |
| MS4A4E     | -0.185 | 5.330E-01 | 2.426E-01 |

|            |        |           |           |
|------------|--------|-----------|-----------|
| NPM1       | -0.185 | 5.170E-02 | 2.592E-01 |
| PRSS38     | -0.185 | NA        | 8.289E-01 |
| UMOD       | -0.185 | NA        | 5.242E-02 |
| KDM6B      | -0.185 | 1.353E-01 | 8.640E-01 |
| CLEC4E     | -0.185 | 6.211E-01 | 2.494E-01 |
| SPATA24    | -0.185 | 7.783E-02 | 3.674E-01 |
| PCDHGA3    | -0.185 | 5.620E-01 | 3.749E-01 |
| NEU3       | -0.185 | 7.202E-02 | 1.101E-02 |
| NOB1       | -0.185 | 2.910E-02 | 4.457E-03 |
| RNF145     | -0.185 | 2.419E-01 | 2.458E-01 |
| MTERF2     | -0.186 | 8.556E-02 | 5.986E-02 |
| TXNRD2     | -0.186 | 3.029E-01 | 2.093E-01 |
| IGF2BP3    | -0.186 | 7.152E-01 | 1.008E-03 |
| ZSCAN30    | -0.186 | 7.296E-02 | 2.106E-01 |
| CLEC10A    | -0.186 | 5.954E-01 | 3.644E-01 |
| NUDT15     | -0.186 | 3.551E-02 | 6.205E-02 |
| MIR548AA2  | -0.186 | 6.432E-01 | 5.281E-02 |
| KCTD11     | -0.186 | 2.635E-01 | 6.431E-01 |
| C12orf49   | -0.186 | 3.558E-02 | 7.125E-01 |
| MAP3K7CL   | -0.186 | 2.595E-01 | 1.204E-02 |
| CDKL3      | -0.186 | 6.853E-02 | 7.240E-03 |
| SCN2B      | -0.186 | 6.900E-01 | 6.209E-01 |
| LOXHD1     | -0.187 | 5.246E-01 | 3.949E-01 |
| ATP5L2     | -0.187 | 5.449E-01 | 8.944E-01 |
| MIR6762    | -0.187 | 7.538E-01 | 1.643E-01 |
| MIR548I2   | -0.187 | NA        | 1.303E-01 |
| MIR6796    | -0.187 | NA        | 3.716E-01 |
| GIN1       | -0.187 | 4.964E-03 | 6.873E-02 |
| DEPDC4     | -0.187 | 7.338E-02 | 4.942E-02 |
| KIRREL2    | -0.187 | 6.748E-01 | 4.834E-01 |
| PPP1R16A   | -0.187 | 1.513E-01 | 7.712E-02 |
| BLMH       | -0.187 | 8.925E-02 | 1.895E-01 |
| ATP13A1    | -0.187 | 1.119E-02 | 9.469E-02 |
| CDIP1      | -0.187 | 4.524E-01 | 8.949E-01 |
| ECHDC1     | -0.187 | 3.990E-02 | 9.631E-01 |
| CHD5       | -0.187 | 5.584E-01 | 1.590E-01 |
| MIR302C    | -0.187 | NA        | 1.538E-01 |
| TRAFD1     | -0.187 | 5.695E-02 | 2.571E-01 |
| CASP10     | -0.187 | 2.346E-01 | 7.092E-01 |
| AC068775.1 | -0.187 | 4.517E-01 | 9.272E-02 |
| MED23      | -0.187 | 2.349E-02 | 6.522E-01 |
| SNX14      | -0.187 | 2.117E-02 | 9.588E-02 |
| ZNF581     | -0.187 | 7.785E-02 | 2.752E-02 |
| THRB       | -0.187 | 4.114E-01 | 2.273E-01 |
| TTL4       | -0.187 | 3.001E-02 | 6.176E-01 |
| ETNK1      | -0.187 | 3.620E-02 | 3.093E-02 |
| GIMAP2     | -0.188 | 3.228E-01 | 3.702E-01 |
| TRIM54     | -0.188 | 6.873E-01 | 4.394E-02 |
| MZF1       | -0.188 | 1.838E-01 | 1.373E-01 |
| BTN3A2     | -0.188 | 2.605E-01 | 5.061E-01 |



|             |        |           |           |
|-------------|--------|-----------|-----------|
| PPDPF       | -0.188 | 1.994E-01 | 1.848E-01 |
| MRPL22      | -0.188 | 1.666E-02 | 2.905E-01 |
| GRAPL       | -0.188 | 6.258E-01 | 5.297E-02 |
| MIR7-3      | -0.188 | NA        | 1.581E-01 |
| MIR124-2    | -0.188 | NA        | 1.637E-02 |
| MIR541      | -0.188 | NA        | 7.520E-02 |
| MIR670      | -0.188 | NA        | 3.203E-01 |
| OR52H1      | -0.188 | NA        | 5.396E-01 |
| TSPYL1      | -0.188 | 1.613E-02 | 3.247E-01 |
| ASF1A       | -0.188 | 4.756E-02 | 2.115E-01 |
| AD000671.2  | -0.188 | 3.833E-01 | 3.945E-01 |
| MIGA2       | -0.188 | 1.160E-01 | 4.041E-01 |
| LY6E        | -0.188 | 4.595E-01 | 3.909E-01 |
| SLC4A11     | -0.188 | 4.227E-01 | 9.710E-03 |
| MND1        | -0.188 | 2.195E-01 | 1.767E-02 |
| ZNF431      | -0.188 | 1.629E-01 | 1.519E-01 |
| MIR3682     | -0.188 | 3.113E-01 | 2.206E-01 |
| RNF215      | -0.189 | 6.515E-02 | 4.375E-01 |
| MYBPC2      | -0.189 | 6.321E-01 | 2.489E-03 |
| MECOM       | -0.189 | 4.276E-01 | 4.224E-01 |
| GPR119      | -0.189 | NA        | 2.256E-01 |
| THAP4       | -0.189 | 4.299E-02 | 2.247E-01 |
| NT5C        | -0.189 | 1.305E-01 | 5.239E-01 |
| ELOB        | -0.189 | 1.149E-01 | 1.869E-01 |
| AREG        | -0.189 | 6.647E-01 | 3.553E-02 |
| ZNF577      | -0.189 | 3.535E-01 | 3.330E-02 |
| OR56B4      | -0.189 | 6.817E-01 | 3.069E-01 |
| PLEKHG5     | -0.189 | 2.252E-01 | 2.366E-01 |
| PAK6        | -0.189 | 3.511E-01 | 1.339E-02 |
| VPS37B      | -0.189 | 6.259E-02 | 1.320E-02 |
| CHTF18      | -0.189 | 1.656E-01 | 1.306E-01 |
| AL360181.3  | -0.189 | 4.778E-01 | 4.165E-03 |
| CYP27C1     | -0.189 | 6.237E-01 | 1.762E-01 |
| TBX3        | -0.189 | 5.634E-01 | 5.823E-02 |
| MICAL1      | -0.189 | 2.023E-01 | 3.541E-01 |
| SEMA4D      | -0.189 | 1.146E-01 | 6.319E-01 |
| DUS3L       | -0.189 | 3.478E-02 | 1.608E-01 |
| HLA-A       | -0.189 | 4.006E-01 | 7.586E-02 |
| CFAP69      | -0.189 | 3.061E-01 | 9.112E-02 |
| TPGT-TNNI3F | -0.189 | 5.316E-01 | 1.503E-01 |
| CNTNAP2     | -0.189 | 7.738E-01 | 4.466E-01 |
| NDUF8       | -0.189 | 1.568E-01 | 5.170E-01 |
| RPL7        | -0.190 | 8.201E-02 | 3.568E-01 |
| MIR1268A    | -0.190 | NA        | 2.825E-02 |
| ANKUB1      | -0.190 | 6.829E-01 | 2.770E-01 |
| MIR874      | -0.190 | NA        | 1.860E-01 |
| ALDH3A1     | -0.190 | 7.075E-01 | 1.163E-01 |
| PDE6C       | -0.190 | 2.810E-01 | 4.452E-03 |
| CCND2       | -0.190 | 5.188E-01 | 4.441E-02 |
| AANAT       | -0.190 | 4.522E-01 | 3.840E-01 |

|          |        |           |           |
|----------|--------|-----------|-----------|
| YBX1     | -0.190 | 6.050E-02 | 3.522E-01 |
| ZBTB40   | -0.190 | 3.251E-02 | 1.369E-01 |
| FAM53C   | -0.190 | 8.710E-03 | 1.434E-02 |
| D2HGDH   | -0.190 | 1.872E-01 | 5.335E-01 |
| STAMBPL1 | -0.190 | 2.463E-01 | 2.538E-02 |
| DNMBP    | -0.190 | 2.053E-01 | 7.007E-02 |
| GREB1L   | -0.190 | 6.794E-01 | 2.022E-03 |
| GPAT2    | -0.190 | 6.743E-01 | 1.164E-01 |
| KRT86    | -0.190 | 5.302E-01 | 4.282E-01 |
| ZNF142   | -0.190 | 1.042E-02 | 7.898E-01 |
| CD74     | -0.191 | 4.920E-01 | 4.251E-01 |
| ACER3    | -0.191 | 6.857E-02 | 3.673E-01 |
| MIR7152  | -0.191 | 7.848E-01 | 6.695E-03 |
| TDG      | -0.191 | 4.114E-02 | 1.435E-03 |
| ZNF705D  | -0.191 | NA        | 5.821E-01 |
| CSHL1    | -0.191 | NA        | 3.865E-01 |
| MIR2276  | -0.191 | NA        | 9.009E-03 |
| MIR515-2 | -0.191 | NA        | 8.370E-02 |
| OR5H14   | -0.191 | NA        | 2.019E-01 |
| TMEM233  | -0.191 | 4.425E-01 | 8.662E-02 |
| FXVD3    | -0.191 | 4.591E-01 | 3.301E-02 |
| CDK6     | -0.191 | 5.093E-01 | 9.101E-02 |
| MIR6514  | -0.191 | 6.157E-01 | 6.322E-01 |
| MIR421   | -0.191 | 6.488E-01 | 6.187E-01 |
| IQSEC3   | -0.191 | 5.754E-01 | 1.789E-02 |
| ZNF780B  | -0.191 | 1.555E-01 | 2.485E-01 |
| AQP6     | -0.191 | 6.471E-01 | 2.807E-01 |
| ZNHIT2   | -0.191 | 1.310E-01 | 8.983E-02 |
| TXN      | -0.191 | 1.954E-01 | 2.737E-01 |
| GARNL3   | -0.191 | 3.509E-01 | 2.980E-01 |
| POTEF    | -0.191 | 5.749E-01 | 4.682E-01 |
| EXOSC4   | -0.191 | 1.059E-01 | 1.215E-02 |
| IPO4     | -0.192 | 6.427E-02 | 4.796E-01 |
| PPHLN1   | -0.192 | 2.607E-03 | 2.423E-01 |
| NDUF4F4  | -0.192 | 4.004E-02 | 7.878E-01 |
| ZNF658   | -0.192 | 1.738E-01 | 3.911E-02 |
| WDR75    | -0.192 | 1.337E-02 | 2.794E-02 |
| ANKDD1B  | -0.192 | 4.622E-01 | 4.025E-03 |
| MARK1    | -0.192 | 3.410E-01 | 1.746E-01 |
| ARID3B   | -0.192 | 1.680E-01 | 4.578E-01 |
| BAZ2B    | -0.192 | 6.285E-02 | 3.328E-01 |
| ZNF493   | -0.192 | 3.017E-01 | 6.070E-02 |
| HIST1H1B | -0.192 | 5.737E-01 | 3.713E-02 |
| POC1B    | -0.192 | 2.953E-02 | 4.710E-01 |
| GPR65    | -0.192 | 4.891E-01 | 3.226E-02 |
| CLEC4C   | -0.192 | 7.057E-01 | 8.922E-01 |
| IRAK1BP1 | -0.192 | 1.325E-01 | 3.322E-01 |
| NELFA    | -0.192 | 4.986E-02 | 7.599E-02 |
| COX6A1   | -0.192 | 5.330E-02 | 4.382E-02 |
| TRA2A    | -0.192 | 1.461E-02 | 6.098E-02 |

|            |        |           |           |
|------------|--------|-----------|-----------|
| AC011511.4 | -0.192 | 4.797E-01 | 1.988E-01 |
| MIR367     | -0.193 | NA        | 2.877E-03 |
| NDUFC1     | -0.193 | 3.766E-02 | 3.611E-01 |
| ACTL6B     | -0.193 | 6.374E-01 | 4.147E-03 |
| C4orf33    | -0.193 | 7.326E-02 | 3.236E-01 |
| RGS21      | -0.193 | 8.204E-01 | 1.108E-01 |
| MIR3651    | -0.193 | NA        | 3.060E-01 |
| C7orf72    | -0.193 | NA        | 1.003E-02 |
| ZNF513     | -0.193 | 6.772E-02 | 1.745E-01 |
| ACADVL     | -0.193 | 1.061E-01 | 4.470E-01 |
| ADAM7      | -0.193 | NA        | 4.028E-01 |
| CARD6      | -0.193 | 2.565E-01 | 3.748E-02 |
| CSF3R      | -0.193 | 5.263E-01 | 2.272E-02 |
| HIP1R      | -0.193 | 1.314E-01 | 1.222E-02 |
| C17orf78   | -0.194 | 5.050E-01 | 4.957E-01 |
| TCP10      | -0.194 | NA        | 2.428E-02 |
| MTMR3      | -0.194 | 8.936E-02 | 3.575E-01 |
| MIDN       | -0.194 | 4.395E-02 | 3.472E-01 |
| MIR3611    | -0.194 | NA        | 3.533E-03 |
| KRTAP9-9   | -0.194 | NA        | 2.035E-01 |
| HNRNPH1    | -0.194 | 7.561E-03 | 1.234E-01 |
| MIR6750    | -0.194 | 7.387E-01 | 6.576E-02 |
| MIR3157    | -0.194 | NA        | 1.922E-02 |
| TMTC3      | -0.194 | 1.034E-01 | 1.751E-01 |
| OFD1       | -0.194 | 9.271E-02 | 5.252E-02 |
| TLL1       | -0.194 | 6.393E-01 | 5.507E-03 |
| ETS2       | -0.194 | 2.277E-01 | 3.112E-03 |
| AKIRIN2    | -0.194 | 8.473E-03 | 6.158E-01 |
| MPP6       | -0.194 | 3.856E-01 | 5.212E-01 |
| SCAF8      | -0.194 | 4.281E-03 | 5.060E-01 |
| TRMT10C    | -0.194 | 8.746E-03 | 9.082E-02 |
| SNURF      | -0.195 | 5.093E-01 | 1.499E-02 |
| MTMR10     | -0.195 | 2.851E-02 | 2.811E-01 |
| HIGD1B     | -0.195 | 3.384E-01 | 5.370E-01 |
| PPP6R2     | -0.195 | 6.863E-03 | 3.276E-01 |
| CCDC60     | -0.195 | 7.407E-01 | 3.075E-02 |
| RHCG       | -0.195 | 7.161E-01 | 2.478E-02 |
| BAZ1A      | -0.195 | 4.232E-02 | 8.610E-01 |
| CCBE1      | -0.195 | 6.681E-01 | 3.306E-01 |
| AP001931.1 | -0.195 | 5.492E-01 | 6.049E-02 |
| MRFAP1L1   | -0.195 | 2.014E-02 | 2.067E-01 |
| CLK4       | -0.195 | 6.924E-02 | 5.369E-02 |
| NAA25      | -0.195 | 3.536E-02 | 2.189E-01 |
| ACKR4      | -0.195 | 5.656E-01 | 9.560E-02 |
| PAGE3      | -0.195 | NA        | 1.601E-03 |
| DPF3       | -0.195 | 4.061E-01 | 5.374E-03 |
| TYMP       | -0.195 | 5.203E-01 | 5.733E-01 |
| SLC3A2     | -0.195 | 1.748E-01 | 5.201E-02 |
| UBAP1L     | -0.195 | 2.487E-01 | 3.227E-01 |
| IRF1       | -0.195 | 3.308E-01 | 3.640E-02 |

|           |        |           |           |
|-----------|--------|-----------|-----------|
| SPATA21   | -0.196 | 6.978E-01 | 1.293E-01 |
| PNN       | -0.196 | 9.682E-03 | 4.681E-01 |
| FAM71D    | -0.196 | 3.240E-01 | 1.297E-01 |
| RNF39     | -0.196 | 4.044E-01 | 5.950E-01 |
| TBC1D14   | -0.196 | 1.824E-01 | 3.760E-02 |
| MIR140    | -0.196 | 7.738E-01 | 5.383E-02 |
| PLIN4     | -0.196 | 5.597E-01 | 3.179E-01 |
| IMPG2     | -0.196 | 3.106E-01 | 4.422E-01 |
| RPL7A     | -0.196 | 6.761E-02 | 1.697E-01 |
| SBF1      | -0.196 | 5.280E-02 | 2.160E-01 |
| PAICS     | -0.196 | 5.387E-02 | 7.468E-02 |
| XAGE1A    | -0.196 | NA        | 9.548E-03 |
| CUX2      | -0.196 | 6.291E-01 | 1.552E-02 |
| MIR4499   | -0.196 | NA        | 5.159E-01 |
| PITX3     | -0.197 | 5.983E-01 | 5.433E-01 |
| MIR3913-1 | -0.197 | NA        | 1.243E-01 |
| LETM1     | -0.197 | 2.183E-02 | 9.460E-02 |
| AIG1      | -0.197 | 1.682E-01 | 5.711E-01 |
| AGRP      | -0.197 | 4.640E-01 | 6.276E-03 |
| CCAR2     | -0.197 | 1.582E-02 | 2.042E-01 |
| YJEFN3    | -0.197 | 4.331E-01 | 1.760E-03 |
| MIR187    | -0.197 | 7.902E-01 | 3.738E-01 |
| UCP3      | -0.197 | 2.641E-01 | 3.850E-01 |
| EPOR      | -0.197 | 3.293E-01 | 2.507E-01 |
| NDUFC2    | -0.197 | 9.556E-02 | 1.758E-02 |
| RPL17     | -0.197 | 4.632E-02 | 4.755E-03 |
| ERAP1     | -0.197 | 1.332E-01 | 3.443E-01 |
| TLR1      | -0.197 | 4.705E-01 | 3.369E-01 |
| VAV1      | -0.198 | 4.536E-01 | 1.882E-01 |
| HOXB1     | -0.198 | 6.798E-01 | 2.560E-01 |
| OR5V1     | -0.198 | NA        | 1.755E-02 |
| NCOA7     | -0.198 | 2.704E-01 | 5.143E-02 |
| MIR3660   | -0.198 | 8.680E-01 | 5.645E-01 |
| HPS4      | -0.198 | 3.362E-02 | 5.092E-01 |
| EEF2      | -0.198 | 2.319E-02 | 1.118E-02 |
| FAM183A   | -0.198 | 4.868E-01 | 1.759E-02 |
| SIGIRR    | -0.198 | 1.973E-01 | 2.111E-02 |
| CCDC36    | -0.198 | 3.171E-01 | 1.836E-01 |
| MIR25     | -0.198 | 3.403E-01 | 3.649E-01 |
| RFX5      | -0.199 | 4.979E-02 | 3.758E-01 |
| PCP2      | -0.199 | 5.217E-01 | 4.184E-01 |
| PPAT      | -0.199 | 6.528E-02 | 7.874E-01 |
| ZBTB7C    | -0.199 | 5.320E-01 | 1.791E-03 |
| QRICH2    | -0.199 | 3.147E-01 | 6.219E-02 |
| FFAR2     | -0.199 | 6.387E-01 | 7.615E-02 |
| NIPAL2    | -0.199 | 2.101E-01 | 1.378E-01 |
| HDC       | -0.199 | 5.568E-01 | 3.141E-03 |
| LDHAL6A   | -0.199 | 7.467E-01 | 1.049E-01 |
| TGS1      | -0.199 | 1.906E-02 | 1.656E-01 |
| IGFL3     | -0.199 | 8.035E-01 | 1.712E-03 |

|            |        |           |           |
|------------|--------|-----------|-----------|
| DST        | -0.199 | 3.078E-01 | 1.246E-02 |
| AC005726.2 | -0.199 | 2.965E-01 | 1.507E-01 |
| RRS1       | -0.199 | 5.883E-02 | 6.543E-01 |
| CIB3       | -0.199 | 6.321E-01 | 6.029E-01 |
| SLC5A12    | -0.199 | 5.867E-01 | 3.059E-02 |
| KLHL40     | -0.199 | NA        | 3.166E-01 |
| NKTR       | -0.199 | 1.655E-01 | 1.348E-01 |
| ZNF222     | -0.199 | 1.814E-01 | 4.576E-02 |
| GJB2       | -0.199 | 6.116E-01 | 1.317E-01 |
| LILRA1     | -0.199 | 5.068E-01 | 4.991E-01 |
| NFKBID     | -0.199 | 1.258E-01 | 5.140E-01 |
| EAF2       | -0.200 | 2.038E-01 | 6.113E-01 |
| AC025165.3 | -0.200 | 4.278E-01 | 9.543E-01 |
| GTF2IRD2B  | -0.200 | 1.768E-01 | 4.114E-01 |
| MIR425     | -0.200 | 7.910E-01 | 4.976E-01 |
| GIMAP8     | -0.200 | 3.172E-01 | 4.089E-01 |
| PPIL3      | -0.200 | 2.828E-02 | 4.022E-01 |
| SULT1A3    | -0.200 | 4.078E-01 | 1.690E-01 |
| RASA4B     | -0.200 | 5.746E-01 | 2.799E-01 |
| ITPRIPL1   | -0.200 | 4.763E-01 | 2.446E-01 |
| DEPDC1B    | -0.200 | 2.102E-01 | 5.223E-02 |
| GRIN2A     | -0.200 | 6.848E-01 | 1.854E-01 |
| KCNQ3      | -0.200 | 4.014E-01 | 3.709E-01 |
| C1orf159   | -0.200 | 1.091E-01 | 2.692E-01 |
| EML5       | -0.200 | 5.898E-01 | 2.858E-02 |
| MYBBP1A    | -0.200 | 2.915E-02 | 2.626E-01 |
| MANSC4     | -0.200 | 5.935E-01 | 3.307E-01 |
| FOXD4L5    | -0.201 | 7.106E-01 | 7.875E-01 |
| ABCB6      | -0.201 | 2.435E-01 | 6.186E-02 |
| KCNJ11     | -0.201 | 5.210E-01 | 2.179E-02 |
| CERK       | -0.201 | 2.919E-01 | 5.328E-01 |
| APOM       | -0.201 | 1.350E-01 | 8.544E-01 |
| PEMT       | -0.201 | 9.042E-02 | 9.458E-04 |
| DGCR8      | -0.201 | 5.121E-03 | 3.040E-02 |
| SRGAP3     | -0.201 | 3.918E-01 | 6.892E-02 |
| FAH        | -0.201 | 1.356E-01 | 3.353E-01 |
| DOPEY1     | -0.201 | 8.844E-02 | 2.437E-01 |
| CFH        | -0.201 | 4.289E-01 | 5.689E-01 |
| MIR4795    | -0.201 | 7.363E-01 | 2.858E-03 |
| UBE3D      | -0.201 | 3.372E-02 | 3.741E-01 |
| COX4I2     | -0.201 | 3.769E-01 | 3.906E-03 |
| KLHL13     | -0.201 | 5.344E-01 | 7.188E-02 |
| UQCR11     | -0.201 | 6.453E-02 | 3.774E-02 |
| RWDD3      | -0.201 | 1.446E-02 | 5.022E-03 |
| UQCR10     | -0.201 | 1.021E-01 | 4.396E-01 |
| MLPH       | -0.201 | 4.756E-01 | 4.838E-01 |
| SLC4A9     | -0.201 | 5.568E-01 | 8.046E-01 |
| FRG2C      | -0.201 | 7.540E-01 | 1.290E-02 |
| B3GALT1    | -0.201 | 6.507E-01 | 3.428E-02 |
| OTUB2      | -0.202 | 2.497E-01 | 7.848E-01 |

|            |        |           |           |
|------------|--------|-----------|-----------|
| DDX39B     | -0.202 | 8.695E-02 | 1.960E-01 |
| HDAC7      | -0.202 | 2.724E-02 | 3.529E-01 |
| ATP5G2     | -0.202 | 1.848E-02 | 6.064E-01 |
| RIN1       | -0.202 | 3.178E-01 | 1.115E-01 |
| NDUFAF1    | -0.202 | 9.538E-03 | 7.587E-03 |
| C11orf1    | -0.202 | 1.310E-01 | 3.771E-01 |
| FAR1       | -0.202 | 2.183E-02 | 2.908E-01 |
| PAQR6      | -0.202 | 3.783E-01 | 1.768E-01 |
| NCKAP1L    | -0.202 | 5.163E-01 | 2.476E-01 |
| TAS2R13    | -0.202 | 6.392E-01 | 1.148E-01 |
| ZNF814     | -0.202 | 1.940E-01 | 3.820E-01 |
| C22orf29   | -0.202 | 1.258E-01 | 1.603E-01 |
| C12orf57   | -0.202 | 1.195E-01 | 3.139E-02 |
| ROPN1      | -0.202 | 8.217E-01 | 5.493E-02 |
| LIMD2      | -0.202 | 2.864E-01 | 7.033E-01 |
| DPH7       | -0.202 | 4.745E-02 | 2.632E-01 |
| PGBD4      | -0.202 | 4.125E-02 | 4.840E-01 |
| MIR3176    | -0.202 | 4.732E-01 | 6.676E-01 |
| MDN1       | -0.202 | 3.147E-02 | 1.671E-02 |
| GPR143     | -0.202 | 5.208E-01 | 1.613E-02 |
| HSPE1-MOB4 | -0.202 | 3.884E-01 | 1.872E-01 |
| NIFK       | -0.202 | 5.134E-03 | 8.680E-03 |
| MIR6085    | -0.202 | NA        | 7.752E-01 |
| MIR587     | -0.202 | NA        | 3.391E-01 |
| SP110      | -0.202 | 2.078E-01 | 6.556E-03 |
| RPS7       | -0.202 | 3.648E-02 | 5.221E-01 |
| ZNF618     | -0.202 | 2.449E-01 | 7.074E-01 |
| HECTD4     | -0.202 | 3.999E-02 | 1.665E-01 |
| SLC40A1    | -0.202 | 4.261E-01 | 3.093E-01 |
| APOBEC3D   | -0.203 | 2.569E-01 | 1.130E-03 |
| TPD52L3    | -0.203 | NA        | 1.231E-01 |
| MSS51      | -0.203 | 1.816E-01 | 4.180E-03 |
| BTLA       | -0.203 | 5.522E-01 | 1.269E-01 |
| JAK3       | -0.203 | 3.181E-01 | 4.709E-01 |
| CNTN2      | -0.203 | 6.443E-01 | 2.798E-02 |
| P2RY1      | -0.203 | 5.118E-01 | 2.214E-01 |
| CLDN34     | -0.203 | 5.526E-01 | 8.586E-02 |
| ZUFSP      | -0.203 | 1.818E-03 | 4.094E-02 |
| FREM3      | -0.203 | 5.752E-01 | 1.856E-01 |
| MIR6867    | -0.203 | 6.219E-01 | 3.263E-01 |
| LTBP4      | -0.203 | 2.748E-01 | 9.874E-02 |
| LRRC56     | -0.203 | 2.098E-01 | 7.838E-02 |
| COQ3       | -0.203 | 3.479E-02 | 2.201E-01 |
| CXXC1      | -0.203 | 8.970E-02 | 4.794E-02 |
| DEFB134    | -0.203 | 8.570E-01 | 7.720E-02 |
| CENPV      | -0.203 | 4.216E-01 | 1.254E-02 |
| MATR3      | -0.204 | 2.073E-01 | 4.550E-01 |
| MIR370     | -0.204 | NA        | 2.798E-01 |
| IL24       | -0.204 | 5.607E-01 | 7.303E-01 |
| C9orf72    | -0.204 | 9.540E-02 | 6.970E-03 |

|            |        |           |           |
|------------|--------|-----------|-----------|
| ACAD11     | -0.204 | 2.250E-01 | 1.769E-01 |
| LBP        | -0.204 | 6.711E-01 | 7.966E-01 |
| ABCG8      | -0.204 | 7.084E-01 | 5.599E-01 |
| MYOZ3      | -0.204 | 4.773E-01 | 2.951E-01 |
| KDM4B      | -0.204 | 2.228E-02 | 7.700E-02 |
| OSGEPL1    | -0.204 | 9.841E-03 | 5.483E-02 |
| MIR3188    | -0.204 | NA        | 5.888E-01 |
| MIR324     | -0.204 | 5.127E-01 | 4.624E-02 |
| MAP3K4     | -0.204 | 9.308E-03 | 2.111E-01 |
| TNIK       | -0.204 | 4.441E-01 | 2.397E-02 |
| PGLS       | -0.204 | 8.844E-02 | 2.131E-02 |
| FBRSL1     | -0.204 | 2.322E-02 | 8.300E-03 |
| ANGPTL8    | -0.204 | 3.406E-01 | 3.821E-01 |
| MIR1203    | -0.204 | NA        | 4.612E-01 |
| GJC3       | -0.204 | 4.895E-01 | 2.805E-02 |
| TMEM198    | -0.204 | 2.429E-01 | 3.350E-01 |
| LSMEM2     | -0.204 | 5.578E-01 | 2.668E-01 |
| UBE2L6     | -0.204 | 3.082E-01 | 5.095E-01 |
| METTL8     | -0.204 | 3.830E-02 | 4.931E-01 |
| MCTP1      | -0.204 | 3.902E-01 | 1.762E-01 |
| COL17A1    | -0.205 | 6.707E-01 | 4.134E-02 |
| MASP2      | -0.205 | 3.842E-01 | 2.164E-01 |
| BTNL2      | -0.205 | 7.566E-01 | 2.352E-01 |
| NOP14      | -0.205 | 4.791E-03 | 8.210E-03 |
| ANKRD44    | -0.205 | 2.416E-01 | 3.642E-01 |
| SLFN12     | -0.205 | 3.470E-01 | 5.035E-01 |
| PROKR1     | -0.205 | 6.894E-01 | 8.600E-01 |
| RIMS3      | -0.205 | 3.953E-01 | 2.548E-01 |
| CCDC73     | -0.205 | 3.458E-01 | 5.695E-01 |
| MDM4       | -0.205 | 4.605E-02 | 7.683E-01 |
| HCK        | -0.205 | 4.980E-01 | 5.374E-01 |
| AC073082.1 | -0.205 | 7.604E-01 | 4.594E-01 |
| MAN2C1     | -0.205 | 4.818E-02 | 1.142E-02 |
| FMN2       | -0.205 | 6.935E-01 | 1.630E-01 |
| OR6K3      | -0.205 | NA        | 3.856E-01 |
| KRTAP9-3   | -0.205 | NA        | 1.019E-01 |
| PMFBP1     | -0.205 | 3.365E-01 | 8.414E-01 |
| RPS20      | -0.205 | 6.012E-02 | 9.562E-02 |
| MT-CO1     | -0.205 | 2.975E-01 | 5.481E-02 |
| FBXO2      | -0.206 | 5.358E-01 | 5.466E-01 |
| KIAA0391   | -0.206 | 1.032E-02 | 4.251E-01 |
| MTHFD2L    | -0.206 | 3.148E-02 | 3.846E-01 |
| STARD10    | -0.206 | 2.122E-01 | 7.138E-02 |
| HSCB       | -0.206 | 4.055E-02 | 3.572E-01 |
| PSCA       | -0.206 | 6.938E-01 | 3.433E-01 |
| SLC18A2    | -0.206 | 4.729E-01 | 3.614E-01 |
| C2CD4C     | -0.206 | 4.284E-01 | 2.419E-01 |
| MAGEB6P1   | -0.206 | NA        | 8.008E-01 |
| VSIG4      | -0.206 | 5.778E-01 | 1.277E-01 |
| OPCML      | -0.206 | 5.897E-01 | 9.412E-01 |

|          |        |           |           |
|----------|--------|-----------|-----------|
| KATNBL1  | -0.206 | 8.795E-03 | 1.810E-03 |
| DOK4     | -0.206 | 9.614E-02 | 2.112E-01 |
| TEP1     | -0.206 | 4.980E-02 | 1.937E-01 |
| TRMT11   | -0.206 | 1.634E-02 | 2.083E-02 |
| OR51E1   | -0.206 | 3.132E-01 | 7.248E-03 |
| MIR5190  | -0.206 | NA        | 7.916E-03 |
| CLRN1    | -0.206 | NA        | 5.728E-01 |
| TNP1     | -0.206 | NA        | 1.987E-01 |
| ZNF219   | -0.206 | 9.798E-02 | 5.960E-01 |
| ANAPC7   | -0.206 | 4.641E-03 | 6.510E-02 |
| IL27     | -0.206 | 5.371E-01 | 6.160E-01 |
| OR10A2   | -0.206 | NA        | 1.502E-01 |
| AWAT2    | -0.207 | 7.625E-01 | 1.757E-01 |
| PCK1     | -0.207 | 7.638E-01 | 8.134E-02 |
| PKP3     | -0.207 | 2.551E-01 | 3.608E-02 |
| RTN4IP1  | -0.207 | 8.161E-02 | 2.166E-01 |
| KAT2A    | -0.207 | 4.994E-02 | 6.549E-01 |
| GCDH     | -0.207 | 9.522E-03 | 2.185E-01 |
| MRPS25   | -0.207 | 7.826E-02 | 1.925E-02 |
| HOXA2    | -0.207 | 3.729E-01 | 5.746E-01 |
| FBXL13   | -0.207 | 2.226E-01 | 3.636E-01 |
| RHOBTB3  | -0.207 | 3.651E-01 | 3.711E-03 |
| RDH16    | -0.207 | 4.800E-01 | 1.781E-03 |
| MPEG1    | -0.207 | 4.735E-01 | 2.713E-01 |
| C9orf85  | -0.207 | 1.724E-02 | 4.109E-02 |
| CCNJ     | -0.207 | 1.795E-01 | 6.484E-01 |
| WDR64    | -0.207 | 5.213E-01 | 5.524E-02 |
| PSMB8    | -0.208 | 2.479E-01 | 1.536E-01 |
| LPAR2    | -0.208 | 1.107E-01 | 6.477E-02 |
| SV2C     | -0.208 | 5.628E-01 | 2.700E-01 |
| C6orf118 | -0.208 | 7.180E-01 | 2.437E-02 |
| MRNIP    | -0.208 | 1.226E-01 | 9.319E-03 |
| TCOF1    | -0.208 | 1.639E-02 | 3.266E-01 |
| MIR181B1 | -0.208 | NA        | 1.079E-03 |
| MIR138-1 | -0.208 | NA        | 3.421E-01 |
| CDH22    | -0.208 | 7.415E-01 | 9.151E-02 |
| PRAMEF18 | -0.208 | NA        | 1.904E-01 |
| MIR4294  | -0.208 | NA        | 3.069E-01 |
| POLR3G   | -0.208 | 3.561E-01 | 3.226E-01 |
| DLX6     | -0.208 | 5.643E-01 | 2.810E-02 |
| MATK     | -0.208 | 5.052E-01 | 7.387E-02 |
| TWINK    | -0.208 | 2.616E-02 | 7.590E-02 |
| FERMT3   | -0.208 | 4.223E-01 | 4.386E-01 |
| CRYBB3   | -0.208 | 3.840E-01 | 5.694E-02 |
| ZNF763   | -0.209 | 2.760E-01 | 1.837E-01 |
| ATP4A    | -0.209 | 7.397E-01 | 3.414E-01 |
| BAIAP3   | -0.209 | 5.011E-01 | 4.606E-04 |
| FAM213A  | -0.209 | 2.627E-01 | 2.918E-01 |
| EMB      | -0.209 | 3.323E-01 | 1.016E-01 |
| RAB44    | -0.209 | 4.163E-01 | 8.106E-02 |



|           |        |           |           |
|-----------|--------|-----------|-----------|
| ZNF699    | -0.209 | 2.096E-01 | 4.198E-01 |
| CDK3      | -0.209 | 2.210E-01 | 3.154E-01 |
| MIR6797   | -0.209 | 2.730E-01 | 2.143E-01 |
| TOX       | -0.209 | 5.175E-01 | 7.922E-02 |
| FBXL6     | -0.209 | 5.883E-02 | 9.072E-01 |
| SMTNL1    | -0.209 | 5.133E-01 | 1.299E-01 |
| GNPDA1    | -0.209 | 2.727E-02 | 3.103E-01 |
| LGALS9    | -0.209 | 3.504E-01 | 8.752E-01 |
| HARS2     | -0.209 | 1.902E-03 | 4.580E-02 |
| MIR4715   | -0.209 | NA        | 5.822E-01 |
| PICK1     | -0.209 | 5.768E-02 | 2.484E-01 |
| MIR6859-1 | -0.210 | 5.236E-01 | 2.483E-01 |
| ABRACL    | -0.210 | 5.667E-02 | 8.803E-01 |
| TMPRSS15  | -0.210 | 7.904E-01 | 2.334E-01 |
| PML       | -0.210 | 1.058E-01 | 2.223E-02 |
| SIGLEC11  | -0.210 | 5.540E-01 | 1.679E-01 |
| LONRF1    | -0.210 | 1.110E-01 | 1.755E-01 |
| MIR4766   | -0.210 | 7.202E-01 | 3.683E-01 |
| EEPD1     | -0.210 | 2.790E-01 | 1.652E-02 |
| SIGLEC12  | -0.210 | 6.169E-01 | 5.582E-01 |
| ACVR1C    | -0.210 | 5.373E-01 | 5.357E-01 |
| DNAH10    | -0.210 | 3.871E-01 | 3.024E-02 |
| ECHDC3    | -0.210 | 6.177E-01 | 4.930E-01 |
| GUF1      | -0.210 | 1.868E-03 | 6.301E-02 |
| RHOT2     | -0.210 | 2.220E-02 | 4.218E-02 |
| CSNK1A1L  | -0.211 | 6.701E-01 | 5.420E-02 |
| GSTZ1     | -0.211 | 1.145E-01 | 3.067E-03 |
| DPEP3     | -0.211 | 5.971E-01 | 7.063E-02 |
| TBC1D8    | -0.211 | 2.174E-01 | 5.156E-01 |
| CCDC159   | -0.211 | 1.629E-01 | 2.649E-02 |
| CYLC1     | -0.211 | NA        | 9.372E-03 |
| MED28     | -0.211 | 6.392E-04 | 1.254E-01 |
| MSRA      | -0.211 | 1.670E-01 | 2.925E-02 |
| CPSF4L    | -0.211 | 5.010E-01 | 1.688E-02 |
| MPPED2    | -0.211 | 5.735E-01 | 1.806E-01 |
| ACE       | -0.211 | 2.161E-01 | 3.196E-02 |
| TTC19     | -0.211 | 2.204E-02 | 2.641E-01 |
| TMEM191C  | -0.211 | 4.979E-01 | 9.297E-02 |
| ZNF738    | -0.211 | 2.427E-01 | 1.122E-03 |
| IL15      | -0.211 | 3.493E-01 | 8.483E-02 |
| RMND1     | -0.211 | 5.562E-03 | 5.893E-01 |
| MPHOSPH6  | -0.211 | 3.460E-02 | 5.027E-01 |
| A3GALT2   | -0.211 | 5.788E-01 | 1.361E-01 |
| RS1       | -0.211 | 5.436E-01 | 5.288E-01 |
| VAV2      | -0.211 | 1.872E-01 | 2.769E-01 |
| RFLNA     | -0.211 | 6.211E-01 | 8.641E-01 |
| GNGT2     | -0.211 | 3.673E-01 | 1.288E-01 |
| ATAT1     | -0.211 | 1.289E-01 | 5.161E-01 |
| MRPL42    | -0.211 | 3.796E-03 | 2.512E-01 |
| RPL28     | -0.212 | 1.033E-01 | 9.179E-02 |

|            |        |           |           |
|------------|--------|-----------|-----------|
| TMEM72     | -0.212 | 6.941E-01 | 1.413E-01 |
| PFAS       | -0.212 | 3.147E-02 | 1.659E-01 |
| IMPA1      | -0.212 | 5.550E-02 | 9.155E-01 |
| MS4A2      | -0.212 | 5.153E-01 | 2.609E-01 |
| FAAP100    | -0.212 | 5.759E-03 | 3.653E-01 |
| TMEM94     | -0.212 | 3.474E-02 | 4.203E-01 |
| MIR5699    | -0.212 | NA        | 4.236E-01 |
| CENPK      | -0.212 | 1.476E-01 | 2.674E-01 |
| SYBU       | -0.212 | 5.516E-01 | 3.544E-01 |
| C11orf40   | -0.212 | NA        | 1.876E-01 |
| CXorf21    | -0.212 | 4.568E-01 | 1.247E-01 |
| MIR3146    | -0.212 | NA        | 8.237E-03 |
| C12orf10   | -0.212 | 1.159E-02 | 1.876E-02 |
| VHLL       | -0.212 | NA        | 3.248E-02 |
| KCTD1      | -0.212 | 2.733E-01 | 1.787E-02 |
| NUP43      | -0.213 | 1.781E-04 | 6.377E-03 |
| RPL10A     | -0.213 | 2.349E-02 | 3.449E-01 |
| BLOC1S4    | -0.213 | 3.078E-02 | 3.037E-02 |
| NPIPA1     | -0.213 | 1.519E-01 | 1.715E-01 |
| STK36      | -0.213 | 9.947E-02 | 2.044E-02 |
| AC004805.1 | -0.213 | 8.158E-01 | 2.061E-01 |
| ARL9       | -0.213 | 4.938E-01 | 6.979E-01 |
| MIR3928    | -0.213 | NA        | 6.888E-03 |
| THG1L      | -0.213 | 9.293E-03 | 1.495E-02 |
| HOMEZ      | -0.213 | 4.068E-02 | 4.510E-01 |
| COX7C      | -0.213 | 2.595E-02 | 1.402E-01 |
| TCP1       | -0.213 | 5.081E-03 | 5.366E-01 |
| SYT3       | -0.213 | 5.612E-01 | 1.191E-02 |
| VIP        | -0.213 | 4.910E-01 | 2.086E-01 |
| CYP2J2     | -0.213 | 4.912E-01 | 4.468E-01 |
| CPSF6      | -0.213 | 1.084E-02 | 6.706E-03 |
| OR52D1     | -0.213 | 7.671E-01 | 3.132E-01 |
| CXorf49    | -0.213 | 8.773E-01 | 7.851E-01 |
| WNT7B      | -0.213 | 3.544E-01 | 8.004E-01 |
| MIR3173    | -0.214 | NA        | 1.678E-01 |
| SLC39A4    | -0.214 | 2.051E-01 | 6.475E-01 |
| GRPEL1     | -0.214 | 1.083E-02 | 5.382E-01 |
| RPL18A     | -0.214 | 7.971E-02 | 9.314E-02 |
| MIR99B     | -0.214 | 7.441E-01 | 1.508E-01 |
| ENGASE     | -0.214 | 2.356E-01 | 5.184E-01 |
| GTF2IRD2   | -0.214 | 2.000E-01 | 8.894E-02 |
| SPTA1      | -0.214 | 6.086E-01 | 7.422E-01 |
| CT45A5     | -0.214 | 8.854E-01 | 2.996E-01 |
| SREK1      | -0.214 | 1.849E-02 | 7.966E-02 |
| ZNF547     | -0.214 | 1.664E-01 | 7.378E-03 |
| IL17RA     | -0.214 | 1.086E-02 | 2.678E-01 |
| ENOSF1     | -0.214 | 7.972E-02 | 7.534E-02 |
| LVRN       | -0.214 | 5.559E-01 | 5.525E-01 |
| ARRDC4     | -0.214 | 2.326E-01 | 4.194E-01 |
| ISOC1      | -0.214 | 4.527E-02 | 2.922E-02 |

|            |        |           |           |
|------------|--------|-----------|-----------|
| SIX1       | -0.214 | 3.511E-01 | 1.578E-03 |
| FANCF      | -0.214 | 4.986E-02 | 2.886E-01 |
| RPL5       | -0.215 | 1.547E-02 | 4.221E-01 |
| IFIH1      | -0.215 | 3.403E-01 | 5.118E-01 |
| SWSAP1     | -0.215 | 7.126E-02 | 3.060E-01 |
| UBE2N      | -0.215 | 1.116E-03 | 8.405E-02 |
| TSEN2      | -0.215 | 1.565E-01 | 2.034E-01 |
| DNAJC5G    | -0.215 | 5.310E-01 | 8.537E-02 |
| DNAH11     | -0.215 | 6.682E-01 | 6.395E-01 |
| SALL2      | -0.215 | 3.838E-01 | 6.401E-01 |
| SLC35E3    | -0.215 | 1.601E-01 | 2.605E-01 |
| C12orf71   | -0.215 | 4.176E-01 | 9.296E-01 |
| CEACAM4    | -0.215 | 5.551E-01 | 9.164E-03 |
| UTP15      | -0.215 | 2.456E-03 | 8.931E-02 |
| FAU        | -0.215 | 3.158E-02 | 7.775E-01 |
| EPHA6      | -0.215 | 6.579E-01 | 6.629E-01 |
| APOBEC3H   | -0.216 | 3.593E-01 | 8.759E-01 |
| CHST10     | -0.216 | 3.547E-01 | 5.817E-03 |
| SPINK5     | -0.216 | 5.706E-01 | 4.642E-01 |
| MIR590     | -0.216 | 4.348E-01 | 2.415E-01 |
| FGFR1OP    | -0.216 | 1.100E-02 | 1.933E-02 |
| RPL23      | -0.216 | 5.041E-02 | 7.907E-01 |
| IFI44      | -0.216 | 4.279E-01 | 1.596E-01 |
| NFE2       | -0.216 | 5.684E-01 | 2.147E-01 |
| CTSS       | -0.216 | 2.487E-01 | 7.839E-01 |
| PHACTR1    | -0.216 | 3.430E-01 | 3.842E-01 |
| RPS29      | -0.216 | 5.593E-02 | 5.902E-01 |
| LNX1       | -0.216 | 2.155E-01 | 7.454E-01 |
| MKNK2      | -0.217 | 5.800E-02 | 4.458E-01 |
| ZADH2      | -0.217 | 1.129E-02 | 1.078E-01 |
| CCDC183    | -0.217 | 4.190E-01 | 1.803E-02 |
| GPCPD1     | -0.217 | 7.844E-02 | 3.398E-01 |
| SPAG6      | -0.217 | 6.367E-01 | 1.041E-01 |
| JUNB       | -0.217 | 1.321E-01 | 2.121E-01 |
| C19orf66   | -0.217 | 5.331E-02 | 1.182E-01 |
| CHEK2      | -0.217 | 3.150E-02 | 1.560E-02 |
| PINX1      | -0.217 | 6.772E-02 | 2.574E-01 |
| PCDHB4     | -0.217 | 4.589E-01 | 8.259E-01 |
| RILP       | -0.218 | 1.596E-01 | 2.253E-02 |
| RASGRP3    | -0.218 | 1.331E-01 | 7.986E-02 |
| SLC38A2    | -0.218 | 8.161E-02 | 6.350E-01 |
| SYCP2      | -0.218 | 4.696E-01 | 2.476E-01 |
| PCED1A     | -0.218 | 8.408E-02 | 1.407E-02 |
| C2orf78    | -0.218 | NA        | 3.940E-01 |
| CEP44      | -0.218 | 9.320E-02 | 3.182E-01 |
| C1orf53    | -0.218 | 1.478E-01 | 2.656E-01 |
| JAML       | -0.218 | 4.106E-01 | 1.428E-01 |
| TSPOAP1    | -0.218 | 4.128E-01 | 1.171E-01 |
| DC1B-GALN7 | -0.218 | 8.630E-02 | 2.573E-01 |
| TIGD1      | -0.218 | 6.795E-02 | 5.295E-01 |

|            |        |           |           |
|------------|--------|-----------|-----------|
| WDR77      | -0.218 | 1.324E-02 | 5.560E-02 |
| SLC4A8     | -0.218 | 4.366E-01 | 3.192E-01 |
| SRXN1      | -0.218 | 3.219E-01 | 1.380E-01 |
| ZNF224     | -0.218 | 9.054E-02 | 1.629E-01 |
| RPS4X      | -0.218 | 2.464E-02 | 5.094E-02 |
| MRPL54     | -0.219 | 7.805E-02 | 8.646E-01 |
| AC040162.4 | -0.219 | 7.085E-01 | 1.738E-03 |
| AC092647.5 | -0.219 | 3.914E-01 | 6.079E-02 |
| MIR3145    | -0.219 | NA        | 5.254E-01 |
| TMEM151B   | -0.219 | 5.204E-01 | 3.278E-01 |
| ITIH4      | -0.219 | 2.758E-01 | 3.905E-01 |
| KDR        | -0.219 | 1.802E-01 | 6.006E-01 |
| ITM2C      | -0.219 | 3.432E-01 | 2.445E-01 |
| ATP6AP1L   | -0.219 | 1.441E-01 | 6.458E-03 |
| IL1F10     | -0.219 | 7.665E-01 | 6.803E-01 |
| MYL6B      | -0.219 | 1.233E-01 | 9.167E-02 |
| ZNF18      | -0.219 | 8.648E-03 | 1.401E-02 |
| GPAM       | -0.219 | 1.082E-01 | 1.965E-01 |
| CACNA1S    | -0.219 | 6.842E-01 | 3.807E-01 |
| MIR582     | -0.219 | NA        | 4.355E-01 |
| CAPN10     | -0.219 | 1.718E-02 | 2.350E-01 |
| KCNH6      | -0.219 | 5.845E-01 | 3.397E-01 |
| VILL       | -0.219 | 4.799E-01 | 1.418E-01 |
| ADGRF3     | -0.220 | 1.490E-01 | 1.992E-02 |
| PRH2       | -0.220 | 3.989E-01 | 6.309E-01 |
| PIK3CG     | -0.220 | 3.987E-01 | 7.117E-02 |
| TRMU       | -0.220 | 1.191E-02 | 1.168E-01 |
| BHLHE41    | -0.220 | 3.864E-01 | 2.284E-01 |
| B3GNT6     | -0.220 | 7.396E-01 | 1.372E-01 |
| NOP16      | -0.220 | 2.889E-02 | 8.906E-02 |
| NACA       | -0.220 | 4.017E-03 | 2.069E-01 |
| RFXANK     | -0.220 | 3.230E-02 | 1.437E-01 |
| CDK10      | -0.220 | 4.652E-02 | 2.628E-02 |
| MBD3L1     | -0.220 | NA        | 5.804E-02 |
| MCRIP2     | -0.221 | 1.538E-01 | 3.119E-01 |
| PDCD2      | -0.221 | 1.206E-03 | 6.996E-02 |
| MIR486-1   | -0.221 | NA        | 5.400E-01 |
| TARBP2     | -0.221 | 8.648E-03 | 6.112E-02 |
| PRAMEF4    | -0.221 | NA        | 8.196E-02 |
| GALNT7     | -0.221 | 9.243E-02 | 7.319E-03 |
| HES3       | -0.221 | NA        | 7.778E-02 |
| GMIP       | -0.221 | 2.817E-02 | 8.554E-02 |
| SESN1      | -0.221 | 6.086E-02 | 9.107E-01 |
| TAP1       | -0.221 | 3.803E-01 | 2.608E-01 |
| AMD1       | -0.221 | 1.126E-02 | 4.798E-01 |
| KCNT2      | -0.221 | 5.030E-01 | 3.864E-03 |
| GIMAP5     | -0.221 | 3.897E-01 | 6.541E-02 |
| PRODH      | -0.221 | 5.641E-01 | 3.698E-04 |
| BRS3       | -0.221 | 6.253E-01 | 2.884E-01 |
| PTPRE      | -0.221 | 1.509E-01 | 4.067E-02 |

|            |        |           |           |
|------------|--------|-----------|-----------|
| HHEX       | -0.221 | 2.830E-01 | 8.587E-02 |
| TSPAN10    | -0.222 | 3.240E-01 | 8.187E-02 |
| C19orf67   | -0.222 | 4.908E-01 | 6.917E-01 |
| TTC38      | -0.222 | 3.999E-02 | 6.847E-02 |
| SSX7       | -0.222 | NA        | 2.411E-02 |
| KPNA5      | -0.222 | 3.460E-02 | 5.563E-01 |
| RPS3       | -0.222 | 6.781E-02 | 1.119E-01 |
| TUBA4A     | -0.222 | 3.495E-01 | 2.018E-01 |
| NOP53      | -0.222 | 7.823E-02 | 2.389E-04 |
| PRPF39     | -0.222 | 1.257E-02 | 3.964E-02 |
| MIR6804    | -0.222 | 6.363E-01 | 2.543E-03 |
| AC011511.1 | -0.222 | 2.139E-01 | 2.910E-02 |
| FUT10      | -0.223 | 7.202E-02 | 2.708E-01 |
| KHDC3L     | -0.223 | 7.934E-01 | 3.801E-01 |
| INTU       | -0.223 | 1.087E-01 | 2.897E-01 |
| NT5DC1     | -0.223 | 4.243E-03 | 3.276E-01 |
| PDE6H      | -0.223 | 6.958E-01 | 9.104E-01 |
| PCDHB1     | -0.223 | 6.848E-01 | 3.733E-02 |
| CYTIP      | -0.223 | 4.310E-01 | 3.075E-01 |
| ATP12A     | -0.223 | 6.988E-01 | 2.986E-01 |
| PPIAL4C    | -0.223 | 5.425E-01 | 7.646E-02 |
| ARL15      | -0.223 | 6.902E-02 | 3.515E-03 |
| C6orf222   | -0.223 | 6.430E-01 | 1.728E-01 |
| ENPP7      | -0.224 | 6.212E-01 | 1.366E-01 |
| ALOX5      | -0.224 | 3.522E-01 | 2.909E-01 |
| NRXN3      | -0.224 | 5.739E-01 | 6.286E-01 |
| ANKRD63    | -0.224 | 7.850E-01 | 3.785E-01 |
| SIRT6      | -0.224 | 1.104E-02 | 7.467E-01 |
| STAT4      | -0.224 | 3.376E-01 | 2.549E-01 |
| ACSL5      | -0.224 | 3.590E-01 | 5.881E-01 |
| ABCC11     | -0.224 | 2.425E-01 | 1.384E-01 |
| WDFY2      | -0.224 | 2.492E-02 | 2.317E-01 |
| MT-CO3     | -0.224 | 1.786E-01 | 1.102E-03 |
| GMFB       | -0.224 | 1.254E-02 | 3.087E-01 |
| MIR5690    | -0.224 | NA        | 4.149E-01 |
| PKHD1      | -0.225 | 6.276E-01 | 1.263E-01 |
| SCNN1G     | -0.225 | 6.298E-01 | 5.060E-02 |
| C3orf62    | -0.225 | 3.478E-02 | 1.875E-01 |
| RNF44      | -0.225 | 1.767E-02 | 1.334E-02 |
| RPL24      | -0.225 | 2.939E-02 | 2.080E-02 |
| ZNF540     | -0.225 | 2.399E-01 | 4.115E-01 |
| HAPLN3     | -0.225 | 4.040E-01 | 3.130E-02 |
| DDX11      | -0.225 | 3.448E-02 | 3.639E-01 |
| ZNF519     | -0.225 | 1.249E-01 | 1.236E-01 |
| ZNF93      | -0.226 | 2.379E-01 | 4.230E-02 |
| AC008073.3 | -0.226 | 6.737E-01 | 1.213E-01 |
| SLIT3      | -0.226 | 4.064E-01 | 5.200E-04 |
| TAF1C      | -0.226 | 1.680E-02 | 2.407E-01 |
| AQP2       | -0.226 | 7.900E-01 | 1.207E-01 |
| ACVR1B     | -0.226 | 4.155E-02 | 2.136E-01 |

|           |        |           |           |
|-----------|--------|-----------|-----------|
| RTP4      | -0.226 | 3.339E-01 | 3.535E-01 |
| DUSP4     | -0.226 | 3.188E-01 | 3.721E-02 |
| MPRSS4-AS | -0.226 | 5.984E-01 | 1.071E-02 |
| MAP3K5    | -0.226 | 8.967E-02 | 3.470E-01 |
| SPATA9    | -0.227 | 2.131E-01 | 1.596E-02 |
| DLX4      | -0.227 | 4.425E-01 | 1.058E-03 |
| IFITM1    | -0.227 | 4.445E-01 | 2.014E-01 |
| PITX1     | -0.227 | 4.151E-01 | 9.139E-01 |
| MKRN3     | -0.227 | 6.970E-01 | 6.078E-01 |
| TMEM225B  | -0.227 | 4.001E-01 | 2.770E-01 |
| NDUFAF2   | -0.227 | 2.727E-02 | 2.448E-01 |
| CLHC1     | -0.227 | 1.042E-01 | 4.169E-01 |
| SCLY      | -0.227 | 1.650E-02 | 1.046E-02 |
| MMP13     | -0.227 | 6.424E-01 | 1.762E-01 |
| CASP4     | -0.227 | 1.568E-01 | 1.844E-01 |
| AGMO      | -0.227 | 6.680E-01 | 1.181E-01 |
| CCDC57    | -0.227 | 5.532E-02 | 8.063E-02 |
| LANCL2    | -0.227 | 2.763E-02 | 5.854E-01 |
| XAGE5     | -0.227 | 9.029E-01 | 3.290E-01 |
| RPLP2     | -0.228 | 5.756E-02 | 7.816E-02 |
| LIAS      | -0.228 | 8.365E-03 | 2.177E-01 |
| CECR2     | -0.228 | 6.032E-01 | 8.193E-02 |
| SLC44A5   | -0.228 | 4.087E-01 | 3.048E-02 |
| ZNF483    | -0.228 | 2.405E-01 | 2.990E-01 |
| 43899.000 | -0.228 | 6.515E-02 | 7.828E-03 |
| EGFL8     | -0.228 | 2.007E-01 | 3.620E-01 |
| HIST2H3A  | -0.228 | NA        | 1.985E-01 |
| SOWAHD    | -0.228 | 2.407E-01 | 1.354E-01 |
| TRPV5     | -0.228 | 5.146E-01 | 2.762E-01 |
| MAGEC3    | -0.228 | 7.229E-01 | 7.782E-03 |
| CPA6      | -0.228 | 6.435E-01 | 1.975E-01 |
| GAL3ST1   | -0.228 | 5.436E-01 | 2.975E-01 |
| FAM160B2  | -0.228 | 2.227E-02 | 6.458E-03 |
| USP18     | -0.228 | 2.351E-01 | 2.575E-01 |
| POU2F2    | -0.228 | 3.083E-01 | 1.173E-01 |
| LRP12     | -0.228 | 2.460E-01 | 1.320E-01 |
| GOLGA6L22 | -0.228 | 8.765E-01 | 3.953E-02 |
| PDE4D     | -0.228 | 1.612E-01 | 2.000E-03 |
| CSAG1     | -0.229 | 7.559E-01 | 3.545E-01 |
| MRPS36    | -0.229 | 5.335E-03 | 8.798E-03 |
| YBEY      | -0.229 | 1.317E-01 | 4.764E-01 |
| TCF7      | -0.229 | 2.390E-01 | 3.017E-01 |
| SERPIN3   | -0.229 | 7.335E-01 | 2.895E-01 |
| ETV7      | -0.229 | 2.885E-01 | 2.939E-01 |
| DOK3      | -0.229 | 2.580E-01 | 5.781E-01 |
| CDKAL1    | -0.229 | 2.109E-01 | 5.233E-01 |
| SAMD10    | -0.229 | 1.874E-01 | 2.570E-01 |
| TSPAN3    | -0.229 | 2.116E-02 | 1.154E-01 |
| OR51A7    | -0.229 | NA        | 2.819E-01 |
| KRTAP27-1 | -0.229 | NA        | 1.841E-01 |

|              |        |           |           |
|--------------|--------|-----------|-----------|
| BIVM-ERCC:   | -0.229 | 6.937E-01 | 1.081E-01 |
| PARP3        | -0.229 | 8.949E-02 | 2.911E-01 |
| ARVCF        | -0.229 | 2.002E-01 | 4.288E-01 |
| DEPTOR       | -0.229 | 3.848E-01 | 1.148E-02 |
| MYO15A       | -0.229 | 2.257E-01 | 3.123E-02 |
| IL20RA       | -0.230 | 3.339E-01 | 1.688E-01 |
| PHOSPHO1     | -0.230 | 3.311E-01 | 3.542E-01 |
| GRAP         | -0.230 | 2.666E-01 | 3.584E-03 |
| DYNLRB2      | -0.230 | 4.256E-01 | 3.392E-03 |
| PAG1         | -0.230 | 1.861E-01 | 5.259E-02 |
| MS4A13       | -0.230 | 8.504E-01 | 8.667E-01 |
| HES7         | -0.230 | 5.419E-01 | 8.499E-02 |
| NAB1         | -0.230 | 8.038E-02 | 7.521E-01 |
| LPCAT2       | -0.230 | 2.134E-01 | 2.422E-01 |
| KHD1-EIF4E]  | -0.230 | 5.457E-02 | 3.518E-01 |
| CLEC4F       | -0.230 | 5.310E-01 | 1.579E-01 |
| ZBTB48       | -0.230 | 2.667E-02 | 3.859E-01 |
| CYBA         | -0.230 | 1.872E-01 | 7.166E-01 |
| BCS1L        | -0.230 | 9.642E-03 | 6.150E-01 |
| CCDC39       | -0.230 | 1.708E-01 | 5.632E-01 |
| ZNF280A      | -0.230 | 7.875E-01 | 2.448E-01 |
| HNRNPA1      | -0.231 | 4.129E-04 | 3.906E-01 |
| PRAMEF2      | -0.231 | NA        | 5.953E-02 |
| HAO1         | -0.231 | 8.033E-01 | 5.941E-01 |
| CHADL        | -0.231 | 2.478E-01 | 2.384E-04 |
| NECTIN1      | -0.231 | 2.463E-01 | 1.597E-03 |
| MIR770       | -0.231 | NA        | 5.620E-02 |
| BBS5         | -0.231 | 1.486E-02 | 1.623E-01 |
| OR11H6       | -0.231 | 7.443E-01 | 3.972E-01 |
| TMEM133      | -0.231 | 1.222E-01 | 1.691E-01 |
| RPS9         | -0.231 | 2.391E-02 | 2.099E-02 |
| AC009690.1   | -0.231 | 3.782E-01 | 4.951E-01 |
| DOCK5        | -0.231 | 1.261E-01 | 5.274E-01 |
| CCL25        | -0.231 | 6.198E-01 | 9.887E-03 |
| SNAI2        | -0.231 | 3.714E-01 | 3.255E-02 |
| SEPSECS      | -0.231 | 6.967E-03 | 4.481E-03 |
| GOLGA8G      | -0.231 | 7.970E-01 | 8.165E-02 |
| MIR222       | -0.231 | 7.780E-01 | 1.273E-01 |
| MIR4506      | -0.232 | NA        | 8.807E-01 |
| RPS8         | -0.232 | 2.598E-02 | 6.520E-02 |
| ZNF121       | -0.232 | 5.929E-02 | 7.467E-03 |
| THEM6        | -0.232 | 2.356E-01 | 3.854E-02 |
| MAML3        | -0.232 | 1.512E-01 | 4.523E-01 |
| CCDC130      | -0.232 | 2.263E-02 | 3.861E-01 |
| ABCC5        | -0.232 | 2.508E-01 | 9.809E-02 |
| ADA2         | -0.232 | 3.337E-01 | 1.954E-01 |
| RPS13        | -0.232 | 1.695E-02 | 3.069E-01 |
| SPB2-C11orf: | -0.232 | NA        | 9.620E-03 |
| IFI30        | -0.232 | 2.717E-01 | 8.920E-02 |
| TMEM56       | -0.232 | 3.709E-01 | 3.677E-01 |

|            |        |           |           |
|------------|--------|-----------|-----------|
| FAM90A1    | -0.232 | 4.670E-01 | 8.032E-02 |
| EVI2B      | -0.232 | 4.090E-01 | 3.248E-01 |
| SLC25A10   | -0.232 | 1.691E-01 | 2.544E-01 |
| NANOG      | -0.232 | 4.956E-01 | 6.094E-02 |
| KCNIP2     | -0.232 | 1.975E-01 | 1.960E-01 |
| CFAP44     | -0.233 | 2.122E-01 | 3.959E-01 |
| MIR648     | -0.233 | NA        | 4.891E-01 |
| SCO2       | -0.233 | 8.905E-02 | 2.360E-03 |
| TNK1       | -0.233 | 6.986E-02 | 9.581E-03 |
| AC091167.3 | -0.233 | 1.222E-01 | 8.544E-02 |
| AC104662.2 | -0.233 | NA        | 6.278E-02 |
| AL512785.2 | -0.233 | 5.792E-01 | 4.384E-01 |
| DCAF4L1    | -0.233 | 2.931E-01 | 2.667E-01 |
| PKD1L3     | -0.233 | 2.508E-01 | 1.362E-01 |
| MIR7111    | -0.233 | 2.645E-01 | 1.938E-01 |
| ARAP2      | -0.233 | 8.457E-02 | 4.947E-01 |
| FXVD2      | -0.233 | 4.958E-01 | 3.631E-01 |
| SLC24A4    | -0.233 | 3.081E-01 | 1.990E-01 |
| NWD2       | -0.233 | 5.999E-01 | 1.770E-03 |
| KLRC3      | -0.233 | 6.598E-01 | 4.641E-01 |
| ISL2       | -0.233 | 2.509E-01 | 5.092E-01 |
| IL9        | -0.233 | NA        | 3.534E-01 |
| DRICH1     | -0.233 | 3.761E-01 | 2.736E-01 |
| CRB2       | -0.234 | 5.026E-01 | 4.780E-03 |
| DCBLD1     | -0.234 | 1.513E-01 | 3.147E-01 |
| NUPR2      | -0.234 | 6.543E-01 | 1.562E-02 |
| RNASE2     | -0.234 | 4.840E-01 | 2.290E-01 |
| STRC       | -0.234 | 5.371E-01 | 2.969E-01 |
| FER1L5     | -0.234 | 2.299E-01 | 6.332E-03 |
| TAS2R46    | -0.234 | 6.106E-01 | 2.148E-01 |
| FAM135B    | -0.234 | 6.467E-01 | 7.735E-01 |
| EXTL3      | -0.234 | 5.642E-02 | 2.894E-01 |
| MIR339     | -0.234 | 4.407E-01 | 4.822E-01 |
| TSNARE1    | -0.234 | 3.536E-02 | 1.953E-02 |
| EN2        | -0.234 | 6.390E-01 | 3.353E-01 |
| ADAM21     | -0.234 | 4.471E-01 | 7.726E-02 |
| UCP1       | -0.235 | 6.261E-01 | 8.194E-02 |
| TET1       | -0.235 | 2.454E-01 | 4.488E-02 |
| FAM3B      | -0.235 | 5.994E-01 | 3.750E-01 |
| OTOL1      | -0.235 | NA        | 2.708E-01 |
| HS6ST2     | -0.235 | 4.950E-01 | 2.090E-02 |
| TSFM       | -0.235 | 1.179E-02 | 4.272E-01 |
| CELSR2     | -0.235 | 2.980E-01 | 3.138E-04 |
| MOG        | -0.235 | 7.402E-01 | 5.988E-03 |
| IFIT1B     | -0.235 | 6.488E-01 | 2.699E-01 |
| BDH2       | -0.235 | 4.300E-02 | 2.338E-01 |
| GPR15      | -0.235 | 6.259E-01 | 8.318E-02 |
| ZNF502     | -0.235 | 2.424E-01 | 5.235E-03 |
| TAGLN3     | -0.235 | 6.367E-01 | 8.410E-02 |
| TRIOBP     | -0.236 | 3.849E-02 | 2.838E-01 |



|            |        |           |           |
|------------|--------|-----------|-----------|
| YARS2      | -0.236 | 3.160E-03 | 2.437E-01 |
| BTAF1      | -0.236 | 3.578E-02 | 1.596E-01 |
| AC245033.1 | -0.236 | NA        | 7.129E-03 |
| CA6        | -0.236 | 6.620E-01 | 3.543E-02 |
| HTR3A      | -0.236 | 7.148E-01 | 4.236E-01 |
| FOXA1      | -0.236 | 4.709E-01 | 1.144E-01 |
| MIR1249    | -0.236 | 3.075E-01 | 2.907E-01 |
| HMGXB3     | -0.236 | 1.489E-04 | 4.847E-02 |
| PI16       | -0.236 | 6.234E-01 | 6.759E-02 |
| PPIP5K1    | -0.236 | 3.431E-02 | 3.841E-01 |
| KRTAP9-4   | -0.236 | NA        | 2.738E-03 |
| MIR4685    | -0.236 | 4.729E-01 | 1.677E-01 |
| SLC8B1     | -0.236 | 2.136E-02 | 2.740E-01 |
| SIDT1      | -0.236 | 3.618E-01 | 2.013E-02 |
| BFSP2      | -0.237 | 5.846E-01 | 8.754E-02 |
| MIR573     | -0.237 | 3.739E-01 | 2.125E-02 |
| LRRC37A    | -0.237 | 2.399E-01 | 3.966E-01 |
| CEACAM21   | -0.237 | 3.762E-01 | 5.798E-02 |
| CYBB       | -0.237 | 4.634E-01 | 6.381E-03 |
| NAA38      | -0.237 | 4.395E-02 | 2.007E-01 |
| CTAG1A     | -0.237 | 8.369E-01 | 1.370E-01 |
| CT45A10    | -0.238 | 8.599E-01 | 1.693E-01 |
| BSPH1      | -0.238 | NA        | 1.876E-01 |
| PSME2      | -0.238 | 6.515E-02 | 5.100E-01 |
| TISP43     | -0.238 | NA        | 3.290E-01 |
| CDH26      | -0.238 | 5.213E-01 | 1.010E-02 |
| MIR135B    | -0.238 | 7.619E-01 | 6.401E-01 |
| BSX        | -0.238 | 8.261E-01 | 3.168E-01 |
| CAMK1G     | -0.238 | 3.091E-01 | 8.321E-01 |
| KLHDC8A    | -0.239 | 3.572E-01 | 4.023E-01 |
| TAS2R38    | -0.239 | 5.989E-01 | 2.582E-01 |
| ID4        | -0.239 | 4.527E-01 | 1.094E-01 |
| SDR42E2    | -0.239 | 2.796E-01 | 3.913E-01 |
| CPN1       | -0.239 | 7.744E-01 | 7.969E-02 |
| SMLR1      | -0.239 | 7.185E-01 | 1.596E-03 |
| GTF3C6     | -0.239 | 8.336E-03 | 3.048E-01 |
| MIR4446    | -0.239 | NA        | 4.379E-01 |
| APIG2      | -0.239 | 5.858E-02 | 7.301E-02 |
| TRPA1      | -0.239 | 5.221E-01 | 5.946E-02 |
| SMN1       | -0.239 | 3.848E-03 | 9.040E-01 |
| VGLL2      | -0.239 | 8.206E-01 | 4.948E-01 |
| STIM2      | -0.239 | 5.712E-04 | 5.735E-01 |
| NPTX2      | -0.239 | 3.245E-01 | 3.106E-02 |
| HK2        | -0.240 | 1.443E-01 | 3.716E-02 |
| RPL35      | -0.240 | 4.958E-02 | 2.691E-01 |
| RPL18      | -0.240 | 3.923E-02 | 5.289E-01 |
| FAM13C     | -0.240 | 3.240E-01 | 2.997E-03 |
| CDC14B     | -0.240 | 2.359E-02 | 1.663E-04 |
| PORCN      | -0.240 | 7.948E-02 | 7.404E-01 |
| IL36A      | -0.240 | 8.337E-01 | 1.833E-01 |

|            |        |           |           |
|------------|--------|-----------|-----------|
| LYAR       | -0.240 | 2.204E-02 | 3.781E-01 |
| SLC17A9    | -0.240 | 3.705E-01 | 8.067E-02 |
| 4EM56-RWD  | -0.240 | 6.809E-02 | 2.732E-01 |
| PCNX2      | -0.240 | 6.807E-02 | 4.075E-03 |
| ASB17      | -0.240 | NA        | 1.214E-01 |
| KLHL17     | -0.240 | 7.797E-02 | 2.190E-01 |
| LTF        | -0.241 | 6.273E-01 | 3.310E-01 |
| KCNQ2      | -0.241 | 5.964E-01 | 3.385E-01 |
| NOP2       | -0.241 | 4.924E-03 | 6.903E-01 |
| AC026954.2 | -0.241 | 4.256E-01 | 8.551E-01 |
| IFIT3      | -0.241 | 4.080E-01 | 4.115E-01 |
| ZMAT4      | -0.241 | 6.860E-01 | 4.310E-01 |
| ZDHHC2     | -0.241 | 3.131E-01 | 2.231E-01 |
| HNRNPA1L2  | -0.241 | 4.441E-03 | 9.539E-02 |
| CSAD       | -0.241 | 1.603E-01 | 9.615E-02 |
| MIR34C     | -0.241 | NA        | 2.194E-01 |
| SERPINA1   | -0.241 | 5.551E-01 | 1.657E-01 |
| GTSF1      | -0.241 | 6.826E-01 | 1.672E-01 |
| AC010323.1 | -0.241 | 5.152E-01 | 1.525E-01 |
| SLC51A     | -0.242 | 1.994E-01 | 1.079E-01 |
| C18orf63   | -0.242 | NA        | 2.362E-02 |
| TUBE1      | -0.242 | 3.613E-03 | 2.010E-01 |
| CCDC94     | -0.242 | 8.189E-03 | 3.287E-01 |
| NLGN4X     | -0.242 | 5.412E-01 | 2.788E-02 |
| PDK1       | -0.242 | 5.107E-02 | 3.092E-01 |
| MIR3192    | -0.242 | 5.923E-01 | 3.987E-01 |
| SNCA       | -0.242 | 4.107E-01 | 2.148E-01 |
| YDJC       | -0.243 | 5.019E-02 | 1.963E-01 |
| OR2A2      | -0.243 | NA        | 2.688E-03 |
| P2RX3      | -0.243 | 6.783E-01 | 3.038E-01 |
| LPIN2      | -0.243 | 1.810E-01 | 1.190E-02 |
| LIX1       | -0.243 | 6.434E-01 | 3.659E-01 |
| GNB3       | -0.243 | 2.781E-01 | 2.452E-01 |
| SUN5       | -0.243 | NA        | 4.017E-01 |
| TCERG1     | -0.243 | 2.208E-03 | 1.127E-01 |
| GDF9       | -0.243 | 1.794E-01 | 3.006E-01 |
| MAGIX      | -0.243 | 3.391E-01 | 2.386E-02 |
| MIR3942    | -0.243 | 3.331E-01 | 1.004E-02 |
| ST8SIA4    | -0.243 | 2.086E-01 | 5.718E-01 |
| SELENOO    | -0.243 | 9.916E-03 | 1.169E-01 |
| BTG2       | -0.243 | 2.746E-01 | 9.656E-04 |
| C3orf84    | -0.243 | NA        | 4.717E-03 |
| LGR4       | -0.243 | 1.452E-01 | 6.462E-01 |
| IFNLR1     | -0.243 | 1.681E-01 | 5.875E-02 |
| GDF5OS     | -0.243 | 6.843E-01 | 4.738E-01 |
| ZBED6CL    | -0.243 | 2.278E-01 | 3.925E-01 |
| SLAIN1     | -0.243 | 3.987E-01 | 6.531E-04 |
| LZTS2      | -0.243 | 5.061E-03 | 2.242E-02 |
| TNFRSF13B  | -0.244 | 6.188E-01 | 1.260E-02 |
| TMC3       | -0.244 | 4.055E-01 | 4.494E-02 |

|            |        |           |           |
|------------|--------|-----------|-----------|
| ALG10B     | -0.244 | 3.943E-02 | 2.337E-01 |
| KLHL31     | -0.244 | 2.531E-01 | 3.684E-01 |
| ANKAR      | -0.244 | 1.252E-02 | 2.959E-01 |
| ANKS1B     | -0.244 | 4.966E-01 | 1.198E-01 |
| HEXDC      | -0.244 | 7.605E-02 | 2.181E-01 |
| SLC20A1    | -0.244 | 1.481E-01 | 3.127E-01 |
| MGST2      | -0.245 | 9.565E-02 | 6.489E-01 |
| CHST13     | -0.245 | 3.999E-01 | 7.049E-01 |
| MAPK10     | -0.245 | 3.038E-01 | 2.012E-03 |
| RBM19      | -0.245 | 2.951E-03 | 3.603E-01 |
| TMEM30B    | -0.245 | 1.211E-01 | 3.223E-01 |
| C1orf64    | -0.245 | 5.806E-01 | 4.772E-01 |
| UGT1A8     | -0.245 | 7.508E-01 | 2.969E-01 |
| AC006254.1 | -0.245 | 1.584E-01 | 4.362E-03 |
| TRMT5      | -0.245 | 6.793E-04 | 9.572E-03 |
| GPR155     | -0.245 | 1.978E-01 | 9.418E-02 |
| TUBB1      | -0.245 | 1.984E-01 | 5.813E-01 |
| CLEC18B    | -0.245 | 3.918E-01 | 4.710E-03 |
| MIR5581    | -0.245 | 4.968E-01 | 5.329E-02 |
| FZD5       | -0.245 | 1.485E-01 | 2.503E-01 |
| C5orf30    | -0.245 | 7.760E-02 | 2.699E-01 |
| CCL22      | -0.245 | 4.151E-01 | 7.062E-02 |
| GFRAL      | -0.245 | NA        | 5.194E-01 |
| GSAP       | -0.246 | 6.782E-02 | 1.110E-02 |
| BEST4      | -0.246 | 2.526E-01 | 2.666E-01 |
| TCF7L2     | -0.246 | 2.944E-02 | 1.346E-01 |
| ACOT12     | -0.246 | 6.663E-01 | 1.089E-01 |
| NDUFA11    | -0.246 | 3.578E-02 | 7.751E-02 |
| SMAD3      | -0.246 | 1.374E-01 | 4.017E-01 |
| LRRC75A    | -0.246 | 1.954E-01 | 1.962E-02 |
| COL28A1    | -0.246 | 4.425E-01 | 4.922E-01 |
| ZDHHC11    | -0.246 | 4.137E-01 | 6.449E-03 |
| BLOC1S1    | -0.246 | 5.853E-02 | 1.489E-02 |
| MYC        | -0.246 | 2.833E-01 | 8.847E-01 |
| GLDN       | -0.247 | 2.440E-01 | 7.755E-01 |
| IL1RAP     | -0.247 | 3.079E-01 | 7.153E-02 |
| PPIAL4F    | -0.247 | NA        | 4.854E-02 |
| ARHGEF16   | -0.247 | 1.615E-01 | 7.580E-01 |
| APOBEC2    | -0.247 | 4.137E-01 | 1.328E-02 |
| C8orf46    | -0.247 | 4.261E-01 | 3.893E-01 |
| SAAL1      | -0.247 | 3.552E-03 | 5.247E-02 |
| KRT25      | -0.247 | 7.477E-01 | 1.106E-01 |
| NDUFA7     | -0.248 | 4.003E-02 | 3.425E-01 |
| MIR4672    | -0.248 | NA        | 2.415E-01 |
| SPDYC      | -0.248 | 6.867E-01 | 2.131E-01 |
| CXorf57    | -0.248 | 4.027E-01 | 2.910E-01 |
| LY75       | -0.248 | 2.090E-01 | 2.175E-01 |
| SH2D3A     | -0.248 | 1.033E-01 | 3.489E-01 |
| SPTB       | -0.248 | 2.770E-01 | 2.461E-02 |
| CCDC74B    | -0.248 | 2.725E-01 | 2.298E-01 |

|            |        |           |           |
|------------|--------|-----------|-----------|
| MAGEA8     | -0.248 | 6.620E-01 | 3.742E-02 |
| KDM5D      | -0.248 | 6.549E-01 | 8.674E-03 |
| RPL37      | -0.248 | 3.148E-02 | 3.529E-01 |
| LEFTY1     | -0.248 | 4.997E-01 | 2.106E-01 |
| ANKRA2     | -0.248 | 1.141E-02 | 9.941E-02 |
| RFPL3S     | -0.248 | 2.668E-01 | 1.058E-01 |
| CSH1       | -0.248 | NA        | 1.641E-01 |
| CASP8      | -0.249 | 1.364E-02 | 1.722E-01 |
| ALKBH2     | -0.249 | 1.753E-02 | 1.144E-01 |
| ASB13      | -0.249 | 2.750E-02 | 2.335E-02 |
| NPEPL1     | -0.249 | 6.518E-02 | 6.252E-01 |
| POU4F3     | -0.249 | 3.238E-01 | 3.892E-01 |
| SLIRP      | -0.249 | 1.655E-02 | 3.604E-01 |
| RDH10      | -0.249 | 2.034E-01 | 2.411E-01 |
| DGAT1      | -0.249 | 2.077E-02 | 6.719E-01 |
| MIR93      | -0.249 | 4.593E-01 | 4.523E-01 |
| SERPINF2   | -0.249 | 3.558E-01 | 5.841E-02 |
| HAUS3      | -0.249 | 1.618E-03 | 3.989E-01 |
| PCED1B     | -0.249 | 1.532E-01 | 2.803E-01 |
| SPRN       | -0.249 | 9.390E-02 | 8.358E-02 |
| ZBTB32     | -0.249 | 2.327E-01 | 2.290E-01 |
| FAM187B    | -0.249 | 5.434E-01 | 3.392E-02 |
| ADM        | -0.250 | 2.824E-01 | 9.431E-02 |
| TRIM72     | -0.250 | 4.017E-01 | 6.254E-03 |
| CLK1       | -0.250 | 2.181E-02 | 1.650E-01 |
| KCNMB2     | -0.250 | 2.922E-01 | 3.625E-01 |
| AP002748.4 | -0.250 | NA        | 2.264E-01 |
| EPB42      | -0.250 | 2.396E-01 | 9.397E-01 |
| FAM209B    | -0.250 | 2.091E-01 | 4.086E-03 |
| HIST1H3F   | -0.250 | 4.475E-01 | 5.884E-03 |
| MCHR1      | -0.250 | 4.733E-01 | 2.082E-01 |
| USH2A      | -0.250 | 2.479E-01 | 2.784E-01 |
| HLA-DOB    | -0.251 | 3.918E-01 | 4.964E-01 |
| OGFRL1     | -0.251 | 2.483E-01 | 3.460E-01 |
| IL2RA      | -0.251 | 4.289E-01 | 1.172E-01 |
| SLC26A5    | -0.251 | 4.281E-01 | 5.735E-03 |
| MBIP       | -0.251 | 4.192E-02 | 4.921E-04 |
| GRAMD1B    | -0.251 | 2.869E-01 | 4.896E-02 |
| LAX1       | -0.251 | 4.475E-01 | 1.144E-02 |
| DCD        | -0.251 | NA        | 1.295E-01 |
| HNRNPCL2   | -0.251 | 6.374E-01 | 7.057E-01 |
| RPF2       | -0.251 | 7.465E-04 | 3.298E-01 |
| EQTN       | -0.251 | 4.078E-01 | 4.702E-03 |
| GABRG2     | -0.251 | 8.096E-01 | 1.346E-02 |
| MRPS31     | -0.251 | 4.214E-04 | 1.359E-01 |
| UGT2B4     | -0.251 | 7.472E-01 | 3.355E-01 |
| SLC16A8    | -0.251 | 3.348E-01 | 1.081E-01 |
| SLAMF1     | -0.251 | 4.111E-01 | 5.770E-01 |
| CCDC125    | -0.251 | 2.118E-02 | 3.872E-01 |
| COL6A5     | -0.252 | 5.853E-01 | 1.681E-01 |

|          |        |           |           |
|----------|--------|-----------|-----------|
| NPAS4    | -0.252 | 5.422E-01 | 5.048E-03 |
| FGR      | -0.252 | 1.629E-01 | 1.093E-01 |
| SNAPC1   | -0.252 | 5.399E-02 | 7.745E-01 |
| HGFAC    | -0.252 | 4.112E-01 | 1.686E-01 |
| MRPL12   | -0.252 | 5.546E-02 | 3.302E-01 |
| MOS      | -0.252 | NA        | 4.833E-01 |
| MAP1LC3C | -0.252 | 5.650E-01 | 8.825E-03 |
| ZNF778   | -0.252 | 1.205E-02 | 4.428E-02 |
| OR6S1    | -0.252 | NA        | 4.660E-05 |
| CATSPER2 | -0.253 | 1.412E-01 | 1.145E-01 |
| PLA2R1   | -0.253 | 1.665E-01 | 5.456E-02 |
| ZFC3H1   | -0.253 | 4.964E-03 | 2.688E-01 |
| GP9      | -0.253 | 6.960E-01 | 1.872E-02 |
| SULT1A2  | -0.253 | 5.316E-01 | 3.547E-02 |
| TOP1MT   | -0.253 | 3.809E-02 | 9.280E-01 |
| MFNG     | -0.253 | 2.192E-01 | 1.953E-01 |
| MIP      | -0.253 | 2.053E-01 | 2.304E-01 |
| GJB4     | -0.253 | 4.547E-01 | 3.055E-01 |
| IL10RA   | -0.253 | 3.438E-01 | 1.006E-02 |
| DLX2     | -0.253 | 5.651E-01 | 3.060E-01 |
| ANGPTL6  | -0.253 | 1.595E-01 | 3.244E-02 |
| BCL11B   | -0.253 | 3.317E-01 | 6.145E-03 |
| TBPL2    | -0.253 | 5.436E-01 | 2.577E-01 |
| ZDHHC8   | -0.253 | 1.351E-02 | 4.775E-02 |
| MAP9     | -0.253 | 2.986E-01 | 2.905E-01 |
| MMP25    | -0.254 | 2.558E-01 | 5.194E-03 |
| RPL14    | -0.254 | 3.077E-02 | 6.888E-01 |
| FASTKD1  | -0.254 | 1.608E-03 | 4.484E-01 |
| MYOT     | -0.254 | 3.685E-01 | 3.357E-01 |
| TMEM181  | -0.254 | 6.843E-03 | 6.005E-01 |
| FGL2     | -0.254 | 3.592E-01 | 1.183E-01 |
| DDX47    | -0.254 | 4.300E-02 | 1.047E-01 |
| WNT11    | -0.254 | 5.299E-01 | 4.620E-01 |
| TRAF1    | -0.254 | 1.637E-01 | 8.924E-02 |
| IL18BP   | -0.254 | 1.314E-01 | 5.882E-01 |
| MARS2    | -0.254 | 2.338E-02 | 4.024E-01 |
| MIR6722  | -0.254 | NA        | 8.038E-01 |
| PPWD1    | -0.255 | 5.783E-04 | 7.420E-01 |
| ELMOD1   | -0.255 | 5.141E-01 | 4.491E-02 |
| TSPO     | -0.255 | 8.071E-02 | 4.190E-02 |
| RFPL3    | -0.255 | 5.607E-01 | 1.114E-01 |
| SEMA4B   | -0.255 | 2.007E-01 | 2.346E-01 |
| C7orf34  | -0.255 | 5.942E-01 | 4.396E-02 |
| MT-ND5   | -0.255 | 2.843E-01 | 3.795E-01 |
| GPA33    | -0.255 | 4.450E-01 | 2.133E-02 |
| ZBTB9    | -0.255 | 2.696E-01 | 2.706E-01 |
| CTAGE9   | -0.255 | 4.571E-01 | 3.892E-01 |
| PBX4     | -0.255 | 1.878E-01 | 4.289E-01 |
| RGS18    | -0.256 | 3.250E-01 | 1.288E-01 |
| CLUL1    | -0.256 | 3.949E-01 | 1.079E-01 |

|            |        |           |           |
|------------|--------|-----------|-----------|
| C9         | -0.256 | 5.106E-01 | 9.418E-02 |
| ZNF30      | -0.256 | 4.402E-02 | 2.280E-01 |
| MIR4284    | -0.256 | 6.364E-01 | 8.688E-02 |
| RASL10B    | -0.256 | 3.894E-01 | 1.386E-01 |
| IFITM10    | -0.257 | 4.097E-01 | 3.648E-01 |
| AC010616.1 | -0.257 | 3.794E-01 | 4.425E-03 |
| UNC13C     | -0.257 | 7.396E-01 | 2.216E-01 |
| ALKBH7     | -0.257 | 5.426E-02 | 4.674E-03 |
| ZNF276     | -0.257 | 8.919E-03 | 2.695E-01 |
| SMIM15     | -0.257 | 3.500E-05 | 7.975E-01 |
| NPIPA3     | -0.257 | 4.463E-01 | 1.421E-01 |
| PSMB10     | -0.257 | 8.291E-02 | 1.035E-02 |
| CCDC182    | -0.257 | NA        | 8.611E-02 |
| HLA-F      | -0.257 | 3.315E-01 | 1.188E-02 |
| IGFL2      | -0.257 | 6.116E-01 | 6.761E-04 |
| DIMT1      | -0.257 | 2.370E-05 | 4.685E-01 |
| BIN2       | -0.257 | 3.003E-01 | 4.466E-02 |
| FAM174B    | -0.257 | 3.789E-01 | 6.784E-01 |
| GSDMB      | -0.257 | 2.440E-01 | 2.163E-01 |
| PRMT3      | -0.257 | 2.603E-03 | 3.006E-01 |
| AMY1A      | -0.257 | NA        | 7.412E-01 |
| SLCO1B1    | -0.258 | 6.802E-01 | 1.316E-02 |
| C2orf70    | -0.258 | 4.722E-01 | 6.602E-01 |
| CCNT2      | -0.258 | 2.849E-02 | 3.189E-01 |
| WDR97      | -0.258 | 1.841E-01 | 5.275E-01 |
| AC092821.1 | -0.258 | 1.668E-01 | 3.219E-01 |
| NLRC5      | -0.258 | 2.154E-01 | 1.519E-01 |
| SPATA13    | -0.258 | 8.846E-02 | 1.884E-03 |
| NDUFB8     | -0.258 | 1.389E-02 | 7.829E-04 |
| DNASE1     | -0.259 | 2.199E-02 | 1.083E-02 |
| MAS1       | -0.259 | 6.318E-01 | 1.072E-02 |
| COX4I1     | -0.259 | 1.736E-02 | 2.947E-01 |
| BTK        | -0.259 | 3.612E-01 | 5.578E-02 |
| SPACA1     | -0.259 | NA        | 1.949E-01 |
| AL662899.3 | -0.259 | 1.712E-01 | 1.860E-01 |
| AC008758.4 | -0.259 | 2.634E-01 | 1.913E-01 |
| IL1RAPL1   | -0.259 | 5.728E-01 | 1.497E-01 |
| MIR4730    | -0.259 | 5.152E-01 | 2.824E-01 |
| FLT1       | -0.259 | 1.116E-01 | 8.061E-01 |
| CCDC150    | -0.259 | 1.104E-01 | 2.709E-01 |
| PAK1       | -0.259 | 2.688E-02 | 4.235E-01 |
| HIST1H1A   | -0.259 | 7.598E-01 | 2.854E-01 |
| ZNF582     | -0.260 | 1.899E-01 | 1.412E-01 |
| RPS15      | -0.260 | 3.647E-02 | 2.859E-02 |
| TMC8       | -0.260 | 1.980E-01 | 2.102E-01 |
| SMPD3      | -0.260 | 2.173E-01 | 2.415E-01 |
| C6orf223   | -0.260 | 5.607E-01 | 5.844E-01 |
| FTMT       | -0.260 | 8.586E-01 | 2.913E-01 |
| C3orf22    | -0.260 | 7.528E-01 | 4.012E-02 |
| ASTN2      | -0.260 | 3.513E-01 | 2.710E-01 |

|            |        |           |           |
|------------|--------|-----------|-----------|
| CIITA      | -0.260 | 3.277E-01 | 9.188E-02 |
| PLGLB1     | -0.260 | 2.922E-01 | 3.541E-04 |
| ALS2CL     | -0.260 | 2.051E-01 | 9.542E-02 |
| TGIF2      | -0.260 | 3.359E-02 | 7.255E-01 |
| GLI1       | -0.260 | 3.399E-01 | 2.268E-01 |
| OR5AP2     | -0.260 | NA        | 1.242E-03 |
| NR2C1      | -0.260 | 4.225E-03 | 2.568E-01 |
| ZNF251     | -0.261 | 3.066E-02 | 3.424E-01 |
| ZNF223     | -0.261 | 9.109E-02 | 8.689E-04 |
| RPS6KA6    | -0.261 | 3.832E-01 | 2.291E-01 |
| RIMS2      | -0.261 | 4.876E-01 | 2.021E-01 |
| PXN        | -0.261 | 2.141E-02 | 5.067E-01 |
| FMNL2      | -0.261 | 1.782E-01 | 4.134E-01 |
| HIST1H2BH  | -0.261 | 3.989E-01 | 4.187E-01 |
| MIR6793    | -0.261 | 6.035E-01 | 2.431E-01 |
| TP53       | -0.261 | 5.858E-02 | 1.920E-01 |
| RAD54B     | -0.262 | 4.852E-02 | 9.081E-03 |
| PTPN6      | -0.262 | 6.005E-03 | 3.609E-01 |
| GRM5       | -0.262 | 6.927E-01 | 2.932E-01 |
| IRF9       | -0.262 | 6.777E-02 | 7.497E-02 |
| GBP1       | -0.262 | 3.462E-01 | 3.080E-01 |
| DNAH6      | -0.262 | 3.894E-01 | 2.851E-02 |
| TOR4A      | -0.262 | 1.832E-01 | 6.388E-02 |
| CD19       | -0.262 | 5.444E-01 | 6.250E-02 |
| MIR491     | -0.262 | NA        | 6.995E-02 |
| DLX3       | -0.262 | 4.765E-01 | 2.878E-01 |
| SOX30      | -0.262 | 4.384E-01 | 3.332E-01 |
| ZKSCAN7    | -0.263 | 2.057E-01 | 2.678E-01 |
| MTRF1      | -0.263 | 1.190E-02 | 3.911E-01 |
| CHD3       | -0.263 | 9.665E-03 | 4.582E-02 |
| ADGRA3     | -0.263 | 7.797E-02 | 1.525E-01 |
| MFSD10     | -0.263 | 1.947E-02 | 1.816E-01 |
| LCP2       | -0.263 | 2.510E-01 | 4.489E-01 |
| GGTLC3     | -0.263 | 7.778E-01 | 6.285E-03 |
| CDH23      | -0.263 | 4.150E-01 | 4.710E-01 |
| GRIN3A     | -0.263 | 1.827E-01 | 1.693E-01 |
| TAS2R30    | -0.263 | 4.492E-01 | 1.080E-01 |
| IL4I1      | -0.263 | 3.855E-01 | 1.662E-02 |
| AL357673.1 | -0.263 | 5.583E-01 | 3.070E-01 |
| GSTO1      | -0.263 | 2.978E-02 | 6.144E-02 |
| MIR1254-1  | -0.263 | 2.338E-01 | 4.006E-01 |
| IL17RB     | -0.264 | 2.157E-01 | 1.268E-01 |
| PATZ1      | -0.264 | 5.929E-02 | 2.336E-01 |
| CPO        | -0.264 | 3.809E-01 | 2.404E-01 |
| CRKL       | -0.264 | 2.659E-02 | 2.872E-01 |
| PIR        | -0.264 | 2.395E-01 | 4.971E-02 |
| MTCP1      | -0.264 | 9.471E-02 | 7.448E-04 |
| INSL3      | -0.264 | 1.620E-01 | 1.803E-01 |
| GSX1       | -0.264 | NA        | 3.924E-02 |
| HIST1H2BM  | -0.264 | 5.163E-01 | 1.467E-03 |

|           |        |           |           |
|-----------|--------|-----------|-----------|
| RTP3      | -0.264 | 7.932E-01 | 4.789E-01 |
| SLC23A2   | -0.264 | 1.565E-01 | 4.032E-01 |
| DDX58     | -0.264 | 2.051E-01 | 8.740E-04 |
| RGPD4     | -0.264 | 5.728E-01 | 8.125E-02 |
| FSTL4     | -0.265 | 4.976E-01 | 8.229E-01 |
| TARM1     | -0.265 | 6.757E-01 | 9.954E-03 |
| EFCAB3    | -0.265 | 6.288E-01 | 1.598E-01 |
| HLA-DQA2  | -0.265 | 4.931E-01 | 1.023E-03 |
| RHPN1     | -0.265 | 2.604E-01 | 1.104E-01 |
| B3GNT7    | -0.265 | 3.060E-01 | 2.132E-02 |
| TBX22     | -0.265 | NA        | 2.883E-01 |
| FAM83H    | -0.265 | 2.573E-02 | 1.270E-01 |
| MIR320E   | -0.265 | 2.101E-01 | 1.074E-01 |
| MIR643    | -0.265 | 5.360E-01 | 4.844E-01 |
| CEP85L    | -0.265 | 4.047E-02 | 1.532E-04 |
| MTRNR2L11 | -0.265 | 5.957E-01 | 4.638E-01 |
| CD80      | -0.265 | 4.010E-01 | 3.289E-01 |
| CD72      | -0.265 | 2.878E-01 | 1.489E-01 |
| FAM47A    | -0.265 | NA        | 1.633E-01 |
| PKD2L2    | -0.265 | 1.678E-01 | 1.020E-01 |
| ZACN      | -0.265 | 4.745E-02 | 1.283E-01 |
| HERC6     | -0.265 | 2.480E-01 | 2.775E-01 |
| RFTN1     | -0.266 | 1.393E-01 | 2.290E-01 |
| GCLC      | -0.266 | 2.308E-01 | 7.167E-01 |
| ZNF311    | -0.266 | 2.825E-01 | 4.569E-02 |
| FRK       | -0.266 | 8.445E-02 | 2.970E-03 |
| SOCS1     | -0.266 | 2.463E-01 | 9.171E-01 |
| C5orf63   | -0.266 | 8.837E-02 | 2.933E-01 |
| ABCA5     | -0.266 | 1.169E-01 | 2.859E-03 |
| CCDC14    | -0.266 | 3.468E-02 | 2.417E-01 |
| HDHD5     | -0.266 | 8.882E-04 | 1.433E-02 |
| PLXNB1    | -0.266 | 8.233E-02 | 2.972E-02 |
| ITGAE     | -0.266 | 9.223E-03 | 3.335E-01 |
| CYP2D6    | -0.267 | 1.777E-01 | 2.138E-01 |
| MIR6810   | -0.267 | NA        | 5.932E-02 |
| ALG1L2    | -0.267 | 1.663E-01 | 7.465E-01 |
| FAM156B   | -0.267 | 5.124E-01 | 1.353E-03 |
| CCDC154   | -0.267 | 2.601E-01 | 5.397E-01 |
| AKR1B10   | -0.267 | 6.353E-01 | 5.363E-01 |
| SLC29A4   | -0.267 | 3.614E-01 | 1.255E-01 |
| DSC2      | -0.267 | 4.388E-01 | 3.583E-01 |
| SHROOM1   | -0.267 | 2.187E-01 | 4.620E-01 |
| IP6K2     | -0.267 | 8.970E-03 | 3.183E-01 |
| MIR3181   | -0.267 | NA        | 3.380E-01 |
| DISP1     | -0.267 | 5.829E-02 | 6.621E-03 |
| ALOX12B   | -0.267 | 5.078E-01 | 1.710E-01 |
| CYP4X1    | -0.267 | 4.375E-01 | 5.165E-01 |
| ANAPC4    | -0.267 | 2.233E-03 | 5.018E-01 |
| ANGPTL7   | -0.267 | 6.073E-01 | 1.519E-02 |
| PNMA8C    | -0.268 | 6.920E-01 | 3.555E-01 |



|            |        |           |           |
|------------|--------|-----------|-----------|
| UBA7       | -0.268 | 8.434E-02 | 2.972E-01 |
| TNFRSF10D  | -0.268 | 1.984E-01 | 1.067E-01 |
| AC023509.3 | -0.268 | 6.956E-02 | 2.744E-01 |
| LZTR1      | -0.268 | 1.526E-02 | 1.218E-01 |
| ARSJ       | -0.268 | 3.932E-01 | 8.289E-03 |
| GFI1B      | -0.268 | 5.227E-01 | 3.014E-03 |
| DPPA4      | -0.268 | 4.622E-01 | 6.015E-01 |
| IFITM5     | -0.268 | 6.278E-01 | 3.279E-01 |
| TAS2R43    | -0.268 | 4.977E-01 | 7.082E-02 |
| SNRPF      | -0.268 | 8.287E-03 | 2.408E-01 |
| FAM50B     | -0.268 | 3.253E-01 | 1.632E-01 |
| OR1L8      | -0.269 | 4.646E-01 | 3.650E-01 |
| ORO7-PAM1  | -0.269 | 2.748E-01 | 7.065E-03 |
| HHLA2      | -0.269 | 6.082E-01 | 6.249E-01 |
| CARNS1     | -0.269 | 1.146E-01 | 6.480E-06 |
| FDXACB1    | -0.269 | 7.295E-03 | 6.276E-02 |
| PAPPA      | -0.269 | 3.970E-01 | 4.589E-02 |
| SOX2       | -0.269 | 5.943E-01 | 3.149E-02 |
| ATXN7L2    | -0.269 | 4.745E-02 | 4.903E-01 |
| AC069503.2 | -0.269 | 1.448E-01 | 1.089E-02 |
| FAM167A    | -0.269 | 3.199E-01 | 1.851E-01 |
| C22orf15   | -0.269 | 2.444E-01 | 2.849E-01 |
| CCNL2      | -0.269 | 7.002E-02 | 7.259E-02 |
| ATP5D      | -0.269 | 5.768E-02 | 2.861E-01 |
| IL12A      | -0.270 | 3.201E-01 | 9.615E-02 |
| CAMK1D     | -0.270 | 2.168E-01 | 4.418E-01 |
| CYSLTR2    | -0.270 | 3.277E-01 | 6.172E-01 |
| NMNAT3     | -0.270 | 3.006E-01 | 3.181E-03 |
| SKOR2      | -0.270 | NA        | 4.529E-01 |
| MRAP2      | -0.270 | 4.171E-01 | 1.440E-01 |
| TLX2       | -0.270 | 4.207E-01 | 1.802E-04 |
| MLC1       | -0.270 | 3.588E-01 | 2.203E-03 |
| ST20-MTHFS | -0.270 | 3.449E-01 | 9.459E-02 |
| ANO3       | -0.270 | 5.227E-01 | 3.013E-01 |
| NGFR       | -0.270 | 4.969E-01 | 3.825E-01 |
| CLEC20A    | -0.270 | NA        | 8.983E-02 |
| MIR4633    | -0.271 | NA        | 5.497E-02 |
| GRIP1      | -0.271 | 2.322E-01 | 3.757E-02 |
| PAX4       | -0.271 | NA        | 8.468E-03 |
| MIR4664    | -0.271 | 2.556E-01 | 1.806E-02 |
| MC5R       | -0.271 | 6.769E-01 | 2.600E-01 |
| MCCD1      | -0.271 | NA        | 4.250E-01 |
| PKIA       | -0.271 | 3.001E-01 | 3.642E-01 |
| RIMBP3C    | -0.271 | 4.871E-01 | 1.124E-01 |
| ECHDC2     | -0.271 | 4.741E-02 | 8.890E-02 |
| RGPD1      | -0.272 | 5.315E-01 | 2.729E-02 |
| SLC25A48   | -0.272 | 4.949E-01 | 2.430E-03 |
| AC009119.2 | -0.272 | 1.643E-01 | 1.651E-01 |
| ENAM       | -0.272 | 5.248E-01 | 1.013E-02 |
| CD320      | -0.272 | 1.938E-01 | 6.956E-03 |

|                        |        |           |           |
|------------------------|--------|-----------|-----------|
| C8orf82                | -0.272 | 9.007E-03 | 1.125E-01 |
| MFSD3                  | -0.272 | 3.515E-02 | 1.190E-05 |
| SEC14L5                | -0.272 | 3.355E-01 | 3.078E-01 |
| CABP4                  | -0.272 | 3.631E-01 | 1.236E-04 |
| FAM184B                | -0.272 | 9.109E-02 | 1.040E-03 |
| MYO1A                  | -0.272 | 3.475E-01 | 2.377E-02 |
| FGA                    | -0.272 | 8.046E-01 | 4.718E-01 |
| TOPAZ1                 | -0.272 | 7.381E-01 | 6.713E-02 |
| PPIAL4G                | -0.272 | 5.080E-01 | 2.541E-01 |
| PRAP1                  | -0.272 | 6.095E-01 | 1.401E-01 |
| CRACR2A                | -0.272 | 1.672E-01 | 9.956E-02 |
| AKAP5                  | -0.272 | 1.530E-01 | 2.780E-01 |
| SERPIN5                | -0.273 | 4.058E-01 | 1.104E-02 |
| KBTBD6                 | -0.273 | 4.243E-03 | 1.910E-01 |
| MIR101-2               | -0.273 | NA        | 5.981E-02 |
| TSLP                   | -0.273 | 2.769E-01 | 3.268E-01 |
| CAPN15                 | -0.273 | 2.157E-03 | 2.960E-01 |
| ERMARD                 | -0.273 | 4.363E-03 | 4.783E-01 |
| RCBTB2                 | -0.273 | 2.978E-02 | 1.235E-01 |
| RPL4                   | -0.273 | 9.499E-03 | 4.585E-01 |
| SSX2                   | -0.273 | 8.513E-01 | 7.095E-02 |
| MAST3                  | -0.273 | 6.270E-03 | 5.483E-01 |
| BHD14A-AC <sup>1</sup> | -0.273 | 1.235E-01 | 4.218E-01 |
| MIR548P                | -0.273 | NA        | 1.427E-01 |
| LRRC49                 | -0.273 | 9.109E-02 | 1.363E-01 |
| SNCB                   | -0.273 | 5.038E-01 | 8.317E-02 |
| TAF4B                  | -0.273 | 1.522E-01 | 3.656E-01 |
| GLYATL3                | -0.273 | NA        | 2.592E-01 |
| OCIAD2                 | -0.274 | 1.666E-02 | 1.329E-04 |
| XCL2                   | -0.274 | 2.693E-01 | 2.035E-02 |
| PROCR                  | -0.274 | 1.665E-01 | 3.738E-01 |
| RAG1                   | -0.274 | 2.960E-01 | 3.672E-01 |
| KIF21A                 | -0.274 | 5.457E-02 | 6.192E-02 |
| ODF2L                  | -0.274 | 6.387E-03 | 8.183E-03 |
| AC008560.1             | -0.274 | 1.073E-03 | 1.048E-02 |
| BMP5                   | -0.274 | 5.680E-01 | 2.330E-05 |
| NOXA1                  | -0.274 | 2.096E-01 | 8.096E-02 |
| MIER3                  | -0.274 | 3.822E-03 | 1.096E-01 |
| AL365232.1             | -0.274 | NA        | 6.833E-01 |
| GLYCTK                 | -0.274 | 3.647E-02 | 7.071E-02 |
| DDTL                   | -0.274 | 4.994E-02 | 3.500E-01 |
| PGF                    | -0.275 | 2.569E-01 | 3.538E-01 |
| PLEKHG7                | -0.275 | 4.555E-01 | 4.072E-02 |
| SLC26A4                | -0.275 | 2.815E-01 | 5.923E-01 |
| GRIA4                  | -0.275 | 3.826E-01 | 6.241E-02 |
| ZNF841                 | -0.275 | 1.091E-01 | 4.497E-02 |
| CENPW                  | -0.275 | 1.009E-01 | 8.115E-01 |
| SCHIP1                 | -0.275 | 1.207E-01 | 3.403E-02 |
| ING5                   | -0.275 | 1.690E-03 | 5.495E-01 |
| CLECL1                 | -0.275 | 3.618E-01 | 2.910E-01 |

|             |        |           |           |
|-------------|--------|-----------|-----------|
| C6orf229    | -0.275 | 6.552E-01 | 4.542E-01 |
| TPTE2       | -0.275 | 3.617E-01 | 2.098E-01 |
| ADRB1       | -0.275 | 4.634E-01 | 4.631E-01 |
| TRAF3IP2    | -0.275 | 1.112E-02 | 1.660E-01 |
| AC040162.1  | -0.276 | 4.851E-02 | 1.101E-03 |
| DACH1       | -0.276 | 3.743E-01 | 9.979E-02 |
| THAP7       | -0.276 | 2.279E-02 | 4.034E-01 |
| B3GNT8      | -0.276 | 1.335E-01 | 1.529E-01 |
| KRTAP4-4    | -0.276 | NA        | 7.547E-01 |
| XKR4        | -0.276 | 5.436E-01 | 8.372E-02 |
| GOLGA8N     | -0.276 | 1.788E-01 | 1.375E-01 |
| MIR4480     | -0.276 | NA        | 1.998E-01 |
| RGS17       | -0.276 | 2.706E-01 | 6.580E-01 |
| GPRC5C      | -0.276 | 3.106E-01 | 5.020E-03 |
| ECT2L       | -0.276 | 7.355E-02 | 1.516E-01 |
| GPR82       | -0.276 | 2.847E-01 | 1.218E-01 |
| FCRL5       | -0.276 | 5.340E-01 | 8.255E-01 |
| CRTC1       | -0.276 | 3.691E-03 | 5.572E-02 |
| NF559-ZNF17 | -0.276 | 2.044E-01 | 4.011E-04 |
| GAL3ST3     | -0.276 | 6.504E-01 | 1.268E-02 |
| TBC1D3I     | -0.277 | 6.726E-01 | 2.283E-01 |
| LPIN3       | -0.277 | 5.331E-02 | 2.399E-02 |
| RCSD1       | -0.277 | 2.556E-01 | 3.733E-01 |
| RAC2        | -0.277 | 1.966E-01 | 2.964E-01 |
| TRIM25      | -0.277 | 8.072E-03 | 2.922E-02 |
| HAO2        | -0.277 | 5.260E-01 | 2.932E-01 |
| C10orf71    | -0.277 | 7.805E-01 | 2.807E-03 |
| RNASE8      | -0.277 | NA        | 2.000E-01 |
| TEKT3       | -0.277 | 3.418E-01 | 5.033E-02 |
| CHRM4       | -0.277 | 2.742E-01 | 1.946E-01 |
| GPR18       | -0.277 | 2.498E-01 | 4.842E-01 |
| SPANXN5     | -0.277 | NA        | 2.996E-01 |
| SPINK1      | -0.278 | 6.454E-01 | 2.104E-03 |
| SEC16B      | -0.278 | 2.288E-01 | 4.118E-01 |
| TTLL13P     | -0.278 | 1.130E-01 | 1.575E-01 |
| GPS2        | -0.278 | 3.647E-02 | 7.534E-02 |
| NF103-CHMI  | -0.278 | 1.561E-01 | 2.331E-03 |
| CD300LD     | -0.278 | 7.395E-01 | 7.305E-02 |
| OR2W3       | -0.279 | 6.356E-01 | 7.547E-02 |
| L36A-HNRNF  | -0.279 | 2.396E-01 | 2.924E-01 |
| KRTAP19-3   | -0.279 | NA        | 1.398E-01 |
| CR1         | -0.279 | 4.695E-01 | 4.668E-01 |
| KCNE3       | -0.279 | 2.082E-01 | 1.567E-01 |
| HVCN1       | -0.279 | 1.007E-01 | 3.243E-01 |
| C8orf44     | -0.279 | 1.447E-02 | 2.038E-01 |
| ANKRD22     | -0.279 | 2.171E-01 | 4.871E-04 |
| AC134669.2  | -0.279 | 5.066E-01 | 5.945E-03 |
| DENND2D     | -0.280 | 7.663E-02 | 4.739E-01 |
| APOBEC3A    | -0.280 | 4.715E-01 | 8.131E-02 |
| FOS         | -0.280 | 2.393E-01 | 2.616E-02 |

|            |        |           |           |
|------------|--------|-----------|-----------|
| RPS18      | -0.280 | 1.134E-02 | 4.758E-02 |
| CCR4       | -0.280 | 3.735E-01 | 8.899E-01 |
| DUXA       | -0.280 | NA        | 1.777E-02 |
| FOXI3      | -0.280 | 7.508E-01 | 3.809E-02 |
| RPL32      | -0.280 | 3.742E-02 | 1.642E-01 |
| IFNGR1     | -0.280 | 1.754E-02 | 1.664E-02 |
| PMAIP1     | -0.280 | 1.835E-01 | 5.833E-01 |
| PRAMEF17   | -0.280 | NA        | 2.127E-01 |
| DSG1       | -0.280 | 6.096E-01 | 7.999E-01 |
| GAPT       | -0.280 | 3.322E-01 | 9.522E-02 |
| SERGEF     | -0.280 | 1.054E-02 | 3.339E-01 |
| C19orf81   | -0.280 | 5.839E-01 | 1.174E-01 |
| LGALS7B    | -0.281 | 6.513E-01 | 1.733E-01 |
| SLCO1B3    | -0.281 | 7.659E-01 | 1.842E-01 |
| SLC47A1    | -0.281 | 3.739E-01 | 6.198E-01 |
| USP35      | -0.281 | 1.613E-02 | 1.610E-01 |
| AJUBA      | -0.281 | 1.349E-01 | 8.672E-02 |
| TMEM129    | -0.281 | 1.348E-02 | 4.470E-02 |
| GINS3      | -0.281 | 1.989E-02 | 4.383E-03 |
| GLT1D1     | -0.281 | 3.287E-01 | 1.481E-01 |
| CCDC173    | -0.282 | 1.802E-01 | 1.327E-01 |
| SMPD2      | -0.282 | 8.668E-03 | 1.979E-01 |
| AVPI1      | -0.282 | 1.234E-01 | 1.070E-01 |
| WAS        | -0.282 | 2.569E-01 | 5.504E-02 |
| CEP290     | -0.282 | 1.520E-02 | 8.361E-02 |
| NFE4       | -0.282 | 5.559E-01 | 5.398E-01 |
| P2RY13     | -0.282 | 3.521E-01 | 9.187E-03 |
| ANKRD62    | -0.282 | 5.689E-01 | 8.612E-01 |
| AC092073.1 | -0.282 | 4.929E-01 | 1.450E-01 |
| TTLL3      | -0.282 | 1.477E-01 | 1.696E-01 |
| CYB5D1     | -0.282 | 2.851E-02 | 5.301E-01 |
| GFRA4      | -0.283 | NA        | 1.556E-01 |
| HOXA9      | -0.283 | 3.845E-01 | 1.410E-01 |
| OLAH       | -0.283 | 3.856E-01 | 2.025E-01 |
| HOXA5      | -0.283 | 1.937E-01 | 1.324E-02 |
| TMCO6      | -0.283 | 1.117E-03 | 1.082E-01 |
| AGAP6      | -0.283 | 3.885E-02 | 5.447E-01 |
| UBE2U      | -0.283 | 7.793E-01 | 4.936E-01 |
| TAS2R4     | -0.283 | 1.738E-01 | 1.222E-02 |
| MIR4269    | -0.283 | 7.732E-01 | 1.078E-01 |
| TFB1M      | -0.283 | 6.574E-04 | 1.222E-02 |
| RIC3       | -0.283 | 4.444E-01 | 3.293E-04 |
| TAS2R19    | -0.283 | 1.454E-01 | 8.194E-03 |
| KIAA0922   | -0.283 | 1.374E-01 | 1.419E-01 |
| GRIA3      | -0.283 | 3.600E-01 | 2.849E-03 |
| THEM4      | -0.283 | 4.300E-02 | 2.409E-01 |
| RAB40A     | -0.283 | 8.842E-02 | 1.116E-02 |
| C16orf45   | -0.283 | 1.814E-01 | 5.090E-01 |
| HIF1A      | -0.284 | 5.373E-02 | 1.712E-01 |
| TMEM217    | -0.284 | 6.743E-02 | 3.874E-01 |

|          |        |           |           |
|----------|--------|-----------|-----------|
| PLCZ1    | -0.284 | 7.277E-01 | 4.616E-02 |
| TMEM63C  | -0.284 | 4.820E-01 | 1.606E-01 |
| MIR5091  | -0.284 | 5.964E-01 | 7.142E-01 |
| NLRP8    | -0.284 | NA        | 8.650E-02 |
| ZGRF1    | -0.284 | 1.834E-02 | 8.368E-02 |
| ZPBP2    | -0.284 | 6.338E-01 | 5.349E-04 |
| FAM86B2  | -0.284 | 2.960E-01 | 1.957E-01 |
| S100P    | -0.284 | 4.076E-01 | 3.787E-01 |
| RPL8     | -0.284 | 8.563E-03 | 3.051E-02 |
| DPPA5    | -0.284 | 8.215E-01 | 2.340E-02 |
| KIF2B    | -0.285 | NA        | 2.984E-02 |
| LRRC24   | -0.285 | 6.340E-01 | 3.569E-01 |
| TNFRSF14 | -0.285 | 4.299E-02 | 1.945E-01 |
| KRTAP9-2 | -0.285 | NA        | 2.691E-01 |
| APBB3    | -0.285 | 9.462E-03 | 3.177E-01 |
| FPR3     | -0.285 | 3.481E-01 | 3.661E-02 |
| CCDC62   | -0.285 | 1.132E-01 | 3.889E-02 |
| DUOX1    | -0.285 | 2.034E-01 | 2.283E-01 |
| NT5DC4   | -0.285 | 2.156E-01 | 4.403E-01 |
| KRT73    | -0.285 | 6.431E-01 | 9.065E-02 |
| CD180    | -0.285 | 3.437E-01 | 2.801E-02 |
| MIR659   | -0.285 | 2.269E-01 | 2.289E-01 |
| PSD4     | -0.286 | 2.910E-02 | 2.536E-01 |
| GJB6     | -0.286 | 4.312E-01 | 9.793E-02 |
| ZFHX2    | -0.286 | 1.657E-01 | 3.579E-01 |
| SELENBP1 | -0.286 | 2.961E-01 | 4.266E-01 |
| MDM2     | -0.286 | 2.216E-01 | 4.976E-01 |
| NDRG1    | -0.286 | 2.190E-01 | 5.807E-01 |
| TREML1   | -0.286 | 2.444E-01 | 3.352E-01 |
| RPS28    | -0.286 | 2.495E-02 | 6.279E-02 |
| FOXB1    | -0.287 | 5.953E-01 | 1.301E-02 |
| CABS1    | -0.287 | NA        | 4.494E-01 |
| WDR66    | -0.287 | 3.942E-01 | 1.224E-01 |
| KRT71    | -0.287 | 5.533E-01 | 1.739E-01 |
| GUCA1B   | -0.287 | 9.883E-02 | 2.036E-01 |
| RPS23    | -0.287 | 4.412E-03 | 2.857E-03 |
| KIAA0141 | -0.287 | 7.540E-05 | 5.358E-01 |
| PRM1     | -0.287 | NA        | 2.361E-01 |
| CFHR4    | -0.287 | 6.020E-01 | 5.479E-03 |
| FCHSD1   | -0.288 | 6.176E-03 | 7.626E-02 |
| PAN2     | -0.288 | 5.449E-02 | 1.770E-01 |
| CCDC140  | -0.288 | 8.248E-01 | 4.494E-01 |
| TUBAL3   | -0.288 | 4.838E-01 | 3.859E-02 |
| GCH1     | -0.288 | 7.804E-03 | 1.441E-03 |
| PARP8    | -0.288 | 2.402E-02 | 1.714E-01 |
| MIR455   | -0.288 | NA        | 3.128E-02 |
| BMX      | -0.288 | 2.473E-01 | 6.130E-02 |
| CD40LG   | -0.288 | 3.736E-01 | 7.845E-02 |
| SLC6A18  | -0.288 | 8.423E-01 | 1.258E-01 |
| RPL12    | -0.288 | 8.649E-03 | 2.216E-02 |

|            |        |           |           |
|------------|--------|-----------|-----------|
| SSH3       | -0.288 | 1.248E-01 | 2.438E-01 |
| KBTBD11    | -0.288 | 2.760E-01 | 2.812E-03 |
| WFIKKN1    | -0.288 | 3.299E-01 | 6.670E-01 |
| IL13       | -0.288 | 4.526E-01 | 1.580E-01 |
| PCDH11X    | -0.288 | 6.020E-01 | 2.342E-02 |
| CCDC185    | -0.289 | 4.709E-01 | 3.297E-01 |
| RPL27A     | -0.289 | 9.355E-03 | 5.700E-05 |
| CARD11     | -0.289 | 1.983E-01 | 2.793E-01 |
| VWA8       | -0.289 | 2.139E-02 | 3.573E-02 |
| ORAI3      | -0.289 | 4.884E-02 | 4.749E-04 |
| KLHL23     | -0.289 | 6.409E-02 | 1.929E-01 |
| SEC31B     | -0.289 | 9.042E-02 | 1.151E-01 |
| SDR42E1    | -0.290 | 2.715E-01 | 3.314E-01 |
| KLHL30     | -0.290 | 2.624E-01 | 1.934E-01 |
| ISG15      | -0.290 | 2.511E-01 | 4.509E-02 |
| SAMD9      | -0.290 | 2.956E-01 | 1.540E-01 |
| CFC1       | -0.290 | NA        | 7.416E-04 |
| ARL17B     | -0.290 | 1.122E-01 | 1.363E-02 |
| TMEM225    | -0.290 | NA        | 3.198E-01 |
| AC119396.1 | -0.290 | 3.006E-01 | 2.407E-01 |
| LRCOL1     | -0.291 | 4.358E-01 | 1.251E-02 |
| TPT1       | -0.291 | 4.887E-03 | 3.176E-02 |
| PCDHAC2    | -0.291 | 5.208E-01 | 1.040E-01 |
| KLF13      | -0.291 | 7.656E-02 | 4.140E-01 |
| RPL37A     | -0.291 | 1.070E-02 | 1.163E-01 |
| PPP1R2P9   | -0.291 | NA        | 5.066E-01 |
| IL12RB1    | -0.291 | 3.295E-01 | 3.669E-02 |
| CTSW       | -0.291 | 2.348E-01 | 1.672E-02 |
| DEFB123    | -0.291 | NA        | 8.363E-03 |
| OR10J1     | -0.291 | NA        | 2.541E-01 |
| CYSLTR1    | -0.292 | 2.078E-01 | 3.612E-01 |
| ZNF195     | -0.292 | 7.804E-03 | 7.891E-01 |
| C2orf83    | -0.292 | 6.030E-01 | 8.198E-02 |
| SNX20      | -0.292 | 2.914E-01 | 5.600E-05 |
| FAM169A    | -0.292 | 1.795E-01 | 1.175E-01 |
| XDH        | -0.292 | 3.189E-01 | 7.675E-02 |
| LIMCH1     | -0.292 | 2.044E-01 | 9.707E-04 |
| ITGB4      | -0.292 | 1.237E-01 | 5.967E-02 |
| CCL3L1     | -0.292 | 3.482E-01 | 2.560E-06 |
| KCNA3      | -0.292 | 3.578E-01 | 6.086E-01 |
| MIR1295A   | -0.292 | NA        | 2.138E-01 |
| DYTN       | -0.292 | NA        | 2.269E-01 |
| VSTM5      | -0.292 | 3.376E-01 | 3.545E-01 |
| C1orf146   | -0.293 | 2.284E-01 | 9.881E-02 |
| USP17L7    | -0.293 | 7.296E-01 | 1.714E-03 |
| GOLGA8R    | -0.293 | 2.244E-01 | 2.511E-01 |
| HIGD2A     | -0.293 | 4.774E-03 | 1.208E-01 |
| AGXT       | -0.293 | 6.610E-01 | 1.295E-01 |
| MYL5       | -0.293 | 4.926E-02 | 2.375E-02 |
| HOXD13     | -0.294 | 5.270E-01 | 9.228E-02 |

|             |        |           |           |
|-------------|--------|-----------|-----------|
| HBEGF       | -0.294 | 1.835E-01 | 9.292E-02 |
| CTSH        | -0.294 | 1.479E-01 | 1.397E-01 |
| ST6GAL1     | -0.294 | 2.317E-01 | 6.218E-01 |
| LCAT        | -0.294 | 8.662E-02 | 4.268E-01 |
| PRLH        | -0.294 | NA        | 1.107E-01 |
| NR5A2       | -0.294 | 1.170E-01 | 5.765E-01 |
| ST3GAL1     | -0.294 | 9.216E-02 | 8.221E-02 |
| PTHLH       | -0.295 | 5.102E-01 | 4.516E-01 |
| SYT16       | -0.295 | 4.331E-01 | 3.669E-02 |
| CDH4        | -0.295 | 2.763E-01 | 3.747E-01 |
| TMEM150B    | -0.295 | 3.982E-01 | 1.340E-01 |
| GOLGA6L6    | -0.295 | 8.228E-01 | 1.255E-01 |
| AHRR        | -0.295 | 1.964E-01 | 1.373E-01 |
| ALPL        | -0.295 | 1.554E-01 | 6.944E-03 |
| GIMAP6      | -0.295 | 1.026E-01 | 2.425E-01 |
| SGSM2       | -0.295 | 1.904E-02 | 2.606E-01 |
| DAZ4        | -0.295 | NA        | 1.826E-01 |
| ME3         | -0.295 | 1.076E-01 | 2.340E-05 |
| SPAG17      | -0.296 | 3.842E-01 | 9.892E-03 |
| PRIMA1      | -0.296 | 4.903E-01 | 2.088E-01 |
| RHOXF1      | -0.297 | 3.864E-01 | 3.987E-02 |
| ABCA9       | -0.297 | 3.740E-01 | 7.750E-02 |
| OGT         | -0.297 | 2.295E-02 | 3.868E-02 |
| TFAP2E      | -0.297 | 1.786E-01 | 5.477E-02 |
| ID2         | -0.297 | 1.513E-01 | 2.578E-02 |
| ZNF705G     | -0.297 | NA        | 8.572E-02 |
| ATRNL1      | -0.298 | 3.949E-01 | 2.934E-03 |
| CRTAM       | -0.298 | 3.411E-01 | 9.268E-04 |
| PDPN        | -0.298 | 2.986E-01 | 3.722E-02 |
| SYCE3       | -0.298 | 1.675E-01 | 1.776E-01 |
| RPL29       | -0.298 | 1.362E-02 | 2.343E-01 |
| MIR7851     | -0.298 | 4.419E-01 | 5.636E-03 |
| AL365214.3  | -0.298 | NA        | 1.170E-05 |
| SPATA31A3   | -0.298 | NA        | 3.693E-03 |
| TUBGCP6     | -0.298 | 2.078E-03 | 5.214E-03 |
| DUSP6       | -0.298 | 1.073E-01 | 2.658E-01 |
| KIZ         | -0.299 | 3.558E-02 | 1.639E-01 |
| LRRC7       | -0.299 | 1.076E-01 | 7.996E-02 |
| GNAI1       | -0.299 | 9.197E-02 | 2.930E-01 |
| LAP3        | -0.299 | 6.004E-02 | 1.535E-02 |
| THSD1       | -0.299 | 1.876E-01 | 5.304E-01 |
| TRAF3IP3    | -0.299 | 2.079E-01 | 5.755E-02 |
| FBXO40      | -0.299 | 5.018E-01 | 2.910E-01 |
| VP23C-CDR1  | -0.299 | 8.454E-02 | 6.932E-01 |
| RB1         | -0.299 | 2.735E-02 | 3.908E-01 |
| SENP3-EIF4A | -0.299 | 9.045E-02 | 3.078E-02 |
| HIST1H4J    | -0.300 | 2.461E-01 | 1.177E-01 |
| RTP2        | -0.300 | 6.387E-01 | 1.095E-02 |
| ABHD14A     | -0.300 | 4.254E-02 | 4.211E-02 |
| LOXL1       | -0.300 | 1.729E-01 | 8.777E-02 |

|             |        |           |           |
|-------------|--------|-----------|-----------|
| FRY         | -0.300 | 1.781E-01 | 4.282E-01 |
| DGKH        | -0.300 | 4.852E-02 | 8.986E-03 |
| THRSP       | -0.300 | 6.151E-01 | 1.360E-02 |
| A1CF        | -0.300 | 5.277E-01 | 4.883E-03 |
| DNAJB7      | -0.300 | 1.284E-01 | 1.062E-01 |
| WDR72       | -0.301 | 3.770E-01 | 5.135E-02 |
| MIR6503     | -0.301 | 5.819E-01 | 5.057E-01 |
| MMD2        | -0.301 | NA        | 5.858E-02 |
| ENTPD3      | -0.301 | 3.125E-01 | 2.501E-01 |
| SH3BP1      | -0.301 | 3.982E-02 | 2.354E-01 |
| SERPINE3    | -0.301 | 1.867E-01 | 2.032E-01 |
| MIR5587     | -0.301 | 3.628E-01 | 1.165E-04 |
| SREK1IP1    | -0.301 | 1.690E-03 | 2.271E-02 |
| TENM4       | -0.301 | 2.453E-01 | 3.355E-01 |
| RAB3B       | -0.301 | 3.422E-01 | 8.119E-02 |
| VPREB1      | -0.302 | NA        | 9.437E-02 |
| ICAM2       | -0.302 | 9.606E-02 | 1.735E-01 |
| PDE8B       | -0.302 | 8.905E-02 | 1.140E-01 |
| RPL36       | -0.302 | 1.690E-02 | 6.105E-01 |
| PCSK5       | -0.302 | 2.627E-01 | 4.019E-04 |
| RAPGEF3     | -0.302 | 1.224E-01 | 1.597E-03 |
| FAM117B     | -0.302 | 3.615E-03 | 1.870E-04 |
| TRABD       | -0.302 | 2.277E-03 | 9.931E-02 |
| POU3F2      | -0.302 | 4.762E-01 | 1.605E-01 |
| PPIAL4A     | -0.302 | 2.558E-01 | 6.796E-04 |
| PHOSPHO2    | -0.302 | 6.012E-03 | 5.982E-02 |
| TMEM91      | -0.303 | 1.006E-01 | 7.732E-02 |
| PLAG1       | -0.303 | 1.938E-01 | 4.417E-03 |
| BPIFB3      | -0.303 | NA        | 4.530E-01 |
| NAPRT       | -0.303 | 4.560E-02 | 3.465E-01 |
| AC233724.12 | -0.303 | NA        | 8.255E-02 |
| MBP         | -0.303 | 1.949E-02 | 4.130E-01 |
| RAB7B       | -0.303 | 2.316E-01 | 8.600E-05 |
| PPP4R3CP    | -0.303 | 8.041E-01 | 2.445E-01 |
| HIBCH       | -0.303 | 3.463E-03 | 1.071E-01 |
| ADAD1       | -0.304 | NA        | 2.340E-01 |
| SCUBE1      | -0.304 | 2.671E-01 | 4.078E-01 |
| ALOXE3      | -0.304 | 3.678E-01 | 1.087E-01 |
| AC138969.1  | -0.304 | 6.424E-02 | 3.877E-03 |
| AC005154.6  | -0.304 | 4.075E-01 | 1.532E-01 |
| CDH3        | -0.304 | 3.215E-01 | 1.494E-01 |
| NADSYN1     | -0.304 | 5.114E-02 | 1.144E-01 |
| LRP4        | -0.304 | 1.380E-01 | 9.165E-02 |
| RTL5        | -0.305 | 1.995E-01 | 3.269E-01 |
| MPC1L       | -0.305 | 5.621E-01 | 3.601E-04 |
| MIR8071-2   | -0.305 | 6.049E-01 | 1.279E-01 |
| AWAT1       | -0.305 | NA        | 2.669E-02 |
| ADAM2       | -0.305 | 6.940E-01 | 4.192E-02 |
| MT-ND6      | -0.305 | 1.891E-01 | 1.089E-01 |
| ZNF215      | -0.305 | 1.984E-01 | 3.091E-01 |



|          |        |           |           |
|----------|--------|-----------|-----------|
| C1QL4    | -0.305 | 4.906E-01 | 7.573E-01 |
| FAM47B   | -0.305 | NA        | 2.516E-02 |
| DGKQ     | -0.305 | 1.653E-03 | 1.343E-01 |
| CLU      | -0.306 | 3.422E-01 | 1.659E-01 |
| ARHGEF28 | -0.306 | 8.702E-02 | 3.549E-03 |
| DMBX1    | -0.306 | 4.818E-01 | 5.180E-02 |
| MIR6870  | -0.306 | 6.585E-01 | 3.830E-05 |
| CA2      | -0.306 | 3.459E-01 | 5.727E-01 |
| THBD     | -0.306 | 2.841E-01 | 7.717E-02 |
| MIF      | -0.306 | 1.504E-02 | 2.521E-01 |
| SYK      | -0.306 | 6.057E-02 | 2.135E-02 |
| FSCN1    | -0.306 | 1.454E-01 | 2.502E-02 |
| G6PC2    | -0.306 | 6.686E-01 | 1.701E-01 |
| CST7     | -0.306 | 2.583E-01 | 1.987E-01 |
| IFI27    | -0.306 | 3.316E-01 | 3.213E-01 |
| SLC36A3  | -0.306 | 4.931E-01 | 4.831E-02 |
| ARMC12   | -0.307 | 2.921E-01 | 1.815E-01 |
| SPATC1   | -0.307 | 2.463E-01 | 6.225E-02 |
| CCDC24   | -0.307 | 2.500E-02 | 2.963E-03 |
| SHC4     | -0.307 | 1.788E-01 | 5.631E-01 |
| LRGUK    | -0.307 | 1.947E-01 | 5.797E-01 |
| TLR6     | -0.307 | 2.349E-01 | 3.389E-01 |
| RAD21L1  | -0.307 | 5.696E-01 | 1.712E-01 |
| TCP11X2  | -0.307 | NA        | 1.272E-01 |
| SH3TC1   | -0.307 | 8.054E-02 | 6.925E-01 |
| ZFPM1    | -0.308 | 5.848E-03 | 6.642E-01 |
| TKTL2    | -0.308 | 4.805E-01 | 1.968E-01 |
| CD200R1  | -0.308 | 1.510E-01 | 1.767E-03 |
| MIRLET7I | -0.308 | 5.896E-01 | 4.378E-01 |
| GPR162   | -0.308 | 1.393E-01 | 1.108E-01 |
| PIK3CD   | -0.308 | 1.356E-01 | 1.517E-03 |
| AURKC    | -0.309 | 1.051E-01 | 1.102E-01 |
| RPL3     | -0.309 | 2.943E-03 | 6.309E-01 |
| BTF3     | -0.309 | 3.361E-04 | 2.212E-02 |
| CREB3L3  | -0.309 | 4.688E-01 | 9.762E-02 |
| RACK1    | -0.309 | 2.643E-03 | 2.673E-03 |
| CELSR1   | -0.309 | 1.615E-01 | 5.809E-01 |
| PNISR    | -0.309 | 2.473E-03 | 4.718E-01 |
| PLCB4    | -0.309 | 2.961E-01 | 8.925E-01 |
| GALNT4   | -0.309 | 2.521E-01 | 2.272E-02 |
| TRIM7    | -0.310 | 2.583E-01 | 2.872E-01 |
| PTPRR    | -0.310 | 4.804E-01 | 2.103E-01 |
| RIPK3    | -0.310 | 5.027E-02 | 1.842E-01 |
| GJA9     | -0.310 | 2.917E-01 | 9.227E-02 |
| JAG2     | -0.310 | 7.945E-02 | 1.189E-01 |
| FITM1    | -0.310 | 6.957E-02 | 2.205E-01 |
| ATP2C2   | -0.310 | 2.891E-01 | 2.210E-01 |
| STAT1    | -0.310 | 1.211E-01 | 7.172E-01 |
| ANKLE1   | -0.310 | 1.579E-01 | 4.665E-01 |
| PPAN     | -0.310 | 1.859E-02 | 2.848E-02 |

|              |        |           |           |
|--------------|--------|-----------|-----------|
| SDCBP2       | -0.311 | 2.165E-01 | 1.041E-01 |
| TMEM232      | -0.311 | 9.309E-02 | 5.841E-04 |
| TAS2R9       | -0.311 | NA        | 4.756E-01 |
| CNTN3        | -0.311 | 4.367E-01 | 7.233E-02 |
| DNLZ         | -0.311 | 8.445E-02 | 1.276E-01 |
| HOXD8        | -0.312 | 6.743E-02 | 2.393E-04 |
| RPS2         | -0.312 | 3.822E-03 | 3.782E-01 |
| U2AF1        | -0.312 | 1.559E-01 | 9.124E-02 |
| IFI16        | -0.312 | 1.700E-01 | 1.190E-02 |
| MIR378A      | -0.313 | 3.777E-01 | 4.006E-01 |
| GAMT         | -0.314 | 2.017E-01 | 3.334E-01 |
| ADGRF1       | -0.314 | 4.071E-01 | 5.111E-02 |
| MIR6763      | -0.314 | 4.931E-01 | 3.272E-01 |
| F8A3         | -0.314 | 3.397E-01 | 1.738E-01 |
| NSUN6        | -0.314 | 1.298E-02 | 4.769E-02 |
| C19orf71     | -0.314 | 1.479E-02 | 1.235E-01 |
| CEMIP        | -0.314 | 2.510E-01 | 1.488E-02 |
| AMT          | -0.314 | 1.311E-01 | 3.119E-02 |
| OR51B5       | -0.314 | 7.761E-01 | 2.618E-01 |
| SLC34A1      | -0.314 | 3.377E-01 | 3.255E-01 |
| RPL19        | -0.315 | 7.317E-03 | 7.205E-02 |
| SH2D2A       | -0.315 | 6.909E-02 | 2.901E-01 |
| AL512506.3   | -0.315 | 2.444E-01 | 1.435E-01 |
| STARD4       | -0.315 | 1.621E-01 | 5.283E-01 |
| BAK1         | -0.316 | 9.859E-03 | 3.813E-03 |
| RPL13        | -0.316 | 1.148E-02 | 1.144E-02 |
| POLR2J3      | -0.316 | 1.152E-01 | 5.008E-01 |
| GIF2-C20orf2 | -0.316 | 1.525E-01 | 1.733E-02 |
| RPS6KA1      | -0.316 | 2.914E-03 | 4.767E-02 |
| DMRTC1B      | -0.316 | NA        | 1.928E-01 |
| FAM83E       | -0.316 | 3.936E-01 | 2.411E-01 |
| ADAMTSL2     | -0.316 | 8.171E-02 | 1.333E-02 |
| PTPN7        | -0.316 | 2.583E-01 | 1.532E-01 |
| DNAH2        | -0.316 | 3.467E-01 | 3.133E-01 |
| LRFN4        | -0.317 | 1.428E-01 | 6.737E-02 |
| PRSS42       | -0.317 | 3.902E-01 | 1.456E-01 |
| TCTE3        | -0.317 | 9.087E-03 | 4.574E-01 |
| PDE6G        | -0.317 | 2.390E-01 | 3.610E-02 |
| MIR4477A     | -0.317 | NA        | 3.981E-01 |
| ARAP1        | -0.317 | 1.080E-03 | 1.096E-01 |
| NANOGNB      | -0.317 | NA        | 1.617E-03 |
| AC012309.1   | -0.317 | 2.233E-01 | 7.529E-02 |
| CDH18        | -0.318 | 7.076E-01 | 3.668E-01 |
| PLSCR3       | -0.318 | 1.042E-02 | 2.174E-01 |
| OR3A3        | -0.318 | NA        | 1.218E-01 |
| NEIL1        | -0.318 | 8.977E-02 | 8.419E-02 |
| CXorf65      | -0.318 | 2.879E-01 | 2.253E-01 |
| LY6G6F       | -0.318 | NA        | 1.482E-01 |
| MIR4644      | -0.318 | 4.199E-01 | 2.037E-01 |
| LY9          | -0.318 | 3.317E-01 | 1.066E-01 |

|            |        |           |           |
|------------|--------|-----------|-----------|
| ACY1       | -0.319 | 2.673E-02 | 4.034E-02 |
| MIR23A     | -0.319 | 3.268E-01 | 1.002E-02 |
| OR2L13     | -0.319 | 7.686E-01 | 4.139E-02 |
| ITPKA      | -0.319 | 2.193E-01 | 7.188E-02 |
| GRB14      | -0.319 | 2.545E-01 | 4.485E-02 |
| C16orf74   | -0.319 | 1.345E-01 | 9.533E-02 |
| CRIP3      | -0.319 | 3.025E-01 | 1.479E-01 |
| GAP43      | -0.319 | 4.841E-01 | 1.539E-01 |
| PCYT1B     | -0.319 | 3.833E-01 | 5.488E-03 |
| RPS14      | -0.319 | 1.942E-03 | 3.534E-01 |
| ACTL9      | -0.319 | NA        | 1.695E-01 |
| AC011448.1 | -0.320 | 8.365E-03 | 3.695E-01 |
| TRIM22     | -0.320 | 1.585E-01 | 1.053E-01 |
| C10orf95   | -0.320 | 6.334E-02 | 4.598E-03 |
| DUSP7      | -0.320 | 1.117E-01 | 1.193E-02 |
| LEUTX      | -0.320 | NA        | 9.664E-02 |
| FAM3D      | -0.320 | 5.243E-01 | 2.107E-01 |
| CITED1     | -0.320 | 1.395E-01 | 1.345E-01 |
| ACSM4      | -0.320 | 3.918E-01 | 9.872E-02 |
| CHRNA3     | -0.320 | 3.043E-01 | 2.144E-01 |
| ZNF614     | -0.320 | 2.595E-02 | 6.475E-02 |
| KIR3DL1    | -0.320 | 5.293E-01 | 2.431E-02 |
| KRTAP20-4  | -0.320 | 8.911E-01 | 4.296E-01 |
| MIR656     | -0.320 | NA        | 1.110E-01 |
| SLC35G1    | -0.320 | 3.267E-02 | 8.143E-01 |
| ZBED5      | -0.321 | 8.290E-05 | 6.476E-01 |
| PCDHAC1    | -0.321 | 5.299E-01 | 4.776E-02 |
| PROP1      | -0.321 | 6.308E-01 | 1.891E-01 |
| CD101      | -0.321 | 5.616E-02 | 2.844E-03 |
| RBM11      | -0.321 | 2.351E-01 | 1.676E-01 |
| PABPC1L2A  | -0.321 | NA        | 5.127E-02 |
| MXD4       | -0.321 | 1.806E-03 | 8.400E-03 |
| MIR194-1   | -0.322 | NA        | 3.533E-02 |
| SORL1      | -0.322 | 1.997E-01 | 6.954E-02 |
| MIR8058    | -0.322 | 7.507E-01 | 5.258E-02 |
| WDR27      | -0.322 | 1.126E-02 | 4.770E-01 |
| CX3CL1     | -0.322 | 2.576E-01 | 1.304E-02 |
| CTNND2     | -0.322 | 4.595E-01 | 3.915E-03 |
| PTK2B      | -0.322 | 2.363E-02 | 1.747E-03 |
| TMEM221    | -0.323 | 1.717E-01 | 5.246E-04 |
| UGT2A2     | -0.323 | NA        | 1.135E-02 |
| ATP5EP2    | -0.323 | 5.331E-02 | 3.909E-01 |
| TTN        | -0.323 | 5.262E-02 | 4.876E-04 |
| ZNF536     | -0.323 | 4.525E-01 | 6.995E-02 |
| ADGRD2     | -0.323 | 4.859E-01 | 2.092E-01 |
| TP63       | -0.323 | 2.510E-01 | 2.136E-01 |
| MIR5194    | -0.323 | 5.415E-01 | 3.212E-01 |
| SLC6A20    | -0.324 | 3.525E-01 | 3.462E-01 |
| CD27       | -0.324 | 2.581E-01 | 1.517E-01 |
| PIGL       | -0.324 | 3.803E-03 | 5.103E-01 |

|            |        |           |           |
|------------|--------|-----------|-----------|
| MMEL1      | -0.324 | 2.498E-01 | 4.504E-01 |
| F11        | -0.324 | 6.293E-01 | 1.623E-01 |
| OR2A42     | -0.324 | NA        | 1.070E-03 |
| CKMT1A     | -0.324 | 2.007E-01 | 1.047E-03 |
| GPR153     | -0.324 | 1.107E-01 | 4.555E-02 |
| ADGRG3     | -0.324 | 2.578E-01 | 2.611E-01 |
| TFEB       | -0.325 | 4.300E-02 | 2.373E-01 |
| NUP107     | -0.325 | 8.023E-03 | 7.959E-01 |
| ZNF558     | -0.325 | 1.231E-02 | 1.291E-02 |
| MYO7B      | -0.325 | 2.869E-01 | 4.013E-01 |
| AL136295.4 | -0.325 | 5.858E-02 | 5.466E-02 |
| TBC1D4     | -0.325 | 2.042E-02 | 1.925E-03 |
| HEPACAM    | -0.325 | 5.419E-01 | 5.524E-01 |
| AOAH       | -0.325 | 2.828E-01 | 6.119E-03 |
| CTSV       | -0.326 | 3.175E-01 | 4.352E-02 |
| CFAP53     | -0.326 | 8.930E-02 | 9.291E-03 |
| MEGF6      | -0.326 | 1.620E-01 | 9.447E-02 |
| DOC2B      | -0.326 | 2.131E-01 | 1.206E-01 |
| GPRC6A     | -0.326 | 6.851E-01 | 3.668E-04 |
| DGKA       | -0.326 | 2.953E-02 | 6.872E-01 |
| METAP1D    | -0.326 | 2.461E-03 | 2.582E-01 |
| ROBO3      | -0.327 | 1.438E-01 | 4.207E-01 |
| FOXB2      | -0.327 | NA        | 6.693E-02 |
| DUX4       | -0.327 | NA        | 7.503E-03 |
| OR2T10     | -0.327 | NA        | 1.671E-01 |
| JMJD7      | -0.327 | 7.326E-02 | 7.813E-02 |
| MIR566     | -0.327 | 6.211E-01 | 3.876E-02 |
| AC068896.1 | -0.327 | 8.905E-02 | 2.105E-01 |
| DPY19L2    | -0.327 | 2.542E-01 | 1.834E-01 |
| FAM166B    | -0.327 | 7.505E-02 | 1.076E-01 |
| CLDN17     | -0.327 | 8.306E-01 | 1.298E-01 |
| HOXD10     | -0.327 | 2.758E-01 | 8.112E-02 |
| CHL1       | -0.327 | 4.624E-01 | 5.625E-02 |
| NUDT14     | -0.327 | 1.558E-02 | 1.194E-01 |
| FAM159A    | -0.328 | 2.384E-01 | 2.819E-01 |
| GPR31      | -0.328 | 4.578E-01 | 2.960E-01 |
| TRIM43     | -0.328 | 8.204E-01 | 6.045E-02 |
| SULT1A1    | -0.328 | 1.732E-01 | 6.055E-02 |
| DRD3       | -0.328 | NA        | 6.462E-02 |
| MIR7848    | -0.329 | 5.638E-01 | 4.723E-02 |
| H1FNT      | -0.329 | 3.439E-01 | 2.272E-02 |
| RGS9       | -0.329 | 2.044E-01 | 2.584E-02 |
| ID3        | -0.329 | 1.082E-01 | 4.150E-01 |
| ANKRD18B   | -0.329 | 1.699E-01 | 6.512E-02 |
| TXNDC17    | -0.329 | 8.083E-03 | 5.824E-02 |
| DSP        | -0.329 | 2.484E-01 | 2.222E-01 |
| TP53AIP1   | -0.330 | 3.515E-01 | 1.123E-02 |
| AP000295.1 | -0.330 | 3.376E-01 | 1.407E-01 |
| UNC79      | -0.330 | 5.040E-02 | 2.730E-01 |
| MMP24      | -0.331 | 8.719E-02 | 2.244E-02 |

|            |        |           |           |
|------------|--------|-----------|-----------|
| LSAMP      | -0.331 | 2.122E-01 | 8.591E-02 |
| FOXD4      | -0.332 | 1.811E-01 | 3.591E-02 |
| TAS2R31    | -0.332 | 1.366E-01 | 3.501E-02 |
| PLG        | -0.332 | 5.852E-01 | 6.459E-02 |
| GML        | -0.332 | NA        | 4.587E-01 |
| RASAL3     | -0.332 | 1.514E-01 | 4.449E-01 |
| RUFY4      | -0.332 | 2.405E-01 | 1.687E-01 |
| ARL6IP4    | -0.332 | 1.666E-02 | 7.628E-02 |
| VSIG2      | -0.333 | 3.798E-01 | 1.625E-01 |
| TX16-NPEPL | -0.333 | 1.211E-01 | 7.653E-02 |
| VWA5B2     | -0.333 | 2.027E-01 | 3.592E-01 |
| TRIM75P    | -0.333 | 6.274E-01 | 4.880E-05 |
| FSHB       | -0.334 | NA        | 1.385E-01 |
| OAS3       | -0.334 | 4.989E-02 | 7.294E-04 |
| CBR4       | -0.334 | 1.950E-03 | 8.143E-01 |
| MIR1296    | -0.334 | NA        | 5.037E-02 |
| LINC00282  | -0.334 | 4.309E-01 | 5.290E-02 |
| SMIM21     | -0.334 | NA        | 1.353E-01 |
| DRAXIN     | -0.334 | 2.019E-01 | 1.826E-01 |
| C16orf78   | -0.334 | NA        | 5.221E-01 |
| OR51B4     | -0.334 | 7.321E-01 | 1.750E-01 |
| TMEM246    | -0.334 | 2.498E-01 | 1.027E-01 |
| ADGRV1     | -0.334 | 1.744E-01 | 4.197E-01 |
| TMEM156    | -0.334 | 2.021E-01 | 3.768E-02 |
| HBG2       | -0.335 | 3.077E-01 | 1.336E-01 |
| INPP5D     | -0.335 | 8.846E-02 | 3.607E-01 |
| NR2E1      | -0.335 | 4.523E-01 | 2.457E-01 |
| SLC6A1     | -0.335 | 1.192E-01 | 6.930E-02 |
| LPO        | -0.335 | 3.277E-01 | 6.443E-02 |
| GJA10      | -0.335 | NA        | 9.069E-02 |
| SLC35F1    | -0.336 | 1.560E-01 | 1.093E-01 |
| AC090527.2 | -0.336 | 4.680E-01 | 9.117E-02 |
| KAAG1      | -0.336 | 5.210E-01 | 1.511E-02 |
| CASP1      | -0.336 | 1.517E-01 | 1.009E-01 |
| GLI4       | -0.336 | 9.522E-03 | 1.259E-01 |
| MIR210     | -0.336 | 2.549E-01 | 3.252E-03 |
| TMPRSS5    | -0.336 | 4.243E-02 | 4.115E-02 |
| DDX60      | -0.336 | 1.427E-01 | 1.823E-01 |
| HEY2       | -0.336 | 3.326E-02 | 1.533E-01 |
| MIR6864    | -0.336 | 4.827E-01 | 5.393E-02 |
| MIR3685    | -0.336 | 1.904E-02 | 4.319E-02 |
| STX11      | -0.337 | 1.097E-01 | 4.046E-03 |
| RUNX3      | -0.337 | 1.991E-01 | 2.044E-02 |
| HMX2       | -0.337 | 5.508E-01 | 2.261E-01 |
| GHRHR      | -0.337 | 6.736E-01 | 1.249E-01 |
| NDUFA13    | -0.337 | 1.032E-02 | 2.253E-02 |
| FMR1NB     | -0.337 | 5.045E-01 | 4.373E-02 |
| MAFA       | -0.337 | 2.959E-01 | 7.030E-03 |
| ABCB11     | -0.337 | 4.810E-01 | 3.523E-02 |
| LRRC4B     | -0.337 | 1.438E-01 | 1.038E-01 |

|             |        |           |           |
|-------------|--------|-----------|-----------|
| PWP2        | -0.338 | 2.891E-01 | 3.802E-01 |
| SLC44A4     | -0.338 | 3.636E-01 | 4.231E-02 |
| PPIAL4D     | -0.338 | NA        | 3.082E-02 |
| AC005833.3  | -0.338 | 2.676E-01 | 4.892E-02 |
| FCGR3B      | -0.338 | 3.742E-01 | 2.894E-02 |
| ANKRD36C    | -0.338 | 1.195E-01 | 1.495E-01 |
| CAPS        | -0.338 | 1.980E-01 | 2.861E-02 |
| RGL3        | -0.338 | 3.067E-01 | 2.878E-01 |
| FAM13A      | -0.338 | 4.689E-02 | 1.712E-01 |
| AKNA        | -0.338 | 1.043E-02 | 5.704E-01 |
| AC069257.3  | -0.339 | 5.146E-01 | 1.327E-01 |
| CDYL2       | -0.339 | 4.040E-02 | 2.907E-01 |
| COL25A1     | -0.339 | 3.321E-01 | 3.010E-05 |
| TBX6        | -0.339 | 1.491E-01 | 1.687E-01 |
| MIR1270     | -0.339 | 4.412E-01 | 6.040E-01 |
| MBOAT4      | -0.340 | 3.638E-02 | 3.278E-02 |
| MIR23C      | -0.340 | NA        | 4.933E-01 |
| NACA2       | -0.340 | 5.835E-02 | 1.594E-01 |
| HNRNPCL1    | -0.340 | 3.222E-01 | 9.205E-02 |
| AMN         | -0.340 | 1.891E-01 | 3.198E-01 |
| TMEM255A    | -0.340 | 2.586E-01 | 2.632E-01 |
| FAM193B     | -0.340 | 2.914E-03 | 2.200E-01 |
| MS4A5       | -0.341 | 6.074E-01 | 4.342E-03 |
| TNFRSF10B   | -0.341 | 8.198E-03 | 1.308E-01 |
| NKX6-1      | -0.341 | 5.133E-01 | 2.586E-01 |
| GSTP1       | -0.341 | 1.664E-02 | 7.406E-02 |
| KITLG       | -0.341 | 1.538E-01 | 2.827E-01 |
| IJD7-PLA2G4 | -0.341 | 7.146E-02 | 5.390E-05 |
| HOXD3       | -0.342 | 4.869E-02 | 1.473E-01 |
| FAM129C     | -0.342 | 3.063E-01 | 4.497E-01 |
| CFAP70      | -0.342 | 8.812E-02 | 7.466E-02 |
| RAX2        | -0.342 | NA        | 3.040E-03 |
| LRRC3       | -0.342 | 1.091E-01 | 1.563E-01 |
| HOXB4       | -0.342 | 4.686E-02 | 2.133E-01 |
| ARGFX       | -0.342 | NA        | 1.189E-04 |
| PARP15      | -0.342 | 1.911E-01 | 2.526E-01 |
| NOL12       | -0.342 | 2.981E-04 | 7.355E-01 |
| HNMT        | -0.342 | 4.832E-02 | 5.033E-02 |
| SPATA20     | -0.342 | 8.642E-03 | 6.952E-02 |
| MTFP1       | -0.343 | 2.807E-03 | 3.786E-03 |
| ATP5I       | -0.343 | 6.024E-03 | 9.583E-03 |
| PPFIBP2     | -0.343 | 1.414E-01 | 1.229E-01 |
| PTH2R       | -0.343 | 5.540E-01 | 9.196E-02 |
| LIPM        | -0.343 | 1.603E-01 | 1.491E-01 |
| LINGO3      | -0.343 | 2.346E-01 | 5.396E-01 |
| OR5M10      | -0.343 | NA        | 3.792E-03 |
| NME5        | -0.344 | 2.762E-01 | 3.221E-01 |
| CKMT1B      | -0.344 | 1.736E-01 | 3.992E-01 |
| DOCK10      | -0.344 | 1.316E-01 | 1.982E-01 |
| MIR3065     | -0.344 | 5.299E-01 | 7.181E-02 |

|          |        |           |           |
|----------|--------|-----------|-----------|
| CEND1    | -0.344 | 1.273E-01 | 5.339E-01 |
| VIPR1    | -0.344 | 2.204E-01 | 1.078E-01 |
| GOLT1A   | -0.344 | 2.558E-01 | 1.579E-02 |
| TUBG2    | -0.345 | 1.248E-02 | 8.566E-01 |
| XKR6     | -0.345 | 1.374E-01 | 5.914E-03 |
| FOXD3    | -0.345 | 4.690E-01 | 6.349E-01 |
| LRRTM2   | -0.345 | 1.703E-01 | 1.649E-01 |
| SLC22A5  | -0.345 | 1.252E-02 | 1.740E-04 |
| SLC5A4   | -0.345 | 1.792E-01 | 1.877E-01 |
| BST2     | -0.345 | 1.666E-01 | 5.002E-01 |
| BNIP3    | -0.345 | 9.191E-02 | 3.331E-01 |
| AGBL2    | -0.345 | 4.426E-02 | 1.889E-01 |
| CSRP2    | -0.346 | 3.952E-02 | 4.372E-01 |
| ERAP2    | -0.346 | 1.985E-01 | 2.009E-02 |
| SLC7A9   | -0.346 | 1.859E-01 | 7.779E-04 |
| DLGAP1   | -0.346 | 4.234E-01 | 1.416E-04 |
| ZDHHC11B | -0.346 | 3.347E-01 | 5.200E-02 |
| RNF212B  | -0.346 | 1.401E-01 | 4.501E-01 |
| ZG16B    | -0.346 | 2.693E-01 | 2.271E-03 |
| DEF6     | -0.347 | 2.157E-03 | 1.148E-01 |
| IKZF3    | -0.347 | 7.123E-02 | 6.882E-01 |
| C1orf94  | -0.347 | 5.829E-01 | 2.470E-01 |
| PPFIA4   | -0.347 | 1.616E-01 | 6.533E-04 |
| IL37     | -0.347 | 3.100E-01 | 7.614E-02 |
| CLDN20   | -0.347 | 1.136E-01 | 9.902E-04 |
| MIR6812  | -0.347 | 2.512E-01 | 2.514E-02 |
| FRMPD3   | -0.348 | 2.142E-01 | 8.611E-01 |
| TGFB2    | -0.348 | 2.235E-01 | 3.592E-01 |
| REG3G    | -0.348 | NA        | 1.776E-01 |
| SPACA5   | -0.348 | 6.079E-01 | 9.061E-03 |
| OR9A4    | -0.348 | 6.274E-01 | 4.510E-05 |
| PRPS1L1  | -0.348 | 7.737E-01 | 4.145E-01 |
| LYNX1    | -0.349 | 2.207E-01 | 4.005E-01 |
| PRAMEF8  | -0.349 | NA        | 4.421E-03 |
| LPAR6    | -0.350 | 7.442E-02 | 1.454E-02 |
| HMGCS2   | -0.350 | 5.533E-01 | 1.914E-01 |
| HMGCLL1  | -0.350 | 3.625E-01 | 6.274E-01 |
| ITGB7    | -0.350 | 6.795E-02 | 2.812E-01 |
| RHBDL1   | -0.350 | 8.949E-02 | 6.856E-02 |
| DCC      | -0.350 | 2.097E-01 | 6.235E-02 |
| CNTNAP5  | -0.350 | 5.599E-01 | 1.074E-01 |
| TTLL6    | -0.350 | 4.244E-01 | 5.690E-02 |
| RGS12    | -0.350 | 1.976E-03 | 3.803E-02 |
| ZNF692   | -0.350 | 1.042E-02 | 2.371E-01 |
| SLC7A5   | -0.350 | 1.283E-01 | 5.279E-01 |
| PRSS50   | -0.351 | 3.736E-01 | 2.045E-02 |
| SLC47A2  | -0.351 | 3.771E-01 | 3.444E-01 |
| KIFC2    | -0.351 | 6.762E-02 | 5.982E-01 |
| LIPI     | -0.351 | 2.429E-01 | 2.680E-01 |
| ZNF705E  | -0.351 | 1.587E-01 | 3.541E-01 |

|            |        |           |           |
|------------|--------|-----------|-----------|
| NUDT12     | -0.351 | 2.361E-02 | 3.749E-01 |
| OR2B11     | -0.351 | NA        | 6.258E-01 |
| KCNH1      | -0.351 | 1.746E-01 | 3.874E-01 |
| SIX6       | -0.351 | NA        | 9.021E-02 |
| DUSP13     | -0.352 | 3.743E-01 | 1.946E-01 |
| MEPE       | -0.352 | 4.425E-01 | 4.781E-01 |
| CARD18     | -0.352 | 6.755E-01 | 1.562E-01 |
| ODC1       | -0.352 | 5.695E-02 | 1.280E-01 |
| MIR3657    | -0.352 | 4.532E-01 | 3.035E-02 |
| WSCD2      | -0.353 | 4.130E-01 | 3.086E-03 |
| PDZD9      | -0.353 | 1.066E-01 | 1.900E-02 |
| ANKRD50    | -0.353 | 4.913E-02 | 9.816E-02 |
| CATSPER3   | -0.353 | 2.547E-02 | 4.830E-03 |
| F12        | -0.353 | 1.223E-01 | 1.009E-01 |
| SPANXC     | -0.353 | 8.043E-01 | 1.800E-01 |
| ZFR2       | -0.353 | 3.110E-01 | 3.690E-02 |
| SEC14L6    | -0.354 | 2.735E-01 | 1.656E-01 |
| IZUMO4     | -0.354 | 4.243E-02 | 6.355E-02 |
| ZNF266     | -0.354 | 2.347E-03 | 4.029E-02 |
| USP17L1    | -0.354 | NA        | 5.857E-02 |
| DBX1       | -0.354 | 7.733E-01 | 2.449E-02 |
| ADSSL1     | -0.354 | 1.359E-01 | 7.862E-02 |
| ARHGAP25   | -0.354 | 4.242E-02 | 5.090E-02 |
| CDHR2      | -0.355 | 9.219E-02 | 7.295E-01 |
| C11orf21   | -0.355 | 1.984E-01 | 2.408E-01 |
| FOSB       | -0.355 | 2.613E-01 | 4.009E-02 |
| IGF2       | -0.355 | 5.157E-01 | 2.870E-03 |
| TEKT5      | -0.355 | 3.232E-01 | 8.963E-03 |
| MIR616     | -0.355 | 2.308E-01 | 5.384E-02 |
| AC068790.8 | -0.355 | 1.255E-01 | 3.164E-02 |
| ADCY8      | -0.355 | 5.194E-01 | 1.861E-01 |
| TGM1       | -0.355 | 3.525E-01 | 2.317E-02 |
| SLC45A4    | -0.355 | 1.339E-02 | 1.427E-03 |
| COL9A3     | -0.355 | 1.824E-01 | 1.345E-01 |
| PEG10      | -0.355 | 3.886E-01 | 9.753E-03 |
| FGD2       | -0.356 | 8.912E-02 | 7.131E-02 |
| KRTAP4-12  | -0.356 | NA        | 1.748E-03 |
| FAM177B    | -0.356 | 1.734E-01 | 2.090E-02 |
| FAAH       | -0.356 | 4.427E-02 | 8.041E-02 |
| SMIM28     | -0.356 | 6.359E-01 | 2.197E-03 |
| NR2E3      | -0.356 | 5.019E-02 | 2.190E-05 |
| FBXO39     | -0.356 | 2.565E-01 | 2.515E-01 |
| CRX        | -0.356 | 3.268E-01 | 4.410E-02 |
| SYCP2L     | -0.357 | 2.715E-01 | 5.120E-02 |
| RGL4       | -0.357 | 1.709E-02 | 1.428E-03 |
| CYFIP2     | -0.357 | 5.768E-02 | 3.418E-03 |
| ADORA2B    | -0.357 | 1.249E-01 | 1.328E-02 |
| CYP2C18    | -0.357 | 4.721E-01 | 9.960E-02 |
| SLC2A9     | -0.358 | 1.092E-01 | 1.166E-01 |
| PDE7A      | -0.358 | 2.826E-03 | 1.254E-01 |



|            |        |           |           |
|------------|--------|-----------|-----------|
| SLC25A47   | -0.358 | 3.742E-01 | 9.584E-02 |
| KCNK7      | -0.358 | 1.438E-01 | 5.664E-02 |
| CD1D       | -0.358 | 8.171E-02 | 5.607E-01 |
| INPP1      | -0.359 | 1.871E-02 | 1.720E-01 |
| SSX2B      | -0.359 | 8.413E-01 | 2.804E-02 |
| HPX        | -0.359 | 1.080E-01 | 4.288E-02 |
| TNFSF13B   | -0.359 | 1.579E-01 | 1.048E-01 |
| NKX2-8     | -0.360 | 4.833E-01 | 1.039E-01 |
| C1orf141   | -0.360 | 5.576E-01 | 1.067E-01 |
| SPDEF      | -0.360 | 3.642E-01 | 8.445E-02 |
| AQP7       | -0.360 | 3.573E-01 | 6.432E-03 |
| CEACAM8    | -0.360 | 4.173E-01 | 7.653E-03 |
| NMUR1      | -0.360 | 1.561E-01 | 4.641E-01 |
| FAM90A26   | -0.361 | 4.657E-01 | 1.371E-01 |
| ALDH1A3    | -0.361 | 1.544E-01 | 2.749E-01 |
| GJD4       | -0.361 | 3.486E-01 | 4.824E-02 |
| BEND2      | -0.361 | 5.701E-01 | 3.752E-02 |
| ZRSR1      | -0.361 | 1.380E-01 | 1.912E-01 |
| MAMDC4     | -0.361 | 3.276E-02 | 7.549E-02 |
| GSTTP1     | -0.362 | 4.362E-01 | 7.392E-02 |
| OAS2       | -0.362 | 9.233E-02 | 3.610E-05 |
| HTR1E      | -0.362 | 6.594E-01 | 1.647E-02 |
| ACSL6      | -0.362 | 1.878E-01 | 3.857E-01 |
| SLC10A5    | -0.362 | 2.828E-02 | 2.195E-04 |
| ARAP3      | -0.362 | 1.075E-02 | 9.073E-03 |
| RBM20      | -0.362 | 2.601E-01 | 2.297E-02 |
| PLEKHG4    | -0.362 | 1.755E-01 | 2.484E-01 |
| GCSAM      | -0.363 | 5.835E-02 | 3.870E-04 |
| CD79B      | -0.363 | 2.027E-01 | 1.187E-04 |
| MATN4      | -0.363 | 1.713E-01 | 5.265E-01 |
| TAGAP      | -0.363 | 1.370E-01 | 2.149E-01 |
| AC243967.1 | -0.363 | NA        | 2.422E-01 |
| FAM53B     | -0.363 | 1.561E-03 | 2.152E-02 |
| MYO7A      | -0.363 | 9.309E-02 | 1.092E-01 |
| CCDC54     | -0.363 | 3.660E-01 | 4.250E-01 |
| ZNF80      | -0.364 | 3.045E-01 | 1.503E-01 |
| CITED4     | -0.364 | 1.015E-01 | 1.159E-01 |
| CXCL1      | -0.364 | 3.509E-01 | 5.426E-02 |
| UCN2       | -0.364 | 1.944E-01 | 1.627E-02 |
| HDAC10     | -0.364 | 4.921E-03 | 1.044E-02 |
| HAS3       | -0.364 | 1.680E-01 | 8.014E-02 |
| TRAF5      | -0.364 | 4.243E-03 | 3.424E-02 |
| NTF4       | -0.365 | 1.619E-01 | 1.317E-01 |
| ARL5C      | -0.365 | 4.518E-01 | 2.218E-02 |
| PLA2G4B    | -0.365 | 9.592E-02 | 2.214E-01 |
| SLC7A14    | -0.365 | 5.097E-01 | 6.442E-01 |
| AL024498.2 | -0.365 | 5.191E-01 | 2.042E-01 |
| LGI3       | -0.365 | 3.753E-01 | 3.537E-03 |
| RBP5       | -0.365 | 5.234E-02 | 1.901E-01 |
| PCGF3      | -0.365 | 6.793E-04 | 5.087E-02 |

|          |        |           |           |
|----------|--------|-----------|-----------|
| TTC6     | -0.365 | 2.279E-01 | 9.185E-02 |
| RNF212   | -0.365 | 2.546E-01 | 3.229E-02 |
| THEGL    | -0.365 | 3.688E-01 | 2.925E-01 |
| TMEM132D | -0.365 | 5.494E-01 | 1.176E-01 |
| SLC23A3  | -0.365 | 7.965E-02 | 1.187E-01 |
| CA7      | -0.365 | 3.504E-01 | 9.446E-02 |
| KIAA1456 | -0.366 | 2.754E-01 | 3.495E-01 |
| FEZF2    | -0.366 | NA        | 4.938E-02 |
| CSH2     | -0.366 | 7.301E-01 | 7.805E-02 |
| Z82206.1 | -0.366 | 5.147E-02 | 1.325E-01 |
| TBC1D21  | -0.366 | NA        | 6.570E-01 |
| GPR33    | -0.366 | 6.058E-01 | 1.071E-01 |
| SEMA6A   | -0.367 | 1.933E-01 | 3.136E-01 |
| ZNF10    | -0.367 | 1.396E-02 | 6.160E-04 |
| ITGA6    | -0.367 | 8.974E-02 | 8.010E-05 |
| G6PC     | -0.367 | 5.313E-01 | 2.211E-01 |
| SNTG1    | -0.367 | 5.200E-01 | 5.132E-02 |
| GALNT8   | -0.368 | 2.605E-01 | 6.893E-02 |
| ASB12    | -0.369 | 1.708E-01 | 4.374E-04 |
| ORM1     | -0.369 | 5.732E-01 | 3.609E-02 |
| SCAMP5   | -0.369 | 5.695E-02 | 1.249E-02 |
| BPIFB1   | -0.369 | 5.299E-01 | 3.167E-02 |
| CXCR1    | -0.369 | 3.219E-01 | 5.995E-02 |
| PFN3     | -0.369 | NA        | 1.538E-02 |
| M1AP     | -0.369 | 3.449E-01 | 3.900E-02 |
| SLC52A1  | -0.369 | 1.826E-01 | 4.556E-03 |
| ARHGAP26 | -0.370 | 1.139E-02 | 9.761E-04 |
| RNF17    | -0.370 | 3.056E-01 | 5.501E-02 |
| PPARGC1A | -0.370 | 3.969E-01 | 2.228E-01 |
| ZC3H12D  | -0.371 | 1.316E-01 | 1.405E-01 |
| DCAF8L2  | -0.371 | 7.525E-01 | 2.535E-03 |
| RRAD     | -0.371 | 2.938E-01 | 1.292E-01 |
| EEF1G    | -0.371 | 3.364E-02 | 2.796E-01 |
| TNFRSF9  | -0.371 | 1.738E-01 | 1.692E-01 |
| IL2RG    | -0.371 | 2.038E-01 | 2.543E-02 |
| RAB26    | -0.371 | 1.495E-01 | 3.631E-01 |
| HEY1     | -0.371 | 9.749E-02 | 4.559E-01 |
| TRMT1    | -0.371 | 1.200E-04 | 3.764E-01 |
| HTR1A    | -0.371 | NA        | 1.653E-01 |
| RNASET2  | -0.371 | 3.460E-02 | 4.179E-02 |
| CTAG2    | -0.371 | 7.274E-01 | 2.434E-03 |
| TMEM257  | -0.372 | NA        | 5.363E-02 |
| TSPY10   | -0.372 | NA        | 1.413E-02 |
| LUZP4    | -0.372 | 7.712E-01 | 2.292E-01 |
| PPARGC1B | -0.372 | 1.290E-02 | 1.630E-01 |
| OR52L1   | -0.372 | 6.371E-01 | 1.253E-01 |
| KCTD4    | -0.373 | 4.635E-01 | 2.059E-01 |
| COL7A1   | -0.373 | 1.374E-01 | 6.761E-01 |
| CD52     | -0.373 | 1.657E-01 | 1.072E-02 |
| FAM86B1  | -0.373 | 8.185E-02 | 1.566E-01 |

|            |        |           |           |
|------------|--------|-----------|-----------|
| KISS1R     | -0.373 | 3.314E-01 | 7.639E-02 |
| NEUROG1    | -0.373 | NA        | 1.102E-03 |
| TACC3      | -0.373 | 1.102E-02 | 1.365E-01 |
| CD53       | -0.373 | 1.655E-01 | 2.139E-01 |
| MIR571     | -0.374 | 3.567E-01 | 1.665E-02 |
| ANGPT2     | -0.374 | 3.136E-02 | 6.568E-03 |
| CACNA1I    | -0.375 | 3.627E-01 | 7.008E-02 |
| PRM2       | -0.375 | NA        | 1.175E-01 |
| EIF4A1     | -0.375 | 1.039E-03 | 1.765E-02 |
| CDHR5      | -0.375 | 3.091E-01 | 2.194E-01 |
| TNFRSF18   | -0.375 | 1.669E-01 | 1.803E-01 |
| GPRIN3     | -0.375 | 4.040E-02 | 2.557E-02 |
| CD37       | -0.376 | 1.830E-01 | 6.519E-04 |
| ADH4       | -0.376 | 3.897E-01 | 1.393E-01 |
| ARG2       | -0.376 | 5.226E-02 | 1.096E-01 |
| TPCN1      | -0.376 | 8.083E-03 | 1.130E-02 |
| MEP1B      | -0.376 | 1.368E-01 | 5.583E-02 |
| KLRC2      | -0.376 | 3.973E-01 | 4.550E-01 |
| RPL9       | -0.376 | 2.487E-04 | 2.747E-01 |
| TFCP2L1    | -0.376 | 1.365E-01 | 9.553E-02 |
| CAPN11     | -0.377 | 7.148E-02 | 1.449E-02 |
| C6orf58    | -0.377 | 8.493E-02 | 7.291E-02 |
| ZIM3       | -0.377 | 5.826E-01 | 4.073E-03 |
| CALHM1     | -0.377 | 2.116E-01 | 1.381E-04 |
| C21orf33   | -0.377 | 2.986E-01 | 2.560E-01 |
| LIPK       | -0.377 | 4.641E-01 | 3.256E-02 |
| IL18RAP    | -0.378 | 1.444E-01 | 8.003E-02 |
| SIRPD      | -0.378 | 3.299E-01 | 3.191E-01 |
| UGT1A1     | -0.378 | 4.801E-01 | 1.632E-02 |
| JPH1       | -0.378 | 9.314E-02 | 2.014E-03 |
| KRTAP19-8  | -0.378 | 6.927E-01 | 1.743E-01 |
| REM2       | -0.378 | 1.636E-02 | 1.546E-01 |
| POU3F3     | -0.378 | 6.417E-01 | 8.848E-01 |
| MIR106B    | -0.378 | 2.813E-01 | 6.683E-04 |
| GPR55      | -0.378 | 1.427E-01 | 3.550E-05 |
| MIR302A    | -0.378 | NA        | 1.906E-02 |
| SPIRE2     | -0.379 | 1.137E-01 | 3.629E-02 |
| MIR7974    | -0.379 | 4.791E-01 | 1.115E-01 |
| ASXL3      | -0.379 | 2.227E-01 | 6.088E-03 |
| NOVA1      | -0.379 | 2.452E-01 | 3.045E-02 |
| ATP2A3     | -0.379 | 5.998E-02 | 1.011E-01 |
| NPIPA5     | -0.380 | 1.777E-01 | 2.866E-01 |
| COLQ       | -0.380 | 5.511E-02 | 7.969E-02 |
| RPL6       | -0.380 | 6.910E-05 | 2.830E-02 |
| C1orf145   | -0.381 | 7.384E-02 | 2.252E-03 |
| HOXD9      | -0.381 | 3.198E-02 | 7.005E-02 |
| VWCE       | -0.381 | 8.443E-02 | 4.305E-01 |
| SLC16A1    | -0.381 | 2.113E-01 | 7.591E-02 |
| AC009336.2 | -0.381 | 1.573E-01 | 7.163E-02 |
| GPR39      | -0.381 | 1.331E-01 | 7.375E-02 |

|           |        |           |           |
|-----------|--------|-----------|-----------|
| TREH      | -0.381 | 3.079E-01 | 1.912E-02 |
| CARMIL2   | -0.381 | 1.630E-01 | 5.458E-03 |
| ZNF709    | -0.381 | 2.322E-02 | 2.852E-02 |
| PKP1      | -0.381 | 2.980E-01 | 7.111E-03 |
| ANGPT4    | -0.381 | 2.100E-01 | 2.742E-01 |
| KRTAP2-1  | -0.382 | NA        | 2.852E-01 |
| STC2      | -0.382 | 9.413E-02 | 2.280E-01 |
| LTA       | -0.382 | 1.712E-01 | 7.010E-02 |
| TMEM116   | -0.382 | 4.787E-03 | 5.000E-02 |
| CCT8L2    | -0.382 | NA        | 5.512E-02 |
| CYP27B1   | -0.382 | 4.299E-02 | 2.926E-03 |
| ENTPD5    | -0.382 | 2.853E-02 | 4.237E-01 |
| BAIAP2L2  | -0.382 | 2.090E-01 | 3.703E-02 |
| LDLRAD1   | -0.382 | 4.667E-01 | 1.600E-02 |
| PDZK1     | -0.382 | 2.254E-01 | 2.104E-01 |
| CACNB4    | -0.382 | 2.009E-01 | 2.917E-02 |
| KCNJ15    | -0.382 | 1.279E-01 | 5.304E-01 |
| AQP12A    | -0.383 | 6.713E-01 | 1.520E-02 |
| RBPJL     | -0.383 | 2.456E-01 | 1.788E-01 |
| TIFAB     | -0.383 | 2.833E-01 | 2.430E-02 |
| KIF12     | -0.383 | 3.187E-01 | 4.965E-03 |
| MIR4420   | -0.383 | 4.408E-01 | 1.163E-01 |
| MYOC      | -0.383 | 3.914E-01 | 3.503E-02 |
| APOL2     | -0.383 | 1.119E-02 | 7.723E-02 |
| MIRLET7G  | -0.383 | NA        | 4.708E-02 |
| SP140     | -0.384 | 1.830E-01 | 6.312E-02 |
| RBP3      | -0.384 | 3.286E-01 | 2.224E-01 |
| TRPV4     | -0.384 | 5.616E-02 | 3.058E-01 |
| ADAT2     | -0.384 | 7.139E-04 | 1.902E-01 |
| KIF21B    | -0.384 | 1.076E-02 | 1.526E-01 |
| ABAT      | -0.384 | 1.066E-01 | 6.503E-02 |
| GNG13     | -0.385 | 3.462E-01 | 9.960E-02 |
| SYT13     | -0.385 | 5.413E-01 | 1.172E-01 |
| GAS2L2    | -0.385 | 3.360E-01 | 2.174E-01 |
| NPIP2     | -0.385 | 1.760E-01 | 4.870E-02 |
| GOLGA6L4  | -0.385 | 1.139E-01 | 2.693E-01 |
| ARHGAP9   | -0.386 | 1.277E-01 | 2.112E-01 |
| GRM8      | -0.386 | 1.721E-01 | 2.201E-01 |
| MIR6859-2 | -0.386 | 4.299E-01 | 4.793E-02 |
| TNS4      | -0.386 | 1.431E-01 | 3.137E-01 |
| CDK18     | -0.387 | 1.129E-02 | 1.339E-01 |
| FOXD4L1   | -0.387 | 1.012E-01 | 2.991E-02 |
| TTC16     | -0.387 | 1.453E-01 | 4.863E-02 |
| PAQR8     | -0.387 | 8.665E-02 | 1.414E-01 |
| GPR83     | -0.388 | 1.123E-01 | 1.406E-04 |
| TRERF1    | -0.388 | 3.924E-03 | 3.077E-01 |
| ACSM1     | -0.388 | 1.138E-01 | 2.675E-02 |
| HHIPL2    | -0.388 | 2.500E-01 | 9.172E-01 |
| RAB39A    | -0.388 | 2.288E-01 | 7.020E-02 |
| RNF186    | -0.388 | 5.361E-01 | 1.895E-01 |

|           |        |           |           |
|-----------|--------|-----------|-----------|
| POU5F1    | -0.388 | 1.878E-01 | 6.409E-03 |
| AASS      | -0.389 | 4.872E-02 | 4.898E-02 |
| SPRR2F    | -0.389 | 5.732E-01 | 8.242E-02 |
| TMEM74B   | -0.389 | 1.091E-01 | 6.259E-02 |
| ZFYVE28   | -0.389 | 1.158E-02 | 4.677E-01 |
| ZNF682    | -0.389 | 6.902E-02 | 5.119E-01 |
| LUC7L     | -0.389 | 1.402E-03 | 7.422E-02 |
| MYH6      | -0.390 | 4.244E-01 | 4.395E-01 |
| ABCC1     | -0.390 | 5.484E-03 | 4.220E-05 |
| KYNU      | -0.390 | 1.539E-01 | 2.310E-01 |
| OR10AD1   | -0.391 | 4.001E-01 | 5.385E-02 |
| VNN1      | -0.391 | 2.422E-01 | 8.593E-04 |
| GCSAML    | -0.391 | 1.940E-01 | 2.708E-01 |
| VEGFA     | -0.392 | 2.349E-02 | 1.649E-01 |
| FSIP1     | -0.392 | 5.331E-02 | 2.174E-01 |
| OR1Q1     | -0.392 | 3.340E-01 | 3.970E-06 |
| HES4      | -0.392 | 5.358E-02 | 5.331E-03 |
| CASP5     | -0.393 | 2.991E-01 | 7.396E-02 |
| PF4V1     | -0.393 | 3.790E-01 | 7.400E-02 |
| KIAA0895L | -0.393 | 3.240E-03 | 2.786E-01 |
| MIR3929   | -0.393 | NA        | 2.031E-01 |
| SAMD9L    | -0.393 | 1.050E-01 | 5.772E-01 |
| ZNRD1     | -0.393 | 1.010E-05 | 2.158E-01 |
| FBP1      | -0.393 | 1.485E-01 | 2.206E-01 |
| TAS2R8    | -0.394 | NA        | 8.320E-05 |
| DMRTA1    | -0.394 | 3.330E-01 | 1.399E-01 |
| ITK       | -0.394 | 1.667E-01 | 2.530E-02 |
| PSTPIP2   | -0.394 | 1.664E-02 | 2.718E-02 |
| MROH7-TTC | -0.394 | 3.031E-01 | 2.171E-04 |
| SPAM1     | -0.395 | 6.516E-01 | 2.908E-02 |
| FGF13     | -0.395 | 1.013E-01 | 7.933E-02 |
| CYP2A13   | -0.395 | 6.669E-01 | 7.007E-01 |
| BCL2A1    | -0.396 | 1.817E-01 | 3.537E-01 |
| FPR2      | -0.396 | 2.555E-01 | 2.705E-02 |
| PIK3R2    | -0.396 | 2.373E-03 | 6.017E-02 |
| GLRA2     | -0.396 | 4.497E-01 | 2.210E-02 |
| GRB10     | -0.397 | 1.690E-02 | 1.222E-01 |
| FCGBP     | -0.397 | 2.273E-01 | 1.700E-06 |
| MIR3198-1 | -0.397 | 4.729E-01 | 1.155E-03 |
| GAGE13    | -0.397 | NA        | 7.650E-02 |
| GOLGA6L9  | -0.397 | 2.300E-02 | 2.662E-01 |
| BCAN      | -0.398 | 8.785E-02 | 6.248E-01 |
| CD96      | -0.398 | 8.521E-02 | 4.170E-02 |
| PDE7B     | -0.398 | 8.439E-02 | 2.872E-02 |
| MIR6776   | -0.398 | 4.808E-01 | 3.668E-02 |
| SOX6      | -0.398 | 1.902E-01 | 2.436E-02 |
| SMCP      | -0.398 | 6.219E-01 | 1.080E-02 |
| ATCAY     | -0.398 | 3.587E-01 | 1.400E-01 |
| DOCK2     | -0.399 | 1.309E-01 | 1.919E-02 |
| PRR29     | -0.399 | 3.111E-02 | 3.835E-01 |

|           |        |           |           |
|-----------|--------|-----------|-----------|
| CSN3      | -0.399 | 7.691E-01 | 3.364E-02 |
| PLCXD2    | -0.399 | 1.615E-01 | 4.184E-02 |
| PLEK2     | -0.399 | 4.869E-02 | 2.848E-01 |
| CLEC2D    | -0.399 | 8.650E-03 | 3.108E-03 |
| NIPAL4    | -0.400 | 1.452E-01 | 2.195E-01 |
| SERPINA7  | -0.400 | 6.898E-01 | 2.172E-02 |
| PKDREJ    | -0.400 | 4.402E-02 | 5.244E-02 |
| CPB2      | -0.400 | 2.922E-01 | 2.155E-02 |
| RPL34     | -0.400 | 2.686E-04 | 8.454E-04 |
| YEATS4    | -0.400 | 6.176E-03 | 3.773E-02 |
| IRX1      | -0.400 | 5.633E-01 | 3.320E-02 |
| P2RY8     | -0.400 | 9.030E-02 | 4.357E-01 |
| NTS       | -0.401 | 3.572E-01 | 3.627E-02 |
| RASA4     | -0.401 | 4.420E-02 | 5.406E-02 |
| GOLGA6L7P | -0.401 | 5.215E-01 | 2.583E-02 |
| CHKB      | -0.401 | 2.461E-03 | 7.459E-02 |
| EME2      | -0.401 | 5.710E-03 | 4.200E-05 |
| MIR23B    | -0.402 | 5.055E-01 | 3.243E-02 |
| P2RY12    | -0.402 | 2.666E-01 | 5.964E-03 |
| ACOT11    | -0.402 | 2.034E-02 | 1.909E-01 |
| EXOC3L4   | -0.402 | 1.877E-01 | 1.177E-01 |
| FAM105A   | -0.402 | 3.448E-02 | 4.210E-02 |
| CATSPERE  | -0.402 | 1.647E-02 | 5.866E-02 |
| STAP1     | -0.403 | 1.909E-01 | 4.301E-02 |
| MIR7973-1 | -0.403 | 4.962E-01 | 1.147E-01 |
| HTR3E     | -0.403 | 3.256E-01 | 2.443E-01 |
| GABRA6    | -0.403 | NA        | 5.840E-05 |
| TTC34     | -0.403 | 8.864E-02 | 4.429E-02 |
| ATG16L2   | -0.404 | 8.983E-03 | 1.173E-03 |
| C4orf50   | -0.404 | 2.909E-01 | 4.881E-02 |
| MIR6782   | -0.404 | NA        | 1.115E-01 |
| ZSWIM2    | -0.404 | NA        | 6.239E-02 |
| RAB38     | -0.404 | 1.343E-01 | 3.208E-03 |
| CD226     | -0.404 | 7.490E-02 | 1.687E-02 |
| GAGE1     | -0.404 | 7.853E-01 | 8.029E-02 |
| TERT      | -0.405 | 1.656E-01 | 6.384E-02 |
| SLC32A1   | -0.405 | 6.805E-01 | 5.004E-03 |
| ZCCHC12   | -0.405 | 1.525E-01 | 4.376E-02 |
| PCDHA4    | -0.405 | 3.714E-01 | 2.150E-06 |
| SEL1L3    | -0.405 | 1.420E-02 | 2.144E-02 |
| GPC2      | -0.405 | 1.577E-01 | 3.887E-02 |
| SLCO1A2   | -0.406 | 4.184E-01 | 3.042E-03 |
| ZSWIM6    | -0.406 | 8.290E-05 | 3.891E-03 |
| GLYAT     | -0.406 | 4.729E-01 | 6.026E-01 |
| MIR7856   | -0.406 | 2.164E-01 | 4.958E-02 |
| LPXN      | -0.406 | 3.962E-02 | 4.007E-01 |
| PTAFR     | -0.406 | 3.540E-02 | 1.620E-01 |
| SLC6A8    | -0.406 | 6.898E-02 | 3.715E-02 |
| ZAN       | -0.406 | 3.231E-01 | 2.105E-01 |
| SLC18B1   | -0.407 | 6.373E-04 | 3.210E-02 |

|            |        |           |           |
|------------|--------|-----------|-----------|
| SLC39A12   | -0.407 | 4.017E-01 | 1.640E-01 |
| CD6        | -0.407 | 1.112E-01 | 3.516E-01 |
| IPCEF1     | -0.407 | 2.718E-02 | 5.875E-02 |
| APCS       | -0.407 | 7.962E-01 | 2.143E-01 |
| GVQW2      | -0.407 | 4.641E-03 | 8.540E-02 |
| DGAT2L6    | -0.408 | 4.840E-01 | 1.862E-02 |
| RPL22L1    | -0.408 | 2.951E-03 | 6.770E-02 |
| LRRC75B    | -0.408 | 1.543E-02 | 1.103E-02 |
| SLCO5A1    | -0.408 | 2.055E-01 | 4.370E-01 |
| SLC7A8     | -0.408 | 4.005E-02 | 1.180E-01 |
| SFI1       | -0.409 | 3.441E-04 | 1.088E-02 |
| UNC45B     | -0.409 | 1.461E-01 | 5.349E-02 |
| SLC5A9     | -0.409 | 7.742E-02 | 1.199E-01 |
| RAB3IP     | -0.409 | 2.359E-02 | 6.746E-01 |
| AC022335.1 | -0.409 | NA        | 3.770E-01 |
| CLEC2B     | -0.409 | 1.258E-01 | 1.996E-01 |
| KDM4F      | -0.409 | NA        | 7.384E-02 |
| GPR171     | -0.409 | 1.573E-01 | 4.346E-01 |
| MIR4538    | -0.410 | 5.733E-01 | 2.575E-03 |
| MAGEA1     | -0.410 | 6.534E-01 | 7.386E-02 |
| SPX        | -0.410 | 2.917E-01 | 7.181E-02 |
| LMNTD1     | -0.410 | 3.293E-01 | 7.962E-03 |
| PRSS45     | -0.410 | 2.584E-01 | 2.543E-02 |
| MST1       | -0.410 | 2.675E-02 | 3.863E-04 |
| DSC3       | -0.410 | 4.114E-01 | 1.988E-03 |
| OR10G2     | -0.410 | NA        | 2.427E-02 |
| RFPL1      | -0.410 | 5.064E-01 | 9.070E-05 |
| KCNN1      | -0.411 | 1.623E-01 | 1.595E-01 |
| INSRR      | -0.411 | 2.665E-01 | 9.721E-02 |
| PTGER4     | -0.411 | 4.698E-02 | 7.935E-02 |
| LPAR3      | -0.411 | 1.721E-01 | 1.730E-01 |
| ZIC5       | -0.411 | 4.651E-01 | 1.794E-01 |
| MIR8071-1  | -0.411 | 5.348E-01 | 6.488E-02 |
| CAPN14     | -0.411 | 1.658E-01 | 1.545E-03 |
| AL645941.2 | -0.411 | 3.861E-01 | 7.598E-02 |
| DPP6       | -0.412 | 3.293E-01 | 1.460E-01 |
| AC244197.3 | -0.412 | 7.104E-02 | 3.664E-01 |
| NEUROD2    | -0.412 | 2.185E-01 | 2.504E-03 |
| CCDC194    | -0.412 | 1.980E-01 | 3.969E-01 |
| SHISA2     | -0.412 | 2.733E-01 | 6.578E-03 |
| BACH2      | -0.412 | 1.691E-01 | 5.098E-02 |
| NUTM2G     | -0.413 | 6.859E-03 | 5.742E-02 |
| CEACAM20   | -0.413 | 3.100E-01 | 1.926E-01 |
| KLK5       | -0.413 | 6.387E-01 | 6.762E-03 |
| ASPHD2     | -0.413 | 3.567E-03 | 8.212E-03 |
| MYO15B     | -0.413 | 2.321E-02 | 6.824E-02 |
| PLET1      | -0.413 | 3.906E-01 | 1.768E-01 |
| C10orf99   | -0.414 | 3.904E-01 | 7.943E-03 |
| C14orf159  | -0.414 | 1.370E-03 | 4.185E-03 |
| ANO4       | -0.414 | 1.978E-01 | 5.096E-01 |

|           |        |           |           |
|-----------|--------|-----------|-----------|
| PADI4     | -0.415 | 1.495E-01 | 5.354E-02 |
| ADIPOQ    | -0.415 | 6.722E-01 | 2.094E-02 |
| ASCL2     | -0.415 | 7.699E-02 | 4.449E-02 |
| TSPY1     | -0.415 | 8.936E-01 | 4.048E-02 |
| IRGM      | -0.415 | 1.621E-01 | 4.030E-02 |
| HORMAD1   | -0.416 | 4.361E-01 | 8.134E-02 |
| C17orf99  | -0.416 | 1.441E-01 | 2.713E-02 |
| MTRNR2L8  | -0.416 | 3.536E-02 | 1.776E-01 |
| ASIC4     | -0.416 | 1.063E-01 | 8.661E-02 |
| C16orf54  | -0.416 | 1.906E-01 | 1.092E-01 |
| ADAM20    | -0.416 | 4.958E-02 | 2.155E-02 |
| RBM44     | -0.417 | 4.318E-02 | 2.078E-03 |
| SPN       | -0.417 | 7.926E-02 | 2.050E-05 |
| CD207     | -0.417 | 2.357E-01 | 1.955E-02 |
| KRTAP5-5  | -0.417 | NA        | 5.540E-02 |
| ESRRB     | -0.417 | 1.602E-01 | 7.561E-02 |
| FAM221B   | -0.417 | 1.420E-01 | 4.762E-01 |
| NCAM2     | -0.417 | 3.402E-01 | 3.542E-03 |
| ATG9B     | -0.417 | 1.195E-01 | 5.074E-03 |
| GLRA1     | -0.417 | 3.595E-01 | 9.719E-02 |
| NAP1L6    | -0.418 | 4.289E-01 | 3.044E-01 |
| TRIM49C   | -0.418 | NA        | 2.610E-02 |
| SLC22A1   | -0.418 | 8.925E-02 | 9.582E-02 |
| CHRFAM7A  | -0.418 | 1.670E-01 | 2.219E-01 |
| CBWD3     | -0.419 | 3.822E-03 | 6.530E-02 |
| MRGPRX4   | -0.419 | 6.140E-01 | 8.832E-03 |
| MIR4648   | -0.419 | 5.434E-01 | 3.192E-01 |
| LRRD1     | -0.419 | 9.005E-02 | 2.236E-03 |
| CDRT4     | -0.419 | 1.339E-02 | 7.997E-02 |
| CLDN8     | -0.419 | 4.117E-01 | 1.169E-01 |
| HPGD      | -0.419 | 2.900E-01 | 6.720E-05 |
| GRAP2     | -0.420 | 7.996E-02 | 2.640E-01 |
| DIRAS2    | -0.420 | 4.420E-01 | 5.674E-02 |
| RFPL2     | -0.420 | 3.340E-01 | 8.873E-02 |
| ANKRD30B  | -0.420 | 4.877E-01 | 1.743E-02 |
| ISG20     | -0.420 | 6.222E-02 | 1.279E-02 |
| INPP5J    | -0.420 | 6.728E-02 | 3.040E-05 |
| 44075.000 | -0.420 | 2.361E-02 | 2.987E-02 |
| KIR3DX1   | -0.420 | 2.154E-01 | 2.368E-01 |
| PLA2G6    | -0.421 | 9.022E-03 | 3.560E-02 |
| IGFN1     | -0.421 | 3.396E-01 | 4.287E-02 |
| C1orf100  | -0.422 | 4.739E-02 | 1.738E-01 |
| TMEM8C    | -0.422 | 5.325E-01 | 1.342E-01 |
| FNDC9     | -0.422 | 1.316E-01 | 3.630E-05 |
| HMP19     | -0.422 | 3.240E-01 | 3.638E-02 |
| IL23R     | -0.422 | 1.057E-01 | 1.508E-01 |
| MYBPHL    | -0.422 | 2.909E-01 | 5.465E-01 |
| SEC14L4   | -0.423 | 3.493E-01 | 5.825E-03 |
| KRTAP8-1  | -0.423 | NA        | 1.337E-02 |
| GPD1      | -0.423 | 2.042E-01 | 3.138E-02 |



|            |        |           |           |
|------------|--------|-----------|-----------|
| LRP5L      | -0.423 | 4.406E-03 | 4.640E-07 |
| DNER       | -0.423 | 3.914E-01 | 3.739E-02 |
| ACSM2A     | -0.423 | 5.003E-01 | 6.416E-01 |
| EREG       | -0.424 | 3.782E-01 | 3.215E-01 |
| SIM1       | -0.424 | 5.650E-01 | 1.802E-03 |
| DACT2      | -0.424 | 3.331E-01 | 2.820E-02 |
| DLX1       | -0.425 | 2.854E-01 | 1.709E-01 |
| AKAIN1     | -0.425 | NA        | 2.462E-01 |
| DLL1       | -0.425 | 6.196E-02 | 2.459E-01 |
| SPACA4     | -0.426 | 2.122E-01 | 3.393E-02 |
| CARD17     | -0.426 | 3.782E-01 | 1.130E-06 |
| HOXC4      | -0.426 | 1.622E-01 | 1.903E-04 |
| GPR141     | -0.426 | 1.346E-01 | 2.035E-01 |
| MVB12B     | -0.426 | 3.881E-04 | 5.185E-02 |
| GPSM3      | -0.427 | 1.834E-02 | 2.541E-02 |
| TLR10      | -0.427 | 1.686E-01 | 5.495E-03 |
| AC233724.6 | -0.427 | NA        | 1.234E-02 |
| MIR3671    | -0.427 | 1.284E-01 | 1.301E-01 |
| MIR3649    | -0.428 | NA        | 9.544E-02 |
| CD209      | -0.429 | 1.526E-01 | 1.517E-02 |
| SLC14A1    | -0.429 | 3.084E-01 | 2.468E-01 |
| KLRF2      | -0.429 | 4.997E-01 | 5.698E-03 |
| CELA3B     | -0.429 | 5.327E-01 | 1.084E-02 |
| CNR2       | -0.429 | 2.664E-01 | 3.165E-02 |
| AIFM3      | -0.430 | 1.119E-01 | 3.273E-02 |
| MIR744     | -0.430 | 1.954E-01 | 5.219E-02 |
| TMEM82     | -0.431 | 3.507E-01 | 4.584E-02 |
| TAS2R10    | -0.431 | 1.556E-01 | 1.483E-01 |
| ALG1L      | -0.431 | 3.624E-02 | 3.289E-01 |
| BTG4       | -0.431 | 4.075E-01 | 7.350E-04 |
| EDDM13     | -0.431 | 1.186E-01 | 4.988E-02 |
| ADAM18     | -0.432 | 5.327E-01 | 2.745E-01 |
| MIR4999    | -0.432 | 3.430E-01 | 9.021E-02 |
| STON2      | -0.432 | 1.395E-02 | 1.903E-01 |
| AC005943.1 | -0.432 | 2.791E-01 | 1.185E-01 |
| SSU72P8    | -0.432 | NA        | 1.342E-01 |
| KRT16      | -0.433 | 3.470E-01 | 1.471E-03 |
| LGSN       | -0.433 | 5.316E-01 | 9.668E-04 |
| KRT5       | -0.433 | 3.973E-01 | 1.842E-02 |
| SLC26A8    | -0.434 | 4.402E-02 | 4.882E-04 |
| CARD10     | -0.434 | 1.634E-02 | 2.783E-01 |
| MROH7      | -0.434 | 9.777E-02 | 9.641E-02 |
| CCDC146    | -0.434 | 5.134E-03 | 6.793E-01 |
| CNR1       | -0.434 | 2.321E-01 | 1.017E-03 |
| BLK        | -0.435 | 3.011E-01 | 3.695E-02 |
| ANO9       | -0.435 | 4.955E-03 | 1.938E-01 |
| SIM2       | -0.435 | 3.213E-02 | 1.878E-01 |
| MIR6891    | -0.435 | 4.944E-01 | 1.130E-05 |
| CCL1       | -0.435 | 4.522E-01 | 3.907E-01 |
| ACAP1      | -0.436 | 2.915E-02 | 8.479E-02 |

|          |        |           |           |
|----------|--------|-----------|-----------|
| FAM26F   | -0.436 | 1.117E-01 | 8.799E-03 |
| AADAT    | -0.437 | 1.042E-02 | 2.697E-02 |
| SULT6B1  | -0.437 | 4.330E-01 | 3.464E-03 |
| DNAH17   | -0.437 | 1.853E-02 | 1.417E-02 |
| CLEC19A  | -0.438 | 5.259E-01 | 4.252E-03 |
| MIR4524B | -0.438 | 6.017E-01 | 4.296E-02 |
| SYTL1    | -0.438 | 1.547E-02 | 4.100E-06 |
| PTPN22   | -0.438 | 8.334E-02 | 1.977E-02 |
| CLEC6A   | -0.438 | 3.028E-01 | 3.163E-02 |
| LSP1     | -0.439 | 1.103E-01 | 4.715E-02 |
| CEBPE    | -0.439 | 1.738E-01 | 4.211E-02 |
| PRSS46   | -0.439 | 3.373E-01 | 4.210E-03 |
| DPCR1    | -0.439 | 2.993E-01 | 4.244E-02 |
| MIR548AN | -0.439 | 2.852E-01 | 4.910E-02 |
| SMIM22   | -0.439 | 1.081E-01 | 1.278E-01 |
| ANXA13   | -0.439 | 2.965E-01 | 1.849E-01 |
| MIRLET7D | -0.439 | 9.271E-02 | 9.583E-02 |
| MIR221   | -0.440 | 1.940E-01 | 2.832E-01 |
| ATP8A1   | -0.440 | 4.689E-02 | 8.352E-03 |
| CAPRIN2  | -0.440 | 1.105E-04 | 1.257E-01 |
| SLAMF7   | -0.440 | 9.557E-02 | 2.082E-01 |
| F5       | -0.440 | 2.356E-01 | 8.332E-03 |
| HSH2D    | -0.440 | 2.724E-02 | 9.691E-02 |
| NCR3     | -0.441 | 1.494E-01 | 7.667E-01 |
| GRIA1    | -0.441 | 3.872E-01 | 3.504E-02 |
| CXCL5    | -0.441 | 3.466E-01 | 1.348E-01 |
| EFCAB1   | -0.441 | 2.004E-01 | 2.173E-02 |
| CCL24    | -0.441 | 2.588E-01 | 4.816E-01 |
| LAMA1    | -0.441 | 2.170E-01 | 4.702E-02 |
| TMEM229B | -0.442 | 4.990E-03 | 2.514E-01 |
| TRPV3    | -0.442 | 9.666E-02 | 1.317E-02 |
| S1PR4    | -0.442 | 4.700E-02 | 6.853E-02 |
| PINLYP   | -0.442 | 6.761E-02 | 1.796E-02 |
| CDRT15   | -0.442 | 1.152E-01 | 4.820E-01 |
| SLC1A7   | -0.443 | 2.113E-01 | 3.380E-02 |
| CYP3A4   | -0.443 | 1.911E-01 | 7.015E-02 |
| ZBP1     | -0.443 | 1.760E-01 | 1.649E-01 |
| CD5      | -0.443 | 8.486E-02 | 3.647E-03 |
| ADAMTS20 | -0.443 | 3.587E-01 | 3.302E-01 |
| TIGIT    | -0.443 | 8.846E-02 | 1.305E-02 |
| OR52N2   | -0.444 | 5.024E-01 | 2.812E-04 |
| CRYGS    | -0.444 | 6.184E-03 | 1.556E-03 |
| TEX15    | -0.445 | 4.310E-01 | 1.589E-01 |
| MAGED4B  | -0.445 | 5.065E-01 | 1.128E-02 |
| AGER     | -0.445 | 2.666E-03 | 2.820E-01 |
| OVCH1    | -0.445 | 2.543E-01 | 6.829E-01 |
| NR1H4    | -0.445 | 4.747E-01 | 1.107E-02 |
| MNDA     | -0.445 | 1.001E-01 | 8.910E-02 |
| CD79A    | -0.445 | 2.335E-01 | 1.105E-01 |
| RETNLB   | -0.446 | 3.796E-01 | 2.787E-01 |

|           |        |           |           |
|-----------|--------|-----------|-----------|
| TLR4      | -0.446 | 1.710E-02 | 8.781E-02 |
| FAM9A     | -0.446 | NA        | 5.249E-03 |
| LIM2      | -0.446 | 5.475E-01 | 1.076E-01 |
| POU2AF1   | -0.447 | 1.577E-01 | 3.066E-01 |
| WDFY4     | -0.447 | 1.134E-01 | 9.483E-02 |
| STXBP5L   | -0.447 | 2.752E-01 | 5.058E-01 |
| BCL2L14   | -0.448 | 6.181E-02 | 4.404E-04 |
| MAF       | -0.448 | 2.724E-02 | 2.538E-01 |
| OAS1      | -0.448 | 6.005E-03 | 4.353E-02 |
| C1orf68   | -0.448 | 6.004E-01 | 1.507E-01 |
| FGD5      | -0.448 | 3.518E-02 | 3.880E-02 |
| TNN       | -0.448 | 1.817E-01 | 2.137E-02 |
| SH2D1B    | -0.449 | 5.207E-02 | 5.494E-02 |
| C6orf141  | -0.449 | 1.788E-01 | 4.720E-02 |
| FAM163B   | -0.450 | 2.285E-01 | 1.074E-01 |
| CHRNA3    | -0.450 | 5.050E-01 | 4.889E-02 |
| CLPS      | -0.450 | 5.205E-01 | 2.039E-01 |
| POU5F1B   | -0.450 | 2.595E-02 | 9.112E-02 |
| KRTAP20-2 | -0.450 | NA        | 4.112E-02 |
| VAX1      | -0.450 | 5.260E-01 | 3.018E-02 |
| EHD3      | -0.451 | 4.762E-03 | 5.529E-02 |
| MMP28     | -0.451 | 9.585E-02 | 7.689E-02 |
| PIEZO2    | -0.452 | 5.494E-02 | 3.948E-02 |
| HOXD1     | -0.452 | 1.486E-01 | 1.355E-02 |
| ZNF804A   | -0.452 | 1.352E-01 | 1.699E-01 |
| IRF4      | -0.452 | 1.146E-01 | 3.109E-01 |
| CABYR     | -0.452 | 5.379E-02 | 6.790E-03 |
| OR2K2     | -0.452 | NA        | 1.077E-01 |
| PTX4      | -0.452 | 2.071E-01 | 6.383E-02 |
| HOXA1     | -0.453 | 1.128E-02 | 2.645E-03 |
| OR52E2    | -0.453 | NA        | 5.892E-01 |
| NOL4      | -0.453 | 3.464E-01 | 3.341E-03 |
| TRIM74    | -0.453 | 5.331E-02 | 1.189E-01 |
| KRTAP2-2  | -0.453 | NA        | 4.862E-03 |
| POLN      | -0.453 | 2.947E-02 | 1.615E-02 |
| CHRNA2    | -0.453 | 1.137E-01 | 1.440E-05 |
| CD48      | -0.453 | 1.118E-01 | 3.920E-03 |
| CPT1B     | -0.453 | 6.562E-03 | 1.354E-01 |
| TAC1      | -0.453 | 4.769E-01 | 3.432E-02 |
| FRMD3     | -0.454 | 3.088E-02 | 1.122E-02 |
| DHRS3     | -0.454 | 1.848E-02 | 1.483E-03 |
| CCL18     | -0.455 | 2.463E-01 | 2.479E-02 |
| ZBP1      | -0.455 | 5.346E-01 | 4.315E-02 |
| SLAMF6    | -0.455 | 1.292E-01 | 9.136E-02 |
| GCK       | -0.455 | 7.285E-02 | 6.278E-03 |
| MIR4297   | -0.455 | 4.876E-01 | 1.474E-03 |
| IHH       | -0.455 | 3.842E-01 | 2.196E-02 |
| MIR135A1  | -0.455 | 2.214E-02 | 3.176E-02 |
| BATF2     | -0.455 | 1.132E-01 | 8.116E-02 |
| GOLGA6L10 | -0.456 | 1.989E-02 | 1.749E-02 |

|            |        |           |           |
|------------|--------|-----------|-----------|
| FAM159B    | -0.456 | 8.987E-02 | 4.200E-04 |
| PRL        | -0.456 | 3.740E-01 | 7.019E-02 |
| CRHR1      | -0.456 | 3.231E-01 | 2.067E-01 |
| TMCO5A     | -0.457 | 6.779E-01 | 3.510E-03 |
| TBX18      | -0.457 | 1.940E-01 | 1.406E-02 |
| HOXD4      | -0.457 | 1.073E-01 | 3.251E-02 |
| TUBA8      | -0.457 | 1.162E-02 | 2.021E-02 |
| SYCP3      | -0.458 | 1.708E-02 | 4.064E-01 |
| SCN1A      | -0.458 | 4.020E-01 | 2.792E-01 |
| SLITRK5    | -0.458 | 3.375E-01 | 2.773E-01 |
| BCL2L10    | -0.458 | 7.926E-02 | 4.556E-03 |
| POU3F4     | -0.458 | 5.996E-01 | 1.009E-01 |
| KY         | -0.458 | 1.098E-01 | 4.533E-02 |
| TMEM27     | -0.459 | 2.002E-02 | 7.159E-02 |
| ZNF831     | -0.459 | 1.170E-01 | 4.875E-02 |
| ICOS       | -0.459 | 1.104E-01 | 3.831E-04 |
| SLC16A9    | -0.459 | 1.428E-01 | 4.304E-02 |
| AOC1       | -0.459 | 2.399E-01 | 2.205E-02 |
| MIR1273C   | -0.459 | NA        | 6.690E-02 |
| NANOS2     | -0.459 | 4.889E-01 | 3.078E-02 |
| ARTN       | -0.460 | 4.599E-02 | 3.225E-01 |
| TBC1D3L    | -0.460 | 1.076E-01 | 5.077E-01 |
| MIR7854    | -0.460 | 3.122E-01 | 2.181E-01 |
| ABCC3      | -0.460 | 6.705E-02 | 1.193E-02 |
| SEMA4G     | -0.461 | 3.722E-02 | 3.976E-02 |
| GPR25      | -0.461 | 2.161E-01 | 2.898E-04 |
| Z83844.1   | -0.462 | 3.904E-02 | 3.598E-04 |
| NUDT11     | -0.462 | 1.664E-01 | 1.725E-01 |
| DEFB118    | -0.462 | 6.002E-01 | 8.894E-03 |
| GJA3       | -0.462 | 2.226E-01 | 3.097E-01 |
| MOGAT1     | -0.463 | 3.428E-01 | 8.018E-03 |
| GSDMA      | -0.463 | 9.728E-02 | 5.001E-03 |
| MYF6       | -0.463 | 4.490E-01 | 4.851E-01 |
| IL31       | -0.464 | NA        | 2.058E-03 |
| CCR5       | -0.464 | 8.429E-02 | 4.157E-02 |
| NTRK1      | -0.464 | 7.090E-02 | 3.420E-02 |
| GPT        | -0.465 | 4.407E-02 | 1.236E-01 |
| C9orf84    | -0.465 | 4.527E-02 | 1.324E-01 |
| ADAMDEC1   | -0.465 | 1.830E-01 | 7.000E-02 |
| GOLGA8A    | -0.465 | 2.434E-02 | 2.476E-04 |
| SMIM24     | -0.466 | 6.852E-02 | 6.722E-02 |
| PAEP       | -0.466 | 3.472E-01 | 2.846E-01 |
| PNMA3      | -0.467 | 1.443E-01 | 1.297E-02 |
| KCNJ2      | -0.467 | 1.690E-02 | 9.952E-02 |
| MAPK8IP3   | -0.467 | 7.620E-04 | 1.886E-02 |
| AC026461.4 | -0.467 | 4.945E-01 | 8.170E-05 |
| KRTAP5-9   | -0.467 | 2.206E-01 | 2.098E-02 |
| LRRC4      | -0.467 | 7.212E-02 | 1.562E-03 |
| BCAM       | -0.467 | 2.595E-02 | 9.533E-02 |
| DTHD1      | -0.468 | 1.608E-01 | 4.457E-01 |

|            |        |           |           |
|------------|--------|-----------|-----------|
| SPRR2B     | -0.468 | 6.204E-01 | 3.166E-01 |
| C20orf141  | -0.468 | 4.854E-01 | 2.850E-01 |
| OR4D10     | -0.468 | NA        | 4.827E-02 |
| OR2H2      | -0.468 | 3.339E-01 | 8.161E-02 |
| CYP2A6     | -0.469 | 3.154E-01 | 3.375E-01 |
| KRT15      | -0.469 | 2.143E-01 | 1.707E-03 |
| ICAM3      | -0.469 | 6.086E-02 | 1.797E-02 |
| RASL10A    | -0.469 | 7.108E-02 | 4.634E-03 |
| LMAN1L     | -0.469 | 5.197E-01 | 1.847E-03 |
| TMIGD2     | -0.469 | 3.515E-02 | 6.666E-02 |
| ABCD2      | -0.470 | 9.291E-02 | 5.952E-02 |
| AL845331.2 | -0.470 | 3.970E-01 | 1.195E-02 |
| KLF15      | -0.470 | 8.243E-02 | 1.549E-01 |
| IL26       | -0.470 | 2.570E-01 | 1.558E-03 |
| STAR       | -0.471 | 9.457E-02 | 2.457E-02 |
| SLC3A1     | -0.471 | 5.212E-02 | 4.911E-03 |
| TMEM163    | -0.471 | 1.196E-01 | 3.970E-02 |
| HOXC13     | -0.471 | 1.395E-01 | 8.790E-02 |
| MIR3680-1  | -0.471 | 2.934E-01 | 3.615E-03 |
| SIGLEC10   | -0.471 | 8.696E-02 | 3.641E-02 |
| CD2        | -0.471 | 8.247E-02 | 1.320E-02 |
| MIR27B     | -0.471 | 3.197E-01 | 6.616E-01 |
| TGM4       | -0.472 | 7.945E-02 | 7.640E-08 |
| PLIN5      | -0.472 | 1.349E-01 | 3.530E-07 |
| SORCS3     | -0.472 | 5.099E-01 | 2.410E-01 |
| KCNAB3     | -0.473 | 6.247E-03 | 7.298E-02 |
| SESN3      | -0.473 | 2.142E-02 | 1.927E-01 |
| S100G      | -0.473 | 5.927E-01 | 1.851E-02 |
| GCNA       | -0.473 | 5.740E-03 | 2.713E-01 |
| RTP5       | -0.473 | 2.570E-01 | 1.282E-01 |
| C8orf22    | -0.473 | 5.287E-01 | 1.751E-02 |
| ENPP2      | -0.473 | 2.764E-02 | 2.234E-02 |
| CST9L      | -0.473 | 6.128E-01 | 8.655E-04 |
| SASH3      | -0.474 | 6.804E-02 | 1.255E-02 |
| ITGAL      | -0.474 | 5.835E-02 | 4.115E-02 |
| MIR1302-3  | -0.474 | 1.442E-01 | 1.120E-02 |
| ODAM       | -0.475 | 3.085E-01 | 5.231E-02 |
| SLC45A3    | -0.475 | 9.007E-03 | 2.552E-02 |
| TBC1D26    | -0.475 | 2.131E-01 | 4.073E-02 |
| CTLA4      | -0.476 | 8.185E-02 | 6.910E-03 |
| PRODH2     | -0.476 | 5.510E-01 | 2.686E-02 |
| PTGR1      | -0.476 | 2.951E-02 | 1.691E-02 |
| PYROXD2    | -0.476 | 1.610E-02 | 6.888E-03 |
| CYP4F2     | -0.476 | 3.326E-01 | 6.776E-02 |
| FAM151A    | -0.477 | 3.144E-03 | 2.339E-04 |
| AMHR2      | -0.477 | 1.108E-01 | 5.501E-04 |
| TLX1       | -0.477 | 3.923E-01 | 1.658E-03 |
| AC091980.2 | -0.477 | 5.316E-01 | 8.806E-02 |
| CDK5R2     | -0.477 | 2.190E-01 | 1.079E-01 |
| TESPA1     | -0.477 | 4.805E-02 | 3.589E-02 |

|            |        |           |           |
|------------|--------|-----------|-----------|
| SCIMP      | -0.478 | 7.285E-02 | 1.875E-01 |
| ATF7IP2    | -0.478 | 2.050E-02 | 2.298E-01 |
| CALB1      | -0.478 | 3.493E-01 | 1.381E-02 |
| F2RL1      | -0.478 | 1.694E-02 | 4.003E-02 |
| SPATA22    | -0.478 | 3.705E-01 | 1.536E-01 |
| CFHR3      | -0.478 | 5.758E-02 | 1.158E-02 |
| CCDC27     | -0.479 | 3.189E-01 | 1.192E-02 |
| GLDC       | -0.479 | 2.269E-01 | 2.750E-05 |
| NT5C1A     | -0.479 | 3.841E-01 | 3.409E-02 |
| ZNF157     | -0.479 | 1.971E-01 | 1.046E-02 |
| MIR6807    | -0.479 | 4.134E-01 | 1.720E-01 |
| LHX9       | -0.479 | 2.538E-01 | 1.487E-02 |
| ASMT       | -0.479 | 5.616E-02 | 2.735E-03 |
| ARC        | -0.479 | 1.207E-01 | 2.004E-02 |
| AC099489.1 | -0.479 | 1.973E-02 | 4.405E-02 |
| AIPL1      | -0.480 | 3.661E-01 | 6.406E-02 |
| EFNB3      | -0.480 | 6.806E-02 | 6.139E-02 |
| CAPNS2     | -0.480 | 2.154E-01 | 3.334E-02 |
| NEU4       | -0.480 | 1.328E-01 | 8.509E-01 |
| SLC26A9    | -0.480 | 1.814E-01 | 2.400E-02 |
| RPL39L     | -0.480 | 1.475E-01 | 7.802E-03 |
| GOLGA8F    | -0.481 | 4.812E-01 | 5.002E-01 |
| DEGS2      | -0.481 | 1.227E-01 | 2.791E-02 |
| OR5A1      | -0.481 | NA        | 2.623E-01 |
| ZNF735     | -0.481 | NA        | 3.675E-02 |
| DDX4       | -0.481 | 2.038E-01 | 2.095E-01 |
| KANK4      | -0.481 | 2.994E-01 | 2.806E-01 |
| PTPRZ1     | -0.482 | 4.220E-01 | 5.078E-02 |
| MUC6       | -0.482 | 2.082E-01 | 6.628E-03 |
| LRMP       | -0.482 | 6.257E-02 | 3.700E-02 |
| AATK-AS1   | -0.482 | 4.672E-01 | 2.016E-02 |
| CYP39A1    | -0.482 | 4.318E-02 | 1.217E-03 |
| AL121594.3 | -0.482 | 1.973E-03 | 2.832E-01 |
| MCTP2      | -0.482 | 3.318E-03 | 7.259E-03 |
| HIST1H4L   | -0.483 | 3.728E-01 | 1.976E-03 |
| SP7        | -0.483 | 3.473E-01 | 3.604E-02 |
| LYPD2      | -0.483 | 3.735E-01 | 2.464E-02 |
| NUDT10     | -0.483 | 1.717E-01 | 1.232E-01 |
| DHRS2      | -0.483 | 2.582E-01 | 7.304E-02 |
| NPSR1      | -0.483 | 2.983E-01 | 1.952E-01 |
| LHCGR      | -0.483 | 3.238E-01 | 1.313E-01 |
| HR         | -0.483 | 6.975E-02 | 1.302E-01 |
| ADRB2      | -0.483 | 6.633E-02 | 4.316E-01 |
| GCNT1      | -0.484 | 6.902E-02 | 4.838E-02 |
| NAT8       | -0.484 | 1.846E-01 | 4.195E-02 |
| AMZ1       | -0.484 | 1.224E-01 | 1.830E-04 |
| TDRD12     | -0.485 | 6.731E-02 | 1.562E-03 |
| MIR3193    | -0.485 | 3.840E-01 | 4.000E-03 |
| HIST1H4G   | -0.485 | NA        | 2.420E-01 |
| LDHB       | -0.486 | 8.290E-05 | 5.178E-02 |

|           |        |           |           |
|-----------|--------|-----------|-----------|
| TM4SF5    | -0.486 | 3.473E-01 | 1.159E-01 |
| TBC1D10C  | -0.486 | 5.027E-02 | 9.050E-03 |
| RFX6      | -0.487 | 4.250E-01 | 2.223E-01 |
| STK32A    | -0.487 | 1.548E-01 | 2.677E-02 |
| KCNJ10    | -0.487 | 5.792E-02 | 5.133E-01 |
| CCR6      | -0.487 | 1.835E-01 | 1.445E-01 |
| NPIP6     | -0.487 | 9.109E-02 | 2.160E-05 |
| FAM162A   | -0.487 | 1.680E-04 | 3.345E-02 |
| C10orf62  | -0.488 | 2.719E-01 | 4.519E-02 |
| KRTAP5-7  | -0.488 | 2.573E-01 | 1.978E-02 |
| NLRP1     | -0.488 | 2.748E-03 | 4.578E-02 |
| NLRC3     | -0.488 | 8.128E-03 | 1.447E-02 |
| LTB4R     | -0.489 | 1.666E-02 | 3.097E-02 |
| SLC37A2   | -0.489 | 6.831E-03 | 4.318E-01 |
| TLR8      | -0.489 | 1.284E-01 | 1.208E-02 |
| FGFR3     | -0.489 | 1.254E-01 | 2.372E-02 |
| LMX1A     | -0.490 | 4.617E-01 | 5.116E-04 |
| PPP1R16B  | -0.490 | 1.724E-02 | 1.192E-01 |
| FAM46D    | -0.490 | 3.671E-01 | 4.106E-02 |
| SCN4A     | -0.491 | 1.192E-01 | 4.746E-03 |
| TRIM73    | -0.491 | 1.457E-02 | 6.983E-03 |
| HOXC11    | -0.491 | 1.932E-01 | 2.928E-02 |
| BOLL      | -0.491 | 1.221E-01 | 1.999E-01 |
| NCKAP5    | -0.492 | 5.764E-02 | 2.091E-02 |
| C8orf4    | -0.492 | 5.099E-02 | 1.693E-02 |
| OR5M11    | -0.492 | 3.309E-01 | 1.712E-01 |
| UST       | -0.492 | 7.903E-03 | 2.054E-02 |
| IL12RB2   | -0.492 | 1.557E-01 | 2.046E-01 |
| CCL4L2    | -0.493 | 9.314E-02 | 3.613E-03 |
| TECTB     | -0.493 | 4.068E-01 | 5.130E-02 |
| C8orf34   | -0.494 | 1.132E-01 | 4.667E-02 |
| IKZF1     | -0.494 | 4.300E-02 | 2.163E-01 |
| CR1L      | -0.494 | 1.234E-01 | 7.690E-02 |
| KRTAP21-1 | -0.494 | NA        | 1.016E-02 |
| EPHB1     | -0.496 | 4.162E-02 | 5.537E-02 |
| S100Z     | -0.496 | 5.925E-02 | 3.592E-02 |
| TLL2      | -0.496 | 3.220E-01 | 2.273E-02 |
| TRIM67    | -0.496 | 2.556E-02 | 1.758E-02 |
| MIR503    | -0.496 | NA        | 6.450E-03 |
| SAMSN1    | -0.496 | 3.814E-02 | 5.947E-02 |
| FKBP1B    | -0.496 | 1.957E-02 | 3.823E-02 |
| MC4R      | -0.497 | 3.917E-01 | 1.289E-02 |
| IL6R      | -0.497 | 1.042E-02 | 9.080E-02 |
| MIR4539   | -0.497 | 4.744E-01 | 1.590E-01 |
| KDM4E     | -0.498 | 3.697E-01 | 1.702E-02 |
| TVP23A    | -0.499 | 2.943E-03 | 7.134E-02 |
| CCKAR     | -0.499 | 5.909E-01 | 4.127E-01 |
| XAF1      | -0.499 | 2.867E-02 | 2.959E-02 |
| GABBR1    | -0.499 | 9.841E-03 | 8.340E-04 |
| NPFFR1    | -0.499 | 7.483E-02 | 3.665E-01 |

|            |        |           |           |
|------------|--------|-----------|-----------|
| TMEM155    | -0.499 | 5.212E-02 | 9.513E-02 |
| TSPAN1     | -0.500 | 1.046E-01 | 1.263E-03 |
| FAT2       | -0.500 | 1.526E-01 | 2.685E-03 |
| TBC1D28    | -0.501 | NA        | 1.584E-01 |
| KREMEN2    | -0.501 | 5.998E-02 | 4.236E-02 |
| IL1R2      | -0.502 | 8.356E-02 | 1.525E-02 |
| TBC1D3E    | -0.502 | 2.689E-01 | 1.246E-01 |
| TNFSF14    | -0.502 | 4.299E-02 | 5.396E-04 |
| CHRNA7     | -0.502 | 1.387E-01 | 8.033E-02 |
| SYT6       | -0.502 | 1.131E-01 | 3.751E-01 |
| FBN3       | -0.502 | 2.986E-01 | 6.653E-03 |
| FP565260.2 | -0.503 | 3.406E-01 | 5.783E-02 |
| SYT8       | -0.503 | 1.560E-01 | 1.328E-01 |
| MIR31      | -0.504 | 4.490E-01 | 4.986E-02 |
| NPNT       | -0.504 | 5.782E-02 | 1.576E-01 |
| VSTM1      | -0.504 | 1.833E-01 | 1.425E-01 |
| GAD1       | -0.504 | 9.746E-02 | 1.907E-03 |
| LRRC18     | -0.504 | 1.585E-01 | 1.182E-01 |
| NMUR2      | -0.505 | 2.480E-01 | 3.336E-02 |
| FCMR       | -0.505 | 3.663E-02 | 1.135E-04 |
| PAK3       | -0.505 | 1.626E-01 | 2.732E-02 |
| FOXQ1      | -0.505 | 8.590E-02 | 2.439E-02 |
| DRD2       | -0.505 | 1.503E-01 | 7.016E-03 |
| C15orf53   | -0.506 | 1.757E-01 | 2.594E-01 |
| MIR514B    | -0.506 | NA        | 6.705E-03 |
| BPIFA1     | -0.506 | 5.540E-01 | 6.110E-03 |
| GDPD4      | -0.506 | 1.234E-01 | 4.395E-02 |
| ASCL3      | -0.507 | 3.996E-01 | 8.482E-02 |
| FAM47C     | -0.507 | 3.795E-01 | 9.541E-02 |
| AADA4L4    | -0.508 | 5.045E-01 | 6.143E-02 |
| MAP4K1     | -0.508 | 2.750E-02 | 1.102E-01 |
| ZAP70      | -0.508 | 4.340E-02 | 3.826E-01 |
| SAMD5      | -0.508 | 5.256E-02 | 3.308E-02 |
| NTF3       | -0.508 | 6.047E-02 | 1.445E-01 |
| ABHD12B    | -0.508 | 2.552E-02 | 1.473E-02 |
| TSPAN32    | -0.508 | 2.769E-02 | 2.027E-01 |
| CTSC       | -0.508 | 5.603E-03 | 1.642E-04 |
| ABCC4      | -0.509 | 4.225E-03 | 1.606E-01 |
| LCN9       | -0.510 | NA        | 2.699E-02 |
| CD3E       | -0.510 | 4.974E-02 | 9.026E-03 |
| TBC1D3G    | -0.510 | 2.830E-01 | 1.451E-01 |
| PRR22      | -0.510 | 4.442E-03 | 7.311E-04 |
| GOLGA8B    | -0.511 | 8.189E-03 | 5.909E-03 |
| PAX9       | -0.511 | 4.197E-02 | 5.929E-02 |
| FCER2      | -0.511 | 2.550E-01 | 1.095E-03 |
| OVGP1      | -0.512 | 4.114E-02 | 2.873E-01 |
| FCRL3      | -0.512 | 1.343E-01 | 9.500E-02 |
| CCL3       | -0.512 | 6.877E-02 | 9.509E-03 |
| CACNG7     | -0.512 | 3.478E-01 | 1.022E-01 |
| DPPA3      | -0.513 | 5.749E-01 | 7.660E-03 |



|           |        |           |           |
|-----------|--------|-----------|-----------|
| IL2RB     | -0.513 | 2.817E-02 | 5.275E-01 |
| RGS6      | -0.513 | 1.088E-01 | 2.091E-01 |
| NCR2      | -0.513 | 4.378E-01 | 1.012E-01 |
| OASL      | -0.513 | 3.205E-02 | 1.685E-01 |
| LINC00521 | -0.513 | 3.857E-01 | 1.853E-02 |
| SMIM23    | -0.513 | 2.755E-01 | 5.479E-02 |
| NPHS2     | -0.514 | 5.070E-01 | 2.775E-02 |
| CORO1A    | -0.514 | 1.479E-02 | 5.953E-03 |
| EIF4E1B   | -0.514 | 5.729E-01 | 9.808E-03 |
| CARMIL3   | -0.514 | 1.186E-02 | 8.473E-02 |
| KLHL3     | -0.514 | 2.680E-03 | 5.288E-02 |
| MYO3B     | -0.514 | 1.550E-01 | 2.518E-02 |
| DNAH8     | -0.515 | 1.132E-01 | 1.959E-01 |
| FGF21     | -0.515 | 4.634E-01 | 4.967E-01 |
| ATP8A2    | -0.515 | 4.702E-02 | 4.030E-03 |
| CNTN5     | -0.516 | 2.924E-01 | 5.231E-04 |
| AATK      | -0.516 | 2.798E-03 | 2.896E-02 |
| SPANXN3   | -0.517 | NA        | 7.241E-03 |
| SOX21     | -0.517 | 3.028E-01 | 1.067E-03 |
| RTL9      | -0.517 | 1.108E-01 | 3.415E-03 |
| MAP3K15   | -0.518 | 4.502E-02 | 2.637E-02 |
| COL27A1   | -0.518 | 9.051E-03 | 4.396E-02 |
| BEST2     | -0.518 | 2.195E-01 | 3.212E-03 |
| CXCR3     | -0.519 | 6.806E-02 | 2.342E-02 |
| ITIH1     | -0.519 | 2.685E-01 | 3.920E-02 |
| RASSF6    | -0.519 | 3.595E-02 | 8.757E-03 |
| KCTD19    | -0.519 | 8.809E-02 | 5.348E-02 |
| KCNH8     | -0.520 | 1.616E-01 | 4.847E-02 |
| LYPD4     | -0.520 | 3.725E-01 | 1.428E-01 |
| AMY2A     | -0.520 | 5.020E-01 | 2.301E-02 |
| ACSM6     | -0.520 | 3.283E-01 | 4.936E-01 |
| CD69      | -0.520 | 6.938E-02 | 7.585E-03 |
| KRTAP21-2 | -0.521 | NA        | 3.413E-01 |
| PPP2R2C   | -0.521 | 2.051E-01 | 2.754E-02 |
| MIR6889   | -0.521 | 2.920E-01 | 6.002E-01 |
| CLNK      | -0.522 | 2.427E-02 | 2.388E-04 |
| GPC3      | -0.522 | 1.023E-01 | 4.246E-01 |
| ODF3L1    | -0.522 | 1.985E-02 | 1.465E-02 |
| MYO1G     | -0.522 | 2.889E-02 | 9.651E-02 |
| OR2A25    | -0.522 | NA        | 4.191E-04 |
| CDH13     | -0.523 | 1.740E-02 | 6.085E-02 |
| RASSF10   | -0.523 | 8.003E-02 | 4.025E-02 |
| OLFM4     | -0.523 | 3.736E-01 | 3.395E-02 |
| RGPD3     | -0.524 | 4.745E-02 | 3.692E-03 |
| OBSCN     | -0.524 | 3.835E-03 | 1.201E-01 |
| MTRNR2L10 | -0.524 | 3.478E-02 | 1.929E-01 |
| CACNG5    | -0.524 | 5.410E-01 | 6.856E-02 |
| CLEC18C   | -0.525 | 1.876E-01 | 2.991E-01 |
| B3GALNT1  | -0.525 | 6.793E-04 | 1.203E-02 |
| ARL14     | -0.525 | 1.368E-01 | 3.171E-02 |

|           |        |           |           |
|-----------|--------|-----------|-----------|
| NCR3LG1   | -0.525 | 1.627E-02 | 2.181E-02 |
| TRHR      | -0.525 | NA        | 4.308E-01 |
| AOC2      | -0.525 | 3.245E-02 | 2.947E-02 |
| OBP2A     | -0.525 | 1.887E-01 | 3.496E-02 |
| TMEM200C  | -0.526 | 5.351E-02 | 3.091E-01 |
| PLA2G4E   | -0.526 | 2.566E-01 | 4.062E-02 |
| DQX1      | -0.526 | 3.111E-02 | 2.804E-01 |
| CAMKV     | -0.527 | 1.719E-01 | 2.791E-02 |
| KLKB1     | -0.527 | 4.884E-02 | 4.378E-02 |
| MIR27A    | -0.527 | 2.019E-01 | 3.977E-02 |
| TMIGD1    | -0.527 | 4.836E-01 | 4.609E-01 |
| CYP4A11   | -0.528 | 1.178E-01 | 3.800E-02 |
| GGT1      | -0.528 | 1.354E-02 | 1.839E-01 |
| CLIC6     | -0.528 | 1.583E-01 | 4.501E-01 |
| LRRC14B   | -0.528 | 1.950E-01 | 1.213E-01 |
| CACNA2D3  | -0.528 | 3.836E-02 | 4.130E-06 |
| LDHC      | -0.528 | 2.927E-01 | 2.687E-02 |
| CSAG2     | -0.529 | 3.259E-01 | 4.845E-02 |
| CLEC4D    | -0.529 | 1.150E-01 | 1.076E-01 |
| PTPRC     | -0.529 | 4.561E-02 | 9.681E-02 |
| CDH9      | -0.530 | 5.535E-01 | 5.009E-03 |
| CCT2      | -0.530 | 1.940E-04 | 2.854E-03 |
| SPATA31A1 | -0.530 | NA        | 1.232E-01 |
| RNF183    | -0.530 | 1.607E-01 | 1.417E-02 |
| MFAP3L    | -0.530 | 2.712E-02 | 1.537E-02 |
| SLC7A4    | -0.530 | 1.341E-01 | 3.849E-02 |
| MIR6881   | -0.530 | 3.356E-01 | 3.210E-03 |
| KLK9      | -0.530 | 6.348E-01 | 3.365E-01 |
| C8B       | -0.531 | 4.398E-01 | 7.487E-02 |
| OTP       | -0.531 | 1.616E-01 | 4.527E-02 |
| MIR4285   | -0.531 | NA        | 2.801E-02 |
| DACH2     | -0.531 | 2.313E-01 | 3.900E-03 |
| GJD3      | -0.531 | 5.695E-02 | 7.754E-03 |
| AKAP4     | -0.531 | NA        | 3.654E-03 |
| WARS      | -0.532 | 3.341E-02 | 3.172E-02 |
| TRPM6     | -0.532 | 4.508E-02 | 8.108E-04 |
| MIR4537   | -0.532 | 4.530E-01 | 2.793E-01 |
| FAM181A   | -0.532 | 3.293E-01 | 3.503E-02 |
| ANP32D    | -0.533 | 1.794E-01 | 1.395E-01 |
| PIK3AP1   | -0.533 | 2.978E-02 | 5.553E-03 |
| CHI3L2    | -0.533 | 9.582E-02 | 9.490E-05 |
| TMEM95    | -0.534 | 1.393E-01 | 1.110E-03 |
| HSD17B13  | -0.534 | 2.624E-02 | 1.184E-01 |
| CXXC4     | -0.535 | 3.714E-02 | 5.111E-03 |
| CYP26C1   | -0.535 | 8.846E-02 | 5.357E-02 |
| MS4A1     | -0.535 | 2.449E-01 | 8.726E-03 |
| TRPC5OS   | -0.535 | 1.984E-01 | 1.218E-01 |
| KRT76     | -0.536 | 2.768E-01 | 8.974E-03 |
| RHOXF2B   | -0.536 | 7.506E-01 | 7.206E-02 |
| HSD17B3   | -0.537 | 9.092E-02 | 2.780E-02 |

|            |        |           |           |
|------------|--------|-----------|-----------|
| HLA-G      | -0.537 | 1.707E-02 | 9.160E-06 |
| CD40       | -0.537 | 8.650E-03 | 4.154E-02 |
| SPRR4      | -0.537 | 3.807E-01 | 1.348E-02 |
| TCERG1L    | -0.537 | 2.839E-01 | 2.614E-01 |
| C4BPA      | -0.537 | 2.770E-01 | 7.825E-01 |
| DFNA5      | -0.537 | 1.456E-02 | 1.865E-02 |
| OXGR1      | -0.537 | 9.259E-02 | 1.376E-02 |
| IDO2       | -0.538 | 5.983E-02 | 7.565E-03 |
| FMO3       | -0.539 | 7.964E-02 | 2.854E-03 |
| FAM25C     | -0.539 | 4.223E-01 | 4.315E-02 |
| CHCHD10    | -0.539 | 8.957E-04 | 3.240E-02 |
| SLFN12L    | -0.539 | 3.252E-02 | 2.882E-03 |
| ZNF385A    | -0.539 | 1.644E-03 | 2.140E-01 |
| FYB        | -0.540 | 5.181E-02 | 6.268E-03 |
| DUSP27     | -0.540 | 3.358E-01 | 1.955E-02 |
| CST1       | -0.540 | 1.940E-01 | 2.682E-02 |
| EPGN       | -0.541 | 2.324E-01 | 1.115E-03 |
| GRIA2      | -0.541 | 2.531E-01 | 1.358E-01 |
| ID1        | -0.541 | 1.043E-02 | 1.218E-01 |
| CYP4A22    | -0.542 | 1.722E-01 | 1.700E-02 |
| CYP2C8     | -0.542 | 9.975E-02 | 1.287E-02 |
| KBTBD8     | -0.542 | 4.412E-03 | 1.490E-01 |
| C2orf82    | -0.542 | 3.055E-03 | 4.640E-08 |
| CYP3A7     | -0.543 | 6.633E-02 | 1.619E-02 |
| NPIPA8     | -0.543 | 3.807E-01 | 2.325E-03 |
| NLRP10     | -0.543 | 2.313E-01 | 8.096E-04 |
| SIT1       | -0.543 | 5.352E-02 | 3.048E-02 |
| KIT        | -0.544 | 7.581E-02 | 5.765E-03 |
| RBMY1F     | -0.544 | NA        | 8.824E-03 |
| HOGA1      | -0.544 | 5.550E-02 | 1.296E-02 |
| PAK5       | -0.544 | 2.891E-01 | 3.668E-04 |
| SERPINB10  | -0.545 | 3.094E-01 | 3.891E-01 |
| UBASH3A    | -0.545 | 3.884E-02 | 7.270E-06 |
| SLC45A2    | -0.545 | 1.107E-01 | 3.859E-03 |
| FATE1      | -0.546 | 3.657E-02 | 4.759E-02 |
| FAM155B    | -0.546 | 1.332E-01 | 2.784E-02 |
| TPH2       | -0.546 | 2.757E-01 | 1.441E-02 |
| FGFBP2     | -0.546 | 8.207E-02 | 7.279E-02 |
| AC097372.1 | -0.547 | 1.679E-01 | 4.576E-03 |
| BIRC3      | -0.547 | 3.536E-02 | 1.837E-03 |
| LRRC19     | -0.547 | 4.407E-02 | 8.457E-02 |
| FRS2       | -0.547 | 9.516E-04 | 1.602E-02 |
| CCL4       | -0.549 | 4.798E-02 | 1.254E-02 |
| SH2D1A     | -0.549 | 5.236E-02 | 4.789E-02 |
| APOL1      | -0.549 | 1.128E-02 | 1.002E-02 |
| TSPAN19    | -0.550 | 3.931E-01 | 5.974E-02 |
| CXCR6      | -0.550 | 2.141E-02 | 1.166E-02 |
| ARG1       | -0.550 | 1.805E-02 | 5.075E-03 |
| MIR649     | -0.550 | NA        | 3.603E-02 |
| GDA        | -0.550 | 1.877E-01 | 2.436E-01 |

|            |        |           |           |
|------------|--------|-----------|-----------|
| PLAC8      | -0.551 | 7.118E-02 | 1.896E-01 |
| SYT4       | -0.551 | 5.209E-01 | 6.449E-03 |
| LRRC72     | -0.551 | NA        | 1.368E-02 |
| BTN1A1     | -0.553 | 1.069E-01 | 2.028E-02 |
| GMFG       | -0.553 | 5.848E-03 | 9.449E-02 |
| PTH        | -0.554 | 3.839E-01 | 5.318E-02 |
| C6orf163   | -0.554 | 5.061E-04 | 2.537E-01 |
| SPINK14    | -0.555 | 3.080E-01 | 1.112E-02 |
| LFNG       | -0.555 | 4.687E-03 | 1.943E-02 |
| DNAH9      | -0.555 | 7.104E-02 | 1.843E-01 |
| MS4A3      | -0.555 | 2.985E-01 | 5.891E-02 |
| TP53TG3D   | -0.555 | 3.086E-01 | 8.892E-03 |
| CHDH       | -0.555 | 1.904E-02 | 4.838E-03 |
| CXCL14     | -0.556 | 8.842E-02 | 3.593E-02 |
| MIR342     | -0.556 | 1.912E-01 | 2.736E-02 |
| SYNPR      | -0.556 | 4.288E-01 | 2.963E-02 |
| SLC25A27   | -0.556 | 1.372E-02 | 6.339E-02 |
| USP41      | -0.557 | 1.551E-01 | 2.099E-02 |
| GSDMC      | -0.557 | 1.020E-01 | 1.187E-03 |
| GRIK1      | -0.557 | 6.574E-04 | 2.193E-02 |
| PTPRN2     | -0.558 | 1.870E-02 | 2.652E-02 |
| ADGRB1     | -0.559 | 3.638E-02 | 9.614E-03 |
| INTS6L     | -0.559 | 2.053E-04 | 8.637E-03 |
| MEI1       | -0.560 | 3.221E-02 | 1.987E-02 |
| ANKRD34B   | -0.560 | 2.044E-01 | 4.147E-02 |
| TENM1      | -0.560 | 2.086E-01 | 4.811E-01 |
| PAX5       | -0.560 | 1.101E-01 | 1.710E-01 |
| CHKB-CPT1E | -0.560 | 1.843E-03 | 1.019E-03 |
| GAST       | -0.561 | 2.988E-01 | 3.770E-05 |
| GPR151     | -0.561 | 2.225E-01 | 9.239E-02 |
| C10orf90   | -0.561 | 1.912E-01 | 1.062E-02 |
| DEFA4      | -0.561 | 4.721E-01 | 9.125E-02 |
| PAX3       | -0.561 | 4.225E-01 | 1.496E-02 |
| CACNG3     | -0.561 | 3.983E-01 | 2.562E-02 |
| MMP26      | -0.562 | NA        | 1.408E-01 |
| MIR4686    | -0.562 | NA        | 2.860E-03 |
| SLC4A4     | -0.562 | 1.211E-01 | 2.697E-02 |
| SOHLH2     | -0.563 | 1.346E-01 | 3.668E-01 |
| TGM3       | -0.564 | 1.507E-01 | 2.558E-02 |
| FAM205A    | -0.564 | 3.093E-01 | 1.024E-01 |
| ACOD1      | -0.564 | 2.687E-01 | 1.002E-01 |
| SYCE1      | -0.564 | 1.060E-01 | 1.342E-02 |
| LAG3       | -0.564 | 5.274E-02 | 7.300E-03 |
| FCRL4      | -0.565 | 2.045E-01 | 1.220E-01 |
| SERPINA5   | -0.565 | 8.983E-02 | 8.551E-02 |
| S100A2     | -0.565 | 1.205E-01 | 6.178E-03 |
| MOBP       | -0.566 | 7.532E-02 | 4.296E-03 |
| FCRL6      | -0.566 | 4.224E-02 | 1.417E-02 |
| LRIT3      | -0.566 | 1.697E-02 | 2.845E-03 |
| UROCI      | -0.566 | 1.975E-01 | 4.441E-02 |

|           |        |           |           |
|-----------|--------|-----------|-----------|
| ANKRD20A1 | -0.566 | 2.205E-01 | 3.896E-03 |
| GZMK      | -0.567 | 9.556E-02 | 1.078E-02 |
| ALDH8A1   | -0.568 | 1.552E-02 | 7.604E-03 |
| CPA2      | -0.568 | 1.380E-01 | 7.814E-02 |
| LTB4R2    | -0.568 | 1.036E-03 | 2.527E-01 |
| P2RY10    | -0.568 | 4.798E-02 | 1.133E-02 |
| ZSCAN4    | -0.569 | 1.340E-01 | 1.289E-04 |
| CP        | -0.570 | 1.975E-01 | 7.418E-02 |
| MIR5695   | -0.570 | 2.141E-01 | 3.571E-03 |
| SLC30A8   | -0.570 | 2.543E-01 | 2.844E-02 |
| IL1RL1    | -0.570 | 5.740E-02 | 2.692E-01 |
| NPIPB13   | -0.570 | 3.756E-02 | 3.367E-02 |
| TCHHL1    | -0.570 | 4.919E-01 | 5.842E-02 |
| TRABD2A   | -0.571 | 4.922E-02 | 3.876E-03 |
| NAIP      | -0.571 | 2.106E-03 | 9.430E-06 |
| EFNB1     | -0.571 | 4.113E-04 | 3.241E-02 |
| MTRNR2L12 | -0.571 | 1.127E-02 | 2.226E-02 |
| HOXB8     | -0.571 | 9.171E-02 | 1.436E-02 |
| CRYGD     | -0.572 | 5.583E-01 | 2.999E-03 |
| MEFV      | -0.572 | 5.095E-02 | 2.065E-02 |
| CD38      | -0.572 | 5.732E-02 | 2.543E-02 |
| RFPL4B    | -0.572 | 3.180E-01 | 1.331E-01 |
| KRT17     | -0.572 | 4.917E-02 | 1.201E-01 |
| PROX2     | -0.573 | 4.719E-03 | 1.379E-01 |
| PLEK      | -0.573 | 2.992E-02 | 6.821E-03 |
| PNMA6E    | -0.573 | 6.287E-01 | 2.772E-02 |
| INHBE     | -0.574 | 7.145E-03 | 3.315E-02 |
| APOA5     | -0.574 | 3.326E-01 | 1.096E-02 |
| CPNE7     | -0.574 | 4.863E-02 | 1.061E-01 |
| TMPRSS4   | -0.574 | 7.953E-02 | 8.277E-03 |
| KLRD1     | -0.574 | 2.727E-02 | 1.965E-01 |
| ADGRG7    | -0.575 | 2.760E-01 | 2.415E-02 |
| C12orf50  | -0.575 | 6.012E-02 | 6.782E-04 |
| TRIM43B   | -0.576 | 7.730E-01 | 4.217E-03 |
| AFM       | -0.576 | 4.777E-01 | 1.416E-01 |
| FAM212A   | -0.576 | 2.155E-03 | 6.982E-02 |
| DYDC1     | -0.576 | 5.004E-01 | 2.611E-02 |
| CES3      | -0.577 | 6.938E-02 | 1.725E-01 |
| OGDHL     | -0.577 | 9.202E-02 | 1.864E-04 |
| LCK       | -0.577 | 6.843E-03 | 2.535E-01 |
| MIRLET7F1 | -0.578 | NA        | 9.791E-04 |
| TMC7      | -0.578 | 4.668E-03 | 2.285E-01 |
| PRMT8     | -0.579 | 1.464E-01 | 3.415E-04 |
| PTPRS     | -0.579 | 8.385E-04 | 2.889E-02 |
| SLC25A21  | -0.579 | 1.306E-02 | 2.668E-01 |
| MUC7      | -0.579 | NA        | 1.522E-02 |
| IGSF1     | -0.579 | 9.130E-02 | 1.680E-04 |
| IL21R     | -0.579 | 4.329E-02 | 2.174E-03 |
| ESPNL     | -0.581 | 3.952E-02 | 2.591E-03 |
| FOXD4L4   | -0.581 | 1.270E-01 | 5.963E-03 |

|           |        |           |           |
|-----------|--------|-----------|-----------|
| LRTM2     | -0.581 | 2.305E-01 | 6.874E-02 |
| VSNL1     | -0.582 | 1.384E-01 | 7.044E-03 |
| GJD2      | -0.582 | 4.522E-01 | 2.198E-02 |
| FTCD      | -0.582 | 8.514E-02 | 4.117E-01 |
| CEACAM3   | -0.583 | 5.051E-02 | 5.889E-02 |
| KRTAP5-8  | -0.583 | 1.525E-01 | 1.231E-04 |
| RBMV1A1   | -0.583 | NA        | 1.496E-02 |
| TG        | -0.583 | 4.344E-02 | 1.717E-01 |
| MIR10B    | -0.584 | 1.380E-01 | 3.864E-01 |
| GLP1R     | -0.584 | 1.536E-01 | 4.226E-04 |
| TNNI2     | -0.585 | 1.001E-01 | 3.559E-03 |
| TRIM58    | -0.585 | 1.046E-01 | 8.841E-02 |
| ZNF679    | -0.585 | 6.109E-01 | 2.747E-01 |
| MIR642A   | -0.585 | 2.407E-01 | 1.220E-01 |
| LHX8      | -0.586 | 2.508E-01 | 1.661E-02 |
| TMEM171   | -0.586 | 3.079E-02 | 5.737E-02 |
| CCL15     | -0.587 | 2.617E-01 | 2.487E-01 |
| HS3ST1    | -0.587 | 2.448E-03 | 1.633E-02 |
| PKHD1L1   | -0.587 | 5.759E-02 | 6.287E-01 |
| TFPI2     | -0.587 | 1.044E-01 | 1.406E-01 |
| PRSS37    | -0.588 | 1.980E-01 | 5.230E-02 |
| PDE4C     | -0.588 | 2.724E-02 | 5.377E-01 |
| TREML4    | -0.588 | 1.764E-01 | 3.470E-02 |
| LCE2A     | -0.588 | 7.046E-01 | 3.338E-03 |
| RBMV1E    | -0.589 | NA        | 1.203E-02 |
| CYP4F11   | -0.589 | 7.499E-02 | 8.578E-03 |
| JAKMIP1   | -0.589 | 3.884E-02 | 5.295E-03 |
| RBP4      | -0.590 | 1.040E-01 | 2.701E-04 |
| C2orf88   | -0.590 | 4.273E-03 | 9.299E-03 |
| MAGEA4    | -0.590 | 4.435E-01 | 3.800E-07 |
| SAMD3     | -0.590 | 1.375E-02 | 3.639E-02 |
| LRRTM1    | -0.591 | 2.921E-01 | 3.863E-02 |
| AQP3      | -0.591 | 5.999E-02 | 4.196E-02 |
| SERPINA12 | -0.591 | 5.096E-01 | 3.698E-03 |
| CA9       | -0.592 | 1.060E-01 | 2.371E-03 |
| SLA2      | -0.593 | 1.596E-02 | 6.418E-02 |
| ACOXL     | -0.593 | 8.052E-02 | 4.481E-01 |
| SLC22A6   | -0.595 | 5.526E-01 | 1.826E-02 |
| SLC26A7   | -0.596 | 3.130E-02 | 6.180E-04 |
| NR0B2     | -0.596 | 7.483E-02 | 6.704E-03 |
| RUNDC3A   | -0.597 | 2.361E-02 | 2.041E-04 |
| ALDOB     | -0.597 | 1.261E-01 | 9.929E-04 |
| SLC22A10  | -0.598 | 2.558E-01 | 3.912E-01 |
| BAAT      | -0.598 | 1.272E-01 | 2.039E-03 |
| SERPINA4  | -0.598 | 4.137E-01 | 7.695E-02 |
| UNC5CL    | -0.599 | 3.613E-03 | 2.710E-02 |
| IQCA1     | -0.599 | 4.994E-02 | 1.820E-05 |
| ABCC8     | -0.599 | 1.873E-01 | 1.827E-01 |
| SLC39A5   | -0.600 | 1.184E-02 | 5.383E-02 |
| ATP7B     | -0.600 | 2.078E-03 | 6.156E-02 |

|            |        |           |           |
|------------|--------|-----------|-----------|
| OR2AG2     | -0.600 | 1.530E-01 | 2.952E-02 |
| HMSD       | -0.601 | 7.872E-02 | 3.158E-04 |
| CLDN24     | -0.601 | 3.189E-01 | 2.038E-02 |
| PLXNB3     | -0.601 | 5.603E-03 | 7.575E-02 |
| VPREB3     | -0.601 | 4.756E-02 | 6.646E-02 |
| TRIM55     | -0.603 | 7.945E-02 | 9.639E-02 |
| MIR6730    | -0.603 | 4.469E-02 | 5.168E-03 |
| GFI1       | -0.605 | 8.036E-03 | 1.423E-01 |
| PDE6B      | -0.607 | 1.129E-02 | 5.532E-02 |
| ASIC2      | -0.607 | 7.104E-02 | 1.713E-02 |
| SPRR1B     | -0.607 | 2.114E-01 | 3.520E-03 |
| FOXD4L3    | -0.608 | 1.225E-01 | 4.975E-03 |
| SLC26A3    | -0.608 | 4.852E-02 | 2.027E-01 |
| CYP2C9     | -0.608 | 2.191E-01 | 2.942E-02 |
| DCAF12L1   | -0.608 | 4.362E-01 | 5.512E-03 |
| CHRM1      | -0.609 | 2.101E-01 | 1.689E-02 |
| PLCH2      | -0.609 | 2.354E-02 | 4.081E-02 |
| DMRTA2     | -0.609 | 1.283E-01 | 1.095E-02 |
| TM4SF19    | -0.609 | 1.041E-01 | 2.867E-03 |
| TEX47      | -0.609 | 4.632E-01 | 1.477E-04 |
| TBX21      | -0.610 | 2.305E-02 | 2.124E-01 |
| BPIFB4     | -0.610 | 2.288E-01 | 1.165E-01 |
| TEX43      | -0.610 | 2.565E-01 | 5.022E-02 |
| CRCT1      | -0.610 | 2.167E-01 | 7.340E-02 |
| OR14I1     | -0.611 | NA        | 1.596E-01 |
| FABP2      | -0.611 | 1.452E-01 | 3.470E-05 |
| MUC3A      | -0.612 | 9.005E-02 | 2.714E-02 |
| HTR4       | -0.612 | 9.456E-02 | 3.681E-03 |
| SMIM1      | -0.613 | 6.005E-03 | 1.599E-01 |
| HBM        | -0.613 | 3.904E-01 | 3.527E-01 |
| GSX2       | -0.613 | 4.308E-01 | 5.211E-03 |
| RASD1      | -0.614 | 8.919E-03 | 1.831E-02 |
| SPZ1       | -0.614 | 4.635E-01 | 2.774E-03 |
| RPL10L     | -0.614 | 2.293E-01 | 3.620E-05 |
| AC011604.2 | -0.614 | 5.032E-01 | 1.194E-02 |
| ZPLD1      | -0.615 | 1.132E-01 | 2.442E-02 |
| PRR26      | -0.615 | 1.298E-02 | 5.630E-06 |
| IZUMO1R    | -0.616 | 2.715E-01 | 1.938E-03 |
| GDNF       | -0.616 | 3.039E-02 | 2.585E-03 |
| BSND       | -0.616 | 2.332E-01 | 2.272E-03 |
| PPP3R2     | -0.617 | 3.805E-01 | 2.200E-05 |
| CXorf67    | -0.617 | 3.623E-01 | 1.387E-01 |
| SEC14L3    | -0.617 | 1.748E-01 | 2.611E-02 |
| OR2H1      | -0.618 | 3.339E-01 | 5.226E-03 |
| ASB15      | -0.618 | 1.822E-01 | 4.078E-02 |
| OR2T8      | -0.618 | 5.737E-01 | 4.554E-03 |
| RGS13      | -0.619 | 3.413E-02 | 3.335E-03 |
| RIMBP2     | -0.621 | 6.453E-02 | 1.611E-04 |
| MIR8089    | -0.621 | 5.175E-01 | 6.193E-02 |
| PIGZ       | -0.622 | 1.792E-03 | 2.089E-02 |

|            |        |           |           |
|------------|--------|-----------|-----------|
| CD3D       | -0.623 | 1.533E-02 | 4.390E-05 |
| LHFPL3     | -0.623 | 3.005E-01 | 2.676E-03 |
| FAM19A1    | -0.623 | 6.634E-02 | 4.038E-01 |
| SULT4A1    | -0.623 | 2.551E-01 | 1.511E-02 |
| TOX3       | -0.624 | 2.158E-01 | 2.854E-02 |
| TRAT1      | -0.624 | 5.040E-02 | 5.450E-02 |
| PRKCG      | -0.624 | 1.560E-01 | 3.538E-03 |
| HBA2       | -0.624 | 1.793E-02 | 8.186E-02 |
| DAZL       | -0.625 | 1.422E-01 | 1.380E-02 |
| OR2B2      | -0.625 | 3.647E-01 | 3.658E-03 |
| TREML2     | -0.626 | 2.992E-02 | 9.048E-03 |
| CR2        | -0.626 | 2.121E-01 | 1.627E-01 |
| PRKCB      | -0.626 | 1.066E-02 | 8.594E-03 |
| IYD        | -0.627 | 1.119E-01 | 3.774E-01 |
| AC005324.4 | -0.627 | 1.089E-01 | 1.378E-02 |
| HOXB5      | -0.627 | 1.849E-02 | 2.591E-02 |
| CDH12      | -0.628 | 3.418E-01 | 1.361E-03 |
| FGF8       | -0.628 | 4.962E-02 | 3.113E-03 |
| RHOH       | -0.628 | 1.634E-02 | 2.739E-03 |
| FOXA2      | -0.629 | 3.317E-01 | 1.585E-04 |
| CNMD       | -0.630 | 2.109E-01 | 4.857E-02 |
| BRINP3     | -0.630 | 2.569E-01 | 9.425E-04 |
| SLC28A2    | -0.630 | 5.983E-02 | 2.073E-03 |
| KIR3DL3    | -0.631 | 4.956E-01 | 3.145E-01 |
| CACNA1E    | -0.631 | 5.630E-02 | 6.227E-01 |
| KCNU1      | -0.632 | 4.130E-01 | 2.285E-01 |
| OPALIN     | -0.633 | 3.644E-01 | 1.942E-01 |
| CCDC175    | -0.634 | 4.312E-01 | 3.378E-03 |
| NEUROG3    | -0.634 | 2.296E-01 | 4.312E-03 |
| CCDC85A    | -0.635 | 3.478E-02 | 2.477E-01 |
| FAM83F     | -0.636 | 5.235E-04 | 4.900E-03 |
| ANKRD30BL  | -0.636 | 3.757E-01 | 1.623E-02 |
| KCNJ4      | -0.636 | 1.980E-01 | 2.145E-04 |
| AC010255.3 | -0.636 | 1.342E-01 | 1.997E-02 |
| JPH4       | -0.637 | 8.128E-03 | 1.594E-01 |
| GABRA1     | -0.638 | 3.502E-01 | 8.251E-02 |
| AXDND1     | -0.638 | 8.949E-02 | 3.206E-01 |
| NRN1       | -0.639 | 1.751E-02 | 7.786E-03 |
| FGF19      | -0.639 | 3.469E-01 | 9.951E-02 |
| FOLH1      | -0.642 | 3.887E-04 | 1.737E-02 |
| 43901.000  | -0.642 | 3.960E-01 | 3.690E-04 |
| ACTBL2     | -0.643 | 1.984E-01 | 1.880E-01 |
| KRTAP4-6   | -0.643 | NA        | 1.674E-02 |
| KCNQ5      | -0.644 | 1.215E-01 | 1.924E-03 |
| CHST2      | -0.644 | 5.848E-03 | 2.888E-02 |
| SPERT      | -0.644 | 9.859E-03 | 3.262E-02 |
| AC007998.2 | -0.644 | 7.868E-03 | 2.864E-02 |
| CYP11B1    | -0.644 | 4.765E-01 | 1.359E-01 |
| AKR1C1     | -0.644 | 6.043E-02 | 7.794E-02 |
| LGALS9C    | -0.644 | 6.786E-02 | 3.637E-03 |



|            |        |           |           |
|------------|--------|-----------|-----------|
| OTOG       | -0.644 | 2.509E-01 | 7.286E-04 |
| CYP2C19    | -0.645 | 4.234E-01 | 2.200E-04 |
| JAKMIP2    | -0.646 | 1.694E-02 | 2.456E-03 |
| CCR9       | -0.646 | 3.518E-02 | 1.117E-02 |
| LYZL1      | -0.646 | NA        | 2.583E-02 |
| SERPINB13  | -0.646 | 2.368E-01 | 7.466E-03 |
| FGG        | -0.646 | 3.918E-01 | 6.659E-02 |
| IRF8       | -0.647 | 1.930E-02 | 4.104E-03 |
| FER1L6     | -0.647 | 1.530E-01 | 1.082E-02 |
| CD7        | -0.648 | 9.640E-03 | 4.112E-04 |
| GAL3ST2    | -0.648 | 7.661E-02 | 1.460E-01 |
| GZMB       | -0.648 | 4.109E-02 | 2.254E-03 |
| NCF1       | -0.649 | 1.880E-02 | 1.211E-01 |
| PLCG2      | -0.649 | 1.550E-05 | 6.340E-04 |
| CYP2A7     | -0.649 | 3.139E-01 | 2.453E-01 |
| SLC17A8    | -0.650 | 2.550E-01 | 1.478E-02 |
| ERC2       | -0.650 | 2.342E-02 | 1.210E-08 |
| GZMM       | -0.650 | 1.342E-02 | 3.933E-03 |
| OSTN       | -0.651 | 2.444E-01 | 8.306E-03 |
| FCAMR      | -0.651 | 1.679E-01 | 5.013E-03 |
| AC068775.2 | -0.651 | NA        | 7.431E-04 |
| NEUROG2    | -0.651 | 2.396E-01 | 3.513E-04 |
| COL26A1    | -0.651 | 8.600E-02 | 2.284E-02 |
| HP         | -0.652 | 1.933E-01 | 7.349E-04 |
| CYP4F12    | -0.652 | 5.802E-02 | 6.252E-03 |
| CXCL10     | -0.653 | 7.239E-02 | 9.297E-03 |
| TRIM40     | -0.653 | 2.401E-01 | 1.358E-02 |
| ASIC5      | -0.655 | 2.483E-01 | 1.136E-02 |
| NPY2R      | -0.655 | 5.607E-01 | 3.898E-03 |
| ZNF560     | -0.657 | 3.465E-01 | 1.560E-01 |
| ABCA6      | -0.657 | 3.166E-02 | 7.760E-03 |
| PAQR9      | -0.657 | 1.132E-01 | 3.802E-02 |
| NDUFA4L2   | -0.658 | 2.517E-02 | 2.151E-01 |
| HYAL4      | -0.659 | 4.863E-02 | 5.893E-02 |
| TRPM1      | -0.661 | 5.073E-02 | 6.622E-02 |
| ALDH1L1    | -0.661 | 3.989E-02 | 1.774E-01 |
| SLC4A1     | -0.662 | 3.574E-02 | 4.536E-03 |
| KRT6A      | -0.662 | 2.253E-01 | 3.993E-02 |
| C11orf16   | -0.662 | 5.790E-03 | 5.703E-04 |
| C16orf92   | -0.663 | 3.252E-01 | 5.545E-02 |
| SNAI3      | -0.663 | 8.865E-04 | 2.398E-03 |
| EVX2       | -0.663 | 1.368E-01 | 9.192E-02 |
| MAB21L1    | -0.663 | 3.656E-02 | 8.374E-03 |
| TPH1       | -0.663 | 6.818E-04 | 1.253E-01 |
| ADAM23     | -0.663 | 2.319E-02 | 1.726E-02 |
| AICDA      | -0.664 | 1.389E-01 | 8.430E-05 |
| PNLIPRP1   | -0.664 | 2.607E-01 | 1.889E-03 |
| GNRH2      | -0.664 | 3.614E-03 | 1.039E-02 |
| KCTD14     | -0.665 | 6.624E-03 | 1.265E-01 |
| IL22       | -0.665 | 3.671E-01 | 4.750E-05 |

|            |        |           |           |
|------------|--------|-----------|-----------|
| GYPA       | -0.665 | 4.222E-01 | 3.004E-02 |
| SLC35G3    | -0.665 | 1.285E-01 | 1.636E-01 |
| VNN3       | -0.666 | 7.082E-02 | 4.515E-03 |
| SLC13A2    | -0.666 | 1.973E-01 | 2.074E-03 |
| ANKRD33    | -0.667 | 1.663E-01 | 7.496E-04 |
| HOXB6      | -0.668 | 9.424E-03 | 5.449E-04 |
| PAGE2B     | -0.668 | 1.991E-01 | 2.466E-03 |
| CCDC129    | -0.668 | 1.816E-01 | 2.045E-03 |
| CACNG2     | -0.668 | 2.288E-01 | 4.540E-05 |
| POTEC      | -0.668 | 4.525E-01 | 1.878E-03 |
| NNAT       | -0.668 | 3.983E-02 | 3.257E-04 |
| PRDM9      | -0.669 | 1.866E-01 | 1.776E-02 |
| LRAT       | -0.669 | 1.552E-01 | 1.137E-04 |
| ST8SIA5    | -0.669 | 5.335E-03 | 2.913E-04 |
| FGF23      | -0.670 | 2.961E-01 | 4.375E-03 |
| TMEM235    | -0.670 | 1.970E-01 | 1.074E-04 |
| MIR4520-1  | -0.670 | 8.578E-03 | 2.221E-01 |
| NELL2      | -0.670 | 3.406E-02 | 2.107E-02 |
| KIF5A      | -0.670 | 2.433E-02 | 7.821E-04 |
| CGA        | -0.670 | 1.986E-01 | 3.304E-03 |
| CXCL13     | -0.671 | 6.171E-02 | 1.270E-02 |
| SERPINB4   | -0.672 | 2.349E-01 | 1.534E-03 |
| AC004080.3 | -0.673 | 2.898E-01 | 6.231E-03 |
| FAM170A    | -0.673 | 1.202E-01 | 3.594E-01 |
| CTNNA2     | -0.674 | 1.796E-01 | 3.205E-03 |
| CLEC17A    | -0.674 | 7.375E-02 | 2.228E-03 |
| AQP5       | -0.675 | 1.219E-01 | 1.212E-03 |
| PLPPR1     | -0.675 | 1.768E-01 | 9.479E-04 |
| CST9       | -0.675 | 3.489E-01 | 1.951E-02 |
| NPIPB15    | -0.675 | 4.451E-02 | 1.768E-04 |
| IL25       | -0.676 | 1.663E-01 | 1.715E-04 |
| SPIC       | -0.676 | 2.627E-01 | 5.844E-02 |
| NEFM       | -0.677 | 1.899E-01 | 1.496E-01 |
| TKTL1      | -0.678 | 1.745E-01 | 5.399E-02 |
| OR2L2      | -0.678 | 6.387E-01 | 3.773E-04 |
| LAIR2      | -0.678 | 1.930E-02 | 5.753E-03 |
| GKN2       | -0.680 | 3.548E-01 | 1.322E-01 |
| AADAACL3   | -0.681 | 5.920E-01 | 1.950E-05 |
| PHOX2A     | -0.681 | 3.202E-01 | 1.843E-01 |
| PCDHGC5    | -0.681 | 1.479E-02 | 2.224E-03 |
| PHACTR3    | -0.681 | 2.758E-02 | 1.972E-02 |
| LCE3A      | -0.681 | 4.279E-01 | 6.733E-01 |
| ZNF648     | -0.683 | 1.388E-01 | 2.312E-01 |
| PNCK       | -0.684 | 6.905E-02 | 4.971E-02 |
| RTN1       | -0.684 | 5.345E-03 | 3.751E-04 |
| HNF4G      | -0.685 | 3.230E-02 | 4.973E-02 |
| GLYATL1    | -0.685 | 8.844E-02 | 2.021E-04 |
| GLRA4      | -0.685 | 1.011E-01 | 2.123E-02 |
| NPAP1      | -0.686 | 2.735E-01 | 5.423E-03 |
| ADGRG5     | -0.687 | 9.981E-03 | 1.952E-04 |

|           |        |           |           |
|-----------|--------|-----------|-----------|
| OR9K2     | -0.688 | 3.398E-01 | 1.820E-05 |
| MIR141    | -0.688 | 1.883E-01 | 4.154E-02 |
| SPATA31A6 | -0.689 | NA        | 4.204E-01 |
| SLC10A6   | -0.690 | 2.551E-02 | 5.100E-01 |
| TAAR1     | -0.690 | 4.168E-01 | 5.175E-03 |
| CTRB1     | -0.690 | 2.643E-01 | 3.634E-02 |
| SCML4     | -0.690 | 1.351E-02 | 3.899E-01 |
| HOXB3     | -0.691 | 1.957E-03 | 1.023E-03 |
| FBLL1     | -0.691 | 4.560E-02 | 1.422E-02 |
| ALX1      | -0.691 | 2.085E-01 | 6.038E-02 |
| PRSS41    | -0.692 | 2.292E-01 | 2.742E-02 |
| PLEKHH1   | -0.692 | 4.550E-04 | 6.606E-03 |
| DBH       | -0.692 | 5.034E-03 | 4.851E-02 |
| TSSK1B    | -0.692 | 2.140E-01 | 9.479E-04 |
| IL22RA2   | -0.693 | 6.036E-02 | 1.022E-02 |
| CPA1      | -0.693 | 1.117E-01 | 1.832E-01 |
| GZMA      | -0.693 | 1.916E-02 | 2.724E-03 |
| CD3G      | -0.693 | 2.798E-03 | 2.497E-01 |
| HCN4      | -0.694 | 1.075E-01 | 7.941E-03 |
| HSFY2     | -0.694 | NA        | 9.761E-04 |
| SH2D5     | -0.694 | 5.059E-02 | 7.154E-02 |
| HBA1      | -0.694 | 2.632E-02 | 1.011E-04 |
| MRLN      | -0.694 | 1.699E-01 | 2.258E-02 |
| FAM228A   | -0.695 | 9.403E-03 | 6.504E-04 |
| FFAR1     | -0.695 | 1.714E-01 | 2.107E-02 |
| MIR6775   | -0.696 | 1.019E-01 | 1.269E-02 |
| MMP20     | -0.697 | 3.384E-01 | 1.325E-03 |
| HPCAL4    | -0.697 | 3.578E-02 | 5.792E-04 |
| TDRD9     | -0.697 | 5.297E-02 | 9.236E-03 |
| SMIM10L2A | -0.697 | 3.614E-03 | 3.584E-01 |
| NLRP13    | -0.698 | 3.347E-01 | 5.617E-02 |
| FAM237A   | -0.698 | NA        | 5.949E-02 |
| LRIT2     | -0.698 | 3.642E-01 | 4.010E-04 |
| SPATA8    | -0.699 | 2.636E-01 | 1.438E-04 |
| PLCD3     | -0.699 | 3.442E-04 | 3.272E-01 |
| SLC7A11   | -0.699 | 1.954E-02 | 6.483E-04 |
| NRG2      | -0.699 | 2.321E-02 | 7.254E-03 |
| CLCA2     | -0.699 | 1.019E-01 | 1.541E-02 |
| ZNF432    | -0.701 | 4.778E-04 | 9.127E-02 |
| SERPINA3  | -0.701 | 1.138E-01 | 1.113E-03 |
| PDCD1     | -0.704 | 1.493E-02 | 7.423E-02 |
| DUSP2     | -0.704 | 5.421E-03 | 3.530E-04 |
| IL33      | -0.705 | 2.551E-02 | 1.287E-01 |
| IL13RA2   | -0.706 | 2.405E-02 | 2.253E-01 |
| SPRR2D    | -0.707 | 1.647E-01 | 4.863E-02 |
| PAPLN     | -0.707 | 8.500E-05 | 1.635E-02 |
| MYOM3     | -0.707 | 5.855E-03 | 2.451E-01 |
| COLGALT2  | -0.708 | 5.569E-03 | 3.043E-02 |
| SIRPG     | -0.709 | 5.519E-03 | 4.335E-02 |
| ARHGAP6   | -0.709 | 6.005E-03 | 7.734E-03 |

|            |        |           |           |
|------------|--------|-----------|-----------|
| ASTL       | -0.709 | 2.050E-02 | 3.218E-02 |
| C10orf142  | -0.709 | 1.680E-01 | 3.915E-02 |
| GOLGA6L2   | -0.710 | 2.703E-01 | 9.070E-05 |
| TBX1       | -0.710 | 2.129E-02 | 1.267E-03 |
| ACADL      | -0.711 | 4.285E-02 | 1.341E-02 |
| TRNP1      | -0.711 | 3.894E-03 | 8.142E-02 |
| ADAM28     | -0.712 | 3.613E-03 | 1.756E-02 |
| KLK11      | -0.712 | 1.576E-01 | 4.570E-03 |
| CCKBR      | -0.712 | 2.467E-01 | 1.743E-02 |
| SLC13A1    | -0.713 | NA        | 2.609E-01 |
| MIR200B    | -0.713 | 4.642E-02 | 7.002E-02 |
| RHOXF2     | -0.713 | 5.732E-01 | 1.339E-02 |
| SPATA31E1  | -0.715 | 2.288E-01 | 7.590E-05 |
| LCE1E      | -0.716 | 1.831E-01 | 3.679E-04 |
| GDPD2      | -0.716 | 5.612E-02 | 8.570E-02 |
| GIPR       | -0.717 | 9.378E-04 | 9.600E-06 |
| KCNC2      | -0.718 | 5.342E-01 | 3.443E-03 |
| AQP12B     | -0.720 | 2.930E-01 | 5.607E-02 |
| TEX13B     | -0.720 | 2.095E-01 | 4.467E-03 |
| CXCL9      | -0.720 | 4.745E-02 | 6.246E-03 |
| TEX37      | -0.720 | 3.147E-01 | 1.172E-03 |
| BMPR1B     | -0.721 | 4.155E-02 | 1.053E-02 |
| HORMAD2    | -0.723 | 1.973E-01 | 5.810E-06 |
| TSPAN7     | -0.723 | 1.306E-02 | 1.518E-01 |
| AL589666.1 | -0.724 | 9.109E-02 | 5.029E-03 |
| TNFSF18    | -0.724 | 1.822E-02 | 1.788E-03 |
| TRIM31     | -0.725 | 6.727E-02 | 6.890E-05 |
| LGALS9B    | -0.725 | 1.107E-01 | 1.916E-02 |
| PROC       | -0.726 | 2.461E-03 | 4.119E-03 |
| LCE5A      | -0.726 | 2.263E-01 | 1.984E-02 |
| CCDC141    | -0.727 | 2.943E-03 | 1.001E-01 |
| MIA2       | -0.728 | 1.929E-01 | 6.434E-02 |
| KLRC1      | -0.729 | 8.605E-03 | 4.801E-03 |
| BNC1       | -0.730 | 2.334E-01 | 1.757E-02 |
| TCL1A      | -0.730 | 9.425E-02 | 3.003E-03 |
| SERPINA9   | -0.731 | 2.195E-01 | 1.580E-02 |
| ESM1       | -0.732 | 9.887E-04 | 2.431E-01 |
| OR5B12     | -0.732 | NA        | 2.573E-02 |
| UPK3BL1    | -0.732 | 1.289E-01 | 3.042E-01 |
| CDC42EP5   | -0.733 | 8.882E-04 | 3.289E-04 |
| IL2        | -0.734 | 1.398E-01 | 1.495E-02 |
| KCNB2      | -0.736 | 1.744E-01 | 1.550E-05 |
| FRMPD4     | -0.737 | 1.233E-01 | 5.595E-02 |
| MRGPRX3    | -0.737 | 2.301E-01 | 6.640E-06 |
| TUBA3E     | -0.738 | 3.021E-01 | 4.073E-02 |
| CRYGC      | -0.739 | 4.907E-01 | 2.920E-03 |
| DCT        | -0.739 | 9.005E-02 | 4.482E-04 |
| ABCC2      | -0.739 | 1.358E-03 | 4.542E-03 |
| FGF        | -0.740 | 3.375E-01 | 2.501E-04 |
| GAGE12J    | -0.741 | 6.958E-01 | 4.475E-03 |

|            |        |           |           |
|------------|--------|-----------|-----------|
| KRT2       | -0.741 | 3.041E-02 | 7.681E-03 |
| AL132639.3 | -0.741 | 4.388E-01 | 1.211E-03 |
| MYO16      | -0.741 | 1.698E-02 | 4.595E-04 |
| SLC10A4    | -0.741 | 2.042E-02 | 1.525E-01 |
| SLC5A1     | -0.742 | 1.428E-01 | 7.513E-03 |
| MIR483     | -0.742 | 4.147E-01 | 1.047E-01 |
| PVALB      | -0.744 | 1.100E-01 | 3.014E-02 |
| KLHL32     | -0.744 | 3.181E-03 | 9.958E-02 |
| PIGR       | -0.744 | 9.168E-02 | 2.374E-03 |
| TBC1D3D    | -0.744 | 3.714E-01 | 6.282E-03 |
| AC018554.3 | -0.744 | 6.219E-01 | 6.400E-03 |
| LY6G6E     | -0.746 | 3.558E-01 | 1.070E-03 |
| CNTN6      | -0.746 | 5.526E-02 | 5.984E-03 |
| FASLG      | -0.747 | 1.252E-02 | 1.069E-01 |
| MST1R      | -0.747 | 1.249E-03 | 3.338E-02 |
| EPS8L3     | -0.747 | 1.040E-01 | 6.055E-02 |
| PRSS12     | -0.748 | 1.489E-02 | 2.111E-02 |
| DAZ2       | -0.748 | NA        | 3.515E-02 |
| MAG        | -0.748 | 6.409E-02 | 1.293E-01 |
| OR2A14     | -0.750 | 1.023E-01 | 2.630E-07 |
| LY6L       | -0.750 | 4.993E-01 | 9.940E-06 |
| ALAS2      | -0.750 | 9.218E-03 | 3.436E-02 |
| MIR429     | -0.750 | 9.218E-03 | 6.983E-03 |
| SPRR2G     | -0.750 | 3.276E-01 | 5.813E-02 |
| MOGAT3     | -0.751 | 7.368E-02 | 7.472E-03 |
| SMAD6      | -0.751 | 1.382E-04 | 1.897E-01 |
| CCDC188    | -0.753 | 1.156E-03 | 1.589E-03 |
| SPRR2E     | -0.753 | 2.772E-01 | 3.063E-02 |
| OR9Q1      | -0.754 | 3.334E-01 | 1.095E-03 |
| HAPLN1     | -0.755 | 1.387E-02 | 7.627E-02 |
| LYZ        | -0.757 | 8.108E-03 | 7.360E-05 |
| PYHIN1     | -0.759 | 3.472E-03 | 1.383E-01 |
| HBD        | -0.760 | 7.336E-02 | 5.018E-04 |
| NTRK2      | -0.760 | 1.945E-02 | 1.730E-02 |
| CDH7       | -0.760 | 1.823E-01 | 2.745E-02 |
| PSMA8      | -0.760 | 1.458E-01 | 3.284E-03 |
| FABP6      | -0.761 | 1.592E-02 | 1.017E-02 |
| MCHR2      | -0.761 | 2.059E-01 | 1.117E-02 |
| OTOP3      | -0.762 | 2.508E-01 | 3.905E-02 |
| PIK3C2G    | -0.763 | 1.532E-01 | 2.997E-02 |
| ZIC4       | -0.764 | 2.730E-01 | 1.021E-03 |
| ARHGEF38   | -0.764 | 3.076E-03 | 6.720E-06 |
| IRS4       | -0.765 | 1.336E-01 | 2.864E-02 |
| SLC38A5    | -0.766 | 4.921E-03 | 2.988E-01 |
| KRTAP7-1   | -0.766 | 6.003E-01 | 1.691E-04 |
| PDE10A     | -0.766 | 3.615E-03 | 1.800E-02 |
| CER1       | -0.766 | 2.203E-01 | 4.079E-01 |
| PRKAG3     | -0.766 | 5.066E-02 | 9.728E-03 |
| MIOX       | -0.767 | 1.260E-02 | 2.531E-02 |
| CDH8       | -0.768 | 6.859E-03 | 2.731E-03 |

|            |        |           |           |
|------------|--------|-----------|-----------|
| DUOX2      | -0.769 | 2.014E-02 | 4.002E-02 |
| OR2C3      | -0.769 | 2.935E-01 | 4.252E-02 |
| KRT82      | -0.770 | 1.185E-01 | 3.091E-02 |
| NKG7       | -0.771 | 5.335E-03 | 3.418E-03 |
| SSTR1      | -0.771 | 1.926E-02 | 1.016E-02 |
| ST3GAL5    | -0.771 | 4.993E-04 | 8.276E-04 |
| TSPY3      | -0.772 | NA        | 4.806E-04 |
| DSG3       | -0.773 | 1.725E-01 | 5.545E-03 |
| ANKS4B     | -0.776 | 5.426E-02 | 6.949E-03 |
| ALDH1A1    | -0.777 | 1.503E-02 | 3.942E-02 |
| LEAP2      | -0.777 | 2.156E-03 | 4.450E-02 |
| ADGRA1     | -0.779 | 2.246E-01 | 3.769E-03 |
| GABRA4     | -0.780 | 2.726E-01 | 1.082E-03 |
| PRDM7      | -0.780 | 4.217E-02 | 7.644E-04 |
| MDGA2      | -0.781 | 2.226E-01 | 1.783E-04 |
| MIR200C    | -0.781 | 1.417E-01 | 6.016E-02 |
| CHRND      | -0.781 | 1.680E-01 | 1.920E-05 |
| TBATA      | -0.782 | 8.165E-02 | 2.821E-02 |
| AVPR1B     | -0.782 | 6.577E-02 | 3.229E-02 |
| TCN1       | -0.782 | 9.706E-02 | 5.459E-02 |
| FSIP2      | -0.783 | 4.292E-03 | 6.753E-03 |
| UBD        | -0.783 | 3.611E-02 | 1.840E-03 |
| ACY3       | -0.783 | 2.191E-03 | 1.320E-05 |
| PLA2G12B   | -0.784 | 1.757E-01 | 5.524E-02 |
| NLRP11     | -0.785 | 5.305E-02 | 1.528E-03 |
| TSPEAR     | -0.786 | 6.885E-02 | 2.411E-01 |
| NELL1      | -0.786 | 8.521E-02 | 2.380E-02 |
| KCNK9      | -0.786 | 2.208E-02 | 2.187E-03 |
| CD8A       | -0.787 | 2.722E-03 | 3.901E-03 |
| AL583836.1 | -0.788 | 3.504E-01 | 2.880E-05 |
| MAGEB6     | -0.789 | 3.152E-01 | 7.260E-04 |
| COL9A1     | -0.789 | 4.700E-02 | 5.112E-03 |
| MIR6071    | -0.791 | 2.313E-01 | 5.625E-04 |
| BAALC      | -0.791 | 1.298E-02 | 3.344E-03 |
| CA12       | -0.791 | 1.369E-03 | 4.544E-04 |
| KLK13      | -0.793 | 1.132E-01 | 1.132E-03 |
| KCNH4      | -0.793 | 3.254E-03 | 1.440E-02 |
| C1orf186   | -0.793 | 2.791E-02 | 9.262E-03 |
| CD8B       | -0.794 | 3.340E-03 | 1.277E-02 |
| ZIC1       | -0.796 | 2.781E-01 | 6.014E-03 |
| PLPPR3     | -0.796 | 2.319E-02 | 5.810E-03 |
| KLRK1      | -0.796 | 9.300E-05 | 5.438E-02 |
| PF4        | -0.796 | 3.638E-02 | 1.368E-04 |
| RIT2       | -0.797 | 3.438E-01 | 3.020E-06 |
| KIR2DL3    | -0.798 | 5.352E-02 | 1.290E-01 |
| DPP10      | -0.799 | 2.027E-01 | 6.988E-02 |
| APCDD1     | -0.799 | 3.770E-05 | 1.835E-03 |
| FABP5      | -0.799 | 1.033E-03 | 1.803E-01 |
| IL21       | -0.801 | 2.044E-01 | 1.217E-04 |
| THEMIS     | -0.803 | 3.891E-03 | 4.530E-04 |

|             |        |           |           |
|-------------|--------|-----------|-----------|
| PPM1N       | -0.805 | 2.678E-03 | 1.135E-01 |
| MOGAT2      | -0.806 | 8.461E-02 | 1.136E-04 |
| EOMES       | -0.806 | 2.802E-03 | 4.018E-03 |
| MIR200A     | -0.809 | 1.655E-02 | 2.253E-02 |
| BTNL8       | -0.813 | 4.794E-03 | 2.812E-02 |
| SGCZ        | -0.813 | 1.708E-01 | 6.210E-06 |
| TYR         | -0.814 | 2.781E-01 | 5.926E-02 |
| NPY         | -0.816 | 3.182E-01 | 4.751E-03 |
| DGKK        | -0.816 | 1.924E-01 | 3.138E-02 |
| CLEC3A      | -0.816 | 1.344E-01 | 1.058E-02 |
| AC024940.1  | -0.817 | 2.981E-03 | 3.766E-02 |
| CCDC187     | -0.817 | 1.890E-02 | 1.986E-02 |
| GPLY        | -0.818 | 9.329E-03 | 1.694E-01 |
| AFF2        | -0.819 | 1.355E-02 | 4.247E-02 |
| LINC00371   | -0.819 | 2.162E-01 | 5.251E-03 |
| HOXB9       | -0.820 | 8.120E-03 | 4.680E-05 |
| CLC         | -0.821 | 7.379E-02 | 5.012E-02 |
| SLITRK1     | -0.823 | 2.444E-01 | 5.167E-04 |
| CHGB        | -0.823 | 1.558E-02 | 3.550E-04 |
| FOXF2       | -0.826 | 9.300E-05 | 4.925E-02 |
| SLC30A10    | -0.827 | 5.033E-02 | 1.122E-03 |
| APBB1IP     | -0.827 | 1.214E-03 | 9.132E-04 |
| SPINK6      | -0.827 | 1.254E-01 | 1.410E-03 |
| TF          | -0.827 | 1.342E-02 | 3.517E-04 |
| HBQ1        | -0.827 | 3.425E-02 | 2.663E-02 |
| KRTDAP      | -0.830 | 1.258E-01 | 4.521E-02 |
| RBFOX1      | -0.831 | 1.219E-01 | 3.510E-01 |
| OLIG2       | -0.832 | 1.065E-01 | 4.560E-06 |
| ELAVL3      | -0.834 | 2.941E-02 | 1.290E-01 |
| SPDYE2B     | -0.834 | 3.079E-02 | 7.826E-03 |
| SLCO6A1     | -0.835 | 5.610E-02 | 3.613E-04 |
| HS6ST3      | -0.835 | 7.780E-02 | 1.533E-02 |
| GATA4       | -0.835 | 1.504E-01 | 3.480E-02 |
| TMPRSS11F   | -0.836 | 1.844E-01 | 5.819E-04 |
| WNT5A       | -0.836 | 6.793E-04 | 8.639E-03 |
| GBX1        | -0.837 | 1.214E-01 | 2.781E-03 |
| AGTR2       | -0.837 | 2.689E-01 | 5.813E-02 |
| GZMH        | -0.840 | 5.745E-03 | 4.698E-03 |
| TTC24       | -0.841 | 8.128E-03 | 3.340E-05 |
| FOXH1       | -0.843 | 3.340E-03 | 2.824E-04 |
| CALHM3      | -0.843 | 2.750E-02 | 3.263E-02 |
| UTS2        | -0.844 | 8.767E-03 | 2.310E-03 |
| PRF1        | -0.844 | 1.979E-03 | 5.451E-04 |
| MIR148B     | -0.844 | 1.663E-01 | 2.203E-04 |
| ABCA10      | -0.845 | 2.277E-03 | 5.430E-05 |
| CCL15-CCL14 | -0.846 | 1.628E-01 | 1.194E-03 |
| APOA4       | -0.847 | 5.444E-01 | 1.861E-03 |
| MIR708      | -0.848 | 1.328E-01 | 4.281E-01 |
| C12orf40    | -0.848 | 1.816E-01 | 7.442E-03 |
| NEFH        | -0.849 | 1.104E-03 | 1.070E-01 |

|            |        |           |           |
|------------|--------|-----------|-----------|
| ALOX15B    | -0.849 | 2.826E-03 | 5.130E-06 |
| AGR3       | -0.850 | 5.280E-02 | 1.423E-03 |
| SOX15      | -0.852 | 3.831E-03 | 1.094E-02 |
| R3HDML     | -0.852 | 4.744E-01 | 3.513E-02 |
| CXCL11     | -0.853 | 2.481E-02 | 4.773E-03 |
| AC110814.1 | -0.853 | 7.384E-03 | 5.520E-05 |
| ANKRD20A2  | -0.855 | 1.986E-01 | 3.653E-02 |
| MCF2       | -0.856 | 6.842E-04 | 5.528E-04 |
| BEST3      | -0.857 | 4.603E-02 | 4.053E-04 |
| TUBA3C     | -0.859 | 3.803E-01 | 1.181E-02 |
| VNN2       | -0.862 | 8.885E-04 | 5.019E-03 |
| ZNF683     | -0.864 | 6.176E-03 | 1.010E-02 |
| AKAP7      | -0.864 | 1.700E-09 | 4.786E-03 |
| GPR174     | -0.866 | 7.710E-03 | 9.850E-06 |
| UGT2B15    | -0.867 | 7.551E-02 | 9.323E-03 |
| BEND4      | -0.867 | 6.176E-03 | 1.321E-03 |
| MT3        | -0.870 | 1.129E-02 | 3.732E-03 |
| ISX        | -0.871 | 1.810E-01 | 1.411E-02 |
| GPR6       | -0.872 | 3.043E-01 | 8.133E-03 |
| TRIM49B    | -0.873 | 6.181E-01 | 4.479E-04 |
| GUCY2D     | -0.873 | 5.060E-04 | 2.450E-03 |
| PKLR       | -0.876 | 1.203E-02 | 1.017E-02 |
| ZIC3       | -0.879 | 4.835E-01 | 6.891E-02 |
| NPIPB11    | -0.880 | 2.053E-04 | 1.097E-04 |
| NKX2-5     | -0.880 | 1.398E-01 | 1.358E-04 |
| GRM4       | -0.881 | 6.130E-03 | 1.750E-01 |
| T          | -0.881 | 2.141E-01 | 1.337E-03 |
| DCAF8L1    | -0.882 | 4.408E-01 | 7.049E-04 |
| UGT2A1     | -0.882 | 9.748E-02 | 2.131E-03 |
| PPP4R4     | -0.883 | 3.417E-02 | 2.785E-03 |
| SOHLH1     | -0.883 | 6.335E-02 | 2.497E-03 |
| INSL6      | -0.884 | 7.678E-02 | 3.030E-03 |
| HBB        | -0.884 | 1.156E-03 | 9.808E-04 |
| CA8        | -0.885 | 9.522E-03 | 8.997E-03 |
| UGT3A1     | -0.889 | 2.574E-01 | 4.270E-05 |
| CBSL       | -0.890 | 2.178E-02 | 4.673E-02 |
| TBX15      | -0.890 | 1.251E-04 | 1.384E-04 |
| HNF4A      | -0.890 | 1.286E-02 | 7.887E-02 |
| SPATA19    | -0.891 | 2.552E-01 | 3.218E-01 |
| IL9R       | -0.892 | 8.427E-04 | 1.792E-02 |
| PSG1       | -0.892 | 2.890E-01 | 1.407E-01 |
| C9orf57    | -0.893 | 1.278E-01 | 7.385E-03 |
| GYS2       | -0.895 | 4.530E-04 | 6.270E-05 |
| AFP        | -0.896 | 1.118E-01 | 1.912E-04 |
| TCP11      | -0.897 | 1.275E-02 | 3.231E-03 |
| MIR572     | -0.899 | NA        | 5.190E-05 |
| TGM6       | -0.899 | 2.956E-01 | 1.033E-04 |
| LAMB4      | -0.899 | 1.251E-04 | 2.930E-06 |
| KRT14      | -0.901 | 7.620E-02 | 2.470E-05 |
| C1QTNF12   | -0.902 | 6.120E-05 | 1.905E-01 |



|            |        |           |           |
|------------|--------|-----------|-----------|
| AMY2B      | -0.903 | 4.580E-05 | 1.596E-02 |
| MPV17L     | -0.903 | 4.805E-04 | 1.005E-02 |
| MIR6784    | -0.904 | 5.909E-03 | 5.495E-03 |
| NXF3       | -0.905 | 9.116E-04 | 1.165E-02 |
| PAX8       | -0.909 | 6.574E-04 | 2.084E-02 |
| SLITRK6    | -0.910 | 2.866E-03 | 2.510E-03 |
| SERPINA10  | -0.910 | 5.632E-02 | 5.733E-04 |
| GCNT3      | -0.911 | 6.967E-03 | 2.735E-04 |
| MGAM2      | -0.912 | 9.894E-02 | 1.099E-02 |
| AMELX      | -0.912 | 3.493E-01 | 6.945E-02 |
| SLC22A31   | -0.912 | 1.068E-02 | 1.351E-03 |
| C3orf30    | -0.913 | 3.638E-02 | 3.440E-03 |
| RXFP1      | -0.914 | 2.934E-04 | 7.931E-03 |
| SATL1      | -0.915 | 5.288E-02 | 6.305E-02 |
| CHAT       | -0.916 | 2.570E-01 | 2.287E-04 |
| DPPA2      | -0.916 | 3.959E-01 | 8.282E-03 |
| GOLGA7B    | -0.916 | 4.983E-04 | 5.765E-02 |
| MIR581     | -0.919 | 8.674E-02 | 1.015E-04 |
| KRT1       | -0.919 | 8.461E-02 | 3.515E-03 |
| NKAIN2     | -0.921 | 1.541E-02 | 1.634E-02 |
| RFX4       | -0.921 | 6.455E-02 | 6.919E-03 |
| MAGEA9     | -0.922 | 3.240E-01 | 2.960E-02 |
| MIR6774    | -0.924 | 2.127E-01 | 1.670E-02 |
| REG1B      | -0.925 | NA        | 2.166E-04 |
| AC015813.2 | -0.926 | 1.140E-02 | 1.442E-04 |
| KRTAP4-8   | -0.927 | 3.918E-01 | 3.263E-04 |
| C1orf61    | -0.928 | 3.257E-03 | 1.656E-04 |
| SLURP1     | -0.928 | 7.207E-03 | 4.490E-07 |
| ATOH8      | -0.930 | 1.618E-03 | 1.314E-04 |
| GALNT13    | -0.930 | 1.967E-03 | 2.404E-03 |
| TCL1B      | -0.932 | 3.284E-01 | 3.690E-04 |
| NUTM2F     | -0.934 | 5.562E-03 | 2.634E-02 |
| MMP10      | -0.936 | 2.098E-02 | 2.339E-04 |
| DEFA3      | -0.937 | 1.516E-01 | 4.081E-04 |
| DOK7       | -0.938 | 3.900E-05 | 1.881E-03 |
| PLA2G4D    | -0.938 | 1.073E-03 | 4.054E-01 |
| OBP2B      | -0.939 | 7.048E-02 | 3.988E-03 |
| CYP4Z1     | -0.939 | 3.613E-03 | 4.059E-02 |
| TNIP3      | -0.940 | 3.613E-03 | 6.000E-03 |
| REN        | -0.942 | 8.128E-03 | 6.170E-05 |
| FOXC2      | -0.942 | 1.073E-03 | 2.780E-05 |
| SST        | -0.943 | 2.203E-01 | 6.601E-04 |
| RHAG       | -0.945 | 1.806E-01 | 2.276E-02 |
| STRA8      | -0.946 | 1.190E-01 | 1.558E-04 |
| FGL1       | -0.946 | 9.374E-02 | 3.930E-05 |
| TUBB4A     | -0.947 | 2.461E-03 | 7.539E-03 |
| P2RX6      | -0.947 | 4.699E-04 | 9.979E-03 |
| OCA2       | -0.951 | 3.829E-02 | 1.720E-05 |
| SYT9       | -0.951 | 1.144E-02 | 7.850E-05 |
| AC110611.1 | -0.954 | 6.066E-02 | 3.084E-02 |

|            |        |           |           |
|------------|--------|-----------|-----------|
| LRC4-KLRK  | -0.954 | 8.411E-04 | 4.398E-02 |
| NPHS1      | -0.955 | 3.637E-02 | 5.044E-03 |
| ZFP42      | -0.957 | 7.811E-02 | 3.231E-02 |
| ASCL4      | -0.957 | 7.325E-02 | 1.394E-03 |
| FGF3       | -0.958 | 5.170E-01 | 5.509E-02 |
| AGR2       | -0.960 | 1.067E-03 | 1.566E-02 |
| SPRR2A     | -0.963 | 6.144E-02 | 1.892E-03 |
| PLA2G10    | -0.966 | 4.087E-04 | 4.280E-07 |
| TMEM178A   | -0.966 | 1.680E-04 | 3.500E-02 |
| LGALS7     | -0.967 | 1.258E-01 | 1.365E-03 |
| BRINP2     | -0.967 | 4.630E-02 | 9.026E-04 |
| MMP1       | -0.970 | 4.745E-03 | 5.502E-03 |
| HKDC1      | -0.974 | 5.215E-03 | 1.525E-04 |
| COLEC10    | -0.977 | 5.848E-04 | 4.860E-05 |
| CLCA4      | -0.979 | 3.341E-02 | 3.561E-02 |
| GALNTL5    | -0.979 | 1.119E-01 | 7.027E-04 |
| HCN1       | -0.981 | 1.462E-01 | 2.208E-02 |
| MUCL1      | -0.985 | 1.058E-02 | 3.369E-02 |
| IFNG       | -0.986 | 8.139E-03 | 7.762E-04 |
| GIF        | -0.986 | 8.224E-02 | 2.100E-05 |
| ISM2       | -0.988 | 3.391E-04 | 1.293E-03 |
| MSGN1      | -0.988 | 2.936E-01 | 5.595E-04 |
| BPIFA2     | -0.991 | 6.977E-02 | 4.472E-04 |
| GFAP       | -0.991 | 1.098E-04 | 1.864E-01 |
| ITIH2      | -0.991 | 7.964E-04 | 4.360E-05 |
| TFAP2B     | -0.992 | 6.577E-02 | 7.099E-04 |
| GBP5       | -0.992 | 3.125E-03 | 8.040E-02 |
| MIR196A1   | -0.993 | 2.583E-02 | 1.558E-02 |
| C14orf39   | -0.993 | 6.060E-03 | 8.943E-03 |
| SP9        | -0.994 | 8.739E-02 | 1.588E-03 |
| GALNTL6    | -0.997 | 2.440E-05 | 3.840E-05 |
| MIR6075    | -0.998 | 8.422E-02 | 6.407E-04 |
| FAM153B    | -1.005 | 8.087E-03 | 9.524E-04 |
| ASCL1      | -1.007 | 1.862E-02 | 1.469E-01 |
| PACRG      | -1.010 | 1.682E-03 | 3.899E-01 |
| ADH1C      | -1.010 | 1.298E-02 | 2.451E-03 |
| AQP10      | -1.010 | 4.236E-03 | 1.948E-03 |
| LCE3D      | -1.011 | 2.280E-01 | 8.995E-03 |
| MTNR1A     | -1.013 | 5.646E-02 | 2.364E-03 |
| FABP9      | -1.013 | 2.361E-02 | 7.216E-03 |
| CDH10      | -1.014 | 6.259E-02 | 1.502E-02 |
| EPHB6      | -1.014 | 3.740E-05 | 8.000E-05 |
| ESX1       | -1.017 | 9.728E-02 | 3.046E-02 |
| ASB4       | -1.017 | 1.469E-02 | 4.858E-03 |
| IFNE       | -1.017 | 4.243E-03 | 3.397E-03 |
| AC011473.4 | -1.018 | 1.646E-01 | 8.251E-03 |
| CAPN8      | -1.020 | 8.563E-03 | 9.794E-04 |
| NKAIN3     | -1.020 | 3.403E-02 | 2.744E-01 |
| UTS2R      | -1.021 | 3.540E-02 | 1.801E-03 |
| FRMPD1     | -1.022 | 2.897E-03 | 7.006E-04 |

|           |        |           |           |
|-----------|--------|-----------|-----------|
| MS4A12    | -1.022 | 3.175E-01 | 1.886E-03 |
| LCE1F     | -1.023 | 1.264E-01 | 2.570E-08 |
| MYBPC1    | -1.031 | 2.764E-02 | 1.395E-03 |
| CCDC190   | -1.032 | 3.829E-02 | 4.647E-02 |
| LCE1C     | -1.032 | 7.280E-02 | 4.680E-08 |
| PNPLA5    | -1.033 | 1.705E-01 | 6.710E-05 |
| KIAA1024L | -1.035 | 3.948E-02 | 3.141E-02 |
| SPANXB1   | -1.036 | 2.961E-01 | 6.448E-04 |
| KLRC4     | -1.038 | 5.821E-04 | 4.597E-02 |
| SMR3B     | -1.040 | NA        | 2.107E-03 |
| GRM3      | -1.041 | 3.105E-03 | 1.170E-06 |
| KIR2DL1   | -1.041 | 1.673E-02 | 1.257E-01 |
| KRTAP1-3  | -1.041 | 3.905E-01 | 7.113E-03 |
| NCAN      | -1.042 | 2.654E-03 | 3.386E-04 |
| HGD       | -1.045 | 1.240E-04 | 3.761E-03 |
| KRTAP5-10 | -1.048 | 3.340E-03 | 1.367E-04 |
| C1QTNF8   | -1.051 | 1.835E-01 | 1.788E-03 |
| ADAMTS19  | -1.053 | 4.924E-03 | 1.806E-02 |
| KIR2DL4   | -1.054 | 7.403E-04 | 3.875E-02 |
| CST4      | -1.055 | 9.405E-03 | 1.254E-02 |
| CDH17     | -1.055 | 3.442E-04 | 1.522E-01 |
| DYNAP     | -1.061 | 1.586E-01 | 2.830E-04 |
| CD177     | -1.062 | 6.574E-04 | 3.268E-02 |
| GRIK3     | -1.063 | 4.522E-04 | 8.800E-03 |
| PI3       | -1.064 | 2.724E-02 | 3.792E-03 |
| F2        | -1.072 | 5.419E-03 | 1.319E-03 |
| MAGEA11   | -1.074 | 2.703E-02 | 2.751E-02 |
| DEFA5     | -1.078 | NA        | 4.620E-06 |
| C2orf66   | -1.084 | 3.420E-05 | 3.054E-04 |
| SPIB      | -1.085 | 4.805E-04 | 2.694E-03 |
| CDHR1     | -1.085 | 2.376E-04 | 4.815E-03 |
| HEPHL1    | -1.089 | 4.318E-03 | 5.075E-04 |
| ALPPL2    | -1.090 | 1.504E-02 | 2.793E-04 |
| SPANXD    | -1.091 | 4.778E-01 | 4.040E-05 |
| IGFBP2    | -1.092 | 1.300E-05 | 1.038E-03 |
| CYP3A5    | -1.092 | 2.996E-04 | 2.221E-04 |
| IL17REL   | -1.093 | 1.654E-03 | 1.520E-06 |
| LUZP2     | -1.096 | 3.615E-03 | 7.828E-04 |
| SPOCD1    | -1.097 | 4.920E-05 | 2.916E-03 |
| MUC5B     | -1.100 | 5.519E-03 | 2.351E-01 |
| SDR16C5   | -1.103 | 1.128E-02 | 2.740E-08 |
| KRTAP3-3  | -1.104 | NA        | 2.384E-02 |
| PSG6      | -1.104 | 1.817E-01 | 2.619E-03 |
| KIAA1324  | -1.104 | 1.480E-05 | 2.072E-03 |
| KIR3DL2   | -1.105 | 8.169E-03 | 1.161E-02 |
| NOS2      | -1.107 | 5.700E-05 | 1.120E-07 |
| SPOCK3    | -1.110 | 4.314E-03 | 3.770E-05 |
| CFHR5     | -1.114 | 1.954E-01 | 2.562E-02 |
| NKX2-1    | -1.116 | 9.322E-02 | 9.440E-07 |
| MYRFL     | -1.116 | 9.980E-05 | 3.972E-03 |

|            |        |           |           |
|------------|--------|-----------|-----------|
| KCNH5      | -1.118 | 3.179E-02 | 5.648E-03 |
| ALPI       | -1.120 | 2.760E-01 | 7.300E-08 |
| CLDN10     | -1.124 | 2.051E-03 | 1.321E-04 |
| MBL2       | -1.124 | 2.001E-01 | 2.320E-05 |
| CHST9      | -1.125 | 4.872E-02 | 9.084E-04 |
| FAM9B      | -1.126 | 5.071E-02 | 2.806E-01 |
| TSGA10IP   | -1.126 | 5.989E-04 | 8.275E-04 |
| WFDC12     | -1.127 | 5.096E-02 | 3.482E-03 |
| KRT85      | -1.132 | 1.271E-02 | 1.088E-04 |
| HEMGN      | -1.133 | 2.688E-02 | 1.210E-03 |
| TRIM48     | -1.134 | 5.126E-01 | 1.834E-03 |
| OR56A3     | -1.137 | 3.056E-01 | 3.410E-05 |
| CDH16      | -1.137 | 2.078E-02 | 6.061E-04 |
| MSTN       | -1.139 | 5.050E-05 | 6.009E-02 |
| C1orf168   | -1.141 | 1.073E-03 | 1.977E-04 |
| PON3       | -1.145 | 1.457E-03 | 2.196E-03 |
| INSM1      | -1.150 | 2.323E-03 | 2.404E-02 |
| NRSN1      | -1.151 | 5.147E-02 | 2.069E-03 |
| PNLIPRP3   | -1.153 | 1.237E-01 | 8.855E-04 |
| USH1C      | -1.154 | 9.489E-03 | 1.809E-03 |
| LY6D       | -1.155 | 2.589E-03 | 5.070E-01 |
| STATH      | -1.155 | 2.513E-01 | 3.227E-03 |
| PRAC1      | -1.160 | 9.777E-02 | 5.783E-03 |
| ANKRD30A   | -1.161 | 7.090E-02 | 2.920E-03 |
| TENM2      | -1.163 | 1.495E-02 | 3.490E-05 |
| PON1       | -1.164 | 2.771E-03 | 2.051E-03 |
| HTN1       | -1.168 | 4.148E-01 | 5.791E-03 |
| IDO1       | -1.170 | 7.964E-04 | 2.616E-02 |
| SERPINA6   | -1.173 | 1.848E-02 | 1.629E-02 |
| OPRM1      | -1.178 | 2.750E-02 | 1.170E-06 |
| FLJ22763   | -1.181 | NA        | 6.987E-03 |
| GUCA1C     | -1.182 | 3.339E-01 | 6.650E-07 |
| KRT84      | -1.183 | 4.116E-02 | 2.415E-03 |
| VWC2L      | -1.184 | 5.519E-03 | 6.391E-04 |
| SLC6A5     | -1.184 | 1.331E-01 | 6.780E-06 |
| BTBD16     | -1.185 | 2.166E-03 | 1.130E-06 |
| CPNE6      | -1.188 | 1.116E-03 | 1.415E-04 |
| SCGB1A1    | -1.191 | 8.449E-02 | 8.228E-04 |
| CLRN3      | -1.193 | 4.325E-04 | 1.163E-03 |
| AJAP1      | -1.198 | 1.110E-06 | 8.410E-08 |
| HTN3       | -1.203 | 4.551E-01 | 5.640E-05 |
| NLRP4      | -1.205 | 2.805E-02 | 6.680E-02 |
| MS4A8      | -1.207 | 3.664E-02 | 6.768E-03 |
| STEAP1B    | -1.209 | 1.864E-04 | 1.684E-03 |
| AL035425.2 | -1.211 | 2.791E-01 | 1.470E-08 |
| IFNA1      | -1.213 | 8.034E-03 | 1.050E-05 |
| LRRC10     | -1.216 | 3.006E-01 | 2.210E-07 |
| CNPY1      | -1.220 | 7.945E-02 | 9.780E-06 |
| MUC5AC     | -1.223 | 1.066E-02 | 7.780E-09 |
| MYOD1      | -1.224 | 1.419E-01 | 1.980E-05 |

|            |        |           |           |
|------------|--------|-----------|-----------|
| CALN1      | -1.224 | 3.653E-03 | 4.120E-06 |
| SPINK7     | -1.225 | 2.689E-03 | 4.731E-04 |
| AC005885.1 | -1.228 | 2.097E-01 | 1.030E-06 |
| PAH        | -1.230 | 3.849E-03 | 1.639E-02 |
| F13B       | -1.231 | 1.718E-02 | 2.962E-03 |
| ADH7       | -1.234 | 3.166E-02 | 2.619E-04 |
| TESC       | -1.236 | 8.200E-05 | 1.068E-02 |
| RLBP1      | -1.242 | 3.319E-03 | 4.134E-03 |
| H2AFB1     | -1.242 | 6.280E-02 | 6.070E-07 |
| HTR3C      | -1.247 | 5.710E-03 | 6.570E-07 |
| NTSR1      | -1.251 | 1.251E-04 | 6.503E-04 |
| LPA        | -1.254 | 8.987E-04 | 4.305E-03 |
| KEL        | -1.258 | 2.390E-06 | 8.000E-05 |
| PSG7       | -1.259 | 2.191E-01 | 8.660E-08 |
| PRR27      | -1.262 | 1.262E-01 | 2.295E-01 |
| TRIM49     | -1.263 | 3.934E-01 | 6.870E-03 |
| GSTA2      | -1.264 | 1.909E-02 | 2.990E-04 |
| GLYATL2    | -1.265 | 1.618E-03 | 4.748E-03 |
| VSIG1      | -1.272 | 1.110E-06 | 2.670E-08 |
| NGB        | -1.276 | 5.768E-03 | 2.520E-05 |
| ISL1       | -1.278 | 1.957E-03 | 7.790E-07 |
| SLC17A1    | -1.286 | 1.275E-01 | 7.307E-04 |
| COL2A1     | -1.288 | 1.680E-04 | 2.951E-03 |
| TNNT3      | -1.293 | 9.116E-04 | 3.110E-03 |
| LRRC38     | -1.297 | 4.243E-03 | 3.850E-07 |
| QRFPR      | -1.301 | 2.407E-02 | 4.976E-03 |
| TRIM10     | -1.307 | 1.570E-03 | 2.044E-01 |
| CLDN19     | -1.321 | 4.493E-03 | 2.945E-04 |
| DDC        | -1.321 | 6.842E-04 | 3.645E-03 |
| HSD17B2    | -1.323 | 1.310E-05 | 6.104E-03 |
| KLK10      | -1.325 | 3.167E-03 | 8.090E-05 |
| SERPINA11  | -1.328 | 3.079E-02 | 8.492E-03 |
| SLC18A3    | -1.328 | 1.021E-01 | 4.184E-03 |
| KRTAP19-5  | -1.328 | 5.502E-01 | 2.086E-04 |
| TFF2       | -1.330 | 2.847E-03 | 6.127E-04 |
| IP6K3      | -1.334 | 5.000E-05 | 1.240E-07 |
| NR5A1      | -1.336 | 8.385E-04 | 1.550E-07 |
| CLVS2      | -1.336 | 1.067E-02 | 5.230E-07 |
| MORC1      | -1.339 | 4.852E-02 | 2.600E-11 |
| RXFP2      | -1.340 | 2.407E-01 | 7.110E-06 |
| PLA2G2E    | -1.342 | 6.399E-02 | 1.491E-04 |
| HOXC12     | -1.346 | 2.238E-02 | 4.280E-03 |
| LGR5       | -1.346 | 1.306E-04 | 5.665E-03 |
| DEFB4A     | -1.348 | 1.466E-01 | 5.500E-06 |
| ERN2       | -1.354 | 5.956E-04 | 1.743E-04 |
| GSTA1      | -1.355 | 5.041E-03 | 1.069E-02 |
| HABP2      | -1.358 | 1.397E-03 | 3.641E-03 |
| KCNA4      | -1.361 | 7.483E-02 | 5.166E-03 |
| UGT2B28    | -1.362 | 3.615E-03 | 2.680E-05 |
| FRMD1      | -1.371 | 3.691E-03 | 1.592E-02 |

|           |        |           |           |
|-----------|--------|-----------|-----------|
| UGT2B11   | -1.372 | 3.613E-03 | 5.850E-06 |
| PASD1     | -1.373 | 9.661E-02 | 4.703E-03 |
| CPLX2     | -1.377 | 1.110E-03 | 9.930E-07 |
| BARHL2    | -1.385 | 1.132E-01 | 6.390E-08 |
| KRT28     | -1.392 | 2.584E-01 | 3.340E-05 |
| SFTPB     | -1.393 | 4.710E-05 | 1.918E-02 |
| NEUROD1   | -1.393 | 1.277E-01 | 2.272E-03 |
| ONECUT3   | -1.397 | 4.540E-05 | 2.510E-09 |
| F9        | -1.399 | 3.519E-01 | 5.960E-10 |
| MT4       | -1.402 | 3.947E-01 | 7.295E-02 |
| PRSS1     | -1.403 | 1.015E-02 | 3.410E-06 |
| VRTN      | -1.406 | 1.902E-02 | 2.291E-04 |
| KCTD16    | -1.409 | 5.160E-07 | 5.310E-05 |
| NAA11     | -1.426 | 3.363E-02 | 5.890E-08 |
| CASR      | -1.430 | 1.681E-04 | 4.260E-05 |
| C6orf10   | -1.439 | 5.569E-03 | 1.613E-04 |
| KLHL1     | -1.442 | 1.562E-01 | 1.473E-03 |
| DUOXA2    | -1.444 | 3.740E-05 | 1.620E-05 |
| VWC2      | -1.446 | 6.793E-04 | 2.987E-04 |
| BRINP1    | -1.448 | 4.960E-05 | 1.137E-02 |
| MAGEB2    | -1.452 | 1.094E-02 | 1.370E-05 |
| CLCA1     | -1.453 | 2.944E-03 | 4.860E-11 |
| RXFP4     | -1.460 | 1.010E-05 | 7.599E-02 |
| CFTR      | -1.461 | 3.700E-05 | 6.922E-02 |
| CRH       | -1.462 | 2.051E-02 | 6.440E-08 |
| KHDC1L    | -1.463 | 2.294E-03 | 4.650E-06 |
| HNF1A     | -1.466 | 3.613E-04 | 1.070E-06 |
| CYP1A2    | -1.477 | 1.753E-02 | 1.420E-07 |
| BTNL3     | -1.481 | 2.513E-03 | 4.214E-03 |
| C6orf15   | -1.482 | 1.558E-02 | 3.070E-08 |
| MEP1A     | -1.487 | 3.730E-06 | 2.976E-03 |
| ANXA10    | -1.506 | 1.976E-03 | 4.520E-02 |
| IL36G     | -1.509 | 1.243E-04 | 5.880E-05 |
| KRT81     | -1.510 | 4.080E-05 | 2.920E-09 |
| TCP10L2   | -1.511 | 1.955E-02 | 5.868E-04 |
| SHH       | -1.514 | 3.037E-04 | 8.930E-09 |
| KRTAP5-11 | -1.516 | 3.493E-03 | 2.455E-03 |
| DCAF4L2   | -1.524 | 1.757E-01 | 4.170E-07 |
| TSPAN8    | -1.525 | 3.650E-05 | 3.030E-06 |
| AZGP1     | -1.526 | 7.040E-06 | 2.860E-06 |
| PLA2G3    | -1.527 | 2.051E-03 | 8.140E-06 |
| SPHKAP    | -1.530 | 4.853E-02 | 7.860E-12 |
| PIWIL1    | -1.539 | 9.040E-05 | 1.010E-08 |
| C10orf82  | -1.542 | 2.712E-04 | 8.320E-06 |
| CT45A1    | -1.545 | 1.779E-01 | 9.030E-08 |
| UGT2B10   | -1.559 | 8.437E-02 | 1.715E-03 |
| PAX7      | -1.571 | 1.286E-02 | 2.577E-04 |
| GGT2      | -1.579 | 1.251E-04 | 4.480E-10 |
| CYP1A1    | -1.583 | 4.650E-03 | 8.649E-04 |
| KLK12     | -1.592 | 1.700E-03 | 1.077E-04 |

|           |        |           |           |
|-----------|--------|-----------|-----------|
| ATOH1     | -1.597 | 4.561E-02 | 6.167E-04 |
| AMBN      | -1.614 | 8.665E-02 | 3.880E-06 |
| TFF3      | -1.618 | 5.470E-06 | 1.972E-04 |
| PAGE2     | -1.618 | 5.616E-02 | 1.042E-02 |
| CA1       | -1.621 | 1.557E-04 | 1.129E-03 |
| SLC6A15   | -1.633 | 4.954E-03 | 1.196E-03 |
| OLFM3     | -1.638 | 1.931E-02 | 2.026E-04 |
| CHP2      | -1.639 | 1.140E-05 | 1.445E-02 |
| ROS1      | -1.645 | 4.460E-05 | 2.640E-07 |
| FOXN4     | -1.661 | 7.827E-04 | 1.548E-01 |
| NOBOX     | -1.666 | 5.147E-02 | 1.200E-07 |
| KRT75     | -1.668 | 1.618E-03 | 1.106E-04 |
| FDCSP     | -1.671 | 5.848E-04 | 6.360E-07 |
| MSMB      | -1.695 | 1.050E-05 | 1.170E-06 |
| OTX2      | -1.698 | 2.536E-02 | 4.389E-04 |
| LCN15     | -1.725 | 1.708E-03 | 1.830E-08 |
| DMBT1     | -1.734 | 7.590E-06 | 3.990E-10 |
| SULT1C2   | -1.747 | 6.910E-11 | 1.440E-08 |
| LIN28A    | -1.748 | 1.092E-04 | 1.552E-03 |
| PHGR1     | -1.749 | 3.529E-03 | 5.354E-04 |
| VIL1      | -1.757 | 4.480E-06 | 9.369E-04 |
| AQP4      | -1.759 | 5.380E-03 | 3.273E-04 |
| LINC01207 | -1.772 | 7.800E-05 | 4.970E-05 |
| RALYL     | -1.809 | 2.277E-03 | 1.793E-01 |
| SERPINB11 | -1.814 | 4.550E-04 | 2.532E-02 |
| TINAG     | -1.827 | 2.939E-02 | 1.453E-03 |
| SPINK4    | -1.832 | 1.080E-05 | 4.690E-06 |
| PRSS2     | -1.835 | 2.487E-04 | 3.179E-02 |
| TMPRSS11D | -1.846 | 9.980E-05 | 1.981E-04 |
| CA10      | -1.855 | 9.188E-04 | 5.460E-07 |
| FGF20     | -1.858 | 2.872E-04 | 1.160E-16 |
| TRIM15    | -1.862 | 4.160E-06 | 1.590E-05 |
| MPPED1    | -1.863 | 3.010E-05 | 2.430E-05 |
| AMTN      | -1.867 | 1.331E-04 | 6.160E-06 |
| TM4SF20   | -1.884 | 4.540E-05 | 2.590E-07 |
| RTL1      | -1.889 | 4.955E-03 | 5.130E-06 |
| TTR       | -1.909 | 8.424E-04 | 6.700E-07 |
| SCGN      | -1.916 | 2.284E-03 | 2.730E-12 |
| SRD5A2    | -1.929 | 1.700E-09 | 1.066E-02 |
| GHRH      | -1.937 | 1.634E-02 | 1.930E-05 |
| SP8       | -1.955 | 5.519E-03 | 9.498E-03 |
| MROH2A    | -1.959 | 9.840E-09 | 7.790E-10 |
| LRTM1     | -1.963 | 1.219E-04 | 1.200E-02 |
| WIF1      | -1.971 | 3.740E-05 | 7.660E-08 |
| CPB1      | -1.974 | 2.250E-06 | 6.950E-06 |
| GKN1      | -1.980 | 6.640E-05 | 2.830E-07 |
| C11orf86  | -1.982 | 7.410E-06 | 6.303E-03 |
| OR52E8    | -1.992 | 2.077E-02 | 3.057E-03 |
| KRTAP11-1 | -2.003 | 1.387E-01 | 2.170E-02 |
| NEFL      | -2.016 | 1.050E-05 | 2.459E-02 |

|           |        |           |           |
|-----------|--------|-----------|-----------|
| SLC17A4   | -2.025 | 9.624E-03 | 1.550E-09 |
| TMEM207   | -2.028 | 8.436E-02 | 4.823E-04 |
| CTCF      | -2.030 | 8.290E-05 | 8.390E-06 |
| CRTAC1    | -2.040 | 2.490E-07 | 3.640E-07 |
| GNAT3     | -2.063 | 8.648E-03 | 3.430E-09 |
| BPIFB2    | -2.072 | 1.092E-03 | 8.213E-03 |
| FABP7     | -2.072 | 1.471E-04 | 3.550E-10 |
| FABP4     | -2.094 | 6.990E-09 | 2.177E-03 |
| TFF1      | -2.161 | 2.880E-07 | 3.476E-02 |
| SSTR5     | -2.172 | 1.500E-05 | 1.060E-06 |
| MUC13     | -2.175 | 1.000E-09 | 5.420E-13 |
| PRSS33    | -2.202 | 9.390E-08 | 4.330E-09 |
| KCNK10    | -2.204 | 7.100E-11 | 9.980E-10 |
| FABP1     | -2.210 | 1.257E-02 | 4.640E-06 |
| REG4      | -2.236 | 2.250E-13 | 5.750E-11 |
| GAD2      | -2.264 | 3.885E-03 | 5.670E-08 |
| LGALS4    | -2.305 | 3.330E-11 | 4.660E-11 |
| VSTM2B    | -2.314 | 3.251E-02 | 1.170E-06 |
| KRT6C     | -2.337 | 3.960E-06 | 1.480E-02 |
| CTSE      | -2.375 | 2.440E-10 | 5.660E-10 |
| KRT6B     | -2.479 | 8.800E-07 | 2.480E-06 |
| SI        | -2.547 | 1.862E-03 | 3.796E-04 |
| GP2       | -2.562 | 2.764E-04 | 7.740E-09 |
| ZP4       | -2.571 | 1.009E-02 | 3.440E-04 |
| KRTAP19-1 | -2.591 | 8.128E-03 | 9.393E-04 |
| FAM9C     | -2.632 | 4.460E-06 | 1.740E-11 |
| NEUROD4   | -2.744 | 5.710E-03 | 2.480E-07 |
| MUC17     | -2.859 | 1.290E-06 | 1.611E-04 |
| NKX6-3    | -2.931 | 4.220E-09 | 2.960E-05 |
| KRTAP13-2 | -3.290 | 6.857E-02 | 1.480E-07 |
| PRSS56    | -3.411 | 6.490E-06 | 2.865E-04 |

---
