# Supplementary material for: An Epithelial-Mesenchymal Transition (EMT) Preoperative Nomogram for Prediction of Lymph Node Metastasis in Bladder Cancer (BLCA)
Source: Hindawi journal article supplement (doi:10.1155/2020/8833972), 2020-11-03
Supplement: f4 [file 8833972.f4.pdf]

| Gene    | expr    | reptime | hic | N_nonsile<br>nt | N_silent | N_noncod<br>ing | n_nonsile<br>nt | n_silent | n_noncodi<br>ng | nnei | x  | X        | p        | q        |
|---------|---------|---------|-----|-----------------|----------|-----------------|-----------------|----------|-----------------|------|----|----------|----------|----------|
| CDKN1A  | 904665  | 228     | 37  | 403704          | 133500   | 0               | 39              | 0        | 0               | 50   | 59 | 18520188 | 0        | 0        |
| CDKN2A  | 225405  | 357     | -15 | 849060          | 221076   | 0               | 20              | 0        | 0               | 50   | 41 | 22001156 | 0        | 0        |
| PSIP1   | 200332  | 583     | 6   | 1453548         | 338556   | 0               | 18              | 1        | 0               | 50   | 51 | 20764412 | 0        | 0        |
| RHOA    | 1623187 | 201     | 33  | 505164          | 133500   | 0               | 16              | 0        | 0               | 37   | 40 | 14298384 | 0        | 0        |
| RHOB    | 621277  | 189     | 19  | 486296          | 144892   | 0               | 20              | 0        | 0               | 50   | 53 | 21143196 | 0        | 0        |
| YIPF7   | 62950   | 1034    | -6  | 727308          | 198648   | 0               | 3               | 0        | 0               | 50   | 54 | 20233972 | 0        | 0        |
| ARID1A  | 975965  | 182     | 27  | 5695288         | 1710224  | 0               | 105             | 5        | 0               | 3    | 30 | 6070868  | 2.22E-16 | 5.24E-13 |
| PIK3CA  | 401889  | 613     | 11  | 2810264         | 700252   | 0               | 81              | 1        | 0               | 19   | 25 | 9039552  | 2.22E-16 | 5.24E-13 |
| TP53    | 2069567 | 213     | 34  | 1099684         | 303668   | 0               | 186             | 3        | 0               | 25   | 34 | 7496292  | 5.55E-16 | 1.16E-12 |
| STAG2   | 338292  | NaN     | 7   | 3391968         | 814884   | 0               | 50              | 6        | 0               | 32   | 29 | 10414780 | 1.11E-15 | 2.09E-12 |
| ELF3    | 751933  | 168     | 31  | 971524          | 254540   | 0               | 61              | 2        | 0               | 36   | 34 | 14461076 | 2.11E-15 | 3.49E-12 |
| ZFP36L1 | 543449  | 259     | 46  | 825564          | 264864   | 0               | 27              | 0        | 0               | 22   | 18 | 8559664  | 2.22E-15 | 3.49E-12 |
| KDM6A   | 59340   | NaN     | 36  | 3633692         | 977932   | 0               | 98              | 5        | 0               | 50   | 56 | 21128244 | 3.11E-15 | 4.51E-12 |
| RB1     | 349930  | 450     | 41  | 2459248         | 628340   | 0               | 77              | 0        | 0               | 3    | 0  | 1821652  | 2.48E-14 | 3.34E-11 |
| FGFR3   | 859388  | 222     | 42  | 2155224         | 666432   | 0               | 55              | 4        | 0               | 34   | 41 | 15698532 | 2.82E-14 | 3.55E-11 |
| EP300   | 1167197 | 154     | 42  | 6166988         | 1698832  | 0               | 70              | 3        | 0               | 5    | 9  | 2911368  | 3.50E-12 | 4.13E-09 |
| TSC1    | 1919595 | 461     | 33  | 2996096         | 826276   | 0               | 26              | 1        | 0               | 12   | 12 | 4879336  | 3.04E-10 | 3.37E-07 |
| FBXW7   | 117295  | 501     | 51  | 2173024         | 582416   | 0               | 29              | 0        | 0               | 5    | 4  | 3387696  | 3.34E-09 | 3.50E-06 |
| HRAS    | 1970020 | 236     | 42  | 550020          | 153792   | 0               | 16              | 0        | 0               | 50   | 66 | 20259248 | 2.55E-07 | 2.53E-04 |
| KLF5    | 274388  | 328     | 28  | 1140624         | 339624   | 0               | 19              | 1        | 0               | 50   | 65 | 20677904 | 3.29E-07 | 3.10E-04 |
| CREBBP  | 637890  | 242     | 39  | 6196180         | 1759352  | 0               | 42              | 8        | 0               | 21   | 38 | 9370632  | 3.58E-07 | 3.22E-04 |
| RBM10   | 819569  | NaN     | 38  | 2410832         | 666076   | 0               | 19              | 3        | 0               | 50   | 54 | 16576428 | 1.27E-06 | 1.09E-03 |
| FOXQ1   | 114944  | 481     | 14  | 943400          | 351016   | 0               | 13              | 3        | 0               | 11   | 13 | 4454984  | 2.53E-06 | 2.08E-03 |
| PARD3   | 139914  | 776     | 0   | 3538996         | 948740   | 0               | 20              | 1        | 0               | 8    | 2  | 4232128  | 3.62E-06 | 2.85E-03 |
| FOXA1   | 67481   | 487     | -58 | 1159136         | 360628   | 0               | 13              | 2        | 0               | 50   | 74 | 17440084 | 5.79E-06 | 4.37E-03 |
| C3orf70 | 760533  | 598     | 32  | 636884          | 171592   | 0               | 15              | 0        | 0               | 50   | 67 | 24319428 | 2.00E-05 | 1.45E-02 |
| NCOR1   | 954548  | 370     | -18 | 6256700         | 1756504  | 0               | 38              | 6        | 0               | 50   | 65 | 20488156 | 2.43E-05 | 1.70E-02 |
| METTL3  | 707390  | 470     | 30  | 1486300         | 422216   | 0               | 18              | 1        | 0               | 50   | 56 | 23682188 | 8.46E-05 | 5.58E-02 |
| MARK2   | 1321109 | 201     | 51  | 2029556         | 575296   | 0               | 9               | 0        | 0               | 15   | 6  | 7966568  | 8.57E-05 | 5.58E-02 |
| CDKN1B  | 791330  | 136     | 44  | 506944          | 139196   | 0               | 7               | 0        | 0               | 50   | 52 | 20311224 | 9.57E-05 | 5.92E-02 |
| ERBB2   | 1284992 | 226     | 38  | 3187980         | 947316   | 0               | 49              | 7        | 0               | 36   | 47 | 13340032 | 9.73E-05 | 5.92E-02 |

|          |         |      |    |         |         |   |    |    |   |    |    |          |          |          |
|----------|---------|------|----|---------|---------|---|----|----|---|----|----|----------|----------|----------|
| NFE2L2   | 372300  | 145  | 36 | 1549668 | 409044  | 0 | 22 | 1  | 0 | 50 | 56 | 19076260 | 1.04E-04 | 6.13E-02 |
| GPS2     | 1911735 | 206  | 36 | 866860  | 228908  | 0 | 11 | 1  | 0 | 50 | 69 | 22072000 | 1.24E-04 | 7.09E-02 |
| ASXL2    | 602691  | 287  | 31 | 3585988 | 1061948 | 0 | 29 | 3  | 0 | 39 | 48 | 19503816 | 1.34E-04 | 7.43E-02 |
| KRAS     | 259193  | 512  | 16 | 610184  | 147028  | 0 | 13 | 0  | 0 | 50 | 60 | 20519840 | 1.42E-04 | 7.63E-02 |
| ASXL1    | 780777  | 242  | 57 | 3834120 | 1161984 | 0 | 25 | 5  | 0 | 50 | 62 | 21383852 | 2.04E-04 | 1.07E-01 |
| TRAF3IP2 | 320530  | 201  | 32 | 1436460 | 411180  | 0 | 15 | 0  | 0 | 20 | 28 | 8850516  | 3.52E-04 | 1.79E-01 |
| SSH3     | 1369264 | 177  | 44 | 1671776 | 498400  | 0 | 17 | 2  | 0 | 44 | 60 | 18796088 | 3.61E-04 | 1.79E-01 |
| SPTAN1   | 1917687 | 197  | 43 | 6519428 | 1659316 | 0 | 43 | 10 | 0 | 6  | 14 | 3518348  | 4.98E-04 | 2.36E-01 |
| KLHDC2   | 642923  | 342  | 12 | 1088292 | 267000  | 0 | 11 | 1  | 0 | 50 | 64 | 27191992 | 5.04E-04 | 2.36E-01 |
| EPHA2    | 866090  | 197  | 37 | 2485236 | 713424  | 0 | 15 | 2  | 0 | 30 | 28 | 11814216 | 5.13E-04 | 2.36E-01 |
| AHR      | 370010  | 410  | 2  | 2191892 | 571024  | 0 | 24 | 1  | 0 | 16 | 22 | 6917436  | 6.84E-04 | 3.07E-01 |
| TFG      | 345618  | 509  | 16 | 1028128 | 286580  | 0 | 9  | 2  | 0 | 44 | 55 | 20652272 | 7.25E-04 | 3.18E-01 |
| PHF3     | 256893  | 371  | 24 | 5253492 | 1344612 | 0 | 25 | 1  | 0 | 19 | 13 | 9175544  | 7.97E-04 | 3.40E-01 |
| ZFP36L2  | 227876  | 208  | 47 | 1181208 | 409044  | 0 | 14 | 3  | 0 | 50 | 48 | 16953432 | 8.26E-04 | 3.40E-01 |
| MBD1     | 229269  | 262  | 51 | 1710224 | 504808  | 0 | 11 | 0  | 0 | 24 | 19 | 9497724  | 8.30E-04 | 3.40E-01 |
| ATM      | 415837  | 582  | 16 | 8044532 | 2014960 | 0 | 54 | 5  | 0 | 3  | 6  | 2869716  | 8.53E-04 | 3.42E-01 |
| KIAA0368 | 366471  | 419  | 28 | 5208636 | 1470636 | 0 | 12 | 0  | 0 | 2  | 0  | 4241740  | 1.01E-03 | 3.89E-01 |
| HES1     | 420702  | 294  | 33 | 690996  | 222144  | 0 | 9  | 1  | 0 | 50 | 60 | 20790044 | 1.01E-03 | 3.89E-01 |
| RBM26    | 161846  | 521  | 30 | 2538636 | 692064  | 0 | 17 | 0  | 0 | 10 | 7  | 5247440  | 1.14E-03 | 4.31E-01 |
| WAC      | 204806  | 355  | 17 | 1669996 | 463868  | 0 | 14 | 2  | 0 | 50 | 49 | 17826700 | 1.24E-03 | 4.57E-01 |
| SIRPD    | 422390  | 424  | 46 | 499468  | 149876  | 0 | 6  | 0  | 0 | 50 | 51 | 20868008 | 1.48E-03 | 5.36E-01 |
| DCLRE1A  | 264051  | 515  | 7  | 2668576 | 700964  | 0 | 16 | 1  | 0 | 40 | 30 | 16881520 | 1.57E-03 | 5.57E-01 |
| TAF11    | 1099530 | 304  | 24 | 553224  | 145248  | 0 | 8  | 0  | 0 | 50 | 60 | 21156012 | 1.70E-03 | 5.94E-01 |
| ERBB3    | 2693176 | 215  | 38 | 3546828 | 1009260 | 0 | 38 | 8  | 0 | 35 | 37 | 12635152 | 1.80E-03 | 6.08E-01 |
| RIMS2    | 198819  | 1035 | -8 | 3634048 | 996800  | 0 | 19 | 3  | 0 | 40 | 38 | 17603844 | 1.80E-03 | 6.08E-01 |
| PTEN     | 259678  | 300  | 34 | 1077968 | 250624  | 0 | 9  | 0  | 0 | 50 | 50 | 18237880 | 1.89E-03 | 6.26E-01 |
| E2F8     | 132848  | 504  | 16 | 2195452 | 632612  | 0 | 16 | 3  | 0 | 50 | 42 | 18586404 | 1.92E-03 | 6.26E-01 |
| BAP1     | 1078407 | 229  | 62 | 1867220 | 540052  | 0 | 17 | 1  | 0 | 7  | 6  | 2946256  | 1.98E-03 | 6.33E-01 |
| FLG2     | 387153  | 671  | 6  | 5887172 | 1785340 | 0 | 29 | 1  | 0 | 3  | 1  | 2462096  | 2.18E-03 | 6.86E-01 |
| SLC17A3  | 313920  | 673  | 30 | 1283024 | 371308  | 0 | 8  | 0  | 0 | 36 | 28 | 16902524 | 2.26E-03 | 6.98E-01 |
| RFTN2    | 647239  | 538  | 26 | 1297264 | 345320  | 0 | 11 | 0  | 0 | 50 | 83 | 26648024 | 2.30E-03 | 7.01E-01 |
| CASP8    | 571730  | 386  | 37 | 1523324 | 344608  | 0 | 13 | 1  | 0 | 50 | 74 | 21850568 | 2.51E-03 | 7.51E-01 |
| GOLGA5   | 360146  | 405  | 41 | 1898192 | 498400  | 0 | 10 | 0  | 0 | 15 | 17 | 9571416  | 2.93E-03 | 8.37E-01 |

|          |         |     |     |         |         |   |    |   |   |    |     |          |          |          |
|----------|---------|-----|-----|---------|---------|---|----|---|---|----|-----|----------|----------|----------|
| RAI14    | 270712  | 554 | -7  | 2628348 | 652548  | 0 | 18 | 0 | 0 | 18 | 12  | 8363152  | 2.93E-03 | 8.37E-01 |
| C8orf34  | 36554   | 910 | -22 | 1137776 | 284800  | 0 | 11 | 1 | 0 | 34 | 35  | 12163452 | 2.95E-03 | 8.37E-01 |
| BTG2     | 574553  | 420 | 26  | 399788  | 116056  | 0 | 6  | 1 | 0 | 10 | 5   | 3111796  | 2.97E-03 | 8.37E-01 |
| GPR89B   | NaN     | NaN | NaN | 1211824 | 313280  | 0 | 11 | 2 | 0 | 50 | 118 | 39958864 | 3.30E-03 | 9.16E-01 |
| TLK2     | 316879  | 370 | -2  | 1995024 | 500892  | 0 | 13 | 0 | 0 | 11 | 8   | 6580304  | 3.70E-03 | 9.92E-01 |
| TAOK3    | 635780  | 823 | 26  | 2390184 | 571380  | 0 | 15 | 2 | 0 | 28 | 21  | 12587448 | 3.77E-03 | 9.92E-01 |
| EDIL3    | 161019  | 764 | -20 | 1262732 | 321112  | 0 | 11 | 2 | 0 | 50 | 64  | 22025008 | 3.78E-03 | 9.92E-01 |
| EEF1A1   | 716887  | 139 | 38  | 1177648 | 335708  | 0 | 10 | 0 | 0 | 20 | 16  | 7067312  | 3.79E-03 | 9.92E-01 |
| ZNF750   | 711691  | 350 | 16  | 1758640 | 565328  | 0 | 16 | 3 | 0 | 50 | 46  | 16906796 | 3.89E-03 | 1        |
| RXRA     | 300063  | 295 | 42  | 1179784 | 342116  | 0 | 19 | 4 | 0 | 15 | 20  | 4435760  | 4.09E-03 | 1        |
| TIGD2    | 147602  | 529 | 24  | 1335000 | 350304  | 0 | 9  | 1 | 0 | 32 | 19  | 12300156 | 4.24E-03 | 1        |
| PTPN3    | 352374  | 431 | 12  | 2404780 | 630476  | 0 | 9  | 4 | 0 | 50 | 60  | 22735584 | 4.24E-03 | 1        |
| EXOSC10  | 577167  | 408 | 34  | 2341768 | 603776  | 0 | 13 | 3 | 0 | 24 | 27  | 10163088 | 4.24E-03 | 1        |
| MECOM    | 215619  | 985 | -10 | 3233192 | 820936  | 0 | 18 | 0 | 0 | 3  | 1   | 1971172  | 4.40E-03 | 1        |
| H3F3B    | 1885370 | 198 | 27  | 343184  | 108580  | 0 | 5  | 0 | 0 | 50 | 68  | 21651920 | 4.45E-03 | 1        |
| HIST1H4L | 228884  | 634 | 40  | 249912  | 86508   | 0 | 4  | 0 | 0 | 50 | 48  | 14804260 | 4.57E-03 | 1        |
| NRAS     | 600650  | 472 | 11  | 500892  | 129228  | 0 | 7  | 0 | 0 | 50 | 62  | 21029988 | 4.61E-03 | 1        |
| NKX2-2   | 283479  | 694 | -10 | 672484  | 209684  | 0 | 9  | 2 | 0 | 11 | 19  | 6145272  | 5.06E-03 | 1        |
| IKBKB    | 514464  | 361 | 44  | 1998228 | 516912  | 0 | 11 | 2 | 0 | 24 | 26  | 9337168  | 5.11E-03 | 1        |
| ABCB5    | 164218  | 648 | 4   | 3287304 | 898188  | 0 | 23 | 1 | 0 | 11 | 7   | 6019248  | 5.14E-03 | 1        |
| DDX3X    | 627364  | NaN | 54  | 1747248 | 445356  | 0 | 13 | 2 | 0 | 50 | 78  | 21071996 | 5.37E-03 | 1        |
| DKN2AIP1 | 929843  | 170 | 46  | 305448  | 80100   | 0 | 4  | 0 | 0 | 50 | 67  | 23256412 | 5.39E-03 | 1        |
| ZBTB45   | 2673870 | 276 | 11  | 1217876 | 428980  | 0 | 9  | 2 | 0 | 30 | 39  | 15664000 | 5.40E-03 | 1        |
| TOR1AIP1 | 470940  | 364 | 5   | 1489148 | 420436  | 0 | 12 | 0 | 0 | 33 | 34  | 13858724 | 5.42E-03 | 1        |
| MED13    | 369807  | 275 | 3   | 5557516 | 1537208 | 0 | 32 | 5 | 0 | 50 | 54  | 24805368 | 5.68E-03 | 1        |
| CD1E     | 135429  | 902 | 5   | 1009616 | 258100  | 0 | 11 | 1 | 0 | 50 | 50  | 16503092 | 5.74E-03 | 1        |
| ATAD5    | 605762  | 209 | 25  | 4794964 | 1210400 | 0 | 28 | 2 | 0 | 2  | 3   | 2710228  | 5.76E-03 | 1        |
| RAD21    | 482614  | 426 | 18  | 1673912 | 406552  | 0 | 13 | 2 | 0 | 50 | 57  | 17804272 | 5.79E-03 | 1        |
| PPP4R1   | 454636  | 202 | 51  | 2475980 | 652192  | 0 | 11 | 2 | 0 | 50 | 47  | 19329376 | 6.04E-03 | 1        |
| TPRG1    | 131839  | 421 | 1   | 712712  | 192952  | 0 | 6  | 1 | 0 | 8  | 6   | 2928100  | 6.33E-03 | 1        |
| EPS8     | 259826  | 496 | 11  | 2157004 | 565328  | 0 | 10 | 2 | 0 | 50 | 53  | 19892568 | 6.36E-03 | 1        |
| USP28    | 169458  | 534 | 10  | 2820232 | 738344  | 0 | 12 | 2 | 0 | 50 | 69  | 25564716 | 6.43E-03 | 1        |
| CD9      | 2261351 | 277 | 32  | 610540  | 153080  | 0 | 4  | 1 | 0 | 50 | 53  | 24237548 | 6.48E-03 | 1        |

|          |         |      |     |         |         |   |    |   |   |    |     |          |          |   |
|----------|---------|------|-----|---------|---------|---|----|---|---|----|-----|----------|----------|---|
| GABRA4   | 104768  | 839  | 15  | 1414032 | 398364  | 0 | 13 | 2 | 0 | 50 | 56  | 19046712 | 6.51E-03 | 1 |
| MIPOL1   | 67481   | 526  | -48 | 1188684 | 277680  | 0 | 13 | 1 | 0 | 41 | 62  | 15976924 | 6.81E-03 | 1 |
| CD2BP2   | 2312884 | 165  | 47  | 873624  | 247776  | 0 | 8  | 2 | 0 | 16 | 12  | 6329680  | 6.83E-03 | 1 |
| NOP14    | 680459  | 336  | 49  | 2244224 | 583840  | 0 | 12 | 1 | 0 | 50 | 44  | 17555428 | 6.97E-03 | 1 |
| LETMD1   | 564607  | 155  | 40  | 928448  | 264508  | 0 | 8  | 1 | 0 | 50 | 43  | 19587832 | 7.21E-03 | 1 |
| DCAF12   | 779457  | 142  | 39  | 1153440 | 335352  | 0 | 12 | 1 | 0 | 50 | 48  | 21010052 | 7.39E-03 | 1 |
| FOSL2    | 465927  | 197  | 30  | 801356  | 259168  | 0 | 5  | 1 | 0 | 50 | 63  | 21832056 | 7.46E-03 | 1 |
| ARHGAP3  | 265987  | 585  | 23  | 3598448 | 1078324 | 0 | 17 | 1 | 0 | 48 | 44  | 23357160 | 7.51E-03 | 1 |
| HFM1     | 263616  | 615  | -10 | 3829136 | 934144  | 0 | 17 | 2 | 0 | 30 | 36  | 16546168 | 7.84E-03 | 1 |
| SUMO1    | 371912  | 192  | 41  | 284088  | 61944   | 0 | 3  | 0 | 0 | 50 | 50  | 19879040 | 8.22E-03 | 1 |
| RBM17    | 576205  | 399  | 45  | 1052336 | 282664  | 0 | 9  | 1 | 0 | 50 | 55  | 22853064 | 8.33E-03 | 1 |
| METTL12  | 2425755 | 248  | 51  | 580280  | 196156  | 0 | 7  | 0 | 0 | 50 | 68  | 20007556 | 8.56E-03 | 1 |
| AGR3     | 360434  | 376  | -15 | 457816  | 107156  | 0 | 3  | 0 | 0 | 50 | 33  | 20718844 | 8.97E-03 | 1 |
| ITGAL    | 2276763 | 142  | 57  | 3024576 | 855468  | 0 | 17 | 4 | 0 | 50 | 70  | 22297348 | 9.13E-03 | 1 |
| CARD18   | 46073   | 568  | -18 | 242792  | 58384   | 0 | 3  | 0 | 0 | 50 | 51  | 19559708 | 9.25E-03 | 1 |
| LRRC41   | 690472  | 205  | 31  | 1983632 | 661804  | 0 | 13 | 4 | 0 | 50 | 43  | 17617372 | 9.27E-03 | 1 |
| NBEA     | 38939   | 1070 | 11  | 7627300 | 2058392 | 0 | 16 | 0 | 0 | 5  | 3   | 6061256  | 9.35E-03 | 1 |
| GABARAF  | 1782958 | 316  | 21  | 312924  | 77964   | 0 | 3  | 1 | 0 | 16 | 13  | 4887168  | 9.45E-03 | 1 |
| MYO16    | 108921  | 641  | -19 | 4772536 | 1328948 | 0 | 23 | 3 | 0 | 12 | 14  | 9320436  | 9.50E-03 | 1 |
| SLC25A30 | 680643  | 296  | 78  | 763264  | 210752  | 0 | 5  | 0 | 0 | 50 | 51  | 21491720 | 9.60E-03 | 1 |
| KHDRBS2  | 1561    | 1153 | -32 | 903884  | 251692  | 0 | 10 | 0 | 0 | 34 | 70  | 13196208 | 1.01E-02 | 1 |
| LATS1    | 431427  | 210  | 40  | 2866156 | 783200  | 0 | 15 | 2 | 0 | 50 | 38  | 19087296 | 1.02E-02 | 1 |
| UFC1     | 728669  | 234  | 37  | 444644  | 114988  | 0 | 4  | 0 | 0 | 50 | 54  | 22528392 | 1.03E-02 | 1 |
| GTF2I    | 908884  | 151  | 45  | 2667152 | 678892  | 0 | 15 | 1 | 0 | 49 | 62  | 23995824 | 1.03E-02 | 1 |
| RGS21    | 123814  | 860  | -26 | 412604  | 94696   | 0 | 5  | 0 | 0 | 50 | 73  | 21356084 | 1.07E-02 | 1 |
| MAN2A1   | 181420  | 913  | 10  | 2985060 | 773232  | 0 | 14 | 0 | 0 | 12 | 4   | 5517288  | 1.07E-02 | 1 |
| VPS26B   | 270368  | 601  | 18  | 870064  | 231044  | 0 | 4  | 0 | 0 | 50 | 31  | 23855916 | 1.07E-02 | 1 |
| MAPRE1   | 550127  | 293  | 48  | 708084  | 179424  | 0 | 5  | 0 | 0 | 50 | 40  | 20120408 | 1.12E-02 | 1 |
| ZWILCH   | 530195  | 219  | 49  | 1583132 | 390532  | 0 | 7  | 1 | 0 | 50 | 48  | 19706380 | 1.12E-02 | 1 |
| CSAG1    | NaN     | NaN  | NaN | 207192  | 58740   | 0 | 3  | 0 | 0 | 50 | 116 | 39704324 | 1.15E-02 | 1 |
| GPR156   | 429121  | 146  | 19  | 2035252 | 610184  | 0 | 10 | 0 | 0 | 8  | 3   | 4501620  | 1.16E-02 | 1 |
| BEND6    | 428244  | 271  | 23  | 741192  | 181560  | 0 | 5  | 1 | 0 | 50 | 65  | 21924616 | 1.18E-02 | 1 |
| EPHA5    | 57073   | 706  | -19 | 2666084 | 732292  | 0 | 19 | 4 | 0 | 50 | 76  | 22947760 | 1.21E-02 | 1 |

|          |         |      |     |         |         |   |    |    |   |    |     |          |          |   |
|----------|---------|------|-----|---------|---------|---|----|----|---|----|-----|----------|----------|---|
| HLA-A    | 983517  | 596  | 36  | 935924  | 268780  | 0 | 5  | 1  | 0 | 50 | 55  | 18348240 | 1.23E-02 | 1 |
| OR5M10   | NaN     | NaN  | NaN | 777148  | 235316  | 0 | 9  | 0  | 0 | 50 | 116 | 39880900 | 1.24E-02 | 1 |
| JMJD1C   | 226859  | 712  | 23  | 6535448 | 1712716 | 0 | 23 | 0  | 0 | 1  | 0   | 1903176  | 1.26E-02 | 1 |
| CD101    | 765941  | 540  | 24  | 2589188 | 725884  | 0 | 20 | 0  | 0 | 1  | 1   | 1387332  | 1.29E-02 | 1 |
| SPSB2    | 2822601 | 232  | 32  | 644004  | 214668  | 0 | 6  | 0  | 0 | 50 | 62  | 20662240 | 1.30E-02 | 1 |
| ABHD12   | 608597  | 348  | -3  | 1092564 | 301176  | 0 | 6  | 1  | 0 | 50 | 54  | 19105096 | 1.31E-02 | 1 |
| THSD1    | 384523  | 370  | 28  | 2122828 | 627272  | 0 | 13 | 0  | 0 | 6  | 5   | 5444664  | 1.33E-02 | 1 |
| ARID1B   | 143122  | 621  | 27  | 5662892 | 1627276 | 0 | 19 | 4  | 0 | 37 | 30  | 16270980 | 1.34E-02 | 1 |
| MYOT     | 946917  | 396  | 47  | 1284448 | 348524  | 0 | 10 | 0  | 0 | 50 | 72  | 24090520 | 1.40E-02 | 1 |
| BUD13    | 419339  | 326  | 36  | 1587404 | 439660  | 0 | 10 | 1  | 0 | 50 | 47  | 21154588 | 1.44E-02 | 1 |
| ACTG1    | 3582152 | 268  | 26  | 949096  | 276968  | 0 | 10 | 2  | 0 | 17 | 14  | 4681756  | 1.45E-02 | 1 |
| EIF4EBP2 | 551720  | 338  | 46  | 310432  | 85796   | 0 | 3  | 0  | 0 | 50 | 51  | 22922840 | 1.49E-02 | 1 |
| KRT222   | 953708  | 269  | 13  | 776080  | 195800  | 0 | 8  | 0  | 0 | 50 | 60  | 20121832 | 1.53E-02 | 1 |
| RPL31    | 335036  | 406  | 23  | 378784  | 107156  | 0 | 3  | 0  | 0 | 50 | 36  | 21770468 | 1.56E-02 | 1 |
| CST8     | 188567  | 750  | -16 | 368816  | 97900   | 0 | 5  | 0  | 0 | 50 | 74  | 22064524 | 1.58E-02 | 1 |
| NAP1L1   | 604083  | 438  | 17  | 1083664 | 236384  | 0 | 9  | 0  | 0 | 50 | 67  | 21773672 | 1.59E-02 | 1 |
| SNRPB    | 652241  | 477  | 33  | 613744  | 197936  | 0 | 5  | 1  | 0 | 10 | 6   | 4985780  | 1.60E-02 | 1 |
| OR4N2    | 275024  | 858  | -57 | 754364  | 231400  | 0 | 10 | 2  | 0 | 27 | 46  | 10634076 | 1.61E-02 | 1 |
| C5orf45  | 1610057 | 359  | 38  | 877540  | 252404  | 0 | 5  | 1  | 0 | 50 | 48  | 18056676 | 1.63E-02 | 1 |
| CRISP3   | 67784   | 1246 | -2  | 660736  | 157352  | 0 | 6  | 0  | 0 | 50 | 36  | 19283096 | 1.64E-02 | 1 |
| WTAP     | 643775  | 604  | 19  | 1036672 | 267356  | 0 | 8  | 1  | 0 | 50 | 53  | 20025356 | 1.64E-02 | 1 |
| SEMA5B   | 504904  | 328  | 34  | 2917064 | 867928  | 0 | 17 | 4  | 0 | 50 | 48  | 19651556 | 1.73E-02 | 1 |
| MICAL2   | 319572  | 254  | 10  | 2909944 | 805628  | 0 | 16 | 1  | 0 | 13 | 8   | 6453924  | 1.74E-02 | 1 |
| APLP1    | 1060028 | 321  | 47  | 1656112 | 501248  | 0 | 12 | 2  | 0 | 50 | 67  | 19297692 | 1.85E-02 | 1 |
| POM121   | 641244  | 332  | 59  | 2391252 | 811680  | 0 | 8  | 0  | 0 | 12 | 2   | 4691012  | 1.87E-02 | 1 |
| CD79A    | 1360684 | 454  | 23  | 580992  | 163404  | 0 | 4  | 0  | 0 | 50 | 69  | 18698900 | 1.88E-02 | 1 |
| NF2      | 734742  | 149  | 38  | 1622292 | 400500  | 0 | 9  | 1  | 0 | 50 | 55  | 21913580 | 1.89E-02 | 1 |
| DTX2     | 876888  | 220  | 58  | 1562128 | 472412  | 0 | 5  | 0  | 0 | 9  | 0   | 3267368  | 1.90E-02 | 1 |
| CASP1    | 45435   | 622  | -19 | 1064440 | 273764  | 0 | 8  | 1  | 0 | 41 | 32  | 14348580 | 1.91E-02 | 1 |
| ZFHX4    | 72333   | 731  | 8   | 9103276 | 2528312 | 0 | 53 | 11 | 0 | 50 | 69  | 26998684 | 1.94E-02 | 1 |
| HCRTR2   | 27686   | 676  | -13 | 1131724 | 319688  | 0 | 7  | 1  | 0 | 37 | 51  | 19557216 | 1.95E-02 | 1 |
| SF3B3    | 905402  | 131  | 40  | 3114644 | 894628  | 0 | 18 | 2  | 0 | 34 | 40  | 16234668 | 1.98E-02 | 1 |
| HNRNPK   | 460176  | 343  | 2   | 1250272 | 338912  | 0 | 8  | 0  | 0 | 20 | 18  | 8075504  | 1.99E-02 | 1 |

|           |         |      |     |         |         |   |    |   |   |    |    |          |          |   |
|-----------|---------|------|-----|---------|---------|---|----|---|---|----|----|----------|----------|---|
| IIST1H2AI | 228884  | 634  | 40  | 312924  | 108936  | 0 | 5  | 0 | 0 | 50 | 48 | 14804260 | 2.00E-02 | 1 |
| RUNX1     | 164915  | 429  | 45  | 1238524 | 384836  | 0 | 10 | 0 | 0 | 16 | 21 | 7080840  | 2.03E-02 | 1 |
| CDC42     | 441481  | 155  | 28  | 572448  | 162336  | 0 | 5  | 0 | 0 | 50 | 69 | 23471792 | 2.04E-02 | 1 |
| DDAH1     | 309815  | 308  | 0   | 729088  | 208616  | 0 | 7  | 0 | 0 | 50 | 64 | 26465396 | 2.05E-02 | 1 |
| CSNK2A1   | 671817  | 229  | 40  | 1039520 | 263440  | 0 | 10 | 0 | 0 | 50 | 61 | 22906820 | 2.06E-02 | 1 |
| GAPT      | 125347  | 446  | 5   | 397296  | 108936  | 0 | 5  | 0 | 0 | 50 | 46 | 16544744 | 2.08E-02 | 1 |
| ACOT11    | 688014  | 415  | 18  | 1712716 | 478820  | 0 | 10 | 0 | 0 | 16 | 11 | 7164500  | 2.11E-02 | 1 |
| IDH1      | 260367  | 539  | 17  | 1090428 | 273408  | 0 | 8  | 0 | 0 | 50 | 42 | 22991904 | 2.12E-02 | 1 |
| TRPA1     | 19123   | 936  | 29  | 2968684 | 730868  | 0 | 16 | 4 | 0 | 29 | 25 | 12173064 | 2.12E-02 | 1 |
| RIPK4     | 302894  | 182  | 30  | 1932012 | 615168  | 0 | 14 | 3 | 0 | 31 | 33 | 11818488 | 2.12E-02 | 1 |
| SALL2     | 707507  | 470  | 26  | 2435040 | 798864  | 0 | 13 | 2 | 0 | 50 | 57 | 21821732 | 2.16E-02 | 1 |
| ARIH2     | 1818938 | 241  | 37  | 1338560 | 304024  | 0 | 9  | 1 | 0 | 50 | 71 | 22662604 | 2.17E-02 | 1 |
| PHLDB2    | 192496  | 160  | 4   | 3344620 | 885728  | 0 | 21 | 5 | 0 | 21 | 20 | 7718436  | 2.17E-02 | 1 |
| SLA2      | 1019481 | 176  | 62  | 695268  | 174084  | 0 | 5  | 0 | 0 | 50 | 44 | 18338984 | 2.18E-02 | 1 |
| CCDC88A   | 621554  | 341  | 27  | 4936652 | 1197940 | 0 | 27 | 4 | 0 | 18 | 13 | 6999672  | 2.22E-02 | 1 |
| C9orf41   | 95299   | 649  | -13 | 1067644 | 275900  | 0 | 8  | 0 | 0 | 50 | 48 | 22879052 | 2.23E-02 | 1 |
| EIF2B4    | 1245306 | 182  | 52  | 1395876 | 436812  | 0 | 7  | 0 | 0 | 50 | 41 | 22639464 | 2.24E-02 | 1 |
| TTYH1     | 807048  | 535  | -7  | 1203636 | 380208  | 0 | 8  | 2 | 0 | 50 | 83 | 18359276 | 2.29E-02 | 1 |
| BRE       | 536663  | 376  | 27  | 1191532 | 315416  | 0 | 7  | 1 | 0 | 38 | 31 | 12724864 | 2.29E-02 | 1 |
| RIF1      | 228411  | 589  | 19  | 6382368 | 1690644 | 0 | 21 | 1 | 0 | 12 | 3  | 4857976  | 2.38E-02 | 1 |
| ZNF385D   | 10169   | 1033 | -21 | 998224  | 300464  | 0 | 10 | 2 | 0 | 50 | 97 | 23625940 | 2.39E-02 | 1 |
| THUMPD1   | 179233  | 641  | 14  | 908512  | 238520  | 0 | 4  | 1 | 0 | 50 | 61 | 25750904 | 2.42E-02 | 1 |
| HIST1H3C  | 408919  | 685  | 43  | 330368  | 110716  | 0 | 5  | 1 | 0 | 50 | 57 | 16881520 | 2.43E-02 | 1 |
| ZNF626    | 222609  | 1011 | -67 | 1421508 | 344964  | 0 | 12 | 1 | 0 | 14 | 9  | 3927392  | 2.44E-02 | 1 |
| CFHR4     | 211450  | 853  | -31 | 871488  | 215736  | 0 | 9  | 1 | 0 | 7  | 14 | 4122124  | 2.46E-02 | 1 |
| IPO7      | 566709  | 145  | 21  | 2755440 | 676044  | 0 | 16 | 1 | 0 | 50 | 51 | 18961984 | 2.46E-02 | 1 |
| ZNF383    | 228048  | 984  | -52 | 1249560 | 294768  | 0 | 6  | 0 | 0 | 50 | 46 | 19357500 | 2.47E-02 | 1 |
| TAF7L     | 404269  | NaN  | 29  | 1248492 | 288360  | 0 | 8  | 0 | 0 | 50 | 44 | 21693216 | 2.48E-02 | 1 |
| ADH6      | 167884  | 786  | -3  | 971880  | 271272  | 0 | 7  | 0 | 0 | 50 | 33 | 21521980 | 2.49E-02 | 1 |
| HIST1H4K  | 267617  | 634  | 32  | 248844  | 86508   | 0 | 4  | 0 | 0 | 50 | 56 | 15505936 | 2.49E-02 | 1 |
| KATNA1    | 437046  | 210  | 41  | 1280888 | 336064  | 0 | 9  | 1 | 0 | 50 | 38 | 16434028 | 2.53E-02 | 1 |
| COX6A1    | 1573849 | 216  | 44  | 278036  | 85084   | 0 | 4  | 0 | 0 | 50 | 64 | 21461816 | 2.53E-02 | 1 |
| ZNF511    | 386585  | 472  | 13  | 653972  | 182272  | 0 | 6  | 0 | 0 | 50 | 46 | 19712788 | 2.54E-02 | 1 |

|          |         |      |     |         |         |   |    |   |   |    |    |          |          |   |
|----------|---------|------|-----|---------|---------|---|----|---|---|----|----|----------|----------|---|
| CNST     | 416573  | 346  | 4   | 1884664 | 498044  | 0 | 12 | 2 | 0 | 50 | 44 | 19481744 | 2.58E-02 | 1 |
| NKG7     | 368509  | 610  | -9  | 415096  | 129584  | 0 | 6  | 2 | 0 | 5  | 5  | 1191888  | 2.58E-02 | 1 |
| BRWD1    | 383347  | 235  | 30  | 6273076 | 1606628 | 0 | 18 | 1 | 0 | 13 | 9  | 9850876  | 2.59E-02 | 1 |
| KCTD21   | 551110  | 208  | 23  | 654328  | 186188  | 0 | 6  | 0 | 0 | 50 | 61 | 23537296 | 2.59E-02 | 1 |
| SMARCA2  | 113887  | 805  | 18  | 4149180 | 1089360 | 0 | 22 | 0 | 0 | 1  | 0  | 1488792  | 2.60E-02 | 1 |
| RBL2     | 237885  | 403  | -2  | 2956936 | 785336  | 0 | 11 | 2 | 0 | 50 | 43 | 22041740 | 2.60E-02 | 1 |
| CRABP1   | 505232  | 435  | 56  | 360984  | 93984   | 0 | 3  | 0 | 0 | 50 | 72 | 22705324 | 2.61E-02 | 1 |
| DEPDC5   | 557139  | 336  | 19  | 4202224 | 1106804 | 0 | 15 | 2 | 0 | 25 | 25 | 10969784 | 2.62E-02 | 1 |
| MEM200A  | 126083  | 954  | 23  | 1226420 | 354220  | 0 | 10 | 2 | 0 | 50 | 47 | 21686452 | 2.63E-02 | 1 |
| ARL8B    | 263029  | 325  | 22  | 499824  | 124956  | 0 | 3  | 0 | 0 | 50 | 50 | 21875844 | 2.65E-02 | 1 |
| ZNF529   | 644122  | 889  | -48 | 1483808 | 340336  | 0 | 12 | 1 | 0 | 50 | 67 | 17940620 | 2.66E-02 | 1 |
| OR10R2   | 177013  | 929  | 7   | 820580  | 254896  | 0 | 7  | 2 | 0 | 15 | 9  | 5331812  | 2.67E-02 | 1 |
| RXRG     | 291474  | 623  | -10 | 1232828 | 351016  | 0 | 7  | 0 | 0 | 20 | 12 | 8966572  | 2.69E-02 | 1 |
| SOX2     | 39313   | 1104 | -14 | 787116  | 231756  | 0 | 6  | 0 | 0 | 50 | 87 | 28734896 | 2.70E-02 | 1 |
| RPS13    | 511749  | 436  | 14  | 399432  | 113208  | 0 | 3  | 0 | 0 | 50 | 59 | 20773668 | 2.70E-02 | 1 |
| FAM19A4  | 263741  | 842  | -15 | 374156  | 94696   | 0 | 5  | 0 | 0 | 50 | 70 | 20173808 | 2.71E-02 | 1 |
| PPP2R5D  | 1200368 | 259  | 40  | 1581708 | 416520  | 0 | 10 | 3 | 0 | 50 | 74 | 22706748 | 2.72E-02 | 1 |
| PDSS1    | 339802  | 540  | 18  | 1082240 | 299752  | 0 | 8  | 0 | 0 | 50 | 53 | 26041400 | 2.75E-02 | 1 |
| ZNF800   | 313691  | 807  | -5  | 1702392 | 450696  | 0 | 13 | 0 | 0 | 27 | 30 | 12943804 | 2.82E-02 | 1 |
| PAPD4    | 260678  | 684  | 28  | 1287652 | 326096  | 0 | 4  | 1 | 0 | 50 | 43 | 20299120 | 2.82E-02 | 1 |
| CYP46A1  | 375738  | 250  | 21  | 1287296 | 377716  | 0 | 8  | 0 | 0 | 19 | 20 | 9925636  | 2.84E-02 | 1 |
| DCLK2    | 88181   | 409  | -4  | 1956220 | 567464  | 0 | 11 | 2 | 0 | 50 | 51 | 21157792 | 2.85E-02 | 1 |
| TNPO1    | 469585  | 388  | 30  | 2386980 | 595944  | 0 | 11 | 1 | 0 | 13 | 15 | 5940928  | 2.85E-02 | 1 |
| RAB13    | 2028800 | 222  | 34  | 548240  | 137416  | 0 | 3  | 0 | 0 | 50 | 66 | 18282736 | 2.86E-02 | 1 |
| SLC25A27 | 141781  | 596  | 1   | 838736  | 233536  | 0 | 6  | 0 | 0 | 50 | 44 | 20688228 | 2.89E-02 | 1 |
| TP53BP2  | 609494  | 361  | 4   | 2914572 | 794592  | 0 | 14 | 4 | 0 | 50 | 51 | 20773312 | 2.91E-02 | 1 |
| C4orf22  | 46363   | 1141 | -4  | 610540  | 162692  | 0 | 4  | 0 | 0 | 50 | 61 | 21150316 | 2.94E-02 | 1 |
| DENND5B  | 300830  | 361  | 17  | 3290508 | 880032  | 0 | 16 | 2 | 0 | 5  | 6  | 3379152  | 2.95E-02 | 1 |
| ARRDC3   | 51436   | 334  | 5   | 1070848 | 288716  | 0 | 6  | 0 | 0 | 50 | 38 | 19461096 | 2.99E-02 | 1 |
| TNFAIP6  | 216177  | 589  | 24  | 735496  | 178712  | 0 | 7  | 0 | 0 | 50 | 53 | 23028216 | 3.01E-02 | 1 |
| PBOV1    | 341233  | 545  | 21  | 345320  | 92560   | 0 | 4  | 0 | 0 | 35 | 48 | 15242496 | 3.01E-02 | 1 |
| FADD     | 765202  | 286  | 34  | 509792  | 164116  | 0 | 5  | 1 | 0 | 50 | 82 | 26425880 | 3.02E-02 | 1 |
| C9orf153 | 311398  | 417  | 8   | 273764  | 67996   | 0 | 3  | 0 | 0 | 50 | 58 | 21260676 | 3.05E-02 | 1 |

|           |         |      |     |         |         |   |    |   |   |    |    |          |          |   |
|-----------|---------|------|-----|---------|---------|---|----|---|---|----|----|----------|----------|---|
| SESN3     | 349302  | 468  | 13  | 1283380 | 334640  | 0 | 11 | 1 | 0 | 50 | 40 | 18832400 | 3.08E-02 | 1 |
| RSPO2     | 187803  | 942  | -9  | 650412  | 148452  | 0 | 5  | 0 | 0 | 50 | 45 | 20618808 | 3.10E-02 | 1 |
| ZNF513    | 1244404 | 179  | 39  | 1326100 | 423284  | 0 | 9  | 1 | 0 | 29 | 38 | 12368864 | 3.13E-02 | 1 |
| THRAP3    | 742773  | 170  | 31  | 2424004 | 681740  | 0 | 12 | 1 | 0 | 14 | 14 | 6586000  | 3.15E-02 | 1 |
| DCAF4L2   | 26672   | 994  | -27 | 969388  | 301532  | 0 | 10 | 0 | 0 | 7  | 5  | 1813820  | 3.17E-02 | 1 |
| PIK3CG    | 171312  | 700  | 32  | 2807772 | 768960  | 0 | 14 | 3 | 0 | 50 | 53 | 20751240 | 3.18E-02 | 1 |
| LYG2      | 473611  | 633  | 32  | 559632  | 144180  | 0 | 5  | 0 | 0 | 50 | 70 | 26140724 | 3.18E-02 | 1 |
| CSRNP3    | 104412  | 947  | 2   | 1491284 | 403348  | 0 | 7  | 0 | 0 | 19 | 5  | 6188348  | 3.19E-02 | 1 |
| PLEKHA8   | 659459  | 466  | 26  | 1177648 | 288716  | 0 | 6  | 0 | 0 | 50 | 61 | 22901836 | 3.19E-02 | 1 |
| CUL1      | 517446  | 532  | 0   | 2069428 | 505520  | 0 | 16 | 2 | 0 | 50 | 78 | 22507032 | 3.22E-02 | 1 |
| S100BPB   | 1179496 | 180  | 20  | 1057676 | 285868  | 0 | 7  | 2 | 0 | 13 | 12 | 4292292  | 3.25E-02 | 1 |
| AQP6      | 1033911 | 220  | 48  | 679604  | 239944  | 0 | 5  | 0 | 0 | 50 | 62 | 21015036 | 3.32E-02 | 1 |
| ANXA1     | 247950  | 411  | -15 | 924888  | 238164  | 0 | 6  | 0 | 0 | 50 | 31 | 18382416 | 3.33E-02 | 1 |
| UBL4A     | 2163759 | NaN  | 42  | 397652  | 123532  | 0 | 6  | 0 | 0 | 50 | 72 | 22102972 | 3.36E-02 | 1 |
| APOA2     | 728669  | 234  | 37  | 263440  | 72980   | 0 | 3  | 0 | 0 | 39 | 44 | 15898604 | 3.36E-02 | 1 |
| TMEM169   | 603452  | 419  | 35  | 746532  | 212532  | 0 | 5  | 0 | 0 | 50 | 58 | 22205500 | 3.36E-02 | 1 |
| CYC1      | 2720766 | 211  | 27  | 813104  | 259168  | 0 | 7  | 1 | 0 | 31 | 38 | 13524084 | 3.41E-02 | 1 |
| FAM177A1  | 640994  | 321  | 45  | 619084  | 159488  | 0 | 4  | 0 | 0 | 50 | 49 | 19980500 | 3.47E-02 | 1 |
| USP7      | 401069  | 159  | 12  | 2978652 | 683520  | 0 | 15 | 1 | 0 | 12 | 7  | 4959436  | 3.48E-02 | 1 |
| PIK3R1    | 48999   | 619  | 32  | 2020656 | 500892  | 0 | 6  | 1 | 0 | 50 | 30 | 20178080 | 3.48E-02 | 1 |
| TRDMT1    | 558326  | 451  | 5   | 1031688 | 269136  | 0 | 8  | 1 | 0 | 15 | 20 | 7732676  | 3.51E-02 | 1 |
| CDH17     | 474043  | 543  | 18  | 2153800 | 587756  | 0 | 12 | 3 | 0 | 50 | 64 | 21600300 | 3.53E-02 | 1 |
| DDX52     | 585337  | 340  | 23  | 1572096 | 412248  | 0 | 8  | 2 | 0 | 50 | 41 | 21676484 | 3.53E-02 | 1 |
| CPA2      | 424934  | 212  | 30  | 1099684 | 292988  | 0 | 7  | 2 | 0 | 25 | 25 | 7341076  | 3.54E-02 | 1 |
| IKZF2     | 55860   | 1226 | 19  | 1386264 | 332148  | 0 | 11 | 2 | 0 | 50 | 51 | 19102960 | 3.58E-02 | 1 |
| SNAP29    | 470051  | 216  | 39  | 667144  | 179780  | 0 | 5  | 0 | 0 | 50 | 35 | 16767244 | 3.60E-02 | 1 |
| POLA2     | 3946871 | 242  | 49  | 1551092 | 440728  | 0 | 11 | 1 | 0 | 27 | 30 | 12483852 | 3.66E-02 | 1 |
| ATAD2     | 544857  | 225  | 30  | 3628352 | 943756  | 0 | 24 | 1 | 0 | 27 | 31 | 10924572 | 3.68E-02 | 1 |
| SMCHD1    | 502296  | 394  | 33  | 5273072 | 1354936 | 0 | 19 | 2 | 0 | 14 | 11 | 7646880  | 3.69E-02 | 1 |
| FUS       | 1250318 | 351  | 26  | 1378432 | 369884  | 0 | 6  | 0 | 0 | 12 | 11 | 4995036  | 3.69E-02 | 1 |
| HIST2H2BI | 798975  | 560  | 17  | 312568  | 96476   | 0 | 6  | 1 | 0 | 21 | 23 | 6253852  | 3.70E-02 | 1 |
| HGS       | 3745109 | 205  | 30  | 2027064 | 557496  | 0 | 10 | 1 | 0 | 33 | 25 | 10695308 | 3.72E-02 | 1 |
| TMEM105   | 2765068 | 191  | 24  | 317196  | 107868  | 0 | 3  | 0 | 0 | 50 | 55 | 23441888 | 3.72E-02 | 1 |



|          |         |      |     |         |         |   |    |   |   |    |     |          |          |   |
|----------|---------|------|-----|---------|---------|---|----|---|---|----|-----|----------|----------|---|
| FBN2     | 226750  | 605  | 9   | 7719860 | 1886800 | 0 | 29 | 3 | 0 | 10 | 10  | 6342852  | 3.73E-02 | 1 |
| MEA1     | 1200368 | 259  | 40  | 475616  | 135280  | 0 | 4  | 0 | 0 | 50 | 74  | 22706748 | 3.75E-02 | 1 |
| TIMM17A  | 751933  | 168  | 31  | 447492  | 127092  | 0 | 3  | 0 | 0 | 50 | 42  | 20179148 | 3.79E-02 | 1 |
| OR4A47   | 99957   | 835  | -45 | 768248  | 222856  | 0 | 6  | 0 | 0 | 18 | 13  | 5248508  | 3.80E-02 | 1 |
| EIF5A    | 1911735 | 206  | 36  | 485584  | 130652  | 0 | 5  | 0 | 0 | 50 | 69  | 22072000 | 3.81E-02 | 1 |
| RANBP3L  | 213853  | 402  | 5   | 1308300 | 324672  | 0 | 6  | 0 | 0 | 50 | 33  | 19018588 | 3.83E-02 | 1 |
| ZNF710   | 848910  | 192  | 40  | 1681032 | 466716  | 0 | 9  | 2 | 0 | 50 | 48  | 18274548 | 3.86E-02 | 1 |
| MYO1B    | 480504  | 416  | 4   | 3016388 | 754720  | 0 | 12 | 0 | 0 | 14 | 7   | 5458192  | 3.88E-02 | 1 |
| GYPA     | 131210  | 1033 | -8  | 401212  | 108224  | 0 | 3  | 0 | 0 | 50 | 46  | 20182708 | 3.88E-02 | 1 |
| TNRC6C   | 620383  | 217  | 26  | 4337860 | 1281956 | 0 | 12 | 0 | 0 | 2  | 2   | 5069440  | 3.89E-02 | 1 |
| MAP4K3   | 363056  | 435  | 10  | 2423292 | 587400  | 0 | 11 | 3 | 0 | 50 | 61  | 21055620 | 3.90E-02 | 1 |
| OR2AK2   | NaN     | NaN  | NaN | 819868  | 255608  | 0 | 6  | 0 | 0 | 50 | 116 | 39901192 | 3.91E-02 | 1 |
| AIMP2    | NaN     | NaN  | NaN | 807408  | 233892  | 0 | 6  | 0 | 0 | 50 | 116 | 39879476 | 3.92E-02 | 1 |
| ZNF471   | 135553  | 817  | -69 | 1649704 | 376292  | 0 | 10 | 0 | 0 | 14 | 16  | 7903912  | 3.92E-02 | 1 |
| RAB42    | 816470  | 183  | 25  | 260948  | 78676   | 0 | 2  | 1 | 0 | 9  | 1   | 1974732  | 3.97E-02 | 1 |
| SLC32A1  | 450934  | 551  | 36  | 1285160 | 404416  | 0 | 11 | 4 | 0 | 34 | 43  | 13522660 | 3.99E-02 | 1 |
| CLIC5    | 62331   | 701  | 13  | 1112500 | 295124  | 0 | 7  | 1 | 0 | 50 | 51  | 20593532 | 3.99E-02 | 1 |
| SH2D1B   | 363646  | 391  | 1   | 350660  | 88288   | 0 | 3  | 0 | 0 | 50 | 54  | 19589612 | 4.01E-02 | 1 |
| C4orf51  | 221010  | 1168 | 26  | 533644  | 138128  | 0 | 4  | 0 | 0 | 50 | 39  | 20567900 | 4.01E-02 | 1 |
| CWC27    | 132018  | 601  | 8   | 1270920 | 300108  | 0 | 7  | 1 | 0 | 50 | 53  | 20634116 | 4.02E-02 | 1 |
| HIST1H4E | 390169  | 544  | 57  | 248132  | 87220   | 0 | 4  | 0 | 0 | 50 | 61  | 13862640 | 4.02E-02 | 1 |
| RGS18    | 96080   | 925  | -20 | 624424  | 148808  | 0 | 5  | 0 | 0 | 50 | 70  | 20639100 | 4.02E-02 | 1 |
| DCK      | 267678  | 690  | 22  | 698828  | 163048  | 0 | 5  | 1 | 0 | 19 | 19  | 7655780  | 4.04E-02 | 1 |
| UPF2     | 353958  | 125  | 28  | 3358148 | 810256  | 0 | 15 | 1 | 0 | 34 | 30  | 17005052 | 4.05E-02 | 1 |
| APOC1    | 1003719 | 196  | 6   | 221788  | 60164   | 0 | 2  | 0 | 0 | 50 | 42  | 17116124 | 4.08E-02 | 1 |
| SETD2    | 593886  | 365  | 46  | 6529396 | 1776440 | 0 | 25 | 1 | 0 | 2  | 2   | 2358144  | 4.10E-02 | 1 |
| RPA3     | 218130  | 434  | 16  | 325384  | 80456   | 0 | 3  | 0 | 0 | 50 | 58  | 20587124 | 4.10E-02 | 1 |
| CD1D     | 120333  | 711  | 8   | 852620  | 245284  | 0 | 11 | 2 | 0 | 12 | 22  | 6894652  | 4.14E-02 | 1 |
| TLR3     | 355117  | 414  | -13 | 2296200 | 620508  | 0 | 10 | 1 | 0 | 50 | 40  | 21026072 | 4.17E-02 | 1 |
| MSH2     | 793002  | 406  | 28  | 2430768 | 631188  | 0 | 11 | 3 | 0 | 50 | 65  | 26426592 | 4.17E-02 | 1 |
| GPC2     | 1299015 | 205  | 52  | 1413320 | 483448  | 0 | 6  | 0 | 0 | 31 | 25  | 11569644 | 4.20E-02 | 1 |
| GNRH1    | 178665  | 515  | 21  | 242080  | 67640   | 0 | 2  | 0 | 0 | 50 | 47  | 20796808 | 4.24E-02 | 1 |
| TFPI2    | 228127  | 480  | -12 | 616592  | 158776  | 0 | 6  | 0 | 0 | 50 | 63  | 21073420 | 4.25E-02 | 1 |

|         |         |      |     |         |         |   |    |   |   |    |     |          |          |   |
|---------|---------|------|-----|---------|---------|---|----|---|---|----|-----|----------|----------|---|
| SLC24A1 | 501873  | 240  | 44  | 1216452 | 321468  | 0 | 6  | 1 | 0 | 45 | 40  | 18830264 | 4.27E-02 | 1 |
| RIMKLB  | 302894  | 262  | 17  | 978644  | 282664  | 0 | 5  | 0 | 0 | 32 | 33  | 15036728 | 4.28E-02 | 1 |
| ACSM2B  | 166410  | 726  | -6  | 1492352 | 415096  | 0 | 7  | 1 | 0 | 35 | 30  | 15301236 | 4.31E-02 | 1 |
| PCDH11X | 123263  | NaN  | -21 | 3461744 | 1013176 | 0 | 15 | 1 | 0 | 8  | 7   | 4312584  | 4.34E-02 | 1 |
| NEK10   | 107333  | 515  | -15 | 1911008 | 471700  | 0 | 13 | 1 | 0 | 15 | 19  | 8062688  | 4.34E-02 | 1 |
| PYGO1   | 306625  | 405  | -9  | 1056252 | 297972  | 0 | 5  | 0 | 0 | 21 | 14  | 10290892 | 4.37E-02 | 1 |
| PCF11   | 308252  | 305  | 10  | 3947328 | 1102176 | 0 | 15 | 2 | 0 | 17 | 9   | 6498424  | 4.38E-02 | 1 |
| MORC1   | 88595   | 1029 | -12 | 2639028 | 634392  | 0 | 17 | 1 | 0 | 41 | 52  | 19260312 | 4.39E-02 | 1 |
| C8orf37 | 313002  | 375  | 45  | 555716  | 134212  | 0 | 4  | 0 | 0 | 50 | 56  | 18502388 | 4.39E-02 | 1 |
| PROS1   | 79315   | 1341 | -10 | 1771456 | 457460  | 0 | 12 | 0 | 0 | 50 | 58  | 24269232 | 4.40E-02 | 1 |
| DDX4    | 331341  | 486  | 34  | 1953372 | 503028  | 0 | 9  | 1 | 0 | 50 | 43  | 18082308 | 4.41E-02 | 1 |
| SND1    | 566402  | 650  | 22  | 2347464 | 669636  | 0 | 10 | 1 | 0 | 50 | 56  | 19265652 | 4.43E-02 | 1 |
| EXOC1   | 579538  | 452  | 12  | 2361348 | 583128  | 0 | 9  | 0 | 0 | 8  | 1   | 2643300  | 4.47E-02 | 1 |
| MS4A2   | 336373  | 691  | 4   | 675332  | 189748  | 0 | 5  | 0 | 0 | 30 | 49  | 15492408 | 4.48E-02 | 1 |
| LIPH    | 953031  | 366  | 31  | 1179784 | 306872  | 0 | 5  | 1 | 0 | 50 | 52  | 20219732 | 4.51E-02 | 1 |
| CPD     | 491081  | 265  | 22  | 3522620 | 989680  | 0 | 21 | 4 | 0 | 50 | 60  | 19058460 | 4.52E-02 | 1 |
| KLF6    | 129035  | 476  | 2   | 734428  | 188324  | 0 | 6  | 1 | 0 | 31 | 21  | 8867248  | 4.55E-02 | 1 |
| UQCR10  | 848649  | 195  | 37  | 201140  | 54112   | 0 | 2  | 0 | 0 | 50 | 54  | 19150308 | 4.55E-02 | 1 |
| RNF216  | 1965381 | 220  | 47  | 2420088 | 608760  | 0 | 16 | 3 | 0 | 50 | 57  | 20102252 | 4.55E-02 | 1 |
| ARPC2   | 724341  | 197  | 30  | 808832  | 200428  | 0 | 5  | 0 | 0 | 50 | 32  | 18184480 | 4.56E-02 | 1 |
| RNF111  | 591201  | 230  | 31  | 2512292 | 705592  | 0 | 12 | 0 | 0 | 7  | 4   | 2675340  | 4.58E-02 | 1 |
| FPGT    | NaN     | NaN  | NaN | 1516560 | 409044  | 0 | 9  | 2 | 0 | 50 | 118 | 40054628 | 4.58E-02 | 1 |
| KIF21A  | 76823   | 675  | -19 | 4381648 | 1143116 | 0 | 20 | 3 | 0 | 6  | 7   | 3931308  | 4.59E-02 | 1 |
| TXNDC15 | 727517  | 696  | 49  | 909224  | 264508  | 0 | 4  | 0 | 0 | 44 | 37  | 19698904 | 4.61E-02 | 1 |
| H2AFX   | 1390854 | 195  | 58  | 337488  | 126024  | 0 | 3  | 0 | 0 | 50 | 44  | 17195156 | 4.63E-02 | 1 |
| RTP3    | 289420  | 565  | 32  | 600928  | 154148  | 0 | 3  | 0 | 0 | 50 | 68  | 24259976 | 4.63E-02 | 1 |
| COPS2   | 317456  | 528  | 8   | 1221080 | 277324  | 0 | 8  | 0 | 0 | 50 | 56  | 21579652 | 4.63E-02 | 1 |
| TRA2B   | 978158  | 213  | 30  | 744752  | 215380  | 0 | 7  | 0 | 0 | 50 | 59  | 19409120 | 4.64E-02 | 1 |
| AMY2A   | 27205   | 1015 | -20 | 1340696 | 342472  | 0 | 8  | 0 | 0 | 9  | 6   | 3662884  | 4.65E-02 | 1 |
| CDK15   | 391799  | 588  | 32  | 1015668 | 273408  | 0 | 7  | 2 | 0 | 19 | 20  | 10323288 | 4.66E-02 | 1 |
| IFT88   | 399247  | 434  | 27  | 2244224 | 538984  | 0 | 8  | 1 | 0 | 36 | 31  | 16798572 | 4.66E-02 | 1 |
| NRSN2   | 879317  | 185  | 41  | 505876  | 159488  | 0 | 3  | 0 | 0 | 50 | 64  | 20950244 | 4.67E-02 | 1 |
| AKAP6   | 127586  | 715  | -10 | 5896428 | 1592388 | 0 | 27 | 3 | 0 | 50 | 70  | 29267828 | 4.68E-02 | 1 |

|          |         |      |     |         |         |   |    |   |   |    |     |          |          |   |
|----------|---------|------|-----|---------|---------|---|----|---|---|----|-----|----------|----------|---|
| AKR1E2   | 287187  | 559  | -13 | 851196  | 215736  | 0 | 6  | 0 | 0 | 50 | 54  | 17280596 | 4.68E-02 | 1 |
| NKTR     | 350455  | 445  | 42  | 3775736 | 980068  | 0 | 21 | 0 | 0 | 1  | 0   | 1032044  | 4.69E-02 | 1 |
| CACNA2D  | 58044   | 982  | 4   | 2945544 | 715560  | 0 | 18 | 2 | 0 | 50 | 58  | 24710672 | 4.70E-02 | 1 |
| FCRL4    | 232460  | 820  | 28  | 1321472 | 378784  | 0 | 10 | 1 | 0 | 50 | 67  | 23680408 | 4.71E-02 | 1 |
| RBP2     | 232582  | 754  | 21  | 363476  | 84016   | 0 | 5  | 0 | 0 | 50 | 63  | 21978372 | 4.71E-02 | 1 |
| PHF6     | 271272  | NaN  | 47  | 1072628 | 252760  | 0 | 7  | 0 | 0 | 50 | 67  | 21999376 | 4.72E-02 | 1 |
| ZMPSTE24 | 627703  | 373  | 18  | 1237456 | 326096  | 0 | 9  | 1 | 0 | 50 | 58  | 21496704 | 4.73E-02 | 1 |
| NMRAL1   | 751633  | 160  | 39  | 761128  | 223568  | 0 | 5  | 1 | 0 | 50 | 50  | 17444712 | 4.75E-02 | 1 |
| PDE11A   | 320610  | 618  | 18  | 2566048 | 689216  | 0 | 16 | 2 | 0 | 36 | 39  | 16101168 | 4.77E-02 | 1 |
| RC3H1    | 445943  | 353  | 13  | 2876480 | 835888  | 0 | 20 | 3 | 0 | 12 | 16  | 6946628  | 4.80E-02 | 1 |
| C11orf88 | 401074  | 326  | 18  | 525100  | 131720  | 0 | 3  | 0 | 0 | 50 | 56  | 20209764 | 4.82E-02 | 1 |
| FOXE1    | 468629  | 276  | 38  | 878608  | 319688  | 0 | 6  | 0 | 0 | 50 | 57  | 19671848 | 4.83E-02 | 1 |
| SPTBN5   | 874211  | 259  | 40  | 9177680 | 2766832 | 0 | 16 | 2 | 0 | 4  | 3   | 5106108  | 4.83E-02 | 1 |
| SLC27A5  | 2673870 | 276  | 11  | 1689576 | 562836  | 0 | 8  | 2 | 0 | 50 | 60  | 24216900 | 4.85E-02 | 1 |
| ZNF620   | 195638  | 546  | 22  | 1100396 | 271984  | 0 | 8  | 1 | 0 | 50 | 48  | 20952736 | 4.86E-02 | 1 |
| ARID4A   | 290710  | 552  | 36  | 3332160 | 796728  | 0 | 17 | 1 | 0 | 24 | 14  | 8645104  | 4.89E-02 | 1 |
| CLVS2    | 138384  | 1106 | -26 | 839448  | 228552  | 0 | 8  | 1 | 0 | 50 | 123 | 28645184 | 4.92E-02 | 1 |
| ELAVL3   | 1255985 | 265  | 32  | 932008  | 272696  | 0 | 6  | 2 | 0 | 50 | 60  | 18512000 | 4.93E-02 | 1 |
| EIF1     | 1617880 | 323  | 9   | 302244  | 75828   | 0 | 2  | 1 | 0 | 7  | 5   | 2311152  | 4.93E-02 | 1 |
| KIAA1841 | 631979  | 302  | 30  | 2012468 | 485584  | 0 | 8  | 0 | 0 | 36 | 41  | 16855888 | 4.95E-02 | 1 |
| GLIPR1L2 | 313411  | 606  | -22 | 656820  | 171948  | 0 | 6  | 0 | 0 | 6  | 5   | 2737284  | 4.96E-02 | 1 |
| EXOC3    | 787542  | 399  | 37  | 1919552 | 521896  | 0 | 7  | 3 | 0 | 50 | 58  | 23058832 | 4.98E-02 | 1 |
| YME1L1   | 389022  | 551  | 30  | 2022080 | 538984  | 0 | 9  | 0 | 0 | 2  | 0   | 1180140  | 4.98E-02 | 1 |
| OR4A16   | 1067    | 1102 | -42 | 814884  | 237096  | 0 | 8  | 0 | 0 | 10 | 13  | 5818464  | 5.00E-02 | 1 |
| NPAS4    | 1963418 | 182  | 55  | 1985412 | 617304  | 0 | 13 | 1 | 0 | 44 | 48  | 19173092 | 5.00E-02 | 1 |
| PICALM   | 366028  | 313  | 11  | 1737636 | 465648  | 0 | 7  | 0 | 0 | 18 | 15  | 9425812  | 5.01E-02 | 1 |
| NALCN    | 47011   | 804  | 5   | 4560360 | 1195092 | 0 | 19 | 1 | 0 | 13 | 11  | 7466744  | 5.02E-02 | 1 |
| ITGA4    | 233378  | 518  | 20  | 2723044 | 702032  | 0 | 15 | 0 | 0 | 12 | 13  | 5814192  | 5.07E-02 | 1 |
| GNA13    | 811904  | 401  | 12  | 961912  | 262016  | 0 | 11 | 0 | 0 | 16 | 22  | 5799596  | 5.10E-02 | 1 |
| HMG20A   | 341694  | 645  | 30  | 920972  | 232468  | 0 | 4  | 1 | 0 | 17 | 23  | 9342864  | 5.13E-02 | 1 |
| CAPN3    | 592239  | 284  | 38  | 2240308 | 549308  | 0 | 10 | 2 | 0 | 29 | 33  | 10407304 | 5.13E-02 | 1 |
| ITCH     | 996942  | 155  | 37  | 2289080 | 574228  | 0 | 10 | 1 | 0 | 46 | 69  | 23745200 | 5.14E-02 | 1 |
| CREB3L2  | 227556  | 553  | 20  | 1326456 | 389820  | 0 | 6  | 0 | 0 | 50 | 35  | 17889356 | 5.14E-02 | 1 |

|          |         |      |     |         |         |   |    |   |   |    |     |          |          |   |
|----------|---------|------|-----|---------|---------|---|----|---|---|----|-----|----------|----------|---|
| SPO11    | 181292  | 604  | 9   | 1054828 | 270560  | 0 | 6  | 0 | 0 | 14 | 10  | 8165928  | 5.14E-02 | 1 |
| MTHFD2   | 1026994 | 272  | 50  | 897120  | 259524  | 0 | 5  | 2 | 0 | 50 | 51  | 18634108 | 5.15E-02 | 1 |
| CCKBR    | 466636  | 728  | 4   | 1071560 | 380920  | 0 | 8  | 1 | 0 | 50 | 57  | 22924620 | 5.15E-02 | 1 |
| ICAM5    | 1802015 | 191  | 21  | 2226068 | 782488  | 0 | 9  | 0 | 0 | 3  | 1   | 1995024  | 5.15E-02 | 1 |
| TTLL3    | 953772  | 264  | 43  | 1959780 | 568176  | 0 | 7  | 0 | 0 | 8  | 2   | 3292644  | 5.15E-02 | 1 |
| PLA2G2E  | 437659  | 348  | 22  | 372732  | 100392  | 0 | 4  | 0 | 0 | 50 | 42  | 18701748 | 5.16E-02 | 1 |
| FAM134B  | 203311  | 553  | -11 | 1311860 | 359560  | 0 | 6  | 0 | 0 | 14 | 21  | 7376320  | 5.16E-02 | 1 |
| ZNF585A  | 268806  | 1018 | -60 | 1849776 | 453900  | 0 | 7  | 1 | 0 | 41 | 33  | 13166660 | 5.18E-02 | 1 |
| DUSP6    | 236331  | 448  | -23 | 953012  | 279460  | 0 | 5  | 1 | 0 | 50 | 106 | 30544088 | 5.20E-02 | 1 |
| COL4A4   | 248623  | 465  | 5   | 4238180 | 1379500 | 0 | 15 | 4 | 0 | 12 | 13  | 6803160  | 5.22E-02 | 1 |
| ZC3HC1   | 473377  | 146  | 38  | 1283380 | 368816  | 0 | 9  | 1 | 0 | 50 | 51  | 17580348 | 5.23E-02 | 1 |
| F11      | 364737  | 606  | -12 | 1641516 | 422928  | 0 | 8  | 0 | 0 | 12 | 2   | 3737644  | 5.24E-02 | 1 |
| HIST1H3B | 408919  | 685  | 43  | 331080  | 110004  | 0 | 11 | 2 | 0 | 9  | 9   | 1289432  | 5.24E-02 | 1 |
| ATG4C    | 220392  | 415  | 5   | 1214316 | 299040  | 0 | 6  | 1 | 0 | 50 | 34  | 17931008 | 5.24E-02 | 1 |
| C3orf62  | 1661046 | 201  | 34  | 687080  | 180136  | 0 | 5  | 0 | 0 | 27 | 36  | 12583176 | 5.31E-02 | 1 |
| NPS      | 470657  | 703  | -30 | 235672  | 65504   | 0 | 3  | 0 | 0 | 50 | 60  | 18654756 | 5.31E-02 | 1 |
| KHDC1    | 742452  | 565  | 13  | 425064  | 116412  | 0 | 4  | 1 | 0 | 4  | 5   | 1331084  | 5.33E-02 | 1 |
| SPHK2    | 1597109 | 242  | 31  | 1544328 | 575652  | 0 | 10 | 2 | 0 | 50 | 57  | 20781500 | 5.33E-02 | 1 |
| EYA4     | 97438   | 409  | -8  | 1775016 | 468852  | 0 | 9  | 2 | 0 | 50 | 47  | 20565764 | 5.36E-02 | 1 |
| MEOX2    | 25585   | 1039 | -17 | 770740  | 215024  | 0 | 5  | 1 | 0 | 50 | 72  | 22740212 | 5.37E-02 | 1 |
| PAPOLA   | 328369  | 576  | 19  | 1956932 | 522964  | 0 | 9  | 0 | 0 | 16 | 10  | 10287332 | 5.39E-02 | 1 |
| WDHD1    | 752481  | 255  | 35  | 2968684 | 758636  | 0 | 13 | 0 | 0 | 1  | 0   | 1163764  | 5.40E-02 | 1 |
| ELAVL4   | 93599   | 824  | -20 | 1067288 | 282664  | 0 | 8  | 2 | 0 | 50 | 66  | 19429768 | 5.41E-02 | 1 |
| GLYR1    | 706891  | 195  | 33  | 1447496 | 393736  | 0 | 6  | 1 | 0 | 50 | 50  | 19489932 | 5.44E-02 | 1 |
| CRADD    | 375586  | 385  | 13  | 497688  | 151656  | 0 | 3  | 0 | 0 | 50 | 75  | 24566136 | 5.45E-02 | 1 |
| SLC2A2   | 167361  | 735  | 18  | 1337492 | 387328  | 0 | 8  | 2 | 0 | 50 | 50  | 21212260 | 5.45E-02 | 1 |
| RBM8A    | 706346  | 230  | 49  | 467784  | 116412  | 0 | 3  | 0 | 0 | 50 | 50  | 21640884 | 5.46E-02 | 1 |
| NDUFA8   | 220092  | 528  | 30  | 449984  | 117124  | 0 | 4  | 0 | 0 | 50 | 54  | 20193388 | 5.47E-02 | 1 |
| PDCL     | 433740  | 487  | 10  | 787472  | 192952  | 0 | 4  | 0 | 0 | 50 | 48  | 19317628 | 5.48E-02 | 1 |
| CACNG3   | 360425  | 348  | 8   | 797796  | 227484  | 0 | 5  | 1 | 0 | 50 | 41  | 20918560 | 5.50E-02 | 1 |
| IFI16    | 97615   | 866  | 7   | 1891428 | 490212  | 0 | 12 | 1 | 0 | 50 | 52  | 19923540 | 5.51E-02 | 1 |
| KIAA1522 | 1339617 | 195  | 26  | 2587764 | 948384  | 0 | 16 | 3 | 0 | 50 | 75  | 22599948 | 5.54E-02 | 1 |
| TFAP2A   | 199695  | 375  | 6   | 1157356 | 339980  | 0 | 8  | 2 | 0 | 27 | 24  | 10300860 | 5.56E-02 | 1 |

|          |         |     |     |         |         |   |    |   |   |    |    |          |          |   |
|----------|---------|-----|-----|---------|---------|---|----|---|---|----|----|----------|----------|---|
| HSP90AB1 | 1037256 | 312 | 54  | 1888936 | 478820  | 0 | 8  | 2 | 0 | 44 | 60 | 16584260 | 5.57E-02 | 1 |
| NEK11    | 312654  | 797 | 12  | 1766472 | 388752  | 0 | 11 | 1 | 0 | 50 | 53 | 20648356 | 5.57E-02 | 1 |
| TCF21    | 102722  | 388 | -4  | 454256  | 131008  | 0 | 3  | 1 | 0 | 41 | 43 | 19368180 | 5.57E-02 | 1 |
| PLD5     | 75320   | 854 | -18 | 1173732 | 290496  | 0 | 7  | 0 | 0 | 50 | 63 | 20851276 | 5.60E-02 | 1 |
| STAM2    | 394536  | 218 | 24  | 1385552 | 355288  | 0 | 9  | 0 | 0 | 6  | 4  | 2548248  | 5.60E-02 | 1 |
| FAM120A  | 421454  | 547 | 35  | 2921336 | 845500  | 0 | 10 | 3 | 0 | 15 | 15 | 6881480  | 5.63E-02 | 1 |
| TBL1XR1  | 135357  | 433 | 0   | 1363836 | 346032  | 0 | 7  | 1 | 0 | 50 | 51 | 21514860 | 5.63E-02 | 1 |
| UBE2T    | 813304  | 325 | 32  | 524744  | 135280  | 0 | 4  | 0 | 0 | 50 | 57 | 21385276 | 5.64E-02 | 1 |
| C12orf4  | 283278  | 908 | 27  | 1467432 | 359916  | 0 | 7  | 1 | 0 | 36 | 23 | 12163808 | 5.64E-02 | 1 |
| ACPP     | 210154  | 765 | 13  | 1117840 | 291920  | 0 | 10 | 3 | 0 | 10 | 16 | 5055556  | 5.65E-02 | 1 |
| TRIM13   | 337743  | 357 | 44  | 1046996 | 274120  | 0 | 8  | 1 | 0 | 42 | 44 | 16112560 | 5.67E-02 | 1 |
| LRRFIP2  | 392784  | 376 | 27  | 1941268 | 487364  | 0 | 8  | 0 | 0 | 27 | 15 | 12139600 | 5.69E-02 | 1 |
| ZNF343   | 652241  | 477 | 33  | 1538988 | 396228  | 0 | 6  | 2 | 0 | 10 | 6  | 4985780  | 5.70E-02 | 1 |
| RHCE     | 667862  | 185 | 32  | 1091496 | 288360  | 0 | 9  | 1 | 0 | 50 | 47 | 19250700 | 5.71E-02 | 1 |
| SHOX2    | 162819  | 946 | -8  | 883948  | 278036  | 0 | 6  | 1 | 0 | 50 | 52 | 20953092 | 5.73E-02 | 1 |
| FAM132A  | 2356409 | 196 | 27  | 747956  | 257032  | 0 | 4  | 0 | 0 | 50 | 61 | 26748416 | 5.74E-02 | 1 |
| LYZL2    | 82218   | 425 | 28  | 512284  | 131720  | 0 | 3  | 0 | 0 | 50 | 34 | 19804636 | 5.85E-02 | 1 |
| LMO4     | 279257  | 521 | -10 | 433252  | 115700  | 0 | 3  | 0 | 0 | 50 | 62 | 24546200 | 5.86E-02 | 1 |
| ATP10D   | 93423   | 528 | 29  | 3663240 | 1002852 | 0 | 14 | 5 | 0 | 18 | 17 | 8751192  | 5.86E-02 | 1 |
| OPN1LW   | 2438903 | NaN | 17  | 928804  | 264152  | 0 | 5  | 0 | 0 | 50 | 67 | 30452240 | 5.87E-02 | 1 |
| ZNF622   | 203311  | 624 | -20 | 1240660 | 312212  | 0 | 7  | 0 | 0 | 27 | 36 | 14729856 | 5.87E-02 | 1 |
| HEXIM1   | 806811  | 207 | 32  | 897476  | 255964  | 0 | 9  | 1 | 0 | 50 | 63 | 22248576 | 5.87E-02 | 1 |
| SDHC     | 743182  | 293 | 35  | 557852  | 124600  | 0 | 3  | 0 | 0 | 50 | 77 | 27478216 | 5.91E-02 | 1 |
| GDF11    | 1814311 | 384 | 26  | 1003564 | 314348  | 0 | 8  | 0 | 0 | 35 | 27 | 11847680 | 5.93E-02 | 1 |
| PBLD     | 490115  | 250 | 17  | 825208  | 232112  | 0 | 6  | 0 | 0 | 50 | 54 | 21199800 | 5.94E-02 | 1 |
| ASB8     | 511392  | 352 | 32  | 719476  | 219296  | 0 | 4  | 0 | 0 | 50 | 55 | 18729516 | 5.95E-02 | 1 |
| PARD6A   | 1065785 | 147 | 41  | 832328  | 290140  | 0 | 7  | 2 | 0 | 21 | 38 | 13766876 | 5.95E-02 | 1 |
| ZNF236   | 124234  | 597 | 17  | 4756160 | 1286584 | 0 | 22 | 5 | 0 | 28 | 33 | 10624464 | 5.95E-02 | 1 |
| RPL23    | 1255539 | 159 | 41  | 368816  | 104308  | 0 | 3  | 0 | 0 | 50 | 69 | 22650856 | 5.97E-02 | 1 |
| HUS1B    | 138359  | 674 | 23  | 671416  | 224636  | 0 | 6  | 0 | 0 | 50 | 46 | 20248924 | 5.98E-02 | 1 |
| TPO      | 56524   | 599 | -23 | 2349600 | 710220  | 0 | 16 | 4 | 0 | 50 | 55 | 17505232 | 5.99E-02 | 1 |
| DNTT     | 780047  | 804 | 30  | 1331796 | 344964  | 0 | 8  | 1 | 0 | 50 | 45 | 24252856 | 6.00E-02 | 1 |
| HPS3     | 382046  | 386 | 7   | 2586340 | 702032  | 0 | 15 | 2 | 0 | 50 | 63 | 24274928 | 6.00E-02 | 1 |

|           |         |      |     |         |         |   |    |   |   |    |    |          |          |   |
|-----------|---------|------|-----|---------|---------|---|----|---|---|----|----|----------|----------|---|
| SCNM1     | 1562281 | 184  | 33  | 599148  | 168744  | 0 | 8  | 0 | 0 | 5  | 6  | 1818092  | 6.03E-02 | 1 |
| RHBDD1    | 221611  | 573  | 11  | 823072  | 215024  | 0 | 4  | 0 | 0 | 50 | 47 | 18548312 | 6.07E-02 | 1 |
| WAPAL     | 209036  | 398  | 4   | 3099336 | 793524  | 0 | 10 | 0 | 0 | 14 | 7  | 5913160  | 6.10E-02 | 1 |
| CCDC158   | 539298  | 436  | 24  | 2926676 | 740836  | 0 | 10 | 2 | 0 | 50 | 46 | 20299476 | 6.10E-02 | 1 |
| AGL       | 289704  | 595  | 9   | 4085812 | 1040588 | 0 | 20 | 2 | 0 | 44 | 41 | 19618092 | 6.10E-02 | 1 |
| ITPRIPL1  | 904852  | 213  | 43  | 1413676 | 412604  | 0 | 7  | 1 | 0 | 50 | 63 | 24111168 | 6.11E-02 | 1 |
| STEAP1    | 128669  | 1182 | -10 | 877184  | 231400  | 0 | 7  | 0 | 0 | 50 | 52 | 25939228 | 6.13E-02 | 1 |
| NCOA6     | 1006385 | 170  | 47  | 5138504 | 1530088 | 0 | 18 | 1 | 0 | 4  | 1  | 2424360  | 6.13E-02 | 1 |
| TRIP10    | 736129  | 272  | 27  | 1435748 | 371308  | 0 | 4  | 0 | 0 | 11 | 9  | 6014976  | 6.14E-02 | 1 |
| PYDC1     | NaN     | NaN  | NaN | 222144  | 72624   | 0 | 3  | 1 | 0 | 8  | 17 | 3998592  | 6.14E-02 | 1 |
| SCAND1    | 1257811 | 144  | 50  | 419724  | 161268  | 0 | 2  | 0 | 0 | 50 | 65 | 22258544 | 6.17E-02 | 1 |
| CIAO1     | 904852  | 213  | 43  | 875760  | 239232  | 0 | 5  | 0 | 0 | 50 | 63 | 24111168 | 6.18E-02 | 1 |
| FAM49A    | 8240    | 1427 | -4  | 867928  | 212888  | 0 | 7  | 1 | 0 | 48 | 41 | 20399868 | 6.22E-02 | 1 |
| DYNLT3    | 105234  | NaN  | 28  | 318976  | 72980   | 0 | 2  | 0 | 0 | 50 | 59 | 27275296 | 6.23E-02 | 1 |
| NDUFS4    | 186422  | 619  | 5   | 461376  | 121752  | 0 | 3  | 0 | 0 | 50 | 47 | 20980504 | 6.23E-02 | 1 |
| EFEMP1    | 376977  | 264  | -15 | 1292280 | 333216  | 0 | 8  | 1 | 0 | 50 | 67 | 19595664 | 6.24E-02 | 1 |
| KDR       | 175189  | 706  | 3   | 3533300 | 938416  | 0 | 15 | 2 | 0 | 16 | 15 | 7273080  | 6.25E-02 | 1 |
| IIST1H2BI | 394491  | 544  | 55  | 312212  | 96832   | 0 | 5  | 0 | 0 | 50 | 53 | 13774708 | 6.26E-02 | 1 |
| RNFT2     | 225255  | 411  | 4   | 1187616 | 350304  | 0 | 4  | 1 | 0 | 50 | 33 | 18818160 | 6.29E-02 | 1 |
| ZHX2      | 426706  | 533  | 13  | 2077972 | 611252  | 0 | 10 | 0 | 0 | 6  | 1  | 2171244  | 6.31E-02 | 1 |
| DIAPH2    | 56713   | NaN  | 30  | 2958716 | 740836  | 0 | 16 | 0 | 0 | 9  | 17 | 6191552  | 6.31E-02 | 1 |
| PRRC1     | 210691  | 763  | 12  | 1102532 | 360628  | 0 | 5  | 0 | 0 | 21 | 28 | 10516240 | 6.31E-02 | 1 |
| OIP5      | 897414  | 237  | 24  | 578856  | 177288  | 0 | 6  | 0 | 0 | 50 | 50 | 15496680 | 6.35E-02 | 1 |
| KIT       | 92734   | 649  | 0   | 2552164 | 665720  | 0 | 10 | 1 | 0 | 5  | 1  | 1811328  | 6.36E-02 | 1 |
| CLEC4E    | 321790  | 564  | 13  | 588112  | 138128  | 0 | 5  | 0 | 0 | 50 | 64 | 21703896 | 6.37E-02 | 1 |
| CASP4     | 45234   | 626  | -20 | 995732  | 251692  | 0 | 6  | 1 | 0 | 38 | 35 | 14987600 | 6.39E-02 | 1 |
| PON1      | 134258  | 327  | -2  | 926668  | 250268  | 0 | 4  | 0 | 0 | 50 | 49 | 23047084 | 6.39E-02 | 1 |
| SMC6      | 135213  | 1245 | 1   | 2918844 | 690996  | 0 | 8  | 0 | 0 | 11 | 3  | 5101124  | 6.41E-02 | 1 |
| TCN2      | 723012  | 330  | 56  | 1091496 | 313992  | 0 | 6  | 1 | 0 | 50 | 37 | 15331496 | 6.42E-02 | 1 |
| TGOLN2    | 975949  | 211  | 18  | 1095412 | 320756  | 0 | 8  | 0 | 0 | 9  | 4  | 2652200  | 6.44E-02 | 1 |
| TMEM67    | 234269  | 416  | 15  | 2752948 | 707372  | 0 | 13 | 0 | 0 | 7  | 5  | 4090796  | 6.44E-02 | 1 |
| BGLAP     | 2266205 | 211  | 33  | 265576  | 72980   | 0 | 2  | 0 | 0 | 50 | 61 | 22146048 | 6.46E-02 | 1 |
| SUPT3H    | 68471   | 830  | 4   | 975796  | 238520  | 0 | 5  | 0 | 0 | 50 | 60 | 21955232 | 6.47E-02 | 1 |

|          |         |      |     |         |         |   |    |   |   |    |     |          |          |   |
|----------|---------|------|-----|---------|---------|---|----|---|---|----|-----|----------|----------|---|
| HAUS3    | 836839  | 332  | 29  | 1565688 | 382344  | 0 | 11 | 0 | 0 | 26 | 24  | 12052380 | 6.49E-02 | 1 |
| CD207    | 596622  | 629  | 24  | 848348  | 229264  | 0 | 5  | 2 | 0 | 33 | 30  | 10462128 | 6.49E-02 | 1 |
| GAL3ST1  | 653792  | 330  | 28  | 1044504 | 322536  | 0 | 7  | 0 | 0 | 37 | 30  | 15384540 | 6.49E-02 | 1 |
| TDRD3    | 69594   | 808  | 16  | 1929876 | 514776  | 0 | 9  | 0 | 0 | 16 | 10  | 6000380  | 6.53E-02 | 1 |
| ZFAND2B  | 773232  | 177  | 36  | 674976  | 185832  | 0 | 5  | 1 | 0 | 50 | 56  | 19964124 | 6.54E-02 | 1 |
| CCDC47   | 1259976 | 346  | 12  | 1298332 | 303668  | 0 | 10 | 1 | 0 | 50 | 91  | 25277780 | 6.55E-02 | 1 |
| SLC30A6  | 387408  | 276  | 25  | 1200432 | 337488  | 0 | 7  | 0 | 0 | 29 | 42  | 15012520 | 6.55E-02 | 1 |
| CHRAC1   | 432697  | 238  | 39  | 343896  | 87576   | 0 | 2  | 0 | 0 | 50 | 35  | 17934568 | 6.64E-02 | 1 |
| TDRD6    | 141781  | 596  | 1   | 5267732 | 1463872 | 0 | 18 | 1 | 0 | 22 | 11  | 8910324  | 6.64E-02 | 1 |
| ANXA7    | 847821  | 249  | 45  | 1263800 | 357424  | 0 | 5  | 0 | 0 | 50 | 67  | 24394188 | 6.69E-02 | 1 |
| VIPR2    | 179290  | 348  | -24 | 1135640 | 322180  | 0 | 4  | 2 | 0 | 29 | 35  | 14049184 | 6.70E-02 | 1 |
| C14orf39 | 325446  | 618  | 0   | 1600220 | 356356  | 0 | 9  | 0 | 0 | 50 | 64  | 21583212 | 6.70E-02 | 1 |
| CPLX1    | 694849  | 268  | 39  | 357068  | 88288   | 0 | 3  | 0 | 0 | 50 | 78  | 26245744 | 6.70E-02 | 1 |
| EIF3I    | 1460758 | 218  | 29  | 871844  | 217516  | 0 | 7  | 0 | 0 | 50 | 52  | 21684672 | 6.71E-02 | 1 |
| HK1      | 712074  | 229  | 47  | 2518344 | 692064  | 0 | 11 | 3 | 0 | 50 | 40  | 22123620 | 6.72E-02 | 1 |
| RAI1     | 1199281 | 260  | 16  | 4631560 | 1495556 | 0 | 17 | 4 | 0 | 49 | 57  | 22510236 | 6.73E-02 | 1 |
| NUCB1    | 1927185 | 211  | 43  | 1202568 | 328944  | 0 | 7  | 0 | 0 | 50 | 57  | 20562560 | 6.76E-02 | 1 |
| CCDC102E | 70753   | 1048 | -8  | 1353156 | 323604  | 0 | 7  | 3 | 0 | 50 | 52  | 21477480 | 6.77E-02 | 1 |
| FAHD2A   | 255441  | 536  | 19  | 802780  | 236384  | 0 | 3  | 0 | 0 | 50 | 38  | 18741976 | 6.78E-02 | 1 |
| NIPA2    | 352778  | 529  | -8  | 908868  | 269136  | 0 | 4  | 0 | 0 | 50 | 53  | 22668300 | 6.80E-02 | 1 |
| CALD1    | 390559  | 513  | 17  | 2138848 | 519404  | 0 | 13 | 2 | 0 | 50 | 64  | 22455412 | 6.81E-02 | 1 |
| ZBTB7B   | 1612870 | 224  | 35  | 1312216 | 426488  | 0 | 8  | 1 | 0 | 50 | 56  | 18488504 | 6.84E-02 | 1 |
| BAMBI    | 204133  | 418  | 13  | 665720  | 179068  | 0 | 5  | 1 | 0 | 50 | 50  | 21099052 | 6.84E-02 | 1 |
| LRRC18   | NaN     | NaN  | NaN | 657176  | 188680  | 0 | 5  | 1 | 0 | 50 | 117 | 39834264 | 6.92E-02 | 1 |
| BRCA1    | 1466229 | 201  | 27  | 4921344 | 1219656 | 0 | 14 | 1 | 0 | 22 | 8   | 6972616  | 6.92E-02 | 1 |
| NSUN3    | 85578   | 1378 | -9  | 875404  | 238520  | 0 | 3  | 0 | 0 | 50 | 47  | 24136444 | 6.95E-02 | 1 |
| MAGOH    | 545236  | 258  | 25  | 397652  | 92560   | 0 | 3  | 1 | 0 | 6  | 4   | 1742620  | 6.96E-02 | 1 |
| RAB38    | 149319  | 616  | -15 | 545392  | 144536  | 0 | 5  | 0 | 0 | 50 | 53  | 24409140 | 6.97E-02 | 1 |
| COL25A1  | 157338  | 437  | -5  | 1797800 | 542188  | 0 | 7  | 1 | 0 | 50 | 51  | 20741628 | 6.98E-02 | 1 |
| AMACR    | 270768  | 793  | 4   | 1328236 | 268424  | 0 | 7  | 2 | 0 | 50 | 66  | 23758728 | 7.00E-02 | 1 |
| ACP5     | 1152381 | 272  | 31  | 807764  | 251692  | 0 | 8  | 0 | 0 | 50 | 48  | 19593884 | 7.01E-02 | 1 |
| IL10RA   | 581910  | 576  | 49  | 1450700 | 432184  | 0 | 6  | 1 | 0 | 41 | 38  | 14796784 | 7.03E-02 | 1 |
| MFSD8    | 230666  | 331  | 9   | 1343188 | 370952  | 0 | 8  | 2 | 0 | 50 | 50  | 19138560 | 7.07E-02 | 1 |

|          |         |     |     |         |         |   |    |   |   |    |     |          |          |   |
|----------|---------|-----|-----|---------|---------|---|----|---|---|----|-----|----------|----------|---|
| ACTL6A   | 399933  | 477 | 11  | 1147388 | 290140  | 0 | 10 | 1 | 0 | 50 | 51  | 21358576 | 7.08E-02 | 1 |
| POP1     | 635159  | 368 | 44  | 2616600 | 731580  | 0 | 7  | 0 | 0 | 9  | 2   | 5371328  | 7.10E-02 | 1 |
| CADM3    | 99569   | 785 | 14  | 1109652 | 316128  | 0 | 4  | 3 | 0 | 36 | 28  | 11476372 | 7.12E-02 | 1 |
| ACY3     | 1408104 | 424 | 60  | 799932  | 250980  | 0 | 7  | 0 | 0 | 50 | 64  | 18269920 | 7.18E-02 | 1 |
| IVNS1ABF | 325191  | 535 | -10 | 1690288 | 425420  | 0 | 9  | 1 | 0 | 50 | 54  | 21252844 | 7.19E-02 | 1 |
| CEP97    | 547972  | 421 | 9   | 2219304 | 600216  | 0 | 10 | 2 | 0 | 17 | 24  | 9166288  | 7.19E-02 | 1 |
| PTBP2    | 334207  | 676 | -16 | 1376652 | 383412  | 0 | 8  | 0 | 0 | 25 | 22  | 6910672  | 7.20E-02 | 1 |
| ZNF582   | 164565  | 599 | -49 | 1359564 | 317196  | 0 | 9  | 0 | 0 | 8  | 8   | 3522976  | 7.21E-02 | 1 |
| C12orf45 | 514255  | 204 | 37  | 487720  | 125312  | 0 | 4  | 0 | 0 | 50 | 62  | 18692848 | 7.22E-02 | 1 |
| SLC38A2  | 755445  | 311 | 14  | 1331440 | 357068  | 0 | 11 | 3 | 0 | 5  | 8   | 2807772  | 7.23E-02 | 1 |
| BASP1    | 237391  | 349 | -10 | 564972  | 169812  | 0 | 3  | 1 | 0 | 50 | 43  | 20754444 | 7.23E-02 | 1 |
| CCNE2    | 424520  | 389 | 43  | 1084020 | 260592  | 0 | 5  | 0 | 0 | 50 | 43  | 20079112 | 7.24E-02 | 1 |
| ARID2    | 820796  | 602 | 10  | 4610200 | 1357784 | 0 | 29 | 6 | 0 | 0  | 6   | 1357784  | 7.24E-02 | 1 |
| NSMAF    | 200152  | 574 | 17  | 2589900 | 646140  | 0 | 13 | 3 | 0 | 35 | 26  | 10153832 | 7.24E-02 | 1 |
| BEX1     | 456169  | NaN | 16  | 329300  | 78676   | 0 | 3  | 0 | 0 | 50 | 53  | 18791104 | 7.25E-02 | 1 |
| THAP11   | 1039476 | 143 | 49  | 766468  | 242792  | 0 | 5  | 1 | 0 | 50 | 49  | 20248924 | 7.26E-02 | 1 |
| LRRC6    | 188389  | 902 | -4  | 1254544 | 290852  | 0 | 8  | 1 | 0 | 50 | 43  | 15828472 | 7.27E-02 | 1 |
| ZDHHC21  | 203594  | 844 | -18 | 695268  | 186900  | 0 | 4  | 0 | 0 | 50 | 72  | 22309808 | 7.29E-02 | 1 |
| ITGBL1   | 26094   | 536 | -6  | 1324320 | 304380  | 0 | 5  | 0 | 0 | 50 | 61  | 22001868 | 7.29E-02 | 1 |
| NFKBIA   | 416091  | 125 | 31  | 808120  | 232112  | 0 | 6  | 0 | 0 | 32 | 27  | 13205108 | 7.30E-02 | 1 |
| HNF4G    | 47353   | 914 | 7   | 1175512 | 294056  | 0 | 5  | 1 | 0 | 50 | 57  | 25542288 | 7.32E-02 | 1 |
| ZNF26    | NaN     | NaN | NaN | 1389824 | 333928  | 0 | 8  | 0 | 0 | 50 | 116 | 39979512 | 7.33E-02 | 1 |
| CCNH     | 125767  | 837 | 8   | 857960  | 214312  | 0 | 5  | 1 | 0 | 50 | 65  | 21749464 | 7.33E-02 | 1 |
| AUP1     | 1019591 | 315 | 50  | 1038452 | 325384  | 0 | 7  | 2 | 0 | 40 | 63  | 17658668 | 7.36E-02 | 1 |
| RAB21    | 260669  | 431 | -3  | 592028  | 157708  | 0 | 2  | 0 | 0 | 50 | 47  | 20123612 | 7.38E-02 | 1 |
| BRCA2    | 221300  | 462 | 44  | 8815984 | 2249564 | 0 | 39 | 4 | 0 | 9  | 11  | 5327540  | 7.39E-02 | 1 |
| EIF3K    | 1496245 | 363 | 27  | 591672  | 142044  | 0 | 4  | 1 | 0 | 50 | 65  | 19481388 | 7.40E-02 | 1 |
| NOP16    | 576954  | 347 | 45  | 467784  | 121752  | 0 | 3  | 0 | 0 | 50 | 48  | 20914644 | 7.40E-02 | 1 |
| EMD      | 2277674 | NaN | 40  | 652904  | 185476  | 0 | 4  | 0 | 0 | 50 | 46  | 20570392 | 7.41E-02 | 1 |
| CEACAM8  | 495357  | 380 | 5   | 879676  | 265220  | 0 | 7  | 0 | 0 | 50 | 53  | 24055276 | 7.43E-02 | 1 |
| PHF1     | 1441897 | 236 | 31  | 1522968 | 356712  | 0 | 9  | 2 | 0 | 50 | 72  | 19862664 | 7.44E-02 | 1 |
| MRM1     | 468055  | 548 | 23  | 866504  | 284800  | 0 | 7  | 1 | 0 | 50 | 60  | 18803564 | 7.45E-02 | 1 |
| QPCT     | 495490  | 182 | 32  | 925600  | 259880  | 0 | 4  | 1 | 0 | 50 | 62  | 19063800 | 7.48E-02 | 1 |



|         |         |      |     |         |         |   |    |   |   |    |     |          |          |   |
|---------|---------|------|-----|---------|---------|---|----|---|---|----|-----|----------|----------|---|
| CX3CL1  | 749108  | 159  | 39  | 969744  | 316128  | 0 | 7  | 1 | 0 | 50 | 52  | 18373516 | 7.50E-02 | 1 |
| TMEM50A | 671522  | 270  | 35  | 424352  | 107512  | 0 | 3  | 0 | 0 | 50 | 57  | 20137496 | 7.53E-02 | 1 |
| APOBEC4 | NaN     | NaN  | NaN | 930584  | 252760  | 0 | 7  | 0 | 0 | 50 | 116 | 39898344 | 7.55E-02 | 1 |
| MCTS1   | 388105  | NaN  | 7   | 502316  | 119260  | 0 | 4  | 0 | 0 | 50 | 56  | 20001504 | 7.56E-02 | 1 |
| GAL3ST4 | 1299015 | 205  | 52  | 1174800 | 394092  | 0 | 7  | 0 | 0 | 50 | 42  | 20842020 | 7.57E-02 | 1 |
| ZNF791  | 1975767 | 409  | 1   | 1501608 | 359916  | 0 | 9  | 1 | 0 | 50 | 74  | 27829232 | 7.57E-02 | 1 |
| RSRC2   | 868107  | 154  | 39  | 1179072 | 291564  | 0 | 9  | 1 | 0 | 50 | 52  | 20672564 | 7.59E-02 | 1 |
| MTMR4   | 855696  | 384  | 23  | 3060176 | 848704  | 0 | 13 | 4 | 0 | 50 | 77  | 27314812 | 7.60E-02 | 1 |
| EIF4G3  | 661924  | 406  | 22  | 4090084 | 1119620 | 0 | 24 | 5 | 0 | 45 | 72  | 24004724 | 7.61E-02 | 1 |
| MEM120E | 796879  | 190  | 43  | 905664  | 230688  | 0 | 4  | 0 | 0 | 50 | 58  | 17354288 | 7.64E-02 | 1 |
| FAM76A  | 735205  | 210  | 35  | 911360  | 224992  | 0 | 6  | 1 | 0 | 50 | 50  | 19959496 | 7.66E-02 | 1 |
| ENAM    | 262250  | 609  | 16  | 2914216 | 782132  | 0 | 11 | 1 | 0 | 17 | 13  | 9977612  | 7.67E-02 | 1 |
| ZNHIT1  | 1022626 | 258  | 39  | 400500  | 113208  | 0 | 4  | 0 | 0 | 50 | 67  | 19705312 | 7.67E-02 | 1 |
| POLQ    | 292766  | 680  | 7   | 6645096 | 1780356 | 0 | 26 | 3 | 0 | 9  | 13  | 4844092  | 7.67E-02 | 1 |
| CEACAM1 | 495357  | 380  | 5   | 1417948 | 408332  | 0 | 5  | 2 | 0 | 28 | 26  | 11732692 | 7.67E-02 | 1 |
| KLK15   | 655673  | 589  | 25  | 646496  | 196156  | 0 | 6  | 1 | 0 | 50 | 77  | 24644100 | 7.68E-02 | 1 |
| AFF3    | 353071  | 868  | 12  | 3217884 | 891780  | 0 | 20 | 6 | 0 | 50 | 70  | 18120044 | 7.68E-02 | 1 |
| ANKRD35 | NaN     | NaN  | NaN | 2493068 | 772876  | 0 | 10 | 2 | 0 | 50 | 118 | 40418460 | 7.69E-02 | 1 |
| GIMAP2  | 682986  | 689  | 20  | 866860  | 224636  | 0 | 4  | 1 | 0 | 50 | 48  | 19609904 | 7.77E-02 | 1 |
| FMR1NB  | 96935   | NaN  | -13 | 673552  | 170168  | 0 | 3  | 1 | 0 | 22 | 22  | 9148132  | 7.78E-02 | 1 |
| CLIP1   | 885125  | 222  | 41  | 3714504 | 959064  | 0 | 18 | 3 | 0 | 50 | 68  | 24466812 | 7.80E-02 | 1 |
| BMPR1B  | 119865  | 642  | -15 | 1311504 | 342828  | 0 | 5  | 1 | 0 | 8  | 6   | 4890728  | 7.81E-02 | 1 |
| PARGC1A | 19326   | 405  | 2   | 2061596 | 549664  | 0 | 10 | 1 | 0 | 50 | 46  | 18423356 | 7.83E-02 | 1 |
| RFWD3   | 577167  | 151  | 31  | 1975444 | 558920  | 0 | 8  | 2 | 0 | 50 | 56  | 21806780 | 7.85E-02 | 1 |
| PCK1    | 181790  | 562  | -4  | 1603424 | 431116  | 0 | 9  | 2 | 0 | 50 | 59  | 19947392 | 7.85E-02 | 1 |
| PDIK1L  | 783481  | 212  | 23  | 868640  | 235672  | 0 | 4  | 0 | 0 | 26 | 32  | 13104004 | 7.86E-02 | 1 |
| SNX16   | 156346  | 680  | 6   | 904952  | 230332  | 0 | 5  | 0 | 0 | 47 | 61  | 25211564 | 7.87E-02 | 1 |
| CRTP2   | 22916   | 1048 | -79 | 143824  | 37736   | 0 | 2  | 0 | 0 | 50 | 84  | 16257808 | 7.87E-02 | 1 |
| GPR85   | 110068  | 954  | -8  | 912072  | 276612  | 0 | 5  | 0 | 0 | 50 | 63  | 21424080 | 7.90E-02 | 1 |
| LCE1F   | 64902   | 818  | 18  | 295480  | 84728   | 0 | 2  | 0 | 0 | 50 | 55  | 20674344 | 7.90E-02 | 1 |
| CPEB3   | 423765  | 469  | 33  | 1793528 | 513352  | 0 | 5  | 0 | 0 | 14 | 5   | 4158436  | 7.92E-02 | 1 |
| FUCA2   | 338098  | 401  | 20  | 1202212 | 325028  | 0 | 6  | 0 | 0 | 20 | 21  | 11526924 | 7.93E-02 | 1 |
| MBP     | 102723  | 561  | 39  | 868996  | 247064  | 0 | 5  | 0 | 0 | 50 | 56  | 17082304 | 7.94E-02 | 1 |

|          |         |      |     |         |         |   |    |   |   |    |     |          |          |   |
|----------|---------|------|-----|---------|---------|---|----|---|---|----|-----|----------|----------|---|
| MUCL1    | 590746  | 746  | -4  | 232112  | 74404   | 0 | 2  | 0 | 0 | 50 | 57  | 21088728 | 7.96E-02 | 1 |
| KCNJ15   | 109140  | 246  | 56  | 939840  | 269136  | 0 | 5  | 1 | 0 | 50 | 61  | 21470360 | 7.96E-02 | 1 |
| MNDA     | 97345   | 985  | 2   | 1057676 | 275188  | 0 | 8  | 0 | 0 | 46 | 54  | 16686076 | 7.97E-02 | 1 |
| NBN      | 251472  | 419  | 35  | 1985056 | 498044  | 0 | 11 | 1 | 0 | 48 | 47  | 18562552 | 7.98E-02 | 1 |
| C1orf61  | 2199280 | 201  | 27  | 407620  | 116768  | 0 | 2  | 0 | 0 | 50 | 86  | 24636980 | 7.98E-02 | 1 |
| MAPRE2   | 261776  | 582  | 11  | 941620  | 233180  | 0 | 6  | 1 | 0 | 50 | 50  | 19558284 | 7.99E-02 | 1 |
| AKR1B15  | 403585  | 319  | 21  | 916700  | 231400  | 0 | 6  | 1 | 0 | 50 | 49  | 23084464 | 8.00E-02 | 1 |
| TRERF1   | 746644  | 342  | 44  | 3022440 | 881100  | 0 | 13 | 2 | 0 | 18 | 22  | 9631580  | 8.00E-02 | 1 |
| PLN      | 133888  | 1029 | 1   | 136704  | 37380   | 0 | 2  | 0 | 0 | 50 | 48  | 19834184 | 8.01E-02 | 1 |
| LTBP1    | 213347  | 605  | 2   | 4524404 | 1192600 | 0 | 16 | 5 | 0 | 50 | 51  | 19617024 | 8.01E-02 | 1 |
| STAT1    | 529053  | 318  | 42  | 2023148 | 482380  | 0 | 11 | 2 | 0 | 50 | 32  | 18744824 | 8.02E-02 | 1 |
| BTBD8    | 220071  | 406  | -6  | 1002852 | 247776  | 0 | 4  | 1 | 0 | 50 | 44  | 20928172 | 8.05E-02 | 1 |
| C16orf70 | 1093307 | 150  | 47  | 1128520 | 290852  | 0 | 5  | 1 | 0 | 50 | 53  | 22438680 | 8.07E-02 | 1 |
| HOXB4    | 946208  | 524  | 29  | 616948  | 196868  | 0 | 5  | 0 | 0 | 50 | 60  | 17564684 | 8.07E-02 | 1 |
| RNF141   | 755456  | 391  | 25  | 604844  | 156640  | 0 | 5  | 0 | 0 | 50 | 63  | 27469316 | 8.09E-02 | 1 |
| ARHGAP9  | 1347802 | 194  | 32  | 1842300 | 575652  | 0 | 11 | 2 | 0 | 50 | 70  | 20818880 | 8.10E-02 | 1 |
| OR4K5    | 431654  | 854  | -49 | 793524  | 242436  | 0 | 9  | 0 | 0 | 50 | 78  | 18107940 | 8.11E-02 | 1 |
| DTWD1    | 206183  | 390  | -22 | 799932  | 194376  | 0 | 5  | 0 | 0 | 50 | 62  | 25111528 | 8.11E-02 | 1 |
| CARS2    | 532346  | 216  | 42  | 1456040 | 416164  | 0 | 7  | 0 | 0 | 26 | 18  | 8707760  | 8.14E-02 | 1 |
| CHMP2A   | 2673870 | 276  | 11  | 581704  | 156284  | 0 | 4  | 0 | 0 | 50 | 60  | 24216900 | 8.15E-02 | 1 |
| CKS2     | 163101  | 627  | 15  | 220720  | 46280   | 0 | 3  | 0 | 0 | 50 | 61  | 18462516 | 8.17E-02 | 1 |
| RPL26    | 772200  | 257  | 20  | 382344  | 100392  | 0 | 4  | 0 | 0 | 50 | 52  | 17300532 | 8.19E-02 | 1 |
| HIST3H2A | 626588  | 351  | 7   | 314704  | 109292  | 0 | 3  | 1 | 0 | 17 | 22  | 7678564  | 8.19E-02 | 1 |
| CD274    | 348920  | 629  | 23  | 763620  | 194376  | 0 | 4  | 0 | 0 | 50 | 50  | 21714932 | 8.20E-02 | 1 |
| FGF10    | 107231  | 886  | -39 | 536136  | 142044  | 0 | 5  | 0 | 0 | 50 | 64  | 16624488 | 8.22E-02 | 1 |
| LAMA4    | 131437  | 282  | -7  | 4881116 | 1300468 | 0 | 21 | 6 | 0 | 50 | 50  | 21050280 | 8.26E-02 | 1 |
| SPRR1B   | 687290  | 704  | 30  | 230688  | 61944   | 0 | 2  | 0 | 0 | 50 | 34  | 21429064 | 8.32E-02 | 1 |
| BRMS1    | 1963418 | 182  | 55  | 782844  | 198648  | 0 | 5  | 1 | 0 | 50 | 53  | 20984776 | 8.32E-02 | 1 |
| CT47B1   | NaN     | NaN  | NaN | 740836  | 228908  | 0 | 5  | 0 | 0 | 50 | 116 | 39874492 | 8.33E-02 | 1 |
| FTSJ3    | 1353057 | 346  | 20  | 2207200 | 595232  | 0 | 9  | 3 | 0 | 50 | 79  | 25722780 | 8.34E-02 | 1 |
| ERGIC2   | 100875  | 599  | -3  | 1016380 | 250268  | 0 | 6  | 2 | 0 | 11 | 18  | 5749044  | 8.37E-02 | 1 |
| CLVS1    | 491040  | 596  | 1   | 907088  | 247420  | 0 | 6  | 0 | 0 | 50 | 81  | 24640896 | 8.40E-02 | 1 |
| ACTL8    | 249962  | 416  | 27  | 909580  | 274832  | 0 | 6  | 2 | 0 | 32 | 30  | 12207952 | 8.42E-02 | 1 |

|           |         |      |     |          |         |   |    |    |   |    |    |          |          |   |
|-----------|---------|------|-----|----------|---------|---|----|----|---|----|----|----------|----------|---|
| NGDN      | 1220464 | 499  | 27  | 843364   | 220364  | 0 | 5  | 0  | 0 | 50 | 79 | 23877276 | 8.45E-02 | 1 |
| IFI44L    | 161560  | 636  | -13 | 1181920  | 303668  | 0 | 7  | 0  | 0 | 50 | 44 | 20899692 | 8.46E-02 | 1 |
| SNCB      | 579630  | 359  | 40  | 358136   | 95764   | 0 | 4  | 0  | 0 | 50 | 54 | 21554376 | 8.47E-02 | 1 |
| TNFSF13B  | 66992   | 899  | 1   | 728020   | 211820  | 0 | 5  | 1  | 0 | 25 | 16 | 9186580  | 8.48E-02 | 1 |
| DCLK1     | 82515   | 1033 | -14 | 1877544  | 534000  | 0 | 10 | 0  | 0 | 17 | 15 | 9027448  | 8.49E-02 | 1 |
| PRPS1     | 226650  | NaN  | 57  | 820224   | 227484  | 0 | 4  | 2  | 0 | 50 | 61 | 24225800 | 8.50E-02 | 1 |
| WFDC2     | 1053862 | 382  | 36  | 325384   | 89000   | 0 | 2  | 0  | 0 | 50 | 76 | 17660804 | 8.51E-02 | 1 |
| STAU1     | 877789  | 147  | 49  | 1499116  | 423284  | 0 | 9  | 2  | 0 | 50 | 77 | 23875852 | 8.54E-02 | 1 |
| PAGE5     | 140886  | NaN  | 18  | 345320   | 91492   | 0 | 3  | 0  | 0 | 50 | 55 | 17222212 | 8.54E-02 | 1 |
| FLG       | 433645  | 548  | 21  | 10044184 | 2979008 | 0 | 61 | 11 | 0 | 27 | 45 | 14085496 | 8.54E-02 | 1 |
| OPCML     | 9310    | 1074 | -19 | 934144   | 269492  | 0 | 7  | 2  | 0 | 50 | 73 | 19704956 | 8.54E-02 | 1 |
| CRHR2     | 484075  | 433  | 32  | 1074052  | 292988  | 0 | 5  | 2  | 0 | 36 | 33 | 13132128 | 8.56E-02 | 1 |
| CRAT      | 1428394 | 206  | 30  | 1611612  | 452832  | 0 | 9  | 0  | 0 | 50 | 55 | 20767616 | 8.56E-02 | 1 |
| RBM27     | 394957  | 229  | 31  | 2728740  | 756144  | 0 | 11 | 2  | 0 | 43 | 36 | 17421216 | 8.56E-02 | 1 |
| TAF15     | 620019  | 235  | 8   | 1551092  | 415096  | 0 | 7  | 0  | 0 | 43 | 53 | 21666160 | 8.57E-02 | 1 |
| HIST1H4A  | 408919  | 685  | 43  | 249556   | 85796   | 0 | 2  | 0  | 0 | 50 | 57 | 16881520 | 8.59E-02 | 1 |
| MACF1     | 767679  | 401  | 25  | 19222576 | 5170544 | 0 | 77 | 10 | 0 | 10 | 17 | 8731256  | 8.60E-02 | 1 |
| GABRA6    | 12083   | 986  | -6  | 1168036  | 320756  | 0 | 7  | 0  | 0 | 34 | 44 | 11061276 | 8.61E-02 | 1 |
| GRB14     | 71885   | 630  | -5  | 1420084  | 368816  | 0 | 6  | 2  | 0 | 38 | 33 | 14674320 | 8.63E-02 | 1 |
| MEF2A     | 197556  | 416  | 12  | 1417592  | 393736  | 0 | 6  | 0  | 0 | 50 | 51 | 22730244 | 8.63E-02 | 1 |
| CADM2     | 8467    | 1155 | -19 | 1180140  | 328944  | 0 | 11 | 2  | 0 | 16 | 20 | 5719496  | 8.65E-02 | 1 |
| CTHRC1    | 428438  | 615  | 23  | 612676   | 184052  | 0 | 3  | 0  | 0 | 50 | 52 | 16150296 | 8.67E-02 | 1 |
| NDC80     | 374218  | 390  | 0   | 1723752  | 406908  | 0 | 12 | 2  | 0 | 50 | 50 | 19166684 | 8.69E-02 | 1 |
| CAMKK2    | 981640  | 258  | 42  | 1545040  | 419012  | 0 | 5  | 0  | 0 | 16 | 19 | 9214704  | 8.70E-02 | 1 |
| SMG7      | 716427  | 385  | 25  | 3255620  | 887152  | 0 | 10 | 2  | 0 | 24 | 30 | 14903228 | 8.70E-02 | 1 |
| HD1-EIF4I | 688522  | 296  | 30  | 6630144  | 1934148 | 0 | 28 | 5  | 0 | 31 | 30 | 15168448 | 8.72E-02 | 1 |
| SAMD7     | 400118  | 622  | 17  | 1141692  | 320400  | 0 | 6  | 0  | 0 | 50 | 55 | 20217596 | 8.76E-02 | 1 |
| LRP6      | 412583  | 408  | 15  | 4144908  | 1120332 | 0 | 16 | 4  | 0 | 50 | 38 | 14295892 | 8.78E-02 | 1 |
| ALG1L     | 213057  | 583  | 19  | 493772   | 132076  | 0 | 4  | 0  | 0 | 50 | 28 | 15956988 | 8.78E-02 | 1 |
| RCOR2     | 1321109 | 201  | 51  | 1320760  | 405128  | 0 | 5  | 0  | 0 | 50 | 43 | 20743408 | 8.78E-02 | 1 |
| OR2V2     | 978482  | 478  | 29  | 781776   | 229620  | 0 | 6  | 1  | 0 | 50 | 67 | 21549748 | 8.79E-02 | 1 |
| PRKAR1B   | 543988  | 401  | 7   | 986120   | 280528  | 0 | 4  | 1  | 0 | 50 | 59 | 24878704 | 8.80E-02 | 1 |
| OMP       | 437413  | 450  | 40  | 402280   | 122108  | 0 | 4  | 0  | 0 | 50 | 69 | 21014324 | 8.81E-02 | 1 |

|         |         |     |     |         |         |   |    |   |   |    |     |          |          |   |
|---------|---------|-----|-----|---------|---------|---|----|---|---|----|-----|----------|----------|---|
| C1QTNF7 | 144115  | 540 | 20  | 740124  | 220008  | 0 | 5  | 1 | 0 | 4  | 3   | 2249920  | 8.84E-02 | 1 |
| MMD2    | 1539893 | 542 | 5   | 704168  | 189748  | 0 | 4  | 1 | 0 | 50 | 83  | 26270664 | 8.86E-02 | 1 |
| PARP14  | 427462  | 423 | 47  | 4622660 | 1221436 | 0 | 17 | 4 | 0 | 24 | 26  | 11210440 | 8.86E-02 | 1 |
| UCP1    | 125708  | 752 | 7   | 774300  | 233892  | 0 | 4  | 0 | 0 | 50 | 77  | 23962716 | 8.87E-02 | 1 |
| NDUFAF1 | 897414  | 237 | 24  | 845856  | 224280  | 0 | 5  | 0 | 0 | 50 | 50  | 15496680 | 8.88E-02 | 1 |
| GHSR    | 327135  | 420 | 17  | 953368  | 306872  | 0 | 5  | 2 | 0 | 40 | 55  | 19696056 | 8.89E-02 | 1 |
| ENO3    | 1416161 | 231 | 30  | 1127096 | 315772  | 0 | 5  | 1 | 0 | 50 | 65  | 18681100 | 8.89E-02 | 1 |
| C1orf35 | 702621  | 391 | 5   | 690996  | 186900  | 0 | 5  | 1 | 0 | 50 | 46  | 17014308 | 8.89E-02 | 1 |
| ODC1    | 732059  | 270 | 47  | 1206840 | 316128  | 0 | 5  | 1 | 0 | 50 | 54  | 22328320 | 8.90E-02 | 1 |
| IQCB1   | 371177  | 520 | 32  | 1570316 | 404416  | 0 | 10 | 1 | 0 | 50 | 52  | 21325824 | 8.91E-02 | 1 |
| FAM78B  | 320493  | 733 | -12 | 651124  | 192596  | 0 | 4  | 1 | 0 | 50 | 66  | 19477116 | 8.93E-02 | 1 |
| CALM1   | 323571  | 599 | 21  | 410468  | 91492   | 0 | 2  | 0 | 0 | 48 | 43  | 20523756 | 8.95E-02 | 1 |
| PRPF19  | 794900  | 522 | 47  | 1311860 | 370240  | 0 | 6  | 1 | 0 | 50 | 51  | 21913580 | 8.95E-02 | 1 |
| CDK13   | 221361  | 636 | 14  | 3770396 | 1132792 | 0 | 12 | 3 | 0 | 12 | 30  | 12996492 | 8.97E-02 | 1 |
| SLC28A3 | 396533  | 595 | 2   | 1804564 | 491636  | 0 | 9  | 1 | 0 | 50 | 70  | 22864456 | 9.05E-02 | 1 |
| OR2T3   | 112460  | 903 | -20 | 786048  | 236028  | 0 | 5  | 1 | 0 | 50 | 74  | 22093716 | 9.09E-02 | 1 |
| PLA2G4C | 983603  | 431 | 26  | 1479892 | 396584  | 0 | 9  | 1 | 0 | 50 | 83  | 25596756 | 9.12E-02 | 1 |
| STON1   | NaN     | NaN | NaN | 1868644 | 504452  | 0 | 12 | 3 | 0 | 50 | 119 | 40150036 | 9.13E-02 | 1 |
| GMFB    | 466180  | 371 | 28  | 395516  | 90424   | 0 | 3  | 0 | 0 | 50 | 50  | 17319044 | 9.14E-02 | 1 |
| FAM184A | 115280  | 856 | -1  | 3015676 | 712712  | 0 | 10 | 1 | 0 | 50 | 54  | 23034980 | 9.14E-02 | 1 |
| CACNG7  | 813774  | 360 | -33 | 703100  | 200428  | 0 | 5  | 0 | 0 | 16 | 28  | 7035272  | 9.14E-02 | 1 |
| C8orf86 | 840384  | 454 | 46  | 553580  | 174796  | 0 | 4  | 1 | 0 | 50 | 68  | 24507752 | 9.14E-02 | 1 |
| SKP1    | 766424  | 144 | 54  | 464224  | 107156  | 0 | 4  | 0 | 0 | 50 | 96  | 21985492 | 9.15E-02 | 1 |
| ATP5S   | 666223  | 337 | 28  | 614456  | 145960  | 0 | 3  | 1 | 0 | 6  | 6   | 2954088  | 9.16E-02 | 1 |
| MRPS24  | 872910  | 239 | 44  | 425064  | 128160  | 0 | 3  | 0 | 0 | 50 | 64  | 22627716 | 9.19E-02 | 1 |
| EDN2    | 220093  | 381 | 32  | 451052  | 141688  | 0 | 3  | 0 | 0 | 50 | 53  | 21344692 | 9.25E-02 | 1 |
| HSPA4L  | 222085  | 352 | 31  | 2226780 | 541476  | 0 | 9  | 2 | 0 | 50 | 48  | 19084448 | 9.26E-02 | 1 |
| NHLRC4  | 1115707 | 213 | 39  | 294768  | 102528  | 0 | 2  | 0 | 0 | 50 | 53  | 16969808 | 9.27E-02 | 1 |
| ERP44   | 246986  | 681 | 19  | 1090072 | 260948  | 0 | 5  | 0 | 0 | 50 | 57  | 21080540 | 9.31E-02 | 1 |
| NAA15   | 389880  | 299 | 26  | 2323968 | 535068  | 0 | 14 | 1 | 0 | 50 | 59  | 24407716 | 9.31E-02 | 1 |
| PRDX3   | 789279  | 149 | 29  | 665008  | 186188  | 0 | 3  | 0 | 0 | 50 | 67  | 23654420 | 9.32E-02 | 1 |
| WWC3    | 169744  | NaN | 34  | 2771104 | 824852  | 0 | 8  | 3 | 0 | 29 | 31  | 14260292 | 9.34E-02 | 1 |
| ERI3    | 758083  | 308 | 29  | 873624  | 243504  | 0 | 5  | 0 | 0 | 50 | 40  | 24339720 | 9.35E-02 | 1 |

|          |         |      |     |          |         |   |    |   |   |    |     |          |          |   |
|----------|---------|------|-----|----------|---------|---|----|---|---|----|-----|----------|----------|---|
| UBE2L3   | 521773  | 194  | 37  | 411536   | 100036  | 0 | 3  | 0 | 0 | 50 | 70  | 19466792 | 9.39E-02 | 1 |
| RAB3GAP1 | 358477  | 577  | 26  | 2588120  | 685300  | 0 | 11 | 1 | 0 | 8  | 9   | 4867588  | 9.41E-02 | 1 |
| OR52A5   | 109516  | 1024 | -15 | 783912   | 230688  | 0 | 5  | 1 | 0 | 9  | 5   | 3195456  | 9.41E-02 | 1 |
| SDHAF2   | 1404745 | 245  | 58  | 438236   | 111784  | 0 | 3  | 1 | 0 | 50 | 41  | 15958412 | 9.42E-02 | 1 |
| FBN3     | 914975  | 258  | 15  | 7301916  | 1968324 | 0 | 26 | 7 | 0 | 50 | 62  | 22031416 | 9.48E-02 | 1 |
| RPS18    | 1456953 | 262  | 30  | 401924   | 113920  | 0 | 5  | 0 | 0 | 50 | 71  | 20945260 | 9.48E-02 | 1 |
| MPEG1    | 542222  | 686  | 9   | 1766116  | 531152  | 0 | 8  | 2 | 0 | 50 | 72  | 23453636 | 9.48E-02 | 1 |
| MLH1     | 392784  | 473  | 21  | 1977580  | 524744  | 0 | 9  | 2 | 0 | 24 | 30  | 11410512 | 9.48E-02 | 1 |
| SLC27A2  | 308506  | 282  | 1   | 1579216  | 448916  | 0 | 9  | 1 | 0 | 50 | 55  | 27381384 | 9.50E-02 | 1 |
| TMEM79   | 2266205 | 211  | 33  | 954080   | 324316  | 0 | 5  | 1 | 0 | 50 | 61  | 22146048 | 9.51E-02 | 1 |
| OR6Y1    | 179404  | 940  | 1   | 804204   | 238164  | 0 | 5  | 1 | 0 | 50 | 67  | 22978376 | 9.53E-02 | 1 |
| FBXO43   | 810757  | 396  | 25  | 1804920  | 488076  | 0 | 11 | 2 | 0 | 50 | 67  | 28712824 | 9.55E-02 | 1 |
| ARPP19   | 469724  | 386  | 15  | 293344   | 77252   | 0 | 2  | 0 | 0 | 50 | 61  | 19857324 | 9.57E-02 | 1 |
| RBM18    | 319049  | 597  | 19  | 499468   | 133856  | 0 | 2  | 0 | 0 | 50 | 39  | 24640896 | 9.61E-02 | 1 |
| ELOVL7   | 188782  | 596  | 4   | 752584   | 180848  | 0 | 4  | 1 | 0 | 50 | 50  | 17872980 | 9.64E-02 | 1 |
| PRH1     | NaN     | NaN  | NaN | 425420   | 131008  | 0 | 3  | 1 | 0 | 50 | 117 | 39776592 | 9.64E-02 | 1 |
| FAP      | 70846   | 615  | 5   | 2052340  | 492704  | 0 | 11 | 0 | 0 | 22 | 37  | 12327924 | 9.66E-02 | 1 |
| FAT1     | 351973  | 513  | -13 | 11525144 | 3289084 | 0 | 40 | 9 | 0 | 8  | 21  | 5948760  | 9.66E-02 | 1 |
| DHX30    | 843941  | 197  | 34  | 3001080  | 929160  | 0 | 9  | 2 | 0 | 19 | 19  | 8445388  | 9.69E-02 | 1 |
| HIST1H2B | 390169  | 544  | 57  | 312212   | 96832   | 0 | 6  | 2 | 0 | 15 | 17  | 2533296  | 9.69E-02 | 1 |
| LARP4B   | 378329  | 515  | 9   | 1895700  | 542544  | 0 | 7  | 2 | 0 | 50 | 47  | 18497404 | 9.69E-02 | 1 |
| UCHL3    | 197113  | 362  | 37  | 623000   | 153436  | 0 | 4  | 0 | 0 | 50 | 50  | 20555084 | 9.71E-02 | 1 |
| CCDC92   | 903375  | 539  | 36  | 839092   | 241724  | 0 | 5  | 1 | 0 | 50 | 46  | 18738416 | 9.72E-02 | 1 |
| IFIT2    | 253000  | 263  | 27  | 1209688  | 310076  | 0 | 5  | 0 | 0 | 50 | 59  | 19597800 | 9.73E-02 | 1 |
| CTNND1   | 921177  | 497  | 8   | 2485948  | 699896  | 0 | 7  | 0 | 0 | 9  | 3   | 2826640  | 9.74E-02 | 1 |
| ST3GAL6  | 338260  | 516  | 10  | 881100   | 221076  | 0 | 5  | 1 | 0 | 50 | 47  | 21678264 | 9.77E-02 | 1 |
| PSMA8    | 168448  | 577  | 57  | 672484   | 176576  | 0 | 5  | 0 | 0 | 50 | 53  | 16561120 | 9.78E-02 | 1 |
| TGFBR1   | 201435  | 211  | 30  | 1294772  | 356356  | 0 | 7  | 2 | 0 | 50 | 60  | 19817096 | 9.78E-02 | 1 |
| GFM1     | 197292  | 890  | -9  | 1948388  | 535780  | 0 | 9  | 1 | 0 | 50 | 86  | 29038208 | 9.79E-02 | 1 |
| ASPSCR1  | 3814891 | 211  | 28  | 1408692  | 434676  | 0 | 5  | 2 | 0 | 32 | 25  | 10015348 | 9.83E-02 | 1 |
| MFF      | 251488  | 144  | 18  | 877896   | 255252  | 0 | 4  | 1 | 0 | 50 | 39  | 21090864 | 9.83E-02 | 1 |
| DHX15    | 194657  | 491  | 35  | 2045576  | 560344  | 0 | 11 | 3 | 0 | 50 | 66  | 20769752 | 9.84E-02 | 1 |
| SLFN11   | 761918  | 456  | 11  | 2280180  | 626916  | 0 | 11 | 0 | 0 | 5  | 2   | 2080464  | 9.84E-02 | 1 |

|          |         |     |     |         |         |   |    |   |   |    |     |          |          |   |
|----------|---------|-----|-----|---------|---------|---|----|---|---|----|-----|----------|----------|---|
| BANP     | 639210  | 231 | 31  | 1390892 | 385192  | 0 | 6  | 0 | 0 | 4  | 1   | 1412608  | 9.85E-02 | 1 |
| KLHL12   | 422793  | 318 | 28  | 1467788 | 402280  | 0 | 5  | 0 | 0 | 24 | 6   | 8926344  | 9.86E-02 | 1 |
| TEX14    | 735964  | 268 | 13  | 3893928 | 1022076 | 0 | 16 | 3 | 0 | 8  | 6   | 4752956  | 9.86E-02 | 1 |
| ZSWIM2   | 278175  | 629 | -5  | 1655044 | 412604  | 0 | 9  | 2 | 0 | 19 | 21  | 9005376  | 9.87E-02 | 1 |
| SRI      | 157359  | 454 | 23  | 543256  | 137060  | 0 | 2  | 1 | 0 | 38 | 39  | 14524800 | 9.88E-02 | 1 |
| REEP3    | 207194  | 412 | 22  | 672484  | 177644  | 0 | 3  | 0 | 0 | 44 | 48  | 18744468 | 9.88E-02 | 1 |
| TMEM71   | 166227  | 872 | -6  | 788184  | 198648  | 0 | 5  | 0 | 0 | 50 | 56  | 21469648 | 9.89E-02 | 1 |
| C15orf52 | 872646  | 184 | 42  | 1346392 | 412604  | 0 | 7  | 2 | 0 | 50 | 55  | 20353232 | 9.89E-02 | 1 |
| NFE2L3   | 910990  | 445 | 39  | 1737636 | 501960  | 0 | 9  | 1 | 0 | 24 | 16  | 8865112  | 9.90E-02 | 1 |
| C7orf33  | 473795  | 593 | -4  | 440728  | 138128  | 0 | 3  | 0 | 0 | 50 | 62  | 20687160 | 9.90E-02 | 1 |
| VEGFA    | 1564130 | 278 | 41  | 1071204 | 307584  | 0 | 4  | 0 | 0 | 50 | 57  | 21752668 | 9.91E-02 | 1 |
| GPR141   | 103891  | 630 | 6   | 764688  | 215736  | 0 | 8  | 0 | 0 | 50 | 75  | 22283464 | 9.91E-02 | 1 |
| FAM83G   | NaN     | NaN | NaN | 2028844 | 628340  | 0 | 12 | 1 | 0 | 50 | 117 | 40273924 | 9.92E-02 | 1 |
| HNRNPA3  | 374611  | 145 | 30  | 992172  | 264864  | 0 | 7  | 0 | 0 | 21 | 19  | 9840196  | 9.92E-02 | 1 |
| SULF1    | 137404  | 578 | -19 | 2306524 | 568532  | 0 | 12 | 0 | 0 | 7  | 6   | 4212548  | 9.92E-02 | 1 |
| CPA4     | 424934  | 212 | 30  | 1106448 | 290496  | 0 | 6  | 1 | 0 | 35 | 41  | 14766880 | 9.93E-02 | 1 |
| RNF112   | 588566  | 414 | 6   | 1354936 | 415808  | 0 | 9  | 3 | 0 | 6  | 8   | 3064804  | 9.93E-02 | 1 |
| SULT1C4  | 361799  | 483 | -2  | 811680  | 184764  | 0 | 4  | 1 | 0 | 50 | 72  | 23161004 | 9.94E-02 | 1 |
| C1orf54  | 1213150 | 197 | 38  | 357424  | 89000   | 0 | 4  | 0 | 0 | 50 | 58  | 21071640 | 9.96E-02 | 1 |
| CD200    | 260383  | 621 | 20  | 753296  | 217516  | 0 | 5  | 0 | 0 | 3  | 0   | 1109296  | 9.98E-02 | 1 |
| MGAT1    | 830596  | 566 | 25  | 1079036 | 349948  | 0 | 9  | 1 | 0 | 50 | 93  | 28405240 | 9.99E-02 | 1 |
| LARP4    | 855863  | 125 | 41  | 1886444 | 502672  | 0 | 8  | 2 | 0 | 50 | 54  | 24607076 | 9.99E-02 | 1 |
| CORO1A   | NaN     | NaN | NaN | 1168392 | 353508  | 0 | 7  | 2 | 0 | 50 | 118 | 39999092 | 1.00E-01 | 1 |
| BSX      | 698665  | 416 | 8   | 572804  | 184408  | 0 | 4  | 0 | 0 | 50 | 44  | 16918900 | 1.00E-01 | 1 |
| TNNI1    | 857879  | 209 | 26  | 494128  | 138128  | 0 | 5  | 0 | 0 | 50 | 50  | 16783264 | 1.00E-01 | 1 |
| SPATA12  | 418332  | 332 | 46  | 465292  | 146672  | 0 | 3  | 0 | 0 | 50 | 52  | 20246076 | 1.00E-01 | 1 |
| C12orf5  | 295315  | 860 | 33  | 702744  | 189036  | 0 | 4  | 0 | 0 | 50 | 40  | 17136416 | 1.00E-01 | 1 |
| ADIPOR1  | 421206  | 389 | 30  | 960844  | 273764  | 0 | 7  | 1 | 0 | 48 | 58  | 18106160 | 1.00E-01 | 1 |
| ZNF35    | 434068  | 541 | 34  | 1356716 | 343540  | 0 | 10 | 0 | 0 | 11 | 9   | 4909596  | 1.00E-01 | 1 |
| CNTNAP4  | 11522   | 975 | -26 | 3401580 | 904596  | 0 | 18 | 3 | 0 | 21 | 34  | 11094028 | 1.01E-01 | 1 |
| MSC      | 25834   | 905 | 6   | 499468  | 168032  | 0 | 4  | 1 | 0 | 37 | 37  | 15161328 | 1.01E-01 | 1 |
| COIL     | 333715  | 254 | -10 | 1459600 | 416876  | 0 | 5  | 0 | 0 | 50 | 46  | 20300900 | 1.01E-01 | 1 |
| FXVD6    | 473498  | 601 | 41  | 273408  | 64080   | 0 | 2  | 0 | 0 | 50 | 83  | 23683612 | 1.01E-01 | 1 |

|          |         |     |     |         |        |   |    |   |   |    |    |          |          |   |
|----------|---------|-----|-----|---------|--------|---|----|---|---|----|----|----------|----------|---|
| PLEK     | 208260  | 586 | 23  | 932008  | 226772 | 0 | 5  | 1 | 0 | 50 | 50 | 21405212 | 1.01E-01 | 1 |
| GNG11    | 228127  | 480 | -12 | 195088  | 46280  | 0 | 1  | 0 | 0 | 50 | 63 | 21073420 | 1.02E-01 | 1 |
| CGA      | 209764  | 625 | -3  | 306872  | 80812  | 0 | 2  | 0 | 0 | 50 | 50 | 20723116 | 1.02E-01 | 1 |
| PRKCQ    | 235334  | 561 | 7   | 1887156 | 450696 | 0 | 8  | 1 | 0 | 50 | 62 | 22975884 | 1.02E-01 | 1 |
| ZRANB1   | 287282  | 361 | 22  | 1819516 | 486296 | 0 | 10 | 0 | 0 | 27 | 27 | 13358900 | 1.02E-01 | 1 |
| MEP1A    | 137754  | 431 | 2   | 1959424 | 491636 | 0 | 6  | 2 | 0 | 25 | 19 | 7767920  | 1.02E-01 | 1 |
| POT1     | 34691   | 524 | -16 | 1662520 | 436100 | 0 | 13 | 1 | 0 | 50 | 75 | 22637684 | 1.02E-01 | 1 |
| PRDX4    | 494082  | NaN | 35  | 694556  | 206836 | 0 | 5  | 0 | 0 | 50 | 68 | 21432980 | 1.02E-01 | 1 |
| CEACAM2  | 1044508 | 451 | 31  | 751872  | 215736 | 0 | 6  | 0 | 0 | 50 | 62 | 20279540 | 1.02E-01 | 1 |
| NUPL2    | 509506  | 218 | 23  | 1077968 | 306160 | 0 | 8  | 1 | 0 | 50 | 52 | 17724172 | 1.02E-01 | 1 |
| C1orf112 | 212980  | 614 | 8   | 2241732 | 590604 | 0 | 8  | 2 | 0 | 43 | 44 | 19315848 | 1.02E-01 | 1 |
| HOOK1    | 59567   | 747 | -3  | 1969392 | 456036 | 0 | 6  | 0 | 0 | 34 | 36 | 18682880 | 1.03E-01 | 1 |
| AXIN2    | 212714  | 773 | -26 | 2130304 | 612320 | 0 | 15 | 2 | 0 | 50 | 87 | 21610980 | 1.03E-01 | 1 |
| GPR6     | 209151  | 624 | 13  | 846924  | 318264 | 0 | 6  | 1 | 0 | 50 | 63 | 24306968 | 1.03E-01 | 1 |
| HMOX2    | 751633  | 160 | 39  | 821648  | 215380 | 0 | 4  | 1 | 0 | 50 | 50 | 17444712 | 1.03E-01 | 1 |
| PDSS2    | 235480  | 588 | 33  | 1023500 | 288004 | 0 | 7  | 1 | 0 | 50 | 45 | 21604572 | 1.03E-01 | 1 |
| GOLIM4   | 147581  | 681 | -8  | 1869356 | 427912 | 0 | 8  | 1 | 0 | 50 | 63 | 26573620 | 1.03E-01 | 1 |
| TAS2R60  | 371260  | 379 | 1   | 782844  | 238164 | 0 | 5  | 1 | 0 | 50 | 51 | 20287016 | 1.03E-01 | 1 |
| CBFA2T2  | 613808  | 148 | 52  | 1567824 | 451764 | 0 | 12 | 3 | 0 | 45 | 60 | 15730928 | 1.03E-01 | 1 |
| ARL6     | 89238   | 731 | -5  | 506944  | 122108 | 0 | 2  | 0 | 0 | 50 | 55 | 23802160 | 1.03E-01 | 1 |
| ZDHHC6   | 197289  | 325 | 3   | 1098616 | 266288 | 0 | 4  | 0 | 0 | 50 | 44 | 20520196 | 1.03E-01 | 1 |
| RWDD1    | 254581  | 479 | 14  | 661804  | 145604 | 0 | 4  | 0 | 0 | 50 | 42 | 18121112 | 1.03E-01 | 1 |
| GPD1L    | 466186  | 403 | 6   | 904952  | 252760 | 0 | 5  | 1 | 0 | 50 | 56 | 24088028 | 1.04E-01 | 1 |
| TPT1     | 680643  | 296 | 78  | 471700  | 106088 | 0 | 3  | 0 | 0 | 50 | 51 | 21491720 | 1.04E-01 | 1 |
| CDO1     | 384075  | 759 | 1   | 530796  | 130296 | 0 | 3  | 0 | 0 | 50 | 61 | 23231848 | 1.04E-01 | 1 |
| IFNGR2   | 868693  | 182 | 68  | 862944  | 245640 | 0 | 5  | 0 | 0 | 19 | 14 | 6984364  | 1.04E-01 | 1 |
| TIFAB    | 625030  | 509 | 47  | 388040  | 135280 | 0 | 2  | 0 | 0 | 50 | 53 | 24138580 | 1.04E-01 | 1 |
| C11orf71 | 157610  | 477 | -8  | 358848  | 121752 | 0 | 2  | 0 | 0 | 50 | 63 | 23313372 | 1.04E-01 | 1 |
| VIT      | 577288  | 323 | -8  | 1884308 | 534712 | 0 | 12 | 2 | 0 | 50 | 61 | 20722760 | 1.04E-01 | 1 |
| RFC4     | 449980  | 384 | 25  | 951232  | 262016 | 0 | 7  | 1 | 0 | 50 | 53 | 20002928 | 1.04E-01 | 1 |
| RAB8B    | 451708  | 214 | 44  | 559276  | 139196 | 0 | 3  | 1 | 0 | 50 | 44 | 17735564 | 1.05E-01 | 1 |
| EZR      | 564251  | 163 | 55  | 1550024 | 386260 | 0 | 8  | 1 | 0 | 50 | 70 | 19554724 | 1.05E-01 | 1 |
| SMARCA1  | 278446  | NaN | -7  | 2781784 | 700964 | 0 | 7  | 1 | 0 | 9  | 11 | 4876844  | 1.05E-01 | 1 |

|          |         |      |     |         |         |   |    |   |   |    |     |          |          |   |
|----------|---------|------|-----|---------|---------|---|----|---|---|----|-----|----------|----------|---|
| DZIP1    | 229772  | 438  | 45  | 2295844 | 566396  | 0 | 13 | 3 | 0 | 50 | 67  | 23081972 | 1.05E-01 | 1 |
| HTR2B    | NaN     | NaN  | NaN | 1197584 | 355288  | 0 | 6  | 1 | 0 | 50 | 117 | 40000872 | 1.05E-01 | 1 |
| PRUNE    | 1617972 | 165  | 35  | 1143472 | 341048  | 0 | 9  | 1 | 0 | 18 | 28  | 7487036  | 1.05E-01 | 1 |
| ARMC3    | 164960  | 449  | 12  | 2269144 | 603776  | 0 | 12 | 2 | 0 | 50 | 55  | 20417668 | 1.05E-01 | 1 |
| ZNF502   | 433000  | 541  | 28  | 1417236 | 337488  | 0 | 9  | 0 | 0 | 40 | 36  | 15331140 | 1.05E-01 | 1 |
| SNRPA    | 1127178 | 201  | 27  | 725528  | 202564  | 0 | 7  | 2 | 0 | 8  | 14  | 2966192  | 1.05E-01 | 1 |
| HTN1     | 59679   | 975  | 3   | 174796  | 32396   | 0 | 2  | 0 | 0 | 50 | 56  | 23451500 | 1.06E-01 | 1 |
| FUT5     | 1217326 | 294  | 35  | 923820  | 281952  | 0 | 5  | 0 | 0 | 50 | 56  | 18189820 | 1.06E-01 | 1 |
| CARHSP1  | 401329  | 247  | 5   | 365968  | 121040  | 0 | 2  | 0 | 0 | 50 | 59  | 23017180 | 1.06E-01 | 1 |
| HOXA6    | 356045  | 385  | 28  | 589180  | 164828  | 0 | 5  | 1 | 0 | 9  | 4   | 2886804  | 1.06E-01 | 1 |
| CDH1     | 924096  | 240  | 30  | 2241376 | 651836  | 0 | 8  | 3 | 0 | 50 | 54  | 18167036 | 1.06E-01 | 1 |
| IL33     | 355118  | 432  | 5   | 726952  | 169100  | 0 | 6  | 0 | 0 | 50 | 47  | 16560052 | 1.06E-01 | 1 |
| SF3B1    | 736523  | 276  | 30  | 3379152 | 930228  | 0 | 17 | 1 | 0 | 12 | 12  | 6941644  | 1.06E-01 | 1 |
| CXCL17   | 704668  | 235  | 34  | 318264  | 79032   | 0 | 2  | 0 | 0 | 50 | 55  | 18620580 | 1.06E-01 | 1 |
| TMEM143  | 1478750 | 217  | 36  | 1129232 | 376648  | 0 | 7  | 1 | 0 | 50 | 89  | 31278516 | 1.06E-01 | 1 |
| HSPB3    | 61471   | 617  | 14  | 370240  | 113564  | 0 | 3  | 0 | 0 | 50 | 61  | 22644804 | 1.06E-01 | 1 |
| HIST1H4J | 267617  | 634  | 32  | 248844  | 86508   | 0 | 2  | 0 | 0 | 50 | 56  | 15505936 | 1.06E-01 | 1 |
| RNASE10  | 464497  | 395  | 17  | 547884  | 146316  | 0 | 2  | 0 | 0 | 50 | 58  | 21385632 | 1.07E-01 | 1 |
| TSPAN18  | 174144  | 622  | 15  | 639732  | 187968  | 0 | 3  | 0 | 0 | 50 | 60  | 17878676 | 1.07E-01 | 1 |
| NOP10    | 542657  | 234  | 22  | 169100  | 45568   | 0 | 2  | 0 | 0 | 50 | 46  | 18844148 | 1.07E-01 | 1 |
| CCND3    | 467876  | 186  | 41  | 724460  | 231400  | 0 | 5  | 2 | 0 | 48 | 56  | 17186256 | 1.07E-01 | 1 |
| SLC23A3  | 773232  | 177  | 36  | 1559636 | 470632  | 0 | 9  | 0 | 0 | 12 | 9   | 4375240  | 1.07E-01 | 1 |
| CD244    | 1118846 | 583  | 28  | 969388  | 253472  | 0 | 7  | 0 | 0 | 50 | 65  | 17825632 | 1.07E-01 | 1 |
| LAX1     | 515575  | 280  | 39  | 1056608 | 284800  | 0 | 7  | 0 | 0 | 37 | 25  | 12651528 | 1.07E-01 | 1 |
| GJA9     | 524940  | 458  | 24  | 1295484 | 362052  | 0 | 7  | 0 | 0 | 39 | 34  | 14577132 | 1.07E-01 | 1 |
| CTXN3    | 284904  | 682  | 29  | 204700  | 62300   | 0 | 1  | 0 | 0 | 50 | 46  | 22653348 | 1.08E-01 | 1 |
| SLIT2    | 44181   | 1366 | 3   | 4021732 | 1034180 | 0 | 12 | 0 | 0 | 5  | 1   | 3562136  | 1.08E-01 | 1 |
| MPZ      | 735152  | 293  | 41  | 632968  | 188324  | 0 | 3  | 0 | 0 | 50 | 46  | 22289160 | 1.08E-01 | 1 |
| CUTC     | 709789  | 139  | 18  | 709508  | 202564  | 0 | 5  | 0 | 0 | 50 | 46  | 22013972 | 1.08E-01 | 1 |
| TECR     | 1008795 | 204  | 26  | 823784  | 217516  | 0 | 3  | 1 | 0 | 50 | 74  | 20546896 | 1.08E-01 | 1 |
| CARD6    | 212186  | 526  | 19  | 2613040 | 723392  | 0 | 10 | 3 | 0 | 50 | 42  | 19365688 | 1.09E-01 | 1 |
| GCSH     | 287527  | 327  | 13  | 447136  | 129584  | 0 | 2  | 0 | 0 | 50 | 44  | 21348252 | 1.09E-01 | 1 |
| ELMO1    | 63863   | 859  | 16  | 1945896 | 476328  | 0 | 10 | 1 | 0 | 50 | 61  | 20144616 | 1.09E-01 | 1 |



|         |         |     |     |         |         |   |    |   |   |    |    |          |          |   |
|---------|---------|-----|-----|---------|---------|---|----|---|---|----|----|----------|----------|---|
| APC     | 247811  | 399 | 28  | 7178028 | 1998228 | 0 | 22 | 4 | 0 | 50 | 56 | 24417328 | 1.09E-01 | 1 |
| NDN     | 59699   | 961 | -58 | 791032  | 242792  | 0 | 3  | 1 | 0 | 45 | 38 | 14448972 | 1.09E-01 | 1 |
| GIF     | 366560  | 494 | 8   | 1075832 | 299752  | 0 | 4  | 2 | 0 | 50 | 49 | 19554724 | 1.09E-01 | 1 |
| RND1    | 1655612 | 214 | 57  | 596656  | 168032  | 0 | 4  | 1 | 0 | 50 | 64 | 19943476 | 1.09E-01 | 1 |
| EDA     | 135563  | NaN | -2  | 1090428 | 336420  | 0 | 5  | 0 | 0 | 24 | 23 | 14862288 | 1.09E-01 | 1 |
| FTL     | 1927185 | 211 | 43  | 452476  | 124244  | 0 | 3  | 0 | 0 | 50 | 57 | 20562560 | 1.09E-01 | 1 |
| IKZF3   | 1607516 | 292 | 26  | 1344612 | 321468  | 0 | 5  | 0 | 0 | 15 | 9  | 5823448  | 1.10E-01 | 1 |
| SOCS6   | 64018   | 264 | 7   | 1332152 | 385192  | 0 | 7  | 2 | 0 | 44 | 46 | 19295200 | 1.10E-01 | 1 |
| MPP6    | 254420  | 405 | 18  | 1412964 | 367392  | 0 | 9  | 0 | 0 | 13 | 10 | 5969764  | 1.10E-01 | 1 |
| CNOT1   | 660382  | 191 | 8   | 6340004 | 1713784 | 0 | 19 | 4 | 0 | 7  | 10 | 4862248  | 1.10E-01 | 1 |
| RABEP2  | 1189140 | 257 | 55  | 1436460 | 443220  | 0 | 7  | 1 | 0 | 50 | 73 | 21972320 | 1.10E-01 | 1 |
| CAMTA1  | 289717  | 462 | 23  | 4265236 | 1192244 | 0 | 16 | 5 | 0 | 50 | 74 | 23353956 | 1.10E-01 | 1 |
| MAPK8   | 107152  | 633 | 31  | 1204704 | 297972  | 0 | 4  | 0 | 0 | 50 | 39 | 23296996 | 1.10E-01 | 1 |
| NSUN6   | 74263   | 512 | -4  | 1216096 | 332504  | 0 | 8  | 0 | 0 | 14 | 21 | 8690316  | 1.10E-01 | 1 |
| SPDYE1  | 1042621 | 239 | 49  | 880032  | 225348  | 0 | 4  | 0 | 0 | 50 | 57 | 19388116 | 1.10E-01 | 1 |
| SKIL    | 368934  | 202 | 23  | 1762200 | 453900  | 0 | 10 | 1 | 0 | 30 | 29 | 15265992 | 1.10E-01 | 1 |
| NDUFV2  | 419199  | 391 | 53  | 655396  | 177644  | 0 | 4  | 0 | 0 | 50 | 61 | 21298412 | 1.10E-01 | 1 |
| ZNF623  | 2198262 | 229 | 33  | 1371668 | 351016  | 0 | 10 | 1 | 0 | 46 | 47 | 19989044 | 1.10E-01 | 1 |
| GYPB    | 146672  | 990 | -12 | 245996  | 67996   | 0 | 2  | 0 | 0 | 50 | 58 | 19488152 | 1.10E-01 | 1 |
| UTP14C  | 385945  | 461 | 41  | 1931300 | 526168  | 0 | 8  | 3 | 0 | 15 | 19 | 7166636  | 1.11E-01 | 1 |
| SLC29A4 | 1791782 | 289 | 11  | 1328592 | 418656  | 0 | 7  | 1 | 0 | 13 | 15 | 8217192  | 1.11E-01 | 1 |
| RIPPLY2 | 108781  | 870 | -22 | 337844  | 88288   | 0 | 4  | 0 | 0 | 50 | 68 | 20592108 | 1.11E-01 | 1 |
| MRPL44  | 314020  | 346 | 23  | 838380  | 243504  | 0 | 5  | 0 | 0 | 50 | 48 | 22850572 | 1.11E-01 | 1 |
| RNF182  | 256934  | 590 | 20  | 609116  | 185476  | 0 | 3  | 0 | 0 | 37 | 21 | 15932068 | 1.11E-01 | 1 |
| MBD6    | 1347795 | 303 | 44  | 2369536 | 894272  | 0 | 15 | 4 | 0 | 40 | 78 | 26763012 | 1.11E-01 | 1 |
| GTSF1   | 642618  | 190 | 38  | 469564  | 102884  | 0 | 2  | 0 | 0 | 50 | 46 | 21238248 | 1.11E-01 | 1 |
| LMAN2L  | 921353  | 219 | 45  | 933788  | 255964  | 0 | 5  | 0 | 0 | 29 | 30 | 14102940 | 1.11E-01 | 1 |
| RNF2    | 346010  | 458 | -1  | 886440  | 218940  | 0 | 4  | 0 | 0 | 50 | 67 | 23809992 | 1.12E-01 | 1 |
| CCDC23  | 820426  | 426 | 30  | 182628  | 40584   | 0 | 1  | 0 | 0 | 50 | 65 | 22644448 | 1.12E-01 | 1 |
| PPP1R11 | 1820240 | 496 | 30  | 320044  | 95408   | 0 | 2  | 0 | 0 | 50 | 54 | 18891140 | 1.12E-01 | 1 |
| ATOX1   | 584468  | 406 | 46  | 188680  | 47348   | 0 | 1  | 0 | 0 | 50 | 66 | 24436196 | 1.12E-01 | 1 |
| DGKA    | 2080397 | 229 | 31  | 1948388 | 508012  | 0 | 6  | 3 | 0 | 11 | 12 | 5452140  | 1.12E-01 | 1 |
| PRAME   | 190814  | 641 | 23  | 1278396 | 377004  | 0 | 5  | 2 | 0 | 50 | 48 | 19743048 | 1.12E-01 | 1 |

|           |         |     |     |         |        |   |    |   |   |    |     |          |          |   |
|-----------|---------|-----|-----|---------|--------|---|----|---|---|----|-----|----------|----------|---|
| AIM1L     | 1021101 | 217 | 22  | 1592388 | 452832 | 0 | 10 | 0 | 0 | 6  | 1   | 1611612  | 1.12E-01 | 1 |
| PROL1     | 264684  | 915 | 25  | 602708  | 203632 | 0 | 3  | 0 | 0 | 50 | 42  | 17431540 | 1.13E-01 | 1 |
| FGFBRAP1  | 191525  | 381 | 4   | 2180856 | 627984 | 0 | 8  | 3 | 0 | 50 | 40  | 19769036 | 1.13E-01 | 1 |
| XRCC2     | 256955  | 444 | 6   | 719476  | 191528 | 0 | 4  | 0 | 0 | 50 | 42  | 19305880 | 1.13E-01 | 1 |
| SAP18     | 447305  | 240 | 43  | 443576  | 125668 | 0 | 4  | 0 | 0 | 50 | 47  | 18943116 | 1.13E-01 | 1 |
| TRA2A     | 432206  | 231 | 23  | 719476  | 217160 | 0 | 4  | 0 | 0 | 50 | 44  | 18255324 | 1.13E-01 | 1 |
| SORCS1    | 6116    | 881 | -26 | 3194744 | 907444 | 0 | 18 | 5 | 0 | 50 | 90  | 21258184 | 1.13E-01 | 1 |
| ITLN2     | 777836  | 441 | 19  | 855824  | 220720 | 0 | 4  | 1 | 0 | 50 | 69  | 22066304 | 1.14E-01 | 1 |
| ZFP2      | 95669   | 845 | 10  | 1195804 | 288716 | 0 | 6  | 0 | 0 | 40 | 55  | 18453972 | 1.14E-01 | 1 |
| ZNF569    | 234564  | 939 | -52 | 1805632 | 412604 | 0 | 8  | 2 | 0 | 48 | 51  | 15925304 | 1.14E-01 | 1 |
| MTHFD1L   | 341712  | 438 | 21  | 2519056 | 733004 | 0 | 10 | 1 | 0 | 24 | 25  | 11947716 | 1.14E-01 | 1 |
| GHRHR     | 390101  | 631 | 4   | 1129588 | 325028 | 0 | 5  | 2 | 0 | 44 | 66  | 19025352 | 1.14E-01 | 1 |
| YWHAQ     | 700762  | 154 | 40  | 642224  | 167320 | 0 | 4  | 1 | 0 | 46 | 46  | 17670416 | 1.15E-01 | 1 |
| C14orf2   | 694566  | 320 | 33  | 210396  | 45924  | 0 | 1  | 0 | 0 | 50 | 55  | 25165284 | 1.15E-01 | 1 |
| NUDC      | 1025094 | 188 | 34  | 878608  | 219296 | 0 | 4  | 2 | 0 | 15 | 21  | 6155240  | 1.15E-01 | 1 |
| SPARCL1   | 526761  | 537 | 16  | 1761132 | 412248 | 0 | 8  | 1 | 0 | 50 | 65  | 20563984 | 1.15E-01 | 1 |
| CDHR5     | 1774224 | 236 | 57  | 2079396 | 690996 | 0 | 12 | 2 | 0 | 50 | 45  | 17867640 | 1.15E-01 | 1 |
| DPYS      | 39710   | 972 | 15  | 1320404 | 384124 | 0 | 10 | 3 | 0 | 29 | 46  | 13340744 | 1.15E-01 | 1 |
| MAS1L     | 404210  | 854 | 21  | 932720  | 279460 | 0 | 4  | 1 | 0 | 50 | 48  | 16616300 | 1.16E-01 | 1 |
| RAB11B    | 726988  | 204 | 0   | 564260  | 156640 | 0 | 3  | 0 | 0 | 50 | 52  | 20477120 | 1.16E-01 | 1 |
| DCPS      | 367696  | 426 | 30  | 855112  | 249200 | 0 | 5  | 1 | 0 | 18 | 19  | 8476360  | 1.16E-01 | 1 |
| IIST1H2BC | 228884  | 634 | 40  | 315060  | 96120  | 0 | 2  | 0 | 0 | 50 | 48  | 14804260 | 1.16E-01 | 1 |
| CROT      | 222199  | 876 | 3   | 1694204 | 432184 | 0 | 8  | 2 | 0 | 38 | 52  | 15591376 | 1.16E-01 | 1 |
| MFSD11    | 827288  | 206 | 22  | 1181920 | 315416 | 0 | 6  | 2 | 0 | 50 | 41  | 14517680 | 1.16E-01 | 1 |
| PIBF1     | 258763  | 533 | 30  | 2018520 | 482736 | 0 | 12 | 1 | 0 | 50 | 81  | 24135020 | 1.16E-01 | 1 |
| CLDN17    | 10231   | 994 | -69 | 549308  | 175864 | 0 | 5  | 1 | 0 | 50 | 68  | 13239640 | 1.17E-01 | 1 |
| ERP29     | 812811  | 317 | 45  | 662160  | 185832 | 0 | 7  | 0 | 0 | 50 | 88  | 27070596 | 1.17E-01 | 1 |
| IGFL3     | 1177162 | 249 | 28  | 331080  | 87576  | 0 | 2  | 1 | 0 | 15 | 12  | 5112872  | 1.17E-01 | 1 |
| ZNRF2     | 626711  | 388 | 42  | 603776  | 191884 | 0 | 2  | 0 | 0 | 50 | 64  | 24160652 | 1.17E-01 | 1 |
| CYP2R1    | 353856  | 596 | -13 | 1276260 | 349236 | 0 | 5  | 0 | 0 | 8  | 1   | 2338564  | 1.18E-01 | 1 |
| GJA5      | NaN     | NaN | NaN | 888576  | 265932 | 0 | 5  | 1 | 0 | 50 | 117 | 39911516 | 1.18E-01 | 1 |
| MAD2L1B1  | 1424296 | 166 | 44  | 808120  | 241724 | 0 | 6  | 0 | 0 | 50 | 77  | 23797532 | 1.18E-01 | 1 |
| GDF6      | 215566  | 720 | -7  | 1103600 | 363832 | 0 | 4  | 0 | 0 | 20 | 17  | 11374200 | 1.18E-01 | 1 |

|           |         |      |     |         |         |   |    |   |   |    |     |          |          |   |
|-----------|---------|------|-----|---------|---------|---|----|---|---|----|-----|----------|----------|---|
| UBXN4     | 511712  | 403  | 25  | 1332864 | 349236  | 0 | 5  | 0 | 0 | 12 | 5   | 4843736  | 1.18E-01 | 1 |
| BTBD2     | 1899295 | 239  | 37  | 1306164 | 413316  | 0 | 6  | 1 | 0 | 50 | 67  | 24113304 | 1.18E-01 | 1 |
| MBLAC1    | 1299015 | 205  | 52  | 621220  | 238520  | 0 | 4  | 0 | 0 | 50 | 42  | 20842020 | 1.19E-01 | 1 |
| PTN       | 189251  | 879  | -26 | 449272  | 108224  | 0 | 4  | 0 | 0 | 50 | 83  | 20214392 | 1.19E-01 | 1 |
| CAPSL     | 138289  | 614  | 0   | 548240  | 136348  | 0 | 5  | 0 | 0 | 50 | 43  | 19196944 | 1.19E-01 | 1 |
| KRTAP12-  | 819099  | 391  | 35  | 239944  | 72980   | 0 | 1  | 0 | 0 | 50 | 61  | 23447584 | 1.19E-01 | 1 |
| TMCO6     | 774470  | 356  | 31  | 1237456 | 394448  | 0 | 4  | 3 | 0 | 50 | 59  | 20786128 | 1.19E-01 | 1 |
| IGSF11    | 197243  | 714  | 3   | 1127096 | 341404  | 0 | 5  | 2 | 0 | 50 | 68  | 24048512 | 1.20E-01 | 1 |
| ZNF548    | 451095  | 869  | -24 | 1423288 | 338912  | 0 | 10 | 1 | 0 | 50 | 68  | 17938840 | 1.20E-01 | 1 |
| ARPC4     | 953772  | 264  | 43  | 451052  | 111784  | 0 | 3  | 0 | 0 | 50 | 72  | 27173124 | 1.20E-01 | 1 |
| DDX5      | 1171555 | 184  | 15  | 1602712 | 419012  | 0 | 8  | 1 | 0 | 23 | 22  | 8280916  | 1.20E-01 | 1 |
| DNM2      | 2114424 | 208  | 31  | 2356008 | 672840  | 0 | 11 | 3 | 0 | 9  | 12  | 5271292  | 1.20E-01 | 1 |
| C5orf58   | 97631   | 636  | 31  | 275544  | 67284   | 0 | 2  | 1 | 0 | 8  | 4   | 1936284  | 1.20E-01 | 1 |
| BAZ2B     | 351229  | 414  | 23  | 5621596 | 1477400 | 0 | 21 | 1 | 0 | 2  | 2   | 2702396  | 1.21E-01 | 1 |
| ZNF470    | 135553  | 817  | -69 | 1862236 | 455324  | 0 | 8  | 0 | 0 | 14 | 16  | 7903912  | 1.21E-01 | 1 |
| LANCL2    | 752223  | 455  | 7   | 1151304 | 327876  | 0 | 5  | 1 | 0 | 50 | 34  | 15986892 | 1.21E-01 | 1 |
| COG7      | 521590  | 611  | 28  | 1990396 | 548240  | 0 | 6  | 2 | 0 | 21 | 24  | 11306916 | 1.21E-01 | 1 |
| MTA1      | 773175  | 244  | 40  | 1860100 | 519404  | 0 | 5  | 0 | 0 | 15 | 12  | 8390920  | 1.22E-01 | 1 |
| STRA8     | 425774  | 594  | 40  | 865792  | 226772  | 0 | 6  | 1 | 0 | 50 | 71  | 22560076 | 1.22E-01 | 1 |
| BHLHE41   | 151502  | 396  | 15  | 1176580 | 388040  | 0 | 5  | 1 | 0 | 50 | 50  | 17846992 | 1.22E-01 | 1 |
| OR6F1     | 191710  | 995  | -32 | 750092  | 239944  | 0 | 9  | 2 | 0 | 27 | 75  | 17761196 | 1.22E-01 | 1 |
| POLR2I    | 978272  | 326  | 6   | 348168  | 79032   | 0 | 3  | 0 | 0 | 50 | 68  | 15103300 | 1.22E-01 | 1 |
| ATP7B     | 353147  | 461  | 28  | 3683176 | 1099328 | 0 | 9  | 1 | 0 | 12 | 3   | 7052004  | 1.22E-01 | 1 |
| C2orf15   | NaN     | NaN  | NaN | 322180  | 90068   | 0 | 2  | 0 | 0 | 50 | 116 | 39735652 | 1.22E-01 | 1 |
| SERTAD2   | 632067  | 332  | 25  | 775724  | 237808  | 0 | 3  | 0 | 0 | 50 | 44  | 26090884 | 1.22E-01 | 1 |
| HIST1H2BI | 408919  | 685  | 43  | 312924  | 96120   | 0 | 2  | 0 | 0 | 50 | 57  | 16881520 | 1.23E-01 | 1 |
| EAF2      | 474007  | 550  | 30  | 688148  | 171592  | 0 | 4  | 1 | 0 | 50 | 52  | 19828844 | 1.23E-01 | 1 |
| DENND4C   | 499163  | 277  | 13  | 4333944 | 1147032 | 0 | 21 | 0 | 0 | 6  | 5   | 3438248  | 1.23E-01 | 1 |
| POU4F2    | 38882   | 987  | -10 | 1007836 | 310076  | 0 | 6  | 2 | 0 | 50 | 74  | 23513088 | 1.23E-01 | 1 |
| KRTAP5-1  | NaN     | NaN  | NaN | 685300  | 212888  | 0 | 2  | 0 | 0 | 50 | 116 | 39858472 | 1.23E-01 | 1 |
| IQCC      | 1460758 | 218  | 29  | 1377364 | 394448  | 0 | 8  | 1 | 0 | 50 | 52  | 21684672 | 1.24E-01 | 1 |
| SLC26A5   | 355264  | 620  | 17  | 1951592 | 553936  | 0 | 8  | 1 | 0 | 50 | 46  | 20792180 | 1.24E-01 | 1 |
| GLT1D1    | 34971   | 1008 | -16 | 693488  | 194020  | 0 | 5  | 0 | 0 | 50 | 72  | 20243584 | 1.24E-01 | 1 |

|          |         |      |     |         |         |   |    |   |   |    |     |          |          |   |
|----------|---------|------|-----|---------|---------|---|----|---|---|----|-----|----------|----------|---|
| MRPS18C  | 330595  | 378  | 40  | 387328  | 94340   | 0 | 4  | 0 | 0 | 50 | 62  | 20397020 | 1.24E-01 | 1 |
| CUL2     | 209586  | 319  | 7   | 2012112 | 463512  | 0 | 6  | 3 | 0 | 50 | 47  | 19089432 | 1.24E-01 | 1 |
| LCN8     | 1898901 | 190  | 39  | 404416  | 111428  | 0 | 2  | 0 | 0 | 50 | 67  | 24888672 | 1.24E-01 | 1 |
| RPS2     | 1747301 | 183  | 46  | 733360  | 236384  | 0 | 6  | 2 | 0 | 16 | 22  | 6444668  | 1.24E-01 | 1 |
| CELF4    | 55294   | 588  | -11 | 1278752 | 332860  | 0 | 7  | 1 | 0 | 33 | 54  | 17549020 | 1.25E-01 | 1 |
| VPS37B   | 977561  | 184  | 37  | 704524  | 225704  | 0 | 5  | 2 | 0 | 10 | 18  | 4763992  | 1.25E-01 | 1 |
| MXD4     | 836839  | 332  | 29  | 536492  | 159844  | 0 | 4  | 0 | 0 | 50 | 50  | 19201216 | 1.25E-01 | 1 |
| NACA2    | 323585  | 358  | -8  | 536848  | 159488  | 0 | 3  | 0 | 0 | 50 | 34  | 19804636 | 1.25E-01 | 1 |
| FRG2C    | NaN     | NaN  | NaN | 719120  | 202564  | 0 | 5  | 1 | 0 | 50 | 117 | 39848148 | 1.25E-01 | 1 |
| HSPBP1   | 1035412 | 209  | 5   | 900680  | 282664  | 0 | 3  | 0 | 0 | 20 | 16  | 7264180  | 1.25E-01 | 1 |
| HSP90AA1 | 1488666 | 145  | 41  | 2225712 | 560700  | 0 | 13 | 3 | 0 | 50 | 85  | 29412364 | 1.26E-01 | 1 |
| SNX12    | 790100  | NaN  | 37  | 421148  | 118192  | 0 | 2  | 0 | 0 | 50 | 62  | 24805724 | 1.26E-01 | 1 |
| ACSS3    | 26211   | 1037 | -20 | 1760064 | 507300  | 0 | 13 | 2 | 0 | 50 | 86  | 22144268 | 1.26E-01 | 1 |
| ITGA8    | 110825  | 853  | -3  | 2792108 | 742972  | 0 | 16 | 5 | 0 | 37 | 49  | 14263140 | 1.26E-01 | 1 |
| ZFAND5   | 314501  | 333  | 18  | 568888  | 141332  | 0 | 2  | 0 | 0 | 50 | 49  | 26527340 | 1.26E-01 | 1 |
| PRDX1    | 809450  | 176  | 25  | 526524  | 135636  | 0 | 4  | 0 | 0 | 50 | 51  | 21873352 | 1.26E-01 | 1 |
| ASL      | 477708  | 345  | 38  | 1217876 | 340336  | 0 | 6  | 2 | 0 | 18 | 14  | 7568916  | 1.26E-01 | 1 |
| KRTAP9-8 | 996799  | 468  | -7  | 408332  | 106444  | 0 | 3  | 0 | 0 | 50 | 60  | 17141400 | 1.27E-01 | 1 |
| CHD1     | 133125  | 595  | 15  | 4542204 | 1085088 | 0 | 18 | 1 | 0 | 4  | 3   | 2563912  | 1.27E-01 | 1 |
| DPF2     | 4112809 | 242  | 50  | 1035248 | 265576  | 0 | 7  | 0 | 0 | 27 | 30  | 12483852 | 1.27E-01 | 1 |
| PBX2     | 2119974 | 392  | 28  | 1095056 | 320044  | 0 | 9  | 1 | 0 | 50 | 62  | 23774036 | 1.27E-01 | 1 |
| RHO      | 779764  | 210  | 59  | 884660  | 252760  | 0 | 4  | 1 | 0 | 50 | 58  | 19116132 | 1.27E-01 | 1 |
| CENPN    | 231500  | 284  | 4   | 1094344 | 267356  | 0 | 4  | 0 | 0 | 50 | 47  | 21594604 | 1.27E-01 | 1 |
| AMOTL1   | 332670  | 472  | -7  | 2428632 | 688860  | 0 | 8  | 2 | 0 | 50 | 61  | 25749480 | 1.28E-01 | 1 |
| SLC26A8  | 876298  | 407  | 33  | 2501612 | 690640  | 0 | 12 | 1 | 0 | 42 | 46  | 19350024 | 1.28E-01 | 1 |
| BLZF1    | 286300  | 491  | 7   | 1031332 | 283376  | 0 | 7  | 0 | 0 | 7  | 8   | 2818808  | 1.28E-01 | 1 |
| CAB39    | 503356  | 395  | 29  | 912072  | 217872  | 0 | 4  | 0 | 0 | 50 | 74  | 23438328 | 1.28E-01 | 1 |
| RPL5     | 582788  | 274  | 4   | 791388  | 197580  | 0 | 3  | 0 | 0 | 50 | 68  | 24206576 | 1.28E-01 | 1 |
| NOL6     | 1001877 | 166  | 4   | 2865088 | 918836  | 0 | 11 | 4 | 0 | 50 | 43  | 17029972 | 1.28E-01 | 1 |
| CDH8     | 3859    | 1301 | -48 | 2037032 | 568888  | 0 | 14 | 4 | 0 | 10 | 32  | 8423316  | 1.28E-01 | 1 |
| HRH1     | 181134  | 226  | 35  | 1220724 | 347100  | 0 | 9  | 2 | 0 | 50 | 69  | 19331156 | 1.29E-01 | 1 |
| OR4P4    | 1295    | 1091 | -20 | 788184  | 213600  | 0 | 9  | 2 | 0 | 38 | 56  | 13911412 | 1.29E-01 | 1 |
| RAPH1    | 383558  | 333  | 19  | 3247076 | 997156  | 0 | 9  | 1 | 0 | 21 | 13  | 10516952 | 1.29E-01 | 1 |

|          |         |      |     |         |        |   |    |   |   |    |     |          |          |   |
|----------|---------|------|-----|---------|--------|---|----|---|---|----|-----|----------|----------|---|
| PCDHGA7  | NaN     | NaN  | NaN | 2304388 | 727664 | 0 | 10 | 1 | 0 | 50 | 117 | 40373248 | 1.29E-01 | 1 |
| ZZZ3     | 491029  | 297  | 0   | 2336428 | 606980 | 0 | 11 | 4 | 0 | 35 | 48  | 15649760 | 1.29E-01 | 1 |
| GABPA    | 534601  | 728  | 31  | 1188328 | 307940 | 0 | 4  | 1 | 0 | 38 | 14  | 10888616 | 1.30E-01 | 1 |
| MUC4     | 920866  | 365  | 49  | 3022796 | 846568 | 0 | 22 | 4 | 0 | 50 | 84  | 24431212 | 1.30E-01 | 1 |
| NKAIN2   | 23367   | 993  | -28 | 553224  | 142044 | 0 | 5  | 0 | 0 | 50 | 97  | 22319420 | 1.30E-01 | 1 |
| NKX2-1   | 58829   | 624  | -18 | 987900  | 310788 | 0 | 3  | 1 | 0 | 40 | 28  | 13382040 | 1.30E-01 | 1 |
| KLHL11   | 1857838 | 191  | 33  | 1774304 | 503740 | 0 | 12 | 2 | 0 | 50 | 87  | 22638752 | 1.30E-01 | 1 |
| YAP1     | 456821  | 327  | -14 | 1289432 | 375580 | 0 | 5  | 1 | 0 | 50 | 52  | 20387052 | 1.30E-01 | 1 |
| CCDC96   | 459652  | 426  | 70  | 1380212 | 403348 | 0 | 7  | 1 | 0 | 14 | 11  | 4743344  | 1.30E-01 | 1 |
| DNAJC3   | 204387  | 552  | 41  | 1340696 | 324316 | 0 | 7  | 1 | 0 | 50 | 60  | 21194816 | 1.30E-01 | 1 |
| CAP2     | 249798  | 454  | -8  | 1249916 | 331792 | 0 | 5  | 1 | 0 | 50 | 46  | 20533368 | 1.31E-01 | 1 |
| DHTKD1   | 341646  | 227  | 25  | 2358856 | 659312 | 0 | 10 | 2 | 0 | 1  | 2   | 1928096  | 1.31E-01 | 1 |
| SULT1B1  | 14468   | 1020 | 1   | 799576  | 181916 | 0 | 6  | 0 | 0 | 50 | 65  | 21034260 | 1.31E-01 | 1 |
| SHC4     | 398758  | 314  | 9   | 1616596 | 452120 | 0 | 5  | 0 | 0 | 42 | 44  | 22308740 | 1.31E-01 | 1 |
| IQCF2    | 849777  | 453  | 39  | 426488  | 114988 | 0 | 2  | 0 | 0 | 50 | 44  | 18199076 | 1.31E-01 | 1 |
| PNPLA3   | 155890  | 393  | 24  | 1217520 | 360984 | 0 | 5  | 0 | 0 | 31 | 22  | 12691400 | 1.31E-01 | 1 |
| CTNNB1   | 305811  | 448  | 8   | 1992176 | 577432 | 0 | 10 | 0 | 0 | 7  | 2   | 2508732  | 1.31E-01 | 1 |
| EIF4A3   | 674340  | 219  | 22  | 1079036 | 288004 | 0 | 7  | 0 | 0 | 36 | 55  | 18118976 | 1.31E-01 | 1 |
| DSC3     | 204823  | 521  | -25 | 2331444 | 641868 | 0 | 10 | 2 | 0 | 17 | 36  | 9788220  | 1.32E-01 | 1 |
| SCAMP3   | 1574928 | 194  | 45  | 887152  | 262016 | 0 | 5  | 1 | 0 | 50 | 57  | 20795740 | 1.32E-01 | 1 |
| NAPEPLD  | 594757  | 579  | 34  | 1023144 | 260592 | 0 | 4  | 1 | 0 | 50 | 70  | 23421240 | 1.32E-01 | 1 |
| IAA1324I | 154470  | 1087 | -7  | 2695632 | 694200 | 0 | 8  | 2 | 0 | 50 | 53  | 21563632 | 1.32E-01 | 1 |
| MLST8    | 2179404 | 224  | 39  | 855112  | 226772 | 0 | 4  | 0 | 0 | 50 | 46  | 19527312 | 1.33E-01 | 1 |
| TSPYL1   | 260958  | 593  | 22  | 1080460 | 322892 | 0 | 6  | 0 | 0 | 30 | 23  | 12449320 | 1.33E-01 | 1 |
| IRAK4    | 132735  | 558  | -16 | 1216096 | 307940 | 0 | 6  | 0 | 0 | 50 | 60  | 24506684 | 1.33E-01 | 1 |
| BRF2     | 660779  | 379  | 37  | 1028484 | 330012 | 0 | 3  | 0 | 0 | 40 | 53  | 23201232 | 1.33E-01 | 1 |
| FAM83D   | 263385  | 581  | 30  | 1509440 | 479176 | 0 | 8  | 0 | 0 | 4  | 2   | 1399080  | 1.33E-01 | 1 |
| RNF25    | 1033606 | 269  | 43  | 1171240 | 347456 | 0 | 4  | 1 | 0 | 50 | 68  | 23381368 | 1.34E-01 | 1 |
| ZIM3     | 311003  | 924  | -64 | 1242440 | 290140 | 0 | 10 | 2 | 0 | 50 | 74  | 18807836 | 1.34E-01 | 1 |
| IL18BP   | 747702  | 311  | 59  | 541120  | 142400 | 0 | 3  | 0 | 0 | 50 | 43  | 16615232 | 1.34E-01 | 1 |
| STK38    | 942238  | 148  | 37  | 1253832 | 294768 | 0 | 6  | 2 | 0 | 50 | 68  | 21788268 | 1.34E-01 | 1 |
| MEGF10   | 245811  | 814  | 6   | 2995028 | 763264 | 0 | 9  | 4 | 0 | 50 | 49  | 19436176 | 1.34E-01 | 1 |
| CDKN2C   | 290894  | 417  | 2   | 422928  | 127092 | 0 | 2  | 0 | 0 | 50 | 60  | 22843808 | 1.34E-01 | 1 |

|          |         |      |     |         |         |   |    |   |   |    |    |          |          |   |
|----------|---------|------|-----|---------|---------|---|----|---|---|----|----|----------|----------|---|
| TMPRSS7  | 265735  | 336  | 21  | 1867220 | 497332  | 0 | 6  | 1 | 0 | 8  | 3  | 3330736  | 1.34E-01 | 1 |
| TGFBR3   | 284037  | 252  | 1   | 2183348 | 610540  | 0 | 10 | 3 | 0 | 50 | 45 | 22245016 | 1.35E-01 | 1 |
| SHISA5   | 1480689 | 223  | 45  | 605912  | 187612  | 0 | 4  | 0 | 0 | 50 | 66 | 22607068 | 1.35E-01 | 1 |
| CMPK1    | 257134  | 210  | 7   | 600216  | 154860  | 0 | 3  | 0 | 0 | 50 | 56 | 21139280 | 1.35E-01 | 1 |
| COX7A2   | 394127  | 423  | -3  | 301532  | 85084   | 0 | 2  | 0 | 0 | 50 | 59 | 20882960 | 1.35E-01 | 1 |
| IL17F    | 313097  | 427  | 23  | 415096  | 121040  | 0 | 2  | 0 | 0 | 50 | 54 | 21973744 | 1.35E-01 | 1 |
| CST7     | 545344  | 676  | -29 | 377004  | 103596  | 0 | 2  | 0 | 0 | 50 | 56 | 19251056 | 1.35E-01 | 1 |
| TRIB3    | 879317  | 185  | 41  | 857604  | 303312  | 0 | 5  | 0 | 0 | 50 | 64 | 20950244 | 1.36E-01 | 1 |
| CXorf36  | 72853   | NaN  | 50  | 1129588 | 336776  | 0 | 4  | 0 | 0 | 7  | 3  | 2790684  | 1.36E-01 | 1 |
| CACNG5   | 284959  | 536  | -39 | 954436  | 284444  | 0 | 6  | 2 | 0 | 50 | 78 | 20115780 | 1.36E-01 | 1 |
| CKMT2    | 182569  | 777  | 30  | 1071204 | 312924  | 0 | 9  | 1 | 0 | 26 | 36 | 11459996 | 1.36E-01 | 1 |
| LIPC     | 441540  | 310  | 27  | 1285516 | 354932  | 0 | 7  | 1 | 0 | 22 | 22 | 7240328  | 1.36E-01 | 1 |
| HIST1H4D | 398813  | 636  | 53  | 249556  | 85796   | 0 | 3  | 1 | 0 | 50 | 45 | 13638004 | 1.36E-01 | 1 |
| HGF      | 57326   | 604  | 17  | 1945184 | 480244  | 0 | 10 | 2 | 0 | 50 | 68 | 23461468 | 1.37E-01 | 1 |
| DACH1    | 30451   | 1135 | -22 | 1774660 | 539696  | 0 | 11 | 1 | 0 | 5  | 9  | 2877548  | 1.37E-01 | 1 |
| TAS2R20  | 365490  | 676  | -2  | 771452  | 221788  | 0 | 5  | 1 | 0 | 50 | 58 | 17850552 | 1.37E-01 | 1 |
| DDR2     | 322980  | 293  | 9   | 2215388 | 595588  | 0 | 9  | 1 | 0 | 50 | 46 | 22589624 | 1.37E-01 | 1 |
| COL28A1  | 220971  | 682  | 6   | 2915640 | 839448  | 0 | 7  | 0 | 0 | 3  | 0  | 1871492  | 1.37E-01 | 1 |
| CCL2     | 26189   | 889  | -12 | 262372  | 68708   | 0 | 1  | 0 | 0 | 50 | 80 | 29689332 | 1.37E-01 | 1 |
| NUP93    | 706254  | 143  | 26  | 2136356 | 580636  | 0 | 8  | 2 | 0 | 49 | 45 | 20778652 | 1.37E-01 | 1 |
| RPS28    | 778783  | 209  | 14  | 184052  | 55180   | 0 | 1  | 0 | 0 | 50 | 66 | 22945268 | 1.37E-01 | 1 |
| SPANXN5  | 476232  | NaN  | 26  | 194732  | 43432   | 0 | 1  | 0 | 0 | 50 | 80 | 25507400 | 1.37E-01 | 1 |
| COQ5     | 1552470 | 216  | 46  | 854400  | 224280  | 0 | 5  | 1 | 0 | 50 | 64 | 22266732 | 1.37E-01 | 1 |
| MGA      | 765304  | 256  | 41  | 7706332 | 2215388 | 0 | 29 | 4 | 0 | 11 | 15 | 7060192  | 1.38E-01 | 1 |
| RPL37    | 212186  | 526  | 19  | 256676  | 72268   | 0 | 1  | 0 | 0 | 50 | 42 | 19365688 | 1.38E-01 | 1 |
| KERA     | 21995   | 523  | -17 | 896408  | 243148  | 0 | 7  | 1 | 0 | 50 | 74 | 21279544 | 1.38E-01 | 1 |
| ARSJ     | 100364  | 497  | 15  | 1501964 | 424708  | 0 | 5  | 0 | 0 | 43 | 40 | 15174144 | 1.38E-01 | 1 |
| ECM2     | 579226  | 474  | 38  | 1809192 | 472056  | 0 | 8  | 1 | 0 | 50 | 68 | 24917864 | 1.38E-01 | 1 |
| ZNF273   | 217076  | 1017 | -15 | 1472060 | 369172  | 0 | 5  | 1 | 0 | 50 | 56 | 19717416 | 1.38E-01 | 1 |
| BRAF     | 305191  | 616  | 25  | 1975088 | 557140  | 0 | 9  | 2 | 0 | 50 | 56 | 23716008 | 1.38E-01 | 1 |
| POLD3    | 540458  | 245  | 36  | 1225352 | 320044  | 0 | 6  | 0 | 0 | 50 | 51 | 22210484 | 1.38E-01 | 1 |
| KATNAL2  | 120136  | 561  | 12  | 1229624 | 326452  | 0 | 7  | 2 | 0 | 34 | 45 | 13609168 | 1.38E-01 | 1 |
| FREM2    | 173964  | 1042 | -10 | 7899996 | 2354940 | 0 | 32 | 8 | 0 | 21 | 26 | 10410152 | 1.38E-01 | 1 |

|          |         |     |     |         |         |   |    |   |   |    |     |          |          |   |
|----------|---------|-----|-----|---------|---------|---|----|---|---|----|-----|----------|----------|---|
| METTL6   | 507426  | 256 | 49  | 744040  | 186188  | 0 | 4  | 0 | 0 | 50 | 44  | 18728804 | 1.39E-01 | 1 |
| IMPG2    | 656520  | 580 | -4  | 3199016 | 857248  | 0 | 14 | 3 | 0 | 17 | 20  | 8089388  | 1.39E-01 | 1 |
| CASP5    | 45234   | 626 | -20 | 1176224 | 299752  | 0 | 7  | 0 | 0 | 27 | 27  | 9984020  | 1.39E-01 | 1 |
| MRPL21   | 594397  | 303 | 45  | 539696  | 156640  | 0 | 2  | 0 | 0 | 50 | 41  | 20150668 | 1.39E-01 | 1 |
| RANBP9   | 277023  | 378 | 29  | 1863660 | 532932  | 0 | 6  | 0 | 0 | 50 | 47  | 23014332 | 1.39E-01 | 1 |
| ATP11B   | 228613  | 559 | 16  | 3092572 | 805628  | 0 | 11 | 1 | 0 | 30 | 31  | 14612732 | 1.39E-01 | 1 |
| APOC2    | 1003719 | 196 | 6   | 265220  | 74404   | 0 | 1  | 0 | 0 | 50 | 42  | 17116124 | 1.39E-01 | 1 |
| HK2      | 707060  | 470 | 21  | 2355296 | 658600  | 0 | 9  | 0 | 0 | 6  | 2   | 2360636  | 1.39E-01 | 1 |
| CCDC81   | 356405  | 283 | 12  | 1724108 | 427912  | 0 | 7  | 1 | 0 | 50 | 47  | 21887236 | 1.39E-01 | 1 |
| HAMP     | 767246  | 472 | 7   | 224280  | 60876   | 0 | 1  | 0 | 0 | 50 | 41  | 16380272 | 1.39E-01 | 1 |
| ASH1L    | 1960625 | 247 | 33  | 7540080 | 2075124 | 0 | 29 | 2 | 0 | 3  | 3   | 2931660  | 1.39E-01 | 1 |
| MCM7     | 1503181 | 254 | 41  | 1829840 | 536848  | 0 | 8  | 2 | 0 | 50 | 81  | 27223676 | 1.39E-01 | 1 |
| DNAJC6   | 269422  | 441 | 0   | 2353872 | 651480  | 0 | 10 | 4 | 0 | 12 | 15  | 6118216  | 1.39E-01 | 1 |
| EDNRB    | 63780   | 954 | 31  | 1231048 | 345320  | 0 | 7  | 2 | 0 | 20 | 13  | 8276288  | 1.40E-01 | 1 |
| DHRX     | NaN     | NaN | NaN | 841584  | 248844  | 0 | 5  | 1 | 0 | 50 | 117 | 39894428 | 1.40E-01 | 1 |
| SNX10    | 918425  | 418 | 29  | 547884  | 124956  | 0 | 3  | 0 | 0 | 50 | 59  | 23097992 | 1.40E-01 | 1 |
| ERCC2    | 1280459 | 215 | 23  | 2012468 | 582772  | 0 | 32 | 4 | 0 | 5  | 13  | 2335360  | 1.40E-01 | 1 |
| C2orf16  | 1192670 | 306 | 41  | 4928464 | 1433612 | 0 | 20 | 0 | 0 | 0  | 0   | 1433612  | 1.40E-01 | 1 |
| HEY2     | 229400  | 351 | -5  | 834820  | 265220  | 0 | 3  | 0 | 0 | 50 | 45  | 22624512 | 1.40E-01 | 1 |
| CORIN    | 113961  | 622 | 44  | 2758288 | 675332  | 0 | 8  | 0 | 0 | 7  | 1   | 2568896  | 1.40E-01 | 1 |
| PRAMEF12 | 141239  | 571 | 18  | 1196160 | 365256  | 0 | 6  | 2 | 0 | 50 | 46  | 17600996 | 1.40E-01 | 1 |
| ZCWPW2   | 67695   | 922 | -13 | 962624  | 215380  | 0 | 7  | 0 | 0 | 50 | 70  | 24680412 | 1.40E-01 | 1 |
| SESTD1   | 66477   | 684 | 11  | 1843724 | 462088  | 0 | 5  | 1 | 0 | 50 | 70  | 24885824 | 1.41E-01 | 1 |
| RAD17    | 467846  | 314 | 46  | 1801716 | 463512  | 0 | 6  | 0 | 0 | 37 | 31  | 16097252 | 1.41E-01 | 1 |
| UROS     | 211688  | 280 | -5  | 702388  | 188324  | 0 | 3  | 1 | 0 | 50 | 53  | 21904324 | 1.41E-01 | 1 |
| YAF2     | 173442  | 585 | 2   | 472412  | 122464  | 0 | 2  | 0 | 0 | 50 | 47  | 20054904 | 1.41E-01 | 1 |
| PTTG1IP  | 690574  | 213 | 62  | 475260  | 126024  | 0 | 3  | 0 | 0 | 50 | 59  | 16183404 | 1.41E-01 | 1 |
| WNT7A    | 422569  | 498 | 34  | 886796  | 247420  | 0 | 4  | 1 | 0 | 50 | 39  | 18377432 | 1.42E-01 | 1 |
| ACTA2    | 181406  | 267 | 30  | 978644  | 266644  | 0 | 7  | 0 | 0 | 50 | 47  | 17394872 | 1.42E-01 | 1 |
| GSDMC    | 258154  | 428 | 13  | 1342120 | 344252  | 0 | 4  | 1 | 0 | 50 | 50  | 21604572 | 1.42E-01 | 1 |
| WASF2    | 795528  | 156 | 26  | 1250984 | 381988  | 0 | 6  | 0 | 0 | 34 | 36  | 15755136 | 1.42E-01 | 1 |
| TRIO     | 518529  | 557 | 29  | 7991132 | 2176228 | 0 | 29 | 3 | 0 | 9  | 5   | 3907456  | 1.42E-01 | 1 |
| CCDC28B  | 1460758 | 218 | 29  | 516912  | 148452  | 0 | 3  | 0 | 0 | 50 | 52  | 21684672 | 1.42E-01 | 1 |

|         |         |      |     |         |         |   |    |   |   |    |    |          |          |   |
|---------|---------|------|-----|---------|---------|---|----|---|---|----|----|----------|----------|---|
| EEF1E1  | 566741  | 368  | 9   | 483448  | 132788  | 0 | 3  | 0 | 0 | 50 | 69 | 24927832 | 1.43E-01 | 1 |
| INSL4   | 372067  | 616  | 20  | 347812  | 107156  | 0 | 3  | 0 | 0 | 50 | 47 | 18943828 | 1.43E-01 | 1 |
| UQCRHL  | 821457  | 174  | 37  | 238520  | 58384   | 0 | 1  | 0 | 0 | 50 | 43 | 16225768 | 1.43E-01 | 1 |
| TKTL1   | 2436137 | NaN  | 14  | 1531512 | 432540  | 0 | 6  | 2 | 0 | 41 | 58 | 22788984 | 1.43E-01 | 1 |
| TGFBR2  | 80018   | 417  | -9  | 1523680 | 406196  | 0 | 5  | 1 | 0 | 50 | 58 | 21712440 | 1.43E-01 | 1 |
| TMEM159 | 338008  | 549  | 39  | 410112  | 121752  | 0 | 2  | 0 | 0 | 50 | 53 | 20769752 | 1.43E-01 | 1 |
| SYT15   | 165245  | 269  | 20  | 1111788 | 330012  | 0 | 3  | 0 | 0 | 50 | 43 | 19432616 | 1.43E-01 | 1 |
| S100A2  | 1454773 | 186  | 26  | 258812  | 63724   | 0 | 1  | 0 | 0 | 50 | 56 | 19376724 | 1.44E-01 | 1 |
| NUP133  | 249616  | 277  | 25  | 3000724 | 815240  | 0 | 9  | 2 | 0 | 34 | 29 | 14543312 | 1.44E-01 | 1 |
| PTH1R   | 442069  | 376  | 41  | 1516916 | 446068  | 0 | 6  | 1 | 0 | 50 | 51 | 20073772 | 1.44E-01 | 1 |
| BMP5    | 68578   | 483  | -9  | 1173376 | 312212  | 0 | 5  | 2 | 0 | 50 | 68 | 24549404 | 1.44E-01 | 1 |
| DRAM2   | 376648  | 708  | 13  | 694912  | 190460  | 0 | 4  | 0 | 0 | 50 | 69 | 22199092 | 1.44E-01 | 1 |
| ANO10   | 106227  | 518  | 29  | 1723752 | 445356  | 0 | 6  | 0 | 0 | 50 | 53 | 23984076 | 1.44E-01 | 1 |
| BTN1A1  | 426020  | 498  | 34  | 1324320 | 391956  | 0 | 7  | 2 | 0 | 25 | 17 | 8419756  | 1.44E-01 | 1 |
| MUSK    | 254657  | 422  | 9   | 2252768 | 630832  | 0 | 7  | 3 | 0 | 50 | 44 | 23370332 | 1.44E-01 | 1 |
| PRDM4   | 119393  | 805  | 22  | 2050204 | 562124  | 0 | 9  | 1 | 0 | 50 | 44 | 21404144 | 1.45E-01 | 1 |
| CRTP5-1 | 586193  | 626  | 50  | 399788  | 105376  | 0 | 2  | 0 | 0 | 41 | 39 | 13806036 | 1.45E-01 | 1 |
| BFAR    | 519767  | 367  | 45  | 1166968 | 307940  | 0 | 6  | 1 | 0 | 50 | 58 | 18288076 | 1.45E-01 | 1 |
| NAT8    | 876583  | 590  | 16  | 560344  | 174440  | 0 | 4  | 0 | 0 | 50 | 92 | 26607084 | 1.45E-01 | 1 |
| DNM1L   | 307288  | 308  | -5  | 1908160 | 534356  | 0 | 5  | 0 | 0 | 9  | 12 | 5362784  | 1.45E-01 | 1 |
| KLHDC7A | 276385  | 648  | 15  | 1870068 | 624780  | 0 | 7  | 3 | 0 | 40 | 54 | 22712800 | 1.45E-01 | 1 |
| TGM5    | 825765  | 415  | 44  | 1863304 | 500180  | 0 | 7  | 3 | 0 | 50 | 75 | 24827084 | 1.45E-01 | 1 |
| WWC1    | 413858  | 343  | 23  | 2868648 | 815952  | 0 | 10 | 2 | 0 | 50 | 38 | 18760844 | 1.45E-01 | 1 |
| UTP3    | 262444  | 609  | 19  | 1202568 | 335352  | 0 | 5  | 0 | 0 | 18 | 11 | 7832356  | 1.45E-01 | 1 |
| HCN1    | 80822   | 1235 | -24 | 2233188 | 653616  | 0 | 19 | 7 | 0 | 18 | 33 | 6364568  | 1.45E-01 | 1 |
| MYO1F   | 674374  | 214  | -7  | 2854052 | 782488  | 0 | 19 | 2 | 0 | 50 | 74 | 21331164 | 1.45E-01 | 1 |
| ZFYVE16 | 318922  | 590  | 33  | 3966552 | 1040232 | 0 | 11 | 0 | 0 | 4  | 0  | 1913144  | 1.45E-01 | 1 |
| BOLL    | 639001  | 684  | 22  | 780352  | 210752  | 0 | 3  | 0 | 0 | 50 | 46 | 20752664 | 1.46E-01 | 1 |
| SYK     | 126037  | 542  | 32  | 1656112 | 437168  | 0 | 7  | 3 | 0 | 16 | 20 | 8519436  | 1.46E-01 | 1 |
| COX5A   | 792240  | 199  | 45  | 385548  | 115344  | 0 | 4  | 0 | 0 | 50 | 67 | 21522692 | 1.46E-01 | 1 |
| TSSK3   | 1529661 | 216  | 41  | 677112  | 191172  | 0 | 4  | 0 | 0 | 50 | 65 | 23479268 | 1.46E-01 | 1 |
| FABP9   | 191177  | 595  | 1   | 356000  | 81880   | 0 | 3  | 0 | 0 | 50 | 53 | 20427636 | 1.46E-01 | 1 |
| LPPR5   | 37516   | 947  | -17 | 816664  | 236384  | 0 | 6  | 1 | 0 | 50 | 72 | 19946680 | 1.46E-01 | 1 |



|          |         |     |     |         |        |   |    |   |   |    |     |          |          |   |
|----------|---------|-----|-----|---------|--------|---|----|---|---|----|-----|----------|----------|---|
| ADHFE1   | 259302  | 268 | 12  | 1200432 | 356712 | 0 | 4  | 1 | 0 | 50 | 51  | 20442588 | 1.47E-01 | 1 |
| GUCY1A2  | 63799   | 885 | -21 | 1850488 | 527948 | 0 | 10 | 1 | 0 | 19 | 16  | 6332884  | 1.47E-01 | 1 |
| RPS12    | 131337  | 443 | 18  | 359916  | 89712  | 0 | 3  | 0 | 0 | 50 | 58  | 20879756 | 1.47E-01 | 1 |
| EMILIN2  | 564910  | 468 | 37  | 2634400 | 772520 | 0 | 14 | 4 | 0 | 50 | 60  | 24026796 | 1.47E-01 | 1 |
| HRASLS   | 141065  | 851 | -4  | 433608  | 118548 | 0 | 3  | 0 | 0 | 50 | 64  | 18979784 | 1.47E-01 | 1 |
| CORO6    | 719319  | 383 | 30  | 1211468 | 344608 | 0 | 8  | 2 | 0 | 50 | 60  | 20013252 | 1.47E-01 | 1 |
| ANXA9    | 1621279 | 172 | 30  | 901748  | 258100 | 0 | 7  | 0 | 0 | 33 | 60  | 14315472 | 1.48E-01 | 1 |
| GABRG1   | 36353   | 926 | -2  | 1212536 | 314704 | 0 | 9  | 0 | 0 | 12 | 24  | 5916364  | 1.48E-01 | 1 |
| IL21     | 126588  | 388 | 2   | 435032  | 108580 | 0 | 3  | 0 | 0 | 50 | 42  | 21396312 | 1.48E-01 | 1 |
| C9orf43  | 390186  | 297 | 36  | 1229624 | 306160 | 0 | 4  | 1 | 0 | 50 | 42  | 19391676 | 1.48E-01 | 1 |
| SLC5A9   | 27457   | 480 | -10 | 1783204 | 543968 | 0 | 8  | 2 | 0 | 50 | 67  | 23994044 | 1.48E-01 | 1 |
| FAM189A2 | 216587  | 539 | 0   | 1139912 | 347812 | 0 | 4  | 0 | 0 | 18 | 20  | 8594196  | 1.48E-01 | 1 |
| B3GNT4   | 808864  | 187 | 12  | 923108  | 299752 | 0 | 5  | 0 | 0 | 50 | 65  | 20660104 | 1.48E-01 | 1 |
| RPGRIP1L | 248316  | 406 | -15 | 3471712 | 855824 | 0 | 13 | 1 | 0 | 47 | 27  | 17714560 | 1.48E-01 | 1 |
| BLVRA    | 690958  | 250 | 45  | 775368  | 208260 | 0 | 4  | 0 | 0 | 24 | 30  | 12240348 | 1.48E-01 | 1 |
| CRLF2    | NaN     | NaN | NaN | 673196  | 176932 | 0 | 2  | 0 | 0 | 50 | 116 | 39822516 | 1.49E-01 | 1 |
| PREPL    | 433205  | 522 | 29  | 1917772 | 475616 | 0 | 6  | 0 | 0 | 19 | 7   | 6167344  | 1.49E-01 | 1 |
| PNPLA5   | 157623  | 473 | 13  | 1088648 | 323248 | 0 | 3  | 0 | 0 | 45 | 47  | 20216172 | 1.49E-01 | 1 |
| CRTAM    | 651341  | 416 | 7   | 1033824 | 267000 | 0 | 4  | 0 | 0 | 35 | 39  | 14183752 | 1.49E-01 | 1 |
| DDI1     | NaN     | NaN | NaN | 977220  | 294768 | 0 | 7  | 1 | 0 | 50 | 117 | 39940352 | 1.49E-01 | 1 |
| KCND2    | 49438   | 962 | 7   | 1579928 | 463156 | 0 | 8  | 2 | 0 | 14 | 17  | 8073368  | 1.49E-01 | 1 |
| UGP2     | 312741  | 380 | 10  | 1311148 | 358136 | 0 | 6  | 0 | 0 | 50 | 55  | 23432276 | 1.49E-01 | 1 |
| H3F3A    | 866965  | 237 | 23  | 343184  | 108580 | 0 | 3  | 0 | 0 | 50 | 51  | 16052396 | 1.49E-01 | 1 |
| SPATS1   | 993997  | 443 | 40  | 796728  | 200784 | 0 | 5  | 1 | 0 | 50 | 77  | 24910032 | 1.49E-01 | 1 |
| ATP5F1   | 397613  | 348 | 23  | 663940  | 185120 | 0 | 4  | 1 | 0 | 36 | 30  | 14351072 | 1.49E-01 | 1 |
| OR56B4   | 465433  | 806 | -1  | 780708  | 242436 | 0 | 4  | 1 | 0 | 8  | 7   | 2668576  | 1.50E-01 | 1 |
| GNB1     | 1492510 | 229 | 26  | 890000  | 245284 | 0 | 3  | 0 | 0 | 50 | 48  | 18853404 | 1.51E-01 | 1 |
| GDPD4    | 448138  | 469 | 44  | 1380924 | 352440 | 0 | 7  | 1 | 0 | 50 | 69  | 22328320 | 1.51E-01 | 1 |
| C9orf40  | 95383   | 649 | -18 | 475972  | 153080 | 0 | 2  | 0 | 0 | 50 | 62  | 27519512 | 1.51E-01 | 1 |
| DYNLT1   | 623771  | 306 | 49  | 313636  | 70844  | 0 | 1  | 0 | 0 | 50 | 43  | 18139624 | 1.51E-01 | 1 |
| INSIG2   | 190880  | 537 | 8   | 576008  | 165184 | 0 | 3  | 0 | 0 | 50 | 67  | 25875860 | 1.51E-01 | 1 |
| PDGFRA   | 51422   | 518 | 27  | 2835540 | 750804 | 0 | 16 | 5 | 0 | 17 | 21  | 7212204  | 1.51E-01 | 1 |
| C6orf226 | 1086050 | 203 | 41  | 238876  | 90068  | 0 | 1  | 0 | 0 | 50 | 45  | 16793588 | 1.52E-01 | 1 |

|         |         |      |     |         |         |   |    |   |   |    |     |          |          |   |
|---------|---------|------|-----|---------|---------|---|----|---|---|----|-----|----------|----------|---|
| OR7C1   | 963401  | 546  | 14  | 780352  | 245996  | 0 | 4  | 1 | 0 | 47 | 68  | 17530508 | 1.52E-01 | 1 |
| DEPDC1  | 196163  | 601  | -18 | 2113216 | 535424  | 0 | 8  | 0 | 0 | 4  | 2   | 2216812  | 1.52E-01 | 1 |
| OR1S2   | 637499  | 828  | -25 | 804916  | 238520  | 0 | 6  | 0 | 0 | 50 | 51  | 16635524 | 1.52E-01 | 1 |
| TXNDC12 | 665927  | 315  | 21  | 466004  | 113920  | 0 | 2  | 0 | 0 | 50 | 59  | 26353256 | 1.52E-01 | 1 |
| STATH   | 9753    | 991  | -4  | 182272  | 40940   | 0 | 1  | 0 | 0 | 50 | 76  | 18672912 | 1.52E-01 | 1 |
| ALDOA   | NaN     | NaN  | NaN | 927380  | 276256  | 0 | 5  | 2 | 0 | 50 | 118 | 39921840 | 1.52E-01 | 1 |
| TRIM15  | 1932849 | 486  | 48  | 1178360 | 340336  | 0 | 5  | 0 | 0 | 50 | 60  | 20279184 | 1.52E-01 | 1 |
| MPRSS11 | 211571  | 812  | -6  | 1145964 | 301176  | 0 | 6  | 2 | 0 | 50 | 49  | 21367832 | 1.52E-01 | 1 |
| PTGER4  | 210761  | 496  | -8  | 1185836 | 389464  | 0 | 6  | 1 | 0 | 50 | 58  | 23764068 | 1.52E-01 | 1 |
| GATC    | 1563159 | 216  | 45  | 349592  | 106444  | 0 | 2  | 1 | 0 | 23 | 20  | 7249584  | 1.52E-01 | 1 |
| CDH16   | 942986  | 142  | 34  | 2093280 | 638664  | 0 | 12 | 4 | 0 | 50 | 65  | 21541916 | 1.52E-01 | 1 |
| SCEL    | 193860  | 752  | 51  | 1908872 | 435388  | 0 | 7  | 0 | 0 | 6  | 2   | 2382708  | 1.52E-01 | 1 |
| VPS28   | 2043455 | 200  | 36  | 693844  | 177644  | 0 | 5  | 0 | 0 | 50 | 64  | 16927800 | 1.53E-01 | 1 |
| UBQLN2  | 126215  | NaN  | 7   | 1530444 | 472056  | 0 | 9  | 0 | 0 | 11 | 9   | 5062320  | 1.53E-01 | 1 |
| BMF     | 884609  | 226  | 39  | 492348  | 113208  | 0 | 3  | 0 | 0 | 50 | 64  | 21160640 | 1.54E-01 | 1 |
| STOM    | 580458  | 388  | 39  | 738344  | 215380  | 0 | 4  | 1 | 0 | 50 | 65  | 22559008 | 1.54E-01 | 1 |
| STK3    | 332778  | 550  | 25  | 1312928 | 306160  | 0 | 6  | 1 | 0 | 11 | 10  | 5637616  | 1.54E-01 | 1 |
| CRTP19L | 14979   | 1035 | -68 | 134568  | 33108   | 0 | 1  | 0 | 0 | 50 | 77  | 14168444 | 1.54E-01 | 1 |
| GSTM3   | 927739  | 201  | 22  | 611252  | 142756  | 0 | 3  | 1 | 0 | 50 | 50  | 14380264 | 1.54E-01 | 1 |
| PRRX1   | 61224   | 921  | -7  | 672484  | 195800  | 0 | 4  | 0 | 0 | 50 | 65  | 23701768 | 1.54E-01 | 1 |
| NRP1    | 360090  | 488  | -9  | 2410120 | 630476  | 0 | 9  | 1 | 0 | 50 | 62  | 25866248 | 1.54E-01 | 1 |
| USP33   | 432858  | 192  | 2   | 2515852 | 616592  | 0 | 10 | 1 | 0 | 50 | 51  | 18491352 | 1.55E-01 | 1 |
| IL7R    | 139461  | 511  | 5   | 1193312 | 312568  | 0 | 7  | 1 | 0 | 8  | 7   | 2180500  | 1.55E-01 | 1 |
| PAIP1   | 482851  | 434  | 19  | 1238524 | 342116  | 0 | 8  | 0 | 0 | 27 | 30  | 9310824  | 1.55E-01 | 1 |
| MX1     | 253874  | 454  | 53  | 1724108 | 455680  | 0 | 9  | 0 | 0 | 25 | 43  | 14717396 | 1.55E-01 | 1 |
| ATP6V1H | 263637  | 437  | 9   | 1293704 | 312568  | 0 | 6  | 0 | 0 | 37 | 35  | 16767244 | 1.55E-01 | 1 |
| SLC17A2 | 392745  | 685  | 34  | 1114636 | 328232  | 0 | 6  | 3 | 0 | 16 | 14  | 5856200  | 1.56E-01 | 1 |
| DMXL1   | 305800  | 381  | 28  | 7786788 | 2094348 | 0 | 22 | 3 | 0 | 30 | 19  | 12425112 | 1.56E-01 | 1 |
| OR4F6   | 215780  | 643  | -16 | 771808  | 228908  | 0 | 5  | 1 | 0 | 42 | 59  | 17722748 | 1.56E-01 | 1 |
| GNG12   | 476287  | 228  | -7  | 192952  | 49484   | 0 | 2  | 0 | 0 | 50 | 64  | 22043876 | 1.56E-01 | 1 |
| PSEN1   | 474907  | 269  | 39  | 1211824 | 330368  | 0 | 5  | 0 | 0 | 50 | 47  | 17333640 | 1.56E-01 | 1 |
| MRPS22  | 261288  | 671  | 9   | 937704  | 253116  | 0 | 7  | 0 | 0 | 50 | 56  | 21099764 | 1.56E-01 | 1 |
| CD96    | 186134  | 406  | -16 | 1540056 | 397296  | 0 | 8  | 1 | 0 | 50 | 40  | 20447216 | 1.56E-01 | 1 |

|          |         |     |     |         |         |   |    |   |   |    |    |          |          |   |
|----------|---------|-----|-----|---------|---------|---|----|---|---|----|----|----------|----------|---|
| CATSPER1 | 3854361 | 208 | 57  | 2006772 | 542544  | 0 | 8  | 0 | 0 | 6  | 2  | 2582780  | 1.56E-01 | 1 |
| GTF2E2   | 489611  | 228 | 38  | 767892  | 197580  | 0 | 3  | 0 | 0 | 50 | 30 | 17008968 | 1.56E-01 | 1 |
| RAB25    | 2005405 | 213 | 39  | 541120  | 161624  | 0 | 4  | 1 | 0 | 30 | 49 | 13721664 | 1.57E-01 | 1 |
| OR2J3    | 155147  | 738 | 1   | 760060  | 238520  | 0 | 5  | 1 | 0 | 37 | 37 | 16234668 | 1.57E-01 | 1 |
| HTR1F    | 123008  | 898 | -19 | 915632  | 264508  | 0 | 6  | 1 | 0 | 50 | 72 | 22331168 | 1.57E-01 | 1 |
| SLC14A1  | 381180  | 401 | 25  | 1138132 | 329300  | 0 | 4  | 0 | 0 | 50 | 32 | 19872276 | 1.57E-01 | 1 |
| CHL1     | 25264   | 796 | 9   | 3208984 | 826988  | 0 | 14 | 2 | 0 | 43 | 44 | 20773312 | 1.57E-01 | 1 |
| ZMYND8   | 303060  | 186 | 44  | 3103252 | 802424  | 0 | 15 | 4 | 0 | 50 | 46 | 16443640 | 1.57E-01 | 1 |
| PSPH     | 749444  | 642 | 7   | 582772  | 162692  | 0 | 5  | 0 | 0 | 50 | 72 | 22576096 | 1.57E-01 | 1 |
| FMN2     | 55160   | 851 | -26 | 4205784 | 1387332 | 0 | 24 | 5 | 0 | 38 | 74 | 17333996 | 1.57E-01 | 1 |
| USP12    | 283040  | 221 | 52  | 984340  | 238520  | 0 | 3  | 0 | 0 | 50 | 50 | 20403428 | 1.57E-01 | 1 |
| TRIM10   | 1932849 | 486 | 48  | 1294060 | 369884  | 0 | 6  | 1 | 0 | 50 | 60 | 20279184 | 1.58E-01 | 1 |
| BMPR1A   | 379827  | 195 | 26  | 1388756 | 361696  | 0 | 3  | 0 | 0 | 22 | 15 | 11290540 | 1.58E-01 | 1 |
| ZNF292   | 222401  | 547 | 19  | 6914944 | 1844792 | 0 | 22 | 2 | 0 | 5  | 3  | 3164128  | 1.58E-01 | 1 |
| OR52K1   | 190769  | 879 | -1  | 769316  | 244216  | 0 | 4  | 0 | 0 | 50 | 51 | 19817096 | 1.58E-01 | 1 |
| OPA1     | 148817  | 456 | 12  | 2721264 | 662160  | 0 | 11 | 1 | 0 | 50 | 63 | 22583928 | 1.58E-01 | 1 |
| OR10V1   | 431271  | 409 | 27  | 759348  | 233892  | 0 | 4  | 0 | 0 | 31 | 35 | 13655092 | 1.58E-01 | 1 |
| FAM20B   | 352872  | 244 | 1   | 1042012 | 297260  | 0 | 3  | 0 | 0 | 50 | 55 | 25243960 | 1.58E-01 | 1 |
| KLRG1    | 301954  | 416 | 11  | 499824  | 128160  | 0 | 2  | 0 | 0 | 50 | 55 | 24142140 | 1.58E-01 | 1 |
| DFFA     | 829921  | 392 | 32  | 860452  | 250268  | 0 | 6  | 1 | 0 | 50 | 57 | 23206928 | 1.58E-01 | 1 |
| MRPL50   | 112947  | 898 | -22 | 402636  | 113208  | 0 | 3  | 0 | 0 | 50 | 80 | 21577872 | 1.58E-01 | 1 |
| MTF2     | 611888  | 391 | 16  | 1568536 | 394448  | 0 | 5  | 1 | 0 | 33 | 28 | 13505928 | 1.58E-01 | 1 |
| ERG      | 162262  | 418 | 4   | 1286940 | 337488  | 0 | 5  | 1 | 0 | 50 | 33 | 17654040 | 1.59E-01 | 1 |
| NPM3     | 817474  | 335 | 37  | 466716  | 131364  | 0 | 4  | 0 | 0 | 50 | 56 | 20205136 | 1.59E-01 | 1 |
| ST20     | 228288  | 702 | 18  | 207192  | 59808   | 0 | 2  | 0 | 0 | 50 | 55 | 18606340 | 1.59E-01 | 1 |
| FAM160A2 | 466636  | 728 | 4   | 2391252 | 813816  | 0 | 11 | 2 | 0 | 44 | 49 | 19814604 | 1.59E-01 | 1 |
| GC       | 17296   | 933 | -6  | 1242796 | 330368  | 0 | 6  | 0 | 0 | 6  | 4  | 2399084  | 1.59E-01 | 1 |
| THG1L    | 243382  | 987 | 31  | 783200  | 196156  | 0 | 4  | 0 | 0 | 50 | 48 | 18799648 | 1.59E-01 | 1 |
| AFF2     | 97330   | NaN | -13 | 3406208 | 941620  | 0 | 13 | 5 | 0 | 19 | 17 | 7347840  | 1.59E-01 | 1 |
| TAF3     | 189040  | 596 | -1  | 2349244 | 655040  | 0 | 9  | 1 | 0 | 47 | 39 | 18690000 | 1.59E-01 | 1 |
| CPE      | 171042  | 494 | -9  | 1230336 | 332148  | 0 | 6  | 0 | 0 | 27 | 36 | 14329356 | 1.59E-01 | 1 |
| OR5K1    | 416592  | 885 | -4  | 772164  | 220008  | 0 | 3  | 2 | 0 | 50 | 71 | 20173096 | 1.60E-01 | 1 |
| GPR108   | 736129  | 272 | 27  | 1419016 | 398720  | 0 | 5  | 1 | 0 | 50 | 67 | 24524840 | 1.60E-01 | 1 |

|          |         |      |     |         |         |   |    |   |   |    |    |          |          |   |
|----------|---------|------|-----|---------|---------|---|----|---|---|----|----|----------|----------|---|
| C10orf67 | 77657   | 278  | -3  | 491636  | 123532  | 0 | 2  | 0 | 0 | 50 | 48 | 21196952 | 1.60E-01 | 1 |
| CRTC3    | 1079582 | 204  | 41  | 1566400 | 479888  | 0 | 9  | 1 | 0 | 50 | 48 | 18000072 | 1.60E-01 | 1 |
| DCAF4L1  | 272281  | 261  | 25  | 974728  | 299396  | 0 | 3  | 0 | 0 | 50 | 58 | 22426220 | 1.60E-01 | 1 |
| UBE2I    | 1150864 | 215  | 36  | 427912  | 107156  | 0 | 2  | 0 | 0 | 50 | 52 | 19119336 | 1.60E-01 | 1 |
| TUBB6    | 492344  | 214  | 26  | 1130300 | 316840  | 0 | 7  | 2 | 0 | 37 | 65 | 15004332 | 1.60E-01 | 1 |
| FGF16    | 547612  | NaN  | -7  | 293700  | 83304   | 0 | 2  | 0 | 0 | 50 | 67 | 19959496 | 1.60E-01 | 1 |
| HTRA3    | 170889  | 242  | 52  | 1131724 | 357068  | 0 | 6  | 1 | 0 | 50 | 45 | 17282732 | 1.60E-01 | 1 |
| TMEM213  | 352046  | 385  | 7   | 281240  | 79744   | 0 | 1  | 0 | 0 | 50 | 46 | 18605984 | 1.61E-01 | 1 |
| NDUFA5   | 88676   | 779  | -25 | 314348  | 77608   | 0 | 2  | 0 | 0 | 50 | 81 | 21308024 | 1.61E-01 | 1 |
| RTP1     | 425258  | 445  | 28  | 666788  | 185476  | 0 | 4  | 1 | 0 | 16 | 13 | 7467100  | 1.61E-01 | 1 |
| GYS2     | 510830  | 830  | -17 | 1834824 | 484872  | 0 | 10 | 2 | 0 | 50 | 53 | 15575000 | 1.61E-01 | 1 |
| PRDM2    | 68342   | 892  | 25  | 4400872 | 1213604 | 0 | 15 | 2 | 0 | 50 | 51 | 22361072 | 1.61E-01 | 1 |
| CREB5    | 58752   | 518  | 26  | 1367752 | 360272  | 0 | 7  | 3 | 0 | 13 | 17 | 5782152  | 1.61E-01 | 1 |
| NCOA1    | 343965  | 403  | 33  | 3720200 | 1035604 | 0 | 14 | 2 | 0 | 50 | 48 | 20224716 | 1.61E-01 | 1 |
| TRMT112  | 1613996 | 257  | 65  | 323960  | 94696   | 0 | 3  | 0 | 0 | 19 | 29 | 6446448  | 1.61E-01 | 1 |
| NR2C2AP  | 940952  | 232  | 17  | 367392  | 100392  | 0 | 2  | 0 | 0 | 50 | 65 | 20645152 | 1.61E-01 | 1 |
| GSK3B    | 467052  | 421  | 19  | 1112500 | 325028  | 0 | 4  | 1 | 0 | 50 | 45 | 16033884 | 1.61E-01 | 1 |
| HSBP1    | 298486  | 673  | -13 | 214668  | 46992   | 0 | 2  | 0 | 0 | 50 | 57 | 20502752 | 1.62E-01 | 1 |
| MMP27    | 530224  | 567  | -10 | 1347104 | 342472  | 0 | 4  | 1 | 0 | 50 | 50 | 17183764 | 1.62E-01 | 1 |
| CYB5D1   | 2148615 | 337  | 24  | 580992  | 165540  | 0 | 3  | 1 | 0 | 32 | 35 | 14422984 | 1.62E-01 | 1 |
| CXCR4    | 431866  | 406  | 42  | 902104  | 262016  | 0 | 4  | 0 | 0 | 50 | 50 | 20390256 | 1.62E-01 | 1 |
| TMSB4Y   | 0       | 0    | 0   | 121752  | 26700   | 0 | 1  | 0 | 0 | 5  | 1  | 910292   | 1.62E-01 | 1 |
| IL31RA   | 319744  | 438  | 44  | 1994668 | 520472  | 0 | 7  | 1 | 0 | 50 | 67 | 24088028 | 1.62E-01 | 1 |
| RSRC1    | 196207  | 1080 | -3  | 879676  | 232112  | 0 | 4  | 0 | 0 | 50 | 36 | 16677532 | 1.62E-01 | 1 |
| PRSS42   | 413835  | 495  | 38  | 741192  | 216804  | 0 | 3  | 0 | 0 | 50 | 53 | 17553292 | 1.63E-01 | 1 |
| PPFIA3   | 2011861 | 267  | 47  | 3038460 | 918480  | 0 | 14 | 4 | 0 | 50 | 71 | 20637320 | 1.63E-01 | 1 |
| CFL2     | 573593  | 145  | 24  | 443932  | 109292  | 0 | 4  | 0 | 0 | 50 | 48 | 18848064 | 1.63E-01 | 1 |
| TECRL    | 2644    | 1049 | -22 | 971524  | 241724  | 0 | 9  | 3 | 0 | 5  | 11 | 2044864  | 1.63E-01 | 1 |
| CAMTA2   | 1416161 | 231  | 30  | 3164128 | 955148  | 0 | 15 | 1 | 0 | 33 | 38 | 12888980 | 1.63E-01 | 1 |
| UTP20    | 261840  | 760  | -5  | 7282336 | 1904600 | 0 | 20 | 0 | 0 | 0  | 0  | 1904600  | 1.63E-01 | 1 |
| RPL7L1   | 1086050 | 203  | 41  | 639376  | 175508  | 0 | 3  | 0 | 0 | 50 | 45 | 16793588 | 1.63E-01 | 1 |
| FAM188A  | 70308   | 903  | -2  | 1188328 | 300464  | 0 | 6  | 0 | 0 | 50 | 52 | 20210832 | 1.63E-01 | 1 |
| BCLAF1   | 286851  | 153  | 21  | 2366332 | 631544  | 0 | 7  | 1 | 0 | 50 | 51 | 25828512 | 1.64E-01 | 1 |

|           |         |     |     |         |         |   |    |   |   |    |    |          |          |   |
|-----------|---------|-----|-----|---------|---------|---|----|---|---|----|----|----------|----------|---|
| OSR1      | 63105   | 842 | -9  | 658956  | 205056  | 0 | 5  | 0 | 0 | 50 | 87 | 28890824 | 1.64E-01 | 1 |
| CLK2      | 1574928 | 194 | 45  | 1304384 | 343540  | 0 | 9  | 1 | 0 | 50 | 57 | 20795740 | 1.64E-01 | 1 |
| NAPA      | 794875  | 276 | 44  | 799576  | 191528  | 0 | 4  | 0 | 0 | 43 | 60 | 18144964 | 1.64E-01 | 1 |
| USE1      | 865138  | 212 | 38  | 673552  | 193664  | 0 | 3  | 0 | 0 | 50 | 59 | 18864796 | 1.64E-01 | 1 |
| SLC30A9   | 270740  | 261 | 28  | 1494132 | 401568  | 0 | 5  | 0 | 0 | 9  | 8  | 3733728  | 1.64E-01 | 1 |
| OVCH1     | 100195  | 539 | -5  | 2973312 | 780708  | 0 | 10 | 4 | 0 | 50 | 62 | 21611692 | 1.64E-01 | 1 |
| OR10Z1    | 179404  | 940 | 1   | 762552  | 242436  | 0 | 7  | 2 | 0 | 6  | 15 | 3888232  | 1.64E-01 | 1 |
| MTM1      | 287123  | NaN | 16  | 1588828 | 406196  | 0 | 6  | 1 | 0 | 28 | 22 | 10031724 | 1.64E-01 | 1 |
| CALR3     | 808967  | 218 | 35  | 1032044 | 239944  | 0 | 3  | 2 | 0 | 50 | 44 | 17139620 | 1.64E-01 | 1 |
| NRNPA2E   | 915230  | 445 | 43  | 945180  | 236028  | 0 | 9  | 2 | 0 | 15 | 16 | 4912444  | 1.64E-01 | 1 |
| COPS4     | 556523  | 169 | 47  | 1071916 | 270560  | 0 | 5  | 1 | 0 | 50 | 53 | 17290208 | 1.64E-01 | 1 |
| FOS       | 855880  | 154 | 51  | 936992  | 296548  | 0 | 4  | 1 | 0 | 50 | 77 | 21924260 | 1.64E-01 | 1 |
| TNF       | 2517285 | 220 | 35  | 581348  | 181204  | 0 | 3  | 1 | 0 | 15 | 15 | 4137432  | 1.64E-01 | 1 |
| OGDH      | 1420793 | 179 | 56  | 2783920 | 773588  | 0 | 16 | 5 | 0 | 29 | 26 | 10196908 | 1.65E-01 | 1 |
| NMD3      | 242883  | 581 | -16 | 1355648 | 323248  | 0 | 7  | 0 | 0 | 38 | 35 | 14140676 | 1.65E-01 | 1 |
| HIST1H2AI | 228884  | 634 | 40  | 313280  | 110716  | 0 | 3  | 1 | 0 | 23 | 29 | 6014264  | 1.65E-01 | 1 |
| SLC6A7    | 1002307 | 228 | 49  | 1615528 | 480956  | 0 | 6  | 2 | 0 | 50 | 53 | 19888652 | 1.65E-01 | 1 |
| RPL36A    | 374364  | NaN | 37  | 294056  | 70132   | 0 | 1  | 0 | 0 | 50 | 61 | 21564700 | 1.65E-01 | 1 |
| FAM181A   | 242993  | 645 | 15  | 865436  | 276256  | 0 | 4  | 1 | 0 | 33 | 43 | 18195872 | 1.66E-01 | 1 |
| SAMD13    | 226331  | 769 | -12 | 309364  | 78320   | 0 | 3  | 0 | 0 | 50 | 50 | 16186252 | 1.66E-01 | 1 |
| ANKRD55   | 248990  | 402 | 45  | 1580996 | 436456  | 0 | 8  | 2 | 0 | 50 | 53 | 19831692 | 1.66E-01 | 1 |
| FCGR3B    | 645754  | 503 | 22  | 604488  | 162336  | 0 | 4  | 0 | 0 | 50 | 66 | 18965188 | 1.66E-01 | 1 |
| FERD3L    | 103347  | 812 | -15 | 414384  | 124956  | 0 | 5  | 1 | 0 | 6  | 5  | 1796020  | 1.66E-01 | 1 |
| JUN       | 300720  | 419 | 5   | 809188  | 254540  | 0 | 4  | 1 | 0 | 50 | 57 | 21345404 | 1.66E-01 | 1 |
| ARL4A     | 120492  | 469 | -11 | 508724  | 142756  | 0 | 5  | 1 | 0 | 5  | 6  | 1798156  | 1.66E-01 | 1 |
| SUV420H1  | 1059031 | 161 | 51  | 2290860 | 597012  | 0 | 15 | 1 | 0 | 50 | 64 | 19828132 | 1.67E-01 | 1 |
| MKI67     | 408820  | 641 | -1  | 8126412 | 2368824 | 0 | 40 | 7 | 0 | 24 | 30 | 9684268  | 1.67E-01 | 1 |
| SYCP3     | 344663  | 338 | 12  | 691352  | 138484  | 0 | 3  | 0 | 0 | 50 | 56 | 22774388 | 1.67E-01 | 1 |
| STAC3     | 2162032 | 238 | 58  | 975084  | 240300  | 0 | 6  | 2 | 0 | 18 | 36 | 10611648 | 1.67E-01 | 1 |
| MRGPRX1   | 561250  | 695 | 15  | 782132  | 254896  | 0 | 6  | 1 | 0 | 50 | 60 | 19607768 | 1.67E-01 | 1 |
| CAP1      | 873408  | 387 | 23  | 1236388 | 339980  | 0 | 7  | 0 | 0 | 50 | 79 | 27832436 | 1.67E-01 | 1 |
| PPP1CA    | 1269888 | 177 | 51  | 880032  | 241368  | 0 | 5  | 1 | 0 | 31 | 22 | 11381320 | 1.67E-01 | 1 |
| SLC35B2   | 1037256 | 312 | 54  | 1053048 | 347100  | 0 | 5  | 3 | 0 | 44 | 60 | 16584260 | 1.68E-01 | 1 |

|          |         |      |    |         |         |   |    |   |   |    |    |          |          |   |
|----------|---------|------|----|---------|---------|---|----|---|---|----|----|----------|----------|---|
| RNF144A  | 40925   | 1103 | 7  | 767536  | 201140  | 0 | 3  | 0 | 0 | 50 | 51 | 23655132 | 1.68E-01 | 1 |
| DIRC1    | 124843  | 739  | -7 | 264864  | 75828   | 0 | 2  | 0 | 0 | 50 | 51 | 22755520 | 1.68E-01 | 1 |
| EIF4A2   | 449980  | 384  | 25 | 1076188 | 275900  | 0 | 7  | 0 | 0 | 18 | 26 | 8166284  | 1.68E-01 | 1 |
| AHI1     | 152087  | 422  | 29 | 3220376 | 784624  | 0 | 8  | 0 | 0 | 11 | 9  | 6661828  | 1.68E-01 | 1 |
| POLH     | 1221714 | 194  | 46 | 1810616 | 519760  | 0 | 9  | 2 | 0 | 50 | 87 | 24616332 | 1.68E-01 | 1 |
| EHBP1L1  | 3945819 | 202  | 45 | 3750104 | 1209688 | 0 | 13 | 1 | 0 | 19 | 25 | 9711324  | 1.68E-01 | 1 |
| ACOX3    | 138504  | 332  | 47 | 1803852 | 514776  | 0 | 8  | 3 | 0 | 32 | 35 | 12344656 | 1.68E-01 | 1 |
| ZDBF2    | 328087  | 597  | 18 | 5995396 | 1562840 | 0 | 19 | 2 | 0 | 13 | 8  | 6398388  | 1.68E-01 | 1 |
| TTLL5    | 415501  | 540  | 40 | 3334652 | 905308  | 0 | 16 | 2 | 0 | 50 | 52 | 18145320 | 1.68E-01 | 1 |
| PPM1G    | 1244404 | 179  | 39 | 1414744 | 376292  | 0 | 6  | 2 | 0 | 50 | 61 | 21622372 | 1.69E-01 | 1 |
| CORO2B   | 396006  | 603  | 25 | 1246712 | 343540  | 0 | 8  | 2 | 0 | 8  | 11 | 4091152  | 1.69E-01 | 1 |
| ODF1     | 525392  | 236  | 55 | 640444  | 168032  | 0 | 5  | 1 | 0 | 50 | 62 | 22349324 | 1.69E-01 | 1 |
| ATF6     | 407279  | 420  | 16 | 1735856 | 480244  | 0 | 6  | 1 | 0 | 50 | 46 | 16560052 | 1.69E-01 | 1 |
| NDUFA7   | 778783  | 209  | 14 | 290140  | 90068   | 0 | 2  | 1 | 0 | 15 | 26 | 7223240  | 1.69E-01 | 1 |
| RHOBTB3  | 310056  | 242  | 46 | 1601288 | 406552  | 0 | 5  | 0 | 0 | 50 | 55 | 19739844 | 1.69E-01 | 1 |
| CD86     | 557964  | 715  | 39 | 869708  | 213244  | 0 | 6  | 1 | 0 | 50 | 49 | 18745536 | 1.69E-01 | 1 |
| SGPL1    | 424452  | 579  | 30 | 1486656 | 396228  | 0 | 6  | 0 | 0 | 15 | 13 | 5503404  | 1.69E-01 | 1 |
| BZW1     | 620967  | 155  | 38 | 954080  | 227128  | 0 | 4  | 0 | 0 | 50 | 50 | 20122188 | 1.70E-01 | 1 |
| DAPK1    | 141078  | 494  | 26 | 3656476 | 1030976 | 0 | 12 | 1 | 0 | 25 | 15 | 11176976 | 1.70E-01 | 1 |
| C18orf32 | 236267  | 352  | 55 | 203632  | 51620   | 0 | 2  | 0 | 0 | 50 | 49 | 16950940 | 1.70E-01 | 1 |
| HEXB     | 356374  | 567  | 28 | 1450344 | 391956  | 0 | 3  | 0 | 0 | 9  | 3  | 4995392  | 1.70E-01 | 1 |
| MED26    | 898005  | 258  | 42 | 1461380 | 472768  | 0 | 6  | 1 | 0 | 50 | 62 | 27848812 | 1.70E-01 | 1 |
| ATE1     | 233024  | 427  | -3 | 1486656 | 367392  | 0 | 6  | 1 | 0 | 50 | 41 | 19546892 | 1.70E-01 | 1 |
| NAPG     | 191442  | 594  | 17 | 840872  | 208972  | 0 | 3  | 1 | 0 | 50 | 46 | 15692480 | 1.70E-01 | 1 |
| PTGER2   | 405022  | 533  | 18 | 861876  | 292632  | 0 | 6  | 2 | 0 | 20 | 28 | 8124276  | 1.70E-01 | 1 |
| RTAP10-1 | 874480  | 461  | 25 | 622288  | 187256  | 0 | 4  | 1 | 0 | 50 | 76 | 22638396 | 1.70E-01 | 1 |
| RGS10    | 825813  | 217  | 22 | 503384  | 110716  | 0 | 4  | 0 | 0 | 50 | 39 | 14537616 | 1.70E-01 | 1 |
| NEUROD2  | 1164935 | 239  | 28 | 928804  | 302600  | 0 | 3  | 0 | 0 | 50 | 54 | 18916772 | 1.70E-01 | 1 |
| WDR45    | 833689  | NaN  | 41 | 945180  | 257388  | 0 | 7  | 2 | 0 | 14 | 22 | 6888244  | 1.70E-01 | 1 |
| BLM      | 997342  | 176  | 45 | 3682820 | 950164  | 0 | 14 | 3 | 0 | 11 | 7  | 5192616  | 1.70E-01 | 1 |
| IFI27L2  | 200295  | 605  | 47 | 327164  | 109648  | 0 | 2  | 0 | 0 | 50 | 57 | 19244648 | 1.71E-01 | 1 |
| ANGPTL4  | 726988  | 204  | 0  | 1028840 | 300820  | 0 | 7  | 3 | 0 | 22 | 25 | 7295152  | 1.71E-01 | 1 |
| SERHL2   | 969686  | 196  | 65 | 841940  | 216448  | 0 | 4  | 0 | 0 | 50 | 42 | 17941332 | 1.71E-01 | 1 |

|         |         |     |     |         |        |   |    |   |   |    |     |          |          |   |
|---------|---------|-----|-----|---------|--------|---|----|---|---|----|-----|----------|----------|---|
| HLA-E   | 2019724 | 424 | 30  | 918836  | 263440 | 0 | 7  | 2 | 0 | 5  | 4   | 1867576  | 1.71E-01 | 1 |
| WDR38   | 1125524 | 207 | 41  | 808120  | 237452 | 0 | 3  | 1 | 0 | 50 | 59  | 18818160 | 1.71E-01 | 1 |
| ZNHIT6  | 277976  | 411 | -20 | 1250984 | 296548 | 0 | 5  | 1 | 0 | 50 | 47  | 21067724 | 1.72E-01 | 1 |
| TNIP3   | 214178  | 900 | 4   | 894984  | 196512 | 0 | 4  | 1 | 0 | 50 | 60  | 19325816 | 1.72E-01 | 1 |
| PPP4R4  | 204538  | 714 | 17  | 2370604 | 612320 | 0 | 10 | 2 | 0 | 50 | 54  | 19349668 | 1.72E-01 | 1 |
| KPTN    | 797690  | 276 | 38  | 1112500 | 334640 | 0 | 4  | 2 | 0 | 50 | 64  | 22709952 | 1.72E-01 | 1 |
| NGLY1   | 216966  | 701 | -1  | 1799936 | 455680 | 0 | 9  | 2 | 0 | 36 | 50  | 16811744 | 1.72E-01 | 1 |
| RAB6A   | 549152  | 224 | 37  | 652904  | 164116 | 0 | 5  | 0 | 0 | 50 | 53  | 22047792 | 1.72E-01 | 1 |
| PEG3    | NaN     | NaN | NaN | 3749036 | 951232 | 0 | 19 | 5 | 0 | 50 | 121 | 40596816 | 1.72E-01 | 1 |
| SPIB    | 1038277 | 491 | 30  | 665364  | 200784 | 0 | 3  | 1 | 0 | 50 | 64  | 20883672 | 1.73E-01 | 1 |
| RARRES1 | 197614  | 972 | -6  | 758280  | 224280 | 0 | 3  | 1 | 0 | 50 | 41  | 18970528 | 1.73E-01 | 1 |
| SUPT16H | 713944  | 380 | 38  | 2787480 | 677112 | 0 | 13 | 2 | 0 | 17 | 18  | 10392708 | 1.73E-01 | 1 |
| CNTF    | 284768  | 644 | 2   | 505876  | 144536 | 0 | 3  | 0 | 0 | 50 | 42  | 18244644 | 1.73E-01 | 1 |
| OR8H1   | 10317   | 969 | -43 | 769316  | 228196 | 0 | 7  | 0 | 0 | 50 | 80  | 18788256 | 1.73E-01 | 1 |
| MANBAL  | 666037  | 571 | 64  | 217160  | 66928  | 0 | 3  | 0 | 0 | 50 | 57  | 14462144 | 1.73E-01 | 1 |
| QRICH1  | 1848854 | 185 | 39  | 1962628 | 565328 | 0 | 11 | 0 | 0 | 31 | 38  | 14456092 | 1.73E-01 | 1 |
| POLE4   | 642459  | 577 | 26  | 300464  | 92560  | 0 | 1  | 0 | 0 | 50 | 66  | 22434052 | 1.74E-01 | 1 |
| HTR3B   | 182706  | 555 | 9   | 1142404 | 310076 | 0 | 4  | 0 | 0 | 50 | 57  | 22938860 | 1.74E-01 | 1 |
| CYP11B2 | 447193  | 438 | 36  | 1275548 | 375580 | 0 | 11 | 0 | 0 | 1  | 0   | 749380   | 1.74E-01 | 1 |
| DDIT4L  | 193061  | 795 | -8  | 491280  | 138840 | 0 | 2  | 0 | 0 | 50 | 49  | 19714212 | 1.74E-01 | 1 |
| MLF1    | 196830  | 940 | -10 | 722680  | 169100 | 0 | 3  | 1 | 0 | 50 | 46  | 19960920 | 1.74E-01 | 1 |
| TAS2R9  | 408176  | 517 | 12  | 783912  | 223212 | 0 | 4  | 0 | 0 | 50 | 54  | 19041016 | 1.74E-01 | 1 |
| GAD1    | 352183  | 519 | 31  | 1600576 | 415808 | 0 | 8  | 0 | 0 | 34 | 37  | 16005048 | 1.75E-01 | 1 |
| TOX3    | 62431   | 993 | -53 | 1535784 | 425064 | 0 | 9  | 1 | 0 | 50 | 57  | 18957712 | 1.75E-01 | 1 |
| STRBP   | 341358  | 431 | 29  | 1744400 | 480244 | 0 | 5  | 0 | 0 | 50 | 49  | 24462184 | 1.75E-01 | 1 |
| SOD1    | 268523  | 621 | 34  | 402992  | 110716 | 0 | 3  | 1 | 0 | 41 | 43  | 10847320 | 1.75E-01 | 1 |
| PURB    | 1107527 | 219 | 54  | 762196  | 242792 | 0 | 6  | 0 | 0 | 22 | 38  | 12614148 | 1.75E-01 | 1 |
| ARF5    | 411207  | 619 | -7  | 472412  | 131008 | 0 | 2  | 0 | 0 | 50 | 41  | 15048476 | 1.75E-01 | 1 |
| BRI3BP  | 1000229 | 229 | 37  | 610184  | 205768 | 0 | 5  | 0 | 0 | 50 | 54  | 18508084 | 1.75E-01 | 1 |
| AFF4    | 686574  | 200 | 66  | 3010692 | 804204 | 0 | 19 | 1 | 0 | 10 | 8   | 3264876  | 1.75E-01 | 1 |
| MAGED2  | 257482  | NaN | 20  | 1544328 | 451764 | 0 | 6  | 0 | 0 | 14 | 13  | 5035976  | 1.75E-01 | 1 |
| DEPDC4  | 184616  | 650 | 3   | 767892  | 196512 | 0 | 5  | 1 | 0 | 7  | 8   | 3126748  | 1.76E-01 | 1 |
| EDN1    | 198728  | 410 | 27  | 561056  | 138484 | 0 | 2  | 0 | 0 | 50 | 47  | 20597804 | 1.76E-01 | 1 |

|          |         |      |     |         |         |   |    |   |   |    |     |          |          |   |
|----------|---------|------|-----|---------|---------|---|----|---|---|----|-----|----------|----------|---|
| KRTAP9-4 | 1149433 | 468  | -14 | 396584  | 102172  | 0 | 2  | 0 | 0 | 50 | 53  | 16834528 | 1.76E-01 | 1 |
| ADM      | 860704  | 273  | 12  | 463156  | 145604  | 0 | 3  | 1 | 0 | 50 | 82  | 24173468 | 1.76E-01 | 1 |
| PNOC     | 311812  | 229  | 35  | 457816  | 122108  | 0 | 2  | 0 | 0 | 50 | 47  | 16612028 | 1.76E-01 | 1 |
| ZNF263   | 1397628 | 303  | 32  | 1732296 | 480600  | 0 | 8  | 3 | 0 | 50 | 92  | 23311236 | 1.76E-01 | 1 |
| CLLU1OS  | 168575  | 582  | 19  | 269492  | 72268   | 0 | 1  | 0 | 0 | 50 | 43  | 17827412 | 1.76E-01 | 1 |
| Clorf146 | 304492  | 524  | -3  | 480956  | 120328  | 0 | 4  | 0 | 0 | 50 | 78  | 22918568 | 1.76E-01 | 1 |
| NISCH    | 1096247 | 192  | 55  | 3772888 | 1134572 | 0 | 9  | 0 | 0 | 3  | 0   | 2294420  | 1.77E-01 | 1 |
| DCUN1D2  | 806605  | 318  | 46  | 696692  | 164116  | 0 | 5  | 0 | 0 | 50 | 70  | 24417328 | 1.77E-01 | 1 |
| DEK      | 467694  | 497  | 4   | 1021008 | 226416  | 0 | 5  | 0 | 0 | 50 | 49  | 19195520 | 1.77E-01 | 1 |
| DDA1     | 842088  | 211  | 43  | 276612  | 70488   | 0 | 1  | 0 | 0 | 50 | 61  | 21639816 | 1.77E-01 | 1 |
| PYDC2    | 101042  | 886  | 13  | 244928  | 66928   | 0 | 1  | 0 | 0 | 50 | 71  | 21387768 | 1.77E-01 | 1 |
| CEP57    | 298879  | 467  | 2   | 1325388 | 322536  | 0 | 6  | 1 | 0 | 50 | 62  | 25030360 | 1.77E-01 | 1 |
| CD160    | NaN     | NaN  | NaN | 472412  | 127804  | 0 | 2  | 0 | 0 | 50 | 116 | 39773388 | 1.77E-01 | 1 |
| OR1J2    | 373314  | 646  | 3   | 768604  | 236384  | 0 | 4  | 0 | 0 | 50 | 63  | 22349324 | 1.78E-01 | 1 |
| HOXA1    | 356045  | 385  | 28  | 852976  | 229976  | 0 | 4  | 1 | 0 | 9  | 4   | 2886804  | 1.78E-01 | 1 |
| CLEC1B   | 305376  | 565  | 19  | 615168  | 145248  | 0 | 4  | 1 | 0 | 5  | 5   | 2335716  | 1.78E-01 | 1 |
| LRRC57   | 534369  | 269  | 40  | 614456  | 175864  | 0 | 4  | 2 | 0 | 13 | 10  | 3998236  | 1.78E-01 | 1 |
| DUSP14   | 541310  | 201  | 29  | 491636  | 150232  | 0 | 3  | 0 | 0 | 50 | 93  | 26971628 | 1.78E-01 | 1 |
| GGNBP2   | 468055  | 548  | 23  | 1837672 | 449984  | 0 | 8  | 1 | 0 | 31 | 37  | 13224332 | 1.78E-01 | 1 |
| CHIA     | 398726  | 559  | 15  | 1247068 | 330368  | 0 | 7  | 1 | 0 | 50 | 61  | 21076268 | 1.78E-01 | 1 |
| GABRB2   | 11638   | 1049 | 7   | 1323608 | 358492  | 0 | 6  | 2 | 0 | 16 | 16  | 8430436  | 1.78E-01 | 1 |
| TAF1D    | 290677  | 527  | 0   | 735852  | 179424  | 0 | 4  | 1 | 0 | 50 | 59  | 19845576 | 1.78E-01 | 1 |
| ABCA12   | 526764  | 857  | 9   | 6761864 | 1808836 | 0 | 22 | 3 | 0 | 2  | 8   | 4606640  | 1.79E-01 | 1 |
| FAM45A   | 721947  | 194  | 19  | 933432  | 249912  | 0 | 4  | 2 | 0 | 9  | 12  | 4359220  | 1.79E-01 | 1 |
| RIT2     | 4853    | 1195 | -57 | 573872  | 141688  | 0 | 5  | 1 | 0 | 29 | 63  | 13463564 | 1.79E-01 | 1 |
| TOB1     | 1152451 | 161  | 15  | 874336  | 236384  | 0 | 5  | 1 | 0 | 34 | 34  | 10998264 | 1.79E-01 | 1 |
| DTNB     | 367255  | 356  | 44  | 1666080 | 430404  | 0 | 6  | 1 | 0 | 50 | 49  | 21271000 | 1.79E-01 | 1 |
| NPFFR2   | 17885   | 811  | 3   | 1338204 | 356712  | 0 | 5  | 1 | 0 | 50 | 55  | 21841668 | 1.79E-01 | 1 |
| HOXA2    | 356045  | 385  | 28  | 935568  | 276612  | 0 | 3  | 0 | 0 | 50 | 46  | 22711376 | 1.79E-01 | 1 |
| IL22RA1  | 812508  | 235  | 33  | 1427204 | 442864  | 0 | 6  | 1 | 0 | 50 | 55  | 19026776 | 1.79E-01 | 1 |
| GPR50    | 215822  | NaN  | -7  | 1520832 | 465648  | 0 | 8  | 1 | 0 | 50 | 90  | 28179180 | 1.79E-01 | 1 |
| MOBP     | 161535  | 694  | 18  | 225704  | 45568   | 0 | 1  | 0 | 0 | 50 | 60  | 18461448 | 1.79E-01 | 1 |
| CLSTN2   | 93930   | 998  | 9   | 2475624 | 655752  | 0 | 12 | 2 | 0 | 50 | 68  | 26595692 | 1.79E-01 | 1 |



|            |         |      |     |         |         |   |    |   |   |    |    |          |          |   |
|------------|---------|------|-----|---------|---------|---|----|---|---|----|----|----------|----------|---|
| HNRNPU     | 695318  | 417  | 6   | 2147036 | 555004  | 0 | 9  | 0 | 0 | 31 | 26 | 10348208 | 1.79E-01 | 1 |
| HOMER1     | 177305  | 593  | 37  | 930940  | 240656  | 0 | 5  | 1 | 0 | 50 | 51 | 17585332 | 1.79E-01 | 1 |
| PLXDC2     | 19386   | 1014 | -10 | 1386620 | 367036  | 0 | 6  | 2 | 0 | 50 | 69 | 22876204 | 1.79E-01 | 1 |
| HOXA7      | 356045  | 385  | 28  | 577076  | 167320  | 0 | 3  | 0 | 0 | 50 | 46 | 22711376 | 1.79E-01 | 1 |
| OR10A6     | 105341  | 679  | 6   | 775724  | 232468  | 0 | 5  | 1 | 0 | 50 | 63 | 24898284 | 1.79E-01 | 1 |
| RPF2       | 343624  | 410  | 29  | 823784  | 202564  | 0 | 4  | 0 | 0 | 50 | 55 | 23354668 | 1.80E-01 | 1 |
| MED27      | 593548  | 566  | 29  | 808120  | 223568  | 0 | 4  | 1 | 0 | 50 | 59 | 20495632 | 1.80E-01 | 1 |
| STXBP1     | 1015071 | 168  | 40  | 1666436 | 440728  | 0 | 7  | 1 | 0 | 50 | 78 | 28271384 | 1.80E-01 | 1 |
| GAR1       | 212757  | 462  | 28  | 556784  | 167320  | 0 | 4  | 0 | 0 | 50 | 47 | 18097260 | 1.80E-01 | 1 |
| HEG1       | 367509  | 177  | 50  | 3421872 | 1076544 | 0 | 10 | 2 | 0 | 44 | 34 | 15323664 | 1.80E-01 | 1 |
| BTBD10     | 285926  | 458  | 10  | 1232828 | 326452  | 0 | 7  | 1 | 0 | 50 | 44 | 22190904 | 1.80E-01 | 1 |
| TBL1Y      | 0       | 0    | 0   | 1380212 | 355288  | 0 | 5  | 0 | 0 | 50 | 39 | 21173456 | 1.80E-01 | 1 |
| ATP6V1G2   | 2517285 | 220  | 35  | 312212  | 81880   | 0 | 1  | 0 | 0 | 50 | 55 | 21824936 | 1.81E-01 | 1 |
| KIF12      | 244063  | 558  | 0   | 1300824 | 405840  | 0 | 5  | 2 | 0 | 50 | 54 | 18649060 | 1.81E-01 | 1 |
| MORF4L1    | 482778  | 413  | 50  | 971880  | 242436  | 0 | 4  | 0 | 0 | 50 | 71 | 21518064 | 1.81E-01 | 1 |
| DBT        | 314135  | 495  | 9   | 1250628 | 341760  | 0 | 5  | 0 | 0 | 31 | 33 | 14180904 | 1.81E-01 | 1 |
| PRDM5      | 19279   | 961  | -16 | 1697408 | 388396  | 0 | 11 | 0 | 0 | 8  | 8  | 2874700  | 1.81E-01 | 1 |
| F11R       | 777836  | 441  | 19  | 778216  | 221432  | 0 | 6  | 0 | 0 | 50 | 69 | 22066304 | 1.81E-01 | 1 |
| DPYSL2     | 207566  | 520  | 26  | 1473484 | 417944  | 0 | 4  | 0 | 0 | 32 | 23 | 11871888 | 1.81E-01 | 1 |
| RBMS3      | 30243   | 808  | -11 | 1199720 | 311500  | 0 | 4  | 2 | 0 | 20 | 30 | 11536180 | 1.82E-01 | 1 |
| OR51B5     | 100115  | 1056 | 1   | 762552  | 240300  | 0 | 3  | 0 | 0 | 50 | 49 | 17770808 | 1.82E-01 | 1 |
| MEIS2      | 74106   | 628  | -7  | 1318624 | 332504  | 0 | 5  | 0 | 0 | 50 | 49 | 21327604 | 1.82E-01 | 1 |
| IDH3A      | 395288  | 314  | 50  | 961200  | 259524  | 0 | 3  | 1 | 0 | 50 | 60 | 20999016 | 1.82E-01 | 1 |
| FAM19A2    | 136152  | 930  | -44 | 349592  | 89356   | 0 | 2  | 0 | 0 | 50 | 70 | 16949160 | 1.82E-01 | 1 |
| ABHD10     | 239044  | 250  | 10  | 779996  | 222856  | 0 | 5  | 0 | 0 | 50 | 64 | 21098340 | 1.82E-01 | 1 |
| OR4X1      | 400891  | 509  | -27 | 754364  | 224992  | 0 | 5  | 1 | 0 | 50 | 74 | 19622364 | 1.82E-01 | 1 |
| SKIV2L     | 2314693 | 203  | 34  | 3144548 | 970456  | 0 | 7  | 0 | 0 | 3  | 0  | 2076192  | 1.82E-01 | 1 |
| CHIT1      | 507603  | 453  | 31  | 1210400 | 330724  | 0 | 7  | 1 | 0 | 50 | 72 | 22933520 | 1.82E-01 | 1 |
| IIST2H2A(C | 798975  | 560  | 17  | 311856  | 106800  | 0 | 3  | 1 | 0 | 21 | 23 | 6253852  | 1.82E-01 | 1 |
| ATP6V1A    | 442365  | 364  | 33  | 1604492 | 435388  | 0 | 10 | 2 | 0 | 50 | 45 | 18104024 | 1.82E-01 | 1 |
| CLIP4      | 383097  | 497  | 32  | 1823788 | 502316  | 0 | 7  | 2 | 0 | 40 | 30 | 13361036 | 1.83E-01 | 1 |
| MCCC2      | 436559  | 600  | 36  | 1470636 | 404772  | 0 | 8  | 0 | 0 | 50 | 78 | 22903260 | 1.83E-01 | 1 |
| CHD2       | 243747  | 332  | 14  | 4826292 | 1198296 | 0 | 18 | 1 | 0 | 1  | 1  | 1329660  | 1.83E-01 | 1 |

|          |         |      |     |          |         |   |    |    |   |    |    |          |          |   |
|----------|---------|------|-----|----------|---------|---|----|----|---|----|----|----------|----------|---|
| COPB2    | 246935  | 671  | 15  | 2382352  | 613388  | 0 | 7  | 2  | 0 | 50 | 63 | 23934592 | 1.83E-01 | 1 |
| HBG1     | 109545  | 1056 | -1  | 377716   | 109292  | 0 | 2  | 0  | 0 | 50 | 50 | 17996156 | 1.83E-01 | 1 |
| SURF1    | 1827885 | 416  | 28  | 771096   | 233892  | 0 | 2  | 1  | 0 | 50 | 47 | 17145316 | 1.83E-01 | 1 |
| FCHO1    | 1181745 | 246  | 21  | 2292996  | 684588  | 0 | 12 | 2  | 0 | 30 | 42 | 15709212 | 1.83E-01 | 1 |
| NEDD8    | 944836  | 220  | 40  | 218228   | 58384   | 0 | 2  | 0  | 0 | 50 | 68 | 23143916 | 1.84E-01 | 1 |
| SCRN3    | 385177  | 419  | 24  | 1111432  | 280172  | 0 | 3  | 1  | 0 | 50 | 52 | 25814628 | 1.84E-01 | 1 |
| RBMXL2   | 354782  | 922  | -11 | 932720   | 326452  | 0 | 4  | 1  | 0 | 50 | 59 | 17749092 | 1.84E-01 | 1 |
| GUCA1B   | 524386  | 273  | 43  | 527236   | 129584  | 0 | 2  | 0  | 0 | 50 | 56 | 22267444 | 1.84E-01 | 1 |
| GLUD2    | 339278  | NaN  | -6  | 1381636  | 411536  | 0 | 9  | 1  | 0 | 25 | 26 | 8703844  | 1.84E-01 | 1 |
| VSIG10   | 637549  | 608  | 17  | 1378076  | 389464  | 0 | 6  | 1  | 0 | 28 | 32 | 10905704 | 1.84E-01 | 1 |
| CYP4A11  | 492091  | 578  | 5   | 1341408  | 373800  | 0 | 7  | 2  | 0 | 50 | 61 | 22411268 | 1.84E-01 | 1 |
| RNF213   | 718251  | 198  | 24  | 13542952 | 3763988 | 0 | 38 | 12 | 0 | 32 | 41 | 17457172 | 1.84E-01 | 1 |
| C20orf85 | 372863  | 576  | 7   | 358848   | 98256   | 0 | 2  | 1  | 0 | 48 | 65 | 22614900 | 1.85E-01 | 1 |
| DEFB128  | 215351  | 430  | 25  | 243148   | 62300   | 0 | 1  | 0  | 0 | 50 | 54 | 17273476 | 1.85E-01 | 1 |
| TAC3     | 2026922 | 199  | 41  | 333216   | 82236   | 0 | 3  | 0  | 0 | 50 | 67 | 21271000 | 1.85E-01 | 1 |
| NXPH1    | 85530   | 915  | -11 | 690996   | 184764  | 0 | 5  | 1  | 0 | 31 | 51 | 17486364 | 1.85E-01 | 1 |
| IPPK     | 587288  | 484  | 46  | 1287652  | 339980  | 0 | 4  | 0  | 0 | 22 | 14 | 9751908  | 1.85E-01 | 1 |
| CSN3     | 201562  | 928  | 3   | 462088   | 141332  | 0 | 4  | 0  | 0 | 50 | 70 | 21109020 | 1.85E-01 | 1 |
| PXMP2    | 724450  | 495  | 35  | 494128   | 153080  | 0 | 2  | 0  | 0 | 50 | 61 | 25012204 | 1.85E-01 | 1 |
| ATP5C1   | 199228  | 475  | 16  | 796372   | 208616  | 0 | 4  | 0  | 0 | 50 | 52 | 19143900 | 1.85E-01 | 1 |
| RPGR     | 141269  | NaN  | 28  | 3501972  | 846924  | 0 | 9  | 0  | 0 | 16 | 11 | 9880424  | 1.85E-01 | 1 |
| CEACAM6  | 1341589 | 499  | 16  | 865080   | 261660  | 0 | 5  | 2  | 0 | 29 | 24 | 8609148  | 1.85E-01 | 1 |
| CRTP2    | 22916   | 1048 | -79 | 126380   | 29548   | 0 | 2  | 0  | 0 | 50 | 84 | 16257808 | 1.86E-01 | 1 |
| EML1     | 528390  | 354  | 10  | 2174092  | 597368  | 0 | 9  | 1  | 0 | 11 | 20 | 7106116  | 1.86E-01 | 1 |
| CNIH3    | 408298  | 633  | -5  | 430760   | 106444  | 0 | 2  | 0  | 0 | 50 | 60 | 19671848 | 1.86E-01 | 1 |
| PAK2     | 798731  | 446  | 41  | 1380568  | 361340  | 0 | 8  | 0  | 0 | 26 | 27 | 9472804  | 1.86E-01 | 1 |
| CXCL10   | 489826  | 399  | 43  | 263440   | 68708   | 0 | 2  | 0  | 0 | 50 | 51 | 20872992 | 1.86E-01 | 1 |
| GSTM1    | 927739  | 201  | 22  | 595944   | 137772  | 0 | 2  | 0  | 0 | 50 | 50 | 14380264 | 1.86E-01 | 1 |
| HDAC11   | 370030  | 199  | 39  | 897476   | 262372  | 0 | 5  | 0  | 0 | 50 | 54 | 21713508 | 1.86E-01 | 1 |
| ROPN1L   | 628188  | 219  | 21  | 598080   | 161268  | 0 | 3  | 1  | 0 | 26 | 33 | 10568216 | 1.87E-01 | 1 |
| SLC10A2  | 199120  | 713  | 24  | 882880   | 256676  | 0 | 7  | 1  | 0 | 6  | 94 | 28179180 | 1.87E-01 | 1 |
| C11orf63 | 675003  | 416  | 7   | 2063020  | 533288  | 0 | 9  | 2  | 0 | 43 | 43 | 15370656 | 1.87E-01 | 1 |
| TUBG1    | 1884163 | 177  | 38  | 1166612  | 324316  | 0 | 6  | 1  | 0 | 50 | 68 | 23826724 | 1.87E-01 | 1 |

|          |         |      |     |         |         |   |    |   |   |    |     |          |          |   |
|----------|---------|------|-----|---------|---------|---|----|---|---|----|-----|----------|----------|---|
| ORAOV1   | 441431  | 536  | 41  | 374156  | 85084   | 0 | 2  | 1 | 0 | 50 | 63  | 20424076 | 1.87E-01 | 1 |
| BOLA1    | 798975  | 560  | 17  | 327520  | 118904  | 0 | 2  | 1 | 0 | 21 | 23  | 6253852  | 1.87E-01 | 1 |
| GNG4     | 565883  | 457  | 16  | 199716  | 52332   | 0 | 2  | 0 | 0 | 50 | 72  | 21697844 | 1.87E-01 | 1 |
| PENK     | 411547  | 624  | -16 | 687436  | 181916  | 0 | 4  | 1 | 0 | 50 | 39  | 17028548 | 1.87E-01 | 1 |
| ZNF485   | 310272  | 630  | -6  | 1150592 | 282664  | 0 | 5  | 2 | 0 | 41 | 36  | 15733776 | 1.87E-01 | 1 |
| AMOTL2   | 303429  | 189  | 21  | 1930944 | 609828  | 0 | 9  | 1 | 0 | 34 | 37  | 17612032 | 1.87E-01 | 1 |
| GPR171   | NaN     | NaN  | NaN | 808120  | 221432  | 0 | 2  | 1 | 0 | 50 | 117 | 39867016 | 1.88E-01 | 1 |
| BATF3    | 399829  | 364  | 30  | 325740  | 92916   | 0 | 2  | 0 | 0 | 50 | 43  | 21174168 | 1.88E-01 | 1 |
| HMG1     | 383982  | 346  | 44  | 276256  | 68708   | 0 | 2  | 0 | 0 | 50 | 50  | 21398804 | 1.88E-01 | 1 |
| CIDEA    | 428253  | 350  | 20  | 668924  | 206836  | 0 | 3  | 1 | 0 | 50 | 53  | 21052416 | 1.88E-01 | 1 |
| UMPS     | 307759  | 254  | 36  | 1202568 | 359916  | 0 | 5  | 0 | 0 | 27 | 17  | 9052368  | 1.88E-01 | 1 |
| FAM174A  | 23650   | 1030 | 13  | 463512  | 156996  | 0 | 2  | 0 | 0 | 50 | 68  | 24788992 | 1.88E-01 | 1 |
| RBAK     | 1723793 | 462  | 34  | 1874340 | 433608  | 0 | 11 | 0 | 0 | 12 | 8   | 4310448  | 1.89E-01 | 1 |
| HDGFL1   | 11748   | 925  | -14 | 629764  | 177644  | 0 | 3  | 0 | 0 | 50 | 75  | 24054564 | 1.89E-01 | 1 |
| DEFB124  | 605825  | 450  | -76 | 183696  | 51264   | 0 | 1  | 0 | 0 | 50 | 111 | 28209084 | 1.89E-01 | 1 |
| GPR37L1  | 704755  | 156  | 27  | 1169816 | 380920  | 0 | 4  | 1 | 0 | 34 | 26  | 15189808 | 1.89E-01 | 1 |
| IFRD1    | 166238  | 412  | -4  | 1185124 | 310076  | 0 | 4  | 0 | 0 | 50 | 48  | 19834896 | 1.89E-01 | 1 |
| RPS6     | 498767  | 339  | 12  | 644004  | 182628  | 0 | 5  | 2 | 0 | 12 | 30  | 7585292  | 1.89E-01 | 1 |
| NPPC     | 893534  | 439  | 33  | 301532  | 109648  | 0 | 2  | 0 | 0 | 50 | 51  | 22395960 | 1.89E-01 | 1 |
| C1orf186 | 755856  | 400  | 10  | 460308  | 115344  | 0 | 2  | 1 | 0 | 34 | 28  | 10062696 | 1.90E-01 | 1 |
| KIAA2018 | 453036  | 419  | 24  | 5582436 | 1635108 | 0 | 27 | 2 | 0 | 1  | 5   | 2682816  | 1.90E-01 | 1 |
| CPS1     | 158852  | 465  | -1  | 3913152 | 1079748 | 0 | 13 | 1 | 0 | 5  | 6   | 3961924  | 1.90E-01 | 1 |
| FAM175B  | 290823  | 200  | 36  | 1093276 | 275900  | 0 | 6  | 3 | 0 | 16 | 19  | 4564276  | 1.90E-01 | 1 |
| TMX4     | 72842   | 609  | -25 | 911716  | 239588  | 0 | 7  | 1 | 0 | 50 | 83  | 21755516 | 1.90E-01 | 1 |
| B3GALT4  | 1456953 | 262  | 30  | 900324  | 313992  | 0 | 6  | 3 | 0 | 20 | 43  | 9065896  | 1.91E-01 | 1 |
| RSU1     | 506025  | 792  | 1   | 734428  | 190460  | 0 | 3  | 0 | 0 | 50 | 53  | 22357868 | 1.91E-01 | 1 |
| ICA1     | 176442  | 544  | 19  | 1296552 | 313992  | 0 | 5  | 0 | 0 | 50 | 40  | 19343616 | 1.91E-01 | 1 |
| FAM166A  | 1724821 | 399  | 43  | 826632  | 220008  | 0 | 7  | 0 | 0 | 50 | 60  | 16636592 | 1.91E-01 | 1 |
| PRPF3    | 1301004 | 182  | 34  | 1774304 | 481312  | 0 | 9  | 2 | 0 | 34 | 57  | 16988320 | 1.91E-01 | 1 |
| USP48    | 510117  | 181  | 30  | 2778224 | 658600  | 0 | 11 | 1 | 0 | 18 | 25  | 8029580  | 1.91E-01 | 1 |
| FAM104A  | 205112  | 251  | -15 | 524032  | 157352  | 0 | 2  | 0 | 0 | 50 | 58  | 23675068 | 1.92E-01 | 1 |
| SRD5A2   | 157835  | 693  | 3   | 639020  | 196156  | 0 | 2  | 1 | 0 | 38 | 33  | 15232172 | 1.92E-01 | 1 |
| FAM111B  | 437114  | 741  | -6  | 1898904 | 464580  | 0 | 10 | 1 | 0 | 49 | 54  | 18637312 | 1.92E-01 | 1 |

|          |         |      |     |         |         |   |    |   |   |    |     |          |          |   |
|----------|---------|------|-----|---------|---------|---|----|---|---|----|-----|----------|----------|---|
| RAC1     | NaN     | NaN  | NaN | 550020  | 154860  | 0 | 4  | 0 | 0 | 50 | 116 | 39800444 | 1.92E-01 | 1 |
| VTI1B    | 479937  | 260  | 39  | 598080  | 169812  | 0 | 4  | 0 | 0 | 50 | 42  | 17838804 | 1.92E-01 | 1 |
| PTCH1    | 186893  | 510  | 53  | 3825576 | 1129944 | 0 | 18 | 2 | 0 | 28 | 29  | 12660784 | 1.92E-01 | 1 |
| TMEM92   | 1297691 | 196  | 28  | 414384  | 121752  | 0 | 2  | 0 | 0 | 50 | 80  | 24625588 | 1.93E-01 | 1 |
| ZSCAN20  | 349443  | 614  | 31  | 2659320 | 711288  | 0 | 8  | 2 | 0 | 32 | 41  | 18254968 | 1.93E-01 | 1 |
| SLAMF8   | 802263  | 403  | 6   | 714848  | 218584  | 0 | 4  | 0 | 0 | 36 | 37  | 12550780 | 1.93E-01 | 1 |
| ROBO4    | 175852  | 743  | 14  | 2494136 | 808120  | 0 | 8  | 3 | 0 | 50 | 63  | 23580016 | 1.93E-01 | 1 |
| ZNF567   | 610659  | 922  | -38 | 1597728 | 391956  | 0 | 10 | 3 | 0 | 50 | 74  | 18264580 | 1.93E-01 | 1 |
| ZNF395   | 289053  | 229  | 44  | 1286584 | 398720  | 0 | 5  | 1 | 0 | 50 | 53  | 18820296 | 1.93E-01 | 1 |
| TSGA13   | 278944  | 433  | 9   | 727664  | 182272  | 0 | 3  | 1 | 0 | 50 | 44  | 20053836 | 1.93E-01 | 1 |
| COX7B    | 549293  | NaN  | 19  | 215024  | 55180   | 0 | 2  | 0 | 0 | 50 | 74  | 23808568 | 1.93E-01 | 1 |
| KDM5B    | 463071  | 378  | 35  | 3985064 | 1076188 | 0 | 12 | 3 | 0 | 50 | 50  | 19503104 | 1.94E-01 | 1 |
| SKAP1    | 1097775 | 588  | 4   | 979712  | 224992  | 0 | 4  | 2 | 0 | 11 | 7   | 3179080  | 1.94E-01 | 1 |
| MAF1     | 2720766 | 211  | 27  | 685300  | 168032  | 0 | 3  | 0 | 0 | 50 | 67  | 26365716 | 1.94E-01 | 1 |
| SLC13A5  | 800049  | 424  | 7   | 1442512 | 429692  | 0 | 5  | 1 | 0 | 42 | 30  | 12306920 | 1.94E-01 | 1 |
| GPR75    | NaN     | NaN  | NaN | 1331440 | 401924  | 0 | 9  | 3 | 0 | 26 | 43  | 11979044 | 1.94E-01 | 1 |
| C1orf158 | 141239  | 571  | 18  | 502316  | 135280  | 0 | 3  | 1 | 0 | 11 | 8   | 2696344  | 1.94E-01 | 1 |
| CYBA     | 802673  | 189  | 41  | 496264  | 157352  | 0 | 2  | 0 | 0 | 50 | 65  | 20750172 | 1.94E-01 | 1 |
| ADAM10   | 506165  | 386  | 31  | 1975800 | 488076  | 0 | 11 | 1 | 0 | 12 | 12  | 6472080  | 1.94E-01 | 1 |
| C18orf25 | 413073  | 142  | 58  | 1014956 | 296548  | 0 | 4  | 2 | 0 | 50 | 68  | 20965908 | 1.95E-01 | 1 |
| HNRNPAB  | 672705  | 448  | 46  | 877896  | 223212  | 0 | 3  | 0 | 0 | 50 | 73  | 25444744 | 1.95E-01 | 1 |
| KIAA1045 | 676166  | 394  | 23  | 1018872 | 295836  | 0 | 9  | 2 | 0 | 22 | 39  | 12320092 | 1.95E-01 | 1 |
| DEFB123  | 605825  | 450  | -76 | 182984  | 43432   | 0 | 1  | 0 | 0 | 50 | 111 | 28209084 | 1.95E-01 | 1 |
| EXOSC5   | 1148529 | 249  | 36  | 590960  | 188680  | 0 | 4  | 0 | 0 | 50 | 39  | 16082656 | 1.95E-01 | 1 |
| DDI2     | 677127  | 162  | 28  | 1035248 | 286936  | 0 | 5  | 0 | 0 | 9  | 10  | 4870792  | 1.95E-01 | 1 |
| GIGYF2   | 325071  | 328  | 35  | 3479188 | 878252  | 0 | 8  | 2 | 0 | 50 | 41  | 18336848 | 1.95E-01 | 1 |
| EPB41L3  | 57432   | 1036 | -5  | 2789260 | 790676  | 0 | 15 | 1 | 0 | 1  | 2   | 1414744  | 1.95E-01 | 1 |
| APH1A    | 1213150 | 197  | 38  | 672128  | 215380  | 0 | 3  | 0 | 0 | 50 | 58  | 21071640 | 1.96E-01 | 1 |
| PVRL1    | 744818  | 555  | 30  | 1660028 | 493060  | 0 | 5  | 1 | 0 | 50 | 74  | 24278488 | 1.96E-01 | 1 |
| GABRR1   | 398929  | 446  | 29  | 1253476 | 322892  | 0 | 6  | 0 | 0 | 50 | 42  | 25327620 | 1.96E-01 | 1 |
| SPOP     | 943930  | 348  | 28  | 987900  | 252048  | 0 | 5  | 1 | 0 | 50 | 62  | 18842012 | 1.96E-01 | 1 |
| MMEL1    | 323457  | 335  | 30  | 2052696 | 546816  | 0 | 6  | 3 | 0 | 35 | 31  | 12502364 | 1.96E-01 | 1 |
| NFS1     | 1423559 | 169  | 53  | 1178360 | 344608  | 0 | 6  | 0 | 0 | 15 | 12  | 5442528  | 1.96E-01 | 1 |

|         |         |      |     |         |         |   |    |   |   |    |    |          |          |   |
|---------|---------|------|-----|---------|---------|---|----|---|---|----|----|----------|----------|---|
| OR4A15  | 1067    | 1102 | -42 | 855468  | 248844  | 0 | 8  | 2 | 0 | 9  | 13 | 3819524  | 1.96E-01 | 1 |
| GSG1    | 692979  | 203  | 5   | 1120332 | 212532  | 0 | 6  | 0 | 0 | 50 | 56 | 21266372 | 1.96E-01 | 1 |
| MRFAP1  | 501655  | 278  | 47  | 322892  | 91492   | 0 | 1  | 0 | 0 | 50 | 50 | 19690004 | 1.96E-01 | 1 |
| PDE5A   | 183496  | 900  | -6  | 2349956 | 572092  | 0 | 9  | 2 | 0 | 50 | 49 | 20043512 | 1.96E-01 | 1 |
| SNRNP48 | 825677  | 209  | 14  | 910292  | 215380  | 0 | 4  | 0 | 0 | 50 | 60 | 21797880 | 1.97E-01 | 1 |
| FAM179B | 231363  | 490  | 1   | 4331096 | 1259884 | 0 | 19 | 3 | 0 | 44 | 52 | 20638032 | 1.97E-01 | 1 |
| ARGFX   | 289448  | 613  | 18  | 805984  | 223568  | 0 | 2  | 0 | 0 | 50 | 42 | 24871584 | 1.97E-01 | 1 |
| MPL     | 1088321 | 252  | 27  | 1609832 | 477040  | 0 | 6  | 1 | 0 | 50 | 56 | 22185208 | 1.97E-01 | 1 |
| DKK3    | 324993  | 243  | 11  | 902460  | 254184  | 0 | 6  | 1 | 0 | 50 | 58 | 21244656 | 1.97E-01 | 1 |
| FAM3C   | 100604  | 535  | -1  | 620152  | 148808  | 0 | 3  | 0 | 0 | 50 | 67 | 24128968 | 1.97E-01 | 1 |
| MCF2L2  | 398145  | 606  | 24  | 2949104 | 749380  | 0 | 11 | 1 | 0 | 13 | 9  | 5241032  | 1.98E-01 | 1 |
| PRR15L  | 1183803 | 203  | 21  | 263440  | 74048   | 0 | 1  | 0 | 0 | 50 | 60 | 21372816 | 1.98E-01 | 1 |
| RAB5A   | 103261  | 609  | -8  | 565328  | 148096  | 0 | 3  | 0 | 0 | 50 | 53 | 19967684 | 1.98E-01 | 1 |
| CBR4    | 174340  | 258  | 16  | 606980  | 172660  | 0 | 2  | 0 | 0 | 50 | 38 | 16291628 | 1.98E-01 | 1 |
| SLC39A8 | 275900  | 441  | 4   | 1253476 | 357068  | 0 | 4  | 0 | 0 | 16 | 7  | 5590980  | 1.98E-01 | 1 |
| CRNN    | 387153  | 671  | 6   | 1243152 | 354576  | 0 | 3  | 0 | 0 | 3  | 1  | 2462096  | 1.98E-01 | 1 |
| NT5E    | 393239  | 321  | 13  | 1462804 | 413672  | 0 | 8  | 2 | 0 | 17 | 13 | 5725904  | 1.98E-01 | 1 |
| IL21R   | 228256  | 597  | 36  | 1359564 | 401568  | 0 | 6  | 0 | 0 | 23 | 21 | 9360308  | 1.98E-01 | 1 |
| USP47   | 327690  | 317  | 17  | 3406208 | 831616  | 0 | 11 | 3 | 0 | 17 | 19 | 9430084  | 1.98E-01 | 1 |
| GKN1    | 338803  | 222  | 16  | 532576  | 131720  | 0 | 2  | 1 | 0 | 37 | 38 | 15321884 | 1.98E-01 | 1 |
| RNF220  | 742455  | 355  | 34  | 1458888 | 413316  | 0 | 6  | 0 | 0 | 42 | 42 | 17956284 | 1.98E-01 | 1 |
| YIPF1   | 505734  | 319  | 24  | 801356  | 220720  | 0 | 5  | 0 | 0 | 22 | 25 | 7631928  | 1.99E-01 | 1 |
| EXOC4   | 618702  | 965  | 12  | 2526888 | 679248  | 0 | 13 | 1 | 0 | 2  | 1  | 1171596  | 1.99E-01 | 1 |
| HS3ST2  | 432670  | 708  | 14  | 896408  | 289072  | 0 | 5  | 1 | 0 | 50 | 66 | 21351100 | 1.99E-01 | 1 |
| KCNQ3   | 163210  | 970  | -6  | 2195096 | 661804  | 0 | 10 | 0 | 0 | 29 | 24 | 11279148 | 1.99E-01 | 1 |
| UACA    | 247817  | 364  | 19  | 3764700 | 896052  | 0 | 15 | 1 | 0 | 19 | 17 | 7591344  | 1.99E-01 | 1 |
| LMCD1   | 92154   | 581  | 1   | 934856  | 259168  | 0 | 3  | 1 | 0 | 50 | 59 | 25910748 | 1.99E-01 | 1 |
| APOA5   | 419339  | 326  | 36  | 923820  | 269136  | 0 | 4  | 0 | 0 | 50 | 47 | 21154588 | 1.99E-01 | 1 |
| XYLB    | 301536  | 437  | 24  | 1411896 | 385548  | 0 | 6  | 1 | 0 | 50 | 63 | 23628076 | 2.00E-01 | 1 |
| FAM180A | 470926  | 386  | -1  | 434320  | 131720  | 0 | 3  | 0 | 0 | 50 | 45 | 16597432 | 2.00E-01 | 1 |
| COQ3    | 259457  | 638  | 13  | 948740  | 264508  | 0 | 4  | 1 | 0 | 46 | 68 | 25937448 | 2.00E-01 | 1 |
| PSPN    | 943949  | 407  | 31  | 368816  | 137416  | 0 | 1  | 0 | 0 | 50 | 47 | 18083732 | 2.00E-01 | 1 |
| ADCY8   | 45406   | 771  | -7  | 3152380 | 933788  | 0 | 19 | 5 | 0 | 37 | 42 | 16193372 | 2.00E-01 | 1 |

|          |         |     |     |         |         |   |    |   |   |    |     |          |          |   |
|----------|---------|-----|-----|---------|---------|---|----|---|---|----|-----|----------|----------|---|
| PRICKLE1 | 175176  | 650 | 6   | 2137780 | 561056  | 0 | 8  | 2 | 0 | 30 | 28  | 10420120 | 2.00E-01 | 1 |
| SAMM50   | 155890  | 393 | 24  | 1232116 | 333572  | 0 | 3  | 1 | 0 | 50 | 44  | 19080532 | 2.00E-01 | 1 |
| HSPB2    | 437513  | 221 | 22  | 443932  | 148808  | 0 | 3  | 0 | 0 | 50 | 49  | 18660452 | 2.00E-01 | 1 |
| CCL7     | 26189   | 889 | -12 | 263084  | 67996   | 0 | 2  | 0 | 0 | 50 | 80  | 29689332 | 2.00E-01 | 1 |
| TP63     | 140525  | 403 | 15  | 1907804 | 503740  | 0 | 12 | 4 | 0 | 6  | 11  | 3055904  | 2.00E-01 | 1 |
| CRYBA2   | 922162  | 386 | 35  | 514420  | 139196  | 0 | 2  | 0 | 0 | 50 | 52  | 18596728 | 2.00E-01 | 1 |
| VAMP8    | 1158965 | 170 | 43  | 261304  | 70844   | 0 | 2  | 0 | 0 | 50 | 53  | 19662948 | 2.00E-01 | 1 |
| CLN3     | NaN     | NaN | NaN | 1120332 | 350304  | 0 | 8  | 0 | 0 | 50 | 116 | 39995888 | 2.01E-01 | 1 |
| RASSF8   | 143649  | 396 | 4   | 1114280 | 294412  | 0 | 5  | 0 | 0 | 50 | 30  | 17014308 | 2.01E-01 | 1 |
| IGSF21   | 55390   | 692 | 31  | 1171596 | 366324  | 0 | 4  | 1 | 0 | 50 | 52  | 21275628 | 2.01E-01 | 1 |
| MEIS1    | 21299   | 641 | -10 | 1046284 | 257744  | 0 | 5  | 2 | 0 | 16 | 24  | 8268456  | 2.01E-01 | 1 |
| GTF2H3   | 871640  | 315 | 40  | 840516  | 205056  | 0 | 4  | 1 | 0 | 50 | 59  | 21342912 | 2.01E-01 | 1 |
| CEND1    | 1788356 | 193 | 48  | 360984  | 123888  | 0 | 3  | 0 | 0 | 50 | 64  | 19157072 | 2.01E-01 | 1 |
| ELP4     | 165949  | 879 | -7  | 1092208 | 310076  | 0 | 7  | 1 | 0 | 50 | 64  | 23671152 | 2.01E-01 | 1 |
| TMEM206  | 487387  | 298 | 17  | 915988  | 238520  | 0 | 7  | 1 | 0 | 50 | 61  | 19624144 | 2.01E-01 | 1 |
| SCN1A    | 98532   | 550 | -11 | 5186564 | 1362412 | 0 | 24 | 2 | 0 | 10 | 12  | 4749396  | 2.01E-01 | 1 |
| TLR7     | 208310  | NaN | 55  | 2650776 | 721968  | 0 | 9  | 1 | 0 | 46 | 39  | 17239656 | 2.02E-01 | 1 |
| PPP1R3C  | 276001  | 206 | 16  | 814172  | 208972  | 0 | 3  | 1 | 0 | 50 | 40  | 17426556 | 2.02E-01 | 1 |
| NUDT16   | 274681  | 843 | 20  | 781420  | 262016  | 0 | 4  | 1 | 0 | 50 | 69  | 25513808 | 2.02E-01 | 1 |
| RUVBL1   | 834133  | 419 | 46  | 1181920 | 325028  | 0 | 6  | 0 | 0 | 50 | 83  | 24660476 | 2.02E-01 | 1 |
| GPR39    | 46530   | 849 | 3   | 1119976 | 338912  | 0 | 4  | 0 | 0 | 36 | 37  | 16968028 | 2.02E-01 | 1 |
| TNMD     | 182582  | NaN | -2  | 841584  | 202920  | 0 | 3  | 1 | 0 | 50 | 64  | 18681100 | 2.02E-01 | 1 |
| HIST1H3I | 228884  | 634 | 40  | 331436  | 111784  | 0 | 4  | 1 | 0 | 23 | 29  | 6014264  | 2.02E-01 | 1 |
| ANP32E   | 1207965 | 197 | 39  | 725172  | 162336  | 0 | 4  | 0 | 0 | 50 | 67  | 20708520 | 2.02E-01 | 1 |
| ZNF491   | 739660  | 633 | -2  | 1133860 | 273764  | 0 | 5  | 0 | 0 | 25 | 19  | 8588500  | 2.02E-01 | 1 |
| CRTC1    | 1398467 | 222 | 29  | 1631904 | 515844  | 0 | 5  | 1 | 0 | 50 | 56  | 20215104 | 2.02E-01 | 1 |
| HARS     | 774470  | 356 | 31  | 1310792 | 376648  | 0 | 5  | 0 | 0 | 19 | 25  | 9696372  | 2.02E-01 | 1 |
| CASC4    | 973993  | 493 | 37  | 1150236 | 288360  | 0 | 5  | 0 | 0 | 50 | 57  | 24795044 | 2.02E-01 | 1 |
| C1orf168 | 39470   | 514 | -6  | 1936284 | 480600  | 0 | 6  | 0 | 0 | 12 | 5   | 4710236  | 2.02E-01 | 1 |
| PSG8     | 386041  | 417 | -19 | 1100396 | 309364  | 0 | 5  | 0 | 0 | 21 | 21  | 9097224  | 2.03E-01 | 1 |
| TAF9     | 445098  | 314 | 50  | 1140268 | 309008  | 0 | 5  | 0 | 0 | 50 | 60  | 21405568 | 2.03E-01 | 1 |
| GRK5     | 831479  | 338 | 30  | 1561416 | 396228  | 0 | 6  | 3 | 0 | 34 | 34  | 12058788 | 2.03E-01 | 1 |
| PABPN1   | 1171456 | 330 | 20  | 768248  | 241012  | 0 | 3  | 0 | 0 | 50 | 49  | 21656192 | 2.03E-01 | 1 |

|          |         |     |     |         |         |   |    |   |   |    |     |          |          |   |
|----------|---------|-----|-----|---------|---------|---|----|---|---|----|-----|----------|----------|---|
| ITSN2    | 380538  | 378 | 37  | 4505180 | 1154152 | 0 | 19 | 2 | 0 | 10 | 12  | 5090444  | 2.03E-01 | 1 |
| ZNF583   | 135115  | 713 | -50 | 1491284 | 352084  | 0 | 8  | 1 | 0 | 10 | 32  | 8144212  | 2.03E-01 | 1 |
| ITIH2    | 199302  | 528 | -8  | 2464588 | 655040  | 0 | 12 | 1 | 0 | 8  | 8   | 4807068  | 2.03E-01 | 1 |
| TUBGCP3  | 273358  | 399 | 11  | 2363128 | 635816  | 0 | 6  | 2 | 0 | 50 | 58  | 24560796 | 2.03E-01 | 1 |
| PDS5B    | 243309  | 471 | 50  | 3820236 | 964404  | 0 | 17 | 3 | 0 | 13 | 15  | 6774680  | 2.03E-01 | 1 |
| CELF1    | 1011926 | 219 | 40  | 1362412 | 347456  | 0 | 4  | 1 | 0 | 50 | 65  | 23817112 | 2.03E-01 | 1 |
| NDRG2    | 1005555 | 429 | 4   | 981136  | 274832  | 0 | 4  | 0 | 0 | 30 | 29  | 8819900  | 2.03E-01 | 1 |
| HRG      | 508316  | 436 | 45  | 1350664 | 362408  | 0 | 6  | 1 | 0 | 50 | 77  | 27976260 | 2.03E-01 | 1 |
| BRIP1    | 326357  | 412 | -9  | 3243160 | 843008  | 0 | 17 | 3 | 0 | 17 | 26  | 8152400  | 2.04E-01 | 1 |
| SYT16    | 215309  | 626 | -6  | 1647924 | 443220  | 0 | 6  | 2 | 0 | 7  | 8   | 5262392  | 2.04E-01 | 1 |
| RBP1     | 226923  | 848 | 13  | 566396  | 151300  | 0 | 3  | 0 | 0 | 50 | 54  | 17424776 | 2.04E-01 | 1 |
| MYO3A    | 63308   | 873 | -6  | 4247436 | 1074408 | 0 | 20 | 6 | 0 | 36 | 50  | 16311920 | 2.04E-01 | 1 |
| KRT33B   | 1321356 | 424 | -6  | 1031332 | 294056  | 0 | 8  | 0 | 0 | 18 | 19  | 6810636  | 2.04E-01 | 1 |
| MAGI3    | 369997  | 623 | 2   | 3840884 | 1048420 | 0 | 15 | 6 | 0 | 50 | 58  | 21445084 | 2.04E-01 | 1 |
| DTNBP1   | 118453  | 750 | 24  | 1015312 | 260948  | 0 | 5  | 1 | 0 | 50 | 141 | 46629592 | 2.05E-01 | 1 |
| DHRS7B   | 409501  | 382 | -18 | 818800  | 253472  | 0 | 3  | 0 | 0 | 37 | 39  | 16113984 | 2.05E-01 | 1 |
| AGTRAP   | 606580  | 187 | 36  | 566396  | 71200   | 0 | 2  | 0 | 0 | 50 | 60  | 23033912 | 2.05E-01 | 1 |
| RASL11B  | 170130  | 812 | 9   | 628696  | 181916  | 0 | 4  | 0 | 0 | 50 | 66  | 19346820 | 2.05E-01 | 1 |
| MPHOSPH1 | 170324  | 715 | -10 | 440372  | 94696   | 0 | 3  | 1 | 0 | 6  | 8   | 2889296  | 2.05E-01 | 1 |
| GSTA3    | 604568  | 455 | 8   | 590248  | 149876  | 0 | 2  | 0 | 0 | 50 | 57  | 21199088 | 2.05E-01 | 1 |
| IER5     | 201966  | 253 | 23  | 780352  | 270560  | 0 | 2  | 1 | 0 | 50 | 33  | 19168464 | 2.05E-01 | 1 |
| CSNK1G3  | 121115  | 474 | 23  | 1216096 | 296192  | 0 | 3  | 1 | 0 | 50 | 45  | 19783988 | 2.05E-01 | 1 |
| RNF217   | 120614  | 269 | -24 | 735140  | 175864  | 0 | 4  | 1 | 0 | 50 | 61  | 19568608 | 2.06E-01 | 1 |
| HDHD3    | 390186  | 297 | 36  | 603776  | 203632  | 0 | 4  | 0 | 0 | 50 | 42  | 19391676 | 2.06E-01 | 1 |
| PEX19    | 891852  | 358 | 25  | 790676  | 202564  | 0 | 5  | 0 | 0 | 50 | 67  | 19194452 | 2.06E-01 | 1 |
| MIF4GD   | 1723762 | 171 | 31  | 668212  | 180848  | 0 | 5  | 0 | 0 | 50 | 81  | 19557572 | 2.06E-01 | 1 |
| ASGR1    | 1682013 | 348 | 15  | 771452  | 198292  | 0 | 3  | 1 | 0 | 50 | 56  | 20137140 | 2.06E-01 | 1 |
| STK4     | 938230  | 294 | 42  | 1287652 | 320756  | 0 | 7  | 0 | 0 | 44 | 73  | 25500636 | 2.06E-01 | 1 |
| NDUFB2   | 329944  | 567 | 29  | 278036  | 76540   | 0 | 1  | 0 | 0 | 50 | 74  | 24895436 | 2.06E-01 | 1 |
| N6AMT2   | 403677  | 429 | 44  | 565684  | 140264  | 0 | 4  | 0 | 0 | 50 | 55  | 22681828 | 2.06E-01 | 1 |
| ZNF223   | 533136  | 558 | -35 | 1261664 | 302956  | 0 | 6  | 1 | 0 | 50 | 58  | 16442928 | 2.06E-01 | 1 |
| MRPS36   | 423022  | 261 | 47  | 275544  | 72624   | 0 | 2  | 0 | 0 | 50 | 52  | 19542976 | 2.06E-01 | 1 |
| BLNK     | 817052  | 804 | 34  | 1214672 | 317908  | 0 | 6  | 0 | 0 | 19 | 18  | 8348200  | 2.06E-01 | 1 |

|          |         |      |     |         |        |   |    |   |   |    |     |          |          |   |
|----------|---------|------|-----|---------|--------|---|----|---|---|----|-----|----------|----------|---|
| IFNK     | NaN     | NaN  | NaN | 547172  | 124600 | 0 | 4  | 1 | 0 | 50 | 117 | 39770184 | 2.06E-01 | 1 |
| MPHOSPH  | 306203  | 602  | 18  | 2251700 | 564616 | 0 | 12 | 1 | 0 | 29 | 28  | 15106148 | 2.06E-01 | 1 |
| INRNPCLE | NaN     | NaN  | NaN | 746176  | 200072 | 0 | 4  | 1 | 0 | 50 | 117 | 39845656 | 2.07E-01 | 1 |
| C1orf110 | 334195  | 540  | -7  | 781776  | 201852 | 0 | 5  | 1 | 0 | 50 | 40  | 16887572 | 2.07E-01 | 1 |
| MYF5     | 27810   | 974  | -1  | 644716  | 184052 | 0 | 8  | 3 | 0 | 3  | 8   | 1275904  | 2.07E-01 | 1 |
| ITGB8    | 207764  | 550  | 30  | 2011400 | 511216 | 0 | 9  | 3 | 0 | 46 | 49  | 19172024 | 2.07E-01 | 1 |
| UPRT     | 145779  | NaN  | -5  | 796728  | 222144 | 0 | 5  | 0 | 0 | 50 | 51  | 18929588 | 2.07E-01 | 1 |
| ELANE    | 2168802 | 198  | 28  | 657532  | 222500 | 0 | 5  | 1 | 0 | 50 | 73  | 22578944 | 2.07E-01 | 1 |
| ZC3H18   | 626708  | 184  | 39  | 2418308 | 710932 | 0 | 6  | 1 | 0 | 46 | 36  | 19748032 | 2.07E-01 | 1 |
| HOXC8    | 1185281 | 279  | 54  | 620864  | 161980 | 0 | 5  | 0 | 0 | 50 | 59  | 19280960 | 2.07E-01 | 1 |
| GNL3L    | 302365  | NaN  | 31  | 1530444 | 401568 | 0 | 6  | 0 | 0 | 50 | 56  | 24348264 | 2.08E-01 | 1 |
| NPRL2    | 843769  | 206  | 51  | 998936  | 264508 | 0 | 4  | 0 | 0 | 50 | 68  | 20472848 | 2.08E-01 | 1 |
| XAB2     | 611341  | 384  | 33  | 2208268 | 615524 | 0 | 6  | 1 | 0 | 16 | 13  | 8447524  | 2.08E-01 | 1 |
| CLDN1    | 164468  | 348  | 3   | 534000  | 158064 | 0 | 3  | 0 | 0 | 50 | 47  | 21290936 | 2.08E-01 | 1 |
| TP53I13  | 760947  | 353  | 26  | 953724  | 336420 | 0 | 3  | 0 | 0 | 50 | 54  | 24137156 | 2.08E-01 | 1 |
| CENPT    | 1039476 | 143  | 49  | 1404420 | 447492 | 0 | 8  | 1 | 0 | 50 | 49  | 20248924 | 2.08E-01 | 1 |
| SAMHD1   | 817783  | 225  | 47  | 1655756 | 421504 | 0 | 5  | 2 | 0 | 50 | 68  | 25624524 | 2.08E-01 | 1 |
| LCN2     | 1762678 | 201  | 44  | 526880  | 138484 | 0 | 3  | 1 | 0 | 50 | 65  | 19259600 | 2.08E-01 | 1 |
| AURKC    | 407201  | 924  | -63 | 801000  | 228552 | 0 | 5  | 1 | 0 | 50 | 58  | 18412320 | 2.08E-01 | 1 |
| C9orf156 | 468629  | 276  | 38  | 1114280 | 321112 | 0 | 8  | 0 | 0 | 50 | 57  | 19671848 | 2.08E-01 | 1 |
| ZNF330   | 71072   | 671  | -4  | 875048  | 191884 | 0 | 5  | 0 | 0 | 50 | 69  | 21972320 | 2.08E-01 | 1 |
| CRTP17-  | 1149433 | 468  | -14 | 268424  | 73336  | 0 | 1  | 0 | 0 | 50 | 53  | 16834528 | 2.09E-01 | 1 |
| SLC35F4  | 175308  | 918  | 27  | 1321828 | 380564 | 0 | 5  | 1 | 0 | 50 | 42  | 20255332 | 2.09E-01 | 1 |
| CD5L     | 116471  | 778  | 28  | 890000  | 246352 | 0 | 6  | 1 | 0 | 15 | 13  | 6004296  | 2.09E-01 | 1 |
| NPY1R    | 74427   | 1197 | -18 | 975440  | 262372 | 0 | 6  | 1 | 0 | 50 | 78  | 21835260 | 2.09E-01 | 1 |
| TRIML1   | 32696   | 595  | -20 | 1201500 | 322536 | 0 | 5  | 1 | 0 | 50 | 51  | 18116128 | 2.09E-01 | 1 |
| ZNF10    | 334913  | 834  | 6   | 1489504 | 366680 | 0 | 7  | 2 | 0 | 50 | 71  | 19917132 | 2.09E-01 | 1 |
| FRAPPC6E | 314417  | 166  | 13  | 429336  | 101460 | 0 | 1  | 0 | 0 | 50 | 41  | 19241800 | 2.09E-01 | 1 |
| TAAR5    | 125852  | 605  | 19  | 833040  | 254184 | 0 | 4  | 1 | 0 | 50 | 67  | 19971956 | 2.09E-01 | 1 |
| S100A6   | 1454773 | 186  | 26  | 239944  | 62300  | 0 | 2  | 0 | 0 | 50 | 56  | 19376724 | 2.10E-01 | 1 |
| BCAT1    | 252342  | 905  | 2   | 1048776 | 288360 | 0 | 4  | 0 | 0 | 50 | 82  | 25417332 | 2.10E-01 | 1 |
| RCOR3    | 279632  | 545  | -1  | 1534360 | 320756 | 0 | 5  | 1 | 0 | 50 | 49  | 18467500 | 2.10E-01 | 1 |
| CA1      | 99296   | 1463 | 15  | 689928  | 181560 | 0 | 3  | 1 | 0 | 50 | 52  | 18027128 | 2.10E-01 | 1 |



|          |         |      |     |         |         |   |    |   |   |    |     |          |          |   |
|----------|---------|------|-----|---------|---------|---|----|---|---|----|-----|----------|----------|---|
| ZNF846   | 938482  | 600  | -49 | 1386976 | 345320  | 0 | 9  | 2 | 0 | 50 | 135 | 30618136 | 2.10E-01 | 1 |
| PAIP2B   | 349503  | 464  | 30  | 339980  | 70132   | 0 | 2  | 0 | 0 | 50 | 41  | 20361420 | 2.10E-01 | 1 |
| TRIM71   | 507311  | 469  | 24  | 2113928 | 685300  | 0 | 8  | 4 | 0 | 30 | 24  | 11402680 | 2.10E-01 | 1 |
| CLC      | 1286220 | 526  | 26  | 377004  | 96120   | 0 | 2  | 0 | 0 | 50 | 75  | 22079120 | 2.10E-01 | 1 |
| MPDU1    | 1957426 | 194  | 24  | 624068  | 196156  | 0 | 2  | 1 | 0 | 50 | 81  | 21975524 | 2.10E-01 | 1 |
| FOXD4L5  | NaN     | NaN  | NaN | 1001072 | 334996  | 0 | 5  | 1 | 0 | 50 | 117 | 39980580 | 2.10E-01 | 1 |
| TRIML2   | 32696   | 595  | -20 | 1010328 | 262728  | 0 | 5  | 1 | 0 | 50 | 51  | 18116128 | 2.10E-01 | 1 |
| INO80    | 950881  | 181  | 41  | 4055552 | 1082596 | 0 | 18 | 4 | 0 | 14 | 15  | 5665028  | 2.10E-01 | 1 |
| CD300E   | 876565  | 484  | 14  | 521540  | 155572  | 0 | 2  | 0 | 0 | 50 | 52  | 17749092 | 2.10E-01 | 1 |
| NAGK     | 367824  | 470  | 34  | 1001784 | 289428  | 0 | 4  | 0 | 0 | 50 | 37  | 18057032 | 2.10E-01 | 1 |
| TPK1     | 123029  | 998  | -17 | 651480  | 164472  | 0 | 3  | 0 | 0 | 50 | 65  | 22342204 | 2.11E-01 | 1 |
| USP4     | 1661046 | 201  | 34  | 2520124 | 660380  | 0 | 10 | 2 | 0 | 27 | 36  | 12583176 | 2.11E-01 | 1 |
| KCNJ3    | 15788   | 1135 | 7   | 1258816 | 358136  | 0 | 4  | 2 | 0 | 28 | 30  | 12813152 | 2.11E-01 | 1 |
| LCE2D    | 169158  | 818  | 24  | 280884  | 79032   | 0 | 2  | 0 | 0 | 50 | 53  | 20184132 | 2.11E-01 | 1 |
| ODAM     | 181352  | 975  | 12  | 742616  | 199360  | 0 | 4  | 0 | 0 | 50 | 57  | 17976932 | 2.11E-01 | 1 |
| FLRT2    | 18925   | 671  | -45 | 1625852 | 491992  | 0 | 12 | 4 | 0 | 7  | 22  | 4594180  | 2.11E-01 | 1 |
| PPCS     | 570562  | 583  | 27  | 762196  | 248132  | 0 | 7  | 2 | 0 | 2  | 3   | 1269496  | 2.11E-01 | 1 |
| SLC48A1  | 395089  | 320  | 14  | 367748  | 111784  | 0 | 1  | 0 | 0 | 50 | 52  | 22689304 | 2.12E-01 | 1 |
| IL1RAPL1 | 11003   | NaN  | 14  | 1809548 | 468496  | 0 | 10 | 2 | 0 | 50 | 69  | 23568268 | 2.12E-01 | 1 |
| MRPS35   | 348119  | 376  | 4   | 843008  | 227128  | 0 | 4  | 0 | 0 | 50 | 55  | 19941340 | 2.12E-01 | 1 |
| SPATA19  | 270077  | 622  | -14 | 448916  | 117124  | 0 | 3  | 0 | 0 | 50 | 42  | 17328656 | 2.12E-01 | 1 |
| MDH1     | 328344  | 468  | 7   | 865792  | 243860  | 0 | 4  | 1 | 0 | 50 | 47  | 17987612 | 2.12E-01 | 1 |
| PTPN13   | 239175  | 533  | 31  | 6454636 | 1727312 | 0 | 19 | 5 | 0 | 50 | 73  | 22785424 | 2.12E-01 | 1 |
| PARK2    | 8197    | 1243 | -30 | 1224284 | 315772  | 0 | 5  | 0 | 0 | 38 | 85  | 18210824 | 2.12E-01 | 1 |
| SETD7    | 400132  | 191  | 15  | 954436  | 251336  | 0 | 4  | 0 | 0 | 50 | 48  | 20227208 | 2.13E-01 | 1 |
| KCNJ6    | 253563  | 541  | 36  | 1074052 | 297260  | 0 | 7  | 1 | 0 | 50 | 41  | 17181272 | 2.13E-01 | 1 |
| KCNE3    | 633655  | 283  | 23  | 258812  | 78676   | 0 | 2  | 0 | 0 | 50 | 65  | 23451500 | 2.13E-01 | 1 |
| PTGFR    | 249935  | 671  | -16 | 976864  | 265220  | 0 | 5  | 2 | 0 | 50 | 81  | 22653704 | 2.13E-01 | 1 |
| FAM120B  | 366503  | 600  | -4  | 2334648 | 626916  | 0 | 8  | 0 | 0 | 9  | 9   | 4145976  | 2.13E-01 | 1 |
| TNFSF10  | 319022  | 263  | 23  | 743684  | 179068  | 0 | 4  | 0 | 0 | 50 | 57  | 25565072 | 2.13E-01 | 1 |
| INPP4B   | 51592   | 807  | 10  | 2437888 | 619796  | 0 | 8  | 2 | 0 | 39 | 50  | 18969460 | 2.13E-01 | 1 |
| SAMD3    | 84835   | 891  | 27  | 1391604 | 337488  | 0 | 5  | 0 | 0 | 50 | 42  | 21684316 | 2.13E-01 | 1 |
| TMX1     | 338961  | 610  | 38  | 739768  | 190460  | 0 | 2  | 0 | 0 | 50 | 50  | 17363188 | 2.13E-01 | 1 |

|         |         |      |     |         |         |   |    |   |   |    |     |          |          |   |
|---------|---------|------|-----|---------|---------|---|----|---|---|----|-----|----------|----------|---|
| THAP10  | 250598  | 339  | 10  | 637952  | 197224  | 0 | 3  | 0 | 0 | 50 | 54  | 19786124 | 2.13E-01 | 1 |
| ARVCF   | 616246  | 217  | 37  | 2373452 | 788896  | 0 | 10 | 4 | 0 | 45 | 43  | 18624496 | 2.14E-01 | 1 |
| CD28    | 320806  | 477  | 19  | 565684  | 155216  | 0 | 3  | 1 | 0 | 29 | 27  | 13344660 | 2.14E-01 | 1 |
| MAGEB10 | 10745   | NaN  | 16  | 870776  | 248488  | 0 | 5  | 1 | 0 | 50 | 64  | 18168460 | 2.14E-01 | 1 |
| CTDSP1  | 734742  | 197  | 37  | 667856  | 197224  | 0 | 3  | 0 | 0 | 50 | 56  | 21809272 | 2.14E-01 | 1 |
| ZNF714  | 164756  | 1079 | -42 | 1441800 | 349236  | 0 | 9  | 1 | 0 | 26 | 42  | 10608088 | 2.14E-01 | 1 |
| RHGAP11 | 244857  | 383  | 1   | 2641520 | 710932  | 0 | 9  | 1 | 0 | 23 | 25  | 11827744 | 2.14E-01 | 1 |
| EVI2A   | NaN     | NaN  | NaN | 656464  | 185120  | 0 | 3  | 0 | 0 | 50 | 116 | 39830704 | 2.14E-01 | 1 |
| HRSP12  | 635159  | 368  | 44  | 363476  | 102172  | 0 | 2  | 0 | 0 | 50 | 46  | 22628072 | 2.14E-01 | 1 |
| CDK12   | 1409087 | 239  | 28  | 3727320 | 1105380 | 0 | 20 | 3 | 0 | 25 | 31  | 10126420 | 2.15E-01 | 1 |
| POLR3H  | 1467336 | 183  | 66  | 540052  | 142400  | 0 | 2  | 0 | 0 | 50 | 56  | 20734864 | 2.15E-01 | 1 |
| PXT1    | 968861  | 146  | 41  | 363120  | 82236   | 0 | 1  | 0 | 0 | 50 | 69  | 26742008 | 2.15E-01 | 1 |
| FNBP4   | 979103  | 158  | 19  | 2590256 | 739768  | 0 | 11 | 0 | 0 | 7  | 3   | 3375592  | 2.15E-01 | 1 |
| SHH     | 213448  | 634  | 23  | 1114280 | 379852  | 0 | 5  | 0 | 0 | 41 | 41  | 17509148 | 2.15E-01 | 1 |
| TCF23   | 1214097 | 238  | 50  | 525812  | 175864  | 0 | 2  | 1 | 0 | 50 | 60  | 22743060 | 2.15E-01 | 1 |
| YTHDF2  | 818065  | 208  | 30  | 1469212 | 410468  | 0 | 9  | 2 | 0 | 50 | 75  | 21917852 | 2.15E-01 | 1 |
| ARL16   | 3745109 | 205  | 30  | 494840  | 158776  | 0 | 3  | 1 | 0 | 33 | 25  | 10695308 | 2.16E-01 | 1 |
| ZNF37A  | 138629  | 916  | -18 | 1468856 | 348880  | 0 | 8  | 0 | 0 | 12 | 19  | 5440036  | 2.16E-01 | 1 |
| PQLC3   | 491115  | 255  | 25  | 521184  | 154860  | 0 | 4  | 0 | 0 | 50 | 57  | 18627344 | 2.16E-01 | 1 |
| MRPS21  | 1213150 | 197  | 38  | 233180  | 57316   | 0 | 1  | 1 | 0 | 9  | 3   | 1880748  | 2.16E-01 | 1 |
| HACL1   | 433102  | 235  | 32  | 1518696 | 404772  | 0 | 10 | 3 | 0 | 28 | 25  | 9571772  | 2.16E-01 | 1 |
| KRT84   | 936407  | 213  | 42  | 1506948 | 454968  | 0 | 6  | 2 | 0 | 50 | 55  | 23702836 | 2.16E-01 | 1 |
| STIL    | 321135  | 366  | 6   | 3315784 | 882524  | 0 | 15 | 2 | 0 | 50 | 46  | 17856248 | 2.16E-01 | 1 |
| UBE2E3  | 114904  | 888  | 11  | 543612  | 144180  | 0 | 2  | 0 | 0 | 50 | 60  | 20862668 | 2.17E-01 | 1 |
| DHRS9   | 303546  | 646  | 12  | 809188  | 233180  | 0 | 4  | 1 | 0 | 50 | 70  | 25775468 | 2.17E-01 | 1 |
| WEE1    | 553054  | 158  | 28  | 1644720 | 470988  | 0 | 7  | 1 | 0 | 50 | 64  | 22006140 | 2.17E-01 | 1 |
| COL5A2  | 237205  | 422  | 1   | 3796384 | 1236032 | 0 | 16 | 3 | 0 | 50 | 49  | 22283108 | 2.17E-01 | 1 |
| SPANXN3 | 4577    | NaN  | -29 | 373088  | 90424   | 0 | 4  | 1 | 0 | 11 | 39  | 6381300  | 2.17E-01 | 1 |
| RTAP24  | 6302    | 1011 | -69 | 640444  | 178712  | 0 | 4  | 2 | 0 | 41 | 58  | 10000752 | 2.18E-01 | 1 |
| DCAF8   | 866729  | 355  | 27  | 1551092 | 416164  | 0 | 5  | 0 | 0 | 50 | 59  | 21739140 | 2.18E-01 | 1 |
| FGA     | 59962   | 1036 | -4  | 2222152 | 624068  | 0 | 13 | 1 | 0 | 30 | 28  | 11140308 | 2.18E-01 | 1 |
| MCCC1   | 275779  | 546  | 22  | 1896412 | 506588  | 0 | 11 | 3 | 0 | 22 | 18  | 8817052  | 2.18E-01 | 1 |
| PGAP2   | 425863  | 258  | 23  | 1063016 | 166252  | 0 | 3  | 0 | 0 | 50 | 55  | 19846644 | 2.18E-01 | 1 |

|          |         |     |     |         |        |   |    |   |   |    |     |          |          |   |
|----------|---------|-----|-----|---------|--------|---|----|---|---|----|-----|----------|----------|---|
| KCTD6    | 567081  | 265 | 35  | 605200  | 165896 | 0 | 2  | 0 | 0 | 50 | 52  | 21882608 | 2.18E-01 | 1 |
| GREM1    | 244472  | 383 | 5   | 459952  | 135992 | 0 | 2  | 0 | 0 | 50 | 44  | 17500960 | 2.18E-01 | 1 |
| HSD17B11 | 502611  | 417 | 16  | 767536  | 222500 | 0 | 3  | 0 | 0 | 50 | 48  | 17617728 | 2.19E-01 | 1 |
| SOX10    | 1370748 | 203 | 50  | 1153796 | 355288 | 0 | 2  | 0 | 0 | 46 | 33  | 17324384 | 2.19E-01 | 1 |
| TRIM21   | 264090  | 862 | -7  | 1218944 | 331792 | 0 | 7  | 0 | 0 | 22 | 33  | 12089760 | 2.19E-01 | 1 |
| CIRBP    | 2214581 | 234 | 29  | 454968  | 124956 | 0 | 2  | 0 | 0 | 50 | 68  | 20485664 | 2.19E-01 | 1 |
| MCM4     | 898350  | 459 | 35  | 2212184 | 624424 | 0 | 9  | 1 | 0 | 46 | 43  | 18109008 | 2.19E-01 | 1 |
| C3orf14  | 213716  | 935 | -3  | 343896  | 86508  | 0 | 3  | 0 | 0 | 50 | 69  | 21505960 | 2.19E-01 | 1 |
| CCND1    | 441431  | 536 | 41  | 752940  | 212532 | 0 | 5  | 2 | 0 | 50 | 63  | 20424076 | 2.19E-01 | 1 |
| PFN1     | 1416161 | 231 | 30  | 354576  | 105732 | 0 | 3  | 0 | 0 | 50 | 65  | 18681100 | 2.19E-01 | 1 |
| TDGF1    | 277267  | 528 | 52  | 498400  | 134924 | 0 | 5  | 1 | 0 | 11 | 14  | 3646864  | 2.19E-01 | 1 |
| HDGFRP3  | 299178  | 679 | 24  | 541832  | 133144 | 0 | 1  | 0 | 0 | 50 | 43  | 23314796 | 2.20E-01 | 1 |
| HORMAD1  | 1611525 | 178 | 42  | 1072984 | 252404 | 0 | 6  | 1 | 0 | 50 | 66  | 20744120 | 2.20E-01 | 1 |
| SSPN     | 157088  | 383 | 25  | 605556  | 186900 | 0 | 2  | 0 | 0 | 50 | 50  | 20347180 | 2.20E-01 | 1 |
| CNKSR2   | 90158   | NaN | -2  | 2712364 | 700964 | 0 | 10 | 1 | 0 | 20 | 26  | 12236076 | 2.20E-01 | 1 |
| CCDC87   | 1343990 | 194 | 62  | 2077972 | 647564 | 0 | 8  | 4 | 0 | 21 | 20  | 8972268  | 2.20E-01 | 1 |
| H6PD     | 954202  | 297 | 33  | 1957644 | 597012 | 0 | 10 | 2 | 0 | 50 | 78  | 21810696 | 2.20E-01 | 1 |
| ELOVL1   | 1088321 | 252 | 27  | 734428  | 192596 | 0 | 3  | 0 | 0 | 50 | 56  | 22185208 | 2.20E-01 | 1 |
| NPB      | 3798594 | 211 | 19  | 295836  | 114276 | 0 | 2  | 0 | 0 | 34 | 28  | 11428668 | 2.20E-01 | 1 |
| SPANXD   | NaN     | NaN | NaN | 258812  | 65860  | 0 | 2  | 0 | 0 | 50 | 116 | 39711444 | 2.20E-01 | 1 |
| ZBPB2    | 1602321 | 292 | 18  | 896408  | 219652 | 0 | 6  | 2 | 0 | 33 | 61  | 15816724 | 2.20E-01 | 1 |
| TPRKB    | 978005  | 466 | 31  | 458528  | 122464 | 0 | 2  | 0 | 0 | 50 | 67  | 22206212 | 2.21E-01 | 1 |
| TCN1     | 337128  | 548 | 8   | 1132792 | 294056 | 0 | 5  | 1 | 0 | 50 | 56  | 21099408 | 2.21E-01 | 1 |
| RNF181   | 1158965 | 170 | 43  | 410824  | 101816 | 0 | 2  | 1 | 0 | 27 | 36  | 10060204 | 2.21E-01 | 1 |
| TCF12    | 203021  | 599 | 27  | 1913500 | 519404 | 0 | 7  | 0 | 0 | 25 | 22  | 11918880 | 2.21E-01 | 1 |
| HIST1H2A | 267617  | 634 | 32  | 313636  | 110360 | 0 | 3  | 0 | 0 | 50 | 56  | 15505936 | 2.21E-01 | 1 |
| HAO2     | 409405  | 720 | 3   | 897832  | 259880 | 0 | 7  | 1 | 0 | 50 | 56  | 19659032 | 2.21E-01 | 1 |
| RCHY1    | 461415  | 491 | 19  | 728020  | 145604 | 0 | 2  | 0 | 0 | 50 | 63  | 20447928 | 2.21E-01 | 1 |
| F13B     | 220645  | 802 | -30 | 1744044 | 426132 | 0 | 8  | 2 | 0 | 24 | 43  | 11316528 | 2.21E-01 | 1 |
| TMED1    | 2054203 | 208 | 30  | 570668  | 172660 | 0 | 3  | 0 | 0 | 50 | 73  | 19425852 | 2.21E-01 | 1 |
| NUP107   | 486884  | 294 | 31  | 2462452 | 619796 | 0 | 8  | 0 | 0 | 5  | 0   | 1368108  | 2.21E-01 | 1 |
| SLC25A24 | 226531  | 454 | -15 | 1349596 | 357068 | 0 | 3  | 3 | 0 | 43 | 37  | 13814936 | 2.21E-01 | 1 |
| NGFRAP1  | 448080  | NaN | 32  | 292988  | 70132  | 0 | 1  | 0 | 0 | 50 | 52  | 16837020 | 2.22E-01 | 1 |

|          |         |     |     |         |         |   |    |   |   |    |     |          |          |   |
|----------|---------|-----|-----|---------|---------|---|----|---|---|----|-----|----------|----------|---|
| LST1     | 2517285 | 220 | 35  | 294768  | 58740   | 0 | 2  | 0 | 0 | 50 | 55  | 21824936 | 2.22E-01 | 1 |
| GUK1     | 702358  | 341 | 15  | 564972  | 168744  | 0 | 2  | 0 | 0 | 50 | 43  | 17240012 | 2.22E-01 | 1 |
| PCSK5    | 96278   | 886 | -24 | 2410832 | 605200  | 0 | 11 | 3 | 0 | 37 | 45  | 14190516 | 2.22E-01 | 1 |
| TSKU     | 287129  | 214 | 42  | 830904  | 307584  | 0 | 4  | 2 | 0 | 50 | 56  | 18200144 | 2.22E-01 | 1 |
| ADAM21   | 423685  | 706 | 22  | 1823432 | 493060  | 0 | 7  | 1 | 0 | 37 | 41  | 19971244 | 2.22E-01 | 1 |
| ANKZF1   | 733837  | 158 | 40  | 1821652 | 563192  | 0 | 8  | 0 | 0 | 15 | 12  | 5688168  | 2.23E-01 | 1 |
| MED9     | 915530  | 220 | -3  | 372732  | 104664  | 0 | 2  | 0 | 0 | 50 | 67  | 16916408 | 2.23E-01 | 1 |
| ECHDC3   | 371900  | 163 | 15  | 753652  | 237452  | 0 | 4  | 0 | 0 | 50 | 43  | 21952740 | 2.23E-01 | 1 |
| ZDHHC7   | 481076  | 273 | 28  | 889644  | 248844  | 0 | 3  | 1 | 0 | 50 | 52  | 20133936 | 2.23E-01 | 1 |
| SH2D5    | 634204  | 208 | 34  | 1055540 | 341404  | 0 | 4  | 1 | 0 | 50 | 59  | 20255332 | 2.23E-01 | 1 |
| RSC1A1   | 677127  | 162 | 28  | 1537920 | 445356  | 0 | 7  | 0 | 0 | 9  | 10  | 4870792  | 2.23E-01 | 1 |
| HDDC3    | NaN     | NaN | NaN | 357780  | 108936  | 0 | 1  | 0 | 0 | 50 | 116 | 39754520 | 2.23E-01 | 1 |
| FAM3D    | 497368  | 503 | 38  | 609472  | 149876  | 0 | 3  | 1 | 0 | 50 | 77  | 24522348 | 2.23E-01 | 1 |
| TFB1M    | 116637  | 428 | 26  | 891780  | 247776  | 0 | 4  | 0 | 0 | 50 | 38  | 20981572 | 2.23E-01 | 1 |
| TUSC5    | 1447271 | 228 | 21  | 437168  | 141688  | 0 | 3  | 1 | 0 | 30 | 48  | 12364592 | 2.24E-01 | 1 |
| AHSG     | 508316  | 436 | 45  | 920972  | 285868  | 0 | 6  | 1 | 0 | 50 | 77  | 27976260 | 2.24E-01 | 1 |
| MYL2     | 907625  | 570 | 47  | 457104  | 105732  | 0 | 2  | 1 | 0 | 24 | 35  | 12869400 | 2.24E-01 | 1 |
| ZFYVE28  | 845507  | 271 | 40  | 2399440 | 727664  | 0 | 6  | 2 | 0 | 50 | 76  | 28542300 | 2.24E-01 | 1 |
| NUBP2    | 1604603 | 288 | 36  | 684944  | 214312  | 0 | 2  | 0 | 0 | 50 | 49  | 20717064 | 2.24E-01 | 1 |
| NXNL2    | 130577  | 438 | 1   | 475616  | 150232  | 0 | 2  | 0 | 0 | 50 | 55  | 19031048 | 2.24E-01 | 1 |
| CTTNBP2  | 96915   | 674 | -11 | 4228568 | 1199008 | 0 | 15 | 2 | 0 | 46 | 63  | 26790780 | 2.25E-01 | 1 |
| MYF6     | 27810   | 974 | -1  | 610184  | 179068  | 0 | 5  | 1 | 0 | 40 | 75  | 17126092 | 2.25E-01 | 1 |
| DAZL     | 140687  | 470 | 24  | 783912  | 207192  | 0 | 4  | 0 | 0 | 50 | 43  | 19332224 | 2.25E-01 | 1 |
| UBE2A    | 663615  | NaN | 48  | 408688  | 102884  | 0 | 2  | 0 | 0 | 50 | 60  | 18555788 | 2.25E-01 | 1 |
| OR2B2    | 228884  | 634 | 40  | 892848  | 258456  | 0 | 5  | 1 | 0 | 50 | 48  | 14804260 | 2.25E-01 | 1 |
| LCE2B    | 169158  | 818 | 24  | 279460  | 80456   | 0 | 2  | 0 | 0 | 50 | 53  | 20184132 | 2.25E-01 | 1 |
| SOX5     | 29515   | 973 | -7  | 1986124 | 534356  | 0 | 17 | 5 | 0 | 10 | 15  | 3859752  | 2.25E-01 | 1 |
| LACTB    | 451944  | 230 | 36  | 1389112 | 392312  | 0 | 4  | 0 | 0 | 50 | 52  | 20650492 | 2.26E-01 | 1 |
| SLC30A1  | 380154  | 236 | 22  | 1249560 | 382344  | 0 | 3  | 0 | 0 | 18 | 9   | 7749052  | 2.26E-01 | 1 |
| FAM57A   | 662733  | 483 | 10  | 645428  | 200428  | 0 | 2  | 0 | 0 | 28 | 22  | 9770420  | 2.26E-01 | 1 |
| HIST1H2A | 267617  | 634 | 32  | 306160  | 109292  | 0 | 5  | 2 | 0 | 12 | 20  | 2202928  | 2.26E-01 | 1 |
| CSPG5    | 888051  | 200 | 35  | 1329304 | 417944  | 0 | 7  | 1 | 0 | 50 | 63  | 22998312 | 2.26E-01 | 1 |
| NPFF     | 1469374 | 191 | 55  | 290852  | 85084   | 0 | 2  | 0 | 0 | 50 | 47  | 18664012 | 2.26E-01 | 1 |

|          |         |      |     |         |         |   |    |   |   |    |    |          |          |   |
|----------|---------|------|-----|---------|---------|---|----|---|---|----|----|----------|----------|---|
| EIF3A    | 701340  | 194  | 9   | 3584564 | 936280  | 0 | 14 | 1 | 0 | 13 | 14 | 7547556  | 2.26E-01 | 1 |
| LGALS13  | 1148741 | 322  | 25  | 368460  | 95052   | 0 | 3  | 1 | 0 | 16 | 12 | 4700624  | 2.26E-01 | 1 |
| SLK      | 508085  | 271  | 37  | 3258824 | 780352  | 0 | 10 | 0 | 0 | 6  | 6  | 4493432  | 2.26E-01 | 1 |
| PRR23B   | 336415  | 520  | 11  | 624068  | 228196  | 0 | 4  | 1 | 0 | 50 | 46 | 19800720 | 2.27E-01 | 1 |
| C11orf85 | 3151458 | 209  | 52  | 590248  | 142400  | 0 | 3  | 1 | 0 | 50 | 83 | 23753744 | 2.27E-01 | 1 |
| OR11A1   | 329776  | 872  | 7   | 763620  | 250980  | 0 | 4  | 1 | 0 | 50 | 77 | 21945976 | 2.27E-01 | 1 |
| MED28    | 271066  | 989  | 32  | 458528  | 129940  | 0 | 3  | 0 | 0 | 50 | 47 | 19786836 | 2.27E-01 | 1 |
| KCNA2    | 479017  | 640  | 21  | 1248492 | 353508  | 0 | 7  | 1 | 0 | 50 | 64 | 18776508 | 2.27E-01 | 1 |
| HTATSF1  | 374989  | NaN  | 23  | 1993244 | 467428  | 0 | 9  | 0 | 0 | 10 | 12 | 4821308  | 2.27E-01 | 1 |
| CR2      | 447441  | 354  | 30  | 2810976 | 772164  | 0 | 14 | 2 | 0 | 50 | 53 | 20601364 | 2.28E-01 | 1 |
| LEO1     | 575343  | 136  | 34  | 1773592 | 412604  | 0 | 10 | 1 | 0 | 50 | 44 | 18330440 | 2.28E-01 | 1 |
| TLL2     | 798938  | 623  | 33  | 2653268 | 687436  | 0 | 10 | 3 | 0 | 50 | 52 | 19747320 | 2.28E-01 | 1 |
| RSPH1    | 411865  | 374  | 67  | 824852  | 202564  | 0 | 4  | 1 | 0 | 50 | 55 | 18865864 | 2.28E-01 | 1 |
| HNRNPD   | 651473  | 390  | 26  | 936636  | 238164  | 0 | 3  | 1 | 0 | 24 | 33 | 11107912 | 2.28E-01 | 1 |
| PYCR1    | 3798594 | 211  | 19  | 863300  | 279460  | 0 | 3  | 1 | 0 | 34 | 28 | 11428668 | 2.28E-01 | 1 |
| SPOCK3   | 7931    | 1043 | -11 | 1176936 | 268068  | 0 | 5  | 0 | 0 | 50 | 80 | 23523768 | 2.28E-01 | 1 |
| MED21    | 408250  | 320  | 26  | 375936  | 103596  | 0 | 1  | 0 | 0 | 50 | 53 | 21014324 | 2.28E-01 | 1 |
| ACBD5    | 383472  | 555  | 36  | 1396588 | 339980  | 0 | 4  | 1 | 0 | 50 | 40 | 18981920 | 2.28E-01 | 1 |
| TGIF2    | 1019481 | 176  | 62  | 578500  | 192596  | 0 | 2  | 0 | 0 | 50 | 44 | 18338984 | 2.28E-01 | 1 |
| PRRG4    | 392152  | 375  | 10  | 583840  | 164828  | 0 | 3  | 0 | 0 | 50 | 60 | 27611360 | 2.28E-01 | 1 |
| CCDC36   | 1812695 | 203  | 45  | 1540768 | 395516  | 0 | 9  | 3 | 0 | 10 | 9  | 3276980  | 2.28E-01 | 1 |
| SFXN2    | 878626  | 180  | 27  | 852976  | 228908  | 0 | 4  | 1 | 0 | 50 | 59 | 20336144 | 2.29E-01 | 1 |
| ATMIN    | 231500  | 284  | 4   | 2047712 | 607336  | 0 | 9  | 1 | 0 | 50 | 47 | 21594604 | 2.29E-01 | 1 |
| PCP2     | 611341  | 384  | 33  | 354932  | 100036  | 0 | 1  | 0 | 0 | 50 | 46 | 20710656 | 2.29E-01 | 1 |
| CHSY1    | 409968  | 290  | 26  | 2012468 | 568888  | 0 | 8  | 2 | 0 | 23 | 29 | 10393776 | 2.29E-01 | 1 |
| HBD      | 109545  | 1056 | -1  | 371664  | 111072  | 0 | 1  | 0 | 0 | 50 | 50 | 17996156 | 2.29E-01 | 1 |
| NPSR1    | 106021  | 949  | 0   | 1055896 | 288716  | 0 | 4  | 0 | 0 | 23 | 26 | 11325428 | 2.29E-01 | 1 |
| DPYSL4   | 147055  | 416  | -6  | 1467788 | 423640  | 0 | 4  | 1 | 0 | 50 | 47 | 21665804 | 2.29E-01 | 1 |
| YTHDC1   | 126481  | 485  | 0   | 1917772 | 483092  | 0 | 6  | 0 | 0 | 5  | 1  | 2249564  | 2.29E-01 | 1 |
| GNAI1    | 94843   | 475  | -34 | 936992  | 230332  | 0 | 5  | 1 | 0 | 21 | 32 | 7716656  | 2.30E-01 | 1 |
| FANCD2   | 885389  | 170  | 41  | 3957652 | 1026704 | 0 | 18 | 3 | 0 | 49 | 52 | 22072000 | 2.30E-01 | 1 |
| CYTH4    | 902502  | 201  | 61  | 1056252 | 260592  | 0 | 4  | 0 | 0 | 5  | 3  | 2555012  | 2.30E-01 | 1 |
| SCGB1D2  | 3058870 | 450  | 42  | 237452  | 64792   | 0 | 2  | 0 | 0 | 50 | 51 | 16305156 | 2.30E-01 | 1 |

|           |         |     |     |         |         |   |    |   |   |    |    |          |          |   |
|-----------|---------|-----|-----|---------|---------|---|----|---|---|----|----|----------|----------|---|
| COMMD9    | 222571  | 248 | -8  | 510148  | 150944  | 0 | 3  | 1 | 0 | 50 | 50 | 22389196 | 2.30E-01 | 1 |
| CCBL1     | 1706086 | 201 | 24  | 1114280 | 292276  | 0 | 4  | 0 | 0 | 50 | 89 | 24955244 | 2.30E-01 | 1 |
| AQP10     | 1653296 | 236 | 29  | 740124  | 250980  | 0 | 3  | 0 | 0 | 50 | 69 | 22962712 | 2.30E-01 | 1 |
| ZNF133    | 575071  | 471 | -1  | 1657536 | 454968  | 0 | 6  | 0 | 0 | 9  | 9  | 3711656  | 2.30E-01 | 1 |
| TMCO4     | 668417  | 220 | 29  | 1594880 | 495196  | 0 | 9  | 1 | 0 | 25 | 31 | 10119300 | 2.30E-01 | 1 |
| D4S234E   | 143657  | 525 | 46  | 478820  | 134212  | 0 | 2  | 0 | 0 | 50 | 81 | 25934244 | 2.31E-01 | 1 |
| SLC25A13  | 149460  | 802 | 2   | 1744400 | 497332  | 0 | 6  | 0 | 0 | 12 | 10 | 5308672  | 2.31E-01 | 1 |
| RABGGTE   | 152545  | 578 | -9  | 875760  | 224280  | 0 | 4  | 1 | 0 | 50 | 66 | 20684312 | 2.31E-01 | 1 |
| PTPN4     | 346126  | 446 | 25  | 2458536 | 622644  | 0 | 13 | 1 | 0 | 14 | 21 | 8307616  | 2.31E-01 | 1 |
| RSPH4A    | 247712  | 479 | 10  | 1863304 | 455324  | 0 | 6  | 1 | 0 | 50 | 50 | 20262808 | 2.31E-01 | 1 |
| MFI2      | 719859  | 308 | 37  | 2046288 | 600216  | 0 | 6  | 1 | 0 | 12 | 12 | 8851228  | 2.31E-01 | 1 |
| TFF3      | 313101  | 464 | 90  | 243504  | 69420   | 0 | 2  | 0 | 0 | 50 | 54 | 17032464 | 2.32E-01 | 1 |
| NFRSF10C  | 648331  | 237 | 48  | 657532  | 192596  | 0 | 3  | 1 | 0 | 50 | 68 | 22960932 | 2.32E-01 | 1 |
| HIST1H2BC | 398813  | 636 | 53  | 312568  | 96476   | 0 | 1  | 1 | 0 | 50 | 45 | 13638004 | 2.32E-01 | 1 |
| YIPF3     | 1278255 | 230 | 56  | 887864  | 270916  | 0 | 4  | 0 | 0 | 50 | 54 | 19955936 | 2.32E-01 | 1 |
| IP6K1     | 1429151 | 191 | 43  | 1120332 | 312924  | 0 | 5  | 1 | 0 | 50 | 79 | 28414140 | 2.32E-01 | 1 |
| RPL34     | 160719  | 574 | 14  | 312568  | 86864   | 0 | 2  | 0 | 0 | 50 | 46 | 20184844 | 2.32E-01 | 1 |
| PHOSPHO2  | 345692  | 393 | 35  | 624780  | 156996  | 0 | 4  | 0 | 0 | 50 | 59 | 21154588 | 2.32E-01 | 1 |
| ZNF580    | 1077402 | 254 | -10 | 408688  | 149876  | 0 | 4  | 0 | 0 | 50 | 67 | 17041008 | 2.32E-01 | 1 |
| RHEB      | 660831  | 196 | 32  | 498756  | 123888  | 0 | 2  | 0 | 0 | 50 | 53 | 18681812 | 2.32E-01 | 1 |
| SCAP      | 875682  | 197 | 45  | 3170180 | 1024924 | 0 | 10 | 5 | 0 | 50 | 63 | 22037824 | 2.32E-01 | 1 |
| IL19      | 466144  | 357 | 34  | 569244  | 146316  | 0 | 2  | 1 | 0 | 50 | 48 | 17546884 | 2.32E-01 | 1 |
| BDKRB1    | 326763  | 501 | 16  | 865080  | 275544  | 0 | 3  | 0 | 0 | 50 | 56 | 21728460 | 2.32E-01 | 1 |
| SPHKAP    | 93607   | 615 | -9  | 4300836 | 1198296 | 0 | 24 | 6 | 0 | 9  | 13 | 4289800  | 2.33E-01 | 1 |
| C3orf17   | 279709  | 639 | 18  | 1474908 | 381276  | 0 | 6  | 1 | 0 | 36 | 41 | 16854108 | 2.33E-01 | 1 |
| PRKCI     | 361822  | 270 | 18  | 1599864 | 385548  | 0 | 6  | 0 | 0 | 21 | 36 | 12626252 | 2.33E-01 | 1 |
| LGALS4    | 1843355 | 219 | 37  | 845856  | 232824  | 0 | 4  | 1 | 0 | 50 | 67 | 22791476 | 2.33E-01 | 1 |
| PSMB8     | 1253457 | 401 | 26  | 812036  | 245284  | 0 | 4  | 1 | 0 | 50 | 63 | 19067004 | 2.33E-01 | 1 |
| NIP7      | 1202748 | 125 | 20  | 464580  | 132432  | 0 | 2  | 0 | 0 | 50 | 55 | 18011464 | 2.33E-01 | 1 |
| C9orf47   | 248480  | 646 | 4   | 501960  | 159132  | 0 | 1  | 0 | 0 | 50 | 43 | 20655120 | 2.33E-01 | 1 |
| RABL3     | 307936  | 475 | 10  | 626560  | 164828  | 0 | 2  | 0 | 0 | 50 | 43 | 21403432 | 2.33E-01 | 1 |
| C1QTNF2   | 197614  | 469 | 27  | 808476  | 262728  | 0 | 3  | 0 | 0 | 50 | 48 | 18013956 | 2.33E-01 | 1 |
| NPBWR2    | 1032302 | 312 | 51  | 791032  | 278036  | 0 | 4  | 1 | 0 | 50 | 69 | 20843800 | 2.34E-01 | 1 |

|          |         |      |     |         |         |   |    |   |   |    |     |          |          |   |
|----------|---------|------|-----|---------|---------|---|----|---|---|----|-----|----------|----------|---|
| OR13C3   | 146816  | 930  | -33 | 859028  | 255964  | 0 | 7  | 1 | 0 | 50 | 86  | 17955928 | 2.34E-01 | 1 |
| OR2B3    | 155147  | 738  | 1   | 785692  | 224636  | 0 | 2  | 0 | 0 | 50 | 51  | 24788992 | 2.34E-01 | 1 |
| IL2RG    | 759088  | NaN  | 27  | 962624  | 254896  | 0 | 4  | 1 | 0 | 50 | 74  | 25911460 | 2.34E-01 | 1 |
| CADM1    | 29879   | 993  | 5   | 1134216 | 323604  | 0 | 6  | 0 | 0 | 50 | 65  | 28530552 | 2.34E-01 | 1 |
| C4orf45  | 155458  | 337  | 10  | 497688  | 120684  | 0 | 3  | 0 | 0 | 50 | 75  | 21192680 | 2.34E-01 | 1 |
| UGT1A8   | 320853  | 284  | 24  | 1342832 | 377716  | 0 | 3  | 0 | 0 | 20 | 18  | 9508760  | 2.34E-01 | 1 |
| BMI1     | 195915  | 462  | 23  | 868640  | 217516  | 0 | 4  | 0 | 0 | 50 | 54  | 17596724 | 2.34E-01 | 1 |
| PACSN1   | 888245  | 207  | 32  | 1177648 | 286580  | 0 | 6  | 1 | 0 | 50 | 92  | 26125772 | 2.34E-01 | 1 |
| ALCAM    | 165047  | 784  | -3  | 1537564 | 397652  | 0 | 4  | 0 | 0 | 50 | 34  | 21561496 | 2.34E-01 | 1 |
| TMEM204  | 1366033 | 256  | 35  | 553580  | 184408  | 0 | 2  | 1 | 0 | 50 | 86  | 26448664 | 2.34E-01 | 1 |
| FAM49B   | 272194  | 242  | 6   | 866504  | 217516  | 0 | 3  | 0 | 0 | 50 | 51  | 22807496 | 2.35E-01 | 1 |
| FAM101B  | 248876  | 591  | 1   | 356712  | 113208  | 0 | 3  | 0 | 0 | 50 | 51  | 18116484 | 2.35E-01 | 1 |
| NTNG2    | 361444  | 509  | 37  | 1343188 | 383768  | 0 | 4  | 1 | 0 | 50 | 46  | 17994376 | 2.35E-01 | 1 |
| HMGB1    | 243134  | 295  | 82  | 581348  | 127804  | 0 | 3  | 0 | 0 | 50 | 69  | 20293068 | 2.35E-01 | 1 |
| BUB1     | NaN     | NaN  | NaN | 2866512 | 715560  | 0 | 13 | 2 | 0 | 50 | 118 | 40361144 | 2.35E-01 | 1 |
| GRXCR1   | 32225   | 966  | 18  | 739056  | 206124  | 0 | 5  | 2 | 0 | 19 | 28  | 7365284  | 2.35E-01 | 1 |
| TMPO     | 487754  | 218  | 21  | 2404780 | 712712  | 0 | 7  | 0 | 0 | 6  | 1   | 2386980  | 2.35E-01 | 1 |
| B3GNT5   | NaN     | NaN  | NaN | 966184  | 248132  | 0 | 8  | 0 | 0 | 50 | 116 | 39893716 | 2.35E-01 | 1 |
| ARL8A    | 649164  | 297  | 34  | 501248  | 123532  | 0 | 3  | 0 | 0 | 50 | 59  | 22559008 | 2.35E-01 | 1 |
| ADAM23   | 290387  | 726  | 16  | 2213608 | 562124  | 0 | 7  | 2 | 0 | 50 | 64  | 22258900 | 2.35E-01 | 1 |
| KAT2A    | 2171374 | 206  | 37  | 2141340 | 618372  | 0 | 8  | 0 | 0 | 30 | 24  | 12789656 | 2.35E-01 | 1 |
| RAD51C   | 524193  | 222  | 17  | 971524  | 274832  | 0 | 5  | 1 | 0 | 50 | 42  | 19503460 | 2.36E-01 | 1 |
| NT5C1A   | 974845  | 388  | 36  | 930940  | 272696  | 0 | 4  | 1 | 0 | 50 | 62  | 16757632 | 2.36E-01 | 1 |
| CPN2     | 344707  | 269  | 34  | 1323252 | 430404  | 0 | 7  | 0 | 0 | 49 | 39  | 17287004 | 2.36E-01 | 1 |
| PHF7     | 1078407 | 229  | 62  | 1030976 | 235672  | 0 | 5  | 0 | 0 | 35 | 36  | 12427960 | 2.36E-01 | 1 |
| DIRC2    | 423454  | 412  | 37  | 1191532 | 377360  | 0 | 5  | 1 | 0 | 50 | 69  | 21578228 | 2.36E-01 | 1 |
| TNRC6A   | 291928  | 342  | 19  | 5022804 | 1369176 | 0 | 16 | 5 | 0 | 35 | 35  | 15996860 | 2.36E-01 | 1 |
| GEMIN7   | 1135715 | 208  | 25  | 318976  | 108224  | 0 | 2  | 1 | 0 | 12 | 19  | 4374528  | 2.36E-01 | 1 |
| KRTAP6-2 | 22916   | 1048 | -79 | 159132  | 41652   | 0 | 2  | 0 | 0 | 50 | 84  | 16257808 | 2.36E-01 | 1 |
| TUBA1A   | 2141275 | 214  | 56  | 1134216 | 328944  | 0 | 9  | 0 | 0 | 37 | 60  | 18398436 | 2.36E-01 | 1 |
| DCTD     | 204483  | 431  | -12 | 514064  | 116056  | 0 | 2  | 1 | 0 | 21 | 22  | 8400176  | 2.36E-01 | 1 |
| TNFRSF8  | 517022  | 191  | 35  | 1519408 | 452120  | 0 | 7  | 1 | 0 | 9  | 19  | 5359224  | 2.36E-01 | 1 |
| FAM127A  | 304745  | NaN  | 42  | 282308  | 85084   | 0 | 3  | 1 | 0 | 23 | 19  | 6299420  | 2.36E-01 | 1 |

|          |         |      |     |         |        |   |    |   |   |    |     |          |          |   |
|----------|---------|------|-----|---------|--------|---|----|---|---|----|-----|----------|----------|---|
| EGR4     | 582263  | 454  | 36  | 1407624 | 489144 | 0 | 5  | 1 | 0 | 50 | 49  | 22596744 | 2.36E-01 | 1 |
| PTMA     | 1003689 | 202  | 24  | 312924  | 63012  | 0 | 1  | 0 | 0 | 50 | 79  | 20680752 | 2.37E-01 | 1 |
| NDUFB5   | 397411  | 520  | 10  | 496264  | 135992 | 0 | 3  | 1 | 0 | 50 | 51  | 19040304 | 2.37E-01 | 1 |
| CYP2C8   | 318306  | 717  | -10 | 1270208 | 339268 | 0 | 5  | 1 | 0 | 50 | 67  | 22179512 | 2.37E-01 | 1 |
| PON3     | 135737  | 327  | -2  | 925956  | 249912 | 0 | 3  | 1 | 0 | 19 | 20  | 9287328  | 2.37E-01 | 1 |
| OR9I1    | NaN     | NaN  | NaN | 770740  | 238520 | 0 | 5  | 1 | 0 | 50 | 117 | 39884104 | 2.37E-01 | 1 |
| C3orf20  | 540760  | 510  | 41  | 2299760 | 659668 | 0 | 9  | 2 | 0 | 50 | 61  | 24296288 | 2.37E-01 | 1 |
| PYCARD   | 1203752 | 478  | 17  | 484872  | 153792 | 0 | 2  | 1 | 0 | 50 | 54  | 16147804 | 2.37E-01 | 1 |
| CCDC140  | 235091  | 682  | 12  | 404772  | 120684 | 0 | 4  | 1 | 0 | 50 | 71  | 18734856 | 2.37E-01 | 1 |
| TRIM62   | 756335  | 385  | 27  | 1190820 | 351372 | 0 | 5  | 1 | 0 | 50 | 70  | 26678284 | 2.37E-01 | 1 |
| EIF4E3   | 74213   | 527  | 3   | 580636  | 168032 | 0 | 2  | 0 | 0 | 50 | 44  | 18272768 | 2.37E-01 | 1 |
| WASF1    | 127917  | 636  | 16  | 1396232 | 432184 | 0 | 5  | 0 | 0 | 10 | 7   | 3756868  | 2.37E-01 | 1 |
| SNRPB2   | 76240   | 856  | -21 | 599504  | 150232 | 0 | 3  | 0 | 0 | 50 | 67  | 21170608 | 2.38E-01 | 1 |
| ANKIB1   | 708388  | 452  | 30  | 2835540 | 737988 | 0 | 11 | 0 | 0 | 10 | 8   | 5061964  | 2.38E-01 | 1 |
| TOMM70A  | 377740  | 361  | 20  | 1584912 | 413316 | 0 | 6  | 1 | 0 | 50 | 53  | 23216184 | 2.38E-01 | 1 |
| METTL5   | 338901  | 489  | 35  | 600216  | 142044 | 0 | 2  | 0 | 0 | 50 | 36  | 15621992 | 2.38E-01 | 1 |
| SFXN4    | 789279  | 149  | 29  | 901392  | 239232 | 0 | 4  | 0 | 0 | 50 | 67  | 23654420 | 2.38E-01 | 1 |
| CCL23    | 779228  | 525  | 19  | 359916  | 97188  | 0 | 1  | 0 | 0 | 50 | 69  | 21358220 | 2.38E-01 | 1 |
| TNFRSF1A | 2670962 | 198  | 46  | 1164832 | 334640 | 0 | 5  | 1 | 0 | 4  | 7   | 2824504  | 2.38E-01 | 1 |
| CCDC71   | 1855373 | 203  | 40  | 1103600 | 400144 | 0 | 5  | 0 | 0 | 50 | 67  | 23488524 | 2.39E-01 | 1 |
| ARFRP1   | 1126597 | 202  | 36  | 534712  | 143468 | 0 | 3  | 1 | 0 | 15 | 17  | 5909600  | 2.39E-01 | 1 |
| CCDC39   | 182757  | 1031 | 2   | 2516208 | 583128 | 0 | 9  | 1 | 0 | 21 | 15  | 9560380  | 2.39E-01 | 1 |
| ARL6IP1  | 739644  | 279  | 45  | 534000  | 143112 | 0 | 2  | 0 | 0 | 50 | 58  | 19373520 | 2.39E-01 | 1 |
| NCAM1    | 68889   | 524  | -1  | 2392320 | 650412 | 0 | 8  | 2 | 0 | 50 | 65  | 23755880 | 2.39E-01 | 1 |
| DNAJC5B  | 270769  | 377  | 45  | 524032  | 133856 | 0 | 2  | 0 | 0 | 50 | 53  | 18424424 | 2.39E-01 | 1 |
| PDGFD    | 19576   | 992  | -10 | 959776  | 254540 | 0 | 6  | 0 | 0 | 50 | 71  | 24416260 | 2.39E-01 | 1 |
| STARD3NI | 161770  | 578  | 11  | 624424  | 162692 | 0 | 2  | 0 | 0 | 50 | 47  | 19802144 | 2.39E-01 | 1 |
| ZNF165   | 213170  | 562  | 23  | 1253120 | 316840 | 0 | 5  | 0 | 0 | 50 | 42  | 19286656 | 2.39E-01 | 1 |
| GSTO2    | 293891  | 376  | 8   | 635460  | 167676 | 0 | 2  | 1 | 0 | 50 | 51  | 20513788 | 2.39E-01 | 1 |
| PLVAP    | 842088  | 211  | 43  | 1125316 | 317552 | 0 | 7  | 2 | 0 | 50 | 61  | 21639816 | 2.40E-01 | 1 |
| OR51S1   | 66543   | 987  | -3  | 773944  | 263084 | 0 | 6  | 1 | 0 | 50 | 67  | 17575720 | 2.40E-01 | 1 |
| BTF3L4   | 658095  | 315  | 18  | 423996  | 106800 | 0 | 3  | 0 | 0 | 50 | 69  | 22620596 | 2.40E-01 | 1 |
| C12orf54 | 904892  | 390  | 11  | 361696  | 82592  | 0 | 4  | 0 | 0 | 50 | 73  | 15126084 | 2.40E-01 | 1 |



|          |         |      |     |         |         |   |    |   |   |    |    |          |          |   |
|----------|---------|------|-----|---------|---------|---|----|---|---|----|----|----------|----------|---|
| ARAP2    | 28107   | 1066 | 26  | 4464596 | 1130656 | 0 | 11 | 5 | 0 | 50 | 44 | 21372816 | 2.40E-01 | 1 |
| NPC2     | 749329  | 384  | 31  | 400500  | 103596  | 0 | 1  | 0 | 0 | 50 | 65 | 22029992 | 2.40E-01 | 1 |
| TMEM55A  | 104917  | 935  | 1   | 659312  | 192952  | 0 | 4  | 0 | 0 | 50 | 66 | 21354660 | 2.40E-01 | 1 |
| SETD6    | 661173  | 320  | 1   | 1196872 | 353864  | 0 | 7  | 0 | 0 | 50 | 69 | 20724184 | 2.40E-01 | 1 |
| MARCAD   | 128578  | 311  | 16  | 2741200 | 653972  | 0 | 11 | 1 | 0 | 10 | 8  | 3978656  | 2.41E-01 | 1 |
| AQP8     | 189953  | 551  | 12  | 647208  | 215736  | 0 | 2  | 0 | 0 | 50 | 54 | 22679336 | 2.41E-01 | 1 |
| ZNF615   | 444655  | 838  | -57 | 1892140 | 466004  | 0 | 9  | 4 | 0 | 37 | 56 | 12206528 | 2.41E-01 | 1 |
| FAM172A  | 264052  | 622  | 6   | 1106092 | 272696  | 0 | 4  | 0 | 0 | 50 | 43 | 18713496 | 2.41E-01 | 1 |
| RBBP6    | 283287  | 204  | 25  | 4619456 | 1253476 | 0 | 20 | 5 | 0 | 21 | 22 | 8073368  | 2.42E-01 | 1 |
| C5orf28  | 497364  | 369  | 1   | 542188  | 158420  | 0 | 3  | 0 | 0 | 50 | 51 | 21692504 | 2.42E-01 | 1 |
| FOXN1    | 1517567 | 225  | 24  | 1601644 | 509792  | 0 | 6  | 3 | 0 | 50 | 49 | 17603488 | 2.42E-01 | 1 |
| SMAD1    | 204089  | 1182 | 24  | 1200076 | 314348  | 0 | 4  | 0 | 0 | 50 | 39 | 19909656 | 2.42E-01 | 1 |
| PLEKHB1  | 547370  | 311  | 38  | 627272  | 184408  | 0 | 2  | 0 | 0 | 50 | 41 | 17143180 | 2.42E-01 | 1 |
| SNX33    | 586224  | 231  | 34  | 1451768 | 396940  | 0 | 7  | 2 | 0 | 50 | 42 | 19685020 | 2.42E-01 | 1 |
| EGR1     | 1202314 | 205  | 51  | 1322184 | 425064  | 0 | 6  | 0 | 0 | 50 | 47 | 21712084 | 2.42E-01 | 1 |
| PPP3R1   | 204289  | 594  | 23  | 465648  | 103596  | 0 | 1  | 0 | 0 | 50 | 48 | 21499196 | 2.42E-01 | 1 |
| GINS1    | 611174  | 335  | -5  | 523676  | 133144  | 0 | 2  | 0 | 0 | 50 | 58 | 19428344 | 2.42E-01 | 1 |
| ARHGAP11 | 57425   | 639  | 11  | 1269140 | 311500  | 0 | 6  | 1 | 0 | 50 | 64 | 21969472 | 2.42E-01 | 1 |
| EPHX3    | 557083  | 381  | 20  | 904240  | 282308  | 0 | 6  | 3 | 0 | 9  | 17 | 5213264  | 2.43E-01 | 1 |
| ZNF593   | 783481  | 212  | 23  | 336420  | 106800  | 0 | 1  | 0 | 0 | 50 | 65 | 22539072 | 2.43E-01 | 1 |
| KLHL9    | 232155  | 466  | -14 | 1555364 | 424708  | 0 | 7  | 2 | 0 | 50 | 45 | 18385976 | 2.43E-01 | 1 |
| OR5H6    | 391500  | 849  | -2  | 813460  | 231044  | 0 | 5  | 0 | 0 | 50 | 61 | 20695704 | 2.43E-01 | 1 |
| GLOD5    | 823539  | NaN  | 29  | 418300  | 112496  | 0 | 3  | 0 | 0 | 50 | 93 | 24512736 | 2.43E-01 | 1 |
| CBLB     | 169365  | 628  | 0   | 2519056 | 707372  | 0 | 10 | 2 | 0 | 3  | 3  | 2723756  | 2.43E-01 | 1 |
| OR5V1    | 329776  | 872  | 7   | 796728  | 236028  | 0 | 4  | 0 | 0 | 50 | 77 | 21945976 | 2.43E-01 | 1 |
| MYOM3    | 817104  | 171  | 22  | 3715216 | 1045928 | 0 | 13 | 4 | 0 | 50 | 52 | 19825996 | 2.43E-01 | 1 |
| L2HGDH   | 666223  | 337  | 28  | 1184056 | 343184  | 0 | 4  | 0 | 0 | 18 | 14 | 8109680  | 2.43E-01 | 1 |
| NRXN1    | 8891    | 1372 | -25 | 4160928 | 1171596 | 0 | 25 | 7 | 0 | 8  | 18 | 4028852  | 2.43E-01 | 1 |
| GIMAP5   | 734961  | 689  | 14  | 776792  | 218584  | 0 | 5  | 1 | 0 | 50 | 53 | 19509868 | 2.44E-01 | 1 |
| RIOK2    | 381706  | 614  | 28  | 1473840 | 364188  | 0 | 6  | 0 | 0 | 29 | 36 | 18157424 | 2.44E-01 | 1 |
| KIF6     | 77217   | 940  | 26  | 2165192 | 542188  | 0 | 9  | 0 | 0 | 17 | 13 | 6753676  | 2.44E-01 | 1 |
| DLX3     | 1160590 | 191  | 12  | 713780  | 217516  | 0 | 5  | 2 | 0 | 8  | 12 | 3368472  | 2.44E-01 | 1 |
| FAM98A   | 116876  | 865  | 5   | 1317200 | 377716  | 0 | 5  | 1 | 0 | 50 | 53 | 17621644 | 2.44E-01 | 1 |

|          |         |      |     |         |         |   |    |   |   |    |    |          |          |   |
|----------|---------|------|-----|---------|---------|---|----|---|---|----|----|----------|----------|---|
| KCNIP4   | 35439   | 1264 | 3   | 787116  | 187968  | 0 | 4  | 0 | 0 | 50 | 41 | 19681104 | 2.44E-01 | 1 |
| OR5A1    | 430021  | 507  | -1  | 770384  | 242080  | 0 | 4  | 0 | 0 | 50 | 65 | 21241096 | 2.44E-01 | 1 |
| OGG1     | 954590  | 264  | 39  | 1495200 | 394092  | 0 | 5  | 1 | 0 | 50 | 62 | 26339728 | 2.44E-01 | 1 |
| LRRC37B  | 692401  | 356  | 23  | 2395524 | 690996  | 0 | 11 | 2 | 0 | 15 | 15 | 6585644  | 2.44E-01 | 1 |
| C11orf49 | 1268399 | 373  | 31  | 1011752 | 282664  | 0 | 3  | 2 | 0 | 50 | 56 | 19008976 | 2.44E-01 | 1 |
| OSBPL3   | 254504  | 312  | 28  | 2338920 | 595944  | 0 | 11 | 3 | 0 | 50 | 60 | 19819588 | 2.45E-01 | 1 |
| CDCA7    | 255854  | 559  | 28  | 1175512 | 307940  | 0 | 5  | 1 | 0 | 50 | 55 | 21637680 | 2.45E-01 | 1 |
| PPP1R3A  | 12173   | 914  | -21 | 2856900 | 756144  | 0 | 14 | 2 | 0 | 5  | 6  | 2728028  | 2.45E-01 | 1 |
| GBP1     | 337373  | 745  | 2   | 1543260 | 399432  | 0 | 9  | 1 | 0 | 50 | 62 | 23640892 | 2.45E-01 | 1 |
| HOXC13   | 1257445 | 274  | 23  | 808120  | 256676  | 0 | 4  | 2 | 0 | 5  | 2  | 1519764  | 2.45E-01 | 1 |
| SETD5    | 781227  | 404  | 34  | 3632268 | 1076544 | 0 | 13 | 1 | 0 | 24 | 34 | 13926720 | 2.45E-01 | 1 |
| CXCL9    | 489826  | 399  | 43  | 332148  | 86508   | 0 | 2  | 0 | 0 | 50 | 51 | 20872992 | 2.45E-01 | 1 |
| SEC61A2  | 334974  | 227  | 29  | 1286228 | 365968  | 0 | 5  | 1 | 0 | 16 | 22 | 10298368 | 2.46E-01 | 1 |
| TCP10    | 254009  | 704  | 1   | 840516  | 239232  | 0 | 3  | 0 | 0 | 38 | 53 | 18767964 | 2.46E-01 | 1 |
| CPB1     | 276750  | 681  | -16 | 1087580 | 296548  | 0 | 4  | 2 | 0 | 50 | 79 | 23784716 | 2.46E-01 | 1 |
| S100A5   | 1454773 | 186  | 26  | 299752  | 68708   | 0 | 2  | 0 | 0 | 50 | 56 | 19376724 | 2.46E-01 | 1 |
| FAM150B  | 304765  | 624  | -18 | 389464  | 122108  | 0 | 1  | 0 | 0 | 50 | 45 | 17740904 | 2.46E-01 | 1 |
| IGFBP1   | 146330  | 623  | 8   | 652192  | 193664  | 0 | 4  | 0 | 0 | 50 | 55 | 20455404 | 2.46E-01 | 1 |
| PRDM9    | 15618   | 1069 | -19 | 2308660 | 601640  | 0 | 10 | 2 | 0 | 21 | 22 | 7730896  | 2.46E-01 | 1 |
| LY96     | 250079  | 468  | 26  | 435032  | 102172  | 0 | 1  | 0 | 0 | 50 | 39 | 17338624 | 2.47E-01 | 1 |
| STX3     | 395993  | 494  | 8   | 820224  | 205056  | 0 | 3  | 0 | 0 | 50 | 53 | 19654760 | 2.47E-01 | 1 |
| CELF3    | 1210719 | 255  | 29  | 1220368 | 330368  | 0 | 7  | 0 | 0 | 50 | 45 | 17707084 | 2.47E-01 | 1 |
| GPR107   | 622734  | 222  | 29  | 1581708 | 425064  | 0 | 6  | 2 | 0 | 36 | 49 | 13906072 | 2.47E-01 | 1 |
| LILRB3   | 717623  | 458  | -6  | 1604492 | 474904  | 0 | 9  | 3 | 0 | 50 | 58 | 18028196 | 2.47E-01 | 1 |
| RAE1     | 181292  | 604  | 9   | 985408  | 243860  | 0 | 3  | 0 | 0 | 14 | 10 | 8165928  | 2.47E-01 | 1 |
| PSD      | 975992  | 178  | 39  | 2525464 | 826988  | 0 | 11 | 2 | 0 | 26 | 34 | 12137108 | 2.47E-01 | 1 |
| ENOPH1   | 684394  | 387  | 46  | 674976  | 185832  | 0 | 2  | 0 | 0 | 50 | 53 | 22010768 | 2.47E-01 | 1 |
| THSD7B   | 11902   | 824  | -16 | 4094356 | 1071560 | 0 | 20 | 4 | 0 | 50 | 68 | 22737364 | 2.47E-01 | 1 |
| DAAM2    | 53428   | 914  | 26  | 2770748 | 753652  | 0 | 9  | 3 | 0 | 50 | 46 | 22158864 | 2.47E-01 | 1 |
| HIST1H1E | 398813  | 636  | 53  | 534000  | 175152  | 0 | 4  | 2 | 0 | 48 | 43 | 12614504 | 2.47E-01 | 1 |
| XPOT     | 466767  | 402  | -15 | 2532940 | 655040  | 0 | 10 | 0 | 0 | 3  | 1  | 1846572  | 2.47E-01 | 1 |
| PCDH1    | 760355  | 281  | 23  | 3083316 | 987900  | 0 | 13 | 3 | 0 | 38 | 50 | 20134292 | 2.47E-01 | 1 |
| RGS7     | 134467  | 834  | -27 | 1325032 | 311144  | 0 | 7  | 0 | 0 | 50 | 74 | 19741980 | 2.47E-01 | 1 |

|          |         |      |     |          |         |   |    |    |   |    |    |          |          |   |
|----------|---------|------|-----|----------|---------|---|----|----|---|----|----|----------|----------|---|
| RYR2     | 86856   | 1024 | -24 | 12993288 | 3368472 | 0 | 72 | 23 | 0 | 20 | 53 | 11085484 | 2.48E-01 | 1 |
| MSLN     | 1187310 | 273  | 39  | 1569248  | 520828  | 0 | 7  | 1  | 0 | 50 | 70 | 23301268 | 2.48E-01 | 1 |
| CEP76    | 453636  | 206  | 41  | 1687084  | 474548  | 0 | 6  | 2  | 0 | 50 | 44 | 16761192 | 2.48E-01 | 1 |
| PTCD2    | 421218  | 342  | 27  | 1021008  | 265932  | 0 | 2  | 0  | 0 | 39 | 21 | 15306932 | 2.48E-01 | 1 |
| ACD      | 1065785 | 147  | 41  | 1359208  | 452120  | 0 | 7  | 2  | 0 | 49 | 79 | 26733820 | 2.48E-01 | 1 |
| TLE4     | 45472   | 956  | -9  | 1998940  | 562124  | 0 | 6  | 0  | 0 | 4  | 1  | 1789968  | 2.49E-01 | 1 |
| MMACHC   | 809450  | 176  | 25  | 698472   | 221076  | 0 | 2  | 0  | 0 | 50 | 51 | 21873352 | 2.49E-01 | 1 |
| OSCP1    | 608987  | 181  | 29  | 1128164  | 298684  | 0 | 3  | 1  | 0 | 50 | 43 | 16456456 | 2.49E-01 | 1 |
| CEBPZ    | 488101  | 253  | 42  | 2782140  | 666432  | 0 | 12 | 1  | 0 | 24 | 18 | 8787504  | 2.49E-01 | 1 |
| GIMAP7   | 563029  | 671  | 24  | 772876   | 195800  | 0 | 4  | 0  | 0 | 25 | 19 | 9400180  | 2.49E-01 | 1 |
| OSBPL8   | 586978  | 492  | 3   | 2366332  | 583484  | 0 | 8  | 1  | 0 | 42 | 41 | 16703876 | 2.49E-01 | 1 |
| GNL3     | 1217701 | 272  | 47  | 1468144  | 362408  | 0 | 8  | 1  | 0 | 50 | 99 | 29167792 | 2.50E-01 | 1 |
| ZKSCAN3  | 273677  | 592  | 31  | 1382704  | 365612  | 0 | 5  | 1  | 0 | 50 | 49 | 21622728 | 2.50E-01 | 1 |
| SYT1     | 186847  | 899  | -21 | 1105024  | 284444  | 0 | 7  | 2  | 0 | 23 | 42 | 9565008  | 2.50E-01 | 1 |
| RIC8A    | 1463610 | 437  | 24  | 1348528  | 413672  | 0 | 4  | 1  | 0 | 6  | 2  | 2533652  | 2.50E-01 | 1 |
| BFSP1    | 552334  | 239  | -23 | 1674268  | 495908  | 0 | 6  | 1  | 0 | 49 | 72 | 20392748 | 2.50E-01 | 1 |
| PDXK     | 919787  | 170  | 68  | 827344   | 218228  | 0 | 2  | 1  | 0 | 25 | 22 | 7822032  | 2.50E-01 | 1 |
| GLT8D1   | 1217701 | 272  | 47  | 973660   | 256676  | 0 | 5  | 0  | 0 | 50 | 99 | 29167792 | 2.50E-01 | 1 |
| ZNF483   | 437885  | 309  | 22  | 1961560  | 498044  | 0 | 8  | 0  | 0 | 6  | 3  | 2123540  | 2.50E-01 | 1 |
| ASTL     | 821367  | 251  | 45  | 1082952  | 334284  | 0 | 4  | 1  | 0 | 50 | 59 | 19377792 | 2.50E-01 | 1 |
| PTPN9    | 669446  | 257  | 47  | 1534716  | 419724  | 0 | 9  | 2  | 0 | 50 | 57 | 21914292 | 2.51E-01 | 1 |
| NAT8L    | 717079  | 321  | 34  | 729800   | 249556  | 0 | 2  | 0  | 0 | 50 | 53 | 24191980 | 2.51E-01 | 1 |
| ZNF429   | 164342  | 1162 | -59 | 1746180  | 429336  | 0 | 11 | 1  | 0 | 34 | 50 | 11607024 | 2.51E-01 | 1 |
| VSIG2    | 168652  | 622  | 14  | 816308   | 264508  | 0 | 3  | 1  | 0 | 50 | 50 | 19749100 | 2.51E-01 | 1 |
| ITGB1BP2 | 728362  | NaN  | 26  | 921328   | 238520  | 0 | 4  | 0  | 0 | 50 | 84 | 28751272 | 2.51E-01 | 1 |
| SH2D6    | 1067736 | 180  | 39  | 436456   | 144536  | 0 | 3  | 0  | 0 | 50 | 68 | 23641960 | 2.51E-01 | 1 |
| NPY      | 148162  | 478  | 6   | 247064   | 77608   | 0 | 2  | 0  | 0 | 50 | 60 | 18240372 | 2.51E-01 | 1 |
| FAM26D   | 261450  | 479  | 19  | 329656   | 85796   | 0 | 2  | 0  | 0 | 50 | 57 | 23330104 | 2.51E-01 | 1 |
| SLC35A4  | 706371  | 319  | 29  | 753652   | 287648  | 0 | 2  | 1  | 0 | 50 | 44 | 23563640 | 2.51E-01 | 1 |
| NECAP1   | 142724  | 300  | 23  | 714848   | 201496  | 0 | 2  | 1  | 0 | 50 | 43 | 20540844 | 2.52E-01 | 1 |
| PPP3CC   | 701231  | 142  | 41  | 1349596  | 349592  | 0 | 5  | 1  | 0 | 50 | 50 | 21519844 | 2.52E-01 | 1 |
| LMO2     | 748742  | 394  | 32  | 571380   | 171948  | 0 | 2  | 0  | 0 | 50 | 74 | 25077352 | 2.52E-01 | 1 |
| ZP1      | 794900  | 522  | 47  | 1605916  | 492704  | 0 | 4  | 1  | 0 | 50 | 51 | 21913580 | 2.52E-01 | 1 |

|          |         |      |     |         |         |   |    |   |   |    |    |          |          |   |
|----------|---------|------|-----|---------|---------|---|----|---|---|----|----|----------|----------|---|
| PIK3C3   | 38836   | 1300 | 13  | 2363840 | 585976  | 0 | 8  | 1 | 0 | 50 | 57 | 22353952 | 2.52E-01 | 1 |
| ZC3H13   | 576966  | 679  | 49  | 4006780 | 1075832 | 0 | 11 | 1 | 0 | 20 | 9  | 6734452  | 2.52E-01 | 1 |
| RDH16    | 2103486 | 286  | 26  | 793524  | 238164  | 0 | 4  | 1 | 0 | 50 | 85 | 24401308 | 2.52E-01 | 1 |
| BAG4     | 705837  | 277  | 46  | 1140268 | 344252  | 0 | 4  | 0 | 0 | 50 | 54 | 23183788 | 2.53E-01 | 1 |
| RANBP2   | 365106  | 418  | 20  | 8262404 | 2190112 | 0 | 25 | 4 | 0 | 38 | 32 | 17730580 | 2.53E-01 | 1 |
| MRPL35   | 773440  | 425  | 39  | 483448  | 141332  | 0 | 3  | 0 | 0 | 50 | 55 | 19342548 | 2.53E-01 | 1 |
| LECT2    | 489402  | 443  | 19  | 392312  | 107512  | 0 | 3  | 0 | 0 | 50 | 52 | 16320820 | 2.53E-01 | 1 |
| GPD1     | 1021750 | 192  | 57  | 897832  | 255608  | 0 | 5  | 0 | 0 | 6  | 3  | 1730516  | 2.53E-01 | 1 |
| CHPT1    | 347543  | 338  | 8   | 1073696 | 304024  | 0 | 5  | 2 | 0 | 50 | 48 | 22295212 | 2.53E-01 | 1 |
| NADSYN1  | 546912  | 626  | 50  | 1851200 | 499468  | 0 | 7  | 1 | 0 | 33 | 22 | 10237492 | 2.53E-01 | 1 |
| OR2T27   | 141426  | 710  | -10 | 780708  | 237096  | 0 | 3  | 0 | 0 | 50 | 70 | 30005816 | 2.53E-01 | 1 |
| RBM5     | 965735  | 196  | 35  | 2167328 | 549664  | 0 | 8  | 1 | 0 | 21 | 35 | 8909968  | 2.54E-01 | 1 |
| DHRS7    | 277355  | 547  | 4   | 867216  | 247776  | 0 | 4  | 1 | 0 | 50 | 68 | 22287380 | 2.54E-01 | 1 |
| UBXN6    | 2078211 | 278  | 37  | 1132080 | 328944  | 0 | 6  | 2 | 0 | 45 | 47 | 19025708 | 2.54E-01 | 1 |
| MRPS34   | 1604603 | 288  | 36  | 541832  | 170524  | 0 | 3  | 1 | 0 | 50 | 49 | 20717064 | 2.54E-01 | 1 |
| ASB15    | 86799   | 644  | -7  | 1506948 | 418656  | 0 | 6  | 1 | 0 | 50 | 55 | 22390620 | 2.54E-01 | 1 |
| PLAT     | 580110  | 382  | 45  | 1472772 | 386616  | 0 | 5  | 1 | 0 | 32 | 33 | 14971936 | 2.54E-01 | 1 |
| LAPTM4A  | 520645  | 166  | 26  | 612676  | 162692  | 0 | 4  | 0 | 0 | 50 | 72 | 23124692 | 2.54E-01 | 1 |
| SRPRB    | 513771  | 523  | 23  | 694556  | 202564  | 0 | 5  | 0 | 0 | 41 | 46 | 12998628 | 2.54E-01 | 1 |
| DGKH     | 191275  | 407  | 57  | 3197236 | 840872  | 0 | 11 | 1 | 0 | 19 | 19 | 7155600  | 2.54E-01 | 1 |
| OGN      | 537639  | 574  | 47  | 776080  | 207548  | 0 | 3  | 0 | 0 | 50 | 52 | 17802848 | 2.55E-01 | 1 |
| CUL4B    | 416744  | NaN  | 14  | 2436108 | 593808  | 0 | 8  | 0 | 0 | 5  | 11 | 5595608  | 2.55E-01 | 1 |
| REV1     | 383815  | 639  | 27  | 3235684 | 869708  | 0 | 7  | 1 | 0 | 15 | 11 | 10603104 | 2.55E-01 | 1 |
| AMY2B    | 31276   | 974  | -19 | 1342832 | 342472  | 0 | 6  | 2 | 0 | 50 | 91 | 24336872 | 2.55E-01 | 1 |
| OR51Q1   | 99042   | 1030 | 1   | 779284  | 243860  | 0 | 3  | 2 | 0 | 13 | 6  | 3056616  | 2.55E-01 | 1 |
| TDRKH    | 1062482 | 255  | 29  | 1454972 | 401212  | 0 | 4  | 1 | 0 | 50 | 50 | 22423016 | 2.55E-01 | 1 |
| SGMS2    | 144491  | 683  | 6   | 935212  | 254540  | 0 | 3  | 1 | 0 | 50 | 66 | 26688964 | 2.55E-01 | 1 |
| TMEM62   | 843516  | 333  | 42  | 1657892 | 461020  | 0 | 8  | 3 | 0 | 46 | 58 | 20300900 | 2.55E-01 | 1 |
| FZD6     | 428438  | 615  | 23  | 1796020 | 494840  | 0 | 10 | 0 | 0 | 6  | 5  | 2716992  | 2.55E-01 | 1 |
| HIST1H4C | 398813  | 636  | 53  | 249556  | 85796   | 0 | 2  | 0 | 0 | 50 | 45 | 13638004 | 2.55E-01 | 1 |
| ZBTB12   | 2485614 | 188  | 36  | 1124604 | 353508  | 0 | 5  | 2 | 0 | 36 | 35 | 13374208 | 2.55E-01 | 1 |
| ALAS1    | 1114737 | 181  | 52  | 1634396 | 462088  | 0 | 8  | 3 | 0 | 16 | 23 | 7041324  | 2.55E-01 | 1 |
| DNA2     | 761140  | 294  | 29  | 2973312 | 787116  | 0 | 9  | 0 | 0 | 14 | 11 | 7662544  | 2.56E-01 | 1 |

|          |         |     |     |         |         |   |    |   |   |    |    |          |          |   |
|----------|---------|-----|-----|---------|---------|---|----|---|---|----|----|----------|----------|---|
| NUDT11   | 118616  | NaN | 31  | 413316  | 120684  | 0 | 2  | 0 | 0 | 50 | 47 | 21852348 | 2.56E-01 | 1 |
| POU3F1   | 448782  | 374 | 32  | 1074408 | 375936  | 0 | 4  | 1 | 0 | 50 | 48 | 18799292 | 2.56E-01 | 1 |
| RRS1     | 259302  | 268 | 12  | 892848  | 279816  | 0 | 3  | 1 | 0 | 50 | 51 | 20442588 | 2.56E-01 | 1 |
| ITGB1BP1 | 624421  | 340 | 37  | 532932  | 136704  | 0 | 4  | 0 | 0 | 50 | 57 | 22754808 | 2.56E-01 | 1 |
| CFHR2    | 217857  | 853 | -24 | 707016  | 180492  | 0 | 5  | 1 | 0 | 50 | 67 | 19868716 | 2.56E-01 | 1 |
| HSPB1    | 850568  | 195 | 53  | 506232  | 162336  | 0 | 2  | 0 | 0 | 50 | 69 | 21293072 | 2.56E-01 | 1 |
| CLEC4C   | 206421  | 467 | 15  | 575652  | 131364  | 0 | 2  | 0 | 0 | 50 | 61 | 21156368 | 2.56E-01 | 1 |
| PKNOX2   | 412479  | 731 | 16  | 1224640 | 333572  | 0 | 5  | 2 | 0 | 50 | 54 | 21187696 | 2.57E-01 | 1 |
| RAC3     | 3814891 | 211 | 28  | 493060  | 146672  | 0 | 3  | 0 | 0 | 32 | 25 | 10015348 | 2.57E-01 | 1 |
| ARPC5    | 608114  | 407 | 24  | 390532  | 109292  | 0 | 4  | 1 | 0 | 1  | 3  | 1400860  | 2.57E-01 | 1 |
| FOXP2    | 42204   | 828 | -13 | 2027064 | 513708  | 0 | 9  | 0 | 0 | 50 | 83 | 28125424 | 2.57E-01 | 1 |
| TNFRSF25 | 644634  | 203 | 44  | 1106448 | 304380  | 0 | 4  | 0 | 0 | 50 | 75 | 21467868 | 2.57E-01 | 1 |
| PSME4    | 238848  | 489 | 9   | 4832700 | 1274124 | 0 | 17 | 3 | 0 | 50 | 50 | 20218308 | 2.57E-01 | 1 |
| MEM184A  | 595899  | 243 | 38  | 1044860 | 313636  | 0 | 3  | 0 | 0 | 31 | 45 | 14566808 | 2.57E-01 | 1 |
| C4BPA    | 501293  | 142 | 22  | 1556788 | 406196  | 0 | 7  | 4 | 0 | 19 | 20 | 7289100  | 2.57E-01 | 1 |
| PHLPP1   | 229775  | 442 | 34  | 4241028 | 1331796 | 0 | 9  | 1 | 0 | 10 | 11 | 6474572  | 2.57E-01 | 1 |
| LIMS1    | 363356  | 408 | 30  | 878964  | 203988  | 0 | 4  | 1 | 0 | 23 | 24 | 9018904  | 2.57E-01 | 1 |
| UBE2V2   | 890573  | 464 | 31  | 384480  | 98256   | 0 | 1  | 0 | 0 | 50 | 60 | 22040672 | 2.57E-01 | 1 |
| CRELD1   | 950574  | 170 | 54  | 1271276 | 331792  | 0 | 5  | 0 | 0 | 39 | 56 | 16713132 | 2.57E-01 | 1 |
| MASP2    | 639826  | 307 | 33  | 1766828 | 496264  | 0 | 5  | 1 | 0 | 50 | 54 | 26043892 | 2.58E-01 | 1 |
| MRPS31   | 270527  | 470 | 44  | 1029908 | 268780  | 0 | 6  | 0 | 0 | 50 | 78 | 23838472 | 2.58E-01 | 1 |
| FER      | 140251  | 741 | 20  | 2195808 | 520116  | 0 | 10 | 2 | 0 | 50 | 50 | 21075556 | 2.58E-01 | 1 |
| HELZ     | 345587  | 399 | -25 | 4992544 | 1360988 | 0 | 22 | 4 | 0 | 4  | 6  | 3179080  | 2.58E-01 | 1 |
| ATXN7L3  | 930750  | 175 | 41  | 955504  | 231044  | 0 | 5  | 1 | 0 | 50 | 69 | 21793252 | 2.58E-01 | 1 |
| GULP1    | 98119   | 869 | -12 | 821292  | 198648  | 0 | 4  | 0 | 0 | 50 | 94 | 32568304 | 2.58E-01 | 1 |
| SPP1     | 445914  | 367 | 8   | 833752  | 201140  | 0 | 3  | 0 | 0 | 50 | 71 | 27385300 | 2.58E-01 | 1 |
| AURKAIP1 | 1736268 | 273 | 28  | 496976  | 159844  | 0 | 2  | 0 | 0 | 50 | 63 | 20986200 | 2.58E-01 | 1 |
| PLEKHG7  | 244442  | 509 | 2   | 1008904 | 251336  | 0 | 4  | 0 | 0 | 50 | 53 | 21293784 | 2.58E-01 | 1 |
| SLC7A14  | 372782  | 466 | 24  | 1918484 | 580636  | 0 | 7  | 1 | 0 | 8  | 11 | 6005008  | 2.58E-01 | 1 |
| SEC16A   | 1413299 | 233 | 44  | 5891088 | 1792104 | 0 | 14 | 1 | 0 | 1  | 1  | 1960492  | 2.58E-01 | 1 |
| LRRN1    | 61807   | 888 | -18 | 1795308 | 501960  | 0 | 7  | 2 | 0 | 25 | 29 | 12360676 | 2.59E-01 | 1 |
| OR2AT4   | 752176  | 556 | 48  | 777148  | 250268  | 0 | 3  | 0 | 0 | 50 | 54 | 23399524 | 2.59E-01 | 1 |
| LACRT    | 615189  | 494 | 31  | 363120  | 103596  | 0 | 1  | 0 | 0 | 50 | 83 | 25232212 | 2.59E-01 | 1 |

|          |         |     |     |         |        |   |    |   |   |    |    |          |          |   |
|----------|---------|-----|-----|---------|--------|---|----|---|---|----|----|----------|----------|---|
| TREX1    | 1480689 | 223 | 45  | 871488  | 316128 | 0 | 6  | 1 | 0 | 50 | 66 | 22607068 | 2.59E-01 | 1 |
| FAM173B  | 623675  | 325 | 5   | 596656  | 172304 | 0 | 2  | 1 | 0 | 50 | 72 | 28009724 | 2.59E-01 | 1 |
| P4HB     | 3798594 | 211 | 19  | 1323608 | 349948 | 0 | 6  | 3 | 0 | 28 | 25 | 7704552  | 2.59E-01 | 1 |
| BUB3     | 213809  | 769 | 0   | 862944  | 231756 | 0 | 2  | 0 | 0 | 50 | 40 | 19819588 | 2.59E-01 | 1 |
| LRRC17   | 749653  | 456 | 23  | 1158780 | 287292 | 0 | 6  | 0 | 0 | 50 | 62 | 21362136 | 2.59E-01 | 1 |
| FRMD8    | 4112809 | 242 | 50  | 1168036 | 362408 | 0 | 6  | 1 | 0 | 27 | 30 | 12483852 | 2.59E-01 | 1 |
| β6GALNAc | 999845  | 191 | 31  | 1521544 | 438236 | 0 | 4  | 0 | 0 | 2  | 1  | 1460668  | 2.60E-01 | 1 |
| NDUFB4   | 317876  | 449 | 0   | 358848  | 104664 | 0 | 3  | 1 | 0 | 13 | 19 | 6550400  | 2.60E-01 | 1 |
| FLOT2    | 1834230 | 220 | 37  | 1103600 | 313636 | 0 | 5  | 1 | 0 | 50 | 67 | 23772612 | 2.60E-01 | 1 |
| NR0B2    | 1025094 | 188 | 34  | 624424  | 206480 | 0 | 3  | 0 | 0 | 50 | 62 | 18463584 | 2.60E-01 | 1 |
| OR2AG2   | 424776  | 548 | 8   | 765756  | 249912 | 0 | 6  | 1 | 0 | 50 | 65 | 19789684 | 2.60E-01 | 1 |
| HEATR3   | 276539  | 476 | 3   | 1754724 | 487008 | 0 | 5  | 1 | 0 | 25 | 38 | 14902516 | 2.60E-01 | 1 |
| STK32A   | 95084   | 839 | -7  | 1100396 | 255964 | 0 | 5  | 0 | 0 | 14 | 10 | 4642952  | 2.60E-01 | 1 |
| CGRRF1   | 559596  | 348 | 34  | 872200  | 218228 | 0 | 4  | 0 | 0 | 50 | 55 | 22288804 | 2.60E-01 | 1 |
| PAX9     | 55912   | 494 | -39 | 837668  | 270916 | 0 | 4  | 0 | 0 | 24 | 31 | 10519444 | 2.60E-01 | 1 |
| EPGN     | 172790  | 402 | 18  | 353508  | 90780  | 0 | 1  | 0 | 0 | 50 | 53 | 17866572 | 2.61E-01 | 1 |
| NDUFAF3  | 1799657 | 241 | 41  | 459952  | 149876 | 0 | 4  | 0 | 0 | 50 | 76 | 22684320 | 2.61E-01 | 1 |
| DHX38    | 414449  | 479 | 9   | 3174096 | 871488 | 0 | 8  | 2 | 0 | 36 | 39 | 16830256 | 2.61E-01 | 1 |
| SNRNP27  | 844060  | 221 | 37  | 412248  | 111072 | 0 | 1  | 0 | 0 | 50 | 49 | 17507368 | 2.61E-01 | 1 |
| ZNF45    | 464210  | 419 | -38 | 1768608 | 436812 | 0 | 7  | 2 | 0 | 50 | 78 | 19959496 | 2.61E-01 | 1 |
| PPP1R1B  | 1164935 | 239 | 28  | 540052  | 142400 | 0 | 3  | 0 | 0 | 50 | 54 | 18916772 | 2.61E-01 | 1 |
| GK2      | 112173  | 875 | 0   | 1373804 | 403348 | 0 | 8  | 1 | 0 | 50 | 54 | 22887240 | 2.61E-01 | 1 |
| EMILIN3  | 383021  | 309 | 5   | 1836604 | 633680 | 0 | 10 | 2 | 0 | 50 | 64 | 25202664 | 2.61E-01 | 1 |
| SFI1     | 741049  | 313 | 37  | 3233904 | 887508 | 0 | 10 | 2 | 0 | 6  | 9  | 5136012  | 2.61E-01 | 1 |
| CTSF     | 1343990 | 194 | 62  | 1247424 | 359916 | 0 | 5  | 0 | 0 | 13 | 11 | 5250288  | 2.61E-01 | 1 |
| FNIP1    | 346839  | 637 | 27  | 3029560 | 782132 | 0 | 11 | 2 | 0 | 8  | 10 | 5859048  | 2.61E-01 | 1 |
| JAM3     | 270247  | 601 | 6   | 909936  | 267000 | 0 | 3  | 0 | 0 | 50 | 44 | 20916780 | 2.61E-01 | 1 |
| CCDC33   | 604483  | 222 | 45  | 2161276 | 618728 | 0 | 5  | 0 | 0 | 7  | 5  | 4016036  | 2.61E-01 | 1 |
| VPS54    | 352987  | 407 | 20  | 2572456 | 655040 | 0 | 6  | 3 | 0 | 50 | 46 | 23507748 | 2.61E-01 | 1 |
| β4GALNT2 | 868792  | 346 | 21  | 1454972 | 425776 | 0 | 5  | 0 | 0 | 29 | 24 | 11042052 | 2.61E-01 | 1 |
| ACSM5    | 181483  | 823 | 6   | 1483808 | 430048 | 0 | 8  | 0 | 0 | 14 | 14 | 5134588  | 2.61E-01 | 1 |
| PI4K2B   | 218037  | 523 | 28  | 1257036 | 325740 | 0 | 3  | 1 | 0 | 44 | 45 | 17922820 | 2.62E-01 | 1 |
| HNRNPA1  | 753625  | 205 | 59  | 983272  | 254540 | 0 | 7  | 1 | 0 | 50 | 68 | 19974092 | 2.62E-01 | 1 |

|          |         |     |     |         |         |   |    |   |   |    |    |          |          |   |
|----------|---------|-----|-----|---------|---------|---|----|---|---|----|----|----------|----------|---|
| SLCO6A1  | 132386  | 647 | -12 | 1851200 | 511216  | 0 | 6  | 1 | 0 | 50 | 51 | 24155312 | 2.62E-01 | 1 |
| HOXC9    | 1257445 | 274 | 23  | 650412  | 192240  | 0 | 4  | 0 | 0 | 50 | 62 | 22406640 | 2.62E-01 | 1 |
| TNFSF4   | 293612  | 492 | -1  | 469920  | 128160  | 0 | 1  | 0 | 0 | 50 | 68 | 25149620 | 2.62E-01 | 1 |
| LTC4S    | 1610057 | 359 | 38  | 370240  | 132788  | 0 | 1  | 0 | 0 | 50 | 48 | 18056676 | 2.62E-01 | 1 |
| RAP1GDS1 | 116633  | 909 | 6   | 1594880 | 416164  | 0 | 7  | 1 | 0 | 50 | 51 | 18446140 | 2.62E-01 | 1 |
| CRYM     | 467861  | 575 | 37  | 804916  | 238520  | 0 | 4  | 1 | 0 | 50 | 59 | 19353584 | 2.63E-01 | 1 |
| CAMK4    | 192731  | 767 | 29  | 1224640 | 338912  | 0 | 6  | 2 | 0 | 10 | 16 | 4991476  | 2.63E-01 | 1 |
| MYL12A   | 551966  | 328 | 55  | 459596  | 104308  | 0 | 2  | 1 | 0 | 15 | 18 | 5606288  | 2.63E-01 | 1 |
| LRRC36   | 1158788 | 125 | 49  | 1949456 | 555004  | 0 | 10 | 0 | 0 | 1  | 0  | 808832   | 2.63E-01 | 1 |
| TCHH     | 527465  | 349 | 35  | 4997884 | 1234964 | 0 | 32 | 7 | 0 | 15 | 17 | 5681048  | 2.63E-01 | 1 |
| SPRR2A   | 687290  | 704 | 30  | 187968  | 50196   | 0 | 1  | 0 | 0 | 50 | 34 | 21429064 | 2.63E-01 | 1 |
| SPRR2D   | 687290  | 704 | 30  | 187968  | 50196   | 0 | 1  | 0 | 0 | 50 | 34 | 21429064 | 2.63E-01 | 1 |
| SPRR2F   | 687290  | 704 | 30  | 187968  | 50196   | 0 | 1  | 0 | 0 | 50 | 34 | 21429064 | 2.63E-01 | 1 |
| ICMT     | 627248  | 240 | 31  | 709508  | 222856  | 0 | 4  | 0 | 0 | 50 | 61 | 18409472 | 2.63E-01 | 1 |
| CD2AP    | 203824  | 554 | 16  | 1680676 | 442508  | 0 | 9  | 1 | 0 | 50 | 53 | 21021800 | 2.63E-01 | 1 |
| KCNC4    | 532510  | 400 | 38  | 1715564 | 548596  | 0 | 10 | 3 | 0 | 50 | 73 | 20847360 | 2.63E-01 | 1 |
| NID1     | 555035  | 318 | 19  | 3159856 | 922040  | 0 | 12 | 4 | 0 | 50 | 45 | 23701768 | 2.63E-01 | 1 |
| CDH7     | 4645    | 524 | -49 | 2004636 | 558564  | 0 | 11 | 1 | 0 | 3  | 2  | 1550024  | 2.63E-01 | 1 |
| RNF7     | 406166  | 406 | 29  | 323604  | 50196   | 0 | 2  | 0 | 0 | 8  | 12 | 2883600  | 2.64E-01 | 1 |
| HOXA3    | 356045  | 385 | 28  | 1075120 | 351728  | 0 | 3  | 0 | 0 | 50 | 46 | 22711376 | 2.64E-01 | 1 |
| RBM23    | 1177534 | 225 | 34  | 1138132 | 327164  | 0 | 5  | 0 | 0 | 50 | 44 | 16175572 | 2.64E-01 | 1 |
| SIGLEC6  | 328446  | 627 | -26 | 1178360 | 341404  | 0 | 5  | 2 | 0 | 50 | 89 | 22063100 | 2.64E-01 | 1 |
| CLEC10A  | 1696302 | 360 | 24  | 844432  | 215024  | 0 | 2  | 1 | 0 | 50 | 49 | 16256384 | 2.64E-01 | 1 |
| RPL22    | 627248  | 240 | 31  | 347812  | 80456   | 0 | 1  | 0 | 0 | 50 | 61 | 18409472 | 2.64E-01 | 1 |
| ZNF225   | 554986  | 634 | -28 | 1847640 | 434676  | 0 | 7  | 0 | 0 | 50 | 52 | 17611320 | 2.65E-01 | 1 |
| NUDT14   | 872033  | 260 | 25  | 555004  | 178712  | 0 | 2  | 0 | 0 | 50 | 67 | 20410192 | 2.65E-01 | 1 |
| AKR1D1   | 220333  | 478 | 16  | 862232  | 221788  | 0 | 6  | 0 | 0 | 50 | 54 | 18168460 | 2.65E-01 | 1 |
| LRRC28   | 272870  | 380 | -1  | 945892  | 271628  | 0 | 3  | 1 | 0 | 50 | 49 | 25107968 | 2.65E-01 | 1 |
| ARHGEF7  | 405184  | 579 | 30  | 2331800 | 632968  | 0 | 8  | 1 | 0 | 25 | 16 | 11146360 | 2.65E-01 | 1 |
| MTBP     | 193807  | 877 | -3  | 2387336 | 606268  | 0 | 8  | 2 | 0 | 50 | 48 | 18343968 | 2.65E-01 | 1 |
| EIF2B5   | 1453689 | 334 | 42  | 1861524 | 515844  | 0 | 10 | 1 | 0 | 10 | 20 | 5986140  | 2.65E-01 | 1 |
| STMN3    | 1094905 | 193 | 54  | 473480  | 125668  | 0 | 2  | 0 | 0 | 50 | 79 | 24540860 | 2.66E-01 | 1 |
| ONECUT1  | 294072  | 514 | 18  | 1151304 | 346032  | 0 | 4  | 0 | 0 | 50 | 46 | 21168472 | 2.66E-01 | 1 |

|           |         |     |     |         |         |   |    |   |   |    |    |          |          |   |
|-----------|---------|-----|-----|---------|---------|---|----|---|---|----|----|----------|----------|---|
| RAB11FIP2 | 501371  | 307 | 30  | 1650772 | 453188  | 0 | 6  | 1 | 0 | 50 | 60 | 20966264 | 2.66E-01 | 1 |
| CTF1      | 1508459 | 247 | 46  | 475616  | 182272  | 0 | 2  | 0 | 0 | 50 | 71 | 20582852 | 2.66E-01 | 1 |
| BOLA3     | 1023516 | 250 | 38  | 361696  | 75116   | 0 | 3  | 0 | 0 | 50 | 63 | 19889720 | 2.66E-01 | 1 |
| SETX      | 888858  | 429 | 36  | 6867240 | 1815600 | 0 | 21 | 1 | 0 | 1  | 1  | 2003924  | 2.66E-01 | 1 |
| TIGD4     | 209186  | 413 | 41  | 1286228 | 357424  | 0 | 6  | 1 | 0 | 50 | 66 | 22524120 | 2.67E-01 | 1 |
| NCOA3     | 266824  | 287 | 49  | 3714148 | 973304  | 0 | 10 | 1 | 0 | 9  | 6  | 4190120  | 2.67E-01 | 1 |
| PRKRIR    | 234429  | 366 | 57  | 1943760 | 514776  | 0 | 8  | 3 | 0 | 50 | 58 | 20234684 | 2.67E-01 | 1 |
| ACMSD     | 275440  | 496 | 15  | 894984  | 225348  | 0 | 2  | 1 | 0 | 50 | 52 | 18304096 | 2.67E-01 | 1 |
| C12orf71  | 489310  | 328 | 23  | 681740  | 189748  | 0 | 4  | 1 | 0 | 50 | 47 | 19871564 | 2.67E-01 | 1 |
| MTDH      | 605177  | 163 | 38  | 1494488 | 420436  | 0 | 6  | 0 | 0 | 50 | 52 | 21745904 | 2.67E-01 | 1 |
| PRM1      | 632841  | 308 | 37  | 138484  | 34532   | 0 | 1  | 0 | 0 | 19 | 22 | 7369912  | 2.68E-01 | 1 |
| ITGB3     | 965617  | 188 | 19  | 2036320 | 553580  | 0 | 9  | 0 | 0 | 6  | 3  | 2795668  | 2.68E-01 | 1 |
| LY6H      | 1104860 | 446 | 20  | 411892  | 124244  | 0 | 1  | 1 | 0 | 21 | 20 | 8005728  | 2.68E-01 | 1 |
| CCL16     | 779228  | 525 | 19  | 308296  | 90068   | 0 | 1  | 0 | 0 | 50 | 69 | 21358220 | 2.68E-01 | 1 |
| ROPN1     | 244828  | 450 | 24  | 543612  | 155928  | 0 | 2  | 1 | 0 | 44 | 47 | 15727368 | 2.68E-01 | 1 |
| LRFN2     | 100435  | 887 | 20  | 1903176 | 636528  | 0 | 6  | 3 | 0 | 22 | 25 | 10950560 | 2.68E-01 | 1 |
| ZNF514    | 223452  | 616 | 24  | 1040232 | 257388  | 0 | 4  | 1 | 0 | 48 | 53 | 21341844 | 2.68E-01 | 1 |
| DCTN4     | 1015949 | 211 | 43  | 1232828 | 324316  | 0 | 5  | 1 | 0 | 50 | 65 | 23620956 | 2.68E-01 | 1 |
| ZNF215    | 403341  | 827 | 6   | 1351020 | 325740  | 0 | 5  | 0 | 0 | 50 | 71 | 21769756 | 2.68E-01 | 1 |
| CAPG      | 1067736 | 180 | 39  | 902104  | 254540  | 0 | 2  | 0 | 0 | 50 | 68 | 23641960 | 2.68E-01 | 1 |
| HLA-DQB1  | 1292851 | 535 | 17  | 666076  | 192596  | 0 | 3  | 1 | 0 | 50 | 68 | 20377084 | 2.68E-01 | 1 |
| APOA4     | 419339  | 326 | 36  | 994664  | 285868  | 0 | 4  | 2 | 0 | 6  | 4  | 2394100  | 2.69E-01 | 1 |
| FHOD1     | 1109491 | 150 | 46  | 2881464 | 940908  | 0 | 6  | 0 | 0 | 5  | 1  | 3011048  | 2.69E-01 | 1 |
| CRYGB     | 321897  | 440 | 5   | 462800  | 113920  | 0 | 3  | 0 | 0 | 50 | 50 | 16889352 | 2.69E-01 | 1 |
| KDM4D     | 304973  | 513 | -12 | 1294772 | 384124  | 0 | 3  | 1 | 0 | 46 | 53 | 20091572 | 2.69E-01 | 1 |
| TNP2      | 632841  | 308 | 37  | 363120  | 88644   | 0 | 2  | 0 | 0 | 50 | 60 | 21937788 | 2.69E-01 | 1 |
| HLA-B     | 2552688 | 347 | 28  | 924532  | 270560  | 0 | 3  | 1 | 0 | 49 | 61 | 27729196 | 2.69E-01 | 1 |
| EMP3      | 1478750 | 217 | 36  | 423640  | 121040  | 0 | 1  | 1 | 0 | 50 | 89 | 31278516 | 2.70E-01 | 1 |
| DDX10     | 250455  | 616 | 2   | 2313644 | 567820  | 0 | 8  | 1 | 0 | 24 | 23 | 11628028 | 2.70E-01 | 1 |
| HMX2      | 213809  | 769 | 0   | 668212  | 213956  | 0 | 3  | 0 | 0 | 50 | 40 | 19819588 | 2.70E-01 | 1 |
| IFIH1     | 70837   | 712 | 12  | 2680680 | 670704  | 0 | 8  | 1 | 0 | 50 | 68 | 24183436 | 2.70E-01 | 1 |
| GNPNAT1   | 307859  | 213 | 26  | 487008  | 127092  | 0 | 2  | 1 | 0 | 13 | 13 | 4673212  | 2.70E-01 | 1 |
| SAA2      | 601955  | 371 | 17  | 340336  | 92204   | 0 | 2  | 0 | 0 | 50 | 58 | 21345760 | 2.70E-01 | 1 |



|          |         |      |     |         |        |   |    |   |   |    |     |          |          |   |
|----------|---------|------|-----|---------|--------|---|----|---|---|----|-----|----------|----------|---|
| UBE3C    | 389401  | 334  | 9   | 2808484 | 758636 | 0 | 9  | 2 | 0 | 50 | 55  | 24152820 | 2.70E-01 | 1 |
| SPATS2   | 2172889 | 217  | 43  | 1419372 | 377004 | 0 | 6  | 0 | 0 | 50 | 59  | 22776524 | 2.70E-01 | 1 |
| RFESD    | 307041  | 359  | 32  | 550020  | 143112 | 0 | 1  | 0 | 0 | 50 | 41  | 18933504 | 2.70E-01 | 1 |
| COX10    | 96214   | 985  | -54 | 1104668 | 343540 | 0 | 5  | 0 | 0 | 45 | 44  | 17054536 | 2.71E-01 | 1 |
| THY1     | 1054477 | 263  | 40  | 406908  | 124956 | 0 | 3  | 0 | 0 | 50 | 80  | 23473572 | 2.71E-01 | 1 |
| RNF168   | 1173736 | 125  | 34  | 1472416 | 383768 | 0 | 8  | 2 | 0 | 13 | 20  | 5821668  | 2.71E-01 | 1 |
| NAB1     | 504177  | 232  | 37  | 1254900 | 338556 | 0 | 4  | 0 | 0 | 50 | 47  | 19300184 | 2.71E-01 | 1 |
| CD63     | 1814311 | 384  | 26  | 623712  | 171948 | 0 | 2  | 0 | 0 | 50 | 44  | 15945952 | 2.71E-01 | 1 |
| RPUSD4   | 601483  | 341  | 26  | 961556  | 279460 | 0 | 4  | 0 | 0 | 27 | 19  | 10030300 | 2.71E-01 | 1 |
| HAND1    | 581156  | 416  | 29  | 531864  | 164472 | 0 | 3  | 0 | 0 | 50 | 52  | 20192320 | 2.71E-01 | 1 |
| MAEL     | 264649  | 681  | -11 | 1150236 | 292632 | 0 | 4  | 1 | 0 | 50 | 57  | 22892936 | 2.72E-01 | 1 |
| AKR1C3   | 438967  | 678  | -14 | 850128  | 224280 | 0 | 3  | 0 | 0 | 50 | 44  | 16064144 | 2.72E-01 | 1 |
| GTF2A2   | 521844  | 172  | 33  | 293700  | 75828  | 0 | 1  | 0 | 0 | 50 | 69  | 21237180 | 2.72E-01 | 1 |
| ECM1     | 1532790 | 163  | 43  | 1380212 | 391600 | 0 | 7  | 2 | 0 | 50 | 76  | 23299844 | 2.72E-01 | 1 |
| PLP2     | 724395  | NaN  | 44  | 388040  | 119260 | 0 | 2  | 1 | 0 | 42 | 35  | 15951292 | 2.72E-01 | 1 |
| SERPINH1 | 546732  | 227  | 41  | 1046640 | 312924 | 0 | 5  | 0 | 0 | 4  | 0   | 1279464  | 2.72E-01 | 1 |
| TBC1D20  | 726170  | 229  | 41  | 1028840 | 295480 | 0 | 5  | 1 | 0 | 8  | 8   | 2654692  | 2.73E-01 | 1 |
| ITPA     | 997984  | 255  | 52  | 516556  | 138128 | 0 | 2  | 1 | 0 | 50 | 56  | 18980852 | 2.73E-01 | 1 |
| ABCG4    | 1258103 | 195  | 57  | 1644720 | 488076 | 0 | 6  | 1 | 0 | 46 | 54  | 22055268 | 2.73E-01 | 1 |
| CDH12    | 127633  | 1075 | -20 | 2024216 | 565684 | 0 | 11 | 1 | 0 | 41 | 48  | 17551512 | 2.73E-01 | 1 |
| FBXO48   | 212087  | 617  | 30  | 409400  | 98968  | 0 | 3  | 0 | 0 | 50 | 58  | 17461088 | 2.73E-01 | 1 |
| SMC4     | 435184  | 513  | 16  | 3403716 | 824496 | 0 | 17 | 0 | 0 | 0  | 0   | 824496   | 2.73E-01 | 1 |
| ATP5G3   | 343228  | 752  | 28  | 363120  | 114276 | 0 | 1  | 0 | 0 | 50 | 62  | 22706392 | 2.73E-01 | 1 |
| NODAL    | 550900  | 338  | 42  | 867216  | 258456 | 0 | 4  | 1 | 0 | 50 | 41  | 18662588 | 2.73E-01 | 1 |
| GGTLC2   | 179695  | 641  | 22  | 556784  | 164116 | 0 | 3  | 1 | 0 | 50 | 49  | 20114000 | 2.74E-01 | 1 |
| RHOU     | 689585  | 450  | 9   | 647208  | 191172 | 0 | 4  | 1 | 0 | 50 | 48  | 17201920 | 2.74E-01 | 1 |
| CLIC1    | 2513551 | 176  | 26  | 619796  | 176932 | 0 | 3  | 0 | 0 | 50 | 57  | 25759092 | 2.74E-01 | 1 |
| HRASLS5  | 887496  | 459  | 31  | 731224  | 187256 | 0 | 5  | 1 | 0 | 50 | 61  | 22549396 | 2.74E-01 | 1 |
| TMCC2    | 690215  | 169  | 34  | 1743688 | 548240 | 0 | 6  | 1 | 0 | 50 | 56  | 21454696 | 2.74E-01 | 1 |
| RPS17    | NaN     | NaN  | NaN | 719832  | 194376 | 0 | 4  | 0 | 0 | 50 | 116 | 39839960 | 2.74E-01 | 1 |
| FBXL7    | 13845   | 956  | -27 | 1210044 | 379140 | 0 | 9  | 2 | 0 | 50 | 91  | 23858764 | 2.74E-01 | 1 |
| CYTH2    | 1418188 | 209  | 41  | 1054828 | 276968 | 0 | 5  | 0 | 0 | 50 | 91  | 32574000 | 2.74E-01 | 1 |
| RNASE3   | 1070609 | 561  | 16  | 399076  | 121040 | 0 | 3  | 1 | 0 | 50 | 62  | 17665076 | 2.74E-01 | 1 |

|           |         |      |     |          |         |   |    |   |   |    |    |          |          |   |
|-----------|---------|------|-----|----------|---------|---|----|---|---|----|----|----------|----------|---|
| IL1F10    | 672307  | 479  | 25  | 399076   | 108224  | 0 | 3  | 1 | 0 | 33 | 39 | 12373492 | 2.74E-01 | 1 |
| TRPM7     | 325708  | 250  | 23  | 4902120  | 1238880 | 0 | 12 | 2 | 0 | 20 | 14 | 10696020 | 2.74E-01 | 1 |
| IGFL4     | 997099  | 261  | 31  | 331080   | 84372   | 0 | 2  | 0 | 0 | 50 | 59 | 22367124 | 2.74E-01 | 1 |
| BCAS3     | 211130  | 576  | -11 | 2405492  | 673552  | 0 | 8  | 2 | 0 | 48 | 52 | 19186976 | 2.74E-01 | 1 |
| TSG101    | 623656  | 341  | 20  | 1014956  | 276256  | 0 | 3  | 1 | 0 | 50 | 51 | 24734880 | 2.74E-01 | 1 |
| PIIB      | 743794  | 251  | 43  | 555716   | 156640  | 0 | 3  | 1 | 0 | 50 | 57 | 23116860 | 2.75E-01 | 1 |
| ARRDC1    | 1197708 | 478  | 45  | 1077256  | 345320  | 0 | 3  | 1 | 0 | 45 | 76 | 25224024 | 2.75E-01 | 1 |
| LCE1C     | 64902   | 818  | 18  | 300820   | 84728   | 0 | 2  | 1 | 0 | 13 | 28 | 5373820  | 2.75E-01 | 1 |
| SLC18A3   | 118787  | 312  | 32  | 1248848  | 458884  | 0 | 4  | 4 | 0 | 21 | 24 | 8163792  | 2.75E-01 | 1 |
| KIAA1614  | 232445  | 398  | 15  | 2882888  | 969388  | 0 | 8  | 1 | 0 | 7  | 5  | 3997524  | 2.75E-01 | 1 |
| FIGN      | 20376   | 586  | -11 | 1870068  | 569244  | 0 | 8  | 3 | 0 | 50 | 73 | 23692512 | 2.75E-01 | 1 |
| ATP2B1    | 235578  | 418  | 9   | 3271284  | 890712  | 0 | 9  | 2 | 0 | 47 | 41 | 21802864 | 2.75E-01 | 1 |
| SEC11C    | 280782  | 512  | 53  | 506944   | 134924  | 0 | 3  | 0 | 0 | 50 | 54 | 16867280 | 2.75E-01 | 1 |
| AKAP9     | 674222  | 611  | 16  | 10258140 | 2472420 | 0 | 47 | 8 | 0 | 5  | 10 | 4494500  | 2.75E-01 | 1 |
| SERPIN1   | 190401  | 339  | 20  | 1025992  | 259880  | 0 | 5  | 1 | 0 | 50 | 49 | 19965548 | 2.75E-01 | 1 |
| DOK2      | 402326  | 470  | 12  | 1018160  | 324316  | 0 | 3  | 0 | 0 | 43 | 47 | 20968756 | 2.75E-01 | 1 |
| RLF       | 698659  | 303  | 25  | 4913512  | 1254188 | 0 | 17 | 1 | 0 | 15 | 25 | 11031372 | 2.76E-01 | 1 |
| IRX1      | 7226    | 1155 | -24 | 1166256  | 389820  | 0 | 11 | 2 | 0 | 3  | 4  | 1202212  | 2.76E-01 | 1 |
| TMEM144   | 135911  | 684  | -9  | 915988   | 239588  | 0 | 3  | 0 | 0 | 50 | 71 | 30278156 | 2.76E-01 | 1 |
| SAA1      | 601955  | 371  | 17  | 321824   | 85084   | 0 | 2  | 0 | 0 | 50 | 58 | 21345760 | 2.76E-01 | 1 |
| THTPA     | 1250373 | 553  | 35  | 568176   | 180492  | 0 | 2  | 0 | 0 | 50 | 82 | 25432996 | 2.76E-01 | 1 |
| OR4S2     | 1295    | 1091 | -20 | 778216   | 221432  | 0 | 5  | 2 | 0 | 38 | 56 | 13911412 | 2.76E-01 | 1 |
| SLC9A1    | 886940  | 336  | 27  | 2034896  | 626560  | 0 | 6  | 1 | 0 | 37 | 39 | 15330072 | 2.76E-01 | 1 |
| KLRB1     | 264317  | 618  | 7   | 597012   | 149520  | 0 | 3  | 0 | 0 | 50 | 51 | 22308028 | 2.76E-01 | 1 |
| MAK       | 263773  | 468  | 14  | 1632260  | 418300  | 0 | 4  | 1 | 0 | 50 | 41 | 17401280 | 2.77E-01 | 1 |
| KCNA5     | 160467  | 896  | 22  | 1474908  | 492348  | 0 | 7  | 2 | 0 | 50 | 47 | 23319780 | 2.77E-01 | 1 |
| FAM71A    | 409070  | 224  | 26  | 1457820  | 448560  | 0 | 9  | 4 | 0 | 20 | 26 | 7435060  | 2.77E-01 | 1 |
| MLLT3     | 85091   | 575  | 14  | 1510508  | 355288  | 0 | 6  | 1 | 0 | 50 | 61 | 22513440 | 2.77E-01 | 1 |
| RBM7      | 157610  | 477  | -8  | 699896   | 174796  | 0 | 4  | 0 | 0 | 50 | 63 | 23313372 | 2.77E-01 | 1 |
| HIST1H2AC | 227588  | 622  | 29  | 313636   | 110360  | 0 | 7  | 2 | 0 | 8  | 16 | 1721260  | 2.77E-01 | 1 |
| FILIP1    | 441614  | 325  | 19  | 3068364  | 842652  | 0 | 17 | 4 | 0 | 8  | 7  | 3311868  | 2.77E-01 | 1 |
| NCOR2     | 1239461 | 472  | 37  | 6345344  | 1934860 | 0 | 17 | 1 | 0 | 0  | 1  | 1934860  | 2.77E-01 | 1 |
| CNNM1     | 270704  | 575  | -6  | 2331444  | 761484  | 0 | 6  | 0 | 0 | 10 | 7  | 4751532  | 2.77E-01 | 1 |

|         |         |      |     |         |        |   |    |   |   |    |     |          |          |   |
|---------|---------|------|-----|---------|--------|---|----|---|---|----|-----|----------|----------|---|
| STXBP5L | 319082  | 785  | -8  | 3095420 | 823072 | 0 | 12 | 1 | 0 | 32 | 32  | 16536912 | 2.77E-01 | 1 |
| IRF2    | 207866  | 400  | 55  | 920616  | 234960 | 0 | 5  | 1 | 0 | 50 | 53  | 20572884 | 2.77E-01 | 1 |
| REEP4   | 584373  | 219  | 34  | 661804  | 194732 | 0 | 2  | 0 | 0 | 50 | 59  | 21330096 | 2.78E-01 | 1 |
| ZNF546  | 1181917 | 521  | 22  | 2173380 | 529728 | 0 | 11 | 1 | 0 | 50 | 77  | 22919280 | 2.78E-01 | 1 |
| PAGE4   | 257202  | NaN  | 7   | 276968  | 70132  | 0 | 2  | 0 | 0 | 50 | 64  | 19684664 | 2.78E-01 | 1 |
| ZNF781  | 484296  | 888  | -51 | 833396  | 217516 | 0 | 8  | 2 | 0 | 50 | 72  | 17622000 | 2.78E-01 | 1 |
| MACC1   | 220237  | 676  | 13  | 2165904 | 584196 | 0 | 10 | 3 | 0 | 49 | 66  | 18401996 | 2.78E-01 | 1 |
| ZNF544  | 1471648 | 581  | -53 | 1841944 | 469208 | 0 | 10 | 0 | 0 | 3  | 3   | 1713072  | 2.78E-01 | 1 |
| PPP3CB  | 966152  | 220  | 40  | 1383060 | 357780 | 0 | 6  | 0 | 0 | 50 | 62  | 23185924 | 2.78E-01 | 1 |
| CXXC1   | 247194  | 379  | 68  | 1710224 | 467428 | 0 | 8  | 1 | 0 | 50 | 64  | 21669720 | 2.78E-01 | 1 |
| MAP3K5  | 329812  | 448  | 31  | 3581004 | 948384 | 0 | 13 | 4 | 0 | 50 | 47  | 21842736 | 2.78E-01 | 1 |
| PCBP1   | 686152  | 156  | 52  | 870064  | 273764 | 0 | 7  | 2 | 0 | 49 | 59  | 15290200 | 2.78E-01 | 1 |
| FBXO34  | 744260  | 256  | 38  | 1789256 | 496264 | 0 | 11 | 2 | 0 | 50 | 67  | 23760508 | 2.79E-01 | 1 |
| OR10J5  | 492825  | 646  | -4  | 760772  | 230332 | 0 | 6  | 0 | 0 | 50 | 73  | 21442592 | 2.79E-01 | 1 |
| SNRPE   | 527029  | 280  | 26  | 259524  | 57672  | 0 | 2  | 0 | 0 | 50 | 51  | 15071260 | 2.79E-01 | 1 |
| RTAP12L | 874480  | 461  | 25  | 279104  | 87220  | 0 | 2  | 1 | 0 | 10 | 14  | 5109668  | 2.79E-01 | 1 |
| AGPAT2  | 1918290 | 190  | 56  | 698472  | 218940 | 0 | 2  | 0 | 0 | 50 | 46  | 19629484 | 2.79E-01 | 1 |
| GPR158  | 43942   | 814  | -21 | 3056616 | 884304 | 0 | 15 | 3 | 0 | 7  | 10  | 3603788  | 2.79E-01 | 1 |
| BCL2L15 | 335231  | 545  | 13  | 424708  | 113564 | 0 | 1  | 0 | 0 | 50 | 60  | 19779004 | 2.79E-01 | 1 |
| RPS3A   | 214920  | 335  | 26  | 700608  | 174084 | 0 | 2  | 0 | 0 | 50 | 51  | 18916060 | 2.79E-01 | 1 |
| RASA2   | 405454  | 259  | 28  | 2262380 | 561412 | 0 | 8  | 1 | 0 | 41 | 57  | 22794324 | 2.79E-01 | 1 |
| MFSB9   | 70590   | 913  | -3  | 1163764 | 381632 | 0 | 4  | 2 | 0 | 50 | 67  | 19587476 | 2.80E-01 | 1 |
| GTF2E1  | 307733  | 475  | 11  | 1123892 | 302956 | 0 | 6  | 1 | 0 | 50 | 50  | 20964128 | 2.80E-01 | 1 |
| RFX3    | 159455  | 1028 | 3   | 2071208 | 564616 | 0 | 7  | 1 | 0 | 8  | 8   | 4106460  | 2.80E-01 | 1 |
| PSMA6   | 452722  | 188  | 40  | 648632  | 168388 | 0 | 5  | 0 | 0 | 50 | 63  | 17921040 | 2.80E-01 | 1 |
| LAMP3   | 296133  | 596  | 24  | 1035248 | 322180 | 0 | 3  | 1 | 0 | 50 | 61  | 27744860 | 2.80E-01 | 1 |
| CLUAP1  | 805495  | 246  | 39  | 1110364 | 263084 | 0 | 3  | 0 | 0 | 21 | 14  | 7587428  | 2.80E-01 | 1 |
| PKP2    | 292831  | 381  | -18 | 2233544 | 647920 | 0 | 10 | 0 | 0 | 7  | 5   | 2854408  | 2.80E-01 | 1 |
| DCD1L   | 307589  | 556  | 37  | 708796  | 194732 | 0 | 3  | 0 | 0 | 50 | 33  | 17868352 | 2.80E-01 | 1 |
| FOXJ3   | 541904  | 579  | 23  | 1628344 | 419012 | 0 | 5  | 0 | 0 | 22 | 14  | 8447880  | 2.81E-01 | 1 |
| TFRC    | 959125  | 170  | 52  | 1984344 | 530796 | 0 | 9  | 2 | 0 | 50 | 73  | 20954160 | 2.81E-01 | 1 |
| QPRT    | NaN     | NaN  | NaN | 720544  | 249200 | 0 | 4  | 0 | 0 | 50 | 116 | 39894784 | 2.81E-01 | 1 |
| IFNE    | 242654  | 411  | -6  | 530796  | 138840 | 0 | 2  | 1 | 0 | 50 | 34  | 19573236 | 2.81E-01 | 1 |

|          |         |      |     |         |         |   |    |   |   |    |     |          |          |   |
|----------|---------|------|-----|---------|---------|---|----|---|---|----|-----|----------|----------|---|
| GPR151   | 377370  | 463  | 14  | 1038096 | 307584  | 0 | 5  | 0 | 0 | 48 | 40  | 17922108 | 2.81E-01 | 1 |
| PDCD5    | 358893  | 455  | -32 | 347100  | 80100   | 0 | 3  | 1 | 0 | 11 | 11  | 3467440  | 2.81E-01 | 1 |
| CENPH    | 422005  | 232  | 38  | 681384  | 149520  | 0 | 3  | 0 | 0 | 50 | 37  | 19057036 | 2.81E-01 | 1 |
| C6orf195 | 467575  | 342  | 25  | 315060  | 95052   | 0 | 3  | 1 | 0 | 12 | 13  | 3536148  | 2.81E-01 | 1 |
| PIKFYVE  | 256462  | 539  | 10  | 5479908 | 1430052 | 0 | 17 | 3 | 0 | 29 | 24  | 13897528 | 2.81E-01 | 1 |
| SNRPN    | NaN     | NaN  | NaN | 598792  | 199004  | 0 | 3  | 0 | 0 | 50 | 116 | 39844588 | 2.82E-01 | 1 |
| NFRSF13C | 1335011 | 323  | 67  | 433608  | 169812  | 0 | 3  | 0 | 0 | 50 | 49  | 15999352 | 2.82E-01 | 1 |
| GDF3     | 237142  | 672  | 14  | 911004  | 267000  | 0 | 4  | 1 | 0 | 50 | 67  | 22681828 | 2.82E-01 | 1 |
| OR2B11   | 272980  | 927  | -14 | 768604  | 249200  | 0 | 4  | 0 | 0 | 50 | 59  | 17172372 | 2.82E-01 | 1 |
| CDKN2B   | 192919  | 212  | -21 | 392312  | 145960  | 0 | 2  | 0 | 0 | 50 | 57  | 20206204 | 2.82E-01 | 1 |
| FAM189B  | 1574928 | 194  | 45  | 1625140 | 565328  | 0 | 7  | 0 | 0 | 29 | 25  | 9535460  | 2.82E-01 | 1 |
| WFDC3    | 742720  | 180  | 48  | 609116  | 159844  | 0 | 4  | 0 | 0 | 50 | 49  | 15404476 | 2.82E-01 | 1 |
| GBA3     | 103435  | 746  | 22  | 1211824 | 313280  | 0 | 5  | 2 | 0 | 21 | 22  | 8754396  | 2.82E-01 | 1 |
| ATG7     | 184628  | 425  | 30  | 1834824 | 497688  | 0 | 4  | 2 | 0 | 50 | 59  | 25932108 | 2.83E-01 | 1 |
| NXF3     | 456169  | NaN  | 16  | 1445004 | 342828  | 0 | 6  | 2 | 0 | 50 | 53  | 18791104 | 2.83E-01 | 1 |
| LIMD1    | 340032  | 231  | 45  | 1686728 | 514420  | 0 | 4  | 0 | 0 | 9  | 3   | 4035972  | 2.83E-01 | 1 |
| ZNF439   | 739660  | 633  | -2  | 1299044 | 311500  | 0 | 7  | 0 | 0 | 25 | 19  | 8588500  | 2.83E-01 | 1 |
| ATAD3B   | 1714469 | 248  | 27  | 1651128 | 494484  | 0 | 6  | 1 | 0 | 6  | 7   | 3193676  | 2.83E-01 | 1 |
| ASAP1    | 264818  | 427  | 30  | 2938424 | 803848  | 0 | 9  | 3 | 0 | 50 | 61  | 26467532 | 2.83E-01 | 1 |
| TSEN2    | 352597  | 317  | 36  | 1254900 | 324672  | 0 | 6  | 1 | 0 | 50 | 46  | 20198016 | 2.83E-01 | 1 |
| CCDC83   | 361760  | 380  | 3   | 1200076 | 272696  | 0 | 3  | 0 | 0 | 50 | 54  | 19738776 | 2.83E-01 | 1 |
| MYO1A    | 2026922 | 199  | 41  | 2718416 | 741904  | 0 | 16 | 2 | 0 | 50 | 67  | 21271000 | 2.83E-01 | 1 |
| TUBB2B   | 451139  | 453  | 37  | 1130300 | 311500  | 0 | 6  | 2 | 0 | 50 | 57  | 17322960 | 2.83E-01 | 1 |
| LHX3     | 799089  | 244  | 42  | 1066220 | 334996  | 0 | 4  | 1 | 0 | 30 | 38  | 15176636 | 2.83E-01 | 1 |
| DCDC1    | 84163   | 938  | -25 | 920972  | 246352  | 0 | 13 | 3 | 0 | 8  | 18  | 2942340  | 2.83E-01 | 1 |
| PPP1R3B  | 159748  | 526  | 23  | 731580  | 189036  | 0 | 3  | 0 | 0 | 50 | 42  | 20661884 | 2.83E-01 | 1 |
| GRIA1    | 67092   | 914  | -3  | 2441448 | 655752  | 0 | 13 | 5 | 0 | 50 | 68  | 19361060 | 2.83E-01 | 1 |
| POLE3    | 390186  | 297  | 36  | 393380  | 93628   | 0 | 2  | 0 | 0 | 50 | 42  | 19391676 | 2.84E-01 | 1 |
| PARP8    | 76181   | 1215 | 14  | 2258820 | 591672  | 0 | 11 | 4 | 0 | 17 | 20  | 6479912  | 2.84E-01 | 1 |
| AHSA1    | 504548  | 359  | 47  | 889644  | 230688  | 0 | 4  | 0 | 0 | 33 | 43  | 14040284 | 2.84E-01 | 1 |
| BAK1     | 1252332 | 205  | 35  | 539340  | 161268  | 0 | 2  | 0 | 0 | 50 | 58  | 16890776 | 2.84E-01 | 1 |
| FBXO28   | 638932  | 174  | 13  | 936636  | 264864  | 0 | 5  | 1 | 0 | 50 | 52  | 21216888 | 2.84E-01 | 1 |
| PAPSS1   | 144822  | 679  | 4   | 1617664 | 433964  | 0 | 6  | 2 | 0 | 50 | 47  | 20551524 | 2.84E-01 | 1 |

|          |         |     |     |         |        |   |    |   |   |    |     |          |          |   |
|----------|---------|-----|-----|---------|--------|---|----|---|---|----|-----|----------|----------|---|
| LMNB2    | 1604277 | 267 | 35  | 1524392 | 450340 | 0 | 6  | 0 | 0 | 12 | 10  | 4611268  | 2.85E-01 | 1 |
| BNIP3    | 123624  | 470 | -21 | 513708  | 132432 | 0 | 2  | 0 | 0 | 50 | 80  | 22720632 | 2.85E-01 | 1 |
| SLC29A1  | 1107034 | 216 | 51  | 1170172 | 348524 | 0 | 6  | 2 | 0 | 50 | 69  | 20304104 | 2.85E-01 | 1 |
| PCMTD1   | 63777   | 905 | 2   | 939128  | 229264 | 0 | 3  | 1 | 0 | 50 | 34  | 16651900 | 2.85E-01 | 1 |
| NME4     | 1549307 | 207 | 37  | 475616  | 145960 | 0 | 1  | 0 | 0 | 36 | 55  | 20238956 | 2.85E-01 | 1 |
| ACVRL1   | 493265  | 371 | 27  | 1276260 | 377004 | 0 | 5  | 1 | 0 | 7  | 4   | 2520480  | 2.85E-01 | 1 |
| PHOX2B   | 308280  | 376 | 22  | 766824  | 250980 | 0 | 1  | 1 | 0 | 50 | 37  | 23283112 | 2.85E-01 | 1 |
| WDR17    | 133039  | 616 | -8  | 3456404 | 910648 | 0 | 17 | 0 | 0 | 0  | 0   | 910648   | 2.85E-01 | 1 |
| NKX6-3   | 434010  | 533 | 37  | 333216  | 108936 | 0 | 2  | 0 | 0 | 50 | 50  | 18020364 | 2.85E-01 | 1 |
| CCDC77   | 409007  | 372 | 27  | 1294416 | 319332 | 0 | 5  | 0 | 0 | 50 | 36  | 19883668 | 2.85E-01 | 1 |
| RPL21    | 284055  | 265 | 46  | 431472  | 107868 | 0 | 1  | 0 | 0 | 50 | 59  | 21531948 | 2.86E-01 | 1 |
| LOXL4    | 225311  | 581 | 9   | 1936996 | 548240 | 0 | 4  | 0 | 0 | 50 | 44  | 22323692 | 2.86E-01 | 1 |
| IRF3     | 1733181 | 195 | 36  | 1076188 | 327164 | 0 | 5  | 1 | 0 | 9  | 8   | 4296208  | 2.86E-01 | 1 |
| SLC22A12 | 1970283 | 411 | 54  | 1363836 | 453900 | 0 | 9  | 2 | 0 | 50 | 67  | 19338632 | 2.86E-01 | 1 |
| HIST1H3E | 390169  | 544 | 57  | 331080  | 110004 | 0 | 3  | 0 | 0 | 50 | 61  | 13862640 | 2.86E-01 | 1 |
| ZNF507   | 298401  | 596 | -66 | 2436820 | 641156 | 0 | 15 | 4 | 0 | 50 | 116 | 28978044 | 2.86E-01 | 1 |
| CCDC90B  | 308108  | 414 | 18  | 683164  | 168032 | 0 | 3  | 0 | 0 | 50 | 53  | 24526620 | 2.86E-01 | 1 |
| ANKS4B   | 402663  | 575 | 41  | 1055896 | 289784 | 0 | 5  | 0 | 0 | 50 | 69  | 22447580 | 2.86E-01 | 1 |
| OPN1SW   | 830283  | 310 | 35  | 885728  | 251692 | 0 | 4  | 1 | 0 | 50 | 76  | 22960220 | 2.86E-01 | 1 |
| SNCG     | 401785  | 164 | 45  | 339624  | 87576  | 0 | 2  | 0 | 0 | 50 | 45  | 17084796 | 2.86E-01 | 1 |
| RNASE9   | 637784  | 493 | 22  | 553580  | 136348 | 0 | 2  | 1 | 0 | 50 | 49  | 16434740 | 2.87E-01 | 1 |
| FGD2     | 832054  | 220 | 41  | 1684948 | 480956 | 0 | 7  | 1 | 0 | 50 | 65  | 22074136 | 2.87E-01 | 1 |
| NUP155   | 339666  | 151 | 25  | 3639744 | 969744 | 0 | 16 | 3 | 0 | 21 | 26  | 12461424 | 2.87E-01 | 1 |
| DUSP12   | 447958  | 504 | 29  | 878252  | 237808 | 0 | 2  | 0 | 0 | 50 | 38  | 20965196 | 2.87E-01 | 1 |
| PDIA3    | 784327  | 286 | 37  | 1334288 | 338200 | 0 | 5  | 0 | 0 | 17 | 14  | 6234272  | 2.87E-01 | 1 |
| ENTPD2   | 1951939 | 202 | 40  | 1227132 | 398364 | 0 | 3  | 1 | 0 | 50 | 61  | 21392396 | 2.87E-01 | 1 |
| GDI2     | 656468  | 303 | 43  | 1174088 | 297616 | 0 | 5  | 1 | 0 | 50 | 43  | 20856972 | 2.87E-01 | 1 |
| CLEC6A   | 321790  | 564 | 13  | 564972  | 129228 | 0 | 2  | 0 | 0 | 50 | 64  | 21703896 | 2.87E-01 | 1 |
| CNR2     | 923316  | 254 | 23  | 876828  | 284088 | 0 | 4  | 0 | 0 | 50 | 60  | 19342192 | 2.88E-01 | 1 |
| H1FNT    | 809696  | 412 | 16  | 614812  | 205412 | 0 | 4  | 1 | 0 | 50 | 60  | 19819232 | 2.88E-01 | 1 |
| GMPPA    | 559651  | 403 | 32  | 1089360 | 315060 | 0 | 4  | 1 | 0 | 50 | 45  | 17782200 | 2.88E-01 | 1 |
| REM1     | 605825  | 450 | -76 | 728732  | 242080 | 0 | 3  | 0 | 0 | 7  | 4   | 2020300  | 2.88E-01 | 1 |
| ZNF665   | 392290  | 946 | -49 | 1751876 | 436456 | 0 | 11 | 1 | 0 | 50 | 50  | 16685008 | 2.88E-01 | 1 |

|          |         |      |     |         |        |   |    |   |   |    |     |          |          |   |
|----------|---------|------|-----|---------|--------|---|----|---|---|----|-----|----------|----------|---|
| FOXP1    | 99202   | 675  | -1  | 1915636 | 505520 | 0 | 6  | 2 | 0 | 35 | 43  | 13423336 | 2.88E-01 | 1 |
| ATP11A   | 585697  | 416  | 45  | 3179792 | 850840 | 0 | 11 | 3 | 0 | 50 | 74  | 25844176 | 2.88E-01 | 1 |
| C10orf35 | 824126  | 519  | 31  | 299396  | 100036 | 0 | 2  | 1 | 0 | 42 | 47  | 15680376 | 2.89E-01 | 1 |
| ZNF419   | 455231  | 801  | -28 | 1329304 | 328232 | 0 | 3  | 0 | 0 | 28 | 22  | 9242828  | 2.89E-01 | 1 |
| CETN2    | 201810  | NaN  | -3  | 465648  | 107868 | 0 | 3  | 0 | 0 | 50 | 44  | 16214020 | 2.89E-01 | 1 |
| FGR      | 732210  | 217  | 24  | 1370244 | 374868 | 0 | 6  | 2 | 0 | 50 | 74  | 26421608 | 2.89E-01 | 1 |
| PAGE1    | 355308  | NaN  | 14  | 394804  | 99680  | 0 | 2  | 0 | 0 | 50 | 61  | 25040684 | 2.89E-01 | 1 |
| IL32     | 1626425 | 234  | 44  | 510860  | 126736 | 0 | 2  | 1 | 0 | 50 | 77  | 22657976 | 2.89E-01 | 1 |
| NEUROD1  | 210899  | 380  | 17  | 897120  | 250980 | 0 | 4  | 2 | 0 | 33 | 32  | 10958036 | 2.89E-01 | 1 |
| GSC      | 195536  | 892  | 8   | 634748  | 200428 | 0 | 3  | 0 | 0 | 50 | 68  | 20770108 | 2.89E-01 | 1 |
| PCIF1    | 725555  | 209  | 59  | 1810972 | 511928 | 0 | 10 | 4 | 0 | 10 | 8   | 3232836  | 2.89E-01 | 1 |
| S100A7A  | 1140044 | 401  | 32  | 272340  | 63012  | 0 | 2  | 0 | 0 | 50 | 58  | 17066640 | 2.89E-01 | 1 |
| COQ6     | 443041  | 158  | 51  | 1234964 | 316840 | 0 | 7  | 1 | 0 | 50 | 55  | 19172380 | 2.89E-01 | 1 |
| KDELC1   | 195534  | 475  | 24  | 1317200 | 332860 | 0 | 5  | 2 | 0 | 50 | 40  | 16969452 | 2.90E-01 | 1 |
| GINS4    | 325055  | 496  | 29  | 597368  | 150232 | 0 | 4  | 1 | 0 | 5  | 8   | 2418308  | 2.90E-01 | 1 |
| SMEK2    | 597106  | 382  | 25  | 2223932 | 567820 | 0 | 11 | 2 | 0 | 27 | 31  | 12652240 | 2.90E-01 | 1 |
| KPNB1    | 1198427 | 217  | 24  | 2281604 | 619084 | 0 | 10 | 2 | 0 | 21 | 30  | 9209008  | 2.90E-01 | 1 |
| VTIIA    | 232217  | 459  | 7   | 579924  | 148452 | 0 | 2  | 0 | 0 | 50 | 51  | 21285240 | 2.90E-01 | 1 |
| ZBTB47   | 359739  | 329  | 38  | 1880748 | 537204 | 0 | 6  | 0 | 0 | 15 | 11  | 6409424  | 2.90E-01 | 1 |
| ARRB1    | 740999  | 252  | 46  | 1105736 | 300820 | 0 | 4  | 0 | 0 | 27 | 27  | 11840204 | 2.90E-01 | 1 |
| NUDT17   | NaN     | NaN  | NaN | 822360  | 268068 | 0 | 3  | 2 | 0 | 39 | 100 | 30990156 | 2.90E-01 | 1 |
| FTCD     | 742075  | 538  | 10  | 1362056 | 436456 | 0 | 4  | 2 | 0 | 50 | 61  | 21237180 | 2.90E-01 | 1 |
| ANKRD54  | 1385064 | 203  | 66  | 759704  | 236740 | 0 | 3  | 0 | 0 | 50 | 52  | 18523392 | 2.90E-01 | 1 |
| RGS5     | 194452  | 794  | -8  | 484160  | 116056 | 0 | 2  | 1 | 0 | 8  | 2   | 2485236  | 2.90E-01 | 1 |
| FAM127B  | 304745  | NaN  | 42  | 332148  | 101460 | 0 | 2  | 0 | 0 | 50 | 59  | 20553304 | 2.90E-01 | 1 |
| SP4      | 105280  | 643  | 26  | 1941624 | 594876 | 0 | 8  | 0 | 0 | 47 | 37  | 21302684 | 2.91E-01 | 1 |
| RYBP     | 102513  | 607  | 32  | 561768  | 152724 | 0 | 2  | 0 | 0 | 50 | 38  | 23272788 | 2.91E-01 | 1 |
| GABRA1   | 12179   | 927  | -16 | 1179072 | 323604 | 0 | 11 | 3 | 0 | 17 | 32  | 7338584  | 2.91E-01 | 1 |
| LRRCC1   | 99309   | 1450 | -7  | 2742268 | 644360 | 0 | 15 | 1 | 0 | 41 | 44  | 19063800 | 2.91E-01 | 1 |
| SIRPG    | 421072  | 486  | 32  | 971880  | 294768 | 0 | 5  | 1 | 0 | 50 | 34  | 16659020 | 2.91E-01 | 1 |
| PRC1     | 753718  | 413  | 31  | 1637600 | 411892 | 0 | 8  | 1 | 0 | 42 | 60  | 20298408 | 2.91E-01 | 1 |
| RFTN1    | 117533  | 528  | 29  | 1478824 | 414740 | 0 | 5  | 2 | 0 | 15 | 12  | 7128544  | 2.91E-01 | 1 |
| GET4     | 737267  | 310  | 41  | 847992  | 239232 | 0 | 4  | 0 | 0 | 50 | 43  | 21549036 | 2.91E-01 | 1 |

|          |         |     |     |         |         |   |    |   |   |    |    |          |          |   |
|----------|---------|-----|-----|---------|---------|---|----|---|---|----|----|----------|----------|---|
| DNAJC1   | 197451  | 608 | 2   | 1434680 | 390532  | 0 | 4  | 0 | 0 | 14 | 12 | 5599880  | 2.91E-01 | 1 |
| TCEB3B   | 120831  | 639 | 34  | 1856184 | 559632  | 0 | 10 | 2 | 0 | 50 | 61 | 20147820 | 2.91E-01 | 1 |
| PNP      | 464497  | 395 | 17  | 744396  | 206124  | 0 | 4  | 0 | 0 | 50 | 58 | 21385632 | 2.91E-01 | 1 |
| FAM96A   | 740524  | 234 | 48  | 421860  | 111072  | 0 | 2  | 0 | 0 | 50 | 49 | 21541204 | 2.92E-01 | 1 |
| PLAC1    | 268956  | NaN | 39  | 540764  | 145960  | 0 | 2  | 0 | 0 | 50 | 70 | 21315144 | 2.92E-01 | 1 |
| DDX59    | 371965  | 276 | 13  | 1583132 | 433252  | 0 | 7  | 0 | 0 | 38 | 34 | 17241792 | 2.92E-01 | 1 |
| PTP4A3   | 170603  | 382 | 51  | 448204  | 126380  | 0 | 1  | 1 | 0 | 50 | 49 | 19034608 | 2.92E-01 | 1 |
| GLO1     | 280153  | 845 | 28  | 495908  | 118192  | 0 | 1  | 0 | 0 | 50 | 71 | 25337944 | 2.92E-01 | 1 |
| TTLL9    | 1011028 | 241 | 37  | 1180140 | 291564  | 0 | 6  | 0 | 0 | 50 | 57 | 18029620 | 2.92E-01 | 1 |
| TNP1     | 261601  | 642 | 23  | 150232  | 35600   | 0 | 1  | 0 | 0 | 50 | 44 | 18467856 | 2.92E-01 | 1 |
| MED12    | 759088  | NaN | 27  | 5597388 | 1568892 | 0 | 20 | 2 | 0 | 25 | 26 | 13759400 | 2.93E-01 | 1 |
| LGSN     | 255425  | 359 | -9  | 1320760 | 328232  | 0 | 5  | 0 | 0 | 50 | 41 | 21634120 | 2.93E-01 | 1 |
| POPDC3   | 108747  | 650 | 2   | 738700  | 205412  | 0 | 3  | 0 | 0 | 50 | 54 | 20440808 | 2.93E-01 | 1 |
| SDHA     | 1040169 | 530 | 24  | 1692068 | 498400  | 0 | 9  | 1 | 0 | 50 | 65 | 18657604 | 2.93E-01 | 1 |
| IPO9     | 764022  | 208 | 26  | 2691360 | 747600  | 0 | 8  | 0 | 0 | 19 | 20 | 11701008 | 2.93E-01 | 1 |
| MS4A6A   | 336539  | 784 | -2  | 681028  | 169100  | 0 | 1  | 0 | 0 | 50 | 44 | 22125044 | 2.93E-01 | 1 |
| LASP1    | 1255539 | 159 | 41  | 699184  | 165896  | 0 | 3  | 0 | 0 | 50 | 69 | 22650856 | 2.93E-01 | 1 |
| SYTL3    | 606618  | 188 | 51  | 1407624 | 387684  | 0 | 6  | 0 | 0 | 20 | 15 | 6931676  | 2.93E-01 | 1 |
| TMEM145  | 792230  | 218 | 42  | 1267004 | 377716  | 0 | 8  | 2 | 0 | 37 | 50 | 17369596 | 2.93E-01 | 1 |
| NUP50    | 395347  | 362 | -13 | 1201856 | 330724  | 0 | 4  | 0 | 0 | 37 | 27 | 13665060 | 2.93E-01 | 1 |
| ZBTB8OS  | 1441027 | 144 | 28  | 493416  | 111072  | 0 | 1  | 0 | 0 | 50 | 54 | 20815676 | 2.94E-01 | 1 |
| LYSMD1   | 1562281 | 184 | 33  | 594876  | 184764  | 0 | 4  | 0 | 0 | 5  | 6  | 1818092  | 2.94E-01 | 1 |
| TAS2R14  | 363803  | 644 | 2   | 789608  | 228196  | 0 | 3  | 1 | 0 | 50 | 61 | 20572172 | 2.94E-01 | 1 |
| RAB34    | 1695792 | 208 | 40  | 883948  | 244928  | 0 | 2  | 1 | 0 | 50 | 81 | 25518436 | 2.94E-01 | 1 |
| PRAP1    | 386585  | 472 | 13  | 399432  | 106800  | 0 | 1  | 1 | 0 | 10 | 5  | 3076908  | 2.94E-01 | 1 |
| IGSF1    | 42910   | NaN | 15  | 3472068 | 972948  | 0 | 11 | 4 | 0 | 50 | 59 | 19502036 | 2.94E-01 | 1 |
| RASSF3   | 450247  | 476 | 17  | 625848  | 156996  | 0 | 2  | 0 | 0 | 50 | 62 | 20810692 | 2.94E-01 | 1 |
| GTPBP1   | 1291659 | 272 | 73  | 1679608 | 514064  | 0 | 5  | 1 | 0 | 50 | 42 | 16818864 | 2.94E-01 | 1 |
| PDE7A    | 167106  | 425 | 37  | 1356360 | 342828  | 0 | 5  | 1 | 0 | 50 | 67 | 22724192 | 2.94E-01 | 1 |
| SPESP1   | 373553  | 452 | 33  | 886440  | 242436  | 0 | 4  | 0 | 0 | 47 | 44 | 17980848 | 2.95E-01 | 1 |
| PNRC1    | 307937  | 375 | 29  | 794236  | 260948  | 0 | 3  | 0 | 0 | 50 | 34 | 20041020 | 2.95E-01 | 1 |
| C16orf46 | 259514  | 284 | 8   | 1013888 | 291208  | 0 | 5  | 0 | 0 | 50 | 41 | 18618444 | 2.95E-01 | 1 |
| MED11    | 1272092 | 222 | 28  | 300108  | 88644   | 0 | 2  | 0 | 0 | 50 | 74 | 23892584 | 2.95E-01 | 1 |

|          |         |      |     |         |         |   |    |   |   |    |    |          |          |   |
|----------|---------|------|-----|---------|---------|---|----|---|---|----|----|----------|----------|---|
| LRRN3    | 65006   | 840  | 2   | 1766828 | 504808  | 0 | 7  | 0 | 0 | 37 | 42 | 16801420 | 2.95E-01 | 1 |
| DIS3L    | 530074  | 307  | 44  | 2725180 | 725528  | 0 | 8  | 1 | 0 | 34 | 30 | 17301956 | 2.95E-01 | 1 |
| LRBA     | 207641  | 848  | 17  | 7401952 | 2013536 | 0 | 21 | 2 | 0 | 10 | 8  | 4560716  | 2.95E-01 | 1 |
| GBP5     | 379427  | 834  | -4  | 1529732 | 393736  | 0 | 6  | 2 | 0 | 50 | 62 | 19610616 | 2.95E-01 | 1 |
| PKLR     | 1574928 | 194  | 45  | 1436460 | 460308  | 0 | 6  | 2 | 0 | 50 | 57 | 20795740 | 2.95E-01 | 1 |
| RARS2    | 236344  | 534  | 28  | 1543260 | 397296  | 0 | 6  | 1 | 0 | 33 | 29 | 11460352 | 2.95E-01 | 1 |
| CRYBB2   | 174680  | 535  | -35 | 547884  | 135636  | 0 | 2  | 1 | 0 | 50 | 76 | 19885092 | 2.96E-01 | 1 |
| FBXO4    | 113456  | 795  | 23  | 1025992 | 270560  | 0 | 5  | 0 | 0 | 50 | 47 | 19282028 | 2.96E-01 | 1 |
| TEPP     | 856192  | 158  | 9   | 769316  | 220720  | 0 | 3  | 0 | 0 | 50 | 56 | 19314424 | 2.96E-01 | 1 |
| AP3B1    | 262852  | 592  | 40  | 2860816 | 758636  | 0 | 9  | 1 | 0 | 27 | 18 | 8882912  | 2.96E-01 | 1 |
| DSG2     | 284905  | 450  | 1   | 2831624 | 813460  | 0 | 9  | 3 | 0 | 50 | 61 | 24671868 | 2.96E-01 | 1 |
| ZNF521   | 24828   | 599  | -1  | 3378796 | 853688  | 0 | 17 | 6 | 0 | 15 | 24 | 7552896  | 2.96E-01 | 1 |
| COL16A1  | 1126016 | 197  | 37  | 4142772 | 1298688 | 0 | 13 | 2 | 0 | 8  | 9  | 3875772  | 2.96E-01 | 1 |
| BPGM     | 388879  | 392  | 23  | 663584  | 178000  | 0 | 1  | 0 | 0 | 50 | 38 | 20327600 | 2.96E-01 | 1 |
| IGF2     | 837088  | 579  | 38  | 592384  | 184052  | 0 | 3  | 0 | 0 | 50 | 46 | 19328664 | 2.96E-01 | 1 |
| CORO1C   | 451218  | 217  | 40  | 1246712 | 317908  | 0 | 5  | 0 | 0 | 33 | 18 | 10547924 | 2.96E-01 | 1 |
| ZNF180   | 743733  | 511  | -55 | 1800648 | 436812  | 0 | 10 | 0 | 0 | 3  | 7  | 2228916  | 2.96E-01 | 1 |
| BIN1     | 324544  | 324  | 17  | 1592388 | 440016  | 0 | 5  | 2 | 0 | 11 | 11 | 5228572  | 2.96E-01 | 1 |
| CXorf56  | 617823  | NaN  | 30  | 597012  | 147384  | 0 | 2  | 0 | 0 | 50 | 75 | 22656552 | 2.96E-01 | 1 |
| PHTF2    | 246673  | 730  | 25  | 2001432 | 540408  | 0 | 7  | 2 | 0 | 17 | 19 | 6589916  | 2.96E-01 | 1 |
| TAAR8    | 178165  | 618  | 22  | 850484  | 246352  | 0 | 4  | 0 | 0 | 42 | 38 | 17775792 | 2.96E-01 | 1 |
| C6orf222 | 891439  | 192  | 38  | 1670352 | 468852  | 0 | 10 | 0 | 0 | 2  | 4  | 1620868  | 2.96E-01 | 1 |
| GTF2H4   | 2223866 | 223  | 25  | 1190108 | 348880  | 0 | 3  | 2 | 0 | 50 | 73 | 23168480 | 2.96E-01 | 1 |
| LZTS1    | 157405  | 592  | 9   | 1474908 | 446424  | 0 | 4  | 0 | 0 | 23 | 18 | 10899652 | 2.97E-01 | 1 |
| TRIP4    | 764707  | 198  | 40  | 1523680 | 394448  | 0 | 6  | 0 | 0 | 2  | 2  | 2322900  | 2.97E-01 | 1 |
| CDH4     | 437973  | 867  | -61 | 2321476 | 682808  | 0 | 16 | 2 | 0 | 13 | 22 | 5201872  | 2.97E-01 | 1 |
| RALYL    | 28254   | 1435 | -22 | 802424  | 208972  | 0 | 5  | 0 | 0 | 21 | 16 | 5960152  | 2.97E-01 | 1 |
| PSMA5    | 1073027 | 302  | 26  | 644716  | 166964  | 0 | 4  | 0 | 0 | 50 | 52 | 20758716 | 2.97E-01 | 1 |
| MAT1A    | 365795  | 598  | 44  | 1013176 | 289784  | 0 | 4  | 1 | 0 | 50 | 60 | 20195880 | 2.97E-01 | 1 |
| ANGPT4   | 824412  | 579  | 36  | 1291212 | 358848  | 0 | 5  | 2 | 0 | 50 | 49 | 19535144 | 2.97E-01 | 1 |
| CDH2     | 43239   | 931  | -16 | 2320408 | 649700  | 0 | 14 | 4 | 0 | 50 | 62 | 20808556 | 2.97E-01 | 1 |
| TYW1     | 423966  | 491  | 32  | 1940556 | 472056  | 0 | 5  | 0 | 0 | 9  | 1  | 2258108  | 2.97E-01 | 1 |
| C7orf50  | 769674  | 346  | 35  | 489144  | 151656  | 0 | 2  | 0 | 0 | 50 | 35 | 18959492 | 2.97E-01 | 1 |



|           |         |     |     |          |         |   |    |   |   |    |    |          |          |   |
|-----------|---------|-----|-----|----------|---------|---|----|---|---|----|----|----------|----------|---|
| LRP2      | 420134  | 683 | 14  | 12212224 | 3038816 | 0 | 39 | 6 | 0 | 4  | 8  | 4434692  | 2.98E-01 | 1 |
| UBE2D1    | 153069  | 326 | -12 | 402280   | 97544   | 0 | 2  | 0 | 0 | 50 | 59 | 23816400 | 2.98E-01 | 1 |
| AP2S1     | 1217560 | 186 | 44  | 378784   | 96476   | 0 | 1  | 1 | 0 | 22 | 32 | 9588860  | 2.98E-01 | 1 |
| GPHB5     | 147817  | 637 | -12 | 224636   | 74404   | 0 | 2  | 1 | 0 | 4  | 3  | 1349240  | 2.98E-01 | 1 |
| χIAA0319I | 956500  | 451 | 27  | 2705244  | 744396  | 0 | 12 | 2 | 0 | 4  | 12 | 5851572  | 2.98E-01 | 1 |
| PSMA4     | 505832  | 375 | 46  | 703812   | 169812  | 0 | 3  | 1 | 0 | 41 | 51 | 15870836 | 2.98E-01 | 1 |
| HOXB6     | 946208  | 524 | 29  | 563904   | 165540  | 0 | 4  | 1 | 0 | 50 | 60 | 17564684 | 2.98E-01 | 1 |
| LDOC1L    | 216551  | 425 | 14  | 567464   | 201496  | 0 | 2  | 1 | 0 | 50 | 58 | 21676128 | 2.98E-01 | 1 |
| LGR6      | 674939  | 297 | 37  | 2515852  | 813104  | 0 | 8  | 2 | 0 | 50 | 56 | 22223656 | 2.98E-01 | 1 |
| OOEP      | 732413  | 446 | 18  | 377360   | 111784  | 0 | 2  | 1 | 0 | 12 | 13 | 3339992  | 2.98E-01 | 1 |
| TCEB2     | 1717244 | 210 | 42  | 426844   | 117836  | 0 | 1  | 0 | 0 | 50 | 80 | 24105472 | 2.98E-01 | 1 |
| KRCC1     | 169985  | 543 | 5   | 679248   | 158064  | 0 | 5  | 1 | 0 | 28 | 31 | 10475300 | 2.98E-01 | 1 |
| MINA      | 158573  | 723 | -2  | 1204704  | 326808  | 0 | 7  | 1 | 0 | 5  | 8  | 2006060  | 2.99E-01 | 1 |
| CLDN19    | 735401  | 426 | 26  | 689572   | 170168  | 0 | 2  | 0 | 0 | 50 | 74 | 27615988 | 2.99E-01 | 1 |
| PRKRIP1   | 579276  | 202 | 61  | 494484   | 121752  | 0 | 2  | 1 | 0 | 50 | 62 | 18465720 | 2.99E-01 | 1 |
| RASAL2    | 168177  | 435 | -9  | 3304392  | 911004  | 0 | 16 | 2 | 0 | 16 | 21 | 7639404  | 2.99E-01 | 1 |
| MKRN3     | 94496   | 904 | -55 | 1261664  | 365968  | 0 | 8  | 2 | 0 | 34 | 37 | 11827744 | 2.99E-01 | 1 |
| MT1H      | 661565  | 143 | 26  | 173372   | 35956   | 0 | 1  | 0 | 0 | 50 | 43 | 20327956 | 2.99E-01 | 1 |
| CLDN5     | 770036  | 298 | 22  | 716628   | 261660  | 0 | 3  | 1 | 0 | 50 | 72 | 23922488 | 2.99E-01 | 1 |
| RSL1D1    | 558203  | 294 | 37  | 1264512  | 344964  | 0 | 6  | 1 | 0 | 50 | 41 | 18471772 | 2.99E-01 | 1 |
| CNOT2     | 156657  | 609 | -17 | 1433256  | 364188  | 0 | 4  | 1 | 0 | 50 | 44 | 23827080 | 2.99E-01 | 1 |
| FASTK     | 622098  | 373 | 41  | 1342120  | 460664  | 0 | 5  | 2 | 0 | 32 | 43 | 16522672 | 2.99E-01 | 1 |
| LYPD6     | 105128  | 631 | -8  | 446424   | 121752  | 0 | 2  | 0 | 0 | 50 | 43 | 19883668 | 2.99E-01 | 1 |
| EBI3      | 2132502 | 244 | 39  | 576364   | 179780  | 0 | 1  | 0 | 0 | 50 | 48 | 20510584 | 2.99E-01 | 1 |
| LCN15     | 1898901 | 190 | 39  | 489856   | 130652  | 0 | 1  | 1 | 0 | 50 | 67 | 24888672 | 2.99E-01 | 1 |
| JDP2      | 758517  | 239 | 44  | 440372   | 133144  | 0 | 2  | 0 | 0 | 50 | 52 | 22293432 | 2.99E-01 | 1 |
| EIF2A     | 436939  | 347 | 24  | 1536140  | 399076  | 0 | 3  | 0 | 0 | 30 | 20 | 9670384  | 2.99E-01 | 1 |
| CDCA7L    | 687019  | 581 | -1  | 1187260  | 309008  | 0 | 7  | 0 | 0 | 5  | 6  | 2504104  | 2.99E-01 | 1 |
| TRH       | 329991  | 389 | 43  | 603064   | 184052  | 0 | 3  | 0 | 0 | 50 | 53 | 21555444 | 3.00E-01 | 1 |
| THRSP     | 556958  | 209 | 38  | 373800   | 103596  | 0 | 3  | 1 | 0 | 25 | 31 | 8327908  | 3.00E-01 | 1 |
| CLIP3     | 980636  | 320 | 19  | 1389824  | 421504  | 0 | 4  | 1 | 0 | 24 | 26 | 11494528 | 3.00E-01 | 1 |
| LOX       | 69939   | 707 | 0   | 1056964  | 307940  | 0 | 5  | 0 | 0 | 40 | 45 | 16381340 | 3.00E-01 | 1 |
| FBLN5     | 333910  | 440 | 29  | 1176580  | 304736  | 0 | 2  | 0 | 0 | 50 | 35 | 23272432 | 3.00E-01 | 1 |

|          |         |      |     |         |         |   |    |   |   |    |     |          |          |   |
|----------|---------|------|-----|---------|---------|---|----|---|---|----|-----|----------|----------|---|
| RTAP12-4 | 874480  | 461  | 25  | 361696  | 111428  | 0 | 1  | 0 | 0 | 50 | 76  | 22638396 | 3.00E-01 | 1 |
| EMID1    | 854820  | 251  | 51  | 1125672 | 358848  | 0 | 5  | 1 | 0 | 50 | 60  | 20958788 | 3.00E-01 | 1 |
| ELMOD2   | 125708  | 752  | 7   | 801356  | 174796  | 0 | 3  | 0 | 0 | 50 | 77  | 23962716 | 3.01E-01 | 1 |
| FAM162A  | 416095  | 478  | 34  | 413672  | 102172  | 0 | 2  | 1 | 0 | 19 | 11  | 5724124  | 3.01E-01 | 1 |
| FTHL17   | 77068   | NaN  | 8   | 460308  | 131364  | 0 | 3  | 0 | 0 | 50 | 91  | 26528408 | 3.01E-01 | 1 |
| HOXC6    | 1185281 | 279  | 54  | 593452  | 166964  | 0 | 4  | 2 | 0 | 14 | 21  | 4635120  | 3.01E-01 | 1 |
| SLC4A4   | 216580  | 975  | -4  | 3041664 | 803136  | 0 | 10 | 2 | 0 | 50 | 63  | 21170964 | 3.01E-01 | 1 |
| HBEGF    | 683517  | 143  | 39  | 528304  | 162692  | 0 | 1  | 1 | 0 | 34 | 31  | 12849108 | 3.01E-01 | 1 |
| EXOC5    | 176601  | 944  | 13  | 1894632 | 449628  | 0 | 6  | 0 | 0 | 16 | 12  | 5780372  | 3.01E-01 | 1 |
| UCHL5    | 288979  | 433  | -18 | 898188  | 201852  | 0 | 3  | 1 | 0 | 50 | 53  | 19227560 | 3.01E-01 | 1 |
| OSBP     | 432625  | 353  | 6   | 2070140 | 574228  | 0 | 5  | 3 | 0 | 50 | 42  | 19696056 | 3.01E-01 | 1 |
| MYH11    | 435762  | 283  | 29  | 5215044 | 1343544 | 0 | 19 | 5 | 0 | 27 | 33  | 11942376 | 3.01E-01 | 1 |
| NOL4     | 10823   | 966  | -14 | 1654332 | 435744  | 0 | 7  | 1 | 0 | 50 | 82  | 24136444 | 3.01E-01 | 1 |
| FAM110C  | 123809  | 705  | NaN | 761840  | 274120  | 0 | 4  | 1 | 0 | 15 | 17  | 7089740  | 3.01E-01 | 1 |
| PGD      | 712477  | 383  | 24  | 1260240 | 343896  | 0 | 5  | 1 | 0 | 50 | 75  | 29160672 | 3.02E-01 | 1 |
| CDH22    | 553454  | 583  | 44  | 2046644 | 652192  | 0 | 10 | 4 | 0 | 26 | 32  | 10484556 | 3.02E-01 | 1 |
| TIGD3    | 4112809 | 242  | 50  | 1143116 | 373444  | 0 | 2  | 1 | 0 | 27 | 30  | 12483852 | 3.02E-01 | 1 |
| RPL18A   | 1216364 | 212  | 37  | 458172  | 130296  | 0 | 1  | 0 | 0 | 50 | 49  | 17585332 | 3.02E-01 | 1 |
| MPZL1    | 546300  | 319  | 16  | 690640  | 195800  | 0 | 3  | 1 | 0 | 50 | 66  | 20961636 | 3.02E-01 | 1 |
| ZNF28    | 557083  | 1008 | -39 | 1724108 | 414028  | 0 | 8  | 3 | 0 | 50 | 82  | 22084104 | 3.02E-01 | 1 |
| NELL1    | 45732   | 989  | -19 | 2152376 | 527236  | 0 | 9  | 4 | 0 | 11 | 17  | 5000376  | 3.02E-01 | 1 |
| ZFAND1   | 158801  | 681  | 12  | 767180  | 178000  | 0 | 4  | 1 | 0 | 50 | 67  | 18347172 | 3.02E-01 | 1 |
| TMEM50B  | 884788  | 182  | 63  | 429336  | 105732  | 0 | 2  | 0 | 0 | 50 | 40  | 16445776 | 3.02E-01 | 1 |
| KCNRG    | 337743  | 357  | 44  | 769316  | 218584  | 0 | 3  | 2 | 0 | 27 | 28  | 10846252 | 3.02E-01 | 1 |
| MVP      | NaN     | NaN  | NaN | 2228560 | 702032  | 0 | 8  | 1 | 0 | 50 | 117 | 40347616 | 3.03E-01 | 1 |
| SNW1     | 442490  | 359  | 42  | 1474196 | 377716  | 0 | 6  | 1 | 0 | 50 | 45  | 20762988 | 3.03E-01 | 1 |
| HSF4     | 1101399 | 150  | 46  | 1287296 | 358492  | 0 | 4  | 0 | 0 | 7  | 2   | 3466372  | 3.03E-01 | 1 |
| ZNF644   | 223798  | 843  | -7  | 3400868 | 875404  | 0 | 14 | 2 | 0 | 13 | 16  | 7704196  | 3.03E-01 | 1 |
| SSBP3    | 695802  | 369  | 25  | 1039164 | 279816  | 0 | 3  | 1 | 0 | 50 | 56  | 23000448 | 3.03E-01 | 1 |
| FARSB    | 267637  | 308  | 18  | 1547532 | 413316  | 0 | 5  | 0 | 0 | 9  | 9   | 5009988  | 3.03E-01 | 1 |
| EIF4B    | 1726226 | 177  | 38  | 1583132 | 437524  | 0 | 4  | 0 | 0 | 4  | 1   | 2378080  | 3.03E-01 | 1 |
| CST11    | 188567  | 750  | -16 | 373444  | 84728   | 0 | 2  | 1 | 0 | 11 | 14  | 3491648  | 3.03E-01 | 1 |
| CYP4A22  | 364960  | 414  | 3   | 1343544 | 373800  | 0 | 5  | 3 | 0 | 50 | 53  | 20385984 | 3.04E-01 | 1 |

|          |         |      |     |         |        |   |    |   |   |    |    |          |          |   |
|----------|---------|------|-----|---------|--------|---|----|---|---|----|----|----------|----------|---|
| PVALB    | 1248441 | 537  | 35  | 302600  | 70132  | 0 | 2  | 0 | 0 | 50 | 96 | 28965228 | 3.04E-01 | 1 |
| PAH      | 23724   | 961  | -3  | 1190820 | 311856 | 0 | 9  | 1 | 0 | 50 | 94 | 20550456 | 3.04E-01 | 1 |
| FAM47B   | 6541    | NaN  | -14 | 1586692 | 485228 | 0 | 10 | 2 | 0 | 50 | 93 | 25240756 | 3.04E-01 | 1 |
| OR5AC2   | 200002  | 811  | -15 | 765044  | 226060 | 0 | 4  | 1 | 0 | 50 | 87 | 21088372 | 3.04E-01 | 1 |
| MRPL47   | 397411  | 520  | 10  | 661092  | 170880 | 0 | 2  | 0 | 0 | 50 | 51 | 19040304 | 3.04E-01 | 1 |
| FCN3     | 866116  | 188  | 28  | 775368  | 217872 | 0 | 4  | 0 | 0 | 50 | 83 | 26057420 | 3.04E-01 | 1 |
| ZNF829   | 308757  | 976  | -38 | 1342832 | 331792 | 0 | 8  | 2 | 0 | 50 | 98 | 20471068 | 3.04E-01 | 1 |
| ANO4     | 245388  | 937  | -16 | 2450704 | 606980 | 0 | 12 | 4 | 0 | 50 | 70 | 16647984 | 3.04E-01 | 1 |
| ACTA1    | 243405  | 361  | 29  | 967252  | 269492 | 0 | 4  | 1 | 0 | 50 | 41 | 20173452 | 3.04E-01 | 1 |
| ING3     | 105792  | 514  | 7   | 1121044 | 283376 | 0 | 5  | 1 | 0 | 50 | 62 | 21516284 | 3.04E-01 | 1 |
| FERMT3   | 1602391 | 278  | 57  | 1708800 | 491280 | 0 | 11 | 2 | 0 | 50 | 67 | 20864092 | 3.04E-01 | 1 |
| PHB2     | 2704950 | 211  | 47  | 770740  | 224636 | 0 | 3  | 0 | 0 | 1  | 0  | 1215740  | 3.04E-01 | 1 |
| OR51I2   | 99042   | 1030 | 1   | 766468  | 240656 | 0 | 2  | 0 | 0 | 50 | 49 | 19819232 | 3.05E-01 | 1 |
| AGTPBP1  | 227838  | 613  | 9   | 3110728 | 799220 | 0 | 10 | 2 | 0 | 19 | 21 | 10301928 | 3.05E-01 | 1 |
| IL10RB   | 861800  | 317  | 87  | 856180  | 216092 | 0 | 5  | 1 | 0 | 38 | 46 | 17976932 | 3.05E-01 | 1 |
| OR2A2    | 221024  | 812  | -11 | 780708  | 239232 | 0 | 5  | 1 | 0 | 50 | 70 | 20067720 | 3.05E-01 | 1 |
| ZNF84    | NaN     | NaN  | NaN | 1927740 | 452832 | 0 | 9  | 4 | 0 | 26 | 44 | 12029952 | 3.05E-01 | 1 |
| MEPE     | 423426  | 538  | 1   | 1360276 | 337844 | 0 | 8  | 0 | 0 | 50 | 86 | 25028936 | 3.05E-01 | 1 |
| IFNA4    | 137739  | 498  | 1   | 479176  | 131720 | 0 | 4  | 1 | 0 | 8  | 11 | 3212900  | 3.05E-01 | 1 |
| ACTR1A   | 871726  | 178  | 41  | 975440  | 275188 | 0 | 4  | 1 | 0 | 50 | 63 | 21586416 | 3.05E-01 | 1 |
| TP53INP1 | 418153  | 395  | 48  | 650768  | 159844 | 0 | 4  | 1 | 0 | 22 | 28 | 9035280  | 3.06E-01 | 1 |
| ACAT1    | 417904  | 695  | 19  | 1106448 | 313992 | 0 | 4  | 1 | 0 | 20 | 21 | 7720572  | 3.06E-01 | 1 |
| KLRC4    | 378365  | 334  | 0   | 416876  | 105376 | 0 | 2  | 0 | 0 | 50 | 50 | 21701404 | 3.06E-01 | 1 |
| LRTM1    | 29081   | 629  | 24  | 862588  | 256676 | 0 | 2  | 0 | 0 | 50 | 45 | 22431916 | 3.06E-01 | 1 |
| GJB3     | 548013  | 580  | 19  | 668568  | 203988 | 0 | 3  | 2 | 0 | 49 | 58 | 16973724 | 3.06E-01 | 1 |
| C2orf48  | 881918  | 220  | 41  | 409044  | 116412 | 0 | 1  | 0 | 0 | 50 | 71 | 24529112 | 3.06E-01 | 1 |
| MSTN     | 508463  | 478  | 28  | 957640  | 255608 | 0 | 5  | 2 | 0 | 14 | 13 | 6396252  | 3.06E-01 | 1 |
| GFRAL    | 28347   | 729  | -14 | 1058032 | 243860 | 0 | 5  | 0 | 0 | 11 | 19 | 6549332  | 3.06E-01 | 1 |
| ST13     | 894425  | 269  | 44  | 993596  | 238876 | 0 | 6  | 0 | 0 | 50 | 69 | 23669372 | 3.06E-01 | 1 |
| AGRP     | 1082466 | 153  | 49  | 335352  | 105732 | 0 | 2  | 0 | 0 | 50 | 61 | 21399872 | 3.06E-01 | 1 |
| EIF2S1   | 484235  | 291  | 32  | 830904  | 210396 | 0 | 4  | 0 | 0 | 50 | 43 | 17771164 | 3.06E-01 | 1 |
| TTC14    | 182757  | 1031 | 2   | 2035608 | 511572 | 0 | 6  | 0 | 0 | 21 | 15 | 9560380  | 3.06E-01 | 1 |
| PHTF1    | 298251  | 398  | 10  | 1991820 | 525456 | 0 | 7  | 1 | 0 | 50 | 52 | 23351464 | 3.06E-01 | 1 |

|         |         |      |     |         |         |   |    |   |   |    |    |          |          |   |
|---------|---------|------|-----|---------|---------|---|----|---|---|----|----|----------|----------|---|
| TEKT5   | 235538  | 242  | -1  | 1245644 | 341404  | 0 | 3  | 0 | 0 | 50 | 43 | 21046364 | 3.07E-01 | 1 |
| MYO9A   | 1084708 | 386  | 22  | 6619820 | 1722328 | 0 | 23 | 3 | 0 | 2  | 4  | 2998588  | 3.07E-01 | 1 |
| DAB2    | 167695  | 374  | -7  | 1965476 | 563548  | 0 | 6  | 1 | 0 | 25 | 23 | 12261708 | 3.07E-01 | 1 |
| NARS2   | 302979  | 569  | 17  | 1247780 | 339268  | 0 | 5  | 0 | 0 | 25 | 29 | 17259236 | 3.07E-01 | 1 |
| PDE4A   | 1956832 | 207  | 38  | 2587764 | 795660  | 0 | 11 | 4 | 0 | 50 | 73 | 23497424 | 3.07E-01 | 1 |
| CCAR1   | 859993  | 256  | 45  | 3028492 | 761840  | 0 | 8  | 1 | 0 | 20 | 19 | 8320432  | 3.07E-01 | 1 |
| TEC     | 253162  | 404  | 42  | 1694560 | 402992  | 0 | 8  | 1 | 0 | 50 | 58 | 19873344 | 3.07E-01 | 1 |
| COG5    | 492317  | 753  | 18  | 2230696 | 619796  | 0 | 11 | 1 | 0 | 50 | 41 | 17036380 | 3.07E-01 | 1 |
| MRPS18B | 2080582 | 271  | 32  | 662160  | 193308  | 0 | 4  | 0 | 0 | 24 | 27 | 11479576 | 3.08E-01 | 1 |
| ASF1A   | 116680  | 856  | 16  | 432896  | 118192  | 0 | 3  | 1 | 0 | 37 | 41 | 12020696 | 3.08E-01 | 1 |
| TEX13A  | 9759    | NaN  | 2   | 1013532 | 310788  | 0 | 3  | 0 | 0 | 22 | 18 | 8716304  | 3.08E-01 | 1 |
| SLAMF9  | 812025  | 365  | 13  | 759704  | 182272  | 0 | 4  | 1 | 0 | 50 | 64 | 17355000 | 3.08E-01 | 1 |
| COL1A1  | 1277832 | 210  | 26  | 3666444 | 1241016 | 0 | 12 | 1 | 0 | 12 | 10 | 5442172  | 3.08E-01 | 1 |
| PTPN21  | 154907  | 686  | -6  | 2982924 | 854400  | 0 | 9  | 3 | 0 | 50 | 67 | 25200172 | 3.08E-01 | 1 |
| EDC3    | 635020  | 206  | 51  | 1290500 | 365968  | 0 | 4  | 1 | 0 | 50 | 57 | 20067008 | 3.08E-01 | 1 |
| CST9    | 189307  | 772  | -47 | 412248  | 104664  | 0 | 1  | 0 | 0 | 50 | 80 | 23329748 | 3.08E-01 | 1 |
| STARD6  | 99256   | 451  | 41  | 582416  | 145960  | 0 | 2  | 0 | 0 | 50 | 80 | 26137876 | 3.08E-01 | 1 |
| ACSL5   | 184750  | 409  | -4  | 1938064 | 518336  | 0 | 6  | 0 | 0 | 40 | 30 | 16363896 | 3.08E-01 | 1 |
| AKT1S1  | 1673246 | 205  | 37  | 627984  | 212532  | 0 | 2  | 1 | 0 | 50 | 63 | 21064520 | 3.08E-01 | 1 |
| CHEK2   | 515703  | 219  | -8  | 1533292 | 411536  | 0 | 7  | 1 | 0 | 50 | 72 | 22733092 | 3.08E-01 | 1 |
| FUBP1   | 373296  | 256  | 1   | 1678184 | 471700  | 0 | 5  | 0 | 0 | 9  | 9  | 5883612  | 3.08E-01 | 1 |
| EPHA6   | 89830   | 1046 | -18 | 3004996 | 816308  | 0 | 13 | 2 | 0 | 50 | 55 | 21079116 | 3.09E-01 | 1 |
| DGKB    | 24487   | 1141 | -13 | 2157716 | 537916  | 0 | 10 | 3 | 0 | 29 | 49 | 17363544 | 3.09E-01 | 1 |
| SLAMF7  | 1188881 | 618  | 29  | 860452  | 243860  | 0 | 5  | 0 | 0 | 50 | 82 | 21947756 | 3.09E-01 | 1 |
| OR4B1   | 400891  | 509  | -27 | 765756  | 226416  | 0 | 6  | 1 | 0 | 50 | 74 | 19622364 | 3.09E-01 | 1 |
| B3GNT2  | 316454  | 412  | 38  | 1009260 | 270204  | 0 | 5  | 1 | 0 | 50 | 68 | 20351808 | 3.09E-01 | 1 |
| MREG    | 925953  | 501  | 19  | 561056  | 144892  | 0 | 4  | 0 | 0 | 50 | 55 | 15772224 | 3.10E-01 | 1 |
| FBXO40  | 289905  | 613  | 25  | 1798868 | 488788  | 0 | 4  | 1 | 0 | 50 | 65 | 25835988 | 3.10E-01 | 1 |
| GLYATL1 | 368006  | 741  | -11 | 877184  | 220720  | 0 | 6  | 0 | 0 | 50 | 59 | 18180920 | 3.10E-01 | 1 |
| SOSTDC1 | 291856  | 699  | -19 | 524388  | 143112  | 0 | 2  | 1 | 0 | 50 | 75 | 20552236 | 3.10E-01 | 1 |
| IBSP    | 423426  | 538  | 1   | 839448  | 205056  | 0 | 4  | 0 | 0 | 50 | 86 | 25028936 | 3.10E-01 | 1 |
| SAP130  | 541058  | 248  | 36  | 2697056 | 861520  | 0 | 10 | 1 | 0 | 3  | 1  | 1569960  | 3.10E-01 | 1 |
| CLPTM1  | 1003719 | 196  | 6   | 1722328 | 482024  | 0 | 8  | 2 | 0 | 50 | 42 | 17116124 | 3.10E-01 | 1 |

|           |         |      |     |         |        |   |   |   |   |    |    |          |          |   |
|-----------|---------|------|-----|---------|--------|---|---|---|---|----|----|----------|----------|---|
| MRPL51    | 2764720 | 179  | 42  | 334284  | 87576  | 0 | 1 | 0 | 0 | 50 | 84 | 25936380 | 3.10E-01 | 1 |
| ARMC7     | 1511891 | 168  | 25  | 490212  | 155928 | 0 | 3 | 0 | 0 | 50 | 53 | 18659384 | 3.11E-01 | 1 |
| PRPF4B    | 182705  | 353  | 18  | 2618024 | 673552 | 0 | 7 | 1 | 0 | 35 | 32 | 11880788 | 3.11E-01 | 1 |
| MCRS1     | 2227486 | 224  | 53  | 1237812 | 355644 | 0 | 7 | 1 | 0 | 50 | 79 | 22778304 | 3.11E-01 | 1 |
| TAS2R50   | 365490  | 676  | -2  | 752584  | 212888 | 0 | 3 | 1 | 0 | 50 | 58 | 17850552 | 3.11E-01 | 1 |
| SPRED1    | 96035   | 704  | -21 | 1164832 | 286580 | 0 | 7 | 1 | 0 | 50 | 79 | 22496708 | 3.11E-01 | 1 |
| ZCCHC13   | 404685  | NaN  | 26  | 417588  | 119616 | 0 | 2 | 0 | 0 | 50 | 58 | 24565068 | 3.11E-01 | 1 |
| NEIL2     | 470737  | 360  | 34  | 850484  | 238876 | 0 | 5 | 0 | 0 | 50 | 50 | 17460376 | 3.11E-01 | 1 |
| GSTA1     | 539666  | 498  | 11  | 591316  | 148808 | 0 | 4 | 0 | 0 | 50 | 73 | 21581432 | 3.11E-01 | 1 |
| AQP2      | 1033911 | 220  | 48  | 653972  | 232468 | 0 | 4 | 1 | 0 | 50 | 62 | 21015036 | 3.11E-01 | 1 |
| CTNNB1    | 720832  | 507  | 48  | 1493776 | 379496 | 0 | 5 | 1 | 0 | 50 | 50 | 22371040 | 3.12E-01 | 1 |
| PRSS1     | 285408  | 636  | 11  | 638664  | 177288 | 0 | 2 | 0 | 0 | 50 | 67 | 24216544 | 3.12E-01 | 1 |
| ITM2B     | 340844  | 457  | 36  | 697760  | 179068 | 0 | 5 | 0 | 0 | 50 | 64 | 19850916 | 3.12E-01 | 1 |
| HLA-F     | 484408  | 755  | 34  | 1131724 | 320756 | 0 | 5 | 0 | 0 | 50 | 51 | 18249272 | 3.12E-01 | 1 |
| AGFG2     | 1651125 | 242  | 60  | 1209688 | 381632 | 0 | 4 | 2 | 0 | 46 | 58 | 16249976 | 3.12E-01 | 1 |
| DNAI2     | 341939  | 427  | -2  | 1590964 | 409400 | 0 | 7 | 2 | 0 | 50 | 59 | 21065232 | 3.12E-01 | 1 |
| NKAIN4    | 1005137 | 285  | 50  | 541120  | 156284 | 0 | 2 | 0 | 0 | 50 | 62 | 19950240 | 3.12E-01 | 1 |
| GOLPH3    | 440207  | 197  | 16  | 752584  | 218228 | 0 | 2 | 0 | 0 | 50 | 50 | 21090864 | 3.12E-01 | 1 |
| MYL5      | 639827  | 489  | 12  | 555004  | 139196 | 0 | 2 | 0 | 0 | 50 | 63 | 18978004 | 3.12E-01 | 1 |
| IIST1H2BI | 227588  | 622  | 29  | 317196  | 96120  | 0 | 4 | 1 | 0 | 14 | 21 | 3578512  | 3.12E-01 | 1 |
| CEBPB     | 598211  | 143  | 41  | 828412  | 280172 | 0 | 2 | 1 | 0 | 50 | 43 | 18237168 | 3.13E-01 | 1 |
| GYPC      | 176465  | 753  | -3  | 334996  | 91136  | 0 | 1 | 1 | 0 | 14 | 10 | 3351384  | 3.13E-01 | 1 |
| AKR7A2    | 810462  | 448  | 40  | 909580  | 271628 | 0 | 3 | 0 | 0 | 40 | 38 | 14129640 | 3.13E-01 | 1 |
| CCDC54    | 101063  | 575  | -12 | 836244  | 220008 | 0 | 5 | 0 | 0 | 50 | 67 | 26164576 | 3.13E-01 | 1 |
| C4orf19   | 124686  | 814  | 32  | 798864  | 218940 | 0 | 4 | 0 | 0 | 50 | 59 | 22922840 | 3.13E-01 | 1 |
| TBX5      | 88840   | 794  | -25 | 1385908 | 380564 | 0 | 8 | 3 | 0 | 26 | 35 | 9107904  | 3.13E-01 | 1 |
| SEMA6B    | 2111443 | 278  | 43  | 2170176 | 744396 | 0 | 9 | 2 | 0 | 50 | 77 | 21475344 | 3.13E-01 | 1 |
| LGR4      | 345497  | 337  | -18 | 2446076 | 676756 | 0 | 6 | 3 | 0 | 50 | 53 | 20888300 | 3.13E-01 | 1 |
| IIST3H2BI | 626588  | 351  | 7   | 314348  | 96832  | 0 | 2 | 1 | 0 | 17 | 22 | 7678564  | 3.13E-01 | 1 |
| WDR93     | 880974  | 190  | 35  | 1801716 | 467784 | 0 | 8 | 1 | 0 | 50 | 61 | 22286312 | 3.13E-01 | 1 |
| PGM5      | 127057  | 681  | -4  | 1440732 | 421860 | 0 | 8 | 3 | 0 | 42 | 58 | 16781128 | 3.13E-01 | 1 |
| HRCT1     | 853975  | 298  | 55  | 276968  | 96832  | 0 | 2 | 0 | 0 | 50 | 61 | 17185188 | 3.14E-01 | 1 |
| ZNF658    | 17308   | 1040 | -46 | 2747964 | 665364 | 0 | 6 | 1 | 0 | 3  | 1  | 2386980  | 3.14E-01 | 1 |

|          |         |      |     |         |         |   |    |   |   |    |    |          |          |   |
|----------|---------|------|-----|---------|---------|---|----|---|---|----|----|----------|----------|---|
| COL12A1  | 359824  | 486  | -8  | 7849800 | 2244936 | 0 | 21 | 5 | 0 | 20 | 20 | 10641196 | 3.14E-01 | 1 |
| POMZP3   | 846738  | 301  | 66  | 494128  | 134924  | 0 | 2  | 1 | 0 | 19 | 29 | 7882908  | 3.14E-01 | 1 |
| KDM3A    | 625501  | 424  | 22  | 3431128 | 911360  | 0 | 13 | 2 | 0 | 31 | 47 | 17987968 | 3.14E-01 | 1 |
| TEAD2    | 2183690 | 309  | 30  | 1145964 | 336420  | 0 | 5  | 2 | 0 | 50 | 56 | 21603148 | 3.14E-01 | 1 |
| LSG1     | 370452  | 255  | 34  | 1725176 | 441796  | 0 | 8  | 0 | 0 | 11 | 16 | 4908528  | 3.14E-01 | 1 |
| AMN      | 758150  | 286  | 50  | 1119976 | 383768  | 0 | 5  | 0 | 0 | 22 | 21 | 8130684  | 3.14E-01 | 1 |
| SERPINB1 | 174293  | 370  | -5  | 1021364 | 267712  | 0 | 4  | 0 | 0 | 50 | 45 | 22271360 | 3.14E-01 | 1 |
| C4orf26  | 461415  | 491  | 19  | 334284  | 91848   | 0 | 2  | 0 | 0 | 50 | 63 | 20447928 | 3.14E-01 | 1 |
| TP53I11  | 131819  | 609  | 16  | 490568  | 143824  | 0 | 2  | 1 | 0 | 18 | 25 | 7064464  | 3.15E-01 | 1 |
| UBE2R2   | 783515  | 187  | 33  | 626204  | 156640  | 0 | 3  | 1 | 0 | 50 | 47 | 19906452 | 3.15E-01 | 1 |
| GALNT3   | 104274  | 888  | -1  | 1648636 | 421148  | 0 | 6  | 0 | 0 | 50 | 52 | 21592112 | 3.15E-01 | 1 |
| FBXO30   | 77282   | 736  | 0   | 1882884 | 515844  | 0 | 6  | 0 | 0 | 45 | 42 | 22653704 | 3.15E-01 | 1 |
| SVOPL    | 256342  | 480  | 9   | 1261664 | 377716  | 0 | 4  | 2 | 0 | 50 | 52 | 20429416 | 3.15E-01 | 1 |
| OR4C46   | 68      | 1239 | -43 | 770740  | 220364  | 0 | 4  | 2 | 0 | 4  | 11 | 3381644  | 3.15E-01 | 1 |
| C11orf73 | 366108  | 283  | 24  | 512996  | 138484  | 0 | 3  | 0 | 0 | 50 | 77 | 26264612 | 3.15E-01 | 1 |
| WBSCR27  | 1099366 | 208  | 37  | 611252  | 198292  | 0 | 2  | 0 | 0 | 50 | 44 | 16326160 | 3.15E-01 | 1 |
| DIP2B    | 736380  | 262  | 49  | 4018884 | 1191888 | 0 | 13 | 2 | 0 | 18 | 14 | 6399812  | 3.15E-01 | 1 |
| PIGO     | 782447  | 350  | 42  | 2649352 | 884660  | 0 | 9  | 2 | 0 | 36 | 48 | 20387764 | 3.16E-01 | 1 |
| OSGEP    | 464497  | 395  | 17  | 863656  | 255608  | 0 | 5  | 0 | 0 | 50 | 58 | 21385632 | 3.16E-01 | 1 |
| SLC39A1  | 2028800 | 222  | 34  | 770384  | 283732  | 0 | 5  | 1 | 0 | 50 | 66 | 18282736 | 3.16E-01 | 1 |
| KIAA1429 | 534075  | 405  | 36  | 4678196 | 1286584 | 0 | 16 | 3 | 0 | 13 | 14 | 5288024  | 3.16E-01 | 1 |
| UPB1     | 546252  | 171  | 51  | 999648  | 272340  | 0 | 5  | 1 | 0 | 50 | 61 | 18447208 | 3.16E-01 | 1 |
| UBE2J1   | 408992  | 574  | 51  | 825920  | 226060  | 0 | 4  | 0 | 0 | 27 | 20 | 8907120  | 3.16E-01 | 1 |
| GRN      | 1062294 | 172  | 38  | 1536140 | 418300  | 0 | 5  | 0 | 0 | 40 | 55 | 20243940 | 3.16E-01 | 1 |
| CCDC14   | 242712  | 450  | 20  | 2331444 | 642936  | 0 | 5  | 0 | 0 | 6  | 1  | 2109300  | 3.16E-01 | 1 |
| RPTN     | 486922  | 468  | 25  | 2054832 | 468852  | 0 | 7  | 2 | 0 | 8  | 13 | 5121772  | 3.16E-01 | 1 |
| LNP1     | 376655  | 410  | 13  | 470276  | 116056  | 0 | 1  | 1 | 0 | 22 | 27 | 9990784  | 3.16E-01 | 1 |
| TADA2A   | 520126  | 171  | 25  | 1283024 | 305092  | 0 | 6  | 0 | 0 | 16 | 14 | 5436832  | 3.16E-01 | 1 |
| DCP2     | 274112  | 439  | 25  | 1126740 | 264864  | 0 | 6  | 1 | 0 | 50 | 56 | 20147464 | 3.17E-01 | 1 |
| PNLDC1   | 652619  | 453  | 26  | 1395876 | 350304  | 0 | 7  | 3 | 0 | 17 | 19 | 6396608  | 3.17E-01 | 1 |
| DDC      | 180088  | 561  | 11  | 1254900 | 346032  | 0 | 4  | 0 | 0 | 50 | 46 | 20520552 | 3.17E-01 | 1 |
| KRT72    | 1280474 | 464  | 36  | 1306876 | 374156  | 0 | 4  | 0 | 0 | 38 | 51 | 16451116 | 3.17E-01 | 1 |
| CDH10    | 30232   | 737  | -29 | 2008552 | 562124  | 0 | 16 | 4 | 0 | 18 | 34 | 6362432  | 3.17E-01 | 1 |

|          |         |      |     |         |        |   |    |   |   |    |     |          |          |   |
|----------|---------|------|-----|---------|--------|---|----|---|---|----|-----|----------|----------|---|
| SIRT7    | 3798594 | 211  | 19  | 1011040 | 314348 | 0 | 3  | 0 | 0 | 34 | 28  | 11428668 | 3.17E-01 | 1 |
| SLC29A2  | 1963418 | 182  | 55  | 1150236 | 360984 | 0 | 6  | 1 | 0 | 50 | 53  | 20984776 | 3.17E-01 | 1 |
| HERC6    | 434791  | 389  | 32  | 2510868 | 646140 | 0 | 8  | 2 | 0 | 24 | 20  | 9249948  | 3.17E-01 | 1 |
| ING5     | 1323203 | 406  | 32  | 646140  | 158064 | 0 | 4  | 1 | 0 | 50 | 66  | 20935292 | 3.17E-01 | 1 |
| ESRRG    | 15599   | 1132 | -28 | 1181920 | 314348 | 0 | 6  | 2 | 0 | 38 | 94  | 20207272 | 3.17E-01 | 1 |
| CLDN25   | 148947  | 534  | 4   | 557496  | 179424 | 0 | 2  | 1 | 0 | 50 | 49  | 17384548 | 3.17E-01 | 1 |
| EOMES    | 165387  | 429  | 1   | 1700612 | 521896 | 0 | 5  | 1 | 0 | 50 | 59  | 21496704 | 3.17E-01 | 1 |
| HNF4A    | 769430  | 376  | 16  | 1364904 | 387684 | 0 | 6  | 2 | 0 | 50 | 63  | 21119700 | 3.17E-01 | 1 |
| C1orf123 | 527317  | 391  | 27  | 443576  | 104308 | 0 | 1  | 0 | 0 | 50 | 64  | 21238960 | 3.17E-01 | 1 |
| BRIX1    | 241905  | 675  | 21  | 947672  | 229264 | 0 | 3  | 0 | 0 | 50 | 44  | 20410904 | 3.17E-01 | 1 |
| SLMAP    | 788284  | 196  | 35  | 2156648 | 530440 | 0 | 5  | 2 | 0 | 50 | 45  | 16343248 | 3.17E-01 | 1 |
| CIR1     | 385177  | 419  | 24  | 1215384 | 270204 | 0 | 5  | 0 | 0 | 50 | 52  | 25814628 | 3.18E-01 | 1 |
| ASTN1    | 6547    | 940  | -9  | 3326820 | 920616 | 0 | 14 | 5 | 0 | 49 | 78  | 25022528 | 3.18E-01 | 1 |
| SMPD4    | 349797  | 593  | 22  | 2207556 | 651480 | 0 | 6  | 3 | 0 | 40 | 41  | 18115772 | 3.18E-01 | 1 |
| PTPRC    | 100900  | 412  | 0   | 3468864 | 858672 | 0 | 15 | 5 | 0 | 15 | 17  | 6258124  | 3.18E-01 | 1 |
| CDK2AP2  | 1392213 | 215  | 53  | 318264  | 101460 | 0 | 2  | 0 | 0 | 50 | 41  | 15455384 | 3.18E-01 | 1 |
| SYCE2    | 1886809 | 335  | 40  | 600928  | 149876 | 0 | 2  | 0 | 0 | 50 | 62  | 18190176 | 3.18E-01 | 1 |
| MPND     | 2122615 | 220  | 27  | 1288008 | 375936 | 0 | 7  | 3 | 0 | 21 | 45  | 12772568 | 3.18E-01 | 1 |
| ENPP5    | 62118   | 819  | 16  | 1224640 | 319688 | 0 | 6  | 0 | 0 | 16 | 11  | 5933808  | 3.18E-01 | 1 |
| TLR5     | 361954  | 297  | -8  | 2153800 | 602708 | 0 | 10 | 1 | 0 | 50 | 55  | 23363924 | 3.18E-01 | 1 |
| HSD3B2   | 409405  | 720  | 3   | 938060  | 269848 | 0 | 5  | 2 | 0 | 39 | 38  | 14123944 | 3.19E-01 | 1 |
| CNTD2    | 1005838 | 400  | 30  | 740836  | 265220 | 0 | 2  | 2 | 0 | 39 | 36  | 14339680 | 3.19E-01 | 1 |
| PTRF     | 2209303 | 160  | 31  | 956572  | 300464 | 0 | 6  | 2 | 0 | 50 | 69  | 23521988 | 3.19E-01 | 1 |
| MCEE     | 355097  | 470  | 40  | 445712  | 134212 | 0 | 1  | 0 | 0 | 50 | 68  | 19843796 | 3.19E-01 | 1 |
| TSPAN12  | 106040  | 717  | 3   | 802780  | 207548 | 0 | 2  | 0 | 0 | 50 | 50  | 21163844 | 3.19E-01 | 1 |
| TMTC4    | 123356  | 622  | 28  | 1953372 | 557496 | 0 | 7  | 1 | 0 | 50 | 33  | 19953088 | 3.19E-01 | 1 |
| C9orf78  | 600401  | 187  | 44  | 776080  | 189392 | 0 | 4  | 0 | 0 | 50 | 71  | 21419808 | 3.19E-01 | 1 |
| PYCRL    | 2183482 | 235  | 37  | 705236  | 237808 | 0 | 3  | 0 | 0 | 50 | 40  | 19636960 | 3.20E-01 | 1 |
| PAFAH1B3 | 792230  | 218  | 42  | 586688  | 182272 | 0 | 3  | 0 | 0 | 50 | 65  | 24510600 | 3.20E-01 | 1 |
| BCL2L11  | NaN     | NaN  | NaN | 620152  | 168032 | 0 | 2  | 0 | 0 | 50 | 116 | 39813616 | 3.20E-01 | 1 |
| COG8     | 1202748 | 125  | 20  | 1508372 | 481312 | 0 | 7  | 2 | 0 | 20 | 22  | 7617688  | 3.20E-01 | 1 |
| ZNF596   | 89938   | 794  | 10  | 1313996 | 325384 | 0 | 4  | 0 | 0 | 31 | 30  | 13788592 | 3.20E-01 | 1 |
| ATP2A1   | 1167826 | 218  | 55  | 2553588 | 758280 | 0 | 11 | 2 | 0 | 7  | 11  | 4186916  | 3.20E-01 | 1 |

|           |         |     |     |         |         |   |    |   |   |    |     |          |          |   |
|-----------|---------|-----|-----|---------|---------|---|----|---|---|----|-----|----------|----------|---|
| EIF2AK2   | 603425  | 281 | 27  | 1467432 | 365256  | 0 | 7  | 1 | 0 | 50 | 57  | 19166684 | 3.20E-01 | 1 |
| GTF3C2    | 1245306 | 182 | 52  | 2301896 | 697048  | 0 | 7  | 1 | 0 | 50 | 41  | 22639464 | 3.20E-01 | 1 |
| CYP4B1    | 658240  | 475 | 8   | 1331796 | 360984  | 0 | 5  | 1 | 0 | 17 | 14  | 6420104  | 3.20E-01 | 1 |
| SPR       | 450159  | 421 | 23  | 631900  | 218228  | 0 | 1  | 0 | 0 | 50 | 54  | 23586068 | 3.20E-01 | 1 |
| ERLEC1    | NaN     | NaN | NaN | 1277684 | 328588  | 0 | 5  | 2 | 0 | 50 | 118 | 39974172 | 3.20E-01 | 1 |
| FOXD4L3   | 118303  | 887 | 1   | 1003564 | 337844  | 0 | 5  | 2 | 0 | 12 | 7   | 3792824  | 3.21E-01 | 1 |
| PSPC1     | 309425  | 481 | 34  | 1343900 | 369172  | 0 | 5  | 0 | 0 | 25 | 23  | 10093668 | 3.21E-01 | 1 |
| HMP19     | 101001  | 533 | 23  | 442508  | 125668  | 0 | 2  | 1 | 0 | 25 | 22  | 10314388 | 3.21E-01 | 1 |
| FNIP2     | 171083  | 428 | 10  | 2849424 | 791388  | 0 | 8  | 0 | 0 | 3  | 0   | 1565688  | 3.21E-01 | 1 |
| AGPS      | 378489  | 434 | 26  | 1736212 | 458528  | 0 | 4  | 2 | 0 | 13 | 9   | 4967624  | 3.21E-01 | 1 |
| ZNF280A   | 201933  | 683 | 23  | 1373092 | 370952  | 0 | 8  | 2 | 0 | 24 | 23  | 9152404  | 3.21E-01 | 1 |
| TSNAX     | 291493  | 439 | 14  | 766824  | 186900  | 0 | 2  | 0 | 0 | 50 | 52  | 20960212 | 3.21E-01 | 1 |
| SPTY2D1   | 637558  | 457 | 28  | 1733008 | 486296  | 0 | 4  | 0 | 0 | 22 | 27  | 10043472 | 3.21E-01 | 1 |
| 34GALNT1  | 496097  | 246 | 32  | 2566048 | 715916  | 0 | 11 | 3 | 0 | 50 | 60  | 19222220 | 3.22E-01 | 1 |
| CASP7     | 200770  | 587 | 0   | 1009972 | 182984  | 0 | 4  | 0 | 0 | 50 | 45  | 20932800 | 3.22E-01 | 1 |
| SPTLC3    | 64005   | 571 | -59 | 1431832 | 386972  | 0 | 8  | 2 | 0 | 29 | 52  | 11801400 | 3.22E-01 | 1 |
| KCNK1     | 135142  | 419 | 12  | 836956  | 251336  | 0 | 3  | 1 | 0 | 50 | 57  | 20671852 | 3.22E-01 | 1 |
| CERKL     | 216512  | 380 | 20  | 1461380 | 387328  | 0 | 7  | 1 | 0 | 50 | 49  | 22354664 | 3.22E-01 | 1 |
| OAF       | 323731  | 198 | 31  | 681028  | 209684  | 0 | 4  | 1 | 0 | 50 | 65  | 22659400 | 3.22E-01 | 1 |
| RAPGEF5   | 747975  | 629 | 4   | 1967256 | 473124  | 0 | 4  | 1 | 0 | 11 | 4   | 3545404  | 3.22E-01 | 1 |
| RAB11FIP1 | 660779  | 379 | 37  | 3158076 | 979356  | 0 | 13 | 3 | 0 | 37 | 49  | 19758712 | 3.22E-01 | 1 |
| HIPK3     | 545645  | 393 | 18  | 3102184 | 862232  | 0 | 12 | 2 | 0 | 23 | 33  | 12329348 | 3.22E-01 | 1 |
| RBM39     | 1401606 | 125 | 51  | 1405488 | 364188  | 0 | 6  | 2 | 0 | 36 | 51  | 16263148 | 3.22E-01 | 1 |
| POLR1D    | 350423  | 583 | 50  | 645428  | 163048  | 0 | 3  | 0 | 0 | 36 | 26  | 11061632 | 3.22E-01 | 1 |
| TRPM1     | 277407  | 497 | 28  | 4142772 | 1107516 | 0 | 13 | 5 | 0 | 17 | 19  | 6628008  | 3.22E-01 | 1 |
| PRKAG1    | 1754222 | 212 | 60  | 878252  | 238876  | 0 | 3  | 0 | 0 | 50 | 67  | 25068096 | 3.23E-01 | 1 |
| OR2S2     | 853975  | 298 | 55  | 783200  | 246352  | 0 | 3  | 1 | 0 | 50 | 61  | 17185188 | 3.23E-01 | 1 |
| ING2      | 204597  | 227 | 15  | 726952  | 177644  | 0 | 4  | 0 | 0 | 50 | 50  | 16885792 | 3.23E-01 | 1 |
| MAN2C1    | 814680  | 296 | 43  | 2660744 | 783556  | 0 | 8  | 1 | 0 | 35 | 47  | 15238224 | 3.23E-01 | 1 |
| CLOCK     | 235221  | 384 | 22  | 2231052 | 568176  | 0 | 5  | 1 | 0 | 19 | 19  | 10446464 | 3.23E-01 | 1 |
| SFRP4     | 100826  | 683 | 10  | 896052  | 237096  | 0 | 3  | 0 | 0 | 50 | 75  | 26634496 | 3.23E-01 | 1 |
| C9orf64   | 460176  | 343 | 2   | 866148  | 242436  | 0 | 4  | 0 | 0 | 20 | 18  | 8075504  | 3.23E-01 | 1 |
| RPL6      | 715909  | 201 | 31  | 741904  | 209684  | 0 | 3  | 1 | 0 | 50 | 39  | 17563260 | 3.23E-01 | 1 |



|           |         |     |     |         |         |   |    |   |   |    |     |          |          |   |
|-----------|---------|-----|-----|---------|---------|---|----|---|---|----|-----|----------|----------|---|
| UPK3A     | 439942  | 277 | 32  | 718052  | 228196  | 0 | 2  | 1 | 0 | 50 | 57  | 21098696 | 3.24E-01 | 1 |
| HINFP     | 1324478 | 195 | 58  | 1355648 | 342472  | 0 | 6  | 2 | 0 | 21 | 32  | 10115740 | 3.24E-01 | 1 |
| LRRC49    | 252612  | 404 | 11  | 1803496 | 461732  | 0 | 7  | 2 | 0 | 50 | 64  | 24196608 | 3.24E-01 | 1 |
| ZCCHC6    | 292716  | 429 | 7   | 3922408 | 981848  | 0 | 18 | 3 | 0 | 39 | 37  | 14366380 | 3.24E-01 | 1 |
| RNF125    | 417722  | 442 | 28  | 605200  | 162692  | 0 | 2  | 1 | 0 | 8  | 6   | 2811332  | 3.25E-01 | 1 |
| ZC3HAV1   | 553735  | 243 | 29  | 2314712 | 631900  | 0 | 8  | 4 | 0 | 12 | 15  | 5440748  | 3.25E-01 | 1 |
| LONRF2    | 94009   | 703 | 5   | 1896768 | 569244  | 0 | 6  | 0 | 0 | 12 | 10  | 5613408  | 3.25E-01 | 1 |
| PXK       | 574675  | 218 | 36  | 1526172 | 403704  | 0 | 5  | 2 | 0 | 50 | 55  | 23421596 | 3.25E-01 | 1 |
| COL13A1   | 591993  | 561 | 26  | 1875052 | 592028  | 0 | 5  | 2 | 0 | 50 | 58  | 22151032 | 3.25E-01 | 1 |
| BPNT1     | 638729  | 613 | -6  | 798508  | 225704  | 0 | 3  | 0 | 0 | 50 | 71  | 21864452 | 3.25E-01 | 1 |
| XRCC6BP1  | 844463  | 298 | 22  | 649344  | 165540  | 0 | 4  | 0 | 0 | 50 | 54  | 20630200 | 3.25E-01 | 1 |
| MRPS28    | 194118  | 410 | 45  | 469564  | 143468  | 0 | 1  | 0 | 0 | 50 | 66  | 23293792 | 3.25E-01 | 1 |
| C14orf177 | 157823  | 938 | -42 | 324672  | 87576   | 0 | 1  | 0 | 0 | 50 | 71  | 16861584 | 3.25E-01 | 1 |
| ZNF224    | 544061  | 558 | -31 | 1857964 | 429692  | 0 | 7  | 0 | 0 | 41 | 40  | 13624120 | 3.25E-01 | 1 |
| SMARCA4   | 1984564 | 190 | 40  | 4327536 | 1214316 | 0 | 19 | 4 | 0 | 39 | 57  | 18397368 | 3.25E-01 | 1 |
| SLC16A3   | 2959536 | 193 | 27  | 1131724 | 378428  | 0 | 2  | 0 | 0 | 30 | 33  | 13425472 | 3.25E-01 | 1 |
| KPNA1     | 413070  | 404 | 34  | 1410116 | 372376  | 0 | 6  | 2 | 0 | 50 | 39  | 17499536 | 3.26E-01 | 1 |
| ABCB10    | 255826  | 277 | 20  | 1817736 | 603420  | 0 | 6  | 0 | 0 | 13 | 14  | 7152396  | 3.26E-01 | 1 |
| PPBP      | 230379  | 408 | 2   | 329300  | 94696   | 0 | 2  | 1 | 0 | 8  | 11  | 4168048  | 3.26E-01 | 1 |
| SH3D19    | 211734  | 335 | 23  | 2011756 | 582416  | 0 | 10 | 1 | 0 | 11 | 13  | 4738716  | 3.26E-01 | 1 |
| LMX1A     | 292562  | 797 | -13 | 998224  | 263084  | 0 | 3  | 0 | 0 | 33 | 35  | 10093312 | 3.26E-01 | 1 |
| TMPRSS15  | 274061  | 981 | -64 | 2689580 | 683164  | 0 | 9  | 0 | 0 | 19 | 13  | 7380592  | 3.26E-01 | 1 |
| KCNA10    | 435777  | 589 | 29  | 1270564 | 372020  | 0 | 5  | 2 | 0 | 23 | 27  | 12775772 | 3.26E-01 | 1 |
| CLDN10    | 228898  | 397 | 50  | 761128  | 222500  | 0 | 2  | 0 | 0 | 18 | 11  | 6442532  | 3.26E-01 | 1 |
| GRIA4     | 86500   | 920 | -22 | 2558572 | 688148  | 0 | 15 | 3 | 0 | 21 | 27  | 8126412  | 3.26E-01 | 1 |
| TGM3      | 555761  | 399 | 27  | 1783916 | 493060  | 0 | 8  | 1 | 0 | 50 | 54  | 22027500 | 3.26E-01 | 1 |
| CUEDC1    | 873797  | 222 | 6   | 995732  | 282664  | 0 | 3  | 2 | 0 | 50 | 66  | 19357500 | 3.26E-01 | 1 |
| C6        | 252021  | 888 | -14 | 2453196 | 615168  | 0 | 10 | 3 | 0 | 50 | 55  | 19252124 | 3.26E-01 | 1 |
| MAPK1IP1  | 837637  | 144 | 39  | 585976  | 215024  | 0 | 1  | 0 | 0 | 50 | 47  | 20764412 | 3.26E-01 | 1 |
| MPP1      | 1741051 | NaN | 3   | 1238524 | 319688  | 0 | 2  | 0 | 0 | 31 | 36  | 14621276 | 3.26E-01 | 1 |
| CHAC2     | NaN     | NaN | NaN | 473480  | 129940  | 0 | 3  | 0 | 0 | 50 | 116 | 39775524 | 3.27E-01 | 1 |
| UPK1B     | 222933  | 588 | 0   | 692420  | 173728  | 0 | 2  | 1 | 0 | 47 | 47  | 17454680 | 3.27E-01 | 1 |
| RLN3      | 1013197 | 231 | 32  | 352796  | 111784  | 0 | 2  | 0 | 0 | 50 | 62  | 21554376 | 3.27E-01 | 1 |

|           |         |      |     |         |         |   |    |   |   |    |    |          |          |   |
|-----------|---------|------|-----|---------|---------|---|----|---|---|----|----|----------|----------|---|
| C1orf95   | 608933  | 509  | 12  | 359916  | 107868  | 0 | 2  | 0 | 0 | 50 | 64 | 22211196 | 3.27E-01 | 1 |
| KRTAP5-8  | 586193  | 626  | 50  | 475616  | 128872  | 0 | 1  | 0 | 0 | 41 | 39 | 13806036 | 3.27E-01 | 1 |
| ACAP3     | 1744013 | 273  | 28  | 2161276 | 614456  | 0 | 9  | 2 | 0 | 9  | 14 | 4108596  | 3.27E-01 | 1 |
| SRBD1     | 73148   | 419  | 28  | 2590612 | 683876  | 0 | 6  | 2 | 0 | 39 | 24 | 15730572 | 3.27E-01 | 1 |
| GZMK      | 221322  | 558  | 1   | 675688  | 192596  | 0 | 2  | 0 | 0 | 50 | 55 | 20812828 | 3.27E-01 | 1 |
| GIMAP8    | 557261  | 584  | 38  | 1689932 | 461020  | 0 | 7  | 2 | 0 | 50 | 72 | 24022168 | 3.27E-01 | 1 |
| DCUN1D4   | 70055   | 766  | 17  | 806340  | 175152  | 0 | 2  | 0 | 0 | 50 | 42 | 19699260 | 3.28E-01 | 1 |
| TRIM68    | 212267  | 935  | -3  | 1244220 | 338556  | 0 | 4  | 2 | 0 | 48 | 67 | 19685376 | 3.28E-01 | 1 |
| ZNF410    | 502038  | 155  | 50  | 1237456 | 339980  | 0 | 3  | 0 | 0 | 50 | 57 | 19811400 | 3.28E-01 | 1 |
| KRTAP19-1 | 14979   | 1035 | -68 | 221788  | 67640   | 0 | 2  | 1 | 0 | 27 | 40 | 7047376  | 3.28E-01 | 1 |
| PRND      | 477570  | 485  | 26  | 448560  | 122820  | 0 | 2  | 0 | 0 | 50 | 50 | 22571824 | 3.28E-01 | 1 |
| RP1L1     | 99570   | 456  | 15  | 5856556 | 1849064 | 0 | 24 | 5 | 0 | 44 | 50 | 17827056 | 3.28E-01 | 1 |
| PPDPF     | 1262904 | 298  | 54  | 295836  | 85440   | 0 | 1  | 1 | 0 | 21 | 30 | 7391984  | 3.28E-01 | 1 |
| DNAJC14   | 1909014 | 256  | 38  | 1758640 | 519404  | 0 | 9  | 0 | 0 | 16 | 13 | 5358156  | 3.28E-01 | 1 |
| C18orf8   | 329604  | 164  | 60  | 1737636 | 453900  | 0 | 6  | 0 | 0 | 23 | 31 | 10604528 | 3.28E-01 | 1 |
| ERC2      | 121781  | 694  | 17  | 2489152 | 637952  | 0 | 13 | 2 | 0 | 50 | 62 | 19951664 | 3.28E-01 | 1 |
| PPP2R3A   | 181711  | 590  | 2   | 3086520 | 795660  | 0 | 13 | 1 | 0 | 23 | 22 | 10027808 | 3.28E-01 | 1 |
| C2orf43   | 491470  | 393  | 16  | 851552  | 218584  | 0 | 5  | 0 | 0 | 50 | 66 | 21261032 | 3.28E-01 | 1 |
| BANF1     | 3854361 | 208  | 57  | 232824  | 64080   | 0 | 1  | 0 | 0 | 50 | 60 | 21621304 | 3.28E-01 | 1 |
| TREML4    | 249047  | 607  | 38  | 517624  | 147740  | 0 | 1  | 0 | 0 | 50 | 46 | 16839512 | 3.29E-01 | 1 |
| CRYGD     | 327858  | 440  | 13  | 452120  | 119260  | 0 | 1  | 0 | 0 | 50 | 63 | 21332232 | 3.29E-01 | 1 |
| TMED9     | 1316033 | 475  | 42  | 603420  | 171948  | 0 | 1  | 0 | 0 | 25 | 32 | 14321524 | 3.29E-01 | 1 |
| NAA10     | 2341816 | NaN  | 26  | 627272  | 160912  | 0 | 3  | 0 | 0 | 50 | 75 | 29231160 | 3.29E-01 | 1 |
| CYP27A1   | 1077853 | 296  | 40  | 1339272 | 399432  | 0 | 5  | 3 | 0 | 35 | 64 | 16686788 | 3.29E-01 | 1 |
| SHKBP1    | 820124  | 226  | 40  | 1788188 | 555004  | 0 | 7  | 2 | 0 | 50 | 54 | 21183780 | 3.29E-01 | 1 |
| CHRND     | 279084  | 156  | 34  | 1322540 | 386260  | 0 | 8  | 2 | 0 | 50 | 73 | 20747324 | 3.29E-01 | 1 |
| GCNT1     | 107632  | 603  | -2  | 1087936 | 286580  | 0 | 5  | 0 | 0 | 11 | 15 | 5511236  | 3.29E-01 | 1 |
| EXT1      | 190467  | 586  | 18  | 1926316 | 509792  | 0 | 8  | 4 | 0 | 18 | 15 | 5204720  | 3.29E-01 | 1 |
| MEM151A   | 2133752 | 236  | 53  | 1118908 | 388040  | 0 | 6  | 1 | 0 | 50 | 77 | 24481764 | 3.30E-01 | 1 |
| RBM14     | 1343990 | 194  | 62  | 1598796 | 556428  | 0 | 8  | 0 | 0 | 13 | 11 | 5250288  | 3.30E-01 | 1 |
| HMGCS1    | 504216  | 449  | 20  | 1342120 | 365612  | 0 | 7  | 2 | 0 | 50 | 48 | 17318332 | 3.30E-01 | 1 |
| VEZF1     | 854628  | 182  | 27  | 1317912 | 375936  | 0 | 5  | 0 | 0 | 40 | 38 | 14872256 | 3.30E-01 | 1 |
| SBDS      | 485411  | 355  | 34  | 655040  | 166252  | 0 | 5  | 2 | 0 | 25 | 28 | 9221468  | 3.30E-01 | 1 |

|          |         |     |     |         |         |   |    |   |   |    |    |          |          |   |
|----------|---------|-----|-----|---------|---------|---|----|---|---|----|----|----------|----------|---|
| KCTD17   | 699535  | 379 | 44  | 770028  | 215736  | 0 | 4  | 1 | 0 | 50 | 63 | 26596760 | 3.30E-01 | 1 |
| CEP70    | 198996  | 515 | 16  | 1615528 | 368816  | 0 | 5  | 2 | 0 | 50 | 61 | 20383492 | 3.30E-01 | 1 |
| ZNF558   | 560313  | 537 | -60 | 1050556 | 262016  | 0 | 5  | 0 | 0 | 2  | 43 | 12280576 | 3.30E-01 | 1 |
| CLTC     | 1083057 | 398 | 23  | 4358152 | 1144184 | 0 | 17 | 1 | 0 | 2  | 5  | 3049140  | 3.30E-01 | 1 |
| SERPINA1 | 278548  | 858 | 13  | 1061236 | 287648  | 0 | 7  | 3 | 0 | 42 | 49 | 13225400 | 3.30E-01 | 1 |
| ATP6V1B1 | 504483  | 623 | 25  | 1327880 | 376648  | 0 | 6  | 3 | 0 | 14 | 10 | 3081892  | 3.30E-01 | 1 |
| APBB3    | 706371  | 319 | 29  | 1258460 | 371308  | 0 | 3  | 2 | 0 | 42 | 35 | 18761200 | 3.30E-01 | 1 |
| H2BFWT   | 439642  | NaN | 30  | 433964  | 140620  | 0 | 1  | 0 | 0 | 50 | 63 | 20255688 | 3.30E-01 | 1 |
| QRFP     | 727815  | 241 | 22  | 327520  | 110360  | 0 | 2  | 0 | 0 | 50 | 66 | 20777940 | 3.31E-01 | 1 |
| ESX1     | 354255  | NaN | 47  | 993596  | 325384  | 0 | 6  | 0 | 0 | 50 | 58 | 20023576 | 3.31E-01 | 1 |
| PAQR3    | 170032  | 699 | 18  | 803848  | 217160  | 0 | 3  | 0 | 0 | 50 | 57 | 17489568 | 3.31E-01 | 1 |
| CSR2BP   | 782027  | 479 | -6  | 1998584 | 548596  | 0 | 8  | 4 | 0 | 45 | 53 | 14371008 | 3.31E-01 | 1 |
| PEX2     | 66156   | 757 | 2   | 777148  | 207548  | 0 | 1  | 0 | 0 | 50 | 41 | 21510944 | 3.31E-01 | 1 |
| TPRG1L   | 250027  | 288 | 16  | 686012  | 207904  | 0 | 2  | 1 | 0 | 50 | 45 | 18928876 | 3.31E-01 | 1 |
| USH1G    | 1045089 | 223 | 25  | 1130656 | 358136  | 0 | 5  | 2 | 0 | 50 | 66 | 19891500 | 3.31E-01 | 1 |
| NKAPL    | 273319  | 502 | 35  | 1022788 | 270560  | 0 | 7  | 2 | 0 | 38 | 40 | 12254588 | 3.31E-01 | 1 |
| EXOSC9   | 324357  | 506 | 29  | 1200432 | 315060  | 0 | 7  | 1 | 0 | 42 | 48 | 16152432 | 3.31E-01 | 1 |
| COX17    | 288657  | 595 | 42  | 172304  | 43432   | 0 | 1  | 0 | 0 | 50 | 57 | 18639092 | 3.32E-01 | 1 |
| PDGFC    | 39685   | 595 | -24 | 889288  | 240656  | 0 | 4  | 1 | 0 | 50 | 66 | 19440448 | 3.32E-01 | 1 |
| ARHGFB3  | 609620  | 185 | 37  | 1708800 | 508368  | 0 | 6  | 2 | 0 | 50 | 49 | 20150668 | 3.32E-01 | 1 |
| RABL2B   | 266017  | 295 | 32  | 654684  | 152724  | 0 | 2  | 0 | 0 | 50 | 60 | 20376016 | 3.32E-01 | 1 |
| KRT20    | 1036346 | 358 | 5   | 1093988 | 299752  | 0 | 7  | 2 | 0 | 50 | 61 | 13481008 | 3.32E-01 | 1 |
| MIA3     | 225124  | 392 | -1  | 4943772 | 1286940 | 0 | 12 | 1 | 0 | 29 | 26 | 13495604 | 3.33E-01 | 1 |
| GPAT2    | 792288  | 366 | 33  | 2010688 | 629408  | 0 | 5  | 1 | 0 | 50 | 53 | 22171324 | 3.33E-01 | 1 |
| BEST1    | 2389859 | 185 | 53  | 1709868 | 481668  | 0 | 3  | 0 | 0 | 7  | 1  | 2498052  | 3.33E-01 | 1 |
| YPEL5    | 141747  | 692 | 18  | 310788  | 88644   | 0 | 2  | 0 | 0 | 50 | 61 | 18526240 | 3.33E-01 | 1 |
| MTNR1A   | 351103  | 675 | -26 | 868996  | 264152  | 0 | 5  | 1 | 0 | 50 | 78 | 22212976 | 3.33E-01 | 1 |
| ALAD     | 390186  | 297 | 36  | 859028  | 248488  | 0 | 4  | 1 | 0 | 50 | 42 | 19391676 | 3.33E-01 | 1 |
| ARAP3    | 771583  | 353 | 25  | 3885740 | 1201144 | 0 | 8  | 4 | 0 | 50 | 53 | 22992260 | 3.33E-01 | 1 |
| DPM3     | 1801444 | 194 | 32  | 294768  | 103596  | 0 | 1  | 0 | 0 | 50 | 85 | 19936000 | 3.33E-01 | 1 |
| PPP1R16B | 264783  | 548 | 32  | 1453192 | 408332  | 0 | 6  | 1 | 0 | 50 | 59 | 20456472 | 3.33E-01 | 1 |
| HLA-DPA1 | 1479000 | 431 | 28  | 665364  | 190104  | 0 | 5  | 0 | 0 | 50 | 69 | 17902884 | 3.33E-01 | 1 |
| ANGPT1   | 50022   | 671 | -19 | 1318980 | 313992  | 0 | 4  | 1 | 0 | 50 | 81 | 23751252 | 3.33E-01 | 1 |

|          |         |      |     |         |         |   |    |   |   |    |     |          |          |   |
|----------|---------|------|-----|---------|---------|---|----|---|---|----|-----|----------|----------|---|
| CRX      | 881316  | 336  | 39  | 736564  | 237452  | 0 | 4  | 0 | 0 | 2  | 0   | 778928   | 3.34E-01 | 1 |
| TROAP    | 2137968 | 175  | 37  | 2002856 | 659668  | 0 | 10 | 1 | 0 | 9  | 15  | 4736936  | 3.34E-01 | 1 |
| ZNF493   | 166321  | 1140 | -56 | 2062308 | 498756  | 0 | 10 | 1 | 0 | 49 | 66  | 19365688 | 3.34E-01 | 1 |
| MST1R    | 1289886 | 170  | 38  | 3449284 | 1120688 | 0 | 16 | 8 | 0 | 11 | 20  | 5670724  | 3.34E-01 | 1 |
| FAM160B1 | 208967  | 183  | 16  | 2009264 | 542188  | 0 | 9  | 1 | 0 | 5  | 3   | 1525460  | 3.34E-01 | 1 |
| C11orf57 | 389805  | 179  | 31  | 783556  | 179780  | 0 | 3  | 1 | 0 | 37 | 39  | 12636576 | 3.34E-01 | 1 |
| POU6F2   | 180662  | 897  | 4   | 1723396 | 536492  | 0 | 6  | 3 | 0 | 50 | 60  | 18744112 | 3.34E-01 | 1 |
| PWWP2B   | 152612  | 271  | -1  | 1435748 | 485584  | 0 | 6  | 0 | 0 | 7  | 7   | 3771464  | 3.34E-01 | 1 |
| FAM134A  | 773232  | 177  | 36  | 1338204 | 438948  | 0 | 7  | 0 | 0 | 12 | 9   | 4375240  | 3.34E-01 | 1 |
| LRGUK    | 239801  | 634  | 8   | 2163412 | 566396  | 0 | 7  | 3 | 0 | 26 | 34  | 10889684 | 3.35E-01 | 1 |
| KPNA5    | 244987  | 581  | 14  | 1426848 | 363120  | 0 | 5  | 2 | 0 | 48 | 65  | 18929944 | 3.35E-01 | 1 |
| C15orf41 | 74456   | 598  | -16 | 761840  | 188680  | 0 | 2  | 0 | 0 | 50 | 61  | 22792188 | 3.35E-01 | 1 |
| ALG1L2   | NaN     | NaN  | NaN | 563904  | 158064  | 0 | 3  | 1 | 0 | 50 | 117 | 39803648 | 3.35E-01 | 1 |
| E2F6     | 342110  | 196  | 26  | 733004  | 196156  | 0 | 2  | 0 | 0 | 50 | 62  | 26104412 | 3.35E-01 | 1 |
| TXLNB    | 192994  | 504  | 14  | 1767184 | 466004  | 0 | 5  | 0 | 0 | 17 | 17  | 7303696  | 3.35E-01 | 1 |
| KCTD10   | 434920  | 420  | 38  | 808120  | 225704  | 0 | 5  | 0 | 0 | 50 | 68  | 22062744 | 3.35E-01 | 1 |
| SCYL3    | 181109  | 624  | 5   | 1908872 | 527236  | 0 | 9  | 2 | 0 | 13 | 9   | 4214684  | 3.35E-01 | 1 |
| DRGX     | NaN     | NaN  | NaN | 680316  | 201852  | 0 | 2  | 0 | 0 | 50 | 116 | 39847436 | 3.35E-01 | 1 |
| ZNF595   | NaN     | NaN  | NaN | 1644008 | 445000  | 0 | 9  | 0 | 0 | 50 | 116 | 40090584 | 3.36E-01 | 1 |
| RDH10    | 259225  | 340  | 19  | 867572  | 249556  | 0 | 4  | 1 | 0 | 50 | 53  | 22172392 | 3.36E-01 | 1 |
| MRPL30   | 489016  | 633  | 27  | 430048  | 110360  | 0 | 2  | 0 | 0 | 50 | 52  | 21570752 | 3.36E-01 | 1 |
| WARS     | 410981  | 215  | 34  | 1239592 | 315416  | 0 | 4  | 1 | 0 | 47 | 43  | 17641580 | 3.36E-01 | 1 |
| PSG1     | 394104  | 283  | -23 | 1106092 | 315416  | 0 | 5  | 0 | 0 | 50 | 79  | 23984076 | 3.36E-01 | 1 |
| RFC2     | 997452  | 202  | 51  | 930228  | 252048  | 0 | 4  | 0 | 0 | 17 | 16  | 5434696  | 3.36E-01 | 1 |
| P2RX2    | 819418  | 332  | 35  | 1291924 | 342116  | 0 | 6  | 0 | 0 | 44 | 63  | 20559712 | 3.36E-01 | 1 |
| RPP40    | 119393  | 391  | 24  | 957640  | 242792  | 0 | 3  | 0 | 0 | 15 | 7   | 6717008  | 3.36E-01 | 1 |
| CAPZA1   | 560292  | 325  | 23  | 774300  | 183696  | 0 | 3  | 0 | 0 | 50 | 45  | 22664384 | 3.36E-01 | 1 |
| PLCXD3   | 219266  | 928  | -15 | 823428  | 218940  | 0 | 4  | 2 | 0 | 45 | 53  | 14228252 | 3.36E-01 | 1 |
| TPP2     | 195408  | 521  | 20  | 3252772 | 872912  | 0 | 16 | 4 | 0 | 24 | 23  | 8781452  | 3.36E-01 | 1 |
| CDK7     | 423022  | 261  | 47  | 918836  | 239944  | 0 | 4  | 0 | 0 | 50 | 52  | 19542976 | 3.36E-01 | 1 |
| MTRF1L   | 159618  | 677  | -1  | 975796  | 270560  | 0 | 2  | 0 | 0 | 50 | 65  | 20954516 | 3.36E-01 | 1 |
| LZTFL1   | 252915  | 426  | 42  | 803848  | 195800  | 0 | 3  | 1 | 0 | 50 | 70  | 22768692 | 3.37E-01 | 1 |
| C11orf24 | 833157  | 233  | 52  | 1083308 | 367036  | 0 | 7  | 0 | 0 | 50 | 61  | 19015740 | 3.37E-01 | 1 |

|           |         |      |     |         |         |   |    |   |   |    |    |          |          |   |
|-----------|---------|------|-----|---------|---------|---|----|---|---|----|----|----------|----------|---|
| TYR       | 28803   | 973  | -28 | 1360632 | 356712  | 0 | 8  | 1 | 0 | 50 | 89 | 23440108 | 3.37E-01 | 1 |
| FAM46A    | 121389  | 396  | -18 | 1112856 | 315060  | 0 | 4  | 0 | 0 | 50 | 35 | 19326172 | 3.37E-01 | 1 |
| TMOD1     | 523548  | 420  | 35  | 940908  | 250980  | 0 | 3  | 0 | 0 | 50 | 62 | 22763352 | 3.37E-01 | 1 |
| ZCCHC3    | 1010597 | 348  | 24  | 983628  | 316128  | 0 | 7  | 3 | 0 | 9  | 7  | 2560352  | 3.37E-01 | 1 |
| PFN4      | 269570  | 385  | 38  | 340336  | 93272   | 0 | 1  | 1 | 0 | 14 | 14 | 3955872  | 3.37E-01 | 1 |
| TRPV5     | 294033  | 676  | 2   | 1857964 | 542900  | 0 | 7  | 1 | 0 | 49 | 57 | 17327232 | 3.37E-01 | 1 |
| HTRA2     | 1019591 | 315  | 50  | 1103956 | 396584  | 0 | 6  | 3 | 0 | 39 | 63 | 16896116 | 3.37E-01 | 1 |
| KLC3      | 1280459 | 215  | 23  | 1269852 | 401568  | 0 | 4  | 1 | 0 | 50 | 68 | 21192680 | 3.37E-01 | 1 |
| TAX1BP1   | 393690  | 180  | 16  | 2101824 | 497688  | 0 | 7  | 2 | 0 | 50 | 45 | 22689660 | 3.37E-01 | 1 |
| MXD1      | 844060  | 221  | 37  | 585264  | 147384  | 0 | 3  | 0 | 0 | 50 | 49 | 17507368 | 3.37E-01 | 1 |
| ZRANB3    | 542328  | 676  | 16  | 2821300 | 724460  | 0 | 9  | 2 | 0 | 41 | 42 | 16635880 | 3.37E-01 | 1 |
| EGF       | 215298  | 503  | 9   | 3148108 | 820580  | 0 | 13 | 5 | 0 | 31 | 39 | 14122164 | 3.38E-01 | 1 |
| SERPINA10 | 203903  | 744  | -1  | 1129588 | 313280  | 0 | 3  | 1 | 0 | 50 | 44 | 20062024 | 3.38E-01 | 1 |
| EFCAB3    | 344431  | 362  | 8   | 1309368 | 312924  | 0 | 4  | 0 | 0 | 50 | 49 | 21352168 | 3.38E-01 | 1 |
| PCDH9     | 19605   | 831  | -11 | 3089368 | 890000  | 0 | 18 | 5 | 0 | 29 | 44 | 15021064 | 3.38E-01 | 1 |
| HLCS      | 425948  | 486  | 61  | 1837672 | 525812  | 0 | 11 | 2 | 0 | 7  | 10 | 3456048  | 3.38E-01 | 1 |
| ARHGAP5   | 153921  | 392  | 1   | 3840172 | 996800  | 0 | 11 | 2 | 0 | 49 | 51 | 24381372 | 3.38E-01 | 1 |
| PGPEP1    | 1294357 | 210  | 39  | 542188  | 149876  | 0 | 3  | 0 | 0 | 50 | 67 | 22067728 | 3.38E-01 | 1 |
| LPP       | 148376  | 685  | 6   | 1537208 | 465292  | 0 | 7  | 1 | 0 | 50 | 64 | 25941008 | 3.38E-01 | 1 |
| OCIAD2    | 256817  | 372  | 61  | 427556  | 96832   | 0 | 1  | 0 | 0 | 50 | 65 | 20959856 | 3.38E-01 | 1 |
| DMRTB1    | 552240  | 385  | 25  | 834108  | 279816  | 0 | 4  | 2 | 0 | 17 | 18 | 7503768  | 3.38E-01 | 1 |
| DEFB114   | 70183   | 1258 | -7  | 186900  | 40584   | 0 | 1  | 0 | 0 | 50 | 45 | 19480676 | 3.38E-01 | 1 |
| ZNF207    | 679038  | 286  | 30  | 1271632 | 361340  | 0 | 5  | 0 | 0 | 23 | 20 | 9499860  | 3.38E-01 | 1 |
| NHLRC1    | 487819  | 397  | -1  | 951588  | 319332  | 0 | 5  | 1 | 0 | 50 | 54 | 19544044 | 3.38E-01 | 1 |
| IL17A     | 313277  | 556  | 11  | 391244  | 119260  | 0 | 2  | 1 | 0 | 45 | 48 | 18141048 | 3.38E-01 | 1 |
| USPL1     | 373046  | 369  | 63  | 2776800 | 759348  | 0 | 11 | 2 | 0 | 50 | 59 | 20908236 | 3.39E-01 | 1 |
| GNB4      | 405715  | 600  | 20  | 895340  | 235672  | 0 | 4  | 2 | 0 | 44 | 47 | 14078732 | 3.39E-01 | 1 |
| TPMT      | 487819  | 397  | -1  | 664296  | 158064  | 0 | 2  | 0 | 0 | 50 | 54 | 19544044 | 3.39E-01 | 1 |
| KCNMB1    | 55692   | 614  | 41  | 485228  | 142756  | 0 | 3  | 0 | 0 | 50 | 44 | 16236448 | 3.39E-01 | 1 |
| TPR       | 271754  | 338  | -19 | 6197248 | 1592744 | 0 | 23 | 4 | 0 | 29 | 35 | 14089412 | 3.39E-01 | 1 |
| PQLC1     | 361911  | 444  | 7   | 693844  | 199004  | 0 | 2  | 1 | 0 | 50 | 48 | 18275616 | 3.39E-01 | 1 |
| OR52I2    | 212267  | 935  | -3  | 863656  | 265220  | 0 | 3  | 0 | 0 | 50 | 68 | 21342556 | 3.39E-01 | 1 |
| ZIK1      | 495857  | 828  | -34 | 1252408 | 326096  | 0 | 8  | 0 | 0 | 31 | 36 | 11096164 | 3.39E-01 | 1 |

|          |         |      |     |         |         |   |    |   |   |    |     |          |          |   |
|----------|---------|------|-----|---------|---------|---|----|---|---|----|-----|----------|----------|---|
| MSH4     | 146770  | 535  | -10 | 2436464 | 648988  | 0 | 9  | 1 | 0 | 11 | 19  | 6012840  | 3.39E-01 | 1 |
| CRISP1   | 70111   | 1258 | -4  | 672840  | 158064  | 0 | 3  | 0 | 0 | 50 | 41  | 17359984 | 3.40E-01 | 1 |
| DDX26B   | 236195  | NaN  | 25  | 2220016 | 610184  | 0 | 9  | 1 | 0 | 15 | 32  | 11175552 | 3.40E-01 | 1 |
| ZNF99    | 83716   | 1439 | -72 | 2726248 | 624068  | 0 | 14 | 2 | 0 | 13 | 18  | 5386280  | 3.40E-01 | 1 |
| UNC13C   | 17740   | 1075 | -30 | 5760436 | 1464584 | 0 | 19 | 2 | 0 | 1  | 2   | 1963696  | 3.40E-01 | 1 |
| CASP9    | 636573  | 188  | 34  | 1061592 | 310788  | 0 | 4  | 1 | 0 | 50 | 60  | 20520196 | 3.40E-01 | 1 |
| OR5AP2   | NaN     | NaN  | NaN | 790320  | 225348  | 0 | 4  | 1 | 0 | 50 | 117 | 39870932 | 3.40E-01 | 1 |
| IL6      | 948251  | 304  | 14  | 547172  | 152368  | 0 | 4  | 0 | 0 | 50 | 72  | 20119696 | 3.40E-01 | 1 |
| ICAM3    | 1802015 | 191  | 21  | 1354224 | 431472  | 0 | 4  | 0 | 0 | 11 | 17  | 6150612  | 3.40E-01 | 1 |
| MIDN     | 2214581 | 234  | 29  | 1140980 | 387328  | 0 | 3  | 1 | 0 | 50 | 68  | 20485664 | 3.40E-01 | 1 |
| CEP192   | 326004  | 417  | 52  | 6527972 | 1791748 | 0 | 20 | 7 | 0 | 49 | 61  | 22900056 | 3.40E-01 | 1 |
| STAG3L4  | 349765  | 556  | 55  | 397652  | 103240  | 0 | 1  | 0 | 0 | 50 | 50  | 14609172 | 3.41E-01 | 1 |
| SNTN     | 155962  | 905  | -12 | 387328  | 101816  | 0 | 2  | 0 | 0 | 50 | 65  | 25062756 | 3.41E-01 | 1 |
| HOMER    | 1171456 | 330  | 20  | 1361344 | 408332  | 0 | 6  | 1 | 0 | 50 | 49  | 21656192 | 3.41E-01 | 1 |
| ZNF148   | 377619  | 174  | 43  | 2043084 | 529728  | 0 | 9  | 0 | 0 | 19 | 18  | 7066244  | 3.41E-01 | 1 |
| LRRC14   | 1755818 | 291  | 7   | 1181920 | 409400  | 0 | 4  | 0 | 0 | 13 | 17  | 7333956  | 3.41E-01 | 1 |
| LARS     | 396074  | 366  | 11  | 3126748 | 776792  | 0 | 10 | 1 | 0 | 16 | 21  | 10013568 | 3.41E-01 | 1 |
| KLHDC8B  | 1812695 | 203  | 45  | 864368  | 290140  | 0 | 6  | 1 | 0 | 50 | 80  | 19955580 | 3.41E-01 | 1 |
| RLN2     | 385172  | 605  | 16  | 567464  | 144892  | 0 | 1  | 0 | 0 | 50 | 50  | 21817816 | 3.42E-01 | 1 |
| ZNF737   | NaN     | NaN  | NaN | 1390892 | 342472  | 0 | 8  | 3 | 0 | 26 | 43  | 11919592 | 3.42E-01 | 1 |
| PHKG1    | 738325  | 642  | 4   | 1006768 | 276968  | 0 | 3  | 0 | 0 | 18 | 12  | 6589560  | 3.42E-01 | 1 |
| SLCO1A2  | 481259  | 873  | -33 | 1751520 | 458172  | 0 | 9  | 2 | 0 | 50 | 57  | 17101172 | 3.42E-01 | 1 |
| TIMP4    | 348401  | 238  | 23  | 582772  | 155216  | 0 | 2  | 1 | 0 | 6  | 4   | 3576020  | 3.42E-01 | 1 |
| C2CD3    | 561035  | 225  | 45  | 4994680 | 1426136 | 0 | 16 | 1 | 0 | 4  | 2   | 2649708  | 3.42E-01 | 1 |
| UTP11L   | 445132  | 232  | 42  | 678180  | 167676  | 0 | 1  | 0 | 0 | 50 | 34  | 17924600 | 3.43E-01 | 1 |
| C16orf72 | 401555  | 253  | 7   | 696692  | 200428  | 0 | 2  | 0 | 0 | 50 | 74  | 26834212 | 3.43E-01 | 1 |
| ASNSD1   | 418427  | 511  | 16  | 1620512 | 455680  | 0 | 6  | 1 | 0 | 50 | 64  | 23586780 | 3.43E-01 | 1 |
| ST8SIA3  | 298355  | 599  | 9   | 971524  | 262016  | 0 | 3  | 0 | 0 | 50 | 58  | 22855200 | 3.43E-01 | 1 |
| DCAF13   | 430771  | 673  | 28  | 1577436 | 433608  | 0 | 7  | 1 | 0 | 11 | 7   | 4066588  | 3.43E-01 | 1 |
| CMKLR1   | 437015  | 597  | 27  | 936992  | 269848  | 0 | 4  | 1 | 0 | 22 | 26  | 11070888 | 3.43E-01 | 1 |
| HLF      | 147479  | 526  | -54 | 749736  | 211464  | 0 | 4  | 1 | 0 | 50 | 71  | 16849124 | 3.43E-01 | 1 |
| SGIP1    | 116994  | 601  | -8  | 2146680 | 611964  | 0 | 8  | 3 | 0 | 50 | 55  | 19777936 | 3.43E-01 | 1 |
| PLEKHF2  | 385365  | 347  | 60  | 634748  | 170524  | 0 | 3  | 1 | 0 | 50 | 53  | 18794664 | 3.44E-01 | 1 |

|           |         |     |     |         |         |   |    |   |   |    |    |          |          |   |
|-----------|---------|-----|-----|---------|---------|---|----|---|---|----|----|----------|----------|---|
| GSTK1     | 379894  | 399 | 14  | 724816  | 209684  | 0 | 2  | 0 | 0 | 50 | 67 | 22890088 | 3.44E-01 | 1 |
| GPR101    | 252008  | NaN | 13  | 1269140 | 360628  | 0 | 6  | 1 | 0 | 50 | 69 | 25151756 | 3.44E-01 | 1 |
| ANKLE2    | 779125  | 601 | 32  | 2370604 | 691352  | 0 | 9  | 3 | 0 | 50 | 68 | 23731672 | 3.44E-01 | 1 |
| FAM193A   | 637151  | 209 | 46  | 3151312 | 846212  | 0 | 16 | 6 | 0 | 8  | 16 | 4645800  | 3.44E-01 | 1 |
| PABPC4    | 978867  | 358 | 29  | 1710224 | 471700  | 0 | 8  | 2 | 0 | 50 | 47 | 19090144 | 3.44E-01 | 1 |
| CD7       | 2856070 | 193 | 24  | 579212  | 205768  | 0 | 3  | 0 | 0 | 50 | 47 | 19854120 | 3.44E-01 | 1 |
| FUZ       | 1673246 | 205 | 37  | 1034180 | 353152  | 0 | 6  | 2 | 0 | 13 | 23 | 7061972  | 3.44E-01 | 1 |
| EIF4H     | 1022182 | 190 | 51  | 648632  | 176932  | 0 | 3  | 2 | 0 | 10 | 13 | 2780716  | 3.44E-01 | 1 |
| ALDH18A1  | 369001  | 454 | 26  | 2036676 | 586332  | 0 | 4  | 1 | 0 | 7  | 4  | 3529384  | 3.44E-01 | 1 |
| EHMT2     | 2485614 | 188 | 36  | 3090436 | 907088  | 0 | 11 | 3 | 0 | 43 | 37 | 17295904 | 3.44E-01 | 1 |
| GADD45G   | 163029  | 568 | 52  | 408688  | 116768  | 0 | 1  | 1 | 0 | 10 | 12 | 4245656  | 3.44E-01 | 1 |
| CEMP1     | 2085452 | 321 | 49  | 686012  | 188680  | 0 | 3  | 0 | 0 | 50 | 76 | 21050280 | 3.44E-01 | 1 |
| TBC1D4    | 196931  | 480 | 17  | 3335720 | 911716  | 0 | 12 | 6 | 0 | 25 | 23 | 8441828  | 3.44E-01 | 1 |
| VAT1      | 1507064 | 201 | 26  | 974016  | 309720  | 0 | 3  | 0 | 0 | 22 | 18 | 8144924  | 3.44E-01 | 1 |
| YWHAZ     | 1074893 | 213 | 50  | 648988  | 160556  | 0 | 4  | 1 | 0 | 50 | 63 | 18970884 | 3.44E-01 | 1 |
| TULP3     | 494496  | 336 | 35  | 1318624 | 358136  | 0 | 6  | 0 | 0 | 50 | 57 | 21192324 | 3.44E-01 | 1 |
| PDCD1     | 559742  | 487 | 29  | 717340  | 227840  | 0 | 3  | 1 | 0 | 30 | 65 | 17928160 | 3.45E-01 | 1 |
| SPRY2     | 44501   | 729 | 60  | 783912  | 232824  | 0 | 4  | 1 | 0 | 50 | 47 | 20026780 | 3.45E-01 | 1 |
| CSRP2     | 182028  | 705 | -11 | 511928  | 129940  | 0 | 2  | 0 | 0 | 50 | 57 | 27619548 | 3.45E-01 | 1 |
| KHDRBS1   | 1216050 | 133 | 33  | 1111432 | 345320  | 0 | 9  | 0 | 0 | 9  | 9  | 2859036  | 3.45E-01 | 1 |
| CNOT10    | 464002  | 493 | 28  | 1967968 | 495908  | 0 | 5  | 0 | 0 | 21 | 13 | 8184796  | 3.45E-01 | 1 |
| FST       | 202521  | 488 | -5  | 903172  | 232112  | 0 | 3  | 1 | 0 | 11 | 8  | 3569256  | 3.45E-01 | 1 |
| HDAC1     | 1427362 | 210 | 43  | 1294060 | 311144  | 0 | 4  | 1 | 0 | 50 | 69 | 25771552 | 3.45E-01 | 1 |
| ERLIN2    | 619400  | 326 | 9   | 938416  | 237452  | 0 | 3  | 0 | 0 | 50 | 74 | 28852376 | 3.45E-01 | 1 |
| PEX13     | 635177  | 350 | 33  | 1008904 | 300464  | 0 | 2  | 0 | 0 | 19 | 19 | 12566444 | 3.45E-01 | 1 |
| C5orf56   | 543074  | 264 | 63  | 338912  | 80812   | 0 | 2  | 0 | 0 | 50 | 49 | 15794652 | 3.45E-01 | 1 |
| HEATR5A   | 375544  | 154 | 20  | 4430776 | 1315064 | 0 | 11 | 1 | 0 | 9  | 6  | 6246020  | 3.45E-01 | 1 |
| INFRSF10I | 694327  | 213 | 48  | 1127808 | 319332  | 0 | 5  | 2 | 0 | 50 | 54 | 16389884 | 3.45E-01 | 1 |
| KDM5A     | 305933  | 480 | 27  | 4364916 | 1168392 | 0 | 15 | 4 | 0 | 26 | 23 | 9167000  | 3.46E-01 | 1 |
| VCX3A     | 41698   | NaN | 2   | 473836  | 129584  | 0 | 2  | 0 | 0 | 50 | 64 | 26003308 | 3.46E-01 | 1 |
| MME       | 72464   | 650 | -12 | 2016384 | 483804  | 0 | 13 | 2 | 0 | 8  | 16 | 5186564  | 3.46E-01 | 1 |
| ZNHIT2    | 3267059 | 207 | 46  | 949808  | 348880  | 0 | 5  | 0 | 0 | 34 | 42 | 13459292 | 3.46E-01 | 1 |
| KRT83     | 936407  | 213 | 42  | 1256680 | 362408  | 0 | 5  | 1 | 0 | 50 | 55 | 23702836 | 3.46E-01 | 1 |

|          |         |      |     |         |         |   |    |   |   |    |     |          |          |   |
|----------|---------|------|-----|---------|---------|---|----|---|---|----|-----|----------|----------|---|
| CTH      | 339263  | 379  | -3  | 1063016 | 284800  | 0 | 5  | 1 | 0 | 50 | 50  | 20384204 | 3.46E-01 | 1 |
| CCDC30   | 644678  | 461  | 21  | 2091144 | 484872  | 0 | 8  | 0 | 0 | 2  | 0   | 841940   | 3.46E-01 | 1 |
| MSGN1    | 135007  | 1245 | 10  | 470988  | 149520  | 0 | 2  | 0 | 0 | 50 | 52  | 22598524 | 3.47E-01 | 1 |
| RAPGEF4  | 397338  | 345  | 16  | 2687800 | 697760  | 0 | 7  | 2 | 0 | 31 | 31  | 12883284 | 3.47E-01 | 1 |
| KIF13A   | 495244  | 363  | 1   | 4704184 | 1269140 | 0 | 15 | 5 | 0 | 48 | 46  | 19656540 | 3.47E-01 | 1 |
| WBSCR22  | 1139944 | 214  | 53  | 747956  | 204700  | 0 | 5  | 0 | 0 | 50 | 75  | 25067740 | 3.47E-01 | 1 |
| CAB39L   | 373856  | 343  | 50  | 896052  | 221076  | 0 | 3  | 1 | 0 | 50 | 58  | 19232544 | 3.47E-01 | 1 |
| OR51E2   | 207755  | 972  | -1  | 781420  | 251336  | 0 | 6  | 0 | 0 | 50 | 83  | 21165624 | 3.47E-01 | 1 |
| DHRS3    | 340106  | 294  | 27  | 755788  | 236384  | 0 | 4  | 2 | 0 | 7  | 8   | 2032048  | 3.47E-01 | 1 |
| TBX15    | 87793   | 927  | -4  | 1262020 | 356000  | 0 | 4  | 0 | 0 | 18 | 22  | 6948408  | 3.47E-01 | 1 |
| C11orf31 | 921177  | 497  | 8   | 311144  | 95764   | 0 | 2  | 0 | 0 | 50 | 51  | 17208328 | 3.48E-01 | 1 |
| GMPPB    | 1551582 | 271  | 48  | 980068  | 292988  | 0 | 6  | 0 | 0 | 50 | 72  | 21923548 | 3.48E-01 | 1 |
| OR4M1    | 275024  | 858  | -57 | 771096  | 233892  | 0 | 6  | 2 | 0 | 27 | 46  | 10634076 | 3.48E-01 | 1 |
| DUPD1    | 231745  | 298  | 44  | 558920  | 157708  | 0 | 4  | 1 | 0 | 21 | 31  | 9214704  | 3.48E-01 | 1 |
| CST1     | 160568  | 881  | -48 | 364188  | 101460  | 0 | 3  | 0 | 0 | 50 | 62  | 15884008 | 3.48E-01 | 1 |
| MAPK3    | NaN     | NaN  | NaN | 1013532 | 299040  | 0 | 6  | 2 | 0 | 50 | 118 | 39944624 | 3.48E-01 | 1 |
| COQ9     | 749108  | 159  | 39  | 825564  | 234960  | 0 | 3  | 0 | 0 | 50 | 52  | 18373516 | 3.48E-01 | 1 |
| TAF6L    | 2405109 | 248  | 44  | 1532224 | 508724  | 0 | 4  | 2 | 0 | 50 | 58  | 19762984 | 3.48E-01 | 1 |
| ATG10    | 156562  | 717  | 25  | 592384  | 145604  | 0 | 1  | 0 | 0 | 50 | 131 | 45941444 | 3.48E-01 | 1 |
| CA8      | 206353  | 885  | -14 | 763620  | 202920  | 0 | 2  | 0 | 0 | 50 | 65  | 23190908 | 3.48E-01 | 1 |
| PHF20    | 1341124 | 136  | 44  | 2647216 | 671060  | 0 | 14 | 3 | 0 | 50 | 67  | 20965908 | 3.49E-01 | 1 |
| DGCR8    | 587146  | 218  | 50  | 1985768 | 545392  | 0 | 8  | 2 | 0 | 50 | 52  | 19020368 | 3.49E-01 | 1 |
| MED4     | 324467  | 567  | 34  | 714848  | 181204  | 0 | 1  | 0 | 0 | 50 | 44  | 21492432 | 3.49E-01 | 1 |
| EIF4E2   | 286805  | 211  | 36  | 656464  | 159488  | 0 | 4  | 2 | 0 | 18 | 21  | 4682468  | 3.49E-01 | 1 |
| C9orf24  | 478815  | 302  | 38  | 796728  | 186900  | 0 | 4  | 1 | 0 | 49 | 40  | 16308004 | 3.49E-01 | 1 |
| CCDC117  | 571394  | 219  | -10 | 712356  | 201852  | 0 | 3  | 0 | 0 | 50 | 80  | 22835976 | 3.49E-01 | 1 |
| ANAPC2   | 1722012 | 202  | 36  | 2071920 | 620508  | 0 | 12 | 2 | 0 | 3  | 3   | 2037744  | 3.49E-01 | 1 |
| SLC46A2  | 514712  | 498  | 10  | 1148100 | 389820  | 0 | 6  | 3 | 0 | 9  | 15  | 3922764  | 3.49E-01 | 1 |
| SIGLEC9  | 355132  | 632  | 1   | 1149168 | 365256  | 0 | 4  | 3 | 0 | 11 | 16  | 4784640  | 3.49E-01 | 1 |
| SIRT1    | 321700  | 296  | -2  | 1903532 | 531508  | 0 | 8  | 0 | 0 | 12 | 20  | 8243536  | 3.50E-01 | 1 |
| CCDC73   | 408431  | 441  | 4   | 2877904 | 655040  | 0 | 8  | 1 | 0 | 50 | 40  | 19464656 | 3.50E-01 | 1 |
| BBC3     | 1350139 | 232  | 33  | 794592  | 57672   | 0 | 3  | 0 | 0 | 50 | 65  | 19950596 | 3.50E-01 | 1 |
| CIB1     | 876945  | 154  | 52  | 504096  | 136704  | 0 | 2  | 1 | 0 | 19 | 41  | 9745856  | 3.50E-01 | 1 |



|         |         |     |     |         |         |   |    |   |   |    |     |          |          |   |
|---------|---------|-----|-----|---------|---------|---|----|---|---|----|-----|----------|----------|---|
| TCEA2   | 1092168 | 208 | 49  | 780708  | 218940  | 0 | 5  | 1 | 0 | 50 | 68  | 21614896 | 3.50E-01 | 1 |
| EDDM3B  | 956361  | 577 | 8   | 391244  | 87220   | 0 | 3  | 0 | 0 | 50 | 92  | 23350396 | 3.50E-01 | 1 |
| MAB21L1 | NaN     | NaN | NaN | 892136  | 261304  | 0 | 3  | 1 | 0 | 50 | 117 | 39906888 | 3.50E-01 | 1 |
| ZCCHC8  | 866834  | 187 | 42  | 1837316 | 486652  | 0 | 7  | 0 | 0 | 41 | 31  | 15207608 | 3.50E-01 | 1 |
| DNAJC24 | 83554   | 879 | -19 | 404060  | 93628   | 0 | 1  | 0 | 0 | 50 | 59  | 21145332 | 3.51E-01 | 1 |
| DENND4A | 522427  | 240 | 42  | 4943772 | 1298688 | 0 | 14 | 1 | 0 | 2  | 1   | 2056968  | 3.51E-01 | 1 |
| HMGB4   | 131426  | 852 | 9   | 477752  | 123532  | 0 | 1  | 0 | 0 | 50 | 67  | 21034972 | 3.51E-01 | 1 |
| ZNF484  | 599194  | 463 | 39  | 2224288 | 525812  | 0 | 6  | 0 | 0 | 21 | 25  | 11451808 | 3.51E-01 | 1 |
| GPR142  | 362227  | 433 | -8  | 1126028 | 370240  | 0 | 5  | 2 | 0 | 50 | 67  | 25396328 | 3.51E-01 | 1 |
| ZDHHC19 | 1042183 | 210 | 51  | 785336  | 237808  | 0 | 2  | 1 | 0 | 50 | 66  | 16491344 | 3.52E-01 | 1 |
| NSUN2   | 253355  | 585 | 6   | 2017096 | 522608  | 0 | 8  | 1 | 0 | 50 | 62  | 20875840 | 3.52E-01 | 1 |
| MATR3   | 838943  | 177 | 35  | 2203996 | 568532  | 0 | 9  | 1 | 0 | 50 | 55  | 20798588 | 3.52E-01 | 1 |
| RHOT2   | 1207790 | 194 | 33  | 1587404 | 474904  | 0 | 3  | 1 | 0 | 17 | 19  | 6751184  | 3.52E-01 | 1 |
| TNPO3   | 821362  | 361 | 52  | 2388404 | 666076  | 0 | 10 | 3 | 0 | 50 | 81  | 24169196 | 3.52E-01 | 1 |
| MAP3K8  | 81826   | 185 | 39  | 1201500 | 327876  | 0 | 5  | 2 | 0 | 25 | 30  | 9383448  | 3.52E-01 | 1 |
| MCOLN1  | 609287  | 308 | 36  | 1481316 | 435744  | 0 | 8  | 4 | 0 | 9  | 11  | 2630484  | 3.53E-01 | 1 |
| TTC12   | 107070  | 600 | 13  | 1865796 | 488076  | 0 | 3  | 2 | 0 | 50 | 57  | 22574316 | 3.53E-01 | 1 |
| BST1    | 174344  | 327 | 66  | 828412  | 227840  | 0 | 3  | 1 | 0 | 50 | 66  | 21234688 | 3.53E-01 | 1 |
| MS4A1   | 333232  | 899 | 13  | 774300  | 206124  | 0 | 5  | 0 | 0 | 50 | 69  | 19779360 | 3.53E-01 | 1 |
| FKBP5   | 668286  | 238 | 27  | 1276616 | 293344  | 0 | 7  | 0 | 0 | 8  | 15  | 3761852  | 3.53E-01 | 1 |
| TPSD1   | 1150864 | 215 | 36  | 614456  | 183340  | 0 | 3  | 1 | 0 | 50 | 52  | 19119336 | 3.53E-01 | 1 |
| STX2    | 218767  | 440 | -19 | 846568  | 207548  | 0 | 5  | 0 | 0 | 50 | 62  | 20177012 | 3.53E-01 | 1 |
| SMOC2   | 121125  | 883 | -32 | 1202924 | 315772  | 0 | 7  | 0 | 0 | 50 | 70  | 18195872 | 3.53E-01 | 1 |
| ARHGEF3 | 380604  | 450 | 43  | 1641872 | 428980  | 0 | 6  | 0 | 0 | 40 | 49  | 18460736 | 3.53E-01 | 1 |
| DCAF17  | 514096  | 271 | 38  | 1365260 | 361696  | 0 | 5  | 2 | 0 | 16 | 12  | 5469228  | 3.53E-01 | 1 |
| OTUD7B  | 1115711 | 451 | 51  | 2133864 | 617304  | 0 | 6  | 4 | 0 | 38 | 43  | 16687144 | 3.53E-01 | 1 |
| ACSF2   | 1332860 | 200 | 23  | 1590608 | 447136  | 0 | 7  | 1 | 0 | 50 | 72  | 24178452 | 3.53E-01 | 1 |
| ACTR3C  | NaN     | NaN | NaN | 557852  | 148096  | 0 | 1  | 1 | 0 | 50 | 117 | 39793680 | 3.53E-01 | 1 |
| TAF4B   | 173138  | 460 | 31  | 2140272 | 684588  | 0 | 6  | 3 | 0 | 50 | 62  | 24315512 | 3.53E-01 | 1 |
| FGF1    | 293119  | 481 | 28  | 408688  | 103952  | 0 | 2  | 0 | 0 | 50 | 51  | 19516632 | 3.54E-01 | 1 |
| TCFL5   | 1044503 | 208 | 48  | 1236744 | 391956  | 0 | 7  | 1 | 0 | 50 | 65  | 20186624 | 3.54E-01 | 1 |
| TAB2    | 431448  | 177 | 42  | 1752588 | 496620  | 0 | 8  | 1 | 0 | 50 | 49  | 17618084 | 3.54E-01 | 1 |
| MDK     | 817153  | 212 | 45  | 378072  | 99324   | 0 | 2  | 0 | 0 | 50 | 67  | 22436900 | 3.54E-01 | 1 |

|          |         |      |     |          |         |   |    |    |   |    |     |          |          |   |
|----------|---------|------|-----|----------|---------|---|----|----|---|----|-----|----------|----------|---|
| RHOBTB2  | 740323  | 241  | 48  | 1908516  | 553224  | 0 | 4  | 1  | 0 | 41 | 36  | 17891492 | 3.54E-01 | 1 |
| RGS6     | 101461  | 823  | 26  | 1280176  | 303668  | 0 | 5  | 2  | 0 | 17 | 18  | 6940576  | 3.54E-01 | 1 |
| MLLT4    | 138570  | 643  | -2  | 4804220  | 1311148 | 0 | 13 | 2  | 0 | 2  | 2   | 2404780  | 3.54E-01 | 1 |
| ATP6V0A1 | 1993535 | 162  | 27  | 2222508  | 574584  | 0 | 10 | 1  | 0 | 20 | 37  | 10243188 | 3.54E-01 | 1 |
| ZNF80    | 410007  | 614  | 10  | 699540   | 178356  | 0 | 5  | 1  | 0 | 50 | 78  | 21467868 | 3.54E-01 | 1 |
| SLC1A6   | 961949  | 546  | 4   | 1395164  | 453544  | 0 | 5  | 0  | 0 | 5  | 1   | 1464940  | 3.54E-01 | 1 |
| FHIT     | 36866   | 1126 | 5   | 394448   | 105376  | 0 | 4  | 1  | 0 | 8  | 11  | 3150244  | 3.54E-01 | 1 |
| CTNNA1   | 1432876 | 380  | 39  | 2342124  | 636528  | 0 | 5  | 0  | 0 | 7  | 7   | 3775380  | 3.54E-01 | 1 |
| GJD4     | 153189  | 598  | -2  | 883236   | 309720  | 0 | 4  | 1  | 0 | 50 | 45  | 21159216 | 3.54E-01 | 1 |
| SGOL1    | 100093  | 761  | 9   | 1487368  | 366680  | 0 | 7  | 1  | 0 | 50 | 76  | 28594988 | 3.55E-01 | 1 |
| ZNF57    | 1119793 | 197  | 35  | 1437172  | 357068  | 0 | 5  | 0  | 0 | 50 | 56  | 20657968 | 3.55E-01 | 1 |
| OR8K3    | 10317   | 969  | -43 | 772164   | 228552  | 0 | 7  | 2  | 0 | 8  | 13  | 3063024  | 3.55E-01 | 1 |
| AKAP5    | 670466  | 221  | 54  | 1078680  | 292632  | 0 | 4  | 0  | 0 | 50 | 68  | 23232204 | 3.55E-01 | 1 |
| HDLBP    | 1287793 | 317  | 29  | 3285168  | 891780  | 0 | 13 | 2  | 0 | 35 | 32  | 14161680 | 3.55E-01 | 1 |
| ITIH1    | 1193949 | 272  | 49  | 2360992  | 652904  | 0 | 8  | 2  | 0 | 50 | 63  | 22512372 | 3.55E-01 | 1 |
| OAS1     | 621550  | 527  | 22  | 1201144  | 313280  | 0 | 5  | 1  | 0 | 50 | 61  | 19678968 | 3.55E-01 | 1 |
| PCDHGA4  | NaN     | NaN  | NaN | 2295844  | 747956  | 0 | 11 | 2  | 0 | 50 | 118 | 40393540 | 3.55E-01 | 1 |
| ERC1     | 516677  | 470  | 25  | 2906028  | 745464  | 0 | 6  | 1  | 0 | 22 | 19  | 9249948  | 3.55E-01 | 1 |
| EIF5     | 941484  | 175  | 37  | 1144896  | 277680  | 0 | 4  | 0  | 0 | 50 | 68  | 23528752 | 3.55E-01 | 1 |
| SLC26A7  | 79500   | 987  | -11 | 1768608  | 472056  | 0 | 5  | 3  | 0 | 27 | 39  | 13485992 | 3.56E-01 | 1 |
| OTX2     | 191584  | 1012 | -7  | 744040   | 219296  | 0 | 3  | 1  | 0 | 50 | 43  | 20366760 | 3.56E-01 | 1 |
| DNAH11   | 118223  | 671  | 8   | 11752272 | 3091860 | 0 | 46 | 13 | 0 | 50 | 71  | 25857348 | 3.56E-01 | 1 |
| ARHGAP6  | 65396   | NaN  | 34  | 2536856  | 766468  | 0 | 7  | 0  | 0 | 5  | 3   | 3156296  | 3.57E-01 | 1 |
| ZNF286A  | 730837  | 431  | -16 | 1364192  | 325384  | 0 | 3  | 0  | 0 | 14 | 14  | 6050932  | 3.57E-01 | 1 |
| SAT2     | 2069567 | 213  | 34  | 452476   | 116768  | 0 | 3  | 0  | 0 | 50 | 68  | 18449700 | 3.57E-01 | 1 |
| CRTP21-  | 30244   | 1055 | -70 | 209684   | 57316   | 0 | 2  | 0  | 0 | 50 | 78  | 14431172 | 3.57E-01 | 1 |
| NPHS2    | 585744  | 613  | -14 | 968320   | 294056  | 0 | 4  | 1  | 0 | 50 | 44  | 17868352 | 3.57E-01 | 1 |
| PGBD1    | 273319  | 502  | 35  | 2086516  | 538628  | 0 | 9  | 0  | 0 | 7  | 3   | 2515496  | 3.57E-01 | 1 |
| MBNL2    | 110548  | 419  | 23  | 1036672  | 292988  | 0 | 3  | 1  | 0 | 50 | 50  | 20472136 | 3.57E-01 | 1 |
| RNF128   | 149556  | NaN  | 17  | 1423288  | 412604  | 0 | 6  | 2  | 0 | 50 | 83  | 20519128 | 3.57E-01 | 1 |
| CDH11    | 23628   | 1085 | -56 | 2030268  | 566040  | 0 | 14 | 6  | 0 | 16 | 27  | 6639400  | 3.57E-01 | 1 |
| CCL13    | 40425   | 871  | -32 | 258456   | 69420   | 0 | 2  | 0  | 0 | 50 | 85  | 19967328 | 3.57E-01 | 1 |
| LIM2     | 368509  | 610  | -9  | 549308   | 159844  | 0 | 1  | 1  | 0 | 50 | 39  | 14321524 | 3.57E-01 | 1 |

|         |         |     |     |          |         |   |    |   |   |    |     |          |          |   |
|---------|---------|-----|-----|----------|---------|---|----|---|---|----|-----|----------|----------|---|
| TMCC1   | 614377  | 357 | 40  | 1640804  | 467428  | 0 | 7  | 1 | 0 | 41 | 53  | 20666156 | 3.57E-01 | 1 |
| MEGF9   | 551753  | 185 | 15  | 1600576  | 479888  | 0 | 6  | 0 | 0 | 17 | 11  | 7114304  | 3.58E-01 | 1 |
| HMGCLL1 | 28261   | 691 | -14 | 955504   | 271628  | 0 | 4  | 1 | 0 | 39 | 66  | 19980856 | 3.58E-01 | 1 |
| USF2    | 767246  | 472 | 7   | 892492   | 257744  | 0 | 2  | 0 | 0 | 50 | 41  | 16380272 | 3.58E-01 | 1 |
| TXNIP   | 739922  | 172 | 39  | 1008548  | 277324  | 0 | 13 | 4 | 0 | 1  | 6   | 833752   | 3.58E-01 | 1 |
| ABHD15  | 802576  | 353 | 23  | 1121400  | 387684  | 0 | 5  | 1 | 0 | 50 | 56  | 21184136 | 3.58E-01 | 1 |
| ZNF683  | 1021101 | 217 | 22  | 1252764  | 391956  | 0 | 4  | 0 | 0 | 6  | 1   | 1611612  | 3.58E-01 | 1 |
| PDP1    | 319459  | 423 | 5   | 1499116  | 420080  | 0 | 5  | 1 | 0 | 50 | 50  | 18608476 | 3.58E-01 | 1 |
| RHOH    | 486675  | 348 | 48  | 473124   | 142044  | 0 | 3  | 1 | 0 | 50 | 51  | 20582496 | 3.58E-01 | 1 |
| DKKL1   | 2183690 | 309 | 30  | 608404   | 189392  | 0 | 3  | 1 | 0 | 50 | 56  | 21603148 | 3.58E-01 | 1 |
| ISM1    | 117713  | 704 | -35 | 1187616  | 325740  | 0 | 4  | 0 | 0 | 15 | 30  | 8991492  | 3.58E-01 | 1 |
| WNT16   | 97501   | 535 | -14 | 989680   | 269492  | 0 | 4  | 0 | 0 | 18 | 29  | 9770064  | 3.58E-01 | 1 |
| ZCCHC14 | 587162  | 363 | 21  | 2377368  | 719832  | 0 | 5  | 2 | 0 | 50 | 51  | 23515580 | 3.58E-01 | 1 |
| PABPC3  | 436184  | 650 | 30  | 1564620  | 462444  | 0 | 5  | 2 | 0 | 21 | 18  | 6334308  | 3.58E-01 | 1 |
| TAGLN3  | 262689  | 336 | 14  | 526524   | 131364  | 0 | 2  | 0 | 0 | 50 | 44  | 19588188 | 3.59E-01 | 1 |
| JAK3    | 1216364 | 212 | 37  | 2840880  | 861876  | 0 | 10 | 4 | 0 | 41 | 31  | 13971220 | 3.59E-01 | 1 |
| USP29   | 311003  | 924 | -64 | 2348888  | 612676  | 0 | 13 | 0 | 0 | 10 | 8   | 4126040  | 3.59E-01 | 1 |
| LIPG    | 243067  | 352 | 56  | 1301180  | 342472  | 0 | 5  | 0 | 0 | 50 | 43  | 14948084 | 3.59E-01 | 1 |
| IL22RA2 | 124672  | 436 | 50  | 706660   | 164828  | 0 | 3  | 0 | 0 | 50 | 62  | 25049940 | 3.59E-01 | 1 |
| PRR14   | 2255010 | 158 | 60  | 1436460  | 490212  | 0 | 5  | 2 | 0 | 50 | 74  | 23170972 | 3.59E-01 | 1 |
| SMAD4   | 156084  | 422 | 41  | 1428984  | 385548  | 0 | 7  | 1 | 0 | 50 | 69  | 24802164 | 3.59E-01 | 1 |
| NOP2    | 2764720 | 179 | 42  | 2055900  | 600216  | 0 | 7  | 3 | 0 | 32 | 46  | 13936332 | 3.59E-01 | 1 |
| POLE    | 724450  | 495 | 35  | 5923484  | 1611256 | 0 | 22 | 5 | 0 | 17 | 23  | 8788572  | 3.59E-01 | 1 |
| TICAM1  | 765978  | 187 | 52  | 1713072  | 571380  | 0 | 8  | 1 | 0 | 44 | 54  | 16628048 | 3.59E-01 | 1 |
| SSPO    | 455147  | 615 | 28  | 13065556 | 3884672 | 0 | 33 | 7 | 0 | 16 | 20  | 9253508  | 3.59E-01 | 1 |
| ZP2     | 402663  | 575 | 41  | 1947320  | 521896  | 0 | 6  | 3 | 0 | 50 | 69  | 22447580 | 3.59E-01 | 1 |
| SERTAD1 | 1010633 | 202 | 34  | 566396   | 195088  | 0 | 2  | 0 | 0 | 50 | 62  | 18103668 | 3.60E-01 | 1 |
| PRKAR2B | 231025  | 644 | 17  | 1092564  | 292632  | 0 | 5  | 0 | 0 | 50 | 48  | 21470716 | 3.60E-01 | 1 |
| ATP12A  | 467468  | 619 | 40  | 2697412  | 747956  | 0 | 15 | 5 | 0 | 50 | 82  | 24130392 | 3.60E-01 | 1 |
| NAA30   | 150623  | 939 | 16  | 903172   | 275900  | 0 | 2  | 0 | 0 | 50 | 49  | 19772596 | 3.60E-01 | 1 |
| DAZAP2  | 494861  | 194 | 40  | 792456   | 167676  | 0 | 3  | 0 | 0 | 50 | 55  | 17528372 | 3.60E-01 | 1 |
| COL14A1 | 262056  | 839 | -5  | 4645800  | 1312572 | 0 | 21 | 3 | 0 | 2  | 5   | 1924180  | 3.60E-01 | 1 |
| CDR1    | 18661   | NaN | -31 | 674620   | 168032  | 0 | 4  | 1 | 0 | 50 | 103 | 19610260 | 3.60E-01 | 1 |

|          |         |     |     |         |         |   |    |   |   |    |     |          |          |   |
|----------|---------|-----|-----|---------|---------|---|----|---|---|----|-----|----------|----------|---|
| SESN1    | 385493  | 465 | 26  | 1446784 | 361340  | 0 | 9  | 2 | 0 | 11 | 13  | 5118924  | 3.60E-01 | 1 |
| TROVE2   | 288840  | 433 | -13 | 1449276 | 374868  | 0 | 5  | 0 | 0 | 14 | 11  | 6525124  | 3.60E-01 | 1 |
| WDFY1    | 307044  | 251 | 22  | 1095768 | 270204  | 0 | 2  | 0 | 0 | 50 | 41  | 23605648 | 3.60E-01 | 1 |
| SULT2A1  | 881316  | 336 | 39  | 762908  | 174796  | 0 | 4  | 0 | 0 | 50 | 70  | 22504896 | 3.60E-01 | 1 |
| COL11A1  | 37620   | 742 | -20 | 4793896 | 1445360 | 0 | 24 | 4 | 0 | 19 | 25  | 8389496  | 3.60E-01 | 1 |
| ODF3L1   | 569836  | 231 | 44  | 694556  | 199360  | 0 | 3  | 1 | 0 | 50 | 44  | 20007912 | 3.60E-01 | 1 |
| SMC5     | 196227  | 395 | -11 | 2922404 | 710932  | 0 | 12 | 2 | 0 | 32 | 31  | 14226828 | 3.61E-01 | 1 |
| BCL10    | 348743  | 384 | 3   | 586688  | 171592  | 0 | 3  | 0 | 0 | 50 | 52  | 20151380 | 3.61E-01 | 1 |
| OR9Q2    | 637499  | 828 | -25 | 770384  | 243148  | 0 | 4  | 2 | 0 | 50 | 51  | 16635524 | 3.61E-01 | 1 |
| HIST1H4H | 390169  | 544 | 57  | 248844  | 86508   | 0 | 2  | 0 | 0 | 50 | 61  | 13862640 | 3.61E-01 | 1 |
| UBE2B    | 929843  | 170 | 46  | 411180  | 100392  | 0 | 2  | 0 | 0 | 50 | 67  | 23256412 | 3.61E-01 | 1 |
| TAF9B    | 549810  | NaN | 14  | 652548  | 182628  | 0 | 2  | 0 | 0 | 50 | 83  | 23441888 | 3.61E-01 | 1 |
| ATF7     | 1542915 | 154 | 52  | 1247780 | 385192  | 0 | 4  | 1 | 0 | 41 | 37  | 15406256 | 3.61E-01 | 1 |
| TCHP     | 927742  | 323 | 37  | 1325744 | 322180  | 0 | 9  | 0 | 0 | 3  | 16  | 3707740  | 3.61E-01 | 1 |
| RGS16    | 597206  | 812 | -3  | 523320  | 144180  | 0 | 3  | 0 | 0 | 50 | 60  | 22449360 | 3.62E-01 | 1 |
| ETFB     | 368509  | 610 | -9  | 897832  | 298328  | 0 | 3  | 2 | 0 | 50 | 39  | 14321524 | 3.62E-01 | 1 |
| UPF3A    | 612511  | 283 | 46  | 1239592 | 329300  | 0 | 3  | 0 | 0 | 50 | 47  | 21694284 | 3.62E-01 | 1 |
| SPINK7   | 72574   | 418 | -9  | 232824  | 57672   | 0 | 1  | 0 | 0 | 50 | 57  | 21768688 | 3.62E-01 | 1 |
| ABCC4    | 200377  | 596 | 30  | 3466728 | 960132  | 0 | 10 | 1 | 0 | 6  | 6   | 3771820  | 3.62E-01 | 1 |
| IL17RC   | 950574  | 170 | 54  | 1992176 | 624424  | 0 | 6  | 2 | 0 | 39 | 56  | 16713132 | 3.62E-01 | 1 |
| IDH3G    | 2103463 | NaN | 30  | 1066932 | 311856  | 0 | 2  | 0 | 0 | 16 | 21  | 8064112  | 3.62E-01 | 1 |
| RAB1B    | 2133752 | 236 | 53  | 525100  | 145604  | 0 | 1  | 0 | 0 | 50 | 77  | 24481764 | 3.62E-01 | 1 |
| OR1L3    | 409923  | 553 | 12  | 800288  | 239944  | 0 | 3  | 0 | 0 | 50 | 56  | 16898964 | 3.62E-01 | 1 |
| MTHFD2L  | 180212  | 330 | 15  | 891424  | 255608  | 0 | 4  | 0 | 0 | 50 | 52  | 20371744 | 3.62E-01 | 1 |
| LRRC39   | 294945  | 518 | 11  | 881100  | 229620  | 0 | 2  | 0 | 0 | 50 | 53  | 21667940 | 3.63E-01 | 1 |
| MRPL32   | 163131  | 744 | -6  | 479532  | 136704  | 0 | 2  | 1 | 0 | 45 | 40  | 17682520 | 3.63E-01 | 1 |
| NFATC1   | 213864  | 598 | 6   | 2440380 | 781776  | 0 | 11 | 2 | 0 | 16 | 13  | 6597036  | 3.63E-01 | 1 |
| PSG7     | 282702  | 238 | -37 | 1064084 | 305092  | 0 | 7  | 2 | 0 | 22 | 51  | 10502000 | 3.63E-01 | 1 |
| GLRX2    | 288840  | 433 | -13 | 526880  | 149164  | 0 | 2  | 0 | 0 | 50 | 38  | 18047420 | 3.63E-01 | 1 |
| OR10T2   | 135429  | 902 | 5   | 764332  | 242792  | 0 | 4  | 1 | 0 | 50 | 50  | 16503092 | 3.63E-01 | 1 |
| OR7D4    | 398878  | 582 | -50 | 761484  | 241368  | 0 | 5  | 0 | 0 | 50 | 116 | 31105500 | 3.63E-01 | 1 |
| HK3      | 1129866 | 222 | 54  | 2303676 | 733716  | 0 | 9  | 3 | 0 | 21 | 43  | 11441128 | 3.63E-01 | 1 |
| WBP1     | 1069803 | 343 | 45  | 669992  | 207904  | 0 | 2  | 1 | 0 | 50 | 68  | 19848780 | 3.63E-01 | 1 |

|          |         |      |     |         |         |   |    |   |   |    |    |          |          |   |
|----------|---------|------|-----|---------|---------|---|----|---|---|----|----|----------|----------|---|
| RPS19    | 1360684 | 454  | 23  | 380920  | 108224  | 0 | 1  | 0 | 0 | 50 | 69 | 18698900 | 3.64E-01 | 1 |
| BTNL3    | 893236  | 602  | 29  | 1196872 | 329300  | 0 | 3  | 2 | 0 | 50 | 80 | 23793260 | 3.64E-01 | 1 |
| KCNIP1   | 52578   | 618  | 31  | 702388  | 158420  | 0 | 3  | 1 | 0 | 4  | 2  | 1707732  | 3.64E-01 | 1 |
| LONRF3   | 571717  | NaN  | 27  | 1928452 | 551444  | 0 | 3  | 0 | 0 | 20 | 21 | 11136392 | 3.64E-01 | 1 |
| TRMT5    | 216411  | 578  | -1  | 1302960 | 350304  | 0 | 6  | 1 | 0 | 50 | 47 | 18400216 | 3.64E-01 | 1 |
| ARHGAP2' | 754492  | 194  | 21  | 1420796 | 402280  | 0 | 5  | 0 | 0 | 50 | 57 | 21830632 | 3.64E-01 | 1 |
| OTUD4    | 192885  | 1089 | 33  | 2716992 | 734784  | 0 | 10 | 1 | 0 | 28 | 33 | 12383460 | 3.64E-01 | 1 |
| STK31    | 367849  | 441  | 14  | 2712008 | 658600  | 0 | 12 | 2 | 0 | 48 | 49 | 18565400 | 3.64E-01 | 1 |
| SPPL2A   | 329469  | 225  | 20  | 1365260 | 363832  | 0 | 3  | 1 | 0 | 50 | 38 | 22235048 | 3.64E-01 | 1 |
| PIGF     | 603816  | 252  | 35  | 635460  | 177288  | 0 | 2  | 0 | 0 | 50 | 45 | 22018244 | 3.64E-01 | 1 |
| GKAP1    | 468451  | 384  | 5   | 988612  | 234248  | 0 | 4  | 1 | 0 | 50 | 47 | 21887948 | 3.64E-01 | 1 |
| HIST1H3D | 398813  | 636  | 53  | 333216  | 112140  | 0 | 2  | 1 | 0 | 50 | 45 | 13638004 | 3.64E-01 | 1 |
| FIP1L1   | 120581  | 470  | 32  | 1593812 | 418300  | 0 | 6  | 1 | 0 | 50 | 55 | 24278132 | 3.64E-01 | 1 |
| TRMT6    | 301031  | 346  | 13  | 1297620 | 340692  | 0 | 5  | 2 | 0 | 35 | 39 | 14251392 | 3.64E-01 | 1 |
| YWHAG    | 850568  | 195  | 53  | 629408  | 169456  | 0 | 4  | 0 | 0 | 50 | 69 | 21293072 | 3.64E-01 | 1 |
| SNX29    | 477277  | 758  | 18  | 1127808 | 302244  | 0 | 5  | 1 | 0 | 50 | 40 | 17715272 | 3.64E-01 | 1 |
| TMTC2    | 61571   | 1375 | -11 | 2138848 | 589892  | 0 | 7  | 2 | 0 | 21 | 26 | 10906060 | 3.64E-01 | 1 |
| AIP1     | 249769  | 359  | 6   | 976152  | 280884  | 0 | 3  | 1 | 0 | 50 | 56 | 19275264 | 3.64E-01 | 1 |
| ZNF827   | 110708  | 1103 | 30  | 2745116 | 766468  | 0 | 8  | 2 | 0 | 50 | 47 | 22796104 | 3.65E-01 | 1 |
| KNDC1    | 318075  | 452  | -11 | 4384852 | 1347104 | 0 | 12 | 2 | 0 | 2  | 2  | 2177296  | 3.65E-01 | 1 |
| KTN1     | 687929  | 308  | 23  | 3705604 | 840872  | 0 | 10 | 1 | 0 | 9  | 21 | 8278780  | 3.65E-01 | 1 |
| ZNF423   | 105426  | 876  | -16 | 3293712 | 857604  | 0 | 17 | 5 | 0 | 21 | 28 | 8882912  | 3.65E-01 | 1 |
| GLA      | 374364  | NaN  | 37  | 1117128 | 288360  | 0 | 3  | 0 | 0 | 25 | 27 | 11161312 | 3.65E-01 | 1 |
| TIMD4    | 135146  | 1235 | 16  | 968320  | 282308  | 0 | 5  | 2 | 0 | 11 | 12 | 3809200  | 3.65E-01 | 1 |
| MSL1     | 1573630 | 202  | 28  | 919192  | 242792  | 0 | 3  | 0 | 0 | 50 | 61 | 21397024 | 3.65E-01 | 1 |
| RAB11A   | 701874  | 296  | 36  | 561412  | 150944  | 0 | 1  | 0 | 0 | 50 | 58 | 21529100 | 3.65E-01 | 1 |
| PHLDA1   | 604083  | 438  | 17  | 988968  | 305448  | 0 | 3  | 0 | 0 | 50 | 67 | 21773672 | 3.65E-01 | 1 |
| CETN3    | 83403   | 824  | 19  | 455680  | 99680   | 0 | 2  | 0 | 0 | 50 | 53 | 21560072 | 3.65E-01 | 1 |
| C19orf53 | 767214  | 289  | 6   | 257032  | 74048   | 0 | 2  | 1 | 0 | 16 | 26 | 6349972  | 3.65E-01 | 1 |
| TAAR1    | 125852  | 605  | 19  | 865436  | 223924  | 0 | 4  | 2 | 0 | 6  | 9  | 3325396  | 3.65E-01 | 1 |
| DOPEY1   | 151511  | 697  | 7   | 6353532 | 1705596 | 0 | 19 | 5 | 0 | 47 | 71 | 26472160 | 3.65E-01 | 1 |
| DAND5    | 1886809 | 335  | 40  | 454968  | 160200  | 0 | 1  | 0 | 0 | 50 | 62 | 18190176 | 3.65E-01 | 1 |
| CCDC120  | 833689  | NaN  | 41  | 1608052 | 572804  | 0 | 5  | 1 | 0 | 50 | 74 | 21714932 | 3.65E-01 | 1 |

|          |         |      |     |         |         |   |    |   |   |    |     |          |          |   |
|----------|---------|------|-----|---------|---------|---|----|---|---|----|-----|----------|----------|---|
| IARS2    | 651419  | 613  | -1  | 2635468 | 704168  | 0 | 6  | 0 | 0 | 4  | 0   | 1641516  | 3.66E-01 | 1 |
| CCDC85A  | 63834   | 739  | -15 | 1393028 | 403348  | 0 | 5  | 1 | 0 | 30 | 46  | 16987252 | 3.66E-01 | 1 |
| APOBEC3I | 1386387 | 372  | 71  | 1011752 | 253828  | 0 | 3  | 1 | 0 | 50 | 61  | 16059872 | 3.66E-01 | 1 |
| ZBTB2    | 337954  | 409  | 23  | 1293704 | 364900  | 0 | 4  | 0 | 0 | 50 | 37  | 21182356 | 3.66E-01 | 1 |
| LPL      | 203407  | 316  | 8   | 1237812 | 326808  | 0 | 4  | 1 | 0 | 50 | 51  | 20141412 | 3.66E-01 | 1 |
| SLMO2    | 948552  | 126  | 25  | 509436  | 136704  | 0 | 2  | 1 | 0 | 42 | 78  | 18923892 | 3.66E-01 | 1 |
| CXADR    | 100910  | 366  | -17 | 939128  | 259168  | 0 | 3  | 1 | 0 | 28 | 24  | 10681780 | 3.66E-01 | 1 |
| DNAJC15  | 56984   | 249  | 51  | 395516  | 109648  | 0 | 2  | 0 | 0 | 50 | 57  | 19444720 | 3.66E-01 | 1 |
| DALRD3   | 1799657 | 241  | 41  | 1354580 | 439660  | 0 | 5  | 3 | 0 | 27 | 51  | 14314048 | 3.67E-01 | 1 |
| HRNR     | 486922  | 468  | 25  | 6851932 | 2291216 | 0 | 29 | 4 | 0 | 8  | 13  | 5121772  | 3.67E-01 | 1 |
| SMR3B    | 264684  | 915  | 25  | 195800  | 69064   | 0 | 1  | 0 | 0 | 50 | 42  | 17431540 | 3.67E-01 | 1 |
| NT5C1B   | 39949   | 1075 | -7  | 1553228 | 442864  | 0 | 5  | 1 | 0 | 26 | 23  | 10458924 | 3.67E-01 | 1 |
| LRIG1    | 82885   | 629  | 14  | 2762560 | 821648  | 0 | 11 | 4 | 0 | 50 | 50  | 17681096 | 3.68E-01 | 1 |
| RGR      | 216056  | 869  | -4  | 750092  | 226060  | 0 | 4  | 1 | 0 | 50 | 58  | 19593172 | 3.68E-01 | 1 |
| PRRT2    | NaN     | NaN  | NaN | 830548  | 274832  | 0 | 4  | 0 | 0 | 50 | 116 | 39920416 | 3.68E-01 | 1 |
| FAM83E   | 1597109 | 242  | 31  | 1147744 | 406196  | 0 | 6  | 1 | 0 | 50 | 57  | 20781500 | 3.68E-01 | 1 |
| OR4C13   | 11675   | 1171 | -40 | 773944  | 223568  | 0 | 4  | 1 | 0 | 3  | 3   | 1385908  | 3.68E-01 | 1 |
| FAM24A   | 290558  | 619  | 14  | 275900  | 72268   | 0 | 2  | 0 | 0 | 18 | 28  | 7230360  | 3.68E-01 | 1 |
| NUDCD2   | 226025  | 696  | 12  | 410468  | 110716  | 0 | 1  | 1 | 0 | 50 | 71  | 18478892 | 3.69E-01 | 1 |
| MBTPS1   | 522600  | 435  | 8   | 2712008 | 751516  | 0 | 10 | 3 | 0 | 8  | 18  | 6329680  | 3.69E-01 | 1 |
| ADAMTS9  | 90552   | 783  | -10 | 5058760 | 1312928 | 0 | 23 | 5 | 0 | 29 | 43  | 14023552 | 3.69E-01 | 1 |
| ADH4     | 166160  | 760  | 1   | 979000  | 278036  | 0 | 2  | 1 | 0 | 31 | 27  | 12969080 | 3.69E-01 | 1 |
| XPO5     | 1249985 | 194  | 51  | 3148820 | 844432  | 0 | 10 | 2 | 0 | 38 | 36  | 15344312 | 3.69E-01 | 1 |
| C3orf67  | 146530  | 837  | 19  | 1478468 | 379852  | 0 | 6  | 0 | 0 | 41 | 41  | 18636244 | 3.69E-01 | 1 |
| IL1RAP   | 139316  | 398  | 0   | 2099332 | 561056  | 0 | 5  | 1 | 0 | 50 | 49  | 23900416 | 3.69E-01 | 1 |
| MTRF1    | 309426  | 300  | 61  | 1177648 | 289784  | 0 | 5  | 0 | 0 | 50 | 68  | 21950960 | 3.69E-01 | 1 |
| EPHA7    | 18346   | 1054 | -25 | 2589188 | 679960  | 0 | 10 | 2 | 0 | 25 | 61  | 15716688 | 3.69E-01 | 1 |
| KIAA1328 | 99312   | 893  | -1  | 1497692 | 394804  | 0 | 3  | 0 | 0 | 50 | 54  | 22392400 | 3.69E-01 | 1 |
| POLR2D   | 588745  | 248  | 39  | 379140  | 93984   | 0 | 2  | 0 | 0 | 50 | 66  | 22074848 | 3.69E-01 | 1 |
| ZMIZ2    | 1289776 | 164  | 55  | 2299760 | 728020  | 0 | 10 | 4 | 0 | 47 | 52  | 18688220 | 3.69E-01 | 1 |
| NUP43    | 425807  | 234  | 39  | 987900  | 264864  | 0 | 4  | 2 | 0 | 28 | 20  | 10059848 | 3.69E-01 | 1 |
| RIMKLA   | 573046  | 574  | 22  | 983628  | 289428  | 0 | 2  | 0 | 0 | 14 | 10  | 5975460  | 3.69E-01 | 1 |
| UBXN2B   | 197666  | 638  | 26  | 856892  | 236740  | 0 | 4  | 1 | 0 | 45 | 47  | 17427624 | 3.70E-01 | 1 |

|           |         |      |     |         |         |   |    |   |   |    |     |          |          |   |
|-----------|---------|------|-----|---------|---------|---|----|---|---|----|-----|----------|----------|---|
| EDAR      | 358833  | 424  | 14  | 1164120 | 321468  | 0 | 5  | 0 | 0 | 32 | 35  | 11353552 | 3.70E-01 | 1 |
| PARP9     | 410045  | 404  | 35  | 2250988 | 585620  | 0 | 8  | 3 | 0 | 50 | 47  | 20160992 | 3.70E-01 | 1 |
| PRDM11    | 145644  | 592  | 14  | 1312216 | 358136  | 0 | 6  | 0 | 0 | 14 | 19  | 8330756  | 3.70E-01 | 1 |
| IIST1H2AI | 227588  | 622  | 29  | 306516  | 108936  | 0 | 2  | 1 | 0 | 14 | 21  | 3578512  | 3.70E-01 | 1 |
| RSPRY1    | 717872  | 149  | 48  | 1510864 | 395516  | 0 | 6  | 0 | 0 | 16 | 11  | 4261676  | 3.70E-01 | 1 |
| INADL     | 274287  | 469  | -3  | 4660396 | 1292636 | 0 | 14 | 5 | 0 | 47 | 45  | 18117552 | 3.70E-01 | 1 |
| BDH2      | 350185  | 454  | 27  | 655752  | 170880  | 0 | 2  | 0 | 0 | 29 | 26  | 15759408 | 3.70E-01 | 1 |
| PPP2R3B   | NaN     | NaN  | NaN | 1480960 | 415808  | 0 | 4  | 2 | 0 | 50 | 118 | 40061392 | 3.70E-01 | 1 |
| TINAGL1   | 1061386 | 197  | 37  | 1208264 | 338200  | 0 | 4  | 1 | 0 | 50 | 49  | 17656888 | 3.70E-01 | 1 |
| SP8       | 109058  | 730  | 11  | 1214316 | 422928  | 0 | 4  | 0 | 0 | 50 | 79  | 26321216 | 3.70E-01 | 1 |
| RRP1B     | 892193  | 157  | 72  | 1961916 | 534000  | 0 | 7  | 2 | 0 | 50 | 49  | 20805352 | 3.70E-01 | 1 |
| GRM2      | 759916  | 456  | 37  | 2126388 | 687792  | 0 | 8  | 3 | 0 | 50 | 51  | 19214744 | 3.70E-01 | 1 |
| LMNB1     | 237464  | 579  | 37  | 1510508 | 412960  | 0 | 4  | 0 | 0 | 15 | 13  | 7340008  | 3.71E-01 | 1 |
| VSNL1     | 135361  | 1255 | -2  | 508368  | 119616  | 0 | 2  | 0 | 0 | 50 | 39  | 17853756 | 3.71E-01 | 1 |
| MEM132I   | 222789  | 740  | -3  | 2388404 | 805984  | 0 | 10 | 4 | 0 | 31 | 27  | 10851236 | 3.71E-01 | 1 |
| NARF      | 2583801 | 179  | 20  | 1310792 | 347812  | 0 | 4  | 0 | 0 | 50 | 62  | 26646600 | 3.71E-01 | 1 |
| SRA1      | 706371  | 319  | 29  | 599148  | 177288  | 0 | 2  | 0 | 0 | 50 | 44  | 23563640 | 3.71E-01 | 1 |
| OR4K17    | 383274  | 768  | -37 | 850484  | 251692  | 0 | 3  | 1 | 0 | 49 | 56  | 18627344 | 3.71E-01 | 1 |
| CYP27C1   | 354277  | 226  | 19  | 950520  | 274476  | 0 | 3  | 0 | 0 | 31 | 26  | 13802476 | 3.71E-01 | 1 |
| NRIP2     | 495532  | 443  | 28  | 713780  | 213244  | 0 | 2  | 0 | 0 | 11 | 20  | 7171976  | 3.71E-01 | 1 |
| PPFIA1    | 514596  | 530  | 44  | 3131020 | 843008  | 0 | 11 | 2 | 0 | 28 | 27  | 9320080  | 3.71E-01 | 1 |
| CORO1B    | 1392213 | 215  | 53  | 1244220 | 368460  | 0 | 2  | 2 | 0 | 50 | 41  | 15455384 | 3.71E-01 | 1 |
| MCM9      | 116680  | 856  | 16  | 1011396 | 270204  | 0 | 6  | 0 | 0 | 50 | 53  | 18718480 | 3.71E-01 | 1 |
| RBM15     | 449729  | 379  | 28  | 2363840 | 780352  | 0 | 8  | 3 | 0 | 42 | 49  | 16820644 | 3.71E-01 | 1 |
| ING4      | 2816983 | 210  | 61  | 683520  | 149520  | 0 | 3  | 0 | 0 | 28 | 58  | 17156708 | 3.71E-01 | 1 |
| MMAB      | 436841  | 428  | 38  | 655396  | 185120  | 0 | 2  | 1 | 0 | 50 | 62  | 20971960 | 3.72E-01 | 1 |
| PRDX6     | 426891  | 390  | 12  | 573516  | 166608  | 0 | 4  | 1 | 0 | 33 | 50  | 15760120 | 3.72E-01 | 1 |
| PDK1      | 417145  | 365  | 23  | 1135640 | 309364  | 0 | 3  | 1 | 0 | 50 | 41  | 20266724 | 3.72E-01 | 1 |
| ADAMTS3   | 70065   | 633  | -15 | 3146328 | 809544  | 0 | 13 | 1 | 0 | 14 | 14  | 7105048  | 3.72E-01 | 1 |
| MRPL55    | 702621  | 391  | 5   | 419724  | 131364  | 0 | 2  | 0 | 0 | 50 | 46  | 17014308 | 3.72E-01 | 1 |
| PCDHGA8   | NaN     | NaN  | NaN | 2308660 | 733004  | 0 | 9  | 2 | 0 | 50 | 118 | 40378588 | 3.72E-01 | 1 |
| C1QTNF3   | 273505  | 817  | 1   | 827344  | 221432  | 0 | 2  | 0 | 0 | 50 | 46  | 19280248 | 3.72E-01 | 1 |
| VAPA      | 405142  | 172  | 42  | 767180  | 203632  | 0 | 3  | 0 | 0 | 50 | 45  | 16608112 | 3.73E-01 | 1 |

|          |         |      |     |         |         |   |    |   |   |    |    |          |          |   |
|----------|---------|------|-----|---------|---------|---|----|---|---|----|----|----------|----------|---|
| ELL3     | 784327  | 286  | 37  | 1034892 | 283020  | 0 | 3  | 0 | 0 | 17 | 14 | 6234272  | 3.73E-01 | 1 |
| KLK8     | 536101  | 606  | 25  | 793524  | 210396  | 0 | 2  | 1 | 0 | 50 | 50 | 19945968 | 3.73E-01 | 1 |
| RPS6KC1  | 226813  | 600  | 0   | 2750100 | 728376  | 0 | 14 | 2 | 0 | 29 | 25 | 10009652 | 3.73E-01 | 1 |
| CAPRN2   | 286973  | 420  | -8  | 2902112 | 784624  | 0 | 9  | 1 | 0 | 13 | 9  | 5584928  | 3.73E-01 | 1 |
| OR4K2    | 431654  | 854  | -49 | 782488  | 226772  | 0 | 7  | 1 | 0 | 50 | 78 | 18107940 | 3.73E-01 | 1 |
| KIAA0907 | 1988461 | 174  | 32  | 1562484 | 465648  | 0 | 6  | 4 | 0 | 24 | 42 | 9441476  | 3.73E-01 | 1 |
| PDCD6    | 935283  | 530  | 28  | 510148  | 128516  | 0 | 3  | 0 | 0 | 50 | 64 | 18094768 | 3.73E-01 | 1 |
| GPRASP1  | 123687  | NaN  | 23  | 3538996 | 933788  | 0 | 9  | 1 | 0 | 22 | 14 | 7859768  | 3.73E-01 | 1 |
| FAM131A  | 1447013 | 268  | 44  | 908156  | 289072  | 0 | 3  | 1 | 0 | 50 | 77 | 28073092 | 3.73E-01 | 1 |
| RNF10    | 1583841 | 209  | 40  | 2101112 | 568888  | 0 | 7  | 2 | 0 | 50 | 66 | 21210124 | 3.73E-01 | 1 |
| MSRA     | 114315  | 831  | 6   | 629764  | 163760  | 0 | 2  | 0 | 0 | 50 | 69 | 19688224 | 3.74E-01 | 1 |
| MYLK     | 284041  | 449  | 32  | 4897492 | 1370600 | 0 | 14 | 4 | 0 | 50 | 60 | 22813904 | 3.74E-01 | 1 |
| PCDH20   | 3527    | 1075 | -43 | 2336784 | 717696  | 0 | 14 | 5 | 0 | 13 | 22 | 4734800  | 3.74E-01 | 1 |
| NEU2     | 410526  | 294  | 33  | 931296  | 292632  | 0 | 3  | 1 | 0 | 50 | 54 | 19620940 | 3.74E-01 | 1 |
| TMEM74   | 275834  | 891  | -14 | 758280  | 226416  | 0 | 4  | 0 | 0 | 50 | 55 | 18296264 | 3.74E-01 | 1 |
| CLSPN    | 1224684 | 303  | 25  | 3532944 | 865080  | 0 | 12 | 2 | 0 | 49 | 48 | 19403068 | 3.74E-01 | 1 |
| TAS2R41  | 371260  | 379  | 1   | 758992  | 227840  | 0 | 3  | 1 | 0 | 50 | 51 | 20287016 | 3.74E-01 | 1 |
| RNF17    | 486857  | 629  | 29  | 4284460 | 1070492 | 0 | 15 | 4 | 0 | 24 | 30 | 11572136 | 3.74E-01 | 1 |
| HIST2H3D | 681585  | 560  | 28  | 326096  | 110716  | 0 | 2  | 1 | 0 | 15 | 26 | 7902488  | 3.74E-01 | 1 |
| MYOCD    | 113594  | 848  | -54 | 2512292 | 718408  | 0 | 9  | 2 | 0 | 11 | 15 | 4366696  | 3.74E-01 | 1 |
| HNRNPC   | 730651  | 357  | 37  | 803848  | 209684  | 0 | 2  | 0 | 0 | 50 | 54 | 23555096 | 3.74E-01 | 1 |
| C12orf49 | 228972  | 411  | -2  | 540052  | 137060  | 0 | 2  | 1 | 0 | 42 | 37 | 17963404 | 3.74E-01 | 1 |
| PTDSS1   | 219234  | 671  | 13  | 1258104 | 313992  | 0 | 7  | 1 | 0 | 50 | 74 | 23505256 | 3.75E-01 | 1 |
| OAZ2     | 847146  | 269  | 42  | 489500  | 137416  | 0 | 1  | 0 | 0 | 50 | 76 | 26244676 | 3.75E-01 | 1 |
| CEPT1    | 388536  | 627  | 27  | 1072984 | 297260  | 0 | 2  | 0 | 0 | 50 | 58 | 29222260 | 3.75E-01 | 1 |
| ASB11    | 201763  | NaN  | 43  | 929516  | 264508  | 0 | 3  | 0 | 0 | 50 | 65 | 24059548 | 3.75E-01 | 1 |
| C15orf53 | 98316   | 561  | 20  | 447492  | 135636  | 0 | 2  | 0 | 0 | 50 | 51 | 20027492 | 3.75E-01 | 1 |
| APOM     | 2517236 | 193  | 20  | 497688  | 131364  | 0 | 2  | 0 | 0 | 50 | 63 | 27465044 | 3.75E-01 | 1 |
| MMP28    | 647610  | 144  | 6   | 1307588 | 403348  | 0 | 3  | 1 | 0 | 50 | 44 | 20788264 | 3.75E-01 | 1 |
| GNPTG    | 1211641 | 215  | 40  | 808832  | 218584  | 0 | 3  | 1 | 0 | 50 | 64 | 21318348 | 3.75E-01 | 1 |
| RBM47    | 247828  | 341  | 64  | 1472772 | 447492  | 0 | 10 | 3 | 0 | 11 | 16 | 4404076  | 3.75E-01 | 1 |
| ZFP57    | 484408  | 755  | 34  | 1368464 | 364900  | 0 | 5  | 2 | 0 | 50 | 51 | 18249272 | 3.75E-01 | 1 |
| VAR52    | 2223866 | 223  | 25  | 2787480 | 847992  | 0 | 11 | 2 | 0 | 50 | 73 | 23168480 | 3.75E-01 | 1 |



|          |         |     |     |         |         |   |    |   |   |    |    |          |          |   |
|----------|---------|-----|-----|---------|---------|---|----|---|---|----|----|----------|----------|---|
| SAP30    | 249666  | 413 | 23  | 556784  | 164116  | 0 | 3  | 0 | 0 | 50 | 49 | 18449700 | 3.75E-01 | 1 |
| NOTCH3   | 630378  | 381 | 11  | 5794612 | 1783916 | 0 | 12 | 2 | 0 | 5  | 2  | 3166264  | 3.75E-01 | 1 |
| GIP      | 793101  | 174 | 29  | 401924  | 112852  | 0 | 2  | 0 | 0 | 50 | 65 | 22956304 | 3.75E-01 | 1 |
| HSPB11   | 467936  | 174 | 27  | 394804  | 93272   | 0 | 2  | 0 | 0 | 50 | 71 | 22598168 | 3.75E-01 | 1 |
| IFNW1    | 137739  | 498 | 1   | 488788  | 139196  | 0 | 2  | 1 | 0 | 8  | 11 | 3212900  | 3.75E-01 | 1 |
| RGS1     | 269711  | 604 | -12 | 554648  | 137416  | 0 | 2  | 0 | 0 | 50 | 38 | 18560772 | 3.76E-01 | 1 |
| F7       | 789162  | 285 | 14  | 1188328 | 344252  | 0 | 7  | 0 | 0 | 37 | 59 | 17973016 | 3.76E-01 | 1 |
| UBXN11   | 1021101 | 217 | 22  | 1341764 | 389464  | 0 | 4  | 1 | 0 | 12 | 5  | 2705244  | 3.76E-01 | 1 |
| OSMR     | 193286  | 381 | -10 | 2589188 | 661804  | 0 | 8  | 2 | 0 | 36 | 28 | 15880804 | 3.76E-01 | 1 |
| PFDN6    | 1456953 | 262 | 30  | 341760  | 96120   | 0 | 2  | 0 | 0 | 50 | 71 | 20945260 | 3.76E-01 | 1 |
| EBPL     | 425192  | 296 | 62  | 521896  | 156284  | 0 | 1  | 0 | 0 | 50 | 48 | 18413032 | 3.76E-01 | 1 |
| CLEC9A   | 351158  | 445 | 9   | 654684  | 146316  | 0 | 3  | 0 | 0 | 50 | 55 | 20981572 | 3.76E-01 | 1 |
| DNAJB12  | 822407  | 145 | 45  | 1045928 | 301888  | 0 | 3  | 2 | 0 | 50 | 63 | 23074140 | 3.76E-01 | 1 |
| PIGZ     | 754196  | 306 | 29  | 1373804 | 490924  | 0 | 2  | 0 | 0 | 46 | 36 | 22808920 | 3.76E-01 | 1 |
| CYP4Z1   | 366455  | 479 | 4   | 1338204 | 332148  | 0 | 4  | 1 | 0 | 50 | 52 | 19874412 | 3.76E-01 | 1 |
| C8orf22  | 15071   | 631 | -19 | 224636  | 55180   | 0 | 1  | 0 | 0 | 50 | 46 | 19123252 | 3.76E-01 | 1 |
| LILRA5   | 742939  | 507 | -9  | 838736  | 242080  | 0 | 3  | 1 | 0 | 50 | 62 | 17969100 | 3.77E-01 | 1 |
| SDPR     | 158359  | 484 | 4   | 1070136 | 299040  | 0 | 6  | 0 | 0 | 50 | 57 | 17303736 | 3.77E-01 | 1 |
| CPLX3    | 764533  | 195 | 46  | 409400  | 110716  | 0 | 3  | 1 | 0 | 11 | 14 | 2513716  | 3.77E-01 | 1 |
| ABCB6    | 773232  | 177 | 36  | 2117132 | 660736  | 0 | 6  | 1 | 0 | 12 | 9  | 4375240  | 3.77E-01 | 1 |
| CTAGE1   | 162557  | 417 | -9  | 1881816 | 508368  | 0 | 6  | 3 | 0 | 50 | 51 | 20812472 | 3.77E-01 | 1 |
| LEMD1    | 662921  | 249 | 41  | 286224  | 75828   | 0 | 2  | 0 | 0 | 9  | 16 | 4452848  | 3.77E-01 | 1 |
| FAM81A   | 613635  | 188 | 39  | 977932  | 238520  | 0 | 2  | 0 | 0 | 50 | 45 | 20606704 | 3.77E-01 | 1 |
| SLC25A31 | 220342  | 437 | -6  | 801356  | 232468  | 0 | 3  | 1 | 0 | 50 | 46 | 20279540 | 3.77E-01 | 1 |
| WIF1     | 344729  | 671 | -9  | 997868  | 258100  | 0 | 3  | 1 | 0 | 50 | 56 | 20297696 | 3.77E-01 | 1 |
| STX12    | 726175  | 202 | 30  | 742616  | 179068  | 0 | 3  | 0 | 0 | 50 | 40 | 18909296 | 3.77E-01 | 1 |
| C11orf58 | 466700  | 635 | -21 | 493060  | 113564  | 0 | 2  | 0 | 0 | 50 | 43 | 17511996 | 3.77E-01 | 1 |
| ZNF33B   | 204176  | 890 | -35 | 2038812 | 474192  | 0 | 8  | 2 | 0 | 20 | 18 | 5830212  | 3.77E-01 | 1 |
| GLIS1    | 598664  | 391 | 27  | 1530444 | 493416  | 0 | 7  | 2 | 0 | 14 | 14 | 5594184  | 3.77E-01 | 1 |
| TBC1D5   | 103389  | 701 | 9   | 2161988 | 548596  | 0 | 7  | 3 | 0 | 50 | 73 | 29919308 | 3.77E-01 | 1 |
| ADH1B    | 332785  | 854 | 8   | 961912  | 279104  | 0 | 4  | 1 | 0 | 50 | 70 | 20070924 | 3.77E-01 | 1 |
| NEDD9    | 228484  | 418 | 30  | 2171600 | 616948  | 0 | 6  | 3 | 0 | 45 | 55 | 22672216 | 3.77E-01 | 1 |
| RELL2    | 771583  | 353 | 25  | 771096  | 231756  | 0 | 3  | 1 | 0 | 50 | 53 | 22992260 | 3.77E-01 | 1 |

|          |         |      |     |         |         |   |    |   |   |    |     |          |          |   |
|----------|---------|------|-----|---------|---------|---|----|---|---|----|-----|----------|----------|---|
| DEFB135  | 467502  | 451  | 22  | 199360  | 54824   | 0 | 1  | 0 | 0 | 50 | 58  | 22225080 | 3.78E-01 | 1 |
| RAD51    | 1017781 | 161  | 47  | 991460  | 269848  | 0 | 5  | 0 | 0 | 50 | 49  | 19609192 | 3.78E-01 | 1 |
| DYX1C1   | 298473  | 405  | 1   | 1218588 | 272340  | 0 | 3  | 1 | 0 | 50 | 51  | 20321192 | 3.78E-01 | 1 |
| PCNA     | 497537  | 385  | 25  | 682096  | 178712  | 0 | 4  | 0 | 0 | 6  | 4   | 2221084  | 3.78E-01 | 1 |
| RAPGEF2  | 136300  | 480  | 3   | 3860108 | 1044148 | 0 | 14 | 1 | 0 | 6  | 4   | 2477760  | 3.78E-01 | 1 |
| ACVR1    | 81110   | 935  | 2   | 1323608 | 348880  | 0 | 5  | 0 | 0 | 30 | 17  | 9593844  | 3.78E-01 | 1 |
| GAB2     | 404872  | 408  | 19  | 1719124 | 490568  | 0 | 6  | 0 | 0 | 28 | 23  | 12087624 | 3.78E-01 | 1 |
| MAGEE2   | 117293  | NaN  | -10 | 1312928 | 365968  | 0 | 4  | 1 | 0 | 50 | 75  | 26941724 | 3.78E-01 | 1 |
| GLB1L3   | 270350  | 623  | 21  | 1716632 | 459952  | 0 | 10 | 1 | 0 | 3  | 2   | 1141336  | 3.78E-01 | 1 |
| LY6G5B   | 2517236 | 193  | 20  | 505876  | 149876  | 0 | 2  | 0 | 0 | 50 | 63  | 27465044 | 3.78E-01 | 1 |
| SLC13A3  | 293732  | 642  | 28  | 1521188 | 464224  | 0 | 6  | 1 | 0 | 34 | 40  | 15928864 | 3.78E-01 | 1 |
| MYBL1    | 329076  | 140  | 37  | 1979004 | 497688  | 0 | 6  | 2 | 0 | 50 | 56  | 19224712 | 3.79E-01 | 1 |
| UPK1A    | 1162794 | 390  | 27  | 664652  | 190816  | 0 | 2  | 1 | 0 | 50 | 66  | 20625572 | 3.79E-01 | 1 |
| SSBP1    | 200522  | 844  | 14  | 402992  | 101104  | 0 | 2  | 1 | 0 | 5  | 4   | 1324676  | 3.79E-01 | 1 |
| SGTB     | 414857  | 242  | 34  | 824852  | 195088  | 0 | 3  | 0 | 0 | 50 | 59  | 20100116 | 3.79E-01 | 1 |
| ARSH     | 218545  | NaN  | -4  | 1433256 | 403704  | 0 | 5  | 2 | 0 | 29 | 28  | 10056288 | 3.79E-01 | 1 |
| TP53INP2 | 1047752 | 147  | 47  | 542900  | 178000  | 0 | 2  | 0 | 0 | 50 | 49  | 23319068 | 3.79E-01 | 1 |
| GNPDA1   | 696239  | 321  | 48  | 763620  | 191172  | 0 | 3  | 1 | 0 | 50 | 50  | 19214032 | 3.79E-01 | 1 |
| CATSPER1 | 394439  | 483  | 26  | 2938068 | 749736  | 0 | 10 | 2 | 0 | 8  | 10  | 5757232  | 3.79E-01 | 1 |
| EAPP     | 517394  | 165  | 13  | 759704  | 178000  | 0 | 4  | 0 | 0 | 50 | 54  | 17852332 | 3.79E-01 | 1 |
| SIX3     | 133317  | 566  | 23  | 805984  | 265220  | 0 | 4  | 0 | 0 | 50 | 54  | 20448284 | 3.80E-01 | 1 |
| MSMP     | 922448  | 190  | 48  | 355644  | 101460  | 0 | 2  | 0 | 0 | 50 | 73  | 21892576 | 3.80E-01 | 1 |
| ABI1     | 342602  | 447  | 30  | 1342476 | 394092  | 0 | 5  | 0 | 0 | 50 | 42  | 23330104 | 3.80E-01 | 1 |
| LRG1     | 2111443 | 278  | 43  | 835176  | 286224  | 0 | 5  | 1 | 0 | 50 | 77  | 21475344 | 3.80E-01 | 1 |
| ADCY2    | 60911   | 1014 | -22 | 2826640 | 776792  | 0 | 18 | 7 | 0 | 16 | 53  | 10642264 | 3.80E-01 | 1 |
| GTF2B    | 284162  | 537  | 1   | 813816  | 227484  | 0 | 2  | 1 | 0 | 50 | 57  | 19403424 | 3.80E-01 | 1 |
| IFNG     | 268405  | 717  | -2  | 445712  | 102172  | 0 | 2  | 0 | 0 | 50 | 64  | 22567908 | 3.80E-01 | 1 |
| FPR2     | 436280  | 690  | -24 | 857248  | 274832  | 0 | 5  | 2 | 0 | 50 | 53  | 16569308 | 3.80E-01 | 1 |
| INO80E   | NaN     | NaN  | NaN | 618728  | 196156  | 0 | 3  | 0 | 0 | 50 | 116 | 39841740 | 3.80E-01 | 1 |
| PTTG1    | 197504  | 619  | 30  | 525812  | 148096  | 0 | 2  | 0 | 0 | 10 | 11  | 3393392  | 3.80E-01 | 1 |
| OR6B1    | 222080  | 812  | -11 | 767180  | 232468  | 0 | 5  | 2 | 0 | 11 | 16  | 3490580  | 3.80E-01 | 1 |
| GLIPR1L1 | 112974  | 692  | -33 | 615880  | 153080  | 0 | 2  | 0 | 0 | 50 | 102 | 25765500 | 3.81E-01 | 1 |
| SLC13A2  | 1517567 | 225  | 24  | 1609476 | 496620  | 0 | 4  | 2 | 0 | 50 | 49  | 17603488 | 3.81E-01 | 1 |

|          |         |      |     |         |         |   |    |   |   |    |     |          |          |   |
|----------|---------|------|-----|---------|---------|---|----|---|---|----|-----|----------|----------|---|
| OSM      | 548674  | 211  | 43  | 625848  | 195444  | 0 | 3  | 0 | 0 | 50 | 54  | 19921048 | 3.81E-01 | 1 |
| GAN      | 316209  | 160  | 14  | 1546108 | 412604  | 0 | 5  | 1 | 0 | 50 | 42  | 19446500 | 3.81E-01 | 1 |
| FAM198B  | 123627  | 849  | -14 | 1378788 | 412248  | 0 | 7  | 0 | 0 | 33 | 46  | 16700672 | 3.81E-01 | 1 |
| PCGF1    | 1019591 | 315  | 50  | 695980  | 175508  | 0 | 2  | 0 | 0 | 50 | 69  | 21835972 | 3.81E-01 | 1 |
| UBD      | 403531  | 798  | 18  | 417588  | 118548  | 0 | 2  | 1 | 0 | 8  | 6   | 2025640  | 3.81E-01 | 1 |
| GNG2     | 204232  | 471  | 27  | 190460  | 48772   | 0 | 1  | 0 | 0 | 50 | 49  | 18536564 | 3.81E-01 | 1 |
| PRR3     | 2080582 | 271  | 32  | 477040  | 141332  | 0 | 1  | 1 | 0 | 25 | 33  | 11740168 | 3.81E-01 | 1 |
| TAL2     | 215119  | 773  | -2  | 270916  | 80456   | 0 | 1  | 0 | 0 | 50 | 37  | 21261388 | 3.81E-01 | 1 |
| CD22     | 767113  | 472  | 9   | 2189044 | 583484  | 0 | 6  | 1 | 0 | 32 | 25  | 10097228 | 3.81E-01 | 1 |
| IL23A    | 2869106 | 184  | 52  | 477396  | 144180  | 0 | 1  | 0 | 0 | 50 | 84  | 25337232 | 3.81E-01 | 1 |
| VTA1     | 169555  | 426  | -15 | 808120  | 210752  | 0 | 4  | 0 | 0 | 50 | 50  | 19754084 | 3.82E-01 | 1 |
| SPG20    | 137590  | 850  | -16 | 1695628 | 475616  | 0 | 6  | 2 | 0 | 25 | 38  | 11906420 | 3.82E-01 | 1 |
| TMEM8B   | 847663  | 227  | 54  | 1335000 | 426132  | 0 | 5  | 1 | 0 | 50 | 66  | 20654408 | 3.82E-01 | 1 |
| PTMS     | 2816186 | 232  | 48  | 286580  | 60520   | 0 | 1  | 1 | 0 | 5  | 24  | 5354240  | 3.82E-01 | 1 |
| MXRA7    | 913566  | 191  | 26  | 559276  | 171236  | 0 | 3  | 0 | 0 | 50 | 73  | 22697492 | 3.82E-01 | 1 |
| RBL1     | 822888  | 309  | 42  | 2782140 | 742260  | 0 | 10 | 3 | 0 | 36 | 45  | 15768664 | 3.82E-01 | 1 |
| CYP7B1   | 8894    | 1018 | 22  | 1299044 | 346744  | 0 | 4  | 1 | 0 | 50 | 55  | 21157080 | 3.82E-01 | 1 |
| CAND1    | 237289  | 810  | -13 | 3131376 | 872556  | 0 | 12 | 3 | 0 | 45 | 62  | 16895760 | 3.82E-01 | 1 |
| COL8A1   | 226950  | 419  | -2  | 1766116 | 629408  | 0 | 3  | 1 | 0 | 50 | 45  | 20219020 | 3.82E-01 | 1 |
| ADAMTSL  | 112410  | 888  | -7  | 4369544 | 1175512 | 0 | 16 | 5 | 0 | 28 | 43  | 14694968 | 3.82E-01 | 1 |
| TRMU     | 493681  | 260  | 39  | 1103600 | 291208  | 0 | 2  | 0 | 0 | 50 | 40  | 19939560 | 3.82E-01 | 1 |
| CHAF1A   | 2078211 | 278  | 37  | 2458536 | 669636  | 0 | 8  | 3 | 0 | 50 | 53  | 23615972 | 3.82E-01 | 1 |
| MESDC2   | 265620  | 516  | -2  | 596656  | 166964  | 0 | 3  | 1 | 0 | 50 | 59  | 19197300 | 3.82E-01 | 1 |
| Clorf131 | 383866  | 603  | 14  | 767536  | 204344  | 0 | 2  | 0 | 0 | 50 | 71  | 23732384 | 3.82E-01 | 1 |
| ACIN1    | 1261207 | 185  | 41  | 3504464 | 1031332 | 0 | 15 | 2 | 0 | 2  | 2   | 1796020  | 3.82E-01 | 1 |
| IGF1     | 186749  | 752  | -3  | 581348  | 143824  | 0 | 2  | 0 | 0 | 50 | 44  | 21730240 | 3.82E-01 | 1 |
| ZFP41    | 1657385 | 389  | 19  | 505876  | 131720  | 0 | 3  | 0 | 0 | 50 | 72  | 20208696 | 3.83E-01 | 1 |
| BCL9     | NaN     | NaN  | NaN | 3502684 | 1095056 | 0 | 14 | 4 | 0 | 50 | 120 | 40740640 | 3.83E-01 | 1 |
| EPHB2    | 568787  | 464  | 29  | 2524040 | 705592  | 0 | 8  | 2 | 0 | 36 | 44  | 17671128 | 3.83E-01 | 1 |
| CCDC43   | 1297937 | 254  | 27  | 588468  | 151656  | 0 | 1  | 0 | 0 | 50 | 53  | 19790752 | 3.83E-01 | 1 |
| NRSN1    | 349698  | 825  | -21 | 491636  | 144892  | 0 | 3  | 0 | 0 | 50 | 61  | 17342184 | 3.83E-01 | 1 |
| MAGEC1   | 17504   | NaN  | -11 | 2828420 | 839092  | 0 | 20 | 3 | 0 | 3  | 12  | 2826996  | 3.83E-01 | 1 |
| ACOT6    | 606300  | 169  | 39  | 529372  | 143468  | 0 | 2  | 0 | 0 | 50 | 45  | 20608840 | 3.83E-01 | 1 |

|         |         |      |     |         |         |   |    |   |   |    |    |          |          |   |
|---------|---------|------|-----|---------|---------|---|----|---|---|----|----|----------|----------|---|
| CCT5    | 623675  | 325  | 5   | 1400860 | 378428  | 0 | 6  | 1 | 0 | 50 | 72 | 28009724 | 3.83E-01 | 1 |
| GCM1    | 414446  | 329  | 20  | 1123892 | 293344  | 0 | 4  | 0 | 0 | 13 | 10 | 6164496  | 3.83E-01 | 1 |
| ASB6    | 794813  | 198  | 40  | 1099328 | 274120  | 0 | 4  | 0 | 0 | 43 | 45 | 15816012 | 3.83E-01 | 1 |
| CYP3A43 | 1535089 | 438  | 36  | 1336424 | 333928  | 0 | 6  | 1 | 0 | 19 | 25 | 6683188  | 3.83E-01 | 1 |
| WNT3A   | 688142  | 391  | 0   | 891068  | 254896  | 0 | 2  | 0 | 0 | 50 | 41 | 18571096 | 3.83E-01 | 1 |
| PLRG1   | 59883   | 1034 | 20  | 1356004 | 356000  | 0 | 5  | 0 | 0 | 50 | 39 | 19125032 | 3.83E-01 | 1 |
| NCALD   | 362848  | 629  | 41  | 512996  | 121396  | 0 | 1  | 1 | 0 | 50 | 62 | 19739844 | 3.83E-01 | 1 |
| NRG1    | 28018   | 952  | -32 | 3055192 | 875048  | 0 | 11 | 0 | 0 | 2  | 2  | 1568536  | 3.83E-01 | 1 |
| CYB5R1  | 421206  | 389  | 30  | 780352  | 236384  | 0 | 3  | 2 | 0 | 32 | 42 | 11558252 | 3.84E-01 | 1 |
| CSMD3   | 9197    | 1295 | -29 | 9668604 | 2579220 | 0 | 60 | 9 | 0 | 1  | 9  | 2892500  | 3.84E-01 | 1 |
| PRKAA1  | 211936  | 496  | -11 | 1493064 | 389820  | 0 | 6  | 0 | 0 | 14 | 10 | 5635836  | 3.84E-01 | 1 |
| NXPH2   | 69057   | 672  | -4  | 665364  | 187968  | 0 | 3  | 0 | 0 | 50 | 69 | 21528388 | 3.84E-01 | 1 |
| C8orf4  | 10573   | 360  | 3   | 270916  | 74048   | 0 | 1  | 0 | 0 | 50 | 35 | 20692500 | 3.84E-01 | 1 |
| PKIB    | 139315  | 1035 | -16 | 205768  | 55892   | 0 | 1  | 0 | 0 | 50 | 50 | 20414820 | 3.84E-01 | 1 |
| L3MBTL2 | 1301913 | 179  | 53  | 1870780 | 494840  | 0 | 5  | 1 | 0 | 37 | 34 | 14111128 | 3.84E-01 | 1 |
| MARK1   | 544426  | 520  | -9  | 2064088 | 558920  | 0 | 10 | 2 | 0 | 50 | 56 | 17907868 | 3.84E-01 | 1 |
| MAGEA6  | 203033  | NaN  | -1  | 782844  | 230688  | 0 | 3  | 0 | 0 | 50 | 57 | 23840964 | 3.84E-01 | 1 |
| KLC4    | 1239021 | 301  | 42  | 1685304 | 494484  | 0 | 4  | 0 | 0 | 3  | 9  | 3514432  | 3.84E-01 | 1 |
| EIF3D   | 1184089 | 359  | 38  | 1462092 | 356712  | 0 | 5  | 0 | 0 | 16 | 20 | 6049864  | 3.84E-01 | 1 |
| CLDN6   | 1443513 | 234  | 49  | 527592  | 184764  | 0 | 1  | 0 | 0 | 50 | 48 | 18953440 | 3.85E-01 | 1 |
| AMZ2    | 764688  | 237  | 11  | 940552  | 239588  | 0 | 5  | 0 | 0 | 50 | 65 | 21730952 | 3.85E-01 | 1 |
| NEUROD4 | 115336  | 828  | 15  | 830904  | 237096  | 0 | 3  | 0 | 0 | 50 | 48 | 19378504 | 3.85E-01 | 1 |
| FAM50A  | 2277674 | NaN  | 40  | 935212  | 207548  | 0 | 2  | 0 | 0 | 50 | 46 | 20570392 | 3.85E-01 | 1 |
| MAP3K2  | 435982  | 175  | 26  | 1632260 | 420436  | 0 | 5  | 2 | 0 | 43 | 69 | 20985132 | 3.85E-01 | 1 |
| PPP3R2  | 112839  | 1008 | -11 | 444644  | 114988  | 0 | 2  | 0 | 0 | 50 | 58 | 22010056 | 3.85E-01 | 1 |
| KLHL5   | 497247  | 209  | 46  | 1938776 | 526168  | 0 | 5  | 0 | 0 | 10 | 10 | 4782504  | 3.85E-01 | 1 |
| SLC40A1 | 446631  | 511  | -2  | 1433612 | 428980  | 0 | 5  | 2 | 0 | 46 | 63 | 19923896 | 3.85E-01 | 1 |
| ZNF700  | 719617  | 678  | -1  | 1934860 | 458528  | 0 | 9  | 3 | 0 | 19 | 18 | 5988632  | 3.86E-01 | 1 |
| CGGBP1  | 123235  | 894  | -3  | 418656  | 123888  | 0 | 2  | 0 | 0 | 50 | 48 | 17285580 | 3.86E-01 | 1 |
| PSMC6   | 314095  | 313  | 11  | 1076544 | 273408  | 0 | 5  | 1 | 0 | 50 | 46 | 19692852 | 3.86E-01 | 1 |
| ATF1    | 665195  | 250  | 42  | 695268  | 201852  | 0 | 2  | 1 | 0 | 17 | 22 | 7365996  | 3.86E-01 | 1 |
| TCEAL3  | 490345  | NaN  | 31  | 517268  | 131008  | 0 | 1  | 0 | 0 | 50 | 66 | 22114364 | 3.86E-01 | 1 |
| AEN     | 393645  | 605  | 14  | 812392  | 244928  | 0 | 4  | 1 | 0 | 50 | 62 | 21951672 | 3.86E-01 | 1 |

|           |         |     |     |         |         |   |    |   |   |    |     |          |          |   |
|-----------|---------|-----|-----|---------|---------|---|----|---|---|----|-----|----------|----------|---|
| SLC10A1   | 610490  | 333 | 47  | 874336  | 264152  | 0 | 2  | 1 | 0 | 50 | 50  | 20003640 | 3.86E-01 | 1 |
| MEI1      | 1452842 | 180 | 49  | 3261672 | 953724  | 0 | 8  | 2 | 0 | 25 | 27  | 10904992 | 3.86E-01 | 1 |
| WIPF2     | 1491292 | 165 | 30  | 1071916 | 370952  | 0 | 6  | 1 | 0 | 16 | 39  | 10107908 | 3.86E-01 | 1 |
| PDCD4     | 340524  | 254 | 9   | 1243152 | 326808  | 0 | 5  | 1 | 0 | 50 | 47  | 22267800 | 3.86E-01 | 1 |
| CYB5B     | 1161561 | NaN | 46  | 399432  | 103596  | 0 | 2  | 0 | 0 | 50 | 61  | 20730592 | 3.86E-01 | 1 |
| MIER1     | 331801  | 635 | -9  | 1652552 | 379852  | 0 | 10 | 0 | 0 | 9  | 7   | 2520124  | 3.86E-01 | 1 |
| CYP3A5    | 1395063 | 430 | 34  | 1312928 | 352084  | 0 | 7  | 3 | 0 | 29 | 34  | 10155968 | 3.86E-01 | 1 |
| TMED7     | NaN     | NaN | NaN | 564260  | 165184  | 0 | 3  | 0 | 0 | 50 | 116 | 39810768 | 3.86E-01 | 1 |
| RWDD2A    | 153997  | 734 | 6   | 749380  | 193664  | 0 | 2  | 0 | 0 | 50 | 75  | 24558660 | 3.86E-01 | 1 |
| AKR1C2    | 343868  | 608 | -13 | 892492  | 238520  | 0 | 2  | 1 | 0 | 50 | 33  | 15973720 | 3.86E-01 | 1 |
| DPM1      | 386595  | 367 | 36  | 687792  | 182628  | 0 | 3  | 0 | 0 | 50 | 59  | 21407704 | 3.86E-01 | 1 |
| RBM28     | 906031  | 255 | 22  | 2008908 | 503028  | 0 | 6  | 2 | 0 | 50 | 54  | 19048492 | 3.87E-01 | 1 |
| ZBED2     | 188186  | 406 | -14 | 549664  | 152012  | 0 | 2  | 0 | 0 | 50 | 47  | 21927820 | 3.87E-01 | 1 |
| DEFB116   | 562665  | 594 | -29 | 269136  | 64080   | 0 | 1  | 0 | 0 | 50 | 50  | 17157064 | 3.87E-01 | 1 |
| LRRC7     | 298237  | 695 | -26 | 3967264 | 1065152 | 0 | 21 | 7 | 0 | 14 | 30  | 7398036  | 3.87E-01 | 1 |
| PCDHGC3   | 665835  | 568 | 9   | 2401932 | 779640  | 0 | 7  | 0 | 0 | 7  | 4   | 3452488  | 3.87E-01 | 1 |
| USMG5     | 545643  | 147 | 45  | 160556  | 41296   | 0 | 1  | 0 | 0 | 50 | 60  | 18601000 | 3.87E-01 | 1 |
| SAE1      | 1351246 | 165 | 36  | 998936  | 226060  | 0 | 5  | 2 | 0 | 11 | 18  | 6484896  | 3.87E-01 | 1 |
| GJD2      | 521214  | 306 | -1  | 794236  | 241724  | 0 | 4  | 1 | 0 | 50 | 69  | 23359652 | 3.87E-01 | 1 |
| TRAM2     | 421188  | 378 | 33  | 971168  | 260236  | 0 | 5  | 0 | 0 | 50 | 59  | 19057036 | 3.87E-01 | 1 |
| C22orf29  | NaN     | NaN | NaN | 882168  | 287292  | 0 | 3  | 2 | 0 | 50 | 118 | 39932876 | 3.88E-01 | 1 |
| FBXO42    | 788646  | 186 | 42  | 1807056 | 531864  | 0 | 12 | 4 | 0 | 20 | 31  | 7497716  | 3.88E-01 | 1 |
| KIF15     | 434707  | 426 | 26  | 3693500 | 902104  | 0 | 14 | 1 | 0 | 21 | 15  | 8254928  | 3.88E-01 | 1 |
| NKAP      | 772178  | NaN | 38  | 1076188 | 290852  | 0 | 5  | 1 | 0 | 50 | 59  | 22592472 | 3.88E-01 | 1 |
| CSDE1     | 600480  | 472 | 3   | 2199012 | 589536  | 0 | 7  | 1 | 0 | 28 | 25  | 9556108  | 3.88E-01 | 1 |
| DNAJB6    | 318088  | 174 | 22  | 888220  | 233180  | 0 | 3  | 2 | 0 | 12 | 15  | 6298352  | 3.88E-01 | 1 |
| C10orf113 | NaN     | NaN | NaN | 436812  | 108936  | 0 | 1  | 0 | 0 | 50 | 116 | 39754520 | 3.88E-01 | 1 |
| IRF7      | 1774224 | 236 | 57  | 1295840 | 420436  | 0 | 4  | 0 | 0 | 4  | 3   | 2271636  | 3.88E-01 | 1 |
| EMP2      | 228675  | 175 | 8   | 439660  | 115700  | 0 | 2  | 1 | 0 | 50 | 56  | 20127528 | 3.88E-01 | 1 |
| VAMP3     | 364696  | 422 | 22  | 271628  | 69064   | 0 | 1  | 0 | 0 | 50 | 53  | 25431216 | 3.88E-01 | 1 |
| PSMD4     | 1256374 | 184 | 31  | 979356  | 272340  | 0 | 4  | 1 | 0 | 50 | 80  | 21461104 | 3.89E-01 | 1 |
| LIPE      | 704668  | 235 | 34  | 2624788 | 864368  | 0 | 10 | 4 | 0 | 29 | 30  | 11887908 | 3.89E-01 | 1 |
| C12orf43  | 1225663 | 380 | 40  | 678180  | 187968  | 0 | 6  | 0 | 0 | 9  | 17  | 4080828  | 3.89E-01 | 1 |

|         |         |     |     |         |         |   |    |    |   |    |    |          |          |   |
|---------|---------|-----|-----|---------|---------|---|----|----|---|----|----|----------|----------|---|
| KIF1B   | 712477  | 306 | 25  | 5904616 | 1554296 | 0 | 16 | 4  | 0 | 18 | 29 | 11993996 | 3.89E-01 | 1 |
| VPS45   | 1181361 | 309 | 32  | 1488792 | 400500  | 0 | 3  | 0  | 0 | 8  | 6  | 5439680  | 3.90E-01 | 1 |
| PDE6H   | 380047  | 476 | 8   | 224280  | 57672   | 0 | 1  | 0  | 0 | 50 | 53 | 20585700 | 3.90E-01 | 1 |
| TMEM63B | 1267618 | 203 | 51  | 2165904 | 601284  | 0 | 6  | 0  | 0 | 35 | 27 | 14162036 | 3.90E-01 | 1 |
| DNAJB4  | 373296  | 256 | 1   | 859740  | 231756  | 0 | 2  | 0  | 0 | 50 | 64 | 25505620 | 3.90E-01 | 1 |
| HNRNPH1 | 1600541 | 229 | 28  | 1197584 | 297616  | 0 | 5  | 0  | 0 | 50 | 69 | 21106528 | 3.90E-01 | 1 |
| AKR7L   | 799326  | 448 | 35  | 904240  | 185120  | 0 | 2  | 0  | 0 | 50 | 58 | 24547268 | 3.91E-01 | 1 |
| PAR6B   | 480540  | 161 | 43  | 939484  | 264152  | 0 | 4  | 0  | 0 | 50 | 41 | 16432248 | 3.91E-01 | 1 |
| MYL6B   | 2878044 | 171 | 40  | 552156  | 147384  | 0 | 1  | 1  | 0 | 42 | 54 | 17538340 | 3.91E-01 | 1 |
| TRIM27  | 161027  | 558 | 30  | 1318268 | 358492  | 0 | 5  | 2  | 0 | 50 | 63 | 22594608 | 3.91E-01 | 1 |
| HTR4    | 89834   | 578 | 10  | 1235320 | 350660  | 0 | 5  | 1  | 0 | 50 | 61 | 24091944 | 3.91E-01 | 1 |
| MEM167E | 989913  | 215 | 18  | 196512  | 54468   | 0 | 1  | 0  | 0 | 50 | 45 | 17234672 | 3.91E-01 | 1 |
| IL11RA  | 731413  | 298 | 51  | 1069424 | 339268  | 0 | 3  | 1  | 0 | 50 | 42 | 16261368 | 3.91E-01 | 1 |
| ZNF300  | 944830  | 396 | 32  | 1609476 | 401568  | 0 | 4  | 0  | 0 | 41 | 29 | 14463924 | 3.91E-01 | 1 |
| PIG     | 345417  | 404 | 38  | 2016028 | 454256  | 0 | 8  | 1  | 0 | 50 | 58 | 21563632 | 3.92E-01 | 1 |
| UBE3B   | 430972  | 428 | 37  | 2766832 | 769316  | 0 | 11 | 5  | 0 | 50 | 70 | 22063100 | 3.92E-01 | 1 |
| CD34    | 320873  | 450 | 22  | 980068  | 304736  | 0 | 3  | 2  | 0 | 50 | 92 | 29080216 | 3.92E-01 | 1 |
| MAN1A2  | 358073  | 526 | 6   | 1661096 | 447136  | 0 | 6  | 2  | 0 | 50 | 50 | 19700328 | 3.92E-01 | 1 |
| FAM9C   | 209806  | NaN | 58  | 468140  | 96832   | 0 | 2  | 1  | 0 | 50 | 63 | 24610280 | 3.92E-01 | 1 |
| TAAR9   | 178165  | 618 | 22  | 868284  | 249912  | 0 | 2  | 0  | 0 | 42 | 38 | 17775792 | 3.92E-01 | 1 |
| PROX1   | 347543  | 799 | -22 | 1867932 | 513708  | 0 | 11 | 4  | 0 | 50 | 51 | 15458588 | 3.92E-01 | 1 |
| ADH1A   | 250334  | 786 | 3   | 969032  | 271984  | 0 | 4  | 0  | 0 | 50 | 52 | 20458608 | 3.92E-01 | 1 |
| HAPLN2  | 2049505 | 180 | 37  | 843008  | 270916  | 0 | 3  | 1  | 0 | 50 | 64 | 19075904 | 3.93E-01 | 1 |
| PAF1    | 1748498 | 252 | 32  | 1424712 | 335352  | 0 | 5  | 1  | 0 | 27 | 41 | 14226472 | 3.93E-01 | 1 |
| CYP2C18 | 250078  | 725 | 1   | 1274124 | 333216  | 0 | 6  | 0  | 0 | 50 | 63 | 23371400 | 3.93E-01 | 1 |
| ZFP37   | 492947  | 575 | -4  | 1641516 | 395160  | 0 | 14 | 3  | 0 | 4  | 6  | 1415456  | 3.93E-01 | 1 |
| MRPS7   | 1723762 | 171 | 31  | 622288  | 173372  | 0 | 3  | 1  | 0 | 50 | 81 | 19557572 | 3.93E-01 | 1 |
| CSTB    | 919787  | 170 | 68  | 259168  | 66572   | 0 | 1  | 0  | 0 | 50 | 49 | 19469996 | 3.93E-01 | 1 |
| FSCB    | 131880  | 932 | -58 | 2006416 | 640088  | 0 | 5  | 0  | 0 | 27 | 27 | 10754404 | 3.93E-01 | 1 |
| UTRN    | 183454  | 750 | 11  | 9044536 | 2271992 | 0 | 38 | 10 | 0 | 50 | 55 | 20787908 | 3.94E-01 | 1 |
| FOXJ2   | 139049  | 167 | 22  | 1470280 | 414740  | 0 | 6  | 1  | 0 | 50 | 47 | 21582856 | 3.94E-01 | 1 |
| CEP63   | 222647  | 321 | 12  | 1952304 | 470988  | 0 | 6  | 0  | 0 | 3  | 1  | 2055900  | 3.94E-01 | 1 |
| STXBP6  | 259495  | 800 | -3  | 560700  | 136704  | 0 | 2  | 0  | 0 | 50 | 42 | 20138920 | 3.94E-01 | 1 |

|          |         |      |     |         |         |   |    |   |   |    |    |          |          |   |
|----------|---------|------|-----|---------|---------|---|----|---|---|----|----|----------|----------|---|
| PCMTD2   | 442044  | 440  | 43  | 926668  | 254540  | 0 | 3  | 1 | 0 | 50 | 70 | 24395256 | 3.94E-01 | 1 |
| BRSK1    | 1032110 | 209  | 12  | 1968680 | 604132  | 0 | 7  | 2 | 0 | 17 | 18 | 6309744  | 3.94E-01 | 1 |
| PRKCSH   | 1255985 | 265  | 32  | 1428272 | 361696  | 0 | 6  | 0 | 0 | 33 | 38 | 12400192 | 3.94E-01 | 1 |
| ATP6V1D  | 484235  | 291  | 32  | 655752  | 173016  | 0 | 1  | 0 | 0 | 50 | 43 | 17771164 | 3.94E-01 | 1 |
| DHDDS    | 1046693 | 181  | 33  | 868284  | 239232  | 0 | 5  | 0 | 0 | 50 | 62 | 18137132 | 3.94E-01 | 1 |
| ADAM17   | 691902  | 278  | 38  | 2186196 | 534000  | 0 | 8  | 1 | 0 | 50 | 73 | 22633768 | 3.95E-01 | 1 |
| DCYAP1R  | 364216  | 631  | 7   | 1245288 | 323604  | 0 | 6  | 2 | 0 | 50 | 75 | 19738776 | 3.95E-01 | 1 |
| UBXN7    | 1165640 | 231  | 37  | 1284092 | 330724  | 0 | 5  | 1 | 0 | 50 | 41 | 16631252 | 3.95E-01 | 1 |
| MUC7     | 264556  | 861  | 26  | 891068  | 328588  | 0 | 4  | 1 | 0 | 50 | 64 | 23077700 | 3.95E-01 | 1 |
| BCO2     | 389593  | 362  | 2   | 1504456 | 400856  | 0 | 6  | 1 | 0 | 24 | 19 | 7621604  | 3.95E-01 | 1 |
| CDKL1    | 655106  | 279  | 33  | 945180  | 243504  | 0 | 2  | 0 | 0 | 50 | 63 | 24808928 | 3.95E-01 | 1 |
| C16orf62 | 340032  | 578  | 15  | 2551096 | 667856  | 0 | 10 | 1 | 0 | 9  | 20 | 6815976  | 3.95E-01 | 1 |
| FGD6     | 370367  | 544  | 32  | 3728388 | 941976  | 0 | 11 | 0 | 0 | 4  | 3  | 2808484  | 3.95E-01 | 1 |
| IBTK     | 124946  | 466  | -1  | 3530096 | 923464  | 0 | 10 | 3 | 0 | 50 | 51 | 19329020 | 3.95E-01 | 1 |
| LMO3     | 149303  | 802  | -15 | 384480  | 96120   | 0 | 1  | 0 | 0 | 50 | 74 | 22237540 | 3.95E-01 | 1 |
| GRM8     | 60921   | 1082 | -8  | 2350312 | 656108  | 0 | 9  | 3 | 0 | 50 | 71 | 23716008 | 3.96E-01 | 1 |
| LIFR     | 159760  | 271  | -2  | 2860816 | 738344  | 0 | 9  | 1 | 0 | 50 | 51 | 20741272 | 3.96E-01 | 1 |
| RORC     | 1014595 | 212  | 33  | 1340340 | 374868  | 0 | 6  | 1 | 0 | 50 | 65 | 17876896 | 3.96E-01 | 1 |
| ATP2C2   | 646239  | 396  | 5   | 2449636 | 697760  | 0 | 7  | 3 | 0 | 50 | 46 | 17529084 | 3.96E-01 | 1 |
| CEP170   | 180288  | 1024 | 0   | 4069080 | 1122468 | 0 | 7  | 1 | 0 | 19 | 10 | 8053432  | 3.96E-01 | 1 |
| ATP6V1C1 | 470948  | 438  | 47  | 1029552 | 248844  | 0 | 5  | 0 | 0 | 50 | 60 | 24426940 | 3.96E-01 | 1 |
| PHKA1    | 385429  | NaN  | 18  | 3185132 | 868996  | 0 | 12 | 1 | 0 | 13 | 9  | 3784280  | 3.96E-01 | 1 |
| ACSBG1   | 421357  | 314  | 52  | 1861168 | 519404  | 0 | 5  | 0 | 0 | 4  | 1  | 1828416  | 3.96E-01 | 1 |
| CRIP2    | 689089  | 298  | 41  | 554648  | 147028  | 0 | 2  | 0 | 0 | 50 | 46 | 21105816 | 3.96E-01 | 1 |
| IMPA2    | 336901  | 181  | 48  | 732648  | 223212  | 0 | 3  | 1 | 0 | 50 | 46 | 17764044 | 3.96E-01 | 1 |
| CDK9     | 1194942 | 179  | 58  | 960488  | 260236  | 0 | 5  | 0 | 0 | 28 | 49 | 17284512 | 3.96E-01 | 1 |
| WIPF1    | 463489  | 400  | 39  | 1215740 | 428980  | 0 | 6  | 2 | 0 | 21 | 38 | 10225388 | 3.97E-01 | 1 |
| MRPL28   | 1549307 | 207  | 37  | 656108  | 188680  | 0 | 1  | 0 | 0 | 36 | 55 | 20238956 | 3.97E-01 | 1 |
| JOSD2    | 762018  | 517  | 35  | 462800  | 159844  | 0 | 2  | 0 | 0 | 50 | 59 | 22902548 | 3.97E-01 | 1 |
| PIK3R3   | 1116382 | 318  | 20  | 1235676 | 287292  | 0 | 6  | 1 | 0 | 50 | 65 | 24285608 | 3.97E-01 | 1 |
| GNLY     | 1099615 | 181  | 41  | 385904  | 108580  | 0 | 2  | 0 | 0 | 50 | 61 | 19294844 | 3.98E-01 | 1 |
| PLEKHG4  | 1201743 | 142  | 56  | 2972956 | 931652  | 0 | 13 | 4 | 0 | 11 | 22 | 6211844  | 3.98E-01 | 1 |
| PRSS48   | 203766  | 298  | 16  | 827700  | 241368  | 0 | 3  | 0 | 0 | 50 | 33 | 15273468 | 3.98E-01 | 1 |

|          |         |     |     |         |         |   |    |   |   |    |    |          |          |   |
|----------|---------|-----|-----|---------|---------|---|----|---|---|----|----|----------|----------|---|
| PADI4    | 457546  | 210 | 34  | 1719124 | 474548  | 0 | 6  | 1 | 0 | 44 | 53 | 19075192 | 3.98E-01 | 1 |
| ZNF335   | 677949  | 209 | 55  | 3405496 | 1012820 | 0 | 10 | 4 | 0 | 50 | 68 | 23270296 | 3.98E-01 | 1 |
| OR2G2    | 204354  | 957 | -25 | 773944  | 243860  | 0 | 7  | 2 | 0 | 21 | 47 | 9325064  | 3.98E-01 | 1 |
| PDXP     | 1136064 | 180 | 65  | 703456  | 254540  | 0 | 1  | 0 | 0 | 40 | 37 | 15616296 | 3.98E-01 | 1 |
| OR51D1   | 212267  | 935 | -3  | 784624  | 260948  | 0 | 3  | 1 | 0 | 50 | 68 | 21342556 | 3.98E-01 | 1 |
| SLC25A4  | 317559  | 530 | 42  | 756856  | 213956  | 0 | 2  | 0 | 0 | 50 | 49 | 15741252 | 3.98E-01 | 1 |
| PIH1D1   | 2173457 | 290 | 44  | 757924  | 210752  | 0 | 4  | 1 | 0 | 50 | 67 | 19850560 | 3.98E-01 | 1 |
| POLDIP3  | 914105  | 189 | 69  | 1067644 | 320756  | 0 | 5  | 1 | 0 | 50 | 48 | 20403072 | 3.98E-01 | 1 |
| FAU      | 3267059 | 207 | 46  | 342828  | 105732  | 0 | 2  | 0 | 0 | 50 | 74 | 20482816 | 3.98E-01 | 1 |
| JAZF1    | 292385  | 474 | 14  | 627984  | 170880  | 0 | 3  | 0 | 0 | 50 | 50 | 18228980 | 3.99E-01 | 1 |
| AKT3     | 208930  | 954 | -4  | 1330016 | 314704  | 0 | 5  | 2 | 0 | 50 | 64 | 20173808 | 3.99E-01 | 1 |
| FGF23    | 295315  | 860 | 33  | 627628  | 188324  | 0 | 3  | 2 | 0 | 15 | 12 | 4899628  | 3.99E-01 | 1 |
| PSTK     | 274189  | 673 | 11  | 903884  | 238876  | 0 | 3  | 1 | 0 | 50 | 64 | 18840944 | 3.99E-01 | 1 |
| KCNE2    | 410767  | 518 | 61  | 320756  | 80812   | 0 | 2  | 0 | 0 | 50 | 51 | 13682860 | 3.99E-01 | 1 |
| PHF21A   | 513122  | 344 | 32  | 1782492 | 499824  | 0 | 4  | 0 | 0 | 9  | 3  | 3284456  | 3.99E-01 | 1 |
| PLXNA4   | 314659  | 746 | 9   | 5088308 | 1448920 | 0 | 20 | 8 | 0 | 50 | 62 | 21495280 | 3.99E-01 | 1 |
| GHR      | 248127  | 909 | -12 | 1655400 | 430404  | 0 | 6  | 0 | 0 | 9  | 5  | 2969040  | 3.99E-01 | 1 |
| PCNP     | 549032  | 445 | 14  | 467784  | 124956  | 0 | 2  | 0 | 0 | 50 | 55 | 21197664 | 3.99E-01 | 1 |
| DDX58    | 426359  | 362 | -12 | 2453196 | 586332  | 0 | 6  | 0 | 0 | 27 | 19 | 11313680 | 3.99E-01 | 1 |
| CAT      | 653478  | 256 | 23  | 1383060 | 362052  | 0 | 8  | 0 | 0 | 29 | 37 | 11153836 | 3.99E-01 | 1 |
| PFKM     | 484445  | 255 | 31  | 2220728 | 615880  | 0 | 7  | 0 | 0 | 9  | 8  | 3839460  | 4.00E-01 | 1 |
| BIRC7    | 1005137 | 285 | 50  | 758636  | 224992  | 0 | 4  | 2 | 0 | 28 | 31 | 9962660  | 4.00E-01 | 1 |
| PRAMEF2  | 118495  | 792 | 12  | 1193312 | 341404  | 0 | 5  | 2 | 0 | 50 | 47 | 18244288 | 4.00E-01 | 1 |
| OPHN1    | 186481  | NaN | -13 | 2133152 | 542188  | 0 | 7  | 2 | 0 | 50 | 43 | 17338624 | 4.00E-01 | 1 |
| C6orf120 | 233648  | 447 | 3   | 467428  | 147740  | 0 | 2  | 0 | 0 | 50 | 61 | 23526260 | 4.00E-01 | 1 |
| EXOSC4   | 2720766 | 211 | 27  | 593096  | 205768  | 0 | 3  | 1 | 0 | 25 | 30 | 10299080 | 4.00E-01 | 1 |
| CYGB     | 1016866 | 197 | 24  | 485228  | 139552  | 0 | 4  | 2 | 0 | 14 | 31 | 6757236  | 4.00E-01 | 1 |
| AKAP12   | 340429  | 383 | 11  | 4468512 | 1285872 | 0 | 12 | 6 | 0 | 50 | 39 | 20902896 | 4.00E-01 | 1 |
| HPGD     | 62916   | 536 | -11 | 708440  | 172660  | 0 | 2  | 1 | 0 | 30 | 44 | 14163460 | 4.01E-01 | 1 |
| P2RX6    | 577297  | 192 | 58  | 1137776 | 327520  | 0 | 3  | 1 | 0 | 50 | 77 | 21004712 | 4.01E-01 | 1 |
| TFAM     | 152882  | 326 | -7  | 655752  | 161268  | 0 | 1  | 1 | 0 | 50 | 60 | 23413764 | 4.01E-01 | 1 |
| C1orf127 | 702484  | 307 | 33  | 2020656 | 670704  | 0 | 4  | 1 | 0 | 46 | 51 | 22404860 | 4.01E-01 | 1 |
| IGSF10   | 36173   | 606 | 6   | 6545060 | 1934860 | 0 | 24 | 8 | 0 | 29 | 44 | 14912128 | 4.01E-01 | 1 |



|         |         |     |     |         |        |   |    |   |   |    |     |          |          |   |
|---------|---------|-----|-----|---------|--------|---|----|---|---|----|-----|----------|----------|---|
| ST3GAL5 | 1164530 | 216 | 51  | 1097548 | 288716 | 0 | 4  | 0 | 0 | 50 | 69  | 22410200 | 4.01E-01 | 1 |
| NR1H4   | 191698  | 787 | -6  | 1245288 | 308652 | 0 | 3  | 0 | 0 | 48 | 29  | 18900752 | 4.01E-01 | 1 |
| ATN1    | 2704950 | 211 | 47  | 2859036 | 991104 | 0 | 13 | 0 | 0 | 0  | 0   | 991104   | 4.01E-01 | 1 |
| BTNL8   | 783856  | 602 | 14  | 1435748 | 368104 | 0 | 6  | 0 | 0 | 21 | 31  | 11171992 | 4.01E-01 | 1 |
| PSMC3IP | 1884163 | 177 | 38  | 596300  | 136348 | 0 | 1  | 0 | 0 | 50 | 68  | 23826724 | 4.01E-01 | 1 |
| ATP5E   | 948552  | 126 | 25  | 142044  | 35244  | 0 | 1  | 0 | 0 | 50 | 80  | 21891152 | 4.01E-01 | 1 |
| RHBDL3  | 671605  | 271 | 22  | 1024924 | 309008 | 0 | 3  | 0 | 0 | 50 | 55  | 19760848 | 4.01E-01 | 1 |
| TSPAN31 | 1160849 | 344 | 39  | 546460  | 150944 | 0 | 3  | 2 | 0 | 2  | 11  | 1409404  | 4.02E-01 | 1 |
| FRZB    | 330424  | 450 | 6   | 830548  | 235316 | 0 | 4  | 0 | 0 | 50 | 52  | 17649412 | 4.02E-01 | 1 |
| JKAMP   | 168237  | 606 | 12  | 805984  | 219296 | 0 | 2  | 0 | 0 | 50 | 50  | 18757640 | 4.02E-01 | 1 |
| PGAP3   | 1284992 | 226 | 38  | 817376  | 243148 | 0 | 2  | 0 | 0 | 50 | 64  | 21003644 | 4.02E-01 | 1 |
| BIRC5   | 683401  | 191 | 24  | 540052  | 118904 | 0 | 2  | 0 | 0 | 50 | 56  | 23959868 | 4.02E-01 | 1 |
| ZNF394  | 1327454 | 288 | 60  | 1425424 | 383768 | 0 | 9  | 0 | 0 | 21 | 29  | 7233564  | 4.02E-01 | 1 |
| ACTN2   | 427180  | 682 | -10 | 2354940 | 598080 | 0 | 8  | 2 | 0 | 50 | 46  | 14893616 | 4.02E-01 | 1 |
| OR52E8  | 203856  | 922 | -5  | 777148  | 239588 | 0 | 3  | 1 | 0 | 50 | 39  | 17006476 | 4.02E-01 | 1 |
| PCDHA11 | NaN     | NaN | NaN | 2347108 | 751160 | 0 | 7  | 3 | 0 | 50 | 119 | 40396744 | 4.02E-01 | 1 |
| CHFR    | 944795  | 674 | 10  | 1806700 | 500180 | 0 | 8  | 3 | 0 | 13 | 21  | 7354248  | 4.02E-01 | 1 |
| TXLNA   | 1460758 | 218 | 29  | 1414744 | 380564 | 0 | 5  | 3 | 0 | 20 | 18  | 7618044  | 4.02E-01 | 1 |
| ZNF813  | 361546  | 876 | -58 | 1600576 | 392312 | 0 | 7  | 1 | 0 | 50 | 64  | 19075904 | 4.02E-01 | 1 |
| CBLN4   | 236365  | 941 | -74 | 495908  | 159844 | 0 | 3  | 1 | 0 | 50 | 80  | 19146748 | 4.02E-01 | 1 |
| GPX6    | 255783  | 592 | 26  | 579568  | 150944 | 0 | 2  | 0 | 0 | 50 | 62  | 25311600 | 4.02E-01 | 1 |
| RRH     | 212757  | 462 | 28  | 876472  | 234248 | 0 | 4  | 1 | 0 | 50 | 47  | 18097260 | 4.02E-01 | 1 |
| NCSTN   | 987855  | 526 | 28  | 1824500 | 520828 | 0 | 9  | 2 | 0 | 50 | 69  | 19516276 | 4.02E-01 | 1 |
| TC2N    | 368236  | 478 | 21  | 1283380 | 336776 | 0 | 4  | 0 | 0 | 9  | 14  | 4745836  | 4.02E-01 | 1 |
| FKBP3   | 234268  | 565 | 11  | 600216  | 148452 | 0 | 2  | 0 | 0 | 50 | 42  | 21031768 | 4.02E-01 | 1 |
| FNDC3A  | 321392  | 424 | 47  | 3118916 | 841228 | 0 | 12 | 0 | 0 | 16 | 9   | 5781440  | 4.02E-01 | 1 |
| NRCAM   | 441225  | 682 | 1   | 3434332 | 904952 | 0 | 13 | 1 | 0 | 12 | 8   | 4053772  | 4.03E-01 | 1 |
| STAT3   | 2140948 | 160 | 32  | 2055900 | 515844 | 0 | 10 | 1 | 0 | 50 | 67  | 20340772 | 4.03E-01 | 1 |
| MLXIPL  | 1197825 | 214 | 52  | 2122472 | 681028 | 0 | 6  | 2 | 0 | 7  | 5   | 2787836  | 4.03E-01 | 1 |
| RNF185  | 699351  | 218 | 41  | 506588  | 137416 | 0 | 2  | 0 | 0 | 50 | 57  | 23250004 | 4.03E-01 | 1 |
| EHBP1   | 160013  | 618 | 8   | 3230344 | 815240 | 0 | 17 | 1 | 0 | 9  | 8   | 3916000  | 4.03E-01 | 1 |
| MFSD6   | 651647  | 371 | 30  | 1983988 | 579212 | 0 | 8  | 2 | 0 | 9  | 12  | 4311516  | 4.03E-01 | 1 |
| DNMT3L  | 1128093 | 219 | 76  | 1015312 | 276968 | 0 | 2  | 0 | 0 | 50 | 45  | 20503464 | 4.03E-01 | 1 |

|          |         |     |     |         |         |   |    |   |   |    |     |          |          |   |
|----------|---------|-----|-----|---------|---------|---|----|---|---|----|-----|----------|----------|---|
| PAX3     | 191783  | 682 | 11  | 1406200 | 384836  | 0 | 7  | 3 | 0 | 32 | 51  | 13683216 | 4.03E-01 | 1 |
| MDP1     | 974559  | 220 | 41  | 471344  | 123532  | 0 | 2  | 0 | 0 | 50 | 62  | 24565780 | 4.03E-01 | 1 |
| OTP      | 276866  | 584 | 42  | 787472  | 265576  | 0 | 2  | 1 | 0 | 50 | 60  | 19334360 | 4.03E-01 | 1 |
| SMARCB1  | 637355  | 196 | 52  | 1003920 | 267000  | 0 | 3  | 0 | 0 | 24 | 21  | 8565716  | 4.03E-01 | 1 |
| L3MBTL3  | 68020   | 844 | 23  | 2083668 | 508368  | 0 | 6  | 0 | 0 | 50 | 40  | 19288436 | 4.03E-01 | 1 |
| MYPN     | 407663  | 251 | 19  | 3346756 | 965828  | 0 | 13 | 4 | 0 | 23 | 30  | 9823464  | 4.03E-01 | 1 |
| ADAT2    | 299410  | 495 | 7   | 506588  | 132076  | 0 | 2  | 0 | 0 | 50 | 58  | 20836324 | 4.03E-01 | 1 |
| DLL1     | 374629  | 631 | -23 | 1843368 | 519048  | 0 | 8  | 2 | 0 | 36 | 50  | 14372788 | 4.03E-01 | 1 |
| PHF20L1  | 195342  | 773 | -4  | 2763272 | 686368  | 0 | 11 | 0 | 0 | 5  | 4   | 1938420  | 4.03E-01 | 1 |
| S100G    | 294904  | NaN | 28  | 213956  | 50908   | 0 | 1  | 0 | 0 | 50 | 73  | 25991204 | 4.03E-01 | 1 |
| ASNA1    | 1959466 | 226 | 29  | 902816  | 243148  | 0 | 3  | 1 | 0 | 50 | 74  | 23429072 | 4.03E-01 | 1 |
| PPIL4    | 434611  | 150 | 40  | 1330728 | 302244  | 0 | 6  | 0 | 0 | 50 | 48  | 18535140 | 4.04E-01 | 1 |
| RNASEL   | 597206  | 812 | -3  | 1882528 | 516200  | 0 | 9  | 1 | 0 | 50 | 60  | 22449360 | 4.04E-01 | 1 |
| CLCF1    | 1269888 | 177 | 51  | 555716  | 176932  | 0 | 2  | 0 | 0 | 50 | 45  | 20698908 | 4.04E-01 | 1 |
| DCTN2    | 1347795 | 303 | 44  | 1048420 | 296192  | 0 | 5  | 0 | 0 | 40 | 78  | 26763012 | 4.04E-01 | 1 |
| ZBTB11   | 548328  | 445 | 16  | 2695276 | 724460  | 0 | 9  | 2 | 0 | 37 | 47  | 14390944 | 4.04E-01 | 1 |
| RUFY2    | 740263  | 294 | 23  | 1818804 | 435744  | 0 | 4  | 2 | 0 | 50 | 69  | 24135020 | 4.04E-01 | 1 |
| HIST1H1B | 228884  | 634 | 40  | 552156  | 179424  | 0 | 4  | 4 | 0 | 12 | 15  | 2172668  | 4.04E-01 | 1 |
| GIGYF1   | 1884430 | 247 | 60  | 2643300 | 774300  | 0 | 10 | 3 | 0 | 22 | 30  | 9880780  | 4.04E-01 | 1 |
| F5       | 294416  | 415 | 11  | 5721276 | 1510152 | 0 | 20 | 5 | 0 | 50 | 45  | 22176308 | 4.04E-01 | 1 |
| PCDH11Y  | 0       | 0   | 0   | 3375948 | 999648  | 0 | 9  | 1 | 0 | 39 | 23  | 17595656 | 4.04E-01 | 1 |
| SERPINI2 | 135686  | 933 | -18 | 1074052 | 260948  | 0 | 5  | 1 | 0 | 50 | 78  | 21467156 | 4.04E-01 | 1 |
| OR13H1   | 81234   | NaN | 4   | 756144  | 232824  | 0 | 4  | 1 | 0 | 48 | 76  | 26426236 | 4.05E-01 | 1 |
| FBXL5    | 190822  | 327 | 37  | 1803496 | 457460  | 0 | 5  | 1 | 0 | 50 | 55  | 18011464 | 4.05E-01 | 1 |
| STAT4    | 529053  | 318 | 19  | 2002144 | 494840  | 0 | 9  | 0 | 0 | 19 | 23  | 9872236  | 4.05E-01 | 1 |
| ARHGAP20 | 156598  | 456 | 38  | 2159140 | 548240  | 0 | 8  | 2 | 0 | 50 | 77  | 23703192 | 4.05E-01 | 1 |
| PVRL3    | 79394   | 878 | -15 | 1383416 | 400144  | 0 | 4  | 2 | 0 | 19 | 27  | 8785012  | 4.05E-01 | 1 |
| ZNF14    | 635741  | 545 | -30 | 1674268 | 398720  | 0 | 9  | 2 | 0 | 50 | 54  | 18667928 | 4.05E-01 | 1 |
| PLSCR1   | 123426  | 671 | -12 | 843008  | 213244  | 0 | 3  | 0 | 0 | 50 | 58  | 26015412 | 4.05E-01 | 1 |
| PDHX     | 663753  | 258 | 6   | 1372736 | 419368  | 0 | 4  | 0 | 0 | 15 | 14  | 6734452  | 4.05E-01 | 1 |
| IAPP     | NaN     | NaN | NaN | 228552  | 68352   | 0 | 1  | 0 | 0 | 50 | 116 | 39713936 | 4.05E-01 | 1 |
| WDR66    | 814234  | 162 | 38  | 3030628 | 804560  | 0 | 11 | 3 | 0 | 50 | 37  | 15422632 | 4.05E-01 | 1 |
| CSNK1A1  | 607110  | 152 | 32  | 978644  | 236740  | 0 | 4  | 0 | 0 | 50 | 53  | 20083028 | 4.05E-01 | 1 |

|         |         |      |     |         |         |   |    |   |   |    |     |          |          |   |
|---------|---------|------|-----|---------|---------|---|----|---|---|----|-----|----------|----------|---|
| RGS19   | 1032302 | 312  | 51  | 564616  | 155216  | 0 | 3  | 0 | 0 | 50 | 69  | 20843800 | 4.06E-01 | 1 |
| ZFP28   | 135553  | 817  | -69 | 2230696 | 585620  | 0 | 5  | 0 | 0 | 9  | 9   | 6477776  | 4.06E-01 | 1 |
| ST7L    | 561127  | 355  | 19  | 1535428 | 409400  | 0 | 4  | 1 | 0 | 37 | 37  | 14993652 | 4.06E-01 | 1 |
| PAK6    | 829569  | 167  | 31  | 1683168 | 536136  | 0 | 4  | 1 | 0 | 13 | 18  | 5586708  | 4.06E-01 | 1 |
| MAB21L2 | 214274  | 848  | 18  | 885016  | 268424  | 0 | 4  | 1 | 0 | 50 | 46  | 18957356 | 4.06E-01 | 1 |
| EFHD2   | 554165  | 212  | 29  | 617660  | 169456  | 0 | 2  | 1 | 0 | 29 | 58  | 14632312 | 4.06E-01 | 1 |
| PDHA2   | 16119   | 968  | -25 | 966184  | 282308  | 0 | 6  | 1 | 0 | 50 | 82  | 23328680 | 4.06E-01 | 1 |
| PIP5K1A | 1409327 | 184  | 32  | 1462448 | 405484  | 0 | 5  | 0 | 0 | 34 | 43  | 14948796 | 4.06E-01 | 1 |
| UBR1    | 634287  | 366  | 32  | 4662888 | 1142760 | 0 | 10 | 3 | 0 | 29 | 29  | 15916048 | 4.06E-01 | 1 |
| CLEC7A  | 396940  | 445  | -1  | 696692  | 157708  | 0 | 3  | 1 | 0 | 50 | 48  | 19709940 | 4.06E-01 | 1 |
| FGF5    | 61128   | 903  | -3  | 679248  | 191172  | 0 | 4  | 1 | 0 | 50 | 55  | 19632332 | 4.06E-01 | 1 |
| TACC1   | 623231  | 286  | 35  | 2064444 | 569244  | 0 | 4  | 2 | 0 | 9  | 3   | 3650424  | 4.06E-01 | 1 |
| SEC23B  | 414545  | 392  | 23  | 1988972 | 552868  | 0 | 5  | 1 | 0 | 50 | 46  | 21908240 | 4.07E-01 | 1 |
| SET     | 1865107 | 197  | 38  | 852264  | 190104  | 0 | 3  | 0 | 0 | 50 | 70  | 23922844 | 4.07E-01 | 1 |
| MYL12B  | 551966  | 328  | 55  | 460664  | 106444  | 0 | 2  | 0 | 0 | 50 | 53  | 19696056 | 4.07E-01 | 1 |
| CANX    | 1624288 | 256  | 44  | 1577080 | 382700  | 0 | 4  | 2 | 0 | 50 | 82  | 25179524 | 4.07E-01 | 1 |
| SPTLC1  | 485523  | 340  | 32  | 1252408 | 335708  | 0 | 4  | 0 | 0 | 50 | 43  | 17352864 | 4.07E-01 | 1 |
| PKDCC   | 210167  | 164  | -5  | 1202924 | 405484  | 0 | 4  | 1 | 0 | 50 | 43  | 20630200 | 4.07E-01 | 1 |
| ISG20   | 393645  | 605  | 14  | 453544  | 142400  | 0 | 2  | 1 | 0 | 34 | 45  | 15673256 | 4.07E-01 | 1 |
| DPPA4   | 22565   | 1096 | -19 | 786048  | 218940  | 0 | 3  | 1 | 0 | 50 | 68  | 19038524 | 4.07E-01 | 1 |
| OR9G1   | NaN     | NaN  | NaN | 750092  | 228196  | 0 | 4  | 1 | 0 | 50 | 117 | 39873780 | 4.07E-01 | 1 |
| TMC5    | 522510  | 369  | 13  | 2873988 | 771096  | 0 | 11 | 1 | 0 | 15 | 24  | 8746920  | 4.07E-01 | 1 |
| SFPQ    | 822666  | 380  | 36  | 1774660 | 534356  | 0 | 3  | 1 | 0 | 27 | 21  | 9984020  | 4.07E-01 | 1 |
| HTR3C   | 1423268 | 375  | 38  | 1148456 | 323248  | 0 | 5  | 0 | 0 | 5  | 2   | 2092924  | 4.07E-01 | 1 |
| TOR3A   | 345937  | 301  | 4   | 1011040 | 285512  | 0 | 4  | 1 | 0 | 50 | 52  | 22070220 | 4.08E-01 | 1 |
| ZG16B   | 1717244 | 210  | 42  | 525456  | 159132  | 0 | 1  | 0 | 0 | 50 | 80  | 24105472 | 4.08E-01 | 1 |
| GNE     | 857846  | 257  | 46  | 1923824 | 541120  | 0 | 8  | 1 | 0 | 50 | 67  | 23320136 | 4.08E-01 | 1 |
| AZU1    | 2168802 | 198  | 28  | 621220  | 205412  | 0 | 2  | 2 | 0 | 29 | 50  | 13937044 | 4.08E-01 | 1 |
| AUTS2   | 52369   | 997  | 12  | 3276624 | 990036  | 0 | 15 | 3 | 0 | 50 | 68  | 22448292 | 4.08E-01 | 1 |
| OR12D2  | 329776  | 872  | 7   | 761128  | 229976  | 0 | 3  | 0 | 0 | 50 | 77  | 21945976 | 4.08E-01 | 1 |
| KCNJ4   | 1466610 | 215  | 23  | 1100040 | 333216  | 0 | 4  | 3 | 0 | 28 | 19  | 7961584  | 4.08E-01 | 1 |
| BARHL2  | 82474   | 897  | -4  | 961200  | 292632  | 0 | 3  | 2 | 0 | 50 | 62  | 21504536 | 4.08E-01 | 1 |
| TMEM215 | 610744  | 401  | -18 | 587400  | 173016  | 0 | 5  | 2 | 0 | 4  | 5   | 1442156  | 4.09E-01 | 1 |

|           |         |      |     |         |        |   |    |   |   |    |    |          |          |   |
|-----------|---------|------|-----|---------|--------|---|----|---|---|----|----|----------|----------|---|
| LRRC61    | 315538  | 514  | 32  | 614100  | 218940 | 0 | 1  | 0 | 0 | 50 | 70 | 24657628 | 4.09E-01 | 1 |
| SHFM1     | 170353  | 1045 | 10  | 198648  | 37380  | 0 | 1  | 0 | 0 | 40 | 46 | 17514488 | 4.09E-01 | 1 |
| SPTLC2    | 500852  | 320  | 40  | 1445360 | 405484 | 0 | 5  | 1 | 0 | 50 | 46 | 16767956 | 4.09E-01 | 1 |
| KHDRBS3   | 16039   | 1124 | -24 | 897120  | 248844 | 0 | 5  | 0 | 0 | 14 | 26 | 6203656  | 4.09E-01 | 1 |
| ZNF382    | 635596  | 889  | -38 | 1430408 | 347812 | 0 | 7  | 1 | 0 | 35 | 44 | 12365304 | 4.09E-01 | 1 |
| ZNF662    | 301212  | 447  | 21  | 1254900 | 325740 | 0 | 6  | 0 | 0 | 50 | 67 | 24596752 | 4.09E-01 | 1 |
| RUNX2     | 54989   | 416  | 8   | 1328948 | 392668 | 0 | 3  | 0 | 0 | 50 | 48 | 20863380 | 4.09E-01 | 1 |
| RAB11FIP2 | 100461  | 912  | -1  | 1323252 | 337488 | 0 | 5  | 1 | 0 | 50 | 54 | 19390252 | 4.09E-01 | 1 |
| FGF9      | 298481  | 648  | 37  | 528660  | 149520 | 0 | 3  | 0 | 0 | 50 | 54 | 17576788 | 4.09E-01 | 1 |
| IZUMO1    | 1635420 | 190  | 44  | 920972  | 244216 | 0 | 3  | 1 | 0 | 50 | 73 | 21072352 | 4.09E-01 | 1 |
| CCL26     | 1012112 | 255  | 51  | 251336  | 65860  | 0 | 1  | 0 | 0 | 50 | 45 | 16982624 | 4.10E-01 | 1 |
| DIAPH3    | 80757   | 890  | 22  | 3178368 | 783912 | 0 | 7  | 2 | 0 | 50 | 51 | 24160652 | 4.10E-01 | 1 |
| SNPH      | 441449  | 468  | 32  | 1224284 | 378784 | 0 | 2  | 0 | 0 | 42 | 27 | 15577492 | 4.10E-01 | 1 |
| TMEM65    | 330177  | 445  | 14  | 607336  | 190460 | 0 | 3  | 1 | 0 | 50 | 47 | 17346456 | 4.10E-01 | 1 |
| MYT1L     | 54881   | 901  | -24 | 3115356 | 764688 | 0 | 19 | 6 | 0 | 24 | 34 | 8747632  | 4.10E-01 | 1 |
| AATF      | 668463  | 384  | 16  | 1470992 | 373444 | 0 | 3  | 1 | 0 | 50 | 42 | 20432264 | 4.10E-01 | 1 |
| DNAJC9    | 829738  | 249  | 44  | 678180  | 177288 | 0 | 2  | 1 | 0 | 25 | 35 | 10890040 | 4.10E-01 | 1 |
| SLC26A9   | 690729  | 431  | 33  | 2281604 | 655396 | 0 | 8  | 3 | 0 | 50 | 63 | 24215832 | 4.10E-01 | 1 |
| SH3BP5    | 516326  | 303  | 32  | 1178716 | 320756 | 0 | 3  | 2 | 0 | 50 | 50 | 19664372 | 4.10E-01 | 1 |
| HOXA11    | 473864  | 394  | 13  | 775368  | 237096 | 0 | 4  | 0 | 0 | 44 | 70 | 23677204 | 4.10E-01 | 1 |
| WFDC8     | 902945  | 438  | 27  | 655396  | 147740 | 0 | 2  | 1 | 0 | 50 | 69 | 22419456 | 4.10E-01 | 1 |
| MARK4     | 1318362 | 215  | 31  | 1748672 | 533644 | 0 | 5  | 4 | 0 | 43 | 64 | 16024628 | 4.10E-01 | 1 |
| MS4A4A    | 469977  | 882  | 8   | 621932  | 174796 | 0 | 2  | 1 | 0 | 50 | 69 | 21814256 | 4.11E-01 | 1 |
| CYP2C19   | 254705  | 831  | -17 | 1267716 | 338556 | 0 | 5  | 0 | 0 | 50 | 62 | 20004352 | 4.11E-01 | 1 |
| KBTBD7    | 314264  | 337  | 66  | 1702036 | 492704 | 0 | 7  | 2 | 0 | 50 | 73 | 22716004 | 4.11E-01 | 1 |
| SPDYA     | 481869  | 238  | 32  | 843364  | 200072 | 0 | 4  | 0 | 0 | 50 | 50 | 18398080 | 4.11E-01 | 1 |
| FLII      | 187976  | 647  | 20  | 1180496 | 305092 | 0 | 4  | 2 | 0 | 12 | 10 | 4463172  | 4.11E-01 | 1 |
| BARD1     | 310874  | 948  | 11  | 2001788 | 533644 | 0 | 8  | 0 | 0 | 18 | 17 | 8493448  | 4.11E-01 | 1 |
| CCBL2     | 316278  | 598  | 5   | 1204348 | 307940 | 0 | 4  | 0 | 0 | 50 | 59 | 20056684 | 4.11E-01 | 1 |
| PUS3      | 611330  | 414  | 14  | 1231048 | 326096 | 0 | 3  | 1 | 0 | 50 | 49 | 20321548 | 4.11E-01 | 1 |
| TSSC1     | 255965  | 619  | -1  | 1013888 | 263440 | 0 | 3  | 0 | 0 | 50 | 58 | 19622364 | 4.11E-01 | 1 |
| GSS       | 968413  | 236  | 40  | 1211468 | 361696 | 0 | 4  | 3 | 0 | 32 | 43 | 15816012 | 4.12E-01 | 1 |
| ENOSF1    | 418492  | 425  | 32  | 1318624 | 323960 | 0 | 3  | 0 | 0 | 6  | 2  | 2910300  | 4.12E-01 | 1 |

|            |         |      |     |         |         |   |    |    |   |    |     |          |          |   |
|------------|---------|------|-----|---------|---------|---|----|----|---|----|-----|----------|----------|---|
| SLC15A1    | 334185  | 409  | 41  | 1878968 | 488788  | 0 | 4  | 1  | 0 | 50 | 72  | 26506692 | 4.12E-01 | 1 |
| ZNF415     | 392290  | 946  | -49 | 1460312 | 356356  | 0 | 5  | 1  | 0 | 50 | 50  | 16685008 | 4.12E-01 | 1 |
| CCDC63     | 888826  | 474  | 46  | 1487368 | 368816  | 0 | 6  | 0  | 0 | 50 | 54  | 22978020 | 4.12E-01 | 1 |
| RLN1       | 398278  | 629  | 13  | 471344  | 128872  | 0 | 2  | 1  | 0 | 30 | 31  | 11991860 | 4.12E-01 | 1 |
| OCEL1      | 865138  | 212  | 38  | 669280  | 203276  | 0 | 2  | 0  | 0 | 50 | 59  | 18864796 | 4.12E-01 | 1 |
| PPL        | 702265  | 206  | 19  | 4470292 | 1250984 | 0 | 19 | 3  | 0 | 50 | 67  | 23167056 | 4.12E-01 | 1 |
| TOM1L2     | 1093302 | 173  | 22  | 1311860 | 375580  | 0 | 9  | 1  | 0 | 4  | 6   | 1993244  | 4.12E-01 | 1 |
| HOXA13     | 473864  | 394  | 13  | 943400  | 309364  | 0 | 4  | 1  | 0 | 50 | 80  | 25624168 | 4.13E-01 | 1 |
| TNNT1      | 1036976 | 266  | -1  | 767180  | 182272  | 0 | 4  | 1  | 0 | 50 | 46  | 14741248 | 4.13E-01 | 1 |
| ARHGGEF10  | 248448  | 483  | 21  | 1807768 | 526880  | 0 | 8  | 3  | 0 | 15 | 16  | 6357092  | 4.13E-01 | 1 |
| OAS2       | 605960  | 433  | 54  | 1924180 | 512996  | 0 | 10 | 3  | 0 | 22 | 57  | 10513748 | 4.13E-01 | 1 |
| MRPL53     | 1069803 | 343  | 45  | 281596  | 89000   | 0 | 2  | 1  | 0 | 11 | 18  | 4496636  | 4.13E-01 | 1 |
| C19orf44   | 815495  | 258  | 44  | 1653976 | 487364  | 0 | 5  | 0  | 0 | 19 | 22  | 9318300  | 4.13E-01 | 1 |
| BTBD7      | 321756  | 407  | 31  | 2906384 | 840160  | 0 | 8  | 0  | 0 | 24 | 19  | 11059496 | 4.13E-01 | 1 |
| ACCS       | 345807  | 680  | 3   | 1305808 | 360272  | 0 | 3  | 3  | 0 | 19 | 21  | 7155600  | 4.13E-01 | 1 |
| ZNF608     | 39167   | 575  | 14  | 3797096 | 1084732 | 0 | 13 | 4  | 0 | 50 | 60  | 23181652 | 4.13E-01 | 1 |
| KIN        | 199265  | 447  | 4   | 1060524 | 255252  | 0 | 4  | 0  | 0 | 16 | 9   | 5151320  | 4.13E-01 | 1 |
| SLCO1B3    | 151869  | 521  | -24 | 1831264 | 480956  | 0 | 12 | 1  | 0 | 9  | 15  | 3941988  | 4.13E-01 | 1 |
| HIST1H2B.2 | 272695  | 635  | 29  | 317908  | 94340   | 0 | 2  | 1  | 0 | 24 | 35  | 8484904  | 4.13E-01 | 1 |
| RRAGB      | 59904   | NaN  | 23  | 996444  | 247776  | 0 | 3  | 1  | 0 | 50 | 55  | 19193384 | 4.13E-01 | 1 |
| ZCCHC5     | 263052  | NaN  | 20  | 1187260 | 337844  | 0 | 5  | 0  | 0 | 9  | 7   | 3634760  | 4.14E-01 | 1 |
| STEAP2     | 132955  | 1140 | 6   | 1274124 | 352440  | 0 | 5  | 2  | 0 | 50 | 57  | 19537280 | 4.14E-01 | 1 |
| DCLK3      | 374894  | 617  | -14 | 1644008 | 448204  | 0 | 4  | 1  | 0 | 50 | 31  | 15467488 | 4.14E-01 | 1 |
| RPL10      | 2277674 | NaN  | 40  | 563548  | 150944  | 0 | 2  | 0  | 0 | 50 | 46  | 20570392 | 4.14E-01 | 1 |
| DIDO1      | 961230  | 336  | 40  | 5634056 | 1740484 | 0 | 36 | 12 | 0 | 48 | 80  | 21420520 | 4.14E-01 | 1 |
| ZNF770     | 432995  | 382  | 2   | 1778220 | 443220  | 0 | 5  | 0  | 0 | 50 | 42  | 17923532 | 4.14E-01 | 1 |
| SLC17A1    | 293308  | 635  | 30  | 1207908 | 342828  | 0 | 3  | 1  | 0 | 17 | 18  | 6532244  | 4.14E-01 | 1 |
| SCAMP4     | 1944774 | 239  | 36  | 599860  | 162692  | 0 | 3  | 0  | 0 | 50 | 67  | 22320132 | 4.14E-01 | 1 |
| PCDHGB3    | 662513  | 568  | 2   | 2304744 | 715560  | 0 | 10 | 3  | 0 | 50 | 85  | 24954176 | 4.14E-01 | 1 |
| ZNF543     | 432083  | 869  | -17 | 1541836 | 396584  | 0 | 8  | 1  | 0 | 50 | 60  | 18121112 | 4.15E-01 | 1 |
| IDI2       | 338115  | 407  | 30  | 591316  | 156284  | 0 | 2  | 0  | 0 | 50 | 47  | 22055980 | 4.15E-01 | 1 |
| PRICKLE2   | 163412  | 502  | 3   | 2155580 | 581704  | 0 | 8  | 3  | 0 | 45 | 41  | 14191584 | 4.15E-01 | 1 |
| TCP10L2    | NaN     | NaN  | NaN | 902460  | 260592  | 0 | 2  | 1  | 0 | 50 | 117 | 39906176 | 4.15E-01 | 1 |

|         |         |      |     |         |        |   |    |   |   |    |     |          |          |   |
|---------|---------|------|-----|---------|--------|---|----|---|---|----|-----|----------|----------|---|
| NOB1    | 1410481 | NaN  | 39  | 1058744 | 300820 | 0 | 3  | 2 | 0 | 32 | 65  | 21411264 | 4.15E-01 | 1 |
| LUZP1   | 859705  | 169  | 25  | 2680324 | 774656 | 0 | 8  | 1 | 0 | 4  | 1   | 1791392  | 4.15E-01 | 1 |
| PIGA    | 201763  | NaN  | 43  | 1220724 | 354576 | 0 | 3  | 1 | 0 | 50 | 65  | 24059548 | 4.15E-01 | 1 |
| CALCB   | 277848  | 692  | -18 | 328588  | 98612  | 0 | 2  | 0 | 0 | 50 | 78  | 20277404 | 4.16E-01 | 1 |
| LDLR    | 1808766 | 233  | 33  | 2254548 | 576720 | 0 | 7  | 1 | 0 | 25 | 31  | 10760100 | 4.16E-01 | 1 |
| CYP3A7  | 1430454 | 438  | 42  | 1316488 | 350660 | 0 | 6  | 1 | 0 | 3  | 9   | 3276268  | 4.16E-01 | 1 |
| TCP11L2 | 204762  | 396  | 18  | 1345324 | 359204 | 0 | 7  | 1 | 0 | 50 | 46  | 15722384 | 4.16E-01 | 1 |
| IER2    | 1948449 | 221  | 41  | 535068  | 182628 | 0 | 3  | 1 | 0 | 50 | 60  | 21446864 | 4.16E-01 | 1 |
| C7orf34 | 294033  | 676  | 2   | 375224  | 105376 | 0 | 2  | 1 | 0 | 50 | 59  | 17403416 | 4.16E-01 | 1 |
| B3GALT2 | NaN     | NaN  | NaN | 1065864 | 289428 | 0 | 3  | 1 | 0 | 50 | 117 | 39935012 | 4.16E-01 | 1 |
| DDHD1   | 306643  | 448  | 20  | 2320408 | 644360 | 0 | 9  | 0 | 0 | 6  | 7   | 3966552  | 4.16E-01 | 1 |
| IKBKAP  | 336944  | 471  | 9   | 3515144 | 909580 | 0 | 11 | 1 | 0 | 13 | 12  | 6541500  | 4.16E-01 | 1 |
| SH3BP1  | 1136064 | 180  | 65  | 1772880 | 548952 | 0 | 3  | 2 | 0 | 40 | 37  | 15616296 | 4.16E-01 | 1 |
| CRCT1   | 325831  | 700  | 20  | 246352  | 78320  | 0 | 1  | 0 | 0 | 50 | 63  | 27856288 | 4.16E-01 | 1 |
| ECHDC1  | 120722  | 889  | -4  | 813816  | 196512 | 0 | 2  | 0 | 0 | 50 | 65  | 21953808 | 4.16E-01 | 1 |
| ARID4B  | 550877  | 297  | 22  | 3461744 | 843364 | 0 | 10 | 1 | 0 | 3  | 2   | 2066936  | 4.17E-01 | 1 |
| CACNB4  | 279730  | 592  | 21  | 1407624 | 383412 | 0 | 2  | 1 | 0 | 35 | 25  | 16795012 | 4.17E-01 | 1 |
| UTP6    | 705344  | 300  | 21  | 1614816 | 380208 | 0 | 6  | 2 | 0 | 50 | 67  | 23717076 | 4.17E-01 | 1 |
| AKAP3   | 277828  | 874  | 18  | 2141340 | 605556 | 0 | 7  | 1 | 0 | 43 | 40  | 17734496 | 4.17E-01 | 1 |
| STYXL1  | 1072825 | 218  | 49  | 828768  | 210396 | 0 | 2  | 1 | 0 | 50 | 64  | 21496704 | 4.17E-01 | 1 |
| ZCCHC16 | 65327   | NaN  | 3   | 776080  | 220364 | 0 | 3  | 0 | 0 | 50 | 66  | 30273528 | 4.17E-01 | 1 |
| PSMD9   | 831519  | 195  | 45  | 582772  | 156284 | 0 | 3  | 0 | 0 | 50 | 66  | 19935288 | 4.17E-01 | 1 |
| VPS29   | 922262  | 206  | 43  | 489144  | 129228 | 0 | 2  | 0 | 0 | 36 | 42  | 16644780 | 4.17E-01 | 1 |
| GPR174  | 14321   | NaN  | 62  | 836244  | 236028 | 0 | 4  | 0 | 0 | 50 | 74  | 24189132 | 4.18E-01 | 1 |
| IL17REL | 895187  | 271  | 36  | 872556  | 258456 | 0 | 4  | 0 | 0 | 50 | 75  | 27202316 | 4.18E-01 | 1 |
| LMOD1   | 743998  | 168  | 27  | 1511220 | 422928 | 0 | 4  | 0 | 0 | 26 | 27  | 12270252 | 4.18E-01 | 1 |
| CYP2A7  | 1187304 | 275  | 31  | 1281956 | 348880 | 0 | 9  | 4 | 0 | 12 | 14  | 3907100  | 4.18E-01 | 1 |
| ZNF107  | 200262  | 1062 | -11 | 2034184 | 486296 | 0 | 9  | 2 | 0 | 14 | 22  | 8076572  | 4.18E-01 | 1 |
| COPS5   | 393936  | 518  | 12  | 882524  | 220720 | 0 | 2  | 0 | 0 | 50 | 60  | 21748396 | 4.18E-01 | 1 |
| PLEKHA4 | 1766061 | 211  | 34  | 1957644 | 622644 | 0 | 10 | 3 | 0 | 13 | 17  | 6498068  | 4.18E-01 | 1 |
| KLF11   | 922437  | 234  | 42  | 1265580 | 393024 | 0 | 4  | 1 | 0 | 50 | 68  | 25318008 | 4.18E-01 | 1 |
| SPSB4   | 245950  | 574  | 22  | 656820  | 225348 | 0 | 2  | 0 | 0 | 50 | 40  | 20918916 | 4.18E-01 | 1 |
| PEX3    | 318754  | 401  | 13  | 991104  | 254184 | 0 | 3  | 0 | 0 | 37 | 49  | 16650476 | 4.18E-01 | 1 |

|          |         |      |     |         |         |   |    |   |   |    |    |          |          |   |
|----------|---------|------|-----|---------|---------|---|----|---|---|----|----|----------|----------|---|
| NID2     | 234008  | 432  | 20  | 3485952 | 1012464 | 0 | 12 | 1 | 0 | 10 | 8  | 4026716  | 4.18E-01 | 1 |
| GNB3     | 2822601 | 232  | 32  | 887152  | 243860  | 0 | 5  | 1 | 0 | 50 | 62 | 20662240 | 4.18E-01 | 1 |
| KCNK6    | 1467279 | 253  | 0   | 741904  | 272696  | 0 | 2  | 0 | 0 | 18 | 15 | 5595252  | 4.18E-01 | 1 |
| HHIP     | 143634  | 1116 | -6  | 1812752 | 484516  | 0 | 7  | 3 | 0 | 50 | 47 | 19781852 | 4.18E-01 | 1 |
| SUGT1    | 307262  | 469  | 26  | 993596  | 234604  | 0 | 3  | 0 | 0 | 50 | 55 | 21223296 | 4.18E-01 | 1 |
| GRTP1    | 812721  | 237  | 53  | 864368  | 247420  | 0 | 5  | 0 | 0 | 50 | 61 | 19550452 | 4.19E-01 | 1 |
| BLVRB    | 1010633 | 202  | 34  | 514776  | 165540  | 0 | 1  | 1 | 0 | 50 | 62 | 18103668 | 4.19E-01 | 1 |
| GRPEL2   | 422727  | 380  | 28  | 568888  | 168032  | 0 | 2  | 0 | 0 | 50 | 43 | 19341480 | 4.19E-01 | 1 |
| KIAA0586 | 290827  | 454  | 33  | 3821304 | 1022076 | 0 | 8  | 2 | 0 | 50 | 50 | 22364632 | 4.19E-01 | 1 |
| NEU3     | 762277  | 454  | 36  | 1145252 | 343540  | 0 | 5  | 1 | 0 | 50 | 57 | 20954516 | 4.19E-01 | 1 |
| CABP4    | 1392213 | 215  | 53  | 693844  | 213956  | 0 | 3  | 0 | 0 | 11 | 7  | 3262740  | 4.19E-01 | 1 |
| MECR     | 390697  | 395  | 22  | 953724  | 285156  | 0 | 3  | 1 | 0 | 50 | 43 | 22573604 | 4.19E-01 | 1 |
| LYN      | 329738  | 405  | 50  | 1361344 | 333572  | 0 | 5  | 0 | 0 | 50 | 66 | 21903256 | 4.19E-01 | 1 |
| TTC31    | 1019591 | 315  | 50  | 1323608 | 398008  | 0 | 5  | 1 | 0 | 50 | 69 | 21835972 | 4.19E-01 | 1 |
| CCDC126  | 389945  | 361  | 23  | 356712  | 99324   | 0 | 1  | 0 | 0 | 50 | 38 | 20744120 | 4.19E-01 | 1 |
| HKR1     | 228816  | 939  | -63 | 1677116 | 454612  | 0 | 5  | 1 | 0 | 30 | 29 | 10459280 | 4.19E-01 | 1 |
| MS4A5    | 383569  | 899  | 18  | 523676  | 141688  | 0 | 2  | 0 | 0 | 50 | 45 | 18398080 | 4.20E-01 | 1 |
| FCGR2A   | 741254  | 448  | 41  | 826276  | 220364  | 0 | 3  | 1 | 0 | 50 | 66 | 22531596 | 4.20E-01 | 1 |
| LIMCH1   | 319991  | 391  | 31  | 2864376 | 749736  | 0 | 8  | 2 | 0 | 50 | 41 | 21299480 | 4.20E-01 | 1 |
| SNX6     | 516968  | 165  | 10  | 1121044 | 280172  | 0 | 5  | 0 | 0 | 50 | 63 | 22195888 | 4.20E-01 | 1 |
| CNR1     | 172187  | 799  | 37  | 1173020 | 346744  | 0 | 4  | 2 | 0 | 50 | 66 | 20591752 | 4.20E-01 | 1 |
| TBL1X    | 119145  | NaN  | -3  | 1507304 | 408688  | 0 | 5  | 1 | 0 | 3  | 1  | 1154152  | 4.20E-01 | 1 |
| CDKN2AIF | 235218  | 163  | 16  | 1433612 | 436456  | 0 | 4  | 1 | 0 | 50 | 44 | 18474620 | 4.20E-01 | 1 |
| NBR1     | 1341175 | 172  | 25  | 2503748 | 679960  | 0 | 11 | 2 | 0 | 50 | 70 | 21371748 | 4.20E-01 | 1 |
| CD300LD  | 698491  | 504  | 10  | 662516  | 192952  | 0 | 2  | 0 | 0 | 50 | 63 | 19807128 | 4.20E-01 | 1 |
| CCT6B    | 268361  | 579  | -14 | 1377008 | 381988  | 0 | 6  | 2 | 0 | 50 | 46 | 18612392 | 4.20E-01 | 1 |
| GLIPR1   | 513848  | 606  | -10 | 692064  | 184764  | 0 | 3  | 0 | 0 | 50 | 49 | 18252832 | 4.20E-01 | 1 |
| SLC41A2  | 759566  | 294  | 30  | 1469212 | 408332  | 0 | 5  | 2 | 0 | 50 | 56 | 22524832 | 4.20E-01 | 1 |
| FAM96B   | 942986  | 142  | 34  | 420436  | 126380  | 0 | 2  | 0 | 0 | 50 | 65 | 21541916 | 4.20E-01 | 1 |
| LCE3A    | 285984  | 752  | 17  | 226416  | 60876   | 0 | 1  | 0 | 0 | 50 | 58 | 22596388 | 4.20E-01 | 1 |
| SLC25A16 | 782017  | 294  | 35  | 856892  | 244216  | 0 | 3  | 0 | 0 | 50 | 82 | 24510956 | 4.20E-01 | 1 |
| ERO1L    | 314095  | 313  | 11  | 1270920 | 295836  | 0 | 3  | 0 | 0 | 50 | 46 | 19692852 | 4.20E-01 | 1 |
| MSRB3    | 324747  | 580  | 3   | 571024  | 158420  | 0 | 1  | 0 | 0 | 50 | 57 | 19941340 | 4.20E-01 | 1 |

|           |         |      |     |         |        |   |    |   |   |    |     |          |          |   |
|-----------|---------|------|-----|---------|--------|---|----|---|---|----|-----|----------|----------|---|
| RPL23A    | 1695792 | 208  | 40  | 410112  | 112140 | 0 | 2  | 0 | 0 | 50 | 81  | 25518436 | 4.21E-01 | 1 |
| TCTE3     | 233648  | 447  | 3   | 524744  | 129940 | 0 | 2  | 0 | 0 | 50 | 61  | 23526260 | 4.21E-01 | 1 |
| DCT       | 123751  | 906  | 0   | 1425424 | 384836 | 0 | 9  | 3 | 0 | 6  | 4   | 1470636  | 4.21E-01 | 1 |
| CLEC3B    | 479578  | 326  | 41  | 516556  | 144536 | 0 | 2  | 0 | 0 | 50 | 48  | 19950952 | 4.21E-01 | 1 |
| PLCL2     | 105775  | 400  | 15  | 2854764 | 776436 | 0 | 13 | 2 | 0 | 39 | 41  | 14488844 | 4.21E-01 | 1 |
| DMRTA1    | 160489  | 448  | -26 | 1214672 | 407620 | 0 | 5  | 0 | 0 | 33 | 61  | 18425848 | 4.21E-01 | 1 |
| MATN4     | 1005559 | 233  | 36  | 1463160 | 440016 | 0 | 8  | 2 | 0 | 50 | 49  | 17548664 | 4.21E-01 | 1 |
| COL19A1   | 93520   | 947  | 15  | 2999300 | 876472 | 0 | 13 | 2 | 0 | 42 | 53  | 17309788 | 4.21E-01 | 1 |
| HSD17B12  | 432669  | 791  | 0   | 819868  | 225704 | 0 | 2  | 0 | 0 | 50 | 55  | 19760136 | 4.21E-01 | 1 |
| IIST1H2BI | 390169  | 544  | 57  | 312212  | 96832  | 0 | 2  | 2 | 0 | 15 | 17  | 2533296  | 4.21E-01 | 1 |
| ZNF773    | 459366  | 828  | -31 | 1146676 | 285512 | 0 | 6  | 0 | 0 | 33 | 27  | 10916384 | 4.21E-01 | 1 |
| OR14J1    | 176114  | 872  | 4   | 783556  | 247064 | 0 | 6  | 2 | 0 | 10 | 15  | 3512296  | 4.21E-01 | 1 |
| EYA2      | 306082  | 522  | 36  | 1401572 | 389464 | 0 | 5  | 2 | 0 | 38 | 28  | 13583180 | 4.21E-01 | 1 |
| RERGL     | 21334   | 1070 | -35 | 541476  | 137772 | 0 | 3  | 0 | 0 | 50 | 121 | 22337220 | 4.21E-01 | 1 |
| ID2       | 215150  | 559  | 11  | 345676  | 95408  | 0 | 1  | 0 | 0 | 50 | 48  | 22997956 | 4.21E-01 | 1 |
| OR13G1    | 191710  | 995  | -32 | 762196  | 224636 | 0 | 4  | 1 | 0 | 50 | 116 | 25277780 | 4.21E-01 | 1 |
| CLEC4D    | 321790  | 564  | 13  | 579568  | 133856 | 0 | 3  | 0 | 0 | 50 | 64  | 21703896 | 4.21E-01 | 1 |
| RNASEH1   | 254257  | NaN  | 15  | 754720  | 196868 | 0 | 3  | 0 | 0 | 50 | 52  | 20982640 | 4.22E-01 | 1 |
| DARS2     | 442819  | 385  | 11  | 1683524 | 454612 | 0 | 6  | 0 | 0 | 4  | 6   | 2101824  | 4.22E-01 | 1 |
| ZMYND12   | 571804  | 519  | 24  | 969388  | 233180 | 0 | 4  | 0 | 0 | 50 | 62  | 19023928 | 4.22E-01 | 1 |
| TRAM1     | 240060  | 535  | 28  | 985052  | 259168 | 0 | 3  | 1 | 0 | 50 | 48  | 18331864 | 4.22E-01 | 1 |
| ATP6AP2   | 456094  | NaN  | 63  | 906732  | 254184 | 0 | 4  | 1 | 0 | 50 | 49  | 18942760 | 4.22E-01 | 1 |
| OSR2      | 113665  | 228  | 33  | 800288  | 211108 | 0 | 4  | 1 | 0 | 50 | 60  | 19864444 | 4.22E-01 | 1 |
| ITGAE     | 500884  | 176  | 28  | 3055548 | 855468 | 0 | 11 | 4 | 0 | 13 | 21  | 8207224  | 4.22E-01 | 1 |
| G6PC3     | 916863  | 198  | 23  | 864368  | 268780 | 0 | 3  | 1 | 0 | 50 | 69  | 17825988 | 4.22E-01 | 1 |
| LMOD2     | 86849   | 536  | -10 | 1380568 | 383768 | 0 | 6  | 2 | 0 | 34 | 43  | 15813876 | 4.23E-01 | 1 |
| LIN7B     | 2011861 | 267  | 47  | 528660  | 165540 | 0 | 1  | 0 | 0 | 50 | 71  | 20637320 | 4.23E-01 | 1 |
| ERGIC1    | 502164  | 179  | 47  | 772520  | 198292 | 0 | 2  | 0 | 0 | 50 | 48  | 19182348 | 4.23E-01 | 1 |
| FSHR      | 59778   | 1096 | -9  | 1778932 | 489500 | 0 | 5  | 4 | 0 | 46 | 69  | 21913936 | 4.23E-01 | 1 |
| GALNTL5   | 309129  | 476  | 12  | 1161628 | 295124 | 0 | 6  | 1 | 0 | 50 | 55  | 20641236 | 4.23E-01 | 1 |
| GPAM      | 166177  | 679  | -13 | 2157004 | 584552 | 0 | 5  | 0 | 0 | 6  | 3   | 4186560  | 4.24E-01 | 1 |
| SLC43A2   | 1362107 | 198  | 29  | 1451412 | 430404 | 0 | 5  | 2 | 0 | 50 | 71  | 22263884 | 4.24E-01 | 1 |
| CCS       | 1343990 | 194  | 62  | 706660  | 206480 | 0 | 1  | 1 | 0 | 50 | 53  | 20002216 | 4.24E-01 | 1 |



|          |         |      |     |          |         |   |    |    |   |    |     |          |          |   |
|----------|---------|------|-----|----------|---------|---|----|----|---|----|-----|----------|----------|---|
| TTC36    | 1348757 | 167  | 48  | 466004   | 151300  | 0 | 2  | 0  | 0 | 50 | 63  | 22637684 | 4.24E-01 | 1 |
| XG       | 202643  | NaN  | 23  | 544324   | 129584  | 0 | 2  | 1  | 0 | 25 | 31  | 10822756 | 4.24E-01 | 1 |
| CRYBA4   | 161795  | 547  | -4  | 516912   | 135636  | 0 | 3  | 0  | 0 | 50 | 73  | 22494216 | 4.24E-01 | 1 |
| EPB41L4A | 164575  | 671  | 28  | 1832332  | 462800  | 0 | 4  | 1  | 0 | 50 | 34  | 18381704 | 4.25E-01 | 1 |
| NR1I3    | 731911  | 229  | 39  | 1024212  | 281952  | 0 | 3  | 1  | 0 | 11 | 18  | 6488100  | 4.25E-01 | 1 |
| PDZD9    | 643750  | 326  | 44  | 533644   | 133856  | 0 | 1  | 1  | 0 | 23 | 27  | 8781808  | 4.25E-01 | 1 |
| AGPAT9   | 186399  | 436  | 21  | 1129944  | 310788  | 0 | 3  | 1  | 0 | 50 | 51  | 18717768 | 4.25E-01 | 1 |
| ZSCAN1   | 1187584 | 694  | -42 | 1011396  | 311856  | 0 | 4  | 2  | 0 | 50 | 67  | 17473904 | 4.25E-01 | 1 |
| AKAP11   | 183147  | 411  | 51  | 4849788  | 1291212 | 0 | 11 | 2  | 0 | 10 | 4   | 3684244  | 4.25E-01 | 1 |
| CCDC65   | 1696692 | 214  | 56  | 1270208  | 313636  | 0 | 5  | 1  | 0 | 50 | 56  | 19121116 | 4.25E-01 | 1 |
| SENP8    | 1132082 | 352  | 26  | 547528   | 139196  | 0 | 2  | 0  | 0 | 50 | 50  | 20825288 | 4.25E-01 | 1 |
| RAB20    | 495660  | 278  | 39  | 588112   | 169100  | 0 | 2  | 0  | 0 | 50 | 44  | 18578216 | 4.25E-01 | 1 |
| ATP6V0E1 | 489007  | 309  | 40  | 220720   | 56960   | 0 | 1  | 0  | 0 | 50 | 45  | 17333640 | 4.25E-01 | 1 |
| PSMD11   | 657957  | 438  | 15  | 1114636  | 296192  | 0 | 3  | 1  | 0 | 50 | 56  | 19207980 | 4.25E-01 | 1 |
| GTF2A1   | 206731  | 456  | -16 | 988968   | 253116  | 0 | 3  | 0  | 0 | 50 | 46  | 16194796 | 4.25E-01 | 1 |
| RALY     | 873171  | 398  | 61  | 780352   | 237452  | 0 | 4  | 0  | 0 | 50 | 61  | 20893284 | 4.25E-01 | 1 |
| CSN1S1   | 9744    | 991  | 0   | 550376   | 110716  | 0 | 2  | 0  | 0 | 50 | 64  | 17401280 | 4.26E-01 | 1 |
| ANKRD23  | 822597  | 392  | 46  | 784980   | 231756  | 0 | 4  | 0  | 0 | 50 | 86  | 27656572 | 4.26E-01 | 1 |
| MDN1     | 372470  | 603  | 34  | 14470332 | 3893928 | 0 | 37 | 10 | 0 | 49 | 35  | 20900404 | 4.26E-01 | 1 |
| FANCM    | 234454  | 565  | 8   | 5311520  | 1349596 | 0 | 17 | 6  | 0 | 50 | 62  | 22971256 | 4.26E-01 | 1 |
| CSRNP2   | 564607  | 155  | 40  | 1352444  | 407620  | 0 | 3  | 2  | 0 | 50 | 43  | 19587832 | 4.26E-01 | 1 |
| ATXN7    | 156786  | 683  | 8   | 2424360  | 728376  | 0 | 5  | 0  | 0 | 13 | 23  | 10900008 | 4.26E-01 | 1 |
| FAM195A  | 1115707 | 213  | 39  | 407976   | 124956  | 0 | 2  | 0  | 0 | 50 | 53  | 16969808 | 4.26E-01 | 1 |
| PPP1R12B | 770535  | 377  | 32  | 2738352  | 754008  | 0 | 10 | 2  | 0 | 40 | 58  | 19454332 | 4.26E-01 | 1 |
| IFNA8    | 242654  | 411  | -6  | 481312   | 129584  | 0 | 1  | 0  | 0 | 50 | 34  | 19573236 | 4.26E-01 | 1 |
| CHD4     | 2790851 | 179  | 51  | 4999308  | 1296552 | 0 | 23 | 5  | 0 | 23 | 47  | 14312980 | 4.26E-01 | 1 |
| GABRP    | 216977  | 618  | 19  | 1148100  | 303312  | 0 | 3  | 0  | 0 | 31 | 21  | 9847316  | 4.26E-01 | 1 |
| TAF1L    | 567793  | 334  | 5   | 4594180  | 1261664 | 0 | 16 | 3  | 0 | 34 | 36  | 16518400 | 4.26E-01 | 1 |
| HSPA13   | 155439  | 938  | 7   | 1193312  | 338200  | 0 | 5  | 0  | 0 | 28 | 24  | 10999332 | 4.26E-01 | 1 |
| OR2L3    | 20939   | 1015 | -27 | 770028   | 232824  | 0 | 4  | 1  | 0 | 50 | 119 | 22654060 | 4.27E-01 | 1 |
| GZMM     | 1647685 | 255  | -8  | 631188   | 214668  | 0 | 3  | 1  | 0 | 50 | 56  | 18766896 | 4.27E-01 | 1 |
| KRT19    | 1445853 | 325  | -22 | 995732   | 310432  | 0 | 7  | 4  | 0 | 3  | 8   | 1320048  | 4.27E-01 | 1 |
| KCNJ1    | 194422  | 602  | 1   | 987900   | 274476  | 0 | 4  | 1  | 0 | 50 | 53  | 20284524 | 4.27E-01 | 1 |

|          |         |      |     |          |         |   |    |    |   |    |     |          |          |   |
|----------|---------|------|-----|----------|---------|---|----|----|---|----|-----|----------|----------|---|
| HKDC1    | 726042  | 168  | 42  | 2348888  | 665008  | 0 | 8  | 3  | 0 | 50 | 69  | 20753732 | 4.27E-01 | 1 |
| ZNF555   | 1287128 | 291  | 27  | 1625140  | 402992  | 0 | 6  | 2  | 0 | 50 | 60  | 21755516 | 4.27E-01 | 1 |
| IRF2BP1  | 883734  | 203  | 39  | 1383416  | 490924  | 0 | 5  | 4  | 0 | 50 | 63  | 19718840 | 4.27E-01 | 1 |
| MAMDC2   | 196190  | 405  | -10 | 1794952  | 461732  | 0 | 5  | 0  | 0 | 23 | 23  | 12462848 | 4.27E-01 | 1 |
| TUBA1B   | 2141275 | 214  | 56  | 1133148  | 327876  | 0 | 4  | 2  | 0 | 50 | 78  | 23413408 | 4.27E-01 | 1 |
| SLC24A4  | 368522  | 642  | 27  | 1575300  | 436812  | 0 | 7  | 1  | 0 | 4  | 5   | 2882176  | 4.27E-01 | 1 |
| C1orf116 | 451418  | 155  | 25  | 1466720  | 474904  | 0 | 6  | 0  | 0 | 11 | 14  | 4812764  | 4.28E-01 | 1 |
| CYP39A1  | 113763  | 596  | 0   | 1240660  | 312212  | 0 | 3  | 0  | 0 | 31 | 19  | 13249964 | 4.28E-01 | 1 |
| CYB5RL   | 465615  | 313  | 26  | 814172   | 223924  | 0 | 3  | 1  | 0 | 50 | 63  | 18381348 | 4.29E-01 | 1 |
| MPP7     | 245887  | 473  | -2  | 1531512  | 381276  | 0 | 6  | 1  | 0 | 34 | 33  | 13547224 | 4.29E-01 | 1 |
| ZHX3     | 383198  | 262  | 7   | 2377368  | 693132  | 0 | 8  | 1  | 0 | 50 | 71  | 29215496 | 4.29E-01 | 1 |
| CTSD     | NaN     | NaN  | NaN | 1038808  | 318620  | 0 | 5  | 1  | 0 | 50 | 117 | 39964204 | 4.29E-01 | 1 |
| EIF3M    | 408431  | 613  | 7   | 1003208  | 245284  | 0 | 6  | 1  | 0 | 50 | 68  | 19100468 | 4.29E-01 | 1 |
| TRAT1    | 107009  | 961  | -15 | 503740   | 116768  | 0 | 3  | 1  | 0 | 13 | 24  | 6630144  | 4.29E-01 | 1 |
| UBASH3A  | 366755  | 400  | 71  | 1709512  | 473480  | 0 | 8  | 1  | 0 | 17 | 21  | 6055560  | 4.29E-01 | 1 |
| RBM46    | 73501   | 1021 | -18 | 1363124  | 364900  | 0 | 5  | 0  | 0 | 31 | 41  | 13756908 | 4.29E-01 | 1 |
| HAUS4    | 1240941 | 185  | 38  | 957284   | 247420  | 0 | 3  | 1  | 0 | 50 | 66  | 21938144 | 4.29E-01 | 1 |
| PXDN     | 55677   | 536  | -18 | 3742984  | 1095056 | 0 | 13 | 7  | 0 | 50 | 69  | 20643016 | 4.29E-01 | 1 |
| CLDN9    | 1443513 | 234  | 49  | 507656   | 190816  | 0 | 2  | 1  | 0 | 50 | 48  | 18953440 | 4.29E-01 | 1 |
| GUCY2C   | 339860  | 720  | 4   | 2830912  | 721256  | 0 | 13 | 2  | 0 | 36 | 48  | 13646548 | 4.29E-01 | 1 |
| CYB561D2 | 843769  | 206  | 51  | 533644   | 193664  | 0 | 2  | 0  | 0 | 50 | 68  | 20472848 | 4.30E-01 | 1 |
| ZFYVE27  | 535311  | 138  | 44  | 1083664  | 302600  | 0 | 3  | 1  | 0 | 50 | 47  | 17131076 | 4.30E-01 | 1 |
| RBPM2    | 803907  | 264  | 47  | 539340   | 163404  | 0 | 2  | 0  | 0 | 50 | 50  | 20007556 | 4.30E-01 | 1 |
| ZDHHC22  | 531874  | 235  | 59  | 645072   | 209328  | 0 | 3  | 1  | 0 | 50 | 65  | 20921052 | 4.30E-01 | 1 |
| ANK3     | 213806  | 634  | -8  | 11343940 | 3220376 | 0 | 35 | 10 | 0 | 42 | 46  | 23187348 | 4.30E-01 | 1 |
| AKIRIN2  | 235638  | 346  | 33  | 520116   | 150588  | 0 | 1  | 0  | 0 | 50 | 51  | 19368536 | 4.30E-01 | 1 |
| DAPK2    | 678778  | 261  | 45  | 985052   | 250624  | 0 | 2  | 0  | 0 | 35 | 36  | 16052396 | 4.30E-01 | 1 |
| RIPK1    | 437184  | 268  | 41  | 1750096  | 441440  | 0 | 5  | 1  | 0 | 50 | 44  | 17864792 | 4.30E-01 | 1 |
| SF1      | 2261775 | 230  | 61  | 2086516  | 563192  | 0 | 8  | 2  | 0 | 50 | 77  | 23145696 | 4.30E-01 | 1 |
| KCTD16   | 38690   | 643  | -2  | 1080460  | 298328  | 0 | 4  | 0  | 0 | 45 | 58  | 18926028 | 4.30E-01 | 1 |
| NHLRC2   | 266343  | 515  | 18  | 1857964  | 514064  | 0 | 6  | 0  | 0 | 50 | 48  | 20148176 | 4.31E-01 | 1 |
| EZH2     | 564321  | 434  | 13  | 2006416  | 484160  | 0 | 5  | 3  | 0 | 42 | 45  | 16803912 | 4.31E-01 | 1 |
| SYP      | 724395  | NaN  | 44  | 800288   | 233536  | 0 | 3  | 1  | 0 | 50 | 48  | 21089440 | 4.31E-01 | 1 |

|          |         |     |     |         |         |   |    |   |   |    |     |          |          |   |
|----------|---------|-----|-----|---------|---------|---|----|---|---|----|-----|----------|----------|---|
| RFX7     | 204396  | 432 | -2  | 3665020 | 1050200 | 0 | 8  | 2 | 0 | 50 | 47  | 21644800 | 4.31E-01 | 1 |
| MAGEB18  | 33808   | NaN | -25 | 870420  | 240300  | 0 | 4  | 1 | 0 | 50 | 122 | 28429092 | 4.31E-01 | 1 |
| FOXD4    | 230380  | 398 | -4  | 1045572 | 364188  | 0 | 3  | 0 | 0 | 50 | 40  | 20962704 | 4.31E-01 | 1 |
| SLCO1B1  | 518292  | 799 | -25 | 1801360 | 475616  | 0 | 8  | 2 | 0 | 50 | 56  | 16996864 | 4.31E-01 | 1 |
| LRRC3    | 893345  | 411 | 43  | 616236  | 210396  | 0 | 3  | 0 | 0 | 50 | 74  | 24237192 | 4.31E-01 | 1 |
| CDC20    | 1088321 | 252 | 27  | 1276260 | 370596  | 0 | 4  | 1 | 0 | 28 | 33  | 12199408 | 4.31E-01 | 1 |
| PTP4A2   | 1200691 | 128 | 37  | 452120  | 103240  | 0 | 3  | 1 | 0 | 6  | 14  | 3647576  | 4.31E-01 | 1 |
| OR4X2    | 400891  | 509 | -27 | 748312  | 225704  | 0 | 5  | 2 | 0 | 23 | 30  | 6925980  | 4.31E-01 | 1 |
| SLC17A6  | 51732   | 865 | -14 | 1504100 | 410824  | 0 | 7  | 2 | 0 | 28 | 53  | 15922100 | 4.31E-01 | 1 |
| GCA      | 70731   | 856 | -5  | 587044  | 141332  | 0 | 1  | 1 | 0 | 50 | 70  | 21216532 | 4.31E-01 | 1 |
| PLAUR    | 441738  | 209 | 6   | 944824  | 257744  | 0 | 5  | 2 | 0 | 14 | 16  | 4113936  | 4.31E-01 | 1 |
| CD52     | 1021101 | 217 | 22  | 162336  | 42720   | 0 | 1  | 0 | 0 | 50 | 66  | 18554720 | 4.32E-01 | 1 |
| GNA12    | 764046  | 392 | 30  | 959420  | 277324  | 0 | 3  | 0 | 0 | 37 | 45  | 15777564 | 4.32E-01 | 1 |
| RIC8B    | 230956  | 396 | 11  | 1334644 | 368816  | 0 | 4  | 0 | 0 | 48 | 65  | 24424804 | 4.32E-01 | 1 |
| FAM86B1  | 475976  | 625 | -1  | 751516  | 227840  | 0 | 2  | 0 | 0 | 50 | 75  | 22680048 | 4.32E-01 | 1 |
| C18orf54 | 109698  | 451 | 33  | 977932  | 247064  | 0 | 2  | 0 | 0 | 47 | 61  | 23463604 | 4.32E-01 | 1 |
| FCER1G   | 728669  | 234 | 37  | 233180  | 64792   | 0 | 1  | 0 | 0 | 39 | 44  | 15898604 | 4.32E-01 | 1 |
| CYP27B1  | 1160849 | 344 | 39  | 1247780 | 417232  | 0 | 7  | 0 | 0 | 6  | 9   | 2599512  | 4.32E-01 | 1 |
| ARL15    | 83263   | 721 | 5   | 536492  | 139552  | 0 | 3  | 0 | 0 | 50 | 68  | 24803588 | 4.32E-01 | 1 |
| TNFRSF17 | 571257  | 441 | 64  | 474192  | 127092  | 0 | 2  | 0 | 0 | 50 | 53  | 19474268 | 4.32E-01 | 1 |
| RHBDL2   | 603263  | 318 | 27  | 789964  | 209684  | 0 | 3  | 1 | 0 | 50 | 41  | 18959136 | 4.33E-01 | 1 |
| CCR8     | 159083  | 507 | 38  | 896052  | 248844  | 0 | 3  | 1 | 0 | 50 | 75  | 21803932 | 4.33E-01 | 1 |
| AKR1C4   | 630098  | 678 | -21 | 850840  | 223568  | 0 | 4  | 0 | 0 | 50 | 58  | 17840940 | 4.33E-01 | 1 |
| HSPA1L   | 2509866 | 183 | 32  | 1586336 | 474904  | 0 | 7  | 0 | 0 | 4  | 3   | 2300472  | 4.33E-01 | 1 |
| VAV1     | 739481  | 272 | 31  | 2244936 | 578856  | 0 | 8  | 2 | 0 | 41 | 60  | 20240736 | 4.33E-01 | 1 |
| SCG3     | 415519  | 247 | 27  | 1257748 | 291920  | 0 | 4  | 0 | 0 | 29 | 46  | 15403764 | 4.33E-01 | 1 |
| DSG4     | 260152  | 412 | -4  | 2760068 | 768604  | 0 | 8  | 2 | 0 | 50 | 35  | 20426212 | 4.33E-01 | 1 |
| HSPA6    | 741254  | 448 | 41  | 1572808 | 490568  | 0 | 6  | 2 | 0 | 50 | 66  | 22531596 | 4.33E-01 | 1 |
| PROCA1   | 1695792 | 208 | 40  | 866148  | 228552  | 0 | 4  | 1 | 0 | 50 | 81  | 25518436 | 4.33E-01 | 1 |
| DKK1     | 94567   | 519 | -8  | 673908  | 194376  | 0 | 2  | 2 | 0 | 12 | 13  | 5276632  | 4.34E-01 | 1 |
| AP2B1    | 715620  | 196 | 9   | 2458180 | 681740  | 0 | 11 | 1 | 0 | 27 | 29  | 12335756 | 4.34E-01 | 1 |
| KLHL2    | 171218  | 540 | 5   | 1597728 | 407976  | 0 | 6  | 0 | 0 | 14 | 12  | 5229996  | 4.34E-01 | 1 |
| LYVE1    | 755456  | 391 | 25  | 822716  | 233536  | 0 | 1  | 1 | 0 | 50 | 63  | 27469316 | 4.34E-01 | 1 |

|         |         |      |     |         |         |   |    |   |   |    |    |          |          |   |
|---------|---------|------|-----|---------|---------|---|----|---|---|----|----|----------|----------|---|
| SPAG6   | 177548  | 462  | 14  | 1312216 | 364544  | 0 | 3  | 0 | 0 | 21 | 20 | 9504488  | 4.34E-01 | 1 |
| TCHHL1  | 527465  | 349  | 35  | 2278400 | 629764  | 0 | 9  | 3 | 0 | 50 | 62 | 21594604 | 4.34E-01 | 1 |
| SPATA5  | 100687  | 528  | 11  | 2280180 | 650412  | 0 | 10 | 1 | 0 | 45 | 62 | 24193048 | 4.34E-01 | 1 |
| A2M     | 348389  | 364  | 17  | 3808132 | 1067288 | 0 | 11 | 4 | 0 | 30 | 41 | 16277744 | 4.34E-01 | 1 |
| GLTPD2  | 1272092 | 222  | 28  | 695624  | 257032  | 0 | 2  | 0 | 0 | 50 | 74 | 23892584 | 4.34E-01 | 1 |
| CCDC137 | 3745109 | 205  | 30  | 742616  | 210040  | 0 | 1  | 0 | 0 | 33 | 25 | 10695308 | 4.34E-01 | 1 |
| PROSC   | 651180  | 379  | 15  | 719832  | 196512  | 0 | 3  | 0 | 0 | 50 | 48 | 21015748 | 4.34E-01 | 1 |
| HTR1D   | 956630  | 169  | 10  | 911004  | 300108  | 0 | 4  | 0 | 0 | 50 | 56 | 20074484 | 4.34E-01 | 1 |
| LRRTM1  | 10982   | 1577 | -18 | 1282668 | 397296  | 0 | 8  | 5 | 0 | 11 | 12 | 3017812  | 4.34E-01 | 1 |
| ARHGAP2 | 466144  | 327  | -9  | 3286948 | 850484  | 0 | 11 | 3 | 0 | 38 | 40 | 14690340 | 4.35E-01 | 1 |
| ZNF774  | 1110178 | 139  | 33  | 1253476 | 310076  | 0 | 6  | 1 | 0 | 50 | 72 | 20041376 | 4.35E-01 | 1 |
| SMPD3   | 794719  | 279  | 46  | 1625852 | 501604  | 0 | 5  | 2 | 0 | 50 | 56 | 20638032 | 4.35E-01 | 1 |
| IL1A    | 578617  | 298  | 38  | 716984  | 180136  | 0 | 1  | 0 | 0 | 50 | 43 | 18472484 | 4.35E-01 | 1 |
| CNTNAP2 | 4892    | 1115 | -31 | 3464592 | 901392  | 0 | 20 | 6 | 0 | 20 | 49 | 8153112  | 4.35E-01 | 1 |
| UFM1    | 126181  | 926  | -9  | 232468  | 64436   | 0 | 1  | 0 | 0 | 50 | 61 | 23706752 | 4.35E-01 | 1 |
| EID2    | 1148741 | 322  | 25  | 566752  | 192596  | 0 | 2  | 0 | 0 | 50 | 44 | 18982632 | 4.35E-01 | 1 |
| NOL12   | 1136064 | 180  | 65  | 548240  | 160912  | 0 | 2  | 1 | 0 | 24 | 18 | 7824168  | 4.35E-01 | 1 |
| OR10C1  | 404210  | 854  | 21  | 741548  | 260236  | 0 | 3  | 2 | 0 | 12 | 14 | 5210416  | 4.35E-01 | 1 |
| SULT6B1 | 545763  | 253  | 35  | 714492  | 165540  | 0 | 3  | 0 | 0 | 50 | 60 | 22530884 | 4.35E-01 | 1 |
| IL12RB2 | 454381  | 466  | -4  | 2224288 | 604844  | 0 | 7  | 1 | 0 | 22 | 23 | 8102204  | 4.35E-01 | 1 |
| ABRA    | 113560  | 708  | 18  | 964048  | 266288  | 0 | 4  | 0 | 0 | 50 | 51 | 19230052 | 4.35E-01 | 1 |
| UGT3A1  | 155890  | 614  | -4  | 1396944 | 393024  | 0 | 5  | 2 | 0 | 50 | 47 | 22782220 | 4.35E-01 | 1 |
| ASB14   | 399197  | 454  | 29  | 1537920 | 420792  | 0 | 2  | 0 | 0 | 50 | 37 | 23351820 | 4.35E-01 | 1 |
| C9      | 168073  | 424  | -8  | 1466364 | 372732  | 0 | 6  | 2 | 0 | 50 | 45 | 20095488 | 4.35E-01 | 1 |
| FTH1    | 2389859 | 185  | 53  | 483092  | 119260  | 0 | 4  | 0 | 0 | 50 | 70 | 19465368 | 4.36E-01 | 1 |
| PCDHB11 | 915569  | 724  | -11 | 1938064 | 618728  | 0 | 11 | 0 | 0 | 0  | 0  | 618728   | 4.36E-01 | 1 |
| IL20RA  | 133090  | 449  | 24  | 1407980 | 392668  | 0 | 4  | 1 | 0 | 50 | 54 | 18719904 | 4.36E-01 | 1 |
| ZEB1    | 323935  | 635  | 16  | 2897484 | 756144  | 0 | 12 | 0 | 0 | 8  | 9  | 4998240  | 4.36E-01 | 1 |
| LCE3D   | 285984  | 752  | 17  | 233536  | 68708   | 0 | 1  | 1 | 0 | 10 | 6  | 2606988  | 4.36E-01 | 1 |
| ASPA    | 403115  | 442  | 6   | 822004  | 209684  | 0 | 3  | 1 | 0 | 50 | 47 | 17754432 | 4.36E-01 | 1 |
| PRKRA   | 159623  | 482  | 29  | 850484  | 217516  | 0 | 3  | 0 | 0 | 50 | 60 | 23941356 | 4.36E-01 | 1 |
| SSB     | 338901  | 489  | 35  | 1140980 | 260236  | 0 | 3  | 0 | 0 | 50 | 36 | 15621992 | 4.36E-01 | 1 |
| PSMD12  | 486488  | 285  | -1  | 1205060 | 304024  | 0 | 4  | 1 | 0 | 50 | 64 | 24095148 | 4.36E-01 | 1 |

|          |         |     |     |         |         |   |    |   |   |    |     |          |          |   |
|----------|---------|-----|-----|---------|---------|---|----|---|---|----|-----|----------|----------|---|
| EED      | 443833  | 159 | 26  | 1181920 | 283376  | 0 | 4  | 1 | 0 | 39 | 61  | 18906804 | 4.36E-01 | 1 |
| OR6C75   | 667726  | 802 | -14 | 772164  | 229620  | 0 | 3  | 0 | 0 | 50 | 83  | 19448636 | 4.36E-01 | 1 |
| SNAI1    | 575200  | 181 | 51  | 657532  | 202208  | 0 | 3  | 0 | 0 | 50 | 63  | 20381712 | 4.36E-01 | 1 |
| BAX      | 1927185 | 211 | 43  | 642224  | 192952  | 0 | 1  | 1 | 0 | 50 | 57  | 20562560 | 4.36E-01 | 1 |
| C1QL1    | 1037808 | 191 | 34  | 627984  | 206124  | 0 | 3  | 0 | 0 | 50 | 53  | 17876540 | 4.36E-01 | 1 |
| PRSS12   | 161497  | 917 | 1   | 2229984 | 630120  | 0 | 8  | 2 | 0 | 50 | 51  | 17698184 | 4.36E-01 | 1 |
| F13A1    | 44522   | 696 | 22  | 1898192 | 510148  | 0 | 6  | 1 | 0 | 50 | 52  | 21251420 | 4.37E-01 | 1 |
| C6orf58  | 169285  | 807 | -9  | 865792  | 218228  | 0 | 3  | 0 | 0 | 50 | 67  | 21086592 | 4.37E-01 | 1 |
| PRDM16   | 248448  | 632 | 16  | 3234260 | 927736  | 0 | 12 | 2 | 0 | 7  | 8   | 3723048  | 4.37E-01 | 1 |
| AR       | 106188  | NaN | -7  | 2318272 | 686012  | 0 | 6  | 1 | 0 | 50 | 51  | 20492784 | 4.37E-01 | 1 |
| TEX9     | 208204  | 604 | 13  | 1065152 | 244216  | 0 | 4  | 1 | 0 | 50 | 61  | 19072700 | 4.37E-01 | 1 |
| MYLPF    | 2312884 | 165 | 47  | 466716  | 107868  | 0 | 2  | 0 | 0 | 50 | 59  | 19035320 | 4.37E-01 | 1 |
| SS18L2   | 350455  | 445 | 42  | 208616  | 51976   | 0 | 1  | 0 | 0 | 50 | 64  | 22168832 | 4.37E-01 | 1 |
| KIAA1324 | 994979  | 215 | 25  | 2617668 | 720900  | 0 | 9  | 2 | 0 | 50 | 81  | 21774028 | 4.37E-01 | 1 |
| EPS15    | 568927  | 251 | 11  | 2456044 | 625136  | 0 | 10 | 2 | 0 | 31 | 55  | 17860876 | 4.37E-01 | 1 |
| MYO10    | 275988  | 622 | -15 | 5371328 | 1396588 | 0 | 13 | 4 | 0 | 8  | 6   | 3349960  | 4.37E-01 | 1 |
| C17orf80 | 205112  | 251 | -15 | 1564976 | 433252  | 0 | 4  | 0 | 0 | 8  | 8   | 3508024  | 4.37E-01 | 1 |
| SLC7A6   | 864889  | 281 | 38  | 1297976 | 393736  | 0 | 3  | 0 | 0 | 37 | 55  | 23126828 | 4.37E-01 | 1 |
| ERICH1   | 106263  | 889 | -34 | 1148100 | 297972  | 0 | 3  | 0 | 0 | 50 | 66  | 16358912 | 4.37E-01 | 1 |
| PF4V1    | 233432  | 444 | 6   | 267000  | 80100   | 0 | 1  | 0 | 0 | 50 | 46  | 21504892 | 4.37E-01 | 1 |
| IQCE     | 777967  | 226 | 44  | 1803496 | 516200  | 0 | 4  | 0 | 0 | 38 | 40  | 20296628 | 4.38E-01 | 1 |
| DUSP11   | 1051432 | 404 | 37  | 993240  | 254184  | 0 | 5  | 0 | 0 | 5  | 6   | 1679608  | 4.38E-01 | 1 |
| P4HTM    | 1799657 | 241 | 41  | 1417948 | 423284  | 0 | 4  | 2 | 0 | 50 | 76  | 22684320 | 4.38E-01 | 1 |
| FLOT1    | 2157341 | 147 | 43  | 1111432 | 311144  | 0 | 4  | 1 | 0 | 50 | 59  | 18860524 | 4.38E-01 | 1 |
| PRTN3    | 2168802 | 198 | 28  | 636884  | 205768  | 0 | 3  | 0 | 0 | 50 | 73  | 22578944 | 4.38E-01 | 1 |
| CYP4X1   | 388889  | 479 | 4   | 1335712 | 345320  | 0 | 4  | 0 | 0 | 5  | 3   | 2130660  | 4.38E-01 | 1 |
| TRIAP1   | 1573849 | 216 | 44  | 210396  | 44856   | 0 | 1  | 0 | 0 | 50 | 64  | 21461816 | 4.38E-01 | 1 |
| ZC3H6    | 593451  | 449 | 24  | 3046292 | 813460  | 0 | 12 | 2 | 0 | 25 | 30  | 12173776 | 4.38E-01 | 1 |
| SPATA22  | 365088  | 515 | 14  | 960132  | 240300  | 0 | 3  | 0 | 0 | 50 | 54  | 23562928 | 4.38E-01 | 1 |
| MAGEA12  | NaN     | NaN | NaN | 778928  | 234604  | 0 | 3  | 1 | 0 | 50 | 117 | 39880188 | 4.38E-01 | 1 |
| CDCA4    | 854493  | 205 | 30  | 597724  | 186188  | 0 | 3  | 1 | 0 | 50 | 86  | 25553680 | 4.38E-01 | 1 |
| ECE2     | 1453600 | 241 | 47  | 2722688 | 786760  | 0 | 10 | 1 | 0 | 11 | 9   | 3774312  | 4.38E-01 | 1 |
| TGFB1I1  | 839076  | 558 | 11  | 1180496 | 351016  | 0 | 4  | 1 | 0 | 50 | 75  | 22592472 | 4.38E-01 | 1 |

|          |         |     |     |         |         |   |    |   |   |    |     |          |          |   |
|----------|---------|-----|-----|---------|---------|---|----|---|---|----|-----|----------|----------|---|
| TMEM5    | 222270  | 460 | -17 | 1151660 | 294412  | 0 | 4  | 0 | 0 | 50 | 69  | 21300192 | 4.38E-01 | 1 |
| CD82     | 211161  | 551 | 20  | 705592  | 187256  | 0 | 2  | 0 | 0 | 50 | 34  | 18377432 | 4.39E-01 | 1 |
| LSM14B   | 838629  | 288 | -13 | 983984  | 286936  | 0 | 5  | 1 | 0 | 33 | 38  | 11186588 | 4.39E-01 | 1 |
| TUBB2A   | 444075  | 435 | 41  | 1131012 | 312924  | 0 | 6  | 1 | 0 | 50 | 79  | 25740224 | 4.39E-01 | 1 |
| CEP55    | 458453  | 249 | 17  | 1218588 | 305448  | 0 | 6  | 2 | 0 | 47 | 55  | 20630556 | 4.39E-01 | 1 |
| ASB4     | 176832  | 333 | 14  | 1148456 | 309364  | 0 | 5  | 1 | 0 | 50 | 46  | 19395948 | 4.39E-01 | 1 |
| STARD4   | 181104  | 636 | 26  | 546460  | 134924  | 0 | 2  | 0 | 0 | 49 | 49  | 19377080 | 4.39E-01 | 1 |
| ZPBP     | 135352  | 917 | -13 | 918836  | 243148  | 0 | 5  | 0 | 0 | 50 | 64  | 21012544 | 4.39E-01 | 1 |
| HCCS     | 80480   | NaN | 30  | 710932  | 176576  | 0 | 3  | 0 | 0 | 50 | 53  | 22365700 | 4.39E-01 | 1 |
| LRRK2    | 31336   | 994 | 12  | 6625872 | 1687440 | 0 | 36 | 9 | 0 | 3  | 13  | 4058044  | 4.39E-01 | 1 |
| ZNF577   | 435461  | 817 | -45 | 1250628 | 323604  | 0 | 3  | 0 | 0 | 31 | 33  | 10043472 | 4.39E-01 | 1 |
| KTI12    | NaN     | NaN | NaN | 848704  | 290852  | 0 | 4  | 2 | 0 | 50 | 118 | 39936436 | 4.39E-01 | 1 |
| FAM81B   | 316501  | 511 | 4   | 1205416 | 286580  | 0 | 6  | 1 | 0 | 50 | 57  | 21156368 | 4.39E-01 | 1 |
| BAIAP2L1 | 609918  | 249 | 36  | 1339984 | 356000  | 0 | 3  | 1 | 0 | 50 | 59  | 22786492 | 4.40E-01 | 1 |
| XRCC4    | 230543  | 717 | 8   | 892848  | 216804  | 0 | 3  | 0 | 0 | 31 | 20  | 10179464 | 4.40E-01 | 1 |
| PARL     | 1434591 | 408 | 37  | 990392  | 267712  | 0 | 6  | 0 | 0 | 21 | 25  | 7903912  | 4.40E-01 | 1 |
| SYCP2L   | 269928  | 483 | 20  | 2207912 | 520828  | 0 | 6  | 1 | 0 | 50 | 51  | 24288100 | 4.40E-01 | 1 |
| TRMT2A   | 545126  | 218 | 57  | 1571740 | 485228  | 0 | 7  | 1 | 0 | 33 | 49  | 14596356 | 4.40E-01 | 1 |
| MAP6     | 528316  | 227 | 45  | 1991108 | 634036  | 0 | 8  | 4 | 0 | 6  | 6   | 2939492  | 4.40E-01 | 1 |
| FSTL1    | 382340  | 375 | 23  | 831972  | 198648  | 0 | 1  | 0 | 0 | 50 | 40  | 20692500 | 4.40E-01 | 1 |
| TBC1D28  | 729405  | 435 | -2  | 561056  | 143824  | 0 | 2  | 0 | 0 | 50 | 43  | 18400572 | 4.40E-01 | 1 |
| LAMA2    | 67993   | 771 | -6  | 8108256 | 2171244 | 0 | 28 | 5 | 0 | 32 | 37  | 13785032 | 4.40E-01 | 1 |
| DDIT4    | 808655  | 145 | 40  | 566040  | 189036  | 0 | 2  | 1 | 0 | 50 | 45  | 18089784 | 4.40E-01 | 1 |
| SLC6A6   | 484954  | 242 | 47  | 1605204 | 446424  | 0 | 4  | 1 | 0 | 50 | 40  | 18304096 | 4.40E-01 | 1 |
| HSD17B10 | 920771  | NaN | 70  | 651836  | 211108  | 0 | 1  | 0 | 0 | 50 | 62  | 20770820 | 4.40E-01 | 1 |
| TRAF3IP3 | 220312  | 429 | 18  | 1454260 | 378428  | 0 | 4  | 0 | 0 | 49 | 54  | 21711728 | 4.40E-01 | 1 |
| RP9      | 376764  | 459 | 15  | 590604  | 144180  | 0 | 2  | 1 | 0 | 50 | 41  | 17280952 | 4.40E-01 | 1 |
| KITLG    | 144795  | 419 | -29 | 737988  | 178356  | 0 | 4  | 1 | 0 | 50 | 92  | 23051356 | 4.40E-01 | 1 |
| TAF1B    | 909213  | 197 | 43  | 1578860 | 370240  | 0 | 5  | 1 | 0 | 46 | 49  | 19690360 | 4.40E-01 | 1 |
| KLHL6    | 712779  | 593 | 32  | 1583132 | 437524  | 0 | 9  | 3 | 0 | 8  | 18  | 6035624  | 4.41E-01 | 1 |
| RNMTL1   | 662733  | 483 | 10  | 1050912 | 312924  | 0 | 4  | 0 | 0 | 5  | 8   | 3196168  | 4.41E-01 | 1 |
| RCN2     | 335583  | 614 | 27  | 846568  | 197936  | 0 | 3  | 0 | 0 | 50 | 65  | 26816412 | 4.41E-01 | 1 |
| CCL5     | 661778  | 235 | 20  | 237452  | 67996   | 0 | 1  | 0 | 0 | 50 | 59  | 19655472 | 4.41E-01 | 1 |

|          |         |      |     |         |        |   |   |   |   |    |    |          |          |   |
|----------|---------|------|-----|---------|--------|---|---|---|---|----|----|----------|----------|---|
| TMEM31   | 485629  | NaN  | 43  | 513352  | 117836 | 0 | 2 | 0 | 0 | 50 | 50 | 18367108 | 4.41E-01 | 1 |
| NRIP3    | 595760  | 357  | 33  | 622644  | 178356 | 0 | 2 | 0 | 0 | 50 | 60 | 26308044 | 4.41E-01 | 1 |
| C3AR1    | 142724  | 300  | 23  | 1191888 | 359916 | 0 | 4 | 2 | 0 | 50 | 43 | 20540844 | 4.41E-01 | 1 |
| CYP26A1  | 558273  | 470  | 18  | 1254188 | 373444 | 0 | 6 | 0 | 0 | 43 | 54 | 16544744 | 4.41E-01 | 1 |
| GRPEL1   | 459652  | 426  | 70  | 559632  | 153792 | 0 | 3 | 1 | 0 | 50 | 67 | 19324392 | 4.41E-01 | 1 |
| ADORA3   | 374092  | 330  | 27  | 1486300 | 419012 | 0 | 4 | 0 | 0 | 39 | 31 | 18074832 | 4.41E-01 | 1 |
| PHACTR2  | 346938  | 363  | 2   | 1657892 | 479176 | 0 | 5 | 1 | 0 | 31 | 32 | 12102932 | 4.41E-01 | 1 |
| C2orf61  | 738157  | 206  | 39  | 658244  | 181204 | 0 | 2 | 1 | 0 | 6  | 8  | 4933092  | 4.41E-01 | 1 |
| HSD17B13 | 474615  | 417  | 8   | 773944  | 218228 | 0 | 3 | 1 | 0 | 50 | 77 | 27451160 | 4.41E-01 | 1 |
| CENPB    | 860065  | 241  | 43  | 1466008 | 456392 | 0 | 7 | 1 | 0 | 50 | 63 | 24054564 | 4.41E-01 | 1 |
| CRMP1    | 101380  | 643  | 14  | 1780712 | 521896 | 0 | 6 | 3 | 0 | 50 | 47 | 17869420 | 4.42E-01 | 1 |
| FAM196A  | 92819   | 848  | -36 | 1197940 | 352796 | 0 | 5 | 0 | 0 | 5  | 4  | 2529024  | 4.42E-01 | 1 |
| FTO      | 215906  | 604  | -13 | 1312928 | 342472 | 0 | 3 | 0 | 0 | 44 | 37 | 16611316 | 4.42E-01 | 1 |
| FBXW4    | 764146  | 385  | 29  | 1041300 | 316128 | 0 | 3 | 2 | 0 | 50 | 54 | 20470712 | 4.42E-01 | 1 |
| CASQ1    | 841605  | 386  | 29  | 1053404 | 261304 | 0 | 5 | 0 | 0 | 50 | 48 | 19038524 | 4.42E-01 | 1 |
| MIPEP    | 262509  | 678  | 46  | 1865796 | 500892 | 0 | 9 | 1 | 0 | 43 | 41 | 13563956 | 4.42E-01 | 1 |
| RIOK3    | 311512  | 215  | 57  | 1384484 | 332860 | 0 | 4 | 1 | 0 | 50 | 59 | 20443300 | 4.42E-01 | 1 |
| QRSL1    | 227264  | 174  | 40  | 1360632 | 377004 | 0 | 4 | 1 | 0 | 50 | 60 | 16841648 | 4.42E-01 | 1 |
| SAMD4A   | 653012  | 376  | 38  | 1917060 | 551088 | 0 | 7 | 0 | 0 | 13 | 16 | 6539364  | 4.42E-01 | 1 |
| BUD31    | 1327454 | 288  | 60  | 390176  | 91492  | 0 | 2 | 0 | 0 | 50 | 58 | 17222924 | 4.43E-01 | 1 |
| ATP5A1   | 388169  | 300  | 67  | 1402640 | 425776 | 0 | 5 | 0 | 0 | 50 | 62 | 22125044 | 4.43E-01 | 1 |
| OGFOD1   | 523951  | 285  | 13  | 1448920 | 344252 | 0 | 3 | 0 | 0 | 14 | 9  | 5932384  | 4.43E-01 | 1 |
| ICOS     | 122253  | 693  | 5   | 531152  | 128872 | 0 | 2 | 0 | 0 | 50 | 61 | 23739504 | 4.43E-01 | 1 |
| CDH15    | 1307930 | 254  | 38  | 2015672 | 653260 | 0 | 7 | 3 | 0 | 50 | 57 | 20720624 | 4.43E-01 | 1 |
| YRDC     | 445096  | 375  | 33  | 681740  | 234604 | 0 | 1 | 1 | 0 | 50 | 50 | 19791820 | 4.43E-01 | 1 |
| POU2F3   | 323392  | 198  | 36  | 1134216 | 319332 | 0 | 2 | 3 | 0 | 27 | 23 | 8094372  | 4.43E-01 | 1 |
| CRYBG3   | 123806  | 723  | 0   | 2673204 | 683520 | 0 | 8 | 2 | 0 | 28 | 19 | 11284132 | 4.43E-01 | 1 |
| XRN2     | 288961  | 638  | -12 | 2547892 | 625136 | 0 | 6 | 1 | 0 | 41 | 32 | 16020356 | 4.43E-01 | 1 |
| CRIPT    | 603816  | 252  | 35  | 284444  | 61588  | 0 | 1 | 0 | 0 | 50 | 45 | 22018244 | 4.44E-01 | 1 |
| FEZF1    | 61242   | 1007 | -15 | 1192244 | 347812 | 0 | 7 | 1 | 0 | 50 | 79 | 22213332 | 4.44E-01 | 1 |
| SLC16A1  | 601487  | 276  | 16  | 1250984 | 371308 | 0 | 3 | 3 | 0 | 8  | 13 | 4602012  | 4.44E-01 | 1 |
| SYT4     | 4302    | 1101 | -41 | 1079748 | 297972 | 0 | 8 | 1 | 0 | 4  | 8  | 1814888  | 4.44E-01 | 1 |
| TRAM1L1  | 24934   | NaN  | -31 | 925956  | 259524 | 0 | 7 | 1 | 0 | 24 | 56 | 11857648 | 4.44E-01 | 1 |

|          |         |      |     |         |         |   |    |   |   |    |    |          |          |   |
|----------|---------|------|-----|---------|---------|---|----|---|---|----|----|----------|----------|---|
| FOXR1    | 1457410 | 180  | 55  | 752584  | 209684  | 0 | 1  | 0 | 0 | 19 | 13 | 6716296  | 4.44E-01 | 1 |
| E2F5     | 99174   | 1450 | 3   | 899968  | 243860  | 0 | 3  | 1 | 0 | 50 | 42 | 21193748 | 4.44E-01 | 1 |
| CA10     | 36963   | 832  | -68 | 868996  | 219296  | 0 | 5  | 0 | 0 | 50 | 80 | 22721344 | 4.44E-01 | 1 |
| COX7A2L  | 251919  | 375  | 16  | 292988  | 86152   | 0 | 1  | 0 | 0 | 50 | 44 | 19285944 | 4.44E-01 | 1 |
| CEP164   | 440623  | 360  | 35  | 3774312 | 1039164 | 0 | 11 | 3 | 0 | 25 | 23 | 8756176  | 4.44E-01 | 1 |
| FUT2     | 1616265 | 190  | 38  | 847636  | 258812  | 0 | 4  | 0 | 0 | 43 | 53 | 17176644 | 4.44E-01 | 1 |
| β6GALNAc | 319154  | 834  | -17 | 858316  | 238520  | 0 | 4  | 0 | 0 | 50 | 60 | 18905736 | 4.44E-01 | 1 |
| ATP1B4   | 484939  | NaN  | 23  | 946960  | 232112  | 0 | 3  | 0 | 0 | 50 | 50 | 16394156 | 4.45E-01 | 1 |
| ADAT1    | 449343  | 354  | 18  | 1298688 | 351372  | 0 | 6  | 2 | 0 | 50 | 60 | 21330452 | 4.45E-01 | 1 |
| BRS3     | 374989  | NaN  | 23  | 993596  | 298684  | 0 | 3  | 0 | 0 | 50 | 47 | 23054916 | 4.45E-01 | 1 |
| KIAA1033 | 237030  | 387  | 34  | 3139920 | 760416  | 0 | 11 | 1 | 0 | 8  | 4  | 2420800  | 4.45E-01 | 1 |
| MAPRE3   | 1222544 | 290  | 33  | 745108  | 184052  | 0 | 3  | 0 | 0 | 50 | 54 | 20146040 | 4.45E-01 | 1 |
| KCTD5    | 1803069 | 200  | 47  | 604844  | 171592  | 0 | 1  | 0 | 0 | 50 | 64 | 19321900 | 4.45E-01 | 1 |
| MRPL34   | 842088  | 211  | 43  | 227128  | 75116   | 0 | 1  | 0 | 0 | 50 | 61 | 21639816 | 4.45E-01 | 1 |
| ZCWPW1   | 1454967 | 172  | 57  | 1712716 | 435032  | 0 | 7  | 0 | 0 | 9  | 5  | 2948392  | 4.45E-01 | 1 |
| SSSCA1   | 3945819 | 202  | 45  | 499112  | 158776  | 0 | 2  | 0 | 0 | 19 | 25 | 9711324  | 4.45E-01 | 1 |
| PSG6     | 282702  | 238  | -37 | 1136708 | 327520  | 0 | 7  | 2 | 0 | 22 | 51 | 10502000 | 4.45E-01 | 1 |
| SPRED2   | 545446  | 346  | 36  | 1090072 | 294056  | 0 | 5  | 0 | 0 | 50 | 64 | 21907884 | 4.45E-01 | 1 |
| KIAA0319 | 417813  | 373  | 19  | 2769324 | 786048  | 0 | 6  | 1 | 0 | 27 | 34 | 12201188 | 4.45E-01 | 1 |
| PAQR4    | 1443513 | 234  | 49  | 652548  | 233892  | 0 | 1  | 2 | 0 | 46 | 45 | 16352504 | 4.45E-01 | 1 |
| SURF6    | 1846659 | 416  | 36  | 901036  | 278036  | 0 | 3  | 2 | 0 | 50 | 51 | 15758696 | 4.45E-01 | 1 |
| YIF1A    | 2133752 | 236  | 53  | 744040  | 229976  | 0 | 2  | 0 | 0 | 50 | 77 | 24481764 | 4.46E-01 | 1 |
| TM6SF1   | 308479  | 635  | 29  | 952656  | 274476  | 0 | 4  | 1 | 0 | 37 | 46 | 17166320 | 4.46E-01 | 1 |
| ZNF501   | 433000  | 541  | 28  | 701320  | 170168  | 0 | 1  | 0 | 0 | 50 | 49 | 17644428 | 4.46E-01 | 1 |
| TAS2R16  | 54952   | 972  | -23 | 733360  | 206480  | 0 | 3  | 2 | 0 | 6  | 11 | 3438248  | 4.46E-01 | 1 |
| TMEM63C  | 549191  | 394  | 47  | 2114996 | 564616  | 0 | 8  | 3 | 0 | 33 | 42 | 15619856 | 4.46E-01 | 1 |
| CARKD    | 504689  | 278  | 33  | 979712  | 313636  | 0 | 3  | 2 | 0 | 49 | 55 | 19089076 | 4.46E-01 | 1 |
| SLC6A17  | 552043  | 400  | 33  | 1843012 | 536492  | 0 | 5  | 1 | 0 | 31 | 30 | 13431524 | 4.46E-01 | 1 |
| SPIN1    | 126591  | 495  | -6  | 683164  | 176576  | 0 | 2  | 2 | 0 | 5  | 7  | 2663592  | 4.46E-01 | 1 |
| HEPN1    | 175852  | 743  | 14  | 222144  | 63012   | 0 | 1  | 0 | 0 | 50 | 63 | 23580016 | 4.46E-01 | 1 |
| SEL1L2   | 116952  | 820  | -29 | 1844792 | 448204  | 0 | 9  | 1 | 0 | 50 | 77 | 20583208 | 4.46E-01 | 1 |
| CEACAM7  | 1249321 | 499  | 27  | 677824  | 193664  | 0 | 3  | 1 | 0 | 50 | 82 | 23862680 | 4.47E-01 | 1 |
| RGMA     | 243187  | 484  | -19 | 1145608 | 357068  | 0 | 5  | 3 | 0 | 31 | 56 | 14244628 | 4.47E-01 | 1 |



|         |         |      |     |         |        |   |    |   |   |    |    |          |          |   |
|---------|---------|------|-----|---------|--------|---|----|---|---|----|----|----------|----------|---|
| FZD10   | 59974   | 465  | -39 | 1439308 | 425420 | 0 | 7  | 1 | 0 | 36 | 50 | 16348944 | 4.47E-01 | 1 |
| SLC8A2  | 797690  | 276  | 38  | 2268432 | 724104 | 0 | 9  | 3 | 0 | 50 | 64 | 22709952 | 4.47E-01 | 1 |
| GTF2H1  | 601817  | 252  | 37  | 1453904 | 364900 | 0 | 4  | 0 | 0 | 50 | 58 | 23220812 | 4.47E-01 | 1 |
| ACAA1   | 302137  | 411  | 32  | 1076900 | 331792 | 0 | 3  | 0 | 0 | 50 | 54 | 20798588 | 4.47E-01 | 1 |
| WDR31   | 408268  | 248  | 31  | 965828  | 251692 | 0 | 4  | 1 | 0 | 50 | 55 | 20490292 | 4.47E-01 | 1 |
| TAF13   | 989913  | 215  | 18  | 336420  | 79032  | 0 | 1  | 1 | 0 | 13 | 20 | 4444660  | 4.47E-01 | 1 |
| CD200R1 | 245141  | 639  | 11  | 952300  | 243860 | 0 | 2  | 0 | 0 | 48 | 57 | 23192332 | 4.47E-01 | 1 |
| ESD     | 272205  | 820  | 63  | 755788  | 185120 | 0 | 3  | 0 | 0 | 50 | 52 | 20497412 | 4.47E-01 | 1 |
| LYZL6   | 703538  | 424  | 31  | 391244  | 98968  | 0 | 3  | 1 | 0 | 2  | 5  | 1582064  | 4.47E-01 | 1 |
| CD53    | 424743  | 764  | 24  | 577432  | 157352 | 0 | 1  | 1 | 0 | 18 | 24 | 8633712  | 4.47E-01 | 1 |
| CD14    | 774470  | 356  | 31  | 887508  | 321468 | 0 | 2  | 0 | 0 | 19 | 25 | 9696372  | 4.47E-01 | 1 |
| SLC46A1 | 1410113 | 190  | 28  | 1119620 | 374512 | 0 | 5  | 2 | 0 | 50 | 55 | 21380292 | 4.47E-01 | 1 |
| DCTPP1  | 2338593 | 142  | 59  | 422928  | 135636 | 0 | 2  | 0 | 0 | 50 | 74 | 22010768 | 4.47E-01 | 1 |
| BAHD1   | 888588  | 192  | 47  | 1895344 | 632612 | 0 | 7  | 2 | 0 | 38 | 56 | 17300888 | 4.48E-01 | 1 |
| LRRIQ3  | 58597   | 1188 | -18 | 1636176 | 394092 | 0 | 6  | 1 | 0 | 50 | 81 | 23402372 | 4.48E-01 | 1 |
| CLEC3A  | 44717   | 1261 | -26 | 510860  | 134212 | 0 | 3  | 0 | 0 | 50 | 82 | 20582140 | 4.48E-01 | 1 |
| AOX1    | 572062  | 160  | 23  | 3496988 | 940552 | 0 | 9  | 2 | 0 | 50 | 54 | 19999012 | 4.48E-01 | 1 |
| PCCB    | 229049  | 484  | 25  | 1448564 | 411892 | 0 | 4  | 2 | 0 | 50 | 38 | 16047412 | 4.48E-01 | 1 |
| ZNF213  | 1626425 | 234  | 44  | 1145608 | 345320 | 0 | 5  | 1 | 0 | 50 | 77 | 22657976 | 4.48E-01 | 1 |
| FRS2    | 540769  | 350  | 7   | 1289076 | 363120 | 0 | 6  | 1 | 0 | 50 | 60 | 22275988 | 4.48E-01 | 1 |
| DNAL1   | 600464  | 191  | 47  | 518336  | 123532 | 0 | 2  | 0 | 0 | 50 | 62 | 20887588 | 4.48E-01 | 1 |
| FGB     | 59883   | 1034 | 20  | 1293348 | 315060 | 0 | 5  | 0 | 0 | 50 | 39 | 19125032 | 4.48E-01 | 1 |
| CARD14  | 674340  | 219  | 22  | 2692784 | 786760 | 0 | 6  | 3 | 0 | 36 | 55 | 18118976 | 4.48E-01 | 1 |
| RBMXL1  | 316278  | 598  | 5   | 951944  | 300820 | 0 | 5  | 1 | 0 | 50 | 59 | 20056684 | 4.48E-01 | 1 |
| FOXF2   | 114944  | 481  | 14  | 1082240 | 347812 | 0 | 2  | 2 | 0 | 50 | 46 | 20334720 | 4.48E-01 | 1 |
| JTB     | 2028800 | 222  | 34  | 385192  | 102884 | 0 | 2  | 0 | 0 | 50 | 66 | 18282736 | 4.48E-01 | 1 |
| UBE2N   | 380369  | 364  | 15  | 395160  | 107868 | 0 | 4  | 1 | 0 | 8  | 12 | 2497340  | 4.48E-01 | 1 |
| FSIP1   | 516737  | 433  | 0   | 1541480 | 370240 | 0 | 4  | 0 | 0 | 50 | 46 | 18845572 | 4.48E-01 | 1 |
| ZNF354A | 395801  | 765  | 5   | 1558924 | 399788 | 0 | 10 | 2 | 0 | 14 | 16 | 5120704  | 4.48E-01 | 1 |
| ANKRD7  | 72287   | 922  | -13 | 674620  | 168032 | 0 | 3  | 0 | 0 | 50 | 73 | 25381732 | 4.48E-01 | 1 |
| FYTTD1  | 517022  | 210  | 47  | 849416  | 235672 | 0 | 3  | 0 | 0 | 50 | 42 | 18318336 | 4.49E-01 | 1 |
| ZFP30   | 484296  | 888  | -51 | 1359208 | 323960 | 0 | 7  | 0 | 0 | 28 | 34 | 9636920  | 4.49E-01 | 1 |
| KIFAP3  | 181109  | 743  | 2   | 2115708 | 506232 | 0 | 10 | 2 | 0 | 12 | 16 | 6171972  | 4.49E-01 | 1 |

|         |         |     |     |         |        |   |   |   |   |    |     |          |          |   |
|---------|---------|-----|-----|---------|--------|---|---|---|---|----|-----|----------|----------|---|
| PSMG2   | 434233  | 206 | 35  | 688148  | 188680 | 0 | 1 | 1 | 0 | 50 | 50  | 20395596 | 4.49E-01 | 1 |
| CCDC97  | 1193025 | 249 | 33  | 868640  | 250624 | 0 | 4 | 0 | 0 | 50 | 52  | 16514128 | 4.49E-01 | 1 |
| PLA1A   | 288657  | 595 | 42  | 1182632 | 326452 | 0 | 4 | 0 | 0 | 50 | 57  | 18639092 | 4.49E-01 | 1 |
| TTK     | 150632  | 841 | -2  | 2295844 | 547172 | 0 | 7 | 0 | 0 | 1  | 0   | 883592   | 4.49E-01 | 1 |
| RFC3    | 84617   | 580 | 33  | 969744  | 252048 | 0 | 1 | 0 | 0 | 50 | 40  | 22011836 | 4.49E-01 | 1 |
| CLEC4A  | 142724  | 300 | 23  | 633324  | 150588 | 0 | 2 | 0 | 0 | 50 | 43  | 20540844 | 4.49E-01 | 1 |
| GDPD1   | 896167  | 379 | 4   | 946604  | 239944 | 0 | 5 | 0 | 0 | 28 | 26  | 8427232  | 4.49E-01 | 1 |
| SEC61A1 | 817705  | 419 | 42  | 1214672 | 360628 | 0 | 4 | 2 | 0 | 50 | 55  | 19414460 | 4.49E-01 | 1 |
| ARSB    | 203299  | 452 | 50  | 1361700 | 412248 | 0 | 5 | 0 | 0 | 7  | 7   | 3158432  | 4.50E-01 | 1 |
| CDC48   | 445023  | 375 | 27  | 739768  | 203276 | 0 | 2 | 2 | 0 | 37 | 40  | 13106496 | 4.50E-01 | 1 |
| RAB22A  | 841935  | 330 | 18  | 515488  | 134924 | 0 | 3 | 1 | 0 | 11 | 11  | 4136364  | 4.50E-01 | 1 |
| NR2F2   | 94682   | 983 | -22 | 1080816 | 311856 | 0 | 4 | 0 | 0 | 41 | 94  | 25592128 | 4.50E-01 | 1 |
| LHFPL3  | 324628  | 895 | 5   | 593452  | 174440 | 0 | 1 | 0 | 0 | 50 | 73  | 22089800 | 4.50E-01 | 1 |
| VDAC1   | 615558  | 269 | 56  | 738344  | 205768 | 0 | 3 | 1 | 0 | 50 | 58  | 21133584 | 4.50E-01 | 1 |
| EPC1    | 511962  | 189 | 15  | 2151664 | 589892 | 0 | 9 | 0 | 0 | 2  | 2   | 1928808  | 4.50E-01 | 1 |
| KCNJ14  | 1418188 | 209 | 41  | 1059100 | 349592 | 0 | 5 | 0 | 0 | 50 | 91  | 32574000 | 4.50E-01 | 1 |
| RAP2C   | 152540  | NaN | 18  | 469208  | 128872 | 0 | 2 | 0 | 0 | 50 | 46  | 15568592 | 4.50E-01 | 1 |
| C4BPB   | 434877  | 155 | 24  | 681384  | 156996 | 0 | 3 | 1 | 0 | 43 | 68  | 22256052 | 4.50E-01 | 1 |
| MORC4   | 177448  | NaN | 31  | 2451060 | 622644 | 0 | 7 | 1 | 0 | 35 | 41  | 15323664 | 4.50E-01 | 1 |
| RAB10   | 591333  | 135 | 44  | 534356  | 131008 | 0 | 2 | 0 | 0 | 50 | 54  | 19203708 | 4.50E-01 | 1 |
| EPYC    | 20238   | 574 | -33 | 831616  | 228908 | 0 | 3 | 0 | 0 | 50 | 96  | 21164912 | 4.51E-01 | 1 |
| UCHL1   | 224086  | 190 | 39  | 596300  | 157708 | 0 | 3 | 1 | 0 | 50 | 60  | 17223280 | 4.51E-01 | 1 |
| EBLN2   | NaN     | NaN | NaN | 687080  | 187612 | 0 | 1 | 0 | 0 | 50 | 116 | 39833196 | 4.51E-01 | 1 |
| SHE     | 1711793 | 337 | 45  | 1242084 | 370596 | 0 | 5 | 3 | 0 | 32 | 37  | 11254228 | 4.51E-01 | 1 |
| CSNK1E  | 1550040 | 181 | 63  | 1072984 | 305804 | 0 | 3 | 2 | 0 | 50 | 58  | 19090856 | 4.51E-01 | 1 |
| C6orf62 | 422850  | 362 | 40  | 603420  | 150588 | 0 | 2 | 0 | 0 | 50 | 54  | 24131104 | 4.51E-01 | 1 |
| NNAT    | 790368  | 549 | 52  | 213600  | 66216  | 0 | 1 | 0 | 0 | 50 | 68  | 24056344 | 4.51E-01 | 1 |
| IMPG1   | 187724  | 674 | -13 | 2078328 | 546816 | 0 | 7 | 1 | 0 | 50 | 77  | 28104064 | 4.51E-01 | 1 |
| RBMS2   | 2807863 | 166 | 57  | 1070136 | 292632 | 0 | 4 | 0 | 0 | 33 | 61  | 19161344 | 4.51E-01 | 1 |
| RRM2    | 805187  | 220 | 47  | 1169816 | 312568 | 0 | 4 | 0 | 0 | 40 | 48  | 16930292 | 4.51E-01 | 1 |
| ATP4B   | 723091  | 370 | 36  | 767536  | 195800 | 0 | 1 | 0 | 0 | 50 | 65  | 24677208 | 4.51E-01 | 1 |
| CAPN6   | 132204  | NaN | 23  | 1670352 | 437880 | 0 | 4 | 2 | 0 | 50 | 35  | 16861584 | 4.52E-01 | 1 |
| MNAT1   | 261238  | 578 | 5   | 822360  | 200784 | 0 | 3 | 0 | 0 | 50 | 65  | 21090864 | 4.52E-01 | 1 |

|         |         |     |     |         |         |   |    |   |   |    |     |          |          |   |
|---------|---------|-----|-----|---------|---------|---|----|---|---|----|-----|----------|----------|---|
| DCAKD   | 831501  | 191 | 28  | 575652  | 180492  | 0 | 3  | 0 | 0 | 50 | 88  | 23819960 | 4.52E-01 | 1 |
| RASD2   | 378214  | 227 | -30 | 676756  | 187256  | 0 | 3  | 1 | 0 | 50 | 90  | 20097268 | 4.52E-01 | 1 |
| GNPAT   | 380550  | 569 | 8   | 1779644 | 466360  | 0 | 6  | 1 | 0 | 50 | 71  | 20460388 | 4.52E-01 | 1 |
| TREH    | 1449531 | 161 | 45  | 1514424 | 417588  | 0 | 3  | 0 | 0 | 35 | 53  | 17505944 | 4.52E-01 | 1 |
| TTC7B   | 367726  | 570 | 20  | 2152020 | 633324  | 0 | 11 | 1 | 0 | 4  | 6   | 2117488  | 4.52E-01 | 1 |
| PRNP    | 556280  | 447 | 11  | 645072  | 177288  | 0 | 1  | 0 | 0 | 8  | 5   | 2916352  | 4.52E-01 | 1 |
| CPNE6   | 992350  | 355 | 19  | 1444292 | 411892  | 0 | 5  | 2 | 0 | 19 | 27  | 8529760  | 4.52E-01 | 1 |
| ARL5B   | 74299   | 539 | -5  | 477396  | 120684  | 0 | 2  | 0 | 0 | 50 | 63  | 22442240 | 4.52E-01 | 1 |
| RNF19A  | 1009773 | 212 | 41  | 2148460 | 578144  | 0 | 11 | 0 | 0 | 9  | 6   | 3113220  | 4.52E-01 | 1 |
| FXYD4   | 388267  | 387 | -2  | 256676  | 61588   | 0 | 1  | 0 | 0 | 50 | 47  | 18985836 | 4.52E-01 | 1 |
| SCN4B   | 707709  | 293 | 56  | 581348  | 169456  | 0 | 1  | 0 | 0 | 50 | 54  | 16045632 | 4.52E-01 | 1 |
| APPL2   | 233879  | 387 | 30  | 1761488 | 454612  | 0 | 6  | 1 | 0 | 27 | 27  | 12632660 | 4.52E-01 | 1 |
| PIP5KL1 | 1278941 | 201 | 51  | 995020  | 311144  | 0 | 1  | 2 | 0 | 30 | 20  | 11368860 | 4.52E-01 | 1 |
| DCAF8L1 | 10501   | NaN | 25  | 1505524 | 420080  | 0 | 8  | 1 | 0 | 32 | 42  | 13430812 | 4.52E-01 | 1 |
| MCTP1   | 148501  | 629 | 22  | 2625144 | 735852  | 0 | 7  | 4 | 0 | 50 | 50  | 22065948 | 4.52E-01 | 1 |
| PAK3    | 109883  | NaN | 18  | 1530444 | 399432  | 0 | 7  | 0 | 0 | 50 | 59  | 19823148 | 4.52E-01 | 1 |
| ZNF805  | NaN     | NaN | NaN | 1609832 | 415096  | 0 | 5  | 0 | 0 | 50 | 116 | 40060680 | 4.52E-01 | 1 |
| CYLC1   | 19326   | NaN | -45 | 1701680 | 408688  | 0 | 7  | 0 | 0 | 11 | 17  | 6558944  | 4.52E-01 | 1 |
| TEX264  | 759916  | 456 | 37  | 778928  | 244216  | 0 | 3  | 1 | 0 | 50 | 51  | 19214744 | 4.53E-01 | 1 |
| ARNT2   | 365740  | 542 | 8   | 1874696 | 502672  | 0 | 8  | 1 | 0 | 50 | 52  | 20350028 | 4.53E-01 | 1 |
| MAN1C1  | 693953  | 443 | 29  | 1609832 | 458884  | 0 | 5  | 1 | 0 | 50 | 54  | 19708160 | 4.53E-01 | 1 |
| FCRL6   | 801453  | 497 | 6   | 1112856 | 321468  | 0 | 5  | 2 | 0 | 50 | 57  | 19094772 | 4.53E-01 | 1 |
| DARS    | 440321  | 410 | 30  | 1339984 | 332504  | 0 | 4  | 2 | 0 | 50 | 62  | 21310160 | 4.53E-01 | 1 |
| SPAG11B | NaN     | NaN | NaN | 908512  | 234248  | 0 | 2  | 0 | 0 | 50 | 116 | 39879832 | 4.53E-01 | 1 |
| ZDHHC11 | 843639  | 408 | 28  | 1079392 | 295124  | 0 | 2  | 1 | 0 | 50 | 66  | 25580380 | 4.53E-01 | 1 |
| GAS2L1  | 849693  | 251 | 36  | 1628700 | 580992  | 0 | 5  | 2 | 0 | 50 | 58  | 21612760 | 4.53E-01 | 1 |
| EXPH5   | 369515  | 500 | 13  | 5029212 | 1368108 | 0 | 20 | 2 | 0 | 15 | 14  | 7006792  | 4.53E-01 | 1 |
| TATDN1  | 456351  | 544 | 44  | 822004  | 186188  | 0 | 2  | 0 | 0 | 50 | 66  | 20641948 | 4.53E-01 | 1 |
| HDGF    | 1649536 | 208 | 53  | 805272  | 209328  | 0 | 2  | 1 | 0 | 50 | 69  | 21716356 | 4.53E-01 | 1 |
| ELMO2   | 543201  | 612 | 48  | 1908872 | 490924  | 0 | 6  | 2 | 0 | 50 | 56  | 20294848 | 4.53E-01 | 1 |
| YY1AP1  | 2262876 | 167 | 29  | 2064088 | 598436  | 0 | 7  | 2 | 0 | 50 | 73  | 25473936 | 4.53E-01 | 1 |
| GOLGA2  | 1813435 | 201 | 46  | 2619092 | 703456  | 0 | 12 | 1 | 0 | 13 | 13  | 4284104  | 4.54E-01 | 1 |
| ATP1A2  | 835734  | 386 | 23  | 2602716 | 762552  | 0 | 9  | 2 | 0 | 50 | 73  | 27174548 | 4.54E-01 | 1 |

|         |         |      |     |         |        |   |    |   |   |    |     |          |          |   |
|---------|---------|------|-----|---------|--------|---|----|---|---|----|-----|----------|----------|---|
| MX2     | 241283  | 506  | 46  | 1865084 | 484516 | 0 | 6  | 3 | 0 | 50 | 49  | 18139624 | 4.54E-01 | 1 |
| TLK1    | 439214  | 379  | 38  | 2070496 | 521540 | 0 | 5  | 2 | 0 | 9  | 7   | 3055904  | 4.54E-01 | 1 |
| ANKRA2  | 403014  | 289  | 42  | 814884  | 221076 | 0 | 2  | 0 | 0 | 50 | 67  | 21722052 | 4.54E-01 | 1 |
| JRKL    | 272651  | 489  | 14  | 1325744 | 356356 | 0 | 7  | 1 | 0 | 50 | 50  | 17174152 | 4.54E-01 | 1 |
| SLC35E4 | 723012  | 330  | 56  | 813816  | 315060 | 0 | 3  | 0 | 0 | 35 | 28  | 11658644 | 4.54E-01 | 1 |
| ZDHHC8  | 503106  | 277  | 64  | 2024928 | 699540 | 0 | 4  | 1 | 0 | 23 | 18  | 8463544  | 4.54E-01 | 1 |
| ZBTB38  | 405071  | 178  | 40  | 3024576 | 809544 | 0 | 9  | 2 | 0 | 50 | 48  | 18839164 | 4.54E-01 | 1 |
| HAUS8   | 945446  | 386  | 30  | 1060880 | 298684 | 0 | 2  | 1 | 0 | 50 | 43  | 19029624 | 4.54E-01 | 1 |
| COMMD6  | 197100  | 362  | 35  | 267712  | 68708  | 0 | 1  | 0 | 0 | 50 | 62  | 21338284 | 4.54E-01 | 1 |
| DBNDD1  | 1056657 | 221  | 35  | 480244  | 143468 | 0 | 2  | 0 | 0 | 50 | 47  | 16394156 | 4.55E-01 | 1 |
| SHBG    | 2069567 | 213  | 34  | 1011040 | 314348 | 0 | 4  | 1 | 0 | 21 | 25  | 6102908  | 4.55E-01 | 1 |
| MIOS    | 213895  | 446  | 16  | 2255260 | 594164 | 0 | 16 | 5 | 0 | 7  | 17  | 4155944  | 4.55E-01 | 1 |
| MYBPC1  | 348152  | 448  | 6   | 3154516 | 797084 | 0 | 12 | 1 | 0 | 29 | 25  | 9759028  | 4.55E-01 | 1 |
| PRR16   | 8721    | 1054 | -19 | 691352  | 220720 | 0 | 4  | 1 | 0 | 50 | 82  | 21782216 | 4.55E-01 | 1 |
| TGDS    | 149137  | 803  | 14  | 945180  | 226416 | 0 | 3  | 0 | 0 | 50 | 48  | 17425844 | 4.55E-01 | 1 |
| SCML1   | 70191   | NaN  | 15  | 855824  | 230332 | 0 | 2  | 0 | 0 | 50 | 70  | 22627360 | 4.55E-01 | 1 |
| CMTM7   | 306655  | 592  | 19  | 445356  | 135636 | 0 | 1  | 0 | 0 | 50 | 38  | 27163868 | 4.55E-01 | 1 |
| BTN3A1  | 384310  | 375  | 47  | 1464940 | 395516 | 0 | 5  | 1 | 0 | 50 | 51  | 17347168 | 4.55E-01 | 1 |
| PRL     | 13319   | 831  | -2  | 584552  | 167320 | 0 | 2  | 0 | 0 | 50 | 54  | 22244660 | 4.55E-01 | 1 |
| GPC5    | 12353   | 1007 | -9  | 1458532 | 407264 | 0 | 17 | 4 | 0 | 1  | 4   | 720544   | 4.55E-01 | 1 |
| TAZ     | 2277674 | NaN  | 40  | 787116  | 194376 | 0 | 5  | 2 | 0 | 11 | 18  | 4530812  | 4.55E-01 | 1 |
| OR5T1   | 10317   | 969  | -43 | 809900  | 237808 | 0 | 6  | 2 | 0 | 8  | 13  | 3063024  | 4.55E-01 | 1 |
| SPANXN2 | 4811    | NaN  | -27 | 466004  | 120328 | 0 | 3  | 0 | 0 | 50 | 131 | 28720656 | 4.55E-01 | 1 |
| ANAPC4  | 233480  | 611  | 44  | 2177652 | 538272 | 0 | 8  | 1 | 0 | 43 | 47  | 15187672 | 4.55E-01 | 1 |
| HPGDS   | 129148  | 311  | 14  | 535068  | 127092 | 0 | 2  | 0 | 0 | 50 | 46  | 17889356 | 4.56E-01 | 1 |
| TREM2   | 227466  | 611  | 41  | 585976  | 173372 | 0 | 3  | 0 | 0 | 50 | 50  | 15425836 | 4.56E-01 | 1 |
| PDIA6   | 691715  | 507  | 50  | 1153440 | 312924 | 0 | 5  | 1 | 0 | 50 | 51  | 19636604 | 4.56E-01 | 1 |
| OXNAD1  | 188483  | 517  | 34  | 808476  | 224280 | 0 | 4  | 1 | 0 | 50 | 62  | 20323684 | 4.56E-01 | 1 |
| MEM184C | 71637   | 343  | 9   | 1141336 | 303668 | 0 | 4  | 0 | 0 | 32 | 34  | 15588172 | 4.56E-01 | 1 |
| RABEPK  | 951081  | 168  | 46  | 958708  | 266288 | 0 | 5  | 0 | 0 | 25 | 28  | 10521936 | 4.56E-01 | 1 |
| CHMP5   | 856503  | 167  | 38  | 592740  | 142044 | 0 | 1  | 0 | 0 | 50 | 62  | 21222584 | 4.56E-01 | 1 |
| RAB12   | 241286  | 451  | 11  | 635460  | 170880 | 0 | 2  | 0 | 0 | 50 | 48  | 21642664 | 4.56E-01 | 1 |
| PRSS16  | 161388  | 645  | 24  | 1281244 | 417944 | 0 | 4  | 2 | 0 | 50 | 40  | 20718132 | 4.56E-01 | 1 |

|          |         |     |     |         |         |   |    |   |   |    |     |          |          |   |
|----------|---------|-----|-----|---------|---------|---|----|---|---|----|-----|----------|----------|---|
| WBP5     | 448080  | NaN | 32  | 285512  | 58384   | 0 | 1  | 0 | 0 | 50 | 52  | 16837020 | 4.56E-01 | 1 |
| PIAS3    | NaN     | NaN | NaN | 1586336 | 486652  | 0 | 5  | 0 | 0 | 50 | 116 | 40132236 | 4.56E-01 | 1 |
| SERPINE1 | 1066804 | 272 | 39  | 1035248 | 289072  | 0 | 4  | 1 | 0 | 50 | 83  | 23088024 | 4.56E-01 | 1 |
| ZBP1     | 181790  | 562 | -4  | 1158424 | 329300  | 0 | 3  | 1 | 0 | 50 | 59  | 19947392 | 4.57E-01 | 1 |
| NMNAT2   | 769970  | 465 | 13  | 877896  | 228552  | 0 | 2  | 1 | 0 | 50 | 45  | 16269556 | 4.57E-01 | 1 |
| ARHGAP1  | 359237  | 346 | 25  | 2233900 | 556784  | 0 | 5  | 1 | 0 | 50 | 42  | 23283112 | 4.57E-01 | 1 |
| CYP26B1  | 72898   | 411 | -5  | 1267360 | 397652  | 0 | 5  | 2 | 0 | 50 | 55  | 20502752 | 4.57E-01 | 1 |
| ART3     | 507519  | 322 | 41  | 1045928 | 250624  | 0 | 5  | 0 | 0 | 50 | 49  | 18868712 | 4.57E-01 | 1 |
| NPM2     | 576057  | 222 | 41  | 581348  | 141688  | 0 | 2  | 0 | 0 | 50 | 38  | 18787544 | 4.57E-01 | 1 |
| TNFSF8   | 241285  | 318 | -9  | 599504  | 166252  | 0 | 2  | 1 | 0 | 50 | 48  | 20055616 | 4.57E-01 | 1 |
| KLHL20   | 440130  | 417 | 5   | 1562128 | 439304  | 0 | 3  | 0 | 0 | 27 | 16  | 9168780  | 4.57E-01 | 1 |
| SEC14L4  | 655714  | 288 | 38  | 1075120 | 282308  | 0 | 4  | 1 | 0 | 50 | 60  | 17814952 | 4.57E-01 | 1 |
| DDX47    | 742991  | 129 | 27  | 1175868 | 334284  | 0 | 3  | 1 | 0 | 50 | 55  | 22305180 | 4.57E-01 | 1 |
| RICTOR   | 193512  | 336 | -2  | 4451068 | 1184768 | 0 | 14 | 2 | 0 | 20 | 19  | 9884696  | 4.57E-01 | 1 |
| LCE2A    | 169158  | 818 | 24  | 271272  | 75828   | 0 | 1  | 0 | 0 | 50 | 53  | 20184132 | 4.57E-01 | 1 |
| SERPINB6 | 446135  | 201 | 44  | 982560  | 250980  | 0 | 4  | 1 | 0 | 50 | 48  | 18310148 | 4.58E-01 | 1 |
| LIF      | 548674  | 211 | 43  | 506232  | 152724  | 0 | 2  | 0 | 0 | 50 | 54  | 19921048 | 4.58E-01 | 1 |
| PTPN2    | 435935  | 152 | 46  | 1113568 | 279104  | 0 | 2  | 1 | 0 | 50 | 37  | 16366032 | 4.58E-01 | 1 |
| RHGAP11  | 220858  | 693 | 10  | 695268  | 189036  | 0 | 3  | 0 | 0 | 50 | 60  | 20067720 | 4.58E-01 | 1 |
| NECAB2   | 494952  | 460 | 3   | 1011040 | 282308  | 0 | 2  | 1 | 0 | 50 | 40  | 17879032 | 4.58E-01 | 1 |
| DSTN     | 568191  | 347 | -5  | 437524  | 107156  | 0 | 1  | 1 | 0 | 50 | 56  | 19901468 | 4.58E-01 | 1 |
| KRT24    | 953708  | 269 | 13  | 1326812 | 390532  | 0 | 5  | 2 | 0 | 50 | 60  | 20121832 | 4.58E-01 | 1 |
| SCPEP1   | 333715  | 254 | -10 | 1188684 | 316128  | 0 | 4  | 2 | 0 | 50 | 46  | 20300900 | 4.58E-01 | 1 |
| CIC      | 790787  | 299 | 37  | 3865804 | 1372736 | 0 | 13 | 5 | 0 | 18 | 15  | 6929540  | 4.58E-01 | 1 |
| UGT2B17  | 107080  | 748 | -5  | 1378076 | 348880  | 0 | 6  | 2 | 0 | 20 | 20  | 8316516  | 4.58E-01 | 1 |
| COL7A1   | 1386275 | 212 | 37  | 7435772 | 2500900 | 0 | 29 | 4 | 0 | 0  | 4   | 2500900  | 4.58E-01 | 1 |
| ZNF251   | 1841573 | 401 | 17  | 1712004 | 458172  | 0 | 8  | 0 | 0 | 3  | 2   | 1449988  | 4.58E-01 | 1 |
| SCG2     | 276568  | 364 | -7  | 1584200 | 400144  | 0 | 10 | 3 | 0 | 7  | 10  | 3298340  | 4.58E-01 | 1 |
| SHMT2    | 2162032 | 238 | 58  | 1275904 | 389108  | 0 | 3  | 1 | 0 | 50 | 84  | 24087316 | 4.58E-01 | 1 |
| MICAL1   | 328699  | 559 | 47  | 2714144 | 810256  | 0 | 8  | 1 | 0 | 34 | 32  | 14602764 | 4.58E-01 | 1 |
| C6orf47  | 2517236 | 193 | 20  | 699184  | 245996  | 0 | 2  | 1 | 0 | 17 | 7   | 4698132  | 4.58E-01 | 1 |
| PPT2     | 2119974 | 392 | 28  | 799220  | 226060  | 0 | 3  | 1 | 0 | 50 | 62  | 23774036 | 4.58E-01 | 1 |
| TCF4     | 92114   | 936 | 12  | 1750808 | 483448  | 0 | 7  | 2 | 0 | 50 | 62  | 21986560 | 4.58E-01 | 1 |

|          |         |      |     |          |         |   |    |    |   |    |     |          |          |   |
|----------|---------|------|-----|----------|---------|---|----|----|---|----|-----|----------|----------|---|
| DNAJB11  | 592490  | 436  | 40  | 939484   | 249200  | 0 | 4  | 1  | 0 | 50 | 85  | 29356116 | 4.58E-01 | 1 |
| RUSC2    | 1081620 | 300  | 28  | 3705960  | 1201500 | 0 | 12 | 0  | 0 | 0  | 0   | 1201500  | 4.59E-01 | 1 |
| LRMP     | 250089  | 700  | 17  | 1336424  | 338200  | 0 | 4  | 0  | 0 | 42 | 47  | 17380276 | 4.59E-01 | 1 |
| CDCA5    | 3267059 | 207  | 46  | 634748   | 197224  | 0 | 4  | 1  | 0 | 50 | 74  | 20482816 | 4.59E-01 | 1 |
| TOX4     | 707390  | 470  | 30  | 1554652  | 473480  | 0 | 5  | 2  | 0 | 31 | 43  | 15582120 | 4.59E-01 | 1 |
| AGPAT1   | 2119974 | 392  | 28  | 712712   | 222856  | 0 | 2  | 2  | 0 | 10 | 13  | 4219668  | 4.59E-01 | 1 |
| SEPP1    | 343552  | 626  | -12 | 1058032  | 283376  | 0 | 2  | 0  | 0 | 50 | 33  | 15396644 | 4.59E-01 | 1 |
| TSNAXIP1 | 1039476 | 143  | 49  | 1735856  | 437524  | 0 | 6  | 0  | 0 | 37 | 34  | 16030680 | 4.59E-01 | 1 |
| TMEM115  | 843769  | 206  | 51  | 836956   | 295124  | 0 | 3  | 1  | 0 | 50 | 68  | 20472848 | 4.59E-01 | 1 |
| C6orf165 | 222811  | 556  | 26  | 1622648  | 424708  | 0 | 4  | 0  | 0 | 19 | 14  | 7121424  | 4.59E-01 | 1 |
| NKAIN3   | 138003  | 904  | -16 | 520116   | 135636  | 0 | 2  | 0  | 0 | 50 | 70  | 23225796 | 4.59E-01 | 1 |
| PSMA1    | 366243  | 381  | -3  | 764688   | 197580  | 0 | 3  | 0  | 0 | 22 | 19  | 8463900  | 4.60E-01 | 1 |
| DBF4     | 202733  | 758  | 14  | 1779288  | 430404  | 0 | 7  | 2  | 0 | 50 | 67  | 22089444 | 4.60E-01 | 1 |
| ATP6AP1L | 146069  | 476  | 1   | 571736   | 166252  | 0 | 2  | 1  | 0 | 7  | 3   | 1387332  | 4.60E-01 | 1 |
| GDA      | 285414  | 207  | 11  | 1200076  | 313280  | 0 | 6  | 3  | 0 | 7  | 11  | 3291932  | 4.60E-01 | 1 |
| MMP19    | 1909014 | 256  | 38  | 1291924  | 373088  | 0 | 4  | 1  | 0 | 50 | 69  | 23288452 | 4.60E-01 | 1 |
| MSRB2    | 126042  | 469  | 5   | 464580   | 138840  | 0 | 3  | 2  | 0 | 8  | 10  | 1363836  | 4.60E-01 | 1 |
| TGIF2LX  | 8315    | NaN  | -35 | 607692   | 174084  | 0 | 5  | 0  | 0 | 50 | 118 | 24111880 | 4.60E-01 | 1 |
| FBC1D10A | 622382  | 211  | 50  | 1291924  | 375224  | 0 | 5  | 0  | 0 | 27 | 25  | 10479216 | 4.60E-01 | 1 |
| CAPZA2   | 503859  | 185  | 8   | 774300   | 184764  | 0 | 2  | 0  | 0 | 50 | 59  | 21138212 | 4.60E-01 | 1 |
| ZNF675   | 451758  | 1464 | -69 | 1487724  | 348168  | 0 | 5  | 0  | 0 | 18 | 36  | 8523352  | 4.60E-01 | 1 |
| CCM2     | 1090292 | 235  | 55  | 1224996  | 342828  | 0 | 5  | 2  | 0 | 22 | 47  | 12176980 | 4.60E-01 | 1 |
| UTP18    | 758183  | 431  | -15 | 1453548  | 388752  | 0 | 5  | 2  | 0 | 50 | 68  | 21197308 | 4.60E-01 | 1 |
| NTN1     | 128482  | 632  | -7  | 1532580  | 431472  | 0 | 5  | 0  | 0 | 50 | 54  | 26562584 | 4.60E-01 | 1 |
| NOP58    | 386034  | 270  | 50  | 1409404  | 348524  | 0 | 4  | 0  | 0 | 50 | 50  | 19608836 | 4.60E-01 | 1 |
| FAT4     | 15815   | 726  | -10 | 12366372 | 3664308 | 0 | 63 | 18 | 0 | 3  | 22  | 5345340  | 4.60E-01 | 1 |
| HIC2     | NaN     | NaN  | NaN | 1517628  | 464580  | 0 | 5  | 2  | 0 | 50 | 118 | 40110164 | 4.60E-01 | 1 |
| SOX7     | 110362  | 481  | 9   | 944468   | 308296  | 0 | 4  | 1  | 0 | 50 | 59  | 22403080 | 4.60E-01 | 1 |
| MARCO    | 152902  | 553  | -2  | 1354936  | 382700  | 0 | 5  | 2  | 0 | 16 | 18  | 6387352  | 4.61E-01 | 1 |
| TGIF1    | 444864  | 153  | 17  | 1034892  | 344964  | 0 | 4  | 1  | 0 | 50 | 55  | 24721708 | 4.61E-01 | 1 |
| GMPS     | 345838  | 388  | 4   | 1800292  | 489500  | 0 | 4  | 2  | 0 | 50 | 64  | 22200160 | 4.61E-01 | 1 |
| NCF4     | 1261877 | 537  | 50  | 1082952  | 302244  | 0 | 3  | 1  | 0 | 23 | 31  | 11720588 | 4.61E-01 | 1 |
| HPCAL1   | 732179  | 270  | 44  | 507300   | 127092  | 0 | 2  | 1  | 0 | 50 | 56  | 21004712 | 4.61E-01 | 1 |

|         |         |      |     |         |         |   |    |   |   |    |     |          |          |   |
|---------|---------|------|-----|---------|---------|---|----|---|---|----|-----|----------|----------|---|
| PLA2G7  | 141205  | 551  | -1  | 1171596 | 291564  | 0 | 5  | 1 | 0 | 50 | 52  | 20657968 | 4.61E-01 | 1 |
| GPR132  | 857767  | 198  | 43  | 928804  | 296192  | 0 | 4  | 0 | 0 | 50 | 58  | 20111152 | 4.61E-01 | 1 |
| SEC13   | 742508  | 333  | 57  | 851552  | 219652  | 0 | 2  | 2 | 0 | 17 | 14  | 6689240  | 4.61E-01 | 1 |
| PTPN7   | 649164  | 297  | 34  | 1016024 | 299752  | 0 | 1  | 0 | 0 | 33 | 33  | 17024988 | 4.61E-01 | 1 |
| DNAJC12 | 286530  | 441  | -5  | 548952  | 132432  | 0 | 2  | 0 | 0 | 50 | 56  | 21624864 | 4.61E-01 | 1 |
| GRHL3   | 893155  | 198  | 22  | 1608408 | 426132  | 0 | 5  | 2 | 0 | 50 | 51  | 16219716 | 4.61E-01 | 1 |
| GPR52   | NaN     | NaN  | NaN | 901392  | 260592  | 0 | 2  | 1 | 0 | 50 | 117 | 39906176 | 4.61E-01 | 1 |
| VPS33B  | 753718  | 413  | 31  | 1650416 | 423640  | 0 | 4  | 1 | 0 | 42 | 60  | 20298408 | 4.61E-01 | 1 |
| LRRC59  | 1335838 | 196  | 24  | 781420  | 231044  | 0 | 2  | 1 | 0 | 50 | 70  | 22959864 | 4.61E-01 | 1 |
| RPL22L1 | 211469  | 610  | 16  | 331792  | 77252   | 0 | 2  | 0 | 0 | 14 | 16  | 4137788  | 4.61E-01 | 1 |
| ACOX2   | 551037  | 265  | 33  | 1751876 | 495196  | 0 | 9  | 2 | 0 | 19 | 31  | 7602736  | 4.61E-01 | 1 |
| RHAG    | 66931   | 1248 | -6  | 1058744 | 295480  | 0 | 2  | 0 | 0 | 50 | 43  | 17490992 | 4.61E-01 | 1 |
| PAPPA2  | 39980   | 863  | -10 | 4592044 | 1293704 | 0 | 20 | 7 | 0 | 9  | 15  | 4863672  | 4.61E-01 | 1 |
| OR52I1  | 212267  | 935  | -3  | 794592  | 245640  | 0 | 3  | 2 | 0 | 30 | 45  | 12142448 | 4.61E-01 | 1 |
| ATCAY   | 2187414 | 201  | 34  | 983984  | 259168  | 0 | 2  | 0 | 0 | 40 | 53  | 20047072 | 4.61E-01 | 1 |
| RBM24   | 249340  | 560  | -6  | 614812  | 194732  | 0 | 1  | 0 | 0 | 50 | 63  | 20553304 | 4.61E-01 | 1 |
| SYNJ2BP | 499052  | 591  | 37  | 374156  | 106444  | 0 | 2  | 0 | 0 | 50 | 72  | 22615968 | 4.61E-01 | 1 |
| OR51B2  | 100115  | 1056 | 1   | 776792  | 230332  | 0 | 3  | 1 | 0 | 30 | 18  | 7873652  | 4.62E-01 | 1 |
| RPL35A  | 612221  | 410  | 33  | 293344  | 81524   | 0 | 1  | 0 | 0 | 50 | 48  | 19887940 | 4.62E-01 | 1 |
| NUDT13  | 539834  | 354  | 40  | 916344  | 248844  | 0 | 2  | 1 | 0 | 50 | 53  | 18779000 | 4.62E-01 | 1 |
| CTBS    | 245445  | 585  | -1  | 1001072 | 263440  | 0 | 3  | 0 | 0 | 50 | 48  | 16615588 | 4.62E-01 | 1 |
| KCTD20  | 994811  | 148  | 35  | 1092564 | 283020  | 0 | 4  | 1 | 0 | 50 | 78  | 24184860 | 4.62E-01 | 1 |
| POLG2   | 1306314 | 184  | 23  | 1247068 | 344252  | 0 | 6  | 0 | 0 | 50 | 75  | 23771544 | 4.62E-01 | 1 |
| GPR89A  | NaN     | NaN  | NaN | 1208620 | 312212  | 0 | 5  | 1 | 0 | 50 | 117 | 39957796 | 4.62E-01 | 1 |
| BTG4    | 383632  | 485  | 15  | 596300  | 142756  | 0 | 2  | 0 | 0 | 50 | 61  | 25250368 | 4.62E-01 | 1 |
| ABCD2   | 70113   | 596  | -16 | 1888936 | 523676  | 0 | 7  | 1 | 0 | 50 | 60  | 22563636 | 4.63E-01 | 1 |
| LRRC1   | 256818  | 437  | 30  | 1354580 | 383056  | 0 | 4  | 1 | 0 | 50 | 58  | 22682184 | 4.63E-01 | 1 |
| PI3     | 842540  | 324  | 25  | 300464  | 87220   | 0 | 1  | 0 | 0 | 50 | 49  | 22812836 | 4.63E-01 | 1 |
| CSH2    | 1446139 | 380  | 27  | 595588  | 169100  | 0 | 1  | 1 | 0 | 50 | 63  | 18745892 | 4.63E-01 | 1 |
| EIF2B2  | 875817  | 222  | 53  | 902816  | 257032  | 0 | 4  | 2 | 0 | 50 | 56  | 18192668 | 4.63E-01 | 1 |
| MTCH2   | 989876  | 214  | 28  | 806696  | 218584  | 0 | 3  | 2 | 0 | 14 | 9   | 4489160  | 4.63E-01 | 1 |
| PGF     | 875817  | 222  | 53  | 446068  | 127448  | 0 | 2  | 0 | 0 | 50 | 56  | 18192668 | 4.63E-01 | 1 |
| RUFY3   | 262894  | 589  | 25  | 2002500 | 526524  | 0 | 6  | 2 | 0 | 50 | 56  | 24274572 | 4.63E-01 | 1 |

|          |         |      |     |         |         |   |   |   |   |    |     |          |          |   |
|----------|---------|------|-----|---------|---------|---|---|---|---|----|-----|----------|----------|---|
| PSMD5    | 645542  | 212  | 30  | 1284092 | 374512  | 0 | 3 | 0 | 0 | 6  | 3   | 2392676  | 4.63E-01 | 1 |
| EID1     | NaN     | NaN  | NaN | 479176  | 125312  | 0 | 2 | 0 | 0 | 50 | 116 | 39770896 | 4.63E-01 | 1 |
| MMP10    | 510838  | 567  | -16 | 1249204 | 319688  | 0 | 7 | 2 | 0 | 50 | 58  | 18555432 | 4.63E-01 | 1 |
| SCCPDH   | 439136  | 282  | 3   | 1112500 | 312212  | 0 | 3 | 1 | 0 | 50 | 62  | 24415548 | 4.63E-01 | 1 |
| ZBTB26   | 407115  | 430  | 26  | 1134216 | 286224  | 0 | 2 | 0 | 0 | 26 | 23  | 10651520 | 4.63E-01 | 1 |
| ART1     | 537999  | 403  | 23  | 816664  | 251336  | 0 | 3 | 2 | 0 | 6  | 7   | 3702756  | 4.63E-01 | 1 |
| TAAR6    | 178165  | 618  | 22  | 856892  | 249556  | 0 | 3 | 2 | 0 | 40 | 38  | 16712776 | 4.64E-01 | 1 |
| GSX2     | 77093   | 472  | 20  | 742260  | 241368  | 0 | 2 | 2 | 0 | 8  | 10  | 3561424  | 4.64E-01 | 1 |
| VPS37C   | 914160  | 531  | 42  | 868640  | 289072  | 0 | 3 | 0 | 0 | 50 | 61  | 25159232 | 4.64E-01 | 1 |
| SGSM3    | 469297  | 355  | 56  | 1931656 | 556784  | 0 | 5 | 2 | 0 | 50 | 56  | 19318696 | 4.64E-01 | 1 |
| PTPRU    | 365922  | 395  | 24  | 3713436 | 1074408 | 0 | 8 | 2 | 0 | 50 | 34  | 19843796 | 4.64E-01 | 1 |
| TOLLIP   | 1373249 | 311  | 46  | 701320  | 201140  | 0 | 3 | 0 | 0 | 50 | 84  | 29587872 | 4.64E-01 | 1 |
| TIGD5    | 2183482 | 235  | 37  | 1521544 | 538628  | 0 | 5 | 1 | 0 | 50 | 40  | 19636960 | 4.65E-01 | 1 |
| SLCO4C1  | 36388   | 870  | -5  | 1851200 | 522964  | 0 | 6 | 1 | 0 | 50 | 62  | 21494924 | 4.65E-01 | 1 |
| TTC1     | 199079  | 458  | 31  | 789964  | 178712  | 0 | 2 | 0 | 0 | 50 | 74  | 25793624 | 4.65E-01 | 1 |
| PROKR2   | 504598  | 489  | 14  | 958352  | 278392  | 0 | 5 | 2 | 0 | 25 | 33  | 10440412 | 4.65E-01 | 1 |
| GRM3     | 123690  | 1072 | -18 | 2211828 | 624780  | 0 | 7 | 4 | 0 | 18 | 22  | 10262768 | 4.65E-01 | 1 |
| HSD17B8  | 1474628 | 377  | 24  | 666788  | 208972  | 0 | 4 | 1 | 0 | 50 | 90  | 23548688 | 4.65E-01 | 1 |
| NEK5     | 407938  | 432  | 42  | 1904956 | 452120  | 0 | 8 | 3 | 0 | 15 | 18  | 7055920  | 4.65E-01 | 1 |
| GDF2     | NaN     | NaN  | NaN | 1066932 | 315060  | 0 | 6 | 3 | 0 | 26 | 43  | 11892180 | 4.65E-01 | 1 |
| CD5      | 805103  | 546  | 37  | 1273768 | 359204  | 0 | 3 | 2 | 0 | 50 | 44  | 18355004 | 4.65E-01 | 1 |
| LIN37    | 1151198 | 321  | 30  | 655396  | 174440  | 0 | 1 | 0 | 0 | 50 | 47  | 19100468 | 4.65E-01 | 1 |
| PSD3     | 129089  | 682  | -9  | 2723400 | 735852  | 0 | 9 | 2 | 0 | 50 | 72  | 29578972 | 4.65E-01 | 1 |
| NT5DC1   | 260580  | 640  | 19  | 1208264 | 301888  | 0 | 3 | 0 | 0 | 28 | 21  | 9338948  | 4.65E-01 | 1 |
| GAPDH    | 2764720 | 179  | 42  | 865080  | 245640  | 0 | 4 | 2 | 0 | 32 | 46  | 13936332 | 4.65E-01 | 1 |
| HIST1H3F | 390169  | 544  | 57  | 332860  | 110360  | 0 | 2 | 1 | 0 | 50 | 61  | 13862640 | 4.66E-01 | 1 |
| TBPL1    | 102500  | 359  | 6   | 493416  | 131364  | 0 | 2 | 0 | 0 | 50 | 53  | 18464296 | 4.66E-01 | 1 |
| TBC1D14  | 474439  | 259  | 58  | 1795664 | 488788  | 0 | 4 | 1 | 0 | 38 | 37  | 13832736 | 4.66E-01 | 1 |
| ADAMTS1  | 686411  | 396  | 0   | 2336072 | 740836  | 0 | 9 | 2 | 0 | 50 | 42  | 18408760 | 4.66E-01 | 1 |
| MEM126A  | 325720  | 554  | -19 | 504452  | 142756  | 0 | 1 | 0 | 0 | 50 | 100 | 24725980 | 4.66E-01 | 1 |
| ZBTB32   | 1151198 | 321  | 30  | 1199364 | 381276  | 0 | 7 | 2 | 0 | 4  | 6   | 2126744  | 4.66E-01 | 1 |
| CPA1     | 419615  | 298  | 27  | 1088292 | 300108  | 0 | 4 | 1 | 0 | 19 | 12  | 6105756  | 4.66E-01 | 1 |
| ALDH1L2  | 244603  | 334  | 33  | 2402288 | 652192  | 0 | 6 | 2 | 0 | 50 | 50  | 18695696 | 4.66E-01 | 1 |



|          |         |      |     |         |         |   |    |   |   |    |    |          |          |   |
|----------|---------|------|-----|---------|---------|---|----|---|---|----|----|----------|----------|---|
| C21orf59 | 265057  | 182  | 52  | 769672  | 190460  | 0 | 4  | 2 | 0 | 15 | 15 | 6084752  | 4.66E-01 | 1 |
| C20orf27 | 860065  | 241  | 43  | 513708  | 148452  | 0 | 3  | 1 | 0 | 16 | 30 | 7457844  | 4.66E-01 | 1 |
| BPI      | 562486  | 350  | 45  | 1278040 | 347456  | 0 | 4  | 2 | 0 | 11 | 11 | 3477052  | 4.66E-01 | 1 |
| CUTA     | 1441897 | 236  | 31  | 535780  | 175508  | 0 | 3  | 1 | 0 | 50 | 72 | 19862664 | 4.67E-01 | 1 |
| ZNF337   | 482230  | 636  | -21 | 1928096 | 498400  | 0 | 5  | 4 | 0 | 26 | 20 | 8832716  | 4.67E-01 | 1 |
| FAM71F1  | 875359  | 304  | 30  | 885372  | 247776  | 0 | 3  | 1 | 0 | 38 | 44 | 13792864 | 4.67E-01 | 1 |
| GLTP     | 876814  | 323  | 39  | 542188  | 147740  | 0 | 6  | 3 | 0 | 2  | 4  | 575296   | 4.67E-01 | 1 |
| SHD      | 2132502 | 244  | 39  | 867572  | 248488  | 0 | 3  | 1 | 0 | 50 | 48 | 20510584 | 4.67E-01 | 1 |
| KPNA4    | 444964  | 408  | 21  | 1386620 | 354220  | 0 | 4  | 1 | 0 | 50 | 54 | 23186992 | 4.67E-01 | 1 |
| HGD      | 312906  | 391  | 5   | 1184768 | 299752  | 0 | 4  | 1 | 0 | 50 | 65 | 21094780 | 4.67E-01 | 1 |
| LRP12    | 36110   | 1085 | 15  | 2183704 | 597368  | 0 | 11 | 2 | 0 | 25 | 27 | 10353904 | 4.67E-01 | 1 |
| SGK2     | 345777  | 303  | 4   | 1106092 | 312212  | 0 | 4  | 2 | 0 | 50 | 52 | 21278120 | 4.67E-01 | 1 |
| THBS1    | 467443  | 433  | -5  | 3053768 | 787828  | 0 | 9  | 3 | 0 | 50 | 57 | 19876192 | 4.67E-01 | 1 |
| TSPAN16  | 1385739 | 197  | 31  | 625492  | 188324  | 0 | 2  | 0 | 0 | 50 | 60 | 22230420 | 4.67E-01 | 1 |
| USP24    | 447636  | 230  | 9   | 6869020 | 1814888 | 0 | 15 | 1 | 0 | 1  | 1  | 2116776  | 4.67E-01 | 1 |
| EGLN2    | 1187304 | 275  | 31  | 1002852 | 321468  | 0 | 4  | 1 | 0 | 50 | 50 | 17463580 | 4.67E-01 | 1 |
| CDS1     | 94589   | 895  | 5   | 1213604 | 317908  | 0 | 5  | 0 | 0 | 50 | 51 | 18783628 | 4.68E-01 | 1 |
| BBS9     | 233203  | 759  | -6  | 2319696 | 619440  | 0 | 11 | 3 | 0 | 2  | 4  | 1726244  | 4.68E-01 | 1 |
| DNAJC30  | 1197825 | 214  | 52  | 543968  | 185476  | 0 | 2  | 1 | 0 | 7  | 5  | 2787836  | 4.68E-01 | 1 |
| OR6K3    | 175690  | 966  | 2   | 784624  | 225704  | 0 | 6  | 2 | 0 | 7  | 11 | 2797804  | 4.68E-01 | 1 |
| DEDD     | NaN     | NaN  | NaN | 804560  | 234604  | 0 | 5  | 2 | 0 | 26 | 42 | 11811724 | 4.68E-01 | 1 |
| ABI2     | 415048  | 298  | 23  | 1216808 | 346744  | 0 | 6  | 0 | 0 | 20 | 26 | 9373836  | 4.68E-01 | 1 |
| ZNF630   | 582390  | NaN  | 18  | 1703460 | 417588  | 0 | 4  | 0 | 0 | 24 | 23 | 10930624 | 4.68E-01 | 1 |
| B9D2     | 1193025 | 249  | 33  | 446068  | 130652  | 0 | 2  | 0 | 0 | 50 | 52 | 16514128 | 4.68E-01 | 1 |
| TFE3     | 834140  | NaN  | 41  | 1419372 | 464580  | 0 | 5  | 2 | 0 | 14 | 22 | 6888244  | 4.68E-01 | 1 |
| SFTA2    | 2223866 | 223  | 25  | 202208  | 61588   | 0 | 1  | 0 | 0 | 50 | 73 | 23168480 | 4.68E-01 | 1 |
| BCHE     | 28918   | 1215 | -18 | 1541836 | 402992  | 0 | 7  | 3 | 0 | 18 | 27 | 6534024  | 4.68E-01 | 1 |
| 3GALNAC  | 450604  | 563  | -9  | 1404420 | 360984  | 0 | 6  | 1 | 0 | 31 | 27 | 9204024  | 4.69E-01 | 1 |
| WDR83    | 1975767 | 409  | 1   | 814528  | 240656  | 0 | 3  | 1 | 0 | 50 | 74 | 27829232 | 4.69E-01 | 1 |
| NLGN1    | 34593   | 1079 | -18 | 2071564 | 585620  | 0 | 9  | 1 | 0 | 23 | 24 | 9141724  | 4.69E-01 | 1 |
| AGGF1    | 261159  | 333  | 30  | 1875052 | 471344  | 0 | 6  | 3 | 0 | 50 | 47 | 17142468 | 4.69E-01 | 1 |
| ATP6V0B  | 875223  | 214  | 39  | 531864  | 158064  | 0 | 2  | 1 | 0 | 50 | 67 | 19898264 | 4.69E-01 | 1 |
| RHOT1    | 675374  | 312  | 21  | 1846572 | 456036  | 0 | 5  | 1 | 0 | 50 | 57 | 25651936 | 4.69E-01 | 1 |

|           |         |      |     |         |         |   |    |   |   |    |    |          |          |   |
|-----------|---------|------|-----|---------|---------|---|----|---|---|----|----|----------|----------|---|
| SHOC2     | 313830  | 252  | 16  | 1488080 | 409756  | 0 | 4  | 1 | 0 | 50 | 51 | 20971960 | 4.69E-01 | 1 |
| SPRY1     | 98850   | 613  | 21  | 805628  | 223924  | 0 | 1  | 0 | 0 | 50 | 55 | 21478904 | 4.69E-01 | 1 |
| HLA-DRA   | 1070559 | 595  | 14  | 651124  | 185120  | 0 | 3  | 0 | 0 | 50 | 75 | 22719564 | 4.69E-01 | 1 |
| UGT8      | 32108   | 966  | 2   | 1372024 | 385904  | 0 | 6  | 1 | 0 | 50 | 63 | 23229712 | 4.69E-01 | 1 |
| CA3       | 100997  | 1460 | -18 | 682096  | 181916  | 0 | 2  | 0 | 0 | 50 | 50 | 20070212 | 4.70E-01 | 1 |
| C15orf26  | 266324  | 650  | 22  | 786048  | 209328  | 0 | 2  | 0 | 0 | 28 | 16 | 9927416  | 4.70E-01 | 1 |
| ANKS1A    | 664697  | 304  | 26  | 2892144 | 842652  | 0 | 9  | 2 | 0 | 13 | 17 | 8161656  | 4.70E-01 | 1 |
| WNT5A     | 28683   | 425  | 20  | 974016  | 263796  | 0 | 2  | 0 | 0 | 50 | 53 | 20067720 | 4.70E-01 | 1 |
| MARS2     | 642112  | 684  | 32  | 1440376 | 464936  | 0 | 3  | 0 | 0 | 50 | 30 | 19571812 | 4.70E-01 | 1 |
| HOXA5     | 356045  | 385  | 28  | 682808  | 191884  | 0 | 2  | 0 | 0 | 50 | 46 | 22711376 | 4.70E-01 | 1 |
| SV2B      | 457413  | 624  | 1   | 1778220 | 460308  | 0 | 6  | 1 | 0 | 45 | 54 | 18672556 | 4.70E-01 | 1 |
| NKIRAS2   | 2081077 | 206  | 23  | 521540  | 110716  | 0 | 4  | 1 | 0 | 32 | 62 | 12704216 | 4.70E-01 | 1 |
| DLX2      | 534370  | 295  | 34  | 811324  | 251336  | 0 | 3  | 0 | 0 | 50 | 51 | 21776876 | 4.70E-01 | 1 |
| MCOLN3    | 425053  | 623  | 4   | 1469924 | 356356  | 0 | 6  | 2 | 0 | 50 | 63 | 19835252 | 4.70E-01 | 1 |
| CNGB1     | 822498  | 125  | 10  | 3278404 | 899612  | 0 | 9  | 1 | 0 | 16 | 14 | 6688528  | 4.70E-01 | 1 |
| SDCCAG8   | 182671  | 1011 | 0   | 1930944 | 448560  | 0 | 6  | 1 | 0 | 46 | 45 | 17800000 | 4.70E-01 | 1 |
| ZFAND6    | 188862  | 557  | 38  | 551800  | 139196  | 0 | 2  | 0 | 0 | 50 | 48 | 17953436 | 4.70E-01 | 1 |
| CETN1     | 483873  | 521  | 28  | 442864  | 113564  | 0 | 2  | 1 | 0 | 45 | 52 | 16547592 | 4.71E-01 | 1 |
| JSRP1     | 1603571 | 240  | 27  | 825564  | 265932  | 0 | 4  | 1 | 0 | 50 | 66 | 21932448 | 4.71E-01 | 1 |
| C20orf194 | 1015129 | 338  | 40  | 3127816 | 802424  | 0 | 11 | 1 | 0 | 19 | 33 | 8562868  | 4.71E-01 | 1 |
| B4GALT3   | 728669  | 234  | 37  | 969032  | 318976  | 0 | 2  | 1 | 0 | 39 | 44 | 15898604 | 4.71E-01 | 1 |
| ARHGAP3   | 195815  | 546  | -11 | 5262392 | 1517272 | 0 | 17 | 8 | 0 | 24 | 35 | 11870820 | 4.71E-01 | 1 |
| TMEM219   | 1994393 | 238  | 52  | 598080  | 198648  | 0 | 1  | 0 | 0 | 50 | 61 | 20191252 | 4.71E-01 | 1 |
| MYOZ2     | 241167  | 683  | 1   | 690284  | 180136  | 0 | 3  | 0 | 0 | 50 | 62 | 21470716 | 4.71E-01 | 1 |
| BHMT2     | 236664  | 526  | 38  | 945892  | 252404  | 0 | 5  | 0 | 0 | 50 | 56 | 18448988 | 4.71E-01 | 1 |
| DNALI1    | 445473  | 274  | 30  | 720900  | 202920  | 0 | 1  | 0 | 0 | 50 | 61 | 20995456 | 4.71E-01 | 1 |
| CCDC151   | 1255985 | 265  | 32  | 1534716 | 426132  | 0 | 8  | 3 | 0 | 50 | 60 | 18512000 | 4.71E-01 | 1 |
| ITGA6     | 381919  | 371  | 23  | 2935576 | 787472  | 0 | 7  | 2 | 0 | 50 | 37 | 21159572 | 4.71E-01 | 1 |
| SHMT1     | 957114  | 254  | 9   | 1242084 | 355644  | 0 | 4  | 1 | 0 | 50 | 59 | 18638380 | 4.72E-01 | 1 |
| CHCHD3    | 595524  | 677  | 11  | 606268  | 154148  | 0 | 1  | 0 | 0 | 50 | 68 | 21687520 | 4.72E-01 | 1 |
| TNS1      | 500812  | 399  | 23  | 4349964 | 1331796 | 0 | 16 | 1 | 0 | 1  | 1  | 1563908  | 4.72E-01 | 1 |
| CXorf38   | 467563  | NaN  | 63  | 829480  | 222500  | 0 | 3  | 1 | 0 | 50 | 48 | 18696052 | 4.72E-01 | 1 |
| ELK4      | 721075  | 230  | 34  | 1188684 | 357780  | 0 | 5  | 0 | 0 | 11 | 17 | 5616968  | 4.72E-01 | 1 |

|          |         |      |     |         |         |   |    |   |   |    |    |          |          |   |
|----------|---------|------|-----|---------|---------|---|----|---|---|----|----|----------|----------|---|
| C1orf198 | 446793  | 592  | 12  | 821648  | 244216  | 0 | 4  | 0 | 0 | 50 | 74 | 21733444 | 4.72E-01 | 1 |
| F2RL1    | 248362  | 418  | 25  | 976508  | 302956  | 0 | 4  | 0 | 0 | 16 | 12 | 5006784  | 4.72E-01 | 1 |
| FASTKD3  | 65781   | 1013 | -18 | 1680676 | 464936  | 0 | 10 | 1 | 0 | 23 | 39 | 11558608 | 4.72E-01 | 1 |
| CYP2C9   | 278564  | 721  | -15 | 1273768 | 335708  | 0 | 4  | 1 | 0 | 50 | 56 | 17374580 | 4.72E-01 | 1 |
| GPBP1    | 177326  | 375  | 19  | 1271988 | 316128  | 0 | 4  | 0 | 0 | 48 | 53 | 19258176 | 4.72E-01 | 1 |
| THEM5    | 966708  | 212  | 36  | 640444  | 175508  | 0 | 3  | 0 | 0 | 50 | 62 | 18268140 | 4.72E-01 | 1 |
| WDR73    | 341520  | 263  | 32  | 964048  | 282308  | 0 | 3  | 2 | 0 | 30 | 36 | 12417280 | 4.73E-01 | 1 |
| OVGP1    | 397926  | 461  | 18  | 1715208 | 505164  | 0 | 5  | 2 | 0 | 50 | 56 | 21248572 | 4.73E-01 | 1 |
| TTLL4    | 1055730 | 269  | 42  | 3058396 | 863300  | 0 | 8  | 3 | 0 | 50 | 76 | 23587492 | 4.73E-01 | 1 |
| ANXA5    | 311234  | 440  | 9   | 851908  | 227840  | 0 | 3  | 1 | 0 | 50 | 48 | 19987620 | 4.73E-01 | 1 |
| MS4A10   | 744779  | 621  | 23  | 690996  | 197580  | 0 | 3  | 0 | 0 | 50 | 74 | 23297708 | 4.73E-01 | 1 |
| AFAP1L2  | 303560  | 299  | 6   | 2118912 | 582060  | 0 | 7  | 0 | 0 | 4  | 2  | 2405492  | 4.73E-01 | 1 |
| LDB3     | 352918  | 192  | 27  | 2102536 | 642224  | 0 | 4  | 0 | 0 | 16 | 16 | 10528344 | 4.73E-01 | 1 |
| SPDYC    | 3317462 | 168  | 54  | 756144  | 210396  | 0 | 3  | 1 | 0 | 50 | 56 | 19574304 | 4.73E-01 | 1 |
| NANOS3   | 754888  | 241  | 31  | 466004  | 156640  | 0 | 2  | 1 | 0 | 50 | 63 | 19916776 | 4.73E-01 | 1 |
| GRIN2A   | 109137  | 922  | -9  | 3745476 | 999648  | 0 | 11 | 5 | 0 | 50 | 67 | 24296288 | 4.73E-01 | 1 |
| C11orf53 | 209532  | 617  | 16  | 587400  | 184764  | 0 | 4  | 2 | 0 | 12 | 11 | 2900332  | 4.73E-01 | 1 |
| SEMA3D   | 17511   | 646  | -28 | 2048780 | 514420  | 0 | 17 | 5 | 0 | 7  | 16 | 2096128  | 4.74E-01 | 1 |
| PLSCR2   | 122649  | 611  | -16 | 598436  | 148096  | 0 | 3  | 1 | 0 | 10 | 9  | 3129952  | 4.74E-01 | 1 |
| PRSS21   | 1717244 | 210  | 42  | 799220  | 231400  | 0 | 2  | 1 | 0 | 50 | 80 | 24105472 | 4.74E-01 | 1 |
| FAR1     | 171781  | 639  | -7  | 1348884 | 351372  | 0 | 4  | 1 | 0 | 50 | 49 | 25572192 | 4.74E-01 | 1 |
| INTS8    | 430887  | 389  | 38  | 2627280 | 674976  | 0 | 9  | 1 | 0 | 9  | 14 | 4459968  | 4.74E-01 | 1 |
| DAP      | 630950  | 435  | 29  | 272696  | 70132   | 0 | 1  | 0 | 0 | 50 | 51 | 20828136 | 4.74E-01 | 1 |
| COG6     | 73269   | 761  | 11  | 1741908 | 470988  | 0 | 3  | 0 | 0 | 50 | 60 | 23132168 | 4.74E-01 | 1 |
| C5orf46  | 137041  | 470  | 2   | 235316  | 61588   | 0 | 1  | 1 | 0 | 4  | 2  | 691708   | 4.74E-01 | 1 |
| GNAI3    | 1022796 | 187  | 33  | 939484  | 232112  | 0 | 5  | 1 | 0 | 50 | 62 | 17876540 | 4.74E-01 | 1 |
| ZNF563   | 1744621 | 671  | -8  | 1249560 | 291564  | 0 | 5  | 1 | 0 | 50 | 86 | 23980872 | 4.74E-01 | 1 |
| PAAF1    | 544325  | 159  | 44  | 1023500 | 284800  | 0 | 5  | 2 | 0 | 25 | 27 | 8474224  | 4.75E-01 | 1 |
| SERPINA5 | 316239  | 858  | 10  | 1031332 | 289784  | 0 | 5  | 1 | 0 | 50 | 75 | 18471772 | 4.75E-01 | 1 |
| JARID2   | 86503   | 782  | 34  | 3164484 | 903528  | 0 | 9  | 2 | 0 | 21 | 21 | 10896448 | 4.75E-01 | 1 |
| ROBO1    | 72749   | 790  | -19 | 4290512 | 1205416 | 0 | 14 | 2 | 0 | 13 | 15 | 5937012  | 4.75E-01 | 1 |
| PLXNA2   | 258618  | 627  | 10  | 4802796 | 1401216 | 0 | 16 | 5 | 0 | 44 | 48 | 18989040 | 4.75E-01 | 1 |
| ABLIM1   | 267957  | 257  | 13  | 2179076 | 573160  | 0 | 7  | 3 | 0 | 50 | 50 | 19995096 | 4.75E-01 | 1 |

|          |         |      |     |         |        |   |    |   |   |    |     |          |          |   |
|----------|---------|------|-----|---------|--------|---|----|---|---|----|-----|----------|----------|---|
| ARMCX5   | 95798   | NaN  | 27  | 1397300 | 393736 | 0 | 4  | 1 | 0 | 50 | 63  | 24065600 | 4.76E-01 | 1 |
| ARFGAP3  | 722786  | 187  | 60  | 1371668 | 348880 | 0 | 6  | 0 | 0 | 29 | 43  | 9912464  | 4.76E-01 | 1 |
| PLAC9    | 399614  | 626  | 2   | 247776  | 79032  | 0 | 1  | 0 | 0 | 50 | 60  | 22966628 | 4.76E-01 | 1 |
| SLC6A14  | 82720   | NaN  | 4   | 1680320 | 435388 | 0 | 6  | 2 | 0 | 50 | 76  | 26718512 | 4.76E-01 | 1 |
| RFPL4B   | 96263   | 432  | 0   | 660024  | 185832 | 0 | 3  | 0 | 0 | 50 | 53  | 22214044 | 4.76E-01 | 1 |
| LTV1     | 355969  | 455  | 5   | 1265580 | 302244 | 0 | 4  | 0 | 0 | 31 | 30  | 11408020 | 4.76E-01 | 1 |
| TUBD1    | 957047  | 216  | 26  | 1196516 | 292276 | 0 | 5  | 1 | 0 | 50 | 74  | 20292000 | 4.76E-01 | 1 |
| COG4     | 925955  | 131  | 47  | 2056968 | 553224 | 0 | 9  | 4 | 0 | 42 | 60  | 19810688 | 4.76E-01 | 1 |
| BCAS1    | 163555  | 415  | 2   | 1495912 | 425420 | 0 | 5  | 1 | 0 | 50 | 45  | 20863736 | 4.76E-01 | 1 |
| ZNF587   | 884988  | 781  | -38 | 1479536 | 374512 | 0 | 7  | 3 | 0 | 50 | 70  | 16966604 | 4.76E-01 | 1 |
| FARP1    | 494775  | 574  | 35  | 2913860 | 784624 | 0 | 6  | 3 | 0 | 22 | 30  | 9129264  | 4.76E-01 | 1 |
| SLC9A2   | 75782   | 858  | -5  | 2054832 | 597012 | 0 | 5  | 4 | 0 | 50 | 70  | 20934224 | 4.77E-01 | 1 |
| SRRT     | 1339207 | 433  | 48  | 2290504 | 600572 | 0 | 8  | 1 | 0 | 17 | 24  | 8713456  | 4.77E-01 | 1 |
| NFRSF10I | 640871  | 237  | 45  | 983628  | 292632 | 0 | 4  | 1 | 0 | 50 | 63  | 22177020 | 4.77E-01 | 1 |
| PFDN2    | 689033  | 250  | 23  | 404416  | 112496 | 0 | 2  | 0 | 0 | 50 | 68  | 19070564 | 4.77E-01 | 1 |
| GNL2     | 445473  | 274  | 30  | 1915280 | 496264 | 0 | 5  | 1 | 0 | 50 | 61  | 20995456 | 4.77E-01 | 1 |
| TNNI3K   | 87070   | 1135 | -16 | 2517988 | 648632 | 0 | 5  | 0 | 0 | 9  | 5   | 4210768  | 4.77E-01 | 1 |
| COPS8    | 336171  | 411  | 17  | 555004  | 147740 | 0 | 2  | 0 | 0 | 50 | 60  | 23292724 | 4.77E-01 | 1 |
| TGFBI    | 337362  | 298  | 32  | 1741552 | 518336 | 0 | 3  | 1 | 0 | 50 | 55  | 20111508 | 4.77E-01 | 1 |
| MAP1LC3B | 292439  | 337  | 1   | 320400  | 86508  | 0 | 1  | 0 | 0 | 50 | 49  | 24328328 | 4.77E-01 | 1 |
| SCRG1    | 249791  | 553  | 8   | 260236  | 65504  | 0 | 1  | 0 | 0 | 50 | 60  | 23005076 | 4.77E-01 | 1 |
| RAB37    | 929990  | 484  | 15  | 837312  | 236028 | 0 | 3  | 1 | 0 | 26 | 30  | 7658272  | 4.77E-01 | 1 |
| TEX2     | 1372704 | 292  | 15  | 2869360 | 814172 | 0 | 8  | 2 | 0 | 35 | 69  | 20590328 | 4.77E-01 | 1 |
| TBX4     | 312575  | 408  | -11 | 1377008 | 404416 | 0 | 4  | 1 | 0 | 45 | 36  | 19469284 | 4.77E-01 | 1 |
| ASPN     | NaN     | NaN  | NaN | 998580  | 252048 | 0 | 2  | 0 | 0 | 50 | 116 | 39897632 | 4.78E-01 | 1 |
| MRGPRX2  | 483720  | 695  | -1  | 807052  | 257744 | 0 | 3  | 0 | 0 | 13 | 12  | 4534728  | 4.78E-01 | 1 |
| MANEA    | 29596   | 1315 | -6  | 1186904 | 313636 | 0 | 4  | 1 | 0 | 50 | 48  | 20482104 | 4.78E-01 | 1 |
| SLC26A10 | 1329939 | 344  | 52  | 1399080 | 465648 | 0 | 4  | 1 | 0 | 50 | 73  | 24653712 | 4.78E-01 | 1 |
| INPP5F   | 656842  | 199  | 43  | 2947680 | 763620 | 0 | 10 | 4 | 0 | 35 | 40  | 15069124 | 4.78E-01 | 1 |
| TRIM63   | 748547  | 221  | 31  | 940196  | 228196 | 0 | 2  | 0 | 0 | 50 | 47  | 17463224 | 4.78E-01 | 1 |
| PHF11    | 422169  | 338  | 53  | 890712  | 211464 | 0 | 4  | 1 | 0 | 50 | 57  | 20409124 | 4.78E-01 | 1 |
| PRAMEF4  | 118495  | 792  | 12  | 1206484 | 341048 | 0 | 6  | 0 | 0 | 19 | 26  | 7005724  | 4.78E-01 | 1 |
| TTC33    | 211936  | 496  | -11 | 680672  | 178000 | 0 | 3  | 0 | 0 | 50 | 63  | 20505244 | 4.78E-01 | 1 |

|          |         |     |     |         |        |   |    |   |   |    |     |          |          |   |
|----------|---------|-----|-----|---------|--------|---|----|---|---|----|-----|----------|----------|---|
| FAM103A1 | 452169  | 683 | 19  | 338200  | 53756  | 0 | 1  | 0 | 0 | 50 | 66  | 24613128 | 4.78E-01 | 1 |
| TNFRSF9  | 381467  | 207 | 24  | 676044  | 174084 | 0 | 2  | 0 | 0 | 50 | 49  | 21387056 | 4.78E-01 | 1 |
| OR6C65   | 667726  | 802 | -14 | 779640  | 221076 | 0 | 3  | 0 | 0 | 50 | 83  | 19448636 | 4.78E-01 | 1 |
| SPIN3    | 145082  | NaN | 13  | 653260  | 180848 | 0 | 3  | 1 | 0 | 50 | 63  | 19011112 | 4.78E-01 | 1 |
| SPN      | NaN     | NaN | NaN | 933788  | 355288 | 0 | 2  | 0 | 0 | 50 | 116 | 40000872 | 4.78E-01 | 1 |
| GLUD1    | 397715  | 144 | 35  | 1442156 | 400144 | 0 | 5  | 2 | 0 | 50 | 55  | 18139268 | 4.78E-01 | 1 |
| RALGPS1  | 419512  | 353 | 41  | 1470992 | 393736 | 0 | 5  | 1 | 0 | 50 | 47  | 21724188 | 4.78E-01 | 1 |
| NDUFAB1  | 536544  | 561 | 43  | 408688  | 113564 | 0 | 2  | 1 | 0 | 33 | 45  | 12892540 | 4.79E-01 | 1 |
| CCL28    | 500147  | 320 | 6   | 335708  | 85084  | 0 | 1  | 0 | 0 | 50 | 56  | 25094796 | 4.79E-01 | 1 |
| BTF3     | 439732  | 289 | 38  | 529728  | 154860 | 0 | 2  | 0 | 0 | 50 | 51  | 17986900 | 4.79E-01 | 1 |
| LEPROT   | 239577  | 511 | -3  | 338912  | 96832  | 0 | 2  | 1 | 0 | 6  | 6   | 1879680  | 4.79E-01 | 1 |
| C22orf31 | 759735  | 335 | -19 | 734072  | 208972 | 0 | 2  | 1 | 0 | 50 | 74  | 21518776 | 4.79E-01 | 1 |
| PGAM4    | 549429  | NaN | 24  | 633324  | 183696 | 0 | 2  | 0 | 0 | 50 | 46  | 18656536 | 4.79E-01 | 1 |
| TMEM14B  | 263716  | 468 | 14  | 303312  | 86508  | 0 | 1  | 0 | 0 | 50 | 41  | 17401280 | 4.79E-01 | 1 |
| GPR87    | NaN     | NaN | NaN | 912784  | 248132 | 0 | 3  | 0 | 0 | 50 | 116 | 39893716 | 4.79E-01 | 1 |
| SDCBP2   | 417756  | 427 | 36  | 748668  | 224280 | 0 | 2  | 0 | 0 | 50 | 68  | 21321908 | 4.79E-01 | 1 |
| KRTAP4-9 | NaN     | NaN | NaN | 537204  | 138840 | 0 | 2  | 1 | 0 | 50 | 117 | 39784424 | 4.79E-01 | 1 |
| CCNG2    | 421623  | 562 | 33  | 901748  | 231400 | 0 | 3  | 1 | 0 | 50 | 47  | 18868356 | 4.79E-01 | 1 |
| RAB5B    | 2080397 | 229 | 31  | 566396  | 147028 | 0 | 3  | 1 | 0 | 50 | 68  | 20292000 | 4.79E-01 | 1 |
| YARS2    | 302215  | 238 | -4  | 1185480 | 365256 | 0 | 5  | 1 | 0 | 50 | 49  | 20721692 | 4.79E-01 | 1 |
| CHMP1B   | NaN     | NaN | NaN | 504808  | 135992 | 0 | 2  | 0 | 0 | 50 | 116 | 39781576 | 4.79E-01 | 1 |
| OR8B4    | 149616  | 857 | 0   | 761128  | 229976 | 0 | 8  | 2 | 0 | 2  | 3   | 683164   | 4.79E-01 | 1 |
| ZNF93    | 525535  | 761 | -55 | 1610188 | 392312 | 0 | 11 | 1 | 0 | 48 | 68  | 15977636 | 4.80E-01 | 1 |
| PPM1D    | 288701  | 328 | 15  | 1515848 | 447136 | 0 | 5  | 1 | 0 | 50 | 50  | 22587844 | 4.80E-01 | 1 |
| NEUROD6  | 48298   | 883 | -4  | 857248  | 229976 | 0 | 4  | 0 | 0 | 50 | 66  | 22538360 | 4.80E-01 | 1 |
| KCTD4    | 613630  | 276 | 60  | 653972  | 179068 | 0 | 3  | 1 | 0 | 50 | 54  | 19315136 | 4.80E-01 | 1 |
| FBLN7    | NaN     | NaN | NaN | 1111432 | 328232 | 0 | 5  | 2 | 0 | 50 | 118 | 39973816 | 4.80E-01 | 1 |
| DCAF12L1 | 11311   | NaN | -16 | 1124248 | 366680 | 0 | 5  | 1 | 0 | 50 | 105 | 24974468 | 4.80E-01 | 1 |
| PTH      | 264102  | 625 | -6  | 300820  | 79388  | 0 | 1  | 0 | 0 | 50 | 57  | 25441540 | 4.80E-01 | 1 |
| MGRN1    | 729674  | 157 | 41  | 1528664 | 437524 | 0 | 5  | 1 | 0 | 50 | 62  | 22211552 | 4.80E-01 | 1 |
| RPL4     | 507061  | 219 | 40  | 1100396 | 313636 | 0 | 3  | 0 | 0 | 25 | 13  | 7594904  | 4.80E-01 | 1 |
| SH3BP4   | 133390  | 408 | -10 | 2386624 | 714848 | 0 | 9  | 1 | 0 | 50 | 53  | 22859116 | 4.80E-01 | 1 |
| PPP1R13B | 712218  | 320 | 39  | 2762560 | 801356 | 0 | 6  | 1 | 0 | 13 | 10  | 6673220  | 4.80E-01 | 1 |

|          |         |      |     |         |        |   |    |   |   |    |     |          |          |   |
|----------|---------|------|-----|---------|--------|---|----|---|---|----|-----|----------|----------|---|
| CTSO     | 44515   | 745  | -2  | 842652  | 221076 | 0 | 2  | 1 | 0 | 12 | 13  | 5449648  | 4.80E-01 | 1 |
| ESYT2    | 286663  | 344  | 1   | 2286232 | 669992 | 0 | 6  | 3 | 0 | 28 | 30  | 15075888 | 4.80E-01 | 1 |
| TBX2     | 292199  | 414  | -9  | 1728024 | 582060 | 0 | 5  | 1 | 0 | 47 | 39  | 21536932 | 4.81E-01 | 1 |
| PLEKHA3  | 170323  | 555  | 37  | 795660  | 198648 | 0 | 3  | 1 | 0 | 50 | 50  | 18288788 | 4.81E-01 | 1 |
| MRPL17   | 424776  | 548  | 8   | 437524  | 134924 | 0 | 2  | 1 | 0 | 50 | 65  | 19789684 | 4.81E-01 | 1 |
| PTCHD3   | 345745  | 581  | 2   | 1918128 | 555360 | 0 | 10 | 5 | 0 | 9  | 16  | 4991476  | 4.81E-01 | 1 |
| ANKRD34  | NaN     | NaN  | NaN | 1162340 | 430048 | 0 | 5  | 2 | 0 | 50 | 118 | 40075632 | 4.81E-01 | 1 |
| ANKRD46  | 1144761 | 214  | 67  | 577788  | 168744 | 0 | 2  | 0 | 0 | 50 | 52  | 20627352 | 4.81E-01 | 1 |
| SRP68    | 1611239 | 218  | 22  | 1639024 | 439304 | 0 | 9  | 3 | 0 | 34 | 72  | 18207620 | 4.81E-01 | 1 |
| ZFY      | 0       | 0    | 0   | 2092568 | 506944 | 0 | 5  | 1 | 0 | 50 | 39  | 21173456 | 4.81E-01 | 1 |
| RPS26    | 2693176 | 215  | 38  | 299752  | 86864  | 0 | 1  | 0 | 0 | 50 | 53  | 18137132 | 4.81E-01 | 1 |
| PPP1R14C | 346933  | 439  | 30  | 421148  | 123532 | 0 | 1  | 0 | 0 | 50 | 44  | 25615268 | 4.82E-01 | 1 |
| HSD17B7  | 336864  | 396  | 12  | 887152  | 244928 | 0 | 2  | 0 | 0 | 50 | 70  | 25034632 | 4.82E-01 | 1 |
| AMHR2    | 1712232 | 191  | 56  | 1472416 | 413672 | 0 | 3  | 1 | 0 | 50 | 69  | 22534088 | 4.82E-01 | 1 |
| SMARCE1  | 1042327 | 196  | 19  | 1098260 | 264508 | 0 | 2  | 0 | 0 | 3  | 0   | 893560   | 4.82E-01 | 1 |
| KCNJ13   | 325071  | 328  | 33  | 923108  | 242080 | 0 | 3  | 1 | 0 | 50 | 45  | 19117556 | 4.82E-01 | 1 |
| KCNMB4   | 148192  | 547  | -7  | 536492  | 148096 | 0 | 3  | 1 | 0 | 50 | 63  | 19751948 | 4.82E-01 | 1 |
| SLC35F3  | 277114  | 649  | 1   | 1237812 | 365256 | 0 | 6  | 3 | 0 | 5  | 4   | 1597372  | 4.82E-01 | 1 |
| NKD1     | 307084  | 646  | -6  | 1201856 | 345676 | 0 | 4  | 0 | 0 | 50 | 53  | 23195180 | 4.82E-01 | 1 |
| RGL4     | 610486  | 266  | 30  | 1201856 | 359560 | 0 | 4  | 2 | 0 | 50 | 71  | 20499548 | 4.82E-01 | 1 |
| ADD1     | 669373  | 264  | 45  | 2001788 | 562480 | 0 | 12 | 5 | 0 | 2  | 7   | 1564264  | 4.82E-01 | 1 |
| CYB5R3   | 858524  | 189  | 74  | 894628  | 239588 | 0 | 3  | 0 | 0 | 50 | 49  | 21719560 | 4.83E-01 | 1 |
| FAM168B  | 461529  | 331  | 16  | 497332  | 156284 | 0 | 2  | 2 | 0 | 17 | 17  | 3531876  | 4.83E-01 | 1 |
| HPSE2    | 147172  | 933  | 2   | 1541124 | 450696 | 0 | 5  | 2 | 0 | 22 | 25  | 8837700  | 4.83E-01 | 1 |
| SAGE1    | 246199  | NaN  | 26  | 2352092 | 626560 | 0 | 9  | 2 | 0 | 50 | 66  | 25385292 | 4.83E-01 | 1 |
| NCAM2    | 14306   | 1515 | -61 | 2193672 | 563904 | 0 | 15 | 3 | 0 | 18 | 37  | 8943788  | 4.83E-01 | 1 |
| SNX20    | 294632  | 792  | 1   | 892136  | 284800 | 0 | 4  | 2 | 0 | 27 | 33  | 11357112 | 4.83E-01 | 1 |
| PSMB11   | 1261207 | 185  | 41  | 723036  | 243504 | 0 | 2  | 0 | 0 | 50 | 68  | 21572888 | 4.83E-01 | 1 |
| MLX      | 1884163 | 177  | 38  | 784268  | 205768 | 0 | 2  | 1 | 0 | 50 | 68  | 23826724 | 4.83E-01 | 1 |
| CDYL     | 116037  | 445  | 26  | 1392316 | 379496 | 0 | 4  | 0 | 0 | 8  | 6   | 4164844  | 4.83E-01 | 1 |
| SSX1     | 603602  | NaN  | 5   | 525100  | 110360 | 0 | 2  | 0 | 0 | 50 | 57  | 19263872 | 4.83E-01 | 1 |
| FMOD     | 552574  | 325  | 40  | 936992  | 279460 | 0 | 3  | 0 | 0 | 31 | 28  | 11098300 | 4.83E-01 | 1 |
| RMND1    | 336608  | 468  | 30  | 1182276 | 306516 | 0 | 5  | 1 | 0 | 45 | 38  | 16219360 | 4.83E-01 | 1 |

|         |         |      |     |          |         |   |    |    |   |    |     |          |          |   |
|---------|---------|------|-----|----------|---------|---|----|----|---|----|-----|----------|----------|---|
| TPRX1   | 881316  | 336  | 39  | 959776   | 366680  | 0 | 3  | 0  | 0 | 2  | 0   | 778928   | 4.84E-01 | 1 |
| PARP4   | 340065  | 606  | 39  | 4473140  | 1193668 | 0 | 17 | 4  | 0 | 50 | 46  | 18253900 | 4.84E-01 | 1 |
| GDPD3   | NaN     | NaN  | NaN | 829480   | 235316  | 0 | 4  | 1  | 0 | 50 | 117 | 39880900 | 4.84E-01 | 1 |
| TIMM44  | 960059  | 320  | 23  | 1184768  | 317908  | 0 | 4  | 1  | 0 | 50 | 63  | 19420512 | 4.84E-01 | 1 |
| AVL9    | 371440  | 595  | 10  | 1681744  | 461732  | 0 | 6  | 2  | 0 | 50 | 70  | 21482464 | 4.84E-01 | 1 |
| ALG2    | 203560  | 410  | 37  | 1024568  | 317908  | 0 | 5  | 2  | 0 | 4  | 6   | 1822720  | 4.84E-01 | 1 |
| PIGU    | 1057035 | 190  | 51  | 1128520  | 315416  | 0 | 4  | 2  | 0 | 50 | 72  | 19313356 | 4.85E-01 | 1 |
| SYNE1   | 79159   | 579  | 3   | 23033912 | 5872576 | 0 | 84 | 15 | 0 | 6  | 20  | 7316512  | 4.85E-01 | 1 |
| FFAR3   | 767113  | 472  | 9   | 841940   | 274120  | 0 | 3  | 0  | 0 | 32 | 25  | 10097228 | 4.85E-01 | 1 |
| GEMIN8  | 121538  | NaN  | 35  | 634748   | 156640  | 0 | 2  | 1  | 0 | 50 | 47  | 20728812 | 4.85E-01 | 1 |
| DMRT3   | 83374   | 703  | 9   | 1151304  | 370596  | 0 | 5  | 0  | 0 | 50 | 77  | 31222980 | 4.85E-01 | 1 |
| ZNF518B | 218121  | 1074 | 15  | 2694208  | 750092  | 0 | 7  | 0  | 0 | 5  | 2   | 2500900  | 4.85E-01 | 1 |
| SHOX    | NaN     | NaN  | NaN | 782844   | 223212  | 0 | 4  | 0  | 0 | 50 | 116 | 39868796 | 4.85E-01 | 1 |
| TMEM192 | 170385  | 595  | 0   | 699540   | 195444  | 0 | 2  | 0  | 0 | 50 | 45  | 20023576 | 4.85E-01 | 1 |
| ZNF695  | 385851  | 535  | -5  | 1352088  | 313992  | 0 | 7  | 1  | 0 | 9  | 8   | 3458896  | 4.85E-01 | 1 |
| PLD2    | 1465720 | 208  | 27  | 2394812  | 699184  | 0 | 4  | 1  | 0 | 36 | 34  | 12888624 | 4.85E-01 | 1 |
| ZNF836  | 460879  | 901  | -41 | 2410120  | 602708  | 0 | 7  | 3  | 0 | 45 | 56  | 16926020 | 4.85E-01 | 1 |
| ALMS1   | 777501  | 590  | 22  | 10442904 | 3005352 | 0 | 41 | 9  | 0 | 8  | 25  | 8117512  | 4.85E-01 | 1 |
| DHX29   | 280901  | 417  | 31  | 3562492  | 938060  | 0 | 9  | 1  | 0 | 11 | 9   | 6191196  | 4.86E-01 | 1 |
| CCL20   | 161901  | 296  | 7   | 261660   | 64080   | 0 | 1  | 0  | 0 | 50 | 47  | 18616308 | 4.86E-01 | 1 |
| GPNMB   | 505224  | 169  | 25  | 1474908  | 403704  | 0 | 8  | 4  | 0 | 18 | 17  | 5313300  | 4.86E-01 | 1 |
| OR5W2   | 4214    | 1074 | -46 | 768960   | 225348  | 0 | 6  | 3  | 0 | 3  | 3   | 1071916  | 4.86E-01 | 1 |
| CXCR5   | 1488276 | 175  | 54  | 904596   | 294768  | 0 | 2  | 0  | 0 | 20 | 24  | 8840192  | 4.86E-01 | 1 |
| E4F1    | 2179404 | 224  | 39  | 1967256  | 605556  | 0 | 3  | 3  | 0 | 50 | 46  | 19527312 | 4.86E-01 | 1 |
| SNCAIP  | 142971  | 684  | -6  | 2332156  | 658244  | 0 | 8  | 3  | 0 | 47 | 59  | 21746972 | 4.86E-01 | 1 |
| IL16    | 251183  | 742  | 17  | 3326820  | 1022076 | 0 | 13 | 1  | 0 | 6  | 3   | 2200080  | 4.86E-01 | 1 |
| ARFGEF1 | 307618  | 642  | 26  | 4853704  | 1236032 | 0 | 13 | 2  | 0 | 25 | 25  | 12302648 | 4.86E-01 | 1 |
| NEK9    | 919043  | 222  | 47  | 2519412  | 710220  | 0 | 6  | 1  | 0 | 25 | 41  | 16456812 | 4.86E-01 | 1 |
| GPR22   | 500763  | 753  | 12  | 1083664  | 311144  | 0 | 3  | 1  | 0 | 50 | 65  | 21876200 | 4.86E-01 | 1 |
| FAM84A  | 58286   | 1274 | -10 | 721612   | 221432  | 0 | 3  | 2  | 0 | 22 | 27  | 10008228 | 4.86E-01 | 1 |
| GPR162  | 2822601 | 232  | 32  | 1429340  | 488788  | 0 | 6  | 2  | 0 | 50 | 62  | 20662240 | 4.86E-01 | 1 |
| SLC6A16 | 2237411 | 309  | 35  | 1866152  | 542188  | 0 | 5  | 1  | 0 | 50 | 44  | 20641948 | 4.86E-01 | 1 |
| PGLYRP4 | 1140044 | 401  | 32  | 955148   | 277324  | 0 | 3  | 1  | 0 | 50 | 58  | 17066640 | 4.86E-01 | 1 |

|          |         |     |     |         |         |   |    |   |   |    |     |          |          |   |
|----------|---------|-----|-----|---------|---------|---|----|---|---|----|-----|----------|----------|---|
| NDUFA12  | 369755  | 560 | 25  | 384124  | 98612   | 0 | 1  | 0 | 0 | 50 | 54  | 25254284 | 4.86E-01 | 1 |
| IL1R2    | 215759  | 556 | 12  | 1026348 | 288360  | 0 | 3  | 1 | 0 | 20 | 14  | 7314020  | 4.86E-01 | 1 |
| C10orf99 | 216191  | 860 | -17 | 210752  | 62656   | 0 | 1  | 0 | 0 | 50 | 78  | 25295580 | 4.86E-01 | 1 |
| SPAG7    | 1416161 | 231 | 30  | 609472  | 148808  | 0 | 1  | 0 | 0 | 50 | 65  | 18681100 | 4.87E-01 | 1 |
| ZSCAN21  | 1503181 | 254 | 41  | 1212536 | 318976  | 0 | 4  | 1 | 0 | 50 | 81  | 27223676 | 4.87E-01 | 1 |
| PRAMEF19 | NaN     | NaN | NaN | 2397304 | 699896  | 0 | 9  | 3 | 0 | 50 | 119 | 40345480 | 4.87E-01 | 1 |
| AS3MT    | 711862  | 192 | 45  | 990392  | 258100  | 0 | 3  | 2 | 0 | 33 | 40  | 13181968 | 4.87E-01 | 1 |
| MOCOS    | 393505  | 591 | 40  | 2263448 | 648988  | 0 | 9  | 2 | 0 | 50 | 66  | 21522692 | 4.87E-01 | 1 |
| GNB2L1   | 1034999 | 415 | 35  | 815596  | 235316  | 0 | 3  | 0 | 0 | 15 | 19  | 5268088  | 4.87E-01 | 1 |
| ANAPC16  | 764632  | 140 | 40  | 283020  | 85440   | 0 | 1  | 0 | 0 | 50 | 51  | 21069148 | 4.87E-01 | 1 |
| PIGK     | 404438  | 673 | -17 | 1053048 | 260592  | 0 | 5  | 0 | 0 | 50 | 51  | 17159556 | 4.87E-01 | 1 |
| HSPB8    | 139110  | 779 | 3   | 492348  | 147384  | 0 | 2  | 1 | 0 | 24 | 23  | 8111816  | 4.87E-01 | 1 |
| UHRF1BP1 | 1047481 | 242 | 24  | 3665376 | 1037028 | 0 | 12 | 6 | 0 | 36 | 50  | 17203344 | 4.87E-01 | 1 |
| WARS2    | 163335  | 948 | -5  | 939840  | 271272  | 0 | 2  | 0 | 0 | 50 | 42  | 16793944 | 4.88E-01 | 1 |
| VAC14    | 857297  | 299 | 26  | 2006416 | 579212  | 0 | 8  | 2 | 0 | 14 | 19  | 5529036  | 4.88E-01 | 1 |
| TIE1     | 1091212 | 264 | 30  | 2869360 | 876116  | 0 | 12 | 4 | 0 | 11 | 11  | 3861532  | 4.88E-01 | 1 |
| CELA2A   | 554165  | 212 | 29  | 695268  | 203988  | 0 | 2  | 1 | 0 | 29 | 58  | 14632312 | 4.88E-01 | 1 |
| PPFIBP1  | 488829  | 369 | 7   | 2698480 | 689216  | 0 | 5  | 2 | 0 | 42 | 46  | 20787196 | 4.88E-01 | 1 |
| CFHR5    | 217857  | 853 | -24 | 1489504 | 375224  | 0 | 6  | 2 | 0 | 50 | 67  | 19868716 | 4.88E-01 | 1 |
| MAGEB4   | 74310   | NaN | 16  | 858316  | 253472  | 0 | 2  | 0 | 0 | 50 | 67  | 20445436 | 4.89E-01 | 1 |
| ZNF101   | 768855  | 418 | -10 | 1127096 | 288004  | 0 | 4  | 0 | 0 | 50 | 54  | 17193020 | 4.89E-01 | 1 |
| BFSP2    | 342402  | 497 | 14  | 1047352 | 311144  | 0 | 4  | 1 | 0 | 50 | 58  | 22195888 | 4.89E-01 | 1 |
| RFXAP    | 191525  | 731 | -15 | 681740  | 201496  | 0 | 2  | 1 | 0 | 26 | 45  | 11321868 | 4.89E-01 | 1 |
| AP4E1    | 343136  | 355 | 34  | 2950528 | 783200  | 0 | 7  | 0 | 0 | 2  | 1   | 1429340  | 4.89E-01 | 1 |
| OLAH     | 255576  | 571 | 28  | 836600  | 215380  | 0 | 3  | 0 | 0 | 50 | 59  | 22169188 | 4.89E-01 | 1 |
| ZNF560   | 557413  | 642 | -52 | 2056968 | 511572  | 0 | 10 | 4 | 0 | 36 | 84  | 24661544 | 4.89E-01 | 1 |
| CIAPIN1  | 749108  | 159 | 39  | 807052  | 229976  | 0 | 3  | 1 | 0 | 50 | 52  | 18373516 | 4.89E-01 | 1 |
| SPATA2   | 589377  | 181 | 48  | 1280888 | 394804  | 0 | 4  | 1 | 0 | 50 | 58  | 18928164 | 4.89E-01 | 1 |
| BTLA     | 304354  | 636 | 35  | 747600  | 198648  | 0 | 3  | 0 | 0 | 26 | 25  | 6830216  | 4.89E-01 | 1 |
| CD226    | 64726   | 630 | 40  | 875404  | 229976  | 0 | 3  | 0 | 0 | 38 | 35  | 14466416 | 4.89E-01 | 1 |
| IL18R1   | 235438  | 588 | 7   | 1418660 | 358492  | 0 | 3  | 2 | 0 | 32 | 31  | 14469264 | 4.89E-01 | 1 |
| FSTL3    | 1832767 | 218 | 10  | 663584  | 201496  | 0 | 2  | 0 | 0 | 29 | 50  | 17004696 | 4.89E-01 | 1 |
| CHST8    | 487426  | 623 | -26 | 1046640 | 327876  | 0 | 4  | 1 | 0 | 50 | 45  | 17394872 | 4.89E-01 | 1 |



|          |         |     |     |         |         |   |    |   |   |    |     |          |          |   |
|----------|---------|-----|-----|---------|---------|---|----|---|---|----|-----|----------|----------|---|
| TRAPPC2I | 860087  | 252 | 37  | 375936  | 95052   | 0 | 3  | 1 | 0 | 8  | 11  | 2710228  | 4.89E-01 | 1 |
| MOCS1    | 45558   | 966 | 22  | 1084376 | 324316  | 0 | 4  | 3 | 0 | 20 | 25  | 7501276  | 4.89E-01 | 1 |
| FAM163A  | 458564  | 479 | -8  | 416520  | 130296  | 0 | 2  | 0 | 0 | 50 | 70  | 22484604 | 4.89E-01 | 1 |
| UNC119B  | 1741363 | 349 | 42  | 643648  | 180848  | 0 | 3  | 1 | 0 | 50 | 64  | 18828840 | 4.89E-01 | 1 |
| ABCG1    | 289449  | 464 | 75  | 1872204 | 544680  | 0 | 6  | 3 | 0 | 41 | 52  | 15391660 | 4.90E-01 | 1 |
| FANCL    | 197920  | 617 | 9   | 1053760 | 257744  | 0 | 2  | 0 | 0 | 19 | 12  | 9703492  | 4.90E-01 | 1 |
| VMA21    | 247003  | NaN | -16 | 260236  | 75116   | 0 | 1  | 0 | 0 | 50 | 56  | 18211180 | 4.90E-01 | 1 |
| APOBEC3F | 1225154 | 223 | 75  | 551088  | 126024  | 0 | 3  | 1 | 0 | 5  | 4   | 1745824  | 4.90E-01 | 1 |
| MEM132I  | 492460  | 860 | -17 | 2721264 | 772164  | 0 | 12 | 4 | 0 | 50 | 61  | 17050620 | 4.90E-01 | 1 |
| DEFB115  | 562665  | 594 | -29 | 229976  | 59452   | 0 | 1  | 0 | 0 | 50 | 50  | 17157064 | 4.90E-01 | 1 |
| GINS3    | 695011  | 385 | -1  | 646140  | 186900  | 0 | 2  | 0 | 0 | 50 | 40  | 18092276 | 4.90E-01 | 1 |
| DYNLL1   | 1552470 | 216 | 46  | 245640  | 55536   | 0 | 1  | 0 | 0 | 50 | 64  | 22266732 | 4.90E-01 | 1 |
| F8       | 1741051 | NaN | 4   | 6075496 | 1594880 | 0 | 20 | 4 | 0 | 6  | 7   | 4213972  | 4.90E-01 | 1 |
| SNAI3    | 802673  | 189 | 41  | 712712  | 236740  | 0 | 3  | 0 | 0 | 50 | 65  | 20750172 | 4.90E-01 | 1 |
| ETS2     | 382323  | 151 | 5   | 1230692 | 311500  | 0 | 4  | 2 | 0 | 50 | 51  | 18508796 | 4.90E-01 | 1 |
| HIGD1C   | 569122  | 220 | 40  | 254896  | 66572   | 0 | 1  | 0 | 0 | 50 | 55  | 19943476 | 4.90E-01 | 1 |
| MS4A14   | 433906  | 899 | 24  | 1725532 | 470276  | 0 | 8  | 2 | 0 | 15 | 12  | 4671076  | 4.90E-01 | 1 |
| MRPL40   | 650407  | 300 | 16  | 531508  | 146672  | 0 | 3  | 1 | 0 | 9  | 15  | 4249216  | 4.90E-01 | 1 |
| OR6V1    | 314565  | 676 | -1  | 761840  | 243148  | 0 | 2  | 1 | 0 | 50 | 59  | 16752292 | 4.90E-01 | 1 |
| CARD17   | NaN     | NaN | NaN | 288004  | 80456   | 0 | 1  | 0 | 0 | 50 | 116 | 39726040 | 4.91E-01 | 1 |
| PPM1A    | 281503  | 630 | 36  | 1206484 | 300464  | 0 | 5  | 2 | 0 | 50 | 43  | 15820640 | 4.91E-01 | 1 |
| TMEM139  | 379894  | 399 | 14  | 531864  | 171948  | 0 | 2  | 0 | 0 | 50 | 67  | 22890088 | 4.91E-01 | 1 |
| AMOT     | 25417   | NaN | 10  | 2696344 | 822716  | 0 | 6  | 0 | 0 | 2  | 1   | 1456040  | 4.91E-01 | 1 |
| PIIF     | 326131  | 300 | 53  | 532220  | 157708  | 0 | 2  | 0 | 0 | 50 | 51  | 18466432 | 4.91E-01 | 1 |
| FGF13    | 14292   | NaN | -5  | 857248  | 220364  | 0 | 4  | 2 | 0 | 50 | 60  | 19015028 | 4.91E-01 | 1 |
| MEM194A  | 2026922 | 199 | 41  | 1149168 | 312924  | 0 | 3  | 1 | 0 | 50 | 67  | 21271000 | 4.91E-01 | 1 |
| RFX4     | 247645  | 482 | -1  | 2085804 | 559632  | 0 | 7  | 1 | 0 | 32 | 37  | 13294464 | 4.91E-01 | 1 |
| TMX2     | 922344  | 354 | 11  | 770028  | 213600  | 0 | 4  | 0 | 0 | 50 | 75  | 13734124 | 4.91E-01 | 1 |
| LAMB3    | 211663  | 300 | 4   | 2991112 | 861164  | 0 | 8  | 1 | 0 | 22 | 10  | 7584936  | 4.91E-01 | 1 |
| TMEM19   | 259684  | 393 | -11 | 850840  | 250268  | 0 | 2  | 0 | 0 | 50 | 34  | 20198728 | 4.91E-01 | 1 |
| ESM1     | 205256  | 603 | 13  | 476684  | 126736  | 0 | 2  | 0 | 0 | 50 | 61  | 19133220 | 4.91E-01 | 1 |
| APOLD1   | 767161  | 129 | 35  | 669636  | 241368  | 0 | 2  | 0 | 0 | 50 | 48  | 22604220 | 4.91E-01 | 1 |
| CXorf40B | 280868  | NaN | 34  | 400144  | 117836  | 0 | 1  | 0 | 0 | 50 | 40  | 17736988 | 4.91E-01 | 1 |

|          |         |     |     |         |        |   |    |   |   |    |     |          |          |   |
|----------|---------|-----|-----|---------|--------|---|----|---|---|----|-----|----------|----------|---|
| PMP22    | 228633  | 345 | -72 | 413672  | 121396 | 0 | 2  | 0 | 0 | 50 | 107 | 29414500 | 4.91E-01 | 1 |
| LCE5A    | 325831  | 700 | 20  | 300108  | 85440  | 0 | 1  | 0 | 0 | 50 | 63  | 27856288 | 4.91E-01 | 1 |
| MYNN     | 400732  | 689 | 2   | 1585980 | 401568 | 0 | 6  | 1 | 0 | 20 | 23  | 8190848  | 4.92E-01 | 1 |
| QTRT1    | 2174644 | 224 | 32  | 1025280 | 311856 | 0 | 3  | 2 | 0 | 50 | 77  | 23947408 | 4.92E-01 | 1 |
| C16orf92 | NaN     | NaN | NaN | 366680  | 89356  | 0 | 1  | 0 | 0 | 50 | 116 | 39734940 | 4.92E-01 | 1 |
| H2AFZ    | 202808  | 682 | 36  | 328944  | 101460 | 0 | 1  | 0 | 0 | 50 | 66  | 21102256 | 4.92E-01 | 1 |
| UGT2B11  | 18988   | 929 | 1   | 1367040 | 354576 | 0 | 2  | 0 | 0 | 4  | 3   | 3027780  | 4.92E-01 | 1 |
| NAP1L5   | 177679  | 486 | 8   | 466004  | 120328 | 0 | 2  | 0 | 0 | 50 | 67  | 20305884 | 4.92E-01 | 1 |
| ADARB2   | 284080  | 633 | 8   | 1810260 | 599148 | 0 | 8  | 4 | 0 | 50 | 70  | 20533368 | 4.92E-01 | 1 |
| PLCL1    | 627125  | 907 | 10  | 2784276 | 748668 | 0 | 13 | 3 | 0 | 50 | 63  | 21810340 | 4.92E-01 | 1 |
| HR       | 584373  | 219 | 34  | 2951952 | 937704 | 0 | 5  | 0 | 0 | 5  | 0   | 2362772  | 4.92E-01 | 1 |
| OR5B21   | 190469  | 812 | -10 | 761484  | 229620 | 0 | 4  | 1 | 0 | 50 | 71  | 21027140 | 4.92E-01 | 1 |
| ADRB2    | 298390  | 408 | 22  | 1027772 | 298684 | 0 | 3  | 1 | 0 | 50 | 44  | 21127176 | 4.92E-01 | 1 |
| SRGN     | 766231  | 183 | 55  | 406196  | 113920 | 0 | 2  | 0 | 0 | 50 | 84  | 21063808 | 4.92E-01 | 1 |
| CNNM4    | 936233  | 332 | 49  | 1924536 | 589536 | 0 | 8  | 3 | 0 | 50 | 82  | 22478908 | 4.92E-01 | 1 |
| FCRL2    | 113186  | 829 | 26  | 1315420 | 364544 | 0 | 4  | 2 | 0 | 50 | 40  | 19626636 | 4.92E-01 | 1 |
| RAB18    | 313003  | 549 | 0   | 551444  | 139552 | 0 | 3  | 1 | 0 | 50 | 70  | 21942772 | 4.92E-01 | 1 |
| IFNA16   | 193208  | 498 | -3  | 480244  | 130652 | 0 | 2  | 0 | 0 | 50 | 58  | 18347172 | 4.92E-01 | 1 |
| SLC35B1  | 880183  | 361 | 30  | 831260  | 239944 | 0 | 3  | 0 | 0 | 50 | 53  | 20258180 | 4.93E-01 | 1 |
| RANGAP1  | 1301913 | 179 | 53  | 1507304 | 440728 | 0 | 4  | 2 | 0 | 37 | 34  | 14111128 | 4.93E-01 | 1 |
| RNPEP    | 751933  | 168 | 31  | 1652196 | 478464 | 0 | 3  | 0 | 0 | 13 | 9   | 5941284  | 4.93E-01 | 1 |
| MAPK11   | 939384  | 257 | 70  | 953012  | 265576 | 0 | 3  | 1 | 0 | 50 | 46  | 19591036 | 4.93E-01 | 1 |
| OR13A1   | 126925  | 808 | 26  | 813104  | 245284 | 0 | 2  | 0 | 0 | 50 | 38  | 20112220 | 4.93E-01 | 1 |
| SCARB2   | 515813  | 403 | 39  | 1252764 | 328944 | 0 | 4  | 1 | 0 | 50 | 85  | 27607800 | 4.93E-01 | 1 |
| ETAA1    | 36002   | 401 | -3  | 2381640 | 609828 | 0 | 6  | 1 | 0 | 50 | 53  | 21722052 | 4.93E-01 | 1 |
| CDC42SE1 | 1614665 | 165 | 40  | 216092  | 53044  | 0 | 1  | 0 | 0 | 50 | 62  | 20369964 | 4.93E-01 | 1 |
| SCLY     | 435787  | 356 | 32  | 1142048 | 336064 | 0 | 2  | 1 | 0 | 50 | 37  | 15650116 | 4.93E-01 | 1 |
| UBC      | 1090586 | 206 | 33  | 1698476 | 505876 | 0 | 5  | 2 | 0 | 50 | 63  | 17866216 | 4.93E-01 | 1 |
| EIF2B1   | 871640  | 315 | 40  | 792100  | 222500 | 0 | 1  | 0 | 0 | 50 | 59  | 21342912 | 4.93E-01 | 1 |
| AMDHD1   | 366272  | 436 | 8   | 1091496 | 310788 | 0 | 3  | 1 | 0 | 50 | 55  | 19720976 | 4.93E-01 | 1 |
| MALT1    | 331493  | 198 | 55  | 2148460 | 563192 | 0 | 7  | 2 | 0 | 50 | 51  | 18885088 | 4.93E-01 | 1 |
| STOML2   | 945481  | 350 | 41  | 902816  | 281596 | 0 | 4  | 0 | 0 | 24 | 35  | 10864052 | 4.93E-01 | 1 |
| EYA3     | 827177  | 316 | 28  | 1513712 | 398008 | 0 | 4  | 0 | 0 | 22 | 22  | 10038132 | 4.93E-01 | 1 |

|          |         |      |     |         |         |   |    |   |   |    |     |          |          |   |
|----------|---------|------|-----|---------|---------|---|----|---|---|----|-----|----------|----------|---|
| PCDHGA5  | NaN     | NaN  | NaN | 2285164 | 731936  | 0 | 11 | 3 | 0 | 50 | 119 | 40377520 | 4.93E-01 | 1 |
| CCNDBP1  | 843516  | 333  | 42  | 949808  | 251692  | 0 | 2  | 0 | 0 | 25 | 24  | 10413000 | 4.93E-01 | 1 |
| CPEB4    | 164298  | 381  | 43  | 1862236 | 515132  | 0 | 4  | 0 | 0 | 6  | 2   | 2412256  | 4.94E-01 | 1 |
| ARHGAP1  | 272834  | 185  | 22  | 2259532 | 649700  | 0 | 5  | 1 | 0 | 29 | 35  | 14403404 | 4.94E-01 | 1 |
| STAMBP   | 1124858 | 404  | 43  | 1100752 | 299396  | 0 | 4  | 0 | 0 | 50 | 76  | 19904316 | 4.94E-01 | 1 |
| SEMA3F   | 905995  | 196  | 40  | 2002856 | 592384  | 0 | 6  | 2 | 0 | 50 | 72  | 22424796 | 4.94E-01 | 1 |
| C7       | 211302  | 644  | 5   | 2206844 | 569956  | 0 | 4  | 0 | 0 | 23 | 11  | 9665400  | 4.94E-01 | 1 |
| RASGRP2  | 2042840 | 230  | 60  | 1574588 | 448204  | 0 | 3  | 1 | 0 | 50 | 73  | 23729892 | 4.94E-01 | 1 |
| PODXL2   | 679358  | 336  | 45  | 1512288 | 461376  | 0 | 6  | 1 | 0 | 12 | 11  | 5764352  | 4.94E-01 | 1 |
| MRPL11   | 1941577 | 194  | 51  | 551444  | 170524  | 0 | 2  | 0 | 0 | 50 | 57  | 20121476 | 4.94E-01 | 1 |
| ADAD1    | 227942  | 612  | -14 | 1505880 | 391956  | 0 | 4  | 1 | 0 | 50 | 46  | 18207264 | 4.94E-01 | 1 |
| RXFP1    | 151976  | 534  | -10 | 2003212 | 502316  | 0 | 7  | 1 | 0 | 9  | 17  | 5391620  | 4.94E-01 | 1 |
| VPS52    | 1456953 | 262  | 30  | 1861880 | 538984  | 0 | 8  | 3 | 0 | 50 | 71  | 20945260 | 4.94E-01 | 1 |
| MAPK4    | 243391  | 442  | 21  | 1467432 | 433608  | 0 | 5  | 2 | 0 | 50 | 65  | 21114360 | 4.94E-01 | 1 |
| RBM34    | 592746  | 168  | 26  | 1152016 | 294056  | 0 | 2  | 1 | 0 | 50 | 42  | 17770096 | 4.94E-01 | 1 |
| LRRC2    | 283343  | 528  | 42  | 984696  | 241368  | 0 | 5  | 0 | 0 | 50 | 62  | 18868356 | 4.94E-01 | 1 |
| IMP4     | 369510  | 593  | 29  | 748312  | 223568  | 0 | 4  | 1 | 0 | 4  | 3   | 1551092  | 4.95E-01 | 1 |
| ZNF786   | 598458  | 279  | 31  | 1982920 | 538628  | 0 | 5  | 4 | 0 | 30 | 41  | 13865132 | 4.95E-01 | 1 |
| LAYN     | 418517  | 326  | 21  | 968676  | 258456  | 0 | 3  | 1 | 0 | 16 | 11  | 6918504  | 4.95E-01 | 1 |
| THAP7    | 577297  | 192  | 58  | 763620  | 244572  | 0 | 4  | 2 | 0 | 47 | 75  | 19222576 | 4.95E-01 | 1 |
| ITPK1    | 326946  | 326  | 35  | 1111432 | 310076  | 0 | 3  | 1 | 0 | 50 | 38  | 19108300 | 4.95E-01 | 1 |
| ZNF350   | 452542  | 838  | -61 | 1371312 | 349236  | 0 | 6  | 1 | 0 | 50 | 69  | 16927444 | 4.95E-01 | 1 |
| DMTF1    | 169233  | 1011 | 4   | 1981852 | 524744  | 0 | 6  | 2 | 0 | 50 | 57  | 21922836 | 4.95E-01 | 1 |
| KLRF1    | 226318  | 648  | 33  | 626204  | 143824  | 0 | 3  | 0 | 0 | 50 | 62  | 18130012 | 4.95E-01 | 1 |
| PINX1    | 116190  | 574  | 16  | 866860  | 217160  | 0 | 3  | 0 | 0 | 50 | 52  | 20040664 | 4.95E-01 | 1 |
| ZNF761   | 361546  | 876  | -58 | 1944116 | 463156  | 0 | 13 | 1 | 0 | 6  | 9   | 2344260  | 4.95E-01 | 1 |
| GDPD2    | 270766  | NaN  | 38  | 1512288 | 449628  | 0 | 5  | 1 | 0 | 43 | 50  | 16418720 | 4.95E-01 | 1 |
| ALK      | 202198  | 882  | 19  | 4104324 | 1208976 | 0 | 11 | 3 | 0 | 35 | 33  | 15082652 | 4.96E-01 | 1 |
| PPP1CC   | 796153  | 347  | 50  | 850484  | 213244  | 0 | 2  | 0 | 0 | 50 | 62  | 19622364 | 4.96E-01 | 1 |
| PRRT1    | 2119974 | 392  | 28  | 728376  | 268068  | 0 | 1  | 0 | 0 | 50 | 62  | 23774036 | 4.96E-01 | 1 |
| LEAP2    | 686574  | 200  | 66  | 203276  | 57316   | 0 | 1  | 0 | 0 | 50 | 52  | 16038868 | 4.96E-01 | 1 |
| PLA2G2A  | 490325  | 466  | 25  | 383056  | 94340   | 0 | 1  | 0 | 0 | 50 | 36  | 17418368 | 4.96E-01 | 1 |
| C10orf11 | 29386   | 1001 | 3   | 520828  | 140264  | 0 | 2  | 0 | 0 | 50 | 65  | 21416248 | 4.96E-01 | 1 |

|           |         |      |     |         |         |   |    |   |   |    |    |          |          |   |
|-----------|---------|------|-----|---------|---------|---|----|---|---|----|----|----------|----------|---|
| CCDC69    | 916138  | 407  | 56  | 782844  | 202920  | 0 | 2  | 0 | 0 | 50 | 59 | 17889712 | 4.96E-01 | 1 |
| IIST1H2AI | NaN     | NaN  | NaN | 314704  | 107156  | 0 | 4  | 2 | 0 | 2  | 6  | 963692   | 4.96E-01 | 1 |
| GMDS      | 160107  | 647  | 20  | 977932  | 259880  | 0 | 3  | 1 | 0 | 50 | 50 | 19795380 | 4.96E-01 | 1 |
| KRT38     | 1321356 | 424  | -6  | 1154508 | 335352  | 0 | 5  | 2 | 0 | 50 | 49 | 16872976 | 4.96E-01 | 1 |
| SRRM4     | 116468  | 835  | 2   | 1548600 | 463512  | 0 | 6  | 3 | 0 | 30 | 36 | 10425104 | 4.96E-01 | 1 |
| SMPD2     | 328699  | 559  | 47  | 1086868 | 312212  | 0 | 2  | 0 | 0 | 50 | 46 | 17980492 | 4.97E-01 | 1 |
| UBQLN1    | 481151  | 422  | -3  | 1519408 | 413672  | 0 | 2  | 1 | 0 | 50 | 58 | 20655120 | 4.97E-01 | 1 |
| LCMT1     | 273088  | 418  | 23  | 889288  | 226772  | 0 | 1  | 1 | 0 | 50 | 39 | 17977288 | 4.97E-01 | 1 |
| APOBEC2   | 145501  | 611  | 37  | 571736  | 157708  | 0 | 2  | 1 | 0 | 50 | 56 | 20220800 | 4.97E-01 | 1 |
| HIAT1     | 292450  | 530  | 4   | 1253476 | 366680  | 0 | 4  | 1 | 0 | 50 | 75 | 23594612 | 4.97E-01 | 1 |
| SERPINB3  | 174293  | 370  | -5  | 1026704 | 255964  | 0 | 3  | 2 | 0 | 9  | 11 | 4391972  | 4.97E-01 | 1 |
| GP9       | 1155221 | 379  | 52  | 422216  | 152368  | 0 | 2  | 0 | 0 | 50 | 73 | 19769036 | 4.97E-01 | 1 |
| TTC23     | 273585  | 361  | -7  | 1161272 | 316840  | 0 | 3  | 1 | 0 | 31 | 26 | 14227896 | 4.97E-01 | 1 |
| RAB33A    | 339869  | NaN  | 58  | 599148  | 167676  | 0 | 1  | 1 | 0 | 50 | 61 | 17320468 | 4.97E-01 | 1 |
| PAX7      | 520847  | 598  | 28  | 1406912 | 420436  | 0 | 5  | 1 | 0 | 17 | 19 | 9301212  | 4.97E-01 | 1 |
| OR2T11    | 116628  | 850  | -20 | 774300  | 241368  | 0 | 3  | 1 | 0 | 50 | 57 | 19537280 | 4.97E-01 | 1 |
| HIST4H4   | 340728  | 578  | -4  | 249556  | 87932   | 0 | 2  | 1 | 0 | 4  | 5  | 737988   | 4.97E-01 | 1 |
| MAD2L1    | 106139  | 1069 | -5  | 532220  | 144892  | 0 | 2  | 0 | 0 | 50 | 55 | 18853404 | 4.97E-01 | 1 |
| MTHFS     | 221773  | 711  | 9   | 522252  | 142044  | 0 | 2  | 0 | 0 | 50 | 64 | 21697488 | 4.97E-01 | 1 |
| CLEC5A    | 198115  | 856  | -6  | 513708  | 117480  | 0 | 2  | 0 | 0 | 50 | 61 | 21007204 | 4.98E-01 | 1 |
| MKLN1     | 258333  | 283  | 35  | 2002856 | 467428  | 0 | 4  | 1 | 0 | 50 | 48 | 18913568 | 4.98E-01 | 1 |
| RDH8      | 1555841 | 413  | 0   | 771096  | 249912  | 0 | 3  | 0 | 0 | 50 | 64 | 22283108 | 4.98E-01 | 1 |
| BDNF      | 380275  | 534  | -24 | 922040  | 253828  | 0 | 3  | 0 | 0 | 33 | 46 | 13575704 | 4.98E-01 | 1 |
| HOXB3     | 946208  | 524  | 29  | 1050912 | 337488  | 0 | 4  | 1 | 0 | 50 | 60 | 17564684 | 4.98E-01 | 1 |
| OTUD7A    | 155907  | 445  | 13  | 2291572 | 723392  | 0 | 6  | 1 | 0 | 45 | 49 | 20161704 | 4.98E-01 | 1 |
| FAM60A    | 317612  | 468  | 6   | 587756  | 144892  | 0 | 2  | 0 | 0 | 50 | 54 | 20581072 | 4.98E-01 | 1 |
| NTNG1     | 78332   | 877  | -17 | 1496980 | 401924  | 0 | 6  | 1 | 0 | 38 | 48 | 17472124 | 4.98E-01 | 1 |
| SPRY4     | 394296  | 573  | 28  | 800644  | 242792  | 0 | 3  | 0 | 0 | 50 | 63 | 22212620 | 4.98E-01 | 1 |
| CCL3      | 744143  | 565  | 28  | 244216  | 64436   | 0 | 1  | 0 | 0 | 50 | 68 | 23933524 | 4.98E-01 | 1 |
| GON4L     | 2156898 | 179  | 33  | 5829856 | 1607696 | 0 | 24 | 5 | 0 | 2  | 6  | 2277332  | 4.98E-01 | 1 |
| PCDHGA2   | 662513  | 568  | 2   | 2307592 | 741548  | 0 | 7  | 4 | 0 | 50 | 85 | 24954176 | 4.98E-01 | 1 |
| KLK5      | 581408  | 606  | 29  | 754008  | 213600  | 0 | 3  | 1 | 0 | 50 | 56 | 18321184 | 4.98E-01 | 1 |
| CHI3L2    | 400425  | 627  | 41  | 1028840 | 268780  | 0 | 3  | 1 | 0 | 50 | 66 | 20484952 | 4.98E-01 | 1 |

|          |         |      |     |         |         |   |    |   |   |    |     |          |          |   |
|----------|---------|------|-----|---------|---------|---|----|---|---|----|-----|----------|----------|---|
| UGT1A3   | NaN     | NaN  | NaN | 1345324 | 385904  | 0 | 5  | 0 | 0 | 50 | 116 | 40031488 | 4.98E-01 | 1 |
| KLHL31   | 306333  | 404  | 20  | 1586692 | 456392  | 0 | 3  | 1 | 0 | 5  | 6   | 3893216  | 4.98E-01 | 1 |
| NELL2    | 79685   | 930  | -19 | 2383064 | 583840  | 0 | 8  | 1 | 0 | 23 | 28  | 9930620  | 4.98E-01 | 1 |
| SMC1A    | 920771  | NaN  | 70  | 3256688 | 801712  | 0 | 11 | 2 | 0 | 6  | 10  | 3616248  | 4.98E-01 | 1 |
| DEFB112  | 65301   | 1242 | -3  | 296192  | 72268   | 0 | 2  | 1 | 0 | 4  | 6   | 1594168  | 4.99E-01 | 1 |
| GDF15    | 1294357 | 210  | 39  | 734428  | 262016  | 0 | 1  | 1 | 0 | 50 | 67  | 22067728 | 4.99E-01 | 1 |
| STARD5   | 245396  | 787  | 28  | 556072  | 153080  | 0 | 2  | 0 | 0 | 50 | 56  | 20277404 | 4.99E-01 | 1 |
| C15orf59 | 313132  | 435  | 29  | 720900  | 225348  | 0 | 2  | 1 | 0 | 35 | 31  | 15192656 | 4.99E-01 | 1 |
| LSAMP    | 121424  | 967  | -6  | 855468  | 256320  | 0 | 4  | 1 | 0 | 50 | 64  | 19201572 | 4.99E-01 | 1 |
| SPAG4    | 1423559 | 169  | 53  | 1122112 | 330368  | 0 | 5  | 2 | 0 | 50 | 53  | 18644076 | 4.99E-01 | 1 |
| NOS1     | 201056  | 259  | 13  | 3676768 | 1036316 | 0 | 14 | 5 | 0 | 50 | 57  | 17797508 | 4.99E-01 | 1 |
| CAMK1G   | 204559  | 405  | -3  | 1247780 | 331792  | 0 | 3  | 0 | 0 | 50 | 37  | 21331164 | 4.99E-01 | 1 |
| TIMP3    | 259538  | 398  | -69 | 553224  | 143112  | 0 | 1  | 1 | 0 | 50 | 107 | 27994060 | 4.99E-01 | 1 |
| LANCL1   | 159584  | 453  | 3   | 1043080 | 276968  | 0 | 2  | 1 | 0 | 50 | 43  | 17836312 | 4.99E-01 | 1 |
| OLIG3    | 210173  | 486  | 29  | 662160  | 212532  | 0 | 3  | 2 | 0 | 20 | 29  | 8755820  | 4.99E-01 | 1 |
| UBE2H    | 456399  | 226  | 34  | 497332  | 117836  | 0 | 2  | 0 | 0 | 50 | 56  | 20586056 | 4.99E-01 | 1 |
| P2RX3    | 923815  | 191  | -3  | 1049488 | 276968  | 0 | 4  | 1 | 0 | 50 | 67  | 17960912 | 4.99E-01 | 1 |
| CD109    | 706356  | 215  | 15  | 3760428 | 1009260 | 0 | 14 | 5 | 0 | 50 | 57  | 20366760 | 5.00E-01 | 1 |
| PHYHD1   | 1580914 | 198  | 21  | 911004  | 114276  | 0 | 5  | 0 | 0 | 50 | 84  | 22627360 | 5.00E-01 | 1 |
| CLRN2    | 271399  | 912  | 37  | 583484  | 175864  | 0 | 2  | 1 | 0 | 50 | 49  | 17602776 | 5.00E-01 | 1 |
| FOXS1    | 1015946 | 241  | 37  | 794948  | 267712  | 0 | 4  | 1 | 0 | 50 | 52  | 17181628 | 5.00E-01 | 1 |
| ZNF845   | NaN     | NaN  | NaN | 2514428 | 609472  | 0 | 10 | 2 | 0 | 50 | 118 | 40255056 | 5.00E-01 | 1 |
| SCTR     | 211577  | 497  | 30  | 1145252 | 318976  | 0 | 5  | 2 | 0 | 43 | 54  | 18229692 | 5.00E-01 | 1 |
| ZNF202   | 386097  | 609  | 0   | 1654688 | 450340  | 0 | 5  | 1 | 0 | 50 | 70  | 24114016 | 5.00E-01 | 1 |
| CHODL    | 272100  | 981  | -58 | 713780  | 185476  | 0 | 2  | 0 | 0 | 50 | 51  | 18771168 | 5.00E-01 | 1 |
| MAPT     | 369065  | 469  | 19  | 1946252 | 603064  | 0 | 6  | 4 | 0 | 50 | 66  | 24993692 | 5.00E-01 | 1 |
| ATXN2    | 523776  | 302  | 42  | 3326108 | 986476  | 0 | 5  | 1 | 0 | 11 | 6   | 5005716  | 5.00E-01 | 1 |
| SLC25A3  | 487754  | 218  | 21  | 1030620 | 296904  | 0 | 1  | 0 | 0 | 6  | 1   | 2386980  | 5.00E-01 | 1 |
| PALLD    | 173564  | 359  | -4  | 3410124 | 1007124 | 0 | 9  | 2 | 0 | 50 | 50  | 24631284 | 5.00E-01 | 1 |
| AMIGO3   | NaN     | NaN  | NaN | 1201144 | 416876  | 0 | 8  | 5 | 0 | 8  | 21  | 4342844  | 5.00E-01 | 1 |
| SFTPB    | 1158965 | 170  | 43  | 1016024 | 293344  | 0 | 3  | 2 | 0 | 36 | 48  | 15827404 | 5.00E-01 | 1 |
| KLK14    | 490795  | 632  | 22  | 673196  | 206836  | 0 | 3  | 1 | 0 | 50 | 58  | 16739120 | 5.00E-01 | 1 |
| UTS2     | 375594  | 415  | 23  | 440372  | 112852  | 0 | 2  | 1 | 0 | 6  | 6   | 2414748  | 5.00E-01 | 1 |

|          |         |     |     |         |        |   |    |   |   |    |     |          |          |   |
|----------|---------|-----|-----|---------|--------|---|----|---|---|----|-----|----------|----------|---|
| H2AFJ    | 340728  | 578 | -4  | 308296  | 108224 | 0 | 2  | 1 | 0 | 15 | 22  | 4762924  | 5.01E-01 | 1 |
| IL7      | 52129   | 920 | 6   | 480244  | 111428 | 0 | 1  | 0 | 0 | 50 | 50  | 23625228 | 5.01E-01 | 1 |
| TMEM182  | 63440   | 913 | -3  | 594520  | 159488 | 0 | 3  | 0 | 0 | 50 | 72  | 19428344 | 5.01E-01 | 1 |
| PPP1R3D  | 73597   | 856 | -36 | 711644  | 249556 | 0 | 3  | 0 | 0 | 50 | 68  | 20110084 | 5.01E-01 | 1 |
| EGFL7    | 1918290 | 190 | 56  | 705236  | 206836 | 0 | 2  | 1 | 0 | 50 | 46  | 19629484 | 5.01E-01 | 1 |
| MASTL    | 386910  | 555 | 43  | 2270568 | 595944 | 0 | 9  | 1 | 0 | 50 | 43  | 17116480 | 5.01E-01 | 1 |
| SHARPIN  | 2720766 | 211 | 27  | 956572  | 325028 | 0 | 2  | 1 | 0 | 31 | 38  | 13524084 | 5.01E-01 | 1 |
| CLDN23   | 174979  | 307 | 34  | 699896  | 238876 | 0 | 1  | 1 | 0 | 50 | 59  | 18757996 | 5.01E-01 | 1 |
| OR2B6    | 225015  | 562 | 24  | 761840  | 242080 | 0 | 2  | 0 | 0 | 50 | 45  | 21563988 | 5.01E-01 | 1 |
| CCDC86   | 794900  | 522 | 47  | 882880  | 286580 | 0 | 3  | 1 | 0 | 50 | 51  | 21913580 | 5.01E-01 | 1 |
| REEP2    | 1196831 | 209 | 49  | 651124  | 189392 | 0 | 2  | 0 | 0 | 50 | 63  | 23144984 | 5.01E-01 | 1 |
| ELAC1    | 189022  | 332 | 51  | 914208  | 264864 | 0 | 2  | 0 | 0 | 50 | 48  | 17856248 | 5.01E-01 | 1 |
| FBXL20   | 1467668 | 179 | 20  | 1147388 | 312568 | 0 | 3  | 1 | 0 | 50 | 60  | 18894344 | 5.01E-01 | 1 |
| REL      | 635308  | 439 | 34  | 1606984 | 422216 | 0 | 4  | 1 | 0 | 35 | 32  | 14206180 | 5.01E-01 | 1 |
| OR52B2   | 465433  | 806 | -1  | 784624  | 252404 | 0 | 2  | 1 | 0 | 8  | 7   | 2668576  | 5.01E-01 | 1 |
| E2F4     | 1109491 | 150 | 46  | 1058388 | 308652 | 0 | 2  | 0 | 0 | 6  | 2   | 3107880  | 5.01E-01 | 1 |
| UBTD1    | 560569  | 169 | 41  | 569600  | 169456 | 0 | 2  | 0 | 0 | 50 | 57  | 20350384 | 5.01E-01 | 1 |
| CLDN22   | NaN     | NaN | NaN | 537916  | 170168 | 0 | 2  | 1 | 0 | 50 | 117 | 39815752 | 5.02E-01 | 1 |
| IFI30    | 1249693 | 226 | 42  | 645428  | 186544 | 0 | 1  | 0 | 0 | 50 | 80  | 23882616 | 5.02E-01 | 1 |
| TBCA     | 251029  | 581 | 40  | 297616  | 64436  | 0 | 1  | 0 | 0 | 50 | 41  | 17733784 | 5.02E-01 | 1 |
| ANKRD42  | 308108  | 414 | 18  | 1034536 | 253472 | 0 | 3  | 0 | 0 | 27 | 29  | 15630180 | 5.02E-01 | 1 |
| EVL      | 453415  | 234 | 27  | 1097904 | 302244 | 0 | 4  | 0 | 0 | 8  | 4   | 1823788  | 5.02E-01 | 1 |
| RAP1GAP  | 529490  | 297 | 34  | 1988972 | 535780 | 0 | 3  | 1 | 0 | 50 | 51  | 21530168 | 5.02E-01 | 1 |
| CDK16    | 819569  | NaN | 38  | 1479180 | 433608 | 0 | 7  | 2 | 0 | 50 | 54  | 16576428 | 5.02E-01 | 1 |
| GPRIN2   | NaN     | NaN | NaN | 1098972 | 375936 | 0 | 3  | 2 | 0 | 50 | 118 | 40021520 | 5.02E-01 | 1 |
| PBX3     | 491989  | 545 | 36  | 1123892 | 304024 | 0 | 3  | 0 | 0 | 38 | 47  | 16552576 | 5.02E-01 | 1 |
| SERP1    | 503198  | 347 | 15  | 181916  | 41296  | 0 | 1  | 0 | 0 | 50 | 86  | 22944912 | 5.02E-01 | 1 |
| LYZL1    | 172530  | 439 | 3   | 511572  | 132432 | 0 | 2  | 0 | 0 | 50 | 51  | 17170948 | 5.02E-01 | 1 |
| SLC22A10 | 1307417 | 572 | 17  | 1365616 | 409400 | 0 | 5  | 2 | 0 | 50 | 74  | 21257472 | 5.02E-01 | 1 |
| GOLPH3L  | 1611525 | 178 | 42  | 722324  | 211108 | 0 | 3  | 0 | 0 | 50 | 66  | 20744120 | 5.03E-01 | 1 |
| WDR6     | 1799657 | 241 | 41  | 2800652 | 911716 | 0 | 10 | 2 | 0 | 41 | 61  | 18921044 | 5.03E-01 | 1 |
| MOGAT2   | 528291  | 418 | 45  | 848704  | 244928 | 0 | 3  | 1 | 0 | 50 | 74  | 25033920 | 5.03E-01 | 1 |
| JPH2     | 526607  | 344 | 21  | 1707732 | 560700 | 0 | 5  | 1 | 0 | 50 | 50  | 22619528 | 5.03E-01 | 1 |

|          |         |      |     |         |         |   |    |    |   |    |     |          |          |   |
|----------|---------|------|-----|---------|---------|---|----|----|---|----|-----|----------|----------|---|
| C5orf15  | 568918  | 269  | 60  | 666076  | 194732  | 0 | 3  | 1  | 0 | 50 | 48  | 17593164 | 5.03E-01 | 1 |
| SCN3A    | 103604  | 683  | -8  | 5254204 | 1370600 | 0 | 17 | 6  | 0 | 50 | 63  | 24570764 | 5.03E-01 | 1 |
| KIF3C    | 597475  | 166  | 40  | 1993956 | 579924  | 0 | 7  | 1  | 0 | 50 | 52  | 21949536 | 5.03E-01 | 1 |
| TRIM14   | 484638  | 272  | 48  | 1112856 | 336420  | 0 | 2  | 1  | 0 | 50 | 49  | 20385272 | 5.03E-01 | 1 |
| MBIP     | 81955   | 627  | -10 | 911716  | 229976  | 0 | 3  | 0  | 0 | 50 | 60  | 23250004 | 5.03E-01 | 1 |
| COL22A1  | 5667    | 846  | -22 | 4153808 | 1332508 | 0 | 17 | 10 | 0 | 50 | 71  | 18999008 | 5.03E-01 | 1 |
| TRIM47   | 1727802 | 178  | 35  | 1558568 | 512284  | 0 | 6  | 0  | 0 | 3  | 5   | 1935216  | 5.03E-01 | 1 |
| SIM1     | 103376  | 626  | 0   | 1953372 | 546816  | 0 | 11 | 5  | 0 | 6  | 5   | 1509084  | 5.04E-01 | 1 |
| CLEC14A  | 13985   | 544  | -50 | 1172664 | 400500  | 0 | 4  | 0  | 0 | 4  | 2   | 1921688  | 5.04E-01 | 1 |
| MSL3     | 53978   | NaN  | 41  | 1443936 | 363120  | 0 | 6  | 1  | 0 | 50 | 65  | 22023228 | 5.04E-01 | 1 |
| THUMPD2  | 117341  | 739  | -8  | 1317200 | 338200  | 0 | 3  | 1  | 0 | 50 | 57  | 23301980 | 5.04E-01 | 1 |
| ITGA5    | 653663  | 190  | 42  | 2690292 | 799932  | 0 | 7  | 1  | 0 | 47 | 47  | 19516632 | 5.04E-01 | 1 |
| TNR      | 177437  | 738  | 4   | 3460676 | 983272  | 0 | 12 | 5  | 0 | 50 | 59  | 21318348 | 5.04E-01 | 1 |
| C1QA     | 389456  | 541  | 29  | 602708  | 194020  | 0 | 2  | 0  | 0 | 50 | 56  | 21614896 | 5.04E-01 | 1 |
| PACSIN3  | 1240468 | 184  | 31  | 1102176 | 297972  | 0 | 4  | 1  | 0 | 50 | 80  | 21424080 | 5.04E-01 | 1 |
| STX5     | 2405109 | 248  | 44  | 923820  | 259524  | 0 | 2  | 1  | 0 | 50 | 58  | 19762984 | 5.04E-01 | 1 |
| GSTZ1    | 554839  | 418  | 37  | 572092  | 157352  | 0 | 2  | 0  | 0 | 50 | 65  | 23475708 | 5.05E-01 | 1 |
| CARD16   | NaN     | NaN  | NaN | 538984  | 135992  | 0 | 2  | 1  | 0 | 50 | 117 | 39781576 | 5.05E-01 | 1 |
| CATSPER2 | 774279  | 286  | 51  | 1414744 | 377360  | 0 | 6  | 2  | 0 | 50 | 57  | 19297692 | 5.05E-01 | 1 |
| ACAD11   | 210777  | 598  | 19  | 2042728 | 540764  | 0 | 6  | 0  | 0 | 14 | 12  | 5685320  | 5.05E-01 | 1 |
| SPINT2   | 1410213 | 301  | -1  | 650768  | 185476  | 0 | 2  | 0  | 0 | 50 | 46  | 17588892 | 5.05E-01 | 1 |
| RPE      | 181785  | 778  | -2  | 651124  | 170168  | 0 | 1  | 0  | 0 | 50 | 33  | 21367476 | 5.05E-01 | 1 |
| MYH10    | 646488  | 488  | 10  | 5171968 | 1333220 | 0 | 19 | 5  | 0 | 4  | 7   | 2835184  | 5.05E-01 | 1 |
| HRH3     | 861466  | 288  | -13 | 1073340 | 364188  | 0 | 4  | 2  | 0 | 50 | 72  | 19241088 | 5.05E-01 | 1 |
| PFKFB1   | 244981  | NaN  | 0   | 1244576 | 325384  | 0 | 5  | 0  | 0 | 50 | 79  | 28474304 | 5.05E-01 | 1 |
| ABCE1    | 189309  | 1139 | 32  | 1594168 | 404060  | 0 | 6  | 0  | 0 | 46 | 44  | 19455756 | 5.05E-01 | 1 |
| KIAA1467 | 697100  | 196  | 7   | 1566400 | 483092  | 0 | 5  | 1  | 0 | 50 | 63  | 21337928 | 5.06E-01 | 1 |
| TIPRL    | 475438  | 391  | 16  | 742616  | 182272  | 0 | 3  | 0  | 0 | 50 | 58  | 20535148 | 5.06E-01 | 1 |
| SNAP23   | 552242  | 269  | 39  | 567464  | 141688  | 0 | 2  | 0  | 0 | 50 | 56  | 20950244 | 5.06E-01 | 1 |
| CTXN1    | 952640  | 320  | 27  | 201140  | 69064   | 0 | 1  | 0  | 0 | 50 | 74  | 20932088 | 5.06E-01 | 1 |
| ZNF334   | 416360  | 642  | 19  | 1781424 | 417588  | 0 | 6  | 1  | 0 | 50 | 53  | 17563616 | 5.06E-01 | 1 |
| CCDC80   | 255516  | 510  | 24  | 2397660 | 679248  | 0 | 6  | 2  | 0 | 28 | 31  | 12789300 | 5.06E-01 | 1 |
| ECSIT    | 1152381 | 272  | 31  | 1111076 | 302956  | 0 | 4  | 1  | 0 | 45 | 39  | 14328288 | 5.06E-01 | 1 |

|          |         |     |     |         |         |   |    |   |   |    |    |          |          |   |
|----------|---------|-----|-----|---------|---------|---|----|---|---|----|----|----------|----------|---|
| DUXA     | 311003  | 924 | -64 | 547528  | 132788  | 0 | 3  | 1 | 0 | 50 | 74 | 18807836 | 5.06E-01 | 1 |
| TSTD2    | 506644  | 420 | 36  | 1354224 | 340692  | 0 | 4  | 1 | 0 | 50 | 64 | 21883676 | 5.06E-01 | 1 |
| ZNF205   | 1626425 | 234 | 44  | 1396588 | 411536  | 0 | 5  | 0 | 0 | 13 | 10 | 4565700  | 5.06E-01 | 1 |
| SNAP25   | 168916  | 372 | -41 | 672484  | 150944  | 0 | 3  | 0 | 0 | 50 | 72 | 21416960 | 5.07E-01 | 1 |
| KIAA0430 | 538786  | 282 | 29  | 4459256 | 1239592 | 0 | 11 | 4 | 0 | 50 | 55 | 19349668 | 5.07E-01 | 1 |
| HSPA5    | 953574  | 153 | 47  | 1651484 | 477040  | 0 | 9  | 2 | 0 | 50 | 61 | 22462532 | 5.07E-01 | 1 |
| XRCC1    | 416043  | 209 | -10 | 1633684 | 468140  | 0 | 6  | 3 | 0 | 19 | 23 | 8087964  | 5.07E-01 | 1 |
| C1orf106 | 545933  | 437 | 12  | 1630124 | 537916  | 0 | 6  | 1 | 0 | 10 | 8  | 4377376  | 5.07E-01 | 1 |
| GAGE12J  | 547555  | NaN | 25  | 321112  | 76184   | 0 | 1  | 0 | 0 | 50 | 45 | 20590684 | 5.07E-01 | 1 |
| FH       | 171676  | 533 | -20 | 1304028 | 373800  | 0 | 6  | 1 | 0 | 42 | 98 | 25875860 | 5.07E-01 | 1 |
| OGT      | 749568  | NaN | 26  | 2714144 | 730156  | 0 | 6  | 1 | 0 | 40 | 72 | 27399540 | 5.08E-01 | 1 |
| SYT2     | 555792  | 497 | 34  | 1092920 | 286936  | 0 | 5  | 2 | 0 | 47 | 84 | 24751256 | 5.08E-01 | 1 |
| ARHGAP39 | 1706542 | 291 | 12  | 2789616 | 829836  | 0 | 7  | 1 | 0 | 4  | 2  | 2274840  | 5.08E-01 | 1 |
| ZNF534   | 548808  | 989 | -53 | 1743688 | 431828  | 0 | 6  | 0 | 0 | 32 | 30 | 11866192 | 5.08E-01 | 1 |
| POSTN    | 135260  | 641 | -38 | 2207200 | 568532  | 0 | 8  | 0 | 0 | 2  | 3  | 1649704  | 5.08E-01 | 1 |
| SEC14L3  | 657636  | 288 | 48  | 1060524 | 273408  | 0 | 4  | 1 | 0 | 50 | 58 | 19652624 | 5.08E-01 | 1 |
| CCDC160  | 217139  | NaN | 19  | 846924  | 199716  | 0 | 2  | 0 | 0 | 50 | 56 | 20766192 | 5.08E-01 | 1 |
| RNF103   | 621664  | 442 | 36  | 1757216 | 453544  | 0 | 3  | 0 | 0 | 11 | 10 | 6118572  | 5.08E-01 | 1 |
| SERPINB5 | 200746  | 166 | 24  | 976864  | 253472  | 0 | 3  | 1 | 0 | 50 | 43 | 19107232 | 5.08E-01 | 1 |
| TCTA     | 1585328 | 201 | 32  | 261660  | 80100   | 0 | 2  | 1 | 0 | 2  | 3  | 559988   | 5.08E-01 | 1 |
| NOMO1    | 518442  | 343 | 19  | 3153448 | 895340  | 0 | 9  | 1 | 0 | 17 | 18 | 8162724  | 5.08E-01 | 1 |
| UGT1A9   | 320853  | 284 | 24  | 1345680 | 374868  | 0 | 2  | 0 | 0 | 20 | 18 | 9508760  | 5.08E-01 | 1 |
| HMSD     | 114875  | 671 | 26  | 367392  | 93984   | 0 | 1  | 0 | 0 | 50 | 39 | 19658676 | 5.08E-01 | 1 |
| TESK2    | 902221  | 176 | 27  | 1448564 | 426844  | 0 | 5  | 1 | 0 | 50 | 72 | 23250360 | 5.08E-01 | 1 |
| NAMPT    | 246330  | 370 | 27  | 1286228 | 332860  | 0 | 4  | 0 | 0 | 50 | 43 | 21194816 | 5.08E-01 | 1 |
| ADORA1   | 469029  | 453 | 37  | 806340  | 249912  | 0 | 4  | 0 | 0 | 50 | 65 | 19729876 | 5.09E-01 | 1 |
| EREG     | 174005  | 402 | 7   | 445356  | 116412  | 0 | 1  | 1 | 0 | 4  | 2  | 1256324  | 5.09E-01 | 1 |
| PPP1R1C  | 197289  | 370 | 6   | 299040  | 70488   | 0 | 1  | 0 | 0 | 50 | 40 | 17058808 | 5.09E-01 | 1 |
| COX6C    | 282641  | 537 | 29  | 202208  | 54112   | 0 | 1  | 0 | 0 | 50 | 77 | 21669720 | 5.09E-01 | 1 |
| PDLIM3   | 168463  | 422 | 4   | 1088648 | 315772  | 0 | 3  | 0 | 0 | 50 | 34 | 17193020 | 5.09E-01 | 1 |
| IL17B    | 422727  | 380 | 28  | 458884  | 133856  | 0 | 1  | 0 | 0 | 50 | 43 | 19341480 | 5.09E-01 | 1 |
| CNOT3    | 735613  | 439 | -53 | 1946608 | 541832  | 0 | 9  | 3 | 0 | 18 | 36 | 7425804  | 5.09E-01 | 1 |
| HMGA1    | 1074764 | 233 | 36  | 285156  | 77964   | 0 | 1  | 0 | 0 | 50 | 48 | 16846276 | 5.09E-01 | 1 |



|           |         |      |     |         |        |   |    |   |   |    |     |          |          |   |
|-----------|---------|------|-----|---------|--------|---|----|---|---|----|-----|----------|----------|---|
| TERF2IP   | 449343  | 354  | 18  | 996444  | 293700 | 0 | 4  | 1 | 0 | 50 | 60  | 21330452 | 5.09E-01 | 1 |
| NUP62     | 1679101 | 205  | 45  | 1249204 | 430760 | 0 | 5  | 1 | 0 | 50 | 76  | 20785416 | 5.09E-01 | 1 |
| C20orf195 | 1262904 | 298  | 54  | 777148  | 251336 | 0 | 3  | 2 | 0 | 21 | 30  | 7391984  | 5.10E-01 | 1 |
| RPS9      | 717623  | 458  | -6  | 492348  | 151656 | 0 | 2  | 0 | 0 | 50 | 58  | 18028196 | 5.10E-01 | 1 |
| EGFLAM    | 159917  | 497  | -12 | 2609124 | 729444 | 0 | 14 | 1 | 0 | 3  | 14  | 4240672  | 5.10E-01 | 1 |
| FAM133B   | 744909  | 334  | 24  | 691352  | 148096 | 0 | 2  | 0 | 0 | 50 | 67  | 27513104 | 5.10E-01 | 1 |
| PLEKHA7   | 511749  | 446  | 13  | 2865088 | 825920 | 0 | 11 | 4 | 0 | 47 | 56  | 19808196 | 5.10E-01 | 1 |
| CREB3L3   | 2256881 | 244  | 42  | 1157712 | 360984 | 0 | 5  | 3 | 0 | 38 | 42  | 15813876 | 5.10E-01 | 1 |
| UBLCP1    | 126518  | 284  | 33  | 858672  | 206124 | 0 | 3  | 2 | 0 | 15 | 20  | 5484180  | 5.10E-01 | 1 |
| OR52N5    | 139577  | 922  | 2   | 802068  | 243504 | 0 | 3  | 1 | 0 | 50 | 48  | 17113632 | 5.10E-01 | 1 |
| MORC3     | 281776  | 347  | 63  | 2475624 | 606624 | 0 | 9  | 2 | 0 | 50 | 53  | 18921756 | 5.10E-01 | 1 |
| FIGLA     | 596622  | 629  | 24  | 559632  | 166608 | 0 | 2  | 0 | 0 | 50 | 44  | 16827408 | 5.10E-01 | 1 |
| IGF2BP1   | 820571  | 174  | 28  | 1500184 | 411536 | 0 | 6  | 3 | 0 | 50 | 53  | 19076972 | 5.10E-01 | 1 |
| GPR19     | 791330  | 136  | 44  | 1041656 | 295480 | 0 | 2  | 1 | 0 | 50 | 52  | 20311224 | 5.10E-01 | 1 |
| APOC4     | 1003719 | 196  | 6   | 330012  | 90780  | 0 | 1  | 0 | 0 | 50 | 42  | 17116124 | 5.10E-01 | 1 |
| ARL6IP5   | 264082  | 443  | 20  | 482024  | 132076 | 0 | 2  | 1 | 0 | 8  | 7   | 2888228  | 5.10E-01 | 1 |
| CDKL4     | 391680  | 375  | 16  | 833040  | 209328 | 0 | 1  | 0 | 0 | 50 | 61  | 22212976 | 5.11E-01 | 1 |
| FOLH1     | 11046   | 1009 | -19 | 1965120 | 517980 | 0 | 9  | 1 | 0 | 7  | 17  | 4193324  | 5.11E-01 | 1 |
| C15orf43  | 706600  | 569  | 31  | 597724  | 138128 | 0 | 2  | 0 | 0 | 50 | 70  | 25355032 | 5.11E-01 | 1 |
| OR6B3     | 315906  | 569  | 21  | 806340  | 256320 | 0 | 2  | 0 | 0 | 50 | 47  | 24388136 | 5.11E-01 | 1 |
| KCNN3     | 1958370 | 559  | 34  | 1852980 | 543612 | 0 | 5  | 3 | 0 | 50 | 49  | 18763336 | 5.11E-01 | 1 |
| TMEM116   | 816439  | 317  | 43  | 642224  | 175864 | 0 | 1  | 1 | 0 | 50 | 60  | 21025004 | 5.11E-01 | 1 |
| SEC24D    | 248929  | 623  | 24  | 2667508 | 736208 | 0 | 6  | 2 | 0 | 35 | 30  | 15255312 | 5.11E-01 | 1 |
| CCDC66    | 178940  | 477  | 24  | 2523684 | 595944 | 0 | 5  | 2 | 0 | 50 | 33  | 17933144 | 5.11E-01 | 1 |
| VPS33A    | 885125  | 222  | 47  | 1539344 | 424708 | 0 | 7  | 3 | 0 | 4  | 13  | 4742632  | 5.11E-01 | 1 |
| ACBD6     | 543108  | 445  | 12  | 739056  | 197580 | 0 | 3  | 0 | 0 | 26 | 23  | 9718800  | 5.11E-01 | 1 |
| KIFC1     | 1441897 | 236  | 31  | 1668928 | 533288 | 0 | 7  | 2 | 0 | 50 | 72  | 19862664 | 5.11E-01 | 1 |
| TM4SF4    | 558016  | 159  | 6   | 521184  | 146316 | 0 | 2  | 0 | 0 | 50 | 60  | 20498480 | 5.11E-01 | 1 |
| KIR3DL3   | 1155455 | 625  | -10 | 1041300 | 307584 | 0 | 3  | 0 | 0 | 3  | 2   | 1551448  | 5.11E-01 | 1 |
| ATP13A2   | 678965  | 221  | 52  | 3175876 | 981848 | 0 | 11 | 2 | 0 | 25 | 22  | 10637992 | 5.12E-01 | 1 |
| CDIPT     | NaN     | NaN  | NaN | 545392  | 161624 | 0 | 2  | 0 | 0 | 50 | 116 | 39807208 | 5.12E-01 | 1 |
| GRAMD1C   | 442573  | 363  | 36  | 1757572 | 441440 | 0 | 7  | 1 | 0 | 20 | 17  | 8206156  | 5.12E-01 | 1 |
| DPP4      | 153730  | 528  | 9   | 2068360 | 495908 | 0 | 9  | 0 | 0 | 8  | 20  | 5836620  | 5.12E-01 | 1 |

|          |         |      |     |         |         |   |    |   |   |    |     |          |          |   |
|----------|---------|------|-----|---------|---------|---|----|---|---|----|-----|----------|----------|---|
| ZNF326   | 176748  | 215  | 12  | 1542192 | 374868  | 0 | 3  | 1 | 0 | 50 | 59  | 20023576 | 5.12E-01 | 1 |
| DPH3     | 205091  | 437  | 26  | 223568  | 50908   | 0 | 1  | 0 | 0 | 50 | 61  | 18386332 | 5.12E-01 | 1 |
| KRT15    | 1445853 | 325  | -22 | 1153440 | 340692  | 0 | 5  | 2 | 0 | 50 | 58  | 19098688 | 5.12E-01 | 1 |
| ELF4     | 384451  | NaN  | 48  | 1632260 | 525100  | 0 | 5  | 2 | 0 | 50 | 70  | 23957732 | 5.12E-01 | 1 |
| OR2A12   | 222080  | 812  | -11 | 767180  | 228196  | 0 | 4  | 3 | 0 | 9  | 13  | 2789616  | 5.12E-01 | 1 |
| MEM132A  | 798818  | 512  | 52  | 2457112 | 869708  | 0 | 8  | 0 | 0 | 13 | 8   | 4255624  | 5.12E-01 | 1 |
| LTB      | 2517285 | 220  | 35  | 608048  | 191884  | 0 | 2  | 0 | 0 | 50 | 55  | 21824936 | 5.12E-01 | 1 |
| ANKRD34F | 321394  | 545  | 38  | 1287652 | 366680  | 0 | 5  | 2 | 0 | 39 | 38  | 14607036 | 5.12E-01 | 1 |
| EMB      | 72996   | 1229 | -3  | 866860  | 218228  | 0 | 2  | 0 | 0 | 50 | 37  | 19144256 | 5.12E-01 | 1 |
| GXYLT2   | 144572  | 420  | 14  | 1123536 | 324672  | 0 | 5  | 1 | 0 | 50 | 58  | 19788260 | 5.13E-01 | 1 |
| FAM71C   | 100701  | 906  | 0   | 611964  | 167676  | 0 | 2  | 0 | 0 | 50 | 50  | 19840236 | 5.13E-01 | 1 |
| MAP3K4   | 80018   | 860  | -2  | 4162352 | 1103956 | 0 | 17 | 2 | 0 | 50 | 68  | 23205860 | 5.13E-01 | 1 |
| AQP4     | 65361   | 639  | -33 | 819868  | 239588  | 0 | 5  | 0 | 0 | 50 | 81  | 21907884 | 5.13E-01 | 1 |
| TBC1D10C | 1269888 | 177  | 51  | 1105380 | 365256  | 0 | 3  | 1 | 0 | 31 | 22  | 11381320 | 5.13E-01 | 1 |
| STX4     | 1398193 | 247  | 40  | 790676  | 206836  | 0 | 3  | 1 | 0 | 50 | 79  | 26328336 | 5.13E-01 | 1 |
| CYLC2    | 13384   | 1215 | -31 | 926312  | 211108  | 0 | 5  | 0 | 0 | 50 | 105 | 25680416 | 5.13E-01 | 1 |
| RNF4     | 816930  | 179  | 39  | 533644  | 103952  | 0 | 2  | 0 | 0 | 50 | 48  | 16896472 | 5.13E-01 | 1 |
| SF3A3    | 445132  | 232  | 42  | 1358140 | 318620  | 0 | 4  | 1 | 0 | 50 | 34  | 17924600 | 5.13E-01 | 1 |
| FEZ1     | 363322  | 629  | 21  | 1041656 | 258100  | 0 | 2  | 0 | 0 | 50 | 49  | 18911788 | 5.13E-01 | 1 |
| GPM6A    | 123418  | 931  | -23 | 734784  | 195444  | 0 | 3  | 2 | 0 | 9  | 22  | 3607704  | 5.13E-01 | 1 |
| FANCC    | 165520  | 457  | 38  | 1449988 | 400856  | 0 | 7  | 1 | 0 | 50 | 76  | 24964500 | 5.13E-01 | 1 |
| NFIC     | 2180542 | 222  | 37  | 1296908 | 386260  | 0 | 2  | 1 | 0 | 50 | 52  | 23783648 | 5.13E-01 | 1 |
| SLC25A36 | 209562  | 727  | 18  | 788896  | 236384  | 0 | 1  | 1 | 0 | 50 | 57  | 20338636 | 5.13E-01 | 1 |
| OR51L1   | 97256   | 1024 | -11 | 767180  | 243148  | 0 | 3  | 0 | 0 | 50 | 75  | 25324772 | 5.13E-01 | 1 |
| SHC1     | 1612870 | 224  | 35  | 1470636 | 450696  | 0 | 5  | 2 | 0 | 50 | 56  | 18488504 | 5.13E-01 | 1 |
| PDE1A    | 359828  | 401  | -5  | 1489148 | 373444  | 0 | 7  | 1 | 0 | 7  | 9   | 3027424  | 5.14E-01 | 1 |
| NFATC3   | 882378  | 152  | 43  | 2869004 | 862588  | 0 | 8  | 1 | 0 | 29 | 34  | 14862288 | 5.14E-01 | 1 |
| C9orf16  | 1762678 | 201  | 44  | 214668  | 58740   | 0 | 1  | 0 | 0 | 50 | 65  | 19259600 | 5.14E-01 | 1 |
| DENR     | 1042095 | 227  | 42  | 543968  | 123532  | 0 | 2  | 1 | 0 | 20 | 20  | 7505904  | 5.14E-01 | 1 |
| OR6M1    | 92984   | 637  | -1  | 764332  | 240656  | 0 | 5  | 3 | 0 | 4  | 3   | 960488   | 5.14E-01 | 1 |
| NUSAP1   | 897414  | 237  | 24  | 1153440 | 305448  | 0 | 6  | 1 | 0 | 50 | 50  | 15496680 | 5.14E-01 | 1 |
| CBR1     | 219580  | 318  | 66  | 690996  | 208260  | 0 | 2  | 1 | 0 | 50 | 70  | 20787908 | 5.14E-01 | 1 |
| ZNF804B  | 3101    | 1030 | -20 | 3443232 | 892848  | 0 | 13 | 2 | 0 | 15 | 11  | 5157016  | 5.14E-01 | 1 |

|          |         |      |     |         |         |   |    |   |   |    |    |          |          |   |
|----------|---------|------|-----|---------|---------|---|----|---|---|----|----|----------|----------|---|
| PPP4R2   | 128046  | 483  | 17  | 1104312 | 271272  | 0 | 2  | 1 | 0 | 50 | 49 | 20149956 | 5.14E-01 | 1 |
| TMPRSS12 | 594068  | 250  | 43  | 884304  | 253116  | 0 | 3  | 1 | 0 | 35 | 34 | 15024268 | 5.14E-01 | 1 |
| SEMA3A   | 61350   | 601  | -27 | 2032404 | 509436  | 0 | 10 | 3 | 0 | 50 | 91 | 20761920 | 5.14E-01 | 1 |
| GNRH2    | 835590  | 288  | 54  | 304380  | 98256   | 0 | 1  | 1 | 0 | 12 | 13 | 2338920  | 5.14E-01 | 1 |
| WWP1     | 193108  | 1112 | -6  | 2438956 | 616592  | 0 | 4  | 0 | 0 | 27 | 17 | 11045968 | 5.14E-01 | 1 |
| WDR20    | 1492356 | 237  | 43  | 1493420 | 421504  | 0 | 6  | 2 | 0 | 25 | 42 | 12994712 | 5.14E-01 | 1 |
| FGFBP2   | 175145  | 435  | 33  | 557852  | 164116  | 0 | 2  | 0 | 0 | 37 | 55 | 19726316 | 5.14E-01 | 1 |
| SLFN5    | 753178  | 505  | 16  | 2253480 | 621576  | 0 | 9  | 0 | 0 | 2  | 1  | 1459244  | 5.15E-01 | 1 |
| MAP1LC3C | 172086  | 419  | -12 | 388040  | 101104  | 0 | 1  | 0 | 0 | 50 | 57 | 23588916 | 5.15E-01 | 1 |
| MS4A6E   | 433906  | 899  | 24  | 375936  | 113208  | 0 | 1  | 0 | 0 | 50 | 36 | 18309436 | 5.15E-01 | 1 |
| U2AF1L4  | 1151198 | 321  | 30  | 623712  | 114276  | 0 | 2  | 0 | 0 | 50 | 47 | 19100468 | 5.15E-01 | 1 |
| SDR16C5  | 435368  | 613  | -7  | 802424  | 216448  | 0 | 3  | 1 | 0 | 50 | 41 | 14552212 | 5.15E-01 | 1 |
| IK       | 774470  | 356  | 31  | 1515492 | 353508  | 0 | 4  | 0 | 0 | 19 | 25 | 9696372  | 5.15E-01 | 1 |
| CA2      | 100997  | 1460 | -18 | 682096  | 179780  | 0 | 2  | 1 | 0 | 19 | 17 | 8272016  | 5.15E-01 | 1 |
| MAP4     | 1023686 | 249  | 35  | 4025648 | 1203280 | 0 | 9  | 1 | 0 | 8  | 10 | 5237828  | 5.15E-01 | 1 |
| SPINK2   | 595179  | 572  | 12  | 225704  | 61588   | 0 | 1  | 0 | 0 | 50 | 65 | 20162772 | 5.15E-01 | 1 |
| TIAF1    | 1586181 | 236  | 33  | 280528  | 91136   | 0 | 1  | 0 | 0 | 50 | 54 | 20950244 | 5.15E-01 | 1 |
| STX6     | 217489  | 398  | 22  | 678892  | 171236  | 0 | 2  | 0 | 0 | 50 | 51 | 19719908 | 5.15E-01 | 1 |
| CDKL2    | 485383  | 451  | 31  | 1303316 | 326452  | 0 | 4  | 0 | 0 | 15 | 11 | 6447160  | 5.15E-01 | 1 |
| VN1R2    | 427680  | 921  | -46 | 982560  | 290496  | 0 | 3  | 1 | 0 | 50 | 59 | 17329368 | 5.15E-01 | 1 |
| TFCP2L1  | 240173  | 568  | 9   | 1265936 | 333928  | 0 | 3  | 1 | 0 | 50 | 58 | 22422304 | 5.15E-01 | 1 |
| PGLYRP1  | 997099  | 261  | 31  | 492704  | 149164  | 0 | 2  | 1 | 0 | 14 | 17 | 5940216  | 5.15E-01 | 1 |
| HHIPL1   | 375738  | 250  | 21  | 2022080 | 628696  | 0 | 5  | 2 | 0 | 37 | 38 | 16980844 | 5.15E-01 | 1 |
| MAPK9    | 1623084 | 362  | 25  | 1229980 | 306872  | 0 | 4  | 0 | 0 | 32 | 34 | 10649028 | 5.16E-01 | 1 |
| OR8D1    | 154391  | 921  | -14 | 757568  | 231400  | 0 | 4  | 1 | 0 | 8  | 10 | 3157720  | 5.16E-01 | 1 |
| ICT1     | 1111289 | 171  | 31  | 543612  | 143112  | 0 | 4  | 2 | 0 | 5  | 6  | 1244576  | 5.16E-01 | 1 |
| ADAP2    | 594135  | 209  | 20  | 1004988 | 261660  | 0 | 2  | 1 | 0 | 50 | 57 | 19186976 | 5.16E-01 | 1 |
| SBNO2    | 2398425 | 234  | 17  | 3550744 | 1076900 | 0 | 5  | 3 | 0 | 50 | 57 | 27012212 | 5.16E-01 | 1 |
| GABRB3   | 21132   | 1430 | -54 | 1280888 | 361696  | 0 | 7  | 1 | 0 | 13 | 29 | 6781800  | 5.16E-01 | 1 |
| PRDM14   | 268840  | 727  | 10  | 1464584 | 398008  | 0 | 5  | 0 | 0 | 50 | 66 | 20633760 | 5.16E-01 | 1 |
| ALKBH5   | 918230  | 192  | 23  | 979000  | 299396  | 0 | 5  | 1 | 0 | 50 | 73 | 17814952 | 5.16E-01 | 1 |
| PRKG2    | 10566   | 894  | -1  | 1999652 | 519760  | 0 | 7  | 2 | 0 | 25 | 29 | 11126424 | 5.16E-01 | 1 |
| DHDH     | 1927185 | 211  | 43  | 848704  | 254540  | 0 | 3  | 1 | 0 | 50 | 57 | 20562560 | 5.16E-01 | 1 |

|          |         |      |     |         |        |   |    |   |   |    |     |          |          |   |
|----------|---------|------|-----|---------|--------|---|----|---|---|----|-----|----------|----------|---|
| SMAD9    | 189427  | 731  | 7   | 1187260 | 333572 | 0 | 3  | 1 | 0 | 50 | 72  | 23943848 | 5.17E-01 | 1 |
| FLRT3    | NaN     | NaN  | NaN | 1612680 | 474192 | 0 | 6  | 2 | 0 | 50 | 118 | 40119776 | 5.17E-01 | 1 |
| OSTM1    | 303865  | 459  | 38  | 857248  | 239588 | 0 | 2  | 0 | 0 | 50 | 55  | 16635168 | 5.17E-01 | 1 |
| NUDCD1   | 134762  | 731  | 17  | 1555720 | 391244 | 0 | 4  | 0 | 0 | 14 | 11  | 5293720  | 5.17E-01 | 1 |
| CPEB1    | 567143  | 566  | 19  | 1456396 | 410468 | 0 | 7  | 1 | 0 | 12 | 13  | 5114652  | 5.17E-01 | 1 |
| RNF138   | 409393  | 481  | 23  | 661092  | 159132 | 0 | 2  | 0 | 0 | 50 | 67  | 28936392 | 5.17E-01 | 1 |
| TLE6     | 1119793 | 197  | 35  | 1500896 | 403348 | 0 | 2  | 2 | 0 | 32 | 37  | 13356764 | 5.17E-01 | 1 |
| C3orf36  | 548078  | 520  | 28  | 389464  | 142400 | 0 | 2  | 1 | 0 | 12 | 23  | 6107892  | 5.17E-01 | 1 |
| IL27RA   | 1013197 | 231  | 32  | 1601288 | 495196 | 0 | 4  | 3 | 0 | 8  | 10  | 3617672  | 5.17E-01 | 1 |
| C12orf50 | 152672  | 507  | -36 | 1119264 | 257388 | 0 | 6  | 1 | 0 | 25 | 36  | 10138524 | 5.17E-01 | 1 |
| KEAP1    | 1996822 | 207  | 30  | 1569960 | 453900 | 0 | 6  | 3 | 0 | 50 | 70  | 19094772 | 5.17E-01 | 1 |
| C4orf27  | 173367  | 574  | 17  | 919904  | 223924 | 0 | 3  | 0 | 0 | 50 | 38  | 15814588 | 5.17E-01 | 1 |
| AGTR1    | 271257  | 825  | -24 | 898544  | 259168 | 0 | 3  | 2 | 0 | 50 | 74  | 18613460 | 5.17E-01 | 1 |
| ZNF808   | 546511  | 1005 | -53 | 2328596 | 580636 | 0 | 9  | 2 | 0 | 29 | 27  | 10802108 | 5.17E-01 | 1 |
| CPNE1    | 1423559 | 169  | 53  | 1574944 | 444644 | 0 | 7  | 2 | 0 | 50 | 53  | 18644076 | 5.18E-01 | 1 |
| SGOL2    | 555530  | 248  | 24  | 3336076 | 760772 | 0 | 10 | 0 | 0 | 5  | 2   | 2099332  | 5.18E-01 | 1 |
| NQO2     | 430294  | 268  | 42  | 608048  | 160912 | 0 | 2  | 0 | 0 | 45 | 45  | 18149948 | 5.18E-01 | 1 |
| OR52E4   | 262387  | 914  | -13 | 769316  | 231400 | 0 | 3  | 0 | 0 | 50 | 51  | 17452900 | 5.18E-01 | 1 |
| BARX1    | 448425  | 479  | 25  | 626204  | 203632 | 0 | 1  | 0 | 0 | 14 | 13  | 5185496  | 5.18E-01 | 1 |
| IL3RA    | NaN     | NaN  | NaN | 1027416 | 270204 | 0 | 4  | 3 | 0 | 8  | 19  | 4196172  | 5.18E-01 | 1 |
| BMP3     | 10953   | 1083 | 4   | 1181208 | 342828 | 0 | 3  | 0 | 0 | 33 | 26  | 13786812 | 5.18E-01 | 1 |
| HAP1     | 1617880 | 323  | 9   | 1594880 | 462088 | 0 | 4  | 2 | 0 | 23 | 22  | 9524424  | 5.18E-01 | 1 |
| HMGCS2   | 420500  | 581  | 22  | 1294416 | 377004 | 0 | 6  | 0 | 0 | 50 | 70  | 22730956 | 5.18E-01 | 1 |
| OTOL1    | 236814  | 792  | -13 | 1192956 | 349236 | 0 | 4  | 1 | 0 | 50 | 65  | 18764404 | 5.18E-01 | 1 |
| TLCD1    | 1695792 | 208  | 40  | 661804  | 204344 | 0 | 3  | 1 | 0 | 38 | 64  | 19088364 | 5.18E-01 | 1 |
| SERPINB4 | 174293  | 370  | -5  | 1032044 | 250624 | 0 | 3  | 2 | 0 | 9  | 11  | 4391972  | 5.18E-01 | 1 |
| NKAIN1   | 586763  | 234  | 28  | 540764  | 151300 | 0 | 1  | 0 | 0 | 50 | 93  | 24549048 | 5.18E-01 | 1 |
| ZNF599   | 932476  | 607  | -52 | 1513000 | 386972 | 0 | 10 | 1 | 0 | 50 | 132 | 30538036 | 5.18E-01 | 1 |
| SH3GL3   | 179993  | 757  | -3  | 919904  | 229264 | 0 | 3  | 0 | 0 | 50 | 44  | 21730240 | 5.18E-01 | 1 |
| MFAP1    | 788307  | 250  | 36  | 1159492 | 284444 | 0 | 5  | 1 | 0 | 50 | 65  | 23012908 | 5.18E-01 | 1 |
| POLN     | 765279  | 332  | 34  | 2362060 | 623000 | 0 | 8  | 2 | 0 | 50 | 49  | 21406992 | 5.18E-01 | 1 |
| TMIE     | 298503  | 495  | 41  | 400500  | 115344 | 0 | 2  | 0 | 0 | 50 | 70  | 18972664 | 5.19E-01 | 1 |
| CXXC5    | 659730  | 244  | 42  | 790320  | 248844 | 0 | 1  | 0 | 0 | 47 | 60  | 22577520 | 5.19E-01 | 1 |

|         |         |      |     |         |         |   |    |   |   |    |     |          |          |   |
|---------|---------|------|-----|---------|---------|---|----|---|---|----|-----|----------|----------|---|
| INTS9   | 396951  | 403  | 42  | 1709868 | 476328  | 0 | 5  | 1 | 0 | 50 | 45  | 23805720 | 5.19E-01 | 1 |
| OR5AU1  | 730598  | 357  | 36  | 892848  | 269136  | 0 | 3  | 0 | 0 | 20 | 18  | 8578888  | 5.19E-01 | 1 |
| PSMB2   | 1113527 | 325  | 34  | 525812  | 142756  | 0 | 2  | 0 | 0 | 50 | 52  | 17637308 | 5.19E-01 | 1 |
| ITK     | 266925  | 1180 | 30  | 1639736 | 420436  | 0 | 4  | 0 | 0 | 50 | 34  | 21714576 | 5.19E-01 | 1 |
| OTUD6A  | 166632  | NaN  | 16  | 725884  | 202208  | 0 | 3  | 3 | 0 | 10 | 6   | 2726604  | 5.19E-01 | 1 |
| ESRRA   | 1613996 | 257  | 65  | 1035960 | 348168  | 0 | 3  | 0 | 0 | 36 | 53  | 16019644 | 5.19E-01 | 1 |
| GLI3    | 41720   | 589  | -12 | 3958008 | 1167324 | 0 | 17 | 6 | 0 | 30 | 48  | 15405900 | 5.19E-01 | 1 |
| GRINA   | 2580629 | 247  | 28  | 935212  | 282308  | 0 | 3  | 0 | 0 | 50 | 62  | 28229376 | 5.19E-01 | 1 |
| SOX14   | 85683   | 880  | -2  | 590604  | 185832  | 0 | 2  | 0 | 0 | 50 | 62  | 22060964 | 5.19E-01 | 1 |
| TSEN54  | 1907659 | 195  | 31  | 1338560 | 394804  | 0 | 4  | 1 | 0 | 50 | 90  | 21830276 | 5.19E-01 | 1 |
| MCCD1   | 2514366 | 220  | 34  | 300464  | 90424   | 0 | 1  | 0 | 0 | 50 | 60  | 23287028 | 5.19E-01 | 1 |
| ETV5    | 780547  | 397  | 36  | 1329660 | 358848  | 0 | 3  | 2 | 0 | 50 | 63  | 24114728 | 5.20E-01 | 1 |
| PGRMC1  | 613514  | NaN  | 19  | 491280  | 145248  | 0 | 1  | 1 | 0 | 50 | 40  | 17974796 | 5.20E-01 | 1 |
| PIWIL2  | 635115  | 144  | 37  | 2523684 | 690996  | 0 | 7  | 0 | 0 | 2  | 2   | 1465296  | 5.20E-01 | 1 |
| ATG2B   | 327434  | 501  | 14  | 5377380 | 1458888 | 0 | 16 | 4 | 0 | 35 | 44  | 16091200 | 5.20E-01 | 1 |
| WWTR1   | 558006  | 263  | 18  | 1021720 | 288716  | 0 | 4  | 1 | 0 | 50 | 56  | 21033548 | 5.20E-01 | 1 |
| CAPN13  | 131345  | 692  | 5   | 1785696 | 454968  | 0 | 6  | 2 | 0 | 50 | 61  | 24046020 | 5.20E-01 | 1 |
| NDST4   | 26862   | 1055 | -20 | 2249920 | 600572  | 0 | 10 | 3 | 0 | 50 | 72  | 20288440 | 5.20E-01 | 1 |
| DPP8    | 620582  | 187  | 39  | 2362416 | 603420  | 0 | 7  | 2 | 0 | 50 | 43  | 20303392 | 5.20E-01 | 1 |
| EIF4E   | 225403  | 415  | 11  | 731224  | 184052  | 0 | 2  | 0 | 0 | 50 | 48  | 22352528 | 5.20E-01 | 1 |
| BEST3   | 499701  | 394  | 14  | 1710580 | 471344  | 0 | 8  | 3 | 0 | 19 | 19  | 7571408  | 5.20E-01 | 1 |
| FRG2B   | 50016   | 525  | -16 | 709864  | 197936  | 0 | 3  | 1 | 0 | 48 | 72  | 21755872 | 5.20E-01 | 1 |
| AMPD1   | 600650  | 472  | 11  | 2051272 | 519404  | 0 | 9  | 1 | 0 | 6  | 5   | 2131728  | 5.20E-01 | 1 |
| ZNF716  | NaN     | NaN  | NaN | 1286228 | 315772  | 0 | 5  | 2 | 0 | 50 | 118 | 39961356 | 5.20E-01 | 1 |
| IFNA2   | 232155  | 466  | -14 | 478464  | 129228  | 0 | 1  | 0 | 0 | 50 | 45  | 18385976 | 5.20E-01 | 1 |
| ARMCX2  | 300391  | NaN  | 31  | 1525104 | 503028  | 0 | 5  | 1 | 0 | 50 | 58  | 25085896 | 5.20E-01 | 1 |
| EFCAB5  | 652131  | 303  | 15  | 4069436 | 1019584 | 0 | 18 | 1 | 0 | 2  | 2   | 1282668  | 5.20E-01 | 1 |
| GABRQ   | 203033  | NaN  | -1  | 1620512 | 446068  | 0 | 5  | 2 | 0 | 50 | 57  | 23840964 | 5.20E-01 | 1 |
| TOR1B   | 600401  | 187  | 44  | 855468  | 243504  | 0 | 2  | 0 | 0 | 50 | 71  | 21419808 | 5.20E-01 | 1 |
| FAM101A | 1197100 | 504  | 34  | 340692  | 103596  | 0 | 2  | 1 | 0 | 2  | 2   | 602352   | 5.20E-01 | 1 |
| C9orf3  | 250013  | 432  | 35  | 1862592 | 503028  | 0 | 8  | 1 | 0 | 50 | 54  | 19833116 | 5.21E-01 | 1 |
| TRIM9   | 373925  | 516  | 17  | 1846572 | 521184  | 0 | 5  | 2 | 0 | 50 | 66  | 24314088 | 5.21E-01 | 1 |
| TGM4    | 466410  | 380  | 31  | 1780712 | 471700  | 0 | 8  | 2 | 0 | 50 | 53  | 18679320 | 5.21E-01 | 1 |

|          |         |     |     |         |         |   |    |   |   |    |    |          |          |   |
|----------|---------|-----|-----|---------|---------|---|----|---|---|----|----|----------|----------|---|
| PGS1     | 980896  | 209 | 26  | 1394808 | 430404  | 0 | 3  | 0 | 0 | 18 | 29 | 8859772  | 5.21E-01 | 1 |
| ZNF557   | 748801  | 470 | 21  | 1122112 | 284444  | 0 | 4  | 2 | 0 | 50 | 64 | 18326524 | 5.21E-01 | 1 |
| WDR59    | 724091  | 165 | 28  | 2545044 | 687792  | 0 | 4  | 3 | 0 | 41 | 38 | 18668996 | 5.21E-01 | 1 |
| CD33     | 352763  | 629 | 1   | 929516  | 279460  | 0 | 4  | 2 | 0 | 50 | 65 | 22440104 | 5.21E-01 | 1 |
| TRPC7    | 283872  | 588 | 23  | 2212184 | 599860  | 0 | 7  | 2 | 0 | 50 | 53 | 25081624 | 5.21E-01 | 1 |
| TTC30A   | 380902  | 434 | 27  | 1664300 | 469564  | 0 | 4  | 0 | 0 | 39 | 31 | 17848416 | 5.21E-01 | 1 |
| SHB      | 486918  | 551 | 16  | 1269496 | 385904  | 0 | 3  | 1 | 0 | 44 | 52 | 17428692 | 5.21E-01 | 1 |
| OR13C2   | 147494  | 920 | -31 | 793880  | 227128  | 0 | 5  | 3 | 0 | 10 | 11 | 2804924  | 5.22E-01 | 1 |
| GPD2     | 116871  | 496 | 10  | 1885376 | 515488  | 0 | 6  | 1 | 0 | 25 | 36 | 12341452 | 5.22E-01 | 1 |
| TMEM59L  | 1397040 | 222 | 33  | 868996  | 262016  | 0 | 1  | 2 | 0 | 49 | 52 | 19848424 | 5.22E-01 | 1 |
| RUSC1    | 1668953 | 177 | 44  | 2317204 | 760772  | 0 | 11 | 7 | 0 | 6  | 15 | 2951596  | 5.22E-01 | 1 |
| CASD1    | 446033  | 469 | 3   | 2101824 | 527592  | 0 | 4  | 1 | 0 | 50 | 46 | 18769032 | 5.22E-01 | 1 |
| HLA-DRB5 | 1070559 | 595 | 14  | 687080  | 191884  | 0 | 1  | 0 | 0 | 50 | 75 | 22719564 | 5.22E-01 | 1 |
| ZNF565   | 950699  | 326 | -10 | 1295128 | 323960  | 0 | 7  | 0 | 0 | 50 | 52 | 17608116 | 5.22E-01 | 1 |
| CACNA1F  | 724395  | NaN | 44  | 5079764 | 1462804 | 0 | 11 | 2 | 0 | 16 | 16 | 8111460  | 5.22E-01 | 1 |
| PPTC7    | 890955  | 144 | 38  | 772520  | 226060  | 0 | 3  | 0 | 0 | 50 | 61 | 20817100 | 5.22E-01 | 1 |
| SOAT1    | 437024  | 336 | 3   | 1457464 | 372020  | 0 | 5  | 1 | 0 | 50 | 52 | 21333656 | 5.22E-01 | 1 |
| OCLN     | 502559  | 312 | 32  | 1352800 | 357068  | 0 | 4  | 1 | 0 | 50 | 39 | 16974436 | 5.22E-01 | 1 |
| MATK     | 2172842 | 204 | 36  | 1361344 | 404060  | 0 | 4  | 2 | 0 | 50 | 49 | 23587492 | 5.22E-01 | 1 |
| PIK3CB   | 281611  | 424 | 26  | 2801364 | 717696  | 0 | 6  | 2 | 0 | 43 | 46 | 18444004 | 5.22E-01 | 1 |
| IGLON5   | 368509  | 610 | -9  | 838380  | 271272  | 0 | 3  | 0 | 0 | 50 | 39 | 14321524 | 5.22E-01 | 1 |
| OR9K2    | 341315  | 828 | -2  | 826988  | 248488  | 0 | 2  | 2 | 0 | 42 | 52 | 16635880 | 5.22E-01 | 1 |
| CPA6     | 232126  | 890 | 15  | 1150592 | 295480  | 0 | 8  | 2 | 0 | 22 | 35 | 9241404  | 5.23E-01 | 1 |
| RAPGEF6  | 314836  | 627 | 30  | 4582432 | 1180496 | 0 | 11 | 2 | 0 | 25 | 27 | 10521936 | 5.23E-01 | 1 |
| ACADS    | 1741363 | 349 | 42  | 1050200 | 311500  | 0 | 6  | 2 | 0 | 43 | 52 | 12767228 | 5.23E-01 | 1 |
| COQ10B   | 681973  | 428 | 29  | 609472  | 175508  | 0 | 2  | 1 | 0 | 50 | 49 | 19314780 | 5.23E-01 | 1 |
| SRR      | 780080  | 271 | 29  | 866148  | 256320  | 0 | 3  | 2 | 0 | 17 | 24 | 9019972  | 5.23E-01 | 1 |
| FAM50B   | 271690  | 208 | 30  | 818444  | 230332  | 0 | 4  | 2 | 0 | 23 | 30 | 9160236  | 5.23E-01 | 1 |
| RHPN1    | 1882843 | 237 | 35  | 1680320 | 529372  | 0 | 6  | 1 | 0 | 50 | 67 | 21836684 | 5.23E-01 | 1 |
| CHRNA10  | 537999  | 403 | 23  | 1089360 | 374868  | 0 | 4  | 1 | 0 | 50 | 51 | 22444732 | 5.23E-01 | 1 |
| TBCE     | 531741  | 178 | 21  | 1388756 | 371308  | 0 | 6  | 2 | 0 | 50 | 56 | 19303744 | 5.23E-01 | 1 |
| OR52B6   | 128694  | 895 | 9   | 819512  | 254896  | 0 | 3  | 0 | 0 | 50 | 58 | 21404856 | 5.23E-01 | 1 |
| NUB1     | 604407  | 282 | 42  | 1584556 | 404060  | 0 | 4  | 0 | 0 | 20 | 17 | 9787864  | 5.23E-01 | 1 |

|         |         |     |     |         |         |   |    |   |   |    |     |          |          |   |
|---------|---------|-----|-----|---------|---------|---|----|---|---|----|-----|----------|----------|---|
| ANKRD28 | 345831  | 435 | 29  | 2741912 | 750448  | 0 | 8  | 2 | 0 | 18 | 14  | 7942004  | 5.23E-01 | 1 |
| TMEM190 | 1028808 | 209 | 19  | 461732  | 129940  | 0 | 2  | 0 | 0 | 3  | 0   | 758992   | 5.23E-01 | 1 |
| DRG1    | 737051  | 237 | 38  | 948384  | 264864  | 0 | 4  | 1 | 0 | 29 | 35  | 12516604 | 5.24E-01 | 1 |
| NLRP3   | 293118  | 825 | -17 | 2651132 | 709864  | 0 | 11 | 6 | 0 | 29 | 29  | 8739800  | 5.24E-01 | 1 |
| PPM1K   | 432936  | 304 | 25  | 955148  | 265576  | 0 | 4  | 1 | 0 | 50 | 49  | 16500956 | 5.24E-01 | 1 |
| RNF121  | 737476  | 311 | 53  | 860808  | 224280  | 0 | 3  | 2 | 0 | 33 | 20  | 8285900  | 5.24E-01 | 1 |
| CCDC27  | 249153  | 341 | 24  | 1705596 | 448560  | 0 | 8  | 4 | 0 | 14 | 20  | 6017824  | 5.24E-01 | 1 |
| DSC1    | 214084  | 492 | -7  | 2353516 | 623000  | 0 | 8  | 3 | 0 | 35 | 31  | 14424764 | 5.24E-01 | 1 |
| RTN1    | 298900  | 639 | -2  | 1982564 | 610540  | 0 | 6  | 1 | 0 | 49 | 46  | 17808544 | 5.24E-01 | 1 |
| TNNC1   | 1078407 | 229 | 62  | 446780  | 95764   | 0 | 2  | 1 | 0 | 11 | 14  | 4151672  | 5.24E-01 | 1 |
| FANK1   | 207005  | 738 | -8  | 907800  | 243504  | 0 | 3  | 1 | 0 | 42 | 47  | 18364616 | 5.24E-01 | 1 |
| AMH     | 1603571 | 240 | 27  | 1298688 | 515844  | 0 | 2  | 0 | 0 | 11 | 6   | 4169472  | 5.24E-01 | 1 |
| BTG3    | 101069  | 479 | -5  | 771096  | 201852  | 0 | 1  | 0 | 0 | 50 | 70  | 23406644 | 5.25E-01 | 1 |
| SH2B1   | 1146511 | 221 | 56  | 1987548 | 639732  | 0 | 6  | 3 | 0 | 16 | 35  | 10080852 | 5.25E-01 | 1 |
| NSDHL   | 211215  | NaN | 5   | 957640  | 270560  | 0 | 3  | 0 | 0 | 50 | 55  | 23944204 | 5.25E-01 | 1 |
| MRGPRE  | 583782  | 421 | 36  | 740836  | 265220  | 0 | 3  | 2 | 0 | 9  | 11  | 4180152  | 5.25E-01 | 1 |
| MYLIP   | 159273  | 596 | 27  | 1145252 | 309364  | 0 | 3  | 1 | 0 | 50 | 47  | 22634124 | 5.26E-01 | 1 |
| PRR4    | 365490  | 676 | 5   | 437880  | 126024  | 0 | 2  | 2 | 0 | 4  | 5   | 1258104  | 5.26E-01 | 1 |
| TSPAN7  | 99411   | NaN | 23  | 649344  | 183696  | 0 | 2  | 0 | 0 | 50 | 42  | 17506656 | 5.26E-01 | 1 |
| ZNF792  | 903994  | 549 | -57 | 1621580 | 419368  | 0 | 6  | 1 | 0 | 36 | 106 | 25699640 | 5.26E-01 | 1 |
| OXER1   | 343875  | 378 | 28  | 1004632 | 356000  | 0 | 3  | 2 | 0 | 16 | 15  | 7444672  | 5.26E-01 | 1 |
| KIF3B   | 920221  | 146 | 58  | 1907804 | 522964  | 0 | 7  | 1 | 0 | 27 | 35  | 11622688 | 5.26E-01 | 1 |
| TMPRSS2 | 266466  | 454 | 61  | 1387688 | 372376  | 0 | 5  | 2 | 0 | 50 | 79  | 23245376 | 5.26E-01 | 1 |
| KCTD9   | 178615  | 515 | 22  | 1021720 | 274832  | 0 | 1  | 0 | 0 | 50 | 48  | 21259964 | 5.26E-01 | 1 |
| MAP7    | 302036  | 376 | 16  | 1918840 | 556784  | 0 | 7  | 1 | 0 | 3  | 3   | 1969036  | 5.26E-01 | 1 |
| CER1    | 160131  | 882 | -10 | 674976  | 190104  | 0 | 2  | 0 | 0 | 50 | 74  | 30175272 | 5.26E-01 | 1 |
| ARAP1   | 637045  | 234 | 54  | 3678548 | 1111432 | 0 | 10 | 1 | 0 | 4  | 6   | 3798164  | 5.26E-01 | 1 |
| CXorf66 | 66755   | NaN | 14  | 918480  | 252048  | 0 | 4  | 1 | 0 | 50 | 74  | 21999376 | 5.26E-01 | 1 |
| NFIB    | 135826  | 563 | -17 | 1085444 | 297616  | 0 | 4  | 0 | 0 | 50 | 60  | 25014696 | 5.27E-01 | 1 |
| CAMK1D  | 326642  | 556 | 35  | 1049844 | 264864  | 0 | 3  | 1 | 0 | 50 | 44  | 19718128 | 5.27E-01 | 1 |
| CNPY2   | 2869106 | 184 | 52  | 479888  | 127804  | 0 | 2  | 0 | 0 | 50 | 84  | 25337232 | 5.27E-01 | 1 |
| KCNK15  | 890596  | 168 | 46  | 784980  | 281952  | 0 | 3  | 1 | 0 | 50 | 63  | 21028564 | 5.27E-01 | 1 |
| WDR13   | 817501  | NaN | 29  | 1221792 | 369528  | 0 | 4  | 1 | 0 | 50 | 77  | 20781500 | 5.27E-01 | 1 |

|          |         |      |     |         |        |   |    |   |   |    |     |          |          |   |
|----------|---------|------|-----|---------|--------|---|----|---|---|----|-----|----------|----------|---|
| ZNF578   | 547660  | 989  | -53 | 1542548 | 363832 | 0 | 4  | 1 | 0 | 34 | 33  | 12611656 | 5.27E-01 | 1 |
| NOX4     | 30048   | 1071 | -25 | 1534004 | 393736 | 0 | 8  | 3 | 0 | 43 | 110 | 23842744 | 5.27E-01 | 1 |
| SUN1     | 642960  | 310  | 29  | 2173024 | 615524 | 0 | 5  | 1 | 0 | 50 | 53  | 23511664 | 5.27E-01 | 1 |
| TAC4     | 1152179 | 238  | 30  | 299752  | 82592  | 0 | 1  | 0 | 0 | 50 | 53  | 20182708 | 5.27E-01 | 1 |
| GIN1     | 205281  | 565  | 14  | 1359920 | 345676 | 0 | 3  | 2 | 0 | 50 | 46  | 18575368 | 5.27E-01 | 1 |
| USP53    | 227905  | 753  | 2   | 2805636 | 695268 | 0 | 9  | 1 | 0 | 50 | 58  | 23763712 | 5.27E-01 | 1 |
| CDS2     | 500170  | 482  | 24  | 1169104 | 311144 | 0 | 3  | 1 | 0 | 33 | 33  | 12298020 | 5.27E-01 | 1 |
| RTKN     | 1069803 | 343  | 45  | 1481672 | 451408 | 0 | 5  | 1 | 0 | 50 | 68  | 19848780 | 5.27E-01 | 1 |
| PRKAA2   | 39631   | 514  | -5  | 1427916 | 380208 | 0 | 6  | 0 | 0 | 27 | 39  | 13414080 | 5.27E-01 | 1 |
| SSBP2    | 159943  | 864  | 23  | 974016  | 254184 | 0 | 2  | 0 | 0 | 50 | 70  | 27318728 | 5.28E-01 | 1 |
| RAD54L   | 690472  | 205  | 31  | 1935928 | 537560 | 0 | 9  | 2 | 0 | 49 | 42  | 17582840 | 5.28E-01 | 1 |
| HECTD2   | 288529  | 384  | 4   | 2072276 | 528304 | 0 | 5  | 1 | 0 | 41 | 42  | 17824208 | 5.28E-01 | 1 |
| POLR2F   | 1370748 | 203  | 50  | 339268  | 87932  | 0 | 3  | 1 | 0 | 3  | 6   | 1253476  | 5.28E-01 | 1 |
| SLC26A11 | 684326  | 219  | 17  | 1506592 | 506588 | 0 | 4  | 2 | 0 | 50 | 52  | 19290216 | 5.28E-01 | 1 |
| PAPD7    | 253408  | 557  | 28  | 1392316 | 398720 | 0 | 7  | 3 | 0 | 8  | 7   | 2887516  | 5.28E-01 | 1 |
| SCNN1A   | 2670962 | 198  | 46  | 1870424 | 532576 | 0 | 10 | 1 | 0 | 4  | 7   | 2824504  | 5.28E-01 | 1 |
| ZNF474   | 69953   | 707  | 2   | 907800  | 261660 | 0 | 3  | 0 | 0 | 50 | 44  | 18647636 | 5.28E-01 | 1 |
| HOXA10   | 473864  | 394  | 13  | 1000360 | 335708 | 0 | 4  | 0 | 0 | 14 | 15  | 6307608  | 5.28E-01 | 1 |
| OR52N4   | 139577  | 922  | 2   | 797084  | 238876 | 0 | 3  | 1 | 0 | 50 | 48  | 17113632 | 5.28E-01 | 1 |
| RAD1     | 241905  | 675  | 21  | 737632  | 190460 | 0 | 2  | 0 | 0 | 50 | 44  | 20410904 | 5.29E-01 | 1 |
| PPM1B    | 448266  | 420  | 32  | 1284804 | 341760 | 0 | 8  | 0 | 0 | 2  | 0   | 470276   | 5.29E-01 | 1 |
| ACTL7B   | 336944  | 471  | 9   | 1019940 | 317196 | 0 | 3  | 0 | 0 | 34 | 34  | 14709564 | 5.29E-01 | 1 |
| DBI      | 203559  | 497  | 35  | 496976  | 128872 | 0 | 2  | 1 | 0 | 42 | 52  | 16309428 | 5.29E-01 | 1 |
| TSPAN9   | 523539  | 476  | 24  | 631544  | 167320 | 0 | 2  | 0 | 0 | 50 | 44  | 16570020 | 5.29E-01 | 1 |
| KDM2B    | 650760  | 244  | 46  | 3498056 | 970456 | 0 | 10 | 2 | 0 | 14 | 18  | 7881840  | 5.29E-01 | 1 |
| UXS1     | 125109  | 844  | 2   | 1125316 | 285512 | 0 | 2  | 0 | 0 | 50 | 49  | 19189824 | 5.29E-01 | 1 |
| FNDC7    | 743461  | 225  | 9   | 1868644 | 534356 | 0 | 6  | 1 | 0 | 50 | 72  | 24119356 | 5.29E-01 | 1 |
| PLD3     | 1006719 | 289  | 35  | 1248492 | 371664 | 0 | 4  | 2 | 0 | 50 | 73  | 21939212 | 5.29E-01 | 1 |
| PRG2     | 923815  | 191  | -3  | 578144  | 157708 | 0 | 3  | 1 | 0 | 50 | 67  | 17960912 | 5.29E-01 | 1 |
| KLHL30   | 428658  | 356  | 29  | 1430408 | 454612 | 0 | 3  | 0 | 0 | 9  | 3   | 3567120  | 5.29E-01 | 1 |
| MIP      | 2793663 | 184  | 61  | 641868  | 218940 | 0 | 3  | 1 | 0 | 42 | 73  | 21769400 | 5.29E-01 | 1 |
| TSPAN3   | 319089  | 441  | 40  | 656464  | 182984 | 0 | 3  | 2 | 0 | 6  | 19  | 4110020  | 5.29E-01 | 1 |
| PAWR     | 230993  | 395  | -8  | 854756  | 259168 | 0 | 2  | 1 | 0 | 50 | 45  | 23122556 | 5.29E-01 | 1 |



|         |         |      |     |         |        |   |    |   |   |    |     |          |          |   |
|---------|---------|------|-----|---------|--------|---|----|---|---|----|-----|----------|----------|---|
| ZNF547  | 432083  | 869  | -17 | 1040944 | 263084 | 0 | 3  | 1 | 0 | 50 | 60  | 18121112 | 5.29E-01 | 1 |
| INCA1   | 1407967 | 231  | 28  | 614456  | 170524 | 0 | 3  | 1 | 0 | 50 | 70  | 21740208 | 5.30E-01 | 1 |
| ARL6IP6 | 275277  | 716  | 6   | 562836  | 177288 | 0 | 2  | 1 | 0 | 50 | 59  | 20198016 | 5.30E-01 | 1 |
| KRIT1   | 707455  | 454  | 27  | 1943760 | 485940 | 0 | 10 | 4 | 0 | 16 | 21  | 6298708  | 5.30E-01 | 1 |
| POF1B   | 105434  | NaN  | -3  | 1577080 | 381632 | 0 | 3  | 2 | 0 | 33 | 45  | 15328648 | 5.30E-01 | 1 |
| ZXDC    | 295496  | 600  | 35  | 2119268 | 677824 | 0 | 5  | 1 | 0 | 31 | 21  | 10346072 | 5.30E-01 | 1 |
| MPP4    | 466105  | 534  | 28  | 1713428 | 420436 | 0 | 2  | 0 | 0 | 10 | 6   | 3716284  | 5.30E-01 | 1 |
| OR5H15  | 200002  | 811  | -15 | 778928  | 224992 | 0 | 4  | 1 | 0 | 50 | 87  | 21088372 | 5.30E-01 | 1 |
| OR5L2   | 4183    | 1091 | -36 | 761128  | 238520 | 0 | 8  | 2 | 0 | 14 | 26  | 3895352  | 5.30E-01 | 1 |
| IYD     | 286182  | 334  | 29  | 920616  | 212532 | 0 | 3  | 1 | 0 | 50 | 55  | 19430480 | 5.30E-01 | 1 |
| SP1     | 1707021 | 145  | 57  | 1945184 | 596656 | 0 | 11 | 5 | 0 | 12 | 21  | 4913512  | 5.31E-01 | 1 |
| HERC5   | 442906  | 295  | 29  | 2695988 | 682096 | 0 | 6  | 1 | 0 | 34 | 23  | 13756196 | 5.31E-01 | 1 |
| PEX16   | 427820  | 291  | 48  | 927736  | 291920 | 0 | 1  | 0 | 0 | 50 | 52  | 20813896 | 5.31E-01 | 1 |
| IL10    | 464449  | 357  | 29  | 473836  | 118904 | 0 | 2  | 1 | 0 | 3  | 4   | 1132436  | 5.31E-01 | 1 |
| NAA50   | 441530  | 419  | 24  | 454968  | 106800 | 0 | 1  | 0 | 0 | 50 | 57  | 20353232 | 5.31E-01 | 1 |
| CKAP4   | 168486  | 445  | 23  | 1484876 | 453544 | 0 | 4  | 1 | 0 | 37 | 42  | 14520884 | 5.31E-01 | 1 |
| TIMM8A  | 374364  | NaN  | 37  | 268780  | 69776  | 0 | 1  | 0 | 0 | 50 | 61  | 21564700 | 5.31E-01 | 1 |
| SLC10A5 | 158801  | 681  | 12  | 1082240 | 322180 | 0 | 4  | 0 | 0 | 50 | 67  | 18347172 | 5.31E-01 | 1 |
| CD93    | 199022  | 554  | -50 | 1586336 | 510148 | 0 | 8  | 3 | 0 | 19 | 25  | 7971196  | 5.31E-01 | 1 |
| NDEL1   | 761259  | 427  | 18  | 933788  | 250624 | 0 | 4  | 0 | 0 | 50 | 72  | 23239324 | 5.32E-01 | 1 |
| COMMD2  | 449009  | 263  | 21  | 520472  | 139552 | 0 | 2  | 0 | 0 | 50 | 60  | 19623788 | 5.32E-01 | 1 |
| ZBTB10  | 239826  | 369  | 30  | 2198656 | 616592 | 0 | 3  | 0 | 0 | 25 | 18  | 9184800  | 5.32E-01 | 1 |
| MFRP    | 1054477 | 263  | 40  | 1480960 | 428624 | 0 | 5  | 3 | 0 | 50 | 80  | 23473572 | 5.32E-01 | 1 |
| ZNF155  | 498673  | 419  | -36 | 1404064 | 339980 | 0 | 7  | 0 | 0 | 50 | 66  | 18850912 | 5.32E-01 | 1 |
| GLS     | 537377  | 292  | 36  | 1738348 | 480956 | 0 | 3  | 0 | 0 | 16 | 9   | 8381664  | 5.32E-01 | 1 |
| DGCR14  | 487560  | 277  | 18  | 1210400 | 358492 | 0 | 4  | 0 | 0 | 36 | 33  | 13333268 | 5.32E-01 | 1 |
| LBH     | 136617  | 581  | 18  | 280172  | 67996  | 0 | 1  | 0 | 0 | 50 | 51  | 18086936 | 5.32E-01 | 1 |
| EPHB1   | 74866   | 856  | 9   | 2513360 | 706660 | 0 | 12 | 2 | 0 | 50 | 69  | 23991196 | 5.32E-01 | 1 |
| OR7C2   | 961949  | 546  | 4   | 777860  | 246352 | 0 | 5  | 0 | 0 | 50 | 101 | 24125052 | 5.32E-01 | 1 |
| USP18   | 521791  | 289  | 11  | 988612  | 244928 | 0 | 2  | 0 | 0 | 38 | 57  | 20964840 | 5.32E-01 | 1 |
| HPCAL4  | 974845  | 388  | 36  | 506588  | 121396 | 0 | 2  | 1 | 0 | 50 | 62  | 16757632 | 5.32E-01 | 1 |
| NMU     | 247026  | 456  | 28  | 474548  | 124600 | 0 | 3  | 1 | 0 | 8  | 8   | 2091856  | 5.33E-01 | 1 |
| IL5     | 713465  | 320  | 66  | 349236  | 98256  | 0 | 1  | 0 | 0 | 50 | 41  | 19744828 | 5.33E-01 | 1 |

|           |         |      |     |         |        |   |    |   |   |    |     |          |          |   |
|-----------|---------|------|-----|---------|--------|---|----|---|---|----|-----|----------|----------|---|
| PTH2      | 2173457 | 290  | 44  | 236740  | 95408  | 0 | 1  | 1 | 0 | 50 | 67  | 19850560 | 5.33E-01 | 1 |
| NECAP2    | 813996  | 191  | 40  | 781776  | 209328 | 0 | 3  | 1 | 0 | 50 | 47  | 17210108 | 5.33E-01 | 1 |
| SLC28A2   | 494393  | 471  | 23  | 1698120 | 485940 | 0 | 4  | 0 | 0 | 23 | 24  | 10629092 | 5.33E-01 | 1 |
| YIPF5     | 39627   | 428  | 1   | 671060  | 176932 | 0 | 2  | 0 | 0 | 50 | 47  | 20521620 | 5.33E-01 | 1 |
| GNAL      | 281108  | 361  | 18  | 1325032 | 351728 | 0 | 4  | 0 | 0 | 8  | 11  | 5969408  | 5.33E-01 | 1 |
| RTAP23-   | 4608    | 1035 | -69 | 162692  | 50908  | 0 | 1  | 0 | 0 | 50 | 77  | 14168444 | 5.33E-01 | 1 |
| BZW2      | 326035  | 468  | -15 | 1112144 | 280528 | 0 | 3  | 1 | 0 | 50 | 62  | 19985484 | 5.33E-01 | 1 |
| DSCR4     | 78525   | 448  | 1   | 302244  | 87576  | 0 | 1  | 0 | 0 | 50 | 44  | 18242152 | 5.33E-01 | 1 |
| NLRP9     | 1024341 | 362  | -13 | 2543620 | 671060 | 0 | 12 | 2 | 0 | 30 | 37  | 10224676 | 5.34E-01 | 1 |
| ATP5J     | 534575  | 641  | 29  | 321468  | 76896  | 0 | 1  | 0 | 0 | 50 | 49  | 20134292 | 5.34E-01 | 1 |
| C10orf32  | 711862  | 192  | 45  | 289428  | 76896  | 0 | 1  | 0 | 0 | 50 | 62  | 22441884 | 5.34E-01 | 1 |
| PAPDC1E   | 763369  | 277  | 42  | 756500  | 211108 | 0 | 1  | 1 | 0 | 50 | 65  | 22314080 | 5.34E-01 | 1 |
| TMEM98    | 443753  | 833  | -6  | 576008  | 176932 | 0 | 2  | 0 | 0 | 50 | 62  | 19613108 | 5.34E-01 | 1 |
| LNX1      | 116784  | 492  | 26  | 1926672 | 552156 | 0 | 3  | 1 | 0 | 50 | 39  | 21850212 | 5.34E-01 | 1 |
| CCDC64B   | 1443513 | 234  | 49  | 1251696 | 415452 | 0 | 3  | 1 | 0 | 14 | 11  | 5039180  | 5.34E-01 | 1 |
| SMOC1     | 607548  | 307  | 41  | 1135284 | 308652 | 0 | 2  | 0 | 0 | 16 | 8   | 7111100  | 5.34E-01 | 1 |
| AGA       | 44980   | 837  | -8  | 901748  | 244216 | 0 | 5  | 1 | 0 | 46 | 76  | 21257116 | 5.34E-01 | 1 |
| HIST1H2BC | 390169  | 544  | 57  | 313636  | 96476  | 0 | 3  | 2 | 0 | 15 | 17  | 2533296  | 5.34E-01 | 1 |
| UGT1A5    | NaN     | NaN  | NaN | 1338916 | 392312 | 0 | 3  | 2 | 0 | 50 | 118 | 40037896 | 5.35E-01 | 1 |
| MOGAT3    | 1022626 | 258  | 39  | 866504  | 254896 | 0 | 4  | 0 | 0 | 50 | 67  | 19705312 | 5.35E-01 | 1 |
| IFRD2     | 843769  | 206  | 51  | 1264868 | 408688 | 0 | 4  | 1 | 0 | 50 | 68  | 20472848 | 5.35E-01 | 1 |
| CCDC116   | 521773  | 194  | 37  | 1521188 | 463156 | 0 | 4  | 1 | 0 | 12 | 11  | 5081544  | 5.35E-01 | 1 |
| TUBA3E    | 349797  | 593  | 22  | 1133860 | 332504 | 0 | 3  | 1 | 0 | 50 | 45  | 22118992 | 5.35E-01 | 1 |
| MYCT1     | 188249  | 600  | -9  | 583484  | 179068 | 0 | 2  | 1 | 0 | 50 | 78  | 26690388 | 5.35E-01 | 1 |
| SDHAF1    | NaN     | NaN  | NaN | 271628  | 102172 | 0 | 1  | 0 | 0 | 50 | 116 | 39747756 | 5.35E-01 | 1 |
| AKR1C1    | 343868  | 608  | -13 | 843364  | 228908 | 0 | 2  | 0 | 0 | 50 | 33  | 15973720 | 5.35E-01 | 1 |
| PDILT     | 212375  | 823  | 0   | 1524036 | 397296 | 0 | 4  | 2 | 0 | 14 | 10  | 5780728  | 5.35E-01 | 1 |
| S100A16   | 1454773 | 186  | 26  | 276612  | 65148  | 0 | 1  | 0 | 0 | 50 | 56  | 19376724 | 5.35E-01 | 1 |
| CPA3      | 306125  | 544  | -14 | 1108228 | 275900 | 0 | 6  | 2 | 0 | 50 | 77  | 21753736 | 5.35E-01 | 1 |
| KRT80     | 473704  | 198  | 46  | 1189040 | 336064 | 0 | 5  | 2 | 0 | 45 | 37  | 15400916 | 5.35E-01 | 1 |
| NLRP10    | 105341  | 679  | 6   | 1650772 | 459596 | 0 | 6  | 2 | 0 | 50 | 63  | 24898284 | 5.35E-01 | 1 |
| HOXD10    | 242935  | 874  | 15  | 866860  | 232112 | 0 | 2  | 1 | 0 | 50 | 65  | 19479964 | 5.35E-01 | 1 |
| CXCL14    | 493676  | 608  | 26  | 291920  | 79744  | 0 | 1  | 0 | 0 | 50 | 58  | 22046368 | 5.35E-01 | 1 |

|         |         |     |    |         |         |   |    |   |   |    |    |          |          |   |
|---------|---------|-----|----|---------|---------|---|----|---|---|----|----|----------|----------|---|
| SSU72   | 1690623 | 248 | 29 | 513708  | 128160  | 0 | 2  | 1 | 0 | 8  | 12 | 4331808  | 5.36E-01 | 1 |
| C2orf88 | 450974  | 478 | 21 | 247776  | 59808   | 0 | 1  | 0 | 0 | 16 | 16 | 5626936  | 5.36E-01 | 1 |
| TOB2    | 1480984 | 187 | 73 | 849060  | 260592  | 0 | 2  | 2 | 0 | 41 | 44 | 12897168 | 5.36E-01 | 1 |
| SHANK2  | 544815  | 678 | 36 | 4538644 | 1373804 | 0 | 10 | 3 | 0 | 26 | 18 | 10788224 | 5.36E-01 | 1 |
| KLRC3   | 378365  | 334 | 0  | 723748  | 178712  | 0 | 2  | 1 | 0 | 50 | 50 | 21701404 | 5.36E-01 | 1 |
| N4BP2   | 540527  | 260 | 45 | 4572108 | 1166256 | 0 | 16 | 6 | 0 | 11 | 14 | 5465668  | 5.36E-01 | 1 |
| TGS1    | 324398  | 409 | 17 | 2244224 | 543256  | 0 | 9  | 1 | 0 | 15 | 19 | 7370624  | 5.36E-01 | 1 |
| RPAP3   | 429377  | 382 | 5  | 1770032 | 432184  | 0 | 3  | 0 | 0 | 48 | 32 | 18159560 | 5.36E-01 | 1 |
| RPTOR   | 782748  | 381 | 22 | 3451064 | 970456  | 0 | 11 | 4 | 0 | 50 | 79 | 29828884 | 5.37E-01 | 1 |
| TCP11L1 | 415951  | 215 | 25 | 1310792 | 361696  | 0 | 6  | 0 | 0 | 10 | 9  | 3642948  | 5.37E-01 | 1 |
| METTL2A | 330776  | 370 | 5  | 997868  | 252760  | 0 | 5  | 2 | 0 | 9  | 16 | 4728748  | 5.37E-01 | 1 |
| STX1B   | 1398193 | 247 | 40 | 772164  | 192240  | 0 | 1  | 1 | 0 | 50 | 79 | 26328336 | 5.37E-01 | 1 |
| THEMIS  | 191535  | 553 | -9 | 1733364 | 474192  | 0 | 7  | 2 | 0 | 50 | 70 | 23075920 | 5.37E-01 | 1 |
| EID2B   | 1148741 | 322 | 25 | 387328  | 133856  | 0 | 1  | 0 | 0 | 50 | 44 | 18982632 | 5.37E-01 | 1 |
| GBP4    | 344056  | 834 | -2 | 1663944 | 432540  | 0 | 8  | 2 | 0 | 43 | 54 | 17079100 | 5.37E-01 | 1 |
| PPIE    | 975799  | 388 | 39 | 903528  | 218940  | 0 | 3  | 2 | 0 | 50 | 81 | 18001852 | 5.37E-01 | 1 |
| SOX12   | 879317  | 185 | 41 | 759348  | 253116  | 0 | 3  | 0 | 0 | 50 | 64 | 20950244 | 5.37E-01 | 1 |
| DSP     | 825560  | 218 | 12 | 7362792 | 1937352 | 0 | 31 | 9 | 0 | 50 | 67 | 20744476 | 5.37E-01 | 1 |
| ACSM1   | 175989  | 641 | 11 | 1491996 | 413316  | 0 | 2  | 0 | 0 | 9  | 4  | 3793892  | 5.37E-01 | 1 |
| FAM126A | 1063802 | 413 | 26 | 1349596 | 365612  | 0 | 3  | 2 | 0 | 50 | 77 | 26007224 | 5.37E-01 | 1 |
| OR6C74  | 411183  | 816 | -1 | 771096  | 230688  | 0 | 3  | 0 | 0 | 50 | 58 | 19503104 | 5.37E-01 | 1 |
| KCTD11  | 1911735 | 206 | 36 | 549664  | 196868  | 0 | 2  | 1 | 0 | 50 | 69 | 22072000 | 5.38E-01 | 1 |
| TRIM60  | 169984  | 637 | 5  | 1201500 | 315060  | 0 | 4  | 1 | 0 | 13 | 17 | 5631208  | 5.38E-01 | 1 |
| PANK3   | 413558  | 432 | 32 | 950520  | 263796  | 0 | 4  | 1 | 0 | 50 | 55 | 19572168 | 5.38E-01 | 1 |
| FMO4    | 421557  | 891 | -1 | 1443580 | 381632  | 0 | 8  | 2 | 0 | 50 | 76 | 21940992 | 5.38E-01 | 1 |
| HOXD13  | 242935  | 874 | 15 | 836600  | 271984  | 0 | 3  | 2 | 0 | 33 | 42 | 10580676 | 5.38E-01 | 1 |
| GPR1    | 332753  | 487 | 25 | 891780  | 253116  | 0 | 3  | 0 | 0 | 50 | 57 | 21975880 | 5.38E-01 | 1 |
| ZNF311  | 143617  | 569 | 25 | 1731228 | 427200  | 0 | 3  | 1 | 0 | 50 | 40 | 18953796 | 5.38E-01 | 1 |
| FBP1    | 260812  | 350 | 38 | 867216  | 248844  | 0 | 3  | 0 | 0 | 35 | 38 | 13111124 | 5.38E-01 | 1 |
| DNAJC17 | 1011507 | 172 | 46 | 812748  | 211464  | 0 | 3  | 0 | 0 | 30 | 31 | 11416920 | 5.38E-01 | 1 |
| COL5A3  | 1386309 | 413 | 1  | 4411908 | 1466364 | 0 | 14 | 7 | 0 | 50 | 79 | 25890812 | 5.38E-01 | 1 |
| PPIL6   | 328699  | 559 | 47 | 890712  | 226416  | 0 | 1  | 0 | 0 | 50 | 46 | 17980492 | 5.38E-01 | 1 |
| DAK     | 1394229 | 286 | 57 | 1439308 | 474548  | 0 | 5  | 3 | 0 | 50 | 56 | 17921040 | 5.38E-01 | 1 |

|          |         |      |     |         |        |   |    |   |   |    |    |          |          |   |
|----------|---------|------|-----|---------|--------|---|----|---|---|----|----|----------|----------|---|
| REP15    | 346550  | 376  | -4  | 598436  | 163048 | 0 | 2  | 1 | 0 | 13 | 13 | 5178732  | 5.38E-01 | 1 |
| S100A14  | 1454773 | 186  | 26  | 275544  | 73692  | 0 | 1  | 0 | 0 | 50 | 56 | 19376724 | 5.38E-01 | 1 |
| UGT2A1   | 19584   | 1065 | -8  | 1354580 | 360628 | 0 | 4  | 1 | 0 | 50 | 65 | 23148900 | 5.38E-01 | 1 |
| PAQR6    | 2266205 | 211  | 33  | 1216096 | 281240 | 0 | 3  | 0 | 0 | 50 | 61 | 22146048 | 5.38E-01 | 1 |
| INHBE    | 1347802 | 194  | 32  | 839092  | 289784 | 0 | 4  | 0 | 0 | 50 | 70 | 20818880 | 5.38E-01 | 1 |
| XKRX     | 363715  | NaN  | 37  | 1125672 | 324672 | 0 | 4  | 0 | 0 | 36 | 40 | 16063788 | 5.38E-01 | 1 |
| AQP9     | 242649  | 602  | 4   | 745820  | 223924 | 0 | 2  | 0 | 0 | 50 | 41 | 18036384 | 5.38E-01 | 1 |
| PEX7     | 253053  | 408  | 33  | 850484  | 228196 | 0 | 3  | 0 | 0 | 23 | 23 | 8726272  | 5.39E-01 | 1 |
| CRY1     | 169569  | 473  | 18  | 1525104 | 404772 | 0 | 4  | 1 | 0 | 50 | 43 | 20357504 | 5.39E-01 | 1 |
| OR13C8   | 147494  | 920  | -31 | 788184  | 239232 | 0 | 4  | 0 | 0 | 50 | 80 | 20017168 | 5.39E-01 | 1 |
| OR2M4    | 18846   | 936  | -35 | 766468  | 232112 | 0 | 3  | 0 | 0 | 50 | 93 | 20010048 | 5.39E-01 | 1 |
| PDZK1IP1 | 364960  | 414  | 3   | 297260  | 84016  | 0 | 1  | 0 | 0 | 50 | 53 | 20385984 | 5.39E-01 | 1 |
| INTS2    | 350722  | 380  | 2   | 3115356 | 850128 | 0 | 10 | 3 | 0 | 27 | 30 | 10835216 | 5.39E-01 | 1 |
| SAMSN1   | 157937  | 898  | 56  | 989680  | 240656 | 0 | 4  | 0 | 0 | 50 | 45 | 16631964 | 5.39E-01 | 1 |
| CNFN     | 792230  | 218  | 42  | 293700  | 81168  | 0 | 1  | 0 | 0 | 50 | 65 | 24510600 | 5.39E-01 | 1 |
| PLTP     | 725555  | 209  | 59  | 1258816 | 388040 | 0 | 6  | 0 | 0 | 27 | 40 | 9561092  | 5.39E-01 | 1 |
| HDAC8    | 366313  | NaN  | 39  | 1060524 | 278748 | 0 | 3  | 0 | 0 | 50 | 67 | 20763700 | 5.39E-01 | 1 |
| SSFA2    | 180253  | 346  | 18  | 3299408 | 914920 | 0 | 6  | 1 | 0 | 4  | 4  | 2835896  | 5.39E-01 | 1 |
| OPTC     | 529605  | 314  | 28  | 838736  | 258100 | 0 | 2  | 2 | 0 | 48 | 64 | 19367112 | 5.40E-01 | 1 |
| MIXL1    | 739974  | 278  | 21  | 554292  | 195444 | 0 | 2  | 0 | 0 | 43 | 57 | 19098688 | 5.40E-01 | 1 |
| SLC16A14 | 377632  | 648  | 26  | 1284448 | 369884 | 0 | 2  | 1 | 0 | 9  | 10 | 6066596  | 5.40E-01 | 1 |
| RPSA     | 160739  | 595  | 32  | 756144  | 217872 | 0 | 2  | 0 | 0 | 50 | 47 | 22330100 | 5.40E-01 | 1 |
| ZMAT3    | 371562  | 807  | -9  | 746532  | 203988 | 0 | 3  | 0 | 0 | 50 | 62 | 21058112 | 5.40E-01 | 1 |
| ARV1     | 376655  | 616  | 12  | 714136  | 180848 | 0 | 3  | 1 | 0 | 50 | 64 | 20436536 | 5.40E-01 | 1 |
| MTMR14   | 899035  | 348  | 39  | 1692068 | 470632 | 0 | 5  | 0 | 0 | 7  | 4  | 3016032  | 5.40E-01 | 1 |
| ECH1     | 1989663 | 219  | 30  | 852264  | 242436 | 0 | 4  | 0 | 0 | 50 | 70 | 21843448 | 5.40E-01 | 1 |
| CSF1     | 785919  | 216  | 30  | 1399080 | 413316 | 0 | 6  | 3 | 0 | 50 | 74 | 21989764 | 5.40E-01 | 1 |
| LCLAT1   | 140581  | 648  | 21  | 1084020 | 271272 | 0 | 3  | 1 | 0 | 50 | 48 | 22483892 | 5.40E-01 | 1 |
| NHLRC3   | 150239  | 998  | 11  | 889644  | 250980 | 0 | 3  | 2 | 0 | 22 | 32 | 8661480  | 5.40E-01 | 1 |
| ZNF641   | 809696  | 412  | 16  | 1210400 | 327520 | 0 | 3  | 1 | 0 | 50 | 60 | 19819232 | 5.40E-01 | 1 |
| CLK1     | 635570  | 201  | 31  | 1412252 | 327520 | 0 | 7  | 1 | 0 | 50 | 61 | 17116836 | 5.40E-01 | 1 |
| NANOG    | 175700  | 467  | 16  | 800644  | 192596 | 0 | 3  | 0 | 0 | 50 | 63 | 21166336 | 5.40E-01 | 1 |
| TNIP1    | 892080  | 382  | 27  | 1660028 | 453544 | 0 | 5  | 0 | 0 | 24 | 27 | 9916380  | 5.41E-01 | 1 |

|         |         |      |     |          |         |   |    |    |   |    |    |          |          |   |
|---------|---------|------|-----|----------|---------|---|----|----|---|----|----|----------|----------|---|
| DPH2    | 875223  | 214  | 39  | 1178716  | 412604  | 0 | 6  | 2  | 0 | 50 | 67 | 19898264 | 5.41E-01 | 1 |
| MYOZ1   | 1051799 | 153  | 43  | 761484   | 221076  | 0 | 2  | 0  | 0 | 50 | 57 | 24499920 | 5.41E-01 | 1 |
| TMEM225 | 89099   | 736  | -8  | 588468   | 148452  | 0 | 2  | 0  | 0 | 50 | 74 | 25706404 | 5.41E-01 | 1 |
| ATG4B   | 1268313 | 406  | 27  | 1066932  | 269136  | 0 | 3  | 1  | 0 | 50 | 59 | 18539056 | 5.41E-01 | 1 |
| NUP35   | 349831  | 524  | 11  | 845500   | 237452  | 0 | 3  | 0  | 0 | 50 | 47 | 18939200 | 5.41E-01 | 1 |
| ARHGEF2 | 1880483 | 213  | 32  | 2498764  | 753296  | 0 | 7  | 2  | 0 | 17 | 27 | 7552540  | 5.41E-01 | 1 |
| ZNF117  | 216422  | 994  | -9  | 1263088  | 296192  | 0 | 2  | 0  | 0 | 50 | 54 | 21329740 | 5.41E-01 | 1 |
| SIRPB1  | 421731  | 424  | 39  | 1929876  | 588468  | 0 | 7  | 1  | 0 | 40 | 48 | 16033172 | 5.41E-01 | 1 |
| CRTP13  | 4608    | 1035 | -69 | 425776   | 130652  | 0 | 3  | 0  | 0 | 11 | 5  | 1333576  | 5.41E-01 | 1 |
| MOAP1   | 325787  | 222  | 35  | 874336   | 253472  | 0 | 6  | 0  | 0 | 1  | 0  | 373088   | 5.41E-01 | 1 |
| PITX3   | 1020192 | 169  | 44  | 734428   | 249200  | 0 | 2  | 1  | 0 | 18 | 20 | 9534392  | 5.41E-01 | 1 |
| C1D     | 210519  | 537  | 2   | 381632   | 90424   | 0 | 1  | 0  | 0 | 50 | 48 | 21668652 | 5.41E-01 | 1 |
| DNAJA1  | 953054  | 286  | 0   | 1049844  | 259524  | 0 | 5  | 1  | 0 | 50 | 53 | 17598860 | 5.41E-01 | 1 |
| CBWD2   | 553274  | 555  | 22  | 1068000  | 260592  | 0 | 3  | 0  | 0 | 32 | 23 | 11661492 | 5.41E-01 | 1 |
| CBX7    | 1063921 | 223  | 78  | 638664   | 192240  | 0 | 2  | 1  | 0 | 41 | 45 | 17422640 | 5.42E-01 | 1 |
| OR5M8   | NaN     | NaN  | NaN | 776080   | 223568  | 0 | 4  | 2  | 0 | 26 | 42 | 11800688 | 5.42E-01 | 1 |
| GPR137C | 356488  | 313  | 14  | 1075120  | 328232  | 0 | 4  | 0  | 0 | 3  | 2  | 1220012  | 5.42E-01 | 1 |
| PXDNL   | 62919   | 1068 | -16 | 3719844  | 1066932 | 0 | 17 | 3  | 0 | 50 | 68 | 20781500 | 5.42E-01 | 1 |
| FANCB   | 111662  | NaN  | 21  | 2216100  | 573516  | 0 | 4  | 2  | 0 | 50 | 58 | 21189476 | 5.42E-01 | 1 |
| ANXA6   | 926280  | 300  | 41  | 1803496  | 462800  | 0 | 6  | 2  | 0 | 50 | 73 | 23722772 | 5.42E-01 | 1 |
| EPO     | 1483965 | 336  | 46  | 480600   | 158064  | 0 | 2  | 2  | 0 | 9  | 15 | 4840176  | 5.42E-01 | 1 |
| KCNK10  | 131280  | 834  | -23 | 1453548  | 414384  | 0 | 4  | 1  | 0 | 50 | 79 | 18934216 | 5.42E-01 | 1 |
| IFNA5   | 232155  | 466  | -14 | 485940   | 127092  | 0 | 1  | 0  | 0 | 50 | 45 | 18385976 | 5.42E-01 | 1 |
| ZNF554  | 1287128 | 291  | 27  | 1383416  | 360628  | 0 | 3  | 1  | 0 | 50 | 60 | 21755516 | 5.42E-01 | 1 |
| SAMD14  | 1237828 | 210  | 23  | 1120688  | 351016  | 0 | 5  | 0  | 0 | 28 | 38 | 13129636 | 5.42E-01 | 1 |
| LBX2    | 1019591 | 315  | 50  | 464224   | 164828  | 0 | 2  | 1  | 0 | 40 | 63 | 17658668 | 5.42E-01 | 1 |
| NXF1    | 2405109 | 248  | 44  | 1676404  | 452120  | 0 | 8  | 1  | 0 | 50 | 58 | 19762984 | 5.42E-01 | 1 |
| SCAI    | 951391  | 290  | 31  | 1663232  | 432184  | 0 | 7  | 1  | 0 | 50 | 70 | 19790752 | 5.42E-01 | 1 |
| IQCG    | 612221  | 410  | 33  | 1188328  | 276968  | 0 | 5  | 0  | 0 | 5  | 0  | 874692   | 5.42E-01 | 1 |
| EIF3L   | 1385064 | 203  | 66  | 1501608  | 362052  | 0 | 4  | 1  | 0 | 50 | 52 | 18523392 | 5.43E-01 | 1 |
| ZSCAN22 | 1621097 | 406  | -25 | 1231760  | 353152  | 0 | 5  | 1  | 0 | 50 | 63 | 19879752 | 5.43E-01 | 1 |
| OR4C16  | 1141    | 1100 | -37 | 775724   | 218584  | 0 | 6  | 0  | 0 | 50 | 92 | 19702464 | 5.43E-01 | 1 |
| HMCN1   | 260400  | 509  | -19 | 14461432 | 4049144 | 0 | 67 | 19 | 0 | 14 | 38 | 9299788  | 5.43E-01 | 1 |

|           |         |      |     |         |         |   |    |   |   |    |     |          |          |   |
|-----------|---------|------|-----|---------|---------|---|----|---|---|----|-----|----------|----------|---|
| ING1      | 560003  | 274  | 51  | 1161984 | 351372  | 0 | 2  | 0 | 0 | 29 | 25  | 10055220 | 5.43E-01 | 1 |
| DOCK3     | 395621  | 756  | 25  | 5336084 | 1395520 | 0 | 10 | 1 | 0 | 8  | 8   | 5630496  | 5.43E-01 | 1 |
| ZIC4      | 20725   | 1070 | -30 | 1055896 | 305804  | 0 | 7  | 1 | 0 | 50 | 122 | 25186644 | 5.43E-01 | 1 |
| ANXA3     | 243621  | 351  | 21  | 871844  | 217516  | 0 | 3  | 0 | 0 | 50 | 54  | 20771888 | 5.43E-01 | 1 |
| PPRC1     | 1029829 | 187  | 42  | 4040244 | 1352088 | 0 | 18 | 4 | 0 | 6  | 16  | 5941284  | 5.43E-01 | 1 |
| COL9A2    | 627703  | 373  | 18  | 1761488 | 583840  | 0 | 3  | 0 | 0 | 22 | 17  | 9075152  | 5.43E-01 | 1 |
| SENP1     | 457498  | 255  | 30  | 1705240 | 430760  | 0 | 4  | 0 | 0 | 27 | 17  | 8787148  | 5.43E-01 | 1 |
| ZNF664    | 903375  | 539  | 36  | 687436  | 152012  | 0 | 2  | 0 | 0 | 50 | 46  | 18738416 | 5.43E-01 | 1 |
| TMEM53    | 563553  | 252  | 45  | 682452  | 218940  | 0 | 2  | 0 | 0 | 28 | 30  | 12632304 | 5.43E-01 | 1 |
| MED1      | 1434634 | 214  | 17  | 4003220 | 1133860 | 0 | 20 | 4 | 0 | 17 | 33  | 9306908  | 5.44E-01 | 1 |
| AAGAB     | 312039  | 320  | 45  | 835532  | 215380  | 0 | 5  | 1 | 0 | 30 | 35  | 9988648  | 5.44E-01 | 1 |
| CREM      | 179129  | 346  | 15  | 1117484 | 298684  | 0 | 2  | 0 | 0 | 50 | 55  | 20218664 | 5.44E-01 | 1 |
| RAB9B     | 472103  | NaN  | 26  | 515132  | 136348  | 0 | 2  | 1 | 0 | 50 | 79  | 25392412 | 5.44E-01 | 1 |
| TMUB1     | 622098  | 373  | 41  | 587756  | 212176  | 0 | 4  | 2 | 0 | 2  | 4   | 1207196  | 5.44E-01 | 1 |
| DDTL      | NaN     | NaN  | NaN | 336064  | 107156  | 0 | 1  | 0 | 0 | 50 | 116 | 39752740 | 5.44E-01 | 1 |
| GTF3C3    | 404194  | 370  | 14  | 2319340 | 597368  | 0 | 6  | 3 | 0 | 50 | 59  | 23575388 | 5.44E-01 | 1 |
| RBBP7     | 289514  | NaN  | 39  | 1127452 | 284444  | 0 | 4  | 1 | 0 | 50 | 82  | 21778656 | 5.44E-01 | 1 |
| CCRN4L    | 332509  | 361  | 32  | 1063372 | 329300  | 0 | 1  | 2 | 0 | 50 | 40  | 18887936 | 5.44E-01 | 1 |
| SOX1      | 67826   | 793  | -33 | 934856  | 323248  | 0 | 3  | 1 | 0 | 25 | 42  | 10226812 | 5.44E-01 | 1 |
| PPAP2A    | 345749  | 277  | 33  | 864724  | 239588  | 0 | 4  | 1 | 0 | 50 | 60  | 20518060 | 5.44E-01 | 1 |
| RAP1B     | 439623  | 356  | 37  | 496620  | 126024  | 0 | 2  | 1 | 0 | 20 | 35  | 10689256 | 5.44E-01 | 1 |
| LPAR4     | 16059   | NaN  | 22  | 921684  | 271272  | 0 | 2  | 1 | 0 | 50 | 57  | 20357504 | 5.44E-01 | 1 |
| DCN       | 24351   | 591  | -19 | 928448  | 254896  | 0 | 4  | 0 | 0 | 33 | 29  | 10682848 | 5.44E-01 | 1 |
| ERAL1     | 1693126 | 177  | 31  | 1116772 | 327164  | 0 | 4  | 2 | 0 | 50 | 79  | 19478896 | 5.44E-01 | 1 |
| E2F3      | 138711  | 568  | 7   | 1161984 | 356712  | 0 | 2  | 1 | 0 | 50 | 57  | 20908592 | 5.45E-01 | 1 |
| PDIA5     | 468830  | 360  | 44  | 1387688 | 346744  | 0 | 6  | 1 | 0 | 50 | 51  | 17356424 | 5.45E-01 | 1 |
| CREBL2    | 791567  | 157  | 32  | 322180  | 78320   | 0 | 1  | 0 | 0 | 50 | 66  | 23408068 | 5.45E-01 | 1 |
| HIST1H2BI | 398813  | 636  | 53  | 318976  | 96476   | 0 | 7  | 3 | 0 | 10 | 17  | 1340340  | 5.45E-01 | 1 |
| CASKIN1   | 2179404 | 224  | 39  | 3487376 | 1184056 | 0 | 9  | 2 | 0 | 50 | 46  | 19527312 | 5.45E-01 | 1 |
| CYB561D1  | 1056159 | 272  | 37  | 747600  | 197580  | 0 | 3  | 0 | 0 | 50 | 61  | 17976932 | 5.45E-01 | 1 |
| MEF2C     | 98604   | 1192 | 32  | 1339272 | 369528  | 0 | 4  | 0 | 0 | 50 | 50  | 20204424 | 5.45E-01 | 1 |
| GTDC1     | 60793   | 692  | 12  | 1201856 | 307228  | 0 | 3  | 0 | 0 | 50 | 57  | 21672924 | 5.45E-01 | 1 |
| SUPT5H    | 1410725 | 230  | 39  | 2845508 | 768604  | 0 | 9  | 4 | 0 | 50 | 81  | 27705344 | 5.45E-01 | 1 |

|         |         |      |     |         |         |   |    |   |   |    |     |          |          |   |
|---------|---------|------|-----|---------|---------|---|----|---|---|----|-----|----------|----------|---|
| CLEC1A  | 396940  | 445  | -1  | 738700  | 185120  | 0 | 2  | 0 | 0 | 50 | 48  | 19709940 | 5.45E-01 | 1 |
| ZFAND2A | 774288  | 346  | 36  | 397296  | 87576   | 0 | 1  | 0 | 0 | 50 | 36  | 18514848 | 5.45E-01 | 1 |
| CD164   | 347811  | 446  | 41  | 546816  | 161268  | 0 | 2  | 0 | 0 | 50 | 66  | 21277764 | 5.45E-01 | 1 |
| SERTAD3 | 1010633 | 202  | 34  | 481668  | 153792  | 0 | 2  | 0 | 0 | 50 | 62  | 18103668 | 5.45E-01 | 1 |
| MUM1    | 2285841 | 209  | 31  | 1810616 | 526168  | 0 | 5  | 1 | 0 | 50 | 60  | 22146760 | 5.45E-01 | 1 |
| DPF3    | 317807  | 599  | 41  | 937348  | 245996  | 0 | 1  | 0 | 0 | 50 | 45  | 17709220 | 5.45E-01 | 1 |
| SMR3A   | 264684  | 915  | 25  | 323604  | 117480  | 0 | 1  | 0 | 0 | 50 | 42  | 17431540 | 5.46E-01 | 1 |
| TRIM67  | 381758  | 603  | 8   | 1950524 | 601996  | 0 | 5  | 1 | 0 | 39 | 57  | 16597432 | 5.46E-01 | 1 |
| OPA3    | 1107927 | 194  | 44  | 766112  | 247420  | 0 | 3  | 1 | 0 | 50 | 55  | 18375296 | 5.46E-01 | 1 |
| RAB28   | 134712  | 704  | 22  | 715916  | 174796  | 0 | 3  | 0 | 0 | 50 | 133 | 48571928 | 5.46E-01 | 1 |
| IRF1    | 713465  | 320  | 66  | 866860  | 216092  | 0 | 2  | 0 | 0 | 50 | 41  | 19744828 | 5.46E-01 | 1 |
| OR51G1  | 65798   | 1006 | -15 | 782488  | 247064  | 0 | 3  | 0 | 0 | 50 | 67  | 21104748 | 5.46E-01 | 1 |
| EXTL2   | 193606  | 859  | -3  | 853688  | 223924  | 0 | 3  | 0 | 0 | 50 | 59  | 20822796 | 5.46E-01 | 1 |
| BLID    | 143859  | 453  | 4   | 265220  | 84016   | 0 | 1  | 0 | 0 | 50 | 49  | 16541896 | 5.46E-01 | 1 |
| BIRC3   | 462955  | 280  | 5   | 1565688 | 406908  | 0 | 4  | 1 | 0 | 50 | 68  | 23275992 | 5.46E-01 | 1 |
| ST18    | 155128  | 793  | -15 | 2724468 | 718764  | 0 | 13 | 3 | 0 | 18 | 42  | 9318300  | 5.46E-01 | 1 |
| OSGIN2  | 251472  | 419  | 35  | 1396944 | 386616  | 0 | 4  | 1 | 0 | 48 | 47  | 18562552 | 5.46E-01 | 1 |
| ZNF790  | 352375  | 976  | -36 | 1671776 | 386260  | 0 | 5  | 0 | 0 | 17 | 38  | 9834856  | 5.46E-01 | 1 |
| ITFG1   | 489472  | 809  | -5  | 1613748 | 425064  | 0 | 2  | 1 | 0 | 50 | 57  | 20424432 | 5.46E-01 | 1 |
| C1QTNF5 | NaN     | NaN  | NaN | 589892  | 200428  | 0 | 2  | 0 | 0 | 50 | 116 | 39846012 | 5.46E-01 | 1 |
| ST3GAL4 | 349521  | 514  | 31  | 864724  | 235316  | 0 | 1  | 1 | 0 | 48 | 58  | 21642308 | 5.46E-01 | 1 |
| LRIT1   | 216124  | 810  | -10 | 1514780 | 499468  | 0 | 7  | 2 | 0 | 50 | 72  | 21473208 | 5.46E-01 | 1 |
| SDCBP   | 200469  | 608  | 11  | 783912  | 211464  | 0 | 2  | 0 | 0 | 50 | 52  | 22903972 | 5.46E-01 | 1 |
| TFDP2   | 488711  | 410  | 27  | 1263088 | 336776  | 0 | 4  | 2 | 0 | 50 | 72  | 22568976 | 5.47E-01 | 1 |
| MAFB    | 308177  | 550  | -29 | 794948  | 243148  | 0 | 4  | 2 | 0 | 19 | 34  | 8704200  | 5.47E-01 | 1 |
| IL12B   | 129528  | 415  | 27  | 861164  | 218584  | 0 | 2  | 1 | 0 | 50 | 38  | 20134292 | 5.47E-01 | 1 |
| CTRL    | 879834  | 158  | 50  | 671060  | 205768  | 0 | 3  | 0 | 0 | 50 | 85  | 23764780 | 5.47E-01 | 1 |
| TYMP    | 1075525 | 207  | 42  | 1186548 | 407976  | 0 | 4  | 0 | 0 | 6  | 6   | 2468504  | 5.47E-01 | 1 |
| DNAJB8  | 829484  | 317  | 50  | 582416  | 164116  | 0 | 3  | 0 | 0 | 50 | 61  | 19655472 | 5.47E-01 | 1 |
| TCL1B   | 256627  | 582  | 30  | 333216  | 95052   | 0 | 1  | 0 | 0 | 50 | 57  | 21579296 | 5.47E-01 | 1 |
| HACE1   | 108074  | 924  | -9  | 2396236 | 617660  | 0 | 6  | 0 | 0 | 16 | 28  | 9983664  | 5.47E-01 | 1 |
| FAM135B | 6187    | 989  | -37 | 3567476 | 1021720 | 0 | 21 | 4 | 0 | 1  | 4   | 1335000  | 5.47E-01 | 1 |
| ZNF160  | 395233  | 946  | -48 | 2112860 | 528304  | 0 | 11 | 2 | 0 | 50 | 54  | 17306228 | 5.47E-01 | 1 |

|          |         |     |     |          |         |   |    |   |   |    |    |          |          |   |
|----------|---------|-----|-----|----------|---------|---|----|---|---|----|----|----------|----------|---|
| RELA     | 4131934 | 202 | 53  | 1383416  | 427912  | 0 | 4  | 0 | 0 | 24 | 26 | 11885772 | 5.47E-01 | 1 |
| EGFR     | 423489  | 336 | -13 | 3378796  | 892136  | 0 | 9  | 3 | 0 | 44 | 36 | 17124312 | 5.47E-01 | 1 |
| NFE2     | 753625  | 205 | 59  | 907088   | 299752  | 0 | 3  | 0 | 0 | 31 | 42 | 11449672 | 5.47E-01 | 1 |
| SP100    | 478720  | 559 | 38  | 2890364  | 653260  | 0 | 13 | 1 | 0 | 19 | 21 | 7686752  | 5.47E-01 | 1 |
| PLIN2    | 500437  | 324 | -7  | 1119976  | 313280  | 0 | 3  | 0 | 0 | 50 | 72 | 22846300 | 5.47E-01 | 1 |
| KIAA1143 | 433853  | 426 | 27  | 405840   | 101460  | 0 | 1  | 1 | 0 | 6  | 8  | 3605924  | 5.48E-01 | 1 |
| CACNA2D  | 240778  | 593 | 28  | 2998944  | 805272  | 0 | 7  | 1 | 0 | 8  | 8  | 5073000  | 5.48E-01 | 1 |
| NLGN4Y   | 0       | 0   | 0   | 2202216  | 601284  | 0 | 4  | 0 | 0 | 39 | 23 | 17595656 | 5.48E-01 | 1 |
| SMARCD1  | 1003045 | 211 | 56  | 1327524  | 377004  | 0 | 4  | 2 | 0 | 25 | 40 | 9711324  | 5.48E-01 | 1 |
| COPS3    | 910162  | 218 | 11  | 1126028  | 281596  | 0 | 6  | 0 | 0 | 19 | 33 | 9655432  | 5.48E-01 | 1 |
| DHRS4L2  | 984811  | 442 | 23  | 591672   | 184764  | 0 | 2  | 1 | 0 | 50 | 76 | 25828868 | 5.48E-01 | 1 |
| LHFP     | 153723  | 939 | 4   | 503384   | 149164  | 0 | 2  | 0 | 0 | 50 | 58 | 17558276 | 5.48E-01 | 1 |
| BBS10    | 563668  | 507 | -10 | 1815244  | 510860  | 0 | 6  | 2 | 0 | 50 | 62 | 19644080 | 5.48E-01 | 1 |
| PSMB1    | 425191  | 598 | -16 | 623356   | 176576  | 0 | 2  | 0 | 0 | 50 | 46 | 17122888 | 5.48E-01 | 1 |
| B3GNT9   | 1093307 | 150 | 47  | 948740   | 342472  | 0 | 2  | 0 | 0 | 11 | 6  | 4687808  | 5.48E-01 | 1 |
| MTR      | 407246  | 773 | -13 | 3317208  | 875760  | 0 | 7  | 3 | 0 | 47 | 52 | 17999360 | 5.48E-01 | 1 |
| MYEOV    | 558031  | 443 | 37  | 751516   | 263084  | 0 | 1  | 0 | 0 | 50 | 71 | 25824596 | 5.48E-01 | 1 |
| KLHDC3   | 1200368 | 259 | 40  | 996444   | 273408  | 0 | 4  | 0 | 0 | 39 | 44 | 15846272 | 5.49E-01 | 1 |
| GABRG2   | 8332    | 869 | -14 | 1341764  | 354220  | 0 | 4  | 1 | 0 | 35 | 69 | 20870856 | 5.49E-01 | 1 |
| LYRM1    | 260596  | 545 | 33  | 313992   | 90780   | 0 | 1  | 0 | 0 | 50 | 57 | 21545120 | 5.49E-01 | 1 |
| BBOX1    | 178328  | 527 | -18 | 1018872  | 254184  | 0 | 5  | 2 | 0 | 27 | 56 | 15715264 | 5.49E-01 | 1 |
| SLC6A20  | 286183  | 385 | 43  | 1506948  | 435744  | 0 | 4  | 3 | 0 | 50 | 53 | 19140340 | 5.49E-01 | 1 |
| PKN2     | 280301  | 449 | 0   | 2577440  | 668212  | 0 | 7  | 1 | 0 | 50 | 54 | 24221528 | 5.49E-01 | 1 |
| GALNS    | 836710  | 188 | 44  | 1351376  | 381988  | 0 | 3  | 0 | 0 | 13 | 5  | 4023512  | 5.49E-01 | 1 |
| YTHDF1   | 1005137 | 285 | 50  | 1419016  | 392312  | 0 | 4  | 0 | 0 | 50 | 62 | 19950240 | 5.49E-01 | 1 |
| SYTL2    | 354036  | 435 | 1   | 4522268  | 1199008 | 0 | 13 | 3 | 0 | 26 | 30 | 11520516 | 5.49E-01 | 1 |
| ATP5SL   | 1104034 | 376 | 38  | 732648   | 160200  | 0 | 2  | 1 | 0 | 50 | 74 | 17589960 | 5.49E-01 | 1 |
| BIRC6    | 388754  | 517 | 24  | 12356760 | 3520128 | 0 | 52 | 8 | 0 | 6  | 12 | 5149896  | 5.49E-01 | 1 |
| PSMC2    | 355264  | 620 | 17  | 1142404  | 297260  | 0 | 3  | 2 | 0 | 11 | 8  | 4841956  | 5.50E-01 | 1 |
| C1orf56  | 1614665 | 165 | 40  | 823428   | 278748  | 0 | 2  | 2 | 0 | 14 | 12 | 4709880  | 5.50E-01 | 1 |
| SPARC    | 725286  | 496 | 43  | 808832   | 203632  | 0 | 2  | 0 | 0 | 50 | 56 | 25411992 | 5.50E-01 | 1 |
| ZNF613   | 452542  | 838 | -61 | 1596304  | 398720  | 0 | 6  | 3 | 0 | 25 | 40 | 8703844  | 5.50E-01 | 1 |
| NDFIP2   | 154294  | 370 | 50  | 862944   | 248844  | 0 | 1  | 0 | 0 | 38 | 33 | 13055588 | 5.50E-01 | 1 |



|         |         |     |     |         |         |   |    |   |   |    |     |          |          |   |
|---------|---------|-----|-----|---------|---------|---|----|---|---|----|-----|----------|----------|---|
| APIP    | 650532  | 399 | 1   | 658244  | 164116  | 0 | 2  | 0 | 0 | 50 | 45  | 18155644 | 5.50E-01 | 1 |
| POU3F2  | 171189  | 927 | -7  | 1084376 | 338200  | 0 | 4  | 0 | 0 | 50 | 51  | 19879396 | 5.50E-01 | 1 |
| AGAP3   | 616572  | 337 | 39  | 2339988 | 726240  | 0 | 8  | 4 | 0 | 11 | 15  | 4977236  | 5.50E-01 | 1 |
| TRIM24  | 272427  | 552 | 10  | 2719128 | 725172  | 0 | 9  | 1 | 0 | 34 | 34  | 14976564 | 5.50E-01 | 1 |
| ENO1    | 800628  | 171 | 28  | 1129588 | 311144  | 0 | 2  | 2 | 0 | 50 | 54  | 21005424 | 5.50E-01 | 1 |
| POLR3C  | NaN     | NaN | NaN | 1398368 | 377716  | 0 | 5  | 1 | 0 | 50 | 117 | 40023300 | 5.50E-01 | 1 |
| FUNDC1  | 91432   | NaN | 20  | 409044  | 107868  | 0 | 1  | 0 | 0 | 50 | 57  | 24001876 | 5.50E-01 | 1 |
| LHX8    | 162631  | 959 | -23 | 922752  | 255252  | 0 | 5  | 0 | 0 | 50 | 109 | 25474292 | 5.50E-01 | 1 |
| TSTA3   | 2183482 | 235 | 37  | 848704  | 225704  | 0 | 2  | 0 | 0 | 50 | 40  | 19636960 | 5.50E-01 | 1 |
| FBXO38  | 82911   | 459 | 1   | 3088300 | 810968  | 0 | 6  | 1 | 0 | 17 | 11  | 6237476  | 5.50E-01 | 1 |
| TSPAN11 | 315469  | 555 | -5  | 655040  | 188680  | 0 | 1  | 1 | 0 | 50 | 54  | 16395936 | 5.50E-01 | 1 |
| SLC17A5 | 713348  | 132 | 31  | 1268784 | 363120  | 0 | 4  | 1 | 0 | 50 | 45  | 21015036 | 5.51E-01 | 1 |
| OR4K13  | 383274  | 768 | -37 | 748668  | 226416  | 0 | 1  | 2 | 0 | 32 | 40  | 12755836 | 5.51E-01 | 1 |
| CHRM5   | 409900  | 384 | 2   | 1322540 | 389464  | 0 | 3  | 0 | 0 | 44 | 43  | 16471764 | 5.51E-01 | 1 |
| SSTR3   | 845055  | 230 | 67  | 1000360 | 346388  | 0 | 3  | 0 | 0 | 4  | 3   | 2346040  | 5.51E-01 | 1 |
| TRPC1   | 414031  | 437 | 20  | 1971172 | 510860  | 0 | 7  | 0 | 0 | 20 | 30  | 14421560 | 5.51E-01 | 1 |
| ZFYVE26 | 484591  | 344 | 49  | 6452856 | 1860456 | 0 | 22 | 7 | 0 | 50 | 51  | 19049204 | 5.51E-01 | 1 |
| ARMC8   | 199119  | 358 | 18  | 1799224 | 477752  | 0 | 3  | 3 | 0 | 31 | 31  | 10929556 | 5.51E-01 | 1 |
| SERAC1  | 572602  | 209 | 40  | 1715208 | 450696  | 0 | 5  | 1 | 0 | 3  | 3   | 1684948  | 5.51E-01 | 1 |
| BMP15   | 15214   | NaN | 27  | 981136  | 286580  | 0 | 4  | 1 | 0 | 50 | 66  | 21104392 | 5.51E-01 | 1 |
| PRMT6   | 75609   | 921 | -16 | 912428  | 294412  | 0 | 3  | 3 | 0 | 6  | 12  | 3762920  | 5.51E-01 | 1 |
| DLG1    | 751489  | 417 | 36  | 2477404 | 640088  | 0 | 8  | 3 | 0 | 50 | 74  | 25235772 | 5.51E-01 | 1 |
| ZC4H2   | 98165   | NaN | -21 | 631544  | 126736  | 0 | 2  | 0 | 0 | 50 | 74  | 17661872 | 5.51E-01 | 1 |
| CLDN2   | 148608  | NaN | 22  | 557140  | 182984  | 0 | 2  | 1 | 0 | 50 | 128 | 42308820 | 5.51E-01 | 1 |
| MOB2    | 859301  | 426 | 39  | 718052  | 187612  | 0 | 2  | 0 | 0 | 50 | 47  | 19040304 | 5.51E-01 | 1 |
| TLX3    | 269453  | 434 | 25  | 714848  | 231400  | 0 | 2  | 0 | 0 | 21 | 18  | 8332892  | 5.51E-01 | 1 |
| TRIP13  | 812469  | 491 | 34  | 1134928 | 305804  | 0 | 4  | 1 | 0 | 50 | 60  | 20635184 | 5.52E-01 | 1 |
| FLCN    | 910162  | 218 | 11  | 1615884 | 456036  | 0 | 5  | 0 | 0 | 18 | 27  | 9154896  | 5.52E-01 | 1 |
| RRP15   | 75487   | 488 | -20 | 747956  | 178000  | 0 | 5  | 2 | 0 | 2  | 6   | 1047352  | 5.52E-01 | 1 |
| MYO3B   | 324392  | 844 | 28  | 3650424 | 929160  | 0 | 11 | 2 | 0 | 9  | 6   | 3461744  | 5.52E-01 | 1 |
| PLEKHN1 | 1971475 | 239 | 15  | 1563196 | 502316  | 0 | 5  | 2 | 0 | 12 | 27  | 8570344  | 5.52E-01 | 1 |
| SYPL2   | 1056159 | 272 | 37  | 700252  | 195800  | 0 | 3  | 0 | 0 | 50 | 61  | 17976932 | 5.52E-01 | 1 |
| CD81    | 911893  | 584 | 36  | 620508  | 168744  | 0 | 2  | 0 | 0 | 50 | 50  | 18764760 | 5.52E-01 | 1 |

|          |         |      |     |         |        |   |    |   |   |    |    |          |          |   |
|----------|---------|------|-----|---------|--------|---|----|---|---|----|----|----------|----------|---|
| SDAD1    | 486576  | 399  | 44  | 1855472 | 438592 | 0 | 5  | 4 | 0 | 15 | 15 | 5064812  | 5.52E-01 | 1 |
| CRISPLD1 | 137515  | 703  | -22 | 1336424 | 328588 | 0 | 5  | 0 | 0 | 16 | 20 | 6223236  | 5.52E-01 | 1 |
| AOAH     | 247838  | 600  | 15  | 1861880 | 434320 | 0 | 7  | 3 | 0 | 10 | 11 | 4189764  | 5.52E-01 | 1 |
| TDP2     | 419582  | 373  | 8   | 945180  | 245640 | 0 | 3  | 0 | 0 | 50 | 71 | 26744144 | 5.52E-01 | 1 |
| TMED6    | 1202748 | 125  | 20  | 620864  | 166252 | 0 | 5  | 2 | 0 | 6  | 6  | 1573164  | 5.52E-01 | 1 |
| ZNF704   | 143727  | 501  | 1   | 1061592 | 295836 | 0 | 4  | 1 | 0 | 50 | 46 | 18102956 | 5.52E-01 | 1 |
| ZNF460   | 419642  | 859  | -40 | 1434680 | 377716 | 0 | 7  | 2 | 0 | 50 | 68 | 17222212 | 5.52E-01 | 1 |
| SLC6A1   | 154960  | 444  | 36  | 1546108 | 431828 | 0 | 6  | 3 | 0 | 27 | 40 | 11357112 | 5.52E-01 | 1 |
| PLEKHA6  | 554014  | 370  | 33  | 2668576 | 782132 | 0 | 11 | 3 | 0 | 19 | 17 | 7723420  | 5.52E-01 | 1 |
| RASSF1   | 843769  | 206  | 51  | 987900  | 297972 | 0 | 2  | 2 | 0 | 50 | 68 | 20472848 | 5.53E-01 | 1 |
| FAM177B  | 221712  | 236  | -4  | 427200  | 99324  | 0 | 2  | 1 | 0 | 4  | 5  | 1144896  | 5.53E-01 | 1 |
| MBOAT1   | 127205  | 592  | 1   | 1287652 | 352796 | 0 | 2  | 1 | 0 | 50 | 58 | 24809640 | 5.53E-01 | 1 |
| SRC      | 685195  | 571  | 60  | 1370244 | 397296 | 0 | 4  | 0 | 0 | 6  | 1  | 1663232  | 5.53E-01 | 1 |
| IFIT3    | 253413  | 213  | 22  | 1262376 | 322536 | 0 | 3  | 2 | 0 | 20 | 24 | 9226452  | 5.53E-01 | 1 |
| FBXO22   | 550701  | 339  | 47  | 1057676 | 299752 | 0 | 5  | 3 | 0 | 21 | 19 | 6114300  | 5.53E-01 | 1 |
| ZNF257   | 75568   | 1305 | -69 | 1466720 | 353152 | 0 | 6  | 3 | 0 | 50 | 85 | 16338620 | 5.53E-01 | 1 |
| CCDC24   | 875223  | 214  | 39  | 779996  | 241012 | 0 | 3  | 1 | 0 | 50 | 67 | 19898264 | 5.54E-01 | 1 |
| SLC25A39 | 1036092 | 172  | 39  | 917412  | 283020 | 0 | 3  | 2 | 0 | 4  | 6  | 2271992  | 5.54E-01 | 1 |
| NUDT9    | 530607  | 537  | 23  | 916344  | 238164 | 0 | 3  | 0 | 0 | 50 | 47 | 17651192 | 5.54E-01 | 1 |
| POLI     | 98827   | 436  | 44  | 1914568 | 500180 | 0 | 5  | 1 | 0 | 24 | 31 | 11733404 | 5.54E-01 | 1 |
| FAM171B  | 264318  | 538  | -9  | 2088296 | 591316 | 0 | 7  | 1 | 0 | 37 | 37 | 16586040 | 5.54E-01 | 1 |
| CD3E     | 805791  | 211  | 41  | 561412  | 139196 | 0 | 2  | 0 | 0 | 50 | 62 | 21266728 | 5.54E-01 | 1 |
| HOXC5    | 1185281 | 279  | 54  | 566040  | 154860 | 0 | 2  | 0 | 0 | 50 | 59 | 19280960 | 5.54E-01 | 1 |
| CSTA     | 534078  | 602  | 44  | 259880  | 65860  | 0 | 1  | 0 | 0 | 50 | 70 | 22369260 | 5.54E-01 | 1 |
| SH2B3    | 466447  | 479  | 47  | 1407980 | 467428 | 0 | 4  | 0 | 0 | 7  | 6  | 3855480  | 5.54E-01 | 1 |
| SLC38A10 | 2679984 | 197  | 27  | 3000012 | 947316 | 0 | 11 | 3 | 0 | 21 | 28 | 10249596 | 5.54E-01 | 1 |
| TRHR     | 151352  | 616  | 18  | 1001072 | 283732 | 0 | 8  | 3 | 0 | 7  | 9  | 1871492  | 5.54E-01 | 1 |
| STOML1   | 337765  | 439  | 34  | 986120  | 320044 | 0 | 3  | 0 | 0 | 50 | 54 | 20944548 | 5.54E-01 | 1 |
| ETV6     | 233493  | 629  | 31  | 1163052 | 318264 | 0 | 7  | 1 | 0 | 6  | 7  | 1301180  | 5.54E-01 | 1 |
| FBXO6    | 682357  | 264  | 32  | 754364  | 208972 | 0 | 1  | 0 | 0 | 50 | 62 | 21513436 | 5.54E-01 | 1 |
| KBTBD2   | 373657  | 264  | 15  | 1580996 | 426844 | 0 | 6  | 2 | 0 | 45 | 38 | 15985468 | 5.54E-01 | 1 |
| NAA35    | 320125  | 381  | 21  | 1962272 | 457816 | 0 | 5  | 0 | 0 | 11 | 10 | 5992904  | 5.54E-01 | 1 |
| TARS     | 349408  | 674  | 4   | 1924892 | 471700 | 0 | 8  | 1 | 0 | 50 | 58 | 19970532 | 5.54E-01 | 1 |

|          |         |      |     |         |         |   |    |   |   |    |     |          |          |   |
|----------|---------|------|-----|---------|---------|---|----|---|---|----|-----|----------|----------|---|
| PCDHGC4  | 665835  | 568  | 9   | 2416528 | 786404  | 0 | 7  | 1 | 0 | 11 | 13  | 5171968  | 5.54E-01 | 1 |
| MRPS14   | 176818  | 828  | 4   | 327520  | 96476   | 0 | 1  | 0 | 0 | 50 | 65  | 19765832 | 5.54E-01 | 1 |
| MRPS26   | 835590  | 288  | 54  | 514776  | 160200  | 0 | 2  | 0 | 0 | 50 | 59  | 17488856 | 5.54E-01 | 1 |
| PDPN     | 64295   | 864  | 9   | 595944  | 193308  | 0 | 2  | 0 | 0 | 50 | 67  | 24632708 | 5.55E-01 | 1 |
| TMBIM4   | 243040  | 696  | 5   | 615168  | 178356  | 0 | 2  | 0 | 0 | 50 | 59  | 21205496 | 5.55E-01 | 1 |
| KCNK2    | 363438  | 818  | -28 | 1114992 | 323604  | 0 | 5  | 0 | 0 | 50 | 63  | 18080528 | 5.55E-01 | 1 |
| MOGAT1   | 251851  | 308  | 19  | 870420  | 231756  | 0 | 2  | 0 | 0 | 17 | 11  | 6296572  | 5.55E-01 | 1 |
| HP1BP3   | 641625  | 206  | 30  | 1432900 | 393380  | 0 | 3  | 0 | 0 | 6  | 3   | 2392676  | 5.55E-01 | 1 |
| TAGLN2   | 803074  | 403  | 7   | 518692  | 139196  | 0 | 2  | 0 | 0 | 50 | 49  | 15043848 | 5.55E-01 | 1 |
| THSD4    | 312827  | 505  | 3   | 2614464 | 720900  | 0 | 6  | 2 | 0 | 29 | 33  | 12375984 | 5.55E-01 | 1 |
| OR7A10   | 963401  | 546  | 14  | 762196  | 231044  | 0 | 2  | 2 | 0 | 37 | 53  | 12940600 | 5.55E-01 | 1 |
| SLC25A44 | 2294665 | 211  | 39  | 785336  | 236740  | 0 | 2  | 1 | 0 | 50 | 46  | 21184848 | 5.55E-01 | 1 |
| MAGEA3   | 201810  | NaN  | -3  | 781776  | 231756  | 0 | 3  | 1 | 0 | 14 | 10  | 4013188  | 5.55E-01 | 1 |
| MPRSS11  | 170820  | 716  | -19 | 1097548 | 276968  | 0 | 3  | 0 | 0 | 15 | 16  | 7705620  | 5.55E-01 | 1 |
| CD180    | 36320   | 392  | 14  | 1671420 | 458172  | 0 | 6  | 1 | 0 | 50 | 58  | 19989044 | 5.56E-01 | 1 |
| AKR7A3   | 810462  | 448  | 40  | 846212  | 245284  | 0 | 1  | 0 | 0 | 50 | 48  | 16954856 | 5.56E-01 | 1 |
| RNF44    | 607190  | 318  | 49  | 1087224 | 342828  | 0 | 2  | 2 | 0 | 50 | 44  | 17331860 | 5.56E-01 | 1 |
| OR52L1   | 432250  | 877  | -13 | 800288  | 261304  | 0 | 2  | 1 | 0 | 50 | 63  | 18144964 | 5.56E-01 | 1 |
| CCDC74A  | 455705  | 540  | 29  | 960844  | 285512  | 0 | 3  | 0 | 0 | 46 | 48  | 16849480 | 5.56E-01 | 1 |
| SLC12A7  | 639628  | 424  | 31  | 2751880 | 821648  | 0 | 10 | 4 | 0 | 50 | 49  | 17595300 | 5.56E-01 | 1 |
| MRC1     | NaN     | NaN  | NaN | 7734812 | 1851556 | 0 | 24 | 8 | 0 | 50 | 124 | 41497140 | 5.56E-01 | 1 |
| RPS11    | 2126800 | 210  | 42  | 420080  | 110716  | 0 | 1  | 0 | 0 | 50 | 63  | 21387412 | 5.56E-01 | 1 |
| IPCEF1   | 100494  | 765  | 9   | 1187260 | 286580  | 0 | 4  | 0 | 0 | 50 | 66  | 27099432 | 5.56E-01 | 1 |
| GPT      | 1755818 | 291  | 7   | 1249204 | 385904  | 0 | 3  | 1 | 0 | 24 | 29  | 10834860 | 5.56E-01 | 1 |
| POLR2C   | 760307  | 159  | 42  | 730868  | 189748  | 0 | 3  | 0 | 0 | 50 | 66  | 21727748 | 5.56E-01 | 1 |
| TUFT1    | 1379189 | 176  | 30  | 1042012 | 264152  | 0 | 4  | 1 | 0 | 50 | 76  | 23715296 | 5.56E-01 | 1 |
| RTAP13L  | 4608    | 1035 | -69 | 431472  | 134568  | 0 | 3  | 0 | 0 | 11 | 5   | 1333576  | 5.56E-01 | 1 |
| NR1H2    | 1072052 | 528  | 26  | 1165900 | 345320  | 0 | 3  | 1 | 0 | 50 | 63  | 18767608 | 5.56E-01 | 1 |
| KCNJ8    | 501891  | 984  | -9  | 1060524 | 309720  | 0 | 5  | 0 | 0 | 50 | 74  | 20750528 | 5.56E-01 | 1 |
| UBA6     | 154681  | 604  | 33  | 2804924 | 707728  | 0 | 8  | 2 | 0 | 50 | 47  | 21728460 | 5.56E-01 | 1 |
| IFI44    | 85210   | 732  | -5  | 1151660 | 308296  | 0 | 3  | 0 | 0 | 16 | 8   | 5174816  | 5.56E-01 | 1 |
| IL18RAP  | 230715  | 671  | 4   | 1556788 | 408332  | 0 | 6  | 2 | 0 | 50 | 52  | 19350024 | 5.56E-01 | 1 |
| TTC7A    | 785914  | 242  | 38  | 2212184 | 621220  | 0 | 8  | 1 | 0 | 5  | 4   | 2249208  | 5.57E-01 | 1 |

|          |         |     |     |         |         |   |    |   |   |    |    |          |          |   |
|----------|---------|-----|-----|---------|---------|---|----|---|---|----|----|----------|----------|---|
| AADACL3  | 145424  | 454 | 23  | 895340  | 248488  | 0 | 3  | 0 | 0 | 50 | 54 | 19660812 | 5.57E-01 | 1 |
| UHMK1    | 334603  | 248 | 3   | 1120332 | 308652  | 0 | 2  | 1 | 0 | 50 | 54 | 22683608 | 5.57E-01 | 1 |
| AFTPH    | 532219  | 332 | 21  | 2401932 | 641868  | 0 | 7  | 1 | 0 | 48 | 45 | 22040316 | 5.57E-01 | 1 |
| ORIG1    | 445889  | 579 | -8  | 772520  | 233536  | 0 | 4  | 2 | 0 | 42 | 39 | 11853020 | 5.57E-01 | 1 |
| NVL      | 626336  | 139 | 16  | 2229628 | 612320  | 0 | 5  | 3 | 0 | 50 | 41 | 19100468 | 5.57E-01 | 1 |
| FBXO46   | 929036  | 203 | 43  | 1447496 | 491992  | 0 | 3  | 2 | 0 | 33 | 37 | 14234660 | 5.57E-01 | 1 |
| PDLIM4   | 451605  | 191 | 40  | 846568  | 241724  | 0 | 2  | 0 | 0 | 50 | 63 | 18692136 | 5.57E-01 | 1 |
| TNFRSF21 | 206419  | 389 | 1   | 1635464 | 487720  | 0 | 5  | 1 | 0 | 50 | 56 | 26659060 | 5.57E-01 | 1 |
| SERPINC1 | 443726  | 385 | 13  | 1188684 | 328944  | 0 | 4  | 0 | 0 | 16 | 13 | 6358516  | 5.57E-01 | 1 |
| TARS2    | 1532790 | 163 | 43  | 1825568 | 552868  | 0 | 9  | 1 | 0 | 50 | 76 | 23299844 | 5.57E-01 | 1 |
| OR52N2   | 203856  | 922 | -5  | 796016  | 234604  | 0 | 2  | 1 | 0 | 50 | 39 | 17006476 | 5.58E-01 | 1 |
| CDC6     | 1480458 | 191 | 23  | 1445716 | 398720  | 0 | 8  | 0 | 0 | 2  | 5  | 1437528  | 5.58E-01 | 1 |
| NHS      | 70191   | NaN | 12  | 4121412 | 1244220 | 0 | 13 | 1 | 0 | 1  | 2  | 1914924  | 5.58E-01 | 1 |
| ARHGAP28 | 241496  | 281 | -28 | 1621224 | 422928  | 0 | 7  | 0 | 0 | 18 | 23 | 6781800  | 5.58E-01 | 1 |
| AEBP2    | 152349  | 339 | -21 | 1337136 | 360984  | 0 | 2  | 0 | 0 | 48 | 46 | 20494920 | 5.58E-01 | 1 |
| OR13C9   | 147494  | 920 | -31 | 794948  | 226060  | 0 | 4  | 0 | 0 | 50 | 80 | 20017168 | 5.58E-01 | 1 |
| WDR74    | 2342595 | 181 | 71  | 994664  | 291208  | 0 | 2  | 0 | 0 | 50 | 77 | 24280268 | 5.58E-01 | 1 |
| HAUS7    | 971101  | NaN | 7   | 965828  | 254896  | 0 | 2  | 0 | 0 | 50 | 42 | 13736972 | 5.58E-01 | 1 |
| PDZD11   | 215874  | NaN | 52  | 379496  | 97900   | 0 | 1  | 0 | 0 | 50 | 56 | 22682540 | 5.58E-01 | 1 |
| DMC1     | 1160654 | 238 | 38  | 916344  | 231756  | 0 | 3  | 0 | 0 | 50 | 52 | 18166324 | 5.58E-01 | 1 |
| NOD2     | 294632  | 792 | 1   | 2588476 | 793880  | 0 | 7  | 4 | 0 | 27 | 33 | 11357112 | 5.58E-01 | 1 |
| SLC7A10  | 380625  | 270 | -9  | 1306520 | 417232  | 0 | 4  | 0 | 0 | 29 | 29 | 12084420 | 5.59E-01 | 1 |
| PDYN     | 461602  | 543 | 28  | 639020  | 186544  | 0 | 3  | 0 | 0 | 20 | 21 | 6282332  | 5.59E-01 | 1 |
| SBK1     | 1139917 | 221 | 55  | 1021364 | 353152  | 0 | 2  | 0 | 0 | 22 | 41 | 14686780 | 5.59E-01 | 1 |
| RABIF    | 422793  | 318 | 28  | 313636  | 90068   | 0 | 1  | 0 | 0 | 50 | 56 | 20577156 | 5.59E-01 | 1 |
| HSPB9    | 2171374 | 206 | 37  | 388752  | 126024  | 0 | 1  | 0 | 0 | 50 | 38 | 17832396 | 5.59E-01 | 1 |
| TSC22D2  | 514603  | 176 | 19  | 1877188 | 637952  | 0 | 5  | 2 | 0 | 50 | 47 | 19320120 | 5.59E-01 | 1 |
| CIB3     | 761374  | 298 | 42  | 501604  | 124244  | 0 | 2  | 0 | 0 | 50 | 57 | 18801428 | 5.59E-01 | 1 |
| CC2D2B   | 515809  | 798 | 33  | 1072628 | 258100  | 0 | 3  | 1 | 0 | 50 | 29 | 15313696 | 5.59E-01 | 1 |
| PLEKHO2  | 556478  | 205 | 50  | 1214316 | 380208  | 0 | 5  | 0 | 0 | 50 | 48 | 18457888 | 5.59E-01 | 1 |
| PRLR     | 247066  | 854 | 17  | 1600220 | 430048  | 0 | 5  | 1 | 0 | 50 | 47 | 19048492 | 5.59E-01 | 1 |
| TOP3A    | 941112  | 223 | 13  | 2574948 | 712356  | 0 | 9  | 2 | 0 | 38 | 60 | 19722400 | 5.59E-01 | 1 |
| MAP2K2   | 2276561 | 180 | 36  | 1029552 | 297972  | 0 | 3  | 0 | 0 | 50 | 55 | 23481760 | 5.59E-01 | 1 |

|         |         |     |     |         |         |   |    |   |   |    |    |          |          |   |
|---------|---------|-----|-----|---------|---------|---|----|---|---|----|----|----------|----------|---|
| RRP9    | 1013177 | 370 | 39  | 1235320 | 353864  | 0 | 4  | 2 | 0 | 50 | 85 | 19762272 | 5.59E-01 | 1 |
| APOH    | 135537  | 178 | -23 | 907088  | 234604  | 0 | 2  | 1 | 0 | 50 | 60 | 18369600 | 5.59E-01 | 1 |
| RIC3    | 244487  | 555 | 19  | 949096  | 256676  | 0 | 2  | 0 | 0 | 50 | 34 | 19662236 | 5.59E-01 | 1 |
| PCGF2   | 1158356 | 207 | 39  | 884660  | 261304  | 0 | 3  | 1 | 0 | 50 | 41 | 15942036 | 5.60E-01 | 1 |
| MITF    | 48041   | 436 | -15 | 1560348 | 400500  | 0 | 6  | 1 | 0 | 50 | 60 | 22282396 | 5.60E-01 | 1 |
| SLC9A7  | 686372  | NaN | 45  | 1861880 | 536848  | 0 | 4  | 2 | 0 | 50 | 47 | 21094068 | 5.60E-01 | 1 |
| ESCO2   | 406636  | 229 | 23  | 1570316 | 401212  | 0 | 2  | 0 | 0 | 12 | 3  | 4890372  | 5.60E-01 | 1 |
| CXCL6   | 233432  | 444 | 6   | 285512  | 95764   | 0 | 1  | 1 | 0 | 9  | 6  | 2595952  | 5.60E-01 | 1 |
| MYH7B   | 968413  | 236 | 40  | 5086172 | 1454260 | 0 | 16 | 6 | 0 | 50 | 62 | 22730956 | 5.60E-01 | 1 |
| NCOA2   | 265128  | 742 | 35  | 3776092 | 1007480 | 0 | 10 | 1 | 0 | 3  | 2  | 1917416  | 5.60E-01 | 1 |
| EPN2    | 658567  | 227 | 6   | 1589184 | 501960  | 0 | 3  | 0 | 0 | 14 | 9  | 7175536  | 5.60E-01 | 1 |
| SMC2    | 114849  | 953 | -33 | 3153448 | 787472  | 0 | 14 | 1 | 0 | 10 | 10 | 4610912  | 5.60E-01 | 1 |
| MGST3   | 321831  | 408 | 0   | 398008  | 113564  | 0 | 1  | 0 | 0 | 50 | 57 | 21890440 | 5.60E-01 | 1 |
| PADI2   | 610093  | 194 | 45  | 1720192 | 479888  | 0 | 6  | 1 | 0 | 50 | 72 | 21551172 | 5.60E-01 | 1 |
| CYP4F2  | 825892  | 575 | 15  | 1346392 | 373088  | 0 | 5  | 2 | 0 | 25 | 33 | 9024600  | 5.61E-01 | 1 |
| LAS1L   | 321325  | NaN | 10  | 1909584 | 503028  | 0 | 7  | 1 | 0 | 50 | 67 | 23589984 | 5.61E-01 | 1 |
| SKP2    | 174910  | 599 | -4  | 1238524 | 349592  | 0 | 4  | 0 | 0 | 50 | 57 | 22147116 | 5.61E-01 | 1 |
| FTMT    | 70878   | 920 | -16 | 597368  | 183340  | 0 | 2  | 0 | 0 | 50 | 63 | 20452556 | 5.61E-01 | 1 |
| ZNF366  | 447936  | 344 | 28  | 1896056 | 508012  | 0 | 5  | 1 | 0 | 28 | 27 | 11147428 | 5.61E-01 | 1 |
| SCGB2A2 | 3058870 | 450 | 42  | 253116  | 58740   | 0 | 1  | 0 | 0 | 50 | 51 | 16305156 | 5.61E-01 | 1 |
| NFKBIE  | 1037256 | 312 | 54  | 1199720 | 428980  | 0 | 4  | 1 | 0 | 50 | 68 | 19769036 | 5.61E-01 | 1 |
| NDUFA9  | 277828  | 874 | 18  | 979712  | 276256  | 0 | 4  | 2 | 0 | 4  | 6  | 2002144  | 5.61E-01 | 1 |
| AMTN    | 264427  | 861 | 27  | 538272  | 168744  | 0 | 2  | 1 | 0 | 34 | 56 | 17305872 | 5.61E-01 | 1 |
| C1orf64 | 886121  | 197 | 43  | 412604  | 138484  | 0 | 1  | 0 | 0 | 50 | 55 | 20099048 | 5.61E-01 | 1 |
| OR8B8   | 171093  | 824 | -10 | 772520  | 226060  | 0 | 3  | 2 | 0 | 7  | 13 | 3002860  | 5.61E-01 | 1 |
| BICD2   | 573438  | 393 | 45  | 2140628 | 638308  | 0 | 6  | 3 | 0 | 21 | 26 | 10140660 | 5.61E-01 | 1 |
| PITPNA  | 1362942 | 220 | 31  | 743684  | 171592  | 0 | 1  | 0 | 0 | 50 | 63 | 19643724 | 5.61E-01 | 1 |
| CCDC25  | 380493  | 229 | 27  | 583484  | 120328  | 0 | 1  | 0 | 0 | 50 | 66 | 26294872 | 5.61E-01 | 1 |
| ZNF667  | 135115  | 713 | -50 | 1585980 | 388752  | 0 | 7  | 1 | 0 | 10 | 32 | 8144212  | 5.61E-01 | 1 |
| BRPF1   | 955408  | 348 | 34  | 3103252 | 864368  | 0 | 8  | 2 | 0 | 8  | 11 | 5725192  | 5.62E-01 | 1 |
| KRTCAP3 | 1244404 | 179 | 39  | 592740  | 207192  | 0 | 2  | 1 | 0 | 50 | 61 | 21622372 | 5.62E-01 | 1 |
| RAB8A   | 761374  | 298 | 42  | 558208  | 138128  | 0 | 2  | 0 | 0 | 50 | 57 | 18801428 | 5.62E-01 | 1 |
| CCRL2   | 243983  | 625 | 36  | 891424  | 256676  | 0 | 3  | 0 | 0 | 50 | 49 | 17267068 | 5.62E-01 | 1 |

|          |         |     |     |         |         |   |    |   |   |    |     |          |          |   |
|----------|---------|-----|-----|---------|---------|---|----|---|---|----|-----|----------|----------|---|
| TNFAIP1  | 1405196 | 214 | 10  | 810968  | 226060  | 0 | 3  | 1 | 0 | 50 | 74  | 22499912 | 5.62E-01 | 1 |
| CCDC110  | 173409  | 422 | 20  | 2192960 | 506944  | 0 | 6  | 2 | 0 | 50 | 51  | 19200504 | 5.62E-01 | 1 |
| PLXNB2   | 939384  | 257 | 70  | 4667872 | 1373804 | 0 | 15 | 5 | 0 | 5  | 9   | 3295492  | 5.62E-01 | 1 |
| KCNA6    | 277089  | 903 | 16  | 1283024 | 415096  | 0 | 6  | 3 | 0 | 23 | 39  | 11011792 | 5.62E-01 | 1 |
| TFB2M    | 389456  | 409 | 4   | 1024924 | 276968  | 0 | 3  | 1 | 0 | 50 | 50  | 20658324 | 5.62E-01 | 1 |
| SPAG17   | 192120  | 741 | -7  | 5859404 | 1471348 | 0 | 27 | 4 | 0 | 7  | 9   | 3873280  | 5.62E-01 | 1 |
| LRP5L    | 155932  | 535 | -31 | 642224  | 181204  | 0 | 2  | 2 | 0 | 4  | 9   | 1789612  | 5.62E-01 | 1 |
| PMS2     | NaN     | NaN | NaN | 2233544 | 593452  | 0 | 7  | 1 | 0 | 50 | 117 | 40239036 | 5.63E-01 | 1 |
| DMRT2    | 71695   | 845 | 4   | 1448208 | 428268  | 0 | 4  | 0 | 0 | 10 | 7   | 3347824  | 5.63E-01 | 1 |
| TOPBP1   | 406166  | 396 | 37  | 3954092 | 1040944 | 0 | 14 | 1 | 0 | 1  | 1   | 1408692  | 5.63E-01 | 1 |
| TMEM107  | 1381225 | 202 | 37  | 376648  | 111428  | 0 | 1  | 0 | 0 | 50 | 76  | 28183808 | 5.63E-01 | 1 |
| NINL     | 613303  | 454 | -26 | 3527604 | 1001784 | 0 | 13 | 2 | 0 | 32 | 36  | 12571072 | 5.63E-01 | 1 |
| NOC3L    | 242278  | 482 | 12  | 2125676 | 528304  | 0 | 9  | 0 | 0 | 22 | 20  | 7593836  | 5.63E-01 | 1 |
| ATF2     | 347113  | 641 | 24  | 1299400 | 373088  | 0 | 2  | 1 | 0 | 50 | 49  | 22377092 | 5.63E-01 | 1 |
| GPX1     | 1661046 | 201 | 34  | 527236  | 178712  | 0 | 2  | 1 | 0 | 42 | 56  | 17031752 | 5.63E-01 | 1 |
| C2orf40  | 99910   | 798 | 0   | 386616  | 103596  | 0 | 1  | 0 | 0 | 50 | 55  | 21162064 | 5.63E-01 | 1 |
| PIWIL1   | 224466  | 621 | -26 | 2251700 | 595588  | 0 | 10 | 3 | 0 | 23 | 52  | 12737680 | 5.63E-01 | 1 |
| PPP3CA   | 84583   | 574 | 5   | 1378432 | 349592  | 0 | 6  | 0 | 0 | 8  | 9   | 3705960  | 5.63E-01 | 1 |
| TP53I3   | 269570  | 385 | 38  | 833040  | 255252  | 0 | 3  | 1 | 0 | 50 | 60  | 20133936 | 5.63E-01 | 1 |
| OR1K1    | 433740  | 487 | 10  | 754720  | 259880  | 0 | 2  | 1 | 0 | 50 | 48  | 19317628 | 5.63E-01 | 1 |
| OR10A2   | 427462  | 681 | 8   | 741904  | 232112  | 0 | 4  | 2 | 0 | 9  | 7   | 2352448  | 5.63E-01 | 1 |
| ECE1     | 744763  | 196 | 27  | 2125676 | 580636  | 0 | 5  | 1 | 0 | 21 | 24  | 11283776 | 5.63E-01 | 1 |
| MTMR1    | 288573  | NaN | 9   | 1730872 | 467072  | 0 | 7  | 0 | 0 | 15 | 14  | 5514084  | 5.63E-01 | 1 |
| ENTHD1   | 818387  | 503 | 24  | 1545396 | 423996  | 0 | 7  | 2 | 0 | 35 | 44  | 14686424 | 5.64E-01 | 1 |
| MASP1    | 401220  | 445 | 31  | 2609836 | 702032  | 0 | 7  | 3 | 0 | 21 | 18  | 10490608 | 5.64E-01 | 1 |
| GSTO1    | 293891  | 376 | 8   | 639376  | 161624  | 0 | 2  | 0 | 0 | 50 | 51  | 20513788 | 5.64E-01 | 1 |
| CLDN11   | 372782  | 377 | 30  | 505520  | 169456  | 0 | 1  | 0 | 0 | 50 | 40  | 20393104 | 5.64E-01 | 1 |
| SLC25A14 | 301928  | NaN | 28  | 851552  | 231400  | 0 | 1  | 0 | 0 | 50 | 75  | 26309824 | 5.64E-01 | 1 |
| MS4A3    | 336373  | 691 | 4   | 553936  | 160556  | 0 | 3  | 2 | 0 | 12 | 16  | 3983640  | 5.64E-01 | 1 |
| FIBIN    | 176115  | 648 | -17 | 527592  | 151656  | 0 | 1  | 0 | 0 | 50 | 64  | 25560444 | 5.64E-01 | 1 |
| TACC3    | 867402  | 350 | 39  | 2134220 | 616948  | 0 | 6  | 3 | 0 | 50 | 61  | 21170964 | 5.65E-01 | 1 |
| WDR47    | 942575  | 216 | 19  | 2399796 | 633324  | 0 | 8  | 1 | 0 | 26 | 24  | 11645828 | 5.65E-01 | 1 |
| MUC21    | 2483101 | 261 | 36  | 1362768 | 462444  | 0 | 4  | 0 | 0 | 24 | 19  | 9039552  | 5.65E-01 | 1 |

|           |         |      |     |         |         |   |    |   |   |    |    |          |          |   |
|-----------|---------|------|-----|---------|---------|---|----|---|---|----|----|----------|----------|---|
| SIRT3     | 1463610 | 437  | 24  | 991460  | 317908  | 0 | 2  | 0 | 0 | 6  | 2  | 2533652  | 5.65E-01 | 1 |
| QSER1     | 408746  | 172  | 23  | 4368120 | 1241016 | 0 | 13 | 1 | 0 | 0  | 1  | 1241016  | 5.65E-01 | 1 |
| SNRNP35   | 1090769 | 424  | 50  | 633324  | 180492  | 0 | 2  | 0 | 0 | 50 | 69 | 22305892 | 5.65E-01 | 1 |
| NUDT7     | 79181   | 1194 | -24 | 607336  | 173372  | 0 | 4  | 1 | 0 | 4  | 9  | 1560704  | 5.65E-01 | 1 |
| SV2C      | 171171  | 858  | 16  | 1889292 | 495552  | 0 | 6  | 2 | 0 | 50 | 50 | 17421928 | 5.65E-01 | 1 |
| POTEA     | 236622  | 755  | -37 | 1331440 | 320756  | 0 | 2  | 0 | 0 | 32 | 52 | 15813520 | 5.65E-01 | 1 |
| EPHX4     | 260329  | 242  | 1   | 938060  | 250624  | 0 | 2  | 1 | 0 | 50 | 39 | 21744124 | 5.65E-01 | 1 |
| PCDH8     | 248822  | 638  | 27  | 2539348 | 900680  | 0 | 13 | 5 | 0 | 23 | 23 | 7127832  | 5.65E-01 | 1 |
| RALGPS2   | 364466  | 434  | -2  | 1567112 | 385192  | 0 | 4  | 0 | 0 | 35 | 29 | 14994720 | 5.65E-01 | 1 |
| BNIP1     | 483076  | 397  | 34  | 707728  | 189392  | 0 | 2  | 0 | 0 | 50 | 49 | 20240736 | 5.65E-01 | 1 |
| SNRPD1    | 301496  | 165  | 46  | 309008  | 88288   | 0 | 1  | 0 | 0 | 50 | 46 | 17182340 | 5.65E-01 | 1 |
| WNT2B     | 561338  | 355  | 21  | 1077612 | 335352  | 0 | 3  | 1 | 0 | 50 | 57 | 24552964 | 5.66E-01 | 1 |
| CCDC125   | 434060  | 261  | 49  | 1371668 | 313636  | 0 | 3  | 1 | 0 | 50 | 55 | 20040308 | 5.66E-01 | 1 |
| ANKRD27   | 369667  | 455  | -38 | 2741912 | 745108  | 0 | 12 | 2 | 0 | 50 | 66 | 17430472 | 5.66E-01 | 1 |
| TAS2R40   | 379894  | 399  | 14  | 802068  | 234960  | 0 | 3  | 1 | 0 | 50 | 67 | 22890088 | 5.66E-01 | 1 |
| CHMP6     | 1660463 | 211  | 27  | 541120  | 138128  | 0 | 2  | 1 | 0 | 33 | 46 | 14482792 | 5.66E-01 | 1 |
| OAZ1      | 1603571 | 240  | 27  | 583128  | 170880  | 0 | 2  | 0 | 0 | 50 | 66 | 21932448 | 5.66E-01 | 1 |
| HSP90B1   | 1190703 | 281  | 40  | 2120692 | 527948  | 0 | 10 | 4 | 0 | 15 | 23 | 6446448  | 5.66E-01 | 1 |
| APOL2     | 1237332 | 331  | 42  | 844788  | 250980  | 0 | 5  | 2 | 0 | 8  | 28 | 6483472  | 5.66E-01 | 1 |
| TIPIN     | 505508  | 307  | 46  | 798508  | 199004  | 0 | 2  | 0 | 0 | 50 | 49 | 21873708 | 5.66E-01 | 1 |
| TREM1     | 270628  | 607  | 34  | 592028  | 175864  | 0 | 2  | 0 | 0 | 34 | 31 | 10799972 | 5.66E-01 | 1 |
| PEX5L     | 307645  | 761  | 5   | 1631904 | 436812  | 0 | 5  | 1 | 0 | 50 | 70 | 24161720 | 5.66E-01 | 1 |
| OTUD3     | 437659  | 348  | 22  | 1041656 | 266644  | 0 | 1  | 0 | 0 | 50 | 42 | 18701748 | 5.66E-01 | 1 |
| TTC13     | 407409  | 595  | 14  | 2254904 | 599860  | 0 | 9  | 1 | 0 | 50 | 67 | 22042096 | 5.66E-01 | 1 |
| P2RY13    | 67416   | 548  | 15  | 892848  | 250980  | 0 | 3  | 1 | 0 | 50 | 59 | 22461820 | 5.67E-01 | 1 |
| MLNR      | 321392  | 424  | 51  | 974016  | 351372  | 0 | 3  | 0 | 0 | 38 | 47 | 18334712 | 5.67E-01 | 1 |
| WNT5B     | 270921  | 254  | 34  | 913140  | 257388  | 0 | 3  | 0 | 0 | 34 | 29 | 10410864 | 5.67E-01 | 1 |
| DAZAP1    | 2352825 | 221  | 38  | 1132436 | 321112  | 0 | 2  | 1 | 0 | 50 | 55 | 18329728 | 5.67E-01 | 1 |
| XAF1      | 936146  | 438  | 5   | 800288  | 192952  | 0 | 3  | 1 | 0 | 50 | 45 | 14808532 | 5.67E-01 | 1 |
| EPHB3     | 1325702 | 411  | 47  | 2510512 | 754364  | 0 | 10 | 4 | 0 | 9  | 14 | 4999664  | 5.67E-01 | 1 |
| IIST1H2AI | 408919  | 685  | 43  | 313992  | 107868  | 0 | 1  | 0 | 0 | 50 | 57 | 16881520 | 5.67E-01 | 1 |
| NCR2      | 338294  | 510  | 40  | 694556  | 214312  | 0 | 2  | 1 | 0 | 50 | 50 | 17742328 | 5.67E-01 | 1 |
| NPC1      | 347696  | 164  | 64  | 3289440 | 911004  | 0 | 9  | 2 | 0 | 21 | 28 | 10525852 | 5.67E-01 | 1 |

|          |         |      |     |         |        |   |    |   |   |    |     |          |          |   |
|----------|---------|------|-----|---------|--------|---|----|---|---|----|-----|----------|----------|---|
| OR8K1    | 10293   | 963  | -36 | 792456  | 230688 | 0 | 6  | 0 | 0 | 50 | 115 | 24676496 | 5.67E-01 | 1 |
| NDUFS6   | 387770  | 635  | 11  | 322536  | 92916  | 0 | 1  | 0 | 0 | 50 | 63  | 21058112 | 5.67E-01 | 1 |
| MAP2K1   | 506284  | 172  | 43  | 1029196 | 278036 | 0 | 2  | 0 | 0 | 50 | 52  | 17050264 | 5.67E-01 | 1 |
| SLAIN2   | 310987  | 328  | 55  | 1454260 | 440372 | 0 | 5  | 0 | 0 | 14 | 10  | 3880400  | 5.67E-01 | 1 |
| HOXB1    | 946208  | 524  | 29  | 743684  | 232468 | 0 | 5  | 3 | 0 | 16 | 19  | 4118564  | 5.68E-01 | 1 |
| DHX9     | 673873  | 517  | 23  | 3290152 | 897476 | 0 | 17 | 1 | 0 | 0  | 1   | 897476   | 5.68E-01 | 1 |
| SLC9A4   | 184297  | 671  | 6   | 2038456 | 568532 | 0 | 11 | 4 | 0 | 2  | 4   | 1069424  | 5.68E-01 | 1 |
| LRRN4    | 301252  | 351  | -6  | 1771456 | 619796 | 0 | 4  | 2 | 0 | 23 | 18  | 10367788 | 5.68E-01 | 1 |
| SUFU     | 872436  | 165  | 36  | 1253476 | 356000 | 0 | 4  | 2 | 0 | 50 | 52  | 20342196 | 5.68E-01 | 1 |
| SLC22A14 | 301168  | 437  | 22  | 1503744 | 443220 | 0 | 3  | 3 | 0 | 46 | 67  | 19788972 | 5.68E-01 | 1 |
| LIMA1    | 1008076 | 144  | 57  | 1970816 | 510148 | 0 | 6  | 5 | 0 | 22 | 26  | 7897860  | 5.68E-01 | 1 |
| RAB3B    | 701660  | 353  | 22  | 567108  | 152724 | 0 | 5  | 1 | 0 | 1  | 3   | 843720   | 5.68E-01 | 1 |
| NTHL1    | 1747301 | 183  | 46  | 787116  | 239232 | 0 | 2  | 1 | 0 | 50 | 75  | 19137492 | 5.68E-01 | 1 |
| COASY    | 1884163 | 177  | 38  | 1479180 | 466716 | 0 | 4  | 1 | 0 | 50 | 68  | 23826724 | 5.68E-01 | 1 |
| DDX19A   | 1126886 | 134  | 44  | 1258104 | 325740 | 0 | 4  | 1 | 0 | 50 | 59  | 22331524 | 5.68E-01 | 1 |
| PLCB1    | 85844   | 872  | -34 | 3320768 | 825208 | 0 | 15 | 2 | 0 | 33 | 34  | 12189796 | 5.68E-01 | 1 |
| CXCR6    | NaN     | NaN  | NaN | 861164  | 242080 | 0 | 3  | 0 | 0 | 50 | 116 | 39887664 | 5.68E-01 | 1 |
| ITGA2B   | 1062294 | 172  | 38  | 2656828 | 801356 | 0 | 10 | 3 | 0 | 50 | 71  | 23775460 | 5.68E-01 | 1 |
| ACTR3B   | 190917  | 535  | 5   | 1098260 | 291208 | 0 | 2  | 0 | 0 | 50 | 53  | 20518060 | 5.68E-01 | 1 |
| OR4K14   | 420010  | 827  | -51 | 767180  | 228196 | 0 | 2  | 0 | 0 | 42 | 60  | 13737684 | 5.68E-01 | 1 |
| S1PR1    | 190734  | 597  | 4   | 934500  | 292632 | 0 | 8  | 4 | 0 | 3  | 6   | 1120332  | 5.68E-01 | 1 |
| CA6      | 840956  | 264  | 31  | 808476  | 213600 | 0 | 1  | 0 | 0 | 50 | 62  | 20541556 | 5.68E-01 | 1 |
| TPTE2    | 288628  | 778  | -16 | 1414388 | 346744 | 0 | 5  | 0 | 0 | 38 | 41  | 12380612 | 5.68E-01 | 1 |
| IFIT5    | 253827  | 213  | 17  | 1227844 | 323960 | 0 | 4  | 0 | 0 | 44 | 34  | 14070544 | 5.68E-01 | 1 |
| GDAP1    | 230695  | 529  | -14 | 929872  | 245996 | 0 | 4  | 2 | 0 | 50 | 67  | 21547968 | 5.68E-01 | 1 |
| MAP1LC3E | 583365  | 363  | 27  | 333216  | 83304  | 0 | 1  | 0 | 0 | 50 | 48  | 19133220 | 5.69E-01 | 1 |
| SLC39A7  | 1474628 | 377  | 24  | 1170172 | 365612 | 0 | 6  | 0 | 0 | 22 | 42  | 9267748  | 5.69E-01 | 1 |
| FBXO5    | 164387  | 538  | -5  | 1144540 | 307940 | 0 | 3  | 1 | 0 | 50 | 71  | 23025368 | 5.69E-01 | 1 |
| UBE2Q2   | 560951  | 339  | 55  | 1123892 | 275188 | 0 | 4  | 0 | 0 | 50 | 55  | 20947040 | 5.69E-01 | 1 |
| RASGEF1C | 1740168 | 432  | 23  | 1214672 | 337132 | 0 | 4  | 2 | 0 | 50 | 39  | 15917472 | 5.69E-01 | 1 |
| TFAP2D   | 17771   | 1090 | -15 | 1143472 | 337844 | 0 | 3  | 1 | 0 | 50 | 83  | 24114728 | 5.69E-01 | 1 |
| DLX4     | 1160590 | 191  | 12  | 639376  | 210752 | 0 | 2  | 1 | 0 | 36 | 34  | 13080508 | 5.69E-01 | 1 |
| SDR42E1  | 207928  | 635  | 13  | 976508  | 294412 | 0 | 3  | 1 | 0 | 50 | 63  | 25699996 | 5.69E-01 | 1 |



|           |         |      |     |         |         |   |    |   |   |    |    |          |          |   |
|-----------|---------|------|-----|---------|---------|---|----|---|---|----|----|----------|----------|---|
| C9orf50   | 886775  | 205  | 39  | 1055184 | 354576  | 0 | 5  | 0 | 0 | 50 | 69 | 20923544 | 5.69E-01 | 1 |
| KIAA1586  | 431412  | 348  | 29  | 2019944 | 517624  | 0 | 4  | 0 | 0 | 12 | 4  | 4275560  | 5.69E-01 | 1 |
| ADK       | 622159  | 598  | 40  | 981848  | 243148  | 0 | 2  | 1 | 0 | 50 | 73 | 25680060 | 5.69E-01 | 1 |
| DCLRE1B   | 335231  | 545  | 13  | 1325388 | 395160  | 0 | 6  | 1 | 0 | 50 | 60 | 19779004 | 5.70E-01 | 1 |
| C5orf22   | 235664  | 649  | 4   | 1152016 | 301532  | 0 | 3  | 0 | 0 | 50 | 46 | 21343980 | 5.70E-01 | 1 |
| TDRD1     | 279026  | 477  | 22  | 3139208 | 780352  | 0 | 8  | 3 | 0 | 50 | 61 | 22629140 | 5.70E-01 | 1 |
| MAP3K12   | 1712232 | 191  | 56  | 2140628 | 676756  | 0 | 11 | 1 | 0 | 6  | 6  | 2296912  | 5.70E-01 | 1 |
| SLC4A1AF  | 1116452 | 205  | 37  | 2061596 | 547528  | 0 | 6  | 3 | 0 | 16 | 14 | 5946980  | 5.70E-01 | 1 |
| PRRG2     | 2080142 | 210  | 41  | 515132  | 160912  | 0 | 2  | 0 | 0 | 50 | 75 | 21834192 | 5.70E-01 | 1 |
| ADAM22    | 178742  | 722  | 17  | 2511580 | 626204  | 0 | 7  | 3 | 0 | 50 | 49 | 19395948 | 5.70E-01 | 1 |
| BDP1      | 365874  | 516  | 16  | 6788208 | 1784628 | 0 | 30 | 3 | 0 | 4  | 11 | 3837680  | 5.70E-01 | 1 |
| ZNF141    | 427337  | 756  | 5   | 1243152 | 293700  | 0 | 5  | 0 | 0 | 50 | 68 | 24799316 | 5.70E-01 | 1 |
| ZNF420    | 262327  | 1018 | -64 | 1790680 | 429692  | 0 | 6  | 0 | 0 | 19 | 13 | 6434700  | 5.70E-01 | 1 |
| SLC25A23  | 865106  | 219  | 33  | 1180852 | 360272  | 0 | 5  | 1 | 0 | 50 | 76 | 20954160 | 5.70E-01 | 1 |
| IGF2BP2   | 928734  | 367  | 38  | 1558212 | 430404  | 0 | 5  | 1 | 0 | 29 | 29 | 10129624 | 5.70E-01 | 1 |
| DLGAP5    | 764452  | 146  | 54  | 2302252 | 588824  | 0 | 9  | 2 | 0 | 43 | 74 | 18012532 | 5.70E-01 | 1 |
| ZNF718    | 270777  | 858  | 0   | 1248136 | 299396  | 0 | 5  | 0 | 0 | 50 | 55 | 20432264 | 5.70E-01 | 1 |
| SHROOM2   | 157955  | NaN  | 0   | 3972960 | 1248492 | 0 | 9  | 0 | 0 | 0  | 0  | 1248492  | 5.70E-01 | 1 |
| ATPAF1    | 612038  | 266  | 23  | 847992  | 240300  | 0 | 3  | 1 | 0 | 50 | 52 | 18788968 | 5.70E-01 | 1 |
| CYP3A4    | 1430454 | 438  | 42  | 1321472 | 344608  | 0 | 7  | 2 | 0 | 3  | 9  | 3276268  | 5.70E-01 | 1 |
| YES1      | 398625  | 360  | 44  | 1416524 | 373444  | 0 | 5  | 1 | 0 | 50 | 49 | 21581076 | 5.71E-01 | 1 |
| ZNF431    | 173248  | 1093 | -42 | 1511932 | 353864  | 0 | 5  | 0 | 0 | 11 | 14 | 5145980  | 5.71E-01 | 1 |
| EPS8L2    | 1788356 | 193  | 48  | 1864372 | 515132  | 0 | 8  | 4 | 0 | 10 | 12 | 3053056  | 5.71E-01 | 1 |
| POTEC     | NaN     | NaN  | NaN | 1441444 | 341048  | 0 | 6  | 3 | 0 | 26 | 43 | 11918168 | 5.71E-01 | 1 |
| C15orf40  | 452169  | 683  | 19  | 869352  | 237096  | 0 | 3  | 1 | 0 | 34 | 45 | 17843788 | 5.71E-01 | 1 |
| VCX2      | 30870   | NaN  | -19 | 351728  | 103240  | 0 | 1  | 0 | 0 | 50 | 66 | 19882956 | 5.71E-01 | 1 |
| POU3F3    | 165707  | 869  | -17 | 1199364 | 404772  | 0 | 3  | 0 | 0 | 31 | 55 | 18221860 | 5.71E-01 | 1 |
| SRM       | 577167  | 408  | 34  | 788540  | 214312  | 0 | 2  | 1 | 0 | 50 | 47 | 21558292 | 5.71E-01 | 1 |
| LAIR1     | 742939  | 507  | -9  | 745820  | 215380  | 0 | 3  | 1 | 0 | 50 | 62 | 17969100 | 5.71E-01 | 1 |
| C14orf105 | 150716  | 939  | 15  | 783912  | 189036  | 0 | 3  | 1 | 0 | 50 | 53 | 18773304 | 5.71E-01 | 1 |
| CA14      | 1213150 | 197  | 38  | 883236  | 242436  | 0 | 1  | 0 | 0 | 50 | 58 | 21071640 | 5.72E-01 | 1 |
| SDCCAG3   | 1303729 | 233  | 36  | 1112856 | 322536  | 0 | 3  | 0 | 0 | 49 | 69 | 21284528 | 5.72E-01 | 1 |
| ZDHHC14   | 272499  | 402  | 35  | 1239948 | 360984  | 0 | 4  | 3 | 0 | 34 | 28 | 11230732 | 5.72E-01 | 1 |

|          |         |     |     |          |         |   |    |   |   |    |    |          |          |   |
|----------|---------|-----|-----|----------|---------|---|----|---|---|----|----|----------|----------|---|
| TRPC3    | 324047  | 634 | -3  | 2363840  | 641512  | 0 | 6  | 2 | 0 | 50 | 55 | 19154580 | 5.72E-01 | 1 |
| ZNF764   | 2214934 | 142 | 54  | 1001784  | 317196  | 0 | 4  | 0 | 0 | 50 | 72 | 21947756 | 5.72E-01 | 1 |
| FBXO8    | 64734   | 647 | -5  | 837312   | 209328  | 0 | 2  | 0 | 0 | 50 | 45 | 20526604 | 5.72E-01 | 1 |
| ANKRD2   | 564805  | 169 | 40  | 915632   | 275188  | 0 | 3  | 0 | 0 | 50 | 62 | 20233616 | 5.72E-01 | 1 |
| NR1I2    | 422482  | 474 | 24  | 1221792  | 333216  | 0 | 3  | 2 | 0 | 8  | 9  | 3838036  | 5.72E-01 | 1 |
| HSPA12A  | 198263  | 480 | -15 | 1720548  | 492348  | 0 | 6  | 2 | 0 | 34 | 36 | 10838064 | 5.72E-01 | 1 |
| FRAS1    | 244829  | 726 | 0   | 10436852 | 2812756 | 0 | 29 | 9 | 0 | 50 | 61 | 25037480 | 5.72E-01 | 1 |
| COX18    | 255276  | 747 | 14  | 826632   | 264864  | 0 | 1  | 0 | 0 | 50 | 63 | 21904680 | 5.72E-01 | 1 |
| DEFB129  | 1010597 | 348 | 24  | 468496   | 127448  | 0 | 2  | 0 | 0 | 50 | 85 | 21827784 | 5.72E-01 | 1 |
| TPPP     | 683895  | 411 | 28  | 552512   | 165184  | 0 | 2  | 1 | 0 | 31 | 37 | 12084064 | 5.72E-01 | 1 |
| ZMAT4    | 42867   | 678 | -14 | 605556   | 156996  | 0 | 2  | 1 | 0 | 18 | 27 | 9385940  | 5.72E-01 | 1 |
| HIGD2A   | 576954  | 347 | 45  | 262728   | 86508   | 0 | 2  | 2 | 0 | 3  | 5  | 710932   | 5.73E-01 | 1 |
| C1orf115 | 447403  | 520 | -11 | 344252   | 118192  | 0 | 1  | 0 | 0 | 50 | 71 | 22983716 | 5.73E-01 | 1 |
| PSAT1    | 248468  | 637 | -20 | 965472   | 259524  | 0 | 4  | 2 | 0 | 16 | 22 | 5553600  | 5.73E-01 | 1 |
| SIT1     | 1202125 | 248 | 37  | 493772   | 156640  | 0 | 1  | 0 | 0 | 50 | 57 | 20786840 | 5.73E-01 | 1 |
| CYP2A6   | 1187304 | 275 | 31  | 1271632  | 350660  | 0 | 7  | 3 | 0 | 17 | 19 | 5409776  | 5.73E-01 | 1 |
| PALMD    | 272208  | 540 | -15 | 1433256  | 365256  | 0 | 7  | 0 | 0 | 47 | 86 | 24147124 | 5.73E-01 | 1 |
| CTGF     | 169902  | 699 | -4  | 893204   | 245284  | 0 | 4  | 0 | 0 | 19 | 23 | 8560376  | 5.73E-01 | 1 |
| HVCN1    | 827901  | 194 | 41  | 711644   | 191884  | 0 | 2  | 1 | 0 | 50 | 44 | 18392740 | 5.73E-01 | 1 |
| DPEP1    | 1092575 | 211 | 38  | 1047708  | 310788  | 0 | 2  | 1 | 0 | 50 | 48 | 15460724 | 5.74E-01 | 1 |
| RNF215   | 696089  | 214 | 57  | 931652   | 313636  | 0 | 4  | 1 | 0 | 47 | 74 | 22296992 | 5.74E-01 | 1 |
| IMPDH2   | 1799657 | 241 | 41  | 1337848  | 372020  | 0 | 7  | 3 | 0 | 25 | 50 | 13524440 | 5.74E-01 | 1 |
| PRMT8    | 227736  | 768 | 15  | 1043436  | 260592  | 0 | 3  | 0 | 0 | 50 | 47 | 19037812 | 5.74E-01 | 1 |
| IFNA1    | 242654  | 411 | -6  | 479888   | 131008  | 0 | 1  | 0 | 0 | 50 | 34 | 19573236 | 5.74E-01 | 1 |
| RUNDC3B  | 287293  | 839 | -3  | 1239592  | 326096  | 0 | 3  | 0 | 0 | 50 | 54 | 19694632 | 5.74E-01 | 1 |
| FABP12   | 186546  | 595 | 0   | 369528   | 92916   | 0 | 1  | 0 | 0 | 50 | 46 | 20081248 | 5.74E-01 | 1 |
| KCNQ1    | 812471  | 589 | 39  | 1708800  | 531864  | 0 | 3  | 0 | 0 | 18 | 11 | 6741572  | 5.74E-01 | 1 |
| C11orf84 | 1320765 | 201 | 47  | 956216   | 289072  | 0 | 3  | 0 | 0 | 50 | 62 | 23459332 | 5.74E-01 | 1 |
| RNF135   | 585832  | 178 | 25  | 1160560  | 317552  | 0 | 4  | 2 | 0 | 38 | 52 | 18401640 | 5.74E-01 | 1 |
| FKBP2    | 1613996 | 257 | 65  | 371308   | 108224  | 0 | 2  | 1 | 0 | 19 | 29 | 6446448  | 5.74E-01 | 1 |
| DACT1    | 303507  | 489 | 32  | 2055900  | 638664  | 0 | 5  | 2 | 0 | 50 | 53 | 20004352 | 5.74E-01 | 1 |
| SELENBP1 | 1322568 | 174 | 42  | 1220012  | 344608  | 0 | 5  | 2 | 0 | 50 | 77 | 23375672 | 5.75E-01 | 1 |
| CCT6A    | 738325  | 642 | 4   | 1377364  | 382700  | 0 | 4  | 0 | 0 | 18 | 12 | 6589560  | 5.75E-01 | 1 |

|          |         |     |     |         |         |   |    |   |   |    |     |          |          |   |
|----------|---------|-----|-----|---------|---------|---|----|---|---|----|-----|----------|----------|---|
| GPRC5C   | 491117  | 504 | 7   | 1203280 | 378428  | 0 | 2  | 2 | 0 | 50 | 50  | 18209400 | 5.75E-01 | 1 |
| TFSM     | 1160849 | 344 | 39  | 941264  | 282664  | 0 | 3  | 0 | 0 | 50 | 87  | 20175588 | 5.75E-01 | 1 |
| TAF12    | 816470  | 183 | 25  | 427200  | 113208  | 0 | 1  | 0 | 0 | 50 | 51  | 20622368 | 5.75E-01 | 1 |
| POLR1C   | 1278255 | 230 | 56  | 987900  | 278748  | 0 | 4  | 1 | 0 | 50 | 54  | 19955936 | 5.75E-01 | 1 |
| CD300C   | 698491  | 504 | 10  | 562836  | 170880  | 0 | 2  | 0 | 0 | 50 | 63  | 19807128 | 5.75E-01 | 1 |
| DSCR3    | 349267  | 263 | 58  | 770384  | 214312  | 0 | 3  | 1 | 0 | 50 | 62  | 20638388 | 5.75E-01 | 1 |
| KBTBD3   | 86519   | 753 | -16 | 1572808 | 399788  | 0 | 5  | 2 | 0 | 22 | 34  | 10023536 | 5.75E-01 | 1 |
| BOC      | 437186  | 634 | 21  | 2803856 | 847636  | 0 | 12 | 4 | 0 | 49 | 59  | 18144964 | 5.75E-01 | 1 |
| BARHL1   | 1522970 | 581 | 37  | 794592  | 264864  | 0 | 3  | 2 | 0 | 4  | 6   | 2003212  | 5.75E-01 | 1 |
| HCFC1R1  | 1443513 | 234 | 49  | 353508  | 111072  | 0 | 1  | 1 | 0 | 46 | 45  | 16352504 | 5.75E-01 | 1 |
| PGR      | 23389   | 962 | -25 | 2289080 | 733360  | 0 | 8  | 2 | 0 | 23 | 42  | 14013584 | 5.75E-01 | 1 |
| ARID5A   | 872383  | 360 | 47  | 1476332 | 457816  | 0 | 5  | 2 | 0 | 50 | 94  | 27272092 | 5.76E-01 | 1 |
| ACSM2A   | 181483  | 823 | 6   | 1491640 | 415808  | 0 | 5  | 1 | 0 | 50 | 56  | 18359276 | 5.76E-01 | 1 |
| PRR23A   | NaN     | NaN | NaN | 629764  | 225704  | 0 | 2  | 1 | 0 | 50 | 117 | 39871288 | 5.76E-01 | 1 |
| ARHGAP24 | 29589   | 739 | 13  | 2043084 | 516912  | 0 | 4  | 0 | 0 | 34 | 30  | 15562184 | 5.76E-01 | 1 |
| LMF1     | 1167662 | 304 | 17  | 1433968 | 430760  | 0 | 3  | 2 | 0 | 50 | 67  | 23509172 | 5.76E-01 | 1 |
| DBN1     | 1079488 | 261 | 50  | 1736212 | 502316  | 0 | 4  | 1 | 0 | 50 | 44  | 16518044 | 5.76E-01 | 1 |
| HADH     | 230614  | 771 | 21  | 861520  | 236384  | 0 | 3  | 1 | 0 | 50 | 62  | 22670080 | 5.76E-01 | 1 |
| GUCY2F   | 131317  | NaN | 29  | 2846932 | 786404  | 0 | 6  | 0 | 0 | 31 | 27  | 18312640 | 5.76E-01 | 1 |
| RAI2     | 61797   | NaN | 26  | 1309012 | 396584  | 0 | 3  | 0 | 0 | 35 | 42  | 14749436 | 5.76E-01 | 1 |
| FCTEX1D2 | 1164213 | 231 | 36  | 381632  | 93628   | 0 | 1  | 0 | 0 | 50 | 38  | 16464644 | 5.76E-01 | 1 |
| IIST1H2A | 228884  | 634 | 40  | 314704  | 109292  | 0 | 1  | 2 | 0 | 13 | 15  | 2405492  | 5.76E-01 | 1 |
| GPR88    | 348181  | 846 | -6  | 883948  | 353864  | 0 | 2  | 1 | 0 | 50 | 66  | 21387056 | 5.77E-01 | 1 |
| ADRA2C   | 326572  | 592 | 36  | 1089716 | 395872  | 0 | 3  | 2 | 0 | 25 | 25  | 11882924 | 5.77E-01 | 1 |
| TECTA    | 243065  | 769 | 17  | 5500912 | 1498760 | 0 | 17 | 5 | 0 | 37 | 33  | 15863004 | 5.77E-01 | 1 |
| PARG     | 340607  | 454 | 28  | 2558572 | 644360  | 0 | 4  | 0 | 0 | 3  | 1   | 2304032  | 5.77E-01 | 1 |
| GIMAP4   | 563029  | 671 | 24  | 841228  | 224636  | 0 | 2  | 0 | 0 | 25 | 19  | 9400180  | 5.77E-01 | 1 |
| GAS7     | 91570   | 604 | -30 | 1304384 | 337132  | 0 | 6  | 0 | 0 | 50 | 111 | 24746628 | 5.77E-01 | 1 |
| OR4D5    | 107524  | 830 | -5  | 774656  | 247420  | 0 | 3  | 1 | 0 | 50 | 68  | 19655828 | 5.77E-01 | 1 |
| ARMC10   | 594757  | 579 | 34  | 870776  | 257032  | 0 | 3  | 0 | 0 | 50 | 70  | 23421240 | 5.77E-01 | 1 |
| PRPF38B  | 743461  | 225 | 9   | 1410472 | 363476  | 0 | 3  | 1 | 0 | 50 | 72  | 24119356 | 5.77E-01 | 1 |
| ACER3    | 279729  | 351 | 36  | 722324  | 179068  | 0 | 2  | 1 | 0 | 40 | 34  | 14093328 | 5.77E-01 | 1 |
| PPP1R14A | 1410213 | 301 | -1  | 374156  | 114988  | 0 | 1  | 0 | 0 | 50 | 46  | 17588892 | 5.77E-01 | 1 |

|         |         |     |     |         |         |   |    |   |   |    |     |          |          |   |
|---------|---------|-----|-----|---------|---------|---|----|---|---|----|-----|----------|----------|---|
| PAK1IP1 | 262380  | 410 | 14  | 1041300 | 258456  | 0 | 3  | 1 | 0 | 50 | 53  | 22408420 | 5.77E-01 | 1 |
| PSMC5   | 1446139 | 380 | 27  | 1058744 | 296548  | 0 | 3  | 1 | 0 | 50 | 63  | 18745892 | 5.77E-01 | 1 |
| PIM2    | 834040  | NaN | 38  | 773588  | 247420  | 0 | 1  | 0 | 0 | 50 | 43  | 14994364 | 5.77E-01 | 1 |
| MIER3   | 201203  | 393 | 41  | 1458176 | 357424  | 0 | 5  | 0 | 0 | 2  | 0   | 803136   | 5.77E-01 | 1 |
| AGBL1   | 5624    | 980 | -56 | 2769680 | 747244  | 0 | 8  | 3 | 0 | 29 | 36  | 11390932 | 5.78E-01 | 1 |
| CASQ2   | 287179  | 639 | 8   | 1076544 | 247776  | 0 | 5  | 1 | 0 | 50 | 70  | 19878328 | 5.78E-01 | 1 |
| SLAIN1  | 131557  | 900 | 38  | 896764  | 250268  | 0 | 4  | 0 | 0 | 50 | 64  | 20840240 | 5.78E-01 | 1 |
| SLC3A1  | 433205  | 522 | 29  | 1787120 | 451408  | 0 | 2  | 0 | 0 | 26 | 13  | 9889680  | 5.78E-01 | 1 |
| RRAGA   | 500397  | 450 | -27 | 789608  | 216448  | 0 | 3  | 1 | 0 | 50 | 61  | 18541548 | 5.78E-01 | 1 |
| DSN1    | 794301  | 231 | 64  | 949808  | 236740  | 0 | 3  | 0 | 0 | 15 | 15  | 6166988  | 5.78E-01 | 1 |
| ERAS    | 823539  | NaN | 29  | 569244  | 180492  | 0 | 2  | 0 | 0 | 50 | 93  | 24512736 | 5.78E-01 | 1 |
| CSHL1   | 1446139 | 380 | 27  | 583484  | 154504  | 0 | 2  | 1 | 0 | 50 | 63  | 18745892 | 5.78E-01 | 1 |
| RAD23B  | 255220  | 467 | 1   | 1051268 | 300820  | 0 | 2  | 0 | 0 | 50 | 69  | 25106544 | 5.79E-01 | 1 |
| ELAVL2  | 7648    | 719 | -40 | 926312  | 252760  | 0 | 4  | 0 | 0 | 49 | 97  | 27978040 | 5.79E-01 | 1 |
| PRB2    | 175992  | 673 | -18 | 996444  | 354576  | 0 | 3  | 0 | 0 | 15 | 35  | 9917804  | 5.79E-01 | 1 |
| MYH2    | 75573   | 738 | -49 | 5090088 | 1294416 | 0 | 20 | 4 | 0 | 13 | 33  | 9377040  | 5.79E-01 | 1 |
| UGCG    | 598588  | 172 | 14  | 1033112 | 266644  | 0 | 3  | 0 | 0 | 50 | 48  | 19178076 | 5.79E-01 | 1 |
| PPIP5K2 | 204934  | 549 | 16  | 3206848 | 833396  | 0 | 9  | 1 | 0 | 7  | 5   | 3173740  | 5.79E-01 | 1 |
| BCAP31  | 1716845 | NaN | 44  | 807408  | 228552  | 0 | 2  | 0 | 0 | 50 | 73  | 19103672 | 5.79E-01 | 1 |
| PPP1CB  | 483830  | 229 | 30  | 865080  | 220008  | 0 | 4  | 1 | 0 | 50 | 56  | 17934568 | 5.79E-01 | 1 |
| AMFR    | 498079  | 442 | -9  | 1646500 | 472412  | 0 | 3  | 1 | 0 | 35 | 43  | 14703512 | 5.79E-01 | 1 |
| FOXR2   | 89607   | NaN | 10  | 797796  | 201852  | 0 | 3  | 1 | 0 | 50 | 70  | 21092288 | 5.79E-01 | 1 |
| OTX1    | 240308  | 505 | 12  | 871132  | 274832  | 0 | 5  | 1 | 0 | 34 | 43  | 12973708 | 5.79E-01 | 1 |
| PNMA1   | 600464  | 191 | 47  | 875404  | 258812  | 0 | 3  | 2 | 0 | 41 | 49  | 16938124 | 5.79E-01 | 1 |
| EVC     | 101111  | 641 | 18  | 2537924 | 729088  | 0 | 8  | 0 | 0 | 1  | 0   | 1128520  | 5.80E-01 | 1 |
| CCDC141 | 163273  | 839 | 12  | 2287656 | 570312  | 0 | 13 | 1 | 0 | 18 | 27  | 7588496  | 5.80E-01 | 1 |
| TREX2   | 971101  | NaN | 7   | 563904  | 198648  | 0 | 2  | 0 | 0 | 50 | 42  | 13736972 | 5.80E-01 | 1 |
| ST8SIA2 | 288853  | 578 | -30 | 953724  | 272340  | 0 | 5  | 2 | 0 | 50 | 109 | 25194476 | 5.80E-01 | 1 |
| ZFYVE9  | 791018  | 448 | 19  | 3680328 | 970812  | 0 | 18 | 4 | 0 | 50 | 64  | 20020728 | 5.81E-01 | 1 |
| KYNU    | 48515   | 369 | 20  | 1254544 | 323960  | 0 | 2  | 0 | 0 | 24 | 32  | 12243552 | 5.81E-01 | 1 |
| DIABLO  | 846994  | 187 | 29  | 620152  | 170168  | 0 | 3  | 1 | 0 | 50 | 91  | 26931756 | 5.81E-01 | 1 |
| WDR41   | 269224  | 518 | 36  | 1207552 | 317552  | 0 | 4  | 0 | 0 | 42 | 36  | 14163460 | 5.81E-01 | 1 |
| FBXO27  | 1653595 | 282 | 32  | 705236  | 226060  | 0 | 3  | 2 | 0 | 30 | 33  | 10703140 | 5.81E-01 | 1 |

|          |         |      |     |         |         |   |    |   |   |    |     |          |          |   |
|----------|---------|------|-----|---------|---------|---|----|---|---|----|-----|----------|----------|---|
| DDX18    | 194969  | 760  | -7  | 1746892 | 460664  | 0 | 7  | 1 | 0 | 13 | 16  | 6240680  | 5.81E-01 | 1 |
| MED6     | 243988  | 706  | 29  | 661804  | 161624  | 0 | 2  | 0 | 0 | 50 | 52  | 20427636 | 5.81E-01 | 1 |
| UGT2A3   | NaN     | NaN  | NaN | 1354580 | 360628  | 0 | 5  | 2 | 0 | 50 | 118 | 40006212 | 5.81E-01 | 1 |
| SLC25A46 | 127798  | 846  | -7  | 1068000 | 306516  | 0 | 3  | 1 | 0 | 50 | 72  | 20427636 | 5.81E-01 | 1 |
| NEIL1    | 814680  | 296  | 43  | 991104  | 300108  | 0 | 2  | 0 | 0 | 50 | 63  | 19824928 | 5.81E-01 | 1 |
| EPB41L4B | 337644  | 371  | 15  | 2457112 | 696692  | 0 | 7  | 2 | 0 | 20 | 22  | 10181600 | 5.81E-01 | 1 |
| MAGIX    | 724395  | NaN  | 44  | 845856  | 293700  | 0 | 2  | 0 | 0 | 32 | 28  | 13371716 | 5.81E-01 | 1 |
| ITM2C    | 1020678 | 519  | 45  | 679960  | 200072  | 0 | 2  | 0 | 0 | 50 | 73  | 27243968 | 5.81E-01 | 1 |
| ZNF713   | 757446  | 584  | -6  | 1131012 | 264864  | 0 | 5  | 1 | 0 | 50 | 101 | 23105112 | 5.81E-01 | 1 |
| NRG3     | 5107    | 1174 | -53 | 1941268 | 586688  | 0 | 8  | 2 | 0 | 43 | 75  | 19849492 | 5.81E-01 | 1 |
| MAP3K1   | 200595  | 412  | 38  | 3819168 | 1109652 | 0 | 10 | 3 | 0 | 11 | 16  | 6069088  | 5.81E-01 | 1 |
| ACAT2    | 648197  | 420  | 22  | 1012820 | 296548  | 0 | 2  | 0 | 0 | 50 | 70  | 24941360 | 5.81E-01 | 1 |
| CWC22    | 35642   | 927  | 7   | 2408696 | 580636  | 0 | 4  | 1 | 0 | 36 | 37  | 20048140 | 5.81E-01 | 1 |
| WIBG     | 1994705 | 229  | 35  | 546816  | 159132  | 0 | 3  | 1 | 0 | 17 | 35  | 8442184  | 5.81E-01 | 1 |
| STK38L   | 555677  | 345  | 37  | 1251340 | 294056  | 0 | 5  | 0 | 0 | 50 | 62  | 21306956 | 5.82E-01 | 1 |
| HRH4     | 144714  | 390  | 16  | 986120  | 277324  | 0 | 3  | 1 | 0 | 50 | 46  | 17547596 | 5.82E-01 | 1 |
| WISP2    | 890596  | 168  | 46  | 615524  | 201496  | 0 | 2  | 0 | 0 | 50 | 63  | 21028564 | 5.82E-01 | 1 |
| POU2AF1  | 238940  | 567  | 19  | 632612  | 207904  | 0 | 1  | 0 | 0 | 50 | 28  | 20439740 | 5.82E-01 | 1 |
| NLK      | 1261475 | 410  | -3  | 1355292 | 379140  | 0 | 6  | 0 | 0 | 20 | 26  | 8342504  | 5.82E-01 | 1 |
| NOL9     | 636407  | 203  | 41  | 1775728 | 525812  | 0 | 6  | 1 | 0 | 45 | 46  | 19251768 | 5.82E-01 | 1 |
| MAP2K4   | 45834   | 583  | -52 | 1054828 | 271628  | 0 | 4  | 0 | 0 | 11 | 11  | 4650072  | 5.82E-01 | 1 |
| COL4A3BF | 253484  | 500  | 37  | 1958356 | 535424  | 0 | 6  | 2 | 0 | 25 | 26  | 9666824  | 5.82E-01 | 1 |
| PLXNC1   | 218710  | 580  | 31  | 4043448 | 1111788 | 0 | 10 | 4 | 0 | 50 | 49  | 21067012 | 5.82E-01 | 1 |
| SERPINB7 | 159863  | 441  | -11 | 993596  | 257032  | 0 | 2  | 1 | 0 | 18 | 22  | 7562508  | 5.82E-01 | 1 |
| FITM1    | 974559  | 220  | 41  | 700964  | 246352  | 0 | 2  | 1 | 0 | 50 | 62  | 24565780 | 5.82E-01 | 1 |
| ASB17    | 140995  | 603  | -11 | 750092  | 208972  | 0 | 2  | 0 | 0 | 50 | 62  | 22943844 | 5.82E-01 | 1 |
| QTRTD1   | 426794  | 504  | 26  | 1068712 | 298328  | 0 | 4  | 0 | 0 | 16 | 18  | 7312596  | 5.82E-01 | 1 |
| PRKAG2   | 600611  | 437  | 20  | 1476332 | 414028  | 0 | 2  | 1 | 0 | 50 | 69  | 22394892 | 5.82E-01 | 1 |
| CD36     | 120451  | 351  | -28 | 1244576 | 324316  | 0 | 3  | 0 | 0 | 6  | 4   | 2489508  | 5.83E-01 | 1 |
| ZNF784   | 1077402 | 254  | -10 | 780708  | 263796  | 0 | 4  | 0 | 0 | 8  | 8   | 2559640  | 5.83E-01 | 1 |
| GAB3     | 1737597 | NaN  | 10  | 1502320 | 422216  | 0 | 2  | 0 | 0 | 7  | 6   | 4198664  | 5.83E-01 | 1 |
| RRAGC    | 524940  | 458  | 24  | 1040232 | 269136  | 0 | 1  | 1 | 0 | 50 | 45  | 18683236 | 5.83E-01 | 1 |
| GLI2     | 183735  | 374  | 12  | 3898200 | 1239948 | 0 | 13 | 7 | 0 | 14 | 25  | 7691024  | 5.83E-01 | 1 |

|          |         |      |     |         |         |   |    |   |   |    |    |          |          |   |
|----------|---------|------|-----|---------|---------|---|----|---|---|----|----|----------|----------|---|
| UQCRB    | 217849  | 671  | 12  | 305448  | 66216   | 0 | 1  | 0 | 0 | 50 | 75 | 24887960 | 5.83E-01 | 1 |
| CASP3    | 281208  | 471  | 28  | 740124  | 176220  | 0 | 2  | 1 | 0 | 50 | 43 | 17634816 | 5.83E-01 | 1 |
| HTR7     | 98852   | 510  | -4  | 1205772 | 350304  | 0 | 5  | 1 | 0 | 48 | 69 | 22203720 | 5.83E-01 | 1 |
| PTOV1    | 1673246 | 205  | 37  | 1061236 | 321824  | 0 | 3  | 2 | 0 | 13 | 23 | 7061972  | 5.83E-01 | 1 |
| PLA2G5   | 528859  | 466  | 24  | 365968  | 96476   | 0 | 1  | 0 | 0 | 50 | 43 | 18821008 | 5.83E-01 | 1 |
| SNX31    | 1141276 | 196  | 50  | 1181564 | 286936  | 0 | 5  | 1 | 0 | 41 | 56 | 16967316 | 5.83E-01 | 1 |
| PIR      | 193887  | NaN  | 37  | 772164  | 198648  | 0 | 1  | 1 | 0 | 50 | 59 | 18336848 | 5.83E-01 | 1 |
| SCAMP5   | 840042  | 199  | 44  | 620864  | 160912  | 0 | 2  | 0 | 0 | 50 | 60 | 20575376 | 5.83E-01 | 1 |
| PLOD3    | 1022626 | 258  | 39  | 1892852 | 551800  | 0 | 4  | 4 | 0 | 50 | 67 | 19705312 | 5.84E-01 | 1 |
| RSAD2    | 40919   | 1132 | 10  | 938060  | 243148  | 0 | 3  | 0 | 0 | 50 | 63 | 24613128 | 5.84E-01 | 1 |
| R3HDM1   | 561193  | 558  | 20  | 2855120 | 771808  | 0 | 10 | 1 | 0 | 14 | 14 | 5721632  | 5.84E-01 | 1 |
| COQ4     | 1813435 | 201  | 46  | 660380  | 217516  | 0 | 1  | 1 | 0 | 50 | 69 | 20850564 | 5.84E-01 | 1 |
| PRAMEF1  | 141239  | 571  | 18  | 1194024 | 342828  | 0 | 4  | 1 | 0 | 50 | 46 | 17600996 | 5.84E-01 | 1 |
| PNPLA1   | 839966  | 358  | 30  | 1345680 | 420792  | 0 | 5  | 0 | 0 | 50 | 56 | 19422292 | 5.84E-01 | 1 |
| EXOSC7   | 479578  | 326  | 41  | 757568  | 212176  | 0 | 2  | 0 | 0 | 50 | 48 | 19950952 | 5.84E-01 | 1 |
| PAIP2    | 835535  | 177  | 41  | 351728  | 71200   | 0 | 1  | 0 | 0 | 50 | 51 | 18654044 | 5.84E-01 | 1 |
| EIF2AK3  | 118199  | 366  | 9   | 2865444 | 781776  | 0 | 8  | 3 | 0 | 50 | 55 | 22512728 | 5.84E-01 | 1 |
| GNG5     | 238252  | 685  | -2  | 176932  | 52688   | 0 | 1  | 1 | 0 | 4  | 3  | 1008192  | 5.84E-01 | 1 |
| TRPM6    | 95662   | 726  | -16 | 5328608 | 1362412 | 0 | 18 | 5 | 0 | 25 | 46 | 12519452 | 5.84E-01 | 1 |
| VAMP4    | 415434  | 718  | 3   | 397296  | 87576   | 0 | 1  | 0 | 0 | 50 | 55 | 19543332 | 5.84E-01 | 1 |
| NUBP1    | 257980  | 356  | 37  | 851196  | 222144  | 0 | 1  | 0 | 0 | 50 | 52 | 17944536 | 5.84E-01 | 1 |
| SLC25A20 | 1790488 | 140  | 38  | 778572  | 223212  | 0 | 3  | 0 | 0 | 50 | 72 | 22035688 | 5.84E-01 | 1 |
| IMMT     | 872251  | 420  | 42  | 1941624 | 550020  | 0 | 7  | 0 | 0 | 20 | 23 | 7842324  | 5.85E-01 | 1 |
| CDK8     | 96507   | 578  | 22  | 1236744 | 306516  | 0 | 5  | 2 | 0 | 23 | 28 | 9885052  | 5.85E-01 | 1 |
| OR52M1   | 190769  | 879  | -1  | 762552  | 255252  | 0 | 1  | 1 | 0 | 50 | 51 | 19817096 | 5.85E-01 | 1 |
| DYRK4    | 276521  | 874  | 24  | 1365972 | 350304  | 0 | 6  | 2 | 0 | 24 | 36 | 11118592 | 5.85E-01 | 1 |
| TLX1     | 469702  | 221  | 52  | 804916  | 264152  | 0 | 2  | 0 | 0 | 50 | 47 | 19691784 | 5.85E-01 | 1 |
| NME5     | 1044706 | 377  | 41  | 561768  | 142044  | 0 | 3  | 0 | 0 | 50 | 71 | 18121112 | 5.85E-01 | 1 |
| PSG5     | 307971  | 178  | -25 | 850484  | 247420  | 0 | 2  | 1 | 0 | 50 | 84 | 21330452 | 5.85E-01 | 1 |
| SEMA3B   | 843769  | 206  | 51  | 1884308 | 590248  | 0 | 5  | 0 | 0 | 19 | 14 | 5772184  | 5.85E-01 | 1 |
| OR10K1   | 177013  | 929  | 7   | 757212  | 246708  | 0 | 4  | 2 | 0 | 5  | 4  | 1493420  | 5.85E-01 | 1 |
| POU4F1   | 41876   | 1004 | -1  | 1006768 | 343184  | 0 | 4  | 1 | 0 | 50 | 65 | 17985120 | 5.85E-01 | 1 |
| ATP8B1   | 340613  | 247  | 36  | 3274488 | 852264  | 0 | 12 | 3 | 0 | 21 | 16 | 7776464  | 5.85E-01 | 1 |

|           |         |      |     |         |         |   |    |   |   |    |     |          |          |   |
|-----------|---------|------|-----|---------|---------|---|----|---|---|----|-----|----------|----------|---|
| WDR61     | 447425  | 371  | 54  | 811324  | 211820  | 0 | 1  | 0 | 0 | 50 | 56  | 19480320 | 5.85E-01 | 1 |
| C10orf128 | NaN     | NaN  | NaN | 287648  | 77608   | 0 | 1  | 1 | 0 | 8  | 17  | 4003576  | 5.85E-01 | 1 |
| ZNF430    | 156264  | 1079 | -42 | 1487724 | 358848  | 0 | 7  | 1 | 0 | 24 | 39  | 9980460  | 5.85E-01 | 1 |
| INSL3     | 1216364 | 212  | 37  | 319332  | 110004  | 0 | 1  | 0 | 0 | 50 | 49  | 17585332 | 5.85E-01 | 1 |
| LRRC37A3  | 802924  | 241  | 8   | 4071928 | 1213604 | 0 | 14 | 9 | 0 | 47 | 70  | 20437604 | 5.86E-01 | 1 |
| RAB31     | 441061  | 148  | 43  | 522964  | 130652  | 0 | 1  | 0 | 0 | 50 | 42  | 17584264 | 5.86E-01 | 1 |
| ISOC2     | 1048909 | 399  | 24  | 550020  | 182628  | 0 | 2  | 1 | 0 | 50 | 71  | 20869076 | 5.86E-01 | 1 |
| ZNF486    | 375734  | 904  | -57 | 1213960 | 289784  | 0 | 7  | 0 | 0 | 11 | 16  | 4456408  | 5.86E-01 | 1 |
| CDK3      | 1639614 | 194  | 22  | 782844  | 227484  | 0 | 4  | 1 | 0 | 50 | 92  | 24769768 | 5.86E-01 | 1 |
| C4orf32   | 167195  | 334  | 20  | 330368  | 100036  | 0 | 1  | 0 | 0 | 50 | 57  | 20459320 | 5.86E-01 | 1 |
| VPS8      | 1340797 | 626  | 37  | 3818100 | 956928  | 0 | 11 | 0 | 0 | 0  | 0   | 956928   | 5.86E-01 | 1 |
| OR10J3    | 285980  | 737  | -6  | 807052  | 248132  | 0 | 4  | 2 | 0 | 4  | 7   | 1763268  | 5.86E-01 | 1 |
| XRN1      | 502945  | 403  | 29  | 4514792 | 1131724 | 0 | 13 | 2 | 0 | 2  | 7   | 2719840  | 5.86E-01 | 1 |
| RHOXF1    | NaN     | NaN  | NaN | 470632  | 132788  | 0 | 1  | 0 | 0 | 50 | 116 | 39778372 | 5.86E-01 | 1 |
| AIM2      | 97976   | 866  | 8   | 888932  | 234604  | 0 | 3  | 1 | 0 | 50 | 66  | 22415540 | 5.86E-01 | 1 |
| RASEF     | 119712  | 813  | -45 | 1928096 | 514420  | 0 | 5  | 0 | 0 | 8  | 4   | 2686020  | 5.86E-01 | 1 |
| ZP3       | 870785  | 220  | 59  | 1076188 | 319688  | 0 | 2  | 0 | 0 | 11 | 8   | 5429712  | 5.86E-01 | 1 |
| SLTM      | 532170  | 212  | 23  | 2705244 | 698472  | 0 | 9  | 3 | 0 | 30 | 35  | 12037072 | 5.86E-01 | 1 |
| TREML1    | 227466  | 611  | 41  | 770028  | 250980  | 0 | 2  | 0 | 0 | 14 | 16  | 4588484  | 5.87E-01 | 1 |
| CLTA      | 857985  | 257  | 46  | 656820  | 166608  | 0 | 2  | 0 | 0 | 50 | 67  | 23320136 | 5.87E-01 | 1 |
| CXCL5     | 230379  | 408  | 2   | 292276  | 89000   | 0 | 1  | 1 | 0 | 8  | 11  | 4168048  | 5.87E-01 | 1 |
| FAM171A1  | 211657  | 716  | 8   | 2224644 | 662160  | 0 | 11 | 0 | 0 | 0  | 0   | 662160   | 5.87E-01 | 1 |
| H2AFY     | 583238  | 414  | 41  | 1033112 | 297616  | 0 | 4  | 0 | 0 | 50 | 86  | 28633792 | 5.87E-01 | 1 |
| NUDT5     | 328303  | 227  | 34  | 593808  | 149520  | 0 | 1  | 2 | 0 | 14 | 15  | 4453916  | 5.87E-01 | 1 |
| ZNF526    | 790787  | 299  | 37  | 1639736 | 518692  | 0 | 7  | 2 | 0 | 50 | 73  | 25484972 | 5.87E-01 | 1 |
| MICALL2   | 706729  | 345  | 23  | 2260956 | 707016  | 0 | 5  | 0 | 0 | 4  | 3   | 2581356  | 5.87E-01 | 1 |
| TRABD     | 944000  | 242  | 49  | 960132  | 286224  | 0 | 4  | 0 | 0 | 50 | 67  | 23711024 | 5.87E-01 | 1 |
| EXTL3     | 403198  | 327  | 42  | 2275196 | 689572  | 0 | 6  | 1 | 0 | 31 | 26  | 13553988 | 5.87E-01 | 1 |
| OLFM2     | 1143339 | 469  | -13 | 1141336 | 339980  | 0 | 5  | 2 | 0 | 50 | 57  | 17645140 | 5.87E-01 | 1 |
| HOXB8     | 946208  | 524  | 29  | 612676  | 173372  | 0 | 4  | 2 | 0 | 16 | 19  | 4118564  | 5.87E-01 | 1 |
| ADAMTSL   | 1869593 | 315  | 35  | 2448568 | 674264  | 0 | 5  | 4 | 0 | 32 | 36  | 12446472 | 5.87E-01 | 1 |
| XKR9      | 241667  | 562  | 22  | 959776  | 247064  | 0 | 2  | 0 | 0 | 50 | 36  | 19597088 | 5.87E-01 | 1 |
| MIB1      | 246867  | 325  | 47  | 2609124 | 702744  | 0 | 7  | 3 | 0 | 27 | 35  | 11754764 | 5.87E-01 | 1 |

|           |         |      |     |         |         |   |    |   |   |    |     |          |          |   |
|-----------|---------|------|-----|---------|---------|---|----|---|---|----|-----|----------|----------|---|
| PDZD4     | 2103463 | NaN  | 30  | 1915280 | 581704  | 0 | 5  | 1 | 0 | 16 | 21  | 8064112  | 5.87E-01 | 1 |
| OR2A25    | 222080  | 812  | -11 | 760416  | 234960  | 0 | 3  | 1 | 0 | 50 | 70  | 20067720 | 5.87E-01 | 1 |
| TP53TG5   | 1037999 | 382  | 35  | 752940  | 200784  | 0 | 4  | 2 | 0 | 50 | 68  | 17427980 | 5.87E-01 | 1 |
| ZNF230    | 533136  | 558  | -35 | 1244220 | 294768  | 0 | 6  | 1 | 0 | 50 | 58  | 16442928 | 5.87E-01 | 1 |
| ANKAR     | 408508  | 452  | 20  | 3724828 | 971168  | 0 | 14 | 1 | 0 | 6  | 5   | 2836964  | 5.87E-01 | 1 |
| C4orf29   | 231217  | 284  | 16  | 1089716 | 282664  | 0 | 3  | 1 | 0 | 50 | 46  | 19400576 | 5.87E-01 | 1 |
| CRY2      | 429658  | 271  | 34  | 1588116 | 467784  | 0 | 5  | 1 | 0 | 50 | 58  | 18989396 | 5.87E-01 | 1 |
| CCDC60    | 151508  | 727  | 1   | 1448564 | 372376  | 0 | 4  | 1 | 0 | 50 | 50  | 19734148 | 5.88E-01 | 1 |
| TNFRSF1E  | 516231  | 263  | 32  | 1172664 | 348168  | 0 | 5  | 0 | 0 | 50 | 61  | 19795024 | 5.88E-01 | 1 |
| ID7-PLA2C | 874211  | 259  | 40  | 2592036 | 758280  | 0 | 7  | 1 | 0 | 25 | 29  | 15107928 | 5.88E-01 | 1 |
| PAFAH1B2  | 426428  | 228  | 46  | 785692  | 199004  | 0 | 2  | 0 | 0 | 50 | 39  | 17316908 | 5.88E-01 | 1 |
| PCDHB4    | 915569  | 724  | -11 | 1922756 | 627628  | 0 | 10 | 0 | 0 | 0  | 0   | 627628   | 5.88E-01 | 1 |
| DCAF16    | 271201  | 1073 | 21  | 534000  | 161268  | 0 | 1  | 0 | 0 | 50 | 33  | 21067012 | 5.88E-01 | 1 |
| TAS2R3    | 200522  | 844  | 14  | 784980  | 234960  | 0 | 3  | 0 | 0 | 50 | 60  | 17687504 | 5.88E-01 | 1 |
| DBR1      | 190056  | 464  | 9   | 1412964 | 363120  | 0 | 3  | 2 | 0 | 50 | 61  | 22322980 | 5.88E-01 | 1 |
| CD1A      | 120861  | 833  | 3   | 843008  | 229264  | 0 | 4  | 2 | 0 | 37 | 48  | 13642632 | 5.88E-01 | 1 |
| FAM159A   | 663153  | 261  | 19  | 488788  | 135992  | 0 | 1  | 1 | 0 | 33 | 35  | 12992220 | 5.89E-01 | 1 |
| TSSK6     | 868278  | 284  | 7   | 658600  | 219296  | 0 | 3  | 0 | 0 | 50 | 74  | 19156360 | 5.89E-01 | 1 |
| C19orf73  | 2011861 | 267  | 47  | 298328  | 118192  | 0 | 1  | 0 | 0 | 50 | 71  | 20637320 | 5.89E-01 | 1 |
| PGP       | 2179404 | 224  | 39  | 770028  | 268068  | 0 | 2  | 1 | 0 | 50 | 46  | 19527312 | 5.89E-01 | 1 |
| ZNF844    | NaN     | NaN  | NaN | 1721260 | 428624  | 0 | 6  | 2 | 0 | 50 | 118 | 40074208 | 5.89E-01 | 1 |
| GTSF1L    | 395176  | 374  | 38  | 382700  | 96832   | 0 | 1  | 0 | 0 | 50 | 55  | 22722056 | 5.89E-01 | 1 |
| MMP11     | 637355  | 196  | 52  | 1222148 | 376648  | 0 | 2  | 0 | 0 | 24 | 21  | 8565716  | 5.89E-01 | 1 |
| CHCHD7    | 343112  | 552  | 19  | 356356  | 63368   | 0 | 2  | 1 | 0 | 6  | 8   | 1962628  | 5.89E-01 | 1 |
| SOS1      | 805852  | 351  | 18  | 3455692 | 914564  | 0 | 20 | 2 | 0 | 3  | 3   | 1284804  | 5.89E-01 | 1 |
| EPCAM     | 806315  | 246  | 37  | 828768  | 214668  | 0 | 1  | 0 | 0 | 50 | 58  | 20490648 | 5.89E-01 | 1 |
| MUT       | 64105   | 1139 | -14 | 1919552 | 537916  | 0 | 7  | 0 | 0 | 40 | 62  | 23707464 | 5.89E-01 | 1 |
| TINF2     | 915114  | 220  | 38  | 1137064 | 347456  | 0 | 3  | 1 | 0 | 50 | 69  | 21077692 | 5.89E-01 | 1 |
| ADAMTS1   | 1843278 | 263  | 33  | 3595600 | 1099328 | 0 | 7  | 1 | 0 | 18 | 12  | 6692088  | 5.89E-01 | 1 |
| ZBTB9     | 1397665 | 236  | 31  | 1139912 | 383056  | 0 | 3  | 1 | 0 | 50 | 78  | 20353232 | 5.89E-01 | 1 |
| MRPL33    | 1044890 | 146  | 30  | 254540  | 50908   | 0 | 1  | 0 | 0 | 50 | 70  | 19048848 | 5.89E-01 | 1 |
| LCOR      | 989428  | 512  | 43  | 1103244 | 309720  | 0 | 3  | 0 | 0 | 50 | 71  | 27165648 | 5.89E-01 | 1 |
| SNX7      | 42534   | 903  | -21 | 1186904 | 297616  | 0 | 5  | 0 | 0 | 10 | 11  | 4585992  | 5.90E-01 | 1 |



|           |         |      |     |         |         |   |    |   |   |    |     |          |          |   |
|-----------|---------|------|-----|---------|---------|---|----|---|---|----|-----|----------|----------|---|
| SORL1     | 199734  | 650  | 21  | 5798884 | 1500896 | 0 | 13 | 3 | 0 | 15 | 16  | 6162716  | 5.90E-01 | 1 |
| NME3      | 1604603 | 288  | 36  | 428980  | 132788  | 0 | 1  | 0 | 0 | 50 | 49  | 20717064 | 5.90E-01 | 1 |
| BMX       | 188273  | NaN  | 36  | 1810616 | 432184  | 0 | 6  | 3 | 0 | 50 | 64  | 16201560 | 5.90E-01 | 1 |
| MCM5      | 366628  | 224  | 3   | 1891784 | 531508  | 0 | 5  | 0 | 0 | 34 | 37  | 15707076 | 5.90E-01 | 1 |
| CCKAR     | 165749  | 636  | 36  | 1075832 | 315772  | 0 | 2  | 0 | 0 | 29 | 33  | 11418344 | 5.90E-01 | 1 |
| S100A9    | 1140044 | 401  | 32  | 303312  | 73692   | 0 | 1  | 1 | 0 | 15 | 16  | 5467448  | 5.90E-01 | 1 |
| IL27      | 1133167 | 269  | 63  | 601996  | 199004  | 0 | 2  | 1 | 0 | 17 | 21  | 6723060  | 5.90E-01 | 1 |
| C11orf74  | 96246   | 531  | -26 | 598436  | 136348  | 0 | 1  | 0 | 0 | 50 | 102 | 22901836 | 5.90E-01 | 1 |
| ALG10B    | 42332   | 589  | -38 | 1199364 | 327876  | 0 | 4  | 0 | 0 | 32 | 39  | 13919244 | 5.90E-01 | 1 |
| TWF1      | 132402  | 425  | -5  | 1003208 | 266644  | 0 | 3  | 1 | 0 | 50 | 55  | 21812832 | 5.90E-01 | 1 |
| SLC36A4   | 219463  | 580  | -18 | 1308300 | 354576  | 0 | 3  | 1 | 0 | 22 | 33  | 12280932 | 5.90E-01 | 1 |
| OCA2      | 154909  | 1141 | -61 | 2140984 | 645428  | 0 | 12 | 7 | 0 | 18 | 29  | 6864036  | 5.90E-01 | 1 |
| CCDC68    | 89155   | 373  | -5  | 908868  | 214668  | 0 | 2  | 0 | 0 | 50 | 59  | 24312308 | 5.90E-01 | 1 |
| FAM53B    | 300236  | 352  | 32  | 1053404 | 314704  | 0 | 1  | 1 | 0 | 50 | 43  | 19201928 | 5.90E-01 | 1 |
| USP14     | 527535  | 689  | -11 | 1332152 | 317908  | 0 | 4  | 1 | 0 | 50 | 62  | 17535136 | 5.90E-01 | 1 |
| PTPN1     | 621979  | 153  | 51  | 1148812 | 286580  | 0 | 3  | 1 | 0 | 50 | 61  | 17650836 | 5.90E-01 | 1 |
| ITGA7     | 1746452 | 384  | 9   | 3109660 | 928448  | 0 | 7  | 2 | 0 | 22 | 26  | 10692816 | 5.90E-01 | 1 |
| ADAM2     | 12694   | 576  | -2  | 1977580 | 468140  | 0 | 8  | 0 | 0 | 6  | 13  | 3579580  | 5.91E-01 | 1 |
| DBNDD2    | 1037999 | 382  | 35  | 467428  | 132788  | 0 | 2  | 0 | 0 | 50 | 68  | 17427980 | 5.91E-01 | 1 |
| CCL21     | 712216  | 220  | 49  | 349236  | 98256   | 0 | 1  | 0 | 0 | 50 | 47  | 18490640 | 5.91E-01 | 1 |
| ARMCX1    | 329999  | NaN  | 8   | 1121400 | 333216  | 0 | 4  | 0 | 0 | 50 | 59  | 21254980 | 5.91E-01 | 1 |
| ABHD3     | 269726  | 244  | 57  | 1055896 | 291920  | 0 | 4  | 1 | 0 | 50 | 64  | 20293068 | 5.91E-01 | 1 |
| FAM21A    | NaN     | NaN  | NaN | 3504820 | 925244  | 0 | 10 | 2 | 0 | 50 | 118 | 40570828 | 5.91E-01 | 1 |
| HMGA2     | 274514  | 562  | -6  | 350660  | 97900   | 0 | 1  | 0 | 0 | 50 | 55  | 18846996 | 5.91E-01 | 1 |
| PUS7      | 403383  | 192  | 37  | 1745112 | 440016  | 0 | 4  | 0 | 0 | 34 | 39  | 15057376 | 5.91E-01 | 1 |
| SLC22A4   | 531594  | 238  | 44  | 1385196 | 421860  | 0 | 3  | 1 | 0 | 48 | 36  | 18730228 | 5.91E-01 | 1 |
| XAGE3     | 476232  | NaN  | 26  | 300820  | 77252   | 0 | 1  | 0 | 0 | 50 | 80  | 25507400 | 5.91E-01 | 1 |
| EVI5L     | 836245  | 270  | 24  | 2073700 | 592028  | 0 | 6  | 1 | 0 | 26 | 36  | 12639424 | 5.91E-01 | 1 |
| IL1R1     | 232947  | 522  | 20  | 1493776 | 375224  | 0 | 3  | 1 | 0 | 50 | 49  | 21598164 | 5.91E-01 | 1 |
| TM6GALNAC | 1278941 | 201  | 51  | 767180  | 224992  | 0 | 2  | 0 | 0 | 50 | 53  | 22309808 | 5.91E-01 | 1 |
| FAM102A   | 1604109 | 201  | 61  | 985408  | 290852  | 0 | 4  | 1 | 0 | 50 | 69  | 19892212 | 5.91E-01 | 1 |
| RNF186    | 559698  | 259  | 28  | 542544  | 187968  | 0 | 2  | 1 | 0 | 49 | 68  | 20089792 | 5.91E-01 | 1 |
| LYSMD2    | 440341  | 247  | 34  | 532220  | 168388  | 0 | 2  | 0 | 0 | 50 | 66  | 19788616 | 5.92E-01 | 1 |

|          |         |      |     |         |         |   |    |   |   |    |     |          |          |   |
|----------|---------|------|-----|---------|---------|---|----|---|---|----|-----|----------|----------|---|
| KIF21B   | 552427  | 490  | 32  | 4149536 | 1197940 | 0 | 14 | 7 | 0 | 40 | 78  | 20043512 | 5.92E-01 | 1 |
| GGT7     | 1040878 | 205  | 48  | 1651484 | 534712  | 0 | 5  | 2 | 0 | 50 | 64  | 21062384 | 5.92E-01 | 1 |
| DAPP1    | 204991  | 693  | 19  | 742972  | 193664  | 0 | 2  | 1 | 0 | 16 | 13  | 4120700  | 5.92E-01 | 1 |
| CHPF2    | 610106  | 290  | 32  | 1848352 | 641156  | 0 | 5  | 1 | 0 | 50 | 52  | 23170260 | 5.92E-01 | 1 |
| DDHD2    | 734603  | 277  | 44  | 1923824 | 494128  | 0 | 7  | 1 | 0 | 22 | 25  | 7515516  | 5.92E-01 | 1 |
| PPP1R10  | 2080582 | 271  | 32  | 2369180 | 722680  | 0 | 9  | 2 | 0 | 24 | 27  | 11479576 | 5.92E-01 | 1 |
| OR51A7   | 65798   | 1006 | -15 | 774300  | 226416  | 0 | 3  | 0 | 0 | 50 | 67  | 21104748 | 5.92E-01 | 1 |
| POLR3G   | 84917   | 780  | 16  | 621220  | 126380  | 0 | 1  | 0 | 0 | 50 | 44  | 20122188 | 5.92E-01 | 1 |
| TANK     | 207004  | 370  | 26  | 1126384 | 301532  | 0 | 3  | 1 | 0 | 50 | 55  | 22457192 | 5.92E-01 | 1 |
| G3BP1    | 584468  | 406  | 46  | 1212180 | 335352  | 0 | 2  | 1 | 0 | 50 | 66  | 24436196 | 5.92E-01 | 1 |
| PFKFB3   | 560233  | 399  | 38  | 1379500 | 368816  | 0 | 5  | 4 | 0 | 10 | 15  | 3481680  | 5.92E-01 | 1 |
| OR7A5    | 963401  | 546  | 14  | 783556  | 241724  | 0 | 4  | 1 | 0 | 47 | 68  | 17530508 | 5.93E-01 | 1 |
| UFSP2    | 173409  | 422  | 20  | 1228556 | 324316  | 0 | 4  | 1 | 0 | 50 | 51  | 19200504 | 5.93E-01 | 1 |
| SLC2A12  | 102277  | 359  | 16  | 1528664 | 468496  | 0 | 3  | 2 | 0 | 50 | 52  | 19521616 | 5.93E-01 | 1 |
| GH1      | 1446139 | 380  | 27  | 578856  | 138840  | 0 | 2  | 1 | 0 | 50 | 63  | 18745892 | 5.93E-01 | 1 |
| H1F0     | 1385064 | 203  | 66  | 479888  | 144892  | 0 | 1  | 0 | 0 | 50 | 52  | 18523392 | 5.93E-01 | 1 |
| ZNF441   | 904926  | 521  | -1  | 1810616 | 425776  | 0 | 9  | 1 | 0 | 22 | 30  | 7232496  | 5.93E-01 | 1 |
| PIGB     | 243817  | 487  | 11  | 1456040 | 371308  | 0 | 5  | 1 | 0 | 50 | 53  | 19444008 | 5.93E-01 | 1 |
| DCAF7    | 934619  | 247  | -1  | 880032  | 245640  | 0 | 3  | 1 | 0 | 50 | 54  | 17706016 | 5.93E-01 | 1 |
| GRHL2    | 424003  | 399  | 36  | 1664300 | 405484  | 0 | 5  | 2 | 0 | 50 | 64  | 21336504 | 5.93E-01 | 1 |
| IL17RD   | 426285  | 332  | 37  | 1899616 | 524744  | 0 | 4  | 1 | 0 | 50 | 42  | 19333648 | 5.93E-01 | 1 |
| HTR5A    | 186338  | 603  | -1  | 874692  | 278748  | 0 | 3  | 2 | 0 | 10 | 8   | 3230344  | 5.94E-01 | 1 |
| SLC25A41 | 865106  | 219  | 33  | 926668  | 289784  | 0 | 4  | 1 | 0 | 50 | 76  | 20954160 | 5.94E-01 | 1 |
| NMT1     | 831501  | 191  | 28  | 1301536 | 339980  | 0 | 4  | 1 | 0 | 50 | 88  | 23819960 | 5.94E-01 | 1 |
| PSG4     | 310387  | 125  | -33 | 1065864 | 303312  | 0 | 6  | 2 | 0 | 39 | 78  | 15097248 | 5.94E-01 | 1 |
| TMEM38B  | 214951  | 773  | -8  | 751160  | 205768  | 0 | 2  | 1 | 0 | 25 | 26  | 11426532 | 5.94E-01 | 1 |
| SDR9C7   | 2103486 | 286  | 26  | 783912  | 234960  | 0 | 3  | 0 | 0 | 28 | 47  | 16026408 | 5.94E-01 | 1 |
| SGK3     | 391086  | 405  | 25  | 1327880 | 328588  | 0 | 4  | 2 | 0 | 9  | 12  | 4307244  | 5.94E-01 | 1 |
| BHLHE22  | 9265    | 1050 | -1  | 900324  | 323604  | 0 | 3  | 1 | 0 | 50 | 58  | 20627352 | 5.94E-01 | 1 |
| SEMA3E   | 74057   | 955  | -30 | 2034540 | 520116  | 0 | 12 | 2 | 0 | 50 | 100 | 23101196 | 5.94E-01 | 1 |
| ZNF676   | 58109   | 1305 | -63 | 1537208 | 358492  | 0 | 8  | 2 | 0 | 44 | 98  | 21167760 | 5.94E-01 | 1 |
| NAA38    | 72287   | 922  | -13 | 254540  | 69064   | 0 | 1  | 1 | 0 | 12 | 16  | 4728036  | 5.94E-01 | 1 |
| BCL2L13  | 413666  | 221  | -23 | 1214672 | 368104  | 0 | 5  | 3 | 0 | 38 | 66  | 16349300 | 5.94E-01 | 1 |

|          |         |      |     |         |         |   |    |   |   |    |    |          |          |   |
|----------|---------|------|-----|---------|---------|---|----|---|---|----|----|----------|----------|---|
| KRR1     | 513610  | 524  | -10 | 1017448 | 247064  | 0 | 2  | 1 | 0 | 50 | 68 | 22647652 | 5.94E-01 | 1 |
| ACTR2    | 606183  | 343  | 31  | 1039520 | 280528  | 0 | 2  | 0 | 0 | 32 | 31 | 16950940 | 5.94E-01 | 1 |
| PEA15    | 841605  | 386  | 29  | 343540  | 89000   | 0 | 1  | 0 | 0 | 50 | 48 | 19038524 | 5.94E-01 | 1 |
| CPO      | 169586  | 723  | 2   | 982560  | 257388  | 0 | 3  | 0 | 0 | 50 | 63 | 23766204 | 5.94E-01 | 1 |
| MEM184I  | 1631137 | 184  | 67  | 1047352 | 294056  | 0 | 1  | 0 | 0 | 15 | 28 | 11661492 | 5.95E-01 | 1 |
| AKAP1    | 413131  | 258  | -6  | 2259532 | 679604  | 0 | 6  | 2 | 0 | 50 | 65 | 24306968 | 5.95E-01 | 1 |
| C1S      | 2495896 | 211  | 52  | 1781780 | 472768  | 0 | 6  | 1 | 0 | 27 | 33 | 9879000  | 5.95E-01 | 1 |
| RNF39    | 1820240 | 496  | 30  | 1016024 | 349948  | 0 | 4  | 1 | 0 | 50 | 54 | 18891140 | 5.95E-01 | 1 |
| GBP7     | 340715  | 745  | 0   | 1661452 | 428624  | 0 | 5  | 0 | 0 | 50 | 62 | 26016124 | 5.95E-01 | 1 |
| OR1D2    | 457580  | 465  | 8   | 765400  | 236384  | 0 | 2  | 0 | 0 | 50 | 57 | 20535504 | 5.95E-01 | 1 |
| ATG5     | 181529  | 390  | 32  | 740836  | 173372  | 0 | 3  | 1 | 0 | 27 | 40 | 11859072 | 5.95E-01 | 1 |
| SPA17    | 172228  | 604  | 18  | 407976  | 96120   | 0 | 2  | 1 | 0 | 14 | 17 | 4070148  | 5.95E-01 | 1 |
| ZNF189   | 112947  | 898  | -22 | 1634040 | 383412  | 0 | 5  | 1 | 0 | 12 | 13 | 4649716  | 5.95E-01 | 1 |
| TSGA10IP | 3854361 | 208  | 57  | 1395876 | 422928  | 0 | 5  | 1 | 0 | 29 | 35 | 13479584 | 5.95E-01 | 1 |
| QSOX1    | 440831  | 254  | 9   | 1875764 | 581704  | 0 | 5  | 2 | 0 | 26 | 44 | 13168796 | 5.95E-01 | 1 |
| CSPG4    | 578030  | 231  | 39  | 5560364 | 1923112 | 0 | 17 | 2 | 0 | 2  | 3  | 2376656  | 5.96E-01 | 1 |
| FAM118A  | 461688  | 277  | 26  | 932364  | 248844  | 0 | 2  | 2 | 0 | 50 | 71 | 20236464 | 5.96E-01 | 1 |
| MAGOHB   | 407094  | 432  | 4   | 401924  | 94696   | 0 | 1  | 0 | 0 | 50 | 44 | 18906092 | 5.96E-01 | 1 |
| SUPT4H1  | 782135  | 399  | 22  | 315416  | 81880   | 0 | 1  | 0 | 0 | 50 | 85 | 29222972 | 5.96E-01 | 1 |
| TMEM165  | 235221  | 348  | 8   | 808476  | 254184  | 0 | 1  | 0 | 0 | 50 | 59 | 18369244 | 5.96E-01 | 1 |
| ADAMTS1  | 546305  | 566  | 37  | 3115000 | 906020  | 0 | 8  | 1 | 0 | 3  | 2  | 2082244  | 5.96E-01 | 1 |
| ICAM2    | 1455216 | 404  | 25  | 693488  | 207904  | 0 | 1  | 0 | 0 | 50 | 68 | 18709936 | 5.96E-01 | 1 |
| USP20    | 552898  | 184  | 42  | 2380928 | 653260  | 0 | 5  | 3 | 0 | 50 | 52 | 18059880 | 5.96E-01 | 1 |
| PDX1     | 321222  | 612  | 38  | 687080  | 227128  | 0 | 2  | 0 | 0 | 50 | 43 | 16590312 | 5.96E-01 | 1 |
| VPS39    | 625465  | 394  | 35  | 2307948 | 601284  | 0 | 5  | 1 | 0 | 8  | 4  | 2355652  | 5.97E-01 | 1 |
| PLLP     | 701043  | 125  | 43  | 454968  | 144180  | 0 | 1  | 1 | 0 | 32 | 29 | 12193356 | 5.97E-01 | 1 |
| DKK2     | 48475   | 1014 | -18 | 663584  | 182272  | 0 | 3  | 2 | 0 | 8  | 10 | 3191896  | 5.97E-01 | 1 |
| NNMT     | 162422  | 499  | -4  | 668568  | 191172  | 0 | 3  | 0 | 0 | 13 | 14 | 5164848  | 5.97E-01 | 1 |
| CACNA1B  | 286606  | 675  | 29  | 5937368 | 1752232 | 0 | 16 | 5 | 0 | 41 | 37 | 17443288 | 5.97E-01 | 1 |
| PITPNM2  | 1122735 | 196  | 44  | 3417600 | 1010328 | 0 | 8  | 3 | 0 | 17 | 25 | 8803168  | 5.97E-01 | 1 |
| MFAP3    | 174087  | 592  | 16  | 909936  | 257388  | 0 | 4  | 0 | 0 | 50 | 47 | 15545096 | 5.97E-01 | 1 |
| FRMD6    | 238905  | 442  | 22  | 1613036 | 408688  | 0 | 5  | 0 | 0 | 24 | 35 | 11575696 | 5.97E-01 | 1 |
| LCMT2    | 823006  | 415  | 50  | 1663588 | 537560  | 0 | 7  | 3 | 0 | 50 | 74 | 24588920 | 5.97E-01 | 1 |

|          |         |     |     |          |          |   |     |    |   |    |    |          |          |   |
|----------|---------|-----|-----|----------|----------|---|-----|----|---|----|----|----------|----------|---|
| CCL14    | 779228  | 525 | 19  | 295480   | 71912    | 0 | 1   | 0  | 0 | 50 | 69 | 21358220 | 5.97E-01 | 1 |
| ZNF510   | 327128  | 491 | 14  | 1792104  | 416520   | 0 | 6   | 2  | 0 | 50 | 51 | 18992956 | 5.97E-01 | 1 |
| ARL9     | 662749  | 594 | 27  | 320044   | 87932    | 0 | 1   | 0  | 0 | 50 | 64 | 23234340 | 5.97E-01 | 1 |
| PREX2    | 14825   | 990 | 1   | 4447864  | 1114280  | 0 | 22  | 5  | 0 | 3  | 7  | 1963340  | 5.97E-01 | 1 |
| GORAB    | 72379   | 883 | -2  | 1016024  | 270916   | 0 | 3   | 0  | 0 | 50 | 58 | 21687164 | 5.97E-01 | 1 |
| KCNJ2    | 31424   | 614 | -44 | 1073696  | 297616   | 0 | 7   | 1  | 0 | 6  | 13 | 2516920  | 5.97E-01 | 1 |
| SIRPB2   | 397239  | 386 | 42  | 861520   | 254540   | 0 | 2   | 0  | 0 | 50 | 49 | 22689304 | 5.97E-01 | 1 |
| MDM4     | 420144  | 185 | 39  | 1289432  | 326452   | 0 | 2   | 1  | 0 | 50 | 51 | 19267432 | 5.97E-01 | 1 |
| HNF1B    | 553994  | 403 | 28  | 1426136  | 395872   | 0 | 3   | 1  | 0 | 50 | 51 | 18666860 | 5.98E-01 | 1 |
| GPX7     | 647361  | 355 | 12  | 473836   | 139196   | 0 | 1   | 0  | 0 | 50 | 62 | 25476784 | 5.98E-01 | 1 |
| TNK2     | 934412  | 285 | 48  | 2750812  | 892136   | 0 | 6   | 3  | 0 | 50 | 71 | 24124340 | 5.98E-01 | 1 |
| C1orf194 | 989913  | 215 | 18  | 415808   | 109648   | 0 | 1   | 0  | 0 | 50 | 45 | 17234672 | 5.98E-01 | 1 |
| ZNF581   | 1077402 | 254 | -10 | 485228   | 153436   | 0 | 2   | 0  | 0 | 50 | 67 | 17041008 | 5.98E-01 | 1 |
| TRAF2    | 1950713 | 176 | 39  | 1292280  | 358848   | 0 | 5   | 2  | 0 | 50 | 66 | 22923196 | 5.98E-01 | 1 |
| C1orf111 | 363646  | 391 | 1   | 668924   | 181204   | 0 | 2   | 1  | 0 | 50 | 54 | 19589612 | 5.98E-01 | 1 |
| OR8B3    | 149616  | 857 | 0   | 779284   | 224636   | 0 | 2   | 0  | 0 | 50 | 56 | 23031420 | 5.98E-01 | 1 |
| CELA1    | 504747  | 239 | 33  | 669280   | 192596   | 0 | 2   | 0  | 0 | 50 | 57 | 19104384 | 5.98E-01 | 1 |
| MUC16    | 551668  | 537 | -61 | 34960980 | 11879364 | 0 | 166 | 43 | 0 | 2  | 43 | 12280576 | 5.98E-01 | 1 |
| TRMT1    | 1948449 | 221 | 41  | 1679252  | 505876   | 0 | 7   | 2  | 0 | 50 | 60 | 21446864 | 5.98E-01 | 1 |
| SUSD3    | 504920  | 448 | 61  | 641156   | 198292   | 0 | 2   | 0  | 0 | 16 | 18 | 6280196  | 5.99E-01 | 1 |
| TMEM117  | 140202  | 874 | -1  | 1345324  | 334640   | 0 | 4   | 1  | 0 | 24 | 20 | 8845176  | 5.99E-01 | 1 |
| PKIA     | 46989   | 984 | -2  | 201496   | 53756    | 0 | 1   | 0  | 0 | 50 | 86 | 17958420 | 5.99E-01 | 1 |
| KLHL18   | 872055  | 242 | 49  | 1463872  | 416876   | 0 | 5   | 1  | 0 | 50 | 62 | 26356816 | 5.99E-01 | 1 |
| TUBA3D   | 455705  | 540 | 29  | 1130656  | 333572   | 0 | 4   | 1  | 0 | 46 | 48 | 16849480 | 5.99E-01 | 1 |
| QDPR     | 271816  | 901 | 31  | 627628   | 182984   | 0 | 2   | 0  | 0 | 50 | 57 | 19505952 | 5.99E-01 | 1 |
| ACE2     | 179295  | NaN | 32  | 2132084  | 524032   | 0 | 3   | 3  | 0 | 42 | 50 | 19673628 | 5.99E-01 | 1 |
| FAM21C   | 105248  | 558 | 33  | 3447504  | 908868   | 0 | 10  | 1  | 0 | 27 | 17 | 9527272  | 5.99E-01 | 1 |
| COG3     | 763957  | 379 | 50  | 2183704  | 568532   | 0 | 7   | 4  | 0 | 29 | 40 | 12884352 | 5.99E-01 | 1 |
| MPV17L2  | 1178047 | 210 | 43  | 518692   | 163760   | 0 | 2   | 0  | 0 | 50 | 86 | 22294856 | 5.99E-01 | 1 |
| USP43    | 78043   | 204 | -50 | 2792820  | 868284   | 0 | 7   | 1  | 0 | 9  | 10 | 4351744  | 5.99E-01 | 1 |
| C15orf39 | 840096  | 203 | 46  | 2482032  | 884304   | 0 | 14  | 1  | 0 | 0  | 1  | 884304   | 5.99E-01 | 1 |
| SLC15A2  | 516880  | 677 | 28  | 1910296  | 518336   | 0 | 5   | 1  | 0 | 4  | 1  | 1959424  | 5.99E-01 | 1 |
| SDR39U1  | 898202  | 411 | 17  | 724816   | 240656   | 0 | 1   | 0  | 0 | 40 | 55 | 15489560 | 5.99E-01 | 1 |

|         |         |      |     |         |        |   |   |   |   |    |    |          |          |   |
|---------|---------|------|-----|---------|--------|---|---|---|---|----|----|----------|----------|---|
| WNT2    | 331093  | 392  | 5   | 926668  | 247064 | 0 | 3 | 1 | 0 | 50 | 58 | 21373172 | 5.99E-01 | 1 |
| DPP3    | 1941577 | 194  | 51  | 1882884 | 557496 | 0 | 6 | 0 | 0 | 7  | 6  | 3210052  | 5.99E-01 | 1 |
| ATP8A1  | 189404  | 856  | 28  | 3149888 | 819868 | 0 | 9 | 2 | 0 | 50 | 67 | 22739144 | 5.99E-01 | 1 |
| SCUBE2  | 623689  | 357  | 31  | 2686732 | 706304 | 0 | 8 | 2 | 0 | 21 | 24 | 10563944 | 6.00E-01 | 1 |
| IMMP1L  | 124843  | 916  | -4  | 442508  | 116056 | 0 | 1 | 0 | 0 | 50 | 52 | 18245712 | 6.00E-01 | 1 |
| TMEM211 | 363566  | 415  | -21 | 327164  | 100036 | 0 | 1 | 0 | 0 | 50 | 61 | 20841664 | 6.00E-01 | 1 |
| WDR18   | 2292363 | 206  | 44  | 1092208 | 335708 | 0 | 2 | 0 | 0 | 24 | 28 | 9676436  | 6.00E-01 | 1 |
| PRR5    | 320559  | 447  | 36  | 969032  | 307228 | 0 | 6 | 3 | 0 | 9  | 12 | 2882176  | 6.00E-01 | 1 |
| HMOX1   | 364892  | 241  | 2   | 727664  | 217516 | 0 | 2 | 0 | 0 | 50 | 59 | 22984428 | 6.00E-01 | 1 |
| GNB1L   | 690032  | 204  | 10  | 817376  | 259168 | 0 | 3 | 2 | 0 | 50 | 74 | 22993328 | 6.00E-01 | 1 |
| HSPA14  | 255871  | 306  | 35  | 1319336 | 370240 | 0 | 5 | 0 | 0 | 50 | 52 | 19352872 | 6.00E-01 | 1 |
| ETS1    | 215125  | 644  | 28  | 1344612 | 340692 | 0 | 5 | 0 | 0 | 12 | 14 | 5407996  | 6.00E-01 | 1 |
| KLK6    | 581408  | 606  | 29  | 632968  | 173372 | 0 | 2 | 0 | 0 | 50 | 56 | 18321184 | 6.00E-01 | 1 |
| NCKAP1  | 350474  | 419  | 10  | 3011048 | 757924 | 0 | 9 | 2 | 0 | 50 | 73 | 24138936 | 6.00E-01 | 1 |
| SRD5A3  | 235221  | 348  | 8   | 808120  | 233180 | 0 | 3 | 1 | 0 | 50 | 59 | 18369244 | 6.00E-01 | 1 |
| RTAP21- | 30244   | 1055 | -70 | 196512  | 57672  | 0 | 1 | 0 | 0 | 50 | 78 | 14431172 | 6.00E-01 | 1 |
| MARCKS  | 217954  | 608  | 16  | 803136  | 268068 | 0 | 2 | 0 | 0 | 50 | 53 | 22511304 | 6.00E-01 | 1 |
| GIMAP6  | 682986  | 689  | 20  | 728732  | 216448 | 0 | 3 | 2 | 0 | 6  | 8  | 2107876  | 6.00E-01 | 1 |
| GIPC3   | 2160126 | 269  | 39  | 787828  | 238520 | 0 | 3 | 1 | 0 | 50 | 60 | 21798948 | 6.00E-01 | 1 |
| PCBP4   | 1029408 | 224  | 38  | 1012820 | 332860 | 0 | 3 | 1 | 0 | 50 | 44 | 16191592 | 6.00E-01 | 1 |
| KLHL7   | 792869  | 218  | 25  | 1582064 | 406552 | 0 | 4 | 1 | 0 | 39 | 53 | 17584264 | 6.01E-01 | 1 |
| BACE2   | 197460  | 530  | -6  | 1306520 | 390532 | 0 | 4 | 1 | 0 | 40 | 42 | 17438660 | 6.01E-01 | 1 |
| CD164L2 | 847257  | 188  | 26  | 449984  | 126736 | 0 | 1 | 0 | 0 | 50 | 53 | 18526596 | 6.01E-01 | 1 |
| GTPBP8  | 279709  | 639  | 18  | 728376  | 208260 | 0 | 4 | 2 | 0 | 5  | 11 | 2891432  | 6.01E-01 | 1 |
| FAM71B  | 166999  | 1198 | 18  | 1499828 | 448204 | 0 | 4 | 1 | 0 | 50 | 43 | 19254260 | 6.01E-01 | 1 |
| RTAP27- | 4608    | 1035 | -69 | 528304  | 142400 | 0 | 3 | 1 | 0 | 50 | 77 | 14168444 | 6.01E-01 | 1 |
| ALPL    | 547986  | 297  | 42  | 1356360 | 368460 | 0 | 4 | 1 | 0 | 14 | 10 | 5523696  | 6.01E-01 | 1 |
| UBE2D3  | 380953  | 471  | 41  | 478464  | 115344 | 0 | 2 | 1 | 0 | 10 | 18 | 5255984  | 6.01E-01 | 1 |
| GBX2    | 134179  | 453  | 6   | 852976  | 271628 | 0 | 3 | 2 | 0 | 4  | 4  | 1457820  | 6.01E-01 | 1 |
| NKX2-5  | 483508  | 458  | 33  | 885016  | 300464 | 0 | 3 | 1 | 0 | 50 | 51 | 20532300 | 6.02E-01 | 1 |
| A1BG    | 1621097 | 406  | -25 | 1223928 | 397296 | 0 | 3 | 2 | 0 | 50 | 63 | 19879752 | 6.02E-01 | 1 |
| KDM1B   | 477756  | 397  | 1   | 1550024 | 411892 | 0 | 4 | 3 | 0 | 13 | 12 | 4986136  | 6.02E-01 | 1 |
| MED17   | 307453  | 532  | 10  | 1691000 | 445000 | 0 | 6 | 0 | 0 | 3  | 5  | 3072280  | 6.02E-01 | 1 |

|           |         |     |     |         |         |   |    |   |   |    |     |          |          |   |
|-----------|---------|-----|-----|---------|---------|---|----|---|---|----|-----|----------|----------|---|
| PAICS     | 662749  | 594 | 27  | 1135284 | 294768  | 0 | 2  | 0 | 0 | 50 | 64  | 23234340 | 6.02E-01 | 1 |
| RAB26     | 1938163 | 224 | 40  | 658600  | 199004  | 0 | 2  | 1 | 0 | 50 | 61  | 21257472 | 6.02E-01 | 1 |
| NCOA4     | 406207  | 579 | 41  | 1712360 | 428980  | 0 | 5  | 0 | 0 | 50 | 76  | 22964848 | 6.02E-01 | 1 |
| SERPINB10 | 133459  | 522 | 19  | 1042724 | 255964  | 0 | 1  | 1 | 0 | 50 | 50  | 20467152 | 6.02E-01 | 1 |
| CABLES2   | 1190359 | 252 | 33  | 1191176 | 384124  | 0 | 3  | 0 | 0 | 15 | 16  | 5673928  | 6.02E-01 | 1 |
| ZCCHC7    | 517331  | 433 | 32  | 1435036 | 342116  | 0 | 5  | 0 | 0 | 18 | 16  | 7076924  | 6.02E-01 | 1 |
| PLEKHH2   | 503591  | 421 | 29  | 3888944 | 1021720 | 0 | 14 | 2 | 0 | 1  | 4   | 2153444  | 6.02E-01 | 1 |
| CD84      | 1164343 | 634 | 35  | 910292  | 230332  | 0 | 2  | 0 | 0 | 50 | 83  | 21889016 | 6.02E-01 | 1 |
| VSTM2A    | 255140  | 678 | -34 | 608760  | 167676  | 0 | 3  | 1 | 0 | 50 | 100 | 25193764 | 6.02E-01 | 1 |
| TOP1      | 383646  | 129 | 14  | 2077972 | 461732  | 0 | 5  | 0 | 0 | 23 | 14  | 8993984  | 6.02E-01 | 1 |
| WFDC12    | 865186  | 324 | 46  | 292276  | 77252   | 0 | 1  | 0 | 0 | 50 | 92  | 27552620 | 6.02E-01 | 1 |
| MRPS9     | 168425  | 599 | -3  | 1049488 | 267356  | 0 | 1  | 0 | 0 | 50 | 51  | 20449352 | 6.02E-01 | 1 |
| DLAT      | 403342  | 179 | 27  | 1628344 | 503384  | 0 | 4  | 0 | 0 | 10 | 16  | 8530828  | 6.02E-01 | 1 |
| PRAMEF10  | 118495  | 792 | 12  | 1196872 | 339980  | 0 | 3  | 1 | 0 | 50 | 47  | 18244288 | 6.02E-01 | 1 |
| ATP13A4   | 144678  | 776 | -2  | 3116068 | 843008  | 0 | 8  | 0 | 0 | 1  | 0   | 1179428  | 6.03E-01 | 1 |
| TACR2     | 704483  | 285 | 50  | 996800  | 298684  | 0 | 2  | 0 | 0 | 50 | 54  | 17315484 | 6.03E-01 | 1 |
| C1orf43   | 2028928 | 185 | 35  | 659312  | 184408  | 0 | 3  | 0 | 0 | 50 | 68  | 16958060 | 6.03E-01 | 1 |
| CCDC50    | 100733  | 768 | 12  | 1284092 | 310432  | 0 | 4  | 2 | 0 | 50 | 55  | 21296632 | 6.03E-01 | 1 |
| KCNIP2    | 865397  | 335 | 45  | 888932  | 234604  | 0 | 4  | 0 | 0 | 50 | 84  | 26858420 | 6.03E-01 | 1 |
| ELOVL6    | 204465  | 522 | 23  | 696336  | 173016  | 0 | 2  | 0 | 0 | 50 | 51  | 19768324 | 6.03E-01 | 1 |
| ACOT2     | 606300  | 169 | 39  | 1172664 | 386616  | 0 | 3  | 0 | 0 | 50 | 45  | 20608840 | 6.03E-01 | 1 |
| GLRA1     | 496476  | 528 | 28  | 1185480 | 316128  | 0 | 5  | 1 | 0 | 14 | 17  | 5190836  | 6.03E-01 | 1 |
| JUNB      | 1937827 | 226 | 32  | 823072  | 291920  | 0 | 3  | 0 | 0 | 47 | 69  | 20609908 | 6.03E-01 | 1 |
| H2AFV     | 1200579 | 164 | 55  | 350660  | 103240  | 0 | 2  | 1 | 0 | 5  | 14  | 2994672  | 6.03E-01 | 1 |
| C2orf49   | 198223  | 381 | 8   | 598080  | 163404  | 0 | 2  | 0 | 0 | 50 | 54  | 18850912 | 6.03E-01 | 1 |
| FABP2     | 218603  | 824 | -1  | 354220  | 86864   | 0 | 1  | 0 | 0 | 50 | 51  | 19615600 | 6.03E-01 | 1 |
| PRAM1     | 726124  | 214 | 1   | 1670352 | 516912  | 0 | 7  | 1 | 0 | 50 | 67  | 22455056 | 6.03E-01 | 1 |
| CAPS2     | 110847  | 692 | -32 | 1501964 | 358492  | 0 | 4  | 0 | 0 | 5  | 4   | 2236392  | 6.03E-01 | 1 |
| RPLP2     | 1799017 | 232 | 51  | 304736  | 85084   | 0 | 1  | 0 | 0 | 50 | 57  | 18763692 | 6.03E-01 | 1 |
| SLC20A1   | 613047  | 214 | 57  | 1716632 | 500536  | 0 | 8  | 2 | 0 | 50 | 71  | 21130736 | 6.04E-01 | 1 |
| FCAR      | 914047  | 573 | -19 | 819512  | 194020  | 0 | 3  | 2 | 0 | 19 | 46  | 8972980  | 6.04E-01 | 1 |
| SPINT4    | 777303  | 359 | 16  | 270560  | 62656   | 0 | 1  | 0 | 0 | 50 | 71  | 19735928 | 6.04E-01 | 1 |
| TMEM60    | 253754  | 795 | 28  | 337132  | 96476   | 0 | 1  | 0 | 0 | 50 | 57  | 20418736 | 6.04E-01 | 1 |

|          |         |      |     |         |         |   |    |   |   |    |    |          |          |   |
|----------|---------|------|-----|---------|---------|---|----|---|---|----|----|----------|----------|---|
| LILRA6   | 717623  | 458  | -6  | 1210044 | 364188  | 0 | 3  | 1 | 0 | 50 | 58 | 18028196 | 6.04E-01 | 1 |
| ITM2A    | 13949   | NaN  | 29  | 679248  | 187968  | 0 | 2  | 0 | 0 | 50 | 72 | 25915020 | 6.04E-01 | 1 |
| MLN      | 1565139 | 428  | 28  | 308296  | 80456   | 0 | 1  | 0 | 0 | 50 | 71 | 18646212 | 6.04E-01 | 1 |
| GRAP2    | 842645  | 411  | 34  | 859740  | 230688  | 0 | 3  | 0 | 0 | 50 | 54 | 22048504 | 6.04E-01 | 1 |
| UBA52    | 1394856 | 259  | 48  | 340336  | 90068   | 0 | 5  | 2 | 0 | 1  | 2  | 217160   | 6.04E-01 | 1 |
| SYBU     | 133930  | 623  | 11  | 1682456 | 488788  | 0 | 11 | 0 | 0 | 1  | 0  | 563904   | 6.04E-01 | 1 |
| NDUFAF2  | 205876  | 502  | 11  | 453544  | 106088  | 0 | 1  | 0 | 0 | 50 | 53 | 24898640 | 6.04E-01 | 1 |
| GHRL     | 742508  | 333  | 57  | 374156  | 102172  | 0 | 1  | 0 | 0 | 50 | 38 | 14951288 | 6.05E-01 | 1 |
| C10orf12 | 1008851 | 512  | 25  | 3126748 | 871844  | 0 | 10 | 0 | 0 | 4  | 4  | 2579932  | 6.05E-01 | 1 |
| ATOH1    | 58522   | 802  | 24  | 859740  | 277680  | 0 | 2  | 0 | 0 | 50 | 43 | 18780424 | 6.05E-01 | 1 |
| BLOC1S1  | 1814311 | 384  | 26  | 333216  | 87576   | 0 | 1  | 0 | 0 | 50 | 44 | 15945952 | 6.05E-01 | 1 |
| NFX1     | 909394  | 141  | 38  | 3053768 | 762196  | 0 | 8  | 1 | 0 | 12 | 11 | 5265240  | 6.05E-01 | 1 |
| ANAPC5   | 959300  | 258  | 39  | 1965832 | 524744  | 0 | 11 | 0 | 0 | 0  | 0  | 524744   | 6.05E-01 | 1 |
| CLPP     | 943949  | 407  | 31  | 700964  | 211108  | 0 | 2  | 1 | 0 | 50 | 47 | 18083732 | 6.05E-01 | 1 |
| DBP      | 1597109 | 242  | 31  | 774656  | 282664  | 0 | 2  | 0 | 0 | 42 | 46 | 18285940 | 6.05E-01 | 1 |
| TMEM51   | 379959  | 432  | 16  | 627628  | 190460  | 0 | 2  | 1 | 0 | 50 | 59 | 20325820 | 6.05E-01 | 1 |
| IRF6     | 220312  | 429  | 18  | 1209688 | 319688  | 0 | 3  | 3 | 0 | 17 | 17 | 5893224  | 6.05E-01 | 1 |
| RAB40B   | 855855  | 243  | 21  | 700252  | 215024  | 0 | 2  | 0 | 0 | 50 | 47 | 17866928 | 6.05E-01 | 1 |
| OR2C1    | 1361831 | 303  | 29  | 761128  | 245996  | 0 | 3  | 1 | 0 | 50 | 74 | 21539424 | 6.05E-01 | 1 |
| ZWINT    | 65824   | 1191 | -19 | 731936  | 195088  | 0 | 3  | 2 | 0 | 5  | 8  | 2099332  | 6.05E-01 | 1 |
| OR1B1    | 407749  | 646  | 9   | 765756  | 255252  | 0 | 1  | 0 | 0 | 50 | 67 | 20364980 | 6.06E-01 | 1 |
| DCC      | 2849    | 995  | -34 | 3693144 | 1065864 | 0 | 26 | 7 | 0 | 8  | 33 | 6589560  | 6.06E-01 | 1 |
| CAPRIN1  | 770116  | 279  | 28  | 1876832 | 491992  | 0 | 4  | 0 | 0 | 25 | 33 | 13371360 | 6.06E-01 | 1 |
| CHMP7    | 490797  | 288  | 41  | 1159492 | 333572  | 0 | 3  | 3 | 0 | 9  | 5  | 3213612  | 6.06E-01 | 1 |
| FBXO39   | 936146  | 438  | 5   | 1137064 | 295124  | 0 | 3  | 0 | 0 | 31 | 17 | 8079064  | 6.06E-01 | 1 |
| PTPN22   | 326668  | 406  | 15  | 2154156 | 542544  | 0 | 11 | 4 | 0 | 21 | 27 | 8646172  | 6.06E-01 | 1 |
| PDCD10   | 145528  | 766  | -10 | 570312  | 137772  | 0 | 2  | 1 | 0 | 15 | 23 | 7478848  | 6.06E-01 | 1 |
| HAS2     | 25994   | 485  | -22 | 1404776 | 377716  | 0 | 5  | 0 | 0 | 3  | 4  | 1838384  | 6.06E-01 | 1 |
| SLC35B3  | 294217  | 804  | -11 | 1044504 | 286224  | 0 | 3  | 0 | 0 | 13 | 16 | 4709880  | 6.06E-01 | 1 |
| HAGH     | 1604603 | 288  | 36  | 788184  | 236028  | 0 | 2  | 0 | 0 | 50 | 49 | 20717064 | 6.06E-01 | 1 |
| SMTNL2   | 1239739 | 318  | 24  | 1148456 | 363832  | 0 | 3  | 0 | 0 | 43 | 38 | 15910708 | 6.06E-01 | 1 |
| LRRC47   | 249433  | 341  | 28  | 1415812 | 483092  | 0 | 3  | 1 | 0 | 50 | 57 | 18706732 | 6.06E-01 | 1 |
| MAOB     | 66825   | NaN  | 22  | 1354580 | 374512  | 0 | 2  | 0 | 0 | 40 | 44 | 16364608 | 6.06E-01 | 1 |

|          |         |      |     |         |         |   |    |   |   |    |    |          |          |   |
|----------|---------|------|-----|---------|---------|---|----|---|---|----|----|----------|----------|---|
| RRBP1    | 580543  | 347  | 0   | 2539704 | 696336  | 0 | 10 | 1 | 0 | 50 | 58 | 21907172 | 6.06E-01 | 1 |
| CDCP1    | 513877  | 326  | 46  | 2106452 | 615880  | 0 | 6  | 1 | 0 | 24 | 21 | 9380956  | 6.06E-01 | 1 |
| DLK1     | 383705  | 323  | 2   | 967964  | 279460  | 0 | 3  | 1 | 0 | 50 | 68 | 24664036 | 6.06E-01 | 1 |
| SPINK8   | 1054170 | 263  | 37  | 270204  | 60876   | 0 | 1  | 0 | 0 | 50 | 63 | 18179140 | 6.06E-01 | 1 |
| TOMM20L  | 290701  | 552  | 46  | 407620  | 103952  | 0 | 1  | 1 | 0 | 18 | 22 | 7982232  | 6.06E-01 | 1 |
| RIN3     | 447158  | 623  | 42  | 2437532 | 760060  | 0 | 9  | 4 | 0 | 50 | 75 | 23586424 | 6.06E-01 | 1 |
| FAM83C   | 1290513 | 170  | 45  | 1798868 | 610540  | 0 | 6  | 2 | 0 | 36 | 55 | 15300168 | 6.06E-01 | 1 |
| PCGF5    | 190999  | 410  | 3   | 695980  | 161624  | 0 | 1  | 0 | 0 | 50 | 43 | 21117564 | 6.06E-01 | 1 |
| SMCP     | 59999   | 804  | 12  | 311144  | 67996   | 0 | 1  | 0 | 0 | 50 | 65 | 21559004 | 6.07E-01 | 1 |
| C16orf90 | 805495  | 246  | 39  | 453188  | 141688  | 0 | 1  | 0 | 0 | 50 | 45 | 22037468 | 6.07E-01 | 1 |
| BTBD9    | 295241  | 821  | 32  | 1666436 | 448204  | 0 | 3  | 1 | 0 | 50 | 46 | 19749456 | 6.07E-01 | 1 |
| STOML3   | 181679  | 1010 | -2  | 767180  | 227128  | 0 | 2  | 1 | 0 | 13 | 11 | 5049860  | 6.07E-01 | 1 |
| OR56A1   | 432250  | 877  | -13 | 781776  | 244572  | 0 | 3  | 1 | 0 | 50 | 63 | 18144964 | 6.07E-01 | 1 |
| TM4SF19  | 1164213 | 231  | 36  | 519404  | 169456  | 0 | 1  | 1 | 0 | 6  | 8  | 2119624  | 6.07E-01 | 1 |
| KANK4    | 280646  | 378  | 0   | 2482744 | 746888  | 0 | 7  | 2 | 0 | 17 | 21 | 10868324 | 6.07E-01 | 1 |
| SYPL1    | 327117  | 336  | 29  | 667856  | 190816  | 0 | 2  | 1 | 0 | 22 | 20 | 7801740  | 6.07E-01 | 1 |
| RBM45    | 234602  | 603  | 21  | 1238524 | 323960  | 0 | 3  | 1 | 0 | 11 | 8  | 4753312  | 6.07E-01 | 1 |
| BAZ2A    | 2782714 | 164  | 50  | 4810272 | 1416168 | 0 | 12 | 3 | 0 | 5  | 29 | 7463896  | 6.07E-01 | 1 |
| PARK7    | 387339  | 207  | 26  | 491636  | 142756  | 0 | 2  | 1 | 0 | 13 | 18 | 4984712  | 6.07E-01 | 1 |
| TMEFF1   | 238688  | 591  | -11 | 1002140 | 257032  | 0 | 3  | 1 | 0 | 50 | 49 | 19310152 | 6.07E-01 | 1 |
| ZNF85    | 157327  | 1055 | -68 | 1555364 | 367036  | 0 | 8  | 2 | 0 | 10 | 7  | 1313996  | 6.08E-01 | 1 |
| APPL1    | 427002  | 389  | 33  | 1893564 | 473124  | 0 | 5  | 0 | 0 | 13 | 5  | 3556440  | 6.08E-01 | 1 |
| KRT6C    | 1194800 | 389  | 29  | 1422220 | 424352  | 0 | 6  | 1 | 0 | 50 | 64 | 18116128 | 6.08E-01 | 1 |
| SURF2    | 1827885 | 416  | 28  | 668568  | 180492  | 0 | 2  | 0 | 0 | 50 | 47 | 17145316 | 6.08E-01 | 1 |
| BNIP1    | 1614665 | 165  | 40  | 915276  | 270204  | 0 | 3  | 0 | 0 | 50 | 62 | 20369964 | 6.08E-01 | 1 |
| RCCD1    | 793838  | 291  | 37  | 933788  | 299752  | 0 | 3  | 0 | 0 | 18 | 20 | 7402664  | 6.08E-01 | 1 |
| TRIP6    | 1339207 | 433  | 48  | 1183700 | 378784  | 0 | 2  | 2 | 0 | 17 | 24 | 8713456  | 6.08E-01 | 1 |
| VCAM1    | 277299  | 899  | -6  | 1886444 | 518692  | 0 | 12 | 4 | 0 | 3  | 7  | 1893920  | 6.08E-01 | 1 |
| SNX14    | 393321  | 384  | 19  | 2530092 | 623712  | 0 | 7  | 2 | 0 | 50 | 61 | 23125404 | 6.08E-01 | 1 |
| SYCP1    | 601139  | 601  | 2   | 2673916 | 588824  | 0 | 8  | 1 | 0 | 6  | 7  | 3569612  | 6.08E-01 | 1 |
| OR2M5    | 19998   | 935  | -32 | 771452  | 230332  | 0 | 8  | 2 | 0 | 7  | 15 | 2404780  | 6.08E-01 | 1 |
| EEFSEC   | 858998  | 410  | 48  | 1484520 | 456036  | 0 | 6  | 2 | 0 | 50 | 75 | 23112588 | 6.08E-01 | 1 |
| GABRA3   | 237855  | NaN  | -32 | 1264156 | 353864  | 0 | 4  | 2 | 0 | 50 | 91 | 20918560 | 6.08E-01 | 1 |



|          |         |      |     |         |        |   |    |   |   |    |     |          |          |   |
|----------|---------|------|-----|---------|--------|---|----|---|---|----|-----|----------|----------|---|
| RBPJL    | 1005559 | 233  | 36  | 1315776 | 395160 | 0 | 5  | 4 | 0 | 20 | 21  | 7219324  | 6.09E-01 | 1 |
| ADD45GII | 1886809 | 335  | 40  | 548952  | 174084 | 0 | 2  | 1 | 0 | 50 | 62  | 18190176 | 6.09E-01 | 1 |
| AFAP1L1  | 386336  | 380  | 25  | 1991464 | 549308 | 0 | 4  | 0 | 0 | 36 | 22  | 15847696 | 6.09E-01 | 1 |
| ATP5I    | 639827  | 489  | 12  | 190816  | 50552  | 0 | 1  | 1 | 0 | 3  | 5   | 1246712  | 6.09E-01 | 1 |
| DAP3     | 2240116 | 152  | 32  | 1056252 | 273408 | 0 | 4  | 1 | 0 | 50 | 72  | 23667592 | 6.09E-01 | 1 |
| CCNI2    | 717412  | 356  | 59  | 935568  | 275544 | 0 | 1  | 0 | 0 | 50 | 46  | 17209040 | 6.09E-01 | 1 |
| TDRD7    | 489355  | 386  | 36  | 2834828 | 754720 | 0 | 8  | 5 | 0 | 50 | 60  | 19681460 | 6.09E-01 | 1 |
| CCDC89   | 325720  | 554  | -19 | 950164  | 251336 | 0 | 4  | 1 | 0 | 50 | 100 | 24725980 | 6.09E-01 | 1 |
| NPPA     | 519155  | 207  | 43  | 381632  | 116056 | 0 | 1  | 1 | 0 | 23 | 18  | 8123564  | 6.09E-01 | 1 |
| RIMS3    | 678456  | 421  | 20  | 777504  | 238164 | 0 | 2  | 2 | 0 | 50 | 65  | 22572536 | 6.09E-01 | 1 |
| SRPK3    | 2103463 | NaN  | 30  | 1464940 | 416876 | 0 | 5  | 2 | 0 | 16 | 21  | 8064112  | 6.09E-01 | 1 |
| P2RX5    | 504736  | 354  | 20  | 1104668 | 299752 | 0 | 2  | 1 | 0 | 50 | 62  | 23395252 | 6.09E-01 | 1 |
| CHORDC1  | 132433  | 1152 | -21 | 898188  | 211464 | 0 | 3  | 1 | 0 | 16 | 21  | 7212204  | 6.09E-01 | 1 |
| TMC2     | 778654  | 450  | 41  | 2345328 | 644004 | 0 | 8  | 0 | 0 | 9  | 7   | 3340704  | 6.09E-01 | 1 |
| ZNF140   | 558706  | 834  | 17  | 1192600 | 291920 | 0 | 3  | 0 | 0 | 37 | 24  | 11504496 | 6.10E-01 | 1 |
| CDHR2    | 593410  | 318  | 45  | 3338924 | 996088 | 0 | 11 | 2 | 0 | 13 | 12  | 4640104  | 6.10E-01 | 1 |
| SECISBP2 | 163101  | 627  | 15  | 2214320 | 595588 | 0 | 5  | 1 | 0 | 9  | 3   | 3168756  | 6.10E-01 | 1 |
| GLOD4    | 662733  | 483  | 10  | 792456  | 203988 | 0 | 2  | 0 | 0 | 28 | 22  | 9770420  | 6.10E-01 | 1 |
| CLEC2B   | 295505  | 634  | 25  | 405484  | 92204  | 0 | 1  | 0 | 0 | 50 | 49  | 21223652 | 6.10E-01 | 1 |
| CTSK     | 1818753 | 188  | 35  | 862232  | 223924 | 0 | 3  | 1 | 0 | 50 | 99  | 23376028 | 6.10E-01 | 1 |
| PCYOX1   | 669606  | 164  | 36  | 1291212 | 353508 | 0 | 2  | 1 | 0 | 50 | 57  | 21567192 | 6.10E-01 | 1 |
| B3GNT3   | 1216364 | 212  | 37  | 908156  | 295480 | 0 | 1  | 1 | 0 | 50 | 49  | 17585332 | 6.10E-01 | 1 |
| PELI2    | 315208  | 818  | 10  | 1068712 | 301532 | 0 | 4  | 2 | 0 | 50 | 61  | 18646568 | 6.10E-01 | 1 |
| STAM     | 488136  | 364  | 7   | 1420084 | 368816 | 0 | 3  | 1 | 0 | 50 | 60  | 25802880 | 6.10E-01 | 1 |
| CHURC1   | 515337  | 275  | 41  | 310432  | 69776  | 0 | 1  | 1 | 0 | 2  | 1   | 551088   | 6.10E-01 | 1 |
| CDC45    | 710221  | 298  | 19  | 1598796 | 404772 | 0 | 5  | 3 | 0 | 10 | 9   | 3384492  | 6.10E-01 | 1 |
| LYSMD3   | 86012   | 780  | 7   | 784980  | 207192 | 0 | 2  | 1 | 0 | 50 | 52  | 20605992 | 6.10E-01 | 1 |
| MAGEF1   | 1301642 | 485  | 36  | 760060  | 226772 | 0 | 1  | 0 | 0 | 50 | 92  | 26331896 | 6.10E-01 | 1 |
| FAM83H   | 2182434 | 229  | 28  | 2835184 | 962624 | 0 | 13 | 2 | 0 | 50 | 80  | 25006864 | 6.10E-01 | 1 |
| UCMA     | 246179  | 354  | 35  | 376648  | 87932  | 0 | 1  | 0 | 0 | 50 | 50  | 18895768 | 6.10E-01 | 1 |
| RASL10B  | 675201  | 196  | 3   | 508368  | 153792 | 0 | 1  | 0 | 0 | 50 | 52  | 20535860 | 6.10E-01 | 1 |
| EEF1D    | 2183482 | 235  | 37  | 1619444 | 490924 | 0 | 2  | 0 | 0 | 50 | 40  | 19636960 | 6.10E-01 | 1 |
| DGCR6L   | 605373  | 292  | 43  | 557496  | 169812 | 0 | 1  | 0 | 0 | 30 | 25  | 15207964 | 6.10E-01 | 1 |

|          |         |     |     |         |         |   |    |   |   |    |    |          |          |   |
|----------|---------|-----|-----|---------|---------|---|----|---|---|----|----|----------|----------|---|
| NSUN7    | 238024  | 202 | 47  | 1836960 | 513708  | 0 | 5  | 0 | 0 | 26 | 25 | 9545784  | 6.11E-01 | 1 |
| ACTRT1   | 938     | NaN | -35 | 932720  | 275188  | 0 | 3  | 0 | 0 | 16 | 26 | 4889304  | 6.11E-01 | 1 |
| EXOC7    | 1611239 | 218 | 22  | 1927384 | 514064  | 0 | 7  | 3 | 0 | 50 | 86 | 24078416 | 6.11E-01 | 1 |
| TCP10L   | 265057  | 182 | 52  | 549664  | 158420  | 0 | 2  | 0 | 0 | 50 | 53 | 17819580 | 6.11E-01 | 1 |
| ZMYM6    | 719158  | 490 | 30  | 3428992 | 883592  | 0 | 9  | 2 | 0 | 33 | 43 | 16452184 | 6.11E-01 | 1 |
| MGAT2    | 563227  | 409 | -4  | 1113568 | 321824  | 0 | 2  | 2 | 0 | 50 | 55 | 20194100 | 6.11E-01 | 1 |
| BCAP29   | 512690  | 753 | 26  | 940908  | 211464  | 0 | 2  | 1 | 0 | 49 | 38 | 18677184 | 6.11E-01 | 1 |
| GPSM3    | 2119974 | 392 | 28  | 402992  | 129940  | 0 | 1  | 0 | 0 | 50 | 62 | 23774036 | 6.11E-01 | 1 |
| CTDSPL2  | 697417  | 534 | 37  | 1222504 | 325028  | 0 | 4  | 0 | 0 | 1  | 3  | 2052340  | 6.11E-01 | 1 |
| SLC12A5  | 630342  | 381 | 51  | 2959072 | 860096  | 0 | 15 | 6 | 0 | 27 | 45 | 11933120 | 6.11E-01 | 1 |
| DUSP16   | 748543  | 157 | 30  | 1673912 | 481312  | 0 | 6  | 0 | 0 | 17 | 17 | 7943072  | 6.11E-01 | 1 |
| GJA3     | 405200  | 472 | 50  | 1058744 | 342472  | 0 | 3  | 1 | 0 | 50 | 66 | 25477852 | 6.11E-01 | 1 |
| MAPK14   | 892075  | 407 | 36  | 1110720 | 239232  | 0 | 1  | 1 | 0 | 50 | 39 | 18159560 | 6.11E-01 | 1 |
| PRKD2    | 1153249 | 224 | 32  | 2231052 | 657888  | 0 | 7  | 5 | 0 | 34 | 39 | 12948076 | 6.11E-01 | 1 |
| CGB5     | 2070141 | 200 | 35  | 404416  | 138128  | 0 | 2  | 1 | 0 | 12 | 19 | 4170896  | 6.12E-01 | 1 |
| OR6A2    | 427462  | 681 | 8   | 799932  | 250980  | 0 | 4  | 1 | 0 | 50 | 71 | 18227912 | 6.12E-01 | 1 |
| AMIGO2   | 150007  | 380 | -12 | 1292636 | 387328  | 0 | 4  | 0 | 0 | 29 | 36 | 13688556 | 6.12E-01 | 1 |
| BARX2    | 287214  | 440 | -19 | 703456  | 208616  | 0 | 2  | 1 | 0 | 50 | 53 | 19869784 | 6.12E-01 | 1 |
| FGGY     | 60575   | 728 | 4   | 1501252 | 412604  | 0 | 5  | 3 | 0 | 12 | 13 | 4522268  | 6.12E-01 | 1 |
| IQCH     | 275948  | 360 | 31  | 2782852 | 733004  | 0 | 7  | 2 | 0 | 50 | 38 | 19125388 | 6.12E-01 | 1 |
| RARA     | 1350242 | 191 | 23  | 1307232 | 382344  | 0 | 5  | 0 | 0 | 50 | 69 | 21148536 | 6.12E-01 | 1 |
| PPP2R5E  | 237658  | 445 | 20  | 1247068 | 307940  | 0 | 4  | 0 | 0 | 50 | 64 | 22834196 | 6.12E-01 | 1 |
| AFMID    | 605209  | 191 | 26  | 819156  | 217872  | 0 | 2  | 1 | 0 | 15 | 16 | 7419040  | 6.12E-01 | 1 |
| KIAA0232 | 500642  | 179 | 50  | 3555016 | 947672  | 0 | 10 | 1 | 0 | 2  | 2  | 1984700  | 6.12E-01 | 1 |
| R5-ARHG/ | 310964  | 487 | 28  | 1456396 | 413672  | 0 | 3  | 1 | 0 | 45 | 49 | 17567532 | 6.12E-01 | 1 |
| KAAG1    | 390563  | 612 | -3  | 311500  | 69776   | 0 | 1  | 0 | 0 | 50 | 64 | 20353944 | 6.12E-01 | 1 |
| FUT8     | 412062  | 875 | 38  | 1577792 | 409756  | 0 | 5  | 0 | 0 | 50 | 38 | 15463216 | 6.12E-01 | 1 |
| OSBPL5   | 513529  | 333 | 53  | 2255616 | 653616  | 0 | 6  | 2 | 0 | 50 | 54 | 18972308 | 6.12E-01 | 1 |
| ZNF540   | 382032  | 888 | -56 | 1722684 | 412248  | 0 | 6  | 2 | 0 | 50 | 63 | 18541548 | 6.12E-01 | 1 |
| CRHR1    | 408198  | 563 | 16  | 1154864 | 326452  | 0 | 2  | 1 | 0 | 27 | 29 | 11423328 | 6.12E-01 | 1 |
| SPG11    | 666585  | 441 | 35  | 6362076 | 1637244 | 0 | 13 | 3 | 0 | 5  | 4  | 4145264  | 6.12E-01 | 1 |
| CCDC78   | 1207790 | 194 | 33  | 1125316 | 336776  | 0 | 4  | 0 | 0 | 17 | 19 | 6751184  | 6.12E-01 | 1 |
| ZNF454   | 95669   | 845 | 10  | 1364904 | 323604  | 0 | 3  | 1 | 0 | 50 | 71 | 23161360 | 6.12E-01 | 1 |

|          |         |     |     |          |         |   |    |    |   |    |     |          |          |   |
|----------|---------|-----|-----|----------|---------|---|----|----|---|----|-----|----------|----------|---|
| C8G      | 1979517 | 188 | 34  | 519048   | 159132  | 0 | 2  | 0  | 0 | 50 | 78  | 21046364 | 6.12E-01 | 1 |
| CKAP2    | 345539  | 356 | 45  | 1756148  | 469564  | 0 | 4  | 2  | 0 | 50 | 53  | 18811040 | 6.12E-01 | 1 |
| OR2T33   | 18846   | 936 | -35 | 787116   | 240300  | 0 | 5  | 3  | 0 | 6  | 7   | 1703816  | 6.12E-01 | 1 |
| KRT16    | 1494501 | 323 | 11  | 1192956  | 355644  | 0 | 5  | 1  | 0 | 20 | 34  | 10955900 | 6.12E-01 | 1 |
| CENPK    | 424356  | 444 | 25  | 735140   | 168388  | 0 | 2  | 1  | 0 | 50 | 63  | 24355384 | 6.13E-01 | 1 |
| PEX11B   | NaN     | NaN | NaN | 647920   | 217160  | 0 | 2  | 1  | 0 | 50 | 117 | 39862744 | 6.13E-01 | 1 |
| CTAGE9   | NaN     | NaN | NaN | 1953728  | 538984  | 0 | 7  | 3  | 0 | 50 | 119 | 40184568 | 6.13E-01 | 1 |
| CD46     | 321738  | 372 | 8   | 1136352  | 262728  | 0 | 4  | 1  | 0 | 50 | 50  | 19979076 | 6.13E-01 | 1 |
| AFF1     | 270752  | 518 | 48  | 3130308  | 881100  | 0 | 8  | 2  | 0 | 50 | 50  | 19488152 | 6.13E-01 | 1 |
| DNAJA4   | 447425  | 371 | 54  | 1164832  | 291920  | 0 | 2  | 1  | 0 | 50 | 56  | 19480320 | 6.13E-01 | 1 |
| AQP5     | 1033911 | 220 | 48  | 643292   | 221788  | 0 | 2  | 1  | 0 | 50 | 62  | 21015036 | 6.13E-01 | 1 |
| SPIRE1   | 483118  | 292 | 49  | 1955508  | 540408  | 0 | 3  | 2  | 0 | 50 | 41  | 19655472 | 6.13E-01 | 1 |
| LARS2    | 439463  | 363 | 38  | 2347108  | 634748  | 0 | 4  | 0  | 0 | 16 | 18  | 8041684  | 6.13E-01 | 1 |
| DHX35    | 262965  | 581 | 31  | 1839808  | 507656  | 0 | 6  | 1  | 0 | 50 | 55  | 21096204 | 6.13E-01 | 1 |
| GABRE    | 127993  | NaN | -10 | 1304740  | 356000  | 0 | 5  | 2  | 0 | 50 | 75  | 26343644 | 6.13E-01 | 1 |
| OR8B12   | 171574  | 746 | -1  | 762552   | 231756  | 0 | 7  | 1  | 0 | 6  | 10  | 1750808  | 6.14E-01 | 1 |
| DNASE2B  | 235919  | 769 | -13 | 943044   | 242436  | 0 | 3  | 1  | 0 | 50 | 76  | 18267428 | 6.14E-01 | 1 |
| ARPC1A   | 903923  | 263 | 51  | 978288   | 248844  | 0 | 2  | 2  | 0 | 10 | 14  | 5285176  | 6.14E-01 | 1 |
| ST3GAL2  | 935790  | 134 | 42  | 895340   | 250624  | 0 | 3  | 0  | 0 | 50 | 60  | 24635556 | 6.14E-01 | 1 |
| SLC39A3  | 1354357 | 291 | 25  | 835532   | 291208  | 0 | 2  | 0  | 0 | 50 | 54  | 21517708 | 6.14E-01 | 1 |
| PKHD1L1  | 134643  | 732 | 6   | 10942728 | 2983992 | 0 | 33 | 13 | 0 | 50 | 76  | 24883332 | 6.14E-01 | 1 |
| PIGS     | 1517567 | 225 | 24  | 1403352  | 425064  | 0 | 10 | 0  | 0 | 2  | 5   | 1431476  | 6.14E-01 | 1 |
| RPH3AL   | 231893  | 591 | 2   | 807408   | 239232  | 0 | 2  | 0  | 0 | 50 | 44  | 18925672 | 6.14E-01 | 1 |
| WDR26    | 519341  | 256 | 18  | 1698832  | 477752  | 0 | 5  | 2  | 0 | 50 | 44  | 18352512 | 6.14E-01 | 1 |
| CLCN3    | 186100  | 464 | 12  | 2243156  | 590248  | 0 | 5  | 1  | 0 | 50 | 53  | 21919632 | 6.14E-01 | 1 |
| OR2F2    | 368507  | 732 | -11 | 769316   | 248488  | 0 | 3  | 2  | 0 | 50 | 64  | 17819224 | 6.14E-01 | 1 |
| RPRD1A   | 370331  | 430 | 22  | 813816   | 216804  | 0 | 2  | 1  | 0 | 50 | 60  | 25742360 | 6.14E-01 | 1 |
| C17orf74 | 1906324 | 206 | 33  | 1239236  | 381988  | 0 | 4  | 2  | 0 | 50 | 87  | 23542992 | 6.14E-01 | 1 |
| MON2     | 299830  | 359 | -1  | 4416180  | 1233540 | 0 | 10 | 1  | 0 | 14 | 13  | 7829152  | 6.14E-01 | 1 |
| PPIAL4A  | NaN     | NaN | NaN | 1260240  | 338556  | 0 | 2  | 0  | 0 | 50 | 116 | 39984140 | 6.14E-01 | 1 |
| TUBB3    | 1131847 | 221 | 40  | 1143472  | 316484  | 0 | 5  | 1  | 0 | 50 | 53  | 16265996 | 6.15E-01 | 1 |
| XIRP1    | 163147  | 452 | 44  | 4474564  | 1437884 | 0 | 14 | 6  | 0 | 28 | 41  | 14241424 | 6.15E-01 | 1 |
| ALX4     | 301098  | 575 | 9   | 1024212  | 308652  | 0 | 3  | 1  | 0 | 50 | 54  | 20785416 | 6.15E-01 | 1 |

|         |         |      |     |         |         |   |    |   |   |    |     |          |          |   |
|---------|---------|------|-----|---------|---------|---|----|---|---|----|-----|----------|----------|---|
| TMEM9B  | 548433  | 243  | 21  | 506944  | 147740  | 0 | 1  | 0 | 0 | 50 | 57  | 20741984 | 6.15E-01 | 1 |
| RIPPLY1 | 148608  | NaN  | 22  | 388396  | 113564  | 0 | 1  | 0 | 0 | 50 | 128 | 42308820 | 6.15E-01 | 1 |
| OR10Q1  | 637499  | 828  | -25 | 777860  | 251692  | 0 | 3  | 0 | 0 | 50 | 51  | 16635524 | 6.15E-01 | 1 |
| RELN    | 291011  | 954  | 7   | 9008936 | 2353516 | 0 | 30 | 6 | 0 | 25 | 35  | 13142808 | 6.15E-01 | 1 |
| HPX     | 424837  | 471  | 17  | 1194380 | 329656  | 0 | 2  | 1 | 0 | 50 | 55  | 20339348 | 6.15E-01 | 1 |
| NAGLU   | 1993535 | 162  | 27  | 1816312 | 588824  | 0 | 4  | 0 | 0 | 14 | 15  | 6959800  | 6.15E-01 | 1 |
| FZD7    | 363643  | 441  | 36  | 1394452 | 449984  | 0 | 7  | 4 | 0 | 41 | 58  | 15814944 | 6.15E-01 | 1 |
| TAF6    | 1299015 | 205  | 52  | 1697408 | 536848  | 0 | 4  | 1 | 0 | 35 | 32  | 12810304 | 6.15E-01 | 1 |
| MEM176I | 734961  | 689  | 14  | 686368  | 210752  | 0 | 2  | 0 | 0 | 50 | 53  | 19509868 | 6.15E-01 | 1 |
| PLS1    | 435882  | 406  | 28  | 1658960 | 423640  | 0 | 6  | 1 | 0 | 34 | 50  | 15129288 | 6.15E-01 | 1 |
| BCL2L12 | 1733181 | 195  | 36  | 819868  | 279104  | 0 | 2  | 1 | 0 | 9  | 8   | 4296208  | 6.15E-01 | 1 |
| KHDC1L  | NaN     | NaN  | NaN | 333572  | 90424   | 0 | 1  | 0 | 0 | 50 | 116 | 39736008 | 6.15E-01 | 1 |
| CCDC37  | 295496  | 600  | 35  | 1616952 | 412248  | 0 | 5  | 2 | 0 | 14 | 12  | 4828784  | 6.16E-01 | 1 |
| MMAA    | 224882  | 1168 | 19  | 1063372 | 304736  | 0 | 3  | 1 | 0 | 50 | 36  | 17247488 | 6.16E-01 | 1 |
| PTCD1   | 1327454 | 288  | 60  | 1744044 | 531864  | 0 | 6  | 3 | 0 | 50 | 58  | 17222924 | 6.16E-01 | 1 |
| EXOC8   | 377235  | 569  | 2   | 1797088 | 531152  | 0 | 7  | 2 | 0 | 50 | 74  | 24456844 | 6.16E-01 | 1 |
| RNPC3   | NaN     | NaN  | NaN | 370952  | 108580  | 0 | 1  | 0 | 0 | 50 | 116 | 39754164 | 6.16E-01 | 1 |
| RHOV    | 1036414 | 172  | 51  | 582060  | 185832  | 0 | 2  | 1 | 0 | 50 | 67  | 20324396 | 6.16E-01 | 1 |
| RTN4IP1 | 223177  | 271  | 40  | 1019584 | 286580  | 0 | 4  | 0 | 0 | 50 | 67  | 19271348 | 6.16E-01 | 1 |
| CTCFL   | 181464  | 562  | 10  | 1735856 | 434320  | 0 | 3  | 1 | 0 | 50 | 49  | 22374600 | 6.16E-01 | 1 |
| TWSG1   | 499362  | 387  | 43  | 591672  | 143112  | 0 | 2  | 1 | 0 | 41 | 49  | 16034240 | 6.16E-01 | 1 |
| ENPP6   | 256949  | 424  | -5  | 1132436 | 310432  | 0 | 2  | 1 | 0 | 50 | 34  | 20546184 | 6.16E-01 | 1 |
| CDK17   | 248700  | 405  | 26  | 1423288 | 362408  | 0 | 5  | 0 | 0 | 38 | 43  | 16252112 | 6.16E-01 | 1 |
| CCR4    | 511282  | 469  | 17  | 900324  | 260592  | 0 | 3  | 1 | 0 | 50 | 50  | 16803556 | 6.16E-01 | 1 |
| MEOX1   | 1180329 | 165  | 16  | 657176  | 170524  | 0 | 2  | 0 | 0 | 38 | 38  | 13184816 | 6.16E-01 | 1 |
| ZNF347  | 392290  | 946  | -49 | 2166260 | 545392  | 0 | 7  | 2 | 0 | 50 | 50  | 16685008 | 6.16E-01 | 1 |
| SH2D1A  | 216982  | NaN  | -14 | 334284  | 91848   | 0 | 1  | 1 | 0 | 50 | 55  | 16552576 | 6.16E-01 | 1 |
| DNAJB13 | 533576  | 196  | 41  | 828056  | 217516  | 0 | 3  | 1 | 0 | 50 | 52  | 16080164 | 6.17E-01 | 1 |
| GAS2L2  | 675201  | 196  | 3   | 2147036 | 699184  | 0 | 5  | 5 | 0 | 50 | 52  | 20535860 | 6.17E-01 | 1 |
| ZNF222  | 533136  | 558  | -35 | 1312928 | 302956  | 0 | 4  | 0 | 0 | 50 | 58  | 16442928 | 6.17E-01 | 1 |
| FAM13A  | 160978  | 576  | 8   | 2712008 | 700252  | 0 | 7  | 1 | 0 | 50 | 49  | 20735932 | 6.17E-01 | 1 |
| SPRY3   | NaN     | NaN  | NaN | 710932  | 215024  | 0 | 2  | 0 | 0 | 50 | 116 | 39860608 | 6.17E-01 | 1 |
| COTL1   | 575674  | 182  | 24  | 372376  | 98612   | 0 | 1  | 0 | 0 | 50 | 65  | 23856628 | 6.17E-01 | 1 |

|          |         |     |     |         |        |   |    |   |   |    |     |          |          |   |
|----------|---------|-----|-----|---------|--------|---|----|---|---|----|-----|----------|----------|---|
| FKBP1A   | 394062  | 427 | 40  | 288716  | 77608  | 0 | 1  | 1 | 0 | 19 | 31  | 9934892  | 6.17E-01 | 1 |
| SARS     | 1000045 | 287 | 32  | 1339628 | 355288 | 0 | 5  | 0 | 0 | 5  | 13  | 3974740  | 6.17E-01 | 1 |
| SERPINB9 | 457673  | 201 | 41  | 969744  | 263796 | 0 | 3  | 0 | 0 | 50 | 47  | 16458236 | 6.17E-01 | 1 |
| TMEM40   | 487514  | 176 | 35  | 635460  | 161268 | 0 | 2  | 0 | 0 | 50 | 61  | 20316208 | 6.17E-01 | 1 |
| ENAH     | 744021  | 207 | 2   | 1525104 | 431472 | 0 | 5  | 0 | 0 | 10 | 10  | 3617672  | 6.17E-01 | 1 |
| OR7G3    | 311030  | 471 | -63 | 757568  | 244216 | 0 | 3  | 1 | 0 | 50 | 102 | 27434784 | 6.17E-01 | 1 |
| ARMCX3   | 329999  | NaN | 8   | 946604  | 270916 | 0 | 1  | 1 | 0 | 50 | 59  | 21254980 | 6.17E-01 | 1 |
| MRPL1    | 159162  | 508 | 15  | 865080  | 213600 | 0 | 2  | 1 | 0 | 50 | 55  | 20732016 | 6.17E-01 | 1 |
| EPHA3    | 27204   | NaN | -18 | 2562488 | 684232 | 0 | 15 | 4 | 0 | 6  | 13  | 2867580  | 6.17E-01 | 1 |
| CHAF1B   | 289668  | 352 | 52  | 1442868 | 406908 | 0 | 5  | 2 | 0 | 50 | 44  | 16524096 | 6.17E-01 | 1 |
| DNER     | 253305  | 456 | -3  | 1891784 | 524032 | 0 | 4  | 2 | 0 | 50 | 50  | 20503108 | 6.18E-01 | 1 |
| CALM2    | 811122  | 132 | 35  | 411892  | 90068  | 0 | 1  | 0 | 0 | 50 | 47  | 19691072 | 6.18E-01 | 1 |
| CMTM2    | 777342  | 214 | 9   | 631544  | 179068 | 0 | 2  | 0 | 0 | 50 | 68  | 21478904 | 6.18E-01 | 1 |
| LYPLA2   | 903441  | 254 | 32  | 603776  | 178000 | 0 | 2  | 0 | 0 | 50 | 57  | 18158136 | 6.18E-01 | 1 |
| ARNTL2   | 544579  | 377 | 40  | 1691000 | 421504 | 0 | 6  | 2 | 0 | 50 | 66  | 19666508 | 6.18E-01 | 1 |
| CCDC34   | 336836  | 378 | -21 | 1052336 | 257032 | 0 | 3  | 0 | 0 | 50 | 56  | 21832768 | 6.18E-01 | 1 |
| BMP7     | 207872  | 617 | -21 | 1105736 | 304024 | 0 | 3  | 0 | 0 | 33 | 50  | 19143900 | 6.18E-01 | 1 |
| FASTKD1  | 358154  | 404 | 30  | 2205420 | 569244 | 0 | 6  | 3 | 0 | 22 | 23  | 9071948  | 6.18E-01 | 1 |
| CAMP     | 1113209 | 193 | 40  | 435744  | 127092 | 0 | 1  | 0 | 0 | 50 | 47  | 15907504 | 6.18E-01 | 1 |
| PNPO     | 1183803 | 203 | 21  | 677112  | 187968 | 0 | 2  | 1 | 0 | 50 | 60  | 21372816 | 6.18E-01 | 1 |
| CCL15    | 779228  | 525 | 19  | 300108  | 77964  | 0 | 1  | 0 | 0 | 50 | 69  | 21358220 | 6.18E-01 | 1 |
| ATOH7    | 459384  | 251 | 17  | 370952  | 119260 | 0 | 1  | 1 | 0 | 45 | 51  | 19708160 | 6.18E-01 | 1 |
| SCNN1B   | 520509  | 611 | 32  | 1660384 | 444644 | 0 | 4  | 2 | 0 | 50 | 67  | 23209420 | 6.18E-01 | 1 |
| HOXC10   | 1257445 | 274 | 23  | 861520  | 243860 | 0 | 3  | 0 | 0 | 50 | 62  | 22406640 | 6.18E-01 | 1 |
| AHSA2    | 704383  | 371 | 36  | 366324  | 92916  | 0 | 1  | 0 | 0 | 50 | 69  | 26054572 | 6.18E-01 | 1 |
| INO80B   | 1069803 | 343 | 45  | 876828  | 288360 | 0 | 2  | 0 | 0 | 50 | 68  | 19848780 | 6.18E-01 | 1 |
| EIF4EBP1 | 672015  | 258 | 29  | 303312  | 88644  | 0 | 1  | 0 | 0 | 50 | 81  | 22003292 | 6.19E-01 | 1 |
| PPIL2    | 447011  | 252 | 56  | 1448920 | 332504 | 0 | 3  | 0 | 0 | 50 | 50  | 17980848 | 6.19E-01 | 1 |
| LYRM4    | 128806  | 502 | 24  | 469208  | 131008 | 0 | 1  | 0 | 0 | 50 | 44  | 21281324 | 6.19E-01 | 1 |
| ORM1     | 206775  | 425 | 4   | 532932  | 135636 | 0 | 1  | 0 | 0 | 50 | 33  | 18679320 | 6.19E-01 | 1 |
| OR7A17   | 963401  | 546 | 14  | 755788  | 235316 | 0 | 2  | 2 | 0 | 37 | 53  | 12940600 | 6.19E-01 | 1 |
| NR2F1    | 263987  | 505 | -1  | 1049844 | 317196 | 0 | 3  | 1 | 0 | 42 | 47  | 17046704 | 6.19E-01 | 1 |
| POU2F2   | 855248  | 369 | 32  | 1194736 | 349592 | 0 | 2  | 3 | 0 | 35 | 38  | 12991152 | 6.19E-01 | 1 |

|         |         |      |     |         |        |   |   |   |   |    |    |          |          |   |
|---------|---------|------|-----|---------|--------|---|---|---|---|----|----|----------|----------|---|
| CRNKL1  | 230275  | 685  | 10  | 2218236 | 563904 | 0 | 9 | 4 | 0 | 42 | 58 | 16975504 | 6.19E-01 | 1 |
| MRPL24  | 1649536 | 208  | 53  | 559632  | 159132 | 0 | 2 | 0 | 0 | 50 | 69 | 21716356 | 6.19E-01 | 1 |
| CREB3L4 | 2028800 | 222  | 34  | 1008904 | 298328 | 0 | 5 | 1 | 0 | 30 | 41 | 11118948 | 6.19E-01 | 1 |
| CES2    | 942986  | 142  | 34  | 1582064 | 464224 | 0 | 5 | 4 | 0 | 27 | 45 | 13673248 | 6.19E-01 | 1 |
| HES4    | 1971475 | 239  | 15  | 586332  | 221076 | 0 | 2 | 0 | 0 | 12 | 27 | 8570344  | 6.19E-01 | 1 |
| STX8    | 84658   | 634  | -10 | 626204  | 163048 | 0 | 2 | 1 | 0 | 29 | 29 | 9743720  | 6.19E-01 | 1 |
| GABRG3  | 20652   | 1307 | -54 | 1216096 | 321824 | 0 | 5 | 2 | 0 | 28 | 69 | 16104372 | 6.20E-01 | 1 |
| POP7    | 1483965 | 336  | 46  | 342472  | 113564 | 0 | 1 | 0 | 0 | 50 | 89 | 28030016 | 6.20E-01 | 1 |
| CDC37   | 1956832 | 207  | 38  | 1004988 | 239232 | 0 | 4 | 0 | 0 | 50 | 73 | 23497424 | 6.20E-01 | 1 |
| OPRD1   | 765350  | 208  | 27  | 904952  | 298684 | 0 | 3 | 1 | 0 | 50 | 59 | 21238248 | 6.20E-01 | 1 |
| COX15   | 422578  | 304  | 12  | 1092564 | 331080 | 0 | 3 | 0 | 0 | 18 | 19 | 8553256  | 6.20E-01 | 1 |
| ZFPL1   | 3267059 | 207  | 46  | 778928  | 247420 | 0 | 3 | 1 | 0 | 50 | 74 | 20482816 | 6.20E-01 | 1 |
| POU2F1  | 399046  | 569  | 0   | 1863660 | 584196 | 0 | 5 | 2 | 0 | 21 | 29 | 10300148 | 6.20E-01 | 1 |
| DUSP1   | 537128  | 180  | 44  | 904596  | 287292 | 0 | 4 | 0 | 0 | 50 | 59 | 18403064 | 6.20E-01 | 1 |
| HSD17B4 | 302141  | 472  | 27  | 1933792 | 525812 | 0 | 5 | 0 | 0 | 33 | 25 | 12692824 | 6.20E-01 | 1 |
| MADCAM  | 1509324 | 255  | -16 | 919192  | 327164 | 0 | 1 | 0 | 0 | 50 | 52 | 17766892 | 6.20E-01 | 1 |
| OR51B6  | 100115  | 1056 | 1   | 771096  | 230688 | 0 | 2 | 1 | 0 | 30 | 18 | 7873652  | 6.20E-01 | 1 |
| MTIF3   | 306964  | 570  | 60  | 739056  | 195444 | 0 | 3 | 0 | 0 | 37 | 36 | 9927772  | 6.20E-01 | 1 |
| ZNF143  | 566722  | 135  | 27  | 1662164 | 449272 | 0 | 6 | 1 | 0 | 32 | 25 | 10470672 | 6.20E-01 | 1 |
| LTF     | 266701  | 565  | 34  | 1841944 | 506588 | 0 | 9 | 0 | 0 | 2  | 1  | 858672   | 6.20E-01 | 1 |
| TYROBP  | 1060028 | 321  | 47  | 292632  | 91848  | 0 | 1 | 0 | 0 | 50 | 67 | 19297692 | 6.20E-01 | 1 |
| OR14I1  | 141426  | 710  | -10 | 761128  | 238520 | 0 | 3 | 2 | 0 | 4  | 7  | 2673204  | 6.20E-01 | 1 |
| ZNF70   | 610486  | 266  | 30  | 1143828 | 292632 | 0 | 4 | 3 | 0 | 12 | 20 | 5342848  | 6.20E-01 | 1 |
| C9orf9  | 1952019 | 575  | 33  | 447848  | 112852 | 0 | 1 | 1 | 0 | 50 | 48 | 18580708 | 6.20E-01 | 1 |
| IQSEC3  | 241073  | 592  | 27  | 2984704 | 945536 | 0 | 8 | 4 | 0 | 50 | 56 | 22665808 | 6.21E-01 | 1 |
| C3orf38 | 123481  | 894  | 0   | 836956  | 228908 | 0 | 2 | 0 | 0 | 50 | 44 | 19702820 | 6.21E-01 | 1 |
| MCM2    | 679358  | 336  | 45  | 2317204 | 648632 | 0 | 5 | 2 | 0 | 12 | 11 | 5764352  | 6.21E-01 | 1 |
| S100A7  | 1140114 | 279  | 38  | 275900  | 61588  | 0 | 1 | 0 | 0 | 50 | 63 | 17848772 | 6.21E-01 | 1 |
| ACHE    | 1339207 | 433  | 48  | 1592388 | 537204 | 0 | 5 | 3 | 0 | 17 | 24 | 8713456  | 6.21E-01 | 1 |
| DNAJB2  | 694442  | 193  | 44  | 845500  | 243860 | 0 | 3 | 0 | 0 | 50 | 75 | 22905396 | 6.21E-01 | 1 |
| NUS1    | 190019  | 639  | 3   | 746888  | 212176 | 0 | 2 | 0 | 0 | 50 | 54 | 20822796 | 6.21E-01 | 1 |
| ZSCAN4  | 532349  | 849  | -37 | 1108940 | 290140 | 0 | 3 | 1 | 0 | 50 | 57 | 17028192 | 6.21E-01 | 1 |
| GAP43   | 43284   | 622  | -2  | 720188  | 203632 | 0 | 2 | 1 | 0 | 50 | 54 | 20390256 | 6.21E-01 | 1 |

|          |         |      |     |         |         |   |    |   |   |    |     |          |          |   |
|----------|---------|------|-----|---------|---------|---|----|---|---|----|-----|----------|----------|---|
| PUS10    | 635242  | 350  | 33  | 1417592 | 353152  | 0 | 5  | 1 | 0 | 50 | 78  | 28107624 | 6.21E-01 | 1 |
| GGTLC1   | 159782  | 930  | -48 | 576008  | 169456  | 0 | 3  | 1 | 0 | 9  | 6   | 1765404  | 6.21E-01 | 1 |
| SVEP1    | 211688  | 369  | 1   | 9174120 | 2471352 | 0 | 19 | 5 | 0 | 41 | 46  | 23222592 | 6.21E-01 | 1 |
| NIPBL    | 341972  | 479  | 11  | 7333244 | 1896412 | 0 | 14 | 4 | 0 | 10 | 11  | 5774676  | 6.21E-01 | 1 |
| CCT2     | 484023  | 382  | 5   | 1397656 | 385904  | 0 | 4  | 0 | 0 | 12 | 8   | 4239248  | 6.21E-01 | 1 |
| INSM1    | 226483  | 808  | -9  | 1201856 | 435388  | 0 | 2  | 0 | 0 | 7  | 4   | 3870788  | 6.21E-01 | 1 |
| HDX      | 20850   | NaN  | -20 | 1780356 | 469920  | 0 | 5  | 0 | 0 | 10 | 12  | 5059828  | 6.22E-01 | 1 |
| PSMA3    | 290719  | 552  | 26  | 695624  | 169456  | 0 | 2  | 0 | 0 | 50 | 62  | 21857688 | 6.22E-01 | 1 |
| NR1D2    | 395355  | 211  | 2   | 1513356 | 374868  | 0 | 5  | 0 | 0 | 50 | 59  | 21121836 | 6.22E-01 | 1 |
| TIMM17B  | 834040  | NaN  | 38  | 573872  | 170524  | 0 | 1  | 0 | 0 | 50 | 43  | 14994364 | 6.22E-01 | 1 |
| CASC5    | 958415  | 139  | 47  | 6111096 | 1506948 | 0 | 23 | 3 | 0 | 43 | 52  | 21170608 | 6.22E-01 | 1 |
| ACOT7    | 643590  | 176  | 26  | 1183344 | 344964  | 0 | 3  | 0 | 0 | 6  | 3   | 2497340  | 6.22E-01 | 1 |
| DSTYK    | 715889  | 277  | 39  | 2363484 | 669636  | 0 | 7  | 2 | 0 | 50 | 68  | 23980516 | 6.22E-01 | 1 |
| RIMS4    | 942798  | 168  | 40  | 682096  | 204344  | 0 | 2  | 0 | 0 | 50 | 73  | 23693224 | 6.22E-01 | 1 |
| DUOXA2   | 667418  | 544  | 27  | 975440  | 290140  | 0 | 3  | 0 | 0 | 50 | 85  | 27585372 | 6.22E-01 | 1 |
| RTAP19-  | 14979   | 1035 | -68 | 179068  | 53756   | 0 | 3  | 2 | 0 | 6  | 5   | 494840   | 6.22E-01 | 1 |
| PYGM     | 2261775 | 230  | 61  | 2179432 | 602708  | 0 | 8  | 3 | 0 | 50 | 77  | 23145696 | 6.23E-01 | 1 |
| KIAA0513 | 517155  | 273  | 32  | 1088648 | 278392  | 0 | 4  | 2 | 0 | 50 | 59  | 18983344 | 6.23E-01 | 1 |
| TM9SF3   | 790373  | 642  | 24  | 1552160 | 398008  | 0 | 6  | 2 | 0 | 50 | 74  | 24523060 | 6.23E-01 | 1 |
| ZNF528   | 548808  | 989  | -53 | 1633328 | 399076  | 0 | 4  | 1 | 0 | 32 | 30  | 11866192 | 6.23E-01 | 1 |
| SPATA9   | 305999  | 216  | 35  | 657176  | 176932  | 0 | 2  | 1 | 0 | 50 | 49  | 17197648 | 6.23E-01 | 1 |
| TDO2     | 44515   | 745  | -2  | 1089716 | 263440  | 0 | 3  | 1 | 0 | 12 | 13  | 5449648  | 6.23E-01 | 1 |
| EDN3     | 831202  | 402  | -9  | 645428  | 183340  | 0 | 2  | 2 | 0 | 13 | 14  | 4879336  | 6.23E-01 | 1 |
| C4orf50  | 109875  | 686  | 16  | 700252  | 215024  | 0 | 3  | 2 | 0 | 41 | 51  | 13854096 | 6.23E-01 | 1 |
| AKIRIN1  | 681587  | 318  | 30  | 496620  | 138840  | 0 | 1  | 0 | 0 | 50 | 44  | 22595320 | 6.23E-01 | 1 |
| SLU7     | 197504  | 619  | 30  | 1583844 | 360984  | 0 | 9  | 2 | 0 | 10 | 11  | 3393392  | 6.23E-01 | 1 |
| GDF5     | 1521661 | 167  | 53  | 1216808 | 395872  | 0 | 4  | 1 | 0 | 26 | 29  | 11106844 | 6.24E-01 | 1 |
| ASEH2C   | 4131934 | 202  | 53  | 410824  | 130652  | 0 | 1  | 0 | 0 | 27 | 30  | 12483852 | 6.24E-01 | 1 |
| COBL     | 133439  | 509  | -22 | 3132088 | 962624  | 0 | 10 | 6 | 0 | 50 | 108 | 26967000 | 6.24E-01 | 1 |
| HIST1H3A | 408919  | 685  | 43  | 331436  | 109648  | 0 | 1  | 0 | 0 | 50 | 57  | 16881520 | 6.24E-01 | 1 |
| DPYD     | 64696   | 807  | -6  | 2681392 | 743684  | 0 | 11 | 5 | 0 | 41 | 55  | 17108292 | 6.24E-01 | 1 |
| AKAP10   | 545359  | 348  | -11 | 1733364 | 450696  | 0 | 4  | 1 | 0 | 50 | 57  | 21314788 | 6.24E-01 | 1 |
| CBY1     | 1056349 | 262  | 45  | 332860  | 91136   | 0 | 1  | 1 | 0 | 31 | 51  | 16710284 | 6.24E-01 | 1 |

|         |         |      |     |         |         |   |    |   |   |    |    |          |          |   |
|---------|---------|------|-----|---------|---------|---|----|---|---|----|----|----------|----------|---|
| COQ2    | 344601  | 218  | 40  | 1042368 | 335352  | 0 | 1  | 0 | 0 | 50 | 50 | 18924960 | 6.24E-01 | 1 |
| MRPS5   | 172221  | 647  | 11  | 1130656 | 297260  | 0 | 2  | 0 | 0 | 50 | 64 | 20536928 | 6.24E-01 | 1 |
| LYZ     | 675242  | 361  | 13  | 389108  | 103240  | 0 | 1  | 0 | 0 | 50 | 46 | 17692132 | 6.24E-01 | 1 |
| RND3    | 53679   | 438  | 5   | 641512  | 164828  | 0 | 1  | 0 | 0 | 50 | 38 | 18241796 | 6.24E-01 | 1 |
| PROX2   | 884998  | 232  | 41  | 1473484 | 439304  | 0 | 2  | 1 | 0 | 50 | 64 | 26283480 | 6.24E-01 | 1 |
| TSC22D1 | 205312  | 350  | 38  | 2713788 | 871488  | 0 | 8  | 2 | 0 | 17 | 20 | 7247804  | 6.24E-01 | 1 |
| CALHM2  | 542721  | 170  | 51  | 788896  | 253472  | 0 | 3  | 2 | 0 | 4  | 7  | 1946964  | 6.24E-01 | 1 |
| CLMN    | 207561  | 612  | 30  | 2573168 | 691708  | 0 | 11 | 3 | 0 | 13 | 12 | 4060180  | 6.25E-01 | 1 |
| ATR     | 564756  | 403  | 24  | 6874360 | 1796732 | 0 | 25 | 3 | 0 | 14 | 13 | 6044524  | 6.25E-01 | 1 |
| L3MBTL4 | 236747  | 877  | 7   | 1664656 | 411536  | 0 | 4  | 2 | 0 | 50 | 61 | 20322260 | 6.25E-01 | 1 |
| FBXO45  | 1149194 | 156  | 30  | 708084  | 220008  | 0 | 1  | 0 | 0 | 50 | 74 | 19186976 | 6.25E-01 | 1 |
| SIGLEC8 | 393294  | 583  | 17  | 1238168 | 391600  | 0 | 5  | 2 | 0 | 13 | 19 | 6561080  | 6.25E-01 | 1 |
| DCBLD1  | 189294  | 465  | 9   | 1536496 | 413672  | 0 | 3  | 1 | 0 | 50 | 65 | 22672572 | 6.25E-01 | 1 |
| ATP1B2  | 2069567 | 213  | 34  | 769316  | 188680  | 0 | 4  | 1 | 0 | 29 | 47 | 10244968 | 6.25E-01 | 1 |
| NDUFB6  | 474275  | 362  | -7  | 341404  | 84728   | 0 | 1  | 0 | 0 | 50 | 60 | 19977652 | 6.25E-01 | 1 |
| WDR55   | 774470  | 356  | 31  | 972592  | 283376  | 0 | 3  | 2 | 0 | 50 | 59 | 20786128 | 6.25E-01 | 1 |
| GPX3    | 923608  | 382  | 22  | 579212  | 165184  | 0 | 2  | 1 | 0 | 50 | 82 | 23494220 | 6.25E-01 | 1 |
| CLDN15  | 1022626 | 258  | 39  | 572804  | 178000  | 0 | 2  | 0 | 0 | 50 | 67 | 19705312 | 6.25E-01 | 1 |
| MYH4    | 77401   | 731  | -50 | 5098276 | 1281956 | 0 | 17 | 5 | 0 | 13 | 33 | 9377040  | 6.25E-01 | 1 |
| ARL13B  | 85478   | 1310 | -13 | 1134216 | 283020  | 0 | 3  | 0 | 0 | 50 | 61 | 24243244 | 6.25E-01 | 1 |
| CNOT4   | 579978  | 407  | 19  | 1721972 | 481312  | 0 | 5  | 1 | 0 | 50 | 55 | 22011124 | 6.25E-01 | 1 |
| CEP135  | 585468  | 376  | 18  | 3021728 | 740836  | 0 | 6  | 1 | 0 | 15 | 16 | 6257768  | 6.25E-01 | 1 |
| ALB     | 315782  | 613  | 8   | 1613748 | 402636  | 0 | 7  | 2 | 0 | 50 | 74 | 22650500 | 6.25E-01 | 1 |
| BIN2    | 499804  | 194  | 37  | 1462092 | 404772  | 0 | 3  | 3 | 0 | 9  | 8  | 3043088  | 6.25E-01 | 1 |
| HYAL2   | 843769  | 206  | 51  | 1168748 | 362764  | 0 | 4  | 0 | 0 | 35 | 37 | 12054872 | 6.25E-01 | 1 |
| RBM43   | 215149  | 617  | 17  | 912428  | 247420  | 0 | 4  | 1 | 0 | 18 | 13 | 4237112  | 6.26E-01 | 1 |
| LPPR2   | 1385739 | 197  | 31  | 1118552 | 367036  | 0 | 2  | 1 | 0 | 50 | 60 | 22230420 | 6.26E-01 | 1 |
| COMMD5  | 1454261 | 384  | 20  | 543968  | 181204  | 0 | 2  | 0 | 0 | 50 | 96 | 23337580 | 6.26E-01 | 1 |
| SULF2   | 266328  | 588  | 41  | 2287656 | 588468  | 0 | 8  | 3 | 0 | 14 | 12 | 3821660  | 6.26E-01 | 1 |
| TIGD7   | 1397628 | 303  | 32  | 1401928 | 360272  | 0 | 8  | 2 | 0 | 50 | 92 | 23311236 | 6.26E-01 | 1 |
| AANAT   | 1202221 | 197  | 29  | 625136  | 198292  | 0 | 2  | 0 | 0 | 50 | 70 | 20748392 | 6.26E-01 | 1 |
| MYBL2   | 382727  | 276  | 24  | 1789256 | 512284  | 0 | 6  | 1 | 0 | 50 | 81 | 26257136 | 6.26E-01 | 1 |
| COPA    | 939853  | 358  | 27  | 3216104 | 874336  | 0 | 11 | 5 | 0 | 43 | 56 | 16809964 | 6.26E-01 | 1 |



|          |         |      |     |         |         |   |    |   |   |    |     |          |          |   |
|----------|---------|------|-----|---------|---------|---|----|---|---|----|-----|----------|----------|---|
| ARHGEF15 | 824719  | 186  | 40  | 2008196 | 628696  | 0 | 5  | 4 | 0 | 50 | 48  | 17520896 | 6.26E-01 | 1 |
| OR2Z1    | 536422  | 487  | -47 | 758992  | 249200  | 0 | 3  | 1 | 0 | 50 | 119 | 30937112 | 6.26E-01 | 1 |
| APOOL    | 83775   | NaN  | -12 | 705592  | 192596  | 0 | 1  | 0 | 0 | 50 | 73  | 23486744 | 6.26E-01 | 1 |
| KIF1A    | 1094176 | 446  | 29  | 4373104 | 1241372 | 0 | 12 | 4 | 0 | 21 | 31  | 10772916 | 6.26E-01 | 1 |
| ARHGAP21 | 385975  | 470  | 20  | 1710580 | 445712  | 0 | 5  | 3 | 0 | 50 | 70  | 28571136 | 6.27E-01 | 1 |
| SGCE     | 393749  | 462  | 4   | 1276616 | 331792  | 0 | 2  | 1 | 0 | 50 | 52  | 19426208 | 6.27E-01 | 1 |
| PPP2R3C  | 640994  | 321  | 45  | 1222860 | 283020  | 0 | 5  | 0 | 0 | 18 | 20  | 7609144  | 6.27E-01 | 1 |
| CNIH4    | 628752  | 256  | 18  | 377716  | 90068   | 0 | 1  | 0 | 0 | 50 | 58  | 19280604 | 6.27E-01 | 1 |
| PSMG1    | 383292  | 235  | 30  | 750804  | 200784  | 0 | 2  | 0 | 0 | 50 | 68  | 25776536 | 6.27E-01 | 1 |
| CDCA3    | 2822601 | 232  | 32  | 674264  | 208972  | 0 | 2  | 1 | 0 | 50 | 62  | 20662240 | 6.27E-01 | 1 |
| NOS3     | 698665  | 373  | 33  | 3258468 | 1009260 | 0 | 12 | 5 | 0 | 7  | 19  | 5376312  | 6.27E-01 | 1 |
| TRIP12   | 321955  | 722  | 21  | 5150964 | 1405488 | 0 | 13 | 4 | 0 | 29 | 49  | 18048132 | 6.27E-01 | 1 |
| C11orf65 | 405487  | 579  | 12  | 846568  | 195800  | 0 | 3  | 1 | 0 | 50 | 67  | 19690004 | 6.27E-01 | 1 |
| TFEC     | 236823  | 538  | -14 | 905308  | 239588  | 0 | 3  | 1 | 0 | 50 | 57  | 18201568 | 6.27E-01 | 1 |
| NUP188   | 1517799 | 203  | 29  | 4503044 | 1289788 | 0 | 21 | 7 | 0 | 12 | 17  | 5050928  | 6.27E-01 | 1 |
| XBP1     | 571394  | 219  | -10 | 1021364 | 233536  | 0 | 2  | 0 | 0 | 50 | 80  | 22835976 | 6.27E-01 | 1 |
| KCNJ16   | 32643   | 589  | -53 | 1055896 | 290852  | 0 | 7  | 3 | 0 | 2  | 3   | 875760   | 6.27E-01 | 1 |
| ABCG2    | 432576  | 209  | -7  | 1702036 | 463868  | 0 | 8  | 0 | 0 | 4  | 11  | 3271996  | 6.27E-01 | 1 |
| SLC13A4  | 471922  | 312  | 2   | 1603068 | 469920  | 0 | 4  | 0 | 0 | 26 | 34  | 12846260 | 6.27E-01 | 1 |
| ALG5     | 176745  | 650  | 16  | 851196  | 230688  | 0 | 2  | 1 | 0 | 50 | 55  | 19294132 | 6.27E-01 | 1 |
| BRDT     | 311662  | 242  | 9   | 2507664 | 606624  | 0 | 9  | 1 | 0 | 50 | 50  | 19831692 | 6.28E-01 | 1 |
| TMED2    | 987941  | 424  | 47  | 520828  | 139196  | 0 | 1  | 0 | 0 | 50 | 77  | 26168848 | 6.28E-01 | 1 |
| BICC1    | 156609  | 497  | -22 | 2506952 | 702388  | 0 | 8  | 1 | 0 | 13 | 17  | 6362076  | 6.28E-01 | 1 |
| ATG3     | 302697  | 636  | 41  | 851552  | 204700  | 0 | 3  | 0 | 0 | 13 | 13  | 3413684  | 6.28E-01 | 1 |
| UBASH3B  | 660955  | 261  | 6   | 1679252 | 458884  | 0 | 6  | 2 | 0 | 50 | 83  | 28996556 | 6.28E-01 | 1 |
| PPM1F    | 471638  | 379  | 52  | 1139912 | 347812  | 0 | 4  | 0 | 0 | 30 | 39  | 14874748 | 6.28E-01 | 1 |
| KIR3DL1  | 987531  | 620  | -23 | 1141336 | 320756  | 0 | 6  | 0 | 0 | 22 | 41  | 9340728  | 6.28E-01 | 1 |
| OR5AS1   | 4262    | 1044 | -40 | 804560  | 234604  | 0 | 6  | 3 | 0 | 5  | 12  | 1863660  | 6.28E-01 | 1 |
| GTF2F1   | 943949  | 407  | 31  | 1367396 | 343540  | 0 | 4  | 2 | 0 | 50 | 47  | 18083732 | 6.28E-01 | 1 |
| ERCC6    | NaN     | NaN  | NaN | 3834120 | 1038096 | 0 | 11 | 2 | 0 | 50 | 118 | 40683680 | 6.28E-01 | 1 |
| COBLL1   | 76781   | 413  | -4  | 2975092 | 819512  | 0 | 9  | 1 | 0 | 50 | 53  | 20309444 | 6.28E-01 | 1 |
| SDS      | 444479  | 276  | 36  | 829124  | 254896  | 0 | 2  | 2 | 0 | 18 | 16  | 7704552  | 6.28E-01 | 1 |
| UTP14A   | 379883  | NaN  | 35  | 2001076 | 534356  | 0 | 8  | 3 | 0 | 11 | 12  | 4377376  | 6.28E-01 | 1 |

|          |         |      |     |         |         |   |    |   |   |    |     |          |          |   |
|----------|---------|------|-----|---------|---------|---|----|---|---|----|-----|----------|----------|---|
| IQCK     | 289773  | 639  | 13  | 762196  | 194732  | 0 | 2  | 0 | 0 | 50 | 74  | 27480708 | 6.28E-01 | 1 |
| PRODH2   | 1105613 | 321  | 38  | 1334288 | 433252  | 0 | 4  | 1 | 0 | 50 | 70  | 19299472 | 6.28E-01 | 1 |
| CHPF     | 548994  | 487  | 35  | 1839808 | 659312  | 0 | 6  | 2 | 0 | 50 | 86  | 24911100 | 6.28E-01 | 1 |
| MAN2B2   | 501896  | 278  | 33  | 2545400 | 769672  | 0 | 9  | 4 | 0 | 50 | 56  | 19768680 | 6.28E-01 | 1 |
| CSTL1    | 188567  | 750  | -16 | 381632  | 96832   | 0 | 1  | 0 | 0 | 50 | 74  | 22064524 | 6.28E-01 | 1 |
| HCST     | 1060028 | 321  | 47  | 235672  | 78320   | 0 | 1  | 1 | 0 | 6  | 12  | 3110728  | 6.28E-01 | 1 |
| MRAP     | 436753  | 379  | 8   | 526168  | 153080  | 0 | 1  | 0 | 0 | 50 | 69  | 24300916 | 6.28E-01 | 1 |
| RALB     | 221264  | 444  | 37  | 542900  | 137416  | 0 | 1  | 0 | 0 | 50 | 64  | 22775100 | 6.28E-01 | 1 |
| CC2D1B   | 815523  | 448  | 26  | 2200080 | 650412  | 0 | 8  | 1 | 0 | 39 | 49  | 18550448 | 6.28E-01 | 1 |
| ADAMTS1  | 373086  | 875  | 7   | 4108240 | 1102532 | 0 | 22 | 9 | 0 | 23 | 34  | 8683908  | 6.28E-01 | 1 |
| SRP19    | 242849  | 340  | 34  | 386972  | 96832   | 0 | 1  | 0 | 0 | 50 | 48  | 18096548 | 6.29E-01 | 1 |
| CACNB3   | 1655612 | 214  | 57  | 1252052 | 353152  | 0 | 3  | 1 | 0 | 50 | 64  | 19943476 | 6.29E-01 | 1 |
| ACSM4    | 1157790 | 439  | 27  | 1504456 | 408332  | 0 | 4  | 2 | 0 | 50 | 66  | 20642304 | 6.29E-01 | 1 |
| ZNF114   | 1052191 | 391  | 32  | 1081172 | 270916  | 0 | 4  | 0 | 0 | 41 | 37  | 11983316 | 6.29E-01 | 1 |
| C19orf52 | 2009333 | 193  | 41  | 629408  | 213244  | 0 | 2  | 1 | 0 | 50 | 71  | 21822800 | 6.29E-01 | 1 |
| EBP      | 726793  | NaN  | 2   | 585264  | 171948  | 0 | 2  | 0 | 0 | 50 | 78  | 22575384 | 6.29E-01 | 1 |
| ATPAF2   | 886959  | 193  | 17  | 747244  | 211820  | 0 | 2  | 0 | 0 | 50 | 52  | 20036748 | 6.29E-01 | 1 |
| RSF1     | 577731  | 354  | 33  | 3741560 | 942688  | 0 | 14 | 1 | 0 | 32 | 47  | 18090496 | 6.29E-01 | 1 |
| ZNF680   | 199707  | 1110 | -18 | 1495912 | 347456  | 0 | 4  | 0 | 0 | 32 | 31  | 15179840 | 6.29E-01 | 1 |
| XAGE2    | NaN     | NaN  | NaN | 583840  | 143468  | 0 | 3  | 2 | 0 | 8  | 18  | 4069436  | 6.29E-01 | 1 |
| TMEM130  | 1040178 | 526  | 34  | 1102888 | 323960  | 0 | 5  | 1 | 0 | 50 | 72  | 20241448 | 6.29E-01 | 1 |
| NDUFS7   | 2285841 | 209  | 31  | 557496  | 162336  | 0 | 1  | 0 | 0 | 50 | 60  | 22146760 | 6.29E-01 | 1 |
| PHLDA3   | 842013  | 209  | 26  | 309720  | 104664  | 0 | 6  | 2 | 0 | 1  | 2   | 239588   | 6.29E-01 | 1 |
| ITFG3    | 1304158 | 199  | 40  | 1395876 | 422928  | 0 | 6  | 2 | 0 | 50 | 80  | 23363924 | 6.29E-01 | 1 |
| FAM167B  | 1427362 | 210  | 43  | 396584  | 133144  | 0 | 1  | 0 | 0 | 50 | 69  | 25771552 | 6.29E-01 | 1 |
| APOE     | 1003719 | 196  | 6   | 782844  | 248844  | 0 | 2  | 0 | 0 | 50 | 42  | 17116124 | 6.29E-01 | 1 |
| OR4D10   | 430021  | 507  | -1  | 757924  | 241724  | 0 | 2  | 1 | 0 | 50 | 65  | 21241096 | 6.30E-01 | 1 |
| SLC2A3   | 122883  | 305  | 13  | 1253476 | 377360  | 0 | 6  | 4 | 0 | 19 | 28  | 7056988  | 6.30E-01 | 1 |
| B2M      | 673122  | 428  | 36  | 315416  | 84016   | 0 | 2  | 1 | 0 | 5  | 10  | 1894632  | 6.30E-01 | 1 |
| CCDC101  | NaN     | NaN  | NaN | 765756  | 216804  | 0 | 2  | 0 | 0 | 50 | 116 | 39862388 | 6.30E-01 | 1 |
| DHX36    | 94558   | 921  | -11 | 2665372 | 672128  | 0 | 8  | 0 | 0 | 6  | 7   | 3588836  | 6.30E-01 | 1 |
| HIST1H2B | 227588  | 622  | 29  | 315416  | 95764   | 0 | 2  | 1 | 0 | 14 | 21  | 3578512  | 6.30E-01 | 1 |
| GSDMD    | 2183482 | 235  | 37  | 1219300 | 377360  | 0 | 3  | 0 | 0 | 50 | 40  | 19636960 | 6.30E-01 | 1 |

|          |         |      |     |         |        |   |    |   |   |    |     |          |          |   |
|----------|---------|------|-----|---------|--------|---|----|---|---|----|-----|----------|----------|---|
| ATP1A4   | 841605  | 386  | 29  | 2641164 | 748668 | 0 | 8  | 4 | 0 | 46 | 48  | 17341116 | 6.30E-01 | 1 |
| NR1D1    | 1573630 | 202  | 28  | 1718768 | 457816 | 0 | 3  | 0 | 0 | 19 | 18  | 8498788  | 6.30E-01 | 1 |
| GLYAT    | 285823  | 620  | 9   | 781064  | 194020 | 0 | 3  | 1 | 0 | 50 | 55  | 20943480 | 6.30E-01 | 1 |
| NDE1     | 495419  | 283  | 26  | 994308  | 257388 | 0 | 9  | 0 | 0 | 2  | 0   | 378072   | 6.30E-01 | 1 |
| RTAP10-  | 867542  | 461  | 28  | 673908  | 201852 | 0 | 2  | 0 | 0 | 50 | 64  | 21746972 | 6.30E-01 | 1 |
| TMEM18   | 144358  | 557  | -14 | 377716  | 93272  | 0 | 1  | 0 | 0 | 50 | 63  | 23811060 | 6.30E-01 | 1 |
| IPHOSPH1 | 355097  | 470  | 40  | 1813820 | 416164 | 0 | 6  | 0 | 0 | 29 | 47  | 12822052 | 6.30E-01 | 1 |
| MED8     | 1088321 | 252  | 27  | 782844  | 218940 | 0 | 2  | 0 | 0 | 50 | 56  | 22185208 | 6.31E-01 | 1 |
| TRIM16L  | 752804  | 391  | -6  | 901392  | 233892 | 0 | 3  | 0 | 0 | 50 | 50  | 17232180 | 6.31E-01 | 1 |
| HOXC11   | 1257445 | 274  | 23  | 750092  | 231400 | 0 | 2  | 0 | 0 | 50 | 62  | 22406640 | 6.31E-01 | 1 |
| OR52J3   | 97256   | 1024 | -11 | 753652  | 236384 | 0 | 2  | 0 | 0 | 50 | 75  | 25324772 | 6.31E-01 | 1 |
| GNPTAB   | 345225  | 190  | 14  | 3272352 | 840516 | 0 | 6  | 3 | 0 | 50 | 44  | 19957716 | 6.31E-01 | 1 |
| HIRA     | 611613  | 300  | 1   | 2608056 | 756144 | 0 | 6  | 3 | 0 | 50 | 73  | 23945272 | 6.31E-01 | 1 |
| TMEM45A  | 346650  | 411  | 7   | 714848  | 190816 | 0 | 2  | 1 | 0 | 50 | 51  | 17913920 | 6.31E-01 | 1 |
| DENND2C  | 626568  | 394  | 8   | 2274128 | 588112 | 0 | 6  | 2 | 0 | 50 | 53  | 19309440 | 6.31E-01 | 1 |
| CDK14    | 127937  | 1027 | 7   | 1187972 | 315772 | 0 | 4  | 0 | 0 | 50 | 65  | 23228288 | 6.31E-01 | 1 |
| SPCS3    | 128128  | 550  | 11  | 464936  | 132076 | 0 | 1  | 1 | 0 | 33 | 43  | 15998284 | 6.31E-01 | 1 |
| PTF1A    | 124603  | 469  | 1   | 787828  | 270560 | 0 | 2  | 0 | 0 | 50 | 53  | 19494916 | 6.31E-01 | 1 |
| ZBTB37   | 443726  | 385  | 13  | 1316132 | 381988 | 0 | 4  | 0 | 0 | 8  | 5   | 2938424  | 6.31E-01 | 1 |
| ISLR2    | 492755  | 317  | 46  | 1771456 | 623000 | 0 | 5  | 1 | 0 | 50 | 52  | 22095852 | 6.31E-01 | 1 |
| TXNL4B   | 414449  | 479  | 9   | 394448  | 98968  | 0 | 1  | 0 | 0 | 50 | 53  | 20136784 | 6.31E-01 | 1 |
| LHPP     | 305373  | 430  | 22  | 690284  | 205768 | 0 | 2  | 1 | 0 | 50 | 60  | 21135720 | 6.31E-01 | 1 |
| TMED8    | 551151  | 418  | 50  | 830192  | 234604 | 0 | 2  | 1 | 0 | 50 | 92  | 24426584 | 6.31E-01 | 1 |
| SPAG5    | 1651143 | 225  | 31  | 3074416 | 851552 | 0 | 11 | 0 | 0 | 1  | 1   | 1128876  | 6.31E-01 | 1 |
| KORC1L   | 404213  | 365  | 30  | 439304  | 138484 | 0 | 2  | 2 | 0 | 5  | 4   | 1395164  | 6.32E-01 | 1 |
| OR6C68   | 802038  | 706  | 3   | 791744  | 224992 | 0 | 1  | 0 | 0 | 50 | 71  | 20539776 | 6.32E-01 | 1 |
| PRKCZ    | 1013925 | 293  | 28  | 1574232 | 398364 | 0 | 3  | 0 | 0 | 31 | 38  | 15125728 | 6.32E-01 | 1 |
| C17orf67 | 306329  | 420  | -58 | 303668  | 79744  | 0 | 1  | 0 | 0 | 50 | 115 | 29933548 | 6.32E-01 | 1 |
| C16orf87 | 469144  | 217  | 12  | 410468  | 101104 | 0 | 3  | 1 | 0 | 10 | 22  | 4155588  | 6.32E-01 | 1 |
| ABL2     | 328468  | 301  | 6   | 3089368 | 917768 | 0 | 7  | 1 | 0 | 1  | 1   | 1499828  | 6.32E-01 | 1 |
| ABI3     | 816202  | 346  | 24  | 907444  | 298328 | 0 | 2  | 1 | 0 | 50 | 56  | 24378524 | 6.32E-01 | 1 |
| RBBP9    | 414549  | 436  | 23  | 493772  | 124600 | 0 | 1  | 0 | 0 | 50 | 57  | 25166708 | 6.32E-01 | 1 |
| CA5B     | 170565  | NaN  | 42  | 825920  | 222856 | 0 | 3  | 0 | 0 | 50 | 71  | 21993680 | 6.32E-01 | 1 |

|          |         |     |     |         |         |   |    |   |   |    |     |          |          |   |
|----------|---------|-----|-----|---------|---------|---|----|---|---|----|-----|----------|----------|---|
| AQP11    | 603969  | 401 | 30  | 671416  | 208616  | 0 | 3  | 2 | 0 | 13 | 10  | 3550388  | 6.32E-01 | 1 |
| MAGEB1   | 74310   | NaN | 16  | 867928  | 251336  | 0 | 3  | 1 | 0 | 50 | 67  | 20445436 | 6.32E-01 | 1 |
| KCNA7    | 2070141 | 200 | 35  | 1087580 | 380920  | 0 | 3  | 0 | 0 | 24 | 30  | 8450372  | 6.33E-01 | 1 |
| GPR119   | 301748  | NaN | 37  | 815596  | 265220  | 0 | 3  | 0 | 0 | 50 | 61  | 18917128 | 6.33E-01 | 1 |
| PDP2     | 942986  | 142 | 34  | 1315064 | 387328  | 0 | 3  | 1 | 0 | 50 | 65  | 21541916 | 6.33E-01 | 1 |
| ZNF777   | 588536  | 467 | 17  | 2082600 | 604488  | 0 | 9  | 2 | 0 | 50 | 68  | 19904316 | 6.33E-01 | 1 |
| IQCD     | 417427  | 252 | 35  | 883948  | 239588  | 0 | 2  | 0 | 0 | 50 | 52  | 19240376 | 6.33E-01 | 1 |
| MAT2A    | 1241734 | 170 | 39  | 1018872 | 284088  | 0 | 4  | 0 | 0 | 33 | 39  | 13452884 | 6.33E-01 | 1 |
| NETO2    | 542002  | 532 | 7   | 1367752 | 351728  | 0 | 5  | 1 | 0 | 50 | 71  | 21375308 | 6.33E-01 | 1 |
| ZNF594   | 1391000 | 384 | 20  | 2102180 | 490924  | 0 | 11 | 3 | 0 | 50 | 83  | 22837756 | 6.33E-01 | 1 |
| PARP16   | 762474  | 223 | 53  | 824852  | 234604  | 0 | 1  | 2 | 0 | 21 | 29  | 9522644  | 6.33E-01 | 1 |
| SEC14L1  | 777991  | 192 | 20  | 1871136 | 506232  | 0 | 7  | 1 | 0 | 50 | 58  | 22457548 | 6.33E-01 | 1 |
| MED20    | 429349  | 341 | 34  | 544680  | 150588  | 0 | 1  | 0 | 0 | 50 | 42  | 17067708 | 6.33E-01 | 1 |
| SLC25A2  | 800016  | 708 | -15 | 742616  | 224992  | 0 | 6  | 1 | 0 | 50 | 156 | 25349336 | 6.33E-01 | 1 |
| FLT3     | 346092  | 614 | 42  | 2627992 | 657176  | 0 | 8  | 3 | 0 | 50 | 57  | 19179500 | 6.33E-01 | 1 |
| ESR1     | 221347  | 568 | 0   | 1515136 | 428624  | 0 | 4  | 2 | 0 | 36 | 28  | 11382032 | 6.33E-01 | 1 |
| ACTR8    | 128709  | 552 | 39  | 1620512 | 435388  | 0 | 6  | 2 | 0 | 50 | 59  | 17062012 | 6.33E-01 | 1 |
| PLA2G15  | 910198  | 281 | 30  | 1034892 | 311856  | 0 | 2  | 1 | 0 | 50 | 63  | 19207980 | 6.34E-01 | 1 |
| MAPK8IP3 | 1598087 | 288 | 36  | 3459608 | 973660  | 0 | 11 | 3 | 0 | 27 | 27  | 12385240 | 6.34E-01 | 1 |
| PDE8A    | 393930  | 366 | 27  | 2177296 | 571736  | 0 | 4  | 1 | 0 | 50 | 39  | 20168468 | 6.34E-01 | 1 |
| C5       | 628273  | 379 | 37  | 4409060 | 1137064 | 0 | 9  | 0 | 0 | 6  | 5   | 3853344  | 6.34E-01 | 1 |
| ZNF488   | 117080  | 445 | 21  | 816664  | 275900  | 0 | 2  | 1 | 0 | 50 | 54  | 20315496 | 6.34E-01 | 1 |
| ESRP1    | 467699  | 426 | 31  | 1777508 | 496264  | 0 | 6  | 2 | 0 | 50 | 60  | 22214756 | 6.34E-01 | 1 |
| KIAA1715 | 237188  | 967 | 11  | 1120332 | 305448  | 0 | 1  | 0 | 0 | 50 | 48  | 19923540 | 6.34E-01 | 1 |
| CCDC84   | 1457410 | 180 | 55  | 887864  | 223924  | 0 | 2  | 0 | 0 | 19 | 13  | 6716296  | 6.34E-01 | 1 |
| NCF2     | 618153  | 407 | 31  | 1396232 | 356356  | 0 | 4  | 2 | 0 | 29 | 29  | 9311180  | 6.34E-01 | 1 |
| ANKFY1   | 816229  | 357 | 26  | 3082604 | 870064  | 0 | 7  | 0 | 0 | 0  | 0   | 870064   | 6.34E-01 | 1 |
| IVL      | 59999   | 804 | 12  | 1499828 | 381988  | 0 | 3  | 1 | 0 | 50 | 65  | 21559004 | 6.34E-01 | 1 |
| TMEM89   | 1386275 | 212 | 37  | 383412  | 132432  | 0 | 1  | 0 | 0 | 50 | 75  | 27156392 | 6.34E-01 | 1 |
| PTX3     | NaN     | NaN | NaN | 944112  | 288360  | 0 | 4  | 2 | 0 | 50 | 118 | 39933944 | 6.34E-01 | 1 |
| BTBD11   | 206629  | 764 | 16  | 2858324 | 862588  | 0 | 7  | 4 | 0 | 50 | 45  | 18384908 | 6.34E-01 | 1 |
| ULBP3    | 402308  | 382 | 51  | 630120  | 166608  | 0 | 2  | 2 | 0 | 11 | 11  | 2658608  | 6.35E-01 | 1 |
| KLF17    | 865527  | 167 | 38  | 977576  | 284800  | 0 | 3  | 0 | 0 | 50 | 61  | 20286304 | 6.35E-01 | 1 |

|           |         |      |     |         |         |   |    |   |   |    |     |          |          |   |
|-----------|---------|------|-----|---------|---------|---|----|---|---|----|-----|----------|----------|---|
| GDNF      | 176444  | 628  | 4   | 534712  | 152012  | 0 | 4  | 1 | 0 | 2  | 4   | 960132   | 6.35E-01 | 1 |
| CCDC6     | 137718  | 555  | 0   | 1224996 | 331080  | 0 | 3  | 0 | 0 | 50 | 47  | 20113288 | 6.35E-01 | 1 |
| DNTTIP1   | 742720  | 180  | 48  | 873624  | 239232  | 0 | 4  | 2 | 0 | 43 | 45  | 12440420 | 6.35E-01 | 1 |
| IIST1H2A1 | 390169  | 544  | 57  | 312568  | 109292  | 0 | 2  | 2 | 0 | 18 | 19  | 3237820  | 6.35E-01 | 1 |
| KDM3B     | 1254629 | 209  | 42  | 4432200 | 1311504 | 0 | 18 | 2 | 0 | 0  | 2   | 1311504  | 6.35E-01 | 1 |
| FAM114A1  | 370538  | 352  | 63  | 1463516 | 399076  | 0 | 4  | 1 | 0 | 50 | 59  | 20806064 | 6.35E-01 | 1 |
| FCGRT     | 2080142 | 210  | 41  | 912072  | 286224  | 0 | 3  | 2 | 0 | 17 | 20  | 5347832  | 6.35E-01 | 1 |
| MALL      | NaN     | NaN  | NaN | 390888  | 115344  | 0 | 1  | 0 | 0 | 50 | 116 | 39760928 | 6.35E-01 | 1 |
| INTS4     | 577731  | 361  | 32  | 2495560 | 689216  | 0 | 4  | 0 | 0 | 9  | 13  | 5857980  | 6.35E-01 | 1 |
| KRTAP1-1  | 977588  | 404  | 10  | 453544  | 118904  | 0 | 2  | 1 | 0 | 50 | 68  | 14276668 | 6.35E-01 | 1 |
| B3GALT5   | 286705  | 689  | -70 | 783912  | 214668  | 0 | 3  | 1 | 0 | 50 | 117 | 33315904 | 6.35E-01 | 1 |
| FGF6      | 291341  | 908  | 23  | 516200  | 166252  | 0 | 1  | 0 | 0 | 50 | 46  | 20758360 | 6.35E-01 | 1 |
| SPRN      | 485067  | 472  | 8   | 346744  | 144536  | 0 | 1  | 0 | 0 | 50 | 60  | 20562916 | 6.35E-01 | 1 |
| ALOX5     | 127792  | 737  | 36  | 1758996 | 461376  | 0 | 4  | 0 | 0 | 3  | 1   | 1106804  | 6.36E-01 | 1 |
| LRRC66    | 91954   | 815  | 7   | 2218592 | 619084  | 0 | 17 | 4 | 0 | 2  | 9   | 1654332  | 6.36E-01 | 1 |
| ADRB1     | 272214  | 502  | 25  | 1122112 | 411536  | 0 | 3  | 2 | 0 | 38 | 39  | 16048124 | 6.36E-01 | 1 |
| DHRS1     | 915114  | 220  | 38  | 797796  | 242436  | 0 | 1  | 0 | 0 | 50 | 69  | 21077692 | 6.36E-01 | 1 |
| HOXA9     | 473864  | 394  | 13  | 674976  | 206124  | 0 | 2  | 0 | 0 | 50 | 80  | 25624168 | 6.36E-01 | 1 |
| PURG      | 339429  | 549  | -11 | 962980  | 268424  | 0 | 3  | 1 | 0 | 50 | 55  | 19089432 | 6.36E-01 | 1 |
| SMPD1     | 424837  | 471  | 17  | 1580996 | 508012  | 0 | 5  | 2 | 0 | 50 | 55  | 20339348 | 6.36E-01 | 1 |
| TSPAN1    | 908945  | 190  | 29  | 633680  | 171592  | 0 | 2  | 1 | 0 | 50 | 82  | 25648732 | 6.36E-01 | 1 |
| NRARP     | 1724821 | 399  | 43  | 281240  | 87220   | 0 | 1  | 1 | 0 | 50 | 60  | 16636592 | 6.36E-01 | 1 |
| DLG2      | 57955   | 1000 | -20 | 2742624 | 712356  | 0 | 10 | 4 | 0 | 50 | 87  | 22619884 | 6.36E-01 | 1 |
| SORCS3    | 14547   | 986  | -29 | 3138140 | 891424  | 0 | 18 | 5 | 0 | 31 | 58  | 11005384 | 6.37E-01 | 1 |
| MRPL18    | 652619  | 453  | 26  | 458528  | 134212  | 0 | 1  | 0 | 0 | 50 | 49  | 21402008 | 6.37E-01 | 1 |
| TAB1      | 872660  | 250  | 73  | 1354580 | 398008  | 0 | 5  | 1 | 0 | 50 | 50  | 20133936 | 6.37E-01 | 1 |
| TM4SF18   | 529009  | 254  | 8   | 525812  | 144892  | 0 | 2  | 1 | 0 | 17 | 43  | 11386660 | 6.37E-01 | 1 |
| EFNB3     | 2066943 | 232  | 27  | 824496  | 285156  | 0 | 4  | 1 | 0 | 50 | 93  | 23452924 | 6.37E-01 | 1 |
| MAFK      | 595899  | 243  | 38  | 383768  | 127804  | 0 | 1  | 0 | 0 | 50 | 61  | 22104040 | 6.37E-01 | 1 |
| VSIG4     | 317695  | NaN  | 42  | 1023856 | 289784  | 0 | 3  | 2 | 0 | 34 | 33  | 12069824 | 6.37E-01 | 1 |
| EHD1      | 3218288 | 209  | 61  | 1342832 | 388396  | 0 | 4  | 1 | 0 | 50 | 89  | 25050652 | 6.37E-01 | 1 |
| YARS      | 1339617 | 195  | 26  | 1369176 | 377004  | 0 | 4  | 2 | 0 | 50 | 75  | 22599948 | 6.37E-01 | 1 |
| SYT3      | 612522  | 593  | 35  | 1453548 | 478464  | 0 | 5  | 2 | 0 | 50 | 69  | 23489948 | 6.37E-01 | 1 |

|          |         |     |     |          |         |   |    |   |   |    |    |          |          |   |
|----------|---------|-----|-----|----------|---------|---|----|---|---|----|----|----------|----------|---|
| GATS     | 1382416 | 198 | 55  | 413672   | 128872  | 0 | 1  | 0 | 0 | 50 | 42 | 17341828 | 6.37E-01 | 1 |
| SLC6A4   | 558157  | 298 | 25  | 1613748  | 459240  | 0 | 5  | 1 | 0 | 50 | 46 | 19048136 | 6.37E-01 | 1 |
| BCL9L    | 1488276 | 175 | 54  | 3665376  | 1170528 | 0 | 10 | 1 | 0 | 10 | 11 | 4967624  | 6.37E-01 | 1 |
| UBE2D2   | 641116  | 244 | 39  | 399076   | 100748  | 0 | 1  | 0 | 0 | 50 | 81 | 26068456 | 6.37E-01 | 1 |
| GSTM5    | 927739  | 201 | 22  | 592740   | 140976  | 0 | 2  | 1 | 0 | 50 | 50 | 14380264 | 6.37E-01 | 1 |
| LCTL     | 553330  | 219 | 58  | 1488080  | 383056  | 0 | 8  | 2 | 0 | 50 | 70 | 21308024 | 6.37E-01 | 1 |
| ARF4     | 703082  | 422 | 29  | 474548   | 126736  | 0 | 1  | 1 | 0 | 19 | 17 | 7060904  | 6.37E-01 | 1 |
| MORN1    | 644518  | 302 | 30  | 1281600  | 371664  | 0 | 2  | 0 | 0 | 50 | 52 | 21858044 | 6.38E-01 | 1 |
| NAGA     | 1321127 | 363 | 65  | 1066932  | 287292  | 0 | 2  | 1 | 0 | 50 | 55 | 15728436 | 6.38E-01 | 1 |
| RBM42    | 1162794 | 390 | 27  | 1179784  | 401924  | 0 | 5  | 2 | 0 | 50 | 66 | 20625572 | 6.38E-01 | 1 |
| CYTH1    | 986469  | 250 | 32  | 1077256  | 254540  | 0 | 3  | 0 | 0 | 50 | 60 | 22466804 | 6.38E-01 | 1 |
| JAALADL  | 3267059 | 207 | 46  | 1870424  | 578500  | 0 | 6  | 1 | 0 | 34 | 42 | 13459292 | 6.38E-01 | 1 |
| ATHL1    | 1463610 | 437 | 24  | 1845148  | 574940  | 0 | 4  | 1 | 0 | 6  | 2  | 2533652  | 6.38E-01 | 1 |
| C1orf159 | 2134483 | 234 | 21  | 518692   | 153080  | 0 | 2  | 0 | 0 | 50 | 82 | 21419808 | 6.38E-01 | 1 |
| MFSD2A   | 974339  | 387 | 27  | 1387688  | 410824  | 0 | 4  | 0 | 0 | 4  | 8  | 2945900  | 6.38E-01 | 1 |
| BIRC8    | 427680  | 921 | -46 | 603064   | 158420  | 0 | 2  | 0 | 0 | 50 | 59 | 17329368 | 6.39E-01 | 1 |
| DPY19L4  | 449158  | 380 | 32  | 1914924  | 481668  | 0 | 5  | 1 | 0 | 36 | 29 | 13039568 | 6.39E-01 | 1 |
| HYAL4    | 87602   | 443 | -10 | 1223216  | 333928  | 0 | 4  | 0 | 0 | 50 | 64 | 23412340 | 6.39E-01 | 1 |
| PITPNC1  | 648233  | 365 | 3   | 984696   | 247776  | 0 | 2  | 1 | 0 | 50 | 49 | 19163124 | 6.39E-01 | 1 |
| DLD      | 470337  | 486 | 12  | 1320048  | 369528  | 0 | 5  | 2 | 0 | 50 | 55 | 19417664 | 6.39E-01 | 1 |
| HOXD1    | 245316  | 874 | 13  | 789964   | 268424  | 0 | 2  | 0 | 0 | 24 | 30 | 6968700  | 6.39E-01 | 1 |
| PTPMT1   | 1001413 | 219 | 34  | 619084   | 153080  | 0 | 2  | 1 | 0 | 50 | 61 | 18105804 | 6.39E-01 | 1 |
| DNHD1    | 425139  | 491 | 23  | 11789652 | 3622656 | 0 | 10 | 0 | 0 | 0  | 0  | 3622656  | 6.39E-01 | 1 |
| PLIN1    | 880974  | 190 | 35  | 1292992  | 416876  | 0 | 1  | 0 | 0 | 13 | 10 | 5919212  | 6.39E-01 | 1 |
| ALGAPA   | 258743  | 457 | 12  | 5426508  | 1432188 | 0 | 11 | 2 | 0 | 15 | 12 | 6870444  | 6.40E-01 | 1 |
| MPHOSPH  | 1064138 | 201 | 37  | 2684240  | 703456  | 0 | 12 | 0 | 0 | 4  | 3  | 1841232  | 6.40E-01 | 1 |
| ADH7     | 332944  | 854 | 12  | 1065508  | 296192  | 0 | 4  | 0 | 0 | 50 | 57 | 17161692 | 6.40E-01 | 1 |
| CKM      | 1280459 | 215 | 23  | 988256   | 265576  | 0 | 6  | 3 | 0 | 5  | 13 | 2335360  | 6.40E-01 | 1 |
| CDK19    | 322538  | 480 | 29  | 1326456  | 338556  | 0 | 2  | 1 | 0 | 40 | 43 | 16563256 | 6.40E-01 | 1 |
| HOXB2    | 946208  | 524 | 29  | 859384   | 288716  | 0 | 3  | 1 | 0 | 50 | 60 | 17564684 | 6.40E-01 | 1 |
| GRWD1    | 1418188 | 209 | 41  | 1120332  | 337488  | 0 | 2  | 2 | 0 | 31 | 58 | 18583556 | 6.40E-01 | 1 |
| DOK5     | 139298  | 847 | -37 | 805628   | 207904  | 0 | 3  | 0 | 0 | 50 | 63 | 20079112 | 6.40E-01 | 1 |
| POMT1    | 651666  | 272 | 34  | 1934504  | 543256  | 0 | 1  | 0 | 0 | 4  | 0  | 3784280  | 6.40E-01 | 1 |

|          |         |      |     |         |         |   |    |   |   |    |     |          |          |   |
|----------|---------|------|-----|---------|---------|---|----|---|---|----|-----|----------|----------|---|
| RTN4RL2  | 923775  | 197  | 9   | 997868  | 358492  | 0 | 3  | 2 | 0 | 50 | 53  | 18462160 | 6.40E-01 | 1 |
| ESYT1    | 2878044 | 171  | 40  | 2844796 | 855824  | 0 | 8  | 4 | 0 | 42 | 54  | 17538340 | 6.40E-01 | 1 |
| KIAA1210 | 556208  | NaN  | 8   | 4316500 | 1217876 | 0 | 12 | 3 | 0 | 4  | 8   | 3768260  | 6.40E-01 | 1 |
| RANBP6   | 350338  | 339  | 24  | 2780360 | 765400  | 0 | 7  | 2 | 0 | 18 | 19  | 8731968  | 6.40E-01 | 1 |
| PSME1    | 974559  | 220  | 41  | 746176  | 187256  | 0 | 2  | 1 | 0 | 50 | 62  | 24565780 | 6.40E-01 | 1 |
| IPO8     | 239796  | 580  | -19 | 2740488 | 687792  | 0 | 9  | 4 | 0 | 9  | 18  | 4682824  | 6.40E-01 | 1 |
| LEPR     | 178338  | 528  | -8  | 3237820 | 818444  | 0 | 9  | 2 | 0 | 5  | 6   | 3092572  | 6.40E-01 | 1 |
| MBD5     | 119685  | 955  | 7   | 3736932 | 1091496 | 0 | 8  | 1 | 0 | 12 | 10  | 6535804  | 6.40E-01 | 1 |
| FAM169B  | 149919  | 473  | -53 | 505164  | 134568  | 0 | 2  | 1 | 0 | 50 | 76  | 17954860 | 6.41E-01 | 1 |
| SGPP1    | 321254  | 311  | 18  | 1077612 | 349236  | 0 | 2  | 1 | 0 | 50 | 46  | 24415904 | 6.41E-01 | 1 |
| OGFRL1   | 132568  | 459  | -14 | 1172664 | 301176  | 0 | 7  | 1 | 0 | 1  | 4   | 1165188  | 6.41E-01 | 1 |
| SETMAR   | 96339   | 400  | -20 | 1734432 | 473124  | 0 | 2  | 0 | 0 | 12 | 10  | 6226796  | 6.41E-01 | 1 |
| ZACN     | 1611239 | 218  | 22  | 1040588 | 318976  | 0 | 2  | 1 | 0 | 50 | 86  | 24078416 | 6.41E-01 | 1 |
| GLRX3    | 84315   | 854  | -23 | 890000  | 231400  | 0 | 3  | 0 | 0 | 34 | 59  | 14018212 | 6.41E-01 | 1 |
| ADIPOQ   | 449980  | 384  | 25  | 611252  | 182272  | 0 | 2  | 0 | 0 | 18 | 26  | 8166284  | 6.41E-01 | 1 |
| MPP5     | 483147  | 260  | 32  | 1773236 | 443932  | 0 | 6  | 0 | 0 | 17 | 19  | 6370976  | 6.41E-01 | 1 |
| β6GALNAc | 1278941 | 201  | 51  | 849060  | 246708  | 0 | 2  | 0 | 0 | 50 | 53  | 22309808 | 6.41E-01 | 1 |
| PNMA5    | 249931  | NaN  | 35  | 1107160 | 331436  | 0 | 2  | 0 | 0 | 6  | 6   | 2788192  | 6.41E-01 | 1 |
| ZSWIM7   | 943249  | 350  | -33 | 495908  | 121396  | 0 | 1  | 1 | 0 | 50 | 81  | 22749824 | 6.41E-01 | 1 |
| ZNF329   | 1308496 | 619  | -64 | 1383772 | 357068  | 0 | 8  | 1 | 0 | 50 | 132 | 31228320 | 6.41E-01 | 1 |
| IMPAD1   | 137667  | 562  | -5  | 901748  | 268780  | 0 | 3  | 0 | 0 | 50 | 65  | 20366048 | 6.41E-01 | 1 |
| DNAJC5   | 1157316 | 206  | 36  | 520116  | 134568  | 0 | 1  | 0 | 0 | 50 | 49  | 18613460 | 6.41E-01 | 1 |
| G6PD     | 2163759 | NaN  | 42  | 1411184 | 389464  | 0 | 3  | 2 | 0 | 50 | 72  | 22102972 | 6.41E-01 | 1 |
| N4BP1    | 156698  | 392  | 1   | 2265940 | 633680  | 0 | 6  | 2 | 0 | 50 | 49  | 24281336 | 6.41E-01 | 1 |
| UGT1A7   | NaN     | NaN  | NaN | 1340696 | 377716  | 0 | 2  | 0 | 0 | 50 | 116 | 40023300 | 6.41E-01 | 1 |
| C21orf58 | 940047  | 624  | 53  | 798508  | 266288  | 0 | 3  | 0 | 0 | 25 | 46  | 14228964 | 6.41E-01 | 1 |
| SLC27A1  | 930383  | 202  | 34  | 1616596 | 505520  | 0 | 6  | 3 | 0 | 50 | 68  | 22072712 | 6.42E-01 | 1 |
| HTR1B    | 11897   | 1123 | -35 | 943044  | 309720  | 0 | 4  | 0 | 0 | 5  | 6   | 1763624  | 6.42E-01 | 1 |
| CS       | 2878071 | 171  | 46  | 1193312 | 345676  | 0 | 4  | 1 | 0 | 33 | 67  | 18798224 | 6.42E-01 | 1 |
| GPR180   | 149137  | 803  | 14  | 1146320 | 302956  | 0 | 2  | 0 | 0 | 7  | 6   | 2859392  | 6.42E-01 | 1 |
| IL34     | 884849  | 184  | 33  | 618728  | 181204  | 0 | 2  | 0 | 0 | 50 | 82  | 24395612 | 6.42E-01 | 1 |
| AADACL4  | 145424  | 454  | 23  | 1018516 | 301532  | 0 | 3  | 1 | 0 | 50 | 54  | 19660812 | 6.42E-01 | 1 |
| NOS1AP   | 372116  | 410  | 2   | 1335000 | 383412  | 0 | 4  | 0 | 0 | 16 | 22  | 6917436  | 6.42E-01 | 1 |

|          |         |     |     |         |        |   |    |   |   |    |    |          |          |   |
|----------|---------|-----|-----|---------|--------|---|----|---|---|----|----|----------|----------|---|
| ARHGAP30 | 689033  | 250 | 23  | 2749744 | 828056 | 0 | 12 | 2 | 0 | 12 | 19 | 4867588  | 6.42E-01 | 1 |
| BBX      | 224591  | 699 | 2   | 2457112 | 625136 | 0 | 7  | 2 | 0 | 25 | 32 | 12112544 | 6.42E-01 | 1 |
| ME1      | 173617  | 711 | -13 | 1485944 | 405484 | 0 | 5  | 1 | 0 | 50 | 71 | 24695364 | 6.42E-01 | 1 |
| USP8     | 325514  | 203 | 30  | 2911368 | 755076 | 0 | 11 | 3 | 0 | 38 | 49 | 18779356 | 6.42E-01 | 1 |
| RIT1     | 2096440 | 179 | 32  | 572448  | 153792 | 0 | 2  | 0 | 0 | 50 | 65 | 18558992 | 6.42E-01 | 1 |
| HTR3D    | 1423268 | 375 | 38  | 1293704 | 377716 | 0 | 3  | 0 | 0 | 5  | 2  | 2092924  | 6.42E-01 | 1 |
| WSB1     | 147758  | 292 | -21 | 1095056 | 291208 | 0 | 3  | 1 | 0 | 50 | 49 | 20077332 | 6.42E-01 | 1 |
| CEACAM4  | 1249321 | 499 | 27  | 615524  | 195088 | 0 | 2  | 1 | 0 | 50 | 82 | 23862680 | 6.43E-01 | 1 |
| IRX4     | 387770  | 635 | 11  | 1258460 | 424708 | 0 | 4  | 0 | 0 | 2  | 2  | 1692780  | 6.43E-01 | 1 |
| LINGO3   | 1553589 | 240 | 29  | 1379500 | 524744 | 0 | 5  | 1 | 0 | 50 | 57 | 18912144 | 6.43E-01 | 1 |
| OR10H4   | 843515  | 575 | 12  | 782132  | 232468 | 0 | 3  | 0 | 0 | 50 | 77 | 21682536 | 6.43E-01 | 1 |
| TMOD4    | 1562281 | 184 | 33  | 915632  | 233536 | 0 | 3  | 0 | 0 | 5  | 6  | 1818092  | 6.43E-01 | 1 |
| GPR61    | 1056159 | 272 | 37  | 1082596 | 365612 | 0 | 4  | 2 | 0 | 50 | 61 | 17976932 | 6.43E-01 | 1 |
| PDE4C    | 1178047 | 210 | 43  | 1927384 | 577076 | 0 | 5  | 2 | 0 | 3  | 5  | 2142052  | 6.43E-01 | 1 |
| FAR2     | 104924  | 674 | -4  | 1348528 | 351728 | 0 | 3  | 0 | 0 | 21 | 28 | 8973336  | 6.43E-01 | 1 |
| LDOC1    | 18788   | NaN | -20 | 369172  | 101816 | 0 | 1  | 0 | 0 | 50 | 76 | 19909300 | 6.43E-01 | 1 |
| FGF7     | 273513  | 370 | -7  | 508012  | 125312 | 0 | 1  | 0 | 0 | 50 | 42 | 20108304 | 6.43E-01 | 1 |
| NFKBIZ   | 550073  | 421 | 16  | 1835180 | 515488 | 0 | 4  | 2 | 0 | 50 | 52 | 20308020 | 6.43E-01 | 1 |
| ZNF281   | 264057  | 431 | 9   | 2250632 | 624424 | 0 | 6  | 0 | 0 | 7  | 7  | 3624080  | 6.43E-01 | 1 |
| MIF      | 649838  | 202 | 61  | 295836  | 86508  | 0 | 1  | 1 | 0 | 28 | 38 | 9653652  | 6.43E-01 | 1 |
| TTC9     | 244305  | 523 | 41  | 553580  | 169456 | 0 | 2  | 2 | 0 | 39 | 52 | 14247832 | 6.43E-01 | 1 |
| HAPLN3   | 562979  | 560 | 7   | 898544  | 275188 | 0 | 1  | 0 | 0 | 12 | 17 | 6029572  | 6.43E-01 | 1 |
| N6AMT1   | 312901  | 480 | 6   | 548240  | 164116 | 0 | 3  | 3 | 0 | 6  | 14 | 2210760  | 6.44E-01 | 1 |
| CALY     | 386585  | 472 | 13  | 555004  | 164828 | 0 | 1  | 0 | 0 | 50 | 46 | 19712788 | 6.44E-01 | 1 |
| GMCL1    | 857542  | 180 | 44  | 1370600 | 338200 | 0 | 3  | 0 | 0 | 27 | 25 | 9871880  | 6.44E-01 | 1 |
| KCTD15   | 680604  | 598 | -26 | 722680  | 223568 | 0 | 2  | 1 | 0 | 50 | 56 | 18372804 | 6.44E-01 | 1 |
| FBXO25   | 173778  | 838 | -19 | 1011396 | 210396 | 0 | 1  | 0 | 0 | 50 | 59 | 20999728 | 6.44E-01 | 1 |
| DVL2     | 1782958 | 316 | 21  | 1855116 | 566040 | 0 | 7  | 2 | 0 | 39 | 39 | 14081580 | 6.44E-01 | 1 |
| CHRNA6   | 594393  | 454 | 34  | 1264156 | 345320 | 0 | 1  | 1 | 0 | 50 | 55 | 25462900 | 6.44E-01 | 1 |
| FEZ2     | 451487  | 318 | -3  | 1001428 | 255608 | 0 | 2  | 0 | 0 | 12 | 23 | 6725908  | 6.44E-01 | 1 |
| ZDHHC20  | 383737  | 430 | 34  | 952656  | 231756 | 0 | 3  | 0 | 0 | 50 | 60 | 19911436 | 6.44E-01 | 1 |
| OR5H2    | 414958  | 885 | -14 | 786404  | 222856 | 0 | 3  | 2 | 0 | 50 | 65 | 18540480 | 6.44E-01 | 1 |
| SEC22C   | 352808  | 445 | 32  | 823784  | 222856 | 0 | 2  | 0 | 0 | 50 | 51 | 21713152 | 6.44E-01 | 1 |



|          |         |      |     |         |         |   |    |   |   |    |     |          |          |   |
|----------|---------|------|-----|---------|---------|---|----|---|---|----|-----|----------|----------|---|
| SNX17    | 1245306 | 182  | 52  | 1222504 | 346388  | 0 | 5  | 2 | 0 | 32 | 27  | 12262064 | 6.44E-01 | 1 |
| STK33    | 314196  | 551  | 13  | 1366684 | 330368  | 0 | 4  | 1 | 0 | 50 | 66  | 22391688 | 6.44E-01 | 1 |
| TMF1     | 263910  | 443  | 9   | 2841592 | 731936  | 0 | 7  | 0 | 0 | 6  | 4   | 2993248  | 6.44E-01 | 1 |
| POLM     | 1151124 | 282  | 56  | 1242440 | 388396  | 0 | 7  | 3 | 0 | 4  | 8   | 1887868  | 6.44E-01 | 1 |
| RXRB     | 1474628 | 377  | 24  | 1327880 | 421504  | 0 | 4  | 2 | 0 | 50 | 90  | 23548688 | 6.44E-01 | 1 |
| GRK1     | 785061  | NaN  | 36  | 830548  | 232112  | 0 | 2  | 0 | 0 | 50 | 59  | 23348616 | 6.45E-01 | 1 |
| WRB      | 383982  | 346  | 44  | 459596  | 120328  | 0 | 1  | 0 | 0 | 50 | 50  | 21398804 | 6.45E-01 | 1 |
| SNTG2    | 78833   | 824  | -24 | 1415812 | 382700  | 0 | 6  | 4 | 0 | 25 | 53  | 11809944 | 6.45E-01 | 1 |
| STRAP    | 323662  | 534  | 22  | 925244  | 237808  | 0 | 4  | 1 | 0 | 2  | 4   | 1266292  | 6.45E-01 | 1 |
| LDLRAD2  | 502881  | 181  | 28  | 669992  | 223924  | 0 | 2  | 2 | 0 | 9  | 21  | 7483120  | 6.45E-01 | 1 |
| COL4A5   | 118458  | NaN  | 19  | 4251352 | 1375940 | 0 | 5  | 3 | 0 | 33 | 28  | 16316192 | 6.45E-01 | 1 |
| PDCD2    | 425191  | 598  | -16 | 912784  | 244928  | 0 | 1  | 0 | 0 | 50 | 46  | 17122888 | 6.45E-01 | 1 |
| SLC6A15  | 20920   | 1015 | -34 | 1966900 | 537560  | 0 | 11 | 1 | 0 | 9  | 31  | 6894296  | 6.45E-01 | 1 |
| ZNF735   | NaN     | NaN  | NaN | 1079392 | 254540  | 0 | 3  | 1 | 0 | 50 | 117 | 39900124 | 6.45E-01 | 1 |
| MC3R     | 254407  | 729  | -58 | 801712  | 236384  | 0 | 4  | 1 | 0 | 50 | 93  | 23205148 | 6.45E-01 | 1 |
| RBP3     | 117080  | 445  | 21  | 3006420 | 1004988 | 0 | 10 | 4 | 0 | 50 | 54  | 20315496 | 6.45E-01 | 1 |
| PRKCE    | 172588  | 465  | 32  | 1915992 | 508368  | 0 | 4  | 2 | 0 | 50 | 63  | 23943136 | 6.45E-01 | 1 |
| AHCYL2   | 776656  | 420  | 44  | 1696696 | 460664  | 0 | 4  | 1 | 0 | 50 | 64  | 22600660 | 6.45E-01 | 1 |
| SMARCD3  | 610106  | 290  | 32  | 1290500 | 361696  | 0 | 3  | 1 | 0 | 50 | 52  | 23170260 | 6.46E-01 | 1 |
| SEMA6A   | 184843  | 1024 | 4   | 2636536 | 743684  | 0 | 4  | 1 | 0 | 11 | 8   | 5592760  | 6.46E-01 | 1 |
| THAP5    | 171249  | 838  | 6   | 1016736 | 262728  | 0 | 1  | 2 | 0 | 22 | 19  | 7302984  | 6.46E-01 | 1 |
| PARVA    | 447343  | 318  | -4  | 979712  | 268780  | 0 | 1  | 1 | 0 | 50 | 61  | 21123616 | 6.46E-01 | 1 |
| OR2M3    | 19998   | 935  | -32 | 768960  | 232824  | 0 | 5  | 3 | 0 | 7  | 15  | 2404780  | 6.46E-01 | 1 |
| TEKT2    | 853740  | 282  | 27  | 1104668 | 316840  | 0 | 3  | 1 | 0 | 50 | 63  | 23628076 | 6.46E-01 | 1 |
| SIL1     | 1351545 | 442  | 35  | 1177292 | 341404  | 0 | 2  | 1 | 0 | 30 | 40  | 12632304 | 6.46E-01 | 1 |
| MICA     | NaN     | NaN  | NaN | 986476  | 271628  | 0 | 1  | 0 | 0 | 50 | 116 | 39917212 | 6.46E-01 | 1 |
| ANKMY1   | 452566  | 485  | 21  | 2629416 | 746532  | 0 | 5  | 3 | 0 | 13 | 13  | 4432912  | 6.46E-01 | 1 |
| SENP5    | 766452  | 258  | 33  | 1967968 | 492704  | 0 | 7  | 1 | 0 | 41 | 59  | 17564328 | 6.46E-01 | 1 |
| RTN2     | 1183590 | 164  | 41  | 1349596 | 442508  | 0 | 3  | 1 | 0 | 50 | 61  | 18576080 | 6.46E-01 | 1 |
| ITPRIPL2 | 799976  | 275  | 20  | 1250272 | 467072  | 0 | 5  | 2 | 0 | 50 | 58  | 19469284 | 6.46E-01 | 1 |
| RAD9A    | 1269888 | 177  | 51  | 1001072 | 299752  | 0 | 2  | 1 | 0 | 31 | 22  | 11381320 | 6.46E-01 | 1 |
| PMEPA1   | 197938  | 488  | 15  | 730156  | 216092  | 0 | 2  | 0 | 0 | 50 | 47  | 17164896 | 6.47E-01 | 1 |
| NFYC     | 552400  | 323  | 24  | 933432  | 246708  | 0 | 1  | 1 | 0 | 50 | 50  | 20705316 | 6.47E-01 | 1 |

|          |         |      |     |         |         |   |    |   |   |    |     |          |          |   |
|----------|---------|------|-----|---------|---------|---|----|---|---|----|-----|----------|----------|---|
| SLC22A9  | 1061448 | 478  | 28  | 1407624 | 405840  | 0 | 3  | 0 | 0 | 25 | 32  | 11950564 | 6.47E-01 | 1 |
| TPD52L2  | 1140529 | 206  | 40  | 600216  | 170880  | 0 | 2  | 1 | 0 | 50 | 55  | 17291632 | 6.47E-01 | 1 |
| KNTC1    | 917926  | 215  | 37  | 5859404 | 1490572 | 0 | 15 | 4 | 0 | 15 | 16  | 6966920  | 6.47E-01 | 1 |
| PSMB5    | 1251074 | 185  | 39  | 727308  | 222144  | 0 | 2  | 0 | 0 | 50 | 62  | 21672924 | 6.47E-01 | 1 |
| C3orf18  | 603887  | 293  | 52  | 410824  | 127448  | 0 | 1  | 1 | 0 | 14 | 10  | 4594180  | 6.47E-01 | 1 |
| FAM92A1  | 221692  | 552  | -4  | 761128  | 199004  | 0 | 2  | 0 | 0 | 50 | 52  | 19445076 | 6.47E-01 | 1 |
| METAP1   | 218494  | 549  | 21  | 1016024 | 266644  | 0 | 2  | 0 | 0 | 50 | 37  | 18026772 | 6.47E-01 | 1 |
| FBXL14   | 333350  | 216  | 28  | 1015312 | 333572  | 0 | 3  | 3 | 0 | 3  | 7   | 2513716  | 6.47E-01 | 1 |
| PNCK     | 1716845 | NaN  | 44  | 1142760 | 328944  | 0 | 5  | 1 | 0 | 50 | 73  | 19103672 | 6.47E-01 | 1 |
| APOBEC3C | 1386387 | 372  | 71  | 504096  | 121752  | 0 | 2  | 0 | 0 | 50 | 61  | 16059872 | 6.47E-01 | 1 |
| ARSD     | 191640  | NaN  | 18  | 1630836 | 474192  | 0 | 5  | 0 | 0 | 34 | 36  | 12348928 | 6.47E-01 | 1 |
| C16orf78 | 18490   | 907  | -25 | 701676  | 169812  | 0 | 3  | 0 | 0 | 50 | 88  | 20997592 | 6.47E-01 | 1 |
| RAMP1    | 571081  | 382  | 23  | 373800  | 112140  | 0 | 1  | 1 | 0 | 15 | 19  | 7180164  | 6.47E-01 | 1 |
| LSP1     | 871765  | 481  | 43  | 898900  | 233180  | 0 | 2  | 0 | 0 | 50 | 50  | 21769756 | 6.47E-01 | 1 |
| PPID     | 188459  | 429  | 14  | 983272  | 243860  | 0 | 3  | 0 | 0 | 50 | 66  | 21358932 | 6.48E-01 | 1 |
| NKRD20A  | NaN     | NaN  | NaN | 2173380 | 526524  | 0 | 5  | 2 | 0 | 50 | 118 | 40172108 | 6.48E-01 | 1 |
| FAM3A    | 2163759 | NaN  | 42  | 617304  | 161268  | 0 | 2  | 0 | 0 | 50 | 72  | 22102972 | 6.48E-01 | 1 |
| FAIM3    | 467839  | 385  | 39  | 979356  | 307584  | 0 | 3  | 1 | 0 | 50 | 72  | 22657976 | 6.48E-01 | 1 |
| LHCGR    | 75021   | 934  | -16 | 1776796 | 510860  | 0 | 6  | 1 | 0 | 31 | 43  | 12769364 | 6.48E-01 | 1 |
| TMEM87A  | 595635  | 394  | 35  | 1522612 | 386972  | 0 | 4  | 1 | 0 | 50 | 51  | 20941344 | 6.48E-01 | 1 |
| CDC73    | 285984  | 442  | -12 | 1401572 | 371308  | 0 | 4  | 0 | 0 | 50 | 46  | 18043504 | 6.48E-01 | 1 |
| ZNF614   | 436768  | 901  | -53 | 1513712 | 376648  | 0 | 5  | 0 | 0 | 29 | 36  | 9985444  | 6.48E-01 | 1 |
| TMEM123  | 491236  | 312  | 16  | 520472  | 166252  | 0 | 3  | 2 | 0 | 16 | 23  | 4655412  | 6.48E-01 | 1 |
| PGM1     | 135416  | 330  | 3   | 1700968 | 470276  | 0 | 5  | 3 | 0 | 20 | 18  | 6057340  | 6.48E-01 | 1 |
| SLC10A7  | 60942   | 1043 | 16  | 917768  | 267712  | 0 | 3  | 0 | 0 | 50 | 48  | 19111504 | 6.48E-01 | 1 |
| NGFR     | 971109  | 303  | 31  | 1065152 | 327520  | 0 | 2  | 1 | 0 | 50 | 72  | 22431560 | 6.48E-01 | 1 |
| ADAP1    | 737267  | 310  | 41  | 984696  | 259524  | 0 | 2  | 1 | 0 | 15 | 6   | 3945904  | 6.48E-01 | 1 |
| PRKD3    | 482178  | 231  | 38  | 2319340 | 608048  | 0 | 6  | 1 | 0 | 31 | 18  | 11177688 | 6.48E-01 | 1 |
| REN      | 557652  | 370  | 34  | 1048776 | 295836  | 0 | 3  | 2 | 0 | 9  | 11  | 3453200  | 6.48E-01 | 1 |
| NPEPL1   | 1026997 | 504  | 15  | 1187616 | 375936  | 0 | 4  | 0 | 0 | 5  | 7   | 2286944  | 6.48E-01 | 1 |
| LMTK2    | 457962  | 375  | 19  | 3788908 | 1085444 | 0 | 15 | 4 | 0 | 50 | 53  | 18947032 | 6.48E-01 | 1 |
| PI15     | 149375  | 824  | -13 | 667500  | 183696  | 0 | 2  | 0 | 0 | 50 | 80  | 23346836 | 6.48E-01 | 1 |
| NR1H3    | 1274054 | 198  | 38  | 1148456 | 325384  | 0 | 3  | 2 | 0 | 50 | 62  | 18403064 | 6.48E-01 | 1 |

|          |         |      |     |         |         |   |    |   |   |    |     |          |          |   |
|----------|---------|------|-----|---------|---------|---|----|---|---|----|-----|----------|----------|---|
| UNC13B   | 1081701 | 432  | 37  | 4167692 | 1095412 | 0 | 9  | 2 | 0 | 6  | 2   | 2528668  | 6.49E-01 | 1 |
| ZNF443   | 1754294 | 593  | 0   | 1746180 | 419724  | 0 | 5  | 0 | 0 | 6  | 7   | 3661460  | 6.49E-01 | 1 |
| 1GALT1C  | 388105  | NaN  | 7   | 827700  | 202920  | 0 | 2  | 0 | 0 | 50 | 56  | 20001504 | 6.49E-01 | 1 |
| CCT8     | 316438  | 178  | 79  | 1430408 | 390532  | 0 | 3  | 1 | 0 | 24 | 34  | 10688544 | 6.49E-01 | 1 |
| RPS15    | 2352825 | 221  | 38  | 374868  | 110004  | 0 | 1  | 1 | 0 | 21 | 20  | 7617688  | 6.49E-01 | 1 |
| TMEM38A  | 980514  | 362  | 41  | 764688  | 220008  | 0 | 4  | 1 | 0 | 50 | 85  | 21686096 | 6.49E-01 | 1 |
| C6orf136 | 2115149 | 171  | 41  | 1198296 | 415452  | 0 | 4  | 2 | 0 | 50 | 71  | 23126828 | 6.49E-01 | 1 |
| ASCC3    | 103404  | 825  | 2   | 5806360 | 1530800 | 0 | 17 | 7 | 0 | 45 | 50  | 16309784 | 6.49E-01 | 1 |
| CRYGS    | 676664  | 501  | 35  | 469208  | 114988  | 0 | 2  | 1 | 0 | 2  | 1   | 779996   | 6.49E-01 | 1 |
| KLHL35   | 587975  | 205  | 39  | 1409048 | 483448  | 0 | 3  | 0 | 0 | 8  | 10  | 4402652  | 6.49E-01 | 1 |
| KRT40    | 977588  | 404  | 10  | 1108584 | 304380  | 0 | 5  | 1 | 0 | 50 | 68  | 14276668 | 6.49E-01 | 1 |
| PRCC     | 1649536 | 208  | 53  | 1221792 | 380208  | 0 | 4  | 0 | 0 | 15 | 17  | 6672508  | 6.49E-01 | 1 |
| OR2D3    | 403341  | 827  | 6   | 814172  | 245284  | 0 | 4  | 1 | 0 | 23 | 38  | 8913172  | 6.50E-01 | 1 |
| RNASE4   | 709113  | 577  | 11  | 373444  | 105020  | 0 | 1  | 0 | 0 | 50 | 80  | 24629148 | 6.50E-01 | 1 |
| SYNM     | 271694  | 361  | -3  | 3844088 | 1185124 | 0 | 7  | 0 | 0 | 6  | 4   | 4005712  | 6.50E-01 | 1 |
| EVX2     | 242935  | 874  | 15  | 1135284 | 399432  | 0 | 3  | 0 | 0 | 8  | 6   | 2472776  | 6.50E-01 | 1 |
| KCNQ4    | 428440  | 188  | 32  | 1739416 | 548240  | 0 | 3  | 2 | 0 | 10 | 9   | 3535080  | 6.50E-01 | 1 |
| FAM78A   | 745091  | 213  | 50  | 709864  | 204344  | 0 | 2  | 1 | 0 | 50 | 53  | 18357496 | 6.50E-01 | 1 |
| DMXL2    | 380843  | 422  | 11  | 7805300 | 2107876 | 0 | 33 | 8 | 0 | 50 | 80  | 26239336 | 6.50E-01 | 1 |
| ZNF154   | 680410  | 849  | -50 | 1123892 | 288004  | 0 | 3  | 2 | 0 | 50 | 69  | 18021076 | 6.50E-01 | 1 |
| HBE1     | 109545  | 1056 | -1  | 376292  | 106444  | 0 | 1  | 0 | 0 | 50 | 50  | 17996156 | 6.50E-01 | 1 |
| MCAM     | 1087523 | 214  | 48  | 1662164 | 477040  | 0 | 7  | 5 | 0 | 8  | 11  | 3051276  | 6.50E-01 | 1 |
| GPATCH3  | 1025094 | 188  | 34  | 1317556 | 395516  | 0 | 4  | 1 | 0 | 50 | 62  | 18463584 | 6.50E-01 | 1 |
| ZNF841   | NaN     | NaN  | NaN | 2378080 | 602708  | 0 | 6  | 1 | 0 | 50 | 117 | 40248292 | 6.50E-01 | 1 |
| PTAR1    | 288169  | 640  | -11 | 1040944 | 282308  | 0 | 2  | 1 | 0 | 50 | 44  | 23027148 | 6.50E-01 | 1 |
| NHLH2    | 503800  | 639  | 9   | 331792  | 108224  | 0 | 1  | 0 | 0 | 50 | 64  | 20102608 | 6.51E-01 | 1 |
| EPHB6    | 284406  | 645  | 18  | 2539704 | 802068  | 0 | 9  | 2 | 0 | 46 | 48  | 19769392 | 6.51E-01 | 1 |
| ELF1     | 291800  | 476  | 39  | 1563552 | 452832  | 0 | 2  | 3 | 0 | 26 | 26  | 8817408  | 6.51E-01 | 1 |
| ZNF527   | 228816  | 939  | -63 | 1602356 | 369172  | 0 | 4  | 0 | 0 | 27 | 22  | 9756892  | 6.51E-01 | 1 |
| UROD     | 939872  | 310  | 20  | 936636  | 280884  | 0 | 3  | 1 | 0 | 50 | 62  | 19779716 | 6.51E-01 | 1 |
| NPDC1    | 1951939 | 202  | 40  | 805272  | 273408  | 0 | 3  | 1 | 0 | 50 | 61  | 21392396 | 6.51E-01 | 1 |
| TPD52L3  | 355544  | 469  | 16  | 415452  | 123888  | 0 | 1  | 0 | 0 | 50 | 45  | 18541548 | 6.51E-01 | 1 |
| RPL10L   | 10737   | 1057 | -48 | 541120  | 152012  | 0 | 2  | 2 | 0 | 4  | 5   | 1223928  | 6.51E-01 | 1 |

|           |         |     |     |         |         |   |    |   |   |    |     |          |          |   |
|-----------|---------|-----|-----|---------|---------|---|----|---|---|----|-----|----------|----------|---|
| APLF      | 227462  | 617 | 22  | 1341764 | 337132  | 0 | 4  | 1 | 0 | 7  | 8   | 4014612  | 6.51E-01 | 1 |
| CHUK      | 1070291 | 198 | 25  | 1987548 | 490212  | 0 | 6  | 1 | 0 | 50 | 78  | 19641944 | 6.51E-01 | 1 |
| MTF1      | 445066  | 303 | 33  | 1901396 | 557140  | 0 | 6  | 0 | 0 | 10 | 6   | 3345688  | 6.51E-01 | 1 |
| DN1-GTF2L | 75084   | 934 | -3  | 3017456 | 817732  | 0 | 7  | 1 | 0 | 9  | 16  | 4807424  | 6.51E-01 | 1 |
| WDR76     | 792287  | 375 | 34  | 1620512 | 439660  | 0 | 5  | 1 | 0 | 50 | 62  | 24020032 | 6.52E-01 | 1 |
| DYRK1B    | 1289328 | 526 | 23  | 1559992 | 500180  | 0 | 4  | 0 | 0 | 17 | 31  | 9835924  | 6.52E-01 | 1 |
| ANKDD1A   | 705779  | 185 | 57  | 1348528 | 389108  | 0 | 4  | 2 | 0 | 50 | 75  | 20194100 | 6.52E-01 | 1 |
| PAX4      | 411207  | 619 | -7  | 856180  | 280172  | 0 | 4  | 2 | 0 | 7  | 7   | 2091856  | 6.52E-01 | 1 |
| OPN5      | 173532  | 829 | -4  | 905308  | 259880  | 0 | 3  | 1 | 0 | 50 | 61  | 18813888 | 6.52E-01 | 1 |
| UPK2      | 1457410 | 180 | 55  | 452476  | 159488  | 0 | 1  | 0 | 0 | 50 | 46  | 18727024 | 6.52E-01 | 1 |
| ZNF451    | 372718  | 348 | 26  | 2794956 | 667500  | 0 | 9  | 3 | 0 | 4  | 5   | 2547536  | 6.52E-01 | 1 |
| CMTM6     | 436595  | 592 | 31  | 463868  | 138484  | 0 | 1  | 0 | 0 | 50 | 59  | 24824236 | 6.52E-01 | 1 |
| FUT3      | 1217326 | 294 | 35  | 890000  | 274120  | 0 | 3  | 1 | 0 | 50 | 56  | 18189820 | 6.52E-01 | 1 |
| MFAP5     | 297035  | 320 | 19  | 478464  | 117480  | 0 | 1  | 0 | 0 | 50 | 52  | 22957016 | 6.52E-01 | 1 |
| ZNF589    | 1083690 | 193 | 38  | 929516  | 254896  | 0 | 3  | 1 | 0 | 50 | 49  | 17416588 | 6.52E-01 | 1 |
| OR5M3     | NaN     | NaN | NaN | 768248  | 216448  | 0 | 2  | 3 | 0 | 8  | 19  | 4142416  | 6.52E-01 | 1 |
| SRPK2     | 452775  | 468 | 34  | 1877188 | 474548  | 0 | 6  | 2 | 0 | 50 | 41  | 18391672 | 6.52E-01 | 1 |
| TSPYL4    | 260690  | 640 | 16  | 1023144 | 308652  | 0 | 3  | 1 | 0 | 20 | 27  | 9815632  | 6.52E-01 | 1 |
| GHITM     | 216194  | 860 | -26 | 881100  | 261660  | 0 | 4  | 2 | 0 | 50 | 77  | 19237528 | 6.52E-01 | 1 |
| SOX6      | 126866  | 989 | -18 | 2228560 | 587756  | 0 | 8  | 2 | 0 | 35 | 52  | 15092620 | 6.52E-01 | 1 |
| TRIM39    | 2043435 | 430 | 32  | 1311148 | 381632  | 0 | 4  | 1 | 0 | 50 | 49  | 19085516 | 6.52E-01 | 1 |
| CDK6      | 697669  | 464 | 26  | 834820  | 238520  | 0 | 4  | 3 | 0 | 9  | 12  | 3424720  | 6.52E-01 | 1 |
| SMYD1     | 175471  | 543 | 6   | 1291924 | 321824  | 0 | 4  | 1 | 0 | 48 | 61  | 22357512 | 6.52E-01 | 1 |
| LY75      | 325669  | 405 | 36  | 4572820 | 1095056 | 0 | 13 | 2 | 0 | 21 | 20  | 8167708  | 6.52E-01 | 1 |
| ZNF572    | 550341  | 596 | 20  | 1391604 | 315060  | 0 | 7  | 1 | 0 | 7  | 10  | 2823080  | 6.52E-01 | 1 |
| CD27      | 2702142 | 198 | 50  | 673552  | 184052  | 0 | 4  | 1 | 0 | 4  | 24  | 5194396  | 6.52E-01 | 1 |
| SETD4     | 219580  | 318 | 66  | 1175512 | 313280  | 0 | 5  | 0 | 0 | 50 | 70  | 20787908 | 6.52E-01 | 1 |
| DIRAS1    | 1354357 | 291 | 25  | 498756  | 143112  | 0 | 1  | 1 | 0 | 50 | 54  | 21517708 | 6.52E-01 | 1 |
| AGPAT5    | 130932  | 475 | 32  | 949808  | 249556  | 0 | 1  | 0 | 0 | 50 | 67  | 24458624 | 6.53E-01 | 1 |
| IL6R      | 1724679 | 319 | 39  | 1193312 | 347812  | 0 | 4  | 0 | 0 | 10 | 18  | 6483116  | 6.53E-01 | 1 |
| ACOXL     | NaN     | NaN | NaN | 1516204 | 417944  | 0 | 3  | 1 | 0 | 50 | 117 | 40063528 | 6.53E-01 | 1 |
| CREB3     | 922448  | 190 | 48  | 951944  | 274120  | 0 | 6  | 4 | 0 | 4  | 8   | 1514068  | 6.53E-01 | 1 |
| FIBCD1    | 764789  | 241 | 29  | 1149168 | 360984  | 0 | 3  | 2 | 0 | 50 | 80  | 24081976 | 6.53E-01 | 1 |

|         |         |      |     |         |         |   |    |   |   |    |     |          |          |   |
|---------|---------|------|-----|---------|---------|---|----|---|---|----|-----|----------|----------|---|
| KCNS3   | 143212  | 1197 | 6   | 1238524 | 342116  | 0 | 4  | 1 | 0 | 50 | 58  | 19093704 | 6.53E-01 | 1 |
| MRPS10  | 524386  | 273  | 43  | 537204  | 137772  | 0 | 1  | 0 | 0 | 50 | 56  | 22267444 | 6.53E-01 | 1 |
| PMF1    | 2280435 | 211  | 36  | 534356  | 144892  | 0 | 1  | 1 | 0 | 4  | 1   | 1493420  | 6.53E-01 | 1 |
| OSTN    | 124914  | 878  | 7   | 333216  | 102528  | 0 | 1  | 0 | 0 | 50 | 64  | 20044224 | 6.53E-01 | 1 |
| MEFV    | 1445318 | 253  | 37  | 1961560 | 584552  | 0 | 8  | 4 | 0 | 5  | 6   | 2317916  | 6.54E-01 | 1 |
| ABT1    | 411992  | 498  | 24  | 677112  | 208260  | 0 | 2  | 1 | 0 | 1  | 2   | 1415456  | 6.54E-01 | 1 |
| CHRM2   | 72122   | 1001 | -25 | 1166256 | 334284  | 0 | 4  | 2 | 0 | 50 | 106 | 25519148 | 6.54E-01 | 1 |
| WNK3    | 352631  | NaN  | 25  | 4595604 | 1268784 | 0 | 10 | 0 | 0 | 0  | 0   | 1268784  | 6.54E-01 | 1 |
| SNCA    | 65544   | 475  | -7  | 372732  | 100392  | 0 | 1  | 0 | 0 | 50 | 60  | 20713860 | 6.54E-01 | 1 |
| SFTPA2  | 478276  | NaN  | 11  | 626916  | 187968  | 0 | 2  | 1 | 0 | 50 | 83  | 24692872 | 6.54E-01 | 1 |
| MTMR9   | 499514  | 671  | 36  | 1423644 | 377004  | 0 | 2  | 0 | 0 | 15 | 14  | 6600240  | 6.54E-01 | 1 |
| MEF2D   | 2141203 | 201  | 41  | 1309012 | 406196  | 0 | 2  | 2 | 0 | 50 | 61  | 21808916 | 6.54E-01 | 1 |
| HERPUD2 | 189678  | 636  | 4   | 1053048 | 280884  | 0 | 3  | 1 | 0 | 6  | 2   | 1680320  | 6.54E-01 | 1 |
| GP2     | 243266  | 848  | -5  | 1393384 | 377360  | 0 | 4  | 1 | 0 | 50 | 54  | 19846644 | 6.54E-01 | 1 |
| PMCH    | 229712  | 552  | 12  | 432896  | 111784  | 0 | 1  | 0 | 0 | 50 | 54  | 22837756 | 6.54E-01 | 1 |
| OR1A1   | 506514  | 628  | 0   | 760060  | 231044  | 0 | 3  | 2 | 0 | 13 | 18  | 5228216  | 6.54E-01 | 1 |
| NRN1    | 49114   | 693  | 17  | 364900  | 101816  | 0 | 1  | 1 | 0 | 50 | 57  | 19565760 | 6.54E-01 | 1 |
| PADI3   | 490967  | 168  | 38  | 1719124 | 477752  | 0 | 4  | 5 | 0 | 38 | 35  | 11720944 | 6.54E-01 | 1 |
| SPATA18 | 137116  | 878  | 9   | 1401572 | 376648  | 0 | 5  | 1 | 0 | 50 | 63  | 21726324 | 6.54E-01 | 1 |
| TSPAN13 | 360860  | 385  | -12 | 524744  | 153436  | 0 | 1  | 0 | 0 | 50 | 41  | 21229704 | 6.55E-01 | 1 |
| SLC24A2 | 493733  | 635  | -12 | 1689220 | 472412  | 0 | 5  | 2 | 0 | 50 | 34  | 15038508 | 6.55E-01 | 1 |
| EVX1    | 473864  | 394  | 13  | 977932  | 337844  | 0 | 3  | 1 | 0 | 50 | 80  | 25624168 | 6.55E-01 | 1 |
| SLC10A4 | 310162  | 396  | 52  | 1055540 | 356356  | 0 | 2  | 0 | 0 | 50 | 60  | 20167400 | 6.55E-01 | 1 |
| RDX     | 137601  | 158  | 10  | 1558924 | 367748  | 0 | 4  | 0 | 0 | 50 | 52  | 21970540 | 6.55E-01 | 1 |
| LSM14A  | 655485  | 284  | -13 | 1216808 | 340336  | 0 | 3  | 2 | 0 | 50 | 72  | 19162768 | 6.55E-01 | 1 |
| SNX25   | 295066  | 528  | 30  | 2230340 | 541120  | 0 | 5  | 1 | 0 | 28 | 28  | 12727356 | 6.55E-01 | 1 |
| CYP1A1  | 746043  | 199  | 41  | 1293348 | 375936  | 0 | 3  | 1 | 0 | 18 | 22  | 7453928  | 6.55E-01 | 1 |
| PDE4B   | 103928  | 596  | -8  | 2229272 | 578500  | 0 | 5  | 2 | 0 | 50 | 53  | 19697124 | 6.55E-01 | 1 |
| CHRDL2  | 521541  | 204  | 40  | 1173376 | 323960  | 0 | 4  | 1 | 0 | 50 | 47  | 14958052 | 6.55E-01 | 1 |
| SVOP    | 574926  | NaN  | 32  | 782132  | 229264  | 0 | 2  | 1 | 0 | 48 | 63  | 24015404 | 6.55E-01 | 1 |
| OR11H12 | 141957  | 747  | -11 | 808832  | 236740  | 0 | 3  | 1 | 0 | 5  | 7   | 1889648  | 6.55E-01 | 1 |
| RAP1A   | 348519  | 394  | 29  | 498756  | 123888  | 0 | 1  | 0 | 0 | 50 | 57  | 25593552 | 6.55E-01 | 1 |
| ZFR     | 386475  | 357  | 27  | 2744048 | 783556  | 0 | 4  | 0 | 0 | 12 | 6   | 6765780  | 6.55E-01 | 1 |

|          |         |      |     |         |         |   |    |   |   |    |     |          |          |   |
|----------|---------|------|-----|---------|---------|---|----|---|---|----|-----|----------|----------|---|
| KRBA1    | 471461  | 615  | 29  | 2533296 | 833040  | 0 | 4  | 3 | 0 | 32 | 36  | 14158832 | 6.55E-01 | 1 |
| ATP13A3  | 324325  | 269  | 27  | 3221088 | 842652  | 0 | 11 | 3 | 0 | 19 | 32  | 9495944  | 6.55E-01 | 1 |
| CCDC138  | 366787  | 474  | 8   | 1760776 | 435032  | 0 | 4  | 1 | 0 | 23 | 24  | 9242116  | 6.56E-01 | 1 |
| PATE2    | 607531  | 493  | 3   | 310432  | 69776   | 0 | 1  | 1 | 0 | 6  | 7   | 2338564  | 6.56E-01 | 1 |
| FGF14    | 82526   | 937  | -2  | 823072  | 215024  | 0 | 3  | 2 | 0 | 50 | 75  | 20368896 | 6.56E-01 | 1 |
| NMI      | 215149  | 617  | 17  | 820224  | 196512  | 0 | 1  | 1 | 0 | 18 | 13  | 4237112  | 6.56E-01 | 1 |
| PCDHGA10 | NaN     | NaN  | NaN | 2387692 | 749024  | 0 | 9  | 3 | 0 | 50 | 119 | 40394608 | 6.56E-01 | 1 |
| FCHSD2   | 475608  | 318  | 46  | 1956576 | 498756  | 0 | 3  | 0 | 0 | 27 | 25  | 12460356 | 6.56E-01 | 1 |
| NAV3     | 23591   | 1077 | -25 | 6021028 | 1715564 | 0 | 25 | 7 | 0 | 23 | 62  | 15398424 | 6.56E-01 | 1 |
| SLC5A3   | 823351  | 574  | 88  | 1776084 | 527592  | 0 | 6  | 2 | 0 | 21 | 19  | 7765784  | 6.56E-01 | 1 |
| OR5M11   | NaN     | NaN  | NaN | 751516  | 227840  | 0 | 2  | 0 | 0 | 50 | 116 | 39873424 | 6.56E-01 | 1 |
| PPP2R2C  | 480192  | 540  | 50  | 1233184 | 315416  | 0 | 4  | 3 | 0 | 26 | 26  | 9280208  | 6.56E-01 | 1 |
| CYTH3    | NaN     | NaN  | NaN | 1075120 | 257744  | 0 | 2  | 2 | 0 | 26 | 42  | 11834864 | 6.56E-01 | 1 |
| UGT2B10  | 99797   | 764  | 14  | 2700972 | 708084  | 0 | 4  | 1 | 0 | 50 | 47  | 20739492 | 6.56E-01 | 1 |
| C11orf30 | 268174  | 391  | 43  | 3320412 | 1003920 | 0 | 12 | 3 | 0 | 16 | 21  | 6360652  | 6.56E-01 | 1 |
| SLC5A4   | 498785  | 580  | -34 | 1693136 | 485584  | 0 | 5  | 3 | 0 | 50 | 51  | 16560764 | 6.56E-01 | 1 |
| CHCHD10  | 637355  | 196  | 52  | 354932  | 118192  | 0 | 1  | 0 | 0 | 50 | 63  | 20521620 | 6.57E-01 | 1 |
| GH2      | 1446139 | 380  | 27  | 881100  | 202920  | 0 | 3  | 0 | 0 | 50 | 63  | 18745892 | 6.57E-01 | 1 |
| PAMR1    | 646177  | 410  | 0   | 1896412 | 517268  | 0 | 3  | 2 | 0 | 50 | 39  | 17770096 | 6.57E-01 | 1 |
| MAPK14   | 490595  | 314  | 41  | 1422576 | 394092  | 0 | 3  | 1 | 0 | 50 | 43  | 18722040 | 6.57E-01 | 1 |
| GRM4     | 1013590 | 629  | 35  | 2276620 | 687080  | 0 | 7  | 5 | 0 | 48 | 57  | 16902168 | 6.57E-01 | 1 |
| DHODH    | 438866  | 372  | 19  | 984696  | 320400  | 0 | 1  | 0 | 0 | 50 | 58  | 21008628 | 6.57E-01 | 1 |
| HARBI1   | 914919  | 176  | 39  | 873268  | 252404  | 0 | 3  | 0 | 0 | 50 | 74  | 21923192 | 6.57E-01 | 1 |
| HBB      | 109545  | 1056 | -1  | 370596  | 114276  | 0 | 1  | 0 | 0 | 50 | 50  | 17996156 | 6.57E-01 | 1 |
| USP38    | 182738  | 678  | 3   | 2626568 | 753652  | 0 | 7  | 1 | 0 | 20 | 20  | 8266320  | 6.57E-01 | 1 |
| SMYD3    | 219137  | 939  | -6  | 1132436 | 289072  | 0 | 1  | 0 | 0 | 50 | 46  | 18302316 | 6.57E-01 | 1 |
| IFITM5   | 1463610 | 437  | 24  | 320756  | 111784  | 0 | 1  | 0 | 0 | 50 | 72  | 18233964 | 6.57E-01 | 1 |
| OR5R1    | NaN     | NaN  | NaN | 801356  | 237808  | 0 | 3  | 2 | 0 | 26 | 42  | 11814928 | 6.57E-01 | 1 |
| STK10    | 329023  | 272  | 49  | 2521904 | 659668  | 0 | 5  | 2 | 0 | 50 | 41  | 18569672 | 6.58E-01 | 1 |
| AMT      | 1585328 | 201  | 32  | 1040588 | 317908  | 0 | 3  | 1 | 0 | 14 | 11  | 4719136  | 6.58E-01 | 1 |
| ZSCAN5A  | 486579  | 522  | -32 | 1257748 | 347456  | 0 | 3  | 1 | 0 | 50 | 64  | 16936344 | 6.58E-01 | 1 |
| FER1L6   | 453048  | 561  | 15  | 4853348 | 1270564 | 0 | 14 | 6 | 0 | 50 | 59  | 19966616 | 6.58E-01 | 1 |
| ICAM1    | 1729517 | 200  | 31  | 1301180 | 432184  | 0 | 6  | 1 | 0 | 50 | 94  | 24020032 | 6.58E-01 | 1 |

|          |         |      |     |         |         |   |    |   |   |    |     |          |          |   |
|----------|---------|------|-----|---------|---------|---|----|---|---|----|-----|----------|----------|---|
| LILRA1   | 978578  | 625  | -1  | 1233896 | 374512  | 0 | 5  | 1 | 0 | 50 | 108 | 22158508 | 6.58E-01 | 1 |
| PHAX     | 235652  | 347  | 15  | 1025636 | 259168  | 0 | 3  | 1 | 0 | 50 | 55  | 18930300 | 6.58E-01 | 1 |
| MMP16    | 27285   | 939  | -34 | 1705240 | 445712  | 0 | 10 | 0 | 0 | 3  | 4   | 1146676  | 6.58E-01 | 1 |
| SLC35A3  | 287540  | 530  | 9   | 831616  | 242792  | 0 | 2  | 0 | 0 | 50 | 55  | 22041028 | 6.58E-01 | 1 |
| P2RY10   | 14218   | NaN  | 50  | 858672  | 234960  | 0 | 2  | 1 | 0 | 50 | 43  | 18270276 | 6.58E-01 | 1 |
| CC2D2A   | 163271  | 420  | 27  | 4421876 | 1140268 | 0 | 9  | 2 | 0 | 9  | 7   | 4304752  | 6.58E-01 | 1 |
| RNASE13  | 937278  | 320  | 20  | 399432  | 107868  | 0 | 1  | 0 | 0 | 50 | 63  | 19474980 | 6.58E-01 | 1 |
| UBE2Q1   | 1896659 | 403  | 41  | 1108584 | 300108  | 0 | 2  | 0 | 0 | 50 | 61  | 17758348 | 6.58E-01 | 1 |
| IKBKE    | 504324  | 300  | 4   | 1855116 | 527592  | 0 | 4  | 2 | 0 | 50 | 73  | 25409144 | 6.58E-01 | 1 |
| C1orf189 | 2028928 | 185  | 35  | 280884  | 63012   | 0 | 1  | 0 | 0 | 50 | 68  | 16958060 | 6.58E-01 | 1 |
| ACADVL   | 1782958 | 316  | 21  | 1688508 | 496620  | 0 | 3  | 1 | 0 | 39 | 39  | 14081580 | 6.58E-01 | 1 |
| CA12     | 449769  | 275  | 47  | 927024  | 253116  | 0 | 2  | 0 | 0 | 50 | 57  | 22268868 | 6.58E-01 | 1 |
| PEX12    | 756039  | 227  | 14  | 892848  | 269136  | 0 | 5  | 3 | 0 | 9  | 13  | 3221088  | 6.58E-01 | 1 |
| CRTP13   | 14979   | 1035 | -68 | 396940  | 116768  | 0 | 2  | 0 | 0 | 50 | 77  | 14168444 | 6.58E-01 | 1 |
| EIF5AL1  | 342919  | 284  | 39  | 389464  | 109292  | 0 | 1  | 0 | 0 | 50 | 47  | 17143536 | 6.59E-01 | 1 |
| FAIM     | 198181  | 515  | 26  | 607336  | 148808  | 0 | 1  | 0 | 0 | 50 | 39  | 20230768 | 6.59E-01 | 1 |
| POLR2H   | 1447013 | 268  | 44  | 401924  | 101104  | 0 | 1  | 0 | 0 | 50 | 77  | 28073092 | 6.59E-01 | 1 |
| APOL3    | 1228837 | 331  | 13  | 993596  | 308296  | 0 | 1  | 0 | 0 | 10 | 14  | 5496284  | 6.59E-01 | 1 |
| RPL28    | 1038859 | 194  | 22  | 702388  | 203276  | 0 | 1  | 0 | 0 | 17 | 8   | 4536152  | 6.59E-01 | 1 |
| OR3A1    | 506514  | 628  | 0   | 761484  | 250980  | 0 | 1  | 2 | 0 | 13 | 18  | 5228216  | 6.59E-01 | 1 |
| CST2     | 159399  | 889  | -45 | 364188  | 101460  | 0 | 1  | 0 | 0 | 50 | 66  | 16827052 | 6.59E-01 | 1 |
| RASGRP3  | 124045  | 680  | 9   | 1811328 | 466716  | 0 | 5  | 1 | 0 | 50 | 74  | 26184868 | 6.59E-01 | 1 |
| NFATC4   | 897133  | 265  | 40  | 2388760 | 816308  | 0 | 6  | 0 | 0 | 1  | 0   | 995020   | 6.59E-01 | 1 |
| CPSF6    | 758784  | 353  | 3   | 1373804 | 433252  | 0 | 3  | 1 | 0 | 50 | 62  | 19068072 | 6.59E-01 | 1 |
| MYD88    | 302137  | 411  | 32  | 817732  | 218228  | 0 | 2  | 0 | 0 | 50 | 54  | 20798588 | 6.59E-01 | 1 |
| CIZ1     | 1762678 | 201  | 44  | 2297624 | 651124  | 0 | 6  | 0 | 0 | 3  | 2   | 1485588  | 6.59E-01 | 1 |
| LPIN2    | 583114  | 425  | 44  | 2335360 | 619796  | 0 | 7  | 1 | 0 | 19 | 23  | 8192984  | 6.59E-01 | 1 |
| SEC11A   | 341258  | 214  | 52  | 470276  | 127804  | 0 | 1  | 0 | 0 | 50 | 46  | 19417664 | 6.59E-01 | 1 |
| RGS20    | 266629  | 345  | 18  | 1037384 | 308296  | 0 | 2  | 0 | 0 | 44 | 43  | 19227560 | 6.60E-01 | 1 |
| HDDC2    | 155442  | 373  | -19 | 537560  | 140620  | 0 | 1  | 0 | 0 | 50 | 54  | 21922836 | 6.60E-01 | 1 |
| ABCC9    | 529911  | 984  | -17 | 4139568 | 1136352 | 0 | 17 | 5 | 0 | 50 | 63  | 17526236 | 6.60E-01 | 1 |
| ARHGDI1  | 3798594 | 211  | 19  | 538628  | 139552  | 0 | 1  | 0 | 0 | 34 | 28  | 11428668 | 6.60E-01 | 1 |
| ZUFSP    | 247712  | 479  | 10  | 1524392 | 369172  | 0 | 3  | 2 | 0 | 50 | 50  | 20262808 | 6.60E-01 | 1 |

|           |         |      |     |         |         |   |    |   |   |    |     |          |          |   |
|-----------|---------|------|-----|---------|---------|---|----|---|---|----|-----|----------|----------|---|
| PIGG      | 562684  | 624  | 19  | 2446076 | 757924  | 0 | 7  | 3 | 0 | 38 | 51  | 14207960 | 6.60E-01 | 1 |
| SLC38A11  | 80659   | 427  | -3  | 989324  | 282664  | 0 | 1  | 1 | 0 | 50 | 59  | 20497056 | 6.60E-01 | 1 |
| CASK      | 531097  | NaN  | 45  | 2456756 | 626560  | 0 | 7  | 1 | 0 | 19 | 31  | 11548996 | 6.60E-01 | 1 |
| HDAC9     | 65395   | 684  | -6  | 2883956 | 792100  | 0 | 7  | 4 | 0 | 48 | 63  | 22503472 | 6.60E-01 | 1 |
| DNLZ      | 1194160 | 258  | 28  | 433964  | 150232  | 0 | 1  | 0 | 0 | 50 | 42  | 16832036 | 6.60E-01 | 1 |
| PRPH      | 2154742 | 171  | 49  | 1188684 | 356712  | 0 | 4  | 2 | 0 | 50 | 57  | 20003284 | 6.60E-01 | 1 |
| GOT1L1    | 660779  | 379  | 37  | 974372  | 261304  | 0 | 2  | 0 | 0 | 40 | 53  | 23201232 | 6.60E-01 | 1 |
| TRPM3     | 135903  | 707  | -9  | 4499484 | 1204704 | 0 | 17 | 1 | 0 | 1  | 2   | 1478824  | 6.60E-01 | 1 |
| CLNK      | 214087  | 1111 | 17  | 1177648 | 273764  | 0 | 2  | 0 | 0 | 50 | 31  | 18582844 | 6.60E-01 | 1 |
| ARMCX6    | 329999  | NaN  | 8   | 756856  | 207548  | 0 | 2  | 0 | 0 | 50 | 59  | 21254980 | 6.60E-01 | 1 |
| C19orf43  | 1959466 | 226  | 29  | 440372  | 137416  | 0 | 1  | 0 | 0 | 50 | 74  | 23429072 | 6.60E-01 | 1 |
| ASCC2     | 849790  | 182  | 33  | 1981852 | 527948  | 0 | 4  | 2 | 0 | 50 | 83  | 25009356 | 6.60E-01 | 1 |
| NUP205    | 521421  | 326  | 14  | 5206856 | 1424356 | 0 | 21 | 7 | 0 | 39 | 53  | 15819216 | 6.60E-01 | 1 |
| CPNE2     | 745404  | 154  | 48  | 1436816 | 386260  | 0 | 5  | 0 | 0 | 8  | 5   | 2176228  | 6.60E-01 | 1 |
| GLYCTK    | 1113485 | 229  | 49  | 1301536 | 394448  | 0 | 4  | 2 | 0 | 50 | 60  | 20776872 | 6.61E-01 | 1 |
| EFNB2     | 167697  | 1267 | 2   | 856536  | 232824  | 0 | 4  | 2 | 0 | 4  | 5   | 1691356  | 6.61E-01 | 1 |
| DNAJA3    | 753259  | 148  | 40  | 1263444 | 353508  | 0 | 3  | 0 | 0 | 27 | 23  | 10410508 | 6.61E-01 | 1 |
| TTC39A    | 526044  | 281  | 10  | 1587404 | 401212  | 0 | 5  | 1 | 0 | 46 | 69  | 25278136 | 6.61E-01 | 1 |
| GATM      | 465759  | 445  | 4   | 1098616 | 294056  | 0 | 3  | 0 | 0 | 50 | 40  | 18428696 | 6.61E-01 | 1 |
| WT1       | 356326  | 749  | 9   | 1324676 | 373444  | 0 | 3  | 2 | 0 | 50 | 75  | 22939928 | 6.61E-01 | 1 |
| NCR1      | 840563  | 573  | -15 | 786404  | 218584  | 0 | 2  | 0 | 0 | 50 | 100 | 21516284 | 6.61E-01 | 1 |
| MGAT3     | 812764  | 467  | 76  | 1300824 | 413316  | 0 | 3  | 1 | 0 | 19 | 24  | 9501640  | 6.61E-01 | 1 |
| RPS4X     | 374992  | NaN  | 53  | 683876  | 191884  | 0 | 4  | 2 | 0 | 27 | 28  | 5668232  | 6.61E-01 | 1 |
| RASSF2    | 467742  | 485  | 32  | 855112  | 235316  | 0 | 3  | 1 | 0 | 50 | 61  | 20205136 | 6.61E-01 | 1 |
| RAMP3     | 1003768 | 291  | 50  | 377360  | 110716  | 0 | 1  | 0 | 0 | 50 | 66  | 19072700 | 6.61E-01 | 1 |
| ANKRD53   | 380551  | 561  | 27  | 1435392 | 427200  | 0 | 3  | 0 | 0 | 28 | 28  | 13715256 | 6.61E-01 | 1 |
| HIST1H2B1 | 228884  | 634  | 40  | 312568  | 96476   | 0 | 2  | 2 | 0 | 13 | 15  | 2405492  | 6.62E-01 | 1 |
| POLR2B    | 570731  | 443  | 33  | 3074416 | 797084  | 0 | 9  | 1 | 0 | 50 | 47  | 20860532 | 6.62E-01 | 1 |
| KRTAP5-7  | 586193  | 626  | 50  | 417944  | 116056  | 0 | 1  | 0 | 0 | 41 | 39  | 13806036 | 6.62E-01 | 1 |
| OR5AR1    | NaN     | NaN  | NaN | 770740  | 223568  | 0 | 2  | 0 | 0 | 50 | 116 | 39869152 | 6.62E-01 | 1 |
| PEX26     | 516479  | 239  | 27  | 761128  | 240656  | 0 | 2  | 2 | 0 | 28 | 40  | 9045248  | 6.62E-01 | 1 |
| PALB2     | 544239  | 561  | 38  | 3026712 | 827700  | 0 | 14 | 0 | 0 | 0  | 0   | 827700   | 6.62E-01 | 1 |
| ZNF90     | NaN     | NaN  | NaN | 1561772 | 379852  | 0 | 5  | 0 | 0 | 50 | 116 | 40025436 | 6.62E-01 | 1 |



|          |         |      |     |         |         |   |    |   |   |    |     |          |          |   |
|----------|---------|------|-----|---------|---------|---|----|---|---|----|-----|----------|----------|---|
| ZCCHC24  | 334525  | 284  | 46  | 615880  | 172304  | 0 | 1  | 0 | 0 | 50 | 53  | 19904672 | 6.62E-01 | 1 |
| BAG2     | 314024  | 348  | 23  | 543968  | 143824  | 0 | 1  | 0 | 0 | 50 | 46  | 22560076 | 6.62E-01 | 1 |
| RPL10A   | 683460  | 280  | 36  | 573872  | 150232  | 0 | 3  | 1 | 0 | 15 | 26  | 5361716  | 6.62E-01 | 1 |
| FGF3     | 783792  | 561  | 37  | 579212  | 198292  | 0 | 1  | 0 | 0 | 50 | 41  | 18513780 | 6.62E-01 | 1 |
| CD37     | 2183690 | 309  | 30  | 725884  | 207548  | 0 | 2  | 2 | 0 | 4  | 6   | 1626920  | 6.62E-01 | 1 |
| PRAMEF14 | NaN     | NaN  | NaN | 2227848 | 636528  | 0 | 6  | 4 | 0 | 50 | 120 | 40282112 | 6.62E-01 | 1 |
| ZNF679   | NaN     | NaN  | NaN | 1080104 | 259168  | 0 | 3  | 0 | 0 | 50 | 116 | 39904752 | 6.62E-01 | 1 |
| NRBP2    | 2376841 | 247  | 22  | 1323608 | 357424  | 0 | 3  | 0 | 0 | 50 | 67  | 29170640 | 6.63E-01 | 1 |
| MEM200C  | 269994  | 959  | -10 | 1471348 | 525812  | 0 | 4  | 0 | 0 | 3  | 3   | 2312220  | 6.63E-01 | 1 |
| MBOAT2   | 438336  | 469  | 25  | 1363480 | 357068  | 0 | 4  | 0 | 0 | 18 | 20  | 8243892  | 6.63E-01 | 1 |
| DPRX     | 737115  | 684  | -48 | 493772  | 134212  | 0 | 2  | 0 | 0 | 50 | 77  | 17808544 | 6.63E-01 | 1 |
| OR2H2    | 403531  | 798  | 18  | 757212  | 249912  | 0 | 1  | 1 | 0 | 50 | 36  | 17308008 | 6.63E-01 | 1 |
| DOK1     | 1019591 | 315  | 50  | 1188328 | 375224  | 0 | 3  | 2 | 0 | 40 | 63  | 17658668 | 6.63E-01 | 1 |
| CREG2    | 475096  | 278  | 19  | 725884  | 221432  | 0 | 1  | 2 | 0 | 5  | 7   | 2417240  | 6.63E-01 | 1 |
| NSUN4    | 597667  | 255  | 28  | 963692  | 291208  | 0 | 1  | 0 | 0 | 5  | 5   | 2618024  | 6.63E-01 | 1 |
| FCRL3    | 180228  | 829  | 21  | 1873984 | 540764  | 0 | 5  | 3 | 0 | 44 | 38  | 17330080 | 6.63E-01 | 1 |
| FOXD4L1  | 528113  | 595  | 15  | 971524  | 338912  | 0 | 3  | 1 | 0 | 22 | 35  | 8797472  | 6.63E-01 | 1 |
| ZNF254   | 384073  | 1381 | -62 | 1713784 | 413672  | 0 | 7  | 1 | 0 | 22 | 49  | 10308692 | 6.63E-01 | 1 |
| KCNMB2   | 144490  | 882  | -8  | 610540  | 162692  | 0 | 1  | 0 | 0 | 50 | 85  | 30349356 | 6.63E-01 | 1 |
| OR8S1    | 1494035 | 421  | 25  | 875404  | 281240  | 0 | 2  | 1 | 0 | 50 | 75  | 18513780 | 6.63E-01 | 1 |
| TTR      | 294098  | 541  | 20  | 371308  | 115700  | 0 | 1  | 1 | 0 | 12 | 9   | 3640812  | 6.63E-01 | 1 |
| AKAP8    | 494792  | 481  | 28  | 1797088 | 480956  | 0 | 3  | 0 | 0 | 8  | 5   | 3331092  | 6.63E-01 | 1 |
| DPPA5    | 732413  | 446  | 18  | 302956  | 82592   | 0 | 1  | 1 | 0 | 12 | 13  | 3339992  | 6.64E-01 | 1 |
| SEPN1    | 746382  | 372  | 24  | 1504456 | 442508  | 0 | 5  | 0 | 0 | 9  | 10  | 4139924  | 6.64E-01 | 1 |
| USP49    | 429516  | 341  | 40  | 1584556 | 486296  | 0 | 4  | 1 | 0 | 50 | 45  | 22966628 | 6.64E-01 | 1 |
| EPRS     | 630371  | 608  | -8  | 3958364 | 1021720 | 0 | 10 | 2 | 0 | 26 | 31  | 11972280 | 6.64E-01 | 1 |
| SPEF2    | 140884  | 598  | -5  | 4813476 | 1203636 | 0 | 15 | 4 | 0 | 41 | 45  | 18862304 | 6.64E-01 | 1 |
| PPM1E    | 469298  | 448  | 11  | 1913856 | 534000  | 0 | 5  | 3 | 0 | 50 | 70  | 24450436 | 6.64E-01 | 1 |
| POMGNT1  | 908945  | 190  | 29  | 1728024 | 479532  | 0 | 7  | 1 | 0 | 50 | 82  | 25648732 | 6.64E-01 | 1 |
| C5orf24  | 877491  | 696  | 39  | 471344  | 138484  | 0 | 1  | 0 | 0 | 50 | 61  | 24328328 | 6.64E-01 | 1 |
| EBF3     | 85621   | 947  | -28 | 1442868 | 391956  | 0 | 5  | 0 | 0 | 7  | 11  | 3369540  | 6.64E-01 | 1 |
| POLR2J3  | NaN     | NaN  | NaN | 306516  | 84372   | 0 | 1  | 1 | 0 | 26 | 41  | 11661492 | 6.64E-01 | 1 |
| OXGR1    | 111002  | 623  | -10 | 843008  | 244216  | 0 | 2  | 1 | 0 | 37 | 34  | 14099024 | 6.64E-01 | 1 |

|           |         |     |     |         |         |   |    |   |   |    |    |          |          |   |
|-----------|---------|-----|-----|---------|---------|---|----|---|---|----|----|----------|----------|---|
| GPLD1     | 399209  | 465 | 7   | 2225000 | 615880  | 0 | 7  | 1 | 0 | 25 | 24 | 9720580  | 6.64E-01 | 1 |
| YWHAB     | 952219  | 282 | 32  | 652192  | 160556  | 0 | 2  | 0 | 0 | 50 | 67 | 20264944 | 6.65E-01 | 1 |
| PPP1R2    | 762316  | 331 | 42  | 555004  | 126380  | 0 | 1  | 0 | 0 | 50 | 48 | 21214752 | 6.65E-01 | 1 |
| MDM1      | 354120  | 575 | 16  | 1993244 | 533644  | 0 | 8  | 2 | 0 | 8  | 22 | 6123200  | 6.65E-01 | 1 |
| FGFR4     | 1070874 | 201 | 46  | 2060172 | 660024  | 0 | 6  | 2 | 0 | 50 | 65 | 22893292 | 6.65E-01 | 1 |
| OR1L6     | 433740  | 487 | 10  | 766112  | 231400  | 0 | 2  | 2 | 0 | 48 | 44 | 16675396 | 6.65E-01 | 1 |
| STRADB    | 468064  | 491 | 26  | 1096836 | 292632  | 0 | 1  | 1 | 0 | 48 | 56 | 21587840 | 6.65E-01 | 1 |
| CCR7      | 1130946 | 203 | 25  | 946960  | 278036  | 0 | 2  | 2 | 0 | 30 | 44 | 12265624 | 6.65E-01 | 1 |
| NAA25     | 771475  | 200 | 42  | 2566760 | 651124  | 0 | 11 | 1 | 0 | 1  | 2  | 1007124  | 6.65E-01 | 1 |
| OR5K3     | 416592  | 885 | -4  | 808120  | 222500  | 0 | 3  | 2 | 0 | 50 | 71 | 20173096 | 6.65E-01 | 1 |
| GPATCH1   | 420460  | 212 | -7  | 2415816 | 651480  | 0 | 7  | 1 | 0 | 35 | 43 | 14923520 | 6.65E-01 | 1 |
| TAGLN     | 426428  | 228 | 46  | 528660  | 135636  | 0 | 1  | 1 | 0 | 50 | 39 | 17316908 | 6.65E-01 | 1 |
| NUDT3     | 983693  | 233 | 31  | 452832  | 118548  | 0 | 1  | 0 | 0 | 50 | 47 | 19037456 | 6.65E-01 | 1 |
| TRAK1     | 313554  | 321 | 29  | 2727672 | 803136  | 0 | 8  | 2 | 0 | 28 | 37 | 11120728 | 6.65E-01 | 1 |
| BCL2A1    | 234803  | 702 | 28  | 504096  | 128160  | 0 | 1  | 0 | 0 | 50 | 49 | 21774384 | 6.65E-01 | 1 |
| PPP2R1B   | 436031  | 242 | 25  | 1735144 | 495908  | 0 | 5  | 4 | 0 | 38 | 45 | 13909988 | 6.65E-01 | 1 |
| TERF1     | 155308  | 637 | 20  | 1167680 | 282664  | 0 | 3  | 0 | 0 | 50 | 51 | 20402004 | 6.65E-01 | 1 |
| BAZ1A     | 615028  | 184 | 24  | 4060180 | 1039520 | 0 | 9  | 2 | 0 | 20 | 22 | 9450020  | 6.65E-01 | 1 |
| EIF1B     | 195546  | 675 | 10  | 303312  | 74760   | 0 | 1  | 1 | 0 | 22 | 40 | 9855148  | 6.65E-01 | 1 |
| IIST1H2BM | 267617  | 634 | 32  | 314348  | 94696   | 0 | 3  | 2 | 0 | 12 | 20 | 2202928  | 6.66E-01 | 1 |
| SSX7      | 250163  | NaN | 25  | 520828  | 114632  | 0 | 1  | 0 | 0 | 50 | 72 | 24232920 | 6.66E-01 | 1 |
| CTBP2     | 283236  | 508 | 20  | 2453196 | 807408  | 0 | 5  | 2 | 0 | 50 | 58 | 22733092 | 6.66E-01 | 1 |
| HIST1H4F  | 390169  | 544 | 57  | 249912  | 85440   | 0 | 1  | 0 | 0 | 50 | 61 | 13862640 | 6.66E-01 | 1 |
| RARB      | 216662  | 812 | -14 | 1160560 | 307940  | 0 | 5  | 1 | 0 | 50 | 80 | 20997236 | 6.66E-01 | 1 |
| SPACA1    | 176962  | 684 | 32  | 761128  | 209684  | 0 | 2  | 1 | 0 | 29 | 42 | 13500944 | 6.66E-01 | 1 |
| SH3YL1    | 304765  | 624 | -18 | 891780  | 248844  | 0 | 2  | 1 | 0 | 50 | 45 | 17740904 | 6.66E-01 | 1 |
| CXorf65   | 759088  | NaN | 27  | 492348  | 120684  | 0 | 1  | 0 | 0 | 50 | 74 | 25911460 | 6.66E-01 | 1 |
| NMT2      | 236087  | 620 | 23  | 1311504 | 336420  | 0 | 4  | 0 | 0 | 15 | 13 | 5818108  | 6.66E-01 | 1 |
| NIT1      | 689033  | 250 | 23  | 975440  | 299752  | 0 | 2  | 1 | 0 | 50 | 68 | 19070564 | 6.66E-01 | 1 |
| PYGO2     | 1612870 | 224 | 35  | 987544  | 325028  | 0 | 3  | 1 | 0 | 50 | 56 | 18488504 | 6.66E-01 | 1 |
| INSL5     | 335045  | 692 | -16 | 348880  | 93272   | 0 | 1  | 1 | 0 | 50 | 58 | 17879032 | 6.66E-01 | 1 |
| GRIK4     | 298412  | 678 | 31  | 2444652 | 698472  | 0 | 7  | 3 | 0 | 24 | 21 | 9953760  | 6.66E-01 | 1 |
| CALCA     | 344274  | 627 | -9  | 501248  | 143824  | 0 | 1  | 0 | 0 | 50 | 38 | 17139264 | 6.66E-01 | 1 |

|          |         |      |     |         |        |   |    |   |   |    |     |          |          |   |
|----------|---------|------|-----|---------|--------|---|----|---|---|----|-----|----------|----------|---|
| WDR36    | 205349  | 738  | 6   | 2471708 | 672484 | 0 | 13 | 0 | 0 | 0  | 0   | 672484   | 6.67E-01 | 1 |
| QRFPR    | 268761  | 809  | -2  | 1102532 | 302956 | 0 | 3  | 1 | 0 | 50 | 50  | 19637316 | 6.67E-01 | 1 |
| CHRNA9   | 442913  | 347  | 53  | 1226064 | 331080 | 0 | 2  | 2 | 0 | 50 | 52  | 18993668 | 6.67E-01 | 1 |
| OR2L8    | 27938   | 1015 | -28 | 771808  | 231044 | 0 | 4  | 1 | 0 | 50 | 127 | 24860904 | 6.67E-01 | 1 |
| TRPS1    | 55597   | 711  | -10 | 3274844 | 895696 | 0 | 14 | 4 | 0 | 17 | 46  | 14581404 | 6.67E-01 | 1 |
| C7orf43  | 1299015 | 205  | 52  | 1429340 | 474904 | 0 | 4  | 2 | 0 | 35 | 32  | 12810304 | 6.67E-01 | 1 |
| IGDCC4   | 642731  | 280  | 45  | 3094352 | 995020 | 0 | 6  | 1 | 0 | 3  | 2   | 2328952  | 6.67E-01 | 1 |
| OR51G2   | 65798   | 1006 | -15 | 765044  | 244216 | 0 | 5  | 3 | 0 | 7  | 10  | 2021012  | 6.67E-01 | 1 |
| IFNAR2   | 861800  | 317  | 87  | 1479180 | 383412 | 0 | 2  | 0 | 0 | 17 | 15  | 7867956  | 6.67E-01 | 1 |
| GLUL     | 349818  | 783  | 5   | 968320  | 255608 | 0 | 3  | 1 | 0 | 20 | 31  | 10297300 | 6.67E-01 | 1 |
| ARHGFB1  | 613770  | 308  | 30  | 2964412 | 878252 | 0 | 7  | 1 | 0 | 50 | 52  | 21930312 | 6.67E-01 | 1 |
| SLC38A6  | 220020  | 527  | -2  | 1447852 | 383768 | 0 | 2  | 1 | 0 | 35 | 35  | 13922448 | 6.68E-01 | 1 |
| EIF3J    | 667670  | 534  | 30  | 697760  | 161980 | 0 | 2  | 0 | 0 | 50 | 70  | 23140000 | 6.68E-01 | 1 |
| GPR55    | 1020678 | 519  | 45  | 796016  | 229264 | 0 | 2  | 1 | 0 | 50 | 73  | 27243968 | 6.68E-01 | 1 |
| TAT      | 446645  | 530  | 10  | 1181208 | 323604 | 0 | 2  | 1 | 0 | 50 | 64  | 19453620 | 6.68E-01 | 1 |
| CCNYL1   | 330620  | 210  | 26  | 951588  | 240300 | 0 | 2  | 0 | 0 | 50 | 51  | 23774392 | 6.68E-01 | 1 |
| ATP1A1   | 616485  | 464  | 18  | 2652200 | 737632 | 0 | 9  | 1 | 0 | 19 | 20  | 8006440  | 6.68E-01 | 1 |
| KRTAP4-4 | 996799  | 468  | -7  | 430760  | 106444 | 0 | 1  | 1 | 0 | 50 | 60  | 17141400 | 6.68E-01 | 1 |
| MEM150C  | 712807  | 493  | 17  | 654684  | 176220 | 0 | 2  | 1 | 0 | 50 | 53  | 16909288 | 6.68E-01 | 1 |
| OR2K2    | 348469  | 501  | 19  | 775724  | 238876 | 0 | 2  | 0 | 0 | 31 | 45  | 15250684 | 6.68E-01 | 1 |
| WDR34    | 1891397 | 197  | 41  | 1335356 | 423640 | 0 | 2  | 2 | 0 | 50 | 54  | 22151388 | 6.68E-01 | 1 |
| IL15     | 74660   | 679  | 5   | 446068  | 101816 | 0 | 1  | 0 | 0 | 50 | 62  | 23746980 | 6.68E-01 | 1 |
| ZNF461   | 627070  | 922  | -29 | 1489860 | 338556 | 0 | 5  | 2 | 0 | 50 | 70  | 18261376 | 6.68E-01 | 1 |
| CARD11   | 635400  | 558  | 24  | 2982924 | 815952 | 0 | 8  | 3 | 0 | 50 | 65  | 21272780 | 6.68E-01 | 1 |
| OR8G5    | 154391  | 921  | -14 | 860452  | 250268 | 0 | 3  | 0 | 0 | 50 | 57  | 19362484 | 6.68E-01 | 1 |
| RCSD1    | 520615  | 405  | 14  | 1051268 | 310432 | 0 | 3  | 0 | 0 | 7  | 11  | 3336076  | 6.69E-01 | 1 |
| ZC3H14   | 169650  | 686  | -1  | 2259888 | 583128 | 0 | 9  | 1 | 0 | 27 | 32  | 12385952 | 6.69E-01 | 1 |
| NUDT21   | 504003  | 442  | 5   | 597012  | 159132 | 0 | 1  | 0 | 0 | 50 | 53  | 21046364 | 6.69E-01 | 1 |
| PSMD3    | 1652518 | 216  | 28  | 1369176 | 391956 | 0 | 5  | 2 | 0 | 50 | 67  | 22696068 | 6.69E-01 | 1 |
| NIPAL1   | 225089  | 474  | 38  | 1037028 | 303312 | 0 | 2  | 0 | 0 | 43 | 74  | 19036032 | 6.69E-01 | 1 |
| PGBD5    | 286328  | 478  | 10  | 1171596 | 317196 | 0 | 3  | 1 | 0 | 50 | 48  | 22392044 | 6.69E-01 | 1 |
| P4HA1    | 539936  | 354  | 44  | 1475976 | 378072 | 0 | 4  | 0 | 0 | 9  | 9   | 3435756  | 6.69E-01 | 1 |
| HS2ST1   | 332598  | 515  | 0   | 938060  | 233536 | 0 | 3  | 1 | 0 | 50 | 74  | 21718136 | 6.69E-01 | 1 |

|          |         |      |     |         |         |   |    |   |   |    |     |          |          |   |
|----------|---------|------|-----|---------|---------|---|----|---|---|----|-----|----------|----------|---|
| ATG4D    | 2036812 | 226  | 23  | 1195448 | 367036  | 0 | 7  | 3 | 0 | 24 | 50  | 10294452 | 6.69E-01 | 1 |
| ARSI     | 954044  | 220  | 46  | 1393028 | 437524  | 0 | 2  | 2 | 0 | 11 | 10  | 4811340  | 6.69E-01 | 1 |
| OR9G4    | 384896  | 828  | -34 | 803848  | 245996  | 0 | 3  | 0 | 0 | 50 | 70  | 19076260 | 6.69E-01 | 1 |
| ATF7IP   | 339265  | 882  | 12  | 3191540 | 940552  | 0 | 12 | 2 | 0 | 20 | 25  | 7326836  | 6.69E-01 | 1 |
| FOXF1    | 70370   | 416  | 3   | 931296  | 292632  | 0 | 2  | 1 | 0 | 50 | 39  | 17333284 | 6.69E-01 | 1 |
| EFNA5    | 78424   | 628  | 21  | 596656  | 154148  | 0 | 1  | 0 | 0 | 50 | 47  | 21193036 | 6.69E-01 | 1 |
| CDC25A   | 1116598 | 151  | 36  | 1375940 | 365968  | 0 | 4  | 1 | 0 | 50 | 69  | 23782580 | 6.70E-01 | 1 |
| GYG1     | 356219  | 442  | 8   | 997156  | 219296  | 0 | 3  | 2 | 0 | 18 | 24  | 5782864  | 6.70E-01 | 1 |
| PLAGL2   | 1071799 | 262  | 51  | 1219656 | 377004  | 0 | 5  | 0 | 0 | 5  | 3   | 1539344  | 6.70E-01 | 1 |
| KLHDC7B  | 1075525 | 207  | 42  | 1397656 | 508724  | 0 | 4  | 2 | 0 | 42 | 47  | 16742324 | 6.70E-01 | 1 |
| RECQL5   | 1912060 | 198  | 37  | 2596664 | 751516  | 0 | 9  | 1 | 0 | 30 | 41  | 14104364 | 6.70E-01 | 1 |
| FN3K     | 783773  | 243  | 18  | 789964  | 226772  | 0 | 2  | 1 | 0 | 50 | 50  | 19020012 | 6.70E-01 | 1 |
| TLR10    | 304012  | 437  | 42  | 2060528 | 545392  | 0 | 9  | 1 | 0 | 50 | 77  | 23183788 | 6.70E-01 | 1 |
| EDEM1    | 260923  | 447  | 14  | 1674624 | 480600  | 0 | 4  | 2 | 0 | 50 | 53  | 20200864 | 6.70E-01 | 1 |
| LMLN     | 607598  | 410  | 30  | 1808480 | 482380  | 0 | 6  | 1 | 0 | 50 | 49  | 18579640 | 6.70E-01 | 1 |
| DCDC2B   | 1460758 | 218  | 29  | 880744  | 274832  | 0 | 2  | 1 | 0 | 50 | 52  | 21684672 | 6.70E-01 | 1 |
| C7orf31  | 254281  | 319  | 21  | 1537208 | 394804  | 0 | 3  | 0 | 0 | 9  | 5   | 4251708  | 6.70E-01 | 1 |
| ANGPT2   | NaN     | NaN  | NaN | 1315064 | 311500  | 0 | 2  | 1 | 0 | 50 | 117 | 39957084 | 6.70E-01 | 1 |
| PRM2     | 632841  | 308  | 37  | 263440  | 70844   | 0 | 1  | 1 | 0 | 9  | 8   | 2023504  | 6.70E-01 | 1 |
| GTF3C1   | 282478  | 597  | 25  | 5404792 | 1511576 | 0 | 15 | 6 | 0 | 31 | 37  | 16508076 | 6.70E-01 | 1 |
| KL       | 209854  | 595  | 23  | 2533296 | 731580  | 0 | 7  | 2 | 0 | 50 | 49  | 21487092 | 6.70E-01 | 1 |
| EFNB1    | 141847  | NaN  | 19  | 870420  | 258456  | 0 | 2  | 1 | 0 | 50 | 48  | 16561476 | 6.71E-01 | 1 |
| KRTAP3-2 | 977588  | 404  | 10  | 244572  | 74760   | 0 | 1  | 0 | 0 | 50 | 68  | 14276668 | 6.71E-01 | 1 |
| HLA-DQA1 | 1292851 | 535  | 17  | 651480  | 187968  | 0 | 2  | 0 | 0 | 50 | 68  | 20377084 | 6.71E-01 | 1 |
| GPR63    | 130400  | 1336 | -5  | 1036672 | 309008  | 0 | 2  | 0 | 0 | 50 | 40  | 20137852 | 6.71E-01 | 1 |
| RANBP1   | 503106  | 277  | 64  | 539340  | 129228  | 0 | 1  | 0 | 0 | 50 | 40  | 17277036 | 6.71E-01 | 1 |
| C1orf52  | 348743  | 384  | 3   | 475260  | 121752  | 0 | 1  | 0 | 0 | 50 | 52  | 20151380 | 6.71E-01 | 1 |
| C9orf131 | 782447  | 350  | 42  | 2656828 | 826988  | 0 | 6  | 3 | 0 | 36 | 48  | 20387764 | 6.71E-01 | 1 |
| OR5D13   | 4183    | 1091 | -36 | 781776  | 226416  | 0 | 4  | 2 | 0 | 14 | 26  | 3895352  | 6.71E-01 | 1 |
| INSL6    | 351963  | 629  | 20  | 547172  | 147028  | 0 | 1  | 0 | 0 | 50 | 54  | 20206204 | 6.71E-01 | 1 |
| MPG      | 1005761 | 238  | 36  | 761128  | 241724  | 0 | 2  | 0 | 0 | 50 | 46  | 16624132 | 6.71E-01 | 1 |
| CCDC155  | 2178574 | 290  | 37  | 1457108 | 427912  | 0 | 4  | 2 | 0 | 50 | 53  | 21503468 | 6.71E-01 | 1 |
| MIA      | 1127178 | 201  | 27  | 337488  | 100392  | 0 | 1  | 0 | 0 | 50 | 68  | 19652268 | 6.71E-01 | 1 |

|         |         |      |     |         |        |   |    |   |   |    |     |          |          |   |
|---------|---------|------|-----|---------|--------|---|----|---|---|----|-----|----------|----------|---|
| IGFBPL1 | 234360  | 688  | 16  | 676400  | 236740 | 0 | 2  | 0 | 0 | 50 | 56  | 18543328 | 6.71E-01 | 1 |
| TOR1A   | 600401  | 187  | 44  | 857604  | 228552 | 0 | 2  | 2 | 0 | 13 | 24  | 6188704  | 6.71E-01 | 1 |
| RING1   | 1474628 | 377  | 24  | 1003208 | 326452 | 0 | 2  | 1 | 0 | 50 | 90  | 23548688 | 6.72E-01 | 1 |
| OR56A4  | 432250  | 877  | -13 | 893916  | 276612 | 0 | 3  | 2 | 0 | 50 | 63  | 18144964 | 6.72E-01 | 1 |
| IQCF1   | 1013177 | 370  | 39  | 526880  | 150232 | 0 | 2  | 0 | 0 | 50 | 85  | 19762272 | 6.72E-01 | 1 |
| ABHD4   | 975314  | 380  | 49  | 876116  | 250624 | 0 | 1  | 0 | 0 | 50 | 81  | 24089452 | 6.72E-01 | 1 |
| KCNB2   | 110047  | 904  | -11 | 2278756 | 651836 | 0 | 15 | 6 | 0 | 7  | 15  | 3783924  | 6.72E-01 | 1 |
| CBWD1   | 230380  | 398  | -4  | 1110364 | 273764 | 0 | 2  | 1 | 0 | 50 | 40  | 20962704 | 6.72E-01 | 1 |
| GNA15   | 908206  | 241  | 21  | 964048  | 263084 | 0 | 3  | 1 | 0 | 50 | 56  | 18551872 | 6.72E-01 | 1 |
| CASC1   | 255116  | 633  | 18  | 2057324 | 516556 | 0 | 7  | 0 | 0 | 2  | 1   | 954436   | 6.72E-01 | 1 |
| CNGB3   | 191008  | 1171 | 2   | 2114996 | 555004 | 0 | 6  | 2 | 0 | 50 | 41  | 16639796 | 6.72E-01 | 1 |
| HSPB7   | 886121  | 197  | 43  | 424352  | 132076 | 0 | 1  | 0 | 0 | 50 | 55  | 20099048 | 6.72E-01 | 1 |
| CD300LF | NaN     | NaN  | NaN | 746888  | 212176 | 0 | 2  | 1 | 0 | 50 | 117 | 39857760 | 6.72E-01 | 1 |
| NDRG4   | 678092  | 320  | 0   | 1032756 | 287292 | 0 | 3  | 1 | 0 | 50 | 61  | 20996880 | 6.72E-01 | 1 |
| NOL11   | 692622  | 197  | 7   | 1887512 | 494128 | 0 | 5  | 1 | 0 | 50 | 62  | 21309448 | 6.72E-01 | 1 |
| LMBR1   | 338947  | 615  | 6   | 1290500 | 351016 | 0 | 5  | 0 | 0 | 50 | 62  | 19739132 | 6.72E-01 | 1 |
| PITPNB  | 112113  | 310  | -54 | 753296  | 167320 | 0 | 1  | 0 | 0 | 50 | 84  | 21168828 | 6.72E-01 | 1 |
| DGKE    | 320339  | 324  | -38 | 1474196 | 392668 | 0 | 7  | 1 | 0 | 50 | 92  | 24556168 | 6.72E-01 | 1 |
| FAM3B   | 224593  | 506  | 24  | 626916  | 159132 | 0 | 1  | 0 | 0 | 50 | 51  | 19918200 | 6.73E-01 | 1 |
| CRYZ    | 103167  | 1070 | -17 | 852976  | 238520 | 0 | 2  | 0 | 0 | 50 | 58  | 23167768 | 6.73E-01 | 1 |
| ZMYM1   | 767910  | 390  | 22  | 2955512 | 745108 | 0 | 9  | 3 | 0 | 50 | 94  | 32507784 | 6.73E-01 | 1 |
| PRR22   | 990266  | 225  | 26  | 1018160 | 347812 | 0 | 3  | 0 | 0 | 28 | 33  | 11164872 | 6.73E-01 | 1 |
| SCG5    | 244857  | 383  | 1   | 555004  | 148808 | 0 | 1  | 0 | 0 | 50 | 53  | 26379956 | 6.73E-01 | 1 |
| UBTF    | 930750  | 175  | 41  | 2054120 | 482380 | 0 | 7  | 1 | 0 | 43 | 57  | 18154220 | 6.73E-01 | 1 |
| TAS2R30 | 371136  | 676  | 4   | 795660  | 229620 | 0 | 2  | 0 | 0 | 50 | 58  | 20325464 | 6.73E-01 | 1 |
| MEP1B   | 342655  | 617  | 11  | 1841232 | 469920 | 0 | 5  | 1 | 0 | 8  | 10  | 3854412  | 6.73E-01 | 1 |
| PDCL3   | 235908  | 579  | 9   | 632612  | 157708 | 0 | 1  | 0 | 0 | 50 | 47  | 22759792 | 6.73E-01 | 1 |
| ZFP91   | 284768  | 644  | 2   | 1466008 | 406196 | 0 | 2  | 0 | 0 | 50 | 42  | 18244644 | 6.73E-01 | 1 |
| CPSF2   | 337384  | 415  | 29  | 2042016 | 526524 | 0 | 2  | 1 | 0 | 50 | 56  | 24697500 | 6.73E-01 | 1 |
| IRAK2   | 744536  | 224  | 49  | 1602712 | 456392 | 0 | 4  | 1 | 0 | 50 | 61  | 20524112 | 6.73E-01 | 1 |
| PDZRN3  | 82249   | 888  | -7  | 2693852 | 765400 | 0 | 8  | 1 | 0 | 39 | 49  | 20806776 | 6.73E-01 | 1 |
| MBTPS2  | 93093   | NaN  | 16  | 1322184 | 386616 | 0 | 2  | 0 | 0 | 45 | 47  | 18140336 | 6.73E-01 | 1 |
| ZNF585B | 248427  | 984  | -56 | 1983632 | 496264 | 0 | 7  | 2 | 0 | 50 | 47  | 18194092 | 6.73E-01 | 1 |

|          |         |      |     |         |        |   |    |   |   |    |     |          |          |   |
|----------|---------|------|-----|---------|--------|---|----|---|---|----|-----|----------|----------|---|
| FAM129C  | 961640  | 206  | 42  | 1830196 | 593096 | 0 | 3  | 1 | 0 | 21 | 19  | 8583160  | 6.73E-01 | 1 |
| CHST4    | 443039  | 600  | 18  | 965116  | 279104 | 0 | 4  | 1 | 0 | 50 | 67  | 18330440 | 6.73E-01 | 1 |
| DENND3   | 360825  | 204  | 51  | 3087588 | 847992 | 0 | 7  | 5 | 0 | 31 | 27  | 11628740 | 6.73E-01 | 1 |
| GPRC5A   | 719556  | 169  | 17  | 889288  | 270560 | 0 | 2  | 1 | 0 | 50 | 52  | 20692856 | 6.73E-01 | 1 |
| BCL7B    | 955146  | 171  | 48  | 522608  | 149164 | 0 | 1  | 0 | 0 | 50 | 59  | 22598168 | 6.73E-01 | 1 |
| VAV3     | 132139  | 554  | -11 | 2297980 | 558920 | 0 | 6  | 1 | 0 | 29 | 37  | 14181972 | 6.74E-01 | 1 |
| MAOA     | 62832   | NaN  | 13  | 1383060 | 368460 | 0 | 4  | 1 | 0 | 25 | 33  | 12611300 | 6.74E-01 | 1 |
| BRD4     | 557083  | 381  | 20  | 3473848 | 988256 | 0 | 10 | 4 | 0 | 50 | 56  | 21965556 | 6.74E-01 | 1 |
| CCDC38   | 396472  | 400  | 6   | 1517628 | 355644 | 0 | 5  | 1 | 0 | 50 | 64  | 23039608 | 6.74E-01 | 1 |
| SPIN4    | 90301   | NaN  | -19 | 620864  | 180136 | 0 | 2  | 1 | 0 | 50 | 84  | 21849144 | 6.74E-01 | 1 |
| LMBRD2   | 174910  | 599  | -4  | 1839808 | 462800 | 0 | 5  | 2 | 0 | 50 | 57  | 22147116 | 6.74E-01 | 1 |
| FANCF    | 52076   | 970  | -4  | 902816  | 300820 | 0 | 3  | 1 | 0 | 50 | 84  | 18756928 | 6.74E-01 | 1 |
| C21orf91 | 113501  | 686  | 26  | 784624  | 187256 | 0 | 2  | 1 | 0 | 50 | 126 | 46192068 | 6.74E-01 | 1 |
| CD40LG   | 314961  | NaN  | 37  | 685300  | 173372 | 0 | 2  | 0 | 0 | 50 | 62  | 19178788 | 6.74E-01 | 1 |
| OR2A1    | NaN     | NaN  | NaN | 750448  | 243860 | 0 | 2  | 1 | 0 | 50 | 117 | 39889444 | 6.74E-01 | 1 |
| RAB30    | 307557  | 285  | 13  | 531864  | 138840 | 0 | 1  | 0 | 0 | 50 | 41  | 19709228 | 6.74E-01 | 1 |
| NUMB     | 567659  | 180  | 41  | 1647924 | 483804 | 0 | 3  | 1 | 0 | 50 | 55  | 20651916 | 6.74E-01 | 1 |
| RNASE7   | 937278  | 320  | 20  | 397296  | 110004 | 0 | 1  | 0 | 0 | 50 | 63  | 19474980 | 6.74E-01 | 1 |
| OR2W1    | 155147  | 738  | 1   | 799220  | 229264 | 0 | 4  | 1 | 0 | 4  | 3   | 1290500  | 6.74E-01 | 1 |
| HMG20B   | 2160126 | 269  | 39  | 828768  | 228552 | 0 | 3  | 0 | 0 | 50 | 60  | 21798948 | 6.74E-01 | 1 |
| CRYGN    | 612907  | 196  | 36  | 483448  | 119972 | 0 | 1  | 0 | 0 | 50 | 52  | 21833836 | 6.74E-01 | 1 |
| KRTAP3-1 | 977588  | 404  | 10  | 247064  | 72268  | 0 | 1  | 0 | 0 | 50 | 68  | 14276668 | 6.74E-01 | 1 |
| FAM63B   | 524797  | 311  | 28  | 1585624 | 441440 | 0 | 4  | 0 | 0 | 13 | 16  | 5646872  | 6.74E-01 | 1 |
| MMADHC   | 102377  | 521  | 1   | 775724  | 205768 | 0 | 2  | 0 | 0 | 50 | 55  | 21361424 | 6.74E-01 | 1 |
| LIX1     | 382123  | 614  | 38  | 732292  | 195800 | 0 | 2  | 0 | 0 | 50 | 67  | 23046728 | 6.74E-01 | 1 |
| GRB10    | 185646  | 602  | -4  | 1561060 | 411536 | 0 | 4  | 1 | 0 | 50 | 50  | 20416244 | 6.75E-01 | 1 |
| DSG3     | 275713  | 450  | -18 | 2522972 | 745108 | 0 | 6  | 1 | 0 | 27 | 25  | 8036700  | 6.75E-01 | 1 |
| MVD      | 802673  | 189  | 41  | 1009616 | 315772 | 0 | 3  | 1 | 0 | 50 | 65  | 20750172 | 6.75E-01 | 1 |
| LRRC4C   | 4203    | 1185 | -34 | 1584200 | 473836 | 0 | 7  | 2 | 0 | 16 | 25  | 5675352  | 6.75E-01 | 1 |
| DUSP18   | 723012  | 330  | 56  | 475972  | 133856 | 0 | 1  | 0 | 0 | 50 | 37  | 15331496 | 6.75E-01 | 1 |
| SMARCC2  | 2878044 | 171  | 40  | 3207560 | 904240 | 0 | 15 | 2 | 0 | 4  | 7   | 2028132  | 6.75E-01 | 1 |
| DHRS11   | 468055  | 548  | 23  | 665008  | 196868 | 0 | 2  | 1 | 0 | 50 | 60  | 18803564 | 6.75E-01 | 1 |
| UGT3A2   | 173490  | 614  | -9  | 1340340 | 364188 | 0 | 6  | 2 | 0 | 6  | 8   | 2537924  | 6.75E-01 | 1 |

|          |         |      |     |         |        |   |    |   |   |    |     |          |          |   |
|----------|---------|------|-----|---------|--------|---|----|---|---|----|-----|----------|----------|---|
| SPOCK1   | 216344  | 646  | 26  | 1161272 | 289072 | 0 | 3  | 0 | 0 | 46 | 45  | 17127160 | 6.75E-01 | 1 |
| OSBP2    | 752472  | 303  | 37  | 2315780 | 677824 | 0 | 5  | 2 | 0 | 5  | 9   | 4714864  | 6.75E-01 | 1 |
| AKNAD1   | 801073  | 236  | 8   | 2185840 | 556784 | 0 | 11 | 4 | 0 | 50 | 68  | 20779720 | 6.75E-01 | 1 |
| STIM2    | 116073  | 934  | 37  | 1987904 | 528304 | 0 | 3  | 2 | 0 | 50 | 66  | 21682180 | 6.75E-01 | 1 |
| VGLL4    | 186722  | 488  | 35  | 829480  | 237452 | 0 | 3  | 0 | 0 | 3  | 7   | 1809548  | 6.75E-01 | 1 |
| TXN2     | 1199592 | 195  | 21  | 419724  | 126024 | 0 | 1  | 0 | 0 | 50 | 59  | 21111868 | 6.75E-01 | 1 |
| MMP13    | 374035  | 482  | -10 | 1239236 | 313636 | 0 | 3  | 1 | 0 | 50 | 62  | 25006508 | 6.75E-01 | 1 |
| ARMC4    | 125789  | 454  | -4  | 2694208 | 735140 | 0 | 7  | 3 | 0 | 50 | 62  | 22808208 | 6.75E-01 | 1 |
| CTPS2    | 295447  | NaN  | 30  | 1557500 | 400144 | 0 | 2  | 1 | 0 | 50 | 57  | 22686812 | 6.75E-01 | 1 |
| MRPL54   | 2144458 | 206  | 34  | 354576  | 101460 | 0 | 1  | 0 | 0 | 50 | 63  | 19224000 | 6.75E-01 | 1 |
| NPFFR1   | 552278  | 225  | 44  | 1051980 | 342828 | 0 | 2  | 0 | 0 | 50 | 43  | 19472844 | 6.75E-01 | 1 |
| TEF      | 1407073 | 187  | 64  | 816308  | 246352 | 0 | 2  | 1 | 0 | 50 | 53  | 18994380 | 6.75E-01 | 1 |
| ISG20L2  | 1851672 | 180  | 37  | 886084  | 256676 | 0 | 3  | 0 | 0 | 50 | 84  | 23475352 | 6.75E-01 | 1 |
| MDH1B    | 206970  | 816  | 1   | 1356716 | 355288 | 0 | 5  | 1 | 0 | 50 | 64  | 21632340 | 6.75E-01 | 1 |
| RET      | 454068  | 563  | -19 | 2839100 | 846568 | 0 | 9  | 1 | 0 | 21 | 24  | 8752616  | 6.75E-01 | 1 |
| MS4A12   | 333232  | 899  | 13  | 686368  | 197936 | 0 | 2  | 0 | 0 | 50 | 69  | 19779360 | 6.75E-01 | 1 |
| PPP4C    | NaN     | NaN  | NaN | 804560  | 216448 | 0 | 2  | 1 | 0 | 50 | 117 | 39862032 | 6.75E-01 | 1 |
| POTEH    | 66885   | 909  | -64 | 1444292 | 348880 | 0 | 5  | 2 | 0 | 50 | 75  | 22229352 | 6.75E-01 | 1 |
| AADACL2  | 91028   | 611  | -5  | 1025636 | 279460 | 0 | 2  | 0 | 0 | 27 | 26  | 13265272 | 6.76E-01 | 1 |
| PLA2G12E | 587592  | 291  | 43  | 508012  | 134924 | 0 | 1  | 0 | 0 | 50 | 52  | 22573248 | 6.76E-01 | 1 |
| POLK     | 253484  | 500  | 54  | 2295132 | 555360 | 0 | 10 | 2 | 0 | 25 | 32  | 10469960 | 6.76E-01 | 1 |
| LRRC43   | 808864  | 187  | 12  | 1645788 | 510504 | 0 | 6  | 1 | 0 | 50 | 65  | 20660104 | 6.76E-01 | 1 |
| SLC16A6  | 764688  | 237  | 11  | 1315776 | 384480 | 0 | 4  | 2 | 0 | 50 | 65  | 21730952 | 6.76E-01 | 1 |
| NUDT4    | 416655  | 419  | 18  | 471700  | 128516 | 0 | 1  | 0 | 0 | 50 | 48  | 19395236 | 6.76E-01 | 1 |
| ASTE1    | 313779  | 586  | 19  | 1736924 | 458884 | 0 | 3  | 0 | 0 | 48 | 41  | 27620616 | 6.76E-01 | 1 |
| CBLN2    | 12878   | 1030 | -35 | 551088  | 178356 | 0 | 2  | 1 | 0 | 7  | 9   | 2527244  | 6.76E-01 | 1 |
| XPNPEP3  | 969480  | 269  | 43  | 1306876 | 361340 | 0 | 2  | 0 | 0 | 11 | 8   | 5825940  | 6.76E-01 | 1 |
| OVCH2    | 97859   | 823  | 0   | 1479892 | 389108 | 0 | 2  | 0 | 0 | 50 | 60  | 22175240 | 6.76E-01 | 1 |
| FBXO36   | 352105  | 601  | 28  | 488788  | 131720 | 0 | 1  | 0 | 0 | 50 | 56  | 24268520 | 6.76E-01 | 1 |
| ORM2     | 206775  | 425  | 4   | 532932  | 135636 | 0 | 1  | 1 | 0 | 22 | 16  | 8233568  | 6.76E-01 | 1 |
| SLC7A1   | 222765  | 467  | 9   | 1584200 | 481312 | 0 | 8  | 4 | 0 | 17 | 23  | 6093652  | 6.76E-01 | 1 |
| VPREB1   | 433352  | 612  | 35  | 370596  | 103596 | 0 | 1  | 0 | 0 | 50 | 68  | 22190548 | 6.76E-01 | 1 |
| STUB1    | 1207790 | 194  | 33  | 794948  | 206836 | 0 | 3  | 2 | 0 | 36 | 64  | 16344316 | 6.76E-01 | 1 |

|          |         |      |     |         |        |   |    |   |   |    |     |          |          |   |
|----------|---------|------|-----|---------|--------|---|----|---|---|----|-----|----------|----------|---|
| C10orf54 | NaN     | NaN  | NaN | 784268  | 241012 | 0 | 2  | 0 | 0 | 50 | 116 | 39886596 | 6.77E-01 | 1 |
| YTHDF3   | 137401  | 619  | 7   | 1489860 | 403704 | 0 | 2  | 1 | 0 | 50 | 53  | 20427280 | 6.77E-01 | 1 |
| EPS8L1   | 1125216 | 432  | -26 | 1880392 | 576008 | 0 | 4  | 1 | 0 | 32 | 39  | 14270616 | 6.77E-01 | 1 |
| SRP72    | 662749  | 594  | 27  | 1778576 | 453544 | 0 | 6  | 1 | 0 | 50 | 64  | 23234340 | 6.77E-01 | 1 |
| F2RL3    | 901964  | 305  | 31  | 892848  | 348168 | 0 | 3  | 2 | 0 | 50 | 87  | 22448292 | 6.77E-01 | 1 |
| SULT1C2  | 361432  | 609  | -10 | 880388  | 206836 | 0 | 2  | 0 | 0 | 50 | 35  | 14338612 | 6.77E-01 | 1 |
| SIGLEC12 | 360870  | 583  | -4  | 1546108 | 473480 | 0 | 7  | 2 | 0 | 10 | 11  | 3776804  | 6.77E-01 | 1 |
| SNRK     | 153482  | 399  | 30  | 1924180 | 547172 | 0 | 3  | 2 | 0 | 17 | 19  | 9931688  | 6.77E-01 | 1 |
| SMYD2    | 465993  | 505  | -11 | 1159136 | 280528 | 0 | 2  | 1 | 0 | 50 | 70  | 23026792 | 6.77E-01 | 1 |
| PLCG2    | 217457  | 451  | 36  | 3359572 | 833396 | 0 | 7  | 2 | 0 | 49 | 63  | 22812480 | 6.77E-01 | 1 |
| CLCA4    | 279475  | 692  | -14 | 2363840 | 641512 | 0 | 10 | 1 | 0 | 16 | 16  | 4428284  | 6.77E-01 | 1 |
| WNT3     | 522194  | 254  | 23  | 899968  | 257744 | 0 | 1  | 1 | 0 | 50 | 54  | 16440080 | 6.77E-01 | 1 |
| MKNK1    | 608423  | 266  | 25  | 1220012 | 324316 | 0 | 4  | 1 | 0 | 50 | 58  | 19047424 | 6.77E-01 | 1 |
| TOP2A    | 1220026 | 191  | 23  | 4061604 | 992172 | 0 | 11 | 0 | 0 | 1  | 0   | 1247780  | 6.78E-01 | 1 |
| SMAP2    | 718633  | 438  | 37  | 1123180 | 295124 | 0 | 2  | 0 | 0 | 14 | 24  | 7644744  | 6.78E-01 | 1 |
| FOXN2    | 254318  | 752  | 23  | 1108940 | 296548 | 0 | 8  | 4 | 0 | 3  | 8   | 1333220  | 6.78E-01 | 1 |
| SYT10    | 93167   | 905  | -41 | 1340696 | 363832 | 0 | 7  | 4 | 0 | 14 | 25  | 3398732  | 6.78E-01 | 1 |
| OR1F1    | 1493009 | 253  | 42  | 765044  | 236740 | 0 | 2  | 1 | 0 | 50 | 77  | 26841332 | 6.78E-01 | 1 |
| PAQR7    | 746382  | 372  | 24  | 849060  | 267000 | 0 | 3  | 2 | 0 | 21 | 28  | 9671096  | 6.78E-01 | 1 |
| WRAP53   | 2068255 | 213  | 31  | 1393028 | 414028 | 0 | 4  | 0 | 0 | 2  | 0   | 803848   | 6.78E-01 | 1 |
| ZNF600   | 536540  | 1010 | -40 | 1866508 | 456392 | 0 | 13 | 1 | 0 | 2  | 6   | 1314352  | 6.78E-01 | 1 |
| KRTAP4-7 | NaN     | NaN  | NaN | 395872  | 103952 | 0 | 1  | 0 | 0 | 50 | 116 | 39749536 | 6.78E-01 | 1 |
| SLC7A6OS | 819579  | 281  | 46  | 795304  | 219296 | 0 | 2  | 0 | 0 | 50 | 67  | 24041036 | 6.78E-01 | 1 |
| VPS37D   | 1197825 | 214  | 52  | 604844  | 215380 | 0 | 1  | 0 | 0 | 50 | 52  | 22245372 | 6.78E-01 | 1 |
| PURA     | 830974  | 290  | 48  | 790676  | 246352 | 0 | 3  | 2 | 0 | 14 | 29  | 8881844  | 6.78E-01 | 1 |
| ZCCHC18  | NaN     | NaN  | NaN | 1003564 | 290852 | 0 | 1  | 0 | 0 | 50 | 116 | 39936436 | 6.78E-01 | 1 |
| CLGN     | 134135  | 752  | 4   | 1637600 | 379852 | 0 | 5  | 1 | 0 | 50 | 60  | 19749100 | 6.79E-01 | 1 |
| TXNDC9   | 386109  | 630  | 24  | 597368  | 147028 | 0 | 1  | 0 | 0 | 50 | 51  | 23299132 | 6.79E-01 | 1 |
| ME3      | 346701  | 316  | 1   | 1545040 | 453188 | 0 | 6  | 0 | 0 | 3  | 1   | 1096836  | 6.79E-01 | 1 |
| PRSS45   | 298503  | 495  | 41  | 585264  | 161268 | 0 | 2  | 0 | 0 | 50 | 70  | 18972664 | 6.79E-01 | 1 |
| C2CD2    | 251773  | 366  | 76  | 1755792 | 532932 | 0 | 7  | 3 | 0 | 27 | 37  | 10835216 | 6.79E-01 | 1 |
| NIF3L1   | 635570  | 201  | 31  | 985052  | 251692 | 0 | 4  | 1 | 0 | 50 | 61  | 17116836 | 6.79E-01 | 1 |
| ANKRD39  | 822597  | 392  | 46  | 461732  | 142756 | 0 | 1  | 0 | 0 | 50 | 86  | 27656572 | 6.79E-01 | 1 |



|           |         |      |     |         |         |   |    |   |   |    |     |          |          |   |
|-----------|---------|------|-----|---------|---------|---|----|---|---|----|-----|----------|----------|---|
| RNF208    | 1724821 | 399  | 43  | 624780  | 214668  | 0 | 2  | 2 | 0 | 50 | 60  | 16636592 | 6.79E-01 | 1 |
| MTHFR     | 530804  | 196  | 39  | 1682100 | 469920  | 0 | 5  | 3 | 0 | 40 | 43  | 12524436 | 6.79E-01 | 1 |
| ARAF      | 775214  | NaN  | 38  | 1555720 | 453188  | 0 | 2  | 2 | 0 | 50 | 61  | 23561148 | 6.79E-01 | 1 |
| CCDC42    | 473874  | 604  | 17  | 832328  | 208972  | 0 | 3  | 0 | 0 | 45 | 70  | 18199432 | 6.79E-01 | 1 |
| CMIP      | 334492  | 428  | 21  | 2012824 | 576008  | 0 | 5  | 2 | 0 | 50 | 50  | 22328320 | 6.79E-01 | 1 |
| HGFAC     | 547964  | 412  | 46  | 1656468 | 505164  | 0 | 3  | 2 | 0 | 50 | 60  | 22528392 | 6.79E-01 | 1 |
| NXNL1     | 899127  | 211  | 26  | 522608  | 166252  | 0 | 1  | 1 | 0 | 50 | 49  | 18107584 | 6.79E-01 | 1 |
| OR5D16    | 4214    | 1074 | -46 | 810256  | 241724  | 0 | 3  | 0 | 0 | 25 | 38  | 10956256 | 6.79E-01 | 1 |
| ID3       | 1050775 | 159  | 32  | 296548  | 96476   | 0 | 1  | 0 | 0 | 50 | 68  | 18237524 | 6.80E-01 | 1 |
| FAM133A   | 33770   | NaN  | -11 | 647920  | 150944  | 0 | 2  | 0 | 0 | 50 | 124 | 35207332 | 6.80E-01 | 1 |
| NTRK1     | 1505782 | 208  | 45  | 2192604 | 653616  | 0 | 5  | 3 | 0 | 46 | 60  | 20885808 | 6.80E-01 | 1 |
| RERE      | 916698  | 436  | 27  | 3923120 | 1187260 | 0 | 14 | 2 | 0 | 3  | 12  | 4918140  | 6.80E-01 | 1 |
| C15orf27  | 374349  | 405  | 22  | 1355648 | 391600  | 0 | 3  | 0 | 0 | 50 | 45  | 21903612 | 6.80E-01 | 1 |
| RLIM      | 289586  | NaN  | 13  | 1562128 | 453188  | 0 | 5  | 3 | 0 | 43 | 54  | 14944880 | 6.80E-01 | 1 |
| PIGC      | 113155  | 450  | 11  | 728732  | 226060  | 0 | 2  | 0 | 0 | 50 | 71  | 23190908 | 6.80E-01 | 1 |
| FOXN3     | 111760  | 684  | 20  | 1258816 | 339980  | 0 | 3  | 1 | 0 | 50 | 52  | 20976232 | 6.80E-01 | 1 |
| JRK       | 384374  | 412  | 23  | 1467432 | 453900  | 0 | 3  | 2 | 0 | 32 | 19  | 11392712 | 6.80E-01 | 1 |
| ROCK1     | 185443  | 407  | -6  | 3644016 | 834108  | 0 | 8  | 1 | 0 | 50 | 41  | 20257112 | 6.80E-01 | 1 |
| CLDN12    | 140224  | 1085 | -8  | 597724  | 191528  | 0 | 1  | 0 | 0 | 50 | 46  | 23330816 | 6.80E-01 | 1 |
| FBXO32    | 535498  | 203  | 19  | 937348  | 237452  | 0 | 2  | 1 | 0 | 50 | 45  | 19740556 | 6.80E-01 | 1 |
| PNMA2     | 194700  | 452  | 14  | 901036  | 268424  | 0 | 2  | 1 | 0 | 50 | 58  | 22105464 | 6.80E-01 | 1 |
| DOCK1     | 97878   | 856  | -32 | 4953740 | 1244932 | 0 | 8  | 0 | 0 | 8  | 4   | 4126040  | 6.80E-01 | 1 |
| ENTPD5    | 443041  | 158  | 51  | 1128164 | 301888  | 0 | 3  | 0 | 0 | 50 | 55  | 19172380 | 6.80E-01 | 1 |
| PRB4      | 311837  | 673  | -1  | 601996  | 207548  | 0 | 2  | 0 | 0 | 50 | 60  | 16426552 | 6.80E-01 | 1 |
| TRIM43    | 394116  | 611  | 16  | 1173020 | 284800  | 0 | 3  | 0 | 0 | 50 | 45  | 20194812 | 6.80E-01 | 1 |
| CGN       | 1385164 | 176  | 31  | 3042376 | 900680  | 0 | 6  | 3 | 0 | 50 | 72  | 22882968 | 6.81E-01 | 1 |
| RGS11     | 1340678 | 205  | 43  | 1231404 | 342828  | 0 | 1  | 0 | 0 | 32 | 34  | 15239292 | 6.81E-01 | 1 |
| ATP5G2    | 1616455 | 189  | 50  | 490924  | 163760  | 0 | 1  | 1 | 0 | 50 | 62  | 21036040 | 6.81E-01 | 1 |
| FAM163B   | NaN     | NaN  | NaN | 411180  | 127092  | 0 | 1  | 0 | 0 | 50 | 116 | 39772676 | 6.81E-01 | 1 |
| BANK1     | 80568   | 482  | -7  | 2078328 | 508368  | 0 | 6  | 4 | 0 | 50 | 65  | 21971608 | 6.81E-01 | 1 |
| KIDINS22C | 280134  | 559  | 14  | 4547544 | 1253832 | 0 | 16 | 2 | 0 | 1  | 3   | 1488080  | 6.81E-01 | 1 |
| OR13C5    | 147494  | 920  | -31 | 789252  | 230688  | 0 | 3  | 1 | 0 | 50 | 80  | 20017168 | 6.81E-01 | 1 |
| PON2      | 137217  | 333  | -1  | 917056  | 254540  | 0 | 2  | 1 | 0 | 17 | 17  | 7429720  | 6.81E-01 | 1 |

|          |         |     |     |         |         |   |    |   |   |    |    |          |          |   |
|----------|---------|-----|-----|---------|---------|---|----|---|---|----|----|----------|----------|---|
| DDX50    | 897697  | 246 | 45  | 1902820 | 521540  | 0 | 4  | 0 | 0 | 22 | 34 | 13431524 | 6.81E-01 | 1 |
| ZNF616   | 460879  | 901 | -41 | 2012112 | 506232  | 0 | 7  | 3 | 0 | 50 | 67 | 18693560 | 6.81E-01 | 1 |
| C22orf23 | 1370748 | 203 | 50  | 574228  | 149876  | 0 | 1  | 0 | 0 | 50 | 37 | 18381704 | 6.81E-01 | 1 |
| NOL7     | 277395  | 425 | 37  | 687436  | 173372  | 0 | 2  | 1 | 0 | 50 | 65 | 20454336 | 6.81E-01 | 1 |
| GLS2     | 2793663 | 184 | 61  | 1576012 | 428624  | 0 | 4  | 1 | 0 | 29 | 60 | 17503096 | 6.81E-01 | 1 |
| GSTM2    | 927739  | 201 | 22  | 608048  | 141688  | 0 | 2  | 2 | 0 | 12 | 20 | 4092220  | 6.81E-01 | 1 |
| LEF1     | 231204  | 771 | 22  | 1132080 | 295836  | 0 | 3  | 1 | 0 | 50 | 56 | 21017528 | 6.81E-01 | 1 |
| UBE2F    | 507348  | 433 | 27  | 508368  | 126024  | 0 | 1  | 0 | 0 | 50 | 65 | 22767268 | 6.82E-01 | 1 |
| PCNXL2   | 146659  | 581 | -1  | 5449292 | 1541836 | 0 | 18 | 4 | 0 | 15 | 17 | 7268096  | 6.82E-01 | 1 |
| MFS2B    | 243145  | 226 | 33  | 1233896 | 412960  | 0 | 3  | 3 | 0 | 50 | 59 | 18078748 | 6.82E-01 | 1 |
| CEACAM3  | 1360684 | 454 | 23  | 642936  | 195444  | 0 | 2  | 0 | 0 | 50 | 69 | 18698900 | 6.82E-01 | 1 |
| SPATA2L  | 1090549 | 219 | 38  | 1008192 | 360984  | 0 | 3  | 1 | 0 | 50 | 51 | 16551864 | 6.82E-01 | 1 |
| ADAM33   | 942842  | 353 | 32  | 2081532 | 618372  | 0 | 4  | 0 | 0 | 7  | 3  | 3281608  | 6.82E-01 | 1 |
| C14orf93 | 1240941 | 185 | 38  | 1339628 | 408688  | 0 | 3  | 0 | 0 | 16 | 13 | 6672864  | 6.82E-01 | 1 |
| ZNF624   | 1055714 | 499 | -26 | 2247784 | 548240  | 0 | 6  | 0 | 0 | 7  | 4  | 3120340  | 6.82E-01 | 1 |
| SOX8     | 1131712 | 304 | 22  | 1091140 | 349592  | 0 | 3  | 2 | 0 | 13 | 7  | 3546116  | 6.82E-01 | 1 |
| SLC16A4  | 403650  | 479 | 31  | 1252408 | 345320  | 0 | 2  | 0 | 0 | 37 | 21 | 12040632 | 6.82E-01 | 1 |
| ZNF793   | 257166  | 914 | -56 | 1058388 | 262728  | 0 | 3  | 1 | 0 | 50 | 53 | 18226488 | 6.82E-01 | 1 |
| PTPRK    | 107062  | 714 | 4   | 3760428 | 1003920 | 0 | 14 | 1 | 0 | 0  | 1  | 1003920  | 6.83E-01 | 1 |
| HINT2    | 847663  | 227 | 54  | 412248  | 134568  | 0 | 1  | 0 | 0 | 50 | 66 | 20654408 | 6.83E-01 | 1 |
| VTCN1    | 322193  | 566 | 12  | 725884  | 204344  | 0 | 3  | 2 | 0 | 21 | 24 | 6588136  | 6.83E-01 | 1 |
| DENND5A  | 672390  | 330 | 31  | 3318632 | 902104  | 0 | 6  | 2 | 0 | 8  | 5  | 3294068  | 6.83E-01 | 1 |
| VWC2     | 53908   | 941 | -13 | 815952  | 238164  | 0 | 2  | 0 | 0 | 50 | 75 | 26171340 | 6.83E-01 | 1 |
| GGT6     | 1252775 | 318 | 22  | 1164476 | 433252  | 0 | 3  | 0 | 0 | 50 | 49 | 18259952 | 6.83E-01 | 1 |
| SYT17    | 766632  | 275 | 7   | 1207552 | 344252  | 0 | 2  | 1 | 0 | 50 | 86 | 27421256 | 6.83E-01 | 1 |
| MANSC1   | 698798  | 242 | 20  | 1065864 | 331080  | 0 | 2  | 0 | 0 | 39 | 46 | 14308352 | 6.83E-01 | 1 |
| PLEKHB2  | 461881  | 331 | 16  | 589892  | 154504  | 0 | 2  | 1 | 0 | 33 | 39 | 10825604 | 6.83E-01 | 1 |
| APLP2    | 624855  | 203 | 15  | 2010688 | 509792  | 0 | 5  | 2 | 0 | 50 | 42 | 19945968 | 6.83E-01 | 1 |
| SPATA4   | 134663  | 504 | -4  | 788896  | 212888  | 0 | 6  | 3 | 0 | 2  | 6  | 1294416  | 6.83E-01 | 1 |
| G3BP2    | 485383  | 451 | 31  | 1251340 | 343184  | 0 | 3  | 1 | 0 | 50 | 54 | 22354308 | 6.83E-01 | 1 |
| RBM25    | 456437  | 274 | 42  | 2223932 | 557140  | 0 | 7  | 0 | 0 | 5  | 7  | 3021372  | 6.83E-01 | 1 |
| FAM126B  | 646602  | 167 | 33  | 1351732 | 392312  | 0 | 2  | 1 | 0 | 50 | 61 | 20826000 | 6.83E-01 | 1 |
| CRTP10   | 874480  | 461 | 25  | 909224  | 265576  | 0 | 3  | 0 | 0 | 50 | 76 | 22638396 | 6.83E-01 | 1 |

|         |         |      |     |         |         |   |    |   |   |    |    |          |          |   |
|---------|---------|------|-----|---------|---------|---|----|---|---|----|----|----------|----------|---|
| SCARA3  | 350607  | 232  | 30  | 1529020 | 473480  | 0 | 4  | 0 | 0 | 43 | 53 | 22780796 | 6.83E-01 | 1 |
| OR8D4   | 89099   | 736  | -8  | 776436  | 230688  | 0 | 2  | 0 | 0 | 34 | 50 | 17740192 | 6.83E-01 | 1 |
| ST8SIA4 | 24350   | 1122 | 36  | 920972  | 251692  | 0 | 2  | 1 | 0 | 50 | 57 | 23360008 | 6.83E-01 | 1 |
| RFK     | 106798  | 603  | -10 | 410468  | 102172  | 0 | 1  | 0 | 0 | 50 | 66 | 23428716 | 6.83E-01 | 1 |
| HAO1    | 67871   | 715  | -23 | 946960  | 273764  | 0 | 5  | 0 | 0 | 14 | 22 | 5641888  | 6.83E-01 | 1 |
| GRIN2C  | 1027517 | 320  | 20  | 3020304 | 984696  | 0 | 10 | 5 | 0 | 10 | 17 | 5209348  | 6.83E-01 | 1 |
| GTPBP10 | 138505  | 1085 | -5  | 1019584 | 264152  | 0 | 1  | 0 | 0 | 50 | 49 | 18619868 | 6.83E-01 | 1 |
| SLCO2B1 | 752269  | 449  | 48  | 1783560 | 546816  | 0 | 3  | 1 | 0 | 50 | 59 | 22513796 | 6.83E-01 | 1 |
| SCN2B   | 707709  | 293  | 56  | 552156  | 152724  | 0 | 1  | 0 | 0 | 50 | 54 | 16045632 | 6.83E-01 | 1 |
| FSCN2   | 3623687 | 204  | 19  | 1140624 | 363120  | 0 | 3  | 1 | 0 | 40 | 39 | 14920316 | 6.84E-01 | 1 |
| MYO7B   | 528013  | 229  | 36  | 5447512 | 1531868 | 0 | 13 | 4 | 0 | 36 | 31 | 13816716 | 6.84E-01 | 1 |
| CBFB    | 1068656 | 125  | 48  | 526524  | 130296  | 0 | 1  | 0 | 0 | 50 | 46 | 20351096 | 6.84E-01 | 1 |
| FMO2    | 440278  | 1004 | -6  | 1228556 | 317908  | 0 | 4  | 1 | 0 | 50 | 72 | 23262464 | 6.84E-01 | 1 |
| COPE    | 1390116 | 198  | 20  | 803492  | 227128  | 0 | 3  | 0 | 0 | 50 | 73 | 19047780 | 6.84E-01 | 1 |
| MAN2B1  | 1975767 | 409  | 1   | 2578508 | 764332  | 0 | 8  | 3 | 0 | 50 | 74 | 27829232 | 6.84E-01 | 1 |
| SHPRH   | 93507   | 878  | 7   | 4415824 | 1148456 | 0 | 11 | 3 | 0 | 31 | 31 | 14902872 | 6.84E-01 | 1 |
| GPCPD1  | 556687  | 225  | 3   | 1785340 | 452120  | 0 | 6  | 0 | 0 | 20 | 22 | 8672160  | 6.84E-01 | 1 |
| HADHB   | 642780  | 250  | 34  | 1237812 | 348168  | 0 | 2  | 0 | 0 | 13 | 11 | 7197608  | 6.84E-01 | 1 |
| USP37   | 841802  | 168  | 42  | 2585984 | 652192  | 0 | 7  | 1 | 0 | 10 | 14 | 5863676  | 6.84E-01 | 1 |
| PSME3   | 1633092 | 190  | 33  | 722680  | 178712  | 0 | 2  | 0 | 0 | 24 | 22 | 8134244  | 6.84E-01 | 1 |
| COMMD1  | 563800  | 420  | 26  | 485584  | 137060  | 0 | 1  | 0 | 0 | 50 | 63 | 23156376 | 6.84E-01 | 1 |
| ISCA2   | 749329  | 384  | 31  | 392668  | 118904  | 0 | 1  | 0 | 0 | 50 | 65 | 22029992 | 6.84E-01 | 1 |
| CRTP19  | 14979   | 1035 | -68 | 208616  | 62656   | 0 | 1  | 1 | 0 | 27 | 40 | 7047376  | 6.84E-01 | 1 |
| TPBG    | 131014  | 486  | -3  | 1005700 | 343184  | 0 | 4  | 2 | 0 | 20 | 29 | 8569988  | 6.84E-01 | 1 |
| ERGIC3  | 1515751 | 169  | 58  | 1040232 | 263796  | 0 | 1  | 0 | 0 | 36 | 47 | 16385256 | 6.84E-01 | 1 |
| PLA2G1B | 1621662 | 187  | 56  | 398720  | 95764   | 0 | 1  | 0 | 0 | 50 | 72 | 23682188 | 6.84E-01 | 1 |
| COL9A1  | 126322  | 633  | 5   | 2435396 | 755788  | 0 | 8  | 3 | 0 | 29 | 34 | 10808160 | 6.85E-01 | 1 |
| SIGLEC5 | 443199  | 644  | -23 | 1385196 | 417588  | 0 | 4  | 0 | 0 | 27 | 27 | 10304064 | 6.85E-01 | 1 |
| UBA3    | 264082  | 443  | 20  | 1240304 | 321112  | 0 | 5  | 2 | 0 | 8  | 7  | 2888228  | 6.85E-01 | 1 |
| CRYBB1  | 162003  | 462  | -9  | 646140  | 187968  | 0 | 5  | 2 | 0 | 3  | 2  | 712712   | 6.85E-01 | 1 |
| EHD4    | 830035  | 224  | 39  | 1374516 | 385548  | 0 | 2  | 3 | 0 | 41 | 44 | 15672544 | 6.85E-01 | 1 |
| FAM199X | 354255  | NaN  | 47  | 1002140 | 265576  | 0 | 3  | 0 | 0 | 50 | 58 | 20023576 | 6.85E-01 | 1 |
| TFDP1   | 729832  | 370  | 53  | 1076900 | 286936  | 0 | 3  | 0 | 0 | 50 | 58 | 19838100 | 6.85E-01 | 1 |

|          |         |      |     |         |         |   |    |   |   |    |    |          |          |   |
|----------|---------|------|-----|---------|---------|---|----|---|---|----|----|----------|----------|---|
| PPP6C    | 951081  | 168  | 46  | 886440  | 242436  | 0 | 3  | 0 | 0 | 25 | 28 | 10521936 | 6.85E-01 | 1 |
| C1orf87  | 66197   | 942  | -13 | 1427204 | 372376  | 0 | 4  | 3 | 0 | 17 | 30 | 8887896  | 6.85E-01 | 1 |
| ZNF776   | 680410  | 849  | -50 | 1341764 | 329656  | 0 | 4  | 1 | 0 | 50 | 69 | 18021076 | 6.85E-01 | 1 |
| THADA    | 428893  | 408  | 38  | 5068372 | 1350308 | 0 | 11 | 2 | 0 | 6  | 6  | 3640456  | 6.85E-01 | 1 |
| PARS2    | 578299  | 343  | 23  | 1168748 | 360628  | 0 | 3  | 1 | 0 | 50 | 44 | 21555444 | 6.85E-01 | 1 |
| C11orf45 | NaN     | NaN  | NaN | 370596  | 110004  | 0 | 1  | 1 | 0 | 26 | 41 | 11687124 | 6.85E-01 | 1 |
| GLDN     | 317532  | 443  | 10  | 1402640 | 404416  | 0 | 4  | 0 | 0 | 50 | 42 | 18573588 | 6.85E-01 | 1 |
| OR10S1   | 107524  | 830  | -5  | 805272  | 258456  | 0 | 3  | 3 | 0 | 13 | 13 | 3654340  | 6.85E-01 | 1 |
| TMCO1    | 321853  | 406  | -2  | 496976  | 134212  | 0 | 1  | 0 | 0 | 50 | 54 | 20372100 | 6.85E-01 | 1 |
| PBX4     | 818567  | 284  | -1  | 953368  | 279104  | 0 | 3  | 0 | 0 | 50 | 58 | 19983348 | 6.85E-01 | 1 |
| CDH13    | 94658   | 929  | -26 | 1813108 | 530084  | 0 | 9  | 4 | 0 | 20 | 41 | 7917440  | 6.85E-01 | 1 |
| HOXD12   | 242935  | 874  | 15  | 654328  | 218228  | 0 | 2  | 1 | 0 | 50 | 65 | 19479964 | 6.85E-01 | 1 |
| SQRDL    | 201356  | 490  | 1   | 1155220 | 328232  | 0 | 1  | 1 | 0 | 50 | 57 | 22840604 | 6.86E-01 | 1 |
| NUP37    | 232146  | 467  | 9   | 862588  | 221432  | 0 | 2  | 0 | 0 | 48 | 53 | 21168472 | 6.86E-01 | 1 |
| TRPV3    | 441141  | 442  | -2  | 2047000 | 559988  | 0 | 5  | 3 | 0 | 50 | 42 | 19085160 | 6.86E-01 | 1 |
| BAZ1B    | 929895  | 162  | 48  | 3846936 | 988968  | 0 | 12 | 3 | 0 | 20 | 28 | 10522648 | 6.86E-01 | 1 |
| DUT      | 333686  | 381  | -34 | 656108  | 203632  | 0 | 2  | 1 | 0 | 50 | 82 | 24242532 | 6.86E-01 | 1 |
| CRABP2   | 1851672 | 180  | 37  | 363120  | 95052   | 0 | 1  | 0 | 0 | 50 | 84 | 23475352 | 6.86E-01 | 1 |
| CDC20B   | 222731  | 430  | 2   | 1344968 | 368104  | 0 | 2  | 2 | 0 | 40 | 47 | 17209040 | 6.86E-01 | 1 |
| HPS1     | 127652  | 581  | 10  | 1823432 | 535780  | 0 | 3  | 2 | 0 | 50 | 52 | 22253916 | 6.86E-01 | 1 |
| LCAT     | 879834  | 158  | 50  | 1106804 | 331792  | 0 | 2  | 2 | 0 | 43 | 70 | 20481748 | 6.86E-01 | 1 |
| FAM151A  | 723136  | 415  | 20  | 1451056 | 460664  | 0 | 5  | 1 | 0 | 50 | 74 | 23149256 | 6.87E-01 | 1 |
| PLA2G4D  | 680403  | 360  | 46  | 2089008 | 618372  | 0 | 2  | 0 | 0 | 18 | 10 | 6924200  | 6.87E-01 | 1 |
| LUZP2    | 1913    | 1282 | -32 | 928092  | 230688  | 0 | 5  | 1 | 0 | 31 | 64 | 15414088 | 6.87E-01 | 1 |
| MAK16    | 91648   | 507  | 12  | 819156  | 187968  | 0 | 2  | 1 | 0 | 50 | 66 | 24660120 | 6.87E-01 | 1 |
| CCDC106  | 1077402 | 254  | -10 | 715560  | 206124  | 0 | 3  | 0 | 0 | 8  | 8  | 2559640  | 6.87E-01 | 1 |
| ATL2     | 808394  | 366  | 25  | 1618020 | 423996  | 0 | 4  | 0 | 0 | 42 | 43 | 19220440 | 6.87E-01 | 1 |
| LACTB2   | 240331  | 562  | 31  | 758636  | 195088  | 0 | 2  | 1 | 0 | 50 | 69 | 23240392 | 6.87E-01 | 1 |
| RASL10A  | 849693  | 251  | 36  | 494484  | 169812  | 0 | 1  | 1 | 0 | 50 | 58 | 21612760 | 6.87E-01 | 1 |
| ATP6V1C2 | 744427  | 428  | 42  | 1123180 | 303668  | 0 | 3  | 1 | 0 | 50 | 69 | 24253924 | 6.87E-01 | 1 |
| CPB2     | 354901  | 679  | 53  | 1128164 | 275188  | 0 | 5  | 1 | 0 | 10 | 11 | 2131372  | 6.87E-01 | 1 |
| DENND1C  | 865106  | 219  | 33  | 2046644 | 619084  | 0 | 7  | 2 | 0 | 50 | 76 | 20954160 | 6.87E-01 | 1 |
| OBP2A    | 327501  | 539  | 37  | 456036  | 118548  | 0 | 1  | 1 | 0 | 41 | 41 | 15650828 | 6.87E-01 | 1 |

|          |         |      |     |         |         |   |    |   |   |    |     |          |          |   |
|----------|---------|------|-----|---------|---------|---|----|---|---|----|-----|----------|----------|---|
| TSEN34   | 735613  | 439  | -53 | 763976  | 249556  | 0 | 2  | 0 | 0 | 18 | 36  | 7425804  | 6.87E-01 | 1 |
| SNRPD3   | 480889  | 194  | 48  | 328588  | 91136   | 0 | 1  | 1 | 0 | 7  | 4   | 1654688  | 6.87E-01 | 1 |
| CHST9    | 48644   | 872  | -24 | 1162340 | 281596  | 0 | 3  | 0 | 0 | 19 | 36  | 9570348  | 6.87E-01 | 1 |
| SLC22A25 | 1852481 | 572  | 32  | 1383416 | 406552  | 0 | 4  | 0 | 0 | 28 | 25  | 11288760 | 6.87E-01 | 1 |
| NECAB1   | 108662  | 842  | -13 | 956572  | 222500  | 0 | 3  | 0 | 0 | 50 | 100 | 31419492 | 6.87E-01 | 1 |
| NPY5R    | 74427   | 1197 | -18 | 1122112 | 311144  | 0 | 5  | 2 | 0 | 37 | 62  | 15371012 | 6.87E-01 | 1 |
| RPL32    | 508965  | 269  | 39  | 353508  | 95052   | 0 | 1  | 1 | 0 | 13 | 13  | 4086880  | 6.87E-01 | 1 |
| SLC29A3  | 619612  | 487  | 40  | 1176936 | 379140  | 0 | 3  | 1 | 0 | 50 | 71  | 27440836 | 6.87E-01 | 1 |
| SPRYD4   | 2793663 | 184  | 61  | 514064  | 158776  | 0 | 1  | 0 | 0 | 29 | 60  | 17503096 | 6.88E-01 | 1 |
| SPRYD3   | 1726226 | 177  | 38  | 1149168 | 315060  | 0 | 3  | 0 | 0 | 9  | 18  | 5240676  | 6.88E-01 | 1 |
| IFT20    | 1405196 | 214  | 10  | 395160  | 105732  | 0 | 1  | 0 | 0 | 50 | 74  | 22499912 | 6.88E-01 | 1 |
| PLAC8L1  | 396247  | 406  | -2  | 461376  | 123888  | 0 | 1  | 0 | 0 | 50 | 55  | 18144608 | 6.88E-01 | 1 |
| ASGR2    | 1682013 | 348  | 15  | 828412  | 205412  | 0 | 2  | 1 | 0 | 50 | 56  | 20137140 | 6.88E-01 | 1 |
| SNAP47   | 595623  | 459  | 1   | 1237100 | 378784  | 0 | 3  | 2 | 0 | 50 | 38  | 16917832 | 6.88E-01 | 1 |
| NME1     | NaN     | NaN  | NaN | 461020  | 126380  | 0 | 1  | 1 | 0 | 50 | 117 | 39771964 | 6.88E-01 | 1 |
| RCAN1    | 337408  | 491  | 39  | 724816  | 195800  | 0 | 2  | 1 | 0 | 50 | 52  | 17638732 | 6.88E-01 | 1 |
| ARHGAP20 | 146681  | 501  | -5  | 3036680 | 842296  | 0 | 13 | 3 | 0 | 17 | 20  | 6267024  | 6.88E-01 | 1 |
| ITGB6    | 227667  | 212  | 2   | 2050560 | 541476  | 0 | 5  | 0 | 0 | 30 | 23  | 12382748 | 6.88E-01 | 1 |
| SIVA1    | 711772  | 247  | 36  | 443932  | 134924  | 0 | 2  | 1 | 0 | 10 | 13  | 2962988  | 6.88E-01 | 1 |
| MYLK3    | 443420  | 253  | -10 | 2062664 | 615880  | 0 | 7  | 0 | 0 | 3  | 2   | 1637956  | 6.88E-01 | 1 |
| PLEKHA1  | 255946  | 174  | 10  | 1069068 | 275544  | 0 | 1  | 1 | 0 | 50 | 53  | 18916416 | 6.88E-01 | 1 |
| TMEM196  | 187539  | 874  | -4  | 438592  | 130652  | 0 | 1  | 0 | 0 | 50 | 56  | 18458956 | 6.88E-01 | 1 |
| KBTBD6   | 314264  | 337  | 66  | 1674980 | 487720  | 0 | 4  | 1 | 0 | 50 | 73  | 22716004 | 6.89E-01 | 1 |
| BIN3     | 761528  | 224  | 49  | 683520  | 166608  | 0 | 1  | 1 | 0 | 50 | 53  | 19833472 | 6.89E-01 | 1 |
| TYRO3    | 744461  | 166  | 44  | 2251700 | 679960  | 0 | 6  | 3 | 0 | 50 | 61  | 20671140 | 6.89E-01 | 1 |
| TEAD3    | 683460  | 280  | 36  | 1134216 | 313992  | 0 | 5  | 2 | 0 | 15 | 26  | 5361716  | 6.89E-01 | 1 |
| CAV3     | 99517   | 555  | -9  | 393024  | 106800  | 0 | 1  | 1 | 0 | 50 | 60  | 19567184 | 6.89E-01 | 1 |
| PQLC2    | 810462  | 448  | 40  | 733360  | 232112  | 0 | 2  | 2 | 0 | 7  | 5   | 2296912  | 6.89E-01 | 1 |
| SPATA8   | 93099   | 986  | -46 | 271272  | 76896   | 0 | 1  | 1 | 0 | 13 | 17  | 4106104  | 6.89E-01 | 1 |
| EML5     | 161619  | 704  | 1   | 5162000 | 1354936 | 0 | 9  | 2 | 0 | 27 | 23  | 12060924 | 6.89E-01 | 1 |
| GOLGA6B  | 1113552 | 419  | 37  | 1756504 | 449984  | 0 | 2  | 0 | 0 | 5  | 2   | 2293352  | 6.89E-01 | 1 |
| TNIP2    | 628294  | 228  | 46  | 1084376 | 321112  | 0 | 4  | 0 | 0 | 12 | 17  | 5904260  | 6.89E-01 | 1 |
| LPO      | 838530  | 401  | 15  | 1811684 | 524032  | 0 | 8  | 1 | 0 | 27 | 38  | 11195132 | 6.89E-01 | 1 |

|          |         |      |     |         |         |   |    |   |   |    |     |          |          |   |
|----------|---------|------|-----|---------|---------|---|----|---|---|----|-----|----------|----------|---|
| TBC1D16  | 660356  | 237  | 21  | 1935216 | 572448  | 0 | 7  | 3 | 0 | 50 | 66  | 18046708 | 6.90E-01 | 1 |
| APBB1    | 424837  | 471  | 17  | 1801004 | 532576  | 0 | 5  | 0 | 0 | 7  | 3   | 2390896  | 6.90E-01 | 1 |
| OR5M9    | NaN     | NaN  | NaN | 767892  | 226416  | 0 | 2  | 1 | 0 | 50 | 117 | 39872000 | 6.90E-01 | 1 |
| COG2     | 379098  | 568  | 3   | 1929164 | 511216  | 0 | 4  | 0 | 0 | 5  | 9   | 4171252  | 6.90E-01 | 1 |
| ZNF407   | 190381  | 1127 | 23  | 5794256 | 1578148 | 0 | 14 | 5 | 0 | 50 | 43  | 21305888 | 6.90E-01 | 1 |
| LIN7C    | 371553  | 477  | -10 | 509436  | 144180  | 0 | 1  | 0 | 0 | 50 | 60  | 24983012 | 6.90E-01 | 1 |
| DYNC1LI1 | 434251  | 568  | 35  | 1355648 | 376648  | 0 | 4  | 0 | 0 | 11 | 17  | 5121416  | 6.90E-01 | 1 |
| TET1     | 824682  | 168  | 41  | 5365632 | 1524036 | 0 | 17 | 5 | 0 | 50 | 54  | 19092636 | 6.90E-01 | 1 |
| CSNK1A1I | 156140  | 631  | 31  | 858316  | 224636  | 0 | 2  | 1 | 0 | 24 | 23  | 9893240  | 6.90E-01 | 1 |
| WBP2NL   | 1328069 | 323  | 66  | 770740  | 245996  | 0 | 2  | 2 | 0 | 50 | 50  | 16070196 | 6.91E-01 | 1 |
| MMP21    | 216532  | 351  | -6  | 1435392 | 416520  | 0 | 3  | 2 | 0 | 29 | 27  | 12476732 | 6.91E-01 | 1 |
| LSS      | 775666  | 624  | 68  | 1918484 | 526168  | 0 | 9  | 0 | 0 | 0  | 0   | 526168   | 6.91E-01 | 1 |
| SPIN2A   | 145137  | NaN  | 18  | 653972  | 180136  | 0 | 2  | 0 | 0 | 50 | 49  | 14659724 | 6.91E-01 | 1 |
| KCNIP3   | 246871  | 498  | 14  | 774300  | 195444  | 0 | 2  | 1 | 0 | 50 | 55  | 18159204 | 6.91E-01 | 1 |
| VNN1     | 127166  | 569  | 2   | 1311504 | 363120  | 0 | 3  | 1 | 0 | 50 | 64  | 25911104 | 6.91E-01 | 1 |
| MRPS18A  | 1626879 | 278  | 43  | 504452  | 150232  | 0 | 1  | 0 | 0 | 50 | 72  | 24531960 | 6.91E-01 | 1 |
| GUCY1A3  | 43073   | 764  | 1   | 1780712 | 481312  | 0 | 9  | 3 | 0 | 4  | 9   | 2265228  | 6.91E-01 | 1 |
| DCP1A    | 782208  | 167  | 43  | 1469568 | 436812  | 0 | 3  | 2 | 0 | 41 | 57  | 19274908 | 6.91E-01 | 1 |
| RSAD1    | 1332860 | 200  | 23  | 1094344 | 361340  | 0 | 3  | 0 | 0 | 50 | 72  | 24178452 | 6.91E-01 | 1 |
| FKBP6    | 902769  | 422  | 52  | 881812  | 250268  | 0 | 3  | 0 | 0 | 50 | 86  | 23744844 | 6.91E-01 | 1 |
| SLC7A5   | 604095  | 133  | 34  | 1260240 | 407976  | 0 | 4  | 0 | 0 | 50 | 49  | 19160632 | 6.91E-01 | 1 |
| GPHA2    | 3151458 | 209  | 52  | 328588  | 98612   | 0 | 1  | 0 | 0 | 50 | 83  | 23753744 | 6.91E-01 | 1 |
| CD83     | 210380  | 594  | 40  | 527236  | 149876  | 0 | 1  | 0 | 0 | 50 | 49  | 18477468 | 6.91E-01 | 1 |
| Clorf141 | 444524  | 673  | -5  | 1054472 | 255964  | 0 | 8  | 0 | 0 | 5  | 7   | 1360632  | 6.92E-01 | 1 |
| HLA-DMB  | 1276842 | 431  | 40  | 672128  | 195088  | 0 | 2  | 1 | 0 | 19 | 22  | 6752608  | 6.92E-01 | 1 |
| GDF9     | 702301  | 200  | 62  | 1138488 | 323604  | 0 | 5  | 2 | 0 | 50 | 64  | 17001136 | 6.92E-01 | 1 |
| ANKRD52  | 2878071 | 171  | 46  | 2743336 | 824852  | 0 | 9  | 1 | 0 | 13 | 15  | 6175532  | 6.92E-01 | 1 |
| CLK3     | 635020  | 206  | 51  | 1625496 | 473124  | 0 | 2  | 1 | 0 | 38 | 35  | 15894688 | 6.92E-01 | 1 |
| GGA2     | 525761  | 628  | 36  | 1590608 | 447136  | 0 | 4  | 1 | 0 | 50 | 62  | 19047424 | 6.92E-01 | 1 |
| DNAJC21  | 241905  | 675  | 21  | 1553940 | 346032  | 0 | 4  | 0 | 0 | 50 | 44  | 20410904 | 6.92E-01 | 1 |
| PAX6     | 172494  | 631  | -11 | 1131724 | 315416  | 0 | 1  | 0 | 0 | 50 | 54  | 24314800 | 6.92E-01 | 1 |
| MRPL38   | 1697896 | 165  | 28  | 970812  | 284088  | 0 | 3  | 2 | 0 | 26 | 52  | 10930624 | 6.92E-01 | 1 |
| FRG2     | 59973   | 1059 | -12 | 712000  | 196868  | 0 | 2  | 1 | 0 | 16 | 30  | 9186580  | 6.92E-01 | 1 |

|         |         |      |     |          |         |   |    |    |   |    |     |          |          |   |
|---------|---------|------|-----|----------|---------|---|----|----|---|----|-----|----------|----------|---|
| PCSK1   | 525524  | 288  | 24  | 1987904  | 529372  | 0 | 6  | 2  | 0 | 27 | 22  | 9083696  | 6.92E-01 | 1 |
| FIS1    | 1022626 | 258  | 39  | 397652   | 111784  | 0 | 1  | 1  | 0 | 50 | 67  | 19705312 | 6.92E-01 | 1 |
| OR52W1  | 466636  | 728  | 4   | 752584   | 273764  | 0 | 1  | 2  | 0 | 24 | 21  | 8464256  | 6.92E-01 | 1 |
| ZNF267  | 263122  | 850  | -18 | 1939488  | 457104  | 0 | 5  | 0  | 0 | 19 | 25  | 7327904  | 6.92E-01 | 1 |
| GFPT1   | 481090  | 144  | 17  | 1799580  | 462444  | 0 | 5  | 2  | 0 | 50 | 43  | 20692856 | 6.92E-01 | 1 |
| PLEKHJ1 | 1603571 | 240  | 27  | 399788   | 104308  | 0 | 1  | 0  | 0 | 50 | 66  | 21932448 | 6.92E-01 | 1 |
| DSCC1   | 294228  | 677  | 12  | 1038808  | 257744  | 0 | 2  | 0  | 0 | 50 | 63  | 19367112 | 6.92E-01 | 1 |
| RGS7BP  | 78559   | 688  | -3  | 668212   | 179780  | 0 | 2  | 0  | 0 | 50 | 62  | 18106516 | 6.92E-01 | 1 |
| REM2    | 1177534 | 225  | 34  | 841228   | 270560  | 0 | 2  | 0  | 0 | 50 | 44  | 16175572 | 6.92E-01 | 1 |
| GBP6    | 441714  | 820  | -2  | 1648636  | 425420  | 0 | 4  | 2  | 0 | 16 | 19  | 5357444  | 6.92E-01 | 1 |
| GDF10   | NaN     | NaN  | NaN | 1161272  | 381988  | 0 | 4  | 0  | 0 | 50 | 116 | 40027572 | 6.93E-01 | 1 |
| PDGFRL  | 462541  | 220  | 4   | 955148   | 273052  | 0 | 1  | 2  | 0 | 20 | 18  | 6619464  | 6.93E-01 | 1 |
| YY1     | 412002  | 237  | 37  | 1051624  | 295124  | 0 | 2  | 0  | 0 | 50 | 44  | 19346464 | 6.93E-01 | 1 |
| REEP6   | 2352825 | 221  | 38  | 469920   | 139908  | 0 | 1  | 0  | 0 | 50 | 55  | 18329728 | 6.93E-01 | 1 |
| COL2A1  | 374433  | 246  | 47  | 3742272  | 1251696 | 0 | 11 | 1  | 0 | 0  | 1   | 1251696  | 6.93E-01 | 1 |
| ZNF576  | 441738  | 209  | 6   | 431472   | 124956  | 0 | 1  | 0  | 0 | 50 | 64  | 22145336 | 6.93E-01 | 1 |
| TG      | 237421  | 677  | 9   | 7080128  | 1995736 | 0 | 25 | 8  | 0 | 50 | 62  | 22618816 | 6.93E-01 | 1 |
| PIP5K1C | 2156221 | 206  | 32  | 1721260  | 496976  | 0 | 7  | 1  | 0 | 18 | 26  | 7576036  | 6.93E-01 | 1 |
| GCLM    | 558028  | 275  | 9   | 714136   | 192596  | 0 | 2  | 1  | 0 | 26 | 48  | 15139968 | 6.93E-01 | 1 |
| CSNK1G2 | 1944774 | 239  | 36  | 1080104  | 295480  | 0 | 4  | 2  | 0 | 8  | 8   | 3166620  | 6.93E-01 | 1 |
| FAM107B | 256093  | 327  | 36  | 793168   | 207548  | 0 | 2  | 1  | 0 | 46 | 50  | 17301600 | 6.93E-01 | 1 |
| PHACTR1 | 251440  | 714  | 17  | 1508372  | 408688  | 0 | 4  | 2  | 0 | 17 | 20  | 6217540  | 6.93E-01 | 1 |
| FHL5    | 116593  | 1376 | 3   | 767180   | 167320  | 0 | 3  | 1  | 0 | 15 | 12  | 3880400  | 6.93E-01 | 1 |
| DDB1    | 1259416 | 286  | 50  | 2958004  | 808832  | 0 | 8  | 1  | 0 | 15 | 15  | 6420816  | 6.93E-01 | 1 |
| ADCK5   | 2284602 | 200  | 32  | 1472416  | 451052  | 0 | 5  | 2  | 0 | 50 | 61  | 21451136 | 6.93E-01 | 1 |
| PVRL2   | 920101  | 196  | -3  | 1646856  | 541476  | 0 | 5  | 1  | 0 | 4  | 3   | 1628344  | 6.94E-01 | 1 |
| TMEM181 | 646528  | 306  | 46  | 1583132  | 451408  | 0 | 5  | 3  | 0 | 28 | 30  | 11722368 | 6.94E-01 | 1 |
| MUC17   | 1124475 | 272  | 43  | 10683204 | 3768972 | 0 | 52 | 16 | 0 | 33 | 68  | 17122176 | 6.94E-01 | 1 |
| CD47    | 288227  | 650  | 5   | 857248   | 227840  | 0 | 2  | 2  | 0 | 19 | 17  | 7092944  | 6.94E-01 | 1 |
| SAMD8   | 215938  | 188  | 39  | 1101108  | 291564  | 0 | 2  | 0  | 0 | 50 | 65  | 18393096 | 6.94E-01 | 1 |
| FSTL4   | 599945  | 623  | 42  | 2146324  | 618728  | 0 | 8  | 2  | 0 | 50 | 63  | 22132876 | 6.94E-01 | 1 |
| RB1CC1  | 97322   | 559  | -1  | 4171608  | 1032756 | 0 | 15 | 5  | 0 | 26 | 33  | 11860852 | 6.94E-01 | 1 |
| CCDC7   | 602870  | 482  | 2   | 1327524  | 305448  | 0 | 4  | 2  | 0 | 50 | 46  | 16397360 | 6.94E-01 | 1 |

|          |         |      |     |          |         |   |    |    |   |    |    |          |          |   |
|----------|---------|------|-----|----------|---------|---|----|----|---|----|----|----------|----------|---|
| CCL22    | 716661  | 153  | 38  | 243148   | 68708   | 0 | 2  | 1  | 0 | 1  | 2  | 469208   | 6.94E-01 | 1 |
| IREB2    | 506215  | 435  | 33  | 2491288  | 687080  | 0 | 8  | 2  | 0 | 10 | 7  | 2993960  | 6.94E-01 | 1 |
| HIST1H3G | 390169  | 544  | 57  | 331080   | 110004  | 0 | 1  | 1  | 0 | 50 | 61 | 13862640 | 6.94E-01 | 1 |
| SKIV2L2  | 344578  | 395  | 38  | 2762204  | 692776  | 0 | 9  | 2  | 0 | 32 | 38 | 14493828 | 6.94E-01 | 1 |
| VSX2     | 652027  | 358  | 47  | 907088   | 271984  | 0 | 1  | 0  | 0 | 26 | 16 | 11798908 | 6.94E-01 | 1 |
| KRT33A   | 1321356 | 424  | -6  | 1027772  | 297616  | 0 | 3  | 0  | 0 | 18 | 19 | 6810636  | 6.94E-01 | 1 |
| ATP8A2   | 331788  | 648  | 20  | 3122120  | 841228  | 0 | 12 | 4  | 0 | 13 | 21 | 6233204  | 6.94E-01 | 1 |
| RAB40AL  | 208589  | NaN  | 36  | 686012   | 210040  | 0 | 2  | 1  | 0 | 50 | 54 | 16148872 | 6.94E-01 | 1 |
| ZNF331   | 605686  | 808  | -54 | 1211824  | 287648  | 0 | 4  | 2  | 0 | 50 | 72 | 17053468 | 6.94E-01 | 1 |
| MYPOP    | 874987  | 198  | 41  | 938772   | 351372  | 0 | 3  | 1  | 0 | 50 | 67 | 20862312 | 6.94E-01 | 1 |
| SPANXN4  | 2776    | NaN  | -19 | 267000   | 61944   | 0 | 1  | 0  | 0 | 50 | 96 | 22070576 | 6.94E-01 | 1 |
| RARS     | 413838  | 432  | 30  | 1734788  | 445000  | 0 | 6  | 1  | 0 | 24 | 27 | 10474944 | 6.94E-01 | 1 |
| TAS2R7   | 408176  | 517  | 12  | 799932   | 226416  | 0 | 2  | 0  | 0 | 50 | 54 | 19041016 | 6.94E-01 | 1 |
| IL31     | NaN     | NaN  | NaN | 418300   | 121040  | 0 | 2  | 2  | 0 | 2  | 6  | 977576   | 6.95E-01 | 1 |
| PSMB3    | 1198833 | 207  | 37  | 541476   | 144180  | 0 | 2  | 1  | 0 | 7  | 7  | 2216100  | 6.95E-01 | 1 |
| RNF133   | 53042   | 1027 | 6   | 946604   | 263440  | 0 | 2  | 0  | 0 | 50 | 55 | 23106180 | 6.95E-01 | 1 |
| FUBP3    | 529622  | 192  | 35  | 1507304  | 405484  | 0 | 3  | 1  | 0 | 50 | 57 | 18712428 | 6.95E-01 | 1 |
| RNF214   | 436617  | 360  | 36  | 1806700  | 508724  | 0 | 3  | 0  | 0 | 10 | 11 | 5321132  | 6.95E-01 | 1 |
| PANX2    | 944000  | 242  | 49  | 1644364  | 536492  | 0 | 3  | 1  | 0 | 50 | 67 | 23711024 | 6.95E-01 | 1 |
| AGT      | 422372  | 568  | 6   | 1193668  | 380564  | 0 | 4  | 3  | 0 | 50 | 70 | 22303400 | 6.95E-01 | 1 |
| SMTNL1   | 923607  | 249  | 32  | 1314708  | 358848  | 0 | 5  | 2  | 0 | 50 | 61 | 18117196 | 6.95E-01 | 1 |
| ALG13    | 124127  | NaN  | 20  | 3133512  | 777504  | 0 | 5  | 0  | 0 | 11 | 10 | 6234272  | 6.95E-01 | 1 |
| CCNC     | 239824  | 619  | 10  | 782844   | 174084  | 0 | 2  | 0  | 0 | 50 | 61 | 21893644 | 6.95E-01 | 1 |
| CHMP4C   | 158801  | 681  | 12  | 609472   | 157352  | 0 | 2  | 0  | 0 | 50 | 67 | 18347172 | 6.95E-01 | 1 |
| RNFT1    | 962470  | 223  | 14  | 1136708  | 296548  | 0 | 3  | 0  | 0 | 44 | 53 | 19823504 | 6.95E-01 | 1 |
| DDO      | 248863  | 469  | 20  | 925244   | 279460  | 0 | 1  | 1  | 0 | 50 | 63 | 22854132 | 6.95E-01 | 1 |
| PLEC     | 2478735 | 247  | 25  | 12038852 | 3850852 | 0 | 34 | 10 | 0 | 20 | 45 | 17672196 | 6.95E-01 | 1 |
| ZFP1     | 647304  | 162  | 19  | 1068000  | 252048  | 0 | 1  | 0  | 0 | 50 | 54 | 22779728 | 6.95E-01 | 1 |
| NET1     | 740293  | 446  | 8   | 1603780  | 457460  | 0 | 3  | 2  | 0 | 50 | 45 | 16733424 | 6.95E-01 | 1 |
| SLMO1    | 533826  | 240  | 48  | 462444   | 122820  | 0 | 1  | 0  | 0 | 50 | 50 | 20246432 | 6.95E-01 | 1 |
| LCN1     | 327501  | 539  | 37  | 467072   | 126736  | 0 | 1  | 0  | 0 | 50 | 46 | 18874052 | 6.95E-01 | 1 |
| OR2T4    | 104321  | 936  | -39 | 868996   | 249200  | 0 | 7  | 2  | 0 | 9  | 22 | 2442516  | 6.95E-01 | 1 |
| LOXL3    | 1019591 | 315  | 50  | 1925960  | 547528  | 0 | 6  | 3  | 0 | 40 | 63 | 17658668 | 6.95E-01 | 1 |



|          |         |     |     |         |         |   |    |   |   |    |     |          |          |   |
|----------|---------|-----|-----|---------|---------|---|----|---|---|----|-----|----------|----------|---|
| HEATR1   | 461836  | 603 | 0   | 5573536 | 1487012 | 0 | 14 | 4 | 0 | 50 | 69  | 23199452 | 6.95E-01 | 1 |
| FEM1C    | 352735  | 498 | 23  | 1548956 | 435388  | 0 | 4  | 2 | 0 | 9  | 6   | 3756512  | 6.95E-01 | 1 |
| GCNT4    | 479847  | 634 | 32  | 1154152 | 300464  | 0 | 3  | 2 | 0 | 50 | 58  | 21360000 | 6.95E-01 | 1 |
| CHCHD1   | 1009357 | 191 | 42  | 306872  | 85084   | 0 | 2  | 1 | 0 | 1  | 1   | 459240   | 6.95E-01 | 1 |
| MGLL     | 587659  | 313 | 51  | 796372  | 239588  | 0 | 2  | 0 | 0 | 50 | 52  | 18414456 | 6.95E-01 | 1 |
| CCNL1    | 365148  | 610 | 22  | 1347104 | 384124  | 0 | 2  | 0 | 0 | 22 | 21  | 7975112  | 6.95E-01 | 1 |
| SHQ1     | 140728  | 510 | 21  | 1498404 | 396228  | 0 | 3  | 1 | 0 | 50 | 38  | 19715992 | 6.95E-01 | 1 |
| ENTPD7   | 422578  | 304 | 12  | 1546464 | 443220  | 0 | 4  | 1 | 0 | 50 | 65  | 25074504 | 6.96E-01 | 1 |
| L1CAM    | 2328608 | NaN | 27  | 3249924 | 896052  | 0 | 7  | 1 | 0 | 13 | 17  | 8460340  | 6.96E-01 | 1 |
| LPIN3    | 383021  | 309 | 5   | 2165904 | 645072  | 0 | 3  | 0 | 0 | 12 | 13  | 5412268  | 6.96E-01 | 1 |
| THYN1    | 270350  | 623 | 21  | 607336  | 146672  | 0 | 2  | 0 | 0 | 3  | 2   | 1141336  | 6.96E-01 | 1 |
| YEATS4   | 675242  | 361 | 13  | 611252  | 144892  | 0 | 1  | 0 | 0 | 50 | 46  | 17692132 | 6.96E-01 | 1 |
| IP6K3    | 1558308 | 328 | 34  | 1042368 | 291564  | 0 | 3  | 1 | 0 | 50 | 61  | 18849132 | 6.96E-01 | 1 |
| PLXND1   | 754944  | 210 | 53  | 4852992 | 1469568 | 0 | 11 | 7 | 0 | 50 | 51  | 17829192 | 6.96E-01 | 1 |
| ARSG     | 745529  | 225 | -8  | 1339272 | 388752  | 0 | 4  | 3 | 0 | 16 | 25  | 6612700  | 6.96E-01 | 1 |
| NUDT16L1 | 717235  | 194 | 35  | 517980  | 171948  | 0 | 1  | 1 | 0 | 50 | 55  | 22982648 | 6.96E-01 | 1 |
| OR5M1    | NaN     | NaN | NaN | 779640  | 232824  | 0 | 2  | 1 | 0 | 50 | 117 | 39878408 | 6.96E-01 | 1 |
| FOXC2    | 47545   | 445 | 10  | 1222504 | 390176  | 0 | 3  | 1 | 0 | 50 | 53  | 22234336 | 6.96E-01 | 1 |
| ELL2     | 316216  | 247 | 51  | 1653264 | 447492  | 0 | 2  | 0 | 0 | 16 | 12  | 6345344  | 6.96E-01 | 1 |
| GNAI2    | 846254  | 199 | 44  | 946604  | 237808  | 0 | 3  | 1 | 0 | 39 | 49  | 14244272 | 6.96E-01 | 1 |
| RORB     | 95756   | 913 | -21 | 1211468 | 300820  | 0 | 4  | 1 | 0 | 7  | 10  | 4011764  | 6.96E-01 | 1 |
| HIRIP3   | NaN     | NaN | NaN | 1422932 | 387328  | 0 | 7  | 3 | 0 | 26 | 43  | 11964448 | 6.96E-01 | 1 |
| TBC1D8   | 333394  | 406 | 17  | 2952308 | 784624  | 0 | 6  | 3 | 0 | 23 | 32  | 12061636 | 6.96E-01 | 1 |
| THAP1    | 594393  | 454 | 34  | 574584  | 119616  | 0 | 1  | 0 | 0 | 50 | 55  | 25462900 | 6.96E-01 | 1 |
| IMPACT   | 144714  | 390 | 16  | 870420  | 200784  | 0 | 2  | 1 | 0 | 50 | 46  | 17547596 | 6.96E-01 | 1 |
| LHX9     | 98527   | 448 | -18 | 1030264 | 296192  | 0 | 2  | 2 | 0 | 50 | 44  | 18122892 | 6.96E-01 | 1 |
| C11orf40 | 190769  | 879 | -1  | 557140  | 153080  | 0 | 1  | 0 | 0 | 50 | 51  | 19817096 | 6.96E-01 | 1 |
| IRAK1BP1 | 198307  | 832 | -13 | 659312  | 189748  | 0 | 2  | 1 | 0 | 43 | 74  | 19217948 | 6.96E-01 | 1 |
| MRGPRX3  | 631291  | 436 | 20  | 784624  | 254540  | 0 | 2  | 1 | 0 | 50 | 76  | 24807148 | 6.96E-01 | 1 |
| DTX3L    | 410045  | 404 | 35  | 1896768 | 500892  | 0 | 5  | 3 | 0 | 50 | 47  | 20160992 | 6.96E-01 | 1 |
| DDX46    | 893816  | 193 | 36  | 2706312 | 694200  | 0 | 9  | 1 | 0 | 34 | 40  | 16186964 | 6.96E-01 | 1 |
| STAT2    | 2869106 | 184 | 52  | 2223220 | 604844  | 0 | 4  | 2 | 0 | 23 | 47  | 14312980 | 6.96E-01 | 1 |
| CCNJL    | 197942  | 448 | 33  | 1093988 | 328588  | 0 | 1  | 2 | 0 | 50 | 73  | 26144284 | 6.96E-01 | 1 |

|          |         |      |     |         |         |   |    |   |   |    |    |          |          |   |
|----------|---------|------|-----|---------|---------|---|----|---|---|----|----|----------|----------|---|
| OR5B17   | 475497  | 835  | -29 | 775724  | 231400  | 0 | 3  | 1 | 0 | 50 | 60 | 16320820 | 6.96E-01 | 1 |
| TRIM74   | 826724  | 337  | 62  | 638308  | 182984  | 0 | 1  | 1 | 0 | 50 | 46 | 17329012 | 6.97E-01 | 1 |
| C8orf76  | 545561  | 171  | 22  | 989680  | 254540  | 0 | 1  | 2 | 0 | 50 | 60 | 20198016 | 6.97E-01 | 1 |
| PACS1    | 2403161 | 236  | 49  | 2477048 | 709864  | 0 | 7  | 0 | 0 | 0  | 0  | 709864   | 6.97E-01 | 1 |
| ECT2     | 301474  | 239  | 11  | 2328240 | 600216  | 0 | 5  | 1 | 0 | 34 | 35 | 14146016 | 6.97E-01 | 1 |
| NCKAP5L  | 1560163 | 231  | 56  | 3208628 | 1115704 | 0 | 8  | 4 | 0 | 32 | 42 | 13923516 | 6.97E-01 | 1 |
| PDZD3    | 1258103 | 195  | 57  | 1259528 | 406552  | 0 | 1  | 0 | 0 | 46 | 54 | 22055268 | 6.97E-01 | 1 |
| PSD4     | 630071  | 479  | 37  | 2664660 | 786048  | 0 | 6  | 0 | 0 | 10 | 9  | 4743344  | 6.97E-01 | 1 |
| OLA1     | 389793  | 418  | 26  | 1055540 | 257032  | 0 | 2  | 1 | 0 | 22 | 18 | 9008580  | 6.97E-01 | 1 |
| GSR      | 488347  | 242  | 40  | 1339272 | 389820  | 0 | 2  | 1 | 0 | 50 | 30 | 16338620 | 6.98E-01 | 1 |
| ZNF721   | 553434  | 644  | 19  | 2380928 | 588112  | 0 | 10 | 1 | 0 | 50 | 60 | 18021788 | 6.98E-01 | 1 |
| ATF7IP2  | 199617  | 364  | 9   | 1771456 | 459596  | 0 | 6  | 2 | 0 | 50 | 71 | 20969468 | 6.98E-01 | 1 |
| UBA2     | 707545  | 355  | 5   | 1689576 | 434676  | 0 | 3  | 2 | 0 | 50 | 60 | 23415544 | 6.98E-01 | 1 |
| NAGPA    | 635794  | 302  | 9   | 1297264 | 396584  | 0 | 3  | 1 | 0 | 50 | 65 | 26718156 | 6.98E-01 | 1 |
| C17orf59 | 1381225 | 202  | 37  | 836600  | 310432  | 0 | 2  | 0 | 0 | 50 | 76 | 28183808 | 6.98E-01 | 1 |
| PTPN12   | 306142  | 489  | 24  | 2051984 | 525100  | 0 | 5  | 1 | 0 | 50 | 54 | 24154244 | 6.98E-01 | 1 |
| OR5H1    | 200002  | 811  | -15 | 778216  | 225704  | 0 | 3  | 2 | 0 | 50 | 87 | 21088372 | 6.98E-01 | 1 |
| RPS5     | 1900140 | 270  | -14 | 525456  | 153792  | 0 | 1  | 0 | 0 | 50 | 64 | 20061668 | 6.98E-01 | 1 |
| ABHD6    | 611196  | 221  | 43  | 879320  | 237808  | 0 | 2  | 0 | 0 | 50 | 58 | 20830272 | 6.98E-01 | 1 |
| ZNF692   | 411701  | 567  | -4  | 1338204 | 390888  | 0 | 3  | 0 | 0 | 2  | 1  | 1058388  | 6.98E-01 | 1 |
| RPAIN    | 1145030 | 544  | 24  | 642580  | 156284  | 0 | 2  | 0 | 0 | 50 | 77 | 22011836 | 6.98E-01 | 1 |
| TIAL1    | 823029  | 217  | 22  | 1048420 | 257744  | 0 | 2  | 0 | 0 | 34 | 25 | 11162380 | 6.98E-01 | 1 |
| GMNN     | 422850  | 362  | 40  | 557496  | 140976  | 0 | 1  | 0 | 0 | 50 | 54 | 24131104 | 6.98E-01 | 1 |
| IL1RL2   | 238921  | 541  | 8   | 1499828 | 392668  | 0 | 4  | 0 | 0 | 9  | 10 | 4062672  | 6.98E-01 | 1 |
| KRT85    | 936407  | 213  | 42  | 1286584 | 375224  | 0 | 3  | 2 | 0 | 50 | 55 | 23702836 | 6.99E-01 | 1 |
| WDR25    | 410676  | 215  | 23  | 1364548 | 407264  | 0 | 4  | 1 | 0 | 6  | 4  | 2315068  | 6.99E-01 | 1 |
| TRIM31   | 1820240 | 496  | 30  | 1113212 | 285868  | 0 | 3  | 1 | 0 | 50 | 54 | 18891140 | 6.99E-01 | 1 |
| TM2D1    | 174892  | 296  | -9  | 540408  | 151656  | 0 | 1  | 1 | 0 | 34 | 33 | 14375636 | 6.99E-01 | 1 |
| MRPS30   | 87489   | 1075 | -7  | 1106092 | 322892  | 0 | 3  | 0 | 0 | 39 | 41 | 15783616 | 6.99E-01 | 1 |
| MAP4K1   | 1503183 | 363  | 27  | 2225000 | 645784  | 0 | 6  | 3 | 0 | 50 | 60 | 18913568 | 6.99E-01 | 1 |
| VRK1     | 313555  | 715  | 13  | 1072272 | 250980  | 0 | 3  | 1 | 0 | 50 | 59 | 19630908 | 6.99E-01 | 1 |
| MED7     | 166999  | 1198 | 18  | 605556  | 148452  | 0 | 1  | 0 | 0 | 50 | 43 | 19254260 | 6.99E-01 | 1 |
| GPA33    | 287664  | 611  | -1  | 826988  | 223924  | 0 | 2  | 0 | 0 | 50 | 52 | 19348956 | 6.99E-01 | 1 |

|          |         |     |     |         |         |   |    |   |   |    |     |          |          |   |
|----------|---------|-----|-----|---------|---------|---|----|---|---|----|-----|----------|----------|---|
| GRIK1    | 71816   | 904 | -14 | 2508376 | 675332  | 0 | 11 | 0 | 0 | 4  | 8   | 2661812  | 6.99E-01 | 1 |
| TCEAL8   | 455954  | NaN | 17  | 307584  | 74760   | 0 | 1  | 1 | 0 | 32 | 42  | 10453940 | 6.99E-01 | 1 |
| STAR     | 705837  | 277 | 46  | 737632  | 204344  | 0 | 1  | 1 | 0 | 50 | 54  | 23183788 | 6.99E-01 | 1 |
| STAC2    | 1426821 | 212 | 31  | 1058032 | 304736  | 0 | 3  | 1 | 0 | 50 | 55  | 19657964 | 6.99E-01 | 1 |
| CCL27    | 731413  | 298 | 51  | 294412  | 82592   | 0 | 1  | 1 | 0 | 12 | 11  | 3186200  | 6.99E-01 | 1 |
| ZNF586   | 680410  | 849 | -50 | 1035248 | 264508  | 0 | 2  | 1 | 0 | 50 | 69  | 18021076 | 6.99E-01 | 1 |
| BHLHE40  | 274112  | 183 | 33  | 1035604 | 304736  | 0 | 4  | 2 | 0 | 50 | 61  | 17470344 | 6.99E-01 | 1 |
| WDR62    | 980636  | 320 | 19  | 3880756 | 1138844 | 0 | 10 | 1 | 0 | 24 | 26  | 11494528 | 6.99E-01 | 1 |
| TMEM133  | 23524   | 920 | -24 | 320400  | 96120   | 0 | 1  | 0 | 0 | 50 | 80  | 20784348 | 6.99E-01 | 1 |
| C3orf30  | 197435  | 589 | -3  | 1360988 | 370240  | 0 | 4  | 2 | 0 | 50 | 54  | 19335784 | 6.99E-01 | 1 |
| MTL5     | 712475  | 354 | 47  | 1311860 | 359560  | 0 | 3  | 0 | 0 | 50 | 46  | 20924612 | 6.99E-01 | 1 |
| AM120AO  | 422600  | 547 | 26  | 728020  | 210752  | 0 | 1  | 0 | 0 | 18 | 25  | 6338936  | 6.99E-01 | 1 |
| GJA8     | NaN     | NaN | NaN | 1071916 | 325028  | 0 | 3  | 0 | 0 | 50 | 116 | 39970612 | 7.00E-01 | 1 |
| KAT5     | 4131934 | 202 | 53  | 1399436 | 404416  | 0 | 3  | 0 | 0 | 24 | 26  | 11885772 | 7.00E-01 | 1 |
| KRT31    | 1321356 | 424 | -6  | 1056608 | 307228  | 0 | 3  | 1 | 0 | 50 | 49  | 16872976 | 7.00E-01 | 1 |
| PIK3AP1  | 794261  | 622 | 28  | 2079040 | 571736  | 0 | 5  | 1 | 0 | 16 | 15  | 7205084  | 7.00E-01 | 1 |
| AVPR2    | 2328608 | NaN | 27  | 907088  | 314704  | 0 | 2  | 1 | 0 | 50 | 67  | 26342932 | 7.00E-01 | 1 |
| B3GNTL1  | 303219  | 483 | 14  | 953724  | 259524  | 0 | 2  | 0 | 0 | 50 | 47  | 19817452 | 7.00E-01 | 1 |
| RTAP10-1 | 874480  | 461 | 25  | 740124  | 220008  | 0 | 2  | 0 | 0 | 50 | 76  | 22638396 | 7.00E-01 | 1 |
| DYRK1A   | 314682  | 366 | 47  | 2049848 | 537916  | 0 | 6  | 2 | 0 | 50 | 58  | 19398084 | 7.00E-01 | 1 |
| CSAD     | 1729009 | 191 | 55  | 1342120 | 391244  | 0 | 2  | 1 | 0 | 50 | 55  | 18282736 | 7.00E-01 | 1 |
| RASAL1   | 518680  | 387 | 34  | 2052340 | 612320  | 0 | 7  | 2 | 0 | 50 | 55  | 20506668 | 7.00E-01 | 1 |
| FHDC1    | 227983  | 342 | 25  | 2834828 | 875404  | 0 | 7  | 3 | 0 | 42 | 39  | 17178780 | 7.00E-01 | 1 |
| C9orf172 | 1921909 | 176 | 44  | 2285164 | 844076  | 0 | 7  | 0 | 0 | 4  | 4   | 2535076  | 7.00E-01 | 1 |
| GPR18    | NaN     | NaN | NaN | 831972  | 236028  | 0 | 2  | 1 | 0 | 50 | 117 | 39881612 | 7.00E-01 | 1 |
| RTEL1    | 1110751 | 172 | 45  | 3346044 | 963336  | 0 | 10 | 3 | 0 | 11 | 11  | 4997884  | 7.00E-01 | 1 |
| RNF126   | 1832767 | 218 | 10  | 796016  | 237808  | 0 | 2  | 0 | 0 | 29 | 50  | 17004696 | 7.00E-01 | 1 |
| LARP7    | 252277  | 692 | 39  | 1548956 | 370240  | 0 | 6  | 1 | 0 | 50 | 66  | 20369252 | 7.00E-01 | 1 |
| TPM1     | 431470  | 321 | 19  | 1201500 | 295836  | 0 | 2  | 0 | 0 | 7  | 6   | 3053412  | 7.00E-01 | 1 |
| RAB3IL1  | 1998419 | 212 | 69  | 974728  | 290852  | 0 | 2  | 0 | 0 | 50 | 69  | 27604952 | 7.00E-01 | 1 |
| IQCA1    | 112916  | 599 | 11  | 2169108 | 544680  | 0 | 6  | 1 | 0 | 50 | 49  | 20578936 | 7.01E-01 | 1 |
| MAP2K3   | 415581  | 517 | -43 | 918836  | 243148  | 0 | 6  | 3 | 0 | 7  | 15  | 2788548  | 7.01E-01 | 1 |
| NIT2     | 378824  | 361 | 26  | 734428  | 193664  | 0 | 1  | 0 | 0 | 50 | 35  | 21164200 | 7.01E-01 | 1 |

|         |         |      |     |         |         |   |    |   |   |    |    |          |          |   |
|---------|---------|------|-----|---------|---------|---|----|---|---|----|----|----------|----------|---|
| HUNK    | 341416  | 624  | 12  | 1808480 | 525100  | 0 | 7  | 2 | 0 | 50 | 63 | 18144252 | 7.01E-01 | 1 |
| UNC5B   | 608276  | 559  | 34  | 2383420 | 715916  | 0 | 8  | 1 | 0 | 21 | 30 | 11994352 | 7.01E-01 | 1 |
| ZNF208  | 87537   | 1261 | -66 | 3340704 | 776436  | 0 | 14 | 2 | 0 | 13 | 23 | 5123908  | 7.01E-01 | 1 |
| GOLGA8A | 542657  | 234  | 22  | 1583132 | 416164  | 0 | 2  | 1 | 0 | 50 | 46 | 18844148 | 7.01E-01 | 1 |
| OASL    | 1225663 | 380  | 40  | 1331084 | 342472  | 0 | 4  | 2 | 0 | 50 | 68 | 17858740 | 7.01E-01 | 1 |
| UBN2    | 519766  | 345  | 29  | 3364556 | 1027060 | 0 | 11 | 3 | 0 | 50 | 55 | 19811044 | 7.01E-01 | 1 |
| FAM162B | 244987  | 581  | 14  | 405840  | 129228  | 0 | 1  | 0 | 0 | 50 | 65 | 21736648 | 7.01E-01 | 1 |
| POLD1   | 1055164 | 491  | 28  | 2800652 | 861520  | 0 | 6  | 1 | 0 | 14 | 21 | 7268096  | 7.01E-01 | 1 |
| DPY30   | 375703  | 295  | 27  | 268780  | 68708   | 0 | 1  | 1 | 0 | 4  | 3  | 1058388  | 7.01E-01 | 1 |
| IGF2R   | 653159  | 460  | 18  | 6440040 | 1745112 | 0 | 13 | 6 | 0 | 14 | 14 | 6496288  | 7.01E-01 | 1 |
| ALDH4A1 | 642600  | 453  | 27  | 1447496 | 423640  | 0 | 4  | 0 | 0 | 12 | 11 | 5041316  | 7.01E-01 | 1 |
| ACTR6   | 184664  | 650  | 9   | 1064084 | 252760  | 0 | 2  | 0 | 0 | 50 | 80 | 23899348 | 7.01E-01 | 1 |
| ACADSB  | 256010  | 673  | 17  | 1128164 | 301888  | 0 | 3  | 1 | 0 | 50 | 53 | 18719548 | 7.01E-01 | 1 |
| TNNI2   | 916434  | 481  | 33  | 508368  | 123888  | 0 | 2  | 1 | 0 | 6  | 7  | 2022792  | 7.01E-01 | 1 |
| AP3S1   | 380598  | 759  | 6   | 514420  | 128516  | 0 | 1  | 0 | 0 | 50 | 68 | 24737372 | 7.01E-01 | 1 |
| AES     | 1092464 | 195  | 30  | 706660  | 201140  | 0 | 3  | 0 | 0 | 50 | 80 | 18913212 | 7.01E-01 | 1 |
| FZD3    | 306800  | 256  | 45  | 1693136 | 465292  | 0 | 5  | 1 | 0 | 50 | 62 | 21059536 | 7.02E-01 | 1 |
| TMLHE   | 272469  | NaN  | -2  | 1215384 | 315060  | 0 | 1  | 1 | 0 | 50 | 58 | 21976592 | 7.02E-01 | 1 |
| TOPORS  | 474275  | 362  | -7  | 2620872 | 739056  | 0 | 8  | 2 | 0 | 18 | 24 | 8352472  | 7.02E-01 | 1 |
| GPC6    | 42298   | 1135 | -25 | 1428628 | 386972  | 0 | 6  | 4 | 0 | 21 | 40 | 8701352  | 7.02E-01 | 1 |
| CTRB2   | 612638  | 171  | 16  | 672484  | 203276  | 0 | 1  | 0 | 0 | 50 | 41 | 19443652 | 7.02E-01 | 1 |
| PCOLCE  | 1767777 | 242  | 60  | 1120688 | 357424  | 0 | 2  | 0 | 0 | 17 | 23 | 11241768 | 7.02E-01 | 1 |
| ACOT4   | 606300  | 169  | 39  | 1033112 | 327520  | 0 | 2  | 0 | 0 | 50 | 45 | 20608840 | 7.02E-01 | 1 |
| CEL     | 1828532 | 402  | 50  | 1872204 | 600216  | 0 | 6  | 3 | 0 | 50 | 62 | 18209756 | 7.02E-01 | 1 |
| DDX23   | 1655612 | 214  | 57  | 2113928 | 582772  | 0 | 8  | 2 | 0 | 50 | 64 | 19943476 | 7.02E-01 | 1 |
| PSMB7   | 492165  | 406  | 37  | 714136  | 208616  | 0 | 2  | 1 | 0 | 50 | 75 | 22681828 | 7.03E-01 | 1 |
| WNT4    | 434362  | 307  | 28  | 884660  | 260236  | 0 | 2  | 0 | 0 | 41 | 37 | 14867272 | 7.03E-01 | 1 |
| LTBP2   | 782985  | 242  | 42  | 4661464 | 1325744 | 0 | 9  | 1 | 0 | 5  | 4  | 3000012  | 7.03E-01 | 1 |
| LDLRAP1 | 562107  | 424  | 19  | 802068  | 222144  | 0 | 4  | 3 | 0 | 3  | 9  | 1595592  | 7.03E-01 | 1 |
| TMEM110 | 1107657 | 264  | 52  | 763620  | 213600  | 0 | 2  | 0 | 0 | 50 | 69 | 21773316 | 7.03E-01 | 1 |
| RPS27A  | 964970  | 349  | 25  | 420436  | 103952  | 0 | 1  | 0 | 0 | 50 | 65 | 19655116 | 7.03E-01 | 1 |
| CALML6  | 1434423 | 233  | 27  | 493416  | 113208  | 0 | 1  | 0 | 0 | 50 | 61 | 20095132 | 7.03E-01 | 1 |
| SERBP1  | 454341  | 466  | -6  | 1049132 | 291208  | 0 | 4  | 1 | 0 | 50 | 63 | 20567188 | 7.03E-01 | 1 |

|          |         |      |     |         |         |   |    |   |   |    |     |          |          |   |
|----------|---------|------|-----|---------|---------|---|----|---|---|----|-----|----------|----------|---|
| SYTL1    | 884974  | 188  | 30  | 1403708 | 423640  | 0 | 3  | 0 | 0 | 28 | 60  | 17682876 | 7.03E-01 | 1 |
| DDX1     | 186504  | 1386 | 10  | 1995024 | 485940  | 0 | 6  | 1 | 0 | 50 | 56  | 22216892 | 7.03E-01 | 1 |
| CDADC1   | 329994  | 399  | 53  | 1358852 | 329656  | 0 | 2  | 0 | 0 | 50 | 64  | 21335436 | 7.03E-01 | 1 |
| TBC1D29  | 488195  | 329  | 28  | 386616  | 116412  | 0 | 1  | 0 | 0 | 50 | 53  | 16914984 | 7.03E-01 | 1 |
| RABGAP1I | 235125  | 938  | 7   | 2253836 | 567820  | 0 | 6  | 2 | 0 | 50 | 55  | 22336864 | 7.03E-01 | 1 |
| MCF2L    | 789438  | 285  | 25  | 3133512 | 882168  | 0 | 7  | 2 | 0 | 39 | 52  | 20692500 | 7.03E-01 | 1 |
| C2orf76  | 193588  | 467  | 26  | 346744  | 83660   | 0 | 2  | 1 | 0 | 3  | 1   | 509080   | 7.04E-01 | 1 |
| MPO      | 838530  | 401  | 15  | 1871492 | 565684  | 0 | 4  | 3 | 0 | 50 | 70  | 19096196 | 7.04E-01 | 1 |
| PCDHA12  | NaN     | NaN  | NaN | 2300472 | 739056  | 0 | 10 | 7 | 0 | 22 | 43  | 10314032 | 7.04E-01 | 1 |
| RIBC1    | 920771  | NaN  | 70  | 1017448 | 260948  | 0 | 1  | 1 | 0 | 50 | 62  | 20770820 | 7.04E-01 | 1 |
| C22orf42 | 426151  | 580  | -16 | 674976  | 170880  | 0 | 2  | 0 | 0 | 50 | 56  | 16800352 | 7.04E-01 | 1 |
| GSTCD    | 292053  | 357  | 8   | 1640448 | 437880  | 0 | 3  | 0 | 0 | 50 | 58  | 20260316 | 7.04E-01 | 1 |
| TSHR     | 214327  | 492  | -10 | 2065868 | 567820  | 0 | 5  | 1 | 0 | 31 | 30  | 14046336 | 7.04E-01 | 1 |
| UBE2M    | 2673870 | 276  | 11  | 486652  | 124244  | 0 | 3  | 2 | 0 | 3  | 7   | 1419728  | 7.04E-01 | 1 |
| TMEM108  | 418705  | 773  | 10  | 1382348 | 484516  | 0 | 3  | 2 | 0 | 50 | 71  | 23415188 | 7.04E-01 | 1 |
| ZNF605   | 1014082 | 674  | 11  | 1756148 | 412960  | 0 | 6  | 0 | 0 | 19 | 19  | 9013208  | 7.04E-01 | 1 |
| FRMD3    | 494570  | 610  | -26 | 1571740 | 399788  | 0 | 5  | 0 | 0 | 50 | 47  | 17790388 | 7.04E-01 | 1 |
| MAG      | 767180  | 472  | 8   | 1593100 | 495908  | 0 | 4  | 2 | 0 | 50 | 43  | 16821356 | 7.04E-01 | 1 |
| LYPD4    | 1360684 | 454  | 23  | 625848  | 180492  | 0 | 2  | 0 | 0 | 50 | 69  | 18698900 | 7.04E-01 | 1 |
| MSL2     | 206721  | 398  | 16  | 1440020 | 416164  | 0 | 4  | 1 | 0 | 50 | 49  | 17863724 | 7.04E-01 | 1 |
| TAPBP    | 1456953 | 262  | 30  | 1241016 | 417588  | 0 | 4  | 1 | 0 | 50 | 71  | 20945260 | 7.04E-01 | 1 |
| LRAT     | 73491   | 1036 | -3  | 570668  | 176932  | 0 | 2  | 2 | 0 | 8  | 18  | 4906748  | 7.04E-01 | 1 |
| CEP68    | 647041  | 340  | 38  | 1856540 | 597724  | 0 | 8  | 1 | 0 | 6  | 10  | 2940916  | 7.05E-01 | 1 |
| CRBN     | 61304   | 1017 | -8  | 1177292 | 286936  | 0 | 3  | 0 | 0 | 50 | 64  | 21277052 | 7.05E-01 | 1 |
| PRKAR2A  | 1694388 | 196  | 44  | 1058744 | 281596  | 0 | 4  | 0 | 0 | 37 | 60  | 17081236 | 7.05E-01 | 1 |
| MTNR1B   | 55111   | 742  | -18 | 887864  | 280528  | 0 | 1  | 2 | 0 | 50 | 80  | 23488880 | 7.05E-01 | 1 |
| DNASE1L2 | 685716  | 150  | 45  | 814172  | 202564  | 0 | 4  | 2 | 0 | 2  | 4   | 814528   | 7.05E-01 | 1 |
| C2orf54  | 1187158 | 297  | 30  | 1108940 | 358492  | 0 | 3  | 0 | 0 | 50 | 60  | 21100120 | 7.05E-01 | 1 |
| CUX2     | 493539  | 608  | 39  | 3707740 | 1146320 | 0 | 11 | 6 | 0 | 48 | 63  | 19897552 | 7.05E-01 | 1 |
| ZNF831   | 876466  | 202  | 15  | 4034904 | 1358496 | 0 | 18 | 8 | 0 | 6  | 9   | 2732656  | 7.05E-01 | 1 |
| OR2L2    | 20939   | 1015 | -27 | 776792  | 230332  | 0 | 4  | 1 | 0 | 50 | 119 | 22654060 | 7.05E-01 | 1 |
| RFX6     | 206546  | 730  | -19 | 2406916 | 648632  | 0 | 9  | 0 | 0 | 0  | 0   | 648632   | 7.05E-01 | 1 |
| ZNF124   | 374414  | 704  | -12 | 765756  | 176220  | 0 | 2  | 1 | 0 | 50 | 64  | 19760848 | 7.05E-01 | 1 |

|          |         |      |     |         |         |   |    |   |   |    |    |          |          |   |
|----------|---------|------|-----|---------|---------|---|----|---|---|----|----|----------|----------|---|
| ZNF19    | 443039  | 600  | 18  | 1187260 | 300464  | 0 | 3  | 1 | 0 | 50 | 67 | 18330440 | 7.06E-01 | 1 |
| ISY1     | 1142757 | 352  | 44  | 769316  | 189748  | 0 | 1  | 1 | 0 | 50 | 78 | 19071632 | 7.06E-01 | 1 |
| CLDN18   | 160932  | 572  | 6   | 845144  | 252760  | 0 | 2  | 0 | 0 | 50 | 56 | 20671140 | 7.06E-01 | 1 |
| RPS4Y2   | 0       | 0    | 0   | 681028  | 190460  | 0 | 1  | 0 | 0 | 50 | 39 | 21173456 | 7.06E-01 | 1 |
| CTSB     | 470951  | 301  | 42  | 898544  | 229264  | 0 | 2  | 0 | 0 | 38 | 43 | 17149232 | 7.06E-01 | 1 |
| GBA      | 1574928 | 194  | 45  | 1377720 | 394092  | 0 | 4  | 1 | 0 | 50 | 57 | 20795740 | 7.06E-01 | 1 |
| ARL3     | 878626  | 180  | 27  | 481668  | 126024  | 0 | 1  | 0 | 0 | 50 | 59 | 20336144 | 7.06E-01 | 1 |
| TCEAL1   | 490345  | NaN  | 31  | 412248  | 104664  | 0 | 1  | 0 | 0 | 50 | 66 | 22114364 | 7.06E-01 | 1 |
| RPL11    | 960799  | 225  | 28  | 476684  | 122464  | 0 | 1  | 0 | 0 | 50 | 55 | 20574664 | 7.06E-01 | 1 |
| OR56A3   | 262387  | 914  | -13 | 770740  | 239588  | 0 | 2  | 2 | 0 | 44 | 44 | 14880444 | 7.06E-01 | 1 |
| TBC1D1   | 156977  | 578  | 48  | 3014608 | 812036  | 0 | 14 | 7 | 0 | 8  | 15 | 3445012  | 7.06E-01 | 1 |
| NFKBIB   | 1989663 | 219  | 30  | 963336  | 255252  | 0 | 3  | 1 | 0 | 50 | 70 | 21843448 | 7.06E-01 | 1 |
| CIB4     | 1039210 | 428  | 29  | 504096  | 119616  | 0 | 1  | 0 | 0 | 50 | 58 | 21568616 | 7.06E-01 | 1 |
| C16orf71 | 717235  | 194  | 35  | 1310436 | 397296  | 0 | 3  | 3 | 0 | 31 | 31 | 12704572 | 7.06E-01 | 1 |
| CACNA1H  | 1275017 | 294  | 21  | 5845164 | 1842300 | 0 | 8  | 2 | 0 | 4  | 2  | 2970820  | 7.06E-01 | 1 |
| SLC16A2  | 357915  | NaN  | 14  | 1523324 | 465292  | 0 | 3  | 1 | 0 | 50 | 64 | 23309456 | 7.06E-01 | 1 |
| CTEX1D1  | 335045  | 692  | -16 | 475260  | 118548  | 0 | 1  | 0 | 0 | 50 | 58 | 17879032 | 7.06E-01 | 1 |
| PMM2     | 401569  | 247  | -2  | 661804  | 161624  | 0 | 1  | 2 | 0 | 3  | 4  | 1412608  | 7.06E-01 | 1 |
| KRT10    | 836683  | 269  | -10 | 1464584 | 446068  | 0 | 5  | 2 | 0 | 22 | 26 | 7229292  | 7.06E-01 | 1 |
| UBE3A    | 241743  | 1263 | -34 | 2298692 | 580636  | 0 | 10 | 0 | 0 | 4  | 12 | 3595600  | 7.06E-01 | 1 |
| CLEC4G   | 688482  | 384  | 31  | 764688  | 213600  | 0 | 2  | 1 | 0 | 50 | 67 | 22649432 | 7.06E-01 | 1 |
| ITGAM    | 1163323 | 478  | 7   | 2975092 | 848348  | 0 | 11 | 6 | 0 | 22 | 30 | 9171272  | 7.06E-01 | 1 |
| SYDE1    | 703673  | 419  | 1   | 1765404 | 624780  | 0 | 2  | 0 | 0 | 50 | 38 | 17686080 | 7.07E-01 | 1 |
| SERPINF2 | 1447501 | 189  | 32  | 1256680 | 368816  | 0 | 2  | 0 | 0 | 44 | 62 | 19487440 | 7.07E-01 | 1 |
| DOCK9    | 435646  | 494  | 27  | 5621952 | 1448208 | 0 | 14 | 2 | 0 | 21 | 16 | 8794980  | 7.07E-01 | 1 |
| NLRP6    | 1463610 | 437  | 24  | 2163412 | 726596  | 0 | 4  | 0 | 0 | 6  | 2  | 2533652  | 7.07E-01 | 1 |
| FAHD2B   | 515149  | 535  | 38  | 804916  | 234248  | 0 | 2  | 1 | 0 | 50 | 66 | 22337220 | 7.07E-01 | 1 |
| KRT18    | 1635177 | 181  | 43  | 1088292 | 323604  | 0 | 3  | 0 | 0 | 37 | 46 | 15752644 | 7.07E-01 | 1 |
| LTA      | 2517285 | 220  | 35  | 507300  | 165540  | 0 | 1  | 0 | 0 | 50 | 55 | 21824936 | 7.07E-01 | 1 |
| DHRS2    | 1299548 | 595  | 26  | 798508  | 200072  | 0 | 3  | 1 | 0 | 50 | 74 | 20710300 | 7.07E-01 | 1 |
| SPINK5   | 68058   | 390  | -10 | 2986484 | 677824  | 0 | 7  | 1 | 0 | 24 | 25 | 10751912 | 7.07E-01 | 1 |
| TIMM23   | 404636  | 579  | 39  | 541832  | 156640  | 0 | 1  | 1 | 0 | 50 | 55 | 20910372 | 7.07E-01 | 1 |
| NT5C2    | 562038  | 150  | 47  | 1500540 | 372732  | 0 | 2  | 2 | 0 | 50 | 48 | 17844500 | 7.07E-01 | 1 |

|          |         |      |     |         |        |   |   |   |   |    |     |          |          |   |
|----------|---------|------|-----|---------|--------|---|---|---|---|----|-----|----------|----------|---|
| AFM      | 331900  | 594  | 3   | 1605204 | 379140 | 0 | 5 | 2 | 0 | 50 | 56  | 21463596 | 7.07E-01 | 1 |
| RPUSD3   | 953772  | 264  | 43  | 870420  | 293700 | 0 | 2 | 1 | 0 | 50 | 72  | 27173124 | 7.07E-01 | 1 |
| RNF38    | 564580  | 248  | 40  | 1315064 | 385192 | 0 | 1 | 0 | 0 | 16 | 15  | 8610572  | 7.07E-01 | 1 |
| PSMB4    | 1322568 | 174  | 42  | 677468  | 199360 | 0 | 2 | 1 | 0 | 50 | 77  | 23375672 | 7.07E-01 | 1 |
| BTBD17   | 362227  | 433  | -8  | 1145608 | 397652 | 0 | 1 | 2 | 0 | 50 | 67  | 25396328 | 7.07E-01 | 1 |
| RBM6     | 1079795 | 152  | 39  | 2924184 | 762552 | 0 | 9 | 1 | 0 | 14 | 30  | 9290532  | 7.07E-01 | 1 |
| SLC25A26 | 85846   | 616  | 0   | 551800  | 158420 | 0 | 1 | 0 | 0 | 50 | 54  | 20785416 | 7.07E-01 | 1 |
| CD8A     | 330931  | 543  | 19  | 586332  | 191172 | 0 | 2 | 1 | 0 | 11 | 11  | 3300476  | 7.07E-01 | 1 |
| ZNF699   | 401242  | 705  | -65 | 1676048 | 401212 | 0 | 7 | 2 | 0 | 50 | 125 | 30656940 | 7.08E-01 | 1 |
| IL5RA    | 59117   | 1039 | -15 | 1128876 | 288360 | 0 | 4 | 0 | 0 | 26 | 36  | 10639060 | 7.08E-01 | 1 |
| SFT2D2   | 442995  | 299  | 18  | 430404  | 117480 | 0 | 1 | 0 | 0 | 50 | 57  | 19929948 | 7.08E-01 | 1 |
| ABI3BP   | 459170  | 548  | -1  | 2829132 | 765756 | 0 | 9 | 1 | 0 | 16 | 25  | 8890744  | 7.08E-01 | 1 |
| LPCAT2   | 119965  | 430  | -29 | 1401928 | 399788 | 0 | 3 | 0 | 0 | 13 | 31  | 7830576  | 7.08E-01 | 1 |
| TRIM25   | 320339  | 324  | -38 | 1610900 | 447136 | 0 | 5 | 3 | 0 | 43 | 83  | 19922828 | 7.08E-01 | 1 |
| RAB39B   | 371405  | NaN  | -13 | 535068  | 154860 | 0 | 1 | 0 | 0 | 50 | 60  | 21240384 | 7.08E-01 | 1 |
| ENTPD8   | 1591716 | 213  | 30  | 1239592 | 388040 | 0 | 4 | 1 | 0 | 50 | 64  | 20302324 | 7.08E-01 | 1 |
| ZNF233   | 618477  | 671  | -31 | 1755080 | 411892 | 0 | 4 | 1 | 0 | 50 | 57  | 18064864 | 7.08E-01 | 1 |
| TOM1L1   | 131125  | 869  | -61 | 1268784 | 322536 | 0 | 4 | 1 | 0 | 50 | 51  | 18003276 | 7.08E-01 | 1 |
| CA9      | 1202125 | 248  | 37  | 1153796 | 364900 | 0 | 3 | 1 | 0 | 50 | 57  | 20786840 | 7.08E-01 | 1 |
| MTMR2    | 285979  | 390  | -1  | 1673200 | 449984 | 0 | 4 | 1 | 0 | 50 | 52  | 23754812 | 7.08E-01 | 1 |
| SGK1     | 97901   | 129  | 15  | 1692068 | 440728 | 0 | 4 | 4 | 0 | 34 | 41  | 12078012 | 7.08E-01 | 1 |
| FLRT1    | NaN     | NaN  | NaN | 1626920 | 540052 | 0 | 3 | 1 | 0 | 50 | 117 | 40185636 | 7.09E-01 | 1 |
| NKIRAS1  | 399346  | 319  | 6   | 500892  | 130296 | 0 | 1 | 0 | 0 | 50 | 53  | 22341848 | 7.09E-01 | 1 |
| C16orf45 | 544403  | 200  | 30  | 594164  | 147028 | 0 | 2 | 0 | 0 | 50 | 82  | 20960568 | 7.09E-01 | 1 |
| RHBDF2   | 1202221 | 197  | 29  | 2187264 | 631188 | 0 | 4 | 1 | 0 | 7  | 6   | 3655052  | 7.09E-01 | 1 |
| DVL1     | 1744013 | 273  | 28  | 1703104 | 508724 | 0 | 4 | 0 | 0 | 9  | 14  | 4108596  | 7.09E-01 | 1 |
| NRTN     | 1217326 | 294  | 35  | 459596  | 179068 | 0 | 1 | 0 | 0 | 50 | 56  | 18189820 | 7.09E-01 | 1 |
| TMPRSS4  | 579148  | 447  | 50  | 1152016 | 302600 | 0 | 5 | 4 | 0 | 4  | 12  | 2537924  | 7.09E-01 | 1 |
| SIGLEC11 | 1679101 | 205  | 45  | 1746892 | 537560 | 0 | 3 | 1 | 0 | 4  | 3   | 2137424  | 7.09E-01 | 1 |
| RTKN2    | 111669  | 382  | 9   | 1600220 | 403348 | 0 | 4 | 2 | 0 | 50 | 55  | 22389196 | 7.09E-01 | 1 |
| LGALS12  | 887496  | 459  | 31  | 860096  | 257032 | 0 | 2 | 0 | 0 | 50 | 61  | 22549396 | 7.09E-01 | 1 |
| GMIP     | 768855  | 418  | -10 | 2436820 | 759704 | 0 | 8 | 2 | 0 | 29 | 30  | 10641908 | 7.09E-01 | 1 |
| CENPP    | 558433  | 574  | 45  | 758636  | 199360 | 0 | 2 | 0 | 0 | 50 | 60  | 20281676 | 7.09E-01 | 1 |

|          |         |      |     |         |        |   |    |   |   |    |    |          |          |   |
|----------|---------|------|-----|---------|--------|---|----|---|---|----|----|----------|----------|---|
| STAP1    | 128996  | 689  | 35  | 789964  | 194732 | 0 | 2  | 0 | 0 | 50 | 68 | 23467520 | 7.09E-01 | 1 |
| HS6ST2   | 126179  | NaN  | 16  | 1280888 | 346744 | 0 | 2  | 0 | 0 | 50 | 76 | 24196608 | 7.09E-01 | 1 |
| PPP5C    | 1079866 | 357  | 39  | 1320048 | 335352 | 0 | 6  | 2 | 0 | 50 | 75 | 18027128 | 7.09E-01 | 1 |
| FILIP1L  | 267848  | 573  | 10  | 2922760 | 760772 | 0 | 6  | 2 | 0 | 50 | 46 | 20143192 | 7.09E-01 | 1 |
| ATP5G1   | 757963  | 239  | 29  | 350660  | 107512 | 0 | 1  | 1 | 0 | 13 | 21 | 5325404  | 7.09E-01 | 1 |
| BRD2     | 1276842 | 431  | 40  | 2028844 | 587756 | 0 | 17 | 4 | 0 | 3  | 7  | 1166256  | 7.09E-01 | 1 |
| MBD2     | 98718   | 437  | 6   | 1200432 | 368460 | 0 | 1  | 2 | 0 | 50 | 42 | 16743392 | 7.10E-01 | 1 |
| CCDC82   | 272687  | 372  | 14  | 1451412 | 324672 | 0 | 4  | 0 | 0 | 43 | 56 | 20415532 | 7.10E-01 | 1 |
| C11orf70 | 420989  | 358  | -16 | 605200  | 153080 | 0 | 1  | 0 | 0 | 50 | 45 | 21324756 | 7.10E-01 | 1 |
| SNAI2    | 16597   | 598  | -22 | 684588  | 185832 | 0 | 2  | 0 | 0 | 50 | 63 | 19278468 | 7.10E-01 | 1 |
| SLC4A7   | 110819  | 413  | -3  | 3137072 | 860452 | 0 | 8  | 2 | 0 | 50 | 55 | 22816040 | 7.10E-01 | 1 |
| PIGW     | 416822  | 556  | 23  | 1246712 | 375580 | 0 | 4  | 1 | 0 | 50 | 74 | 27633432 | 7.10E-01 | 1 |
| CSRNP1   | 213514  | 500  | 30  | 1461380 | 446068 | 0 | 3  | 0 | 0 | 21 | 31 | 10103992 | 7.10E-01 | 1 |
| EPOR     | 1385739 | 197  | 31  | 1255968 | 404772 | 0 | 3  | 1 | 0 | 50 | 60 | 22230420 | 7.10E-01 | 1 |
| RCOR1    | 1468114 | 190  | 42  | 1262732 | 331792 | 0 | 2  | 0 | 0 | 50 | 94 | 31610308 | 7.10E-01 | 1 |
| MED15    | 474817  | 286  | 44  | 2040948 | 561768 | 0 | 7  | 0 | 0 | 1  | 0  | 856892   | 7.10E-01 | 1 |
| WBP11    | 340728  | 578  | -4  | 1625496 | 478464 | 0 | 8  | 0 | 0 | 1  | 1  | 700252   | 7.10E-01 | 1 |
| KRT32    | 1445853 | 325  | -22 | 1138488 | 327876 | 0 | 3  | 1 | 0 | 50 | 58 | 19098688 | 7.10E-01 | 1 |
| PPM1M    | 1114737 | 181  | 52  | 769316  | 218584 | 0 | 2  | 0 | 0 | 50 | 71 | 22668656 | 7.10E-01 | 1 |
| GATA2    | 937778  | 274  | 52  | 1187260 | 375224 | 0 | 3  | 0 | 0 | 38 | 43 | 15428328 | 7.10E-01 | 1 |
| OR5K2    | 390532  | 796  | 2   | 785692  | 228908 | 0 | 4  | 1 | 0 | 2  | 2  | 680316   | 7.10E-01 | 1 |
| BCCIP    | 206845  | 738  | -4  | 1022788 | 259880 | 0 | 2  | 0 | 0 | 23 | 17 | 8027088  | 7.10E-01 | 1 |
| GPR31    | 149346  | 696  | 40  | 759348  | 264864 | 0 | 3  | 3 | 0 | 13 | 19 | 4900696  | 7.11E-01 | 1 |
| SPERT    | 813295  | 613  | 47  | 1118908 | 330368 | 0 | 3  | 0 | 0 | 50 | 51 | 22342560 | 7.11E-01 | 1 |
| SH3PXD2A | 539433  | 300  | 35  | 2771460 | 827700 | 0 | 8  | 2 | 0 | 27 | 33 | 11343584 | 7.11E-01 | 1 |
| RPS4Y1   | 0       | 0    | 0   | 682452  | 193308 | 0 | 1  | 0 | 0 | 50 | 39 | 21173456 | 7.11E-01 | 1 |
| ZNF780A  | 1181917 | 521  | 22  | 1829484 | 438948 | 0 | 6  | 0 | 0 | 49 | 74 | 22707460 | 7.11E-01 | 1 |
| LHFPL4   | 858637  | 425  | 36  | 614812  | 188324 | 0 | 1  | 0 | 0 | 50 | 51 | 22245372 | 7.11E-01 | 1 |
| CDH19    | 6200    | 1015 | -45 | 1996804 | 522608 | 0 | 10 | 2 | 0 | 29 | 51 | 11619484 | 7.11E-01 | 1 |
| OR4D9    | 430021  | 507  | -1  | 767180  | 239944 | 0 | 2  | 2 | 0 | 50 | 65 | 21241096 | 7.11E-01 | 1 |
| PLXDC1   | 1452583 | 212  | 26  | 1306164 | 354576 | 0 | 2  | 0 | 0 | 20 | 9  | 6232492  | 7.11E-01 | 1 |
| GEN1     | 135007  | 1245 | 10  | 2373452 | 594520 | 0 | 6  | 1 | 0 | 50 | 52 | 22598524 | 7.11E-01 | 1 |
| RALGDS   | 1852158 | 322  | 51  | 2332512 | 695268 | 0 | 4  | 4 | 0 | 50 | 60 | 19926388 | 7.11E-01 | 1 |



|          |         |      |     |         |         |   |    |   |   |    |     |          |          |   |
|----------|---------|------|-----|---------|---------|---|----|---|---|----|-----|----------|----------|---|
| SEC22B   | 738180  | 388  | 24  | 561768  | 147384  | 0 | 1  | 0 | 0 | 50 | 68  | 29309480 | 7.11E-01 | 1 |
| TNFRSF14 | 339388  | 228  | 38  | 734428  | 205412  | 0 | 1  | 1 | 0 | 50 | 44  | 17226128 | 7.11E-01 | 1 |
| OR51F2   | 66543   | 987  | -3  | 840516  | 256320  | 0 | 3  | 2 | 0 | 50 | 67  | 17575720 | 7.12E-01 | 1 |
| SH2D2A   | 1649536 | 208  | 53  | 1010684 | 307228  | 0 | 3  | 1 | 0 | 50 | 69  | 21716356 | 7.12E-01 | 1 |
| SPANXB1  | NaN     | NaN  | NaN | 540408  | 140976  | 0 | 1  | 0 | 0 | 50 | 116 | 39786560 | 7.12E-01 | 1 |
| LCN9     | 362222  | 524  | 29  | 461732  | 119260  | 0 | 2  | 1 | 0 | 3  | 3   | 1017804  | 7.12E-01 | 1 |
| MRI1     | 767214  | 289  | 6   | 978288  | 330012  | 0 | 1  | 2 | 0 | 50 | 92  | 27852728 | 7.12E-01 | 1 |
| GRM1     | 92600   | 941  | -13 | 3032764 | 897476  | 0 | 15 | 3 | 0 | 5  | 12  | 2901756  | 7.12E-01 | 1 |
| HERC4    | 337983  | 246  | 12  | 2767544 | 724816  | 0 | 6  | 0 | 0 | 5  | 3   | 2464232  | 7.12E-01 | 1 |
| CHMP2B   | 57851   | 415  | -19 | 569956  | 137060  | 0 | 1  | 0 | 0 | 50 | 45  | 17728800 | 7.12E-01 | 1 |
| RETSAT   | 975949  | 211  | 18  | 1537564 | 462800  | 0 | 4  | 1 | 0 | 9  | 4   | 2652200  | 7.12E-01 | 1 |
| KRT28    | 836683  | 269  | -10 | 1184412 | 337488  | 0 | 4  | 1 | 0 | 22 | 26  | 7229292  | 7.12E-01 | 1 |
| SECTM1   | 2856070 | 193  | 24  | 622644  | 192240  | 0 | 1  | 0 | 0 | 50 | 47  | 19854120 | 7.12E-01 | 1 |
| TOMM34   | 952219  | 282  | 32  | 799932  | 218940  | 0 | 4  | 3 | 0 | 6  | 9   | 2311152  | 7.12E-01 | 1 |
| OR11G2   | 371813  | 563  | -29 | 846212  | 260236  | 0 | 3  | 1 | 0 | 50 | 77  | 20304460 | 7.12E-01 | 1 |
| SVIL     | 138938  | 504  | 1   | 5656484 | 1589896 | 0 | 25 | 6 | 0 | 8  | 11  | 3212900  | 7.12E-01 | 1 |
| SUZ12    | 717248  | 310  | 27  | 1943404 | 491636  | 0 | 4  | 2 | 0 | 37 | 35  | 18723108 | 7.12E-01 | 1 |
| OR10AD1  | 511392  | 352  | 32  | 786760  | 232112  | 0 | 2  | 1 | 0 | 50 | 55  | 18729516 | 7.12E-01 | 1 |
| ANKRD30  | 53742   | 1067 | -43 | 3609840 | 837312  | 0 | 16 | 2 | 0 | 4  | 7   | 2518700  | 7.12E-01 | 1 |
| NHEJ1    | 798168  | 177  | 37  | 775368  | 213600  | 0 | 2  | 1 | 0 | 50 | 46  | 15760120 | 7.12E-01 | 1 |
| SERTAD4  | 178673  | 440  | -8  | 909580  | 247064  | 0 | 2  | 0 | 0 | 50 | 49  | 20032476 | 7.12E-01 | 1 |
| JAKMIP2  | 102729  | 642  | -4  | 2150596 | 529016  | 0 | 3  | 1 | 0 | 50 | 43  | 21155656 | 7.12E-01 | 1 |
| TBC1D15  | 219208  | 563  | -9  | 1956220 | 470276  | 0 | 7  | 2 | 0 | 50 | 69  | 22507032 | 7.12E-01 | 1 |
| SLFNL1   | 341851  | 171  | 29  | 1008904 | 311144  | 0 | 3  | 1 | 0 | 6  | 8   | 3210052  | 7.12E-01 | 1 |
| TTC9B    | 1005838 | 400  | 30  | 583484  | 197224  | 0 | 1  | 1 | 0 | 50 | 48  | 18018940 | 7.12E-01 | 1 |
| NPHP1    | NaN     | NaN  | NaN | 1935216 | 499824  | 0 | 6  | 0 | 0 | 50 | 116 | 40145408 | 7.12E-01 | 1 |
| ARL4C    | 121224  | 608  | 15  | 474548  | 143824  | 0 | 2  | 2 | 0 | 7  | 9   | 2255260  | 7.12E-01 | 1 |
| INTS6    | 219283  | 371  | 38  | 2309372 | 615880  | 0 | 6  | 0 | 0 | 5  | 9   | 3657188  | 7.13E-01 | 1 |
| AK1      | 1278941 | 201  | 51  | 505876  | 144536  | 0 | 1  | 0 | 0 | 50 | 53  | 22309808 | 7.13E-01 | 1 |
| FAM47C   | 71087   | NaN  | -10 | 2497340 | 824140  | 0 | 8  | 2 | 0 | 40 | 78  | 26924280 | 7.13E-01 | 1 |
| ZNF17    | 451095  | 869  | -24 | 1717344 | 415452  | 0 | 6  | 1 | 0 | 50 | 68  | 17938840 | 7.13E-01 | 1 |
| FBXO17   | 1794625 | 282  | 21  | 718764  | 225348  | 0 | 2  | 0 | 0 | 28 | 34  | 11289116 | 7.13E-01 | 1 |
| MPPED2   | 29166   | 1075 | -21 | 816664  | 224636  | 0 | 3  | 0 | 0 | 50 | 82  | 20482104 | 7.13E-01 | 1 |

|          |         |     |     |         |         |   |    |   |   |    |     |          |          |   |
|----------|---------|-----|-----|---------|---------|---|----|---|---|----|-----|----------|----------|---|
| INPP5A   | 155331  | 452 | 12  | 1118908 | 272696  | 0 | 5  | 2 | 0 | 6  | 16  | 4149180  | 7.13E-01 | 1 |
| C9orf85  | 284245  | 358 | 5   | 430404  | 88644   | 0 | 1  | 1 | 0 | 24 | 28  | 9605948  | 7.13E-01 | 1 |
| HIST1H4I | 227588  | 622 | 29  | 248844  | 86508   | 0 | 6  | 3 | 0 | 4  | 8   | 497688   | 7.13E-01 | 1 |
| PRR7     | 1038665 | 261 | 59  | 663940  | 221432  | 0 | 2  | 1 | 0 | 12 | 17  | 5103260  | 7.13E-01 | 1 |
| UGT1A1   | NaN     | NaN | NaN | 1340340 | 389820  | 0 | 2  | 1 | 0 | 50 | 117 | 40035404 | 7.13E-01 | 1 |
| LILRB5   | 717623  | 458 | -6  | 1490572 | 457460  | 0 | 5  | 1 | 0 | 50 | 58  | 18028196 | 7.13E-01 | 1 |
| RPN2     | 787991  | 404 | 44  | 1816312 | 548240  | 0 | 3  | 2 | 0 | 50 | 64  | 22911804 | 7.13E-01 | 1 |
| LDHC     | 599909  | 176 | 42  | 861164  | 235672  | 0 | 3  | 2 | 0 | 5  | 12  | 3796384  | 7.13E-01 | 1 |
| YIPF4    | 396035  | 325 | 23  | 622288  | 184052  | 0 | 1  | 0 | 0 | 50 | 48  | 23365704 | 7.13E-01 | 1 |
| HIST1H3H | 267617  | 634 | 32  | 333216  | 110004  | 0 | 3  | 2 | 0 | 12 | 20  | 2202928  | 7.14E-01 | 1 |
| MRS2     | 399209  | 465 | 7   | 1144896 | 320400  | 0 | 3  | 0 | 0 | 50 | 48  | 18933504 | 7.14E-01 | 1 |
| SLC45A2  | 268032  | 863 | 8   | 1346748 | 398364  | 0 | 3  | 3 | 0 | 50 | 67  | 19262804 | 7.14E-01 | 1 |
| KRT17    | 1494501 | 323 | 11  | 1094700 | 322536  | 0 | 4  | 0 | 0 | 20 | 34  | 10955900 | 7.14E-01 | 1 |
| TMC4     | 735613  | 439 | -53 | 1761844 | 582416  | 0 | 7  | 3 | 0 | 18 | 36  | 7425804  | 7.14E-01 | 1 |
| UBFD1    | 528849  | 628 | 48  | 797796  | 221076  | 0 | 2  | 0 | 0 | 44 | 46  | 16041716 | 7.14E-01 | 1 |
| NUAK2    | 664542  | 178 | 30  | 1562128 | 478820  | 0 | 5  | 1 | 0 | 3  | 2   | 1248492  | 7.14E-01 | 1 |
| ARHGAP19 | 945635  | 397 | 26  | 1291212 | 343896  | 0 | 5  | 2 | 0 | 50 | 76  | 23133592 | 7.14E-01 | 1 |
| TAS2R1   | 349235  | 840 | -18 | 743328  | 217872  | 0 | 2  | 1 | 0 | 50 | 69  | 19638384 | 7.14E-01 | 1 |
| CXCR3    | 947642  | NaN | 52  | 1002496 | 351728  | 0 | 3  | 0 | 0 | 38 | 47  | 15669696 | 7.14E-01 | 1 |
| TIGD6    | 1070181 | 149 | 44  | 1319692 | 357068  | 0 | 1  | 1 | 0 | 50 | 53  | 22084104 | 7.14E-01 | 1 |
| RIN2     | 213905  | 508 | 0   | 2267720 | 647920  | 0 | 6  | 3 | 0 | 22 | 29  | 10278432 | 7.14E-01 | 1 |
| MYL10    | 653305  | 246 | 45  | 601284  | 155928  | 0 | 1  | 0 | 0 | 50 | 55  | 22143556 | 7.14E-01 | 1 |
| ASCL3    | 548433  | 243 | 21  | 456036  | 133500  | 0 | 1  | 0 | 0 | 50 | 57  | 20741984 | 7.14E-01 | 1 |
| FXR2     | 2013497 | 194 | 29  | 1635820 | 487364  | 0 | 5  | 1 | 0 | 42 | 59  | 19296980 | 7.14E-01 | 1 |
| FCTEX1D4 | 574317  | 191 | 43  | 520116  | 199716  | 0 | 1  | 0 | 0 | 50 | 62  | 20422296 | 7.14E-01 | 1 |
| UBAP2    | 777874  | 170 | 29  | 2866868 | 841228  | 0 | 9  | 2 | 0 | 3  | 2   | 1578148  | 7.14E-01 | 1 |
| ABCB1    | 287293  | 822 | 0   | 3300476 | 919192  | 0 | 8  | 3 | 0 | 50 | 49  | 19764764 | 7.15E-01 | 1 |
| KLK10    | 490795  | 632 | 22  | 691708  | 220364  | 0 | 2  | 1 | 0 | 50 | 58  | 16739120 | 7.15E-01 | 1 |
| EIF2S3   | 528219  | NaN | 41  | 1219300 | 345320  | 0 | 4  | 0 | 0 | 50 | 78  | 28181316 | 7.15E-01 | 1 |
| IKZF4    | 2693176 | 215 | 38  | 1474552 | 432896  | 0 | 2  | 0 | 0 | 42 | 42  | 15617720 | 7.15E-01 | 1 |
| TAB3     | 81645   | NaN | 13  | 1798512 | 515844  | 0 | 5  | 1 | 0 | 4  | 4   | 1980428  | 7.15E-01 | 1 |
| FBXL4    | 237914  | 891 | -6  | 1582776 | 440016  | 0 | 3  | 1 | 0 | 50 | 55  | 20394528 | 7.15E-01 | 1 |
| GCN1L1   | 1586296 | 225 | 52  | 6757948 | 2048780 | 0 | 17 | 4 | 0 | 9  | 16  | 6486676  | 7.15E-01 | 1 |

|           |         |     |     |         |         |   |    |   |   |    |     |          |          |   |
|-----------|---------|-----|-----|---------|---------|---|----|---|---|----|-----|----------|----------|---|
| C14orf169 | NaN     | NaN | NaN | 1550736 | 505164  | 0 | 5  | 1 | 0 | 50 | 117 | 40150748 | 7.15E-01 | 1 |
| PLEKHM3   | 331278  | 370 | 20  | 1945540 | 521540  | 0 | 4  | 2 | 0 | 50 | 50  | 24634132 | 7.15E-01 | 1 |
| ZFC3H1    | 259684  | 393 | -11 | 5176596 | 1344612 | 0 | 11 | 1 | 0 | 13 | 7   | 5790696  | 7.15E-01 | 1 |
| IL26      | 325920  | 623 | 5   | 459952  | 110360  | 0 | 1  | 0 | 0 | 50 | 71  | 21956656 | 7.15E-01 | 1 |
| PUF60     | 2279638 | 229 | 25  | 1421152 | 422216  | 0 | 4  | 2 | 0 | 50 | 72  | 27190568 | 7.15E-01 | 1 |
| SCN3B     | 681725  | 451 | 6   | 566396  | 151300  | 0 | 1  | 0 | 0 | 50 | 49  | 18920688 | 7.15E-01 | 1 |
| UBXN2A    | 240935  | 226 | 33  | 691352  | 167320  | 0 | 2  | 0 | 0 | 50 | 61  | 18110788 | 7.15E-01 | 1 |
| PPP1R12A  | 222118  | 398 | -8  | 2690648 | 719476  | 0 | 5  | 0 | 0 | 5  | 3   | 3220376  | 7.15E-01 | 1 |
| UBE2U     | 175464  | 384 | 0   | 620864  | 140620  | 0 | 1  | 0 | 0 | 50 | 52  | 24719928 | 7.16E-01 | 1 |
| RFC1      | 668832  | 299 | 43  | 3026356 | 754364  | 0 | 6  | 1 | 0 | 37 | 25  | 15124304 | 7.16E-01 | 1 |
| ASB7      | 290809  | 374 | -9  | 812748  | 228552  | 0 | 1  | 0 | 0 | 24 | 13  | 9389856  | 7.16E-01 | 1 |
| GALNT14   | 94332   | 876 | 6   | 1446072 | 385548  | 0 | 3  | 0 | 0 | 22 | 24  | 10767576 | 7.16E-01 | 1 |
| SFRP2     | 142627  | 793 | -3  | 753296  | 203632  | 0 | 4  | 2 | 0 | 6  | 9   | 2473132  | 7.16E-01 | 1 |
| DUSP26    | 91655   | 610 | 11  | 526168  | 165896  | 0 | 1  | 0 | 0 | 50 | 61  | 21651564 | 7.16E-01 | 1 |
| CAMKV     | 1298303 | 170 | 38  | 1279820 | 371308  | 0 | 4  | 0 | 0 | 23 | 34  | 10991856 | 7.16E-01 | 1 |
| SP140     | 504037  | 626 | 37  | 2446076 | 568888  | 0 | 10 | 1 | 0 | 50 | 81  | 22477128 | 7.16E-01 | 1 |
| GTPBP2    | 1221714 | 194 | 46  | 1508728 | 472412  | 0 | 6  | 2 | 0 | 50 | 87  | 24616332 | 7.16E-01 | 1 |
| RNF152    | 96352   | 799 | -12 | 495552  | 158064  | 0 | 1  | 0 | 0 | 50 | 80  | 25910748 | 7.16E-01 | 1 |
| MS4A13    | 337606  | 859 | 15  | 402280  | 109292  | 0 | 1  | 0 | 0 | 50 | 56  | 17876896 | 7.16E-01 | 1 |
| MGAT4A    | 319617  | 696 | 36  | 1508372 | 373444  | 0 | 5  | 0 | 0 | 24 | 27  | 11399832 | 7.17E-01 | 1 |
| OR2A4     | 129668  | 852 | 9   | 754364  | 241012  | 0 | 2  | 0 | 0 | 50 | 67  | 21034972 | 7.17E-01 | 1 |
| EFCAB7    | 133143  | 401 | 7   | 1664656 | 408332  | 0 | 3  | 1 | 0 | 50 | 38  | 19140696 | 7.17E-01 | 1 |
| DNM1      | 1788057 | 201 | 45  | 2250632 | 637240  | 0 | 6  | 1 | 0 | 13 | 10  | 4217888  | 7.17E-01 | 1 |
| TMEM57    | 613155  | 230 | 24  | 1733720 | 439660  | 0 | 5  | 1 | 0 | 6  | 12  | 5474924  | 7.17E-01 | 1 |
| DYDC2     | 340132  | 598 | -7  | 472056  | 111072  | 0 | 1  | 0 | 0 | 50 | 52  | 15550080 | 7.17E-01 | 1 |
| ZNF668    | 1398193 | 247 | 40  | 1575300 | 497688  | 0 | 5  | 1 | 0 | 50 | 79  | 26328336 | 7.17E-01 | 1 |
| UAP1      | 320314  | 193 | 10  | 1318980 | 340692  | 0 | 3  | 2 | 0 | 50 | 51  | 19713856 | 7.17E-01 | 1 |
| RUNDC1    | 1507064 | 201 | 26  | 1510152 | 478464  | 0 | 4  | 0 | 0 | 22 | 18  | 8144924  | 7.17E-01 | 1 |
| AIP       | 1392213 | 215 | 53  | 846568  | 235316  | 0 | 2  | 0 | 0 | 11 | 7   | 3262740  | 7.17E-01 | 1 |
| OR2H1     | 404210  | 854 | 21  | 765400  | 250268  | 0 | 2  | 2 | 0 | 12 | 14  | 5210416  | 7.17E-01 | 1 |
| ABCD3     | 459824  | 348 | -8  | 1777152 | 464580  | 0 | 5  | 1 | 0 | 22 | 21  | 8508400  | 7.17E-01 | 1 |
| ZNF445    | 366436  | 418 | 42  | 2641164 | 686724  | 0 | 6  | 3 | 0 | 49 | 45  | 21387412 | 7.17E-01 | 1 |
| RBBP5     | 655446  | 431 | 37  | 1408692 | 373800  | 0 | 3  | 0 | 0 | 34 | 34  | 14715260 | 7.17E-01 | 1 |

|         |         |      |     |         |         |   |    |   |   |    |     |          |          |   |
|---------|---------|------|-----|---------|---------|---|----|---|---|----|-----|----------|----------|---|
| RNF113B | 470049  | 470  | 20  | 814172  | 227128  | 0 | 2  | 0 | 0 | 50 | 50  | 17280596 | 7.17E-01 | 1 |
| C4orf3  | 218603  | 824  | -1  | 504452  | 148096  | 0 | 1  | 0 | 0 | 50 | 51  | 19615600 | 7.17E-01 | 1 |
| PCDHGA1 | NaN     | NaN  | NaN | 2304388 | 735140  | 0 | 8  | 5 | 0 | 26 | 45  | 12312260 | 7.18E-01 | 1 |
| TRRAP   | 1040178 | 470  | 42  | 9834144 | 2739420 | 0 | 32 | 6 | 0 | 26 | 36  | 14837724 | 7.18E-01 | 1 |
| BTAF1   | 366076  | 306  | 22  | 4802440 | 1285160 | 0 | 12 | 2 | 0 | 7  | 7   | 4248148  | 7.18E-01 | 1 |
| PDE12   | 703082  | 422  | 29  | 1506948 | 456036  | 0 | 5  | 1 | 0 | 50 | 58  | 21505604 | 7.18E-01 | 1 |
| PTGES3  | 2757565 | 164  | 43  | 456392  | 89356   | 0 | 1  | 1 | 0 | 25 | 34  | 10546856 | 7.18E-01 | 1 |
| CRP     | 737948  | 602  | -2  | 565328  | 159844  | 0 | 2  | 2 | 0 | 6  | 7   | 2167684  | 7.18E-01 | 1 |
| KLF3    | 294258  | 364  | 39  | 883948  | 245996  | 0 | 3  | 0 | 0 | 4  | 3   | 1517272  | 7.18E-01 | 1 |
| TIMP2   | 681697  | 157  | 24  | 575296  | 149876  | 0 | 1  | 1 | 0 | 50 | 50  | 21912512 | 7.18E-01 | 1 |
| PHEX    | 92340   | NaN  | 14  | 2000364 | 492348  | 0 | 6  | 1 | 0 | 17 | 37  | 10589220 | 7.18E-01 | 1 |
| CREG1   | 481959  | 506  | 15  | 545036  | 178000  | 0 | 1  | 0 | 0 | 50 | 60  | 19997588 | 7.18E-01 | 1 |
| SEH1L   | 436900  | 355  | 69  | 1102176 | 300108  | 0 | 1  | 1 | 0 | 50 | 58  | 19829556 | 7.18E-01 | 1 |
| SLC26A3 | 511053  | 515  | 19  | 1975444 | 561056  | 0 | 8  | 4 | 0 | 16 | 22  | 5595252  | 7.18E-01 | 1 |
| MFSD6L  | 423397  | 636  | 11  | 1410828 | 469920  | 0 | 5  | 3 | 0 | 50 | 71  | 20685024 | 7.18E-01 | 1 |
| EVI5    | 488549  | 506  | 4   | 2144188 | 529016  | 0 | 7  | 1 | 0 | 50 | 55  | 21434404 | 7.18E-01 | 1 |
| RINL    | 1989663 | 219  | 30  | 1123892 | 361696  | 0 | 3  | 0 | 0 | 34 | 48  | 16044920 | 7.18E-01 | 1 |
| HSPBAP1 | 424676  | 412  | 39  | 1268784 | 327876  | 0 | 4  | 2 | 0 | 41 | 61  | 18865508 | 7.18E-01 | 1 |
| WDR49   | 145736  | 911  | -20 | 1839808 | 456392  | 0 | 8  | 2 | 0 | 8  | 16  | 4877912  | 7.18E-01 | 1 |
| ADAMTS1 | 61971   | 1102 | -26 | 3155940 | 853332  | 0 | 17 | 5 | 0 | 50 | 127 | 27636280 | 7.19E-01 | 1 |
| BTN3A3  | 384310  | 375  | 47  | 1489504 | 423284  | 0 | 7  | 4 | 0 | 17 | 22  | 5974748  | 7.19E-01 | 1 |
| STX18   | 140686  | 633  | 44  | 897832  | 223568  | 0 | 2  | 0 | 0 | 34 | 32  | 11430448 | 7.19E-01 | 1 |
| LRRC31  | 404285  | 689  | 13  | 1430408 | 377716  | 0 | 10 | 0 | 0 | 1  | 2   | 705592   | 7.19E-01 | 1 |
| VGLL2   | 181822  | 589  | -25 | 790676  | 241012  | 0 | 1  | 0 | 0 | 14 | 45  | 11037424 | 7.19E-01 | 1 |
| CLASP2  | 463864  | 393  | 9   | 3899624 | 1086868 | 0 | 10 | 0 | 0 | 0  | 0   | 1086868  | 7.19E-01 | 1 |
| PFKFB2  | 434877  | 155  | 24  | 1387688 | 365968  | 0 | 3  | 1 | 0 | 22 | 32  | 10203316 | 7.19E-01 | 1 |
| GLB1L2  | 270422  | 686  | 5   | 1659672 | 458172  | 0 | 5  | 3 | 0 | 12 | 19  | 5967628  | 7.19E-01 | 1 |
| PA2G4   | 2785610 | 165  | 39  | 1054116 | 262728  | 0 | 3  | 0 | 0 | 36 | 47  | 15674324 | 7.19E-01 | 1 |
| RAX2    | 2144458 | 206  | 34  | 443220  | 158064  | 0 | 1  | 0 | 0 | 50 | 63  | 19224000 | 7.19E-01 | 1 |
| VAT1L   | 44717   | 1259 | -28 | 1084732 | 297260  | 0 | 6  | 2 | 0 | 50 | 111 | 22577876 | 7.19E-01 | 1 |
| OR4L1   | 383274  | 768  | -37 | 776436  | 226416  | 0 | 2  | 2 | 0 | 32 | 40  | 12755836 | 7.19E-01 | 1 |
| F9      | 69360   | NaN  | 0   | 1207908 | 304380  | 0 | 3  | 0 | 0 | 38 | 47  | 18112924 | 7.19E-01 | 1 |
| ATL1    | 483990  | 295  | 43  | 1470280 | 376292  | 0 | 3  | 0 | 0 | 19 | 26  | 11475660 | 7.19E-01 | 1 |

|          |         |      |     |         |         |   |    |   |   |    |     |          |          |   |
|----------|---------|------|-----|---------|---------|---|----|---|---|----|-----|----------|----------|---|
| ZNF121   | 706527  | 642  | -58 | 1011040 | 250268  | 0 | 2  | 1 | 0 | 50 | 120 | 30635224 | 7.19E-01 | 1 |
| GATSL3   | 548674  | 211  | 43  | 836244  | 255252  | 0 | 2  | 1 | 0 | 50 | 54  | 19921048 | 7.19E-01 | 1 |
| SENP3    | 1957426 | 194  | 24  | 1458176 | 427912  | 0 | 2  | 0 | 0 | 17 | 20  | 7764360  | 7.19E-01 | 1 |
| SATB1    | 67460   | 883  | -6  | 1956932 | 533644  | 0 | 5  | 1 | 0 | 50 | 56  | 23209064 | 7.19E-01 | 1 |
| G2E3     | 354135  | 695  | -10 | 1873628 | 451408  | 0 | 5  | 1 | 0 | 50 | 57  | 21194816 | 7.19E-01 | 1 |
| T        | 141864  | 323  | -23 | 1107872 | 318976  | 0 | 6  | 3 | 0 | 6  | 7   | 1578860  | 7.20E-01 | 1 |
| SMOX     | 784685  | 231  | 26  | 1483808 | 423640  | 0 | 5  | 2 | 0 | 50 | 77  | 22406996 | 7.20E-01 | 1 |
| UTY      | 0       | 0    | 0   | 3725896 | 987188  | 0 | 6  | 0 | 0 | 0  | 0   | 987188   | 7.20E-01 | 1 |
| CCDC127  | 1040169 | 530  | 24  | 666788  | 178000  | 0 | 2  | 0 | 0 | 50 | 65  | 18657604 | 7.20E-01 | 1 |
| TARDBP   | 702484  | 307  | 33  | 1065864 | 285156  | 0 | 2  | 1 | 0 | 5  | 5   | 3216460  | 7.20E-01 | 1 |
| ZNF432   | 436768  | 901  | -53 | 1691000 | 414028  | 0 | 7  | 3 | 0 | 50 | 58  | 17193732 | 7.20E-01 | 1 |
| C10orf53 | NaN     | NaN  | NaN | 463512  | 124956  | 0 | 1  | 0 | 0 | 50 | 116 | 39770540 | 7.20E-01 | 1 |
| MST1     | 1551582 | 271  | 48  | 1875408 | 527592  | 0 | 6  | 4 | 0 | 43 | 65  | 18594592 | 7.20E-01 | 1 |
| NASP     | 873800  | 161  | 27  | 2117488 | 554648  | 0 | 8  | 0 | 0 | 3  | 4   | 1792816  | 7.20E-01 | 1 |
| ZNF684   | 693560  | 457  | 26  | 999648  | 231756  | 0 | 3  | 0 | 0 | 50 | 57  | 20934580 | 7.20E-01 | 1 |
| FCRLA    | 598281  | 504  | 20  | 959064  | 289428  | 0 | 3  | 1 | 0 | 50 | 64  | 18701036 | 7.20E-01 | 1 |
| FAM102B  | 615760  | 313  | -3  | 949452  | 252048  | 0 | 3  | 0 | 0 | 50 | 78  | 24723488 | 7.20E-01 | 1 |
| TYW1B    | NaN     | NaN  | NaN | 1870424 | 458884  | 0 | 7  | 2 | 0 | 50 | 118 | 40104468 | 7.20E-01 | 1 |
| TMEM119  | 437636  | 399  | 40  | 681028  | 233180  | 0 | 1  | 1 | 0 | 7  | 13  | 3206492  | 7.20E-01 | 1 |
| SGMS1    | 295850  | 573  | 28  | 1059456 | 284088  | 0 | 3  | 1 | 0 | 50 | 70  | 23338292 | 7.21E-01 | 1 |
| IFNB1    | 144026  | 601  | 5   | 482736  | 121752  | 0 | 1  | 0 | 0 | 50 | 56  | 18608832 | 7.21E-01 | 1 |
| DOCK6    | 1691034 | 233  | 32  | 5184784 | 1579928 | 0 | 13 | 1 | 0 | 4  | 7   | 3765768  | 7.21E-01 | 1 |
| MKL2     | 185822  | 323  | 12  | 2652912 | 775368  | 0 | 6  | 0 | 0 | 11 | 6   | 4235332  | 7.21E-01 | 1 |
| GARNL3   | 673881  | 270  | 47  | 2642944 | 721256  | 0 | 8  | 3 | 0 | 50 | 58  | 23032488 | 7.21E-01 | 1 |
| MYBPC2   | 1038277 | 491  | 30  | 2970108 | 806340  | 0 | 6  | 4 | 0 | 50 | 64  | 20883672 | 7.21E-01 | 1 |
| ASPHD2   | 163136  | 553  | -46 | 922040  | 271984  | 0 | 3  | 1 | 0 | 50 | 80  | 20251060 | 7.21E-01 | 1 |
| TRPV2    | 829707  | 254  | 8   | 1934148 | 572448  | 0 | 5  | 3 | 0 | 50 | 75  | 21935652 | 7.21E-01 | 1 |
| MYH9     | 1223952 | 226  | 49  | 5111804 | 1342120 | 0 | 27 | 9 | 0 | 3  | 11  | 2314000  | 7.21E-01 | 1 |
| TBP      | 425191  | 598  | -16 | 875404  | 239588  | 0 | 2  | 0 | 0 | 50 | 46  | 17122888 | 7.21E-01 | 1 |
| USP25    | 74958   | 477  | 30  | 2795668 | 686012  | 0 | 7  | 4 | 0 | 13 | 13  | 4745480  | 7.21E-01 | 1 |
| GRIPAP1  | 834590  | NaN  | 41  | 2271280 | 590960  | 0 | 5  | 0 | 0 | 11 | 9   | 4312584  | 7.21E-01 | 1 |
| SMPDL3A  | 138284  | 1073 | -1  | 1179784 | 304736  | 0 | 3  | 1 | 0 | 50 | 41  | 15762612 | 7.21E-01 | 1 |
| EGLN1    | 362960  | 518  | 3   | 1068356 | 316840  | 0 | 3  | 0 | 0 | 37 | 51  | 17896476 | 7.21E-01 | 1 |

|          |         |     |     |         |         |   |    |   |   |    |     |          |          |   |
|----------|---------|-----|-----|---------|---------|---|----|---|---|----|-----|----------|----------|---|
| ZNF232   | 1391000 | 384 | 20  | 1137064 | 303668  | 0 | 4  | 1 | 0 | 50 | 83  | 22837756 | 7.21E-01 | 1 |
| NAP1L2   | 196410  | NaN | -3  | 1174800 | 302244  | 0 | 4  | 1 | 0 | 10 | 9   | 3260960  | 7.21E-01 | 1 |
| ADRBK1   | 1369264 | 177 | 44  | 1822720 | 473480  | 0 | 5  | 4 | 0 | 41 | 55  | 16974792 | 7.21E-01 | 1 |
| LYG1     | 386109  | 630 | 24  | 506944  | 139196  | 0 | 2  | 2 | 0 | 3  | 2   | 896052   | 7.21E-01 | 1 |
| MORN3    | 743586  | 194 | 50  | 642936  | 150588  | 0 | 2  | 0 | 0 | 50 | 60  | 16334704 | 7.21E-01 | 1 |
| PPP2R2D  | 123624  | 470 | -21 | 1104668 | 270916  | 0 | 4  | 0 | 0 | 50 | 80  | 22720632 | 7.22E-01 | 1 |
| FOXRED2  | 1191841 | 195 | 30  | 1708800 | 519048  | 0 | 4  | 2 | 0 | 7  | 7   | 3809200  | 7.22E-01 | 1 |
| KIR2DL1  | NaN     | NaN | NaN | 897120  | 253116  | 0 | 1  | 2 | 0 | 26 | 42  | 11830236 | 7.22E-01 | 1 |
| SLC5A7   | 122653  | 911 | -16 | 1459244 | 436456  | 0 | 6  | 4 | 0 | 7  | 10  | 2725892  | 7.22E-01 | 1 |
| DRG2     | 899154  | 183 | 23  | 957284  | 265576  | 0 | 3  | 0 | 0 | 50 | 50  | 14179124 | 7.22E-01 | 1 |
| ANKRD45  | 432542  | 423 | 4   | 699184  | 177644  | 0 | 1  | 0 | 0 | 50 | 39  | 18573588 | 7.22E-01 | 1 |
| CYP20A1  | 417679  | 298 | 23  | 1217520 | 317196  | 0 | 3  | 1 | 0 | 28 | 30  | 11332192 | 7.22E-01 | 1 |
| CALCRL   | 61297   | 453 | 1   | 1231404 | 300108  | 0 | 5  | 2 | 0 | 4  | 7   | 2374876  | 7.22E-01 | 1 |
| SALL1    | 332955  | 935 | -42 | 3275912 | 980068  | 0 | 16 | 5 | 0 | 50 | 65  | 15613448 | 7.22E-01 | 1 |
| TTC29    | 34493   | 970 | -9  | 1263088 | 309008  | 0 | 4  | 3 | 0 | 4  | 4   | 1536852  | 7.22E-01 | 1 |
| TM9SF4   | 1055549 | 262 | 36  | 1689576 | 443220  | 0 | 8  | 3 | 0 | 7  | 11  | 2339276  | 7.22E-01 | 1 |
| CPT1A    | 619314  | 303 | 45  | 2045576 | 553936  | 0 | 5  | 3 | 0 | 46 | 43  | 19313356 | 7.22E-01 | 1 |
| AP1G2    | 1250373 | 553 | 35  | 1987548 | 620508  | 0 | 7  | 2 | 0 | 50 | 82  | 25432996 | 7.22E-01 | 1 |
| SBF2     | 530606  | 482 | 12  | 4807780 | 1286228 | 0 | 12 | 3 | 0 | 5  | 3   | 2520836  | 7.22E-01 | 1 |
| ILDR2    | 261602  | 681 | -9  | 1626564 | 464580  | 0 | 4  | 1 | 0 | 50 | 60  | 25885472 | 7.22E-01 | 1 |
| HSPA2    | 662511  | 188 | 36  | 1574944 | 475616  | 0 | 5  | 3 | 0 | 24 | 27  | 10666472 | 7.23E-01 | 1 |
| C2orf80  | 321897  | 440 | 5   | 522252  | 133500  | 0 | 1  | 0 | 0 | 50 | 50  | 16889352 | 7.23E-01 | 1 |
| RERG     | 354506  | 469 | 3   | 512996  | 140620  | 0 | 1  | 1 | 0 | 33 | 33  | 13518388 | 7.23E-01 | 1 |
| GNMT     | 1200368 | 259 | 40  | 756856  | 215024  | 0 | 2  | 2 | 0 | 47 | 62  | 20023576 | 7.23E-01 | 1 |
| HPS4     | 163136  | 553 | -46 | 1807412 | 541120  | 0 | 6  | 3 | 0 | 7  | 12  | 3713792  | 7.23E-01 | 1 |
| SLC35F5  | 518912  | 544 | 19  | 1377008 | 365968  | 0 | 3  | 0 | 0 | 24 | 27  | 9341084  | 7.23E-01 | 1 |
| AP1S2    | 170722  | NaN | 47  | 416876  | 104308  | 0 | 1  | 1 | 0 | 50 | 65  | 20146396 | 7.23E-01 | 1 |
| TANC2    | 778921  | 453 | -27 | 5005716 | 1478112 | 0 | 16 | 4 | 0 | 50 | 64  | 20635184 | 7.23E-01 | 1 |
| KIAA1161 | 478815  | 302 | 38  | 1730160 | 564972  | 0 | 4  | 2 | 0 | 50 | 40  | 17367460 | 7.23E-01 | 1 |
| GRID1    | 89265   | 965 | -18 | 2571388 | 730868  | 0 | 11 | 4 | 0 | 50 | 74  | 21986204 | 7.23E-01 | 1 |
| CRK      | 1380844 | 220 | 18  | 766468  | 219296  | 0 | 3  | 1 | 0 | 50 | 73  | 21304464 | 7.23E-01 | 1 |
| SSX4     | NaN     | NaN | NaN | 1130656 | 206480  | 0 | 1  | 0 | 0 | 50 | 116 | 39852064 | 7.23E-01 | 1 |
| BTC      | 110870  | 606 | 3   | 466360  | 127448  | 0 | 1  | 0 | 0 | 50 | 61  | 22065592 | 7.23E-01 | 1 |

|          |         |      |     |         |         |   |    |   |   |    |    |          |          |   |
|----------|---------|------|-----|---------|---------|---|----|---|---|----|----|----------|----------|---|
| KCNH3    | 2227486 | 224  | 53  | 2654336 | 878608  | 0 | 9  | 5 | 0 | 50 | 79 | 22778304 | 7.23E-01 | 1 |
| BTK      | 374364  | NaN  | 37  | 1757928 | 433608  | 0 | 5  | 0 | 0 | 25 | 27 | 11161312 | 7.24E-01 | 1 |
| SEL1L    | 192523  | 330  | -11 | 2090076 | 542544  | 0 | 9  | 0 | 0 | 2  | 1  | 1065152  | 7.24E-01 | 1 |
| C10orf2  | 1020226 | 247  | 40  | 1701324 | 528660  | 0 | 5  | 1 | 0 | 50 | 62 | 20159924 | 7.24E-01 | 1 |
| MTMR11   | 1115711 | 451  | 51  | 1849064 | 533644  | 0 | 5  | 3 | 0 | 50 | 61 | 22950252 | 7.24E-01 | 1 |
| PCDH18   | 87218   | 686  | -17 | 2844796 | 807764  | 0 | 8  | 1 | 0 | 6  | 9  | 4607708  | 7.24E-01 | 1 |
| CHI3L1   | 507603  | 453  | 31  | 995020  | 273764  | 0 | 2  | 0 | 0 | 28 | 30 | 12709912 | 7.24E-01 | 1 |
| COLEC11  | 253814  | 371  | 14  | 801000  | 184764  | 0 | 2  | 1 | 0 | 50 | 69 | 23313728 | 7.24E-01 | 1 |
| DNAJB1   | 1008795 | 204  | 26  | 858672  | 244572  | 0 | 3  | 1 | 0 | 50 | 74 | 20546896 | 7.24E-01 | 1 |
| ZSCAN18  | 1248040 | 619  | -53 | 1405132 | 439304  | 0 | 4  | 0 | 0 | 5  | 4  | 2453552  | 7.24E-01 | 1 |
| GADD45A  | 446714  | 228  | -7  | 425420  | 119260  | 0 | 1  | 1 | 0 | 25 | 34 | 11032084 | 7.24E-01 | 1 |
| CYP2E1   | 563924  | 525  | -10 | 1272700 | 346388  | 0 | 4  | 2 | 0 | 50 | 61 | 17772588 | 7.25E-01 | 1 |
| GRID2    | 4518    | 1143 | -17 | 2571744 | 720900  | 0 | 9  | 5 | 0 | 17 | 22 | 6256700  | 7.25E-01 | 1 |
| DDIT3    | 1347795 | 303  | 44  | 429692  | 123532  | 0 | 1  | 0 | 0 | 50 | 94 | 29615284 | 7.25E-01 | 1 |
| ATP5O    | 948739  | 419  | 44  | 553224  | 162336  | 0 | 1  | 0 | 0 | 50 | 67 | 21864452 | 7.25E-01 | 1 |
| OSBPL10  | 373732  | 604  | 7   | 1939488 | 558564  | 0 | 4  | 3 | 0 | 50 | 78 | 21206564 | 7.25E-01 | 1 |
| GDAP1L1  | 664405  | 367  | 19  | 936636  | 265932  | 0 | 2  | 0 | 0 | 50 | 60 | 23006500 | 7.25E-01 | 1 |
| RAET1G   | 423805  | 245  | 34  | 849772  | 244928  | 0 | 2  | 0 | 0 | 50 | 59 | 20035324 | 7.25E-01 | 1 |
| HNRNPF   | 368953  | 270  | 7   | 1046640 | 290496  | 0 | 2  | 1 | 0 | 39 | 45 | 19219016 | 7.25E-01 | 1 |
| OXR1     | 124540  | 888  | -2  | 2358144 | 630120  | 0 | 6  | 3 | 0 | 26 | 24 | 9158812  | 7.25E-01 | 1 |
| LHB      | 2070141 | 200  | 35  | 352084  | 115700  | 0 | 1  | 0 | 0 | 50 | 68 | 18142828 | 7.25E-01 | 1 |
| RBMS1    | 191666  | 366  | 5   | 1080816 | 278748  | 0 | 2  | 0 | 0 | 47 | 39 | 18272768 | 7.25E-01 | 1 |
| C19orf12 | 223109  | 552  | -46 | 381988  | 116768  | 0 | 2  | 2 | 0 | 4  | 7  | 1407624  | 7.25E-01 | 1 |
| EML4     | 251363  | 292  | 17  | 2559640 | 680672  | 0 | 5  | 2 | 0 | 29 | 22 | 10440056 | 7.25E-01 | 1 |
| CALML3   | 769552  | 446  | 17  | 375224  | 105376  | 0 | 1  | 1 | 0 | 15 | 16 | 4289444  | 7.25E-01 | 1 |
| ZNF226   | 554986  | 634  | -28 | 2138492 | 514420  | 0 | 6  | 2 | 0 | 50 | 52 | 17611320 | 7.25E-01 | 1 |
| MADD     | 1231960 | 198  | 41  | 4251708 | 1178004 | 0 | 10 | 2 | 0 | 4  | 6  | 4285528  | 7.25E-01 | 1 |
| CRIM1    | 267484  | 414  | -1  | 2677832 | 715204  | 0 | 7  | 0 | 0 | 10 | 9  | 4743700  | 7.25E-01 | 1 |
| TPM2     | 1202125 | 248  | 37  | 906020  | 219652  | 0 | 2  | 1 | 0 | 50 | 57 | 20786840 | 7.25E-01 | 1 |
| PAOX     | 435826  | 472  | 10  | 1391960 | 364900  | 0 | 3  | 2 | 0 | 50 | 50 | 20101896 | 7.25E-01 | 1 |
| ZNF566   | 645107  | 833  | -56 | 1113212 | 249556  | 0 | 4  | 1 | 0 | 50 | 67 | 17388464 | 7.25E-01 | 1 |
| CD70     | 836909  | 212  | 21  | 470988  | 159132  | 0 | 1  | 0 | 0 | 50 | 46 | 16886860 | 7.26E-01 | 1 |
| ZNF341   | 718430  | 161  | 58  | 2149884 | 629052  | 0 | 8  | 5 | 0 | 21 | 33 | 7584936  | 7.26E-01 | 1 |

|          |         |      |     |         |         |   |    |   |   |    |     |          |          |   |
|----------|---------|------|-----|---------|---------|---|----|---|---|----|-----|----------|----------|---|
| ERMN     | 78933   | 837  | 8   | 786404  | 181204  | 0 | 2  | 1 | 0 | 50 | 73  | 23743776 | 7.26E-01 | 1 |
| NPR3     | 477035  | 487  | -15 | 1363836 | 399432  | 0 | 5  | 1 | 0 | 5  | 9   | 2415460  | 7.26E-01 | 1 |
| WFIKKN2  | 1152451 | 161  | 15  | 1430052 | 422928  | 0 | 5  | 2 | 0 | 34 | 34  | 10998264 | 7.26E-01 | 1 |
| Clorf177 | 521961  | 249  | 25  | 1143116 | 311500  | 0 | 1  | 1 | 0 | 12 | 7   | 3277336  | 7.26E-01 | 1 |
| TXLNG    | 289514  | NaN  | 39  | 1386620 | 348880  | 0 | 4  | 1 | 0 | 50 | 82  | 21778656 | 7.26E-01 | 1 |
| HDC      | 308338  | 282  | 4   | 1691000 | 480244  | 0 | 3  | 2 | 0 | 50 | 49  | 25082692 | 7.26E-01 | 1 |
| SCARF2   | 606391  | 351  | 4   | 2142408 | 690996  | 0 | 4  | 1 | 0 | 28 | 35  | 13311552 | 7.26E-01 | 1 |
| FAM170A  | 296413  | 644  | -2  | 850128  | 224280  | 0 | 2  | 1 | 0 | 50 | 52  | 17495976 | 7.26E-01 | 1 |
| NAA16    | 302803  | 283  | 51  | 2356720 | 531152  | 0 | 4  | 1 | 0 | 50 | 44  | 19326172 | 7.26E-01 | 1 |
| NINJ1    | 504920  | 448  | 61  | 389820  | 115344  | 0 | 1  | 0 | 0 | 50 | 67  | 19457180 | 7.27E-01 | 1 |
| SNX2     | 144132  | 532  | 31  | 1382348 | 345676  | 0 | 3  | 0 | 0 | 50 | 62  | 25955960 | 7.27E-01 | 1 |
| EXD1     | 933164  | 175  | 39  | 1328948 | 359560  | 0 | 5  | 0 | 0 | 16 | 20  | 6877208  | 7.27E-01 | 1 |
| MANBA    | 379516  | 303  | 32  | 2299404 | 590604  | 0 | 3  | 1 | 0 | 31 | 24  | 11928848 | 7.27E-01 | 1 |
| OR5T3    | 10317   | 969  | -43 | 845856  | 245640  | 0 | 4  | 2 | 0 | 8  | 13  | 3063024  | 7.27E-01 | 1 |
| ASPHD1   | NaN     | NaN  | NaN | 935568  | 325740  | 0 | 3  | 3 | 0 | 26 | 43  | 11902860 | 7.27E-01 | 1 |
| CDRT4    | 405431  | 452  | -68 | 389820  | 105732  | 0 | 1  | 0 | 0 | 50 | 113 | 28837424 | 7.27E-01 | 1 |
| SRD5A1   | 253440  | 585  | -1  | 662872  | 187256  | 0 | 1  | 1 | 0 | 50 | 46  | 17146028 | 7.27E-01 | 1 |
| AIFM3    | 577297  | 192  | 58  | 1590608 | 451408  | 0 | 3  | 1 | 0 | 26 | 48  | 11427244 | 7.27E-01 | 1 |
| PPP1R16A | 1755818 | 291  | 7   | 1319692 | 413672  | 0 | 3  | 0 | 0 | 13 | 17  | 7333956  | 7.27E-01 | 1 |
| IM6-TRIM | 128694  | 895  | 9   | 2156292 | 571380  | 0 | 4  | 0 | 0 | 2  | 1   | 1225352  | 7.27E-01 | 1 |
| ZNF518A  | 686240  | 857  | 37  | 3755800 | 995732  | 0 | 6  | 2 | 0 | 7  | 6   | 5350324  | 7.27E-01 | 1 |
| ZRSR2    | 170722  | NaN  | 47  | 1294772 | 299752  | 0 | 2  | 2 | 0 | 50 | 65  | 20146396 | 7.27E-01 | 1 |
| TSHZ2    | 102643  | 626  | -18 | 2611260 | 713424  | 0 | 8  | 4 | 0 | 12 | 13  | 5118568  | 7.28E-01 | 1 |
| IL17RE   | 950574  | 170  | 54  | 1679252 | 529372  | 0 | 2  | 2 | 0 | 39 | 56  | 16713132 | 7.28E-01 | 1 |
| SEC14L5  | 635794  | 302  | 9   | 1781780 | 515488  | 0 | 5  | 1 | 0 | 50 | 65  | 26718156 | 7.28E-01 | 1 |
| ZNF839   | 1615110 | 214  | 35  | 2273772 | 731580  | 0 | 8  | 0 | 0 | 0  | 0   | 731580   | 7.28E-01 | 1 |
| NAT1     | 370301  | 569  | -10 | 903528  | 240300  | 0 | 2  | 0 | 0 | 50 | 39  | 15102944 | 7.28E-01 | 1 |
| RAB23    | 314024  | 348  | 23  | 633324  | 154860  | 0 | 1  | 0 | 0 | 50 | 46  | 22560076 | 7.28E-01 | 1 |
| RPRD2    | 1460825 | 163  | 36  | 3609128 | 1117840 | 0 | 11 | 3 | 0 | 34 | 75  | 22729532 | 7.28E-01 | 1 |
| STX19    | 85529   | 1378 | -18 | 766468  | 185120  | 0 | 2  | 1 | 0 | 42 | 52  | 15985468 | 7.28E-01 | 1 |
| SCN2A    | 119701  | 879  | -9  | 5265596 | 1375228 | 0 | 18 | 6 | 0 | 9  | 16  | 5446800  | 7.28E-01 | 1 |
| SORD     | 724004  | 565  | 19  | 910648  | 270560  | 0 | 2  | 0 | 0 | 4  | 3   | 1975088  | 7.28E-01 | 1 |
| CIB2     | 414873  | 271  | 56  | 501604  | 122108  | 0 | 1  | 0 | 0 | 50 | 44  | 17114700 | 7.28E-01 | 1 |



|         |         |      |     |         |         |   |    |   |   |    |    |          |          |   |
|---------|---------|------|-----|---------|---------|---|----|---|---|----|----|----------|----------|---|
| KLHL24  | 1124894 | 463  | 32  | 1533292 | 417944  | 0 | 5  | 3 | 0 | 40 | 53 | 16060228 | 7.28E-01 | 1 |
| PEBP4   | 718204  | 366  | 44  | 604488  | 151656  | 0 | 1  | 0 | 0 | 50 | 59 | 26221892 | 7.28E-01 | 1 |
| SH3KBP1 | 340334  | NaN  | 58  | 1788188 | 489856  | 0 | 6  | 2 | 0 | 5  | 5  | 1975444  | 7.28E-01 | 1 |
| YWHAE   | 1417492 | 215  | 22  | 671060  | 170524  | 0 | 2  | 0 | 0 | 50 | 67 | 19106876 | 7.28E-01 | 1 |
| DNTTIP2 | 558028  | 275  | 9   | 1952660 | 502672  | 0 | 4  | 2 | 0 | 50 | 71 | 25235060 | 7.28E-01 | 1 |
| PLEKHG2 | 1410725 | 230  | 39  | 3392324 | 1128520 | 0 | 9  | 1 | 0 | 1  | 1  | 1641516  | 7.29E-01 | 1 |
| THOP1   | 1320743 | 291  | 26  | 1771100 | 490924  | 0 | 5  | 1 | 0 | 50 | 53 | 22696780 | 7.29E-01 | 1 |
| ACOT12  | 114956  | 831  | 16  | 1453904 | 389464  | 0 | 5  | 3 | 0 | 8  | 7  | 2938068  | 7.29E-01 | 1 |
| CST5    | 159399  | 889  | -45 | 372376  | 96476   | 0 | 1  | 0 | 0 | 50 | 66 | 16827052 | 7.29E-01 | 1 |
| SNRPC   | 995432  | 242  | 24  | 427556  | 106444  | 0 | 1  | 0 | 0 | 50 | 58 | 18985480 | 7.29E-01 | 1 |
| SKA2    | 843250  | 507  | 9   | 449984  | 92560   | 0 | 1  | 0 | 0 | 50 | 55 | 18982276 | 7.29E-01 | 1 |
| BCDIN3D | 1291800 | 231  | 45  | 731224  | 213956  | 0 | 2  | 1 | 0 | 50 | 88 | 26715664 | 7.29E-01 | 1 |
| PSMC3   | 1022438 | 245  | 47  | 1145964 | 312924  | 0 | 3  | 0 | 0 | 50 | 66 | 23883684 | 7.29E-01 | 1 |
| SAFB    | 879991  | 295  | 21  | 2388760 | 633680  | 0 | 10 | 0 | 0 | 1  | 0  | 719832   | 7.29E-01 | 1 |
| CCDC18  | 657064  | 412  | 9   | 3776804 | 881812  | 0 | 7  | 1 | 0 | 13 | 9  | 5729464  | 7.29E-01 | 1 |
| RNF183  | 426351  | 312  | 26  | 472412  | 150232  | 0 | 1  | 0 | 0 | 50 | 53 | 18446852 | 7.29E-01 | 1 |
| TAS2R4  | 200522  | 844  | 14  | 735496  | 225704  | 0 | 2  | 0 | 0 | 50 | 60 | 17687504 | 7.29E-01 | 1 |
| HEATR4  | 602175  | 149  | 42  | 2503392 | 700608  | 0 | 7  | 3 | 0 | 50 | 49 | 19416240 | 7.29E-01 | 1 |
| RSBN1L  | 262077  | 795  | 25  | 2154156 | 591672  | 0 | 4  | 3 | 0 | 32 | 32 | 12246756 | 7.29E-01 | 1 |
| ZNF568  | 265140  | 1008 | -41 | 1690288 | 393380  | 0 | 6  | 2 | 0 | 50 | 86 | 20457540 | 7.29E-01 | 1 |
| ZNF705A | 172474  | 438  | 26  | 793168  | 190460  | 0 | 2  | 0 | 0 | 13 | 15 | 4762924  | 7.29E-01 | 1 |
| CRIL    | 386490  | 361  | 13  | 1477756 | 397652  | 0 | 4  | 1 | 0 | 5  | 7  | 3327888  | 7.29E-01 | 1 |
| INSM2   | 313860  | 434  | 11  | 1336068 | 480600  | 0 | 3  | 0 | 0 | 44 | 49 | 19533720 | 7.29E-01 | 1 |
| VMO1    | 1272092 | 222  | 28  | 537204  | 164472  | 0 | 1  | 1 | 0 | 14 | 13 | 5818820  | 7.29E-01 | 1 |
| MACROD2 | 37709   | 920  | -12 | 1239236 | 271984  | 0 | 4  | 1 | 0 | 50 | 78 | 25344708 | 7.30E-01 | 1 |
| SPTBN4  | 915378  | 177  | 37  | 6445024 | 2021012 | 0 | 18 | 7 | 0 | 13 | 19 | 7876500  | 7.30E-01 | 1 |
| LEMD3   | 299752  | 577  | 7   | 2300116 | 675332  | 0 | 6  | 1 | 0 | 31 | 37 | 12774348 | 7.30E-01 | 1 |
| GJB7    | 222729  | 596  | 22  | 571380  | 150588  | 0 | 1  | 1 | 0 | 36 | 33 | 14766168 | 7.30E-01 | 1 |
| GJA10   | 383829  | 567  | 24  | 1365260 | 375580  | 0 | 3  | 0 | 0 | 50 | 66 | 27209080 | 7.30E-01 | 1 |
| SAMD11  | 1851188 | 467  | 3   | 1676760 | 566040  | 0 | 4  | 0 | 0 | 4  | 6  | 3383780  | 7.30E-01 | 1 |
| WSCD1   | 283312  | 593  | -11 | 1437528 | 437880  | 0 | 5  | 0 | 0 | 3  | 1  | 1044860  | 7.30E-01 | 1 |
| THAP4   | 1213423 | 426  | 21  | 1449632 | 432184  | 0 | 3  | 1 | 0 | 50 | 69 | 19805704 | 7.30E-01 | 1 |
| ARFGAP1 | 1278630 | 332  | 62  | 1113568 | 278036  | 0 | 4  | 1 | 0 | 50 | 61 | 17105444 | 7.30E-01 | 1 |

|          |         |     |     |         |         |   |    |   |   |    |     |          |          |   |
|----------|---------|-----|-----|---------|---------|---|----|---|---|----|-----|----------|----------|---|
| IRS4     | 110759  | NaN | 29  | 3054480 | 980424  | 0 | 9  | 4 | 0 | 8  | 17  | 5419032  | 7.30E-01 | 1 |
| EIF2AK1  | NaN     | NaN | NaN | 1639736 | 441796  | 0 | 5  | 1 | 0 | 50 | 117 | 40087380 | 7.30E-01 | 1 |
| RPL13    | 1094600 | 211 | 38  | 536492  | 164116  | 0 | 1  | 0 | 0 | 50 | 48  | 16202984 | 7.30E-01 | 1 |
| RABAC1   | 1150724 | 438 | 33  | 469920  | 145248  | 0 | 1  | 0 | 0 | 50 | 64  | 21926752 | 7.30E-01 | 1 |
| CUL3     | 255624  | 463 | 20  | 2021368 | 506588  | 0 | 5  | 0 | 0 | 5  | 2   | 2096840  | 7.30E-01 | 1 |
| TBC1D19  | 116288  | 735 | 17  | 1417236 | 356712  | 0 | 4  | 0 | 0 | 29 | 25  | 11829524 | 7.30E-01 | 1 |
| C10orf76 | 932053  | 319 | 42  | 1853692 | 463868  | 0 | 2  | 2 | 0 | 50 | 67  | 21448644 | 7.30E-01 | 1 |
| REST     | 590352  | 569 | 37  | 2788904 | 744040  | 0 | 5  | 1 | 0 | 15 | 22  | 8393768  | 7.31E-01 | 1 |
| NME7     | 270055  | 491 | 12  | 1001072 | 255964  | 0 | 2  | 0 | 0 | 50 | 54  | 20457184 | 7.31E-01 | 1 |
| C2orf68  | 1158965 | 170 | 43  | 430048  | 119972  | 0 | 1  | 1 | 0 | 36 | 48  | 15827404 | 7.31E-01 | 1 |
| OPTN     | 244367  | 372 | 16  | 1532936 | 378784  | 0 | 7  | 4 | 0 | 7  | 8   | 2219304  | 7.31E-01 | 1 |
| MFAP2    | 678965  | 221 | 52  | 503028  | 120684  | 0 | 1  | 0 | 0 | 50 | 57  | 20959500 | 7.31E-01 | 1 |
| ABCA9    | 263023  | 602 | -42 | 4250284 | 1118552 | 0 | 14 | 1 | 0 | 1  | 2   | 1352800  | 7.31E-01 | 1 |
| MCM10    | 246179  | 354 | 35  | 2276976 | 610896  | 0 | 8  | 3 | 0 | 10 | 9   | 3885740  | 7.31E-01 | 1 |
| KRTAP9-9 | 1149433 | 468 | -14 | 433608  | 113208  | 0 | 1  | 0 | 0 | 50 | 53  | 16834528 | 7.31E-01 | 1 |
| KRT34    | 1321356 | 424 | -6  | 1115348 | 312568  | 0 | 3  | 1 | 0 | 50 | 49  | 16872976 | 7.31E-01 | 1 |
| MEX3B    | 229948  | 844 | -8  | 1364548 | 466004  | 0 | 2  | 2 | 0 | 50 | 70  | 22189480 | 7.31E-01 | 1 |
| FOLR3    | 715293  | 267 | 62  | 646852  | 158420  | 0 | 1  | 0 | 0 | 50 | 46  | 18093700 | 7.31E-01 | 1 |
| TUBB     | 2115149 | 171 | 41  | 1125316 | 313280  | 0 | 3  | 1 | 0 | 50 | 71  | 23126828 | 7.31E-01 | 1 |
| CCDC15   | 409881  | 760 | 21  | 2493780 | 620508  | 0 | 5  | 0 | 0 | 18 | 14  | 8707048  | 7.31E-01 | 1 |
| SEC23IP  | 450354  | 404 | 39  | 2584916 | 701320  | 0 | 11 | 1 | 0 | 12 | 17  | 6055204  | 7.32E-01 | 1 |
| UCP2     | 533576  | 196 | 41  | 775012  | 243860  | 0 | 2  | 1 | 0 | 50 | 52  | 16080164 | 7.32E-01 | 1 |
| SUSD5    | 496534  | 256 | 21  | 1559992 | 475616  | 0 | 4  | 1 | 0 | 50 | 47  | 18103668 | 7.32E-01 | 1 |
| ZFP36    | 1579611 | 230 | 36  | 768604  | 285512  | 0 | 2  | 1 | 0 | 50 | 51  | 17214024 | 7.32E-01 | 1 |
| HMBOX1   | 382811  | 465 | 40  | 1103244 | 284088  | 0 | 4  | 1 | 0 | 50 | 76  | 23547264 | 7.32E-01 | 1 |
| SNIP1    | 445473  | 274 | 30  | 996444  | 290496  | 0 | 2  | 0 | 0 | 50 | 61  | 20995456 | 7.32E-01 | 1 |
| ATP5B    | 2757565 | 164 | 43  | 1322540 | 414028  | 0 | 3  | 1 | 0 | 32 | 38  | 15422276 | 7.32E-01 | 1 |
| SOCS7    | 1035666 | 181 | 22  | 1439308 | 463868  | 0 | 3  | 1 | 0 | 26 | 33  | 10159172 | 7.32E-01 | 1 |
| ANKRD40  | 1585602 | 196 | 18  | 926668  | 272696  | 0 | 4  | 1 | 0 | 50 | 100 | 24286320 | 7.32E-01 | 1 |
| NFATC2IP | 1189140 | 257 | 55  | 1034892 | 342828  | 0 | 3  | 1 | 0 | 50 | 73  | 21972320 | 7.32E-01 | 1 |
| RNF165   | 452638  | 289 | 33  | 889288  | 254540  | 0 | 2  | 0 | 0 | 50 | 50  | 18341476 | 7.32E-01 | 1 |
| TUBA1C   | 2154742 | 171 | 49  | 1131012 | 326808  | 0 | 2  | 0 | 0 | 8  | 8   | 2941984  | 7.32E-01 | 1 |
| FCGR2C   | 693228  | 503 | 23  | 835532  | 230332  | 0 | 3  | 1 | 0 | 50 | 68  | 21398092 | 7.32E-01 | 1 |

|          |         |     |     |         |         |   |    |   |   |    |    |          |          |   |
|----------|---------|-----|-----|---------|---------|---|----|---|---|----|----|----------|----------|---|
| FNFAIP8L | 1562281 | 184 | 33  | 452120  | 144892  | 0 | 1  | 1 | 0 | 50 | 64 | 20964128 | 7.33E-01 | 1 |
| PNLIPRP1 | 128161  | 704 | -16 | 1231760 | 318976  | 0 | 8  | 4 | 0 | 7  | 15 | 2983992  | 7.33E-01 | 1 |
| LPAR3    | 340292  | 614 | -7  | 887508  | 255252  | 0 | 3  | 3 | 0 | 24 | 23 | 6614124  | 7.33E-01 | 1 |
| MAGEA1   | 607570  | NaN | 18  | 762908  | 234604  | 0 | 1  | 1 | 0 | 50 | 39 | 20146752 | 7.33E-01 | 1 |
| SMPDL3B  | 891090  | 272 | 20  | 1256680 | 357068  | 0 | 5  | 2 | 0 | 32 | 41 | 12160248 | 7.33E-01 | 1 |
| FSCN3    | 411207  | 619 | -7  | 1261664 | 360628  | 0 | 3  | 2 | 0 | 50 | 41 | 15048476 | 7.33E-01 | 1 |
| MRPL13   | 223063  | 877 | -16 | 479176  | 119972  | 0 | 1  | 0 | 0 | 50 | 70 | 24196252 | 7.33E-01 | 1 |
| CPNE8    | 87865   | 674 | -4  | 1509796 | 383768  | 0 | 5  | 2 | 0 | 50 | 67 | 21411976 | 7.33E-01 | 1 |
| SH3BP2   | 643291  | 228 | 43  | 1625852 | 498400  | 0 | 2  | 2 | 0 | 50 | 58 | 21966268 | 7.33E-01 | 1 |
| C1orf74  | 220312  | 429 | 18  | 655040  | 214312  | 0 | 1  | 0 | 0 | 50 | 55 | 21775452 | 7.33E-01 | 1 |
| ZMAT2    | 774470  | 356 | 31  | 547528  | 116768  | 0 | 1  | 0 | 0 | 50 | 59 | 20786128 | 7.34E-01 | 1 |
| SBK2     | 1094560 | 399 | 4   | 835888  | 289784  | 0 | 2  | 0 | 0 | 27 | 25 | 7431500  | 7.34E-01 | 1 |
| DPP7     | 1722012 | 202 | 36  | 1254544 | 378428  | 0 | 3  | 0 | 0 | 3  | 3  | 2037744  | 7.34E-01 | 1 |
| ACBD3    | 756400  | 214 | 24  | 1357428 | 369528  | 0 | 4  | 0 | 0 | 23 | 34 | 13760112 | 7.34E-01 | 1 |
| OR51E1   | 212267  | 935 | -3  | 774300  | 252048  | 0 | 2  | 1 | 0 | 50 | 68 | 21342556 | 7.34E-01 | 1 |
| USP13    | 361278  | 589 | 12  | 2270924 | 584908  | 0 | 6  | 3 | 0 | 50 | 66 | 18819584 | 7.34E-01 | 1 |
| POGK     | 258555  | 773 | -7  | 1552516 | 423284  | 0 | 4  | 2 | 0 | 12 | 17 | 7100776  | 7.34E-01 | 1 |
| SH3BP5L  | 411701  | 567 | -4  | 977576  | 306160  | 0 | 3  | 0 | 0 | 2  | 1  | 1058388  | 7.34E-01 | 1 |
| STARD7   | 850399  | 251 | 48  | 959064  | 259524  | 0 | 2  | 2 | 0 | 14 | 26 | 9280208  | 7.34E-01 | 1 |
| ATAD1    | 335357  | 169 | 45  | 952300  | 245996  | 0 | 2  | 0 | 0 | 50 | 49 | 18258528 | 7.35E-01 | 1 |
| GGCT     | 624959  | 400 | 36  | 493060  | 125312  | 0 | 1  | 1 | 0 | 13 | 15 | 4297276  | 7.35E-01 | 1 |
| ATP6V1E2 | 587710  | 213 | 36  | 572092  | 158420  | 0 | 1  | 0 | 0 | 50 | 49 | 20644440 | 7.35E-01 | 1 |
| OR2D2    | 403341  | 827 | 6   | 744396  | 244572  | 0 | 2  | 0 | 0 | 50 | 71 | 21769756 | 7.35E-01 | 1 |
| CST4     | 189028  | 819 | -21 | 364544  | 101104  | 0 | 1  | 1 | 0 | 7  | 7  | 2401932  | 7.35E-01 | 1 |
| TNIK     | 146464  | 805 | 25  | 3555372 | 941976  | 0 | 9  | 3 | 0 | 50 | 39 | 17190884 | 7.35E-01 | 1 |
| C12orf10 | 1689542 | 166 | 53  | 949808  | 288004  | 0 | 3  | 0 | 0 | 19 | 22 | 7674648  | 7.35E-01 | 1 |
| INRNPU1  | 2425755 | 248 | 51  | 1926672 | 525456  | 0 | 8  | 1 | 0 | 3  | 1  | 1126740  | 7.35E-01 | 1 |
| FOXA3    | 883734  | 203 | 39  | 845500  | 283376  | 0 | 2  | 3 | 0 | 12 | 25 | 5236404  | 7.35E-01 | 1 |
| SUCNR1   | 200470  | 526 | 2   | 843008  | 238876  | 0 | 2  | 2 | 0 | 9  | 6  | 2714856  | 7.35E-01 | 1 |
| KIF14    | 361992  | 370 | 7   | 4316500 | 1086512 | 0 | 12 | 3 | 0 | 50 | 51 | 19244648 | 7.35E-01 | 1 |
| TMEM99   | 836683  | 269 | -10 | 632256  | 197580  | 0 | 2  | 1 | 0 | 50 | 63 | 16537268 | 7.35E-01 | 1 |
| NLRC4    | 394223  | 276 | 21  | 2619804 | 697404  | 0 | 11 | 5 | 0 | 30 | 40 | 15258516 | 7.35E-01 | 1 |
| PPM1J    | 559669  | 325 | 27  | 1253120 | 408688  | 0 | 3  | 1 | 0 | 50 | 65 | 23160292 | 7.35E-01 | 1 |

|          |         |      |     |         |         |   |    |   |   |    |     |          |          |   |
|----------|---------|------|-----|---------|---------|---|----|---|---|----|-----|----------|----------|---|
| FUT1     | 1635420 | 190  | 44  | 890712  | 286224  | 0 | 2  | 2 | 0 | 22 | 26  | 9150980  | 7.35E-01 | 1 |
| TOP1MT   | 1770114 | 220  | 27  | 1566044 | 422572  | 0 | 5  | 1 | 0 | 37 | 70  | 17757636 | 7.36E-01 | 1 |
| FGF21    | 1635420 | 190  | 44  | 508368  | 173016  | 0 | 1  | 1 | 0 | 50 | 73  | 21072352 | 7.36E-01 | 1 |
| SLC25A43 | 655775  | NaN  | 34  | 845144  | 267712  | 0 | 1  | 0 | 0 | 15 | 14  | 7762580  | 7.36E-01 | 1 |
| CHGB     | 310620  | 346  | 13  | 1761132 | 428268  | 0 | 11 | 3 | 0 | 9  | 14  | 3442876  | 7.36E-01 | 1 |
| ZNF217   | 142853  | 451  | -30 | 2646504 | 731580  | 0 | 10 | 5 | 0 | 18 | 40  | 11130696 | 7.36E-01 | 1 |
| ESRP2    | 910198  | 281  | 30  | 1775728 | 584552  | 0 | 6  | 1 | 0 | 6  | 12  | 2828064  | 7.36E-01 | 1 |
| KIF17    | 632832  | 208  | 35  | 2594172 | 765756  | 0 | 9  | 2 | 0 | 50 | 62  | 22215824 | 7.36E-01 | 1 |
| BRF1     | 899979  | 260  | 32  | 1751876 | 493060  | 0 | 7  | 1 | 0 | 8  | 8   | 2676408  | 7.36E-01 | 1 |
| FUNDC2   | NaN     | NaN  | NaN | 485228  | 140620  | 0 | 1  | 0 | 0 | 50 | 116 | 39786204 | 7.36E-01 | 1 |
| LYPLAL1  | 82669   | 735  | -6  | 622644  | 159132  | 0 | 1  | 0 | 0 | 50 | 60  | 26851300 | 7.36E-01 | 1 |
| ARHGEF1  | 601834  | 218  | 54  | 5050572 | 1650060 | 0 | 12 | 3 | 0 | 8  | 11  | 5649364  | 7.36E-01 | 1 |
| CDNF     | 256031  | 306  | 32  | 487364  | 129940  | 0 | 1  | 0 | 0 | 50 | 56  | 19659388 | 7.36E-01 | 1 |
| TLE1     | 36728   | 629  | -33 | 1992532 | 558920  | 0 | 8  | 3 | 0 | 25 | 42  | 8468884  | 7.36E-01 | 1 |
| EMCN     | 231787  | 807  | -5  | 695980  | 190460  | 0 | 1  | 1 | 0 | 50 | 40  | 19193028 | 7.36E-01 | 1 |
| ITIH4    | 1193949 | 272  | 49  | 2399796 | 683520  | 0 | 7  | 1 | 0 | 11 | 9   | 4817392  | 7.37E-01 | 1 |
| SLC38A3  | 846254  | 199  | 44  | 1310436 | 371664  | 0 | 3  | 2 | 0 | 39 | 49  | 14244272 | 7.37E-01 | 1 |
| RC3H2    | 407115  | 430  | 26  | 3110016 | 875760  | 0 | 6  | 0 | 0 | 1  | 0   | 1161984  | 7.37E-01 | 1 |
| CACNA1A  | 1604988 | 497  | 12  | 6494152 | 1856540 | 0 | 23 | 9 | 0 | 43 | 55  | 19818520 | 7.37E-01 | 1 |
| ZFPM2    | 46151   | 998  | -25 | 2935932 | 787116  | 0 | 11 | 1 | 0 | 22 | 44  | 10612004 | 7.37E-01 | 1 |
| VCX3B    | 28829   | NaN  | -28 | 559276  | 144536  | 0 | 2  | 0 | 0 | 50 | 122 | 25026088 | 7.37E-01 | 1 |
| TEX101   | 357202  | 182  | -39 | 678892  | 201140  | 0 | 1  | 2 | 0 | 19 | 46  | 9630512  | 7.37E-01 | 1 |
| CRTAP2   | 6302    | 1011 | -69 | 516912  | 159132  | 0 | 2  | 1 | 0 | 50 | 66  | 13353560 | 7.37E-01 | 1 |
| UBP1     | 483698  | 352  | 9   | 1436104 | 365612  | 0 | 4  | 1 | 0 | 50 | 73  | 27359668 | 7.37E-01 | 1 |
| RAN      | 214809  | 440  | -6  | 574228  | 146672  | 0 | 1  | 1 | 0 | 50 | 48  | 20748748 | 7.37E-01 | 1 |
| C4orf33  | 98087   | 645  | -2  | 535780  | 126380  | 0 | 1  | 0 | 0 | 50 | 54  | 20805708 | 7.37E-01 | 1 |
| TSPAN8   | 233516  | 489  | -31 | 627984  | 164472  | 0 | 2  | 0 | 0 | 50 | 93  | 22219028 | 7.37E-01 | 1 |
| PDE1C    | 124074  | 828  | 6   | 1681744 | 425420  | 0 | 12 | 3 | 0 | 2  | 3   | 1061236  | 7.37E-01 | 1 |
| USP31    | 576886  | 701  | 22  | 3375592 | 1023500 | 0 | 7  | 3 | 0 | 40 | 35  | 15583544 | 7.37E-01 | 1 |
| COL15A1  | 199434  | 148  | 18  | 3529384 | 1096124 | 0 | 9  | 2 | 0 | 22 | 15  | 6998960  | 7.38E-01 | 1 |
| PPP1R9B  | 1277832 | 210  | 26  | 2016384 | 640800  | 0 | 2  | 1 | 0 | 50 | 71  | 23861612 | 7.38E-01 | 1 |
| POTEG    | 148332  | 835  | -50 | 1348172 | 326452  | 0 | 3  | 1 | 0 | 9  | 6   | 3224292  | 7.38E-01 | 1 |
| NDUFA6   | 1321127 | 363  | 65  | 398364  | 108936  | 0 | 1  | 0 | 0 | 50 | 55  | 15728436 | 7.38E-01 | 1 |

|          |         |      |     |          |         |   |    |    |   |    |     |          |          |   |
|----------|---------|------|-----|----------|---------|---|----|----|---|----|-----|----------|----------|---|
| PRKAR1A  | 662487  | 313  | -28 | 995732   | 270916  | 0 | 4  | 2  | 0 | 50 | 85  | 21558648 | 7.38E-01 | 1 |
| POLR3GL  | NaN     | NaN  | NaN | 582416   | 149164  | 0 | 1  | 1  | 0 | 50 | 117 | 39794748 | 7.38E-01 | 1 |
| LTA4H    | 364666  | 436  | 16  | 1611612  | 428268  | 0 | 4  | 1  | 0 | 41 | 37  | 15411240 | 7.38E-01 | 1 |
| MAP2K5   | 449735  | 377  | 31  | 1217164  | 311144  | 0 | 3  | 1  | 0 | 50 | 44  | 17096544 | 7.38E-01 | 1 |
| TBC1D9B  | 1626799 | 359  | 34  | 3201864  | 898188  | 0 | 8  | 5  | 0 | 50 | 46  | 18304452 | 7.38E-01 | 1 |
| GSTT2B   | 699286  | 202  | 63  | 621220   | 185120  | 0 | 2  | 1  | 0 | 47 | 61  | 15440432 | 7.38E-01 | 1 |
| PACS2    | 892593  | 289  | 40  | 2310440  | 652192  | 0 | 4  | 0  | 0 | 18 | 23  | 12290900 | 7.38E-01 | 1 |
| ZKSCAN5  | 1460222 | 332  | 56  | 2168752  | 548240  | 0 | 9  | 3  | 0 | 50 | 70  | 18313708 | 7.38E-01 | 1 |
| ZNF550   | 459366  | 828  | -31 | 965828   | 262372  | 0 | 2  | 0  | 0 | 33 | 27  | 10916384 | 7.38E-01 | 1 |
| FEN1     | 1239228 | 212  | 59  | 950876   | 274120  | 0 | 2  | 0  | 0 | 43 | 58  | 22262460 | 7.38E-01 | 1 |
| OLFM4    | 207557  | 842  | 2   | 1289788  | 364544  | 0 | 3  | 1  | 0 | 50 | 57  | 20775448 | 7.39E-01 | 1 |
| CCNY     | 158899  | 591  | 2   | 896052   | 238164  | 0 | 2  | 0  | 0 | 50 | 54  | 19372808 | 7.39E-01 | 1 |
| MTA2     | 2695768 | 217  | 42  | 1723040  | 493060  | 0 | 6  | 0  | 0 | 17 | 27  | 9232504  | 7.39E-01 | 1 |
| TTC27    | 358024  | 636  | 17  | 2210404  | 574940  | 0 | 3  | 1  | 0 | 50 | 54  | 22541564 | 7.39E-01 | 1 |
| PHACTR4  | 778726  | 182  | 29  | 1840520  | 518692  | 0 | 5  | 1  | 0 | 3  | 1   | 1089004  | 7.39E-01 | 1 |
| OR5D14   | 4183    | 1091 | -36 | 776792   | 231400  | 0 | 4  | 1  | 0 | 14 | 26  | 3895352  | 7.39E-01 | 1 |
| CRTP10-5 | 874480  | 461  | 25  | 725528   | 215380  | 0 | 2  | 0  | 0 | 50 | 76  | 22638396 | 7.39E-01 | 1 |
| DNAJC5G  | 1242113 | 182  | 45  | 506588   | 123532  | 0 | 1  | 0  | 0 | 50 | 76  | 21110800 | 7.39E-01 | 1 |
| DNAH5    | 148607  | 674  | -17 | 12001472 | 3152380 | 0 | 56 | 16 | 0 | 16 | 36  | 10797124 | 7.39E-01 | 1 |
| CDK5R2   | 922162  | 386  | 35  | 865080   | 313992  | 0 | 2  | 1  | 0 | 50 | 52  | 18596728 | 7.39E-01 | 1 |
| TRIM48   | 981     | 1138 | -38 | 599148   | 144180  | 0 | 2  | 0  | 0 | 50 | 95  | 21188052 | 7.39E-01 | 1 |
| GRHPR    | 534559  | 337  | 36  | 837668   | 252760  | 0 | 2  | 1  | 0 | 50 | 61  | 21069860 | 7.39E-01 | 1 |
| DNAJC8   | 779314  | 213  | 33  | 692776   | 157352  | 0 | 1  | 0  | 0 | 50 | 49  | 18363192 | 7.39E-01 | 1 |
| RTP4     | 377182  | 466  | 33  | 625492   | 172304  | 0 | 1  | 1  | 0 | 50 | 37  | 17546172 | 7.39E-01 | 1 |
| B9D1     | 630769  | 332  | 11  | 536136   | 146316  | 0 | 1  | 0  | 0 | 50 | 72  | 28508124 | 7.39E-01 | 1 |
| C3orf58  | 34520   | 1009 | -6  | 1092564  | 331080  | 0 | 4  | 1  | 0 | 50 | 71  | 18987972 | 7.39E-01 | 1 |
| AKR1B1   | 328321  | 415  | 9   | 840160   | 216092  | 0 | 2  | 0  | 0 | 50 | 67  | 23011484 | 7.39E-01 | 1 |
| ZFP3     | 1399774 | 343  | 26  | 1299400  | 316484  | 0 | 3  | 0  | 0 | 50 | 79  | 21015392 | 7.39E-01 | 1 |
| TYMS     | 416109  | 486  | 19  | 905664   | 237096  | 0 | 2  | 1  | 0 | 50 | 60  | 21957368 | 7.39E-01 | 1 |
| TOR1AIP2 | 470940  | 364  | 5   | 1525460  | 419368  | 0 | 4  | 1  | 0 | 50 | 51  | 22478552 | 7.39E-01 | 1 |
| EFCAB6   | 306296  | 627  | 2   | 3934156  | 1008548 | 0 | 11 | 3  | 0 | 50 | 52  | 19697836 | 7.39E-01 | 1 |
| ZC3H15   | 269890  | 299  | 10  | 1143116  | 263440  | 0 | 2  | 0  | 0 | 50 | 38  | 17890780 | 7.39E-01 | 1 |
| TSKS     | 1699718 | 192  | 47  | 1489860  | 457104  | 0 | 8  | 1  | 0 | 4  | 11  | 3068008  | 7.39E-01 | 1 |

|          |         |      |     |         |         |   |    |   |   |    |    |          |          |   |
|----------|---------|------|-----|---------|---------|---|----|---|---|----|----|----------|----------|---|
| TTC4     | 615595  | 343  | 19  | 1027060 | 256676  | 0 | 2  | 0 | 0 | 50 | 53 | 22535156 | 7.39E-01 | 1 |
| SLC8A1   | 39449   | 706  | -11 | 2566048 | 712712  | 0 | 7  | 2 | 0 | 18 | 43 | 13970152 | 7.40E-01 | 1 |
| CCT7     | 536944  | 452  | 20  | 1389468 | 400500  | 0 | 4  | 2 | 0 | 50 | 54 | 17210108 | 7.40E-01 | 1 |
| PCDH15   | 2832    | 1222 | -41 | 6411204 | 1764336 | 0 | 29 | 7 | 0 | 2  | 9  | 2297980  | 7.40E-01 | 1 |
| ZNF317   | 311030  | 471  | -63 | 1538276 | 396940  | 0 | 5  | 1 | 0 | 9  | 11 | 2373096  | 7.40E-01 | 1 |
| G6PC2    | 173915  | 724  | 7   | 917412  | 242436  | 0 | 2  | 0 | 0 | 50 | 64 | 23708176 | 7.40E-01 | 1 |
| CNBP     | 1130979 | 189  | 50  | 479176  | 114632  | 0 | 1  | 0 | 0 | 50 | 66 | 20268860 | 7.40E-01 | 1 |
| CCDC136  | 830283  | 310  | 35  | 3037036 | 736208  | 0 | 6  | 3 | 0 | 50 | 76 | 22960220 | 7.40E-01 | 1 |
| JAM2     | 534549  | 723  | 26  | 782132  | 214312  | 0 | 1  | 0 | 0 | 8  | 2  | 2225000  | 7.40E-01 | 1 |
| PTPRD    | 15780   | 1275 | -26 | 4976524 | 1371668 | 0 | 29 | 4 | 0 | 24 | 47 | 11320444 | 7.40E-01 | 1 |
| C11orf16 | 548433  | 243  | 21  | 1174444 | 350660  | 0 | 5  | 3 | 0 | 5  | 4  | 1456040  | 7.40E-01 | 1 |
| SIGLEC1  | 942842  | 353  | 32  | 4166268 | 1398012 | 0 | 9  | 2 | 0 | 7  | 3  | 3281608  | 7.40E-01 | 1 |
| VPS13C   | 115338  | 586  | 14  | 9856216 | 2560352 | 0 | 26 | 3 | 0 | 0  | 3  | 2560352  | 7.40E-01 | 1 |
| CCDC115  | 360632  | 593  | 5   | 454968  | 142044  | 0 | 1  | 1 | 0 | 50 | 63 | 20334720 | 7.40E-01 | 1 |
| CRLF1    | 1397040 | 222  | 33  | 1056608 | 332860  | 0 | 3  | 1 | 0 | 50 | 56 | 22349324 | 7.40E-01 | 1 |
| ZBTB34   | 367308  | 322  | 48  | 1259884 | 349592  | 0 | 3  | 1 | 0 | 50 | 60 | 21727036 | 7.40E-01 | 1 |
| OR2F1    | 368507  | 732  | -11 | 778572  | 244572  | 0 | 2  | 1 | 0 | 50 | 64 | 17819224 | 7.40E-01 | 1 |
| AKAP14   | 772178  | NaN  | 38  | 538628  | 126736  | 0 | 1  | 0 | 0 | 50 | 59 | 22592472 | 7.40E-01 | 1 |
| DPPA3    | 237142  | 672  | 14  | 415096  | 112496  | 0 | 1  | 1 | 0 | 38 | 49 | 13251388 | 7.40E-01 | 1 |
| FBXL21   | 489402  | 443  | 19  | 1106804 | 305092  | 0 | 3  | 0 | 0 | 50 | 52 | 16320820 | 7.40E-01 | 1 |
| GPR82    | 531498  | NaN  | 45  | 849416  | 234604  | 0 | 1  | 0 | 0 | 50 | 59 | 24984080 | 7.40E-01 | 1 |
| SMURF1   | 918974  | 379  | 46  | 1973308 | 532220  | 0 | 5  | 4 | 0 | 29 | 52 | 16181268 | 7.40E-01 | 1 |
| SYF2     | 613835  | 460  | 36  | 652192  | 157352  | 0 | 1  | 0 | 0 | 50 | 56 | 23795752 | 7.41E-01 | 1 |
| ZNF607   | 553692  | 829  | -48 | 1824144 | 426132  | 0 | 9  | 1 | 0 | 7  | 8  | 2624076  | 7.41E-01 | 1 |
| PEX11G   | 609287  | 308  | 36  | 591316  | 203276  | 0 | 1  | 0 | 0 | 50 | 64 | 23561504 | 7.41E-01 | 1 |
| ZADH2    | 73586   | 993  | 4   | 912784  | 302600  | 0 | 2  | 1 | 0 | 50 | 66 | 23179160 | 7.41E-01 | 1 |
| DMD      | 31871   | NaN  | -12 | 9956964 | 2477760 | 0 | 32 | 7 | 0 | 17 | 40 | 10617344 | 7.41E-01 | 1 |
| VIM      | 546890  | 465  | 11  | 1190108 | 340336  | 0 | 6  | 4 | 0 | 3  | 4  | 1120332  | 7.41E-01 | 1 |
| C1QTNF9  | 270913  | 589  | 44  | 830548  | 252404  | 0 | 3  | 1 | 0 | 50 | 54 | 16310140 | 7.41E-01 | 1 |
| PPEF1    | 141559  | NaN  | 17  | 1737280 | 422216  | 0 | 5  | 2 | 0 | 50 | 77 | 21383852 | 7.41E-01 | 1 |
| CHD6     | 378513  | 502  | -1  | 6981872 | 1873984 | 0 | 23 | 9 | 0 | 43 | 57 | 19317984 | 7.41E-01 | 1 |
| SSR1     | 755548  | 283  | 24  | 747600  | 201852  | 0 | 2  | 0 | 0 | 47 | 68 | 25663684 | 7.41E-01 | 1 |
| UBTD2    | 391482  | 182  | 42  | 600928  | 160556  | 0 | 1  | 0 | 0 | 50 | 45 | 17551868 | 7.41E-01 | 1 |

|          |         |      |     |         |         |   |    |   |   |    |     |          |          |   |
|----------|---------|------|-----|---------|---------|---|----|---|---|----|-----|----------|----------|---|
| ADSSL1   | 681504  | 208  | 29  | 1439664 | 428268  | 0 | 3  | 0 | 0 | 11 | 9   | 4689944  | 7.41E-01 | 1 |
| TRIM22   | 139577  | 922  | 2   | 1290500 | 338200  | 0 | 3  | 0 | 0 | 17 | 11  | 5272004  | 7.41E-01 | 1 |
| ABHD11   | 1082063 | 214  | 54  | 1008904 | 316484  | 0 | 3  | 1 | 0 | 46 | 78  | 21680756 | 7.41E-01 | 1 |
| ADSS     | 710088  | 534  | 2   | 1197584 | 317908  | 0 | 4  | 1 | 0 | 50 | 89  | 24819964 | 7.41E-01 | 1 |
| SPP2     | 288133  | 558  | 9   | 576364  | 134924  | 0 | 1  | 0 | 0 | 50 | 60  | 22433340 | 7.41E-01 | 1 |
| APRT     | 813333  | 189  | 51  | 449984  | 149164  | 0 | 1  | 1 | 0 | 50 | 71  | 20606704 | 7.41E-01 | 1 |
| PERP     | 329471  | 484  | 24  | 488788  | 141332  | 0 | 2  | 1 | 0 | 4  | 6   | 1605916  | 7.41E-01 | 1 |
| INSRR    | NaN     | NaN  | NaN | 3285168 | 995376  | 0 | 9  | 3 | 0 | 50 | 119 | 40640960 | 7.41E-01 | 1 |
| IQSEC1   | 516922  | 406  | 48  | 2873632 | 879320  | 0 | 7  | 3 | 0 | 22 | 26  | 11074804 | 7.41E-01 | 1 |
| GIMAP1   | 734961  | 689  | 14  | 748668  | 243504  | 0 | 6  | 3 | 0 | 4  | 5   | 941264   | 7.41E-01 | 1 |
| BRD9     | 875343  | 491  | 30  | 1643296 | 343184  | 0 | 4  | 2 | 0 | 50 | 62  | 19703532 | 7.42E-01 | 1 |
| KLHL32   | 123818  | 1288 | -2  | 1592744 | 439660  | 0 | 3  | 1 | 0 | 50 | 39  | 19497764 | 7.42E-01 | 1 |
| NAV2     | 164305  | 496  | 9   | 6243172 | 1824500 | 0 | 18 | 4 | 0 | 1  | 4   | 2165548  | 7.42E-01 | 1 |
| ALDH9A1  | 321831  | 408  | 0   | 1328592 | 377004  | 0 | 5  | 0 | 0 | 1  | 0   | 490568   | 7.42E-01 | 1 |
| PRMT2    | 530282  | 377  | 28  | 1133504 | 299752  | 0 | 1  | 0 | 0 | 47 | 55  | 19319052 | 7.42E-01 | 1 |
| OSBPL7   | 1118277 | 217  | 27  | 2179432 | 615524  | 0 | 6  | 2 | 0 | 50 | 61  | 18316556 | 7.42E-01 | 1 |
| KCNK9    | 62115   | 562  | 5   | 936992  | 273052  | 0 | 3  | 2 | 0 | 7  | 9   | 2890720  | 7.42E-01 | 1 |
| WNT9A    | 673663  | 406  | -4  | 906020  | 283732  | 0 | 2  | 0 | 0 | 50 | 48  | 18273836 | 7.42E-01 | 1 |
| IRF9     | 974559  | 220  | 41  | 1011040 | 284444  | 0 | 2  | 1 | 0 | 50 | 62  | 24565780 | 7.42E-01 | 1 |
| ZBTB25   | 670466  | 221  | 54  | 1108940 | 298684  | 0 | 1  | 0 | 0 | 50 | 68  | 23232204 | 7.42E-01 | 1 |
| MAPK12   | 941692  | 217  | 60  | 960488  | 265576  | 0 | 1  | 0 | 0 | 15 | 7   | 6050220  | 7.42E-01 | 1 |
| CACNB2   | 74282   | 408  | 4   | 1967612 | 530440  | 0 | 5  | 0 | 0 | 13 | 10  | 4788556  | 7.42E-01 | 1 |
| FRS3     | 429684  | 341  | 47  | 1220724 | 380208  | 0 | 3  | 0 | 0 | 46 | 51  | 18574300 | 7.42E-01 | 1 |
| HLA-DQA2 | 1373102 | 417  | 37  | 654328  | 185120  | 0 | 3  | 0 | 0 | 11 | 17  | 4212192  | 7.42E-01 | 1 |
| MAGEB16  | 3857    | NaN  | -24 | 815596  | 229976  | 0 | 1  | 1 | 0 | 50 | 126 | 29477156 | 7.42E-01 | 1 |
| INHBB    | 218512  | 446  | 15  | 991816  | 321824  | 0 | 3  | 2 | 0 | 13 | 20  | 6623024  | 7.42E-01 | 1 |
| MGST1    | 266051  | 641  | -23 | 398008  | 114632  | 0 | 1  | 0 | 0 | 50 | 91  | 25580024 | 7.42E-01 | 1 |
| ASMTL    | NaN     | NaN  | NaN | 1656112 | 480956  | 0 | 5  | 3 | 0 | 50 | 119 | 40126540 | 7.43E-01 | 1 |
| MYL6     | 2878044 | 171  | 40  | 441440  | 106444  | 0 | 1  | 0 | 0 | 50 | 64  | 20725608 | 7.43E-01 | 1 |
| MOSPD2   | 111964  | NaN  | 15  | 1396232 | 326452  | 0 | 4  | 0 | 0 | 50 | 74  | 23618108 | 7.43E-01 | 1 |
| KSR1     | 171783  | 444  | -9  | 1960136 | 561412  | 0 | 5  | 0 | 0 | 1  | 2   | 1472416  | 7.43E-01 | 1 |
| FKBP14   | 661477  | 560  | 23  | 556428  | 135636  | 0 | 1  | 0 | 0 | 50 | 81  | 25997256 | 7.43E-01 | 1 |
| BLMH     | 516668  | 184  | 26  | 1217876 | 290140  | 0 | 5  | 1 | 0 | 50 | 83  | 21999732 | 7.43E-01 | 1 |

|          |         |      |     |         |         |   |    |   |   |    |    |          |          |   |
|----------|---------|------|-----|---------|---------|---|----|---|---|----|----|----------|----------|---|
| HEPH     | 282730  | NaN  | 4   | 3134224 | 837668  | 0 | 10 | 1 | 0 | 14 | 14 | 5370616  | 7.43E-01 | 1 |
| SOCS5    | 630448  | 252  | 34  | 1359564 | 365256  | 0 | 2  | 0 | 0 | 15 | 12 | 7630148  | 7.43E-01 | 1 |
| PDS5A    | 606929  | 175  | 42  | 3543268 | 913496  | 0 | 8  | 2 | 0 | 50 | 56 | 21538000 | 7.43E-01 | 1 |
| RASGEF1A | 424273  | 492  | -11 | 1267360 | 328232  | 0 | 3  | 1 | 0 | 50 | 78 | 25563648 | 7.43E-01 | 1 |
| TEKT1    | 1077116 | 438  | 14  | 1085088 | 289428  | 0 | 3  | 3 | 0 | 27 | 31 | 6642604  | 7.44E-01 | 1 |
| IFIT1    | 253827  | 213  | 17  | 1224996 | 313992  | 0 | 3  | 0 | 0 | 44 | 34 | 14070544 | 7.44E-01 | 1 |
| NIPAL4   | 266195  | 1087 | 41  | 1152016 | 365612  | 0 | 2  | 0 | 0 | 9  | 6  | 2436108  | 7.44E-01 | 1 |
| SAMD10   | 1152034 | 208  | 48  | 510504  | 156996  | 0 | 1  | 0 | 0 | 50 | 78 | 24047088 | 7.44E-01 | 1 |
| EIF3F    | 135129  | 587  | 4   | 896052  | 283020  | 0 | 2  | 1 | 0 | 50 | 63 | 23312304 | 7.44E-01 | 1 |
| UNC5C    | 25813   | 910  | -12 | 2370604 | 679604  | 0 | 10 | 5 | 0 | 8  | 18 | 5692440  | 7.44E-01 | 1 |
| PFAS     | 870950  | 218  | 18  | 3354944 | 1050556 | 0 | 7  | 2 | 0 | 21 | 15 | 9161304  | 7.44E-01 | 1 |
| ALS2CR12 | 554245  | 411  | 31  | 1218232 | 270560  | 0 | 3  | 1 | 0 | 50 | 58 | 20665088 | 7.44E-01 | 1 |
| SERINC1  | 140855  | 973  | -19 | 1180140 | 315060  | 0 | 2  | 1 | 0 | 50 | 87 | 22963780 | 7.44E-01 | 1 |
| OR4F15   | 215780  | 643  | -16 | 774300  | 226416  | 0 | 2  | 1 | 0 | 42 | 59 | 17722748 | 7.44E-01 | 1 |
| MRAS     | 201973  | 408  | 19  | 552512  | 138484  | 0 | 2  | 1 | 0 | 24 | 24 | 7548624  | 7.44E-01 | 1 |
| YWHAH    | 531528  | 344  | -1  | 626560  | 169100  | 0 | 1  | 0 | 0 | 50 | 54 | 19869072 | 7.44E-01 | 1 |
| PLXNB3   | 2103463 | NaN  | 30  | 4847652 | 1549668 | 0 | 9  | 2 | 0 | 14 | 18 | 7222884  | 7.44E-01 | 1 |
| AGTR2    | 224760  | NaN  | 7   | 911360  | 259168  | 0 | 3  | 0 | 0 | 22 | 26 | 8958740  | 7.44E-01 | 1 |
| STAT5B   | 2101162 | 190  | 31  | 2054120 | 547528  | 0 | 5  | 2 | 0 | 14 | 20 | 7266316  | 7.45E-01 | 1 |
| SYTL5    | 106836  | NaN  | 19  | 1965120 | 515844  | 0 | 4  | 0 | 0 | 34 | 30 | 16596720 | 7.45E-01 | 1 |
| GABRA5   | 22005   | 1346 | -56 | 1199008 | 322892  | 0 | 5  | 0 | 0 | 27 | 62 | 15565032 | 7.45E-01 | 1 |
| MRPS15   | 581032  | 347  | 31  | 676044  | 182628  | 0 | 1  | 0 | 0 | 33 | 33 | 16739476 | 7.45E-01 | 1 |
| LAMA3    | 317706  | 216  | 60  | 8776824 | 2410476 | 0 | 32 | 6 | 0 | 15 | 24 | 7679632  | 7.45E-01 | 1 |
| TOE1     | 994992  | 249  | 29  | 1326812 | 378784  | 0 | 3  | 0 | 0 | 40 | 40 | 17539408 | 7.45E-01 | 1 |
| CCDC3    | 202131  | 444  | 13  | 674264  | 202564  | 0 | 1  | 1 | 0 | 50 | 49 | 21382784 | 7.45E-01 | 1 |
| CD58     | 692758  | 418  | 19  | 659668  | 168032  | 0 | 1  | 1 | 0 | 30 | 39 | 13798204 | 7.45E-01 | 1 |
| MDGA2    | 14033   | 1195 | -46 | 2459604 | 674976  | 0 | 9  | 2 | 0 | 12 | 26 | 6462468  | 7.45E-01 | 1 |
| FGL2     | 312362  | 639  | 30  | 1127452 | 288716  | 0 | 3  | 1 | 0 | 24 | 27 | 9725920  | 7.45E-01 | 1 |
| PTPRO    | 367328  | 560  | -14 | 3184420 | 825920  | 0 | 8  | 2 | 0 | 16 | 15 | 5969764  | 7.45E-01 | 1 |
| HDAC4    | 66632   | 584  | 22  | 2770748 | 812392  | 0 | 5  | 4 | 0 | 50 | 49 | 21234688 | 7.45E-01 | 1 |
| MON1B    | 60048   | 1058 | -19 | 1325744 | 451408  | 0 | 2  | 2 | 0 | 50 | 67 | 20710300 | 7.45E-01 | 1 |
| PIK3R2   | 1249693 | 226  | 42  | 1829840 | 565684  | 0 | 4  | 2 | 0 | 28 | 50 | 15908216 | 7.45E-01 | 1 |
| ITGA9    | 477042  | 601  | 18  | 2692428 | 744396  | 0 | 9  | 4 | 0 | 31 | 45 | 10756184 | 7.45E-01 | 1 |



|           |         |      |     |         |         |   |    |   |   |    |     |          |          |   |
|-----------|---------|------|-----|---------|---------|---|----|---|---|----|-----|----------|----------|---|
| ZNF830    | 268361  | 579  | -14 | 938772  | 260592  | 0 | 3  | 3 | 0 | 14 | 10  | 3349248  | 7.46E-01 | 1 |
| SLC17A7   | 2173457 | 290  | 44  | 1425424 | 419012  | 0 | 3  | 3 | 0 | 50 | 67  | 19850560 | 7.46E-01 | 1 |
| MMMECR1   | 588745  | 248  | 39  | 791744  | 230332  | 0 | 2  | 2 | 0 | 5  | 7   | 2853340  | 7.46E-01 | 1 |
| CARS      | 547495  | 237  | 43  | 2263092 | 557496  | 0 | 3  | 2 | 0 | 50 | 41  | 18867288 | 7.46E-01 | 1 |
| C20orf196 | 365507  | 199  | 12  | 528304  | 140264  | 0 | 1  | 0 | 0 | 50 | 53  | 21209768 | 7.46E-01 | 1 |
| ACO1      | 290567  | 424  | -18 | 2302964 | 634036  | 0 | 6  | 1 | 0 | 50 | 44  | 18681456 | 7.46E-01 | 1 |
| ACAP2     | 431673  | 561  | 43  | 2084024 | 505876  | 0 | 5  | 2 | 0 | 50 | 61  | 20525536 | 7.46E-01 | 1 |
| MAP1B     | 410285  | 427  | 30  | 6167700 | 1768608 | 0 | 19 | 3 | 0 | 5  | 5   | 3234972  | 7.46E-01 | 1 |
| AGAP4     | 136259  | NaN  | 34  | 1680676 | 472412  | 0 | 3  | 2 | 0 | 13 | 9   | 5164492  | 7.47E-01 | 1 |
| MMP12     | 468929  | 506  | -21 | 1237456 | 311144  | 0 | 3  | 0 | 0 | 5  | 4   | 2495560  | 7.47E-01 | 1 |
| DTWD2     | 305376  | 554  | 8   | 764332  | 217160  | 0 | 1  | 1 | 0 | 50 | 69  | 24092300 | 7.47E-01 | 1 |
| POU3F4    | 12933   | NaN  | -23 | 892848  | 269136  | 0 | 3  | 1 | 0 | 50 | 114 | 26838484 | 7.47E-01 | 1 |
| GPC4      | 66980   | NaN  | 40  | 1445360 | 373444  | 0 | 3  | 1 | 0 | 50 | 72  | 22173460 | 7.47E-01 | 1 |
| KCNN1     | 1328847 | 217  | 35  | 1354224 | 427200  | 0 | 5  | 1 | 0 | 46 | 63  | 18587828 | 7.47E-01 | 1 |
| HS6ST1    | 406221  | 635  | 24  | 1015312 | 311144  | 0 | 2  | 0 | 0 | 46 | 44  | 19164548 | 7.47E-01 | 1 |
| RPN1      | 1216952 | 303  | 49  | 1536496 | 452120  | 0 | 3  | 1 | 0 | 50 | 62  | 19157072 | 7.47E-01 | 1 |
| RNH1      | 2088403 | 221  | 50  | 1162340 | 360628  | 0 | 1  | 1 | 0 | 50 | 63  | 21242164 | 7.47E-01 | 1 |
| PTH2R     | 221399  | 671  | 0   | 1435748 | 380920  | 0 | 6  | 3 | 0 | 22 | 24  | 7140292  | 7.47E-01 | 1 |
| PSMD1     | 1175473 | 345  | 36  | 2508020 | 651124  | 0 | 6  | 0 | 0 | 2  | 2   | 1417592  | 7.47E-01 | 1 |
| NPAT      | 411907  | 695  | 26  | 3639744 | 1010328 | 0 | 10 | 3 | 0 | 8  | 9   | 4479904  | 7.47E-01 | 1 |
| ALDH8A1   | 152922  | 364  | 19  | 1238524 | 352796  | 0 | 3  | 1 | 0 | 50 | 56  | 19542620 | 7.47E-01 | 1 |
| CWC15     | 305262  | 504  | -10 | 611252  | 150232  | 0 | 1  | 0 | 0 | 50 | 57  | 24306256 | 7.47E-01 | 1 |
| C8orf33   | 454161  | 440  | 8   | 583484  | 172660  | 0 | 1  | 0 | 0 | 50 | 71  | 24081620 | 7.47E-01 | 1 |
| VN1R4     | 427680  | 921  | -46 | 746176  | 220364  | 0 | 2  | 1 | 0 | 50 | 59  | 17329368 | 7.47E-01 | 1 |
| ZSCAN10   | 1626425 | 234  | 44  | 1786764 | 558564  | 0 | 6  | 3 | 0 | 50 | 77  | 22657976 | 7.47E-01 | 1 |
| CRTP4-1   | NaN     | NaN  | NaN | 500892  | 129228  | 0 | 1  | 0 | 0 | 50 | 116 | 39774812 | 7.47E-01 | 1 |
| CNTN1     | 22448   | 1105 | -22 | 2662524 | 700608  | 0 | 11 | 6 | 0 | 48 | 81  | 19416240 | 7.47E-01 | 1 |
| NTF3      | 28523   | 735  | 17  | 676756  | 197936  | 0 | 1  | 0 | 0 | 50 | 47  | 20476408 | 7.47E-01 | 1 |
| ASAP2     | 661229  | 340  | 34  | 2641164 | 700608  | 0 | 8  | 4 | 0 | 14 | 22  | 7821676  | 7.47E-01 | 1 |
| FBXO21    | 206608  | 213  | 20  | 1637600 | 426844  | 0 | 4  | 3 | 0 | 15 | 16  | 4887880  | 7.47E-01 | 1 |
| TCF19     | 3364017 | 401  | 19  | 838380  | 278748  | 0 | 2  | 0 | 0 | 45 | 41  | 13756552 | 7.47E-01 | 1 |
| CRIP3     | 1293543 | 363  | 51  | 547172  | 139552  | 0 | 1  | 0 | 0 | 50 | 71  | 24456132 | 7.48E-01 | 1 |
| TRMT12    | 489180  | 476  | 13  | 1102888 | 335708  | 0 | 5  | 0 | 0 | 3  | 7   | 2269856  | 7.48E-01 | 1 |

|          |         |     |     |         |        |   |    |   |   |    |     |          |          |   |
|----------|---------|-----|-----|---------|--------|---|----|---|---|----|-----|----------|----------|---|
| ANGPTL6  | 1675365 | 272 | 15  | 1155220 | 377360 | 0 | 3  | 0 | 0 | 1  | 0   | 604132   | 7.48E-01 | 1 |
| NEUROG3  | 824126  | 519 | 31  | 509792  | 182272 | 0 | 1  | 0 | 0 | 50 | 58  | 21443660 | 7.48E-01 | 1 |
| ZBTB17   | 856018  | 170 | 31  | 2071208 | 566752 | 0 | 6  | 3 | 0 | 50 | 100 | 28094452 | 7.48E-01 | 1 |
| NEK2     | 391935  | 167 | 9   | 1154152 | 304736 | 0 | 4  | 0 | 0 | 16 | 19  | 6368840  | 7.48E-01 | 1 |
| OR2T10   | 116628  | 850 | -20 | 777860  | 223924 | 0 | 5  | 3 | 0 | 4  | 8   | 1241728  | 7.48E-01 | 1 |
| FBXO16   | 295355  | 204 | 47  | 778216  | 194732 | 0 | 1  | 0 | 0 | 50 | 50  | 19317272 | 7.48E-01 | 1 |
| CLDN7    | 1782958 | 316 | 21  | 546816  | 145248 | 0 | 1  | 2 | 0 | 16 | 13  | 4887168  | 7.48E-01 | 1 |
| ERO1LB   | 498153  | 632 | 9   | 1255968 | 307584 | 0 | 3  | 0 | 0 | 3  | 1   | 1010684  | 7.48E-01 | 1 |
| NEXN     | 367341  | 256 | 1   | 1805988 | 411180 | 0 | 3  | 0 | 0 | 9  | 9   | 5883612  | 7.48E-01 | 1 |
| CCDC17   | 873800  | 161 | 27  | 1533292 | 514064 | 0 | 4  | 0 | 0 | 3  | 4   | 1792816  | 7.48E-01 | 1 |
| SEPHS1   | 246468  | 433 | 33  | 1011752 | 281596 | 0 | 2  | 0 | 0 | 50 | 59  | 23759084 | 7.48E-01 | 1 |
| CDKN3    | 332892  | 474 | 6   | 567108  | 145248 | 0 | 1  | 0 | 0 | 50 | 46  | 19065224 | 7.48E-01 | 1 |
| MARK3    | 937868  | 161 | 36  | 1962984 | 525456 | 0 | 4  | 1 | 0 | 50 | 65  | 22886884 | 7.48E-01 | 1 |
| TPCN1    | 429315  | 206 | 36  | 2328952 | 639020 | 0 | 4  | 3 | 0 | 50 | 54  | 20956652 | 7.48E-01 | 1 |
| BNIP3L   | 194595  | 376 | 26  | 579212  | 147028 | 0 | 1  | 0 | 0 | 50 | 53  | 22298416 | 7.48E-01 | 1 |
| YY2      | 93077   | NaN | 16  | 940552  | 254540 | 0 | 2  | 0 | 0 | 50 | 55  | 20174520 | 7.48E-01 | 1 |
| ABCC12   | 229669  | 628 | -27 | 3494496 | 982560 | 0 | 13 | 7 | 0 | 35 | 65  | 16450048 | 7.48E-01 | 1 |
| ZFP42    | 19937   | 551 | -33 | 784624  | 216092 | 0 | 3  | 2 | 0 | 23 | 41  | 9150268  | 7.48E-01 | 1 |
| SRPR     | 385871  | 426 | 29  | 1638668 | 464224 | 0 | 3  | 0 | 0 | 34 | 32  | 16734848 | 7.49E-01 | 1 |
| UCN3     | 711034  | 519 | -1  | 399432  | 123888 | 0 | 1  | 0 | 0 | 50 | 96  | 24023592 | 7.49E-01 | 1 |
| ZBTB33   | 588956  | NaN | 28  | 1690644 | 469920 | 0 | 5  | 1 | 0 | 28 | 28  | 10349276 | 7.49E-01 | 1 |
| ITIH5    | 199273  | 528 | -3  | 2499476 | 721612 | 0 | 5  | 2 | 0 | 29 | 27  | 10231440 | 7.49E-01 | 1 |
| LHFPL2   | 214373  | 434 | 44  | 569600  | 168388 | 0 | 1  | 1 | 0 | 50 | 70  | 24437264 | 7.49E-01 | 1 |
| XDH      | 99156   | 725 | 18  | 3453200 | 972592 | 0 | 8  | 2 | 0 | 50 | 47  | 20118628 | 7.49E-01 | 1 |
| TRAPPC6A | 1230654 | 243 | 41  | 447848  | 133144 | 0 | 1  | 1 | 0 | 50 | 79  | 24609568 | 7.49E-01 | 1 |
| MKKS     | 166085  | 252 | -14 | 1426136 | 418300 | 0 | 3  | 0 | 0 | 50 | 65  | 26436560 | 7.49E-01 | 1 |
| TDG      | 1190703 | 281 | 40  | 1086156 | 269136 | 0 | 4  | 0 | 0 | 50 | 90  | 26642684 | 7.49E-01 | 1 |
| PRDM1    | 162338  | 278 | 44  | 2093992 | 589892 | 0 | 6  | 3 | 0 | 50 | 71  | 19761204 | 7.49E-01 | 1 |
| OLFML3   | 365516  | 596 | 7   | 1001784 | 310788 | 0 | 3  | 1 | 0 | 50 | 72  | 21295920 | 7.49E-01 | 1 |
| JAK1     | 269434  | 396 | -5  | 3044512 | 758636 | 0 | 4  | 1 | 0 | 43 | 34  | 18422288 | 7.49E-01 | 1 |
| ZBTB8A   | 1429703 | 230 | 21  | 1130656 | 297260 | 0 | 4  | 0 | 0 | 4  | 4   | 1288720  | 7.49E-01 | 1 |
| RABGGTA  | 915114  | 220 | 38  | 1451056 | 439304 | 0 | 5  | 3 | 0 | 50 | 69  | 21077692 | 7.49E-01 | 1 |
| OR52K2   | 264090  | 862 | -7  | 767180  | 246352 | 0 | 3  | 2 | 0 | 3  | 4   | 1513356  | 7.49E-01 | 1 |

|          |         |      |     |         |         |   |    |   |   |    |     |          |          |   |
|----------|---------|------|-----|---------|---------|---|----|---|---|----|-----|----------|----------|---|
| LMO7     | 197158  | 342  | 46  | 4467444 | 1135284 | 0 | 11 | 4 | 0 | 24 | 28  | 9198684  | 7.49E-01 | 1 |
| FGF19    | 465152  | 561  | 38  | 537560  | 166252  | 0 | 1  | 0 | 0 | 50 | 60  | 20189828 | 7.49E-01 | 1 |
| CACNB1   | 1426821 | 212  | 31  | 1739060 | 515488  | 0 | 3  | 3 | 0 | 50 | 55  | 19657964 | 7.49E-01 | 1 |
| KRT8     | 1781225 | 288  | 27  | 1233540 | 348168  | 0 | 3  | 1 | 0 | 13 | 20  | 5681404  | 7.50E-01 | 1 |
| TRAPPC4  | 1457410 | 180  | 55  | 559632  | 162336  | 0 | 1  | 0 | 0 | 50 | 46  | 18727024 | 7.50E-01 | 1 |
| AP3B2    | 509813  | 608  | 16  | 2707024 | 788540  | 0 | 10 | 5 | 0 | 32 | 52  | 12801404 | 7.50E-01 | 1 |
| VPS72    | 1562281 | 184  | 33  | 908868  | 284088  | 0 | 4  | 1 | 0 | 5  | 6   | 1818092  | 7.50E-01 | 1 |
| PER1     | 1381225 | 202  | 37  | 3192608 | 1033468 | 0 | 6  | 1 | 0 | 3  | 1   | 1651128  | 7.50E-01 | 1 |
| VANGL1   | 71378   | 604  | 7   | 1318624 | 389108  | 0 | 4  | 1 | 0 | 50 | 74  | 22692152 | 7.50E-01 | 1 |
| ARG1     | 147816  | 864  | 7   | 822360  | 244572  | 0 | 2  | 0 | 0 | 50 | 56  | 19662592 | 7.50E-01 | 1 |
| TMEM56   | 228305  | 452  | -8  | 692776  | 178712  | 0 | 1  | 1 | 0 | 50 | 48  | 20399156 | 7.50E-01 | 1 |
| SUSD1    | 536415  | 164  | 32  | 1930588 | 537560  | 0 | 6  | 1 | 0 | 49 | 65  | 19455400 | 7.50E-01 | 1 |
| HAS3     | 1179391 | 201  | 24  | 1456752 | 446424  | 0 | 6  | 3 | 0 | 11 | 18  | 4871148  | 7.50E-01 | 1 |
| SLC25A15 | 270527  | 470  | 44  | 773944  | 219296  | 0 | 2  | 0 | 0 | 50 | 78  | 23838472 | 7.50E-01 | 1 |
| IDO1     | 11280   | 520  | 7   | 1051980 | 280884  | 0 | 2  | 0 | 0 | 14 | 16  | 7354960  | 7.50E-01 | 1 |
| PALM     | 1914670 | 200  | 23  | 978644  | 298684  | 0 | 3  | 1 | 0 | 50 | 80  | 21759432 | 7.50E-01 | 1 |
| ADAM9    | 389317  | 428  | 22  | 2161276 | 557852  | 0 | 5  | 1 | 0 | 50 | 56  | 26781168 | 7.50E-01 | 1 |
| VHL      | 825905  | 170  | 39  | 532576  | 161624  | 0 | 1  | 1 | 0 | 50 | 47  | 17447560 | 7.50E-01 | 1 |
| GOT2     | 572798  | 188  | 2   | 1108584 | 310788  | 0 | 1  | 0 | 0 | 50 | 64  | 20692144 | 7.50E-01 | 1 |
| HES3     | 643428  | 205  | 30  | 462800  | 151300  | 0 | 1  | 0 | 0 | 50 | 47  | 15784328 | 7.50E-01 | 1 |
| CD99     | NaN     | NaN  | NaN | 505164  | 129228  | 0 | 1  | 0 | 0 | 50 | 116 | 39774812 | 7.50E-01 | 1 |
| ZNF492   | 51041   | 1399 | -76 | 1389824 | 327520  | 0 | 7  | 2 | 0 | 50 | 84  | 16653324 | 7.50E-01 | 1 |
| ANGPTL3  | NaN     | NaN  | NaN | 1212536 | 292276  | 0 | 3  | 0 | 0 | 50 | 116 | 39937860 | 7.50E-01 | 1 |
| SIRT5    | 277510  | 425  | 37  | 833040  | 245640  | 0 | 2  | 1 | 0 | 50 | 65  | 20454336 | 7.50E-01 | 1 |
| ESF1     | 123437  | 617  | -10 | 2286232 | 499112  | 0 | 7  | 0 | 0 | 23 | 26  | 9689608  | 7.50E-01 | 1 |
| SLC25A38 | 160739  | 595  | 32  | 768960  | 233892  | 0 | 1  | 1 | 0 | 49 | 47  | 20476764 | 7.50E-01 | 1 |
| C10orf82 | 195359  | 618  | -17 | 410112  | 103596  | 0 | 1  | 1 | 0 | 5  | 12  | 3265588  | 7.51E-01 | 1 |
| MGMT     | 83542   | 1073 | -25 | 592740  | 192240  | 0 | 2  | 0 | 0 | 50 | 133 | 29128632 | 7.51E-01 | 1 |
| BACH2    | 294466  | 601  | 13  | 2110012 | 604844  | 0 | 10 | 5 | 0 | 24 | 42  | 8683196  | 7.51E-01 | 1 |
| LINGO1   | 400940  | 503  | 38  | 1505880 | 490212  | 0 | 4  | 2 | 0 | 50 | 51  | 18811396 | 7.51E-01 | 1 |
| NLRP4    | 959325  | 484  | -56 | 2545400 | 681028  | 0 | 13 | 5 | 0 | 50 | 132 | 30544088 | 7.51E-01 | 1 |
| PSD2     | 714699  | 223  | 64  | 1958356 | 574940  | 0 | 11 | 2 | 0 | 3  | 4   | 1256324  | 7.51E-01 | 1 |
| DCAF6    | 505920  | 417  | 13  | 2291216 | 614812  | 0 | 6  | 2 | 0 | 50 | 51  | 19688936 | 7.51E-01 | 1 |

|          |         |      |     |          |         |   |    |    |   |    |    |          |          |   |
|----------|---------|------|-----|----------|---------|---|----|----|---|----|----|----------|----------|---|
| MED25    | 1673246 | 205  | 37  | 1865796  | 607692  | 0 | 5  | 1  | 0 | 13 | 23 | 7061972  | 7.51E-01 | 1 |
| TNFSF9   | 836909  | 212  | 21  | 599504   | 228196  | 0 | 1  | 2  | 0 | 24 | 20 | 7359944  | 7.51E-01 | 1 |
| RNF149   | 442031  | 259  | 20  | 1007480  | 302956  | 0 | 3  | 1  | 0 | 50 | 53 | 19261024 | 7.51E-01 | 1 |
| SYCP2    | 73470   | 842  | -30 | 4138856  | 950164  | 0 | 18 | 1  | 0 | 0  | 1  | 950164   | 7.51E-01 | 1 |
| SLC22A16 | 248863  | 469  | 20  | 1464940  | 419012  | 0 | 4  | 1  | 0 | 50 | 63 | 22854132 | 7.51E-01 | 1 |
| ABCA13   | 93300   | 878  | -11 | 12878300 | 3410836 | 0 | 40 | 14 | 0 | 4  | 17 | 4860824  | 7.51E-01 | 1 |
| ATP6AP1  | 2277674 | NaN  | 40  | 1186192  | 363476  | 0 | 2  | 0  | 0 | 50 | 46 | 20570392 | 7.51E-01 | 1 |
| LCK      | 1427362 | 210  | 43  | 1326456  | 359916  | 0 | 3  | 1  | 0 | 50 | 69 | 25771552 | 7.51E-01 | 1 |
| SERINC5  | 362413  | 673  | 36  | 1241372  | 328588  | 0 | 1  | 1  | 0 | 50 | 65 | 23237900 | 7.51E-01 | 1 |
| GABBR2   | 398895  | 584  | 32  | 2406560  | 688504  | 0 | 4  | 2  | 0 | 16 | 8  | 5855488  | 7.51E-01 | 1 |
| ASAH2    | 377258  | 409  | 14  | 2025284  | 560344  | 0 | 6  | 0  | 0 | 7  | 3  | 1954440  | 7.51E-01 | 1 |
| ZSCAN5B  | 486579  | 522  | -32 | 1249916  | 352084  | 0 | 4  | 0  | 0 | 33 | 32 | 9602744  | 7.51E-01 | 1 |
| CMBL     | 625000  | 192  | 9   | 649344   | 160200  | 0 | 1  | 0  | 0 | 50 | 55 | 21476056 | 7.51E-01 | 1 |
| SFXN5    | 453374  | 421  | 27  | 883592   | 264508  | 0 | 2  | 1  | 0 | 50 | 68 | 23944560 | 7.51E-01 | 1 |
| ROR1     | 138354  | 492  | -3  | 2372740  | 673196  | 0 | 6  | 2  | 0 | 18 | 25 | 7273792  | 7.52E-01 | 1 |
| ANO1     | 763592  | 286  | 35  | 2591324  | 677824  | 0 | 8  | 5  | 0 | 26 | 37 | 11273808 | 7.52E-01 | 1 |
| UNC93A   | 254009  | 704  | 1   | 1147388  | 349948  | 0 | 2  | 3  | 0 | 14 | 31 | 8777180  | 7.52E-01 | 1 |
| RAD51AP2 | 135410  | 1311 | 2   | 3014252  | 715204  | 0 | 10 | 1  | 0 | 9  | 5  | 2831980  | 7.52E-01 | 1 |
| ZBTB44   | 658636  | 276  | 18  | 1157000  | 318976  | 0 | 2  | 0  | 0 | 20 | 18 | 8570344  | 7.52E-01 | 1 |
| CAMK2D   | 166680  | 632  | 21  | 1432544  | 347812  | 0 | 3  | 0  | 0 | 50 | 56 | 23081616 | 7.52E-01 | 1 |
| TMEM202  | 1116695 | 366  | 41  | 706304   | 188680  | 0 | 3  | 1  | 0 | 50 | 77 | 17950232 | 7.52E-01 | 1 |
| PAFAH2   | 774988  | 221  | 31  | 1023144  | 278748  | 0 | 3  | 1  | 0 | 50 | 72 | 22183072 | 7.52E-01 | 1 |
| PTGDR    | 405022  | 533  | 18  | 865080   | 294768  | 0 | 2  | 1  | 0 | 42 | 61 | 17033532 | 7.52E-01 | 1 |
| CRTP4-1  | 832368  | 459  | -9  | 513352   | 135992  | 0 | 1  | 0  | 0 | 50 | 50 | 15460012 | 7.52E-01 | 1 |
| FGF12    | 34070   | 937  | 0   | 642224   | 172660  | 0 | 3  | 3  | 0 | 2  | 8  | 1378076  | 7.52E-01 | 1 |
| TMEM41B  | 669286  | 170  | 20  | 758636   | 217516  | 0 | 1  | 0  | 0 | 50 | 57 | 25092660 | 7.52E-01 | 1 |
| NF1      | 462449  | 396  | 26  | 7422244  | 1983632 | 0 | 30 | 9  | 0 | 5  | 11 | 2812756  | 7.52E-01 | 1 |
| TRADD    | 1093307 | 150  | 47  | 758636   | 261304  | 0 | 1  | 0  | 0 | 41 | 31 | 16107220 | 7.52E-01 | 1 |
| ATP6V0A2 | 953707  | 315  | 40  | 2238172  | 588824  | 0 | 6  | 1  | 0 | 11 | 21 | 5673216  | 7.53E-01 | 1 |
| METTL8   | 515299  | 342  | 49  | 1079392  | 266288  | 0 | 2  | 0  | 0 | 40 | 40 | 15863716 | 7.53E-01 | 1 |
| SEMA4G   | 1020226 | 247  | 40  | 2222508  | 646140  | 0 | 5  | 5  | 0 | 50 | 62 | 20159924 | 7.53E-01 | 1 |
| TESC     | 208178  | 290  | 16  | 576008   | 142756  | 0 | 1  | 0  | 0 | 50 | 39 | 15876176 | 7.53E-01 | 1 |
| ASCL1    | 21203   | 964  | 3   | 583128   | 180492  | 0 | 1  | 0  | 0 | 50 | 64 | 23226508 | 7.53E-01 | 1 |

|         |         |      |     |         |         |   |    |   |   |    |     |          |          |   |
|---------|---------|------|-----|---------|---------|---|----|---|---|----|-----|----------|----------|---|
| JAALADL | 58421   | 1139 | -15 | 2055900 | 552156  | 0 | 6  | 1 | 0 | 50 | 68  | 25840260 | 7.53E-01 | 1 |
| PLEKHM1 | 748554  | 327  | 12  | 2640096 | 793524  | 0 | 5  | 4 | 0 | 50 | 71  | 23705684 | 7.53E-01 | 1 |
| ADCY1   | 287931  | 686  | 11  | 2793888 | 877896  | 0 | 6  | 3 | 0 | 50 | 69  | 20748036 | 7.53E-01 | 1 |
| GSTA2   | 539666  | 498  | 11  | 592740  | 147384  | 0 | 1  | 0 | 0 | 50 | 73  | 21581432 | 7.53E-01 | 1 |
| BBS12   | 134067  | 172  | 14  | 1776084 | 506232  | 0 | 5  | 2 | 0 | 50 | 56  | 18910364 | 7.53E-01 | 1 |
| LGALS9  | 186737  | 462  | -5  | 923464  | 259880  | 0 | 2  | 1 | 0 | 48 | 47  | 17360696 | 7.53E-01 | 1 |
| PCDHA7  | 896676  | 606  | -12 | 2282672 | 747244  | 0 | 13 | 6 | 0 | 43 | 105 | 19890076 | 7.53E-01 | 1 |
| DYSF    | 324429  | 533  | 10  | 5626936 | 1545752 | 0 | 15 | 4 | 0 | 2  | 5   | 2627280  | 7.53E-01 | 1 |
| PDE7B   | 283639  | 392  | 6   | 1208264 | 288004  | 0 | 2  | 1 | 0 | 50 | 57  | 18822432 | 7.53E-01 | 1 |
| SLC4A8  | 527734  | 331  | 43  | 2876480 | 786760  | 0 | 7  | 3 | 0 | 27 | 22  | 10515884 | 7.53E-01 | 1 |
| CRCP    | 501759  | 345  | 35  | 477040  | 117836  | 0 | 1  | 0 | 0 | 50 | 59  | 20074840 | 7.53E-01 | 1 |
| GPX8    | 222731  | 430  | 2   | 534356  | 149164  | 0 | 1  | 0 | 0 | 50 | 56  | 22132164 | 7.53E-01 | 1 |
| GJB2    | 405200  | 472  | 50  | 571380  | 160200  | 0 | 1  | 0 | 0 | 50 | 66  | 25477852 | 7.54E-01 | 1 |
| CDC123  | 328303  | 227  | 34  | 920972  | 211108  | 0 | 2  | 1 | 0 | 50 | 51  | 17923176 | 7.54E-01 | 1 |
| SLC20A2 | 582397  | 459  | 34  | 1628700 | 501960  | 0 | 3  | 2 | 0 | 22 | 17  | 8757244  | 7.54E-01 | 1 |
| GDI1    | 2277674 | NaN  | 40  | 1171240 | 306872  | 0 | 2  | 1 | 0 | 50 | 46  | 20570392 | 7.54E-01 | 1 |
| TSC22D4 | 1479297 | 186  | 60  | 943400  | 338200  | 0 | 2  | 1 | 0 | 50 | 47  | 17722036 | 7.54E-01 | 1 |
| WDR78   | 334231  | 692  | -14 | 2261668 | 592028  | 0 | 8  | 3 | 0 | 50 | 56  | 17878676 | 7.54E-01 | 1 |
| PLAA    | 116221  | 568  | -17 | 2055188 | 553936  | 0 | 3  | 1 | 0 | 50 | 59  | 25347556 | 7.54E-01 | 1 |
| GYS1    | 1927185 | 211  | 43  | 1893920 | 534712  | 0 | 9  | 0 | 0 | 9  | 15  | 4237468  | 7.54E-01 | 1 |
| GRAP    | 652784  | 198  | 21  | 562836  | 154860  | 0 | 1  | 0 | 0 | 50 | 67  | 23515580 | 7.54E-01 | 1 |
| DKC1    | 1739324 | NaN  | 7   | 1353156 | 356712  | 0 | 1  | 0 | 0 | 32 | 49  | 18514492 | 7.54E-01 | 1 |
| OR1L8   | 407749  | 646  | 9   | 760772  | 232468  | 0 | 2  | 1 | 0 | 50 | 67  | 20364980 | 7.54E-01 | 1 |
| ZDHHC9  | 370406  | NaN  | 69  | 943044  | 260592  | 0 | 3  | 2 | 0 | 3  | 2   | 907444   | 7.54E-01 | 1 |
| CHRD    | 1433862 | 268  | 46  | 2380928 | 776080  | 0 | 7  | 2 | 0 | 10 | 15  | 5067660  | 7.54E-01 | 1 |
| DDX53   | 86947   | NaN  | 6   | 1589896 | 437168  | 0 | 2  | 0 | 0 | 4  | 1   | 2064444  | 7.54E-01 | 1 |
| ANKRD29 | 331927  | 138  | 67  | 770740  | 235316  | 0 | 2  | 0 | 0 | 20 | 36  | 11223612 | 7.54E-01 | 1 |
| DAPK3   | 2173603 | 207  | 30  | 1155220 | 334640  | 0 | 2  | 1 | 0 | 38 | 56  | 17113632 | 7.54E-01 | 1 |
| GPR153  | 643428  | 205  | 30  | 1458888 | 512640  | 0 | 3  | 0 | 0 | 10 | 5   | 3474916  | 7.54E-01 | 1 |
| ZDHHC3  | 472994  | 290  | 36  | 1072984 | 275900  | 0 | 2  | 1 | 0 | 46 | 41  | 16711352 | 7.54E-01 | 1 |
| AMN1    | 313930  | 228  | 11  | 670348  | 185120  | 0 | 2  | 2 | 0 | 4  | 4   | 1621224  | 7.54E-01 | 1 |
| RNF169  | 620831  | 160  | 37  | 1747960 | 547172  | 0 | 4  | 2 | 0 | 50 | 46  | 20412328 | 7.54E-01 | 1 |
| CLNS1A  | 603969  | 401  | 30  | 631544  | 158776  | 0 | 1  | 0 | 0 | 50 | 50  | 19753728 | 7.54E-01 | 1 |

|          |         |     |     |         |         |   |    |   |   |    |     |          |          |   |
|----------|---------|-----|-----|---------|---------|---|----|---|---|----|-----|----------|----------|---|
| H1FOO    | 779764  | 210 | 59  | 860096  | 273052  | 0 | 2  | 0 | 0 | 37 | 48  | 15447552 | 7.54E-01 | 1 |
| ADAM18   | 175645  | 764 | 4   | 1979004 | 475260  | 0 | 4  | 1 | 0 | 50 | 59  | 20839172 | 7.54E-01 | 1 |
| ENPP3    | 127852  | 852 | 9   | 2342480 | 568888  | 0 | 3  | 3 | 0 | 50 | 66  | 21455052 | 7.54E-01 | 1 |
| IMP3     | 586224  | 231 | 34  | 443576  | 149164  | 0 | 1  | 1 | 0 | 4  | 3   | 1514780  | 7.54E-01 | 1 |
| SPDYE5   | 785864  | 337 | 70  | 884660  | 228196  | 0 | 2  | 1 | 0 | 30 | 37  | 13235368 | 7.54E-01 | 1 |
| CASP8AP2 | 326497  | 580 | 22  | 5059828 | 1280888 | 0 | 12 | 3 | 0 | 50 | 49  | 25310532 | 7.55E-01 | 1 |
| NEFM     | 182761  | 573 | -2  | 2314000 | 636884  | 0 | 5  | 2 | 0 | 50 | 51  | 19246428 | 7.55E-01 | 1 |
| ST7      | 507440  | 389 | 19  | 1622648 | 423640  | 0 | 6  | 2 | 0 | 50 | 67  | 20723472 | 7.55E-01 | 1 |
| ARL2BP   | 717872  | 149 | 48  | 440372  | 106444  | 0 | 1  | 0 | 0 | 50 | 58  | 17873692 | 7.55E-01 | 1 |
| SLC2A4RC | 1126597 | 202 | 36  | 949808  | 325384  | 0 | 2  | 0 | 0 | 50 | 50  | 18382060 | 7.55E-01 | 1 |
| CYP1B1   | 716797  | 384 | 25  | 1332152 | 418300  | 0 | 2  | 2 | 0 | 20 | 24  | 12974420 | 7.55E-01 | 1 |
| UGT1A10  | NaN     | NaN | NaN | 1347104 | 373444  | 0 | 4  | 2 | 0 | 50 | 118 | 40019028 | 7.55E-01 | 1 |
| PDIA4    | 598458  | 279 | 31  | 1669284 | 438948  | 0 | 2  | 0 | 0 | 50 | 54  | 22068084 | 7.55E-01 | 1 |
| MAML2    | 272830  | 409 | 6   | 2902824 | 821292  | 0 | 6  | 1 | 0 | 50 | 51  | 20287728 | 7.55E-01 | 1 |
| RNF26    | 1054477 | 263 | 40  | 1024924 | 365612  | 0 | 1  | 0 | 0 | 22 | 27  | 8116800  | 7.55E-01 | 1 |
| C8A      | 39104   | 713 | -15 | 1527952 | 389108  | 0 | 5  | 2 | 0 | 43 | 77  | 21766196 | 7.55E-01 | 1 |
| ERF      | 790787  | 299 | 37  | 1322184 | 449628  | 0 | 3  | 1 | 0 | 50 | 73  | 25484972 | 7.55E-01 | 1 |
| PSMD6    | 161890  | 582 | 19  | 1016736 | 264864  | 0 | 2  | 1 | 0 | 50 | 43  | 17827412 | 7.55E-01 | 1 |
| PITX2    | 64585   | 758 | -15 | 977220  | 279816  | 0 | 3  | 1 | 0 | 19 | 28  | 8464612  | 7.55E-01 | 1 |
| SNRNP40  | 643810  | 234 | 30  | 933432  | 254184  | 0 | 2  | 0 | 0 | 38 | 47  | 15273824 | 7.55E-01 | 1 |
| B3GAT2   | 178636  | 733 | 7   | 794592  | 258456  | 0 | 4  | 2 | 0 | 7  | 9   | 2255616  | 7.56E-01 | 1 |
| DUSP19   | 350474  | 524 | 20  | 562480  | 148808  | 0 | 1  | 1 | 0 | 8  | 18  | 3228208  | 7.56E-01 | 1 |
| PSMD7    | 459751  | 433 | -7  | 851908  | 215024  | 0 | 2  | 0 | 0 | 37 | 50  | 16053464 | 7.56E-01 | 1 |
| GNAQ     | 328481  | 671 | -24 | 940552  | 240656  | 0 | 3  | 1 | 0 | 50 | 76  | 20106880 | 7.56E-01 | 1 |
| WDTC1    | 854040  | 162 | 27  | 1751520 | 481668  | 0 | 3  | 2 | 0 | 50 | 55  | 19142832 | 7.56E-01 | 1 |
| NKX2-8   | 49455   | 583 | -20 | 571024  | 202208  | 0 | 1  | 0 | 0 | 50 | 49  | 19936356 | 7.56E-01 | 1 |
| OR8B2    | 149616  | 857 | 0   | 776436  | 228552  | 0 | 5  | 1 | 0 | 2  | 3   | 683164   | 7.56E-01 | 1 |
| RGL1     | 493691  | 597 | 14  | 2097552 | 555360  | 0 | 3  | 3 | 0 | 50 | 66  | 20501684 | 7.56E-01 | 1 |
| PARM1    | 175795  | 775 | 18  | 757212  | 252048  | 0 | 1  | 0 | 0 | 50 | 40  | 20901828 | 7.56E-01 | 1 |
| KLC2     | 2133752 | 236 | 53  | 1597728 | 466716  | 0 | 3  | 1 | 0 | 50 | 77  | 24481764 | 7.56E-01 | 1 |
| AQP7     | 982082  | 163 | 21  | 865080  | 265932  | 0 | 3  | 0 | 0 | 35 | 56  | 13851248 | 7.56E-01 | 1 |
| COL21A1  | 263671  | 483 | -11 | 2477404 | 715916  | 0 | 7  | 0 | 0 | 4  | 1   | 1204348  | 7.56E-01 | 1 |
| DUSP22   | 224772  | 684 | 46  | 498400  | 124244  | 0 | 1  | 0 | 0 | 50 | 42  | 14392368 | 7.57E-01 | 1 |

|          |         |     |     |          |         |   |    |    |   |    |     |          |          |   |
|----------|---------|-----|-----|----------|---------|---|----|----|---|----|-----|----------|----------|---|
| DGKK     | 43036   | NaN | 7   | 3305816  | 888220  | 0 | 11 | 1  | 0 | 13 | 28  | 8623388  | 7.57E-01 | 1 |
| ZNF229   | 725569  | 528 | -49 | 2122472  | 536848  | 0 | 13 | 0  | 0 | 0  | 0   | 536848   | 7.57E-01 | 1 |
| CCNI     | 394078  | 520 | 52  | 969388   | 267356  | 0 | 4  | 0  | 0 | 20 | 28  | 6391624  | 7.57E-01 | 1 |
| LAPTM5   | 348498  | 411 | 35  | 686724   | 187968  | 0 | 2  | 0  | 0 | 50 | 58  | 19503104 | 7.57E-01 | 1 |
| PPP1R12C | 1036976 | 266 | -1  | 1973308  | 627272  | 0 | 2  | 2  | 0 | 48 | 41  | 14115044 | 7.57E-01 | 1 |
| POU5F1B  | NaN     | NaN | NaN | 875760   | 277680  | 0 | 2  | 1  | 0 | 50 | 117 | 39923264 | 7.57E-01 | 1 |
| UBR4     | 787493  | 414 | 33  | 13317248 | 3742984 | 0 | 39 | 13 | 0 | 38 | 46  | 18796800 | 7.57E-01 | 1 |
| PCSK4    | 2352825 | 221 | 38  | 1891784  | 592384  | 0 | 3  | 1  | 0 | 45 | 46  | 17083016 | 7.57E-01 | 1 |
| RWDD3    | 172385  | 582 | -13 | 707728   | 184052  | 0 | 1  | 0  | 0 | 50 | 56  | 23011484 | 7.57E-01 | 1 |
| PGAM2    | 1151124 | 282 | 56  | 643292   | 183340  | 0 | 3  | 1  | 0 | 4  | 8   | 1887868  | 7.57E-01 | 1 |
| OR6B2    | 315906  | 569 | 21  | 759348   | 241368  | 0 | 1  | 0  | 0 | 50 | 47  | 24388136 | 7.57E-01 | 1 |
| DIRAS2   | 94332   | 706 | 13  | 509792   | 135280  | 0 | 1  | 0  | 0 | 50 | 53  | 19803212 | 7.57E-01 | 1 |
| IRGC     | 452493  | 192 | -2  | 1114636  | 378428  | 0 | 2  | 1  | 0 | 50 | 48  | 20632336 | 7.57E-01 | 1 |
| KLHL14   | 213836  | 913 | -12 | 1596304  | 453188  | 0 | 4  | 1  | 0 | 50 | 51  | 18688932 | 7.57E-01 | 1 |
| XPO4     | 413321  | 385 | 42  | 2993604  | 793524  | 0 | 10 | 0  | 0 | 0  | 0   | 793524   | 7.57E-01 | 1 |
| TCAP     | 1284992 | 226 | 38  | 415808   | 128872  | 0 | 1  | 1  | 0 | 36 | 47  | 13340032 | 7.57E-01 | 1 |
| VWCE     | 1124603 | 480 | 43  | 2393032  | 751160  | 0 | 7  | 3  | 0 | 17 | 31  | 11995064 | 7.58E-01 | 1 |
| SYN2     | 330718  | 424 | 21  | 1527596  | 463156  | 0 | 3  | 0  | 0 | 39 | 37  | 18347884 | 7.58E-01 | 1 |
| UBA5     | 210898  | 768 | 21  | 1069068  | 275544  | 0 | 2  | 1  | 0 | 50 | 58  | 22555804 | 7.58E-01 | 1 |
| KDELC2   | 383210  | 579 | 11  | 1304384  | 355288  | 0 | 3  | 0  | 0 | 50 | 50  | 18048488 | 7.58E-01 | 1 |
| DPEP3    | 863919  | 158 | 54  | 1274836  | 414740  | 0 | 5  | 3  | 0 | 2  | 7   | 1254544  | 7.58E-01 | 1 |
| PMPCB    | 375620  | 620 | 8   | 1275904  | 347456  | 0 | 5  | 2  | 0 | 50 | 70  | 20312292 | 7.58E-01 | 1 |
| STC2     | 471196  | 519 | 41  | 767180   | 216448  | 0 | 2  | 1  | 0 | 50 | 79  | 23438684 | 7.58E-01 | 1 |
| MLEC     | 1741363 | 349 | 42  | 736564   | 219296  | 0 | 2  | 1  | 0 | 50 | 64  | 18828840 | 7.58E-01 | 1 |
| SUSD4    | 464408  | 581 | -4  | 1378076  | 392668  | 0 | 2  | 2  | 0 | 50 | 59  | 20933868 | 7.58E-01 | 1 |
| CHRN2    | 1896659 | 403 | 41  | 1253476  | 379496  | 0 | 5  | 4  | 0 | 3  | 6   | 1545396  | 7.58E-01 | 1 |
| PTPRM    | 66398   | 696 | -17 | 3808488  | 1025280 | 0 | 14 | 3  | 0 | 5  | 12  | 4284816  | 7.58E-01 | 1 |
| CDC14B   | 351543  | 349 | 27  | 1362768  | 346032  | 0 | 4  | 1  | 0 | 7  | 8   | 3276980  | 7.58E-01 | 1 |
| GPHN     | 262406  | 846 | 19  | 1992532  | 568532  | 0 | 5  | 2  | 0 | 50 | 50  | 21709236 | 7.58E-01 | 1 |
| GUCY2D   | 1528802 | 272 | 26  | 2704888  | 913496  | 0 | 6  | 1  | 0 | 12 | 8   | 5211484  | 7.58E-01 | 1 |
| KLRC2    | 378365  | 334 | 0   | 614100   | 152724  | 0 | 3  | 3  | 0 | 7  | 5   | 1263088  | 7.58E-01 | 1 |
| NPRL3    | 1005761 | 238 | 36  | 1452836  | 427912  | 0 | 3  | 0  | 0 | 19 | 18  | 7980096  | 7.58E-01 | 1 |
| IRX5     | 100202  | 762 | -46 | 1168036  | 391244  | 0 | 8  | 2  | 0 | 4  | 13  | 2505172  | 7.58E-01 | 1 |

|          |         |      |     |         |         |   |    |   |   |    |     |          |          |   |
|----------|---------|------|-----|---------|---------|---|----|---|---|----|-----|----------|----------|---|
| GPT2     | 482346  | 362  | 12  | 1341052 | 384836  | 0 | 2  | 1 | 0 | 46 | 75  | 22343984 | 7.58E-01 | 1 |
| SLC4A10  | 229857  | 820  | 0   | 2986840 | 802424  | 0 | 6  | 2 | 0 | 50 | 48  | 19273484 | 7.59E-01 | 1 |
| AMZ1     | 767440  | 392  | 30  | 1230692 | 389464  | 0 | 3  | 0 | 0 | 41 | 52  | 17224704 | 7.59E-01 | 1 |
| KLHL15   | 528219  | NaN  | 41  | 1534004 | 412960  | 0 | 5  | 0 | 0 | 10 | 25  | 8236060  | 7.59E-01 | 1 |
| TNFSF13  | 1957426 | 194  | 24  | 642580  | 192596  | 0 | 2  | 1 | 0 | 50 | 81  | 21975524 | 7.59E-01 | 1 |
| DAGLB    | NaN     | NaN  | NaN | 1743332 | 472768  | 0 | 6  | 5 | 0 | 8  | 21  | 4398736  | 7.59E-01 | 1 |
| TMEM131  | 362239  | 708  | 36  | 4852636 | 1354580 | 0 | 17 | 3 | 0 | 13 | 17  | 6528328  | 7.59E-01 | 1 |
| PRRX2    | 702852  | 198  | 42  | 623000  | 203632  | 0 | 1  | 1 | 0 | 50 | 65  | 22678624 | 7.59E-01 | 1 |
| PPFIA4   | 430455  | 453  | 42  | 1795308 | 522252  | 0 | 5  | 0 | 0 | 23 | 30  | 10347496 | 7.59E-01 | 1 |
| FXYD5    | 745516  | 357  | -9  | 469920  | 135636  | 0 | 1  | 1 | 0 | 50 | 54  | 17856960 | 7.59E-01 | 1 |
| GALNT2   | 305688  | 439  | 16  | 1506592 | 392312  | 0 | 4  | 2 | 0 | 50 | 53  | 19925320 | 7.59E-01 | 1 |
| TTL      | 536287  | 433  | 32  | 976864  | 259880  | 0 | 2  | 0 | 0 | 32 | 35  | 13667908 | 7.59E-01 | 1 |
| CLN5     | 213768  | 637  | 24  | 1037028 | 285156  | 0 | 2  | 0 | 0 | 50 | 50  | 20313716 | 7.59E-01 | 1 |
| STAU2    | 261922  | 447  | 16  | 1608764 | 427912  | 0 | 4  | 1 | 0 | 26 | 34  | 12393072 | 7.59E-01 | 1 |
| TTC3     | 351773  | 343  | 47  | 5354240 | 1329304 | 0 | 21 | 3 | 0 | 24 | 25  | 8941652  | 7.59E-01 | 1 |
| OR4S1    | 278638  | 642  | -40 | 763976  | 228196  | 0 | 5  | 2 | 0 | 7  | 18  | 3234972  | 7.60E-01 | 1 |
| DLL3     | 1410725 | 230  | 39  | 1510864 | 512996  | 0 | 4  | 0 | 0 | 16 | 38  | 12814220 | 7.60E-01 | 1 |
| ZNF181   | 932476  | 607  | -52 | 1491996 | 353508  | 0 | 4  | 0 | 0 | 12 | 11  | 4459256  | 7.60E-01 | 1 |
| PNLIPRP3 | 127796  | 855  | -19 | 1237100 | 311500  | 0 | 1  | 1 | 0 | 50 | 67  | 23232204 | 7.60E-01 | 1 |
| KRTAP5-4 | NaN     | NaN  | NaN | 567820  | 168032  | 0 | 1  | 0 | 0 | 50 | 116 | 39813616 | 7.60E-01 | 1 |
| DNPEP    | 604261  | 335  | 38  | 1250628 | 366324  | 0 | 2  | 0 | 0 | 11 | 15  | 4791048  | 7.60E-01 | 1 |
| REG3G    | 21996   | 1408 | -29 | 465292  | 119972  | 0 | 2  | 1 | 0 | 42 | 91  | 16713132 | 7.60E-01 | 1 |
| LRP10    | 1177534 | 225  | 34  | 1723396 | 589892  | 0 | 5  | 3 | 0 | 15 | 22  | 6086176  | 7.60E-01 | 1 |
| ST6GAL2  | 52131   | 1042 | -22 | 1400148 | 412248  | 0 | 4  | 0 | 0 | 6  | 12  | 3313292  | 7.60E-01 | 1 |
| ZNF283   | 464802  | 286  | 11  | 1776440 | 417232  | 0 | 5  | 1 | 0 | 50 | 60  | 22964136 | 7.61E-01 | 1 |
| TSPY2    | 0       | 0    | 0   | 795660  | 217872  | 0 | 1  | 0 | 0 | 50 | 39  | 21173456 | 7.61E-01 | 1 |
| ABHD13   | 71759   | 952  | -32 | 847636  | 239588  | 0 | 4  | 1 | 0 | 50 | 89  | 18161696 | 7.61E-01 | 1 |
| ABHD14B  | 1045639 | 224  | 36  | 517980  | 170880  | 0 | 1  | 0 | 0 | 50 | 51  | 17801068 | 7.61E-01 | 1 |
| EPS8L3   | 933010  | 190  | 27  | 1546108 | 437168  | 0 | 3  | 3 | 0 | 50 | 77  | 22647296 | 7.61E-01 | 1 |
| CYTIP    | 79169   | 895  | 18  | 938772  | 246708  | 0 | 2  | 0 | 0 | 50 | 63  | 22717428 | 7.61E-01 | 1 |
| POLR2E   | 2387949 | 206  | 26  | 557496  | 150588  | 0 | 2  | 1 | 0 | 3  | 10  | 2596664  | 7.61E-01 | 1 |
| ZNF287   | 993246  | 383  | -15 | 1971172 | 487364  | 0 | 4  | 2 | 0 | 50 | 56  | 18211892 | 7.61E-01 | 1 |
| LRFN3    | 984653  | 303  | 21  | 1461380 | 562480  | 0 | 4  | 3 | 0 | 11 | 20  | 5855844  | 7.61E-01 | 1 |



|          |         |      |     |         |         |   |    |   |   |    |    |          |          |   |
|----------|---------|------|-----|---------|---------|---|----|---|---|----|----|----------|----------|---|
| ALPK2    | 204534  | 290  | 67  | 5481688 | 1525460 | 0 | 16 | 1 | 0 | 2  | 2  | 2047000  | 7.61E-01 | 1 |
| AP3S2    | 952242  | 212  | 33  | 508368  | 134568  | 0 | 2  | 2 | 0 | 18 | 34 | 7073720  | 7.61E-01 | 1 |
| ATF6B    | 2170336 | 224  | 32  | 1776440 | 553936  | 0 | 7  | 3 | 0 | 19 | 28 | 8032784  | 7.61E-01 | 1 |
| XKR8     | 891090  | 272  | 20  | 947672  | 331792  | 0 | 2  | 1 | 0 | 50 | 57 | 20821372 | 7.61E-01 | 1 |
| STS      | 61317   | NaN  | 23  | 1493776 | 415808  | 0 | 4  | 1 | 0 | 15 | 16 | 6403728  | 7.61E-01 | 1 |
| ALDOB    | 112947  | 898  | -22 | 938060  | 265576  | 0 | 3  | 2 | 0 | 33 | 48 | 12765092 | 7.61E-01 | 1 |
| WVOX     | 51599   | 1260 | -34 | 1116772 | 311144  | 0 | 4  | 1 | 0 | 14 | 26 | 6687460  | 7.62E-01 | 1 |
| TTC8     | 162049  | 703  | -6  | 1365260 | 349948  | 0 | 2  | 0 | 0 | 21 | 20 | 10724144 | 7.62E-01 | 1 |
| LRRC55   | 925743  | 431  | -21 | 838736  | 261304  | 0 | 2  | 0 | 0 | 35 | 50 | 16577140 | 7.62E-01 | 1 |
| WDR3     | 204177  | 596  | -5  | 2480608 | 655040  | 0 | 7  | 3 | 0 | 50 | 49 | 19709940 | 7.62E-01 | 1 |
| TBC1D2   | 490665  | 254  | 52  | 2309728 | 682808  | 0 | 5  | 2 | 0 | 50 | 37 | 17178424 | 7.62E-01 | 1 |
| RAB3C    | 142186  | 420  | 9   | 603420  | 146316  | 0 | 1  | 0 | 0 | 50 | 49 | 19883312 | 7.62E-01 | 1 |
| MPRSS11  | 210733  | 767  | 22  | 1083308 | 299752  | 0 | 1  | 2 | 0 | 28 | 33 | 10325780 | 7.62E-01 | 1 |
| RPL8     | 1454261 | 384  | 20  | 645428  | 204700  | 0 | 2  | 0 | 0 | 50 | 96 | 23337580 | 7.62E-01 | 1 |
| THNSL1   | 157790  | 417  | -10 | 1873272 | 514776  | 0 | 3  | 1 | 0 | 50 | 52 | 22882612 | 7.62E-01 | 1 |
| SRCIN1   | 1028227 | 232  | 33  | 2915284 | 955148  | 0 | 6  | 1 | 0 | 18 | 20 | 9455004  | 7.62E-01 | 1 |
| CXorf21  | 81961   | NaN  | 21  | 767536  | 203276  | 0 | 1  | 1 | 0 | 43 | 51 | 19043152 | 7.62E-01 | 1 |
| CLLU1    | NaN     | NaN  | NaN | 312924  | 77964   | 0 | 1  | 1 | 0 | 8  | 17 | 4003932  | 7.62E-01 | 1 |
| TAF8     | 490949  | 186  | 35  | 803136  | 229620  | 0 | 2  | 1 | 0 | 50 | 63 | 19697836 | 7.63E-01 | 1 |
| TMEM95   | 1911735 | 206  | 36  | 482380  | 138128  | 0 | 1  | 0 | 0 | 50 | 69 | 22072000 | 7.63E-01 | 1 |
| ZNF324B  | 2179183 | 270  | -4  | 1347104 | 411892  | 0 | 4  | 1 | 0 | 50 | 76 | 25634848 | 7.63E-01 | 1 |
| C14orf79 | 854493  | 205  | 30  | 824140  | 237452  | 0 | 2  | 1 | 0 | 50 | 86 | 25553680 | 7.63E-01 | 1 |
| ANP32B   | 466644  | 269  | 42  | 679960  | 153080  | 0 | 2  | 0 | 0 | 20 | 30 | 8142432  | 7.63E-01 | 1 |
| BVES     | 108905  | 702  | -1  | 945180  | 241368  | 0 | 1  | 2 | 0 | 16 | 18 | 5289448  | 7.63E-01 | 1 |
| CPN1     | 1067171 | 188  | 51  | 1179428 | 325384  | 0 | 4  | 1 | 0 | 50 | 72 | 19313356 | 7.63E-01 | 1 |
| ADD3     | 349258  | 424  | 3   | 1833044 | 491992  | 0 | 4  | 2 | 0 | 50 | 54 | 21183780 | 7.63E-01 | 1 |
| OR5A2    | 417582  | 672  | -4  | 801356  | 237808  | 0 | 2  | 2 | 0 | 35 | 51 | 14743384 | 7.63E-01 | 1 |
| ZZEF1    | 717943  | 314  | 23  | 7611636 | 2111436 | 0 | 22 | 8 | 0 | 7  | 21 | 7787144  | 7.63E-01 | 1 |
| IAA0895I | 1109491 | 150  | 46  | 1168036 | 369884  | 0 | 1  | 0 | 0 | 6  | 2  | 3107880  | 7.63E-01 | 1 |
| CBX1     | 1205950 | 255  | 20  | 493060  | 119972  | 0 | 1  | 0 | 0 | 50 | 81 | 26318368 | 7.63E-01 | 1 |
| ST8SIA5  | 292667  | 608  | 15  | 970456  | 263084  | 0 | 2  | 2 | 0 | 11 | 13 | 5594184  | 7.63E-01 | 1 |
| TOMM20   | 583355  | 168  | 26  | 385192  | 99680   | 0 | 3  | 1 | 0 | 1  | 2  | 393736   | 7.63E-01 | 1 |
| SIRPA    | 467799  | 486  | 41  | 1271276 | 380920  | 0 | 3  | 3 | 0 | 26 | 34 | 12097948 | 7.63E-01 | 1 |

|          |         |      |     |         |        |   |    |   |   |    |    |          |          |   |
|----------|---------|------|-----|---------|--------|---|----|---|---|----|----|----------|----------|---|
| GFAP     | 1101543 | 172  | 28  | 1202568 | 356712 | 0 | 5  | 2 | 0 | 50 | 74 | 17295192 | 7.63E-01 | 1 |
| STAMBPL1 | 175317  | 289  | 20  | 1150948 | 291920 | 0 | 2  | 1 | 0 | 50 | 42 | 18559704 | 7.63E-01 | 1 |
| KIAA1024 | 261814  | 789  | 13  | 2317204 | 633680 | 0 | 6  | 2 | 0 | 29 | 39 | 12143872 | 7.64E-01 | 1 |
| APP      | 529745  | 793  | -13 | 2019944 | 522964 | 0 | 6  | 3 | 0 | 50 | 56 | 17547952 | 7.64E-01 | 1 |
| ULK4     | 310078  | 648  | 15  | 3333940 | 908156 | 0 | 11 | 2 | 0 | 15 | 18 | 7245312  | 7.64E-01 | 1 |
| PPP2CA   | 838413  | 147  | 48  | 801712  | 217160 | 0 | 2  | 1 | 0 | 50 | 76 | 23078412 | 7.64E-01 | 1 |
| RNF13    | 536427  | 340  | 14  | 1005344 | 257032 | 0 | 4  | 0 | 0 | 19 | 34 | 9718088  | 7.64E-01 | 1 |
| ZNF674   | 420626  | NaN  | 33  | 1521188 | 360628 | 0 | 3  | 0 | 0 | 50 | 42 | 17867284 | 7.64E-01 | 1 |
| FGF4     | 465152  | 561  | 38  | 501248  | 170524 | 0 | 1  | 0 | 0 | 50 | 60 | 20189828 | 7.64E-01 | 1 |
| CDKN2D   | 2036812 | 226  | 23  | 402636  | 140976 | 0 | 1  | 0 | 0 | 50 | 81 | 22329032 | 7.64E-01 | 1 |
| RUNX3    | 566264  | 443  | 27  | 1077612 | 336420 | 0 | 2  | 1 | 0 | 50 | 54 | 20654408 | 7.64E-01 | 1 |
| ARPP21   | 3796    | 1075 | -21 | 2126744 | 566752 | 0 | 6  | 1 | 0 | 2  | 1  | 1104668  | 7.64E-01 | 1 |
| CADPS    | 76552   | 1010 | 3   | 3594888 | 945180 | 0 | 15 | 3 | 0 | 50 | 61 | 19617024 | 7.64E-01 | 1 |
| PSEN2    | 428197  | 373  | 1   | 1150592 | 330724 | 0 | 2  | 2 | 0 | 50 | 42 | 17764044 | 7.65E-01 | 1 |
| SFTPC    | 587455  | 196  | 50  | 504808  | 155216 | 0 | 1  | 0 | 0 | 50 | 67 | 20087300 | 7.65E-01 | 1 |
| GADL1    | 78546   | 487  | -12 | 1393028 | 341404 | 0 | 3  | 0 | 0 | 29 | 47 | 18704952 | 7.65E-01 | 1 |
| CHKA     | 1168866 | 251  | 63  | 1197584 | 316840 | 0 | 2  | 0 | 0 | 50 | 71 | 20685736 | 7.65E-01 | 1 |
| TAS1R3   | 1744013 | 273  | 28  | 2071564 | 681740 | 0 | 9  | 5 | 0 | 17 | 31 | 7122136  | 7.65E-01 | 1 |
| TNFAIP8  | 305890  | 296  | 55  | 520116  | 126024 | 0 | 1  | 0 | 0 | 50 | 51 | 17665788 | 7.65E-01 | 1 |
| SMYD4    | 1458897 | 153  | 26  | 2044864 | 577076 | 0 | 6  | 2 | 0 | 50 | 63 | 21449712 | 7.65E-01 | 1 |
| GRIK3    | 361850  | 626  | 30  | 2347108 | 664652 | 0 | 11 | 5 | 0 | 3  | 10 | 2124608  | 7.65E-01 | 1 |
| ACSF3    | 1277584 | 239  | 40  | 1440020 | 447136 | 0 | 4  | 1 | 0 | 50 | 67 | 22562212 | 7.65E-01 | 1 |
| VPS37A   | 251352  | 387  | 6   | 1050200 | 269848 | 0 | 2  | 0 | 0 | 50 | 43 | 17427268 | 7.65E-01 | 1 |
| VGF      | 1022626 | 258  | 39  | 1476332 | 501604 | 0 | 5  | 2 | 0 | 50 | 67 | 19705312 | 7.65E-01 | 1 |
| TMEM81   | 655446  | 431  | 37  | 630120  | 190104 | 0 | 1  | 0 | 0 | 50 | 47 | 19772952 | 7.65E-01 | 1 |
| APLN     | 929334  | 250  | -20 | 936992  | 283732 | 0 | 3  | 2 | 0 | 50 | 75 | 20906100 | 7.65E-01 | 1 |
| CHRNA3   | 603002  | 507  | 32  | 1167324 | 324672 | 0 | 4  | 2 | 0 | 45 | 82 | 22015040 | 7.65E-01 | 1 |
| SNAPC1   | 246220  | 410  | 26  | 990036  | 230688 | 0 | 2  | 2 | 0 | 33 | 35 | 12608452 | 7.65E-01 | 1 |
| OMA1     | 301227  | 564  | -3  | 1362056 | 354220 | 0 | 3  | 0 | 0 | 2  | 0  | 869352   | 7.65E-01 | 1 |
| KAL1     | 16107   | NaN  | -30 | 1738348 | 499112 | 0 | 7  | 0 | 0 | 0  | 0  | 499112   | 7.65E-01 | 1 |
| IL1RN    | 672307  | 479  | 25  | 535068  | 134568 | 0 | 1  | 0 | 0 | 50 | 59 | 20875128 | 7.65E-01 | 1 |
| RBM4B    | 1432488 | 187  | 46  | 901748  | 264508 | 0 | 2  | 1 | 0 | 31 | 42 | 14892904 | 7.65E-01 | 1 |
| PPP2CB   | 365415  | 346  | 28  | 801712  | 217160 | 0 | 1  | 0 | 0 | 50 | 42 | 21823156 | 7.65E-01 | 1 |

|           |         |     |     |         |         |   |    |   |   |    |    |          |          |   |
|-----------|---------|-----|-----|---------|---------|---|----|---|---|----|----|----------|----------|---|
| LIN7A     | 27634   | 987 | -4  | 595588  | 173372  | 0 | 2  | 0 | 0 | 50 | 80 | 17902172 | 7.65E-01 | 1 |
| LRRC40    | 297942  | 492 | -14 | 1567468 | 424352  | 0 | 3  | 2 | 0 | 50 | 65 | 18887224 | 7.65E-01 | 1 |
| PLK3      | 574317  | 191 | 43  | 1627632 | 507300  | 0 | 9  | 4 | 0 | 6  | 14 | 2995384  | 7.65E-01 | 1 |
| ZNF362    | 726025  | 413 | 29  | 1061948 | 321112  | 0 | 2  | 1 | 0 | 50 | 50 | 19681104 | 7.65E-01 | 1 |
| PPIH      | 650376  | 461 | 21  | 490212  | 120684  | 0 | 1  | 0 | 0 | 50 | 60 | 20231480 | 7.66E-01 | 1 |
| HECW1     | 496063  | 617 | 13  | 4121056 | 1147388 | 0 | 14 | 5 | 0 | 50 | 58 | 18687508 | 7.66E-01 | 1 |
| COLQ      | 507200  | 256 | 40  | 1245644 | 367036  | 0 | 3  | 0 | 0 | 2  | 0  | 794236   | 7.66E-01 | 1 |
| EFNA2     | 2214581 | 234 | 29  | 533288  | 165184  | 0 | 1  | 0 | 0 | 50 | 68 | 20485664 | 7.66E-01 | 1 |
| IFNA17    | 193208  | 498 | -3  | 478820  | 132076  | 0 | 1  | 1 | 0 | 50 | 58 | 18347172 | 7.66E-01 | 1 |
| PSMD8     | 1467279 | 253 | 0   | 887508  | 264864  | 0 | 2  | 1 | 0 | 50 | 59 | 19987620 | 7.66E-01 | 1 |
| GALNT11   | 286605  | 586 | 15  | 1574232 | 423996  | 0 | 4  | 2 | 0 | 24 | 48 | 12212580 | 7.66E-01 | 1 |
| EDNRA     | 71235   | 430 | -6  | 1114636 | 286580  | 0 | 3  | 2 | 0 | 50 | 52 | 20317988 | 7.66E-01 | 1 |
| RPS6KB1   | 959758  | 216 | 20  | 1383060 | 363120  | 0 | 3  | 1 | 0 | 22 | 18 | 7908896  | 7.66E-01 | 1 |
| FRMD7     | 151115  | NaN | 25  | 1857608 | 480244  | 0 | 3  | 1 | 0 | 45 | 29 | 15288776 | 7.66E-01 | 1 |
| MAS1      | 653091  | 460 | 26  | 805984  | 240656  | 0 | 2  | 2 | 0 | 17 | 18 | 5741568  | 7.66E-01 | 1 |
| CELA3A    | 448600  | 190 | 29  | 704168  | 198292  | 0 | 2  | 2 | 0 | 19 | 30 | 8333248  | 7.66E-01 | 1 |
| MYLK2     | 1015946 | 241 | 37  | 1536496 | 427556  | 0 | 5  | 3 | 0 | 16 | 18 | 6273076  | 7.66E-01 | 1 |
| NDUFB9    | 456351  | 544 | 44  | 476328  | 119616  | 0 | 1  | 1 | 0 | 50 | 66 | 20641948 | 7.66E-01 | 1 |
| MATN1     | 286775  | 493 | 27  | 1250984 | 373444  | 0 | 3  | 0 | 0 | 48 | 43 | 17380276 | 7.67E-01 | 1 |
| TELO2     | 1254229 | 256 | 34  | 2084380 | 686012  | 0 | 6  | 1 | 0 | 16 | 22 | 6593476  | 7.67E-01 | 1 |
| GDE1      | 349996  | 491 | 21  | 851908  | 233180  | 0 | 2  | 1 | 0 | 36 | 51 | 16404124 | 7.67E-01 | 1 |
| RAD52     | 473725  | 289 | 44  | 1094344 | 295124  | 0 | 2  | 0 | 0 | 14 | 19 | 8476004  | 7.67E-01 | 1 |
| RGS17     | 158803  | 677 | 1   | 558208  | 134924  | 0 | 1  | 0 | 0 | 50 | 55 | 21110444 | 7.67E-01 | 1 |
| PTGS1     | 343200  | 635 | 27  | 1541480 | 423640  | 0 | 2  | 0 | 0 | 29 | 28 | 16671836 | 7.67E-01 | 1 |
| CPZ       | 92046   | 471 | 35  | 1653976 | 485228  | 0 | 3  | 1 | 0 | 39 | 58 | 18034960 | 7.67E-01 | 1 |
| A2ML1     | 300254  | 407 | 12  | 3773600 | 1038808 | 0 | 11 | 5 | 0 | 45 | 62 | 22152812 | 7.67E-01 | 1 |
| MAGEC3    | 17504   | NaN | -11 | 1957644 | 528660  | 0 | 7  | 1 | 0 | 3  | 12 | 2826996  | 7.67E-01 | 1 |
| PHKB      | 320760  | 885 | -3  | 3011404 | 790676  | 0 | 7  | 2 | 0 | 50 | 62 | 18921756 | 7.67E-01 | 1 |
| ALDH1A2   | 187239  | 674 | -1  | 1348172 | 370240  | 0 | 5  | 3 | 0 | 11 | 17 | 3843732  | 7.67E-01 | 1 |
| SECISBP2I | 372654  | 382 | 9   | 2731588 | 723392  | 0 | 7  | 1 | 0 | 50 | 60 | 26255000 | 7.67E-01 | 1 |
| RNGTT     | 202476  | 672 | 37  | 1589540 | 390532  | 0 | 3  | 0 | 0 | 8  | 11 | 3992896  | 7.67E-01 | 1 |
| RBBP8     | 254087  | 158 | 40  | 2432904 | 528660  | 0 | 8  | 3 | 0 | 17 | 26 | 6631924  | 7.67E-01 | 1 |
| TBPL2     | 729264  | 159 | 37  | 955148  | 275188  | 0 | 1  | 0 | 0 | 15 | 19 | 5697068  | 7.67E-01 | 1 |

|          |         |      |     |         |         |   |    |   |   |    |     |          |          |   |
|----------|---------|------|-----|---------|---------|---|----|---|---|----|-----|----------|----------|---|
| KRT79    | 1781225 | 288  | 27  | 1350308 | 403348  | 0 | 5  | 2 | 0 | 13 | 20  | 5681404  | 7.67E-01 | 1 |
| TPST1    | 551438  | 412  | 26  | 944112  | 264864  | 0 | 2  | 0 | 0 | 50 | 59  | 21400584 | 7.67E-01 | 1 |
| ALDH1A1  | 344512  | 542  | 1   | 1306876 | 354932  | 0 | 4  | 2 | 0 | 50 | 83  | 24697500 | 7.67E-01 | 1 |
| C12orf65 | 1014179 | 201  | 29  | 424352  | 119260  | 0 | 1  | 0 | 0 | 50 | 76  | 21287376 | 7.67E-01 | 1 |
| ACSS1    | 572146  | 563  | -18 | 1749384 | 516912  | 0 | 4  | 1 | 0 | 25 | 35  | 10964088 | 7.67E-01 | 1 |
| ABHD1    | 1214097 | 238  | 50  | 1025636 | 313636  | 0 | 2  | 1 | 0 | 50 | 60  | 22743060 | 7.67E-01 | 1 |
| CDK4     | 1160849 | 344  | 39  | 765400  | 238520  | 0 | 2  | 2 | 0 | 10 | 12  | 4058400  | 7.68E-01 | 1 |
| NOC2L    | 1851188 | 467  | 3   | 1935572 | 546460  | 0 | 6  | 2 | 0 | 50 | 77  | 24957380 | 7.68E-01 | 1 |
| CCNJ     | 518423  | 857  | 35  | 980068  | 271628  | 0 | 1  | 0 | 0 | 50 | 26  | 17177712 | 7.68E-01 | 1 |
| ATP1A3   | 1150724 | 438  | 33  | 2597376 | 745464  | 0 | 8  | 5 | 0 | 37 | 48  | 14815652 | 7.68E-01 | 1 |
| SLC39A6  | 365879  | 399  | 35  | 1959424 | 514064  | 0 | 4  | 1 | 0 | 38 | 39  | 16349656 | 7.68E-01 | 1 |
| DLX6     | 99426   | 991  | -15 | 746888  | 203632  | 0 | 1  | 0 | 0 | 50 | 65  | 20345400 | 7.68E-01 | 1 |
| HPCA     | 1019374 | 232  | 15  | 508012  | 126380  | 0 | 1  | 0 | 0 | 24 | 29  | 8401244  | 7.68E-01 | 1 |
| SLC22A1  | 653494  | 449  | 3   | 1431120 | 389820  | 0 | 2  | 2 | 0 | 50 | 45  | 16706368 | 7.68E-01 | 1 |
| RIPK3    | 897133  | 265  | 40  | 1319336 | 381988  | 0 | 4  | 2 | 0 | 5  | 12  | 4197596  | 7.68E-01 | 1 |
| HSH2D    | 761374  | 298  | 42  | 881812  | 270560  | 0 | 2  | 0 | 0 | 50 | 57  | 18801428 | 7.68E-01 | 1 |
| GATA3    | 182932  | 675  | -2  | 1104312 | 338556  | 0 | 6  | 4 | 0 | 3  | 6   | 894628   | 7.68E-01 | 1 |
| ZNF91    | 410897  | 1524 | -57 | 3074772 | 757212  | 0 | 18 | 3 | 0 | 17 | 38  | 8115732  | 7.69E-01 | 1 |
| SLC38A8  | 494952  | 460  | 3   | 1086868 | 348524  | 0 | 2  | 3 | 0 | 12 | 9   | 4469224  | 7.69E-01 | 1 |
| SLC30A2  | 748547  | 221  | 31  | 949096  | 275900  | 0 | 2  | 0 | 0 | 37 | 34  | 12359964 | 7.69E-01 | 1 |
| TBX10    | 1391063 | 393  | 56  | 967964  | 300820  | 0 | 1  | 2 | 0 | 18 | 26  | 7431856  | 7.69E-01 | 1 |
| MMP8     | 530224  | 567  | -10 | 1230336 | 309720  | 0 | 3  | 1 | 0 | 50 | 50  | 17183764 | 7.69E-01 | 1 |
| OR2A14   | 221024  | 812  | -11 | 760060  | 235316  | 0 | 2  | 1 | 0 | 50 | 70  | 20067720 | 7.69E-01 | 1 |
| ANKRD13I | 1369264 | 177  | 44  | 1545752 | 455680  | 0 | 5  | 1 | 0 | 44 | 60  | 18796088 | 7.69E-01 | 1 |
| MYO5C    | 534690  | 195  | 24  | 4625508 | 1129944 | 0 | 11 | 4 | 0 | 43 | 61  | 18228624 | 7.69E-01 | 1 |
| MKRN2    | 351796  | 280  | 34  | 1092920 | 275188  | 0 | 2  | 1 | 0 | 50 | 50  | 19374944 | 7.69E-01 | 1 |
| NLRP13   | 802494  | 561  | -68 | 2680680 | 707016  | 0 | 7  | 5 | 0 | 50 | 113 | 28863056 | 7.69E-01 | 1 |
| VEGFB    | 1613996 | 257  | 65  | 525456  | 168744  | 0 | 1  | 0 | 0 | 50 | 66  | 21324400 | 7.69E-01 | 1 |
| LRRC48   | 971820  | 193  | 20  | 1431120 | 352440  | 0 | 2  | 0 | 0 | 6  | 3   | 2823792  | 7.69E-01 | 1 |
| PNPLA8   | 366326  | 803  | -6  | 2017096 | 530084  | 0 | 3  | 1 | 0 | 33 | 39  | 14597780 | 7.69E-01 | 1 |
| SAMD4B   | 1748498 | 252  | 32  | 1739416 | 534356  | 0 | 7  | 3 | 0 | 7  | 16  | 3674988  | 7.69E-01 | 1 |
| CATSPER4 | 896535  | 217  | 30  | 1222148 | 330724  | 0 | 3  | 1 | 0 | 50 | 84  | 26408792 | 7.69E-01 | 1 |
| ARL13A   | 414180  | NaN  | 45  | 788540  | 208972  | 0 | 2  | 1 | 0 | 50 | 53  | 16106508 | 7.69E-01 | 1 |

|           |         |     |     |         |         |   |    |   |   |    |     |          |          |   |
|-----------|---------|-----|-----|---------|---------|---|----|---|---|----|-----|----------|----------|---|
| GAS2      | 52076   | 981 | 1   | 820580  | 217516  | 0 | 3  | 0 | 0 | 50 | 67  | 19149596 | 7.69E-01 | 1 |
| KLRG2     | 568414  | 428 | 26  | 998580  | 334284  | 0 | 2  | 1 | 0 | 50 | 59  | 22632344 | 7.69E-01 | 1 |
| AURKB     | 870950  | 218 | 18  | 886796  | 252760  | 0 | 2  | 1 | 0 | 50 | 57  | 18595660 | 7.70E-01 | 1 |
| CYR61     | 296507  | 345 | 13  | 973304  | 267712  | 0 | 5  | 2 | 0 | 9  | 13  | 3181216  | 7.70E-01 | 1 |
| SLC6A12   | 321580  | 557 | 28  | 1586692 | 443576  | 0 | 6  | 0 | 0 | 18 | 32  | 8257776  | 7.70E-01 | 1 |
| ANLN      | 332583  | 329 | 21  | 2992892 | 808120  | 0 | 10 | 0 | 0 | 1  | 2   | 1241016  | 7.70E-01 | 1 |
| NDUFA13   | 868278  | 284 | 7   | 383412  | 102528  | 0 | 1  | 0 | 0 | 50 | 74  | 19156360 | 7.70E-01 | 1 |
| XIAP      | 337935  | NaN | 14  | 1294416 | 326808  | 0 | 3  | 1 | 0 | 50 | 59  | 21683248 | 7.70E-01 | 1 |
| GGA1      | 1136064 | 180 | 65  | 1694204 | 493060  | 0 | 5  | 0 | 0 | 14 | 11  | 4469224  | 7.70E-01 | 1 |
| FZR1      | 2160126 | 269 | 39  | 1269496 | 378428  | 0 | 3  | 1 | 0 | 50 | 60  | 21798948 | 7.70E-01 | 1 |
| AGAP6     | NaN     | NaN | NaN | 1747604 | 483448  | 0 | 5  | 0 | 0 | 50 | 116 | 40129032 | 7.70E-01 | 1 |
| DTL       | 452008  | 399 | 15  | 1885376 | 516556  | 0 | 3  | 0 | 0 | 10 | 6   | 3378440  | 7.70E-01 | 1 |
| ACTR3     | 402980  | 629 | 15  | 1101108 | 288360  | 0 | 2  | 0 | 0 | 50 | 51  | 21246080 | 7.70E-01 | 1 |
| TBCC      | 960153  | 187 | 36  | 854400  | 259524  | 0 | 2  | 1 | 0 | 50 | 76  | 23812128 | 7.70E-01 | 1 |
| KRT6A     | 1194800 | 389 | 29  | 1419372 | 425064  | 0 | 4  | 2 | 0 | 50 | 64  | 18116128 | 7.70E-01 | 1 |
| FGD3      | 478130  | 463 | 43  | 1859388 | 535068  | 0 | 3  | 1 | 0 | 26 | 31  | 11908200 | 7.70E-01 | 1 |
| KRTAP10-1 | 860604  | 461 | 30  | 547884  | 167676  | 0 | 1  | 1 | 0 | 50 | 62  | 22093360 | 7.70E-01 | 1 |
| GTF2IRD1  | 896611  | 194 | 52  | 2474912 | 712000  | 0 | 7  | 2 | 0 | 49 | 53  | 18848064 | 7.70E-01 | 1 |
| FMO5      | NaN     | NaN | NaN | 1504812 | 390888  | 0 | 4  | 1 | 0 | 50 | 117 | 40036472 | 7.70E-01 | 1 |
| MMP17     | 364888  | 206 | 17  | 1502320 | 473480  | 0 | 3  | 1 | 0 | 50 | 45  | 20819236 | 7.70E-01 | 1 |
| MIS12     | 1145030 | 544 | 24  | 534000  | 130296  | 0 | 1  | 0 | 0 | 50 | 77  | 22011836 | 7.71E-01 | 1 |
| WDFY3     | 92480   | 950 | -1  | 9118228 | 2503748 | 0 | 31 | 6 | 0 | 10 | 17  | 5964780  | 7.71E-01 | 1 |
| C7orf25   | 163131  | 744 | -6  | 1189396 | 354932  | 0 | 2  | 1 | 0 | 50 | 42  | 19437244 | 7.71E-01 | 1 |
| KIF27     | 464240  | 285 | 5   | 3629064 | 935568  | 0 | 10 | 3 | 0 | 50 | 67  | 24803944 | 7.71E-01 | 1 |
| TCEA3     | 1050778 | 163 | 27  | 922396  | 238520  | 0 | 4  | 1 | 0 | 50 | 94  | 20813184 | 7.71E-01 | 1 |
| PAPD5     | 294222  | 418 | 24  | 1788188 | 504808  | 0 | 4  | 1 | 0 | 13 | 10  | 4828428  | 7.71E-01 | 1 |
| FKBP4     | 495532  | 443 | 28  | 1197940 | 314348  | 0 | 5  | 0 | 0 | 11 | 20  | 7171976  | 7.71E-01 | 1 |
| KRTAP4-5  | 996799  | 468 | -7  | 465648  | 119616  | 0 | 1  | 0 | 0 | 50 | 60  | 17141400 | 7.71E-01 | 1 |
| THBS4     | 354204  | 746 | 36  | 2504816 | 667144  | 0 | 4  | 2 | 0 | 50 | 46  | 18418372 | 7.71E-01 | 1 |
| PRRT3     | 950574  | 170 | 54  | 2302608 | 856536  | 0 | 7  | 3 | 0 | 39 | 56  | 16713132 | 7.71E-01 | 1 |
| IFNA14    | 193208  | 498 | -3  | 488788  | 122108  | 0 | 1  | 1 | 0 | 36 | 47  | 13510556 | 7.71E-01 | 1 |
| MFN1      | 408187  | 600 | 11  | 1947320 | 502672  | 0 | 6  | 3 | 0 | 50 | 74  | 21239672 | 7.71E-01 | 1 |
| HAPLN4    | 940952  | 232 | 17  | 974372  | 336064  | 0 | 2  | 1 | 0 | 41 | 56  | 18509864 | 7.71E-01 | 1 |

|          |         |      |     |         |         |   |    |   |   |    |     |          |          |   |
|----------|---------|------|-----|---------|---------|---|----|---|---|----|-----|----------|----------|---|
| ZNF574   | 886688  | 438  | 31  | 2158072 | 720188  | 0 | 8  | 1 | 0 | 0  | 1   | 720188   | 7.71E-01 | 1 |
| VPS26A   | 749325  | 145  | 48  | 880744  | 204344  | 0 | 3  | 0 | 0 | 50 | 53  | 17331148 | 7.71E-01 | 1 |
| OR8J3    | 10101   | 1007 | -38 | 772164  | 238164  | 0 | 6  | 2 | 0 | 3  | 5   | 1002140  | 7.71E-01 | 1 |
| ED7-TICA | 359255  | 611  | 45  | 600572  | 172660  | 0 | 1  | 0 | 0 | 50 | 51  | 18890428 | 7.71E-01 | 1 |
| SLC30A7  | 173324  | 727  | -4  | 993240  | 261660  | 0 | 3  | 2 | 0 | 35 | 36  | 12140312 | 7.71E-01 | 1 |
| OTUB2    | 200224  | 560  | 38  | 613032  | 161268  | 0 | 1  | 0 | 0 | 50 | 46  | 19261024 | 7.71E-01 | 1 |
| PDLIM5   | 137154  | 349  | 18  | 1660740 | 472056  | 0 | 4  | 3 | 0 | 7  | 7   | 2069428  | 7.71E-01 | 1 |
| IRF2BP2  | 503819  | 149  | 31  | 1412252 | 478108  | 0 | 4  | 1 | 0 | 50 | 65  | 20660104 | 7.71E-01 | 1 |
| C1orf94  | 28616   | 907  | 16  | 1497336 | 447492  | 0 | 4  | 0 | 0 | 50 | 71  | 23319068 | 7.71E-01 | 1 |
| TGM1     | 915114  | 220  | 38  | 2066936 | 613744  | 0 | 7  | 2 | 0 | 50 | 69  | 21077692 | 7.72E-01 | 1 |
| MXRA8    | 1744013 | 273  | 28  | 1111432 | 348524  | 0 | 2  | 1 | 0 | 9  | 14  | 4108596  | 7.72E-01 | 1 |
| PHYHIPL  | 115861  | 812  | -3  | 1006056 | 250980  | 0 | 3  | 0 | 0 | 9  | 12  | 3962636  | 7.72E-01 | 1 |
| SNAPC3   | 201198  | 650  | 5   | 1075476 | 280884  | 0 | 2  | 0 | 0 | 50 | 50  | 20204068 | 7.72E-01 | 1 |
| LITAF    | 649939  | 209  | 30  | 480956  | 144892  | 0 | 1  | 0 | 0 | 50 | 53  | 16597076 | 7.72E-01 | 1 |
| EFCAB1   | 16699   | 533  | -28 | 573160  | 131720  | 0 | 4  | 2 | 0 | 8  | 14  | 1998228  | 7.72E-01 | 1 |
| NEK4     | 1205825 | 272  | 48  | 2165548 | 596300  | 0 | 4  | 1 | 0 | 25 | 21  | 10678220 | 7.72E-01 | 1 |
| LZIC     | 757819  | 183  | 29  | 512996  | 124600  | 0 | 1  | 0 | 0 | 50 | 66  | 22774032 | 7.72E-01 | 1 |
| SCP2     | 609222  | 386  | 23  | 1481316 | 362052  | 0 | 3  | 1 | 0 | 50 | 66  | 25149976 | 7.72E-01 | 1 |
| NCK2     | 209853  | 689  | 15  | 968320  | 265220  | 0 | 3  | 3 | 0 | 5  | 7   | 2430768  | 7.72E-01 | 1 |
| TXNL1    | 82448   | 867  | 15  | 770028  | 189036  | 0 | 2  | 1 | 0 | 50 | 61  | 18446496 | 7.72E-01 | 1 |
| LDHB     | 502803  | 826  | -13 | 871132  | 232112  | 0 | 2  | 0 | 0 | 50 | 58  | 17456104 | 7.72E-01 | 1 |
| C7orf57  | 127890  | 364  | 24  | 774300  | 207192  | 0 | 2  | 2 | 0 | 2  | 3   | 1002140  | 7.72E-01 | 1 |
| PCID2    | 759371  | 229  | 38  | 1080460 | 263084  | 0 | 3  | 1 | 0 | 47 | 50  | 18676472 | 7.72E-01 | 1 |
| NUMA1    | 747702  | 311  | 59  | 5328608 | 1557856 | 0 | 11 | 7 | 0 | 39 | 29  | 12526572 | 7.72E-01 | 1 |
| FBXO33   | 314889  | 405  | 13  | 1365260 | 428980  | 0 | 2  | 0 | 0 | 7  | 9   | 3582428  | 7.72E-01 | 1 |
| C17orf62 | 2583801 | 179  | 20  | 492348  | 135636  | 0 | 2  | 1 | 0 | 2  | 1   | 614812   | 7.72E-01 | 1 |
| OBP2B    | 1875784 | 397  | 51  | 458172  | 116412  | 0 | 1  | 0 | 0 | 50 | 62  | 18361056 | 7.72E-01 | 1 |
| PTRH2    | 1084897 | 398  | 21  | 446780  | 132076  | 0 | 1  | 0 | 0 | 50 | 68  | 19817452 | 7.72E-01 | 1 |
| SYN3     | 259538  | 520  | -72 | 1485944 | 426844  | 0 | 6  | 1 | 0 | 15 | 17  | 4919920  | 7.73E-01 | 1 |
| HMBS     | 1390854 | 195  | 58  | 943756  | 271628  | 0 | 1  | 0 | 0 | 1  | 0   | 845144   | 7.73E-01 | 1 |
| POU6F1   | 496692  | 176  | 40  | 754364  | 234604  | 0 | 2  | 0 | 0 | 50 | 57  | 17262440 | 7.73E-01 | 1 |
| CXCL11   | 489826  | 399  | 43  | 256320  | 63012   | 0 | 1  | 1 | 0 | 5  | 4   | 867572   | 7.73E-01 | 1 |
| LDHAL6B  | NaN     | NaN  | NaN | 952300  | 273764  | 0 | 2  | 2 | 0 | 50 | 118 | 39919348 | 7.73E-01 | 1 |

|          |         |      |     |         |         |   |    |   |   |    |     |          |          |   |
|----------|---------|------|-----|---------|---------|---|----|---|---|----|-----|----------|----------|---|
| WWC2     | 244213  | 295  | -3  | 3074772 | 841584  | 0 | 6  | 3 | 0 | 50 | 45  | 22860540 | 7.73E-01 | 1 |
| ZNF385A  | 664708  | 190  | 45  | 950876  | 321112  | 0 | 2  | 1 | 0 | 50 | 62  | 22308028 | 7.73E-01 | 1 |
| ITPKA    | 820644  | 237  | 37  | 1140268 | 367748  | 0 | 3  | 2 | 0 | 50 | 57  | 18076256 | 7.73E-01 | 1 |
| SLC25A17 | 854552  | 191  | 47  | 790320  | 230688  | 0 | 1  | 1 | 0 | 50 | 68  | 22364988 | 7.73E-01 | 1 |
| TYW3     | 104029  | 1055 | -14 | 692776  | 165896  | 0 | 4  | 1 | 0 | 3  | 7   | 1605204  | 7.73E-01 | 1 |
| KLHL28   | 228561  | 481  | -22 | 1446784 | 400856  | 0 | 6  | 1 | 0 | 50 | 100 | 25336876 | 7.74E-01 | 1 |
| ZNF682   | 468677  | 845  | -59 | 1304740 | 309008  | 0 | 3  | 2 | 0 | 50 | 65  | 17028904 | 7.74E-01 | 1 |
| SLC27A6  | 39183   | 962  | -10 | 1593100 | 431828  | 0 | 5  | 0 | 0 | 50 | 79  | 26451868 | 7.74E-01 | 1 |
| ZNF286B  | NaN     | NaN  | NaN | 1351376 | 337132  | 0 | 2  | 1 | 0 | 50 | 117 | 39982716 | 7.74E-01 | 1 |
| CDC42BP1 | 290976  | 481  | -2  | 4514436 | 1145964 | 0 | 11 | 5 | 0 | 46 | 54  | 19460740 | 7.74E-01 | 1 |
| CCNB2    | 748599  | 329  | 34  | 1035604 | 276968  | 0 | 1  | 0 | 0 | 50 | 49  | 23289876 | 7.74E-01 | 1 |
| NTF4     | 2070141 | 200  | 35  | 497688  | 182628  | 0 | 1  | 0 | 0 | 44 | 57  | 16789316 | 7.74E-01 | 1 |
| CTBP1    | 858194  | 391  | 33  | 1112500 | 344252  | 0 | 2  | 0 | 0 | 50 | 51  | 21376020 | 7.74E-01 | 1 |
| SLC7A3   | 824487  | NaN  | -9  | 1548600 | 488076  | 0 | 4  | 2 | 0 | 50 | 80  | 18280956 | 7.74E-01 | 1 |
| TSN      | 227057  | 517  | 22  | 589536  | 165540  | 0 | 1  | 1 | 0 | 50 | 56  | 21861604 | 7.74E-01 | 1 |
| YPEL4    | 923511  | 354  | 15  | 336776  | 86152   | 0 | 1  | 1 | 0 | 15 | 21  | 4964064  | 7.74E-01 | 1 |
| APOBEC1  | 237142  | 672  | 14  | 624068  | 154504  | 0 | 1  | 0 | 0 | 50 | 67  | 22681828 | 7.74E-01 | 1 |
| SULT1A1  | 1141256 | 269  | 53  | 907088  | 229264  | 0 | 2  | 0 | 0 | 50 | 68  | 22561856 | 7.74E-01 | 1 |
| F10      | 774267  | 229  | 26  | 1270564 | 330368  | 0 | 4  | 2 | 0 | 50 | 74  | 21866944 | 7.74E-01 | 1 |
| PTGS2    | 275352  | 552  | -19 | 1564264 | 412604  | 0 | 5  | 2 | 0 | 9  | 18  | 4567480  | 7.74E-01 | 1 |
| PLS3     | 231348  | NaN  | 3   | 1672844 | 412960  | 0 | 5  | 0 | 0 | 8  | 10  | 4092576  | 7.74E-01 | 1 |
| MTMR7    | 317985  | 345  | 7   | 1731940 | 441440  | 0 | 5  | 1 | 0 | 50 | 64  | 21435116 | 7.75E-01 | 1 |
| SEZ6L2   | NaN     | NaN  | NaN | 2295844 | 737276  | 0 | 8  | 0 | 0 | 7  | 14  | 4425436  | 7.75E-01 | 1 |
| LPAR2    | 768855  | 418  | -10 | 841584  | 292632  | 0 | 2  | 0 | 0 | 50 | 54  | 17193020 | 7.75E-01 | 1 |
| YTHDC2   | 171693  | 686  | 10  | 3715928 | 997156  | 0 | 13 | 2 | 0 | 19 | 26  | 8579244  | 7.75E-01 | 1 |
| C6orf10  | 1754032 | 479  | 27  | 1268072 | 316840  | 0 | 3  | 1 | 0 | 50 | 43  | 15982264 | 7.75E-01 | 1 |
| EEF1G    | 2695768 | 217  | 42  | 1143828 | 300108  | 0 | 3  | 0 | 0 | 17 | 27  | 9232504  | 7.75E-01 | 1 |
| ZNF575   | 416043  | 209  | -10 | 601996  | 194732  | 0 | 1  | 0 | 0 | 50 | 64  | 21352880 | 7.75E-01 | 1 |
| DCLRE1C  | 255711  | 396  | 38  | 1811684 | 466360  | 0 | 5  | 1 | 0 | 29 | 35  | 12433300 | 7.75E-01 | 1 |
| HNMT     | 82611   | 496  | -3  | 954792  | 233892  | 0 | 2  | 1 | 0 | 50 | 66  | 23018248 | 7.75E-01 | 1 |
| FUT4     | 341083  | 589  | -7  | 1263088 | 438236  | 0 | 4  | 2 | 0 | 46 | 50  | 14524444 | 7.75E-01 | 1 |
| ARHGEF9  | 108759  | NaN  | -13 | 1405844 | 327520  | 0 | 3  | 0 | 0 | 50 | 61  | 24015404 | 7.75E-01 | 1 |
| NUDT1    | 814176  | 430  | 38  | 478108  | 122108  | 0 | 1  | 1 | 0 | 41 | 37  | 12492040 | 7.75E-01 | 1 |

|           |         |      |     |         |        |   |    |   |   |    |     |          |          |   |
|-----------|---------|------|-----|---------|--------|---|----|---|---|----|-----|----------|----------|---|
| ZNF782    | 313097  | 491  | 17  | 1824144 | 435744 | 0 | 4  | 1 | 0 | 35 | 29  | 14087988 | 7.75E-01 | 1 |
| UBE2E2    | 385056  | 530  | 2   | 530440  | 138128 | 0 | 1  | 0 | 0 | 50 | 80  | 23662608 | 7.75E-01 | 1 |
| AMBN      | 262055  | 689  | 14  | 1163408 | 325384 | 0 | 3  | 1 | 0 | 50 | 59  | 19443296 | 7.75E-01 | 1 |
| SLC27A3   | 1687837 | 175  | 33  | 1782136 | 600572 | 0 | 6  | 0 | 0 | 2  | 6   | 1657536  | 7.75E-01 | 1 |
| RXFP3     | 268032  | 863  | 8   | 1130656 | 375224 | 0 | 3  | 3 | 0 | 37 | 46  | 14390944 | 7.75E-01 | 1 |
| FDPS      | 1574928 | 194  | 45  | 1086868 | 302600 | 0 | 3  | 0 | 0 | 50 | 57  | 20795740 | 7.75E-01 | 1 |
| BCAS2     | 652485  | 394  | 6   | 604488  | 147384 | 0 | 1  | 0 | 0 | 50 | 52  | 20091572 | 7.75E-01 | 1 |
| UBAP1     | 726384  | 125  | 47  | 1483808 | 404416 | 0 | 3  | 0 | 0 | 9  | 5   | 2918132  | 7.75E-01 | 1 |
| MTO1      | 720190  | 139  | 29  | 1929876 | 554292 | 0 | 3  | 1 | 0 | 43 | 33  | 18388112 | 7.75E-01 | 1 |
| TMEM52    | 1434423 | 233  | 27  | 514064  | 178000 | 0 | 1  | 0 | 0 | 50 | 61  | 20095132 | 7.76E-01 | 1 |
| COPZ2     | 1205950 | 255  | 20  | 561412  | 146672 | 0 | 1  | 0 | 0 | 50 | 81  | 26318368 | 7.76E-01 | 1 |
| PIAS4     | 2296242 | 207  | 29  | 1302604 | 379496 | 0 | 3  | 1 | 0 | 50 | 68  | 25796828 | 7.76E-01 | 1 |
| PGBD4     | 409752  | 384  | 1   | 1472060 | 407620 | 0 | 4  | 0 | 0 | 44 | 44  | 17065216 | 7.76E-01 | 1 |
| KRTAP9-2  | 996799  | 468  | -7  | 445712  | 117124 | 0 | 1  | 0 | 0 | 50 | 60  | 17141400 | 7.76E-01 | 1 |
| SERPINA1  | 278548  | 858  | 13  | 1056252 | 316128 | 0 | 3  | 2 | 0 | 50 | 55  | 16626980 | 7.76E-01 | 1 |
| SPCS2     | 767563  | 454  | 24  | 595232  | 153436 | 0 | 1  | 0 | 0 | 50 | 66  | 22116144 | 7.76E-01 | 1 |
| SPAG16    | 38908   | 1199 | -3  | 1680676 | 425420 | 0 | 6  | 3 | 0 | 12 | 18  | 5605576  | 7.76E-01 | 1 |
| IGFBP7    | 544216  | 314  | 32  | 699540  | 226416 | 0 | 1  | 0 | 0 | 50 | 54  | 21635900 | 7.76E-01 | 1 |
| VIPSNAP3I | 194451  | 718  | -21 | 647920  | 170168 | 0 | 2  | 0 | 0 | 50 | 93  | 21652988 | 7.76E-01 | 1 |
| PRDM13    | 225399  | 799  | 2   | 1702392 | 578856 | 0 | 4  | 1 | 0 | 50 | 49  | 22063456 | 7.76E-01 | 1 |
| IL17C     | 802673  | 189  | 41  | 480244  | 164828 | 0 | 1  | 1 | 0 | 50 | 65  | 20750172 | 7.76E-01 | 1 |
| RASGRP1   | 97743   | 604  | -5  | 2066224 | 558920 | 0 | 5  | 1 | 0 | 23 | 26  | 10841980 | 7.76E-01 | 1 |
| SGPP2     | 283423  | 596  | 13  | 984696  | 312924 | 0 | 2  | 2 | 0 | 33 | 49  | 10883632 | 7.76E-01 | 1 |
| ZNF367    | 355218  | 400  | 23  | 877540  | 264152 | 0 | 1  | 0 | 0 | 50 | 37  | 22078764 | 7.76E-01 | 1 |
| ATP6V0E2  | 438832  | 686  | 26  | 589180  | 211820 | 0 | 1  | 0 | 0 | 11 | 10  | 4417960  | 7.76E-01 | 1 |
| MITD1     | 504421  | 770  | 21  | 666432  | 162336 | 0 | 1  | 0 | 0 | 50 | 44  | 18823144 | 7.76E-01 | 1 |
| PCDHA9    | 896676  | 606  | -12 | 2414392 | 787472 | 0 | 16 | 4 | 0 | 50 | 135 | 24247872 | 7.77E-01 | 1 |
| CYP11B1   | 447193  | 438  | 36  | 1277328 | 373800 | 0 | 4  | 0 | 0 | 1  | 0   | 749380   | 7.77E-01 | 1 |
| KLHDC4    | 594175  | 251  | 28  | 1348528 | 368816 | 0 | 5  | 2 | 0 | 42 | 63  | 16307292 | 7.77E-01 | 1 |
| GPX2      | 521616  | 387  | 35  | 481668  | 136704 | 0 | 1  | 0 | 0 | 50 | 69  | 21146044 | 7.77E-01 | 1 |
| BBS2      | 543900  | 285  | 20  | 1858320 | 523320 | 0 | 4  | 1 | 0 | 44 | 47  | 19608124 | 7.77E-01 | 1 |
| SALL4     | 166846  | 214  | -9  | 2600224 | 791744 | 0 | 6  | 3 | 0 | 22 | 22  | 11229664 | 7.77E-01 | 1 |
| RAPGEF3   | 395089  | 320  | 14  | 2378436 | 699540 | 0 | 5  | 2 | 0 | 50 | 52  | 22689304 | 7.77E-01 | 1 |



|         |         |     |     |         |        |   |   |   |   |    |    |          |          |   |
|---------|---------|-----|-----|---------|--------|---|---|---|---|----|----|----------|----------|---|
| DKK4    | 535273  | 459 | 37  | 574228  | 161624 | 0 | 1 | 1 | 0 | 50 | 58 | 21295208 | 7.77E-01 | 1 |
| ZNF69   | 729638  | 633 | -1  | 413316  | 86508  | 0 | 1 | 1 | 0 | 8  | 7  | 2329664  | 7.77E-01 | 1 |
| STMN4   | 360513  | 561 | 6   | 582060  | 138840 | 0 | 1 | 0 | 0 | 50 | 71 | 22890088 | 7.77E-01 | 1 |
| ST14    | 622463  | 276 | 19  | 2212184 | 607336 | 0 | 5 | 2 | 0 | 28 | 33 | 11617348 | 7.77E-01 | 1 |
| C2orf42 | 677043  | 143 | 42  | 1462448 | 414028 | 0 | 1 | 0 | 0 | 13 | 12 | 5948760  | 7.77E-01 | 1 |
| TBC1D21 | 358897  | 439 | 26  | 907800  | 216804 | 0 | 1 | 0 | 0 | 18 | 16 | 9194768  | 7.77E-01 | 1 |
| GUCY1B3 | 43576   | 643 | -1  | 1615528 | 426488 | 0 | 5 | 0 | 0 | 8  | 8  | 3410480  | 7.77E-01 | 1 |
| FOXD3   | 146780  | 565 | -4  | 1131368 | 403348 | 0 | 1 | 1 | 0 | 50 | 67 | 21689300 | 7.77E-01 | 1 |
| RPF1    | 238252  | 685 | -2  | 918836  | 238876 | 0 | 2 | 1 | 0 | 50 | 57 | 18845928 | 7.77E-01 | 1 |
| VKORC1  | 1296884 | 351 | 35  | 435744  | 98256  | 0 | 1 | 1 | 0 | 12 | 24 | 6411204  | 7.77E-01 | 1 |
| YIPF6   | 201571  | NaN | 12  | 612676  | 174440 | 0 | 1 | 0 | 0 | 50 | 61 | 18944896 | 7.77E-01 | 1 |
| LUM     | 23173   | 523 | -18 | 855468  | 239232 | 0 | 2 | 0 | 0 | 39 | 59 | 16633032 | 7.77E-01 | 1 |
| HSF5    | 818916  | 384 | 23  | 1486300 | 447848 | 0 | 3 | 0 | 0 | 22 | 31 | 14264208 | 7.78E-01 | 1 |
| EXD3    | 1632320 | 208 | 30  | 2212540 | 689216 | 0 | 5 | 0 | 0 | 6  | 12 | 3901048  | 7.78E-01 | 1 |
| OXSRI   | 301294  | 386 | 31  | 1390536 | 373800 | 0 | 2 | 0 | 0 | 50 | 39 | 22178088 | 7.78E-01 | 1 |
| ATP13A1 | 768855  | 418 | -10 | 3029560 | 940196 | 0 | 6 | 2 | 0 | 19 | 23 | 8318652  | 7.78E-01 | 1 |
| SOD2    | 643775  | 604 | 19  | 583840  | 152012 | 0 | 1 | 1 | 0 | 50 | 53 | 20025356 | 7.78E-01 | 1 |
| GPSM1   | 1194160 | 258 | 28  | 1843368 | 554292 | 0 | 5 | 1 | 0 | 50 | 42 | 16832036 | 7.78E-01 | 1 |
| TTLL12  | 624112  | 241 | 48  | 1662164 | 462088 | 0 | 5 | 2 | 0 | 50 | 66 | 22537648 | 7.78E-01 | 1 |
| IPO4    | 974559  | 220 | 41  | 2745828 | 844788 | 0 | 7 | 1 | 0 | 7  | 5  | 2187620  | 7.78E-01 | 1 |
| KLHDC1  | 627751  | 342 | 18  | 1098972 | 258456 | 0 | 2 | 0 | 0 | 50 | 47 | 19771172 | 7.78E-01 | 1 |
| ANKMY2  | 291955  | 612 | -13 | 1165188 | 289428 | 0 | 2 | 0 | 0 | 9  | 6  | 3485240  | 7.78E-01 | 1 |
| BCL6B   | 1696302 | 360 | 24  | 1195804 | 376292 | 0 | 3 | 1 | 0 | 50 | 49 | 16256384 | 7.78E-01 | 1 |
| IFT74   | 116568  | 447 | -12 | 1701680 | 376648 | 0 | 2 | 1 | 0 | 50 | 64 | 23869088 | 7.78E-01 | 1 |
| PTGIR   | 1139694 | 347 | 28  | 923464  | 325028 | 0 | 2 | 1 | 0 | 10 | 11 | 4186916  | 7.78E-01 | 1 |
| ADPRH   | 289679  | 595 | 40  | 905664  | 254184 | 0 | 2 | 2 | 0 | 15 | 13 | 4953740  | 7.78E-01 | 1 |
| TJP2    | 224404  | 525 | 24  | 3264164 | 918124 | 0 | 9 | 1 | 0 | 20 | 17 | 8052008  | 7.79E-01 | 1 |
| GSTP1   | 1374022 | 393 | 53  | 545392  | 159488 | 0 | 1 | 0 | 0 | 50 | 76 | 21858400 | 7.79E-01 | 1 |
| PCSK6   | 372683  | 406 | -1  | 2888940 | 811680 | 0 | 8 | 1 | 0 | 16 | 15 | 5500912  | 7.79E-01 | 1 |
| TMC1    | 395593  | 486 | 10  | 2031336 | 492348 | 0 | 5 | 2 | 0 | 50 | 44 | 19918200 | 7.79E-01 | 1 |
| BMP8B   | 975799  | 388 | 39  | 1021720 | 319688 | 0 | 2 | 1 | 0 | 50 | 81 | 18001852 | 7.79E-01 | 1 |
| MTSS1L  | 880781  | 184 | 34  | 1862236 | 594164 | 0 | 4 | 2 | 0 | 50 | 66 | 22674352 | 7.79E-01 | 1 |
| TMEM61  | 454766  | 217 | 13  | 512640  | 171948 | 0 | 3 | 2 | 0 | 3  | 5  | 1042368  | 7.79E-01 | 1 |

|          |         |     |     |         |        |   |    |   |   |    |    |          |          |   |
|----------|---------|-----|-----|---------|--------|---|----|---|---|----|----|----------|----------|---|
| ATP6V1E1 | 431401  | 243 | -32 | 614812  | 146672 | 0 | 2  | 1 | 0 | 50 | 96 | 21207632 | 7.79E-01 | 1 |
| CHN2     | 249263  | 599 | 5   | 1370600 | 360628 | 0 | 2  | 0 | 0 | 13 | 9  | 5616968  | 7.79E-01 | 1 |
| KSR2     | 639801  | 685 | -6  | 2369180 | 668212 | 0 | 8  | 2 | 0 | 10 | 20 | 5464956  | 7.79E-01 | 1 |
| TP53AIP1 | 195815  | 580 | -2  | 269492  | 84016  | 0 | 1  | 1 | 0 | 2  | 2  | 684232   | 7.79E-01 | 1 |
| GZMA     | 222027  | 430 | 1   | 674976  | 189036 | 0 | 1  | 0 | 0 | 50 | 55 | 23634840 | 7.79E-01 | 1 |
| CFHR1    | 205744  | 852 | -29 | 854400  | 227484 | 0 | 3  | 1 | 0 | 17 | 30 | 7614128  | 7.79E-01 | 1 |
| DGKD     | 397457  | 227 | 33  | 3169468 | 875048 | 0 | 8  | 2 | 0 | 24 | 21 | 8698148  | 7.79E-01 | 1 |
| OLFM1    | 199862  | 446 | 28  | 1212892 | 316484 | 0 | 2  | 2 | 0 | 7  | 11 | 3551812  | 7.79E-01 | 1 |
| OR6Q1    | NaN     | NaN | NaN | 774656  | 243148 | 0 | 3  | 3 | 0 | 8  | 19 | 4169116  | 7.79E-01 | 1 |
| SLC23A2  | 476336  | 464 | 37  | 1658604 | 487008 | 0 | 3  | 3 | 0 | 50 | 71 | 21447932 | 7.79E-01 | 1 |
| C17orf75 | 679038  | 286 | 30  | 1051980 | 260592 | 0 | 2  | 0 | 0 | 50 | 56 | 21353948 | 7.79E-01 | 1 |
| LIPA     | 254295  | 263 | 31  | 1053404 | 265576 | 0 | 2  | 1 | 0 | 50 | 55 | 18781492 | 7.79E-01 | 1 |
| FNBP1L   | 621313  | 224 | 2   | 1648992 | 380208 | 0 | 3  | 0 | 0 | 5  | 5  | 3328600  | 7.79E-01 | 1 |
| AZIN1    | 689560  | 171 | 54  | 1186548 | 294768 | 0 | 5  | 1 | 0 | 50 | 79 | 19000432 | 7.79E-01 | 1 |
| IKZF1    | 160478  | NaN | 37  | 1346036 | 349948 | 0 | 5  | 4 | 0 | 29 | 47 | 9257424  | 7.79E-01 | 1 |
| ZNF253   | 550586  | 609 | -52 | 1296196 | 320756 | 0 | 3  | 1 | 0 | 37 | 99 | 25776892 | 7.79E-01 | 1 |
| KIAA0391 | 586870  | 321 | 38  | 1499828 | 396940 | 0 | 4  | 0 | 0 | 7  | 9  | 2967972  | 7.79E-01 | 1 |
| CPSF3    | 658161  | 278 | 37  | 1819516 | 452120 | 0 | 5  | 3 | 0 | 34 | 48 | 13006104 | 7.80E-01 | 1 |
| RRAS     | 1733181 | 195 | 36  | 554648  | 170524 | 0 | 1  | 2 | 0 | 4  | 5  | 1157712  | 7.80E-01 | 1 |
| NOX3     | 108543  | 628 | 13  | 1479536 | 400144 | 0 | 5  | 0 | 0 | 16 | 20 | 6825232  | 7.80E-01 | 1 |
| RAB6C    | 342211  | 671 | 4   | 631900  | 185120 | 0 | 2  | 1 | 0 | 12 | 15 | 3773956  | 7.80E-01 | 1 |
| MAP3K7   | 74576   | 643 | 17  | 1610188 | 402992 | 0 | 3  | 1 | 0 | 50 | 58 | 18976580 | 7.80E-01 | 1 |
| ARID5B   | 81587   | 388 | 20  | 3014252 | 833752 | 0 | 7  | 4 | 0 | 36 | 39 | 15542248 | 7.80E-01 | 1 |
| SATB2    | 104340  | 978 | 2   | 1872204 | 522252 | 0 | 6  | 2 | 0 | 50 | 57 | 18316200 | 7.80E-01 | 1 |
| ADAM29   | 49942   | 889 | -36 | 2085448 | 545036 | 0 | 12 | 2 | 0 | 4  | 9  | 1643296  | 7.80E-01 | 1 |
| PAX1     | 283661  | 885 | -41 | 1283024 | 450340 | 0 | 6  | 1 | 0 | 24 | 32 | 7441824  | 7.80E-01 | 1 |
| ALX1     | 35916   | 925 | -34 | 839804  | 222856 | 0 | 5  | 2 | 0 | 21 | 43 | 6896788  | 7.80E-01 | 1 |
| CD1B     | 128145  | 833 | 4   | 849060  | 242436 | 0 | 3  | 2 | 0 | 28 | 39 | 9447172  | 7.80E-01 | 1 |
| LGALS14  | 1243326 | 439 | 23  | 453544  | 118904 | 0 | 1  | 1 | 0 | 38 | 41 | 11948784 | 7.80E-01 | 1 |
| PCYT2    | 3798594 | 211 | 19  | 1070492 | 292276 | 0 | 2  | 0 | 0 | 34 | 28 | 11428668 | 7.80E-01 | 1 |
| ELP2     | 390096  | 591 | 41  | 2180144 | 563548 | 0 | 5  | 2 | 0 | 50 | 64 | 21297344 | 7.80E-01 | 1 |
| BTN2A1   | 384310  | 375 | 47  | 1361700 | 386616 | 0 | 4  | 2 | 0 | 50 | 51 | 17347168 | 7.80E-01 | 1 |
| FAM65A   | 1082466 | 153 | 49  | 3015320 | 983272 | 0 | 5  | 4 | 0 | 34 | 29 | 12620200 | 7.81E-01 | 1 |

|          |         |     |     |         |         |   |    |   |   |    |     |          |          |   |
|----------|---------|-----|-----|---------|---------|---|----|---|---|----|-----|----------|----------|---|
| UBE2K    | 621887  | 145 | 45  | 529016  | 140620  | 0 | 1  | 0 | 0 | 50 | 61  | 20374236 | 7.81E-01 | 1 |
| ZNF333   | 1032767 | 448 | 29  | 1722684 | 458172  | 0 | 2  | 2 | 0 | 50 | 65  | 24090164 | 7.81E-01 | 1 |
| U2AF1    | 687433  | 279 | 59  | 697404  | 182628  | 0 | 1  | 0 | 0 | 47 | 50  | 18430476 | 7.81E-01 | 1 |
| FPR1     | 436280  | 690 | -24 | 854756  | 274120  | 0 | 2  | 2 | 0 | 50 | 53  | 16569308 | 7.81E-01 | 1 |
| PFKFB4   | 1480689 | 223 | 45  | 1232116 | 331436  | 0 | 1  | 1 | 0 | 50 | 66  | 22607068 | 7.81E-01 | 1 |
| DSG1     | 255599  | 412 | 15  | 2670356 | 753652  | 0 | 7  | 1 | 0 | 4  | 3   | 2311152  | 7.81E-01 | 1 |
| N4BP2L2  | 237148  | 455 | 47  | 3142056 | 737988  | 0 | 12 | 1 | 0 | 8  | 17  | 5284108  | 7.81E-01 | 1 |
| DUSP21   | 66992   | NaN | 15  | 472768  | 139196  | 0 | 1  | 1 | 0 | 44 | 68  | 20182352 | 7.81E-01 | 1 |
| PRX      | 1008676 | 202 | 34  | 3522264 | 1244220 | 0 | 15 | 5 | 0 | 8  | 10  | 3459252  | 7.81E-01 | 1 |
| PIK3IP1  | 667559  | 221 | 43  | 673908  | 193308  | 0 | 1  | 0 | 0 | 50 | 51  | 21792540 | 7.81E-01 | 1 |
| SCGN     | 260299  | 630 | 23  | 754364  | 175864  | 0 | 1  | 0 | 0 | 19 | 12  | 6945916  | 7.81E-01 | 1 |
| MC4R     | 44259   | 929 | 3   | 830548  | 238520  | 0 | 1  | 1 | 0 | 18 | 14  | 7680344  | 7.81E-01 | 1 |
| ZNF32    | 310272  | 630 | -6  | 704168  | 182272  | 0 | 1  | 0 | 0 | 50 | 50  | 20373168 | 7.81E-01 | 1 |
| KCNH7    | 70298   | 965 | -6  | 3122120 | 847636  | 0 | 8  | 3 | 0 | 47 | 50  | 17358560 | 7.81E-01 | 1 |
| LRRC8B   | 360067  | 647 | 5   | 2015672 | 568888  | 0 | 5  | 2 | 0 | 50 | 73  | 22210128 | 7.81E-01 | 1 |
| SELO     | 944000  | 242 | 49  | 1648992 | 534000  | 0 | 2  | 1 | 0 | 50 | 67  | 23711024 | 7.81E-01 | 1 |
| XPA      | 484322  | 358 | 36  | 722680  | 176576  | 0 | 1  | 0 | 0 | 50 | 49  | 17917836 | 7.81E-01 | 1 |
| C1orf105 | 135244  | 400 | 11  | 492348  | 122820  | 0 | 1  | 0 | 0 | 50 | 62  | 19992960 | 7.82E-01 | 1 |
| ALOX15   | 1226703 | 318 | 25  | 1684236 | 497688  | 0 | 4  | 0 | 0 | 13 | 18  | 5723056  | 7.82E-01 | 1 |
| COL23A1  | 533179  | 634 | 18  | 1394452 | 458528  | 0 | 4  | 0 | 0 | 23 | 31  | 9739448  | 7.82E-01 | 1 |
| MSX2     | 30602   | 599 | 14  | 649700  | 215380  | 0 | 1  | 0 | 0 | 50 | 63  | 23587848 | 7.82E-01 | 1 |
| GSX1     | 338630  | 610 | 36  | 641156  | 216448  | 0 | 1  | 0 | 0 | 50 | 50  | 21149604 | 7.82E-01 | 1 |
| HOXA4    | 356045  | 385 | 28  | 776436  | 258456  | 0 | 1  | 0 | 0 | 50 | 46  | 22711376 | 7.82E-01 | 1 |
| ZNF324   | 2179183 | 270 | -4  | 1357784 | 430048  | 0 | 4  | 1 | 0 | 50 | 76  | 25634848 | 7.82E-01 | 1 |
| ALPP     | 307666  | 204 | 37  | 1341052 | 419012  | 0 | 3  | 3 | 0 | 50 | 41  | 16352860 | 7.82E-01 | 1 |
| YOD1     | 434877  | 155 | 24  | 862944  | 261660  | 0 | 2  | 0 | 0 | 22 | 32  | 10203316 | 7.82E-01 | 1 |
| DUSP27   | 287664  | 611 | -1  | 2919200 | 811324  | 0 | 7  | 5 | 0 | 13 | 16  | 5255984  | 7.82E-01 | 1 |
| ZNF25    | 140131  | 959 | -27 | 1207908 | 277680  | 0 | 4  | 1 | 0 | 50 | 101 | 25523420 | 7.82E-01 | 1 |
| ACTL7A   | 336944  | 471 | 9   | 1076188 | 320756  | 0 | 2  | 2 | 0 | 50 | 49  | 19942052 | 7.82E-01 | 1 |
| MYRIP    | 195545  | 917 | 9   | 2208268 | 615524  | 0 | 2  | 0 | 0 | 6  | 1   | 2691716  | 7.82E-01 | 1 |
| HS3ST3A1 | 116063  | 727 | -76 | 982204  | 326096  | 0 | 3  | 1 | 0 | 50 | 88  | 21898628 | 7.82E-01 | 1 |
| TPPP2    | 971417  | 320 | 12  | 445356  | 117480  | 0 | 1  | 1 | 0 | 37 | 52  | 10249952 | 7.82E-01 | 1 |
| NRD1     | 707583  | 382 | 16  | 3228208 | 819512  | 0 | 13 | 2 | 0 | 9  | 14  | 5452852  | 7.82E-01 | 1 |

|          |         |      |     |         |        |   |    |   |   |    |     |          |          |   |
|----------|---------|------|-----|---------|--------|---|----|---|---|----|-----|----------|----------|---|
| MPRSS11  | 108503  | 748  | 7   | 1105380 | 293700 | 0 | 5  | 2 | 0 | 4  | 5   | 1709868  | 7.82E-01 | 1 |
| TFEB     | 458237  | 251  | 49  | 1211112 | 351372 | 0 | 2  | 1 | 0 | 50 | 38  | 17579280 | 7.82E-01 | 1 |
| OR52H1   | 99343   | 946  | -2  | 791032  | 236384 | 0 | 3  | 2 | 0 | 50 | 83  | 21652988 | 7.82E-01 | 1 |
| PRKAB1   | 782827  | 498  | 17  | 703456  | 190460 | 0 | 3  | 2 | 0 | 2  | 3   | 1028128  | 7.82E-01 | 1 |
| FBXL22   | 754243  | 197  | 47  | 587044  | 194732 | 0 | 1  | 0 | 0 | 50 | 51  | 18910364 | 7.83E-01 | 1 |
| ARHGAP18 | 73209   | 550  | 26  | 1745112 | 444288 | 0 | 5  | 0 | 0 | 7  | 7   | 3591684  | 7.83E-01 | 1 |
| HIPK4    | 1006719 | 289  | 35  | 1531868 | 457816 | 0 | 7  | 3 | 0 | 20 | 41  | 9222180  | 7.83E-01 | 1 |
| SDC3     | 392864  | 269  | 48  | 1052336 | 386260 | 0 | 2  | 1 | 0 | 50 | 54  | 20471068 | 7.83E-01 | 1 |
| GALNT7   | 249234  | 381  | 15  | 1716276 | 441084 | 0 | 4  | 1 | 0 | 50 | 56  | 21942416 | 7.83E-01 | 1 |
| DHFRL1   | 85529   | 1378 | -18 | 480600  | 126024 | 0 | 1  | 0 | 0 | 50 | 62  | 20142480 | 7.83E-01 | 1 |
| XPC      | 308100  | 258  | 33  | 1526528 | 430048 | 0 | 4  | 0 | 0 | 18 | 15  | 6102552  | 7.83E-01 | 1 |
| NXPH3    | 1007676 | 348  | 26  | 628340  | 186544 | 0 | 1  | 0 | 0 | 50 | 66  | 18748384 | 7.83E-01 | 1 |
| KLHL23   | 342296  | 393  | 35  | 1435036 | 368816 | 0 | 4  | 2 | 0 | 50 | 59  | 20786484 | 7.83E-01 | 1 |
| SERPINB2 | 152044  | 522  | 12  | 1082240 | 280528 | 0 | 2  | 0 | 0 | 50 | 65  | 26208720 | 7.83E-01 | 1 |
| ZNF799   | 1754294 | 593  | 0   | 1676048 | 400144 | 0 | 5  | 1 | 0 | 50 | 80  | 24610280 | 7.83E-01 | 1 |
| RAB3D    | 1385739 | 197  | 31  | 567464  | 154504 | 0 | 1  | 0 | 0 | 50 | 60  | 22230420 | 7.83E-01 | 1 |
| NLRP5    | 631041  | 561  | -72 | 3035968 | 871844 | 0 | 11 | 4 | 0 | 15 | 60  | 16264572 | 7.83E-01 | 1 |
| SPAM1    | 87688   | 541  | -19 | 1346392 | 359204 | 0 | 2  | 1 | 0 | 50 | 66  | 21591400 | 7.83E-01 | 1 |
| CHCHD2   | 738325  | 642  | 4   | 381276  | 120684 | 0 | 1  | 0 | 0 | 50 | 103 | 24262112 | 7.83E-01 | 1 |
| ELMO3    | 1109491 | 150  | 46  | 1977580 | 585620 | 0 | 2  | 1 | 0 | 6  | 2   | 3107880  | 7.83E-01 | 1 |
| ZC3H7A   | 585294  | 214  | 41  | 2578152 | 625848 | 0 | 5  | 2 | 0 | 7  | 7   | 2417596  | 7.83E-01 | 1 |
| BEST4    | 574317  | 191  | 43  | 1189752 | 365256 | 0 | 3  | 1 | 0 | 50 | 62  | 20422296 | 7.83E-01 | 1 |
| EPB41L5  | 218487  | 406  | 27  | 2110368 | 539340 | 0 | 5  | 0 | 0 | 32 | 30  | 12969080 | 7.83E-01 | 1 |
| ZNF354B  | 204252  | 845  | 6   | 1592744 | 388396 | 0 | 2  | 1 | 0 | 50 | 57  | 19290928 | 7.83E-01 | 1 |
| APOO     | 509881  | NaN  | 41  | 535780  | 135992 | 0 | 1  | 0 | 0 | 50 | 81  | 26944928 | 7.83E-01 | 1 |
| LOXL2    | 484892  | 288  | 41  | 2008196 | 530440 | 0 | 6  | 1 | 0 | 30 | 34  | 11783956 | 7.83E-01 | 1 |
| STAT6    | 2122802 | 172  | 52  | 2178720 | 627984 | 0 | 7  | 0 | 0 | 6  | 7   | 2714856  | 7.83E-01 | 1 |
| RNASE1   | 956361  | 577  | 8   | 393736  | 113564 | 0 | 1  | 0 | 0 | 50 | 92  | 23350396 | 7.83E-01 | 1 |
| CMTM5    | 1220624 | 456  | 31  | 400144  | 119972 | 0 | 1  | 1 | 0 | 20 | 38  | 9710256  | 7.84E-01 | 1 |
| TUBGCP2  | 362932  | 393  | 1   | 2313644 | 652192 | 0 | 5  | 5 | 0 | 34 | 35  | 12937752 | 7.84E-01 | 1 |
| AASDH    | 639545  | 594  | 5   | 2809908 | 771096 | 0 | 9  | 1 | 0 | 4  | 6   | 2392320  | 7.84E-01 | 1 |
| TADA3    | 953772  | 264  | 43  | 1106092 | 317552 | 0 | 2  | 0 | 0 | 50 | 72  | 27173124 | 7.84E-01 | 1 |
| KIRREL   | 120128  | 589  | 13  | 1908160 | 580280 | 0 | 10 | 4 | 0 | 2  | 5   | 1226420  | 7.84E-01 | 1 |

|          |         |     |     |          |         |   |    |    |   |    |     |          |          |   |
|----------|---------|-----|-----|----------|---------|---|----|----|---|----|-----|----------|----------|---|
| VPS53    | 486092  | 514 | 7   | 2178720  | 593808  | 0 | 2  | 2  | 0 | 50 | 59  | 19809976 | 7.84E-01 | 1 |
| ACSL1    | 311713  | 515 | 30  | 1829128  | 495908  | 0 | 3  | 1  | 0 | 50 | 75  | 23657268 | 7.84E-01 | 1 |
| VEZT     | 371223  | 395 | 30  | 2002500  | 543612  | 0 | 4  | 3  | 0 | 33 | 33  | 11394136 | 7.84E-01 | 1 |
| KCNV2    | 158557  | 682 | -5  | 1348528  | 407264  | 0 | 3  | 0  | 0 | 12 | 16  | 5906396  | 7.84E-01 | 1 |
| NEBL     | 71095   | 484 | -19 | 3074416  | 689216  | 0 | 9  | 3  | 0 | 50 | 59  | 18867288 | 7.84E-01 | 1 |
| PPAT     | 651147  | 594 | 16  | 1333220  | 369172  | 0 | 3  | 0  | 0 | 6  | 14  | 4229992  | 7.84E-01 | 1 |
| VCPIP1   | 372262  | 213 | 38  | 3036324  | 890712  | 0 | 8  | 1  | 0 | 33 | 30  | 14246764 | 7.84E-01 | 1 |
| FAM105A  | 514082  | 380 | 28  | 937704   | 236028  | 0 | 3  | 3  | 0 | 6  | 6   | 1702036  | 7.84E-01 | 1 |
| NOL3     | 1109491 | 150 | 46  | 631544   | 96832   | 0 | 2  | 1  | 0 | 2  | 2   | 991104   | 7.84E-01 | 1 |
| FAM160B2 | 584373  | 219 | 34  | 1723752  | 515844  | 0 | 3  | 0  | 0 | 8  | 6   | 3997880  | 7.84E-01 | 1 |
| FAM118B  | 493677  | 341 | 28  | 915276   | 242436  | 0 | 3  | 0  | 0 | 15 | 28  | 7604160  | 7.84E-01 | 1 |
| RAD18    | 302992  | 473 | 18  | 1320760  | 321824  | 0 | 2  | 0  | 0 | 17 | 17  | 9148844  | 7.84E-01 | 1 |
| KDEL2    | NaN     | NaN | NaN | 696336   | 190104  | 0 | 1  | 0  | 0 | 50 | 116 | 39835688 | 7.84E-01 | 1 |
| PMVK     | 1695232 | 224 | 37  | 496620   | 138840  | 0 | 1  | 0  | 0 | 12 | 18  | 6034912  | 7.84E-01 | 1 |
| KCNJ5    | 194422  | 602 | 1   | 1055184  | 299040  | 0 | 2  | 1  | 0 | 50 | 53  | 20284524 | 7.84E-01 | 1 |
| NAP1L3   | 33770   | NaN | -11 | 1296908  | 327520  | 0 | 3  | 0  | 0 | 4  | 7   | 2344260  | 7.84E-01 | 1 |
| ACTC1    | 521214  | 306 | -1  | 965116   | 271628  | 0 | 2  | 1  | 0 | 50 | 69  | 23359652 | 7.84E-01 | 1 |
| SORCS2   | 279342  | 555 | 36  | 2943052  | 884660  | 0 | 6  | 1  | 0 | 3  | 3   | 2259888  | 7.84E-01 | 1 |
| VRK3     | 1661159 | 187 | 40  | 1242084  | 334284  | 0 | 4  | 1  | 0 | 50 | 74  | 21280612 | 7.84E-01 | 1 |
| RPA2     | 891090  | 272 | 20  | 714492   | 187968  | 0 | 1  | 0  | 0 | 50 | 57  | 20821372 | 7.84E-01 | 1 |
| EXOSC2   | 505506  | 211 | 24  | 763620   | 214668  | 0 | 2  | 0  | 0 | 25 | 34  | 10186940 | 7.85E-01 | 1 |
| RRAS2    | 428878  | 363 | -3  | 545392   | 138128  | 0 | 1  | 0  | 0 | 50 | 53  | 18346104 | 7.85E-01 | 1 |
| KCNK4    | 1613996 | 257 | 65  | 956216   | 331792  | 0 | 2  | 4  | 0 | 19 | 29  | 6446448  | 7.85E-01 | 1 |
| OTOF     | 787643  | 408 | 41  | 5434340  | 1510864 | 0 | 19 | 6  | 0 | 33 | 41  | 14192652 | 7.85E-01 | 1 |
| PPP2R5C  | 1400431 | 346 | 28  | 1723040  | 432184  | 0 | 4  | 0  | 0 | 50 | 70  | 19832760 | 7.85E-01 | 1 |
| NR0B1    | 73561   | NaN | 28  | 1156644  | 358848  | 0 | 2  | 0  | 0 | 50 | 64  | 26759452 | 7.85E-01 | 1 |
| GTF2F2   | 613630  | 276 | 50  | 661804   | 169100  | 0 | 1  | 0  | 0 | 50 | 49  | 18713496 | 7.85E-01 | 1 |
| RCE1     | 1628594 | 187 | 29  | 823072   | 266288  | 0 | 3  | 0  | 0 | 50 | 79  | 20457184 | 7.85E-01 | 1 |
| SYNPO2   | 267272  | 589 | 2   | 3194032  | 981848  | 0 | 14 | 2  | 0 | 2  | 3   | 1477756  | 7.85E-01 | 1 |
| KATNAL1  | 288583  | 374 | 48  | 1278040  | 337844  | 0 | 1  | 2  | 0 | 44 | 50  | 17206904 | 7.85E-01 | 1 |
| DNAH8    | 229301  | 845 | 25  | 11765088 | 3004284 | 0 | 41 | 11 | 0 | 16 | 37  | 10762236 | 7.85E-01 | 1 |
| PMM1     | 1467336 | 183 | 66  | 690284   | 184408  | 0 | 4  | 3  | 0 | 6  | 9   | 1870780  | 7.85E-01 | 1 |
| AMELX    | NaN     | NaN | NaN | 537204   | 148452  | 0 | 1  | 0  | 0 | 50 | 116 | 39794036 | 7.85E-01 | 1 |

|         |         |     |     |          |         |   |    |   |   |    |    |          |          |   |
|---------|---------|-----|-----|----------|---------|---|----|---|---|----|----|----------|----------|---|
| METTL4  | 247615  | 485 | -5  | 1229268  | 316128  | 0 | 3  | 0 | 0 | 19 | 22 | 8226804  | 7.85E-01 | 1 |
| AMPD2   | 989433  | 201 | 29  | 2273416  | 658244  | 0 | 7  | 3 | 0 | 50 | 79 | 23548688 | 7.85E-01 | 1 |
| LCA5    | 300263  | 564 | 0   | 1800648  | 461376  | 0 | 6  | 0 | 0 | 7  | 4  | 2150952  | 7.85E-01 | 1 |
| NRG4    | 467195  | 406 | 28  | 316484   | 76540   | 0 | 1  | 1 | 0 | 1  | 4  | 1037028  | 7.85E-01 | 1 |
| FNBP1   | 559377  | 228 | 38  | 1661452  | 386972  | 0 | 4  | 1 | 0 | 50 | 55 | 21540492 | 7.85E-01 | 1 |
| HEBP1   | 701221  | 196 | 10  | 487720   | 133856  | 0 | 1  | 0 | 0 | 50 | 75 | 22618816 | 7.85E-01 | 1 |
| HAT1    | 537965  | 177 | 33  | 1123536  | 267000  | 0 | 4  | 1 | 0 | 50 | 76 | 21530880 | 7.85E-01 | 1 |
| SH3RF1  | 241771  | 244 | 24  | 2197232  | 698116  | 0 | 8  | 1 | 0 | 8  | 8  | 3431840  | 7.85E-01 | 1 |
| FCRL1   | 113186  | 829 | 26  | 1171952  | 318976  | 0 | 3  | 2 | 0 | 18 | 20 | 6578880  | 7.86E-01 | 1 |
| ZRANB2  | 107389  | 955 | -15 | 909224   | 234604  | 0 | 2  | 0 | 0 | 50 | 73 | 23083752 | 7.86E-01 | 1 |
| POLR1E  | 523221  | 234 | 35  | 1105024  | 289784  | 0 | 3  | 1 | 0 | 50 | 50 | 18959848 | 7.86E-01 | 1 |
| GALE    | 903441  | 254 | 32  | 903172   | 257744  | 0 | 2  | 0 | 0 | 50 | 57 | 18158136 | 7.86E-01 | 1 |
| EPHX2   | 336774  | 361 | 36  | 1475976  | 384480  | 0 | 4  | 2 | 0 | 50 | 57 | 18999008 | 7.86E-01 | 1 |
| ABCC10  | 1270265 | 230 | 49  | 3556440  | 1218588 | 0 | 7  | 3 | 0 | 36 | 41 | 15982976 | 7.86E-01 | 1 |
| CRLS1   | 301141  | 290 | 4   | 766112   | 238876  | 0 | 1  | 1 | 0 | 50 | 52 | 25209428 | 7.86E-01 | 1 |
| NRBP1   | 1244404 | 179 | 39  | 1409404  | 380564  | 0 | 4  | 1 | 0 | 50 | 61 | 21622372 | 7.86E-01 | 1 |
| LIMK1   | 1047202 | 219 | 52  | 1666080  | 474192  | 0 | 7  | 0 | 0 | 4  | 6  | 1929520  | 7.86E-01 | 1 |
| CYCS    | 254010  | 319 | 11  | 280172   | 67996   | 0 | 1  | 1 | 0 | 2  | 3  | 773232   | 7.86E-01 | 1 |
| NEB     | 248944  | 641 | 13  | 22791476 | 5411200 | 0 | 45 | 8 | 0 | 3  | 10 | 6549688  | 7.86E-01 | 1 |
| SLC10A3 | 2163759 | NaN | 42  | 1131368  | 400144  | 0 | 3  | 2 | 0 | 50 | 72 | 22102972 | 7.86E-01 | 1 |
| RIN1    | 2048585 | 182 | 54  | 1891428  | 658956  | 0 | 3  | 3 | 0 | 50 | 70 | 23587492 | 7.86E-01 | 1 |
| KLHL22  | 542099  | 326 | 28  | 1593100  | 467072  | 0 | 3  | 3 | 0 | 22 | 36 | 10953764 | 7.86E-01 | 1 |
| R3HDM2  | 1862761 | 172 | 55  | 2531160  | 690996  | 0 | 5  | 0 | 0 | 7  | 5  | 2754728  | 7.86E-01 | 1 |
| VAMP2   | 1381225 | 202 | 37  | 308652   | 85440   | 0 | 1  | 1 | 0 | 2  | 1  | 591672   | 7.86E-01 | 1 |
| ITGA3   | 1197823 | 210 | 20  | 2810620  | 835532  | 0 | 8  | 1 | 0 | 9  | 9  | 3119272  | 7.86E-01 | 1 |
| GFM2    | 418815  | 581 | 30  | 2057680  | 561056  | 0 | 3  | 1 | 0 | 22 | 16 | 7517296  | 7.86E-01 | 1 |
| PROM2   | 238302  | 558 | 8   | 2120336  | 653260  | 0 | 3  | 2 | 0 | 50 | 60 | 22920704 | 7.87E-01 | 1 |
| CPNE7   | 1094600 | 211 | 38  | 1631904  | 467784  | 0 | 3  | 0 | 0 | 4  | 1  | 1545396  | 7.87E-01 | 1 |
| KLF8    | 111210  | NaN | 1   | 914208   | 260592  | 0 | 2  | 0 | 0 | 50 | 58 | 16395936 | 7.87E-01 | 1 |
| FOXM1   | 495532  | 443 | 28  | 2004280  | 603776  | 0 | 10 | 4 | 0 | 7  | 16 | 3959432  | 7.87E-01 | 1 |
| ZDHHC15 | 101818  | NaN | -11 | 975796   | 237452  | 0 | 2  | 0 | 0 | 50 | 78 | 27065968 | 7.87E-01 | 1 |
| COPB1   | 365537  | 228 | 11  | 2486304  | 660024  | 0 | 5  | 1 | 0 | 50 | 55 | 21429420 | 7.87E-01 | 1 |
| TRIM17  | 654512  | 278 | 7   | 1332508  | 388040  | 0 | 3  | 2 | 0 | 50 | 76 | 28604244 | 7.87E-01 | 1 |

|          |         |      |     |          |         |   |    |    |   |    |     |          |          |   |
|----------|---------|------|-----|----------|---------|---|----|----|---|----|-----|----------|----------|---|
| MFSD5    | 1677275 | 191  | 49  | 1339272  | 454968  | 0 | 5  | 1  | 0 | 2  | 9   | 2217524  | 7.87E-01 | 1 |
| C17orf85 | 505430  | 215  | 30  | 1625140  | 417944  | 0 | 4  | 0  | 0 | 24 | 27  | 9391636  | 7.87E-01 | 1 |
| DYNC2LI1 | 544941  | 480  | 35  | 1041300  | 254184  | 0 | 2  | 0  | 0 | 50 | 81  | 24603160 | 7.87E-01 | 1 |
| OR5AN1   | 417582  | 672  | -4  | 775012   | 223568  | 0 | 2  | 2  | 0 | 35 | 51  | 14743384 | 7.87E-01 | 1 |
| GAD2     | 101835  | 680  | -1  | 1553940  | 391956  | 0 | 7  | 5  | 0 | 4  | 12  | 2138492  | 7.87E-01 | 1 |
| CFLAR    | 617625  | 205  | 39  | 1300824  | 340692  | 0 | 2  | 0  | 0 | 25 | 25  | 11232512 | 7.87E-01 | 1 |
| NDOR1    | 1724821 | 399  | 43  | 1527240  | 473124  | 0 | 3  | 3  | 0 | 50 | 60  | 16636592 | 7.87E-01 | 1 |
| TOMM40L  | 731911  | 229  | 39  | 793168   | 231044  | 0 | 1  | 0  | 0 | 50 | 46  | 23778308 | 7.87E-01 | 1 |
| ARTN     | 877978  | 214  | 35  | 598792   | 238520  | 0 | 1  | 0  | 0 | 50 | 53  | 19748388 | 7.87E-01 | 1 |
| CROCC    | 681579  | 247  | 45  | 4993256  | 1628344 | 0 | 9  | 2  | 0 | 10 | 10  | 6451432  | 7.87E-01 | 1 |
| PRAMEF2C | NaN     | NaN  | NaN | 2387336  | 697048  | 0 | 6  | 3  | 0 | 50 | 119 | 40342632 | 7.87E-01 | 1 |
| CREBZF   | 325720  | 554  | -19 | 849772   | 287648  | 0 | 3  | 0  | 0 | 10 | 19  | 5029568  | 7.87E-01 | 1 |
| TM4SF1   | 529009  | 254  | 8   | 517980   | 149520  | 0 | 1  | 0  | 0 | 50 | 86  | 27295232 | 7.87E-01 | 1 |
| CH25H    | 255590  | 367  | 34  | 670704   | 206124  | 0 | 1  | 0  | 0 | 50 | 45  | 17350016 | 7.87E-01 | 1 |
| CNN2     | 2387949 | 206  | 26  | 799932   | 218940  | 0 | 3  | 2  | 0 | 2  | 9   | 2446076  | 7.87E-01 | 1 |
| TUBGCP6  | 944000  | 242  | 49  | 4546120  | 1389824 | 0 | 9  | 4  | 0 | 33 | 52  | 17836668 | 7.87E-01 | 1 |
| FAM129A  | 349492  | 479  | 3   | 2394100  | 637952  | 0 | 7  | 1  | 0 | 5  | 8   | 3103964  | 7.87E-01 | 1 |
| KCNK5    | 181911  | 634  | 29  | 1246712  | 372376  | 0 | 5  | 0  | 0 | 8  | 9   | 2528668  | 7.87E-01 | 1 |
| XIRP2    | 7405    | 1014 | -18 | 10391284 | 2674628 | 0 | 47 | 15 | 0 | 13 | 24  | 6259548  | 7.88E-01 | 1 |
| TMEM102  | 1906324 | 206  | 33  | 1205772  | 433608  | 0 | 2  | 0  | 0 | 8  | 11  | 3438248  | 7.88E-01 | 1 |
| ZNF398   | 611542  | 254  | 24  | 1610544  | 470988  | 0 | 4  | 1  | 0 | 13 | 15  | 5571400  | 7.88E-01 | 1 |
| TNN      | 169074  | 612  | 14  | 3316140  | 925956  | 0 | 16 | 5  | 0 | 5  | 7   | 2198300  | 7.88E-01 | 1 |
| FMO1     | 427825  | 968  | -4  | 1369888  | 372020  | 0 | 2  | 2  | 0 | 50 | 76  | 22201584 | 7.88E-01 | 1 |
| SLITRK6  | 18898   | 822  | -27 | 2110724  | 591316  | 0 | 8  | 1  | 0 | 40 | 83  | 18266004 | 7.88E-01 | 1 |
| PKIG     | 791812  | 171  | 44  | 199360   | 55892   | 0 | 1  | 1  | 0 | 3  | 4   | 684588   | 7.88E-01 | 1 |
| PDCD7    | 678641  | 189  | 61  | 1176224  | 400144  | 0 | 3  | 0  | 0 | 8  | 6   | 2592748  | 7.88E-01 | 1 |
| EFS      | 1220624 | 456  | 31  | 1341052  | 480956  | 0 | 5  | 1  | 0 | 6  | 13  | 4269864  | 7.88E-01 | 1 |
| ACTN3    | 1343990 | 194  | 62  | 2334648  | 642936  | 0 | 6  | 1  | 0 | 13 | 11  | 5250288  | 7.88E-01 | 1 |
| OR56B1   | 139577  | 922  | 2   | 794236   | 247064  | 0 | 1  | 1  | 0 | 50 | 48  | 17113632 | 7.88E-01 | 1 |
| LDHD     | 681970  | 162  | 22  | 1270208  | 402280  | 0 | 2  | 2  | 0 | 50 | 55  | 23748760 | 7.88E-01 | 1 |
| CNTN6    | 6599    | 831  | -23 | 2673560  | 717340  | 0 | 8  | 5  | 0 | 50 | 73  | 18765828 | 7.88E-01 | 1 |
| TNFAIP3  | 315946  | 256  | 51  | 2029556  | 538984  | 0 | 5  | 2  | 0 | 50 | 51  | 19565404 | 7.88E-01 | 1 |
| MPZL2    | 805791  | 211  | 41  | 556784   | 156640  | 0 | 1  | 0  | 0 | 50 | 62  | 21266728 | 7.89E-01 | 1 |

|          |         |     |     |         |         |   |    |   |   |    |     |          |          |   |
|----------|---------|-----|-----|---------|---------|---|----|---|---|----|-----|----------|----------|---|
| PCYOX1L  | 422727  | 380 | 28  | 1238524 | 370952  | 0 | 3  | 1 | 0 | 15 | 16  | 5771116  | 7.89E-01 | 1 |
| SPON2    | 789524  | 319 | 29  | 826276  | 258812  | 0 | 1  | 0 | 0 | 50 | 39  | 20243228 | 7.89E-01 | 1 |
| CDK2     | 2080397 | 229 | 31  | 757212  | 226416  | 0 | 1  | 0 | 0 | 11 | 12  | 5452140  | 7.89E-01 | 1 |
| SCML4    | 294918  | 581 | 36  | 1045216 | 314348  | 0 | 2  | 2 | 0 | 10 | 9   | 3850140  | 7.89E-01 | 1 |
| ZKSCAN4  | 273319  | 502 | 35  | 1392672 | 373800  | 0 | 2  | 0 | 0 | 11 | 6   | 3929884  | 7.89E-01 | 1 |
| APPBP2   | 372707  | 242 | 7   | 1535072 | 393736  | 0 | 1  | 1 | 0 | 50 | 54  | 22426576 | 7.89E-01 | 1 |
| MRPL3    | 276806  | 843 | 15  | 909936  | 246708  | 0 | 2  | 1 | 0 | 50 | 51  | 17071624 | 7.89E-01 | 1 |
| MEM120A  | 1072825 | 218 | 49  | 913852  | 235316  | 0 | 2  | 0 | 0 | 50 | 64  | 21496704 | 7.89E-01 | 1 |
| IPSNAP3A | 194451  | 718 | -21 | 644004  | 171948  | 0 | 2  | 0 | 0 | 50 | 93  | 21652988 | 7.89E-01 | 1 |
| FXYD3    | 745516  | 357 | -9  | 535068  | 144180  | 0 | 1  | 0 | 0 | 50 | 54  | 17856960 | 7.89E-01 | 1 |
| SUN2     | 1291659 | 272 | 73  | 1828416 | 544680  | 0 | 2  | 2 | 0 | 50 | 42  | 16818864 | 7.89E-01 | 1 |
| NAAA     | 483325  | 429 | 44  | 929872  | 273764  | 0 | 2  | 0 | 0 | 50 | 72  | 24127900 | 7.89E-01 | 1 |
| DCXR     | 3814891 | 211 | 28  | 620864  | 198292  | 0 | 1  | 0 | 0 | 32 | 25  | 10015348 | 7.89E-01 | 1 |
| FBLIM1   | 752403  | 174 | 29  | 1133148 | 343896  | 0 | 2  | 1 | 0 | 50 | 55  | 22856980 | 7.89E-01 | 1 |
| NES      | 1851672 | 180 | 37  | 3974384 | 1235320 | 0 | 15 | 7 | 0 | 50 | 84  | 23475352 | 7.89E-01 | 1 |
| ZNF532   | 352047  | 299 | 51  | 3271640 | 934144  | 0 | 10 | 3 | 0 | 50 | 52  | 19357856 | 7.89E-01 | 1 |
| OR11H4   | 371637  | 528 | -29 | 794948  | 245284  | 0 | 2  | 0 | 0 | 50 | 73  | 20208696 | 7.89E-01 | 1 |
| ZNFX1    | 886628  | 261 | 50  | 4885388 | 1318624 | 0 | 17 | 4 | 0 | 50 | 75  | 24073432 | 7.89E-01 | 1 |
| PBK      | 406636  | 229 | 23  | 853688  | 211108  | 0 | 1  | 0 | 0 | 50 | 46  | 20251772 | 7.90E-01 | 1 |
| PAXIP1   | 162706  | 628 | -6  | 2795312 | 720544  | 0 | 6  | 0 | 0 | 50 | 53  | 26297008 | 7.90E-01 | 1 |
| PPA1     | 458949  | 217 | 39  | 790320  | 181560  | 0 | 1  | 0 | 0 | 50 | 34  | 16665428 | 7.90E-01 | 1 |
| AGK      | 227799  | 887 | 16  | 1119264 | 300108  | 0 | 1  | 1 | 0 | 50 | 80  | 24757308 | 7.90E-01 | 1 |
| IPO5     | 496805  | 532 | 2   | 2945544 | 745464  | 0 | 6  | 2 | 0 | 46 | 69  | 21303396 | 7.90E-01 | 1 |
| PRPH2    | 975176  | 194 | 36  | 874692  | 245640  | 0 | 2  | 1 | 0 | 50 | 75  | 23617396 | 7.90E-01 | 1 |
| SYAP1    | 295989  | NaN | 32  | 936636  | 228552  | 0 | 2  | 0 | 0 | 37 | 50  | 16971232 | 7.90E-01 | 1 |
| C5orf38  | 18983   | 986 | -29 | 342828  | 115344  | 0 | 1  | 0 | 0 | 50 | 109 | 22870864 | 7.90E-01 | 1 |
| CGB8     | 2070141 | 200 | 35  | 404416  | 138128  | 0 | 1  | 0 | 0 | 50 | 68  | 18142828 | 7.90E-01 | 1 |
| GAS2L3   | 197479  | 849 | -12 | 1749740 | 513352  | 0 | 3  | 0 | 0 | 6  | 4   | 2122472  | 7.90E-01 | 1 |
| DCTN3    | 731413  | 298 | 51  | 576720  | 153792  | 0 | 1  | 1 | 0 | 50 | 42  | 16261368 | 7.90E-01 | 1 |
| ICAM4    | 1729517 | 200 | 31  | 830904  | 152724  | 0 | 1  | 0 | 0 | 50 | 94  | 24020032 | 7.90E-01 | 1 |
| SLC25A11 | 1416161 | 231 | 30  | 793880  | 245284  | 0 | 2  | 0 | 0 | 50 | 65  | 18681100 | 7.90E-01 | 1 |
| DNAJC10  | 332624  | 421 | 7   | 2120692 | 512996  | 0 | 6  | 1 | 0 | 50 | 48  | 17749448 | 7.90E-01 | 1 |
| INTS7    | 469325  | 370 | 16  | 2487016 | 679604  | 0 | 8  | 1 | 0 | 11 | 14  | 4679620  | 7.90E-01 | 1 |



|          |         |     |     |         |         |   |    |   |   |    |    |          |          |   |
|----------|---------|-----|-----|---------|---------|---|----|---|---|----|----|----------|----------|---|
| CDH3     | 777628  | 299 | 24  | 2110724 | 612676  | 0 | 6  | 4 | 0 | 17 | 33 | 11530484 | 7.90E-01 | 1 |
| ITGA1    | 173759  | 379 | 9   | 3077620 | 824852  | 0 | 9  | 0 | 0 | 2  | 2  | 1306876  | 7.90E-01 | 1 |
| ANKRD12  | 434324  | 391 | 56  | 5348188 | 1312928 | 0 | 18 | 2 | 0 | 10 | 13 | 4568548  | 7.90E-01 | 1 |
| TEDDM1   | 349818  | 783 | 5   | 678892  | 199004  | 0 | 2  | 2 | 0 | 10 | 16 | 4089728  | 7.91E-01 | 1 |
| NCAN     | 940952  | 232 | 17  | 3294424 | 1001072 | 0 | 10 | 2 | 0 | 3  | 3  | 1638312  | 7.91E-01 | 1 |
| RSPO1    | 445248  | 274 | 29  | 677468  | 185476  | 0 | 1  | 0 | 0 | 50 | 53 | 22093004 | 7.91E-01 | 1 |
| ARSK     | 310860  | 359 | 29  | 1385908 | 364544  | 0 | 2  | 1 | 0 | 50 | 36 | 19058104 | 7.91E-01 | 1 |
| ACTL6B   | 1884430 | 247 | 60  | 1117484 | 306160  | 0 | 6  | 3 | 0 | 3  | 8  | 1530800  | 7.91E-01 | 1 |
| NUDT19   | 420201  | 410 | -36 | 916344  | 296904  | 0 | 1  | 1 | 0 | 50 | 81 | 19347176 | 7.91E-01 | 1 |
| ZNF653   | 1204183 | 265 | 32  | 1547888 | 459952  | 0 | 4  | 1 | 0 | 50 | 53 | 17472836 | 7.91E-01 | 1 |
| ITPKC    | 1127178 | 201 | 27  | 1712004 | 507300  | 0 | 5  | 3 | 0 | 30 | 43 | 10578184 | 7.91E-01 | 1 |
| STAB1    | 1114087 | 192 | 48  | 6623380 | 1908872 | 0 | 17 | 4 | 0 | 13 | 15 | 5893224  | 7.91E-01 | 1 |
| FKBP11   | 1737773 | 214 | 55  | 559632  | 169812  | 0 | 1  | 0 | 0 | 50 | 50 | 18572876 | 7.91E-01 | 1 |
| AGPAT3   | 842264  | 294 | 67  | 966184  | 275900  | 0 | 3  | 2 | 0 | 18 | 28 | 7699924  | 7.91E-01 | 1 |
| TMEM80   | 1781290 | 193 | 53  | 421148  | 139552  | 0 | 1  | 1 | 0 | 8  | 9  | 2748676  | 7.91E-01 | 1 |
| VLDLR    | 192846  | 541 | -1  | 2310796 | 566396  | 0 | 5  | 0 | 0 | 17 | 14 | 6986500  | 7.91E-01 | 1 |
| LTB4R2   | 915114  | 220 | 38  | 838380  | 328944  | 0 | 2  | 1 | 0 | 50 | 69 | 21077692 | 7.91E-01 | 1 |
| C19orf45 | 609287  | 308 | 36  | 1278752 | 378784  | 0 | 3  | 2 | 0 | 23 | 22 | 8935600  | 7.91E-01 | 1 |
| NINJ2    | 456582  | 197 | 40  | 470988  | 149520  | 0 | 1  | 1 | 0 | 34 | 39 | 11902148 | 7.91E-01 | 1 |
| NR3C2    | 73880   | 914 | -15 | 2483456 | 706660  | 0 | 5  | 2 | 0 | 31 | 37 | 12881148 | 7.91E-01 | 1 |
| ADAMTS2  | 126632  | 906 | -21 | 5032416 | 1251696 | 0 | 16 | 2 | 0 | 3  | 6  | 2747252  | 7.92E-01 | 1 |
| HAUS5    | 1162794 | 390 | 27  | 1604848 | 505520  | 0 | 5  | 3 | 0 | 50 | 66 | 20625572 | 7.92E-01 | 1 |
| YIF1B    | 1438746 | 253 | -1  | 885728  | 264508  | 0 | 2  | 0 | 0 | 17 | 15 | 5386992  | 7.92E-01 | 1 |
| SFMBT1   | 1008757 | 282 | 50  | 2264872 | 594164  | 0 | 3  | 1 | 0 | 50 | 62 | 19950240 | 7.92E-01 | 1 |
| GNB5     | 540700  | 195 | 21  | 1048064 | 274120  | 0 | 2  | 0 | 0 | 50 | 45 | 18900752 | 7.92E-01 | 1 |
| EIF4A1   | 1957426 | 194 | 24  | 1063728 | 284088  | 0 | 4  | 1 | 0 | 50 | 81 | 21975524 | 7.92E-01 | 1 |
| KIAA1919 | 364757  | 424 | 30  | 1289788 | 385904  | 0 | 2  | 0 | 0 | 50 | 52 | 24685396 | 7.92E-01 | 1 |
| EEF1B2   | 332753  | 487 | 25  | 605556  | 150588  | 0 | 1  | 0 | 0 | 50 | 57 | 21975880 | 7.92E-01 | 1 |
| HIF1A    | 252998  | 315 | 30  | 2157716 | 551800  | 0 | 4  | 3 | 0 | 50 | 50 | 17520540 | 7.92E-01 | 1 |
| ZNF564   | 2026532 | 472 | -13 | 1440020 | 347812  | 0 | 4  | 1 | 0 | 50 | 70 | 21595672 | 7.92E-01 | 1 |
| FAM19A5  | 11714   | 952 | -88 | 414740  | 123532  | 0 | 1  | 0 | 0 | 50 | 77 | 15919252 | 7.92E-01 | 1 |
| ZNF296   | 1135715 | 208 | 25  | 1172664 | 365256  | 0 | 4  | 1 | 0 | 20 | 33 | 8378460  | 7.92E-01 | 1 |
| PNMAL1   | 1099113 | 393 | 25  | 1121044 | 320756  | 0 | 6  | 3 | 0 | 2  | 8  | 1231404  | 7.92E-01 | 1 |

|          |         |     |     |         |         |   |    |   |   |    |    |          |          |   |
|----------|---------|-----|-----|---------|---------|---|----|---|---|----|----|----------|----------|---|
| MRAP2    | 54672   | 813 | -16 | 532220  | 140620  | 0 | 1  | 0 | 0 | 50 | 75 | 25182728 | 7.92E-01 | 1 |
| TMPRSS5  | 124189  | 613 | 12  | 1175512 | 343184  | 0 | 1  | 0 | 0 | 50 | 69 | 22012192 | 7.92E-01 | 1 |
| TRIM7    | 1034999 | 415 | 35  | 1363836 | 432540  | 0 | 5  | 1 | 0 | 15 | 19 | 5268088  | 7.92E-01 | 1 |
| IGFBP6   | 1726226 | 177 | 38  | 590248  | 196868  | 0 | 1  | 0 | 0 | 26 | 39 | 13050248 | 7.92E-01 | 1 |
| HNRNPL   | 1989663 | 219 | 30  | 1514424 | 429336  | 0 | 4  | 1 | 0 | 50 | 70 | 21843448 | 7.92E-01 | 1 |
| TSPYL5   | 387608  | 610 | -13 | 1019228 | 320044  | 0 | 1  | 0 | 0 | 23 | 8  | 6292300  | 7.93E-01 | 1 |
| SCARB1   | 1090766 | 206 | 35  | 1420796 | 392668  | 0 | 2  | 1 | 0 | 50 | 46 | 16572512 | 7.93E-01 | 1 |
| INSIG1   | 263493  | NaN | 14  | 863656  | 222500  | 0 | 3  | 3 | 0 | 7  | 10 | 1883952  | 7.93E-01 | 1 |
| LDLRAD1  | 430138  | 201 | 31  | 537916  | 145604  | 0 | 1  | 0 | 0 | 50 | 52 | 17828480 | 7.93E-01 | 1 |
| ZNF7     | 1454261 | 384 | 20  | 1773236 | 447136  | 0 | 4  | 1 | 0 | 19 | 57 | 13071252 | 7.93E-01 | 1 |
| CYB5D2   | 753798  | 357 | 30  | 656108  | 205768  | 0 | 1  | 0 | 0 | 50 | 58 | 21286664 | 7.93E-01 | 1 |
| TLE3     | 300053  | 417 | 28  | 1999652 | 558208  | 0 | 4  | 1 | 0 | 50 | 54 | 24344348 | 7.93E-01 | 1 |
| CTTN     | 511118  | 530 | 43  | 1807056 | 464580  | 0 | 9  | 5 | 0 | 7  | 11 | 2601292  | 7.93E-01 | 1 |
| RFPL2    | 462468  | 580 | -25 | 1021364 | 295480  | 0 | 2  | 1 | 0 | 50 | 53 | 18796088 | 7.93E-01 | 1 |
| DGAT2L6  | 163833  | NaN | 14  | 865792  | 244928  | 0 | 2  | 0 | 0 | 50 | 62 | 22960220 | 7.93E-01 | 1 |
| NEDD1    | 51429   | 882 | -6  | 1746536 | 457816  | 0 | 2  | 0 | 0 | 50 | 68 | 24674004 | 7.93E-01 | 1 |
| YLPM1    | 878419  | 232 | 43  | 5410132 | 1554296 | 0 | 10 | 3 | 0 | 50 | 66 | 24386356 | 7.93E-01 | 1 |
| TADA2B   | 459652  | 426 | 70  | 1053048 | 300108  | 0 | 3  | 1 | 0 | 50 | 67 | 19324392 | 7.93E-01 | 1 |
| C15orf57 | 892776  | 192 | 48  | 508724  | 133144  | 0 | 1  | 0 | 0 | 50 | 76 | 24292372 | 7.93E-01 | 1 |
| KIF16B   | 108352  | 867 | -26 | 3447860 | 881812  | 0 | 11 | 4 | 0 | 50 | 71 | 17734140 | 7.93E-01 | 1 |
| PMS1     | 424679  | 385 | 20  | 2436464 | 604132  | 0 | 5  | 1 | 0 | 34 | 29 | 14533344 | 7.94E-01 | 1 |
| GSPT2    | 126151  | NaN | 16  | 1567824 | 447492  | 0 | 4  | 2 | 0 | 50 | 76 | 24196608 | 7.94E-01 | 1 |
| OR10H5   | 808269  | 590 | 18  | 766468  | 244928  | 0 | 2  | 1 | 0 | 41 | 68 | 19792888 | 7.94E-01 | 1 |
| LPIN1    | 219334  | 431 | 19  | 2307236 | 628696  | 0 | 7  | 3 | 0 | 14 | 11 | 4836972  | 7.94E-01 | 1 |
| AKR1B10  | 403585  | 319 | 21  | 838736  | 215380  | 0 | 1  | 1 | 0 | 50 | 49 | 23084464 | 7.94E-01 | 1 |
| SLC30A8  | 496501  | 456 | 8   | 960844  | 263084  | 0 | 3  | 3 | 0 | 7  | 8  | 2802432  | 7.94E-01 | 1 |
| PLB1     | 478034  | 172 | 32  | 3913508 | 1042012 | 0 | 12 | 2 | 0 | 33 | 36 | 11939884 | 7.94E-01 | 1 |
| ACADL    | 190249  | 696 | 2   | 1121400 | 302244  | 0 | 2  | 0 | 0 | 40 | 45 | 17502384 | 7.94E-01 | 1 |
| ZBTB7A   | 2296242 | 207 | 29  | 1428272 | 454612  | 0 | 5  | 3 | 0 | 3  | 5  | 1522612  | 7.94E-01 | 1 |
| NPTX1    | 755391  | 222 | 23  | 1075476 | 328944  | 0 | 3  | 2 | 0 | 50 | 66 | 22712088 | 7.94E-01 | 1 |
| ANXA13   | 492587  | 192 | 12  | 948384  | 247776  | 0 | 3  | 3 | 0 | 7  | 12 | 2382708  | 7.94E-01 | 1 |
| RRM1     | 392720  | 601 | 31  | 2084736 | 532932  | 0 | 4  | 0 | 0 | 37 | 37 | 20111508 | 7.94E-01 | 1 |
| SHROOM3  | 570950  | 418 | 17  | 4902476 | 1538632 | 0 | 18 | 5 | 0 | 2  | 7  | 2471708  | 7.94E-01 | 1 |

|          |         |      |     |          |         |   |    |   |   |    |    |          |          |   |
|----------|---------|------|-----|----------|---------|---|----|---|---|----|----|----------|----------|---|
| ANAPC7   | 964525  | 206  | 50  | 1551804  | 416520  | 0 | 5  | 1 | 0 | 50 | 64 | 19341480 | 7.94E-01 | 1 |
| SNTA1    | 539120  | 237  | 49  | 1236744  | 414384  | 0 | 3  | 3 | 0 | 34 | 37 | 12806388 | 7.94E-01 | 1 |
| IP6K2    | 1646019 | 212  | 45  | 1572096  | 425064  | 0 | 2  | 0 | 0 | 5  | 3  | 2853696  | 7.94E-01 | 1 |
| SLIT1    | 1008851 | 470  | 26  | 3966552  | 1105380 | 0 | 10 | 4 | 0 | 6  | 8  | 4075132  | 7.94E-01 | 1 |
| FAM122C  | 293030  | NaN  | 27  | 986476   | 264152  | 0 | 2  | 1 | 0 | 50 | 78 | 26755892 | 7.94E-01 | 1 |
| KIAA0195 | 1928925 | 195  | 19  | 3457116  | 1018872 | 0 | 6  | 4 | 0 | 22 | 30 | 10939524 | 7.94E-01 | 1 |
| PGRMC2   | 277451  | 189  | 8   | 610184   | 192952  | 0 | 1  | 0 | 0 | 50 | 49 | 18995804 | 7.94E-01 | 1 |
| DHX57    | 850010  | 297  | 25  | 3563204  | 979000  | 0 | 9  | 2 | 0 | 25 | 28 | 12292680 | 7.95E-01 | 1 |
| VHLL     | 2266205 | 211  | 33  | 342116   | 106444  | 0 | 1  | 1 | 0 | 6  | 7  | 1890360  | 7.95E-01 | 1 |
| NLRP8    | 802494  | 561  | -68 | 2671068  | 730512  | 0 | 17 | 6 | 0 | 6  | 24 | 4383072  | 7.95E-01 | 1 |
| CATSPERC | 1467279 | 253  | 0   | 3036324  | 799932  | 0 | 8  | 0 | 0 | 0  | 0  | 799932   | 7.95E-01 | 1 |
| DOCK7    | 222018  | 474  | 4   | 5507676  | 1459956 | 0 | 15 | 2 | 0 | 10 | 11 | 6439684  | 7.95E-01 | 1 |
| VWC2L    | 52906   | 1018 | -1  | 585264   | 142044  | 0 | 1  | 0 | 0 | 50 | 75 | 22628784 | 7.95E-01 | 1 |
| HLA-G    | 514408  | 685  | 38  | 862588   | 249200  | 0 | 2  | 1 | 0 | 26 | 31 | 10504136 | 7.95E-01 | 1 |
| VCAN     | 253331  | 529  | 0   | 8485616  | 2458180 | 0 | 31 | 7 | 0 | 2  | 7  | 2961208  | 7.95E-01 | 1 |
| CLDN16   | 163494  | 373  | 9   | 772520   | 224992  | 0 | 2  | 1 | 0 | 50 | 75 | 20810692 | 7.95E-01 | 1 |
| CSRP1    | 842013  | 209  | 26  | 521896   | 134924  | 0 | 1  | 0 | 0 | 50 | 52 | 17165964 | 7.95E-01 | 1 |
| MET      | 558228  | 262  | 2   | 3613400  | 986476  | 0 | 16 | 6 | 0 | 33 | 52 | 14315472 | 7.95E-01 | 1 |
| NUDT6    | 126682  | 414  | 19  | 799932   | 234960  | 0 | 2  | 2 | 0 | 3  | 6  | 2385200  | 7.95E-01 | 1 |
| AASS     | 57655   | 988  | -13 | 2417952  | 650412  | 0 | 8  | 2 | 0 | 16 | 33 | 9643684  | 7.95E-01 | 1 |
| GLP1R    | 188770  | 730  | 34  | 1203280  | 336776  | 0 | 3  | 1 | 0 | 50 | 57 | 20964484 | 7.95E-01 | 1 |
| ZNF385B  | 65074   | 927  | -3  | 1227488  | 347812  | 0 | 2  | 3 | 0 | 50 | 85 | 21890440 | 7.95E-01 | 1 |
| FNDC8    | 516190  | 504  | 23  | 819868   | 236384  | 0 | 2  | 1 | 0 | 43 | 54 | 16171300 | 7.95E-01 | 1 |
| CTLA4    | 148748  | 632  | 18  | 582060   | 148452  | 0 | 1  | 1 | 0 | 50 | 50 | 16978352 | 7.95E-01 | 1 |
| DPPA2    | 22565   | 1096 | -19 | 791388   | 200784  | 0 | 2  | 1 | 0 | 50 | 68 | 19038524 | 7.95E-01 | 1 |
| CPOX     | 364371  | 640  | 6   | 1146320  | 337132  | 0 | 4  | 1 | 0 | 50 | 71 | 19922472 | 7.95E-01 | 1 |
| LAP3     | 271232  | 912  | 35  | 1344612  | 372732  | 0 | 3  | 1 | 0 | 50 | 51 | 18233608 | 7.96E-01 | 1 |
| RIPK2    | 251042  | 447  | 5   | 1408336  | 367748  | 0 | 6  | 0 | 0 | 1  | 0  | 559276   | 7.96E-01 | 1 |
| EAF1     | 507426  | 256  | 49  | 696692   | 186544  | 0 | 1  | 0 | 0 | 50 | 44 | 18728804 | 7.96E-01 | 1 |
| HS3ST4   | 36636   | 1012 | -35 | 1111076  | 357424  | 0 | 3  | 1 | 0 | 18 | 50 | 9866896  | 7.96E-01 | 1 |
| HERC1    | 706823  | 369  | 40  | 12359964 | 3546828 | 0 | 24 | 7 | 0 | 17 | 25 | 11701720 | 7.96E-01 | 1 |
| TRPV1    | 472939  | 354  | 9   | 1877544  | 528660  | 0 | 4  | 4 | 0 | 9  | 16 | 4275560  | 7.96E-01 | 1 |
| EDEM2    | 1346435 | 168  | 46  | 1482028  | 420080  | 0 | 5  | 4 | 0 | 17 | 32 | 7653644  | 7.96E-01 | 1 |

|          |         |     |     |         |         |   |    |   |   |    |    |          |          |   |
|----------|---------|-----|-----|---------|---------|---|----|---|---|----|----|----------|----------|---|
| SPATA7   | 140042  | 800 | -13 | 1571028 | 400500  | 0 | 7  | 2 | 0 | 2  | 20 | 4075488  | 7.96E-01 | 1 |
| HSPA12B  | 860065  | 241 | 43  | 1711648 | 540764  | 0 | 4  | 2 | 0 | 50 | 63 | 24054564 | 7.96E-01 | 1 |
| KIAA1279 | 860888  | 246 | 52  | 1590608 | 427912  | 0 | 5  | 2 | 0 | 50 | 61 | 18490996 | 7.96E-01 | 1 |
| KLK13    | 490795  | 632 | 22  | 693488  | 216448  | 0 | 3  | 2 | 0 | 5  | 7  | 1231048  | 7.96E-01 | 1 |
| CHKB     | 1073094 | 203 | 43  | 1027772 | 283732  | 0 | 4  | 2 | 0 | 2  | 5  | 1253120  | 7.96E-01 | 1 |
| GOLGA1   | 1116965 | 142 | 30  | 2037032 | 509080  | 0 | 9  | 2 | 0 | 34 | 48 | 11748356 | 7.96E-01 | 1 |
| ZNF570   | 234564  | 939 | -52 | 1404776 | 332860  | 0 | 4  | 1 | 0 | 50 | 52 | 17537628 | 7.96E-01 | 1 |
| CACNG8   | 813774  | 360 | -33 | 1022788 | 358136  | 0 | 3  | 2 | 0 | 50 | 87 | 22426932 | 7.97E-01 | 1 |
| SYNPO2L  | 1042853 | 166 | 43  | 2403712 | 853688  | 0 | 4  | 1 | 0 | 13 | 21 | 9192988  | 7.97E-01 | 1 |
| PIP4K2B  | 1198833 | 207 | 37  | 1094700 | 279816  | 0 | 2  | 1 | 0 | 50 | 46 | 18180920 | 7.97E-01 | 1 |
| DOK4     | 771506  | 159 | 45  | 844788  | 232824  | 0 | 2  | 1 | 0 | 50 | 64 | 18678964 | 7.97E-01 | 1 |
| RNF167   | 1416161 | 231 | 30  | 889644  | 269136  | 0 | 2  | 0 | 0 | 50 | 65 | 18681100 | 7.97E-01 | 1 |
| LATS2    | 446900  | 192 | 41  | 2707736 | 807052  | 0 | 6  | 3 | 0 | 50 | 49 | 17570024 | 7.97E-01 | 1 |
| PSMA7    | 861466  | 288 | -13 | 645072  | 178356  | 0 | 1  | 2 | 0 | 15 | 16 | 4860112  | 7.97E-01 | 1 |
| GORASP1  | 213514  | 500 | 30  | 1108228 | 341048  | 0 | 2  | 1 | 0 | 50 | 57 | 21099764 | 7.97E-01 | 1 |
| MYOG     | 430455  | 453 | 42  | 559632  | 169812  | 0 | 1  | 1 | 0 | 30 | 34 | 12036716 | 7.97E-01 | 1 |
| FAM178A  | 1007780 | 247 | 35  | 3098980 | 823784  | 0 | 8  | 2 | 0 | 21 | 22 | 9378464  | 7.97E-01 | 1 |
| PDXDC1   | 535071  | 214 | 23  | 2060172 | 561768  | 0 | 5  | 4 | 0 | 10 | 13 | 4468868  | 7.97E-01 | 1 |
| ZNF174   | 1361831 | 303 | 29  | 1104312 | 301176  | 0 | 3  | 1 | 0 | 50 | 74 | 21539424 | 7.97E-01 | 1 |
| TXNRD1   | 1237281 | 168 | 29  | 1695272 | 470632  | 0 | 5  | 0 | 0 | 1  | 1  | 930584   | 7.97E-01 | 1 |
| PIK3C2B  | 482894  | 188 | 34  | 4172676 | 1202568 | 0 | 10 | 7 | 0 | 20 | 34 | 9024600  | 7.97E-01 | 1 |
| SEC23A   | 314158  | 376 | -7  | 1996448 | 538984  | 0 | 5  | 1 | 0 | 6  | 7  | 2698480  | 7.97E-01 | 1 |
| FGFR2    | 204200  | 386 | -9  | 2336428 | 634748  | 0 | 11 | 4 | 0 | 3  | 6  | 1945540  | 7.97E-01 | 1 |
| RBKS     | 933934  | 279 | 32  | 828768  | 238164  | 0 | 2  | 1 | 0 | 50 | 70 | 20114356 | 7.97E-01 | 1 |
| HTR2A    | 129425  | 885 | 34  | 1328948 | 364900  | 0 | 3  | 2 | 0 | 50 | 73 | 23908248 | 7.97E-01 | 1 |
| OPRK1    | 147912  | 861 | -14 | 954436  | 279104  | 0 | 4  | 2 | 0 | 2  | 5  | 1555364  | 7.97E-01 | 1 |
| FAM63A   | 1621279 | 172 | 30  | 1319692 | 382700  | 0 | 5  | 2 | 0 | 33 | 60 | 14315472 | 7.97E-01 | 1 |
| RNF207   | 627248  | 240 | 31  | 1635108 | 469920  | 0 | 3  | 1 | 0 | 50 | 61 | 18409472 | 7.97E-01 | 1 |
| SH3GLB1  | 315130  | 393 | -12 | 958352  | 248488  | 0 | 1  | 1 | 0 | 50 | 32 | 18801072 | 7.97E-01 | 1 |
| NMNAT3   | 224111  | 848 | 9   | 552512  | 152368  | 0 | 1  | 0 | 0 | 50 | 55 | 19046356 | 7.97E-01 | 1 |
| TEAD1    | 339042  | 432 | -1  | 1129232 | 285868  | 0 | 2  | 1 | 0 | 50 | 57 | 21442592 | 7.97E-01 | 1 |
| RBM41    | 226335  | NaN | 39  | 1084020 | 277680  | 0 | 1  | 1 | 0 | 50 | 62 | 18781848 | 7.98E-01 | 1 |
| PRPSAP2  | 792064  | 224 | 1   | 967964  | 260236  | 0 | 2  | 1 | 0 | 50 | 72 | 20640524 | 7.98E-01 | 1 |

|          |         |      |     |         |         |   |    |   |   |    |    |          |          |   |
|----------|---------|------|-----|---------|---------|---|----|---|---|----|----|----------|----------|---|
| CCNB1    | 420987  | 273  | 30  | 1109652 | 315060  | 0 | 3  | 1 | 0 | 30 | 42 | 14095108 | 7.98E-01 | 1 |
| SLFN13   | 763419  | 456  | 18  | 2273416 | 620864  | 0 | 5  | 3 | 0 | 50 | 58 | 19205844 | 7.98E-01 | 1 |
| BCAT2    | 1700740 | 181  | 39  | 1006412 | 297616  | 0 | 2  | 1 | 0 | 44 | 58 | 19937068 | 7.98E-01 | 1 |
| HSDL2    | 458381  | 341  | 17  | 1110364 | 276968  | 0 | 3  | 1 | 0 | 50 | 62 | 19477828 | 7.98E-01 | 1 |
| DHX32    | 206845  | 738  | -4  | 1927384 | 499112  | 0 | 6  | 0 | 0 | 11 | 10 | 4561784  | 7.98E-01 | 1 |
| NUDT22   | 1602391 | 278  | 57  | 745108  | 252404  | 0 | 3  | 3 | 0 | 9  | 21 | 4572108  | 7.98E-01 | 1 |
| MEN1     | 2261775 | 230  | 61  | 1530800 | 481312  | 0 | 3  | 4 | 0 | 15 | 29 | 8712388  | 7.98E-01 | 1 |
| RNF40    | 1632278 | 158  | 61  | 2545400 | 746176  | 0 | 5  | 3 | 0 | 47 | 62 | 18440088 | 7.98E-01 | 1 |
| SNTG1    | 2777    | 1189 | -32 | 1374872 | 359560  | 0 | 5  | 4 | 0 | 10 | 25 | 4036684  | 7.98E-01 | 1 |
| MMP15    | 856192  | 158  | 9   | 1675336 | 509792  | 0 | 4  | 1 | 0 | 50 | 56 | 19314424 | 7.98E-01 | 1 |
| ZNF134   | 532349  | 849  | -37 | 1108940 | 270916  | 0 | 3  | 1 | 0 | 50 | 57 | 17028192 | 7.98E-01 | 1 |
| EPHX1    | 925960  | 168  | 8   | 1177292 | 317908  | 0 | 2  | 0 | 0 | 50 | 49 | 18850556 | 7.98E-01 | 1 |
| PKN3     | 1865107 | 197  | 38  | 2240308 | 700964  | 0 | 2  | 4 | 0 | 50 | 70 | 23922844 | 7.98E-01 | 1 |
| SLC7A2   | 462453  | 253  | 2   | 1883240 | 556072  | 0 | 3  | 1 | 0 | 50 | 67 | 23716720 | 7.98E-01 | 1 |
| GABBR1   | 443970  | 755  | 26  | 2568896 | 757924  | 0 | 6  | 3 | 0 | 8  | 16 | 4473496  | 7.98E-01 | 1 |
| OAZ3     | 1062482 | 255  | 29  | 715204  | 206480  | 0 | 1  | 0 | 0 | 50 | 50 | 22423016 | 7.98E-01 | 1 |
| A4GNT    | 190056  | 464  | 9   | 863300  | 237808  | 0 | 2  | 2 | 0 | 14 | 15 | 5086528  | 7.99E-01 | 1 |
| VIP      | 188249  | 600  | -9  | 457104  | 116412  | 0 | 1  | 1 | 0 | 5  | 9  | 1360988  | 7.99E-01 | 1 |
| DMWD     | 929036  | 203  | 43  | 1625140 | 556784  | 0 | 4  | 2 | 0 | 33 | 37 | 14234660 | 7.99E-01 | 1 |
| HABP4    | 354931  | 349  | 36  | 1050556 | 305804  | 0 | 1  | 0 | 0 | 12 | 9  | 5079764  | 7.99E-01 | 1 |
| TARBP1   | 336295  | 173  | 15  | 4138500 | 1182276 | 0 | 7  | 1 | 0 | 13 | 11 | 6292656  | 7.99E-01 | 1 |
| LDB1     | 1018634 | 187  | 38  | 1088648 | 274120  | 0 | 2  | 1 | 0 | 50 | 54 | 21305176 | 7.99E-01 | 1 |
| TCEAL2   | 132641  | NaN  | 4   | 593096  | 141688  | 0 | 1  | 0 | 0 | 50 | 53 | 17321536 | 7.99E-01 | 1 |
| SLC37A3  | 354350  | 587  | 28  | 1441444 | 363476  | 0 | 6  | 1 | 0 | 6  | 7  | 2035252  | 7.99E-01 | 1 |
| GPR84    | 664708  | 190  | 45  | 963692  | 312568  | 0 | 2  | 1 | 0 | 50 | 62 | 22308028 | 7.99E-01 | 1 |
| PARVB    | 158082  | 393  | 34  | 1137776 | 318976  | 0 | 4  | 0 | 0 | 6  | 11 | 3568900  | 7.99E-01 | 1 |
| CNDP2    | 162468  | 969  | 7   | 1233896 | 338200  | 0 | 4  | 1 | 0 | 50 | 59 | 19429056 | 7.99E-01 | 1 |
| ARHGAP30 | 65931   | NaN  | 13  | 1385196 | 413316  | 0 | 3  | 1 | 0 | 21 | 28 | 10204384 | 7.99E-01 | 1 |
| ALPK3    | 351352  | 213  | 28  | 4654344 | 1514424 | 0 | 13 | 4 | 0 | 5  | 16 | 5242456  | 8.00E-01 | 1 |
| HTR2C    | 23811   | NaN  | -5  | 1153440 | 334284  | 0 | 2  | 1 | 0 | 50 | 56 | 17919260 | 8.00E-01 | 1 |
| HPSE     | 335397  | 224  | 27  | 1397656 | 400856  | 0 | 3  | 0 | 0 | 15 | 19 | 7763648  | 8.00E-01 | 1 |
| CCDC134  | 1384410 | 199  | 52  | 602352  | 160200  | 0 | 1  | 1 | 0 | 33 | 28 | 11235360 | 8.00E-01 | 1 |
| STARD8   | 172747  | NaN  | 15  | 2771104 | 825920  | 0 | 5  | 0 | 0 | 2  | 0  | 1312572  | 8.00E-01 | 1 |

|          |         |      |     |         |         |   |    |   |   |    |     |          |          |   |
|----------|---------|------|-----|---------|---------|---|----|---|---|----|-----|----------|----------|---|
| PANK4    | 339388  | 228  | 38  | 1984344 | 574584  | 0 | 5  | 3 | 0 | 30 | 30  | 12300512 | 8.00E-01 | 1 |
| MAPK10   | 77738   | 549  | -4  | 1249560 | 301176  | 0 | 8  | 3 | 0 | 3  | 9   | 1584200  | 8.00E-01 | 1 |
| ENKUR    | 159854  | 276  | 8   | 681384  | 163404  | 0 | 1  | 1 | 0 | 50 | 45  | 19226492 | 8.00E-01 | 1 |
| HIFX     | 948414  | 355  | 44  | 517980  | 167676  | 0 | 1  | 1 | 0 | 50 | 85  | 24887248 | 8.00E-01 | 1 |
| OR51M1   | 99042   | 1030 | 1   | 802780  | 249200  | 0 | 1  | 1 | 0 | 50 | 49  | 19819232 | 8.00E-01 | 1 |
| C9orf152 | 203263  | 245  | 32  | 596656  | 176576  | 0 | 1  | 1 | 0 | 50 | 50  | 17872268 | 8.00E-01 | 1 |
| SAFB2    | 873075  | 295  | 17  | 2471708 | 670348  | 0 | 6  | 1 | 0 | 10 | 9   | 2899976  | 8.00E-01 | 1 |
| TIGIT    | 369332  | 614  | 19  | 616592  | 183340  | 0 | 1  | 0 | 0 | 50 | 53  | 20325464 | 8.00E-01 | 1 |
| PRICKLE4 | 429684  | 341  | 47  | 972948  | 286224  | 0 | 2  | 1 | 0 | 50 | 57  | 19608480 | 8.00E-01 | 1 |
| CLYBL    | 308985  | 612  | 45  | 874336  | 254540  | 0 | 2  | 3 | 0 | 42 | 48  | 14897888 | 8.01E-01 | 1 |
| KIRREL2  | 1060028 | 321  | 47  | 1784272 | 594164  | 0 | 4  | 1 | 0 | 50 | 67  | 19297692 | 8.01E-01 | 1 |
| PIGM     | 820944  | 365  | 15  | 1038808 | 319688  | 0 | 1  | 1 | 0 | 50 | 71  | 19111504 | 8.01E-01 | 1 |
| UQCRH    | 690472  | 205  | 31  | 252048  | 57672   | 0 | 1  | 1 | 0 | 3  | 8   | 1466720  | 8.01E-01 | 1 |
| CXCL2    | 199590  | 368  | 13  | 272696  | 86152   | 0 | 1  | 1 | 0 | 3  | 8   | 1586692  | 8.01E-01 | 1 |
| PATL1    | 431271  | 409  | 27  | 1982920 | 564260  | 0 | 3  | 1 | 0 | 31 | 35  | 13655092 | 8.01E-01 | 1 |
| PLCD1    | 318742  | 457  | 24  | 2028844 | 562124  | 0 | 3  | 1 | 0 | 50 | 68  | 24477492 | 8.01E-01 | 1 |
| ZNF3     | 1503181 | 254  | 41  | 1260596 | 324316  | 0 | 3  | 1 | 0 | 50 | 81  | 27223676 | 8.01E-01 | 1 |
| MRPL27   | 1335838 | 196  | 24  | 377716  | 116768  | 0 | 1  | 1 | 0 | 8  | 12  | 3275556  | 8.01E-01 | 1 |
| MAZ      | NaN     | NaN  | NaN | 1323964 | 447848  | 0 | 3  | 4 | 0 | 26 | 44  | 12024968 | 8.01E-01 | 1 |
| FASTKD5  | NaN     | NaN  | NaN | 1904244 | 546816  | 0 | 5  | 1 | 0 | 50 | 117 | 40192400 | 8.01E-01 | 1 |
| SGSM2    | 780080  | 271  | 29  | 2715212 | 753652  | 0 | 6  | 3 | 0 | 50 | 67  | 22879052 | 8.01E-01 | 1 |
| YJEFN3   | 868278  | 284  | 7   | 745464  | 245640  | 0 | 2  | 1 | 0 | 50 | 74  | 19156360 | 8.01E-01 | 1 |
| STEAP3   | 176742  | 558  | 14  | 1220724 | 395160  | 0 | 3  | 0 | 0 | 15 | 20  | 7438264  | 8.01E-01 | 1 |
| CNIH2    | 2133752 | 236  | 53  | 427556  | 109648  | 0 | 1  | 1 | 0 | 8  | 10  | 2971532  | 8.01E-01 | 1 |
| DLGAP3   | 603922  | 534  | 28  | 2409764 | 768604  | 0 | 9  | 2 | 0 | 50 | 79  | 23921064 | 8.01E-01 | 1 |
| ATP8B2   | 1695430 | 236  | 31  | 3274844 | 898900  | 0 | 9  | 3 | 0 | 50 | 72  | 22163848 | 8.02E-01 | 1 |
| GREB1    | 219132  | 360  | 21  | 5035976 | 1455328 | 0 | 13 | 8 | 0 | 30 | 34  | 12735188 | 8.02E-01 | 1 |
| UCKL1    | 1157316 | 206  | 36  | 1410472 | 410468  | 0 | 3  | 0 | 0 | 26 | 29  | 11317952 | 8.02E-01 | 1 |
| INPP1    | 682366  | 401  | 33  | 1015668 | 287292  | 0 | 2  | 0 | 0 | 12 | 15  | 5881832  | 8.02E-01 | 1 |
| DFNB31   | 260520  | 290  | 19  | 2197944 | 758280  | 0 | 5  | 1 | 0 | 12 | 13  | 6435768  | 8.02E-01 | 1 |
| CHRNB1   | 1906324 | 206  | 33  | 1273056 | 380208  | 0 | 5  | 1 | 0 | 50 | 87  | 23542992 | 8.02E-01 | 1 |
| TOR2A    | 1098647 | 172  | 32  | 983984  | 245284  | 0 | 1  | 2 | 0 | 46 | 62  | 15244988 | 8.02E-01 | 1 |
| TXNRD3   | NaN     | NaN  | NaN | 1658248 | 469208  | 0 | 2  | 0 | 0 | 50 | 116 | 40114792 | 8.02E-01 | 1 |

|          |         |      |     |         |         |   |    |    |   |    |     |          |          |   |
|----------|---------|------|-----|---------|---------|---|----|----|---|----|-----|----------|----------|---|
| CRLF3    | 617388  | 264  | 30  | 1135284 | 313992  | 0 | 3  | 1  | 0 | 50 | 70  | 20323328 | 8.02E-01 | 1 |
| NKX2-4   | 283501  | 638  | -3  | 846924  | 296904  | 0 | 1  | 1  | 0 | 50 | 44  | 18575724 | 8.02E-01 | 1 |
| NARS     | 304947  | 352  | 38  | 1438952 | 375580  | 0 | 3  | 3  | 0 | 49 | 45  | 16084436 | 8.02E-01 | 1 |
| TRIM42   | 108667  | 896  | 10  | 1859388 | 477396  | 0 | 11 | 5  | 0 | 6  | 15  | 2583848  | 8.02E-01 | 1 |
| CENPE    | 344088  | 569  | 3   | 7211848 | 1652552 | 0 | 19 | 5  | 0 | 11 | 22  | 7009640  | 8.02E-01 | 1 |
| TINAG    | 58216   | 617  | 4   | 1266648 | 304380  | 0 | 4  | 2  | 0 | 10 | 11  | 3327532  | 8.02E-01 | 1 |
| RGAG4    | 582710  | NaN  | 53  | 1414388 | 411892  | 0 | 2  | 1  | 0 | 19 | 28  | 8635492  | 8.02E-01 | 1 |
| ZNF436   | 1032187 | 163  | 25  | 1222504 | 299396  | 0 | 5  | 2  | 0 | 50 | 98  | 21204072 | 8.02E-01 | 1 |
| ZXDB     | 80578   | NaN  | -18 | 1949456 | 626560  | 0 | 5  | 0  | 0 | 10 | 11  | 4506604  | 8.02E-01 | 1 |
| MTHFSD   | 70370   | 416  | 3   | 1068356 | 322180  | 0 | 1  | 0  | 0 | 21 | 14  | 8766856  | 8.02E-01 | 1 |
| CHRNA5   | 505832  | 375  | 46  | 1212892 | 313280  | 0 | 3  | 0  | 0 | 50 | 59  | 20749460 | 8.03E-01 | 1 |
| OR3A2    | 506514  | 628  | 0   | 783556  | 252404  | 0 | 2  | 2  | 0 | 13 | 18  | 5228216  | 8.03E-01 | 1 |
| OR6C6    | 411183  | 816  | -1  | 780708  | 226416  | 0 | 2  | 1  | 0 | 14 | 15  | 4464240  | 8.03E-01 | 1 |
| WDR11    | 242834  | 597  | -7  | 3181216 | 863300  | 0 | 11 | 5  | 0 | 14 | 22  | 7647948  | 8.03E-01 | 1 |
| WBP4     | 305794  | 417  | 76  | 1012108 | 234248  | 0 | 2  | 0  | 0 | 3  | 3   | 1345680  | 8.03E-01 | 1 |
| DTX1     | 562320  | 387  | 44  | 1530444 | 493416  | 0 | 3  | 2  | 0 | 50 | 51  | 21834548 | 8.03E-01 | 1 |
| SPIC     | 305133  | 649  | -1  | 647920  | 160556  | 0 | 1  | 0  | 0 | 50 | 61  | 20043868 | 8.03E-01 | 1 |
| NCKAP5   | 36731   | 826  | 18  | 4813120 | 1383416 | 0 | 21 | 10 | 0 | 20 | 30  | 7425804  | 8.03E-01 | 1 |
| ZBTB5    | 534559  | 337  | 36  | 1696340 | 480244  | 0 | 5  | 0  | 0 | 12 | 11  | 4772892  | 8.03E-01 | 1 |
| C10orf62 | NaN     | NaN  | NaN | 562836  | 154860  | 0 | 1  | 1  | 0 | 50 | 117 | 39800444 | 8.03E-01 | 1 |
| SFRP1    | 248918  | 632  | -4  | 804204  | 213600  | 0 | 1  | 1  | 0 | 50 | 55  | 23632704 | 8.03E-01 | 1 |
| UHRF2    | 251045  | 431  | 23  | 2075836 | 561056  | 0 | 6  | 1  | 0 | 10 | 10  | 4335368  | 8.03E-01 | 1 |
| HMGCR    | 357296  | 490  | 17  | 2294420 | 635104  | 0 | 6  | 0  | 0 | 2  | 3   | 1895700  | 8.03E-01 | 1 |
| MBNL1    | 194580  | 402  | 27  | 1116772 | 279104  | 0 | 1  | 0  | 0 | 42 | 36  | 17893984 | 8.03E-01 | 1 |
| ITGA11   | 370132  | 531  | 41  | 3086164 | 849416  | 0 | 9  | 3  | 0 | 50 | 57  | 18621648 | 8.03E-01 | 1 |
| DCBLD2   | 337232  | 411  | 6   | 1989684 | 560700  | 0 | 4  | 3  | 0 | 50 | 51  | 17204056 | 8.03E-01 | 1 |
| ZNF687   | 1256374 | 184  | 31  | 3016388 | 984340  | 0 | 9  | 7  | 0 | 28 | 47  | 11804604 | 8.03E-01 | 1 |
| ZMAT1    | 262044  | NaN  | 16  | 1676048 | 394804  | 0 | 5  | 1  | 0 | 2  | 3   | 1604848  | 8.03E-01 | 1 |
| DDX55    | 929791  | 224  | 44  | 1568892 | 414384  | 0 | 3  | 0  | 0 | 44 | 46  | 23376028 | 8.03E-01 | 1 |
| SH3TC1   | 172983  | 242  | 51  | 3302968 | 1053404 | 0 | 7  | 5  | 0 | 50 | 48  | 19092992 | 8.03E-01 | 1 |
| PJA2     | 203821  | 583  | 15  | 1850132 | 459952  | 0 | 4  | 0  | 0 | 15 | 9   | 4384140  | 8.03E-01 | 1 |
| NOSTRIN  | 169372  | 724  | 12  | 1523324 | 356356  | 0 | 2  | 2  | 0 | 50 | 70  | 22312656 | 8.03E-01 | 1 |
| B3GALT1  | 67289   | 1010 | -14 | 826988  | 220720  | 0 | 2  | 1  | 0 | 28 | 33  | 10819552 | 8.03E-01 | 1 |

|          |         |      |     |         |         |   |    |   |   |    |     |          |          |   |
|----------|---------|------|-----|---------|---------|---|----|---|---|----|-----|----------|----------|---|
| CCDC51   | 1401411 | 263  | 32  | 1013176 | 319688  | 0 | 3  | 1 | 0 | 50 | 79  | 21907884 | 8.03E-01 | 1 |
| SH3BGR   | 294735  | 503  | 5   | 634748  | 161980  | 0 | 1  | 0 | 0 | 50 | 56  | 21853060 | 8.03E-01 | 1 |
| GLT6D1   | 362222  | 524  | 29  | 716272  | 188324  | 0 | 3  | 1 | 0 | 3  | 3   | 1017804  | 8.03E-01 | 1 |
| FAM161B  | 443041  | 158  | 51  | 1642940 | 469564  | 0 | 4  | 1 | 0 | 50 | 55  | 19172380 | 8.03E-01 | 1 |
| HELLS    | 251937  | 675  | 12  | 2236036 | 541832  | 0 | 4  | 2 | 0 | 50 | 77  | 23990128 | 8.04E-01 | 1 |
| TAS2R13  | 363803  | 644  | 2   | 762196  | 211820  | 0 | 1  | 1 | 0 | 50 | 61  | 20572172 | 8.04E-01 | 1 |
| TSPAN4   | 1799017 | 232  | 51  | 614812  | 180848  | 0 | 1  | 1 | 0 | 50 | 57  | 18763692 | 8.04E-01 | 1 |
| GBAS     | 760564  | 642  | 11  | 770028  | 190104  | 0 | 1  | 0 | 0 | 50 | 58  | 23044592 | 8.04E-01 | 1 |
| TLL1     | 81353   | 538  | -19 | 2673204 | 661092  | 0 | 6  | 2 | 0 | 50 | 63  | 21229348 | 8.04E-01 | 1 |
| KDSR     | 201946  | 278  | 77  | 859740  | 245640  | 0 | 2  | 1 | 0 | 50 | 72  | 21821732 | 8.04E-01 | 1 |
| SSBP4    | 1384225 | 259  | 42  | 1018160 | 291208  | 0 | 2  | 0 | 0 | 50 | 68  | 24078060 | 8.04E-01 | 1 |
| ABLIM3   | 339889  | 423  | 17  | 1826280 | 463512  | 0 | 2  | 2 | 0 | 50 | 58  | 21711372 | 8.04E-01 | 1 |
| ANO5     | 51558   | 935  | -7  | 2422580 | 595588  | 0 | 7  | 1 | 0 | 7  | 9   | 3208984  | 8.04E-01 | 1 |
| KPNA2    | 779255  | 283  | 1   | 1354936 | 385904  | 0 | 4  | 1 | 0 | 50 | 64  | 20733796 | 8.04E-01 | 1 |
| PAK1     | 502767  | 479  | 27  | 1493420 | 372376  | 0 | 2  | 0 | 0 | 10 | 4   | 3244584  | 8.04E-01 | 1 |
| ACSM3    | 211686  | 580  | 23  | 1665724 | 446780  | 0 | 3  | 1 | 0 | 50 | 45  | 20285236 | 8.04E-01 | 1 |
| ZNF426   | 706527  | 642  | -58 | 1443224 | 356356  | 0 | 3  | 3 | 0 | 44 | 113 | 28426244 | 8.04E-01 | 1 |
| ZKSCAN2  | 189953  | 551  | 12  | 2467792 | 659312  | 0 | 8  | 4 | 0 | 11 | 9   | 4062316  | 8.04E-01 | 1 |
| MBNL3    | 143759  | NaN  | 34  | 995020  | 281240  | 0 | 2  | 1 | 0 | 11 | 15  | 6849084  | 8.04E-01 | 1 |
| GSTA4    | 477320  | 400  | 17  | 589892  | 150232  | 0 | 1  | 0 | 0 | 50 | 57  | 19796448 | 8.04E-01 | 1 |
| OR52E2   | 97256   | 1024 | -11 | 803492  | 239944  | 0 | 2  | 2 | 0 | 15 | 18  | 5687456  | 8.04E-01 | 1 |
| TEX15    | 352456  | 346  | 11  | 7135664 | 1816312 | 0 | 25 | 3 | 0 | 24 | 26  | 11757612 | 8.04E-01 | 1 |
| ZNF75A   | 1397628 | 303  | 32  | 782844  | 181560  | 0 | 2  | 0 | 0 | 50 | 92  | 23311236 | 8.05E-01 | 1 |
| ALKBH6   | 980636  | 320  | 19  | 679604  | 203632  | 0 | 1  | 1 | 0 | 4  | 5   | 2374164  | 8.05E-01 | 1 |
| SPAG1    | 806617  | 270  | 36  | 2426852 | 620152  | 0 | 5  | 3 | 0 | 50 | 66  | 21746972 | 8.05E-01 | 1 |
| C14orf37 | 285319  | 683  | 3   | 1948744 | 564260  | 0 | 6  | 1 | 0 | 23 | 35  | 9612000  | 8.05E-01 | 1 |
| SLC39A2  | 1005555 | 429  | 4   | 754008  | 252048  | 0 | 2  | 1 | 0 | 50 | 67  | 17732716 | 8.05E-01 | 1 |
| BRPF3    | 821543  | 358  | 31  | 3030272 | 885016  | 0 | 9  | 3 | 0 | 50 | 51  | 18277752 | 8.05E-01 | 1 |
| ZNF645   | 91162   | NaN  | 2   | 1067644 | 299396  | 0 | 2  | 1 | 0 | 50 | 62  | 22640176 | 8.05E-01 | 1 |
| LRRC15   | 344707  | 269  | 34  | 1440732 | 451764  | 0 | 4  | 3 | 0 | 25 | 28  | 9645108  | 8.05E-01 | 1 |
| GPR149   | 95537   | 925  | -8  | 1822364 | 540052  | 0 | 6  | 3 | 0 | 32 | 45  | 16255316 | 8.05E-01 | 1 |
| HS3ST1   | 74823   | 1201 | 3   | 759704  | 227128  | 0 | 1  | 1 | 0 | 41 | 39  | 16267064 | 8.05E-01 | 1 |
| HAAO     | 344647  | 338  | 34  | 747956  | 212176  | 0 | 1  | 1 | 0 | 28 | 26  | 10970496 | 8.05E-01 | 1 |



|         |         |      |     |         |         |   |    |   |   |    |     |          |          |   |
|---------|---------|------|-----|---------|---------|---|----|---|---|----|-----|----------|----------|---|
| AIDA    | 222206  | 392  | 1   | 823428  | 198648  | 0 | 1  | 0 | 0 | 50 | 57  | 27572556 | 8.05E-01 | 1 |
| PTK2    | 466681  | 356  | 35  | 2847644 | 729088  | 0 | 7  | 2 | 0 | 50 | 55  | 18446852 | 8.05E-01 | 1 |
| RFXANK  | 940952  | 232  | 17  | 669636  | 200784  | 0 | 1  | 0 | 0 | 41 | 56  | 18509864 | 8.05E-01 | 1 |
| CLEC2D  | 251092  | 648  | 8   | 598436  | 127804  | 0 | 1  | 0 | 0 | 50 | 64  | 22393468 | 8.05E-01 | 1 |
| ASNS    | 455051  | 636  | 0   | 1468856 | 378784  | 0 | 2  | 0 | 0 | 26 | 42  | 12160604 | 8.05E-01 | 1 |
| TBK1    | 459373  | 411  | -22 | 1945896 | 478464  | 0 | 6  | 0 | 0 | 12 | 13  | 4692792  | 8.05E-01 | 1 |
| RPS6KA6 | 19108   | NaN  | -22 | 1980428 | 501604  | 0 | 10 | 3 | 0 | 7  | 13  | 3394460  | 8.05E-01 | 1 |
| FAM9B   | 47340   | NaN  | -11 | 527592  | 103596  | 0 | 1  | 1 | 0 | 24 | 48  | 12822052 | 8.05E-01 | 1 |
| GABPB1  | 314083  | 161  | 5   | 1047708 | 302244  | 0 | 2  | 1 | 0 | 50 | 55  | 20718844 | 8.05E-01 | 1 |
| RAB19   | 359405  | 521  | 24  | 559988  | 153436  | 0 | 1  | 0 | 0 | 50 | 82  | 27745928 | 8.05E-01 | 1 |
| TMTC1   | 99753   | 510  | -15 | 2004636 | 551088  | 0 | 4  | 3 | 0 | 8  | 15  | 4203292  | 8.05E-01 | 1 |
| MEPCE   | 1479297 | 186  | 60  | 1661452 | 562124  | 0 | 3  | 2 | 0 | 45 | 39  | 16383476 | 8.06E-01 | 1 |
| DRD2    | 108041  | 610  | 5   | 1131012 | 321468  | 0 | 4  | 1 | 0 | 50 | 64  | 18536564 | 8.06E-01 | 1 |
| RBM4    | 1432488 | 187  | 46  | 908156  | 274120  | 0 | 1  | 1 | 0 | 31 | 42  | 14892904 | 8.06E-01 | 1 |
| SLC30A3 | 1238919 | 230  | 39  | 962268  | 313992  | 0 | 2  | 1 | 0 | 50 | 56  | 18256392 | 8.06E-01 | 1 |
| RAG1    | 97499   | 412  | -17 | 2627280 | 721968  | 0 | 4  | 2 | 0 | 37 | 33  | 14693900 | 8.06E-01 | 1 |
| NAF1    | 72763   | 1218 | -7  | 1371312 | 393024  | 0 | 3  | 0 | 0 | 24 | 16  | 7770768  | 8.06E-01 | 1 |
| TACO1   | 934619  | 247  | -1  | 750092  | 221788  | 0 | 2  | 2 | 0 | 33 | 40  | 10957324 | 8.06E-01 | 1 |
| LRRC8C  | 300032  | 514  | 7   | 2020300 | 564260  | 0 | 4  | 1 | 0 | 37 | 33  | 14740892 | 8.06E-01 | 1 |
| EP400   | 408569  | 269  | 27  | 7842324 | 2385912 | 0 | 20 | 7 | 0 | 4  | 11  | 4232128  | 8.06E-01 | 1 |
| UIMC1   | 1162907 | 218  | 47  | 1880748 | 485940  | 0 | 4  | 0 | 0 | 8  | 7   | 3769684  | 8.06E-01 | 1 |
| DHX33   | 1145030 | 544  | 24  | 1785340 | 532220  | 0 | 4  | 5 | 0 | 18 | 23  | 7154176  | 8.06E-01 | 1 |
| DCAF11  | 992350  | 355  | 19  | 1426492 | 385904  | 0 | 4  | 1 | 0 | 50 | 70  | 21277764 | 8.06E-01 | 1 |
| NOSIP   | 2080142 | 210  | 41  | 772164  | 230688  | 0 | 2  | 2 | 0 | 17 | 20  | 5347832  | 8.06E-01 | 1 |
| GAB1    | 183119  | 699  | 18  | 1853692 | 511928  | 0 | 5  | 2 | 0 | 50 | 60  | 18561840 | 8.06E-01 | 1 |
| COL3A1  | 205492  | 515  | -5  | 3692788 | 1221080 | 0 | 9  | 4 | 0 | 18 | 17  | 7065176  | 8.06E-01 | 1 |
| PLEKHG3 | 608112  | 186  | 46  | 2917776 | 871488  | 0 | 5  | 4 | 0 | 50 | 67  | 20041376 | 8.06E-01 | 1 |
| WDR35   | 482678  | 390  | 24  | 3113932 | 788540  | 0 | 6  | 1 | 0 | 19 | 24  | 9109684  | 8.06E-01 | 1 |
| BCL7A   | 796948  | 211  | 31  | 606624  | 158064  | 0 | 1  | 0 | 0 | 50 | 69  | 22212976 | 8.06E-01 | 1 |
| SSX2    | NaN     | NaN  | NaN | 1317912 | 273408  | 0 | 1  | 0 | 0 | 50 | 116 | 39918992 | 8.06E-01 | 1 |
| PIK3R6  | 423397  | 636  | 11  | 1922756 | 576364  | 0 | 4  | 2 | 0 | 50 | 71  | 20685024 | 8.06E-01 | 1 |
| RAB27A  | 212605  | 573  | -20 | 585620  | 147028  | 0 | 1  | 1 | 0 | 43 | 51  | 17548308 | 8.06E-01 | 1 |
| SIKE1   | 600310  | 596  | -5  | 559988  | 138484  | 0 | 1  | 0 | 0 | 50 | 67  | 20940632 | 8.06E-01 | 1 |

|          |         |      |     |         |        |   |   |   |   |    |    |          |          |   |
|----------|---------|------|-----|---------|--------|---|---|---|---|----|----|----------|----------|---|
| RECK     | 866055  | 155  | 44  | 2547892 | 653972 | 0 | 7 | 2 | 0 | 50 | 57 | 23712092 | 8.06E-01 | 1 |
| PIAS1    | 325771  | 194  | 31  | 1678540 | 468140 | 0 | 2 | 0 | 0 | 13 | 16 | 6765068  | 8.06E-01 | 1 |
| LYPLA1   | 268612  | 450  | 31  | 609116  | 165184 | 0 | 1 | 1 | 0 | 50 | 60 | 23006144 | 8.06E-01 | 1 |
| NEK8     | 1695792 | 208  | 40  | 1744400 | 535780 | 0 | 4 | 0 | 0 | 5  | 3  | 1668216  | 8.06E-01 | 1 |
| KNASEH2E | 137500  | 621  | 34  | 876116  | 206836 | 0 | 1 | 0 | 0 | 50 | 48 | 19838100 | 8.06E-01 | 1 |
| SLC35D1  | 387355  | 673  | -4  | 920616  | 267000 | 0 | 2 | 2 | 0 | 45 | 47 | 15541180 | 8.06E-01 | 1 |
| MSLNL    | 1187310 | 273  | 39  | 2567116 | 873980 | 0 | 6 | 1 | 0 | 30 | 36 | 11469608 | 8.06E-01 | 1 |
| EPX      | 851306  | 401  | 14  | 1788900 | 556428 | 0 | 5 | 0 | 0 | 1  | 1  | 969388   | 8.07E-01 | 1 |
| OR5B3    | 475497  | 835  | -29 | 781420  | 225704 | 0 | 2 | 2 | 0 | 50 | 60 | 16320820 | 8.07E-01 | 1 |
| ULBP1    | 423805  | 245  | 34  | 637240  | 166964 | 0 | 1 | 0 | 0 | 50 | 59 | 20035324 | 8.07E-01 | 1 |
| HNRNPH3  | 615189  | 250  | 20  | 913852  | 236384 | 0 | 2 | 0 | 0 | 50 | 57 | 19504528 | 8.07E-01 | 1 |
| PSMD2    | 1447013 | 268  | 44  | 2332156 | 667856 | 0 | 6 | 5 | 0 | 19 | 29 | 8493092  | 8.07E-01 | 1 |
| KCTD8    | 73476   | 1109 | -10 | 1170884 | 352084 | 0 | 3 | 0 | 0 | 15 | 27 | 8485260  | 8.07E-01 | 1 |
| OXSM     | 217009  | 717  | -3  | 1135284 | 349236 | 0 | 2 | 0 | 0 | 32 | 44 | 15912844 | 8.07E-01 | 1 |
| HPRT1    | 270801  | NaN  | 45  | 588824  | 147028 | 0 | 1 | 0 | 0 | 50 | 74 | 23163852 | 8.07E-01 | 1 |
| RBX1     | 1044535 | 269  | 43  | 302244  | 66216  | 0 | 1 | 1 | 0 | 2  | 2  | 734784   | 8.07E-01 | 1 |
| IRF4     | 208360  | 631  | 48  | 1171596 | 310788 | 0 | 3 | 1 | 0 | 50 | 55 | 17448272 | 8.07E-01 | 1 |
| CDK20    | 207783  | 628  | 5   | 964760  | 218584 | 0 | 1 | 0 | 0 | 50 | 51 | 21413756 | 8.07E-01 | 1 |
| SPATA16  | 222219  | 577  | -15 | 1497692 | 371308 | 0 | 3 | 0 | 0 | 44 | 36 | 16986896 | 8.07E-01 | 1 |
| WAS      | 824559  | NaN  | 27  | 1254544 | 406196 | 0 | 3 | 1 | 0 | 50 | 75 | 24392764 | 8.07E-01 | 1 |
| FOXL2    | 345888  | 340  | 21  | 901748  | 306160 | 0 | 5 | 2 | 0 | 3  | 5  | 968320   | 8.07E-01 | 1 |
| ZNF655   | 1460222 | 332  | 56  | 1726244 | 423640 | 0 | 5 | 0 | 0 | 25 | 25 | 8683196  | 8.07E-01 | 1 |
| ZNF768   | 2214934 | 142  | 54  | 1347104 | 390532 | 0 | 7 | 3 | 0 | 5  | 13 | 2288012  | 8.07E-01 | 1 |
| IWS1     | 471209  | 229  | 30  | 2169820 | 512996 | 0 | 4 | 2 | 0 | 50 | 53 | 18478892 | 8.08E-01 | 1 |
| DUSP2    | 850399  | 251  | 48  | 761840  | 262372 | 0 | 1 | 1 | 0 | 50 | 61 | 24385644 | 8.08E-01 | 1 |
| ZFR2     | 2201226 | 204  | 37  | 2475268 | 788540 | 0 | 7 | 0 | 0 | 0  | 0  | 788540   | 8.08E-01 | 1 |
| PCDHGC5  | 665835  | 568  | 9   | 2419732 | 805628 | 0 | 4 | 1 | 0 | 7  | 4  | 3452488  | 8.08E-01 | 1 |
| PAX5     | 429504  | 542  | 34  | 1000360 | 294056 | 0 | 1 | 1 | 0 | 50 | 36 | 17098324 | 8.08E-01 | 1 |
| ME2      | 212718  | 332  | 61  | 1531512 | 406908 | 0 | 1 | 1 | 0 | 50 | 50 | 19362484 | 8.08E-01 | 1 |
| KIAA2013 | 519155  | 207  | 43  | 1514068 | 529016 | 0 | 3 | 0 | 0 | 7  | 3  | 2103604  | 8.08E-01 | 1 |
| PRR25    | 1187310 | 273  | 39  | 939484  | 359204 | 0 | 2 | 0 | 0 | 50 | 70 | 23301268 | 8.08E-01 | 1 |
| OR5AK2   | 474417  | 617  | -38 | 773232  | 217872 | 0 | 3 | 2 | 0 | 15 | 32 | 6556096  | 8.08E-01 | 1 |
| CDKAL1   | 132584  | 883  | 10  | 1517984 | 400144 | 0 | 6 | 3 | 0 | 15 | 24 | 5567840  | 8.08E-01 | 1 |

|          |         |      |     |         |         |   |    |   |   |    |    |          |          |   |
|----------|---------|------|-----|---------|---------|---|----|---|---|----|----|----------|----------|---|
| UBAP2L   | 1841112 | 185  | 32  | 2819164 | 833396  | 0 | 9  | 3 | 0 | 50 | 97 | 23540856 | 8.08E-01 | 1 |
| DLGAP2   | 99986   | 671  | -37 | 2467436 | 706660  | 0 | 5  | 3 | 0 | 4  | 10 | 3400512  | 8.08E-01 | 1 |
| C17orf70 | 3665223 | 205  | 12  | 2128880 | 733360  | 0 | 3  | 3 | 0 | 41 | 41 | 15183400 | 8.09E-01 | 1 |
| KANK1    | 136434  | 548  | 16  | 3405140 | 976864  | 0 | 10 | 3 | 0 | 6  | 10 | 3182640  | 8.09E-01 | 1 |
| TAF1C    | 582429  | 364  | 12  | 2131016 | 712000  | 0 | 5  | 2 | 0 | 37 | 46 | 17599928 | 8.09E-01 | 1 |
| VAPB     | 962331  | 385  | 24  | 636884  | 166252  | 0 | 2  | 2 | 0 | 5  | 16 | 2579932  | 8.09E-01 | 1 |
| C5orf51  | 113456  | 795  | 23  | 771808  | 194732  | 0 | 1  | 0 | 0 | 50 | 47 | 19282028 | 8.09E-01 | 1 |
| CLPTM1L  | 612621  | 541  | 30  | 1414032 | 383412  | 0 | 4  | 2 | 0 | 50 | 76 | 24615976 | 8.09E-01 | 1 |
| CDC7     | 269978  | 454  | -6  | 1505880 | 387684  | 0 | 4  | 1 | 0 | 50 | 51 | 19657608 | 8.09E-01 | 1 |
| LIN28A   | 1046693 | 181  | 33  | 538984  | 146672  | 0 | 1  | 1 | 0 | 50 | 62 | 18137132 | 8.09E-01 | 1 |
| SLC12A6  | 498240  | 193  | 16  | 3059464 | 859028  | 0 | 7  | 2 | 0 | 50 | 49 | 19929948 | 8.09E-01 | 1 |
| KLF4     | 255934  | 434  | -14 | 1172308 | 382700  | 0 | 2  | 1 | 0 | 50 | 45 | 17800000 | 8.09E-01 | 1 |
| CPT2     | 527317  | 391  | 27  | 1647924 | 480600  | 0 | 5  | 0 | 0 | 3  | 2  | 1393384  | 8.09E-01 | 1 |
| APEH     | 1551582 | 271  | 48  | 1904600 | 533644  | 0 | 4  | 3 | 0 | 50 | 72 | 21923548 | 8.09E-01 | 1 |
| KIF22    | NaN     | NaN  | NaN | 1674624 | 519048  | 0 | 5  | 0 | 0 | 9  | 16 | 4876488  | 8.09E-01 | 1 |
| PI4K2A   | 514755  | 143  | 54  | 1220368 | 353864  | 0 | 2  | 3 | 0 | 19 | 24 | 6368484  | 8.09E-01 | 1 |
| UPF1     | 1302747 | 189  | 27  | 2867224 | 816308  | 0 | 10 | 6 | 0 | 5  | 16 | 3122120  | 8.09E-01 | 1 |
| RAPSN    | 1022438 | 245  | 47  | 1057676 | 295480  | 0 | 2  | 0 | 0 | 50 | 66 | 23883684 | 8.09E-01 | 1 |
| NSD1     | 948717  | 227  | 42  | 6834132 | 1901040 | 0 | 18 | 4 | 0 | 12 | 15 | 5674284  | 8.09E-01 | 1 |
| STOX1    | 916932  | 216  | 43  | 2510868 | 680316  | 0 | 5  | 0 | 0 | 28 | 29 | 14802480 | 8.10E-01 | 1 |
| CHSY3    | 12401   | 1069 | -8  | 2210760 | 626916  | 0 | 6  | 1 | 0 | 35 | 44 | 16485292 | 8.10E-01 | 1 |
| POLR3E   | 483001  | 235  | 50  | 1856896 | 500180  | 0 | 1  | 1 | 0 | 50 | 38 | 18234320 | 8.10E-01 | 1 |
| C9orf84  | 540873  | 264  | 17  | 3911728 | 969032  | 0 | 9  | 1 | 0 | 13 | 12 | 4893932  | 8.10E-01 | 1 |
| SMNDC1   | 449754  | 359  | 18  | 631900  | 153080  | 0 | 1  | 1 | 0 | 50 | 63 | 20954516 | 8.10E-01 | 1 |
| SEZ6     | 1793486 | 220  | 36  | 2510868 | 759348  | 0 | 5  | 0 | 0 | 2  | 2  | 1385552  | 8.10E-01 | 1 |
| ZNF823   | 904926  | 521  | -1  | 1583488 | 386972  | 0 | 8  | 1 | 0 | 22 | 30 | 7232496  | 8.10E-01 | 1 |
| F2R      | 257923  | 372  | 46  | 1051624 | 317552  | 0 | 2  | 1 | 0 | 50 | 58 | 20299120 | 8.10E-01 | 1 |
| FAM117B  | 549913  | 515  | 26  | 1457820 | 464580  | 0 | 2  | 3 | 0 | 34 | 38 | 11870820 | 8.10E-01 | 1 |
| HTATIP2  | 168576  | 547  | -6  | 792100  | 233180  | 0 | 1  | 0 | 0 | 38 | 48 | 16625200 | 8.10E-01 | 1 |
| FIGF     | 200632  | NaN  | 40  | 930228  | 232824  | 0 | 2  | 0 | 0 | 17 | 28 | 9467108  | 8.10E-01 | 1 |
| SORT1    | 1030626 | 302  | 28  | 2148104 | 600928  | 0 | 6  | 2 | 0 | 17 | 23 | 9014632  | 8.10E-01 | 1 |
| PLEKHG6  | 2670962 | 198  | 46  | 2006416 | 639020  | 0 | 7  | 3 | 0 | 3  | 7  | 1833400  | 8.10E-01 | 1 |
| NFIA     | 113571  | 399  | -8  | 1473484 | 422216  | 0 | 3  | 0 | 0 | 39 | 36 | 15507716 | 8.10E-01 | 1 |

|          |         |     |     |         |         |   |    |   |   |    |     |          |          |   |
|----------|---------|-----|-----|---------|---------|---|----|---|---|----|-----|----------|----------|---|
| PRPS1L1  | 89480   | 675 | -1  | 795304  | 231044  | 0 | 4  | 2 | 0 | 4  | 12  | 2417240  | 8.10E-01 | 1 |
| STK19    | 2314693 | 203 | 34  | 961912  | 304736  | 0 | 2  | 2 | 0 | 3  | 2   | 1410472  | 8.11E-01 | 1 |
| PPP2R1A  | 478211  | 896 | -38 | 1497336 | 452832  | 0 | 4  | 3 | 0 | 50 | 69  | 18103668 | 8.11E-01 | 1 |
| TAF7     | 729604  | 645 | -10 | 891068  | 230332  | 0 | 1  | 0 | 0 | 50 | 112 | 24591768 | 8.11E-01 | 1 |
| VSTM1    | 798576  | 338 | -46 | 632612  | 160912  | 0 | 6  | 4 | 0 | 2  | 6   | 670348   | 8.11E-01 | 1 |
| PPOX     | 728669  | 234 | 37  | 1195804 | 389108  | 0 | 5  | 4 | 0 | 9  | 17  | 3362420  | 8.11E-01 | 1 |
| CISH     | 583785  | 302 | 50  | 697760  | 222856  | 0 | 1  | 0 | 0 | 50 | 43  | 17510216 | 8.11E-01 | 1 |
| ENPEP    | 81828   | 684 | -3  | 2496272 | 654328  | 0 | 7  | 2 | 0 | 32 | 50  | 12817780 | 8.11E-01 | 1 |
| OIT3     | 635147  | 291 | 38  | 1391248 | 392312  | 0 | 4  | 0 | 0 | 7  | 8   | 3131732  | 8.11E-01 | 1 |
| CSTF2T   | NaN     | NaN | NaN | 1496980 | 482024  | 0 | 4  | 3 | 0 | 50 | 119 | 40127608 | 8.11E-01 | 1 |
| ULK2     | 553377  | 220 | -11 | 2687444 | 750448  | 0 | 7  | 0 | 0 | 1  | 0   | 952300   | 8.11E-01 | 1 |
| BMS1     | 420649  | 787 | -27 | 3359928 | 844788  | 0 | 10 | 2 | 0 | 6  | 6   | 2807416  | 8.11E-01 | 1 |
| PDE4DIP  | NaN     | NaN | NaN | 7374896 | 2024572 | 0 | 16 | 7 | 0 | 50 | 123 | 41670156 | 8.11E-01 | 1 |
| SEMA3C   | 114018  | 419 | -27 | 1967968 | 514064  | 0 | 5  | 2 | 0 | 50 | 94  | 22861964 | 8.11E-01 | 1 |
| TTC37    | 314679  | 431 | 26  | 4123192 | 1060880 | 0 | 9  | 1 | 0 | 1  | 1   | 1231048  | 8.12E-01 | 1 |
| CTSC     | 148974  | 526 | -10 | 1303672 | 346388  | 0 | 4  | 1 | 0 | 6  | 6   | 2496984  | 8.12E-01 | 1 |
| EVC2     | 69455   | 688 | 19  | 3340348 | 945536  | 0 | 10 | 3 | 0 | 50 | 54  | 20208696 | 8.12E-01 | 1 |
| CD200R1L | 240755  | 616 | 6   | 697048  | 195800  | 0 | 1  | 2 | 0 | 21 | 19  | 8165572  | 8.12E-01 | 1 |
| SRL      | 825667  | 154 | 32  | 1208976 | 333216  | 0 | 3  | 2 | 0 | 50 | 71  | 23327968 | 8.12E-01 | 1 |
| PIPOX    | 1752742 | 236 | 34  | 998224  | 284444  | 0 | 3  | 3 | 0 | 9  | 18  | 3667156  | 8.12E-01 | 1 |
| HAPLN1   | 220863  | 552 | -9  | 903528  | 250980  | 0 | 2  | 0 | 0 | 50 | 67  | 22173104 | 8.12E-01 | 1 |
| MRPL16   | 395993  | 494 | 8   | 635816  | 184408  | 0 | 1  | 0 | 0 | 50 | 53  | 19654760 | 8.12E-01 | 1 |
| ZDHHC4   | 946573  | 387 | 40  | 886440  | 246708  | 0 | 2  | 1 | 0 | 50 | 70  | 19201216 | 8.12E-01 | 1 |
| RAG2     | 96246   | 531 | -26 | 1336068 | 359916  | 0 | 4  | 2 | 0 | 50 | 102 | 22901836 | 8.12E-01 | 1 |
| LIG1     | 973756  | 431 | 26  | 2378436 | 684588  | 0 | 5  | 0 | 0 | 1  | 1   | 1081172  | 8.12E-01 | 1 |
| BSN      | 1657622 | 271 | 40  | 9451088 | 3173740 | 0 | 22 | 4 | 0 | 20 | 27  | 13246404 | 8.12E-01 | 1 |
| PNMAL2   | 1099113 | 393 | 25  | 1540056 | 497688  | 0 | 5  | 2 | 0 | 50 | 66  | 20824932 | 8.12E-01 | 1 |
| PLEKHH1  | 483892  | 311 | 46  | 3476340 | 1016736 | 0 | 4  | 1 | 0 | 26 | 22  | 12725932 | 8.12E-01 | 1 |
| C1QTNF4  | 989876  | 214 | 28  | 784268  | 277324  | 0 | 1  | 0 | 0 | 50 | 74  | 23251428 | 8.12E-01 | 1 |
| KCTD7    | 615008  | 246 | 43  | 730156  | 216092  | 0 | 1  | 1 | 0 | 50 | 57  | 22742348 | 8.12E-01 | 1 |
| ZFP82    | 714733  | 758 | -61 | 1391604 | 333216  | 0 | 6  | 0 | 0 | 11 | 18  | 3804928  | 8.12E-01 | 1 |
| CTSE     | 468286  | 400 | 32  | 1113924 | 238164  | 0 | 2  | 0 | 0 | 47 | 49  | 18606340 | 8.12E-01 | 1 |
| RAB6B    | 530925  | 520 | 25  | 559632  | 139908  | 0 | 1  | 1 | 0 | 50 | 50  | 16137836 | 8.12E-01 | 1 |

|         |         |      |     |         |        |   |   |   |   |    |     |          |          |   |
|---------|---------|------|-----|---------|--------|---|---|---|---|----|-----|----------|----------|---|
| DYRK2   | 232901  | 596  | -9  | 1496268 | 441084 | 0 | 2 | 0 | 0 | 2  | 1   | 1689932  | 8.12E-01 | 1 |
| CNPY4   | 1299015 | 205  | 52  | 652548  | 167676 | 0 | 1 | 1 | 0 | 35 | 32  | 12810304 | 8.12E-01 | 1 |
| HTR3E   | 1453689 | 334  | 42  | 1198296 | 343896 | 0 | 4 | 1 | 0 | 10 | 20  | 5986140  | 8.13E-01 | 1 |
| DLX1    | 534370  | 295  | 34  | 656820  | 171948 | 0 | 1 | 1 | 0 | 24 | 27  | 8869384  | 8.13E-01 | 1 |
| KCNC1   | 499802  | 582  | 19  | 1479180 | 445356 | 0 | 5 | 1 | 0 | 4  | 4   | 1623360  | 8.13E-01 | 1 |
| PRMT7   | 819579  | 281  | 46  | 1808836 | 486296 | 0 | 6 | 0 | 0 | 5  | 6   | 2560352  | 8.13E-01 | 1 |
| SIPA1   | 4131934 | 202  | 53  | 2531872 | 873980 | 0 | 4 | 4 | 0 | 27 | 30  | 12483852 | 8.13E-01 | 1 |
| MRPS23  | 873797  | 222  | 6   | 494128  | 137060 | 0 | 1 | 0 | 0 | 50 | 66  | 19357500 | 8.13E-01 | 1 |
| GPR160  | 396829  | 426  | 27  | 863300  | 227128 | 0 | 1 | 0 | 0 | 50 | 44  | 22887596 | 8.13E-01 | 1 |
| WASL    | 86898   | 536  | -13 | 1286228 | 377716 | 0 | 1 | 0 | 0 | 16 | 33  | 11253160 | 8.13E-01 | 1 |
| DUSP10  | 37303   | 599  | 2   | 1206484 | 353864 | 0 | 3 | 1 | 0 | 34 | 55  | 19620584 | 8.13E-01 | 1 |
| SKA3    | 447305  | 240  | 43  | 1116416 | 291208 | 0 | 2 | 0 | 0 | 50 | 47  | 18943116 | 8.13E-01 | 1 |
| GJB5    | 548013  | 580  | 19  | 681028  | 201140 | 0 | 4 | 0 | 0 | 2  | 2   | 669280   | 8.13E-01 | 1 |
| HNRNPH2 | 374364  | NaN  | 37  | 1135996 | 310076 | 0 | 2 | 0 | 0 | 25 | 27  | 11161312 | 8.13E-01 | 1 |
| HAVCR2  | 166999  | 1198 | 18  | 772876  | 220364 | 0 | 1 | 0 | 0 | 50 | 43  | 19254260 | 8.13E-01 | 1 |
| HSPA9   | 1188562 | 205  | 52  | 1754368 | 492704 | 0 | 4 | 1 | 0 | 50 | 59  | 22765844 | 8.13E-01 | 1 |
| ACRBP   | 2816983 | 210  | 61  | 1398368 | 385192 | 0 | 2 | 0 | 0 | 25 | 55  | 15777920 | 8.13E-01 | 1 |
| SNTB1   | 154339  | 819  | 2   | 1339272 | 413316 | 0 | 3 | 0 | 0 | 23 | 30  | 9884696  | 8.13E-01 | 1 |
| JAGN1   | 950574  | 170  | 54  | 463156  | 130652 | 0 | 1 | 0 | 0 | 50 | 71  | 20154584 | 8.13E-01 | 1 |
| MPPED1  | 354735  | 618  | -6  | 736920  | 208260 | 0 | 1 | 1 | 0 | 50 | 47  | 16691772 | 8.13E-01 | 1 |
| TMEM175 | 675007  | 256  | 45  | 1251696 | 409044 | 0 | 2 | 2 | 0 | 36 | 37  | 16261012 | 8.13E-01 | 1 |
| NME6    | 1054170 | 263  | 37  | 506232  | 142044 | 0 | 1 | 0 | 0 | 50 | 63  | 18179140 | 8.13E-01 | 1 |
| ZBED1   | NaN     | NaN  | NaN | 1727668 | 506588 | 0 | 5 | 2 | 0 | 50 | 118 | 40152172 | 8.13E-01 | 1 |
| HEY1    | 147129  | 428  | 30  | 760772  | 246352 | 0 | 1 | 0 | 0 | 43 | 52  | 20861600 | 8.13E-01 | 1 |
| SLC25A1 | 487560  | 277  | 18  | 791032  | 242792 | 0 | 1 | 0 | 0 | 36 | 33  | 13333268 | 8.14E-01 | 1 |
| ZNF234  | 554986  | 634  | -28 | 1826280 | 436812 | 0 | 5 | 0 | 0 | 50 | 52  | 17611320 | 8.14E-01 | 1 |
| CD1C    | 120861  | 833  | 3   | 855824  | 235672 | 0 | 2 | 2 | 0 | 37 | 48  | 13642632 | 8.14E-01 | 1 |
| LEFTY2  | 923085  | 239  | 20  | 897120  | 291564 | 0 | 2 | 2 | 0 | 26 | 35  | 11269180 | 8.14E-01 | 1 |
| SNRPA1  | 372683  | 406  | 2   | 670348  | 186188 | 0 | 1 | 0 | 0 | 50 | 53  | 20605636 | 8.14E-01 | 1 |
| WDR44   | 131060  | NaN  | 25  | 2381996 | 627628 | 0 | 7 | 0 | 0 | 7  | 8   | 3551812  | 8.14E-01 | 1 |
| CCND2   | 305146  | 860  | 35  | 736208  | 210040 | 0 | 1 | 0 | 0 | 50 | 51  | 18886868 | 8.14E-01 | 1 |
| FAM90A1 | 172474  | 438  | 26  | 1141692 | 365256 | 0 | 5 | 5 | 0 | 8  | 10  | 2385200  | 8.14E-01 | 1 |
| KCNG3   | 254123  | 368  | 24  | 1073340 | 331080 | 0 | 1 | 1 | 0 | 50 | 52  | 22214400 | 8.14E-01 | 1 |

|          |         |      |     |         |         |   |    |   |   |    |    |          |          |   |
|----------|---------|------|-----|---------|---------|---|----|---|---|----|----|----------|----------|---|
| SEMA4A   | 2294665 | 211  | 39  | 1923468 | 577788  | 0 | 6  | 4 | 0 | 17 | 18 | 6366348  | 8.14E-01 | 1 |
| SEMA6D   | 140187  | 583  | -58 | 2798872 | 762908  | 0 | 10 | 3 | 0 | 7  | 10 | 2655404  | 8.14E-01 | 1 |
| PSAP     | 765338  | 182  | 40  | 1391960 | 362764  | 0 | 4  | 1 | 0 | 37 | 42 | 13222196 | 8.14E-01 | 1 |
| ALDH1A3  | 378556  | 374  | 0   | 1318980 | 375936  | 0 | 2  | 1 | 0 | 50 | 41 | 18549024 | 8.14E-01 | 1 |
| C5orf42  | 355603  | 213  | 29  | 8298004 | 2166260 | 0 | 21 | 3 | 0 | 1  | 3  | 2555724  | 8.14E-01 | 1 |
| SUPT6H   | 1673468 | 208  | 36  | 4537932 | 1149168 | 0 | 14 | 5 | 0 | 13 | 23 | 7061972  | 8.14E-01 | 1 |
| C17orf64 | 436889  | 204  | 1   | 619440  | 163404  | 0 | 1  | 0 | 0 | 50 | 53 | 19269924 | 8.14E-01 | 1 |
| ZNF197   | 435137  | 541  | 40  | 2700260 | 665008  | 0 | 8  | 1 | 0 | 32 | 41 | 12650816 | 8.14E-01 | 1 |
| NDUFV1   | 1374022 | 393  | 53  | 1176936 | 353508  | 0 | 3  | 1 | 0 | 31 | 38 | 12874384 | 8.14E-01 | 1 |
| EXTL1    | 748547  | 221  | 31  | 1674624 | 537204  | 0 | 4  | 1 | 0 | 37 | 34 | 12359964 | 8.14E-01 | 1 |
| ZNF319   | 856192  | 158  | 9   | 1443936 | 423996  | 0 | 3  | 1 | 0 | 50 | 56 | 19314424 | 8.14E-01 | 1 |
| INO80D   | 290764  | 492  | 23  | 2576728 | 755432  | 0 | 8  | 3 | 0 | 50 | 66 | 23182008 | 8.14E-01 | 1 |
| CMTM1    | 777342  | 214  | 9   | 716984  | 217516  | 0 | 2  | 2 | 0 | 16 | 36 | 9379888  | 8.14E-01 | 1 |
| TRIM45   | 331822  | 566  | 12  | 1463516 | 419368  | 0 | 3  | 0 | 0 | 11 | 9  | 3044156  | 8.14E-01 | 1 |
| BMP10    | 404215  | 470  | 27  | 1072628 | 293344  | 0 | 3  | 1 | 0 | 7  | 9  | 3626216  | 8.14E-01 | 1 |
| TRMT2B   | 418391  | NaN  | 37  | 1301536 | 367748  | 0 | 2  | 0 | 0 | 50 | 52 | 22193752 | 8.15E-01 | 1 |
| NUBPL    | 335822  | 583  | -7  | 834108  | 236028  | 0 | 2  | 0 | 0 | 20 | 20 | 6247444  | 8.15E-01 | 1 |
| DMKN     | 954618  | 367  | 35  | 1500184 | 430760  | 0 | 1  | 1 | 0 | 19 | 21 | 8718796  | 8.15E-01 | 1 |
| UNCX     | 748119  | 384  | 40  | 1260952 | 451052  | 0 | 2  | 0 | 0 | 5  | 13 | 6885040  | 8.15E-01 | 1 |
| BPTF     | 772730  | 293  | 1   | 7757240 | 2131372 | 0 | 27 | 6 | 0 | 6  | 8  | 3912084  | 8.15E-01 | 1 |
| CD276    | 312591  | 374  | 29  | 1341052 | 411536  | 0 | 1  | 1 | 0 | 50 | 34 | 20103320 | 8.15E-01 | 1 |
| FAM26E   | 261450  | 479  | 19  | 782132  | 217516  | 0 | 1  | 0 | 0 | 50 | 57 | 23330104 | 8.15E-01 | 1 |
| HSD17B3  | 293976  | 504  | 20  | 815240  | 226060  | 0 | 1  | 1 | 0 | 50 | 57 | 22265664 | 8.15E-01 | 1 |
| ALG1     | 552298  | 419  | 3   | 1198296 | 344964  | 0 | 2  | 1 | 0 | 50 | 50 | 19837032 | 8.15E-01 | 1 |
| PML      | 375211  | 344  | 41  | 2997876 | 943044  | 0 | 7  | 0 | 0 | 0  | 0  | 943044   | 8.15E-01 | 1 |
| PAPOLG   | 370439  | 436  | 18  | 1932368 | 518692  | 0 | 4  | 0 | 0 | 17 | 20 | 8360660  | 8.15E-01 | 1 |
| ZNF530   | 532349  | 849  | -37 | 1532580 | 398364  | 0 | 3  | 0 | 0 | 22 | 27 | 8358168  | 8.15E-01 | 1 |
| ADAMTS4  | 728669  | 234  | 37  | 2051984 | 667144  | 0 | 5  | 2 | 0 | 39 | 44 | 15898604 | 8.15E-01 | 1 |
| GPR20    | 219865  | 239  | 41  | 846924  | 307584  | 0 | 2  | 2 | 0 | 16 | 21 | 6325052  | 8.15E-01 | 1 |
| CLCNKA   | 886121  | 197  | 43  | 1755792 | 529728  | 0 | 4  | 3 | 0 | 50 | 55 | 20099048 | 8.15E-01 | 1 |
| POLE2    | 612579  | 342  | 25  | 1413676 | 359204  | 0 | 1  | 1 | 0 | 37 | 28 | 16443996 | 8.15E-01 | 1 |
| ZNF701   | 546511  | 1005 | -53 | 1372736 | 348880  | 0 | 3  | 0 | 0 | 29 | 27 | 10802108 | 8.15E-01 | 1 |
| ABO      | 1865433 | 416  | 45  | 897476  | 266644  | 0 | 2  | 0 | 0 | 50 | 64 | 17966608 | 8.15E-01 | 1 |

|         |         |     |     |         |        |   |   |   |   |    |    |          |          |   |
|---------|---------|-----|-----|---------|--------|---|---|---|---|----|----|----------|----------|---|
| GAS6    | 716976  | 465 | 45  | 1730872 | 504452 | 0 | 3 | 0 | 0 | 33 | 37 | 15963752 | 8.15E-01 | 1 |
| BEND5   | 25250   | 886 | -8  | 1081528 | 296192 | 0 | 2 | 0 | 0 | 50 | 83 | 29777620 | 8.15E-01 | 1 |
| TMEM140 | 464513  | 594 | 20  | 446068  | 154148 | 0 | 1 | 1 | 0 | 50 | 57 | 15046340 | 8.15E-01 | 1 |
| SLC4A2  | 622098  | 373 | 41  | 3088300 | 985052 | 0 | 5 | 3 | 0 | 3  | 5  | 2744048  | 8.15E-01 | 1 |
| GABRB1  | 106512  | 689 | 24  | 1222504 | 333572 | 0 | 6 | 3 | 0 | 3  | 3  | 1166612  | 8.16E-01 | 1 |
| TES     | 445405  | 363 | -9  | 1116416 | 261304 | 0 | 2 | 0 | 0 | 15 | 21 | 8614488  | 8.16E-01 | 1 |
| PLCG1   | 383568  | 362 | 13  | 3381644 | 890356 | 0 | 9 | 2 | 0 | 5  | 7  | 3327888  | 8.16E-01 | 1 |
| FUK     | 930873  | 125 | 44  | 2699192 | 875404 | 0 | 5 | 2 | 0 | 50 | 63 | 24667952 | 8.16E-01 | 1 |
| PNO1    | 197504  | 594 | 14  | 654684  | 183696 | 0 | 1 | 0 | 0 | 50 | 55 | 18711004 | 8.16E-01 | 1 |
| LRFN4   | NaN     | NaN | NaN | 1480604 | 561412 | 0 | 3 | 0 | 0 | 9  | 16 | 4918852  | 8.16E-01 | 1 |
| P2RY1   | 224331  | 861 | 8   | 921328  | 276968 | 0 | 2 | 1 | 0 | 50 | 58 | 18917840 | 8.16E-01 | 1 |
| SORBS1  | 295509  | 445 | 17  | 3492004 | 993596 | 0 | 9 | 3 | 0 | 23 | 28 | 12872960 | 8.16E-01 | 1 |
| TCP1    | 648197  | 420 | 22  | 1430052 | 401568 | 0 | 3 | 2 | 0 | 50 | 70 | 24941360 | 8.16E-01 | 1 |
| LIAS    | 648710  | 177 | 43  | 980068  | 259880 | 0 | 2 | 1 | 0 | 50 | 66 | 22117568 | 8.16E-01 | 1 |
| LGI2    | 293829  | 582 | 26  | 1404776 | 376648 | 0 | 2 | 1 | 0 | 50 | 67 | 27511324 | 8.16E-01 | 1 |
| CPSF7   | 1394229 | 286 | 57  | 1292992 | 401924 | 0 | 1 | 2 | 0 | 50 | 56 | 17921040 | 8.16E-01 | 1 |
| GRAMD3  | 234274  | 201 | 10  | 1369888 | 301532 | 0 | 3 | 1 | 0 | 50 | 51 | 18116840 | 8.16E-01 | 1 |
| FCN2    | 229567  | 450 | 26  | 808832  | 229264 | 0 | 2 | 3 | 0 | 5  | 7  | 1620868  | 8.16E-01 | 1 |
| IDE     | 363888  | 236 | 23  | 2704176 | 668568 | 0 | 3 | 0 | 0 | 13 | 9  | 7559660  | 8.16E-01 | 1 |
| HEXIM2  | 806811  | 207 | 32  | 713780  | 214312 | 0 | 1 | 0 | 0 | 50 | 63 | 22248576 | 8.16E-01 | 1 |
| CHRM4   | 817153  | 212 | 45  | 1159492 | 380564 | 0 | 2 | 0 | 0 | 30 | 36 | 13043484 | 8.16E-01 | 1 |
| PEX10   | 561270  | 302 | 24  | 852976  | 282308 | 0 | 1 | 0 | 0 | 50 | 37 | 18961984 | 8.16E-01 | 1 |
| TPP1    | 424523  | 491 | 17  | 1426492 | 433964 | 0 | 1 | 2 | 0 | 50 | 62 | 22561500 | 8.17E-01 | 1 |
| FAM35A  | 403850  | 144 | 27  | 2143476 | 564972 | 0 | 4 | 1 | 0 | 29 | 28 | 15292692 | 8.17E-01 | 1 |
| CPT1C   | 1716449 | 192 | 41  | 2042728 | 610184 | 0 | 8 | 0 | 0 | 12 | 19 | 5666808  | 8.17E-01 | 1 |
| KIF25   | 142012  | 702 | -17 | 966184  | 303668 | 0 | 2 | 1 | 0 | 40 | 76 | 23394540 | 8.17E-01 | 1 |
| ZNF284  | 533136  | 558 | -35 | 1559636 | 360628 | 0 | 6 | 1 | 0 | 50 | 58 | 16442928 | 8.17E-01 | 1 |
| CHP2    | 517081  | 598 | 33  | 518692  | 138128 | 0 | 1 | 1 | 0 | 50 | 61 | 19252836 | 8.17E-01 | 1 |
| OR2G3   | 204354  | 957 | -25 | 757212  | 234960 | 0 | 3 | 2 | 0 | 21 | 47 | 9325064  | 8.17E-01 | 1 |
| E2F2    | 1050775 | 159 | 32  | 1092208 | 336776 | 0 | 3 | 0 | 0 | 1  | 0  | 433252   | 8.17E-01 | 1 |
| GFOD1   | 258422  | 407 | 37  | 963336  | 293700 | 0 | 2 | 2 | 0 | 31 | 36 | 11478864 | 8.17E-01 | 1 |
| FKBPL   | 2170336 | 224 | 32  | 854756  | 273052 | 0 | 2 | 0 | 0 | 19 | 28 | 8032784  | 8.17E-01 | 1 |
| ZNF438  | 89942   | 603 | 20  | 2092568 | 590248 | 0 | 6 | 1 | 0 | 50 | 66 | 20225072 | 8.17E-01 | 1 |

|           |         |     |     |         |         |   |    |   |   |    |     |          |          |   |
|-----------|---------|-----|-----|---------|---------|---|----|---|---|----|-----|----------|----------|---|
| NFIX      | 1914702 | 221 | 41  | 1125316 | 331436  | 0 | 2  | 1 | 0 | 50 | 57  | 21745904 | 8.17E-01 | 1 |
| CDC16     | 612511  | 283 | 46  | 1665368 | 401212  | 0 | 3  | 1 | 0 | 50 | 47  | 21694284 | 8.17E-01 | 1 |
| MZF1      | 2673870 | 276 | 11  | 1799936 | 576364  | 0 | 5  | 3 | 0 | 11 | 16  | 4808492  | 8.17E-01 | 1 |
| KIAA0556  | 349212  | 620 | 12  | 4139924 | 1164832 | 0 | 10 | 4 | 0 | 14 | 12  | 5410844  | 8.17E-01 | 1 |
| ABCA7     | 2387949 | 206 | 26  | 5322200 | 1749028 | 0 | 9  | 7 | 0 | 12 | 24  | 8124276  | 8.17E-01 | 1 |
| DDX21     | 860888  | 246 | 52  | 2034184 | 539696  | 0 | 7  | 2 | 0 | 50 | 61  | 18490996 | 8.17E-01 | 1 |
| PYROXD2   | 142644  | 581 | 4   | 1489504 | 441440  | 0 | 1  | 1 | 0 | 50 | 67  | 24359656 | 8.17E-01 | 1 |
| KRT78     | 1781225 | 288 | 27  | 1321472 | 384124  | 0 | 4  | 1 | 0 | 13 | 20  | 5681404  | 8.17E-01 | 1 |
| UCK1      | 609539  | 272 | 36  | 740836  | 177644  | 0 | 1  | 0 | 0 | 50 | 50  | 21880116 | 8.17E-01 | 1 |
| FYN       | 245639  | 317 | 21  | 1531868 | 409756  | 0 | 3  | 2 | 0 | 13 | 13  | 5621596  | 8.17E-01 | 1 |
| ZBTB1     | 666489  | 188 | 45  | 1886088 | 447492  | 0 | 6  | 0 | 0 | 18 | 19  | 7262756  | 8.17E-01 | 1 |
| GPR83     | 299664  | 704 | -13 | 1058388 | 312924  | 0 | 2  | 1 | 0 | 50 | 57  | 18892208 | 8.17E-01 | 1 |
| RAB11FIP4 | 489748  | 460 | 18  | 1597016 | 515488  | 0 | 3  | 4 | 0 | 27 | 27  | 8658276  | 8.17E-01 | 1 |
| KCNK16    | 190767  | 749 | 31  | 1094344 | 333572  | 0 | 2  | 0 | 0 | 50 | 54  | 20647288 | 8.18E-01 | 1 |
| OR1J1     | 373314  | 646 | 3   | 790320  | 243504  | 0 | 1  | 0 | 0 | 50 | 63  | 22349324 | 8.18E-01 | 1 |
| BID       | 395559  | 280 | -18 | 617660  | 179068  | 0 | 1  | 1 | 0 | 50 | 67  | 23231848 | 8.18E-01 | 1 |
| BEST2     | 1959466 | 226 | 29  | 1279108 | 389108  | 0 | 3  | 0 | 0 | 50 | 74  | 23429072 | 8.18E-01 | 1 |
| PYCR2     | 923085  | 239 | 20  | 800288  | 253828  | 0 | 1  | 1 | 0 | 50 | 52  | 17968032 | 8.18E-01 | 1 |
| DCUN1D1   | 232043  | 574 | 13  | 707016  | 153792  | 0 | 1  | 0 | 0 | 50 | 43  | 17563616 | 8.18E-01 | 1 |
| PLA2G3    | 731144  | 218 | 40  | 1279108 | 380564  | 0 | 4  | 2 | 0 | 2  | 2   | 975796   | 8.18E-01 | 1 |
| SASH1     | 77939   | 454 | -8  | 3164840 | 914920  | 0 | 8  | 2 | 0 | 50 | 55  | 19870852 | 8.18E-01 | 1 |
| SGCA      | 1277832 | 210 | 26  | 973660  | 310076  | 0 | 2  | 0 | 0 | 50 | 71  | 23861612 | 8.18E-01 | 1 |
| HTR3A     | 175442  | 586 | 1   | 1324676 | 389464  | 0 | 2  | 0 | 0 | 47 | 45  | 19577508 | 8.18E-01 | 1 |
| FEM1A     | 798897  | 203 | 23  | 1618376 | 528304  | 0 | 3  | 2 | 0 | 50 | 51  | 20192320 | 8.18E-01 | 1 |
| SPRED3    | 1467279 | 253 | 0   | 1022432 | 358492  | 0 | 2  | 1 | 0 | 18 | 15  | 5595252  | 8.18E-01 | 1 |
| SNX32     | 3779084 | 287 | 42  | 1050556 | 295124  | 0 | 5  | 1 | 0 | 2  | 2   | 703456   | 8.18E-01 | 1 |
| SLC25A45  | 4112809 | 242 | 50  | 727308  | 224280  | 0 | 1  | 1 | 0 | 27 | 30  | 12483852 | 8.18E-01 | 1 |
| NXF5      | 272029  | NaN | 23  | 988968  | 240300  | 0 | 2  | 1 | 0 | 50 | 72  | 24362148 | 8.18E-01 | 1 |
| CTDSPL    | 408788  | 457 | 22  | 724816  | 194732  | 0 | 1  | 1 | 0 | 50 | 57  | 23271720 | 8.18E-01 | 1 |
| CSF2RA    | NaN     | NaN | NaN | 1351376 | 330724  | 0 | 3  | 2 | 0 | 50 | 118 | 39976308 | 8.18E-01 | 1 |
| ABHD8     | 842088  | 211 | 43  | 1076544 | 350304  | 0 | 2  | 2 | 0 | 50 | 61  | 21639816 | 8.18E-01 | 1 |
| ZGPAT     | 1126597 | 202 | 36  | 1319692 | 410468  | 0 | 4  | 3 | 0 | 15 | 17  | 5909600  | 8.18E-01 | 1 |
| U2AF2     | 1077402 | 254 | -10 | 1225708 | 346388  | 0 | 4  | 1 | 0 | 8  | 8   | 2559640  | 8.19E-01 | 1 |



|          |         |     |     |         |         |   |    |   |   |    |    |          |          |   |
|----------|---------|-----|-----|---------|---------|---|----|---|---|----|----|----------|----------|---|
| TRIM56   | 1066804 | 272 | 39  | 1801360 | 624068  | 0 | 5  | 2 | 0 | 50 | 83 | 23088024 | 8.19E-01 | 1 |
| MLC1     | 909819  | 215 | 25  | 965472  | 292632  | 0 | 3  | 3 | 0 | 7  | 11 | 2349244  | 8.19E-01 | 1 |
| SACM1L   | 319452  | 385 | 45  | 1580996 | 384124  | 0 | 3  | 1 | 0 | 50 | 56 | 20846292 | 8.19E-01 | 1 |
| TMIGD1   | 475180  | 232 | 26  | 690640  | 177644  | 0 | 3  | 2 | 0 | 28 | 50 | 10398048 | 8.19E-01 | 1 |
| ZEB2     | 56402   | 621 | 16  | 3127460 | 803848  | 0 | 13 | 5 | 0 | 28 | 37 | 10396980 | 8.19E-01 | 1 |
| STRA6    | 530359  | 220 | 45  | 1725532 | 542900  | 0 | 2  | 0 | 0 | 21 | 12 | 7934528  | 8.19E-01 | 1 |
| PPP2R5B  | 3184873 | 209 | 57  | 1277684 | 369172  | 0 | 4  | 4 | 0 | 11 | 22 | 4645800  | 8.19E-01 | 1 |
| ZNF711   | 90533   | NaN | 1   | 1981852 | 489500  | 0 | 4  | 0 | 0 | 7  | 7  | 2914216  | 8.19E-01 | 1 |
| TIAM1    | 210411  | 924 | -24 | 4077268 | 1130300 | 0 | 15 | 6 | 0 | 45 | 92 | 20411972 | 8.19E-01 | 1 |
| ADAL     | 823006  | 415 | 50  | 965828  | 245284  | 0 | 2  | 0 | 0 | 50 | 74 | 24588920 | 8.19E-01 | 1 |
| ACPT     | 652250  | 593 | 27  | 1048064 | 364900  | 0 | 2  | 1 | 0 | 50 | 64 | 22467160 | 8.19E-01 | 1 |
| SPG7     | 1107401 | 203 | 39  | 2145256 | 633680  | 0 | 5  | 4 | 0 | 21 | 23 | 6867240  | 8.19E-01 | 1 |
| SOX17    | 240943  | 554 | -8  | 1009260 | 324672  | 0 | 2  | 1 | 0 | 50 | 63 | 21777588 | 8.19E-01 | 1 |
| USP34    | 841742  | 471 | 34  | 9380244 | 2323968 | 0 | 29 | 3 | 0 | 1  | 4  | 2886092  | 8.19E-01 | 1 |
| KIAA1755 | 499325  | 245 | 60  | 2964412 | 939128  | 0 | 6  | 1 | 0 | 12 | 10 | 5388060  | 8.19E-01 | 1 |
| REPS1    | 310511  | 613 | 16  | 2053764 | 580992  | 0 | 4  | 0 | 0 | 37 | 39 | 21180932 | 8.20E-01 | 1 |
| PALM2    | 276166  | 485 | 4   | 1073696 | 284800  | 0 | 2  | 0 | 0 | 12 | 18 | 7117152  | 8.20E-01 | 1 |
| FADS3    | 1998419 | 212 | 69  | 1158780 | 317196  | 0 | 2  | 2 | 0 | 9  | 15 | 4289444  | 8.20E-01 | 1 |
| RNF139   | 472766  | 476 | 28  | 1657180 | 477752  | 0 | 3  | 0 | 0 | 17 | 13 | 5575672  | 8.20E-01 | 1 |
| GSDMA    | 1652518 | 216 | 28  | 1141692 | 334284  | 0 | 2  | 0 | 0 | 50 | 67 | 22696068 | 8.20E-01 | 1 |
| ABHD2    | 639252  | 388 | 22  | 1106804 | 296548  | 0 | 2  | 0 | 0 | 50 | 72 | 26774404 | 8.20E-01 | 1 |
| HAX1     | 1653296 | 236 | 29  | 726952  | 195800  | 0 | 1  | 0 | 0 | 50 | 69 | 22962712 | 8.20E-01 | 1 |
| AWAT1    | 161347  | NaN | 27  | 853332  | 228552  | 0 | 1  | 0 | 0 | 50 | 47 | 22645516 | 8.20E-01 | 1 |
| BGN      | 971101  | NaN | 7   | 942332  | 269848  | 0 | 2  | 1 | 0 | 50 | 42 | 13736972 | 8.20E-01 | 1 |
| BUB1B    | 876373  | 161 | 42  | 2756508 | 707016  | 0 | 7  | 3 | 0 | 50 | 50 | 20747680 | 8.20E-01 | 1 |
| AADAC    | 200470  | 526 | 2   | 1017448 | 283376  | 0 | 2  | 2 | 0 | 9  | 6  | 2714856  | 8.20E-01 | 1 |
| HDAC2    | 217826  | 610 | 14  | 1316488 | 305804  | 0 | 3  | 1 | 0 | 32 | 43 | 13809596 | 8.20E-01 | 1 |
| LMNA     | 2150035 | 180 | 39  | 1686728 | 513352  | 0 | 5  | 3 | 0 | 4  | 8  | 2049848  | 8.20E-01 | 1 |
| ZNF551   | 606379  | 849 | -44 | 1695272 | 411892  | 0 | 6  | 2 | 0 | 50 | 65 | 17258880 | 8.20E-01 | 1 |
| EGR3     | 765839  | 325 | 52  | 962624  | 284800  | 0 | 2  | 2 | 0 | 22 | 17 | 6163784  | 8.20E-01 | 1 |
| ZNF304   | 432083  | 869 | -17 | 1698832 | 424352  | 0 | 5  | 0 | 0 | 47 | 53 | 17112920 | 8.20E-01 | 1 |
| XKR4     | 93897   | 925 | -13 | 1613392 | 483092  | 0 | 4  | 1 | 0 | 50 | 69 | 23504188 | 8.20E-01 | 1 |
| AUH      | 124246  | 342 | 24  | 869352  | 260592  | 0 | 1  | 0 | 0 | 27 | 24 | 10683916 | 8.21E-01 | 1 |

|         |         |      |     |         |         |   |    |   |   |    |    |          |          |   |
|---------|---------|------|-----|---------|---------|---|----|---|---|----|----|----------|----------|---|
| SIDT2   | 426428  | 228  | 46  | 2176228 | 601640  | 0 | 2  | 2 | 0 | 50 | 39 | 17316908 | 8.21E-01 | 1 |
| SCRT1   | 2525749 | 200  | 28  | 836244  | 286224  | 0 | 1  | 0 | 0 | 50 | 56 | 26181308 | 8.21E-01 | 1 |
| DNASE2  | 1937827 | 226  | 32  | 914208  | 263796  | 0 | 2  | 1 | 0 | 50 | 71 | 21091932 | 8.21E-01 | 1 |
| SLITRK3 | 26494   | 1315 | -17 | 2412256 | 725528  | 0 | 9  | 4 | 0 | 23 | 27 | 8431148  | 8.21E-01 | 1 |
| DDX24   | 200295  | 605  | 47  | 2181212 | 608404  | 0 | 8  | 4 | 0 | 33 | 44 | 12874740 | 8.21E-01 | 1 |
| ADAM30  | 390094  | 560  | 9   | 1994312 | 540052  | 0 | 7  | 2 | 0 | 50 | 69 | 20372456 | 8.21E-01 | 1 |
| P2RX7   | 1061231 | 396  | 46  | 1559992 | 402992  | 0 | 3  | 2 | 0 | 50 | 66 | 18904312 | 8.21E-01 | 1 |
| NT5DC3  | 1181243 | 358  | 15  | 1449632 | 367036  | 0 | 4  | 2 | 0 | 50 | 79 | 22436188 | 8.21E-01 | 1 |
| RAB32   | 56448   | 901  | -33 | 576008  | 156640  | 0 | 2  | 2 | 0 | 28 | 48 | 9227164  | 8.21E-01 | 1 |
| TAS2R38 | 198115  | 856  | -6  | 824852  | 249556  | 0 | 1  | 1 | 0 | 50 | 61 | 21007204 | 8.21E-01 | 1 |
| SLC5A8  | 261778  | 828  | -15 | 1566400 | 451052  | 0 | 5  | 0 | 0 | 26 | 33 | 10061984 | 8.21E-01 | 1 |
| NEK3    | 397134  | 432  | 30  | 1359564 | 328944  | 0 | 2  | 1 | 0 | 30 | 29 | 13552564 | 8.21E-01 | 1 |
| NAE1    | 868790  | 142  | 24  | 1487012 | 354220  | 0 | 4  | 1 | 0 | 50 | 59 | 19451484 | 8.21E-01 | 1 |
| KPRP    | 64902   | 818  | 18  | 1422576 | 440016  | 0 | 11 | 1 | 0 | 2  | 2  | 609828   | 8.21E-01 | 1 |
| NR2E3   | 1039394 | 440  | 25  | 1038452 | 311500  | 0 | 2  | 0 | 0 | 2  | 0  | 815952   | 8.21E-01 | 1 |
| CACNG2  | 1202913 | 359  | 42  | 816664  | 234248  | 0 | 3  | 2 | 0 | 18 | 29 | 6160936  | 8.21E-01 | 1 |
| FBXW9   | 1967616 | 218  | 15  | 1143472 | 367748  | 0 | 3  | 3 | 0 | 5  | 16 | 3885740  | 8.21E-01 | 1 |
| BEND4   | 263825  | 496  | 24  | 1339628 | 391600  | 0 | 2  | 0 | 0 | 50 | 47 | 19155292 | 8.21E-01 | 1 |
| SLC17A9 | 961230  | 336  | 40  | 1117484 | 333928  | 0 | 1  | 1 | 0 | 50 | 82 | 23029640 | 8.21E-01 | 1 |
| MYH8    | 80361   | 731  | -49 | 5091512 | 1280176 | 0 | 16 | 1 | 0 | 2  | 10 | 3856548  | 8.21E-01 | 1 |
| PPP2R5A | 485902  | 298  | 16  | 1294060 | 317552  | 0 | 3  | 0 | 0 | 13 | 12 | 4540424  | 8.21E-01 | 1 |
| CRIPAK  | 1018381 | 507  | 41  | 1075120 | 357068  | 0 | 2  | 0 | 0 | 32 | 50 | 18344324 | 8.22E-01 | 1 |
| PI4KB   | 1256374 | 184  | 31  | 2098264 | 606980  | 0 | 9  | 1 | 0 | 4  | 14 | 2831624  | 8.22E-01 | 1 |
| UPP2    | 115042  | 838  | -4  | 973660  | 264152  | 0 | 3  | 1 | 0 | 50 | 65 | 19143544 | 8.22E-01 | 1 |
| EXOSC1  | 724294  | 188  | 40  | 520828  | 139196  | 0 | 1  | 1 | 0 | 16 | 27 | 8144924  | 8.22E-01 | 1 |
| CABIN1  | 749515  | 202  | 40  | 5615544 | 1654332 | 0 | 7  | 2 | 0 | 1  | 2  | 2048780  | 8.22E-01 | 1 |
| SLC36A2 | 821078  | 530  | 48  | 1220012 | 369172  | 0 | 2  | 2 | 0 | 50 | 54 | 22128960 | 8.22E-01 | 1 |
| ODF4    | 772200  | 257  | 20  | 655752  | 179424  | 0 | 1  | 0 | 0 | 50 | 52 | 17300532 | 8.22E-01 | 1 |
| OR4N5   | 371813  | 563  | -29 | 759704  | 229264  | 0 | 1  | 2 | 0 | 15 | 16 | 5073712  | 8.22E-01 | 1 |
| EID3    | NaN     | NaN  | NaN | 845144  | 224992  | 0 | 2  | 2 | 0 | 26 | 42 | 11802112 | 8.22E-01 | 1 |
| ZNF397  | 260556  | 599  | 7   | 1634040 | 400500  | 0 | 2  | 0 | 0 | 50 | 41 | 21849856 | 8.22E-01 | 1 |
| PCDH7   | 28650   | 682  | 6   | 3156296 | 962980  | 0 | 7  | 3 | 0 | 50 | 55 | 25571480 | 8.23E-01 | 1 |
| CLEC16A | 378690  | 430  | 37  | 2715568 | 755432  | 0 | 7  | 3 | 0 | 50 | 72 | 21806068 | 8.23E-01 | 1 |

|          |         |     |     |         |         |   |    |   |   |    |    |          |          |   |
|----------|---------|-----|-----|---------|---------|---|----|---|---|----|----|----------|----------|---|
| EBF1     | 123440  | 728 | 39  | 1537564 | 423284  | 0 | 4  | 1 | 0 | 50 | 62 | 18899328 | 8.23E-01 | 1 |
| APOC3    | 421374  | 323 | 39  | 261304  | 71912   | 0 | 2  | 1 | 0 | 1  | 2  | 262372   | 8.23E-01 | 1 |
| DOLK     | 1517799 | 203 | 29  | 1284092 | 442864  | 0 | 2  | 2 | 0 | 50 | 43 | 19078752 | 8.23E-01 | 1 |
| SEC16B   | 103475  | 499 | -10 | 2736572 | 769672  | 0 | 7  | 1 | 0 | 16 | 25 | 8369560  | 8.23E-01 | 1 |
| CHST12   | 792353  | 251 | 35  | 1024568 | 309364  | 0 | 3  | 1 | 0 | 50 | 73 | 22042808 | 8.23E-01 | 1 |
| SHC2     | 1370962 | 423 | -24 | 1451412 | 467784  | 0 | 3  | 0 | 0 | 7  | 6  | 2945900  | 8.23E-01 | 1 |
| LGI3     | 587455  | 196 | 50  | 1372736 | 416164  | 0 | 4  | 2 | 0 | 50 | 67 | 20087300 | 8.23E-01 | 1 |
| SLC47A1  | 558023  | 414 | 2   | 1458176 | 441796  | 0 | 3  | 2 | 0 | 50 | 52 | 18951660 | 8.23E-01 | 1 |
| SIDT1    | 466309  | 468 | 21  | 2171600 | 583840  | 0 | 7  | 2 | 0 | 43 | 39 | 13685708 | 8.23E-01 | 1 |
| ALLC     | 252769  | 496 | 5   | 1026704 | 276256  | 0 | 1  | 1 | 0 | 50 | 54 | 24675428 | 8.23E-01 | 1 |
| HABP2    | 189589  | 596 | 2   | 1487368 | 362408  | 0 | 2  | 1 | 0 | 50 | 48 | 20896488 | 8.24E-01 | 1 |
| LOH12CR1 | 707022  | 279 | 27  | 508724  | 135280  | 0 | 3  | 2 | 0 | 2  | 5  | 1013888  | 8.24E-01 | 1 |
| ARHGEF12 | 264872  | 312 | 25  | 4064452 | 1058744 | 0 | 10 | 2 | 0 | 10 | 10 | 4549680  | 8.24E-01 | 1 |
| MAGEA4   | 125659  | NaN | -21 | 782132  | 241012  | 0 | 2  | 1 | 0 | 37 | 49 | 12693536 | 8.24E-01 | 1 |
| PRKCH    | 312210  | 434 | 11  | 1776084 | 470988  | 0 | 4  | 1 | 0 | 50 | 56 | 21714932 | 8.24E-01 | 1 |
| ZNF276   | 1162469 | 219 | 39  | 1560704 | 454612  | 0 | 6  | 3 | 0 | 12 | 13 | 3733372  | 8.24E-01 | 1 |
| TUBA3C   | 193250  | 922 | -15 | 1132436 | 333928  | 0 | 3  | 2 | 0 | 34 | 35 | 10148492 | 8.24E-01 | 1 |
| TSPAN2   | 595238  | 555 | 4   | 581704  | 161624  | 0 | 1  | 1 | 0 | 50 | 89 | 28246820 | 8.24E-01 | 1 |
| ZMYM4    | 916800  | 406 | 19  | 4058044 | 1030976 | 0 | 12 | 1 | 0 | 0  | 1  | 1030976  | 8.24E-01 | 1 |
| KCNA3    | 318208  | 730 | 22  | 1398012 | 447492  | 0 | 4  | 4 | 0 | 3  | 11 | 2881464  | 8.24E-01 | 1 |
| CNNM3    | 879415  | 332 | 48  | 1701680 | 598792  | 0 | 4  | 2 | 0 | 50 | 74 | 25443320 | 8.24E-01 | 1 |
| DUSP15   | 1015946 | 241 | 37  | 595944  | 185832  | 0 | 1  | 0 | 0 | 50 | 52 | 17181628 | 8.24E-01 | 1 |
| GBX1     | 611046  | 337 | 38  | 867928  | 301532  | 0 | 2  | 0 | 0 | 11 | 15 | 4791048  | 8.24E-01 | 1 |
| CCPG1    | 267069  | 396 | 11  | 1987192 | 471344  | 0 | 2  | 0 | 0 | 42 | 54 | 21897204 | 8.24E-01 | 1 |
| TP73     | 249590  | 288 | 20  | 1717344 | 422928  | 0 | 3  | 3 | 0 | 5  | 4  | 2676408  | 8.24E-01 | 1 |
| RHOQ     | 595763  | 213 | 36  | 532932  | 144180  | 0 | 1  | 2 | 0 | 10 | 12 | 3712368  | 8.24E-01 | 1 |
| SYT12    | 1643265 | 152 | 47  | 1068712 | 313280  | 0 | 3  | 1 | 0 | 50 | 72 | 20561848 | 8.24E-01 | 1 |
| GP6      | 1125216 | 432 | -26 | 1601288 | 420436  | 0 | 2  | 1 | 0 | 46 | 55 | 18459668 | 8.24E-01 | 1 |
| TRIM16   | 471003  | 431 | -19 | 1442156 | 389464  | 0 | 1  | 2 | 0 | 50 | 54 | 19765476 | 8.24E-01 | 1 |
| IRF5     | 845100  | 361 | 49  | 1300112 | 384124  | 0 | 3  | 2 | 0 | 50 | 80 | 25321924 | 8.24E-01 | 1 |
| DSEL     | 18159   | 527 | -33 | 3096132 | 822360  | 0 | 12 | 2 | 0 | 19 | 31 | 7153820  | 8.24E-01 | 1 |
| LAD1     | 857879  | 209 | 26  | 1300112 | 398008  | 0 | 5  | 0 | 0 | 3  | 2  | 847636   | 8.25E-01 | 1 |
| GPR152   | 1392213 | 215 | 53  | 1117840 | 395516  | 0 | 2  | 1 | 0 | 11 | 7  | 3262740  | 8.25E-01 | 1 |

|          |         |      |     |         |         |   |    |   |   |    |     |          |          |   |
|----------|---------|------|-----|---------|---------|---|----|---|---|----|-----|----------|----------|---|
| KRT75    | 1194800 | 389  | 29  | 1392316 | 412604  | 0 | 4  | 1 | 0 | 50 | 64  | 18116128 | 8.25E-01 | 1 |
| κRTAP11- | 31443   | 1030 | -60 | 395872  | 131720  | 0 | 1  | 0 | 0 | 13 | 13  | 3304392  | 8.25E-01 | 1 |
| PTGFRN   | 760797  | 540  | 24  | 2192248 | 661448  | 0 | 4  | 1 | 0 | 31 | 58  | 19038168 | 8.25E-01 | 1 |
| AGMAT    | 656850  | 162  | 31  | 870776  | 285868  | 0 | 1  | 0 | 0 | 33 | 29  | 14413372 | 8.25E-01 | 1 |
| CHTF8    | 1179391 | 201  | 24  | 308652  | 95052   | 0 | 1  | 1 | 0 | 5  | 13  | 2574948  | 8.25E-01 | 1 |
| SLC37A4  | 1424132 | 180  | 57  | 1142760 | 344964  | 0 | 1  | 0 | 0 | 6  | 7   | 2842304  | 8.25E-01 | 1 |
| TGFB1    | 1193025 | 249  | 33  | 979000  | 299396  | 0 | 3  | 0 | 0 | 50 | 52  | 16514128 | 8.25E-01 | 1 |
| OR1N2    | 407749  | 646  | 9   | 806696  | 252760  | 0 | 2  | 1 | 0 | 50 | 67  | 20364980 | 8.25E-01 | 1 |
| OLFML1   | 108110  | 869  | 11  | 1015668 | 284088  | 0 | 3  | 3 | 0 | 10 | 22  | 4294428  | 8.25E-01 | 1 |
| SPTA1    | 177547  | 940  | 1   | 6368484 | 1603068 | 0 | 36 | 8 | 0 | 5  | 15  | 3331804  | 8.25E-01 | 1 |
| GOLGA4   | 409750  | 283  | 20  | 5961220 | 1387688 | 0 | 17 | 7 | 0 | 11 | 22  | 6459620  | 8.25E-01 | 1 |
| HYI      | 1044061 | 239  | 35  | 708796  | 213956  | 0 | 1  | 0 | 0 | 50 | 52  | 18519832 | 8.25E-01 | 1 |
| WNT11    | 265144  | 359  | 38  | 889288  | 265220  | 0 | 2  | 0 | 0 | 21 | 22  | 6791412  | 8.25E-01 | 1 |
| EEF2K    | 522343  | 235  | 44  | 1904600 | 494128  | 0 | 7  | 0 | 0 | 2  | 2   | 1237456  | 8.25E-01 | 1 |
| HSF1     | 2525749 | 200  | 28  | 1352088 | 397296  | 0 | 5  | 3 | 0 | 4  | 8   | 1894276  | 8.25E-01 | 1 |
| DOC2A    | NaN     | NaN  | NaN | 1022432 | 305092  | 0 | 2  | 2 | 0 | 50 | 118 | 39950676 | 8.25E-01 | 1 |
| FAM151B  | 320158  | 516  | 35  | 730156  | 178712  | 0 | 1  | 1 | 0 | 17 | 12  | 5536868  | 8.25E-01 | 1 |
| SMARCC1  | 843941  | 200  | 39  | 2892500 | 766468  | 0 | 9  | 2 | 0 | 50 | 59  | 19702108 | 8.25E-01 | 1 |
| EVI2B    | NaN     | NaN  | NaN | 1108940 | 333928  | 0 | 2  | 0 | 0 | 50 | 116 | 39979512 | 8.25E-01 | 1 |
| DERL1    | 470881  | 412  | 33  | 661448  | 175864  | 0 | 1  | 0 | 0 | 50 | 52  | 20461456 | 8.25E-01 | 1 |
| PKD1L2   | 290329  | 327  | 3   | 6273432 | 1859388 | 0 | 8  | 4 | 0 | 35 | 28  | 15576780 | 8.25E-01 | 1 |
| CDHR1    | 216191  | 860  | -17 | 2340700 | 696692  | 0 | 8  | 2 | 0 | 50 | 78  | 25295580 | 8.26E-01 | 1 |
| PABPN1L  | 860087  | 252  | 37  | 734784  | 218940  | 0 | 1  | 0 | 0 | 50 | 60  | 24489240 | 8.26E-01 | 1 |
| KCNJ10   | 829863  | 386  | 17  | 926668  | 292988  | 0 | 2  | 1 | 0 | 50 | 71  | 21371748 | 8.26E-01 | 1 |
| LGMN     | 423482  | 499  | 48  | 1150948 | 295124  | 0 | 2  | 0 | 0 | 50 | 51  | 19702820 | 8.26E-01 | 1 |
| TKT      | 782559  | 192  | 54  | 1607340 | 451764  | 0 | 2  | 0 | 0 | 2  | 0   | 1246000  | 8.26E-01 | 1 |
| AQP1     | 402058  | 568  | 10  | 873268  | 281240  | 0 | 2  | 1 | 0 | 50 | 61  | 18066288 | 8.26E-01 | 1 |
| RASSF4   | 75634   | 905  | 25  | 847992  | 226416  | 0 | 1  | 0 | 0 | 50 | 52  | 22092648 | 8.26E-01 | 1 |
| UBOX5    | 872596  | 192  | 54  | 1342476 | 411180  | 0 | 3  | 0 | 0 | 28 | 26  | 9830228  | 8.26E-01 | 1 |
| RAD9B    | 922262  | 206  | 43  | 1145252 | 279460  | 0 | 2  | 1 | 0 | 36 | 42  | 16644780 | 8.26E-01 | 1 |
| COL6A5   | 202934  | 533  | 11  | 6516224 | 1746892 | 0 | 11 | 0 | 0 | 3  | 2   | 2930592  | 8.26E-01 | 1 |
| HIP1R    | 977561  | 184  | 37  | 2766476 | 793168  | 0 | 6  | 4 | 0 | 50 | 67  | 22668656 | 8.26E-01 | 1 |
| VPS16    | 766497  | 396  | 44  | 2182992 | 610896  | 0 | 7  | 0 | 0 | 4  | 3   | 1699544  | 8.26E-01 | 1 |

|          |         |      |     |         |         |   |    |   |   |    |     |          |          |   |
|----------|---------|------|-----|---------|---------|---|----|---|---|----|-----|----------|----------|---|
| SEC14L2  | 676863  | 214  | 52  | 1144540 | 299396  | 0 | 2  | 1 | 0 | 50 | 63  | 21810340 | 8.26E-01 | 1 |
| DNAJB9   | 171249  | 838  | 6   | 587756  | 138484  | 0 | 1  | 1 | 0 | 36 | 35  | 12002896 | 8.26E-01 | 1 |
| OR10A4   | 427462  | 681  | 8   | 773944  | 242792  | 0 | 2  | 0 | 0 | 50 | 71  | 18227912 | 8.26E-01 | 1 |
| OR10A5   | 427462  | 681  | 8   | 782132  | 236740  | 0 | 2  | 1 | 0 | 50 | 71  | 18227912 | 8.26E-01 | 1 |
| ROR2     | 457045  | 572  | 30  | 2354940 | 703812  | 0 | 7  | 4 | 0 | 24 | 28  | 7763292  | 8.26E-01 | 1 |
| FRMD4A   | 212541  | 732  | 24  | 2679968 | 754720  | 0 | 7  | 4 | 0 | 13 | 16  | 5393400  | 8.26E-01 | 1 |
| URB2     | 299238  | 340  | 15  | 3782500 | 1142048 | 0 | 7  | 1 | 0 | 7  | 7   | 4475276  | 8.26E-01 | 1 |
| USP17L2  | 475312  | 625  | 3   | 1328236 | 373088  | 0 | 3  | 2 | 0 | 50 | 62  | 20793248 | 8.27E-01 | 1 |
| VCP      | 782447  | 350  | 42  | 2063732 | 590248  | 0 | 4  | 3 | 0 | 50 | 63  | 24855920 | 8.27E-01 | 1 |
| HOXD11   | 242935  | 874  | 15  | 826276  | 264152  | 0 | 2  | 0 | 0 | 50 | 65  | 19479964 | 8.27E-01 | 1 |
| PDHA1    | 216523  | NaN  | 39  | 1132436 | 311500  | 0 | 3  | 2 | 0 | 17 | 28  | 8194764  | 8.27E-01 | 1 |
| CWH43    | 246165  | 439  | 49  | 1813464 | 493416  | 0 | 5  | 3 | 0 | 14 | 24  | 8547916  | 8.27E-01 | 1 |
| TMEM11   | 416965  | 517  | -27 | 474192  | 148452  | 0 | 1  | 0 | 0 | 50 | 71  | 19737708 | 8.27E-01 | 1 |
| PNLIPRP2 | 161760  | 618  | -16 | 1242084 | 321468  | 0 | 3  | 2 | 0 | 19 | 24  | 7721640  | 8.27E-01 | 1 |
| MAGEA10  | 191719  | NaN  | -20 | 924176  | 267712  | 0 | 2  | 2 | 0 | 14 | 11  | 3714148  | 8.27E-01 | 1 |
| CDR2L    | 1078189 | 171  | 28  | 1157712 | 352440  | 0 | 2  | 3 | 0 | 50 | 72  | 16166672 | 8.27E-01 | 1 |
| SIX2     | 74076   | 508  | 23  | 715916  | 223924  | 0 | 1  | 1 | 0 | 37 | 34  | 14192652 | 8.27E-01 | 1 |
| OR51B4   | 100115  | 1056 | 1   | 765044  | 230332  | 0 | 1  | 1 | 0 | 30 | 18  | 7873652  | 8.27E-01 | 1 |
| NSFL1C   | 397239  | 386  | 42  | 962268  | 260592  | 0 | 5  | 2 | 0 | 1  | 2   | 515132   | 8.27E-01 | 1 |
| OR2T35   | 141426  | 710  | -10 | 788896  | 249200  | 0 | 1  | 0 | 0 | 50 | 70  | 30005816 | 8.27E-01 | 1 |
| TRIT1    | 996021  | 270  | 31  | 1216452 | 327876  | 0 | 4  | 2 | 0 | 15 | 20  | 6653284  | 8.27E-01 | 1 |
| ADCY3    | 284877  | 296  | 37  | 2919912 | 836244  | 0 | 4  | 3 | 0 | 50 | 44  | 18472128 | 8.27E-01 | 1 |
| CYP8B1   | 301212  | 447  | 21  | 1245288 | 363120  | 0 | 2  | 2 | 0 | 43 | 60  | 20254976 | 8.27E-01 | 1 |
| CEBPG    | 302640  | 510  | -21 | 385192  | 102884  | 0 | 1  | 1 | 0 | 10 | 44  | 8616624  | 8.27E-01 | 1 |
| MECP2    | 2370576 | NaN  | 29  | 1252764 | 390888  | 0 | 2  | 1 | 0 | 50 | 69  | 29055296 | 8.28E-01 | 1 |
| PSMB9    | 1253457 | 401  | 26  | 555716  | 172660  | 0 | 1  | 0 | 0 | 50 | 63  | 19067004 | 8.28E-01 | 1 |
| PEX11A   | 880974  | 190  | 35  | 621932  | 183340  | 0 | 1  | 0 | 0 | 50 | 61  | 22286312 | 8.28E-01 | 1 |
| TTF1     | 1431869 | 429  | 34  | 2347108 | 598436  | 0 | 5  | 3 | 0 | 50 | 60  | 18365328 | 8.28E-01 | 1 |
| STT3B    | 270559  | 511  | -4  | 2145256 | 566396  | 0 | 4  | 1 | 0 | 23 | 19  | 8534388  | 8.28E-01 | 1 |
| SCRIB    | 2182434 | 229  | 28  | 4090796 | 1370956 | 0 | 14 | 4 | 0 | 50 | 80  | 25006864 | 8.28E-01 | 1 |
| ZNF860   | NaN     | NaN  | NaN | 1635820 | 392312  | 0 | 5  | 0 | 0 | 50 | 116 | 40037896 | 8.28E-01 | 1 |
| ABCD1    | 1910154 | NaN  | 37  | 1829484 | 599148  | 0 | 4  | 2 | 0 | 50 | 67  | 22713868 | 8.28E-01 | 1 |
| DENND2D  | 400425  | 627  | 41  | 1229980 | 329300  | 0 | 3  | 1 | 0 | 50 | 66  | 20484952 | 8.28E-01 | 1 |

|         |         |     |     |         |         |   |    |   |   |    |     |          |          |   |
|---------|---------|-----|-----|---------|---------|---|----|---|---|----|-----|----------|----------|---|
| BAAT    | 112947  | 898 | -22 | 1042012 | 313280  | 0 | 3  | 1 | 0 | 12 | 13  | 4649716  | 8.28E-01 | 1 |
| PPAPDC3 | 745091  | 213 | 50  | 654684  | 221076  | 0 | 1  | 0 | 0 | 50 | 53  | 18357496 | 8.28E-01 | 1 |
| DIO3    | 1315103 | 577 | -26 | 741548  | 235672  | 0 | 2  | 0 | 0 | 50 | 77  | 19026776 | 8.28E-01 | 1 |
| DPP9    | 860250  | 203 | 29  | 2317204 | 629408  | 0 | 6  | 1 | 0 | 35 | 67  | 19910368 | 8.28E-01 | 1 |
| PIP     | 321366  | 568 | -9  | 384124  | 103952  | 0 | 1  | 1 | 0 | 9  | 11  | 2748676  | 8.28E-01 | 1 |
| UNC45B  | 634684  | 498 | 20  | 2373452 | 693844  | 0 | 8  | 4 | 0 | 50 | 64  | 19807840 | 8.28E-01 | 1 |
| DNAJB14 | 202808  | 682 | 36  | 1003564 | 243860  | 0 | 2  | 0 | 0 | 50 | 66  | 21102256 | 8.28E-01 | 1 |
| N4BP2L1 | 226626  | 435 | 53  | 716984  | 161980  | 0 | 1  | 0 | 0 | 50 | 62  | 24158872 | 8.28E-01 | 1 |
| OR7E24  | 398878  | 582 | -50 | 841584  | 247776  | 0 | 2  | 1 | 0 | 50 | 116 | 31105500 | 8.28E-01 | 1 |
| ARMC2   | 414039  | 431 | 32  | 2246360 | 607336  | 0 | 3  | 1 | 0 | 5  | 2   | 2568540  | 8.28E-01 | 1 |
| HERPUD1 | 820472  | 125 | 47  | 1005344 | 280528  | 0 | 2  | 1 | 0 | 50 | 77  | 25691452 | 8.28E-01 | 1 |
| ISPD    | 285724  | 921 | -20 | 1164120 | 322536  | 0 | 3  | 0 | 0 | 11 | 30  | 6047372  | 8.28E-01 | 1 |
| ZNF200  | 1493009 | 253 | 42  | 1022788 | 263084  | 0 | 2  | 1 | 0 | 50 | 77  | 26841332 | 8.29E-01 | 1 |
| JMJD6   | 827288  | 206 | 22  | 1075832 | 281596  | 0 | 2  | 2 | 0 | 50 | 41  | 14517680 | 8.29E-01 | 1 |
| ATOH8   | 1105419 | 181 | 46  | 763620  | 276612  | 0 | 1  | 2 | 0 | 21 | 27  | 10587440 | 8.29E-01 | 1 |
| SHROOM1 | 718028  | 356 | 58  | 2041660 | 721256  | 0 | 4  | 1 | 0 | 37 | 29  | 12992220 | 8.29E-01 | 1 |
| RNF114  | 589377  | 181 | 48  | 599860  | 157352  | 0 | 1  | 1 | 0 | 50 | 58  | 18928164 | 8.29E-01 | 1 |
| MPZL3   | 805791  | 211 | 41  | 607692  | 171948  | 0 | 1  | 1 | 0 | 50 | 62  | 21266728 | 8.29E-01 | 1 |
| ERI1    | 147910  | 440 | 44  | 918480  | 228552  | 0 | 1  | 0 | 0 | 24 | 35  | 12300868 | 8.29E-01 | 1 |
| NOXO1   | 1747301 | 183 | 46  | 924888  | 317196  | 0 | 2  | 1 | 0 | 50 | 75  | 19137492 | 8.29E-01 | 1 |
| SLAMF6  | 1145424 | 590 | 26  | 863300  | 235672  | 0 | 2  | 0 | 0 | 50 | 77  | 21751956 | 8.29E-01 | 1 |
| TMEM59  | 438316  | 201 | 29  | 840516  | 227484  | 0 | 2  | 1 | 0 | 26 | 33  | 9053080  | 8.29E-01 | 1 |
| A1CF    | 113129  | 613 | 19  | 1631904 | 459240  | 0 | 4  | 2 | 0 | 50 | 64  | 20119340 | 8.29E-01 | 1 |
| SURF4   | 1827885 | 416 | 28  | 693844  | 192596  | 0 | 1  | 1 | 0 | 50 | 47  | 17145316 | 8.29E-01 | 1 |
| NDST3   | 150671  | 985 | -20 | 2262736 | 588824  | 0 | 7  | 3 | 0 | 50 | 78  | 20142124 | 8.29E-01 | 1 |
| HCRTR1  | 1061386 | 197 | 37  | 1058032 | 332504  | 0 | 2  | 1 | 0 | 50 | 49  | 17656888 | 8.29E-01 | 1 |
| POMC    | 319647  | 280 | 37  | 671060  | 196156  | 0 | 1  | 1 | 0 | 40 | 37  | 14099736 | 8.29E-01 | 1 |
| NAB2    | 2026922 | 199 | 41  | 1290856 | 420080  | 0 | 1  | 1 | 0 | 50 | 67  | 21271000 | 8.29E-01 | 1 |
| LIN52   | 541052  | 236 | 43  | 319688  | 78676   | 0 | 1  | 1 | 0 | 2  | 4   | 1058032  | 8.29E-01 | 1 |
| KRT73   | 1441383 | 464 | 29  | 1371312 | 398364  | 0 | 4  | 4 | 0 | 10 | 11  | 3503396  | 8.29E-01 | 1 |
| POLR1A  | 983860  | 391 | 46  | 4430064 | 1224996 | 0 | 15 | 6 | 0 | 50 | 77  | 22499556 | 8.29E-01 | 1 |
| FCGR1A  | NaN     | NaN | NaN | 986832  | 272340  | 0 | 2  | 0 | 0 | 50 | 116 | 39917924 | 8.30E-01 | 1 |
| RTN4R   | 530222  | 292 | 44  | 1117484 | 405484  | 0 | 2  | 1 | 0 | 5  | 5   | 2629416  | 8.30E-01 | 1 |

|           |         |     |     |         |         |   |    |   |   |    |    |          |          |   |
|-----------|---------|-----|-----|---------|---------|---|----|---|---|----|----|----------|----------|---|
| NFXL1     | 186668  | 602 | 41  | 2411188 | 604844  | 0 | 7  | 1 | 0 | 7  | 5  | 2114284  | 8.30E-01 | 1 |
| SPI1      | 1106152 | 245 | 46  | 706304  | 182272  | 0 | 1  | 0 | 0 | 50 | 78 | 25933888 | 8.30E-01 | 1 |
| ARSF      | 217524  | NaN | -11 | 1511220 | 425064  | 0 | 3  | 1 | 0 | 50 | 64 | 23203012 | 8.30E-01 | 1 |
| AKT2      | 1005838 | 400 | 30  | 1265936 | 333928  | 0 | 2  | 0 | 0 | 38 | 34 | 14222556 | 8.30E-01 | 1 |
| B3GNT8    | 1104034 | 376 | 38  | 940908  | 338556  | 0 | 3  | 0 | 0 | 42 | 61 | 14196212 | 8.30E-01 | 1 |
| FBLN1     | 448796  | 195 | 3   | 2233544 | 598792  | 0 | 8  | 0 | 0 | 12 | 12 | 4270220  | 8.30E-01 | 1 |
| MED29     | 1748498 | 252 | 32  | 559632  | 166608  | 0 | 1  | 0 | 0 | 50 | 78 | 23410916 | 8.30E-01 | 1 |
| CYP17A1   | 883280  | 188 | 44  | 1292992 | 367748  | 0 | 3  | 0 | 0 | 28 | 27 | 10116096 | 8.30E-01 | 1 |
| SDHB      | 678965  | 221 | 52  | 738344  | 191884  | 0 | 1  | 1 | 0 | 50 | 57 | 20959500 | 8.30E-01 | 1 |
| ACER2     | 496889  | 421 | 24  | 712356  | 193308  | 0 | 1  | 1 | 0 | 50 | 58 | 23254276 | 8.31E-01 | 1 |
| PRDM15    | 279380  | 366 | 35  | 3912796 | 1051268 | 0 | 7  | 2 | 0 | 32 | 19 | 10777544 | 8.31E-01 | 1 |
| PLIN5     | 2111443 | 278 | 43  | 1148812 | 367748  | 0 | 1  | 2 | 0 | 50 | 77 | 21475344 | 8.31E-01 | 1 |
| IIST1H2BI | 267617  | 634 | 32  | 315060  | 96120   | 0 | 1  | 3 | 0 | 8  | 13 | 1153440  | 8.31E-01 | 1 |
| UBE2C     | 742720  | 180 | 48  | 597368  | 164116  | 0 | 1  | 0 | 0 | 50 | 49 | 15404476 | 8.31E-01 | 1 |
| FBXO10    | 511883  | 338 | 34  | 2409052 | 699896  | 0 | 4  | 2 | 0 | 50 | 53 | 19482100 | 8.31E-01 | 1 |
| RAB5C     | 2150553 | 206 | 33  | 562480  | 154148  | 0 | 1  | 1 | 0 | 50 | 72 | 21985492 | 8.31E-01 | 1 |
| ALDH1B1   | 272380  | 622 | 3   | 1271276 | 392668  | 0 | 2  | 1 | 0 | 50 | 46 | 19139984 | 8.31E-01 | 1 |
| TRAF4     | 1695792 | 208 | 40  | 1192244 | 342472  | 0 | 3  | 0 | 0 | 6  | 7  | 2121760  | 8.31E-01 | 1 |
| GALK1     | 1885370 | 198 | 27  | 971524  | 319688  | 0 | 2  | 2 | 0 | 50 | 68 | 21651920 | 8.31E-01 | 1 |
| CIDEB     | 915114  | 220 | 38  | 555004  | 171236  | 0 | 1  | 0 | 0 | 50 | 69 | 21077692 | 8.31E-01 | 1 |
| SIGLEC10  | 393294  | 583 | 17  | 1745468 | 533644  | 0 | 9  | 5 | 0 | 3  | 8  | 1627988  | 8.31E-01 | 1 |
| S1PR4     | 908206  | 241 | 21  | 899968  | 335708  | 0 | 2  | 3 | 0 | 21 | 23 | 7152040  | 8.31E-01 | 1 |
| CEP250    | 1521661 | 167 | 53  | 6205792 | 1755080 | 0 | 15 | 9 | 0 | 26 | 29 | 11106844 | 8.31E-01 | 1 |
| PCSK9     | 447775  | 230 | 13  | 1721616 | 545748  | 0 | 5  | 2 | 0 | 50 | 77 | 25253928 | 8.31E-01 | 1 |
| TMEM30A   | 394127  | 423 | -3  | 932364  | 253116  | 0 | 1  | 2 | 0 | 50 | 59 | 20882960 | 8.31E-01 | 1 |
| CABP1     | 1678287 | 311 | 38  | 1099328 | 361696  | 0 | 2  | 1 | 0 | 50 | 55 | 20293424 | 8.31E-01 | 1 |
| MRPL15    | 268859  | 464 | 31  | 748668  | 222144  | 0 | 1  | 1 | 0 | 50 | 48 | 20317988 | 8.31E-01 | 1 |
| SSTR4     | 199022  | 554 | -50 | 926312  | 324316  | 0 | 2  | 1 | 0 | 19 | 25 | 7971196  | 8.31E-01 | 1 |
| KIF7      | 804572  | 319 | 27  | 3338924 | 1044148 | 0 | 4  | 0 | 0 | 2  | 2  | 2957292  | 8.32E-01 | 1 |
| IQSEC2    | 886836  | NaN | 77  | 3780008 | 1189396 | 0 | 6  | 2 | 0 | 11 | 11 | 5843384  | 8.32E-01 | 1 |
| LZTR1     | 577297  | 192 | 58  | 2173736 | 607336  | 0 | 8  | 3 | 0 | 50 | 77 | 21004712 | 8.32E-01 | 1 |
| SCARA5    | 413257  | 154 | 32  | 1237100 | 386260  | 0 | 2  | 3 | 0 | 50 | 57 | 18399148 | 8.32E-01 | 1 |
| EIF4E1B   | 579630  | 359 | 40  | 635816  | 172660  | 0 | 1  | 1 | 0 | 15 | 19 | 6442532  | 8.32E-01 | 1 |

|         |         |      |     |         |         |   |    |   |   |    |     |          |          |   |
|---------|---------|------|-----|---------|---------|---|----|---|---|----|-----|----------|----------|---|
| CAPN9   | 438898  | 550  | 7   | 1830196 | 467072  | 0 | 5  | 0 | 0 | 10 | 14  | 5482044  | 8.32E-01 | 1 |
| CDHR3   | 337002  | 408  | 29  | 2273416 | 642224  | 0 | 3  | 2 | 0 | 31 | 38  | 15093332 | 8.32E-01 | 1 |
| ARRDC5  | 777835  | 173  | 42  | 862944  | 244572  | 0 | 2  | 2 | 0 | 49 | 74  | 22044944 | 8.32E-01 | 1 |
| NARFL   | 1207790 | 194  | 33  | 1223572 | 349592  | 0 | 1  | 1 | 0 | 50 | 77  | 22508812 | 8.32E-01 | 1 |
| PPEF2   | 482292  | 429  | 45  | 1967968 | 516200  | 0 | 4  | 3 | 0 | 45 | 53  | 19423360 | 8.32E-01 | 1 |
| MSR1    | 53956   | 947  | -48 | 1221080 | 314704  | 0 | 4  | 1 | 0 | 50 | 62  | 17031752 | 8.32E-01 | 1 |
| CDH6    | 133952  | 902  | -26 | 2014248 | 562836  | 0 | 11 | 2 | 0 | 50 | 104 | 21117920 | 8.32E-01 | 1 |
| MEIS3   | 797690  | 276  | 38  | 1093276 | 310076  | 0 | 2  | 2 | 0 | 50 | 64  | 22709952 | 8.32E-01 | 1 |
| UGGT1   | 449913  | 419  | 24  | 4108596 | 1047708 | 0 | 11 | 3 | 0 | 25 | 25  | 9939876  | 8.32E-01 | 1 |
| PRPF31  | 735613  | 439  | -53 | 1293704 | 363832  | 0 | 4  | 3 | 0 | 50 | 119 | 29395632 | 8.33E-01 | 1 |
| ULK1    | 374096  | 180  | 23  | 2655760 | 826988  | 0 | 7  | 4 | 0 | 8  | 18  | 5872576  | 8.33E-01 | 1 |
| GATA6   | 230941  | 437  | -1  | 1443224 | 491992  | 0 | 2  | 0 | 0 | 50 | 45  | 21833836 | 8.33E-01 | 1 |
| MINPP1  | 470910  | 190  | 25  | 1282668 | 336420  | 0 | 5  | 1 | 0 | 5  | 3   | 1165544  | 8.33E-01 | 1 |
| DQX1    | 1019591 | 315  | 50  | 1786408 | 561056  | 0 | 3  | 2 | 0 | 50 | 69  | 21835972 | 8.33E-01 | 1 |
| AQP3    | 1001877 | 166  | 4   | 729088  | 233180  | 0 | 1  | 0 | 0 | 50 | 43  | 17029972 | 8.33E-01 | 1 |
| LRRC16A | 247903  | 576  | 28  | 3590260 | 959420  | 0 | 10 | 1 | 0 | 24 | 19  | 8732324  | 8.33E-01 | 1 |
| TRIM73  | NaN     | NaN  | NaN | 638308  | 182984  | 0 | 1  | 1 | 0 | 50 | 117 | 39828568 | 8.33E-01 | 1 |
| PEF1    | 1093701 | 197  | 37  | 718052  | 212176  | 0 | 1  | 0 | 0 | 50 | 47  | 18470348 | 8.33E-01 | 1 |
| STXBP3  | 772267  | 191  | 9   | 1593812 | 385192  | 0 | 4  | 1 | 0 | 50 | 68  | 20925680 | 8.33E-01 | 1 |
| NOX1    | 352830  | NaN  | 29  | 1472060 | 389464  | 0 | 3  | 0 | 0 | 47 | 59  | 22369260 | 8.33E-01 | 1 |
| GZF1    | 188823  | 688  | -22 | 1815244 | 483092  | 0 | 4  | 2 | 0 | 37 | 66  | 17618440 | 8.33E-01 | 1 |
| HSD3B1  | 422140  | 672  | 7   | 942332  | 268780  | 0 | 3  | 3 | 0 | 9  | 7   | 2352448  | 8.33E-01 | 1 |
| TRDN    | 23697   | 1090 | -16 | 2077260 | 434676  | 0 | 5  | 0 | 0 | 18 | 29  | 7929188  | 8.33E-01 | 1 |
| CDON    | 611194  | 249  | 10  | 3208272 | 925956  | 0 | 9  | 4 | 0 | 40 | 59  | 20371744 | 8.33E-01 | 1 |
| CAPNS2  | NaN     | NaN  | NaN | 621932  | 178000  | 0 | 1  | 1 | 0 | 50 | 117 | 39823584 | 8.34E-01 | 1 |
| UBR5    | 504282  | 414  | 39  | 7232140 | 1988972 | 0 | 23 | 7 | 0 | 31 | 55  | 17655108 | 8.34E-01 | 1 |
| SYMPK   | 883734  | 203  | 39  | 3221800 | 974372  | 0 | 9  | 3 | 0 | 50 | 63  | 19718840 | 8.34E-01 | 1 |
| DISP2   | 872646  | 184  | 42  | 3374880 | 1149168 | 0 | 6  | 2 | 0 | 39 | 36  | 15292336 | 8.34E-01 | 1 |
| HAL     | 366272  | 436  | 8   | 1707732 | 485940  | 0 | 5  | 4 | 0 | 20 | 26  | 6505544  | 8.34E-01 | 1 |
| HELT    | 335039  | 582  | 29  | 805272  | 257388  | 0 | 1  | 0 | 0 | 50 | 58  | 22976596 | 8.34E-01 | 1 |
| CAGE1   | 761240  | 283  | 15  | 2319696 | 540408  | 0 | 5  | 0 | 0 | 13 | 15  | 6262752  | 8.34E-01 | 1 |
| HCFC1   | 2355024 | NaN  | 25  | 4939144 | 1691000 | 0 | 6  | 1 | 0 | 1  | 1   | 2253836  | 8.34E-01 | 1 |
| RAET1L  | 402308  | 382  | 51  | 629408  | 175864  | 0 | 1  | 1 | 0 | 50 | 64  | 22330812 | 8.34E-01 | 1 |



|         |         |      |     |         |         |   |    |   |   |    |    |          |          |   |
|---------|---------|------|-----|---------|---------|---|----|---|---|----|----|----------|----------|---|
| TASP1   | 121103  | 796  | -26 | 1101464 | 302956  | 0 | 3  | 2 | 0 | 50 | 81 | 21275272 | 8.34E-01 | 1 |
| MRPS17  | 760564  | 642  | 11  | 328588  | 99680   | 0 | 2  | 2 | 0 | 2  | 2  | 452476   | 8.34E-01 | 1 |
| MGEA5   | 817474  | 335  | 37  | 2386624 | 615524  | 0 | 9  | 0 | 0 | 0  | 0  | 615524   | 8.34E-01 | 1 |
| ZNF862  | 438832  | 686  | 26  | 2924184 | 854400  | 0 | 6  | 2 | 0 | 11 | 10 | 4417960  | 8.34E-01 | 1 |
| CENPQ   | 64168   | 1198 | -6  | 724816  | 171236  | 0 | 1  | 0 | 0 | 50 | 47 | 18347172 | 8.34E-01 | 1 |
| NFYB    | 1222031 | 156  | 17  | 563548  | 132788  | 0 | 1  | 0 | 0 | 50 | 57 | 17603844 | 8.34E-01 | 1 |
| MRPL19  | 138530  | 559  | 2   | 762196  | 200072  | 0 | 1  | 0 | 0 | 50 | 67 | 24679344 | 8.34E-01 | 1 |
| LONP1   | 935129  | 225  | 23  | 2419020 | 731580  | 0 | 9  | 4 | 0 | 50 | 48 | 15409460 | 8.34E-01 | 1 |
| ECHS1   | 386585  | 472  | 13  | 764332  | 200072  | 0 | 1  | 0 | 0 | 50 | 46 | 19712788 | 8.34E-01 | 1 |
| RAB24   | 942017  | 227  | 53  | 551088  | 136704  | 0 | 1  | 1 | 0 | 50 | 65 | 19830268 | 8.34E-01 | 1 |
| LFNG    | 783535  | 226  | 47  | 1197228 | 363120  | 0 | 2  | 1 | 0 | 50 | 52 | 20797164 | 8.35E-01 | 1 |
| ZNF697  | 421423  | 599  | 13  | 1362412 | 395516  | 0 | 3  | 0 | 0 | 39 | 52 | 17563260 | 8.35E-01 | 1 |
| ZNF131  | 506232  | 537  | 21  | 1538988 | 381276  | 0 | 4  | 2 | 0 | 50 | 66 | 21136788 | 8.35E-01 | 1 |
| IFNA21  | 137739  | 498  | 1   | 479176  | 131720  | 0 | 1  | 2 | 0 | 8  | 11 | 3212900  | 8.35E-01 | 1 |
| CFTR    | 116609  | 480  | -7  | 3825932 | 1030264 | 0 | 14 | 2 | 0 | 4  | 8  | 2961208  | 8.35E-01 | 1 |
| CDK11A  | NaN     | NaN  | NaN | 2097908 | 519760  | 0 | 8  | 4 | 0 | 26 | 44 | 12096880 | 8.35E-01 | 1 |
| ILF2    | 1656449 | 183  | 40  | 1023856 | 286580  | 0 | 2  | 0 | 0 | 27 | 29 | 10394844 | 8.35E-01 | 1 |
| SH2D4B  | 302345  | 686  | -11 | 965472  | 254184  | 0 | 1  | 1 | 0 | 50 | 56 | 21159572 | 8.35E-01 | 1 |
| COG1    | 221646  | 251  | -11 | 2479540 | 725528  | 0 | 6  | 2 | 0 | 27 | 27 | 11526568 | 8.35E-01 | 1 |
| BTRC    | 649315  | 421  | 27  | 1578504 | 422928  | 0 | 3  | 1 | 0 | 50 | 47 | 18228624 | 8.35E-01 | 1 |
| AGPAT4  | 74993   | 874  | -5  | 982560  | 265932  | 0 | 2  | 1 | 0 | 50 | 70 | 22423372 | 8.35E-01 | 1 |
| TTNBP2N | 559406  | 335  | 23  | 1596304 | 471344  | 0 | 2  | 2 | 0 | 50 | 40 | 21444728 | 8.35E-01 | 1 |
| IGHMBP2 | 575839  | 253  | 48  | 2483456 | 763264  | 0 | 5  | 1 | 0 | 3  | 2  | 1894276  | 8.35E-01 | 1 |
| FAM122B | 293030  | NaN  | 27  | 778928  | 195088  | 0 | 1  | 0 | 0 | 50 | 78 | 26755892 | 8.35E-01 | 1 |
| UST     | 169694  | 476  | 8   | 1053048 | 280884  | 0 | 2  | 1 | 0 | 50 | 67 | 20598872 | 8.35E-01 | 1 |
| PHC1    | 296906  | 416  | 12  | 2510156 | 769672  | 0 | 3  | 1 | 0 | 31 | 34 | 15035660 | 8.35E-01 | 1 |
| MLLT6   | 1117878 | 207  | 41  | 2713076 | 875404  | 0 | 5  | 0 | 0 | 1  | 0  | 989324   | 8.35E-01 | 1 |
| CLCNKB  | 886121  | 197  | 43  | 1873984 | 567464  | 0 | 5  | 4 | 0 | 35 | 41 | 14362820 | 8.35E-01 | 1 |
| CDH26   | 73597   | 856  | -36 | 2152376 | 610540  | 0 | 7  | 2 | 0 | 8  | 10 | 3553236  | 8.35E-01 | 1 |
| LYL1    | 1948449 | 221  | 41  | 672840  | 240300  | 0 | 1  | 0 | 0 | 50 | 60 | 21446864 | 8.36E-01 | 1 |
| WSB2    | 639801  | 584  | -3  | 1042724 | 291208  | 0 | 2  | 0 | 0 | 12 | 17 | 6241036  | 8.36E-01 | 1 |
| PDLIM1  | 302337  | 444  | 6   | 850484  | 232468  | 0 | 1  | 0 | 0 | 28 | 21 | 10474232 | 8.36E-01 | 1 |
| PTPN5   | 605685  | 562  | 26  | 1463160 | 410112  | 0 | 1  | 1 | 0 | 50 | 62 | 22631632 | 8.36E-01 | 1 |

|         |         |      |     |         |         |   |    |   |   |    |     |          |          |   |
|---------|---------|------|-----|---------|---------|---|----|---|---|----|-----|----------|----------|---|
| DCAF10  | 477149  | 524  | 35  | 1383772 | 438236  | 0 | 4  | 0 | 0 | 24 | 23  | 7950904  | 8.36E-01 | 1 |
| UPF3B   | 762240  | NaN  | 61  | 1300824 | 294768  | 0 | 3  | 1 | 0 | 34 | 38  | 12790368 | 8.36E-01 | 1 |
| INTS12  | 293906  | 417  | 3   | 1168036 | 342116  | 0 | 2  | 1 | 0 | 50 | 56  | 21183068 | 8.36E-01 | 1 |
| KAZALD1 | 469702  | 221  | 52  | 752584  | 241724  | 0 | 1  | 0 | 0 | 50 | 47  | 19691784 | 8.36E-01 | 1 |
| GPR65   | 115758  | 976  | -36 | 855824  | 227128  | 0 | 3  | 0 | 0 | 50 | 108 | 24423380 | 8.36E-01 | 1 |
| ACER1   | 943949  | 407  | 31  | 691352  | 181204  | 0 | 1  | 0 | 0 | 50 | 47  | 18083732 | 8.36E-01 | 1 |
| THAP6   | 461415  | 491  | 19  | 589536  | 142044  | 0 | 1  | 0 | 0 | 50 | 63  | 20447928 | 8.36E-01 | 1 |
| HOXC12  | 1257445 | 274  | 23  | 682808  | 226060  | 0 | 1  | 0 | 0 | 50 | 62  | 22406640 | 8.36E-01 | 1 |
| ITPR3   | 1401905 | 205  | 38  | 6916368 | 1888224 | 0 | 10 | 9 | 0 | 50 | 71  | 27027164 | 8.36E-01 | 1 |
| CDC34   | 1647685 | 255  | -8  | 606624  | 169812  | 0 | 1  | 1 | 0 | 50 | 56  | 18766896 | 8.36E-01 | 1 |
| GPR37   | 34802   | 462  | -24 | 1492352 | 479176  | 0 | 6  | 2 | 0 | 50 | 71  | 17173440 | 8.36E-01 | 1 |
| CNGA1   | 220829  | 474  | 40  | 1969036 | 502316  | 0 | 4  | 1 | 0 | 50 | 77  | 23317288 | 8.36E-01 | 1 |
| ACOT8   | 742720  | 180  | 48  | 829124  | 233536  | 0 | 3  | 0 | 0 | 2  | 3   | 781064   | 8.37E-01 | 1 |
| TBX21   | 1118277 | 217  | 27  | 1335000 | 403704  | 0 | 1  | 0 | 0 | 33 | 34  | 11473880 | 8.37E-01 | 1 |
| CLCN2   | 1447013 | 268  | 44  | 2283740 | 694912  | 0 | 6  | 1 | 0 | 4  | 10  | 2959072  | 8.37E-01 | 1 |
| CBX2    | 633863  | 209  | 31  | 1590964 | 505520  | 0 | 2  | 3 | 0 | 50 | 64  | 19219728 | 8.37E-01 | 1 |
| SLC19A1 | 422182  | 618  | 40  | 1423644 | 494484  | 0 | 3  | 3 | 0 | 50 | 61  | 20576800 | 8.37E-01 | 1 |
| GLG1    | 499497  | 209  | 36  | 3161280 | 811680  | 0 | 6  | 0 | 0 | 0  | 0   | 811680   | 8.37E-01 | 1 |
| MLKL    | 586358  | 173  | 30  | 1271276 | 316840  | 0 | 3  | 3 | 0 | 11 | 18  | 4635120  | 8.37E-01 | 1 |
| SHISA2  | 96652   | 584  | 12  | 726952  | 227840  | 0 | 1  | 0 | 0 | 50 | 61  | 23431564 | 8.37E-01 | 1 |
| ZFAND3  | 303392  | 630  | 32  | 595588  | 156284  | 0 | 1  | 1 | 0 | 50 | 56  | 16262436 | 8.37E-01 | 1 |
| MRPS6   | 785767  | 574  | 70  | 321468  | 90780   | 0 | 2  | 1 | 0 | 1  | 1   | 338556   | 8.37E-01 | 1 |
| VWA5A   | 177269  | 744  | -11 | 2040592 | 555716  | 0 | 5  | 2 | 0 | 15 | 20  | 7197964  | 8.37E-01 | 1 |
| NOV     | 261913  | 519  | -14 | 911716  | 252404  | 0 | 2  | 1 | 0 | 50 | 86  | 25453644 | 8.37E-01 | 1 |
| STRC    | 784339  | 198  | 44  | 4347828 | 1464228 | 0 | 6  | 0 | 0 | 1  | 0   | 1579572  | 8.37E-01 | 1 |
| TMEM222 | 884974  | 188  | 30  | 544680  | 148452  | 0 | 1  | 1 | 0 | 50 | 101 | 28643048 | 8.37E-01 | 1 |
| STARD10 | 529647  | 207  | 50  | 752228  | 204700  | 0 | 2  | 2 | 0 | 3  | 4   | 1508372  | 8.37E-01 | 1 |
| PPA2    | 217228  | 603  | 29  | 901392  | 221076  | 0 | 2  | 0 | 0 | 13 | 15  | 5206856  | 8.37E-01 | 1 |
| LRPPRC  | 455568  | 429  | 26  | 3684244 | 945536  | 0 | 7  | 2 | 0 | 6  | 5   | 2676764  | 8.37E-01 | 1 |
| SULT1E1 | 9735    | 1009 | 4   | 797084  | 178000  | 0 | 1  | 0 | 0 | 50 | 57  | 22716716 | 8.38E-01 | 1 |
| CD74    | 949599  | 212  | 40  | 795304  | 194732  | 0 | 1  | 0 | 0 | 50 | 73  | 24033560 | 8.38E-01 | 1 |
| SLC3A2  | 2342595 | 181  | 71  | 1668572 | 506944  | 0 | 2  | 1 | 0 | 50 | 77  | 24280268 | 8.38E-01 | 1 |
| SETD3   | 340080  | 429  | -11 | 1583488 | 421148  | 0 | 3  | 1 | 0 | 50 | 59  | 22500980 | 8.38E-01 | 1 |

|          |         |      |     |         |         |   |    |   |   |    |    |          |          |   |
|----------|---------|------|-----|---------|---------|---|----|---|---|----|----|----------|----------|---|
| TAOK2    | 2038342 | 238  | 60  | 3788552 | 1226776 | 0 | 10 | 2 | 0 | 1  | 3  | 1674980  | 8.38E-01 | 1 |
| MSI2     | 801767  | 507  | -7  | 961200  | 247776  | 0 | 3  | 1 | 0 | 50 | 59 | 15911064 | 8.38E-01 | 1 |
| SPON1    | 414198  | 644  | -10 | 2096484 | 555360  | 0 | 4  | 0 | 0 | 15 | 13 | 5082256  | 8.38E-01 | 1 |
| ZKSCAN1  | 1503181 | 254  | 41  | 1437528 | 390888  | 0 | 3  | 0 | 0 | 18 | 21 | 7410140  | 8.38E-01 | 1 |
| VARS     | 2509866 | 183  | 32  | 3196880 | 982204  | 0 | 5  | 1 | 0 | 5  | 4  | 3282676  | 8.38E-01 | 1 |
| PNPLA4   | 43100   | NaN  | -9  | 649700  | 189748  | 0 | 1  | 1 | 0 | 40 | 84 | 20456828 | 8.38E-01 | 1 |
| BTNL2    | 1582117 | 580  | 27  | 1154864 | 327520  | 0 | 2  | 2 | 0 | 21 | 47 | 10638704 | 8.38E-01 | 1 |
| NAT10    | 769733  | 358  | 33  | 2662524 | 744396  | 0 | 7  | 3 | 0 | 50 | 54 | 20584276 | 8.38E-01 | 1 |
| LGI1     | 488719  | 532  | 4   | 1444648 | 373088  | 0 | 3  | 1 | 0 | 50 | 65 | 23021096 | 8.38E-01 | 1 |
| KCNS2    | 440962  | 550  | 28  | 1187616 | 348168  | 0 | 6  | 4 | 0 | 9  | 13 | 3009268  | 8.38E-01 | 1 |
| MYOF     | 458453  | 380  | 16  | 5412268 | 1420796 | 0 | 13 | 5 | 0 | 14 | 14 | 4963708  | 8.38E-01 | 1 |
| SLC25A19 | 1723762 | 171  | 31  | 815240  | 238876  | 0 | 2  | 1 | 0 | 50 | 81 | 19557572 | 8.38E-01 | 1 |
| ZNF835   | 174439  | 849  | -68 | 1395876 | 400500  | 0 | 4  | 0 | 0 | 10 | 9  | 3531876  | 8.38E-01 | 1 |
| CXXC4    | 18498   | 982  | 18  | 495196  | 148808  | 0 | 1  | 2 | 0 | 20 | 32 | 7273080  | 8.38E-01 | 1 |
| OR52B4   | 363779  | 797  | -8  | 783912  | 229620  | 0 | 1  | 1 | 0 | 31 | 35 | 13623052 | 8.38E-01 | 1 |
| SLC35A1  | 229577  | 534  | 27  | 865792  | 249200  | 0 | 1  | 0 | 0 | 17 | 10 | 5337152  | 8.38E-01 | 1 |
| MAP3K13  | 953031  | 397  | 36  | 2480608 | 673196  | 0 | 10 | 2 | 0 | 6  | 6  | 1986124  | 8.38E-01 | 1 |
| RRP1     | 835438  | 194  | 66  | 1204348 | 329300  | 0 | 2  | 2 | 0 | 7  | 4  | 2342124  | 8.38E-01 | 1 |
| CEP152   | 418237  | 340  | 6   | 4366696 | 1044860 | 0 | 9  | 3 | 0 | 50 | 53 | 22315148 | 8.39E-01 | 1 |
| CCT8L2   | 107592  | 852  | -83 | 1339984 | 447848  | 0 | 5  | 3 | 0 | 50 | 76 | 18817448 | 8.39E-01 | 1 |
| DPP10    | 7721    | 1178 | -22 | 2279112 | 563904  | 0 | 12 | 5 | 0 | 3  | 7  | 1505168  | 8.39E-01 | 1 |
| ONECUT2  | 300344  | 480  | 15  | 1231760 | 392668  | 0 | 2  | 1 | 0 | 50 | 46 | 18182344 | 8.39E-01 | 1 |
| ITFG2    | 495532  | 443  | 28  | 1155220 | 327164  | 0 | 2  | 2 | 0 | 7  | 16 | 3959432  | 8.39E-01 | 1 |
| ZNF34    | 1647917 | 356  | 18  | 1447496 | 371308  | 0 | 4  | 1 | 0 | 37 | 49 | 15171296 | 8.39E-01 | 1 |
| ACAD8    | 270350  | 623  | 21  | 1077256 | 300464  | 0 | 3  | 0 | 0 | 3  | 2  | 1141336  | 8.39E-01 | 1 |
| ALDH7A1  | 235232  | 191  | 19  | 1413320 | 389464  | 0 | 2  | 1 | 0 | 50 | 41 | 19182704 | 8.39E-01 | 1 |
| NIPA1    | 352778  | 529  | -8  | 810612  | 265932  | 0 | 1  | 0 | 0 | 50 | 53 | 22668300 | 8.39E-01 | 1 |
| RPH3A    | 651570  | 527  | 28  | 1829128 | 483092  | 0 | 8  | 4 | 0 | 4  | 12 | 2618380  | 8.39E-01 | 1 |
| FGF11    | 1906324 | 206  | 33  | 566396  | 174796  | 0 | 1  | 0 | 0 | 50 | 87 | 23542992 | 8.39E-01 | 1 |
| CPSF4    | 1327454 | 288  | 60  | 720188  | 174796  | 0 | 2  | 2 | 0 | 12 | 13 | 3472424  | 8.39E-01 | 1 |
| HPN      | 738570  | 419  | -34 | 1068712 | 321824  | 0 | 3  | 1 | 0 | 31 | 49 | 12641916 | 8.39E-01 | 1 |
| LCP2     | 79392   | 629  | 34  | 1430408 | 365968  | 0 | 2  | 0 | 0 | 14 | 13 | 6571048  | 8.39E-01 | 1 |
| ZNF496   | 352232  | 742  | -15 | 1491996 | 421860  | 0 | 4  | 2 | 0 | 50 | 50 | 15613092 | 8.39E-01 | 1 |

|         |         |      |     |         |         |   |    |   |   |    |     |          |          |   |
|---------|---------|------|-----|---------|---------|---|----|---|---|----|-----|----------|----------|---|
| TMEM72  | 75634   | 905  | 25  | 689928  | 213600  | 0 | 1  | 2 | 0 | 16 | 17  | 6943780  | 8.39E-01 | 1 |
| DDX54   | 468053  | 252  | 35  | 2232832 | 679604  | 0 | 6  | 1 | 0 | 41 | 44  | 15877600 | 8.39E-01 | 1 |
| TSSK4   | 974559  | 220  | 41  | 860808  | 240300  | 0 | 1  | 1 | 0 | 50 | 62  | 24565780 | 8.39E-01 | 1 |
| CHERP   | 815495  | 258  | 44  | 2360636 | 652192  | 0 | 7  | 2 | 0 | 50 | 65  | 20976232 | 8.39E-01 | 1 |
| DSE     | 261273  | 541  | 30  | 2428988 | 665008  | 0 | 4  | 0 | 0 | 10 | 12  | 5622664  | 8.39E-01 | 1 |
| RAB4B   | 1157241 | 186  | 29  | 556428  | 159132  | 0 | 1  | 2 | 0 | 4  | 5   | 1782136  | 8.39E-01 | 1 |
| CEP350  | 446036  | 211  | 16  | 8035988 | 2112148 | 0 | 24 | 4 | 0 | 5  | 6   | 2825572  | 8.39E-01 | 1 |
| RBMX    | 275533  | NaN  | 28  | 1116772 | 234248  | 0 | 2  | 0 | 0 | 50 | 59  | 21499908 | 8.39E-01 | 1 |
| PSG3    | 386041  | 417  | -19 | 1092920 | 307228  | 0 | 8  | 2 | 0 | 1  | 2   | 616592   | 8.40E-01 | 1 |
| COMP    | 1351321 | 189  | 26  | 1980072 | 527592  | 0 | 5  | 3 | 0 | 50 | 68  | 21923548 | 8.40E-01 | 1 |
| KCNMB3  | 412428  | 641  | 14  | 883236  | 234960  | 0 | 1  | 1 | 0 | 50 | 59  | 23508816 | 8.40E-01 | 1 |
| ARHGAP4 | 2328608 | NaN  | 27  | 2496628 | 761840  | 0 | 3  | 0 | 0 | 7  | 3   | 3174096  | 8.40E-01 | 1 |
| HUS1    | 147364  | 445  | 21  | 748668  | 181560  | 0 | 1  | 2 | 0 | 7  | 13  | 2683172  | 8.40E-01 | 1 |
| LIMK2   | 667559  | 221  | 43  | 1995024 | 553224  | 0 | 4  | 2 | 0 | 50 | 51  | 21792540 | 8.40E-01 | 1 |
| CCDC70  | 353099  | 349  | 69  | 612676  | 141332  | 0 | 1  | 0 | 0 | 50 | 63  | 20681108 | 8.40E-01 | 1 |
| SLC45A4 | 277190  | 239  | 57  | 1977224 | 612676  | 0 | 3  | 3 | 0 | 50 | 63  | 20197304 | 8.40E-01 | 1 |
| PPIL1   | 836025  | 244  | 43  | 432540  | 115344  | 0 | 1  | 1 | 0 | 20 | 33  | 7678920  | 8.40E-01 | 1 |
| AKTIP   | 247554  | 403  | 8   | 771096  | 206124  | 0 | 1  | 1 | 0 | 50 | 47  | 20614180 | 8.40E-01 | 1 |
| CHAT    | NaN     | NaN  | NaN | 1943404 | 567464  | 0 | 3  | 3 | 0 | 50 | 119 | 40213048 | 8.40E-01 | 1 |
| TNS4    | 1185295 | 203  | 19  | 1796376 | 548952  | 0 | 4  | 1 | 0 | 9  | 9   | 3119272  | 8.40E-01 | 1 |
| BMP8A   | 1026100 | 352  | 33  | 1000004 | 316840  | 0 | 2  | 1 | 0 | 50 | 65  | 20172028 | 8.40E-01 | 1 |
| PTPN11  | 704590  | 167  | 43  | 1573876 | 393380  | 0 | 3  | 0 | 0 | 50 | 61  | 22148540 | 8.40E-01 | 1 |
| ACRC    | 848605  | NaN  | 39  | 1830908 | 437524  | 0 | 3  | 0 | 0 | 20 | 19  | 6479556  | 8.40E-01 | 1 |
| LY9     | 1188881 | 618  | 29  | 1769320 | 511928  | 0 | 6  | 4 | 0 | 21 | 35  | 7939156  | 8.40E-01 | 1 |
| PPHLN1  | 174675  | 545  | 14  | 1377364 | 365612  | 0 | 4  | 0 | 0 | 12 | 19  | 6802092  | 8.40E-01 | 1 |
| IL1RL1  | 240161  | 588  | 9   | 1462092 | 377004  | 0 | 2  | 0 | 0 | 44 | 43  | 20577868 | 8.41E-01 | 1 |
| NLRP1   | 1016229 | 605  | 10  | 3771820 | 1097192 | 0 | 9  | 4 | 0 | 32 | 43  | 13687488 | 8.41E-01 | 1 |
| SPDEF   | 890476  | 207  | 34  | 859740  | 238164  | 0 | 1  | 0 | 0 | 50 | 68  | 21500264 | 8.41E-01 | 1 |
| FBXO31  | 576709  | 311  | 18  | 1363480 | 402992  | 0 | 2  | 0 | 0 | 25 | 26  | 11217204 | 8.41E-01 | 1 |
| OR10G7  | 158396  | 830  | -10 | 751872  | 247776  | 0 | 3  | 2 | 0 | 7  | 15  | 3266300  | 8.41E-01 | 1 |
| OR4C12  | 11630   | 1171 | -38 | 770028  | 227484  | 0 | 2  | 0 | 0 | 50 | 94  | 21047432 | 8.41E-01 | 1 |
| MPI     | 764533  | 195  | 46  | 1080816 | 309720  | 0 | 4  | 4 | 0 | 11 | 14  | 2513716  | 8.41E-01 | 1 |
| NFU1    | 488690  | 285  | 23  | 676400  | 174796  | 0 | 1  | 0 | 0 | 43 | 37  | 13861216 | 8.41E-01 | 1 |

|          |         |     |     |          |         |   |    |   |   |    |     |          |          |   |
|----------|---------|-----|-----|----------|---------|---|----|---|---|----|-----|----------|----------|---|
| KIR2DS4  | 987531  | 620 | -23 | 770028   | 215736  | 0 | 1  | 0 | 0 | 50 | 135 | 24266740 | 8.41E-01 | 1 |
| CXCL16   | 1272092 | 222 | 28  | 685300   | 216092  | 0 | 1  | 1 | 0 | 50 | 74  | 23892584 | 8.41E-01 | 1 |
| GPS1     | 3850694 | 197 | 34  | 1402284  | 393024  | 0 | 6  | 0 | 0 | 0  | 0   | 393024   | 8.41E-01 | 1 |
| MRPS27   | 414939  | 342 | 29  | 1093988  | 280528  | 0 | 1  | 0 | 0 | 50 | 44  | 21968760 | 8.41E-01 | 1 |
| STX17    | 244386  | 519 | 14  | 790320   | 210396  | 0 | 1  | 3 | 0 | 15 | 30  | 6220744  | 8.41E-01 | 1 |
| INRNPUL  | 1186597 | 214 | 24  | 2197232  | 608404  | 0 | 8  | 3 | 0 | 13 | 22  | 5265952  | 8.41E-01 | 1 |
| FAM109A  | 473383  | 479 | 42  | 626204   | 224992  | 0 | 1  | 0 | 0 | 50 | 65  | 22007208 | 8.41E-01 | 1 |
| MAP4K4   | 325378  | 593 | 24  | 3463880  | 928804  | 0 | 6  | 1 | 0 | 17 | 27  | 11950920 | 8.41E-01 | 1 |
| CRYZL1   | 909314  | 375 | 58  | 935924   | 236740  | 0 | 2  | 1 | 0 | 50 | 61  | 18140692 | 8.41E-01 | 1 |
| KRT77    | 1441383 | 464 | 29  | 1468500  | 422928  | 0 | 5  | 2 | 0 | 50 | 83  | 20991896 | 8.41E-01 | 1 |
| SPOPL    | 85990   | 638 | 15  | 1045928  | 255964  | 0 | 2  | 2 | 0 | 32 | 36  | 12165588 | 8.42E-01 | 1 |
| TTC26    | 562181  | 345 | 38  | 1503744  | 347100  | 0 | 3  | 2 | 0 | 50 | 59  | 20736644 | 8.42E-01 | 1 |
| CPXM1    | 796251  | 438 | 41  | 1862592  | 550020  | 0 | 4  | 2 | 0 | 50 | 52  | 19055612 | 8.42E-01 | 1 |
| ATP10B   | 170108  | 904 | 11  | 3742628  | 1035604 | 0 | 5  | 1 | 0 | 11 | 5   | 5046656  | 8.42E-01 | 1 |
| EXOC3L2  | 1356264 | 243 | 38  | 1007836  | 344252  | 0 | 2  | 0 | 0 | 31 | 51  | 16516976 | 8.42E-01 | 1 |
| EEA1     | 296393  | 427 | 17  | 3756512  | 887152  | 0 | 10 | 1 | 0 | 15 | 16  | 7552896  | 8.42E-01 | 1 |
| GPR148   | 626077  | 372 | 11  | 830904   | 286224  | 0 | 1  | 0 | 0 | 50 | 57  | 22417676 | 8.42E-01 | 1 |
| ADAMTSL  | 313133  | 527 | -18 | 4465664  | 1304740 | 0 | 15 | 2 | 0 | 1  | 3   | 1694204  | 8.42E-01 | 1 |
| TTC19    | 954548  | 370 | -32 | 1289788  | 359204  | 0 | 3  | 1 | 0 | 12 | 18  | 4747260  | 8.42E-01 | 1 |
| GGT1     | 451217  | 194 | 36  | 1436816  | 443932  | 0 | 4  | 4 | 0 | 12 | 26  | 6095432  | 8.43E-01 | 1 |
| APOB     | 222162  | 698 | -11 | 11539740 | 3202932 | 0 | 31 | 9 | 0 | 21 | 27  | 11621976 | 8.43E-01 | 1 |
| EXO1     | 173100  | 325 | -16 | 2181212  | 588112  | 0 | 5  | 3 | 0 | 11 | 14  | 4788556  | 8.43E-01 | 1 |
| MEX3A    | 2005405 | 213 | 39  | 1242796  | 430760  | 0 | 4  | 2 | 0 | 30 | 49  | 13721664 | 8.43E-01 | 1 |
| KIAA1549 | 482191  | 289 | 18  | 4787132  | 1547176 | 0 | 8  | 2 | 0 | 5  | 5   | 2819876  | 8.43E-01 | 1 |
| SLC5A6   | 1238919 | 230 | 39  | 1590964  | 506588  | 0 | 4  | 0 | 0 | 13 | 18  | 6024232  | 8.43E-01 | 1 |
| SNX30    | 573618  | 453 | 19  | 1125316  | 312212  | 0 | 3  | 3 | 0 | 36 | 49  | 13306924 | 8.43E-01 | 1 |
| EIF3E    | 187290  | 965 | 6   | 1196872  | 285512  | 0 | 4  | 3 | 0 | 7  | 8   | 2473488  | 8.43E-01 | 1 |
| ZNF391   | 143920  | 645 | 19  | 925244   | 230332  | 0 | 1  | 0 | 0 | 50 | 54  | 19682172 | 8.43E-01 | 1 |
| ASB13    | 761737  | 299 | 21  | 707728   | 209684  | 0 | 1  | 0 | 0 | 50 | 72  | 24124696 | 8.43E-01 | 1 |
| GALNT1   | 486812  | 562 | 61  | 1466720  | 372376  | 0 | 4  | 0 | 0 | 7  | 5   | 2431124  | 8.43E-01 | 1 |
| CTAG2    | 2090264 | NaN | 31  | 613744   | 217160  | 0 | 1  | 0 | 0 | 15 | 20  | 6233916  | 8.43E-01 | 1 |
| CYP2A13  | 1004808 | 354 | 10  | 1268428  | 353864  | 0 | 4  | 2 | 0 | 50 | 71  | 13386668 | 8.43E-01 | 1 |
| PEMT     | 958193  | 236 | 12  | 603064   | 184052  | 0 | 1  | 0 | 0 | 50 | 71  | 22026432 | 8.43E-01 | 1 |

|         |         |     |     |         |         |   |    |   |   |    |     |          |          |   |
|---------|---------|-----|-----|---------|---------|---|----|---|---|----|-----|----------|----------|---|
| NLRX1   | 1258103 | 195 | 57  | 2500188 | 840516  | 0 | 6  | 4 | 0 | 21 | 28  | 9010004  | 8.43E-01 | 1 |
| ALOX12B | 1528802 | 272 | 26  | 1794240 | 514776  | 0 | 2  | 0 | 0 | 12 | 8   | 5211484  | 8.43E-01 | 1 |
| GRIP1   | 228672  | 944 | -6  | 2762560 | 786404  | 0 | 10 | 5 | 0 | 6  | 10  | 3022440  | 8.43E-01 | 1 |
| CRYBA1  | 1533931 | 159 | 32  | 584196  | 131364  | 0 | 1  | 1 | 0 | 50 | 69  | 21586416 | 8.44E-01 | 1 |
| CYP1A2  | 746043  | 199 | 41  | 1294416 | 387684  | 0 | 3  | 2 | 0 | 45 | 57  | 17713136 | 8.44E-01 | 1 |
| ANXA2   | 431518  | 299 | 14  | 962624  | 242080  | 0 | 1  | 1 | 0 | 14 | 13  | 5067304  | 8.44E-01 | 1 |
| BBS5    | 370890  | 418 | 22  | 917056  | 227840  | 0 | 1  | 0 | 0 | 50 | 53  | 25210496 | 8.44E-01 | 1 |
| COMTD1  | 208687  | 275 | 38  | 651124  | 221432  | 0 | 1  | 1 | 0 | 50 | 61  | 19380284 | 8.44E-01 | 1 |
| LYPD3   | 368705  | 182 | -29 | 852620  | 276256  | 0 | 2  | 1 | 0 | 50 | 84  | 21649072 | 8.44E-01 | 1 |
| MC1R    | 1207036 | 221 | 45  | 756500  | 262372  | 0 | 2  | 0 | 0 | 8  | 21  | 5465312  | 8.44E-01 | 1 |
| AMPD3   | 777397  | 378 | 27  | 2028488 | 544324  | 0 | 4  | 2 | 0 | 50 | 63  | 26181308 | 8.44E-01 | 1 |
| CLEC11A | 652250  | 593 | 27  | 798508  | 252404  | 0 | 1  | 1 | 0 | 50 | 64  | 22467160 | 8.44E-01 | 1 |
| WFDC13  | 777303  | 359 | 16  | 262372  | 51620   | 0 | 2  | 1 | 0 | 2  | 1   | 197224   | 8.44E-01 | 1 |
| ZNF71   | 174439  | 849 | -68 | 1231760 | 342472  | 0 | 1  | 2 | 0 | 50 | 78  | 23279908 | 8.44E-01 | 1 |
| CD300A  | 491117  | 504 | 7   | 762196  | 224636  | 0 | 1  | 0 | 0 | 50 | 50  | 18209400 | 8.44E-01 | 1 |
| APEX1   | 464497  | 395 | 17  | 805272  | 233892  | 0 | 1  | 0 | 0 | 50 | 58  | 21385632 | 8.44E-01 | 1 |
| P2RY6   | 578209  | 176 | 56  | 784624  | 273764  | 0 | 2  | 0 | 0 | 27 | 43  | 11447892 | 8.45E-01 | 1 |
| CTU1    | NaN     | NaN | NaN | 810968  | 315772  | 0 | 1  | 0 | 0 | 50 | 116 | 39961356 | 8.45E-01 | 1 |
| CASP6   | 211934  | 473 | 25  | 773588  | 196156  | 0 | 1  | 0 | 0 | 50 | 40  | 16217224 | 8.45E-01 | 1 |
| PRPF38A | 815523  | 448 | 26  | 833040  | 208260  | 0 | 1  | 1 | 0 | 50 | 62  | 23467164 | 8.45E-01 | 1 |
| TMCO3   | 768219  | 318 | 50  | 1716276 | 507300  | 0 | 7  | 0 | 0 | 2  | 2   | 956216   | 8.45E-01 | 1 |
| ZNF746  | 588536  | 467 | 17  | 1595948 | 499468  | 0 | 4  | 2 | 0 | 50 | 68  | 19904316 | 8.45E-01 | 1 |
| PRPF6   | 1152034 | 208 | 48  | 2431836 | 671772  | 0 | 8  | 2 | 0 | 50 | 78  | 24047088 | 8.45E-01 | 1 |
| ABCC8   | 454503  | 598 | 14  | 4039176 | 1191888 | 0 | 10 | 5 | 0 | 50 | 72  | 20591396 | 8.45E-01 | 1 |
| LBR     | 660503  | 319 | 0   | 1597372 | 431828  | 0 | 5  | 0 | 0 | 5  | 6   | 2511936  | 8.45E-01 | 1 |
| ESPNL   | 428658  | 356 | 29  | 2426140 | 831260  | 0 | 2  | 0 | 0 | 7  | 2   | 3167688  | 8.45E-01 | 1 |
| ANKRD1  | 103854  | 510 | 4   | 839092  | 220364  | 0 | 1  | 0 | 0 | 25 | 21  | 8382376  | 8.45E-01 | 1 |
| ILK     | 424523  | 491 | 17  | 1194024 | 312924  | 0 | 2  | 0 | 0 | 35 | 41  | 15296964 | 8.45E-01 | 1 |
| COL4A1  | 429137  | 434 | 12  | 4221448 | 1347104 | 0 | 12 | 3 | 0 | 7  | 19  | 6535092  | 8.45E-01 | 1 |
| NRL     | 992350  | 355 | 19  | 567464  | 203632  | 0 | 1  | 1 | 0 | 19 | 27  | 8529760  | 8.45E-01 | 1 |
| EBF2    | 277181  | 616 | -1  | 1500184 | 411536  | 0 | 2  | 4 | 0 | 11 | 13  | 4340352  | 8.45E-01 | 1 |
| ZNF749  | 451095  | 869 | -24 | 2013536 | 490924  | 0 | 4  | 1 | 0 | 32 | 34  | 10625888 | 8.45E-01 | 1 |
| PYGB    | 607993  | 348 | -8  | 2186552 | 598792  | 0 | 8  | 6 | 0 | 9  | 16  | 3367404  | 8.45E-01 | 1 |

|           |         |     |     |         |         |   |    |    |   |    |     |          |          |   |
|-----------|---------|-----|-----|---------|---------|---|----|----|---|----|-----|----------|----------|---|
| USP21     | 728669  | 234 | 37  | 1407624 | 457104  | 0 | 5  | 2  | 0 | 17 | 26  | 6686748  | 8.45E-01 | 1 |
| ALKBH3    | 437017  | 676 | 6   | 761128  | 196868  | 0 | 1  | 0  | 0 | 50 | 52  | 16264928 | 8.46E-01 | 1 |
| LRRTM2    | 1371519 | 442 | 31  | 1294772 | 365968  | 0 | 4  | 0  | 0 | 26 | 40  | 11585308 | 8.46E-01 | 1 |
| NANOS2    | 866240  | 261 | 42  | 340692  | 106800  | 0 | 1  | 1  | 0 | 4  | 6   | 1282312  | 8.46E-01 | 1 |
| ODF3L2    | 1370962 | 423 | -24 | 697760  | 244216  | 0 | 1  | 0  | 0 | 47 | 54  | 17671484 | 8.46E-01 | 1 |
| RTAP10-1  | 874480  | 461 | 25  | 642936  | 194376  | 0 | 1  | 0  | 0 | 50 | 76  | 22638396 | 8.46E-01 | 1 |
| MAGI1     | 74202   | 843 | -10 | 3936648 | 1092564 | 0 | 13 | 3  | 0 | 32 | 46  | 15605616 | 8.46E-01 | 1 |
| KLF10     | 528975  | 178 | 42  | 1207552 | 351728  | 0 | 3  | 0  | 0 | 32 | 35  | 10556468 | 8.46E-01 | 1 |
| TPD52L1   | 124606  | 243 | -26 | 550020  | 132432  | 0 | 1  | 0  | 0 | 50 | 67  | 19055256 | 8.46E-01 | 1 |
| SRCAP     | 1632278 | 158 | 61  | 7786076 | 2698480 | 0 | 33 | 7  | 0 | 0  | 7   | 2698480  | 8.46E-01 | 1 |
| PCDHGB6   | 662513  | 568 | 2   | 2320408 | 721256  | 0 | 8  | 0  | 0 | 0  | 0   | 721256   | 8.46E-01 | 1 |
| IDI1      | 338115  | 407 | 30  | 739056  | 191172  | 0 | 1  | 1  | 0 | 27 | 30  | 12219700 | 8.46E-01 | 1 |
| CSF1R     | 1127889 | 228 | 50  | 2504460 | 698472  | 0 | 9  | 1  | 0 | 11 | 14  | 4436116  | 8.46E-01 | 1 |
| JUND      | 1178047 | 210 | 43  | 819868  | 295124  | 0 | 2  | 1  | 0 | 50 | 86  | 22294856 | 8.46E-01 | 1 |
| ERN2      | 517081  | 598 | 33  | 2443940 | 769672  | 0 | 8  | 6  | 0 | 50 | 61  | 19252836 | 8.46E-01 | 1 |
| ZNF688    | 2214934 | 142 | 54  | 799932  | 262728  | 0 | 1  | 2  | 0 | 50 | 72  | 21947756 | 8.46E-01 | 1 |
| TOP3B     | 471565  | 474 | 58  | 2228916 | 610896  | 0 | 6  | 2  | 0 | 9  | 11  | 3506600  | 8.46E-01 | 1 |
| CD300LB   | 698491  | 504 | 10  | 615168  | 165540  | 0 | 1  | 0  | 0 | 50 | 63  | 19807128 | 8.46E-01 | 1 |
| KIF5B     | 360559  | 166 | 29  | 2575660 | 619796  | 0 | 6  | 2  | 0 | 3  | 3   | 1731584  | 8.46E-01 | 1 |
| VPRBP     | 549963  | 415 | 40  | 3729812 | 1030264 | 0 | 8  | 1  | 0 | 10 | 25  | 10556112 | 8.46E-01 | 1 |
| MANEAL    | 445096  | 375 | 33  | 1152372 | 330012  | 0 | 2  | 1  | 0 | 50 | 50  | 19791820 | 8.46E-01 | 1 |
| GJC3      | 1584669 | 391 | 36  | 686724  | 214668  | 0 | 1  | 0  | 0 | 50 | 53  | 18917840 | 8.47E-01 | 1 |
| THBS2     | 172423  | 720 | -32 | 3056972 | 791032  | 0 | 10 | 3  | 0 | 50 | 100 | 24861616 | 8.47E-01 | 1 |
| METTL13   | 419860  | 718 | -5  | 1766116 | 506588  | 0 | 7  | 1  | 0 | 13 | 17  | 4328960  | 8.47E-01 | 1 |
| CD38      | 174323  | 327 | 55  | 792812  | 201496  | 0 | 1  | 1  | 0 | 50 | 44  | 18052048 | 8.47E-01 | 1 |
| PCNT      | 991065  | 606 | 52  | 8511960 | 2376300 | 0 | 27 | 10 | 0 | 16 | 31  | 10775052 | 8.47E-01 | 1 |
| PBX1      | 61567   | 624 | -24 | 1113212 | 301888  | 0 | 3  | 0  | 0 | 16 | 23  | 6970124  | 8.47E-01 | 1 |
| VASH1     | 308800  | 471 | 39  | 923820  | 274476  | 0 | 2  | 1  | 0 | 50 | 58  | 16606688 | 8.47E-01 | 1 |
| VAMP5     | 1158965 | 170 | 43  | 296904  | 88644   | 0 | 1  | 1  | 0 | 7  | 8   | 1535784  | 8.47E-01 | 1 |
| DAAM1     | 156241  | 405 | 32  | 2846932 | 716984  | 0 | 9  | 3  | 0 | 2  | 3   | 1524748  | 8.47E-01 | 1 |
| ECHDC2    | 626387  | 311 | 30  | 660736  | 215024  | 0 | 1  | 2  | 0 | 11 | 12  | 4605572  | 8.47E-01 | 1 |
| BYSL      | 437075  | 225 | 41  | 1093632 | 335352  | 0 | 1  | 0  | 0 | 50 | 36  | 18443292 | 8.47E-01 | 1 |
| C14orf166 | 176784  | 471 | 22  | 654684  | 160200  | 0 | 1  | 0  | 0 | 50 | 55  | 19163124 | 8.48E-01 | 1 |

|          |         |      |     |         |         |   |    |   |   |    |     |          |          |   |
|----------|---------|------|-----|---------|---------|---|----|---|---|----|-----|----------|----------|---|
| ALG11    | 385945  | 461  | 41  | 1248136 | 346388  | 0 | 3  | 0 | 0 | 50 | 79  | 22488876 | 8.48E-01 | 1 |
| TEKT3    | 266888  | 359  | -53 | 1256680 | 346388  | 0 | 3  | 1 | 0 | 36 | 61  | 14178412 | 8.48E-01 | 1 |
| OAS3     | 613755  | 433  | 38  | 2740488 | 811680  | 0 | 7  | 0 | 0 | 0  | 0   | 811680   | 8.48E-01 | 1 |
| MRC2     | 200276  | 280  | -18 | 3835544 | 1030264 | 0 | 8  | 3 | 0 | 32 | 36  | 14985108 | 8.48E-01 | 1 |
| CORO2A   | 494263  | 272  | 50  | 1353512 | 376648  | 0 | 2  | 2 | 0 | 50 | 41  | 18058100 | 8.48E-01 | 1 |
| C18orf21 | 399000  | 585  | 15  | 573160  | 152012  | 0 | 1  | 0 | 0 | 50 | 73  | 22047436 | 8.48E-01 | 1 |
| WDR64    | 172691  | 227  | -16 | 2857968 | 719832  | 0 | 7  | 2 | 0 | 11 | 11  | 4439320  | 8.48E-01 | 1 |
| CNOT8    | 523671  | 378  | 41  | 774300  | 190104  | 0 | 1  | 1 | 0 | 37 | 41  | 12356760 | 8.48E-01 | 1 |
| LIME1    | 1126597 | 202  | 36  | 716984  | 252760  | 0 | 1  | 0 | 0 | 50 | 50  | 18382060 | 8.48E-01 | 1 |
| ATP5H    | 1111289 | 171  | 31  | 439304  | 103240  | 0 | 1  | 0 | 0 | 50 | 75  | 17336132 | 8.48E-01 | 1 |
| PTCD3    | 971062  | 420  | 46  | 1862236 | 451052  | 0 | 5  | 1 | 0 | 50 | 79  | 25822816 | 8.48E-01 | 1 |
| PWP1     | 122461  | 805  | 19  | 1336068 | 334284  | 0 | 2  | 0 | 0 | 24 | 25  | 11216848 | 8.48E-01 | 1 |
| TNC      | 194891  | 374  | 0   | 5569264 | 1597016 | 0 | 16 | 6 | 0 | 7  | 18  | 7056632  | 8.48E-01 | 1 |
| PLCB2    | 851107  | 167  | 36  | 3108592 | 823784  | 0 | 5  | 3 | 0 | 50 | 48  | 19638028 | 8.48E-01 | 1 |
| WASF3    | 149391  | 643  | 10  | 1273412 | 372376  | 0 | 3  | 2 | 0 | 50 | 69  | 21943128 | 8.48E-01 | 1 |
| CCR3     | 212198  | 634  | 46  | 936280  | 280172  | 0 | 2  | 1 | 0 | 50 | 50  | 14767948 | 8.48E-01 | 1 |
| IPMK     | 153476  | 357  | -28 | 1075120 | 282308  | 0 | 3  | 0 | 0 | 50 | 74  | 20179148 | 8.48E-01 | 1 |
| SEC62    | 398638  | 553  | 20  | 1066220 | 247420  | 0 | 2  | 2 | 0 | 9  | 34  | 8128904  | 8.48E-01 | 1 |
| RGN      | 830380  | NaN  | 52  | 778216  | 208616  | 0 | 1  | 0 | 0 | 50 | 59  | 18783628 | 8.48E-01 | 1 |
| CDC25B   | 860065  | 241  | 43  | 1501252 | 424352  | 0 | 3  | 2 | 0 | 16 | 30  | 7457844  | 8.49E-01 | 1 |
| AXIN1    | 1444992 | 205  | 40  | 2168040 | 639732  | 0 | 4  | 0 | 0 | 8  | 21  | 7077636  | 8.49E-01 | 1 |
| ZNF736   | NaN     | NaN  | NaN | 1129232 | 254896  | 0 | 2  | 0 | 0 | 50 | 116 | 39900480 | 8.49E-01 | 1 |
| SMARCA5  | 183412  | 821  | 9   | 2782496 | 689572  | 0 | 3  | 0 | 0 | 6  | 2   | 2846220  | 8.49E-01 | 1 |
| LRFN1    | 1793696 | 252  | 31  | 1808124 | 669636  | 0 | 5  | 2 | 0 | 22 | 30  | 9916736  | 8.49E-01 | 1 |
| RNF8     | 485024  | 426  | 37  | 1343188 | 344252  | 0 | 3  | 1 | 0 | 50 | 66  | 22029280 | 8.49E-01 | 1 |
| KEL      | 294033  | 676  | 2   | 1894276 | 531152  | 0 | 6  | 1 | 0 | 49 | 57  | 17327232 | 8.49E-01 | 1 |
| MTTP     | 318764  | 787  | 11  | 2309728 | 633680  | 0 | 11 | 5 | 0 | 3  | 7   | 1624428  | 8.49E-01 | 1 |
| ZNF77    | 1119793 | 197  | 35  | 1405132 | 357068  | 0 | 1  | 2 | 0 | 20 | 24  | 8194408  | 8.49E-01 | 1 |
| LRFN5    | 8637    | 1309 | -33 | 1800648 | 523320  | 0 | 12 | 5 | 0 | 10 | 19  | 3585988  | 8.49E-01 | 1 |
| STK17B   | 140953  | 373  | 14  | 972236  | 252760  | 0 | 2  | 0 | 0 | 50 | 59  | 18579284 | 8.49E-01 | 1 |
| GPM6B    | 135235  | NaN  | 35  | 938060  | 241012  | 0 | 1  | 0 | 0 | 44 | 52  | 20068432 | 8.49E-01 | 1 |
| AIMP1    | 158895  | 711  | 5   | 877184  | 232468  | 0 | 1  | 1 | 0 | 50 | 61  | 23547620 | 8.49E-01 | 1 |
| SIGLEC14 | 443199  | 644  | -23 | 995020  | 302600  | 0 | 1  | 0 | 0 | 27 | 27  | 10304064 | 8.49E-01 | 1 |



|          |         |     |     |         |         |   |    |   |   |    |     |          |          |   |
|----------|---------|-----|-----|---------|---------|---|----|---|---|----|-----|----------|----------|---|
| ADRA1D   | 805921  | 428 | 14  | 1361700 | 480600  | 0 | 3  | 0 | 0 | 9  | 10  | 4022088  | 8.49E-01 | 1 |
| ZNF646   | 1398193 | 247 | 40  | 4515860 | 1365616 | 0 | 10 | 4 | 0 | 50 | 79  | 26328336 | 8.49E-01 | 1 |
| LRRTM3   | 2412    | 967 | -44 | 1454260 | 419012  | 0 | 7  | 3 | 0 | 7  | 9   | 2336428  | 8.49E-01 | 1 |
| CARD9    | 1194160 | 258 | 28  | 1428272 | 398008  | 0 | 2  | 3 | 0 | 50 | 42  | 16832036 | 8.50E-01 | 1 |
| RRP8     | 424523  | 491 | 17  | 1157712 | 334284  | 0 | 2  | 2 | 0 | 21 | 26  | 9803528  | 8.50E-01 | 1 |
| FOSL1    | 3779084 | 287 | 42  | 668924  | 215380  | 0 | 1  | 0 | 0 | 2  | 1   | 623712   | 8.50E-01 | 1 |
| GPR25    | 545933  | 437 | 12  | 829480  | 330368  | 0 | 1  | 0 | 0 | 10 | 8   | 4377376  | 8.50E-01 | 1 |
| MNX1     | 387871  | 369 | 24  | 1007836 | 349592  | 0 | 1  | 0 | 0 | 50 | 42  | 22575740 | 8.50E-01 | 1 |
| PCDH19   | 128045  | NaN | -15 | 2838744 | 864012  | 0 | 9  | 3 | 0 | 16 | 21  | 6110384  | 8.50E-01 | 1 |
| KIF26A   | 655915  | 468 | 32  | 4488804 | 1604136 | 0 | 7  | 2 | 0 | 26 | 18  | 11173772 | 8.50E-01 | 1 |
| SARS2    | 1794625 | 282 | 21  | 1393028 | 420436  | 0 | 1  | 1 | 0 | 28 | 34  | 11289116 | 8.50E-01 | 1 |
| HELB     | 237928  | 773 | 5   | 2805992 | 735496  | 0 | 6  | 1 | 0 | 50 | 72  | 23996892 | 8.50E-01 | 1 |
| PNN      | 314417  | 166 | 13  | 1871492 | 465292  | 0 | 4  | 0 | 0 | 12 | 11  | 4914936  | 8.50E-01 | 1 |
| LAIR2    | 819283  | 601 | -4  | 390888  | 116412  | 0 | 1  | 0 | 0 | 50 | 111 | 22449716 | 8.50E-01 | 1 |
| ZSWIM1   | 725555  | 209 | 59  | 1207196 | 354220  | 0 | 4  | 0 | 0 | 27 | 40  | 9561092  | 8.50E-01 | 1 |
| TRIM29   | 325456  | 214 | 31  | 1509440 | 411892  | 0 | 3  | 1 | 0 | 37 | 52  | 19834540 | 8.50E-01 | 1 |
| ACCSL    | 389604  | 680 | 1   | 1484164 | 398720  | 0 | 4  | 0 | 0 | 8  | 9   | 3168756  | 8.50E-01 | 1 |
| NDUFS8   | 1263224 | 251 | 47  | 548596  | 153080  | 0 | 1  | 1 | 0 | 15 | 29  | 8327196  | 8.50E-01 | 1 |
| ANKS1B   | 149256  | 941 | -9  | 3465660 | 946248  | 0 | 9  | 6 | 0 | 21 | 23  | 8092592  | 8.50E-01 | 1 |
| FAM8A1   | 470794  | 339 | 13  | 1012464 | 331080  | 0 | 3  | 0 | 0 | 6  | 18  | 5216468  | 8.51E-01 | 1 |
| IL1RAPL2 | 17392   | NaN | -4  | 1787476 | 456392  | 0 | 4  | 1 | 0 | 13 | 11  | 4467444  | 8.51E-01 | 1 |
| TTF2     | 331822  | 566 | 12  | 2994316 | 828056  | 0 | 6  | 5 | 0 | 47 | 57  | 18652264 | 8.51E-01 | 1 |
| DHRS7C   | 77786   | 204 | -62 | 793880  | 229264  | 0 | 2  | 1 | 0 | 40 | 65  | 16189100 | 8.51E-01 | 1 |
| TACR3    | 101583  | 931 | -24 | 1166612 | 343540  | 0 | 5  | 3 | 0 | 12 | 29  | 4677128  | 8.51E-01 | 1 |
| SLC4A5   | 1065336 | 272 | 45  | 2934864 | 826632  | 0 | 7  | 2 | 0 | 50 | 78  | 24840968 | 8.51E-01 | 1 |
| MAD1L1   | 814176  | 544 | 26  | 1862592 | 513708  | 0 | 2  | 1 | 0 | 50 | 75  | 25739156 | 8.51E-01 | 1 |
| GALR1    | 90366   | 614 | -14 | 860096  | 269848  | 0 | 2  | 2 | 0 | 5  | 11  | 3222512  | 8.51E-01 | 1 |
| TMEM101  | 920082  | 241 | 29  | 639020  | 202564  | 0 | 1  | 0 | 0 | 50 | 50  | 17463580 | 8.51E-01 | 1 |
| NLGN4X   | 13333   | NaN | -22 | 2049492 | 585264  | 0 | 3  | 1 | 0 | 1  | 1   | 1610188  | 8.51E-01 | 1 |
| CKB      | 934253  | 225 | 36  | 975440  | 278392  | 0 | 2  | 0 | 0 | 50 | 57  | 18756928 | 8.51E-01 | 1 |
| TRPV6    | 284406  | 645 | 18  | 1855472 | 530440  | 0 | 5  | 3 | 0 | 10 | 13  | 4455340  | 8.51E-01 | 1 |
| CD80     | 290702  | 599 | 38  | 749024  | 198292  | 0 | 1  | 0 | 0 | 50 | 49  | 19375656 | 8.51E-01 | 1 |
| ARL4D    | 1147224 | 172 | 1   | 487008  | 164472  | 0 | 1  | 2 | 0 | 5  | 9   | 2637248  | 8.51E-01 | 1 |

|          |         |      |     |         |        |   |    |   |   |    |     |          |          |   |
|----------|---------|------|-----|---------|--------|---|----|---|---|----|-----|----------|----------|---|
| RGS2     | 307992  | 477  | -15 | 567820  | 130652 | 0 | 1  | 0 | 0 | 50 | 79  | 22972680 | 8.51E-01 | 1 |
| RASSF9   | 22408   | 552  | -27 | 1116416 | 284800 | 0 | 5  | 1 | 0 | 50 | 100 | 20673632 | 8.51E-01 | 1 |
| C21orf2  | 1153513 | 308  | 65  | 640088  | 208972 | 0 | 1  | 0 | 0 | 50 | 59  | 19026776 | 8.51E-01 | 1 |
| CHST7    | 646939  | NaN  | 40  | 1149880 | 414740 | 0 | 2  | 1 | 0 | 50 | 88  | 27404168 | 8.51E-01 | 1 |
| ZNF611   | 536540  | 1010 | -40 | 1830908 | 443932 | 0 | 10 | 2 | 0 | 2  | 6   | 1314352  | 8.51E-01 | 1 |
| RASA1    | 154501  | 726  | 24  | 2727316 | 743684 | 0 | 5  | 0 | 0 | 9  | 94  | 31273888 | 8.51E-01 | 1 |
| AVPR1A   | 250995  | 521  | -32 | 1039164 | 307584 | 0 | 3  | 2 | 0 | 50 | 84  | 20593888 | 8.51E-01 | 1 |
| PLEKHA5  | 149622  | 577  | -29 | 3206848 | 820580 | 0 | 13 | 4 | 0 | 50 | 112 | 26330116 | 8.51E-01 | 1 |
| ISYNA1   | 1384225 | 259  | 42  | 1392672 | 441084 | 0 | 2  | 1 | 0 | 50 | 68  | 24078060 | 8.51E-01 | 1 |
| NDUFS2   | 728669  | 234  | 37  | 1219656 | 341760 | 0 | 3  | 1 | 0 | 39 | 44  | 15898604 | 8.51E-01 | 1 |
| ATXN1    | 109777  | 623  | 30  | 1981140 | 637596 | 0 | 5  | 3 | 0 | 6  | 7   | 2477048  | 8.51E-01 | 1 |
| SLC35F2  | 392825  | 538  | 12  | 956216  | 275188 | 0 | 1  | 1 | 0 | 50 | 55  | 20139632 | 8.51E-01 | 1 |
| SERPINI1 | 145987  | 567  | -12 | 1085088 | 265932 | 0 | 2  | 1 | 0 | 4  | 5   | 1744756  | 8.51E-01 | 1 |
| NAA40    | 1322584 | 277  | 42  | 640444  | 152012 | 0 | 1  | 0 | 0 | 50 | 83  | 26795052 | 8.51E-01 | 1 |
| TRPT1    | 1602391 | 278  | 57  | 657532  | 199004 | 0 | 1  | 0 | 0 | 50 | 67  | 20864092 | 8.52E-01 | 1 |
| PDDC1    | 1788356 | 193  | 48  | 573872  | 166252 | 0 | 1  | 0 | 0 | 50 | 64  | 19157072 | 8.52E-01 | 1 |
| VGLL3    | 55913   | 332  | -18 | 827700  | 232824 | 0 | 1  | 0 | 0 | 37 | 35  | 15501664 | 8.52E-01 | 1 |
| IGFBP3   | 146330  | 623  | 8   | 744396  | 227484 | 0 | 1  | 0 | 0 | 50 | 55  | 20455404 | 8.52E-01 | 1 |
| LRIT2    | 216191  | 860  | -17 | 1353868 | 422216 | 0 | 3  | 2 | 0 | 50 | 78  | 25295580 | 8.52E-01 | 1 |
| MYSM1    | 303727  | 517  | -2  | 2214320 | 527236 | 0 | 5  | 1 | 0 | 13 | 9   | 4131380  | 8.52E-01 | 1 |
| SPINT1   | 1036414 | 172  | 51  | 1358140 | 382700 | 0 | 3  | 2 | 0 | 50 | 67  | 20324396 | 8.52E-01 | 1 |
| TBC1D8B  | 149206  | NaN  | 19  | 2996096 | 749380 | 0 | 9  | 0 | 0 | 0  | 0   | 749380   | 8.52E-01 | 1 |
| ADORA2A  | 611616  | 186  | 54  | 1002496 | 325028 | 0 | 1  | 2 | 0 | 50 | 77  | 20208340 | 8.52E-01 | 1 |
| SQSTM1   | 1610057 | 359  | 38  | 1123536 | 321468 | 0 | 2  | 3 | 0 | 11 | 17  | 4550036  | 8.52E-01 | 1 |
| TBCEL    | 308922  | 724  | 25  | 1097904 | 293700 | 0 | 2  | 1 | 0 | 23 | 30  | 10752980 | 8.52E-01 | 1 |
| HBS1L    | 152992  | 353  | 26  | 3010692 | 827700 | 0 | 4  | 2 | 0 | 36 | 35  | 15395220 | 8.52E-01 | 1 |
| TAGAP    | 509192  | 447  | 41  | 1862948 | 537916 | 0 | 4  | 4 | 0 | 29 | 44  | 15984400 | 8.52E-01 | 1 |
| DCUN1D3  | 252367  | 503  | 32  | 770384  | 211108 | 0 | 1  | 1 | 0 | 28 | 30  | 11000044 | 8.52E-01 | 1 |
| ZIC2     | 323784  | 500  | 35  | 1310792 | 405484 | 0 | 2  | 1 | 0 | 50 | 43  | 17731648 | 8.52E-01 | 1 |
| OR8G1    | 154391  | 921  | -14 | 858672  | 250980 | 0 | 2  | 1 | 0 | 8  | 10  | 3157720  | 8.52E-01 | 1 |
| CSH1     | 1446139 | 380  | 27  | 776080  | 205412 | 0 | 1  | 1 | 0 | 50 | 63  | 18745892 | 8.52E-01 | 1 |
| POLR3F   | 414549  | 436  | 23  | 845144  | 204700 | 0 | 1  | 1 | 0 | 50 | 57  | 25166708 | 8.52E-01 | 1 |
| XRCC3    | 765678  | 266  | 43  | 857960  | 279460 | 0 | 1  | 3 | 0 | 12 | 18  | 3996812  | 8.52E-01 | 1 |

|          |         |      |     |         |        |   |    |   |   |    |    |          |          |   |
|----------|---------|------|-----|---------|--------|---|----|---|---|----|----|----------|----------|---|
| BSDC1    | 1529661 | 216  | 41  | 1156644 | 323604 | 0 | 2  | 0 | 0 | 50 | 65 | 23479268 | 8.52E-01 | 1 |
| FOXB2    | 180535  | 713  | -10 | 1039876 | 347456 | 0 | 1  | 2 | 0 | 9  | 10 | 4747260  | 8.53E-01 | 1 |
| AP1B1    | 849693  | 251  | 36  | 2435752 | 702032 | 0 | 10 | 6 | 0 | 4  | 10 | 1766828  | 8.53E-01 | 1 |
| TRAF3IP1 | 295666  | 345  | 32  | 1822720 | 462800 | 0 | 1  | 0 | 0 | 50 | 47 | 19908588 | 8.53E-01 | 1 |
| APBB1IP  | 236125  | 536  | 19  | 1708800 | 481668 | 0 | 7  | 3 | 0 | 3  | 4  | 1203636  | 8.53E-01 | 1 |
| IIST1H2A | 398813  | 636  | 53  | 314348  | 109648 | 0 | 2  | 0 | 0 | 4  | 8  | 638308   | 8.53E-01 | 1 |
| FAM43B   | 573203  | 429  | 30  | 785692  | 271628 | 0 | 1  | 1 | 0 | 50 | 55 | 21704964 | 8.53E-01 | 1 |
| CYP2S1   | 1098360 | 209  | 13  | 1236744 | 417588 | 0 | 3  | 2 | 0 | 20 | 20 | 6505188  | 8.53E-01 | 1 |
| IL4R     | 227872  | 560  | 25  | 2094704 | 607336 | 0 | 4  | 2 | 0 | 37 | 30 | 13554344 | 8.53E-01 | 1 |
| SLC2A7   | 840956  | 264  | 31  | 1280176 | 410468 | 0 | 3  | 1 | 0 | 50 | 62 | 20541556 | 8.53E-01 | 1 |
| RFC5     | 639801  | 584  | -3  | 901748  | 242080 | 0 | 2  | 0 | 0 | 50 | 91 | 25169556 | 8.53E-01 | 1 |
| PSKH1    | 879834  | 158  | 50  | 1036316 | 333928 | 0 | 2  | 3 | 0 | 13 | 27 | 6013552  | 8.53E-01 | 1 |
| PTPRH    | 1036194 | 199  | 2   | 2833404 | 825564 | 0 | 7  | 3 | 0 | 50 | 57 | 16886504 | 8.53E-01 | 1 |
| FAM120C  | 610328  | NaN  | 28  | 2756864 | 845500 | 0 | 8  | 0 | 0 | 0  | 0  | 845500   | 8.53E-01 | 1 |
| NTAN1    | 564013  | 463  | 22  | 815952  | 221076 | 0 | 1  | 1 | 0 | 50 | 49 | 18364972 | 8.53E-01 | 1 |
| ZFYVE21  | 765678  | 266  | 43  | 612676  | 168032 | 0 | 2  | 0 | 0 | 7  | 12 | 2444296  | 8.53E-01 | 1 |
| C7orf60  | 157620  | 814  | -14 | 1040944 | 276968 | 0 | 4  | 2 | 0 | 14 | 33 | 7901420  | 8.53E-01 | 1 |
| TTC17    | 355422  | 919  | -7  | 2976872 | 782488 | 0 | 10 | 3 | 0 | 50 | 58 | 19428700 | 8.53E-01 | 1 |
| CLCN4    | 168498  | NaN  | 33  | 1919552 | 565684 | 0 | 4  | 1 | 0 | 11 | 17 | 6770764  | 8.53E-01 | 1 |
| TGFB3    | 226588  | 582  | 34  | 1056964 | 291920 | 0 | 1  | 2 | 0 | 16 | 10 | 6190128  | 8.53E-01 | 1 |
| ADRA2A   | 285613  | 547  | -1  | 1110720 | 382344 | 0 | 2  | 1 | 0 | 30 | 33 | 11494172 | 8.53E-01 | 1 |
| DMGDH    | 215159  | 434  | 45  | 2222508 | 621576 | 0 | 4  | 2 | 0 | 17 | 27 | 9981884  | 8.53E-01 | 1 |
| PPP1R15A | 1766061 | 211  | 34  | 1658960 | 514420 | 0 | 5  | 0 | 0 | 7  | 10 | 3608772  | 8.53E-01 | 1 |
| ZNF681   | 445524  | 1441 | -58 | 1684948 | 397652 | 0 | 7  | 2 | 0 | 29 | 56 | 14236796 | 8.54E-01 | 1 |
| EXOSC8   | 176745  | 650  | 16  | 740124  | 192240 | 0 | 1  | 0 | 0 | 50 | 55 | 19294132 | 8.54E-01 | 1 |
| RAET1E   | 423805  | 245  | 34  | 682096  | 180848 | 0 | 1  | 2 | 0 | 18 | 21 | 7899284  | 8.54E-01 | 1 |
| CLRN3    | 434702  | 806  | -25 | 573872  | 161980 | 0 | 1  | 1 | 0 | 50 | 58 | 17294124 | 8.54E-01 | 1 |
| MAP4K5   | 603138  | 207  | 43  | 2279468 | 562480 | 0 | 5  | 0 | 0 | 1  | 0  | 800288   | 8.54E-01 | 1 |
| UBE2O    | 1412378 | 183  | 26  | 3272352 | 945180 | 0 | 6  | 4 | 0 | 50 | 53 | 20215460 | 8.54E-01 | 1 |
| PNMT     | 1284992 | 226  | 38  | 697048  | 220364 | 0 | 1  | 1 | 0 | 50 | 64 | 21003644 | 8.54E-01 | 1 |
| ABHD12B  | 411016  | 431  | 41  | 779284  | 203276 | 0 | 1  | 0 | 0 | 50 | 64 | 24599600 | 8.54E-01 | 1 |
| PRSS33   | 1717244 | 210  | 42  | 680316  | 241368 | 0 | 1  | 1 | 0 | 50 | 80 | 24105472 | 8.54E-01 | 1 |
| ADD2     | 659649  | 592  | 24  | 2087940 | 543612 | 0 | 8  | 0 | 0 | 1  | 0  | 639020   | 8.54E-01 | 1 |

|          |         |      |     |         |         |   |    |   |   |    |     |          |          |   |
|----------|---------|------|-----|---------|---------|---|----|---|---|----|-----|----------|----------|---|
| CLIC2    | NaN     | NaN  | NaN | 649344  | 166608  | 0 | 1  | 0 | 0 | 50 | 116 | 39812192 | 8.54E-01 | 1 |
| CHRN4    | 485971  | 455  | 45  | 1248136 | 372020  | 0 | 2  | 0 | 0 | 4  | 3   | 1981140  | 8.54E-01 | 1 |
| RHOXF2   | NaN     | NaN  | NaN | 1478824 | 398720  | 0 | 1  | 0 | 0 | 50 | 116 | 40044304 | 8.54E-01 | 1 |
| SFN      | 1022828 | 188  | 30  | 621576  | 178356  | 0 | 1  | 1 | 0 | 50 | 67  | 19034252 | 8.54E-01 | 1 |
| IGDCC3   | 646843  | 280  | 40  | 2007128 | 659668  | 0 | 4  | 3 | 0 | 5  | 8   | 3117136  | 8.54E-01 | 1 |
| KCNC2    | 175202  | 822  | -31 | 1630836 | 508368  | 0 | 5  | 1 | 0 | 50 | 74  | 21376376 | 8.54E-01 | 1 |
| TBKBP1   | 1198427 | 217  | 24  | 1526884 | 480956  | 0 | 5  | 3 | 0 | 14 | 21  | 6144560  | 8.54E-01 | 1 |
| DET1     | 212296  | 630  | 4   | 1415456 | 406552  | 0 | 2  | 0 | 0 | 40 | 36  | 16548304 | 8.54E-01 | 1 |
| TPST2    | 162211  | 501  | -14 | 935212  | 297260  | 0 | 1  | 0 | 0 | 5  | 8   | 4713796  | 8.54E-01 | 1 |
| INHBC    | 1347802 | 194  | 32  | 859028  | 276256  | 0 | 1  | 0 | 0 | 50 | 70  | 20818880 | 8.54E-01 | 1 |
| PRTG     | 322073  | 254  | -3  | 2928100 | 843008  | 0 | 8  | 1 | 0 | 3  | 4   | 1757572  | 8.54E-01 | 1 |
| PAPOLB   | NaN     | NaN  | NaN | 1592032 | 452120  | 0 | 4  | 2 | 0 | 50 | 118 | 40097704 | 8.54E-01 | 1 |
| ZNF354C  | 718142  | 781  | -4  | 1455328 | 339980  | 0 | 3  | 2 | 0 | 9  | 11  | 4295852  | 8.54E-01 | 1 |
| REEP1    | 696855  | 425  | 37  | 676756  | 122108  | 0 | 1  | 1 | 0 | 9  | 19  | 6194400  | 8.54E-01 | 1 |
| ZNF629   | 1632278 | 158  | 61  | 2171956 | 624068  | 0 | 5  | 3 | 0 | 47 | 62  | 18440088 | 8.54E-01 | 1 |
| KLK11    | 490795  | 632  | 22  | 779284  | 228908  | 0 | 1  | 0 | 0 | 49 | 56  | 16666496 | 8.55E-01 | 1 |
| LYNX1    | 427585  | 373  | 34  | 546460  | 161624  | 0 | 1  | 0 | 0 | 50 | 60  | 17573228 | 8.55E-01 | 1 |
| NFKBID   | 1060028 | 321  | 47  | 775012  | 265220  | 0 | 1  | 0 | 0 | 50 | 67  | 19297692 | 8.55E-01 | 1 |
| PRG3     | 923815  | 191  | -3  | 594164  | 153436  | 0 | 1  | 0 | 0 | 50 | 67  | 17960912 | 8.55E-01 | 1 |
| GCH1     | 673378  | 380  | 40  | 734072  | 202564  | 0 | 1  | 1 | 0 | 30 | 44  | 16904660 | 8.55E-01 | 1 |
| C11orf42 | 466636  | 728  | 4   | 808120  | 274832  | 0 | 1  | 1 | 0 | 50 | 57  | 22924620 | 8.55E-01 | 1 |
| GPR150   | 307041  | 359  | 32  | 998580  | 395160  | 0 | 1  | 0 | 0 | 50 | 41  | 18933504 | 8.55E-01 | 1 |
| TRAK2    | 511735  | 479  | 26  | 2335004 | 656464  | 0 | 4  | 2 | 0 | 9  | 5   | 3235328  | 8.55E-01 | 1 |
| ANK1     | 574508  | 533  | 36  | 5189768 | 1532224 | 0 | 17 | 4 | 0 | 4  | 10  | 3325752  | 8.55E-01 | 1 |
| SPTBN1   | 714370  | 430  | 22  | 6315796 | 1620512 | 0 | 15 | 9 | 0 | 50 | 58  | 22011124 | 8.55E-01 | 1 |
| DNMT3B   | 675780  | 173  | 42  | 2253124 | 615524  | 0 | 8  | 0 | 0 | 2  | 1   | 978644   | 8.55E-01 | 1 |
| ETHE1    | 416043  | 209  | -10 | 647920  | 196868  | 0 | 1  | 0 | 0 | 50 | 64  | 21352880 | 8.55E-01 | 1 |
| EIF3G    | 1675365 | 272  | 15  | 850840  | 226772  | 0 | 1  | 0 | 0 | 1  | 0   | 604132   | 8.56E-01 | 1 |
| CLDND1   | 390532  | 796  | 2   | 726240  | 186900  | 0 | 1  | 0 | 0 | 50 | 54  | 19516632 | 8.56E-01 | 1 |
| TBC1D7   | 258474  | 423  | 35  | 775368  | 196512  | 0 | 1  | 0 | 0 | 50 | 48  | 18607764 | 8.56E-01 | 1 |
| ALG10    | 23464   | 1025 | -29 | 1199364 | 327876  | 0 | 6  | 1 | 0 | 24 | 45  | 7647592  | 8.56E-01 | 1 |
| IGF1R    | 203046  | 470  | -27 | 3516568 | 954080  | 0 | 10 | 3 | 0 | 26 | 53  | 14891836 | 8.56E-01 | 1 |
| GRM6     | 434745  | 839  | 2   | 2148816 | 702744  | 0 | 7  | 4 | 0 | 15 | 15  | 4822732  | 8.56E-01 | 1 |

|          |         |      |      |         |         |   |    |   |   |    |    |          |          |   |
|----------|---------|------|------|---------|---------|---|----|---|---|----|----|----------|----------|---|
| OR5H14   | 200002  | 811  | -15  | 775368  | 221076  | 0 | 2  | 2 | 0 | 50 | 87 | 21088372 | 8.56E-01 | 1 |
| OR51I1   | 99042   | 1030 | 1    | 779284  | 234248  | 0 | 1  | 0 | 0 | 50 | 49 | 19819232 | 8.56E-01 | 1 |
| BRD8     | 1085933 | 314  | 45   | 3435756 | 941976  | 0 | 9  | 0 | 0 | 1  | 2  | 1443224  | 8.56E-01 | 1 |
| FPGS     | 1194942 | 179  | 58   | 1482028 | 463868  | 0 | 3  | 0 | 0 | 28 | 49 | 17284512 | 8.56E-01 | 1 |
| SYT7     | 1339753 | 274  | 55   | 1044860 | 285868  | 0 | 2  | 0 | 0 | 48 | 47 | 15205116 | 8.56E-01 | 1 |
| PRPF40B  | 2010227 | 265  | 53   | 2281604 | 616948  | 0 | 5  | 3 | 0 | 50 | 68 | 21090864 | 8.56E-01 | 1 |
| IDH3B    | 792941  | 450  | 48   | 1138488 | 318264  | 0 | 2  | 1 | 0 | 50 | 75 | 25450084 | 8.56E-01 | 1 |
| KIF1C    | 1399774 | 343  | 26   | 2788548 | 838380  | 0 | 5  | 3 | 0 | 50 | 79 | 21015392 | 8.56E-01 | 1 |
| CTRC     | 554165  | 212  | 29   | 698828  | 197224  | 0 | 1  | 0 | 0 | 50 | 81 | 24526264 | 8.56E-01 | 1 |
| GFER     | 1747301 | 183  | 46   | 519404  | 151300  | 0 | 1  | 0 | 0 | 50 | 75 | 19137492 | 8.56E-01 | 1 |
| LRRC4B   | 762018  | 517  | 35   | 1710580 | 585620  | 0 | 4  | 4 | 0 | 45 | 54 | 18323320 | 8.56E-01 | 1 |
| NRK      | 18768   | NaN  | 2    | 4082964 | 1108584 | 0 | 4  | 0 | 0 | 8  | 4  | 3862956  | 8.56E-01 | 1 |
| MAPK15   | 2190348 | 229  | 30   | 1360632 | 443220  | 0 | 3  | 2 | 0 | 45 | 64 | 20057040 | 8.56E-01 | 1 |
| CAPZB    | 811050  | 429  | 41   | 722324  | 186544  | 0 | 1  | 1 | 0 | 50 | 54 | 19588188 | 8.56E-01 | 1 |
| CHRNE    | 1416161 | 231  | 30   | 1256324 | 379852  | 0 | 3  | 1 | 0 | 50 | 65 | 18681100 | 8.56E-01 | 1 |
| IL2RB    | 668971  | 289  | 53   | 1386976 | 420080  | 0 | 2  | 0 | 0 | 28 | 17 | 7339296  | 8.56E-01 | 1 |
| CSE1L    | 862939  | 155  | 50   | 2558572 | 658244  | 0 | 10 | 4 | 0 | 24 | 38 | 10888616 | 8.56E-01 | 1 |
| ZNRF3    | 693562  | 326  | -13  | 2080108 | 633680  | 0 | 5  | 0 | 0 | 0  | 0  | 633680   | 8.56E-01 | 1 |
| GLE1     | 1917147 | 160  | 39   | 1831620 | 487008  | 0 | 2  | 1 | 0 | 50 | 81 | 26625596 | 8.56E-01 | 1 |
| MRPL9    | 1062482 | 255  | 29   | 699184  | 211820  | 0 | 1  | 1 | 0 | 12 | 10 | 4320060  | 8.57E-01 | 1 |
| SEC31A   | 775541  | 268  | 38   | 3153804 | 871488  | 0 | 7  | 4 | 0 | 50 | 53 | 22497420 | 8.57E-01 | 1 |
| KRT25    | 836683  | 269  | -10  | 1149880 | 327164  | 0 | 3  | 1 | 0 | 22 | 26 | 7229292  | 8.57E-01 | 1 |
| ITGAV    | 266463  | 373  | 7    | 2784276 | 752940  | 0 | 10 | 6 | 0 | 15 | 20 | 5707748  | 8.57E-01 | 1 |
| C17orf47 | 892839  | 376  | 10   | 1395164 | 438592  | 0 | 6  | 3 | 0 | 50 | 67 | 14367804 | 8.57E-01 | 1 |
| LAG3     | 2816186 | 232  | 48   | 1289788 | 427556  | 0 | 2  | 2 | 0 | 6  | 24 | 6345344  | 8.57E-01 | 1 |
| OR4N4    | 156689  | 855  | -31  | 779284  | 235316  | 0 | 1  | 0 | 0 | 50 | 68 | 20763700 | 8.57E-01 | 1 |
| THNSL2   | 180956  | 612  | 6    | 1232472 | 355644  | 0 | 1  | 1 | 0 | 50 | 41 | 17753008 | 8.57E-01 | 1 |
| PSMB6    | 1368906 | 195  | 28   | 607692  | 186900  | 0 | 1  | 1 | 0 | 50 | 66 | 19691784 | 8.57E-01 | 1 |
| GYLTL1B  | 427820  | 291  | 48   | 1803852 | 564972  | 0 | 3  | 0 | 0 | 24 | 32 | 10815992 | 8.57E-01 | 1 |
| MN1      | 107535  | 256  | -110 | 3200084 | 1036672 | 0 | 6  | 1 | 0 | 19 | 13 | 6542924  | 8.57E-01 | 1 |
| KLF13    | 204790  | 324  | 35   | 700964  | 229264  | 0 | 1  | 1 | 0 | 50 | 54 | 18706732 | 8.58E-01 | 1 |
| PQBP1    | 834040  | NaN  | 38   | 698828  | 185476  | 0 | 1  | 0 | 0 | 50 | 43 | 14994364 | 8.58E-01 | 1 |
| CDH18    | 4731    | 1195 | -17  | 2039168 | 537916  | 0 | 13 | 5 | 0 | 19 | 34 | 6534380  | 8.58E-01 | 1 |

|          |         |      |     |         |         |   |    |   |   |    |     |          |          |   |
|----------|---------|------|-----|---------|---------|---|----|---|---|----|-----|----------|----------|---|
| CLIC3    | 1979517 | 188  | 34  | 600928  | 184052  | 0 | 2  | 1 | 0 | 16 | 30  | 5786424  | 8.58E-01 | 1 |
| OR1M1    | 311030  | 471  | -63 | 763620  | 241368  | 0 | 2  | 3 | 0 | 20 | 24  | 5614120  | 8.58E-01 | 1 |
| MS4A7    | 433906  | 899  | 24  | 618728  | 179068  | 0 | 1  | 1 | 0 | 16 | 14  | 4743700  | 8.58E-01 | 1 |
| PELI1    | 379419  | 441  | 35  | 1072628 | 295480  | 0 | 2  | 0 | 0 | 27 | 32  | 10577116 | 8.58E-01 | 1 |
| MAPK8IP1 | 427820  | 291  | 48  | 1788188 | 540052  | 0 | 3  | 2 | 0 | 50 | 52  | 20813896 | 8.58E-01 | 1 |
| CASR     | 557700  | 602  | 41  | 2725180 | 785336  | 0 | 5  | 1 | 0 | 50 | 70  | 22732736 | 8.58E-01 | 1 |
| PXMP4    | 714390  | 161  | 56  | 537560  | 157708  | 0 | 1  | 0 | 0 | 50 | 83  | 20010760 | 8.58E-01 | 1 |
| ZNF280B  | 201933  | 683  | 23  | 1381992 | 365256  | 0 | 2  | 0 | 0 | 50 | 138 | 46792640 | 8.58E-01 | 1 |
| ELOVL2   | 270200  | 422  | 22  | 785336  | 196156  | 0 | 1  | 1 | 0 | 35 | 33  | 13099020 | 8.58E-01 | 1 |
| FZD4     | 195696  | 281  | -12 | 1338560 | 389464  | 0 | 2  | 0 | 0 | 50 | 60  | 24260332 | 8.58E-01 | 1 |
| PPFIA2   | 20298   | 1132 | -25 | 3294068 | 868996  | 0 | 12 | 2 | 0 | 8  | 18  | 3972960  | 8.58E-01 | 1 |
| INF2     | 651235  | 241  | 21  | 3133512 | 999648  | 0 | 8  | 6 | 0 | 46 | 56  | 16932784 | 8.58E-01 | 1 |
| PODN     | 491749  | 391  | 14  | 1631548 | 534356  | 0 | 4  | 4 | 0 | 12 | 10  | 3951956  | 8.58E-01 | 1 |
| RNPS1    | 2220466 | 233  | 46  | 777504  | 228552  | 0 | 1  | 1 | 0 | 50 | 67  | 22076272 | 8.58E-01 | 1 |
| CCNL2    | 1736268 | 273  | 28  | 1337136 | 402636  | 0 | 5  | 1 | 0 | 1  | 1   | 562480   | 8.58E-01 | 1 |
| MAMSTR   | 1635420 | 190  | 44  | 1021720 | 349592  | 0 | 2  | 1 | 0 | 50 | 73  | 21072352 | 8.58E-01 | 1 |
| PNLIP    | 128161  | 704  | -16 | 1223216 | 321112  | 0 | 4  | 4 | 0 | 7  | 15  | 2983992  | 8.58E-01 | 1 |
| SYNJ1    | 355341  | 345  | 65  | 4180508 | 1160560 | 0 | 11 | 1 | 0 | 8  | 11  | 4629068  | 8.58E-01 | 1 |
| GATSL2   | NaN     | NaN  | NaN | 847636  | 243860  | 0 | 1  | 0 | 0 | 50 | 116 | 39889444 | 8.58E-01 | 1 |
| C2CD4B   | NaN     | NaN  | NaN | 835176  | 338556  | 0 | 1  | 0 | 0 | 50 | 116 | 39984140 | 8.58E-01 | 1 |
| HIF1AN   | 1127095 | 264  | 39  | 923820  | 229620  | 0 | 2  | 2 | 0 | 50 | 74  | 20907168 | 8.58E-01 | 1 |
| MGAT4B   | 1610057 | 359  | 38  | 1535428 | 439304  | 0 | 3  | 1 | 0 | 50 | 48  | 18056676 | 8.59E-01 | 1 |
| CD55     | 500581  | 191  | 20  | 1146320 | 309364  | 0 | 2  | 1 | 0 | 50 | 52  | 18195160 | 8.59E-01 | 1 |
| NLRP7    | 840563  | 573  | -15 | 2636892 | 731580  | 0 | 10 | 4 | 0 | 50 | 100 | 21516284 | 8.59E-01 | 1 |
| ARFGAP2  | 1206881 | 273  | 24  | 1369176 | 369528  | 0 | 2  | 0 | 0 | 50 | 49  | 20651560 | 8.59E-01 | 1 |
| PCSK7    | 431523  | 199  | 41  | 2009620 | 572804  | 0 | 5  | 1 | 0 | 17 | 16  | 6704548  | 8.59E-01 | 1 |
| ORAI2    | 579276  | 202  | 61  | 624424  | 201140  | 0 | 1  | 2 | 0 | 30 | 42  | 9572128  | 8.59E-01 | 1 |
| B4GALT1  | 901836  | 181  | 28  | 993952  | 305804  | 0 | 2  | 0 | 0 | 50 | 89  | 27149984 | 8.59E-01 | 1 |
| LIN54    | 667566  | 169  | 45  | 1888224 | 566040  | 0 | 4  | 0 | 0 | 3  | 2   | 1625496  | 8.59E-01 | 1 |
| GHDC     | 2129732 | 206  | 30  | 1372736 | 457816  | 0 | 3  | 0 | 0 | 15 | 27  | 8388428  | 8.59E-01 | 1 |
| AVPR1B   | 755856  | 400  | 10  | 1017448 | 348524  | 0 | 3  | 4 | 0 | 11 | 13  | 3503752  | 8.59E-01 | 1 |
| GALNT13  | 21842   | 1035 | -13 | 1458176 | 369172  | 0 | 4  | 0 | 0 | 40 | 65  | 19663304 | 8.59E-01 | 1 |
| INHBA    | 42008   | 671  | -27 | 1074408 | 297972  | 0 | 4  | 1 | 0 | 50 | 80  | 18444716 | 8.59E-01 | 1 |

|          |         |      |     |          |         |   |    |   |   |    |     |          |          |   |
|----------|---------|------|-----|----------|---------|---|----|---|---|----|-----|----------|----------|---|
| KIAA1524 | 214268  | 867  | 2   | 2372740  | 615524  | 0 | 5  | 0 | 0 | 2  | 2   | 1460668  | 8.59E-01 | 1 |
| TIMELESS | 2793663 | 184  | 61  | 3136716  | 856536  | 0 | 9  | 7 | 0 | 15 | 27  | 7752256  | 8.59E-01 | 1 |
| ZNF302   | 910826  | 607  | -54 | 1055896  | 242792  | 0 | 3  | 2 | 0 | 50 | 132 | 31086632 | 8.59E-01 | 1 |
| KCND3    | 320241  | 623  | 23  | 1642940  | 488788  | 0 | 3  | 4 | 0 | 19 | 16  | 6985788  | 8.59E-01 | 1 |
| KRT82    | 1065603 | 213  | 35  | 1306876  | 374156  | 0 | 3  | 2 | 0 | 50 | 54  | 16033884 | 8.59E-01 | 1 |
| RBM22    | 1107515 | 211  | 54  | 1092564  | 299040  | 0 | 2  | 0 | 0 | 21 | 38  | 12090472 | 8.59E-01 | 1 |
| TBX22    | 26689   | NaN  | -26 | 1346748  | 358848  | 0 | 4  | 2 | 0 | 50 | 120 | 30826752 | 8.59E-01 | 1 |
| OR52A1   | 109516  | 1024 | -15 | 774656   | 226060  | 0 | 1  | 0 | 0 | 50 | 47  | 18695696 | 8.59E-01 | 1 |
| ECD      | 653488  | 233  | 44  | 1767896  | 466360  | 0 | 3  | 3 | 0 | 9  | 12  | 3920984  | 8.59E-01 | 1 |
| MTX2     | 239999  | 888  | 11  | 709508   | 174796  | 0 | 1  | 1 | 0 | 50 | 76  | 20894708 | 8.59E-01 | 1 |
| FAM58A   | 940418  | NaN  | 24  | 629052   | 184764  | 0 | 1  | 0 | 0 | 50 | 66  | 17527304 | 8.59E-01 | 1 |
| NR3C1    | 138106  | 270  | 41  | 2024216  | 559276  | 0 | 6  | 1 | 0 | 31 | 50  | 13893968 | 8.59E-01 | 1 |
| SLC39A13 | 1022438 | 245  | 47  | 934144   | 300464  | 0 | 1  | 2 | 0 | 50 | 66  | 23883684 | 8.59E-01 | 1 |
| TBC1D26  | 730837  | 431  | -16 | 672840   | 173016  | 0 | 1  | 0 | 0 | 50 | 68  | 22280260 | 8.59E-01 | 1 |
| LSM12    | 916863  | 198  | 23  | 510148   | 134924  | 0 | 1  | 1 | 0 | 50 | 69  | 17825988 | 8.59E-01 | 1 |
| DDX28    | 863919  | 158  | 54  | 1276260  | 459240  | 0 | 1  | 1 | 0 | 50 | 81  | 22845944 | 8.59E-01 | 1 |
| MYLK4    | 470344  | 285  | 28  | 1043792  | 249556  | 0 | 2  | 2 | 0 | 30 | 30  | 9906768  | 8.59E-01 | 1 |
| HS3ST5   | 217498  | 675  | -8  | 871844   | 246352  | 0 | 3  | 2 | 0 | 2  | 2   | 895340   | 8.60E-01 | 1 |
| ZBTB7C   | 110354  | 212  | 61  | 1540056  | 452832  | 0 | 1  | 1 | 0 | 50 | 61  | 21476768 | 8.60E-01 | 1 |
| ZNF506   | 575637  | 609  | -50 | 1160560  | 278036  | 0 | 3  | 1 | 0 | 50 | 113 | 30023972 | 8.60E-01 | 1 |
| NUP160   | 931839  | 158  | 14  | 3744764  | 1011040 | 0 | 8  | 4 | 0 | 50 | 49  | 22919280 | 8.60E-01 | 1 |
| MYT1     | 812501  | 312  | 48  | 2897128  | 785336  | 0 | 8  | 3 | 0 | 50 | 65  | 20645152 | 8.60E-01 | 1 |
| ARIH1    | 1093921 | 432  | 37  | 1495200  | 348168  | 0 | 4  | 0 | 0 | 13 | 16  | 5215400  | 8.60E-01 | 1 |
| GALR2    | 1611239 | 218  | 22  | 923464   | 328232  | 0 | 4  | 4 | 0 | 6  | 25  | 4671788  | 8.60E-01 | 1 |
| S1PR5    | 2036812 | 226  | 23  | 917768   | 364900  | 0 | 2  | 2 | 0 | 50 | 81  | 22329032 | 8.60E-01 | 1 |
| SLC35E3  | 534146  | 294  | 25  | 787828   | 235316  | 0 | 1  | 2 | 0 | 50 | 50  | 16078384 | 8.60E-01 | 1 |
| KRT27    | 836683  | 269  | -10 | 1169104  | 336776  | 0 | 1  | 2 | 0 | 50 | 63  | 16537268 | 8.60E-01 | 1 |
| GABRD    | 1252791 | 279  | 38  | 1145608  | 342116  | 0 | 2  | 1 | 0 | 50 | 65  | 22176664 | 8.60E-01 | 1 |
| MUC5B    | 1400716 | 311  | 46  | 13841280 | 4840176 | 0 | 33 | 9 | 0 | 5  | 13  | 7063040  | 8.60E-01 | 1 |
| CD3EAP   | 1259254 | 191  | 39  | 1254544  | 393380  | 0 | 2  | 1 | 0 | 50 | 63  | 21808204 | 8.60E-01 | 1 |
| PUM1     | 498145  | 189  | 36  | 3029916  | 869352  | 0 | 10 | 2 | 0 | 0  | 2   | 869352   | 8.60E-01 | 1 |
| CNDP1    | 162886  | 941  | 13  | 1304384  | 370240  | 0 | 3  | 2 | 0 | 50 | 73  | 24982656 | 8.60E-01 | 1 |
| PXN      | 1615004 | 187  | 57  | 1516916  | 426844  | 0 | 3  | 0 | 0 | 14 | 12  | 4982220  | 8.60E-01 | 1 |

|          |         |      |     |         |         |   |    |   |   |    |     |          |          |   |
|----------|---------|------|-----|---------|---------|---|----|---|---|----|-----|----------|----------|---|
| PTRH1    | 1098647 | 172  | 32  | 524032  | 186188  | 0 | 1  | 0 | 0 | 50 | 71  | 18037452 | 8.60E-01 | 1 |
| WTIP     | 707545  | 355  | 5   | 1051980 | 358848  | 0 | 1  | 1 | 0 | 50 | 60  | 23415544 | 8.60E-01 | 1 |
| SLC25A34 | 683349  | 174  | 22  | 740124  | 254184  | 0 | 1  | 0 | 0 | 50 | 63  | 23254276 | 8.60E-01 | 1 |
| ACTBL2   | 160055  | 456  | 3   | 933432  | 276612  | 0 | 1  | 1 | 0 | 50 | 43  | 18277396 | 8.60E-01 | 1 |
| STK36    | 1033606 | 269  | 43  | 3313648 | 1013888 | 0 | 9  | 2 | 0 | 3  | 7   | 2924184  | 8.60E-01 | 1 |
| MAGEA11  | NaN     | NaN  | NaN | 1100396 | 306160  | 0 | 2  | 0 | 0 | 50 | 116 | 39951744 | 8.61E-01 | 1 |
| AXL      | 1180169 | 214  | 15  | 2279112 | 669636  | 0 | 6  | 1 | 0 | 20 | 25  | 8335384  | 8.61E-01 | 1 |
| CECR1    | 305072  | 574  | -55 | 1354936 | 356000  | 0 | 2  | 1 | 0 | 50 | 114 | 30165304 | 8.61E-01 | 1 |
| LUC7L    | 1267639 | 220  | 36  | 967252  | 265220  | 0 | 2  | 1 | 0 | 50 | 56  | 16678244 | 8.61E-01 | 1 |
| PAQR9    | 397648  | 422  | 17  | 913140  | 297972  | 0 | 1  | 2 | 0 | 50 | 45  | 19439380 | 8.61E-01 | 1 |
| HSPA1A   | 2509866 | 183  | 32  | 1573876 | 483092  | 0 | 3  | 2 | 0 | 7  | 9   | 3981504  | 8.61E-01 | 1 |
| MAP3K3   | 934952  | 247  | 3   | 1714496 | 462088  | 0 | 3  | 0 | 0 | 3  | 2   | 1410116  | 8.61E-01 | 1 |
| CPNE3    | 192772  | 1166 | 22  | 1426492 | 361340  | 0 | 5  | 3 | 0 | 10 | 12  | 3772176  | 8.61E-01 | 1 |
| HOXB9    | 909944  | 509  | 28  | 626560  | 181916  | 0 | 1  | 0 | 0 | 50 | 58  | 17672908 | 8.61E-01 | 1 |
| IGSF9B   | 270106  | 534  | -8  | 3343196 | 1063372 | 0 | 8  | 4 | 0 | 41 | 45  | 18251052 | 8.61E-01 | 1 |
| SLCO5A1  | 145499  | 674  | 16  | 2132796 | 621576  | 0 | 9  | 6 | 0 | 8  | 18  | 3258468  | 8.61E-01 | 1 |
| SSH1     | 474364  | 293  | 45  | 2935220 | 842296  | 0 | 3  | 2 | 0 | 31 | 33  | 15053104 | 8.61E-01 | 1 |
| FTSJ2    | 814176  | 430  | 38  | 621576  | 189036  | 0 | 3  | 3 | 0 | 4  | 9   | 1531512  | 8.62E-01 | 1 |
| LSM11    | 243382  | 987  | 31  | 868284  | 303312  | 0 | 1  | 0 | 0 | 50 | 48  | 18799648 | 8.62E-01 | 1 |
| POLDIP2  | 1405196 | 214  | 10  | 950520  | 273408  | 0 | 3  | 0 | 0 | 3  | 2   | 766468   | 8.62E-01 | 1 |
| FRMD5    | 929260  | 504  | 33  | 1482740 | 402280  | 0 | 4  | 2 | 0 | 50 | 60  | 17397364 | 8.62E-01 | 1 |
| C1orf27  | 277882  | 399  | -14 | 1208620 | 304736  | 0 | 1  | 1 | 0 | 50 | 30  | 18183768 | 8.62E-01 | 1 |
| POC1A    | 1096747 | 193  | 52  | 1055184 | 299040  | 0 | 4  | 2 | 0 | 20 | 29  | 6954816  | 8.62E-01 | 1 |
| OR1C1    | 164924  | 995  | -27 | 771096  | 236028  | 0 | 2  | 1 | 0 | 50 | 130 | 29092676 | 8.62E-01 | 1 |
| STX16    | 1026997 | 504  | 15  | 846924  | 231756  | 0 | 2  | 1 | 0 | 42 | 57  | 14881868 | 8.62E-01 | 1 |
| GPR179   | 1101194 | 504  | 10  | 5832704 | 1799224 | 0 | 20 | 4 | 0 | 15 | 20  | 6907824  | 8.62E-01 | 1 |
| USP10    | 494151  | 258  | 31  | 2027064 | 588468  | 0 | 5  | 2 | 0 | 50 | 60  | 19276332 | 8.62E-01 | 1 |
| DAB1     | 22463   | 1004 | -12 | 1447496 | 389464  | 0 | 2  | 2 | 0 | 50 | 80  | 23854136 | 8.62E-01 | 1 |
| CBFA2T3  | 967879  | 252  | 41  | 1632972 | 509436  | 0 | 4  | 0 | 0 | 5  | 9   | 3798876  | 8.62E-01 | 1 |
| RACGAP1  | 1018478 | 211  | 52  | 1643652 | 452832  | 0 | 5  | 2 | 0 | 50 | 59  | 16479240 | 8.62E-01 | 1 |
| GANAB    | 2560761 | 217  | 47  | 2495560 | 707372  | 0 | 9  | 3 | 0 | 8  | 13  | 4768620  | 8.62E-01 | 1 |
| CHD9     | 228561  | 675  | -9  | 7410496 | 1981496 | 0 | 23 | 3 | 0 | 0  | 3   | 1981496  | 8.63E-01 | 1 |
| TBRG1    | 171901  | 604  | 9   | 1054828 | 299396  | 0 | 1  | 0 | 0 | 14 | 15  | 8435776  | 8.63E-01 | 1 |



|          |         |      |     |         |         |   |    |   |   |    |     |          |          |   |
|----------|---------|------|-----|---------|---------|---|----|---|---|----|-----|----------|----------|---|
| SENP7    | 555098  | 622  | 1   | 2768612 | 697048  | 0 | 5  | 4 | 0 | 50 | 103 | 28199828 | 8.63E-01 | 1 |
| SLC7A7   | 1153069 | 351  | 36  | 1289788 | 389108  | 0 | 3  | 2 | 0 | 50 | 63  | 17715984 | 8.63E-01 | 1 |
| SESN2    | 766835  | 170  | 29  | 1218944 | 360628  | 0 | 2  | 0 | 0 | 4  | 3   | 1922044  | 8.63E-01 | 1 |
| DLG3     | 306369  | NaN  | 30  | 2354228 | 648988  | 0 | 3  | 2 | 0 | 50 | 60  | 23823520 | 8.63E-01 | 1 |
| MED12L   | 98951   | 632  | 9   | 5552532 | 1504812 | 0 | 15 | 6 | 0 | 50 | 73  | 23333664 | 8.63E-01 | 1 |
| CLDN3    | 1082063 | 214  | 54  | 524032  | 184052  | 0 | 1  | 1 | 0 | 13 | 28  | 7303340  | 8.63E-01 | 1 |
| P2RY14   | 130485  | 632  | 8   | 854400  | 236028  | 0 | 2  | 3 | 0 | 4  | 3   | 873980   | 8.63E-01 | 1 |
| NUCB2    | 522189  | 387  | 19  | 1157356 | 241724  | 0 | 2  | 0 | 0 | 37 | 43  | 15205116 | 8.63E-01 | 1 |
| MGAM     | 196155  | 846  | -7  | 4857976 | 1295840 | 0 | 12 | 4 | 0 | 50 | 65  | 21414468 | 8.63E-01 | 1 |
| MUC13    | 364165  | 212  | 42  | 1326456 | 360984  | 0 | 2  | 2 | 0 | 50 | 49  | 19028200 | 8.63E-01 | 1 |
| SIGLEC7  | 355132  | 632  | 1   | 1172308 | 354932  | 0 | 2  | 0 | 0 | 50 | 65  | 22303756 | 8.63E-01 | 1 |
| HADHA    | 641003  | 274  | 38  | 1970816 | 558208  | 0 | 4  | 1 | 0 | 46 | 69  | 19778648 | 8.63E-01 | 1 |
| ABR      | 1346718 | 270  | 22  | 2359568 | 638308  | 0 | 5  | 3 | 0 | 50 | 58  | 20111864 | 8.63E-01 | 1 |
| CA11     | 1597109 | 242  | 31  | 831616  | 256676  | 0 | 1  | 1 | 0 | 50 | 57  | 20781500 | 8.63E-01 | 1 |
| FAM73B   | 1473097 | 203  | 29  | 1501964 | 461020  | 0 | 2  | 0 | 0 | 50 | 40  | 18400572 | 8.63E-01 | 1 |
| PPAP2C   | 233160  | 578  | -13 | 817732  | 257744  | 0 | 1  | 0 | 0 | 50 | 46  | 18336136 | 8.63E-01 | 1 |
| DHCR24   | 465622  | 249  | 27  | 1322896 | 367748  | 0 | 2  | 0 | 0 | 5  | 2   | 1196872  | 8.63E-01 | 1 |
| BSCL2    | 2425755 | 248  | 51  | 1178716 | 349592  | 0 | 3  | 0 | 0 | 2  | 0   | 601284   | 8.63E-01 | 1 |
| LYSMD4   | 173729  | 507  | 16  | 753296  | 218584  | 0 | 1  | 0 | 0 | 50 | 47  | 18551516 | 8.63E-01 | 1 |
| BATF2    | 3151458 | 209  | 52  | 664652  | 224992  | 0 | 1  | 0 | 0 | 50 | 83  | 23753744 | 8.63E-01 | 1 |
| CAPN2    | 528883  | 407  | 2   | 1858320 | 478464  | 0 | 3  | 1 | 0 | 50 | 48  | 20497056 | 8.63E-01 | 1 |
| CACYBP   | 176818  | 828  | 4   | 608048  | 147028  | 0 | 1  | 0 | 0 | 50 | 65  | 19765832 | 8.63E-01 | 1 |
| TNK1     | 1911735 | 206  | 36  | 1625496 | 546816  | 0 | 2  | 0 | 0 | 8  | 13  | 4624440  | 8.63E-01 | 1 |
| ZIC1     | 20725   | 1070 | -30 | 1114992 | 328944  | 0 | 12 | 3 | 0 | 1  | 4   | 634748   | 8.63E-01 | 1 |
| PIP5K1B  | 184422  | 543  | 27  | 1415100 | 371664  | 0 | 2  | 0 | 0 | 27 | 24  | 10409084 | 8.63E-01 | 1 |
| PDE9A    | 411822  | 331  | 69  | 1700612 | 371308  | 0 | 4  | 2 | 0 | 50 | 66  | 21754448 | 8.63E-01 | 1 |
| SEZ6L    | 196333  | 672  | -62 | 2587764 | 764688  | 0 | 11 | 3 | 0 | 3  | 5   | 1483808  | 8.63E-01 | 1 |
| CALCR    | 197869  | 823  | -10 | 1352800 | 337844  | 0 | 8  | 3 | 0 | 5  | 9   | 1946964  | 8.64E-01 | 1 |
| ARHGEF15 | 772200  | 257  | 20  | 2060172 | 701676  | 0 | 5  | 1 | 0 | 21 | 24  | 8505196  | 8.64E-01 | 1 |
| PRAMEF15 | NaN     | NaN  | NaN | 1197228 | 337488  | 0 | 3  | 3 | 0 | 26 | 43  | 11914608 | 8.64E-01 | 1 |
| UBAC1    | 753354  | 352  | 37  | 1051624 | 287648  | 0 | 1  | 1 | 0 | 50 | 47  | 22131096 | 8.64E-01 | 1 |
| GLI1     | 1347802 | 194  | 32  | 2723400 | 870420  | 0 | 10 | 4 | 0 | 50 | 70  | 20818880 | 8.64E-01 | 1 |
| RXFP4    | 1880483 | 213  | 32  | 883236  | 319332  | 0 | 2  | 3 | 0 | 27 | 52  | 11843052 | 8.64E-01 | 1 |

|          |         |     |     |         |         |   |    |   |   |    |     |          |          |   |
|----------|---------|-----|-----|---------|---------|---|----|---|---|----|-----|----------|----------|---|
| VN1R1    | 451095  | 869 | -24 | 887508  | 246708  | 0 | 2  | 0 | 0 | 50 | 68  | 17938840 | 8.64E-01 | 1 |
| OR10X1   | 179404  | 940 | 1   | 794948  | 243148  | 0 | 2  | 2 | 0 | 6  | 15  | 3888232  | 8.64E-01 | 1 |
| PBRM1    | 1217701 | 231 | 47  | 4281256 | 1081172 | 0 | 21 | 3 | 0 | 2  | 12  | 2685664  | 8.64E-01 | 1 |
| F3       | 411634  | 258 | -7  | 787472  | 182272  | 0 | 1  | 1 | 0 | 50 | 63  | 23803228 | 8.64E-01 | 1 |
| COPS7A   | 2816186 | 232 | 48  | 700252  | 213956  | 0 | 1  | 0 | 0 | 6  | 24  | 6345344  | 8.64E-01 | 1 |
| MYH15    | 257473  | 874 | 3   | 5130316 | 1285160 | 0 | 17 | 3 | 0 | 50 | 65  | 21007916 | 8.64E-01 | 1 |
| SLC25A35 | 870950  | 218 | 18  | 870064  | 229976  | 0 | 1  | 1 | 0 | 50 | 57  | 18595660 | 8.64E-01 | 1 |
| UBE2J2   | 2050211 | 196 | 28  | 716984  | 195088  | 0 | 1  | 1 | 0 | 50 | 71  | 21421944 | 8.64E-01 | 1 |
| RPS6KA3  | 242944  | NaN | 36  | 1957644 | 506232  | 0 | 7  | 0 | 0 | 0  | 0   | 506232   | 8.64E-01 | 1 |
| DNAJC18  | 832127  | 177 | 48  | 942688  | 239588  | 0 | 2  | 0 | 0 | 40 | 65  | 18544396 | 8.64E-01 | 1 |
| LRRN2    | 401240  | 221 | 35  | 1699544 | 588112  | 0 | 2  | 2 | 0 | 33 | 22  | 12231804 | 8.64E-01 | 1 |
| CBX5     | 753625  | 205 | 59  | 513708  | 118548  | 0 | 1  | 1 | 0 | 33 | 48  | 11939884 | 8.64E-01 | 1 |
| HMHA1    | 2387949 | 206 | 26  | 2871852 | 865080  | 0 | 6  | 2 | 0 | 50 | 78  | 32398136 | 8.64E-01 | 1 |
| TWISTNB  | 168714  | 941 | -11 | 868284  | 232824  | 0 | 2  | 1 | 0 | 16 | 19  | 5176240  | 8.65E-01 | 1 |
| FAM153B  | 592877  | 609 | 19  | 1077612 | 257388  | 0 | 2  | 0 | 0 | 21 | 22  | 7004656  | 8.65E-01 | 1 |
| OR7G2    | 311030  | 471 | -63 | 844076  | 262372  | 0 | 2  | 2 | 0 | 50 | 102 | 27434784 | 8.65E-01 | 1 |
| TMEM209  | 414437  | 266 | 34  | 1474196 | 386260  | 0 | 4  | 0 | 0 | 50 | 59  | 18847352 | 8.65E-01 | 1 |
| TMEM156  | 435367  | 152 | 49  | 779996  | 197224  | 0 | 1  | 0 | 0 | 50 | 49  | 18176648 | 8.65E-01 | 1 |
| P4HA3    | 641945  | 201 | 37  | 1388044 | 411536  | 0 | 2  | 1 | 0 | 48 | 49  | 20114356 | 8.65E-01 | 1 |
| TUB      | 189808  | 555 | 12  | 1481672 | 412960  | 0 | 2  | 0 | 0 | 50 | 49  | 21584280 | 8.65E-01 | 1 |
| TMC7     | 850990  | 171 | 18  | 1877900 | 505876  | 0 | 4  | 3 | 0 | 10 | 19  | 5365988  | 8.65E-01 | 1 |
| TTC25    | 1969457 | 191 | 28  | 1589540 | 406552  | 0 | 4  | 1 | 0 | 50 | 66  | 20772956 | 8.65E-01 | 1 |
| MTMR6    | 330431  | 538 | 31  | 1643652 | 404772  | 0 | 4  | 2 | 0 | 43 | 63  | 20749104 | 8.65E-01 | 1 |
| BCL2L10  | 540700  | 195 | 21  | 494484  | 168744  | 0 | 1  | 2 | 0 | 3  | 3   | 1109296  | 8.65E-01 | 1 |
| FOXO4    | 759088  | NaN | 27  | 1229268 | 400500  | 0 | 2  | 1 | 0 | 50 | 74  | 25911460 | 8.65E-01 | 1 |
| CLDN4    | 1099366 | 208 | 37  | 503028  | 169812  | 0 | 3  | 2 | 0 | 3  | 7   | 1131012  | 8.65E-01 | 1 |
| ADCY6    | 1715886 | 328 | 38  | 2943052 | 892136  | 0 | 10 | 2 | 0 | 5  | 7   | 2313288  | 8.65E-01 | 1 |
| CLEC12A  | 305376  | 565 | 19  | 707372  | 166252  | 0 | 1  | 1 | 0 | 5  | 5   | 2335716  | 8.65E-01 | 1 |
| FKBP9    | 375055  | 235 | 13  | 1452124 | 415808  | 0 | 5  | 3 | 0 | 4  | 5   | 1737280  | 8.65E-01 | 1 |
| DEPDC1B  | 166902  | 679 | 13  | 1386976 | 356000  | 0 | 4  | 1 | 0 | 50 | 69  | 18171664 | 8.65E-01 | 1 |
| ZNF672   | 411701  | 567 | -4  | 1090072 | 361340  | 0 | 2  | 1 | 0 | 2  | 1   | 1058388  | 8.65E-01 | 1 |
| TECTB    | 170055  | 567 | -5  | 872556  | 223212  | 0 | 2  | 1 | 0 | 50 | 65  | 18974444 | 8.65E-01 | 1 |
| OR10G2   | 658946  | 624 | 20  | 746888  | 248488  | 0 | 1  | 0 | 0 | 49 | 65  | 23465740 | 8.65E-01 | 1 |

|          |         |      |     |         |         |   |    |   |   |    |     |          |          |   |
|----------|---------|------|-----|---------|---------|---|----|---|---|----|-----|----------|----------|---|
| TSNARE1  | 163885  | 685  | 12  | 1310792 | 391600  | 0 | 4  | 3 | 0 | 44 | 64  | 15549012 | 8.65E-01 | 1 |
| PDZD2    | 440207  | 557  | 6   | 7025660 | 2171956 | 0 | 19 | 5 | 0 | 15 | 21  | 7322564  | 8.65E-01 | 1 |
| SH3GLB2  | 1517799 | 203  | 29  | 1017092 | 294412  | 0 | 1  | 2 | 0 | 50 | 43  | 19078752 | 8.65E-01 | 1 |
| GARS     | 504898  | 433  | 42  | 1915992 | 523320  | 0 | 4  | 1 | 0 | 17 | 25  | 10088328 | 8.65E-01 | 1 |
| MCTP2    | 46228   | 457  | -17 | 2371316 | 615880  | 0 | 6  | 4 | 0 | 29 | 30  | 9156676  | 8.65E-01 | 1 |
| C11orf54 | 290677  | 527  | 0   | 702032  | 180136  | 0 | 1  | 0 | 0 | 50 | 59  | 19845576 | 8.65E-01 | 1 |
| TNNT3    | 827096  | 481  | 53  | 817376  | 168388  | 0 | 1  | 1 | 0 | 50 | 76  | 25042464 | 8.65E-01 | 1 |
| CLIP2    | 938020  | 179  | 51  | 2619804 | 803136  | 0 | 7  | 2 | 0 | 26 | 34  | 11429736 | 8.65E-01 | 1 |
| FASLG    | 116331  | 506  | 7   | 708440  | 207904  | 0 | 1  | 1 | 0 | 50 | 69  | 21465732 | 8.65E-01 | 1 |
| NR4A1    | 468067  | 234  | 41  | 1465652 | 479176  | 0 | 1  | 0 | 0 | 40 | 21  | 13369580 | 8.65E-01 | 1 |
| DOK3     | 1120311 | 347  | 41  | 1481316 | 508368  | 0 | 1  | 0 | 0 | 13 | 16  | 5959084  | 8.65E-01 | 1 |
| ZNF446   | 2179183 | 270  | -4  | 1119264 | 351372  | 0 | 2  | 1 | 0 | 50 | 76  | 25634848 | 8.65E-01 | 1 |
| TBCD     | 651944  | 456  | 14  | 3098624 | 886084  | 0 | 10 | 6 | 0 | 8  | 13  | 3523688  | 8.65E-01 | 1 |
| MAN1A1   | 105366  | 702  | 6   | 1676760 | 465648  | 0 | 3  | 0 | 0 | 21 | 23  | 10942016 | 8.65E-01 | 1 |
| IFT122   | 848687  | 163  | 58  | 3388408 | 887864  | 0 | 7  | 2 | 0 | 50 | 62  | 20910016 | 8.65E-01 | 1 |
| CARD10   | 985853  | 176  | 51  | 2581000 | 812036  | 0 | 5  | 3 | 0 | 50 | 63  | 19932440 | 8.66E-01 | 1 |
| MAEA     | 938287  | 391  | 37  | 1028484 | 279816  | 0 | 2  | 1 | 0 | 50 | 57  | 18627700 | 8.66E-01 | 1 |
| RASL12   | 688371  | 189  | 44  | 669636  | 202920  | 0 | 1  | 1 | 0 | 50 | 72  | 23489592 | 8.66E-01 | 1 |
| DYM      | 241451  | 414  | 57  | 1749028 | 466004  | 0 | 4  | 3 | 0 | 50 | 61  | 21908596 | 8.66E-01 | 1 |
| XKR3     | 106864  | 720  | -97 | 1178004 | 308652  | 0 | 3  | 1 | 0 | 50 | 87  | 22203720 | 8.66E-01 | 1 |
| LSR      | 767246  | 472  | 7   | 1626564 | 495552  | 0 | 5  | 5 | 0 | 13 | 13  | 4190476  | 8.66E-01 | 1 |
| DHX8     | 1124329 | 147  | 20  | 3139208 | 868996  | 0 | 11 | 1 | 0 | 0  | 1   | 868996   | 8.66E-01 | 1 |
| PITPNM1  | 1392213 | 215  | 53  | 3122120 | 965116  | 0 | 7  | 1 | 0 | 11 | 7   | 3262740  | 8.66E-01 | 1 |
| CEP120   | 173569  | 467  | 12  | 2574592 | 673196  | 0 | 4  | 0 | 0 | 3  | 3   | 2175516  | 8.66E-01 | 1 |
| GZMB     | 853527  | 610  | -12 | 635816  | 178000  | 0 | 2  | 1 | 0 | 50 | 132 | 24594616 | 8.66E-01 | 1 |
| BRD7     | 303953  | 520  | 14  | 1745112 | 417588  | 0 | 6  | 3 | 0 | 4  | 10  | 2039168  | 8.66E-01 | 1 |
| NAT6     | 843769  | 206  | 51  | 730868  | 265576  | 0 | 1  | 1 | 0 | 50 | 68  | 20472848 | 8.66E-01 | 1 |
| RILPL1   | 1039355 | 424  | 49  | 1035960 | 284088  | 0 | 2  | 0 | 0 | 50 | 81  | 25992984 | 8.66E-01 | 1 |
| RTAP15-  | 14979   | 1035 | -68 | 346744  | 97544   | 0 | 1  | 1 | 0 | 40 | 56  | 9651872  | 8.66E-01 | 1 |
| ZNF211   | 532349  | 849  | -37 | 1492708 | 372020  | 0 | 4  | 0 | 0 | 22 | 27  | 8358168  | 8.66E-01 | 1 |
| KCNN4    | 452493  | 192  | -2  | 1060524 | 344964  | 0 | 3  | 3 | 0 | 8  | 13  | 3599872  | 8.66E-01 | 1 |
| CYSLTR2  | 404943  | 430  | 46  | 859740  | 254184  | 0 | 1  | 1 | 0 | 50 | 55  | 23510596 | 8.66E-01 | 1 |
| SLC39A5  | 2878071 | 171  | 46  | 1301180 | 477040  | 0 | 2  | 1 | 0 | 13 | 15  | 6175532  | 8.67E-01 | 1 |

|          |         |      |     |         |         |   |    |   |   |    |    |          |          |   |
|----------|---------|------|-----|---------|---------|---|----|---|---|----|----|----------|----------|---|
| HMGXB4   | 359646  | 425  | -49 | 1545040 | 426488  | 0 | 5  | 1 | 0 | 30 | 51 | 13034584 | 8.67E-01 | 1 |
| TPD52    | 211901  | 353  | 43  | 668212  | 178712  | 0 | 1  | 0 | 0 | 50 | 58 | 18686440 | 8.67E-01 | 1 |
| GDAP2    | 204311  | 596  | -6  | 1336780 | 360272  | 0 | 2  | 2 | 0 | 50 | 56 | 22798952 | 8.67E-01 | 1 |
| PTK7     | 1273888 | 301  | 39  | 2727316 | 785336  | 0 | 7  | 1 | 0 | 17 | 40 | 12635508 | 8.67E-01 | 1 |
| RNF113A  | 772178  | NaN  | 38  | 873268  | 231044  | 0 | 1  | 0 | 0 | 50 | 59 | 22592472 | 8.67E-01 | 1 |
| PI16     | 832054  | 220  | 41  | 1144896 | 367392  | 0 | 2  | 1 | 0 | 50 | 65 | 22074136 | 8.67E-01 | 1 |
| CARNS1   | 1269888 | 177  | 51  | 2276620 | 808832  | 0 | 4  | 1 | 0 | 50 | 45 | 20698908 | 8.67E-01 | 1 |
| ADAMTSL  | 2122824 | 221  | 35  | 1189040 | 365968  | 0 | 2  | 0 | 0 | 27 | 22 | 8391632  | 8.67E-01 | 1 |
| CUL4A    | 787509  | 214  | 46  | 2020300 | 498044  | 0 | 3  | 2 | 0 | 31 | 37 | 13246404 | 8.67E-01 | 1 |
| PRICKLE3 | 724395  | NaN  | 44  | 1552516 | 457460  | 0 | 2  | 0 | 0 | 32 | 28 | 13371716 | 8.67E-01 | 1 |
| OR1A2    | 506514  | 628  | 0   | 769316  | 223924  | 0 | 1  | 1 | 0 | 50 | 74 | 22952032 | 8.67E-01 | 1 |
| C19orf26 | 2214581 | 234  | 29  | 1099328 | 370240  | 0 | 2  | 1 | 0 | 50 | 68 | 20485664 | 8.67E-01 | 1 |
| GLYATL2  | 285727  | 673  | -11 | 786760  | 179780  | 0 | 3  | 2 | 0 | 7  | 8  | 1745112  | 8.68E-01 | 1 |
| ENTPD6   | 605543  | 305  | -18 | 1262020 | 357068  | 0 | 2  | 0 | 0 | 12 | 23 | 6007144  | 8.68E-01 | 1 |
| ASPG     | 622747  | 468  | 20  | 1449276 | 477396  | 0 | 3  | 1 | 0 | 50 | 61 | 20058108 | 8.68E-01 | 1 |
| RLBP1    | 649712  | 400  | 25  | 827344  | 221432  | 0 | 5  | 3 | 0 | 2  | 8  | 1368108  | 8.68E-01 | 1 |
| ANKRD16  | 649866  | 305  | 28  | 930228  | 261660  | 0 | 1  | 0 | 0 | 50 | 54 | 23924980 | 8.68E-01 | 1 |
| ZNF440   | 739660  | 633  | -2  | 1540056 | 382344  | 0 | 6  | 3 | 0 | 4  | 6  | 1213960  | 8.68E-01 | 1 |
| PLEKHA2  | 487952  | 201  | 38  | 1105380 | 306516  | 0 | 2  | 0 | 0 | 25 | 22 | 7699568  | 8.68E-01 | 1 |
| RGPD4    | NaN     | NaN  | NaN | 4535084 | 1196872 | 0 | 16 | 1 | 0 | 7  | 15 | 4885032  | 8.68E-01 | 1 |
| DLGAP1   | 368461  | 215  | 24  | 2515140 | 717696  | 0 | 7  | 3 | 0 | 6  | 8  | 2537568  | 8.68E-01 | 1 |
| RNF145   | 123474  | 225  | 42  | 1776796 | 485228  | 0 | 4  | 4 | 0 | 29 | 49 | 12154552 | 8.68E-01 | 1 |
| CLPX     | 678641  | 189  | 61  | 1630480 | 458528  | 0 | 4  | 1 | 0 | 8  | 6  | 2592748  | 8.68E-01 | 1 |
| FAM46C   | 344088  | 557  | 16  | 981492  | 278748  | 0 | 1  | 0 | 0 | 50 | 55 | 25972692 | 8.68E-01 | 1 |
| RP1      | 148553  | 735  | -8  | 5478484 | 1445360 | 0 | 16 | 3 | 0 | 8  | 11 | 4692792  | 8.68E-01 | 1 |
| DISP1    | 236778  | 210  | 5   | 3879332 | 1038808 | 0 | 10 | 5 | 0 | 50 | 59 | 21006848 | 8.68E-01 | 1 |
| TBRG4    | 1070050 | 291  | 53  | 1576368 | 491280  | 0 | 6  | 0 | 0 | 10 | 18 | 4766484  | 8.68E-01 | 1 |
| TTC30B   | 380902  | 434  | 27  | 1668928 | 467072  | 0 | 5  | 2 | 0 | 5  | 7  | 2744404  | 8.68E-01 | 1 |
| ENOX2    | 138723  | NaN  | 23  | 1617664 | 395516  | 0 | 2  | 0 | 0 | 50 | 36 | 17510572 | 8.68E-01 | 1 |
| CNTN4    | 52413   | 1215 | -22 | 2657184 | 727308  | 0 | 10 | 5 | 0 | 19 | 30 | 7174468  | 8.68E-01 | 1 |
| TCIRG1   | 1168866 | 251  | 63  | 2094704 | 651124  | 0 | 4  | 1 | 0 | 16 | 16 | 6547552  | 8.68E-01 | 1 |
| CAMK2A   | 978175  | 220  | 47  | 1302604 | 344252  | 0 | 2  | 2 | 0 | 36 | 38 | 15465352 | 8.68E-01 | 1 |
| CTR9     | 794670  | 261  | 20  | 3091148 | 772876  | 0 | 6  | 0 | 0 | 4  | 2  | 2081888  | 8.68E-01 | 1 |

|          |         |      |     |         |         |   |   |   |   |    |     |          |          |   |
|----------|---------|------|-----|---------|---------|---|---|---|---|----|-----|----------|----------|---|
| OR4D11   | 430021  | 507  | -1  | 757212  | 242436  | 0 | 3 | 3 | 0 | 8  | 24  | 4424012  | 8.68E-01 | 1 |
| SQLE     | 518053  | 572  | 19  | 1379144 | 398008  | 0 | 4 | 1 | 0 | 3  | 4   | 1311504  | 8.68E-01 | 1 |
| EPHB4    | 1339207 | 433  | 48  | 2465656 | 768248  | 0 | 7 | 0 | 0 | 4  | 7   | 3076552  | 8.68E-01 | 1 |
| NMBR     | 152447  | 513  | -28 | 975440  | 288004  | 0 | 3 | 1 | 0 | 50 | 123 | 25680772 | 8.68E-01 | 1 |
| GAPVD1   | 954577  | 218  | 46  | 3834120 | 1044504 | 0 | 7 | 1 | 0 | 10 | 6   | 4446084  | 8.68E-01 | 1 |
| PRDX2    | 1937827 | 226  | 32  | 652192  | 188324  | 0 | 1 | 1 | 0 | 50 | 71  | 21091932 | 8.68E-01 | 1 |
| PISD     | 538801  | 268  | 47  | 950520  | 279816  | 0 | 1 | 1 | 0 | 33 | 30  | 12881860 | 8.69E-01 | 1 |
| OR5D18   | 4183    | 1091 | -36 | 767536  | 237452  | 0 | 6 | 4 | 0 | 4  | 12  | 1169816  | 8.69E-01 | 1 |
| HIST1H1T | 398813  | 636  | 53  | 510148  | 160556  | 0 | 1 | 2 | 0 | 33 | 36  | 8882912  | 8.69E-01 | 1 |
| LRRC10   | 499701  | 394  | 14  | 675688  | 215024  | 0 | 1 | 1 | 0 | 50 | 62  | 19775088 | 8.69E-01 | 1 |
| WISP3    | 159324  | 296  | 16  | 966184  | 248132  | 0 | 1 | 0 | 0 | 50 | 38  | 15373504 | 8.69E-01 | 1 |
| TMEM47   | 7188    | NaN  | -16 | 453544  | 138128  | 0 | 1 | 1 | 0 | 39 | 88  | 19402000 | 8.69E-01 | 1 |
| SLC41A1  | 717622  | 377  | 37  | 1279108 | 406196  | 0 | 2 | 1 | 0 | 50 | 68  | 25178456 | 8.69E-01 | 1 |
| XPO6     | 879658  | 233  | 39  | 2903892 | 802068  | 0 | 8 | 3 | 0 | 42 | 47  | 17338624 | 8.69E-01 | 1 |
| DDX42    | 1259976 | 346  | 12  | 2427920 | 653260  | 0 | 8 | 0 | 0 | 10 | 13  | 4595960  | 8.69E-01 | 1 |
| DAOA     | 13092   | 1235 | -28 | 527236  | 103952  | 0 | 1 | 0 | 0 | 50 | 101 | 22823516 | 8.69E-01 | 1 |
| SCFD1    | 386053  | 583  | 2   | 1735856 | 428980  | 0 | 5 | 0 | 0 | 30 | 50  | 16047768 | 8.69E-01 | 1 |
| ADH1C    | 332785  | 854  | 8   | 963336  | 277680  | 0 | 2 | 0 | 0 | 50 | 70  | 20070924 | 8.69E-01 | 1 |
| AKT1     | 711772  | 247  | 36  | 1269140 | 327520  | 0 | 3 | 2 | 0 | 50 | 66  | 18830620 | 8.69E-01 | 1 |
| CDC5L    | 958127  | 443  | 34  | 2092212 | 544680  | 0 | 4 | 1 | 0 | 50 | 47  | 18885800 | 8.69E-01 | 1 |
| DERL3    | 637355  | 196  | 52  | 692064  | 209328  | 0 | 1 | 1 | 0 | 50 | 63  | 20521620 | 8.69E-01 | 1 |
| FAM83B   | 25624   | 495  | -15 | 2562844 | 698828  | 0 | 6 | 0 | 0 | 1  | 0   | 765044   | 8.69E-01 | 1 |
| RCL1     | 238716  | 573  | 26  | 949452  | 283020  | 0 | 1 | 0 | 0 | 50 | 50  | 23431564 | 8.69E-01 | 1 |
| NOS2     | 474206  | 541  | -22 | 2985060 | 823428  | 0 | 9 | 3 | 0 | 17 | 23  | 6725908  | 8.69E-01 | 1 |
| TBC1D2B  | 435470  | 232  | 54  | 2469572 | 670348  | 0 | 4 | 1 | 0 | 50 | 51  | 18436528 | 8.70E-01 | 1 |
| DYNC1I2  | 354433  | 344  | 33  | 1686016 | 433964  | 0 | 3 | 0 | 0 | 35 | 29  | 13090832 | 8.70E-01 | 1 |
| PADI1    | 524388  | 182  | 42  | 1719124 | 474548  | 0 | 6 | 4 | 0 | 5  | 7   | 2373808  | 8.70E-01 | 1 |
| CSRP3    | 132848  | 504  | 16  | 513708  | 132432  | 0 | 1 | 1 | 0 | 9  | 12  | 3421516  | 8.70E-01 | 1 |
| DGUOK    | 1036341 | 284  | 45  | 723392  | 195088  | 0 | 1 | 0 | 0 | 50 | 73  | 24714944 | 8.70E-01 | 1 |
| MTX3     | 319253  | 795  | 31  | 815596  | 223568  | 0 | 1 | 1 | 0 | 16 | 12  | 5360648  | 8.70E-01 | 1 |
| ENC1     | 293932  | 567  | 26  | 1473128 | 425776  | 0 | 3 | 1 | 0 | 50 | 63  | 24367132 | 8.70E-01 | 1 |
| PNMA3    | 265470  | NaN  | 16  | 1134216 | 352440  | 0 | 1 | 0 | 0 | 50 | 50  | 25261048 | 8.70E-01 | 1 |
| TAF5L    | 299238  | 340  | 15  | 1487724 | 423996  | 0 | 2 | 1 | 0 | 50 | 56  | 23073428 | 8.70E-01 | 1 |

|          |         |      |     |         |         |   |    |   |   |    |     |          |          |   |
|----------|---------|------|-----|---------|---------|---|----|---|---|----|-----|----------|----------|---|
| NETO1    | 32720   | 916  | -26 | 1432544 | 359560  | 0 | 3  | 4 | 0 | 15 | 25  | 4648292  | 8.70E-01 | 1 |
| KRTAP1-5 | 977588  | 404  | 10  | 448560  | 114276  | 0 | 1  | 1 | 0 | 50 | 68  | 14276668 | 8.70E-01 | 1 |
| TMEM14C  | 263716  | 468  | 14  | 303312  | 84372   | 0 | 1  | 1 | 0 | 4  | 6   | 1045928  | 8.70E-01 | 1 |
| DGKI     | 196508  | 861  | -7  | 2792108 | 765400  | 0 | 7  | 1 | 0 | 7  | 8   | 3880756  | 8.70E-01 | 1 |
| PUS7L    | 132735  | 558  | -16 | 1830196 | 453188  | 0 | 4  | 2 | 0 | 7  | 6   | 3077976  | 8.70E-01 | 1 |
| LRRC32   | 269123  | 379  | 26  | 1577792 | 555004  | 0 | 3  | 0 | 0 | 50 | 54  | 22933164 | 8.70E-01 | 1 |
| STRN4    | 1166804 | 224  | 36  | 1945896 | 572448  | 0 | 4  | 1 | 0 | 50 | 50  | 18884020 | 8.70E-01 | 1 |
| RPP30    | 103854  | 510  | 4   | 864012  | 240300  | 0 | 1  | 0 | 0 | 25 | 21  | 8382376  | 8.70E-01 | 1 |
| PTCHD1   | 397667  | NaN  | -2  | 2216812 | 642224  | 0 | 7  | 2 | 0 | 23 | 39  | 11684276 | 8.71E-01 | 1 |
| NNT      | 439246  | 597  | 0   | 2736216 | 836244  | 0 | 7  | 2 | 0 | 50 | 66  | 22769760 | 8.71E-01 | 1 |
| ELK1     | 772893  | NaN  | 41  | 1039876 | 356000  | 0 | 1  | 1 | 0 | 50 | 65  | 24254280 | 8.71E-01 | 1 |
| STARD13  | 157153  | 583  | 41  | 2956936 | 826988  | 0 | 5  | 1 | 0 | 9  | 5   | 3754376  | 8.71E-01 | 1 |
| RSPH3    | 514213  | 348  | 42  | 1414744 | 412604  | 0 | 2  | 1 | 0 | 38 | 37  | 15269908 | 8.71E-01 | 1 |
| TEX10    | 246976  | 476  | 12  | 2387336 | 665008  | 0 | 3  | 0 | 0 | 1  | 0   | 1193312  | 8.71E-01 | 1 |
| RSBN1    | 318105  | 406  | 18  | 2019944 | 580636  | 0 | 4  | 1 | 0 | 22 | 28  | 11935968 | 8.71E-01 | 1 |
| RABGEF1  | 539697  | 302  | 55  | 1294060 | 316484  | 0 | 3  | 3 | 0 | 14 | 14  | 4379868  | 8.71E-01 | 1 |
| TNS3     | 192490  | 488  | 16  | 3658968 | 1085088 | 0 | 13 | 3 | 0 | 6  | 10  | 3369896  | 8.71E-01 | 1 |
| FBXW12   | 1401411 | 263  | 32  | 1252764 | 321468  | 0 | 1  | 1 | 0 | 50 | 79  | 21907884 | 8.71E-01 | 1 |
| HAUS2    | 534369  | 269  | 40  | 625848  | 155928  | 0 | 1  | 0 | 0 | 22 | 24  | 7399816  | 8.71E-01 | 1 |
| IGSF5    | 285788  | 762  | -70 | 1051980 | 290496  | 0 | 3  | 1 | 0 | 50 | 96  | 22399520 | 8.71E-01 | 1 |
| USP5     | 2822601 | 232  | 32  | 2229984 | 607692  | 0 | 3  | 2 | 0 | 50 | 62  | 20662240 | 8.71E-01 | 1 |
| LUC7L3   | 1462233 | 148  | 16  | 1151304 | 278748  | 0 | 3  | 0 | 0 | 24 | 42  | 11846256 | 8.71E-01 | 1 |
| WSCD2    | 451405  | 644  | 29  | 1440376 | 402992  | 0 | 2  | 2 | 0 | 30 | 33  | 13631240 | 8.71E-01 | 1 |
| MT1A     | 653985  | 187  | 28  | 174796  | 34532   | 0 | 1  | 1 | 0 | 6  | 1   | 255608   | 8.71E-01 | 1 |
| ETV3L    | 934232  | 423  | 32  | 902104  | 274832  | 0 | 1  | 0 | 0 | 50 | 48  | 19649776 | 8.71E-01 | 1 |
| SP110    | 473233  | 643  | 31  | 1964764 | 489500  | 0 | 3  | 4 | 0 | 14 | 14  | 3886096  | 8.71E-01 | 1 |
| TMX3     | 70753   | 920  | -24 | 1228912 | 292988  | 0 | 2  | 0 | 0 | 39 | 65  | 16515908 | 8.71E-01 | 1 |
| STEAP4   | 155853  | 454  | -6  | 1148812 | 342116  | 0 | 2  | 1 | 0 | 50 | 55  | 19200504 | 8.71E-01 | 1 |
| AGAP5    | NaN     | NaN  | NaN | 1747248 | 485940  | 0 | 4  | 1 | 0 | 50 | 117 | 40131524 | 8.71E-01 | 1 |
| KLHL1    | 4513    | 1341 | -27 | 1916704 | 525812  | 0 | 13 | 5 | 0 | 11 | 25  | 3528672  | 8.71E-01 | 1 |
| TMEM68   | 319097  | 538  | -3  | 672128  | 171592  | 0 | 1  | 1 | 0 | 50 | 54  | 17729868 | 8.71E-01 | 1 |
| DCX      | 131531  | NaN  | 13  | 1147388 | 310432  | 0 | 2  | 1 | 0 | 42 | 49  | 17013596 | 8.72E-01 | 1 |
| TEX13B   | 184382  | NaN  | 40  | 779996  | 231400  | 0 | 1  | 1 | 0 | 50 | 69  | 19292352 | 8.72E-01 | 1 |

|         |         |      |     |         |         |   |    |   |   |    |    |          |          |   |
|---------|---------|------|-----|---------|---------|---|----|---|---|----|----|----------|----------|---|
| ENSA    | 1543587 | 149  | 37  | 522964  | 132788  | 0 | 1  | 0 | 0 | 17 | 33 | 8290528  | 8.72E-01 | 1 |
| SIRT6   | 2256881 | 244  | 42  | 886084  | 286580  | 0 | 1  | 0 | 0 | 50 | 51 | 21490652 | 8.72E-01 | 1 |
| OR2AG1  | 427462  | 681  | 8   | 772520  | 247420  | 0 | 1  | 0 | 0 | 50 | 71 | 18227912 | 8.72E-01 | 1 |
| CEP72   | 683895  | 411  | 28  | 1661808 | 463512  | 0 | 3  | 0 | 0 | 8  | 7  | 3458540  | 8.72E-01 | 1 |
| OR6C4   | 1393447 | 546  | -13 | 763264  | 227840  | 0 | 1  | 0 | 0 | 27 | 23 | 8982592  | 8.72E-01 | 1 |
| TMTC3   | 149643  | 429  | -9  | 2362416 | 624780  | 0 | 6  | 0 | 0 | 0  | 0  | 624780   | 8.72E-01 | 1 |
| AREG    | 172071  | NaN  | 10  | 1322896 | 341048  | 0 | 1  | 0 | 0 | 29 | 24 | 15581408 | 8.72E-01 | 1 |
| PEG10   | 393749  | 462  | 4   | 2498408 | 24208   | 0 | 2  | 0 | 0 | 50 | 52 | 19426208 | 8.72E-01 | 1 |
| OXTR    | 158952  | 534  | 3   | 944112  | 309720  | 0 | 1  | 1 | 0 | 50 | 40 | 17926024 | 8.72E-01 | 1 |
| SLC2A4  | 1782958 | 316  | 21  | 1256324 | 420436  | 0 | 3  | 2 | 0 | 39 | 39 | 14081580 | 8.72E-01 | 1 |
| FOXG1   | 52980   | 1173 | -46 | 1191888 | 378072  | 0 | 4  | 3 | 0 | 10 | 25 | 6182296  | 8.72E-01 | 1 |
| RAB40A  | 458015  | NaN  | 22  | 687080  | 207904  | 0 | 1  | 0 | 0 | 50 | 57 | 19034964 | 8.72E-01 | 1 |
| GOLGA7B | 543507  | 369  | 12  | 512640  | 104664  | 0 | 1  | 1 | 0 | 10 | 20 | 5305468  | 8.72E-01 | 1 |
| HEYL    | 976856  | 358  | 33  | 801712  | 271628  | 0 | 1  | 0 | 0 | 37 | 40 | 15215084 | 8.72E-01 | 1 |
| ASCC1   | 761166  | 140  | 40  | 952300  | 233180  | 0 | 1  | 0 | 0 | 50 | 52 | 21413756 | 8.72E-01 | 1 |
| SEC24A  | 899027  | 175  | 40  | 2794600 | 804560  | 0 | 6  | 6 | 0 | 50 | 70 | 22324404 | 8.72E-01 | 1 |
| ITGB7   | 1703142 | 191  | 52  | 2021012 | 598792  | 0 | 3  | 0 | 0 | 7  | 10 | 4059824  | 8.72E-01 | 1 |
| TECPR2  | 1666122 | 191  | 37  | 3592040 | 1027060 | 0 | 9  | 5 | 0 | 15 | 29 | 8383444  | 8.72E-01 | 1 |
| ATXN7L2 | 1056159 | 272  | 37  | 1801360 | 559988  | 0 | 5  | 3 | 0 | 50 | 61 | 17976932 | 8.72E-01 | 1 |
| MESP2   | 934542  | 212  | 37  | 950164  | 329300  | 0 | 1  | 1 | 0 | 50 | 65 | 20979792 | 8.73E-01 | 1 |
| RCBTB1  | 430735  | 338  | 67  | 1372380 | 379140  | 0 | 2  | 1 | 0 | 50 | 49 | 19642300 | 8.73E-01 | 1 |
| CBLL1   | 513169  | 515  | 28  | 1244220 | 353508  | 0 | 3  | 2 | 0 | 50 | 63 | 20041732 | 8.73E-01 | 1 |
| CPAMD8  | 947295  | 386  | 29  | 4890728 | 1479892 | 0 | 10 | 6 | 0 | 50 | 43 | 18675404 | 8.73E-01 | 1 |
| DHRS12  | 252271  | 384  | 33  | 859384  | 225704  | 0 | 1  | 1 | 0 | 50 | 47 | 18986904 | 8.73E-01 | 1 |
| PFDN5   | 1677275 | 191  | 49  | 418656  | 100392  | 0 | 1  | 1 | 0 | 5  | 17 | 3210408  | 8.73E-01 | 1 |
| CDC27   | 955548  | 395  | 18  | 2170176 | 569244  | 0 | 4  | 1 | 0 | 3  | 3  | 2097552  | 8.73E-01 | 1 |
| YIPF2   | 2009333 | 193  | 41  | 803136  | 250980  | 0 | 2  | 2 | 0 | 8  | 15 | 3918848  | 8.73E-01 | 1 |
| RHBG    | 2199280 | 201  | 27  | 1148456 | 363832  | 0 | 3  | 1 | 0 | 50 | 86 | 24636980 | 8.73E-01 | 1 |
| RPIA    | 103964  | 309  | 18  | 806696  | 229264  | 0 | 1  | 1 | 0 | 50 | 49 | 19268856 | 8.73E-01 | 1 |
| LHX2    | 306688  | 342  | 19  | 1018516 | 302600  | 0 | 2  | 2 | 0 | 12 | 14 | 4791760  | 8.73E-01 | 1 |
| FAM169A | 424900  | 581  | 31  | 1743332 | 457816  | 0 | 4  | 0 | 0 | 14 | 13 | 4964776  | 8.73E-01 | 1 |
| FBXW8   | 208959  | 359  | 16  | 1526172 | 437880  | 0 | 3  | 0 | 0 | 7  | 7  | 2310440  | 8.73E-01 | 1 |
| SMAD2   | 108087  | 185  | 42  | 1220012 | 322180  | 0 | 3  | 0 | 0 | 50 | 76 | 20349672 | 8.73E-01 | 1 |

|         |         |     |     |         |         |   |    |   |   |    |    |          |          |   |
|---------|---------|-----|-----|---------|---------|---|----|---|---|----|----|----------|----------|---|
| UHRF1   | 789691  | 248 | 32  | 2070140 | 578500  | 0 | 2  | 1 | 0 | 50 | 55 | 20315852 | 8.73E-01 | 1 |
| DTNA    | 116061  | 552 | -20 | 2029556 | 541120  | 0 | 5  | 0 | 0 | 8  | 14 | 5508388  | 8.73E-01 | 1 |
| OCIAD1  | 257328  | 372 | 63  | 699184  | 163760  | 0 | 1  | 0 | 0 | 50 | 65 | 20895420 | 8.73E-01 | 1 |
| MRGPRF  | 557282  | 416 | 51  | 840160  | 274832  | 0 | 2  | 2 | 0 | 9  | 18 | 4515148  | 8.73E-01 | 1 |
| ZNF214  | 418263  | 881 | -4  | 1585980 | 367392  | 0 | 4  | 0 | 0 | 49 | 69 | 19482456 | 8.73E-01 | 1 |
| ZNF264  | 407201  | 924 | -63 | 1601644 | 423284  | 0 | 4  | 0 | 0 | 26 | 28 | 9636564  | 8.73E-01 | 1 |
| USP39   | 1158965 | 170 | 43  | 1470992 | 395872  | 0 | 3  | 0 | 0 | 8  | 11 | 3234616  | 8.73E-01 | 1 |
| ALDOC   | 1651143 | 225 | 31  | 926312  | 277324  | 0 | 1  | 1 | 0 | 50 | 69 | 21609556 | 8.73E-01 | 1 |
| PRPF40A | 285742  | 716 | 16  | 2499120 | 592740  | 0 | 6  | 0 | 0 | 9  | 8  | 4154164  | 8.73E-01 | 1 |
| ERCC8   | 199321  | 599 | 6   | 1053048 | 268068  | 0 | 1  | 1 | 0 | 50 | 40 | 20381000 | 8.73E-01 | 1 |
| UBN1    | 704578  | 195 | 26  | 2859392 | 849772  | 0 | 5  | 3 | 0 | 16 | 24 | 11753340 | 8.73E-01 | 1 |
| IL6ST   | 317374  | 438 | 51  | 2393744 | 614812  | 0 | 7  | 0 | 0 | 11 | 23 | 7600244  | 8.73E-01 | 1 |
| TCF3    | 2396187 | 262 | 31  | 1854404 | 572092  | 0 | 3  | 1 | 0 | 50 | 60 | 26523068 | 8.73E-01 | 1 |
| STXBP4  | 132396  | 845 | -50 | 1456752 | 386616  | 0 | 3  | 1 | 0 | 17 | 15 | 5742636  | 8.73E-01 | 1 |
| SAMD9L  | 362550  | 625 | 8   | 4048788 | 1033824 | 0 | 15 | 2 | 0 | 12 | 25 | 5903904  | 8.74E-01 | 1 |
| CHRNA4  | 1278630 | 332 | 62  | 1541124 | 492348  | 0 | 4  | 3 | 0 | 50 | 61 | 17105444 | 8.74E-01 | 1 |
| CPA5    | 422275  | 212 | 28  | 1182988 | 268424  | 0 | 3  | 1 | 0 | 9  | 9  | 2932372  | 8.74E-01 | 1 |
| UEVLD   | 630607  | 341 | 24  | 1236744 | 324672  | 0 | 1  | 1 | 0 | 50 | 40 | 23340072 | 8.74E-01 | 1 |
| SKA1    | 277376  | 392 | 52  | 681028  | 164828  | 0 | 1  | 2 | 0 | 11 | 19 | 6446448  | 8.74E-01 | 1 |
| NPNT    | 262174  | 361 | 7   | 1585980 | 433608  | 0 | 3  | 1 | 0 | 50 | 53 | 18278108 | 8.74E-01 | 1 |
| AFP     | 331900  | 594 | 3   | 1613392 | 402992  | 0 | 5  | 0 | 0 | 10 | 14 | 3999660  | 8.74E-01 | 1 |
| FBXO9   | 450160  | 386 | 26  | 1196160 | 293700  | 0 | 2  | 1 | 0 | 50 | 53 | 19531584 | 8.74E-01 | 1 |
| PLIN3   | 765978  | 187 | 52  | 1096480 | 327164  | 0 | 6  | 4 | 0 | 2  | 7  | 1252408  | 8.74E-01 | 1 |
| APCDD1  | 219220  | 604 | 2   | 1295484 | 371664  | 0 | 2  | 1 | 0 | 50 | 51 | 19400220 | 8.74E-01 | 1 |
| MTFR1   | 146207  | 407 | 16  | 952656  | 267000  | 0 | 3  | 2 | 0 | 5  | 11 | 2007840  | 8.74E-01 | 1 |
| LAMB4   | 487451  | 326 | 4   | 4590976 | 1195448 | 0 | 12 | 3 | 0 | 50 | 62 | 22591048 | 8.74E-01 | 1 |
| THSD7A  | 138176  | 906 | -11 | 4306888 | 1116416 | 0 | 12 | 3 | 0 | 9  | 15 | 4608420  | 8.74E-01 | 1 |
| DLGAP4  | 874457  | 360 | 46  | 2582068 | 771452  | 0 | 6  | 2 | 0 | 50 | 99 | 27581456 | 8.74E-01 | 1 |
| AOC2    | 1631295 | 190 | 28  | 1845860 | 594520  | 0 | 3  | 1 | 0 | 50 | 77 | 21382784 | 8.74E-01 | 1 |
| GRSF1   | 263233  | 553 | 29  | 1230692 | 351016  | 0 | 2  | 0 | 0 | 50 | 67 | 22623800 | 8.74E-01 | 1 |
| LACE1   | 346225  | 491 | 37  | 1267004 | 328588  | 0 | 2  | 1 | 0 | 50 | 50 | 18596016 | 8.74E-01 | 1 |
| TTC39C  | 292559  | 189 | 54  | 1528308 | 398364  | 0 | 3  | 0 | 0 | 50 | 60 | 20945616 | 8.74E-01 | 1 |
| TATDN3  | 331599  | 445 | 22  | 744752  | 199360  | 0 | 1  | 0 | 0 | 50 | 84 | 29810016 | 8.74E-01 | 1 |



|          |         |      |     |         |         |   |    |   |   |    |    |          |          |   |
|----------|---------|------|-----|---------|---------|---|----|---|---|----|----|----------|----------|---|
| STT3A    | 391073  | 595  | 23  | 1829128 | 505520  | 0 | 3  | 1 | 0 | 50 | 54 | 21894000 | 8.74E-01 | 1 |
| GSK3A    | 790787  | 299  | 37  | 1206128 | 387328  | 0 | 2  | 2 | 0 | 50 | 73 | 25484972 | 8.74E-01 | 1 |
| FJX1     | 629751  | 396  | -15 | 1022076 | 381276  | 0 | 1  | 1 | 0 | 50 | 49 | 19793600 | 8.74E-01 | 1 |
| R3HDML   | 813168  | 376  | 10  | 652192  | 178712  | 0 | 1  | 1 | 0 | 50 | 60 | 16040648 | 8.74E-01 | 1 |
| AMMECR1  | 157872  | NaN  | 34  | 833396  | 260236  | 0 | 1  | 0 | 0 | 20 | 26 | 10875444 | 8.74E-01 | 1 |
| KIAA0753 | 462930  | 285  | 10  | 2505528 | 672840  | 0 | 8  | 2 | 0 | 4  | 7  | 2323968  | 8.74E-01 | 1 |
| SLC35D3  | 177175  | 449  | 21  | 996800  | 343540  | 0 | 2  | 3 | 0 | 26 | 29 | 8897864  | 8.75E-01 | 1 |
| IFI35    | 1507064 | 201  | 26  | 728020  | 223568  | 0 | 1  | 0 | 0 | 50 | 50 | 17618084 | 8.75E-01 | 1 |
| KCNAB2   | 593369  | 271  | 22  | 977932  | 265220  | 0 | 1  | 2 | 0 | 20 | 18 | 8138160  | 8.75E-01 | 1 |
| ZNF524   | 1077402 | 254  | -10 | 633680  | 219652  | 0 | 1  | 1 | 0 | 50 | 67 | 17041008 | 8.75E-01 | 1 |
| SIX5     | 929036  | 203  | 43  | 1716276 | 663228  | 0 | 3  | 2 | 0 | 33 | 37 | 14234660 | 8.75E-01 | 1 |
| DRD4     | 1774224 | 236  | 57  | 991816  | 368816  | 0 | 1  | 0 | 0 | 4  | 3  | 2271636  | 8.75E-01 | 1 |
| CERK     | 404043  | 265  | -1  | 1398012 | 377004  | 0 | 2  | 0 | 0 | 50 | 62 | 24407004 | 8.75E-01 | 1 |
| DERL2    | 1145030 | 544  | 24  | 629408  | 167320  | 0 | 1  | 1 | 0 | 50 | 77 | 22011836 | 8.75E-01 | 1 |
| UQCRC1   | 1386275 | 212  | 37  | 1234964 | 359560  | 0 | 2  | 2 | 0 | 50 | 75 | 27156392 | 8.75E-01 | 1 |
| GOPC     | 189169  | 465  | 9   | 1187260 | 330368  | 0 | 2  | 2 | 0 | 50 | 65 | 22672572 | 8.75E-01 | 1 |
| PIGL     | 905220  | 163  | 0   | 656464  | 181916  | 0 | 1  | 1 | 0 | 50 | 54 | 16613452 | 8.75E-01 | 1 |
| PCSK2    | 536476  | 528  | -40 | 1640092 | 454256  | 0 | 5  | 3 | 0 | 50 | 63 | 17722036 | 8.75E-01 | 1 |
| USF1     | 689033  | 250  | 23  | 812036  | 227128  | 0 | 2  | 0 | 0 | 12 | 19 | 4867588  | 8.75E-01 | 1 |
| MMP25    | 1534969 | 234  | 46  | 1398724 | 443576  | 0 | 3  | 2 | 0 | 50 | 70 | 19650844 | 8.75E-01 | 1 |
| ZNF98    | 38548   | 1322 | -77 | 1491996 | 356712  | 0 | 5  | 1 | 0 | 2  | 1  | 702032   | 8.75E-01 | 1 |
| HPD      | 829168  | 195  | 44  | 1052692 | 270560  | 0 | 2  | 1 | 0 | 13 | 13 | 4295140  | 8.75E-01 | 1 |
| MYH7     | 1220544 | 456  | 29  | 5035620 | 1329660 | 0 | 16 | 5 | 0 | 5  | 12 | 3841240  | 8.75E-01 | 1 |
| SMS      | 92980   | NaN  | 23  | 975796  | 244928  | 0 | 1  | 0 | 0 | 13 | 8  | 4100052  | 8.75E-01 | 1 |
| MSX1     | 132550  | 558  | 37  | 724460  | 253828  | 0 | 1  | 0 | 0 | 50 | 62 | 20678972 | 8.75E-01 | 1 |
| C8orf58  | 757216  | 224  | 45  | 902460  | 295836  | 0 | 1  | 0 | 0 | 48 | 49 | 21352880 | 8.75E-01 | 1 |
| CSN2     | 9753    | 991  | -4  | 582416  | 172660  | 0 | 1  | 0 | 0 | 50 | 76 | 18672912 | 8.75E-01 | 1 |
| OR8J1    | 10293   | 963  | -36 | 770384  | 243148  | 0 | 1  | 2 | 0 | 5  | 2  | 1310080  | 8.75E-01 | 1 |
| PRSS36   | 1296884 | 351  | 35  | 2117488 | 687080  | 0 | 5  | 2 | 0 | 16 | 27 | 8122140  | 8.75E-01 | 1 |
| KRT71    | 1280474 | 464  | 36  | 1334644 | 380564  | 0 | 5  | 2 | 0 | 3  | 5  | 1590964  | 8.75E-01 | 1 |
| RPL3L    | 1756887 | 183  | 42  | 1048064 | 299752  | 0 | 2  | 1 | 0 | 50 | 63 | 19992604 | 8.76E-01 | 1 |
| AZI2     | 68916   | 925  | 9   | 1115704 | 266288  | 0 | 6  | 2 | 0 | 1  | 2  | 397652   | 8.76E-01 | 1 |
| AGFG1    | 194117  | 353  | 23  | 1510152 | 426132  | 0 | 1  | 0 | 0 | 24 | 31 | 10153832 | 8.76E-01 | 1 |

|          |         |     |     |         |         |   |    |   |   |    |     |          |          |   |
|----------|---------|-----|-----|---------|---------|---|----|---|---|----|-----|----------|----------|---|
| CIT      | 905544  | 436 | 24  | 5285888 | 1408336 | 0 | 19 | 6 | 0 | 50 | 79  | 25908612 | 8.76E-01 | 1 |
| TJP1     | 194015  | 515 | -46 | 4460324 | 1258816 | 0 | 8  | 2 | 0 | 0  | 2   | 1258816  | 8.76E-01 | 1 |
| TRAF7    | 2179404 | 224 | 39  | 1754724 | 480600  | 0 | 2  | 2 | 0 | 50 | 46  | 19527312 | 8.76E-01 | 1 |
| CYBRD1   | 486534  | 352 | 34  | 789964  | 142400  | 0 | 1  | 0 | 0 | 50 | 46  | 17563260 | 8.76E-01 | 1 |
| GUCA1C   | 90728   | 971 | -15 | 556072  | 131720  | 0 | 2  | 2 | 0 | 2  | 10  | 1882172  | 8.76E-01 | 1 |
| NRXN2    | 1897094 | 411 | 56  | 4432556 | 1430764 | 0 | 11 | 4 | 0 | 31 | 35  | 12682856 | 8.76E-01 | 1 |
| MYBPH    | 507603  | 453 | 31  | 1212536 | 363832  | 0 | 2  | 2 | 0 | 50 | 72  | 22933520 | 8.76E-01 | 1 |
| LECT1    | 288742  | 469 | 24  | 868996  | 229976  | 0 | 1  | 0 | 0 | 50 | 67  | 23526972 | 8.76E-01 | 1 |
| SLC30A10 | 623319  | 641 | -12 | 1195092 | 374868  | 0 | 2  | 0 | 0 | 29 | 39  | 14135336 | 8.76E-01 | 1 |
| ADPGK    | 1106545 | 526 | 43  | 1240304 | 379852  | 0 | 2  | 0 | 0 | 50 | 70  | 26051368 | 8.76E-01 | 1 |
| OTOP3    | 1045089 | 223 | 25  | 1459956 | 477396  | 0 | 3  | 1 | 0 | 50 | 66  | 19891500 | 8.76E-01 | 1 |
| MCM8     | 301031  | 346 | 13  | 2185128 | 586332  | 0 | 8  | 0 | 0 | 14 | 16  | 5157372  | 8.76E-01 | 1 |
| METTL2B  | 893183  | 199 | 45  | 997512  | 253116  | 0 | 2  | 1 | 0 | 29 | 50  | 14161324 | 8.76E-01 | 1 |
| CEBPA    | 355217  | 510 | -9  | 857248  | 292988  | 0 | 1  | 1 | 0 | 50 | 58  | 23777240 | 8.76E-01 | 1 |
| MICAL3   | 415161  | 288 | 11  | 5690660 | 1642228 | 0 | 6  | 0 | 0 | 2  | 1   | 2416528  | 8.76E-01 | 1 |
| GLI4     | 1657385 | 389 | 19  | 938772  | 281952  | 0 | 4  | 4 | 0 | 4  | 6   | 1374872  | 8.76E-01 | 1 |
| CCDC159  | 1385739 | 197 | 31  | 807408  | 194376  | 0 | 1  | 0 | 0 | 50 | 60  | 22230420 | 8.76E-01 | 1 |
| TMEM8C   | 1858670 | 315 | 39  | 566396  | 166252  | 0 | 1  | 2 | 0 | 14 | 26  | 5231420  | 8.76E-01 | 1 |
| CLU      | 346863  | 361 | 29  | 1306164 | 344964  | 0 | 1  | 0 | 0 | 24 | 18  | 11650812 | 8.77E-01 | 1 |
| OR14A16  | 164924  | 995 | -27 | 764332  | 228908  | 0 | 2  | 0 | 0 | 50 | 130 | 29092676 | 8.77E-01 | 1 |
| SYCE1    | 563924  | 525 | -10 | 981848  | 241012  | 0 | 2  | 2 | 0 | 42 | 51  | 14206180 | 8.77E-01 | 1 |
| MCHR1    | 726133  | 165 | 54  | 1026704 | 332860  | 0 | 3  | 2 | 0 | 50 | 90  | 19997588 | 8.77E-01 | 1 |
| KCNK7    | 3945819 | 202 | 45  | 808476  | 294768  | 0 | 1  | 2 | 0 | 19 | 25  | 9711324  | 8.77E-01 | 1 |
| OTUD6B   | 104917  | 935 | 1   | 850484  | 215380  | 0 | 1  | 0 | 0 | 50 | 66  | 21354660 | 8.77E-01 | 1 |
| CARD8    | 1052191 | 391 | 32  | 1404776 | 368104  | 0 | 3  | 0 | 0 | 41 | 37  | 11983316 | 8.77E-01 | 1 |
| ABCB7    | 183021  | NaN | -5  | 1935572 | 548596  | 0 | 3  | 0 | 0 | 50 | 48  | 19458960 | 8.77E-01 | 1 |
| ILVBL    | 703673  | 419 | 1   | 1580284 | 511928  | 0 | 2  | 2 | 0 | 50 | 38  | 17686080 | 8.77E-01 | 1 |
| PRPS2    | 208595  | NaN | 46  | 823784  | 233536  | 0 | 1  | 1 | 0 | 50 | 83  | 24786856 | 8.77E-01 | 1 |
| GJA1     | 60722   | 773 | -23 | 959776  | 271628  | 0 | 2  | 0 | 0 | 13 | 18  | 5367768  | 8.77E-01 | 1 |
| G6PC     | 1629499 | 190 | 23  | 909224  | 257032  | 0 | 2  | 1 | 0 | 50 | 91  | 23722772 | 8.77E-01 | 1 |
| NEO1     | 328878  | 705 | 14  | 3733016 | 1070848 | 0 | 10 | 2 | 0 | 15 | 19  | 7763648  | 8.77E-01 | 1 |
| HOOK2    | 1959466 | 226 | 29  | 1868288 | 532576  | 0 | 4  | 0 | 0 | 3  | 1   | 1302248  | 8.77E-01 | 1 |
| PHKG2    | 1632278 | 158 | 61  | 1077256 | 312212  | 0 | 2  | 1 | 0 | 47 | 62  | 18440088 | 8.77E-01 | 1 |

|          |         |     |     |         |         |   |    |   |   |    |     |          |          |   |
|----------|---------|-----|-----|---------|---------|---|----|---|---|----|-----|----------|----------|---|
| ARCNI    | 1359480 | 167 | 47  | 1321472 | 357424  | 0 | 4  | 1 | 0 | 11 | 21  | 5243524  | 8.77E-01 | 1 |
| LPGAT1   | 465080  | 281 | 13  | 973660  | 244928  | 0 | 2  | 1 | 0 | 13 | 29  | 8325060  | 8.77E-01 | 1 |
| SLC19A2  | 294526  | 487 | 16  | 1229980 | 386972  | 0 | 2  | 2 | 0 | 50 | 48  | 17944536 | 8.77E-01 | 1 |
| SCN8A    | 575393  | 464 | 27  | 5101124 | 1357072 | 0 | 10 | 4 | 0 | 50 | 56  | 23518428 | 8.77E-01 | 1 |
| ACRV1    | 564542  | 595 | 13  | 693132  | 171948  | 0 | 1  | 0 | 0 | 50 | 72  | 22698560 | 8.77E-01 | 1 |
| SRRM3    | 851224  | 195 | 50  | 1610544 | 541476  | 0 | 1  | 0 | 0 | 33 | 36  | 13007528 | 8.77E-01 | 1 |
| PLA2G6   | 1578246 | 197 | 69  | 2051272 | 602708  | 0 | 3  | 2 | 0 | 33 | 38  | 9574264  | 8.77E-01 | 1 |
| CITED2   | 187396  | 504 | 14  | 687792  | 184764  | 0 | 1  | 0 | 0 | 50 | 62  | 20256756 | 8.77E-01 | 1 |
| RXFP2    | 223402  | 693 | 5   | 1991464 | 502316  | 0 | 4  | 0 | 0 | 1  | 0   | 772876   | 8.77E-01 | 1 |
| NANP     | 547844  | 515 | -31 | 630120  | 174084  | 0 | 1  | 0 | 0 | 50 | 55  | 16283440 | 8.78E-01 | 1 |
| PTGER1   | 954144  | 204 | 43  | 925600  | 376292  | 0 | 1  | 0 | 0 | 22 | 20  | 9379532  | 8.78E-01 | 1 |
| SERPINF1 | 1447501 | 189 | 32  | 1058388 | 313992  | 0 | 2  | 1 | 0 | 44 | 62  | 19487440 | 8.78E-01 | 1 |
| CD79B    | 1455216 | 404 | 25  | 604844  | 158776  | 0 | 1  | 1 | 0 | 50 | 68  | 18709936 | 8.78E-01 | 1 |
| RAP1GAP2 | 518031  | 418 | 12  | 1923468 | 523320  | 0 | 3  | 1 | 0 | 3  | 3   | 1798512  | 8.78E-01 | 1 |
| BHMT     | 164477  | 578 | 36  | 1051980 | 281952  | 0 | 1  | 1 | 0 | 50 | 53  | 19761560 | 8.78E-01 | 1 |
| KLHL17   | 1911331 | 239 | 9   | 1600220 | 506944  | 0 | 7  | 3 | 0 | 5  | 9   | 2282672  | 8.78E-01 | 1 |
| LIX1L    | NaN     | NaN | NaN | 840516  | 265932  | 0 | 1  | 0 | 0 | 50 | 116 | 39911516 | 8.78E-01 | 1 |
| CYP4F3   | 852124  | 605 | 29  | 1346392 | 373088  | 0 | 2  | 0 | 0 | 6  | 7   | 2396236  | 8.78E-01 | 1 |
| NFYA     | 145501  | 611 | 37  | 894272  | 259168  | 0 | 1  | 1 | 0 | 50 | 56  | 20220800 | 8.78E-01 | 1 |
| ALKBH8   | 234842  | 643 | -2  | 1734076 | 443576  | 0 | 3  | 0 | 0 | 25 | 19  | 7791416  | 8.78E-01 | 1 |
| GPR137B  | 483624  | 632 | 8   | 1011396 | 297972  | 0 | 2  | 1 | 0 | 50 | 71  | 22022516 | 8.78E-01 | 1 |
| IRAK1    | 2355024 | NaN | 25  | 1779288 | 562836  | 0 | 2  | 0 | 0 | 2  | 3   | 2559640  | 8.78E-01 | 1 |
| FAM179A  | 471053  | 404 | 28  | 2547180 | 797796  | 0 | 7  | 0 | 0 | 1  | 3   | 1758284  | 8.78E-01 | 1 |
| ZCCHC11  | 663395  | 394 | 20  | 4297988 | 1099684 | 0 | 14 | 2 | 0 | 7  | 13  | 4336080  | 8.78E-01 | 1 |
| TAS2R19  | 365490  | 676 | -2  | 739056  | 221076  | 0 | 1  | 1 | 0 | 50 | 58  | 17850552 | 8.78E-01 | 1 |
| HSF2     | 140855  | 973 | -19 | 1415812 | 356000  | 0 | 4  | 2 | 0 | 50 | 87  | 22963780 | 8.78E-01 | 1 |
| AOC3     | 1629499 | 190 | 23  | 1873984 | 586688  | 0 | 5  | 0 | 0 | 2  | 2   | 1071204  | 8.78E-01 | 1 |
| GCM2     | 263829  | 483 | 14  | 1286584 | 357068  | 0 | 4  | 3 | 0 | 20 | 20  | 5316148  | 8.78E-01 | 1 |
| FOXH1    | 1899637 | 200 | 22  | 878964  | 302244  | 0 | 1  | 0 | 0 | 17 | 18  | 8072656  | 8.79E-01 | 1 |
| DEPDC7   | 415951  | 215 | 25  | 1379144 | 348880  | 0 | 2  | 0 | 0 | 10 | 9   | 3642948  | 8.79E-01 | 1 |
| CD2      | 697845  | 431 | 21  | 903884  | 243148  | 0 | 1  | 0 | 0 | 50 | 69  | 23474640 | 8.79E-01 | 1 |
| CD163L1  | 931883  | 567 | 13  | 3735508 | 1006412 | 0 | 12 | 7 | 0 | 13 | 23  | 5442884  | 8.79E-01 | 1 |
| PCDH12   | 696239  | 321 | 48  | 2892144 | 917412  | 0 | 7  | 4 | 0 | 50 | 50  | 19214032 | 8.79E-01 | 1 |

|          |         |      |     |         |         |   |    |   |   |    |     |          |          |   |
|----------|---------|------|-----|---------|---------|---|----|---|---|----|-----|----------|----------|---|
| CHML     | NaN     | NaN  | NaN | 1657536 | 447492  | 0 | 3  | 2 | 0 | 50 | 118 | 40093076 | 8.79E-01 | 1 |
| CCR1     | 211405  | 639  | 48  | 879676  | 265220  | 0 | 1  | 1 | 0 | 50 | 45  | 15842000 | 8.79E-01 | 1 |
| FCN1     | 237562  | 489  | 35  | 851196  | 232824  | 0 | 3  | 3 | 0 | 3  | 4   | 1205060  | 8.79E-01 | 1 |
| MAF      | 10920   | 1003 | -30 | 986476  | 314348  | 0 | 3  | 0 | 0 | 8  | 19  | 3368116  | 8.79E-01 | 1 |
| DEACAM1  | 393294  | 583  | 17  | 1008192 | 287292  | 0 | 1  | 1 | 0 | 13 | 19  | 6561080  | 8.79E-01 | 1 |
| DEF8     | 1056657 | 221  | 35  | 1394808 | 383412  | 0 | 4  | 3 | 0 | 20 | 22  | 5927400  | 8.79E-01 | 1 |
| ZNF282   | 639444  | 254  | 30  | 1689932 | 493060  | 0 | 3  | 1 | 0 | 34 | 48  | 13028532 | 8.79E-01 | 1 |
| PTER     | 104989  | 791  | -7  | 888576  | 249912  | 0 | 1  | 0 | 0 | 10 | 22  | 8211852  | 8.79E-01 | 1 |
| CHST13   | 289633  | 508  | 52  | 813460  | 290852  | 0 | 1  | 2 | 0 | 20 | 25  | 7817404  | 8.79E-01 | 1 |
| PSMC4    | 1335888 | 522  | 35  | 1092564 | 294768  | 0 | 2  | 0 | 0 | 50 | 92  | 28057784 | 8.79E-01 | 1 |
| PIK3R4   | 198723  | 430  | 17  | 3488800 | 946604  | 0 | 8  | 4 | 0 | 50 | 56  | 19741624 | 8.79E-01 | 1 |
| PDIA2    | 1340678 | 205  | 43  | 1325388 | 406908  | 0 | 2  | 1 | 0 | 50 | 57  | 21858756 | 8.79E-01 | 1 |
| GPR155   | 405127  | 409  | 30  | 2243512 | 611252  | 0 | 7  | 3 | 0 | 31 | 36  | 12221480 | 8.79E-01 | 1 |
| HTR6     | 776287  | 266  | 32  | 1035604 | 385904  | 0 | 5  | 3 | 0 | 4  | 5   | 1164120  | 8.79E-01 | 1 |
| GIT2     | 939215  | 254  | 46  | 2019944 | 534712  | 0 | 3  | 3 | 0 | 50 | 62  | 26978036 | 8.80E-01 | 1 |
| USP6NL   | 300268  | 388  | 22  | 2182636 | 596300  | 0 | 2  | 2 | 0 | 34 | 27  | 16563612 | 8.80E-01 | 1 |
| PDZRN4   | 15244   | 1060 | -21 | 2708092 | 730868  | 0 | 10 | 4 | 0 | 50 | 85  | 21381716 | 8.80E-01 | 1 |
| SLC35C2  | 543487  | 612  | 42  | 924176  | 282664  | 0 | 2  | 2 | 0 | 19 | 36  | 9570348  | 8.80E-01 | 1 |
| APTX     | 833170  | 286  | -5  | 949452  | 236028  | 0 | 2  | 0 | 0 | 50 | 65  | 18547600 | 8.80E-01 | 1 |
| ARHGEF3  | NaN     | NaN  | NaN | 1218588 | 339624  | 0 | 2  | 2 | 0 | 50 | 118 | 39985208 | 8.80E-01 | 1 |
| SYNPR    | 152983  | 976  | -5  | 755788  | 209684  | 0 | 1  | 0 | 0 | 50 | 52  | 18613104 | 8.80E-01 | 1 |
| MED13L   | 186212  | 605  | -12 | 5630140 | 1584200 | 0 | 10 | 4 | 0 | 29 | 25  | 11262772 | 8.80E-01 | 1 |
| TMEM87B  | 564343  | 466  | 36  | 1488792 | 369528  | 0 | 2  | 2 | 0 | 50 | 55  | 23724196 | 8.80E-01 | 1 |
| CELF6    | 1128261 | 260  | 47  | 1226776 | 370952  | 0 | 2  | 0 | 0 | 23 | 29  | 10172700 | 8.80E-01 | 1 |
| FGD1     | 299313  | NaN  | 18  | 2419732 | 735140  | 0 | 6  | 2 | 0 | 35 | 49  | 16509500 | 8.80E-01 | 1 |
| ZNF597   | 1361831 | 303  | 29  | 1100396 | 274120  | 0 | 2  | 2 | 0 | 50 | 74  | 21539424 | 8.80E-01 | 1 |
| IGBP1    | 166319  | NaN  | 1   | 885016  | 225704  | 0 | 1  | 0 | 0 | 50 | 67  | 24685396 | 8.80E-01 | 1 |
| CRTC2    | 2028800 | 222  | 34  | 1721616 | 559632  | 0 | 7  | 4 | 0 | 25 | 39  | 8426876  | 8.80E-01 | 1 |
| C9orf171 | 1522970 | 492  | 36  | 812036  | 244216  | 0 | 3  | 3 | 0 | 5  | 9   | 1904956  | 8.80E-01 | 1 |
| CP       | 388273  | 312  | 10  | 2799228 | 693132  | 0 | 5  | 4 | 0 | 7  | 8   | 3570680  | 8.80E-01 | 1 |
| LRRC46   | 1071489 | 214  | 29  | 823072  | 238520  | 0 | 2  | 2 | 0 | 12 | 13  | 4017104  | 8.80E-01 | 1 |
| RPGRIP1  | 722324  | 263  | 39  | 3342840 | 881100  | 0 | 7  | 1 | 0 | 18 | 36  | 14750148 | 8.80E-01 | 1 |
| TAC1     | 343278  | 854  | -15 | 359560  | 82592   | 0 | 1  | 1 | 0 | 6  | 8   | 1624072  | 8.80E-01 | 1 |

|          |         |     |     |         |        |   |    |   |   |    |     |          |          |   |
|----------|---------|-----|-----|---------|--------|---|----|---|---|----|-----|----------|----------|---|
| SPATA20  | 1532661 | 200 | 20  | 2041660 | 601640 | 0 | 4  | 3 | 0 | 50 | 83  | 22594252 | 8.80E-01 | 1 |
| C1orf86  | 849779  | 293 | 25  | 866860  | 186188 | 0 | 2  | 2 | 0 | 5  | 9   | 2624788  | 8.80E-01 | 1 |
| DBX1     | 175444  | 453 | -5  | 928092  | 311856 | 0 | 1  | 2 | 0 | 50 | 45  | 19304812 | 8.80E-01 | 1 |
| RFX5     | 1322568 | 174 | 42  | 1527596 | 487720 | 0 | 4  | 0 | 0 | 6  | 11  | 3531520  | 8.80E-01 | 1 |
| ARHGEF1  | 1255704 | 364 | 28  | 2392320 | 702744 | 0 | 6  | 2 | 0 | 41 | 43  | 16154568 | 8.81E-01 | 1 |
| WWP2     | 1410481 | NaN | 42  | 2272348 | 618728 | 0 | 4  | 2 | 0 | 24 | 30  | 12332196 | 8.81E-01 | 1 |
| CBR3     | 261889  | 232 | 56  | 700964  | 200428 | 0 | 1  | 2 | 0 | 22 | 28  | 9427236  | 8.81E-01 | 1 |
| UAP1L1   | 1951939 | 202 | 40  | 1262732 | 401212 | 0 | 2  | 1 | 0 | 50 | 61  | 21392396 | 8.81E-01 | 1 |
| ZNF732   | NaN     | NaN | NaN | 1517984 | 364900 | 0 | 3  | 1 | 0 | 50 | 117 | 40010484 | 8.81E-01 | 1 |
| TJP3     | 2144458 | 206 | 34  | 2400152 | 735496 | 0 | 3  | 4 | 0 | 13 | 11  | 5053064  | 8.81E-01 | 1 |
| ZNF18    | 42879   | 557 | -52 | 1416168 | 371664 | 0 | 2  | 0 | 0 | 8  | 6   | 3291576  | 8.81E-01 | 1 |
| BSPRY    | 390186  | 297 | 36  | 1008904 | 305804 | 0 | 1  | 1 | 0 | 50 | 42  | 19391676 | 8.81E-01 | 1 |
| NBPF1    | 675669  | 259 | 40  | 3019592 | 738700 | 0 | 10 | 4 | 0 | 14 | 21  | 5843384  | 8.81E-01 | 1 |
| CUEDC2   | 975992  | 178 | 39  | 751160  | 205768 | 0 | 1  | 0 | 0 | 50 | 84  | 25980880 | 8.81E-01 | 1 |
| TMEM198  | 548994  | 487 | 35  | 856536  | 317196 | 0 | 1  | 1 | 0 | 50 | 86  | 24911100 | 8.81E-01 | 1 |
| NTSR1    | 1286411 | 208 | 27  | 1024212 | 331080 | 0 | 2  | 2 | 0 | 36 | 61  | 17235384 | 8.81E-01 | 1 |
| TMEM55B  | 464497  | 395 | 17  | 721256  | 217516 | 0 | 1  | 3 | 0 | 14 | 7   | 2572812  | 8.81E-01 | 1 |
| TSPAN5   | 217859  | 797 | 12  | 712000  | 179780 | 0 | 1  | 0 | 0 | 50 | 58  | 20050988 | 8.81E-01 | 1 |
| SLC2A9   | 222993  | 916 | 37  | 1426136 | 430048 | 0 | 3  | 1 | 0 | 50 | 62  | 19126456 | 8.81E-01 | 1 |
| RNAU1A1  | 831495  | 183 | 26  | 770028  | 189036 | 0 | 1  | 0 | 0 | 50 | 53  | 18469280 | 8.81E-01 | 1 |
| DCAF5    | 680338  | 289 | 33  | 2364908 | 690640 | 0 | 1  | 1 | 0 | 11 | 4   | 6311880  | 8.81E-01 | 1 |
| TBX20    | 154022  | 926 | 5   | 1133148 | 331080 | 0 | 2  | 0 | 0 | 3  | 0   | 739768   | 8.81E-01 | 1 |
| NFRSF111 | 179358  | 381 | 9   | 1048064 | 257032 | 0 | 2  | 1 | 0 | 50 | 67  | 20002216 | 8.81E-01 | 1 |
| NPL      | 651460  | 626 | 22  | 850484  | 224992 | 0 | 1  | 0 | 0 | 50 | 47  | 17472480 | 8.81E-01 | 1 |
| BCKDHA   | 1104034 | 376 | 38  | 1146320 | 318976 | 0 | 4  | 4 | 0 | 12 | 25  | 4126040  | 8.81E-01 | 1 |
| ZNF442   | 1744621 | 671 | -8  | 1637600 | 391600 | 0 | 6  | 1 | 0 | 50 | 86  | 23980872 | 8.81E-01 | 1 |
| PDCD6IP  | 293448  | 409 | 9   | 2254192 | 618728 | 0 | 4  | 2 | 0 | 50 | 55  | 23177380 | 8.81E-01 | 1 |
| CYP51A1  | 691564  | 461 | 26  | 1312572 | 359916 | 0 | 2  | 0 | 0 | 50 | 58  | 21780436 | 8.81E-01 | 1 |
| ZNF449   | 255033  | NaN | 36  | 1335712 | 344252 | 0 | 2  | 0 | 0 | 6  | 5   | 2594884  | 8.81E-01 | 1 |
| SF3B5    | 321795  | 374 | 17  | 223568  | 55180  | 0 | 2  | 1 | 0 | 1  | 1   | 206124   | 8.82E-01 | 1 |
| PANK2    | 712060  | 170 | 37  | 1410116 | 449272 | 0 | 3  | 3 | 0 | 35 | 46  | 14263140 | 8.82E-01 | 1 |
| FIG4     | 335902  | 637 | 29  | 2389828 | 613388 | 0 | 5  | 0 | 0 | 5  | 5   | 2979008  | 8.82E-01 | 1 |
| GFI1B    | 1887171 | 461 | 34  | 855112  | 231044 | 0 | 1  | 1 | 0 | 50 | 44  | 17804984 | 8.82E-01 | 1 |

|          |         |      |     |         |         |   |    |   |   |    |    |          |          |   |
|----------|---------|------|-----|---------|---------|---|----|---|---|----|----|----------|----------|---|
| ISL1     | 27991   | 1083 | -28 | 902816  | 239944  | 0 | 3  | 2 | 0 | 9  | 32 | 6472436  | 8.82E-01 | 1 |
| CYP4V2   | 371112  | 606  | -2  | 1371668 | 356356  | 0 | 3  | 1 | 0 | 25 | 27 | 9814208  | 8.82E-01 | 1 |
| CHD8     | 710667  | 380  | 34  | 6600596 | 1840876 | 0 | 14 | 7 | 0 | 15 | 20 | 7348196  | 8.82E-01 | 1 |
| BBS4     | 1110048 | 380  | 40  | 1381636 | 350660  | 0 | 2  | 1 | 0 | 50 | 73 | 18018584 | 8.82E-01 | 1 |
| FPR3     | 435870  | 690  | -35 | 877896  | 260592  | 0 | 2  | 1 | 0 | 50 | 83 | 20552236 | 8.82E-01 | 1 |
| ABCC5    | 1425631 | 375  | 43  | 3712368 | 1063728 | 0 | 14 | 3 | 0 | 0  | 3  | 1063728  | 8.82E-01 | 1 |
| RMND5A   | 431437  | 538  | 16  | 1027772 | 262372  | 0 | 2  | 0 | 0 | 50 | 60 | 20755156 | 8.82E-01 | 1 |
| PRR21    | 315906  | 569  | 21  | 913852  | 334640  | 0 | 1  | 1 | 0 | 35 | 41 | 15467488 | 8.82E-01 | 1 |
| TPRN     | 1722012 | 202  | 36  | 1624784 | 559276  | 0 | 4  | 3 | 0 | 4  | 6  | 2597020  | 8.82E-01 | 1 |
| SPEF1    | 860065  | 241  | 43  | 611608  | 173372  | 0 | 1  | 1 | 0 | 16 | 30 | 7457844  | 8.82E-01 | 1 |
| CEACAM5  | 1341589 | 499  | 16  | 1768608 | 522252  | 0 | 5  | 3 | 0 | 50 | 67 | 19496340 | 8.82E-01 | 1 |
| HIP1     | 785864  | 326  | 62  | 2728028 | 728020  | 0 | 7  | 1 | 0 | 7  | 14 | 4382004  | 8.82E-01 | 1 |
| NGRN     | 1036233 | 139  | 38  | 729088  | 217160  | 0 | 1  | 0 | 0 | 50 | 83 | 27989788 | 8.82E-01 | 1 |
| TOM1     | 362269  | 241  | -24 | 1272344 | 370240  | 0 | 4  | 1 | 0 | 28 | 46 | 12143872 | 8.82E-01 | 1 |
| FA2H     | 612822  | 173  | 27  | 949096  | 273764  | 0 | 1  | 1 | 0 | 50 | 39 | 16913204 | 8.82E-01 | 1 |
| GBP3     | 316278  | 598  | 5   | 1550736 | 401568  | 0 | 3  | 1 | 0 | 50 | 59 | 20056684 | 8.82E-01 | 1 |
| HCLS1    | 289905  | 613  | 25  | 1275904 | 337844  | 0 | 5  | 3 | 0 | 3  | 7  | 1618020  | 8.82E-01 | 1 |
| RCC2     | 399978  | 210  | 28  | 1342120 | 386972  | 0 | 2  | 0 | 0 | 28 | 38 | 15120032 | 8.82E-01 | 1 |
| RCBTB2   | 387005  | 404  | 41  | 1426848 | 393024  | 0 | 2  | 2 | 0 | 13 | 16 | 6737656  | 8.83E-01 | 1 |
| SEL1L3   | 247887  | 575  | 54  | 2939136 | 789252  | 0 | 6  | 1 | 0 | 34 | 26 | 11140664 | 8.83E-01 | 1 |
| GLCCI1   | 179344  | 405  | 24  | 1359564 | 426132  | 0 | 2  | 0 | 0 | 19 | 21 | 8617336  | 8.83E-01 | 1 |
| WDR24    | 1207790 | 194  | 33  | 1990040 | 580636  | 0 | 3  | 2 | 0 | 17 | 19 | 6751184  | 8.83E-01 | 1 |
| TEKT4    | 167705  | 749  | -6  | 1100396 | 322180  | 0 | 1  | 1 | 0 | 50 | 42 | 19395948 | 8.83E-01 | 1 |
| FNFAIP8L | 285978  | 427  | 26  | 741192  | 208260  | 0 | 3  | 2 | 0 | 2  | 5  | 1160204  | 8.83E-01 | 1 |
| OSTF1    | 94966   | 640  | 7   | 589892  | 137416  | 0 | 1  | 0 | 0 | 50 | 95 | 25771552 | 8.83E-01 | 1 |
| ATP1B1   | 231221  | 416  | 19  | 793524  | 201852  | 0 | 1  | 1 | 0 | 50 | 49 | 18870136 | 8.83E-01 | 1 |
| TRMT61A  | 900930  | 225  | 38  | 707728  | 234248  | 0 | 1  | 0 | 0 | 50 | 68 | 21985848 | 8.83E-01 | 1 |
| BIRC2    | 463959  | 312  | 15  | 1604136 | 409044  | 0 | 3  | 1 | 0 | 50 | 55 | 19641232 | 8.83E-01 | 1 |
| NEGR1    | 23816   | 1136 | -23 | 909224  | 255964  | 0 | 2  | 1 | 0 | 50 | 84 | 21257116 | 8.83E-01 | 1 |
| GABPB2   | 1614665 | 165  | 40  | 1135284 | 335352  | 0 | 2  | 2 | 0 | 36 | 47 | 15006468 | 8.83E-01 | 1 |
| VSIG8    | 803074  | 403  | 7   | 1038452 | 316840  | 0 | 2  | 2 | 0 | 50 | 49 | 15043848 | 8.83E-01 | 1 |
| FSTL5    | 9944    | 1215 | -23 | 2220728 | 560344  | 0 | 11 | 4 | 0 | 17 | 35 | 6852288  | 8.83E-01 | 1 |
| RGS12    | 570419  | 412  | 48  | 3690296 | 1096480 | 0 | 9  | 4 | 0 | 12 | 21 | 6353532  | 8.83E-01 | 1 |

|          |         |      |     |         |         |   |   |   |   |    |     |          |          |   |
|----------|---------|------|-----|---------|---------|---|---|---|---|----|-----|----------|----------|---|
| OR5I1    | 4262    | 1044 | -40 | 778572  | 229620  | 0 | 2 | 2 | 0 | 5  | 12  | 1863660  | 8.83E-01 | 1 |
| SPNS1    | 1189140 | 257  | 55  | 1300112 | 446068  | 0 | 5 | 2 | 0 | 7  | 10  | 2316848  | 8.83E-01 | 1 |
| ZNF23    | 383757  | 648  | -2  | 1677472 | 394448  | 0 | 4 | 2 | 0 | 50 | 51  | 16919968 | 8.83E-01 | 1 |
| OR9Q1    | 690075  | 744  | -13 | 767180  | 233536  | 0 | 4 | 4 | 0 | 10 | 25  | 3703824  | 8.83E-01 | 1 |
| OR6S1    | 709113  | 577  | 11  | 799576  | 264152  | 0 | 1 | 1 | 0 | 50 | 80  | 24629148 | 8.83E-01 | 1 |
| SPATA13  | 255006  | 569  | 36  | 3218240 | 923464  | 0 | 3 | 0 | 0 | 1  | 0   | 1267716  | 8.83E-01 | 1 |
| MAN1B1   | 1836975 | 202  | 38  | 1781780 | 514420  | 0 | 4 | 1 | 0 | 50 | 63  | 21774384 | 8.83E-01 | 1 |
| SLC22A17 | 1220624 | 456  | 31  | 1310792 | 452476  | 0 | 1 | 1 | 0 | 6  | 13  | 4269864  | 8.83E-01 | 1 |
| ANKS3    | 717235  | 194  | 35  | 1693492 | 479888  | 0 | 2 | 2 | 0 | 50 | 55  | 22982648 | 8.83E-01 | 1 |
| YKT6     | 1492561 | 412  | 68  | 521896  | 141332  | 0 | 1 | 0 | 0 | 50 | 62  | 15008604 | 8.83E-01 | 1 |
| SPSB3    | 1604603 | 288  | 36  | 904952  | 261304  | 0 | 1 | 1 | 0 | 50 | 49  | 20717064 | 8.84E-01 | 1 |
| CD68     | 1957426 | 194  | 24  | 879676  | 279104  | 0 | 1 | 0 | 0 | 17 | 20  | 7764360  | 8.84E-01 | 1 |
| PDCD11   | 544182  | 147  | 48  | 4777876 | 1369532 | 0 | 8 | 3 | 0 | 6  | 7   | 3223936  | 8.84E-01 | 1 |
| KCNQ2    | 1314528 | 298  | 49  | 2248496 | 685300  | 0 | 4 | 0 | 0 | 0  | 0   | 685300   | 8.84E-01 | 1 |
| CPNE4    | 238347  | 974  | 8   | 1473840 | 377004  | 0 | 3 | 3 | 0 | 30 | 30  | 12322228 | 8.84E-01 | 1 |
| ASMT     | NaN     | NaN  | NaN | 968320  | 270560  | 0 | 1 | 0 | 0 | 50 | 116 | 39916144 | 8.84E-01 | 1 |
| TMPRSS13 | 527704  | 576  | 45  | 1442868 | 430404  | 0 | 3 | 3 | 0 | 50 | 65  | 20508092 | 8.84E-01 | 1 |
| TBX3     | 32369   | 548  | -30 | 1839808 | 573872  | 0 | 8 | 1 | 0 | 11 | 21  | 4230348  | 8.84E-01 | 1 |
| RPRD1B   | 582740  | 137  | 45  | 837312  | 236028  | 0 | 2 | 3 | 0 | 8  | 8   | 2316492  | 8.84E-01 | 1 |
| SUCLG2   | 66926   | 891  | 7   | 1243508 | 340336  | 0 | 2 | 0 | 0 | 50 | 59  | 21334012 | 8.84E-01 | 1 |
| CCDC109E | 211934  | 479  | 26  | 880032  | 229620  | 0 | 1 | 0 | 0 | 50 | 43  | 17069132 | 8.84E-01 | 1 |
| ZDHHC23  | 441946  | 487  | 29  | 1036316 | 298684  | 0 | 1 | 1 | 0 | 31 | 22  | 11529772 | 8.84E-01 | 1 |
| IL12A    | 422983  | 616  | 22  | 658244  | 181204  | 0 | 1 | 0 | 0 | 50 | 54  | 15877956 | 8.84E-01 | 1 |
| OGDHL    | 251871  | 545  | 15  | 2607344 | 724816  | 0 | 8 | 5 | 0 | 13 | 24  | 7619468  | 8.84E-01 | 1 |
| PHF14    | 139683  | 990  | -2  | 2342836 | 574940  | 0 | 4 | 2 | 0 | 50 | 62  | 19591392 | 8.84E-01 | 1 |
| USP16    | 316514  | 178  | 57  | 2192960 | 519760  | 0 | 4 | 1 | 0 | 50 | 51  | 19604564 | 8.84E-01 | 1 |
| TRPM8    | 297512  | 527  | 14  | 2887160 | 760060  | 0 | 6 | 3 | 0 | 50 | 59  | 19292352 | 8.84E-01 | 1 |
| TPX2     | 890615  | 237  | 23  | 1960492 | 504452  | 0 | 6 | 0 | 0 | 10 | 11  | 3556796  | 8.84E-01 | 1 |
| C2CD2L   | 1390854 | 195  | 58  | 1750452 | 573516  | 0 | 5 | 0 | 0 | 0  | 0   | 573516   | 8.84E-01 | 1 |
| GPR135   | 168237  | 606  | 12  | 1153084 | 432896  | 0 | 2 | 0 | 0 | 4  | 3   | 1691356  | 8.85E-01 | 1 |
| VPS4A    | 1202748 | 125  | 20  | 1137776 | 308296  | 0 | 2 | 1 | 0 | 20 | 22  | 7617688  | 8.85E-01 | 1 |
| JPH1     | 236544  | 478  | -15 | 1666080 | 478464  | 0 | 4 | 3 | 0 | 50 | 73  | 21645868 | 8.85E-01 | 1 |
| SETBP1   | 15027   | 678  | 31  | 4141348 | 1196516 | 0 | 9 | 5 | 0 | 50 | 52  | 21407704 | 8.85E-01 | 1 |

|         |         |      |     |         |         |   |    |    |   |    |     |          |          |   |
|---------|---------|------|-----|---------|---------|---|----|----|---|----|-----|----------|----------|---|
| FOXI2   | 447201  | 806  | -35 | 763620  | 262728  | 0 | 1  | 0  | 0 | 50 | 62  | 17479956 | 8.85E-01 | 1 |
| MAT2B   | 225938  | 681  | 11  | 898188  | 234960  | 0 | 1  | 0  | 0 | 50 | 64  | 19585340 | 8.85E-01 | 1 |
| GRIK2   | 10349   | 1062 | -25 | 2490932 | 674620  | 0 | 11 | 4  | 0 | 50 | 142 | 30413080 | 8.85E-01 | 1 |
| MERTK   | NaN     | NaN  | NaN | 2568540 | 712356  | 0 | 6  | 2  | 0 | 50 | 118 | 40357940 | 8.85E-01 | 1 |
| WDR5    | 307164  | 368  | 38  | 900324  | 230688  | 0 | 1  | 1  | 0 | 50 | 42  | 17032108 | 8.85E-01 | 1 |
| ZNF707  | 2198262 | 229  | 33  | 947672  | 261304  | 0 | 1  | 1  | 0 | 50 | 57  | 21610980 | 8.85E-01 | 1 |
| GOLGB1  | 300562  | 591  | 28  | 8458560 | 2076192 | 0 | 29 | 13 | 0 | 35 | 39  | 13273460 | 8.85E-01 | 1 |
| LRCH3   | 520915  | 322  | 36  | 1834112 | 529372  | 0 | 6  | 0  | 0 | 0  | 0   | 529372   | 8.85E-01 | 1 |
| VTN     | 1405196 | 214  | 10  | 1256324 | 310432  | 0 | 2  | 0  | 0 | 4  | 2   | 1076900  | 8.85E-01 | 1 |
| C2orf57 | 994385  | 202  | 43  | 962268  | 308652  | 0 | 2  | 0  | 0 | 4  | 8   | 2679612  | 8.85E-01 | 1 |
| SMEK1   | 340189  | 467  | 40  | 2140984 | 553580  | 0 | 4  | 1  | 0 | 50 | 72  | 21076268 | 8.85E-01 | 1 |
| NIN     | 445811  | 257  | 34  | 5692084 | 1425068 | 0 | 14 | 4  | 0 | 37 | 51  | 14725584 | 8.85E-01 | 1 |
| KIF9    | 816399  | 242  | 46  | 2075836 | 543968  | 0 | 4  | 1  | 0 | 50 | 52  | 21285952 | 8.85E-01 | 1 |
| FN1     | 585272  | 533  | 13  | 6371688 | 1793172 | 0 | 19 | 11 | 0 | 45 | 58  | 17413028 | 8.85E-01 | 1 |
| AGAP2   | 1160849 | 344  | 39  | 3054480 | 1019940 | 0 | 4  | 7  | 0 | 12 | 13  | 5013548  | 8.85E-01 | 1 |
| CLTB    | 576954  | 347  | 45  | 603064  | 155216  | 0 | 1  | 1  | 0 | 9  | 9   | 2972600  | 8.85E-01 | 1 |
| RNF20   | 112827  | 872  | -13 | 2561064 | 647208  | 0 | 1  | 0  | 0 | 8  | 7   | 5043808  | 8.85E-01 | 1 |
| ARSA    | 1073094 | 203  | 43  | 1237456 | 424352  | 0 | 2  | 2  | 0 | 41 | 49  | 17129652 | 8.85E-01 | 1 |
| GALNT5  | 78933   | 837  | 8   | 2406204 | 649344  | 0 | 5  | 0  | 0 | 6  | 6   | 3381288  | 8.86E-01 | 1 |
| OLFML2B | 407279  | 388  | 15  | 1874696 | 561412  | 0 | 3  | 2  | 0 | 11 | 17  | 5260612  | 8.86E-01 | 1 |
| PDGFB   | 1046938 | 205  | 60  | 637596  | 186900  | 0 | 1  | 2  | 0 | 20 | 21  | 6546128  | 8.86E-01 | 1 |
| CACHD1  | 213591  | 581  | -6  | 3185132 | 847636  | 0 | 8  | 4  | 0 | 29 | 35  | 12212580 | 8.86E-01 | 1 |
| KIF5A   | 1347795 | 303  | 44  | 2721620 | 707728  | 0 | 6  | 0  | 0 | 3  | 4   | 2021724  | 8.86E-01 | 1 |
| SIK3    | 421847  | 300  | 34  | 3258112 | 892136  | 0 | 5  | 2  | 0 | 50 | 47  | 18002564 | 8.86E-01 | 1 |
| CNTLN   | 31539   | 761  | -22 | 3732660 | 914208  | 0 | 13 | 2  | 0 | 4  | 9   | 2996096  | 8.86E-01 | 1 |
| C4orf17 | 331308  | 847  | 9   | 934500  | 253116  | 0 | 2  | 1  | 0 | 50 | 70  | 18591744 | 8.86E-01 | 1 |
| CPXCR1  | 1148    | NaN  | -19 | 769316  | 202564  | 0 | 2  | 1  | 0 | 50 | 99  | 22169900 | 8.86E-01 | 1 |
| SYT9    | 97813   | 941  | -3  | 1255612 | 346388  | 0 | 3  | 0  | 0 | 14 | 21  | 6157376  | 8.86E-01 | 1 |
| ARID3A  | 2292363 | 206  | 44  | 1469212 | 463868  | 0 | 1  | 1  | 0 | 27 | 33  | 10566080 | 8.86E-01 | 1 |
| BLK     | 476916  | 493  | 55  | 1308656 | 362764  | 0 | 2  | 2  | 0 | 50 | 61  | 14342172 | 8.86E-01 | 1 |
| FGFRL1  | 689217  | 247  | 58  | 1239592 | 406196  | 0 | 2  | 1  | 0 | 41 | 49  | 16148160 | 8.86E-01 | 1 |
| EPB41L2 | 122847  | 707  | 17  | 2607700 | 696692  | 0 | 5  | 3  | 0 | 50 | 58  | 20138208 | 8.86E-01 | 1 |
| PRSS50  | 298503  | 495  | 41  | 968676  | 291564  | 0 | 2  | 0  | 0 | 50 | 70  | 18972664 | 8.86E-01 | 1 |



|         |         |      |     |         |         |   |    |   |   |    |    |          |          |   |
|---------|---------|------|-----|---------|---------|---|----|---|---|----|----|----------|----------|---|
| SLC37A1 | 440393  | 284  | 67  | 1389824 | 398008  | 0 | 2  | 1 | 0 | 41 | 47 | 18261020 | 8.86E-01 | 1 |
| SMAP1   | 169371  | 764  | 11  | 1210044 | 332148  | 0 | 2  | 0 | 0 | 45 | 56 | 19159920 | 8.86E-01 | 1 |
| MDM2    | 541243  | 228  | 32  | 1317556 | 320756  | 0 | 2  | 1 | 0 | 50 | 54 | 19475692 | 8.86E-01 | 1 |
| HOXD4   | 245316  | 874  | 13  | 627984  | 196512  | 0 | 1  | 2 | 0 | 41 | 61 | 15014300 | 8.86E-01 | 1 |
| GPR62   | 1013177 | 370  | 39  | 821648  | 360628  | 0 | 2  | 3 | 0 | 50 | 85 | 19762272 | 8.86E-01 | 1 |
| PVRL4   | 689033  | 250  | 23  | 1265936 | 405484  | 0 | 3  | 4 | 0 | 17 | 24 | 6314728  | 8.86E-01 | 1 |
| ATRX    | 548517  | NaN  | 8   | 6552892 | 1579928 | 0 | 19 | 2 | 0 | 6  | 12 | 4451068  | 8.86E-01 | 1 |
| CNTN3   | 5646    | 949  | -21 | 2660388 | 728376  | 0 | 4  | 3 | 0 | 50 | 63 | 20612044 | 8.86E-01 | 1 |
| EPDR1   | 100826  | 683  | 10  | 855112  | 260948  | 0 | 1  | 1 | 0 | 50 | 75 | 26634496 | 8.86E-01 | 1 |
| CHST11  | 1030269 | 419  | 34  | 896408  | 243148  | 0 | 2  | 3 | 0 | 15 | 18 | 4919208  | 8.86E-01 | 1 |
| PLD6    | 910162  | 218  | 11  | 612320  | 204700  | 0 | 1  | 1 | 0 | 50 | 78 | 21744124 | 8.86E-01 | 1 |
| CRB1    | 212549  | 428  | -23 | 3611264 | 943756  | 0 | 17 | 6 | 0 | 2  | 9  | 2333936  | 8.86E-01 | 1 |
| TEX11   | 615286  | NaN  | 4   | 2581712 | 603064  | 0 | 4  | 1 | 0 | 32 | 41 | 14463924 | 8.87E-01 | 1 |
| LXN     | 196969  | 940  | -12 | 593452  | 142400  | 0 | 1  | 1 | 0 | 30 | 30 | 8434352  | 8.87E-01 | 1 |
| EFHD1   | 301517  | 211  | 37  | 605200  | 176576  | 0 | 1  | 0 | 0 | 17 | 19 | 5445732  | 8.87E-01 | 1 |
| EFR3A   | 99296   | 999  | 6   | 2160564 | 567108  | 0 | 5  | 3 | 0 | 50 | 59 | 23627008 | 8.87E-01 | 1 |
| EFNA3   | 1696720 | 214  | 44  | 607336  | 177644  | 0 | 1  | 0 | 0 | 50 | 84 | 23988348 | 8.87E-01 | 1 |
| FOXP4   | 461476  | 388  | 43  | 1735144 | 515132  | 0 | 3  | 1 | 0 | 45 | 45 | 17266712 | 8.87E-01 | 1 |
| NIPAL2  | 612198  | 462  | 32  | 960132  | 269136  | 0 | 1  | 1 | 0 | 50 | 53 | 24244668 | 8.87E-01 | 1 |
| ECT2L   | 336688  | 610  | 20  | 2375944 | 605912  | 0 | 7  | 5 | 0 | 10 | 11 | 3534368  | 8.87E-01 | 1 |
| LMX1B   | 106522  | 480  | 39  | 1072984 | 285512  | 0 | 2  | 0 | 0 | 42 | 72 | 20606704 | 8.87E-01 | 1 |
| OR8K5   | 10101   | 1007 | -38 | 765400  | 220364  | 0 | 4  | 2 | 0 | 3  | 5  | 1002140  | 8.87E-01 | 1 |
| TBX1    | 728313  | 211  | 8   | 1481316 | 468852  | 0 | 3  | 0 | 0 | 29 | 37 | 13825260 | 8.87E-01 | 1 |
| IL13RA1 | 221322  | NaN  | 44  | 1139912 | 276256  | 0 | 2  | 1 | 0 | 50 | 81 | 24965924 | 8.87E-01 | 1 |
| DPH1    | 1415256 | 294  | 27  | 1130300 | 345676  | 0 | 2  | 2 | 0 | 50 | 68 | 21536932 | 8.87E-01 | 1 |
| MEGF8   | 792230  | 218  | 42  | 6878276 | 2196520 | 0 | 15 | 5 | 0 | 39 | 50 | 19147816 | 8.87E-01 | 1 |
| TSSK2   | 487560  | 277  | 18  | 892492  | 257744  | 0 | 1  | 1 | 0 | 36 | 33 | 13333268 | 8.87E-01 | 1 |
| TSPAN6  | 182582  | NaN  | -2  | 648276  | 170880  | 0 | 1  | 1 | 0 | 50 | 64 | 18681100 | 8.87E-01 | 1 |
| GGN     | 1467279 | 253  | 0   | 1515136 | 587756  | 0 | 1  | 0 | 0 | 1  | 0  | 1387688  | 8.87E-01 | 1 |
| WDR46   | 1456953 | 262  | 30  | 1556432 | 461020  | 0 | 4  | 3 | 0 | 50 | 71 | 20945260 | 8.87E-01 | 1 |
| SLC38A1 | 752720  | 334  | 9   | 1288720 | 338912  | 0 | 2  | 1 | 0 | 50 | 69 | 22957372 | 8.87E-01 | 1 |
| SLFN12L | NaN     | NaN  | NaN | 1589896 | 405128  | 0 | 2  | 3 | 0 | 26 | 43 | 11982248 | 8.87E-01 | 1 |
| RNPEPL1 | 837485  | 485  | 35  | 1253476 | 370952  | 0 | 2  | 1 | 0 | 50 | 53 | 18987616 | 8.87E-01 | 1 |

|          |         |     |     |         |         |   |    |   |   |    |    |          |          |   |
|----------|---------|-----|-----|---------|---------|---|----|---|---|----|----|----------|----------|---|
| ROBO3    | 175852  | 743 | 14  | 3462456 | 1096836 | 0 | 6  | 1 | 0 | 8  | 8  | 4227856  | 8.87E-01 | 1 |
| USP9Y    | 0       | 0   | 0   | 6674288 | 1703104 | 0 | 10 | 2 | 0 | 39 | 23 | 17595656 | 8.87E-01 | 1 |
| MUC20    | 907437  | 365 | 47  | 1294416 | 449628  | 0 | 4  | 3 | 0 | 25 | 54 | 15178772 | 8.87E-01 | 1 |
| WIPF3    | 400552  | 579 | 17  | 1160916 | 415452  | 0 | 2  | 0 | 0 | 14 | 19 | 6598104  | 8.87E-01 | 1 |
| SLC34A1  | 1038665 | 261 | 59  | 1657536 | 539340  | 0 | 5  | 0 | 0 | 0  | 0  | 539340   | 8.87E-01 | 1 |
| IRGQ     | 428891  | 209 | -2  | 1447140 | 560700  | 0 | 2  | 2 | 0 | 50 | 54 | 21487092 | 8.87E-01 | 1 |
| GK5      | 459081  | 395 | 25  | 1408336 | 353864  | 0 | 1  | 1 | 0 | 15 | 22 | 7005724  | 8.87E-01 | 1 |
| SYT8     | 916434  | 481 | 33  | 994664  | 329656  | 0 | 2  | 2 | 0 | 45 | 53 | 15935628 | 8.87E-01 | 1 |
| QPCTL    | 939821  | 180 | 44  | 929872  | 322892  | 0 | 4  | 0 | 0 | 3  | 7  | 1483096  | 8.87E-01 | 1 |
| UTP23    | 483166  | 504 | 23  | 639376  | 172304  | 0 | 2  | 2 | 0 | 7  | 11 | 2315068  | 8.87E-01 | 1 |
| UBR2     | 1007026 | 194 | 42  | 4795676 | 1180852 | 0 | 14 | 4 | 0 | 2  | 5  | 1640092  | 8.88E-01 | 1 |
| SCUBE1   | 473937  | 440 | 30  | 2587408 | 673196  | 0 | 6  | 2 | 0 | 17 | 18 | 7161652  | 8.88E-01 | 1 |
| USP26    | 88462   | NaN | 12  | 2329308 | 600216  | 0 | 4  | 3 | 0 | 19 | 19 | 8565360  | 8.88E-01 | 1 |
| MEMO1    | 342215  | 385 | 18  | 793880  | 195088  | 0 | 1  | 1 | 0 | 50 | 67 | 25053144 | 8.88E-01 | 1 |
| ABCG5    | 544941  | 480 | 35  | 1649704 | 490568  | 0 | 4  | 3 | 0 | 41 | 61 | 20014320 | 8.88E-01 | 1 |
| RRAGD    | 408382  | 574 | 54  | 1042012 | 268424  | 0 | 1  | 0 | 0 | 8  | 6  | 1849776  | 8.88E-01 | 1 |
| CYB5R4   | 87867   | 870 | -12 | 1395520 | 341048  | 0 | 1  | 1 | 0 | 8  | 21 | 6467096  | 8.88E-01 | 1 |
| CHM      | 57906   | NaN | -6  | 1737992 | 441796  | 0 | 1  | 0 | 0 | 24 | 34 | 12642628 | 8.88E-01 | 1 |
| PSG9     | 312803  | 148 | -41 | 1086512 | 305092  | 0 | 2  | 1 | 0 | 15 | 37 | 6807788  | 8.88E-01 | 1 |
| THOC6    | 1443513 | 234 | 49  | 893560  | 257744  | 0 | 1  | 1 | 0 | 50 | 48 | 18953440 | 8.88E-01 | 1 |
| KCNK13   | 300869  | 604 | 12  | 1008904 | 305804  | 0 | 2  | 0 | 0 | 50 | 73 | 20592108 | 8.88E-01 | 1 |
| AKR1A1   | 873800  | 161 | 27  | 838380  | 242436  | 0 | 1  | 2 | 0 | 50 | 63 | 21320128 | 8.88E-01 | 1 |
| ASS1     | 502828  | 260 | 35  | 1098616 | 284444  | 0 | 1  | 1 | 0 | 50 | 62 | 22656196 | 8.88E-01 | 1 |
| MFSD7    | 639827  | 489 | 12  | 1430052 | 476328  | 0 | 3  | 1 | 0 | 40 | 48 | 16311920 | 8.88E-01 | 1 |
| SH3PXD2E | 495571  | 267 | 42  | 2311864 | 661448  | 0 | 5  | 6 | 0 | 10 | 13 | 3358860  | 8.89E-01 | 1 |
| DDX43    | 723493  | 232 | 21  | 1704172 | 443576  | 0 | 2  | 2 | 0 | 50 | 68 | 20465372 | 8.89E-01 | 1 |
| YBX1     | 650376  | 461 | 21  | 834820  | 236384  | 0 | 1  | 0 | 0 | 50 | 60 | 20231480 | 8.89E-01 | 1 |
| MTMR10   | 279767  | 591 | 22  | 2032048 | 529016  | 0 | 3  | 1 | 0 | 41 | 41 | 20057396 | 8.89E-01 | 1 |
| ANKRD17  | 265492  | 747 | 19  | 6518716 | 1965476 | 0 | 13 | 6 | 0 | 38 | 38 | 17495264 | 8.89E-01 | 1 |
| CLEC4F   | 596622  | 629 | 24  | 1522612 | 395516  | 0 | 3  | 1 | 0 | 50 | 44 | 16827408 | 8.89E-01 | 1 |
| LRIT3    | 212757  | 462 | 28  | 1570672 | 472412  | 0 | 5  | 3 | 0 | 13 | 17 | 4637968  | 8.89E-01 | 1 |
| HSD17B1  | 1884163 | 177 | 38  | 804916  | 270560  | 0 | 1  | 1 | 0 | 50 | 68 | 23826724 | 8.89E-01 | 1 |
| NEDD4    | 259242  | 271 | -1  | 3697772 | 966184  | 0 | 6  | 4 | 0 | 39 | 33 | 14654384 | 8.89E-01 | 1 |

|          |         |      |     |          |         |   |    |   |   |    |    |          |          |   |
|----------|---------|------|-----|----------|---------|---|----|---|---|----|----|----------|----------|---|
| ZNF610   | 526380  | 960  | -32 | 1200788  | 299752  | 0 | 5  | 2 | 0 | 50 | 87 | 21714576 | 8.89E-01 | 1 |
| TARSL2   | 255024  | 469  | 2   | 2123540  | 528304  | 0 | 4  | 2 | 0 | 50 | 57 | 23664744 | 8.89E-01 | 1 |
| C8B      | 38776   | 713  | -12 | 1548956  | 396940  | 0 | 3  | 1 | 0 | 15 | 40 | 12821696 | 8.89E-01 | 1 |
| MAD2L2   | 682357  | 264  | 32  | 564616   | 148808  | 0 | 1  | 1 | 0 | 8  | 13 | 3283032  | 8.89E-01 | 1 |
| CD99L2   | 287647  | NaN  | 12  | 699540   | 185832  | 0 | 1  | 1 | 0 | 50 | 74 | 19695700 | 8.89E-01 | 1 |
| TNXB     | 2242514 | 203  | 33  | 12062704 | 3833408 | 0 | 26 | 7 | 0 | 4  | 7  | 4563564  | 8.89E-01 | 1 |
| FDXR     | 1027517 | 320  | 20  | 1246712  | 398008  | 0 | 3  | 2 | 0 | 10 | 17 | 5209348  | 8.89E-01 | 1 |
| FOXEE3   | 193133  | 347  | 8   | 738700   | 286580  | 0 | 1  | 2 | 0 | 28 | 42 | 11461064 | 8.89E-01 | 1 |
| AK7      | 328475  | 560  | 14  | 1914212  | 480244  | 0 | 5  | 6 | 0 | 14 | 22 | 5637972  | 8.89E-01 | 1 |
| OR2AE1   | 1535089 | 438  | 36  | 797440   | 240656  | 0 | 1  | 0 | 0 | 50 | 61 | 21736292 | 8.89E-01 | 1 |
| PREX1    | 752875  | 360  | 47  | 4313296  | 1174088 | 0 | 11 | 3 | 0 | 50 | 60 | 23469300 | 8.89E-01 | 1 |
| CTDSP2   | 1051368 | 243  | 40  | 702032   | 199360  | 0 | 1  | 0 | 0 | 50 | 63 | 19246784 | 8.89E-01 | 1 |
| IGFBP4   | 1202660 | 149  | 21  | 645784   | 196868  | 0 | 1  | 1 | 0 | 50 | 67 | 18633040 | 8.89E-01 | 1 |
| CRTP13-1 | 4608    | 1035 | -69 | 434676   | 120684  | 0 | 1  | 1 | 0 | 39 | 55 | 9409080  | 8.90E-01 | 1 |
| FBXO7    | 371339  | 401  | 3   | 1350664  | 400856  | 0 | 2  | 1 | 0 | 50 | 51 | 19098332 | 8.90E-01 | 1 |
| HCN3     | 1574928 | 194  | 45  | 1882528  | 632612  | 0 | 4  | 3 | 0 | 50 | 57 | 20795740 | 8.90E-01 | 1 |
| SLC22A11 | 1970283 | 411  | 54  | 1364904  | 438948  | 0 | 3  | 1 | 0 | 50 | 67 | 19338632 | 8.90E-01 | 1 |
| ADAR     | 1927515 | 403  | 36  | 3117136  | 873980  | 0 | 11 | 1 | 0 | 2  | 5  | 1751164  | 8.90E-01 | 1 |
| FBXL16   | 1207790 | 194  | 33  | 1168036  | 391244  | 0 | 2  | 1 | 0 | 17 | 19 | 6751184  | 8.90E-01 | 1 |
| LANCL3   | 108134  | NaN  | 13  | 1105024  | 335708  | 0 | 1  | 0 | 0 | 6  | 3  | 2249564  | 8.90E-01 | 1 |
| NDRG1    | 234084  | 322  | 0   | 1045928  | 283732  | 0 | 1  | 0 | 0 | 50 | 63 | 28611720 | 8.90E-01 | 1 |
| SLCO2A1  | 547213  | 487  | 21  | 1636176  | 482736  | 0 | 5  | 1 | 0 | 50 | 66 | 17217228 | 8.90E-01 | 1 |
| PCDHGB4  | 662513  | 568  | 2   | 2284808  | 700252  | 0 | 8  | 4 | 0 | 36 | 67 | 17833108 | 8.90E-01 | 1 |
| SNX11    | 1195543 | 255  | 11  | 697404   | 196512  | 0 | 1  | 0 | 0 | 31 | 39 | 12335044 | 8.90E-01 | 1 |
| HIST1H1D | 390169  | 544  | 57  | 540052   | 175508  | 0 | 1  | 2 | 0 | 36 | 34 | 7770412  | 8.90E-01 | 1 |
| LILRA2   | 819283  | 601  | -4  | 1217520  | 365256  | 0 | 3  | 3 | 0 | 23 | 60 | 10718448 | 8.90E-01 | 1 |
| DLG4     | 1732485 | 316  | 18  | 2022436  | 562124  | 0 | 4  | 1 | 0 | 17 | 14 | 5459260  | 8.90E-01 | 1 |
| ARHGAP10 | 75227   | 678  | 22  | 2087584  | 527948  | 0 | 2  | 0 | 0 | 14 | 14 | 5768624  | 8.90E-01 | 1 |
| KCNN2    | 7106    | 987  | 0   | 1463160  | 425064  | 0 | 5  | 2 | 0 | 14 | 26 | 6280196  | 8.90E-01 | 1 |
| UBE2L6   | 923607  | 249  | 32  | 398364   | 110004  | 0 | 2  | 2 | 0 | 3  | 7  | 991816   | 8.90E-01 | 1 |
| PPAP2B   | 39932   | 563  | 7   | 799220   | 221788  | 0 | 1  | 1 | 0 | 50 | 80 | 27848456 | 8.90E-01 | 1 |
| TPI1     | 2822601 | 232  | 32  | 739056   | 208260  | 0 | 1  | 1 | 0 | 50 | 62 | 20662240 | 8.90E-01 | 1 |
| TRIM2    | 222401  | 350  | 14  | 1971528  | 551088  | 0 | 4  | 3 | 0 | 50 | 59 | 21507740 | 8.90E-01 | 1 |

|         |         |     |     |         |         |   |    |    |   |    |    |          |          |   |
|---------|---------|-----|-----|---------|---------|---|----|----|---|----|----|----------|----------|---|
| LETM1   | 851373  | 239 | 44  | 1881104 | 545392  | 0 | 2  | 2  | 0 | 50 | 72 | 23546552 | 8.90E-01 | 1 |
| COL6A3  | 423594  | 399 | 10  | 7980452 | 2435752 | 0 | 28 | 13 | 0 | 2  | 19 | 5477772  | 8.90E-01 | 1 |
| KCTD3   | 82180   | 597 | -30 | 2102892 | 584196  | 0 | 8  | 2  | 0 | 50 | 91 | 19692496 | 8.90E-01 | 1 |
| TAS2R46 | 371136  | 676 | 4   | 775724  | 217516  | 0 | 1  | 1  | 0 | 50 | 58 | 20325464 | 8.91E-01 | 1 |
| C1QL4   | 2137968 | 175 | 37  | 573872  | 196156  | 0 | 1  | 2  | 0 | 8  | 15 | 4118564  | 8.91E-01 | 1 |
| DLK2    | 1278255 | 230 | 56  | 959420  | 292276  | 0 | 1  | 0  | 0 | 50 | 54 | 19955936 | 8.91E-01 | 1 |
| ZC3H12A | 446254  | 357 | 25  | 1473840 | 469920  | 0 | 5  | 3  | 0 | 2  | 4  | 1202212  | 8.91E-01 | 1 |
| OR2C3   | 272980  | 927 | -14 | 786404  | 246352  | 0 | 3  | 3  | 0 | 9  | 13 | 2441804  | 8.91E-01 | 1 |
| LARP6   | 250598  | 339 | 10  | 1297264 | 379496  | 0 | 2  | 1  | 0 | 50 | 54 | 19786124 | 8.91E-01 | 1 |
| ZC3H12B | 321325  | NaN | 10  | 2122472 | 578500  | 0 | 4  | 0  | 0 | 9  | 13 | 5384144  | 8.91E-01 | 1 |
| SLC5A1  | 451895  | 458 | -26 | 1704528 | 485940  | 0 | 4  | 3  | 0 | 21 | 26 | 7887892  | 8.91E-01 | 1 |
| PDK4    | 195488  | 393 | -3  | 1075832 | 286936  | 0 | 1  | 0  | 0 | 50 | 50 | 22095852 | 8.91E-01 | 1 |
| SLITRK1 | 9008    | 874 | -31 | 1717700 | 515488  | 0 | 7  | 1  | 0 | 50 | 87 | 19973380 | 8.91E-01 | 1 |
| NAT2    | 322678  | 627 | -26 | 736208  | 200428  | 0 | 1  | 0  | 0 | 31 | 56 | 15832744 | 8.91E-01 | 1 |
| OR1J4   | 373314  | 646 | 3   | 762552  | 242436  | 0 | 1  | 0  | 0 | 50 | 63 | 22349324 | 8.91E-01 | 1 |
| OR5P2   | 103028  | 823 | -1  | 790320  | 244572  | 0 | 1  | 2  | 0 | 21 | 26 | 9293380  | 8.91E-01 | 1 |
| DGAT1   | 2525749 | 200 | 28  | 1275192 | 359916  | 0 | 3  | 2  | 0 | 4  | 8  | 1894276  | 8.91E-01 | 1 |
| KLHDC10 | 428896  | 266 | 37  | 1139556 | 318264  | 0 | 1  | 0  | 0 | 50 | 39 | 17425488 | 8.91E-01 | 1 |
| HHLA2   | 281982  | 859 | 7   | 1088648 | 275188  | 0 | 2  | 1  | 0 | 50 | 73 | 21583212 | 8.91E-01 | 1 |
| DHCR7   | 507631  | 626 | 51  | 1202924 | 352084  | 0 | 2  | 1  | 0 | 18 | 11 | 4290868  | 8.91E-01 | 1 |
| SDK1    | 48060   | 954 | -23 | 5585284 | 1696340 | 0 | 14 | 5  | 0 | 9  | 19 | 5457480  | 8.91E-01 | 1 |
| ZNF396  | 306655  | 499 | 43  | 865436  | 221788  | 0 | 2  | 1  | 0 | 50 | 78 | 19811756 | 8.91E-01 | 1 |
| FHOD3   | 336896  | 728 | 61  | 3672140 | 1046284 | 0 | 6  | 2  | 0 | 26 | 39 | 13026396 | 8.91E-01 | 1 |
| PHYH    | 246468  | 433 | 33  | 894628  | 227840  | 0 | 1  | 1  | 0 | 50 | 59 | 23759084 | 8.91E-01 | 1 |
| TRIM44  | 605264  | 411 | -6  | 909580  | 212888  | 0 | 1  | 0  | 0 | 50 | 48 | 19517344 | 8.91E-01 | 1 |
| SHROOM4 | 36907   | NaN | 11  | 3755800 | 1067288 | 0 | 7  | 1  | 0 | 5  | 13 | 6103620  | 8.92E-01 | 1 |
| NCOA5   | 595034  | 381 | 53  | 1461380 | 426844  | 0 | 4  | 4  | 0 | 17 | 37 | 7854428  | 8.92E-01 | 1 |
| TJAP1   | 1278255 | 230 | 56  | 1398368 | 431116  | 0 | 2  | 0  | 0 | 50 | 54 | 19955936 | 8.92E-01 | 1 |
| USP2    | 1054477 | 263 | 40  | 1651484 | 500536  | 0 | 4  | 3  | 0 | 50 | 80 | 23473572 | 8.92E-01 | 1 |
| ZNF778  | 1307930 | 254 | 38  | 1855116 | 500892  | 0 | 4  | 1  | 0 | 50 | 57 | 20720624 | 8.92E-01 | 1 |
| GK      | 82798   | NaN | 34  | 1496624 | 383056  | 0 | 2  | 0  | 0 | 40 | 44 | 17244640 | 8.92E-01 | 1 |
| GPAA1   | 2720766 | 211 | 27  | 1518340 | 523676  | 0 | 3  | 2  | 0 | 25 | 30 | 10299080 | 8.92E-01 | 1 |
| KRT5    | 1280474 | 464 | 36  | 1482740 | 445000  | 0 | 6  | 2  | 0 | 3  | 5  | 1590964  | 8.92E-01 | 1 |

|          |         |      |     |         |         |   |    |   |   |    |    |          |          |   |
|----------|---------|------|-----|---------|---------|---|----|---|---|----|----|----------|----------|---|
| SLC16A9  | 135396  | 527  | -16 | 1286228 | 369172  | 0 | 2  | 2 | 0 | 17 | 16 | 6540788  | 8.92E-01 | 1 |
| NFE2L1   | 1205950 | 255  | 20  | 1908160 | 585620  | 0 | 3  | 3 | 0 | 5  | 6  | 2531160  | 8.92E-01 | 1 |
| C2orf44  | 243145  | 226  | 33  | 1798868 | 527236  | 0 | 5  | 1 | 0 | 33 | 43 | 11192996 | 8.92E-01 | 1 |
| AP3M1    | 776926  | 227  | 49  | 1085088 | 291564  | 0 | 1  | 1 | 0 | 50 | 44 | 19288436 | 8.92E-01 | 1 |
| ABCB4    | 225315  | 837  | 8   | 3316852 | 924176  | 0 | 9  | 1 | 0 | 40 | 46 | 16648696 | 8.92E-01 | 1 |
| NWD1     | 947233  | 293  | 35  | 3553236 | 1092564 | 0 | 11 | 4 | 0 | 18 | 31 | 9222536  | 8.92E-01 | 1 |
| TAS2R5   | 200522  | 844  | 14  | 743684  | 217516  | 0 | 1  | 1 | 0 | 50 | 60 | 17687504 | 8.92E-01 | 1 |
| TRUB1    | 188808  | 343  | 9   | 887508  | 265932  | 0 | 3  | 2 | 0 | 6  | 19 | 3921340  | 8.92E-01 | 1 |
| CALCOCO  | 1501666 | 272  | 56  | 1780356 | 496620  | 0 | 4  | 1 | 0 | 25 | 33 | 11784668 | 8.92E-01 | 1 |
| TSR1     | 780080  | 271  | 29  | 2091856 | 549308  | 0 | 4  | 0 | 0 | 6  | 7  | 3452132  | 8.92E-01 | 1 |
| TRPM4    | 2151496 | 267  | 43  | 3043088 | 954436  | 0 | 7  | 3 | 0 | 50 | 72 | 21458256 | 8.92E-01 | 1 |
| EIF3H    | 483437  | 504  | 11  | 930228  | 232824  | 0 | 1  | 0 | 0 | 50 | 62 | 20131444 | 8.92E-01 | 1 |
| VSTM2L   | 604196  | 440  | 54  | 510860  | 158776  | 0 | 1  | 1 | 0 | 24 | 57 | 11546504 | 8.92E-01 | 1 |
| SELE     | 269222  | 597  | 12  | 1606984 | 406196  | 0 | 5  | 2 | 0 | 50 | 64 | 18409116 | 8.92E-01 | 1 |
| LGR5     | 250555  | 516  | -34 | 2316492 | 667500  | 0 | 10 | 6 | 0 | 7  | 13 | 2280536  | 8.92E-01 | 1 |
| PNPT1    | 501257  | 354  | 17  | 2071564 | 557852  | 0 | 7  | 0 | 0 | 0  | 0  | 557852   | 8.92E-01 | 1 |
| ATP6V1B2 | 158991  | 511  | -4  | 1320760 | 375224  | 0 | 1  | 0 | 0 | 3  | 0  | 1182632  | 8.92E-01 | 1 |
| API5     | 349378  | 924  | -23 | 1379856 | 357780  | 0 | 4  | 2 | 0 | 50 | 95 | 21664380 | 8.93E-01 | 1 |
| CHGA     | 325312  | 387  | 30  | 1175868 | 321468  | 0 | 1  | 1 | 0 | 50 | 42 | 21567904 | 8.93E-01 | 1 |
| B3GNT7   | 1124713 | 359  | 42  | 984696  | 307584  | 0 | 2  | 2 | 0 | 50 | 75 | 18162764 | 8.93E-01 | 1 |
| FLVCR1   | 326908  | 445  | 13  | 1387688 | 432184  | 0 | 2  | 3 | 0 | 50 | 47 | 18388112 | 8.93E-01 | 1 |
| B3GNT6   | 368988  | 395  | 37  | 922752  | 316128  | 0 | 1  | 3 | 0 | 8  | 5  | 2893924  | 8.93E-01 | 1 |
| TAF2     | 272257  | 591  | 13  | 3169468 | 782132  | 0 | 8  | 3 | 0 | 50 | 67 | 18638736 | 8.93E-01 | 1 |
| CADPS2   | 61224   | 1046 | -3  | 3443232 | 883236  | 0 | 9  | 3 | 0 | 50 | 48 | 16856956 | 8.93E-01 | 1 |
| RPUSD1   | 1187310 | 273  | 39  | 777504  | 246708  | 0 | 1  | 0 | 0 | 50 | 70 | 23301268 | 8.93E-01 | 1 |
| PRKACB   | 205640  | 919  | -13 | 1107516 | 274476  | 0 | 2  | 0 | 0 | 50 | 59 | 18889360 | 8.93E-01 | 1 |
| PRMT1    | 1733181 | 195  | 36  | 987188  | 249556  | 0 | 1  | 1 | 0 | 9  | 8  | 4296208  | 8.93E-01 | 1 |
| NEK6     | 483948  | 406  | 41  | 991460  | 250624  | 0 | 2  | 2 | 0 | 12 | 13 | 4070860  | 8.93E-01 | 1 |
| MLLT1    | 1294183 | 417  | 20  | 1438952 | 402280  | 0 | 3  | 1 | 0 | 50 | 60 | 18011108 | 8.93E-01 | 1 |
| PCDHA10  | NaN     | NaN  | NaN | 2431836 | 774300  | 0 | 8  | 5 | 0 | 26 | 45 | 12351420 | 8.93E-01 | 1 |
| PRDM7    | 822636  | 221  | 26  | 1334288 | 288004  | 0 | 2  | 1 | 0 | 50 | 59 | 21945976 | 8.93E-01 | 1 |
| RAD51AP1 | 275215  | 908  | 30  | 933432  | 236028  | 0 | 1  | 0 | 0 | 50 | 52 | 20960924 | 8.93E-01 | 1 |
| COL27A1  | 224550  | 425  | 3   | 4672856 | 1545040 | 0 | 6  | 5 | 0 | 37 | 26 | 14881512 | 8.93E-01 | 1 |

|          |         |      |     |         |         |   |    |    |   |    |     |          |          |   |
|----------|---------|------|-----|---------|---------|---|----|----|---|----|-----|----------|----------|---|
| SLC22A13 | 301168  | 437  | 22  | 1379144 | 430048  | 0 | 4  | 0  | 0 | 4  | 6   | 2137068  | 8.93E-01 | 1 |
| STC1     | 321715  | 555  | 14  | 632256  | 175152  | 0 | 1  | 2  | 0 | 13 | 21  | 5172680  | 8.93E-01 | 1 |
| NTRK3    | 124519  | 730  | -57 | 2399796 | 646140  | 0 | 5  | 3  | 0 | 18 | 41  | 11566796 | 8.93E-01 | 1 |
| CYP2B6   | 1041792 | 375  | 14  | 1255256 | 357424  | 0 | 7  | 5  | 0 | 20 | 36  | 5344628  | 8.93E-01 | 1 |
| TAS2R43  | 371136  | 676  | 4   | 784268  | 213244  | 0 | 1  | 1  | 0 | 50 | 58  | 20325464 | 8.93E-01 | 1 |
| PDHB     | 567081  | 265  | 35  | 938060  | 255964  | 0 | 1  | 0  | 0 | 50 | 52  | 21882608 | 8.93E-01 | 1 |
| PDLIM2   | 757216  | 224  | 45  | 1007480 | 292276  | 0 | 1  | 1  | 0 | 48 | 49  | 21352880 | 8.93E-01 | 1 |
| MCL1     | 1475649 | 152  | 31  | 885728  | 259168  | 0 | 2  | 3  | 0 | 7  | 11  | 2967260  | 8.93E-01 | 1 |
| ZNF260   | 644122  | 889  | -48 | 1070848 | 252404  | 0 | 3  | 0  | 0 | 3  | 4   | 1145252  | 8.93E-01 | 1 |
| HAVCR1   | 138350  | 1207 | 11  | 919192  | 284444  | 0 | 1  | 0  | 0 | 50 | 51  | 21035328 | 8.93E-01 | 1 |
| OR5B12   | 190469  | 812  | -10 | 784624  | 228908  | 0 | 1  | 0  | 0 | 50 | 71  | 21027140 | 8.93E-01 | 1 |
| MED16    | 2168802 | 198  | 28  | 2197588 | 679604  | 0 | 3  | 3  | 0 | 50 | 73  | 22578944 | 8.93E-01 | 1 |
| GNAT3    | 118115  | 385  | -32 | 938060  | 227128  | 0 | 2  | 0  | 0 | 50 | 87  | 21817816 | 8.93E-01 | 1 |
| HRC      | 2011861 | 267  | 47  | 1841588 | 424708  | 0 | 7  | 4  | 0 | 6  | 12  | 2720552  | 8.93E-01 | 1 |
| MTIF2    | 964970  | 349  | 25  | 1888936 | 501248  | 0 | 8  | 1  | 0 | 11 | 18  | 4282680  | 8.93E-01 | 1 |
| C12orf56 | 475083  | 294  | -12 | 1611256 | 436100  | 0 | 3  | 2  | 0 | 50 | 51  | 19738776 | 8.93E-01 | 1 |
| ANO3     | 20260   | 970  | -20 | 2629416 | 627984  | 0 | 6  | 1  | 0 | 18 | 23  | 7387000  | 8.93E-01 | 1 |
| SAC3D1   | 3267059 | 207  | 46  | 847636  | 310076  | 0 | 1  | 0  | 0 | 34 | 42  | 13459292 | 8.93E-01 | 1 |
| C3       | 740979  | 259  | 28  | 4315432 | 1191176 | 0 | 17 | 8  | 0 | 7  | 14  | 3839816  | 8.94E-01 | 1 |
| CACNG1   | 300354  | 491  | -30 | 569600  | 159844  | 0 | 1  | 1  | 0 | 50 | 89  | 22343272 | 8.94E-01 | 1 |
| MTHFD1   | 640692  | 221  | 45  | 2426852 | 687436  | 0 | 6  | 2  | 0 | 50 | 64  | 22356088 | 8.94E-01 | 1 |
| ZNF404   | 464802  | 286  | 11  | 1436104 | 330368  | 0 | 6  | 0  | 0 | 3  | 5   | 1651128  | 8.94E-01 | 1 |
| CFHR3    | 200038  | 941  | -27 | 866504  | 217516  | 0 | 2  | 1  | 0 | 50 | 99  | 23208708 | 8.94E-01 | 1 |
| MBD3     | 2122824 | 221  | 35  | 754720  | 204344  | 0 | 1  | 1  | 0 | 50 | 54  | 18221504 | 8.94E-01 | 1 |
| CHD7     | 248521  | 572  | 45  | 7673936 | 2085448 | 0 | 26 | 10 | 0 | 43 | 54  | 14720600 | 8.94E-01 | 1 |
| CEACAM1  | 749323  | 335  | -51 | 766824  | 227484  | 0 | 2  | 1  | 0 | 50 | 84  | 18078392 | 8.94E-01 | 1 |
| ADAM20   | 333836  | 706  | 26  | 1968680 | 525100  | 0 | 2  | 1  | 0 | 50 | 48  | 24682192 | 8.94E-01 | 1 |
| KRT14    | 1494501 | 323  | 11  | 1198652 | 348880  | 0 | 2  | 0  | 0 | 20 | 34  | 10955900 | 8.94E-01 | 1 |
| ASAH1    | 366238  | 474  | 20  | 1181920 | 305804  | 0 | 2  | 0  | 0 | 7  | 11  | 3334296  | 8.94E-01 | 1 |
| JMJD7    | NaN     | NaN  | NaN | 816664  | 231044  | 0 | 1  | 1  | 0 | 50 | 117 | 39876628 | 8.94E-01 | 1 |
| PASD1    | 153115  | NaN  | 3   | 2025640 | 518336  | 0 | 3  | 2  | 0 | 26 | 25  | 12104712 | 8.94E-01 | 1 |
| LHX4     | 463883  | 254  | 13  | 1001784 | 272340  | 0 | 3  | 2  | 0 | 9  | 28  | 6325764  | 8.94E-01 | 1 |
| FAM124A  | 175682  | 518  | 37  | 1440376 | 444644  | 0 | 6  | 3  | 0 | 8  | 14  | 2479184  | 8.94E-01 | 1 |

|          |         |     |     |         |         |   |    |   |   |    |    |          |          |   |
|----------|---------|-----|-----|---------|---------|---|----|---|---|----|----|----------|----------|---|
| SMAD7    | 160419  | 191 | 79  | 1049844 | 331080  | 0 | 3  | 2 | 0 | 9  | 19 | 4240672  | 8.94E-01 | 1 |
| GLB1     | 520588  | 372 | 29  | 1762912 | 473480  | 0 | 3  | 2 | 0 | 50 | 65 | 22749824 | 8.94E-01 | 1 |
| PGAM5    | 724450  | 495 | 35  | 765044  | 242080  | 0 | 1  | 2 | 0 | 19 | 29 | 9337168  | 8.94E-01 | 1 |
| SUCLA2   | 322899  | 636 | 35  | 1206840 | 324672  | 0 | 2  | 1 | 0 | 34 | 29 | 10524072 | 8.94E-01 | 1 |
| SCNN1G   | 547445  | 631 | 23  | 1683168 | 450696  | 0 | 3  | 2 | 0 | 45 | 44 | 16098320 | 8.94E-01 | 1 |
| REPIN1   | 315538  | 514 | 32  | 1520120 | 493060  | 0 | 2  | 0 | 0 | 12 | 10 | 4964420  | 8.94E-01 | 1 |
| HRFAM7L  | 313450  | 686 | -8  | 1064796 | 292632  | 0 | 2  | 0 | 0 | 50 | 59 | 21348252 | 8.94E-01 | 1 |
| GSG2     | NaN     | NaN | NaN | 1961560 | 600572  | 0 | 4  | 0 | 0 | 7  | 14 | 4288732  | 8.94E-01 | 1 |
| PIM1     | 705207  | 236 | 50  | 801000  | 226416  | 0 | 1  | 0 | 0 | 50 | 60 | 20782924 | 8.94E-01 | 1 |
| RELB     | 1135715 | 208 | 25  | 1433968 | 462800  | 0 | 3  | 3 | 0 | 30 | 44 | 12265624 | 8.94E-01 | 1 |
| OR13F1   | 146816  | 930 | -33 | 784268  | 238876  | 0 | 2  | 0 | 0 | 50 | 86 | 17955928 | 8.94E-01 | 1 |
| EPM2AIP1 | 392784  | 473 | 21  | 1515848 | 432184  | 0 | 5  | 0 | 0 | 5  | 11 | 3117848  | 8.94E-01 | 1 |
| TANC1    | 311739  | 405 | 27  | 4720204 | 1357784 | 0 | 12 | 8 | 0 | 17 | 24 | 7772192  | 8.94E-01 | 1 |
| PRKCG    | 831741  | 360 | -41 | 1801360 | 507656  | 0 | 5  | 4 | 0 | 32 | 51 | 10483488 | 8.94E-01 | 1 |
| CHMP4B   | 761783  | 146 | 53  | 589536  | 148452  | 0 | 1  | 1 | 0 | 18 | 29 | 6608072  | 8.95E-01 | 1 |
| STK16    | 694442  | 193 | 44  | 784624  | 221432  | 0 | 1  | 1 | 0 | 50 | 75 | 22905396 | 8.95E-01 | 1 |
| C9orf91  | 285717  | 202 | 14  | 872200  | 260948  | 0 | 1  | 0 | 0 | 31 | 25 | 10464976 | 8.95E-01 | 1 |
| GNL1     | 2080582 | 271 | 32  | 1547888 | 447136  | 0 | 2  | 1 | 0 | 24 | 27 | 11479576 | 8.95E-01 | 1 |
| TAS1R2   | 636814  | 532 | 25  | 2097196 | 616592  | 0 | 4  | 4 | 0 | 24 | 51 | 14505576 | 8.95E-01 | 1 |
| SLC6A9   | 875223  | 214 | 39  | 1819516 | 539696  | 0 | 5  | 2 | 0 | 50 | 67 | 19898264 | 8.95E-01 | 1 |
| UNC93B1  | 1357582 | 356 | 31  | 1500540 | 459240  | 0 | 3  | 2 | 0 | 50 | 65 | 20667936 | 8.95E-01 | 1 |
| PDE8B    | 276128  | 451 | 26  | 2320764 | 609828  | 0 | 4  | 1 | 0 | 7  | 6  | 2434328  | 8.95E-01 | 1 |
| REXO4    | 1827885 | 416 | 28  | 1088292 | 296904  | 0 | 1  | 1 | 0 | 50 | 47 | 17145316 | 8.95E-01 | 1 |
| RAD23A   | 1886809 | 335 | 40  | 935568  | 264864  | 0 | 3  | 3 | 0 | 22 | 36 | 7729472  | 8.95E-01 | 1 |
| SLC22A7  | 1293543 | 363 | 51  | 1336068 | 463512  | 0 | 3  | 3 | 0 | 31 | 44 | 12099728 | 8.95E-01 | 1 |
| IQUB     | 89539   | 779 | -21 | 2071564 | 517268  | 0 | 5  | 2 | 0 | 50 | 67 | 19760848 | 8.95E-01 | 1 |
| PMPCA    | 1413299 | 233 | 44  | 1344968 | 395872  | 0 | 2  | 1 | 0 | 50 | 69 | 23563996 | 8.95E-01 | 1 |
| LAT2     | 997452  | 202 | 51  | 664296  | 168744  | 0 | 1  | 2 | 0 | 14 | 15 | 4682112  | 8.95E-01 | 1 |
| MYC      | 406323  | 204 | 23  | 1136352 | 330012  | 0 | 2  | 2 | 0 | 29 | 35 | 10794632 | 8.95E-01 | 1 |
| ZNF691   | 803442  | 334 | 27  | 722324  | 195088  | 0 | 2  | 1 | 0 | 4  | 8  | 1741196  | 8.95E-01 | 1 |
| CSNK1D   | 2856070 | 193 | 24  | 1096480 | 312212  | 0 | 3  | 3 | 0 | 4  | 3  | 1196516  | 8.95E-01 | 1 |
| WDR33    | 605495  | 187 | 43  | 3748324 | 1059812 | 0 | 12 | 3 | 0 | 50 | 70 | 22042452 | 8.95E-01 | 1 |
| SIPA1L2  | 94875   | 598 | -14 | 4365272 | 1240660 | 0 | 13 | 3 | 0 | 5  | 11 | 3222512  | 8.95E-01 | 1 |

|           |         |     |     |         |         |   |    |   |   |    |     |          |          |   |
|-----------|---------|-----|-----|---------|---------|---|----|---|---|----|-----|----------|----------|---|
| PDE6B     | 639827  | 489 | 12  | 2250632 | 580636  | 0 | 5  | 3 | 0 | 40 | 48  | 16311920 | 8.95E-01 | 1 |
| TBC1D24   | 2085452 | 321 | 49  | 1392672 | 403704  | 0 | 1  | 1 | 0 | 50 | 76  | 21050280 | 8.95E-01 | 1 |
| JPH4      | 1250373 | 553 | 35  | 1512288 | 520116  | 0 | 3  | 2 | 0 | 50 | 82  | 25432996 | 8.95E-01 | 1 |
| MCF2      | 68546   | NaN | -2  | 2770036 | 646496  | 0 | 7  | 2 | 0 | 3  | 2   | 1375228  | 8.95E-01 | 1 |
| MBTD1     | 787991  | 267 | -10 | 1664656 | 414740  | 0 | 6  | 0 | 0 | 20 | 25  | 6652572  | 8.95E-01 | 1 |
| WDR70     | 302307  | 592 | 15  | 1738348 | 437168  | 0 | 4  | 3 | 0 | 33 | 51  | 15660440 | 8.95E-01 | 1 |
| SLA       | NaN     | NaN | NaN | 822360  | 234960  | 0 | 1  | 0 | 0 | 50 | 116 | 39880544 | 8.96E-01 | 1 |
| SLC39A9   | 857161  | 395 | 40  | 768960  | 243504  | 0 | 1  | 1 | 0 | 50 | 64  | 20875484 | 8.96E-01 | 1 |
| C17orf104 | 1297937 | 254 | 27  | 2440380 | 642936  | 0 | 6  | 1 | 0 | 50 | 53  | 19790752 | 8.96E-01 | 1 |
| PLCH2     | 339388  | 228 | 38  | 3547540 | 1082240 | 0 | 8  | 2 | 0 | 30 | 30  | 12300512 | 8.96E-01 | 1 |
| CYP4F11   | 843515  | 575 | 12  | 1361344 | 370952  | 0 | 4  | 2 | 0 | 6  | 10  | 3199728  | 8.96E-01 | 1 |
| ANO8      | 842088  | 211 | 43  | 3057684 | 965472  | 0 | 8  | 3 | 0 | 50 | 61  | 21639816 | 8.96E-01 | 1 |
| DYNC1I1   | 184459  | 747 | -7  | 1692424 | 445712  | 0 | 2  | 1 | 0 | 5  | 8   | 2959072  | 8.96E-01 | 1 |
| MYBPHL    | 988224  | 302 | 29  | 902460  | 271272  | 0 | 1  | 0 | 0 | 27 | 37  | 12111476 | 8.96E-01 | 1 |
| PLCXD2    | 188186  | 322 | -3  | 1010684 | 286936  | 0 | 1  | 2 | 0 | 27 | 29  | 11820268 | 8.96E-01 | 1 |
| ZBTB41    | 222912  | 614 | -19 | 2379148 | 577076  | 0 | 8  | 0 | 0 | 0  | 0   | 577076   | 8.96E-01 | 1 |
| KIAA0020  | 137713  | 763 | 16  | 1728380 | 423640  | 0 | 5  | 0 | 0 | 6  | 7   | 2629416  | 8.96E-01 | 1 |
| LOXL1     | 337765  | 439 | 34  | 1419728 | 448204  | 0 | 2  | 2 | 0 | 50 | 54  | 20944548 | 8.96E-01 | 1 |
| ZNF639    | 410660  | 641 | 2   | 1282668 | 291564  | 0 | 2  | 1 | 0 | 50 | 64  | 22262104 | 8.96E-01 | 1 |
| SUSD2     | 744077  | 202 | 44  | 2077972 | 620864  | 0 | 3  | 0 | 0 | 13 | 12  | 6175888  | 8.96E-01 | 1 |
| CCBE1     | 257439  | 491 | 24  | 1048064 | 300820  | 0 | 1  | 0 | 0 | 50 | 52  | 20269216 | 8.96E-01 | 1 |
| ZNF880    | 526380  | 960 | -32 | 1498760 | 368104  | 0 | 3  | 1 | 0 | 8  | 12  | 3141700  | 8.96E-01 | 1 |
| FOXD4L6   | NaN     | NaN | NaN | 1001784 | 337488  | 0 | 1  | 0 | 0 | 50 | 116 | 39983072 | 8.96E-01 | 1 |
| FSCN1     | 1965381 | 192 | 56  | 1233540 | 366324  | 0 | 5  | 3 | 0 | 8  | 14  | 3336076  | 8.96E-01 | 1 |
| COCH      | 428678  | 454 | 11  | 1419016 | 393380  | 0 | 3  | 1 | 0 | 50 | 67  | 22131452 | 8.96E-01 | 1 |
| NDUFB10   | 1747301 | 183 | 46  | 463868  | 105376  | 0 | 1  | 2 | 0 | 6  | 6   | 1391960  | 8.96E-01 | 1 |
| RNF41     | 2878057 | 171 | 43  | 817020  | 223212  | 0 | 1  | 0 | 0 | 40 | 74  | 21948824 | 8.96E-01 | 1 |
| SEC24C    | 1009357 | 191 | 42  | 2763272 | 839092  | 0 | 8  | 3 | 0 | 2  | 4   | 1298332  | 8.96E-01 | 1 |
| LIPT1     | 504421  | 770 | 21  | 952300  | 251336  | 0 | 1  | 0 | 0 | 38 | 36  | 14850184 | 8.96E-01 | 1 |
| TXNDC2    | 431025  | 168 | 34  | 1398724 | 386972  | 0 | 3  | 0 | 0 | 20 | 32  | 9707764  | 8.96E-01 | 1 |
| GTPBP3    | 842088  | 211 | 43  | 1269140 | 445000  | 0 | 2  | 1 | 0 | 50 | 61  | 21639816 | 8.96E-01 | 1 |
| MDC1      | 2115149 | 171 | 41  | 5112516 | 1643652 | 0 | 11 | 6 | 0 | 31 | 37  | 12513044 | 8.96E-01 | 1 |
| EARS2     | 528849  | 628 | 48  | 1316488 | 398720  | 0 | 2  | 0 | 0 | 41 | 43  | 15675036 | 8.96E-01 | 1 |



|          |         |     |     |         |         |   |    |   |   |    |     |          |          |   |
|----------|---------|-----|-----|---------|---------|---|----|---|---|----|-----|----------|----------|---|
| PVR      | 749323  | 335 | -51 | 1072272 | 325740  | 0 | 4  | 0 | 0 | 2  | 2   | 835176   | 8.97E-01 | 1 |
| RRAD     | 942986  | 142 | 34  | 766112  | 245284  | 0 | 1  | 0 | 0 | 50 | 65  | 21541916 | 8.97E-01 | 1 |
| GPI      | 671792  | 292 | -2  | 1562128 | 430760  | 0 | 3  | 2 | 0 | 50 | 67  | 21104036 | 8.97E-01 | 1 |
| HSDL1    | 550248  | 435 | 13  | 842296  | 235316  | 0 | 1  | 0 | 0 | 43 | 46  | 16971944 | 8.97E-01 | 1 |
| PITPNM3  | 255838  | 313 | 8   | 2479184 | 725884  | 0 | 3  | 2 | 0 | 50 | 54  | 20769752 | 8.97E-01 | 1 |
| TOP2B    | 216871  | 636 | -6  | 4279120 | 1067288 | 0 | 6  | 2 | 0 | 7  | 15  | 7396968  | 8.97E-01 | 1 |
| PAQR8    | 372545  | 431 | 33  | 872556  | 269136  | 0 | 3  | 2 | 0 | 4  | 10  | 2361348  | 8.97E-01 | 1 |
| ANO9     | 2206786 | 344 | 58  | 2038812 | 566040  | 0 | 5  | 4 | 0 | 27 | 50  | 14299808 | 8.97E-01 | 1 |
| SLC1A1   | 228047  | 813 | 19  | 1340340 | 388752  | 0 | 3  | 2 | 0 | 5  | 3   | 1122824  | 8.97E-01 | 1 |
| ANKH     | 503265  | 410 | 8   | 1259172 | 367392  | 0 | 2  | 1 | 0 | 50 | 76  | 26025024 | 8.97E-01 | 1 |
| PCDHGA9  | NaN     | NaN | NaN | 2331088 | 735140  | 0 | 5  | 4 | 0 | 50 | 120 | 40380724 | 8.97E-01 | 1 |
| UGT1A6   | NaN     | NaN | NaN | 1349952 | 374868  | 0 | 2  | 0 | 0 | 50 | 116 | 40020452 | 8.97E-01 | 1 |
| SNX15    | 3209258 | 207 | 49  | 866148  | 264864  | 0 | 2  | 1 | 0 | 50 | 90  | 24481408 | 8.97E-01 | 1 |
| SLC25A25 | 1898149 | 195 | 32  | 1607340 | 464580  | 0 | 2  | 1 | 0 | 50 | 88  | 21996172 | 8.97E-01 | 1 |
| KLC1     | 816643  | 204 | 41  | 1687796 | 400144  | 0 | 1  | 3 | 0 | 50 | 56  | 19472844 | 8.97E-01 | 1 |
| PLEKHH3  | 1740597 | 177 | 36  | 1918128 | 677112  | 0 | 8  | 1 | 0 | 0  | 1   | 677112   | 8.97E-01 | 1 |
| ATG16L1  | 427221  | 155 | 31  | 1591676 | 428980  | 0 | 4  | 2 | 0 | 39 | 43  | 13588164 | 8.97E-01 | 1 |
| GCAT     | 1385064 | 203 | 66  | 1117840 | 351728  | 0 | 1  | 0 | 0 | 6  | 2   | 1790680  | 8.97E-01 | 1 |
| ZNF195   | 560134  | 470 | 28  | 1649348 | 390532  | 0 | 2  | 0 | 0 | 43 | 44  | 20071636 | 8.97E-01 | 1 |
| KLK3     | 655673  | 589 | 25  | 734784  | 221076  | 0 | 1  | 1 | 0 | 50 | 77  | 24644100 | 8.97E-01 | 1 |
| THAP8    | 980636  | 320 | 19  | 662160  | 231756  | 0 | 1  | 0 | 0 | 50 | 64  | 18556500 | 8.97E-01 | 1 |
| PGM2L1   | 629890  | 143 | 29  | 1625852 | 425776  | 0 | 2  | 2 | 0 | 50 | 39  | 16620216 | 8.97E-01 | 1 |
| UBIAD1   | 582356  | 524 | 31  | 817020  | 273408  | 0 | 2  | 2 | 0 | 19 | 36  | 8595264  | 8.97E-01 | 1 |
| ABCC1    | 409366  | 264 | 33  | 3912440 | 1124248 | 0 | 11 | 7 | 0 | 50 | 59  | 18384908 | 8.97E-01 | 1 |
| DUSP7    | 1045639 | 224 | 36  | 1029196 | 327164  | 0 | 3  | 4 | 0 | 17 | 18  | 4270932  | 8.97E-01 | 1 |
| SPATC1   | 2650698 | 211 | 27  | 1422932 | 493060  | 0 | 2  | 0 | 0 | 11 | 12  | 5322556  | 8.98E-01 | 1 |
| ELN      | 1047492 | 240 | 54  | 1823076 | 654684  | 0 | 6  | 1 | 0 | 10 | 25  | 6330036  | 8.98E-01 | 1 |
| B4GALT6  | 293258  | 554 | 32  | 1009260 | 252048  | 0 | 1  | 0 | 0 | 50 | 66  | 25208004 | 8.98E-01 | 1 |
| ERCC5    | 196444  | 475 | 33  | 3048784 | 816308  | 0 | 6  | 1 | 0 | 1  | 1   | 1547176  | 8.98E-01 | 1 |
| SLC6A19  | 657890  | 541 | 24  | 1613392 | 470276  | 0 | 6  | 4 | 0 | 7  | 23  | 4939856  | 8.98E-01 | 1 |
| NAP1L4   | 550048  | 221 | 38  | 1031332 | 237452  | 0 | 1  | 1 | 0 | 50 | 55  | 20617740 | 8.98E-01 | 1 |
| ACVR1C   | 79510   | 911 | 7   | 1265224 | 351728  | 0 | 2  | 1 | 0 | 50 | 56  | 19494204 | 8.98E-01 | 1 |
| IRX6     | 130838  | 706 | -26 | 1102176 | 351372  | 0 | 4  | 3 | 0 | 5  | 8   | 1938776  | 8.98E-01 | 1 |

|          |         |      |     |         |         |   |    |   |   |    |    |          |          |   |
|----------|---------|------|-----|---------|---------|---|----|---|---|----|----|----------|----------|---|
| BCL2L1   | 864206  | 213  | 21  | 585264  | 168744  | 0 | 1  | 1 | 0 | 12 | 11 | 3125324  | 8.98E-01 | 1 |
| RIMS1    | 35104   | 964  | -12 | 4474208 | 1263088 | 0 | 12 | 3 | 0 | 32 | 51 | 17702456 | 8.98E-01 | 1 |
| PRKCB    | 513265  | 610  | 21  | 1919196 | 474192  | 0 | 7  | 2 | 0 | 32 | 41 | 10903568 | 8.98E-01 | 1 |
| SFTA3    | 58829   | 624  | -18 | 246352  | 70844   | 0 | 1  | 1 | 0 | 1  | 2  | 381632   | 8.98E-01 | 1 |
| RUFY1    | 1583299 | 229  | 17  | 1857252 | 487008  | 0 | 4  | 2 | 0 | 17 | 51 | 11199760 | 8.98E-01 | 1 |
| STAG1    | 245682  | 512  | 22  | 3349248 | 825564  | 0 | 18 | 5 | 0 | 2  | 7  | 1961204  | 8.98E-01 | 1 |
| EIF2B3   | 839426  | 185  | 24  | 1211824 | 323960  | 0 | 1  | 0 | 0 | 21 | 12 | 6622668  | 8.98E-01 | 1 |
| EXT2     | 291324  | 616  | 7   | 2019232 | 551444  | 0 | 2  | 2 | 0 | 50 | 65 | 22851284 | 8.98E-01 | 1 |
| ZBED4    | 700457  | 276  | -4  | 2906740 | 848348  | 0 | 8  | 4 | 0 | 50 | 67 | 21014680 | 8.98E-01 | 1 |
| EDA2R    | 28261   | NaN  | -6  | 770740  | 207548  | 0 | 1  | 0 | 0 | 50 | 70 | 21390972 | 8.98E-01 | 1 |
| DPCR1    | 2483101 | 261  | 36  | 3396596 | 1078324 | 0 | 1  | 0 | 0 | 9  | 0  | 2968328  | 8.98E-01 | 1 |
| FEZF2    | 213716  | 935  | -3  | 1140268 | 350660  | 0 | 2  | 1 | 0 | 50 | 69 | 21505960 | 8.98E-01 | 1 |
| TSPAN33  | 787448  | 408  | 51  | 733360  | 206480  | 0 | 1  | 1 | 0 | 50 | 85 | 25701064 | 8.98E-01 | 1 |
| NLRC3    | 775547  | 224  | 39  | 2644012 | 845144  | 0 | 5  | 1 | 0 | 5  | 4  | 2473132  | 8.98E-01 | 1 |
| C8orf74  | 110362  | 481  | 9   | 741548  | 218584  | 0 | 3  | 3 | 0 | 11 | 22 | 4377376  | 8.98E-01 | 1 |
| ANKRD6   | 403943  | 609  | 43  | 1845148 | 531152  | 0 | 4  | 1 | 0 | 50 | 65 | 20118272 | 8.98E-01 | 1 |
| NEK7     | 114791  | 402  | -13 | 808476  | 200784  | 0 | 4  | 1 | 0 | 1  | 1  | 528304   | 8.99E-01 | 1 |
| CCDC150  | 165315  | 393  | 3   | 2946256 | 699896  | 0 | 3  | 0 | 0 | 15 | 10 | 7212916  | 8.99E-01 | 1 |
| FYB      | 171734  | 367  | -6  | 2165904 | 570312  | 0 | 4  | 1 | 0 | 35 | 31 | 14601696 | 8.99E-01 | 1 |
| COL17A1  | 455010  | 271  | 19  | 3872924 | 1161628 | 0 | 7  | 3 | 0 | 31 | 44 | 14032452 | 8.99E-01 | 1 |
| USP11    | 807577  | NaN  | 47  | 2483456 | 690640  | 0 | 5  | 4 | 0 | 18 | 18 | 7274148  | 8.99E-01 | 1 |
| SEC24B   | 202883  | 438  | 21  | 3227496 | 938772  | 0 | 8  | 2 | 0 | 24 | 34 | 10648316 | 8.99E-01 | 1 |
| PLD1     | 180676  | 440  | 23  | 2841236 | 714136  | 0 | 7  | 4 | 0 | 23 | 27 | 8577820  | 8.99E-01 | 1 |
| BEND3    | 208838  | 417  | 30  | 2068004 | 600928  | 0 | 8  | 0 | 0 | 2  | 5  | 1715564  | 8.99E-01 | 1 |
| WDR81    | 1447501 | 189  | 32  | 4768264 | 1558568 | 0 | 7  | 3 | 0 | 4  | 4  | 3275200  | 8.99E-01 | 1 |
| PTGES2   | 1898149 | 195  | 32  | 945180  | 291564  | 0 | 2  | 2 | 0 | 50 | 88 | 21996172 | 8.99E-01 | 1 |
| ZNF677   | 427680  | 921  | -46 | 1534716 | 352440  | 0 | 4  | 0 | 0 | 36 | 51 | 13351780 | 8.99E-01 | 1 |
| DLC1     | 73786   | 559  | -28 | 3961568 | 1092208 | 0 | 15 | 6 | 0 | 50 | 94 | 20608484 | 8.99E-01 | 1 |
| NOM1     | 386240  | 474  | 22  | 2194028 | 609472  | 0 | 9  | 1 | 0 | 3  | 8  | 2335360  | 8.99E-01 | 1 |
| C16orf59 | 2085452 | 321  | 49  | 1073340 | 357780  | 0 | 2  | 2 | 0 | 50 | 76 | 21050280 | 8.99E-01 | 1 |
| HNRNPR   | 1032187 | 163  | 25  | 1644008 | 439660  | 0 | 4  | 1 | 0 | 50 | 98 | 21204072 | 8.99E-01 | 1 |
| COLEC12  | 587478  | 572  | 14  | 1898192 | 520828  | 0 | 3  | 2 | 0 | 36 | 45 | 12892540 | 8.99E-01 | 1 |
| WBSCR17  | 38269   | 1094 | -34 | 1525816 | 436100  | 0 | 6  | 1 | 0 | 7  | 10 | 2347820  | 8.99E-01 | 1 |

|          |         |      |    |         |        |   |    |   |   |    |    |          |          |   |
|----------|---------|------|----|---------|--------|---|----|---|---|----|----|----------|----------|---|
| TMCC3    | 242132  | 576  | 26 | 1206840 | 337488 | 0 | 4  | 2 | 0 | 4  | 4  | 1510152  | 8.99E-01 | 1 |
| CYFIP2   | 266925  | 1129 | 33 | 3285880 | 860096 | 0 | 7  | 0 | 0 | 3  | 1  | 1440732  | 8.99E-01 | 1 |
| AGXT2    | 243997  | 675  | 23 | 1342120 | 363476 | 0 | 2  | 2 | 0 | 37 | 36 | 14953780 | 8.99E-01 | 1 |
| DHX16    | 2115149 | 171  | 41 | 2663236 | 791744 | 0 | 7  | 0 | 0 | 3  | 8  | 3342128  | 8.99E-01 | 1 |
| GSG1L    | 592259  | 575  | 10 | 849416  | 242080 | 0 | 2  | 0 | 0 | 50 | 69 | 20967688 | 9.00E-01 | 1 |
| PAN2     | 2869106 | 184  | 52 | 3096844 | 860096 | 0 | 14 | 7 | 0 | 5  | 14 | 3286236  | 9.00E-01 | 1 |
| DDRGK1   | 909603  | 255  | 55 | 806696  | 238876 | 0 | 1  | 2 | 0 | 38 | 44 | 13303008 | 9.00E-01 | 1 |
| LZTS2    | 1020226 | 247  | 40 | 1602712 | 561056 | 0 | 3  | 2 | 0 | 50 | 62 | 20159924 | 9.00E-01 | 1 |
| MRPL22   | 516166  | 461  | 38 | 548952  | 142044 | 0 | 1  | 2 | 0 | 16 | 22 | 5399452  | 9.00E-01 | 1 |
| GZMH     | 897577  | 582  | 3  | 629408  | 181204 | 0 | 1  | 0 | 0 | 50 | 79 | 22165272 | 9.00E-01 | 1 |
| WDR77    | 397926  | 461  | 18 | 885372  | 254184 | 0 | 1  | 1 | 0 | 50 | 56 | 21248572 | 9.00E-01 | 1 |
| LCORL    | 271221  | 1064 | 26 | 1694560 | 458528 | 0 | 1  | 0 | 0 | 50 | 30 | 21937076 | 9.00E-01 | 1 |
| TMEM45B  | 632501  | 231  | -2 | 713780  | 191884 | 0 | 1  | 1 | 0 | 50 | 67 | 20666512 | 9.00E-01 | 1 |
| CDK5R1   | 636808  | 587  | 14 | 748668  | 238164 | 0 | 1  | 2 | 0 | 19 | 22 | 7552184  | 9.00E-01 | 1 |
| SNX27    | 1294954 | 173  | 29 | 1376652 | 367392 | 0 | 4  | 0 | 0 | 11 | 25 | 5995752  | 9.00E-01 | 1 |
| MYO1H    | 438867  | 470  | 39 | 2709516 | 696336 | 0 | 5  | 2 | 0 | 50 | 70 | 21741988 | 9.00E-01 | 1 |
| ZNF660   | 435137  | 541  | 40 | 855112  | 208616 | 0 | 1  | 0 | 0 | 50 | 60 | 18467144 | 9.00E-01 | 1 |
| DCST2    | 1654795 | 214  | 40 | 1949456 | 596656 | 0 | 5  | 4 | 0 | 50 | 87 | 24762648 | 9.00E-01 | 1 |
| FUT11    | 1009357 | 191  | 42 | 1216096 | 374156 | 0 | 2  | 0 | 0 | 5  | 12 | 4589196  | 9.00E-01 | 1 |
| GPRC5B   | 258899  | 641  | 9  | 988968  | 317196 | 0 | 1  | 0 | 0 | 50 | 53 | 21947756 | 9.00E-01 | 1 |
| HAUS1    | 396070  | 187  | 62 | 741904  | 188324 | 0 | 1  | 0 | 0 | 50 | 78 | 22105820 | 9.00E-01 | 1 |
| PLCD4    | 986502  | 179  | 45 | 1987904 | 520828 | 0 | 4  | 1 | 0 | 10 | 9  | 3842308  | 9.00E-01 | 1 |
| ARVELD   | 446645  | 530  | 10 | 1503744 | 478464 | 0 | 3  | 2 | 0 | 50 | 64 | 19453620 | 9.00E-01 | 1 |
| KDM4B    | 993857  | 258  | 26 | 2792464 | 812036 | 0 | 3  | 2 | 0 | 50 | 51 | 20205136 | 9.00E-01 | 1 |
| EEF2     | 2173603 | 207  | 30 | 2187620 | 626560 | 0 | 4  | 5 | 0 | 33 | 49 | 14189804 | 9.00E-01 | 1 |
| CHRD1    | 108458  | NaN  | 14 | 1218944 | 298684 | 0 | 2  | 0 | 0 | 30 | 47 | 15672544 | 9.00E-01 | 1 |
| TIFA     | 182788  | 351  | 37 | 478464  | 118548 | 0 | 1  | 1 | 0 | 7  | 11 | 2551096  | 9.00E-01 | 1 |
| MAGT1    | 549266  | NaN  | 20 | 962624  | 257032 | 0 | 2  | 0 | 0 | 19 | 32 | 7840900  | 9.01E-01 | 1 |
| MEM185A  | 206117  | NaN  | 9  | 898900  | 251336 | 0 | 1  | 1 | 0 | 50 | 63 | 23523768 | 9.01E-01 | 1 |
| TM7SF3   | 408250  | 320  | 26 | 1462448 | 414028 | 0 | 2  | 0 | 0 | 18 | 19 | 8077640  | 9.01E-01 | 1 |
| PGC      | 429684  | 341  | 47 | 1247068 | 363476 | 0 | 2  | 2 | 0 | 50 | 57 | 19608480 | 9.01E-01 | 1 |
| HNRNPM   | 726124  | 214  | 1  | 1893564 | 514776 | 0 | 2  | 3 | 0 | 50 | 67 | 22455056 | 9.01E-01 | 1 |
| PAFAH1B1 | 612041  | 184  | 14 | 1078324 | 276968 | 0 | 1  | 0 | 0 | 50 | 48 | 19587120 | 9.01E-01 | 1 |

|           |         |      |     |         |         |   |    |    |   |    |     |          |          |   |
|-----------|---------|------|-----|---------|---------|---|----|----|---|----|-----|----------|----------|---|
| LONP2     | 200017  | 467  | -14 | 2163412 | 631544  | 0 | 6  | 5  | 0 | 30 | 33  | 9936672  | 9.01E-01 | 1 |
| TAPT1     | 165112  | 581  | 29  | 1481316 | 396228  | 0 | 2  | 1  | 0 | 50 | 55  | 21676484 | 9.01E-01 | 1 |
| RGPD3     | NaN     | NaN  | NaN | 4532592 | 1199364 | 0 | 13 | 2  | 0 | 9  | 18  | 5556804  | 9.01E-01 | 1 |
| TBX19     | 410552  | 299  | 20  | 1134928 | 335708  | 0 | 4  | 1  | 0 | 4  | 11  | 2765052  | 9.01E-01 | 1 |
| OS9       | 1245394 | 344  | 46  | 1728736 | 471344  | 0 | 3  | 2  | 0 | 32 | 63  | 15576424 | 9.01E-01 | 1 |
| MTUS2     | 267724  | 784  | -5  | 3521552 | 1017448 | 0 | 8  | 3  | 0 | 5  | 6   | 3202932  | 9.01E-01 | 1 |
| SLC18A1   | 158991  | 511  | -4  | 1368108 | 377004  | 0 | 1  | 0  | 0 | 3  | 0   | 1182632  | 9.01E-01 | 1 |
| GLRA4     | 485629  | NaN  | 43  | 1250628 | 328944  | 0 | 1  | 1  | 0 | 50 | 50  | 18367108 | 9.01E-01 | 1 |
| VWA3A     | 577505  | 269  | 45  | 3136004 | 803848  | 0 | 6  | 1  | 0 | 15 | 16  | 7625876  | 9.01E-01 | 1 |
| TLE2      | 1106128 | 195  | 32  | 1968680 | 573160  | 0 | 4  | 3  | 0 | 50 | 69  | 18666504 | 9.01E-01 | 1 |
| FBLN2     | 375523  | 199  | 36  | 2059460 | 559276  | 0 | 5  | 1  | 0 | 27 | 34  | 11735540 | 9.01E-01 | 1 |
| RFX2      | 1209062 | 392  | 33  | 1859388 | 532932  | 0 | 2  | 1  | 0 | 17 | 18  | 6366704  | 9.01E-01 | 1 |
| TSSK1B    | 267968  | 620  | 13  | 915988  | 263084  | 0 | 3  | 2  | 0 | 16 | 26  | 5661824  | 9.01E-01 | 1 |
| ITGA10    | NaN     | NaN  | NaN | 2959072 | 909224  | 0 | 5  | 2  | 0 | 50 | 118 | 40554808 | 9.01E-01 | 1 |
| NGEF      | 404109  | 215  | 33  | 1933436 | 520828  | 0 | 3  | 1  | 0 | 42 | 39  | 16643000 | 9.01E-01 | 1 |
| MLLT10    | 128481  | 488  | 16  | 2650420 | 739412  | 0 | 6  | 0  | 0 | 8  | 8   | 3453556  | 9.01E-01 | 1 |
| HOXD8     | 242935  | 874  | 15  | 724460  | 212176  | 0 | 1  | 1  | 0 | 50 | 65  | 19479964 | 9.01E-01 | 1 |
| OMG       | 473619  | 396  | 27  | 1100396 | 316840  | 0 | 3  | 2  | 0 | 9  | 18  | 4624440  | 9.01E-01 | 1 |
| WDR60     | 338838  | 241  | 3   | 2801720 | 719476  | 0 | 5  | 2  | 0 | 50 | 54  | 22811412 | 9.01E-01 | 1 |
| PRF1      | 549339  | 573  | 40  | 1355292 | 438948  | 0 | 5  | 3  | 0 | 4  | 6   | 1783916  | 9.01E-01 | 1 |
| MDFIC     | 38349   | 520  | 15  | 922040  | 278392  | 0 | 1  | 0  | 0 | 50 | 54  | 21535152 | 9.01E-01 | 1 |
| TMEFF2    | 69320   | 677  | 0   | 996088  | 243860  | 0 | 6  | 3  | 0 | 2  | 5   | 1026348  | 9.01E-01 | 1 |
| OR8A1     | 171574  | 746  | -1  | 804560  | 242080  | 0 | 4  | 2  | 0 | 6  | 10  | 1750808  | 9.01E-01 | 1 |
| ZNF619    | 195638  | 546  | 22  | 1599152 | 422572  | 0 | 2  | 2  | 0 | 50 | 48  | 20952736 | 9.01E-01 | 1 |
| OR5F1     | 4262    | 1044 | -40 | 772520  | 235672  | 0 | 4  | 2  | 0 | 5  | 12  | 1863660  | 9.02E-01 | 1 |
| IIST2H2BI | 462959  | 519  | 19  | 673196  | 203632  | 0 | 1  | 2  | 0 | 14 | 13  | 3281608  | 9.02E-01 | 1 |
| APOL1     | 1237332 | 331  | 42  | 1058388 | 296904  | 0 | 3  | 2  | 0 | 8  | 28  | 6483472  | 9.02E-01 | 1 |
| RALGAPB   | 531076  | 440  | 45  | 3851920 | 1061948 | 0 | 11 | 4  | 0 | 4  | 7   | 2477760  | 9.02E-01 | 1 |
| KNG1      | 463823  | 395  | 37  | 1739060 | 454612  | 0 | 4  | 1  | 0 | 50 | 74  | 23993688 | 9.02E-01 | 1 |
| TMEM135   | 159214  | 587  | -7  | 1212892 | 317552  | 0 | 2  | 1  | 0 | 50 | 66  | 21158148 | 9.02E-01 | 1 |
| NUP210    | 359039  | 285  | 48  | 4756516 | 1461380 | 0 | 13 | 10 | 0 | 22 | 26  | 9351764  | 9.02E-01 | 1 |
| MUTYH     | 1002765 | 249  | 29  | 1449632 | 434320  | 0 | 2  | 0  | 0 | 49 | 55  | 22400232 | 9.02E-01 | 1 |
| TMEM171   | 447937  | 584  | 21  | 808832  | 247420  | 0 | 1  | 1  | 0 | 50 | 58  | 20189472 | 9.02E-01 | 1 |

|         |         |      |     |          |         |   |    |    |   |    |    |          |          |   |
|---------|---------|------|-----|----------|---------|---|----|----|---|----|----|----------|----------|---|
| SEMA7A  | 640438  | 204  | 54  | 1707732  | 489144  | 0 | 3  | 1  | 0 | 34 | 37 | 15457164 | 9.02E-01 | 1 |
| XRCC5   | 597243  | 384  | 33  | 1952304  | 481668  | 0 | 1  | 1  | 0 | 20 | 20 | 8441828  | 9.02E-01 | 1 |
| PLCH1   | 326198  | 765  | -9  | 4363848  | 1175868 | 0 | 11 | 6  | 0 | 20 | 28 | 8470664  | 9.02E-01 | 1 |
| CNTN5   | 3647    | 1135 | -26 | 2834116  | 791744  | 0 | 12 | 5  | 0 | 24 | 57 | 10123572 | 9.02E-01 | 1 |
| SLC22A3 | 545081  | 363  | -12 | 1394452  | 435032  | 0 | 2  | 2  | 0 | 50 | 55 | 20845580 | 9.02E-01 | 1 |
| RPS6KA4 | 1610483 | 257  | 51  | 1939132  | 608048  | 0 | 3  | 1  | 0 | 40 | 75 | 19957360 | 9.02E-01 | 1 |
| UBE2Z   | 775532  | 169  | 29  | 901748   | 263440  | 0 | 1  | 0  | 0 | 50 | 61 | 22704256 | 9.02E-01 | 1 |
| MTA3    | 343875  | 378  | 27  | 1364548  | 346388  | 0 | 1  | 0  | 0 | 50 | 42 | 24595684 | 9.02E-01 | 1 |
| ICK     | 463740  | 386  | 22  | 1630836  | 448560  | 0 | 2  | 2  | 0 | 50 | 53 | 22580724 | 9.02E-01 | 1 |
| LRP1B   | 8988    | 1120 | -11 | 12201188 | 2921692 | 0 | 48 | 12 | 0 | 33 | 57 | 18501676 | 9.02E-01 | 1 |
| CCDC74B | 348702  | 548  | 13  | 964760   | 288004  | 0 | 1  | 0  | 0 | 50 | 61 | 19664372 | 9.02E-01 | 1 |
| MAPK13  | 855485  | 410  | 35  | 965472   | 256320  | 0 | 1  | 0  | 0 | 50 | 54 | 22437968 | 9.02E-01 | 1 |
| PRPF4   | 426351  | 312  | 26  | 1368108  | 365256  | 0 | 3  | 0  | 0 | 12 | 15 | 4898560  | 9.03E-01 | 1 |
| EIF3B   | 795806  | 251  | 43  | 2139204  | 551088  | 0 | 5  | 1  | 0 | 16 | 26 | 6910672  | 9.03E-01 | 1 |
| OR12D3  | 329776  | 872  | 7   | 786760   | 231044  | 0 | 1  | 1  | 0 | 50 | 77 | 21945976 | 9.03E-01 | 1 |
| PCCA    | 139575  | 733  | 33  | 1920976  | 512996  | 0 | 4  | 0  | 0 | 14 | 15 | 6308320  | 9.03E-01 | 1 |
| SPNS3   | 1297591 | 273  | 30  | 1275904  | 416876  | 0 | 2  | 0  | 0 | 27 | 36 | 12283780 | 9.03E-01 | 1 |
| SCFD2   | 170883  | 852  | 18  | 1707732  | 521184  | 0 | 3  | 3  | 0 | 11 | 10 | 4043804  | 9.03E-01 | 1 |
| GATA1   | 823539  | NaN  | 29  | 1000716  | 347100  | 0 | 2  | 2  | 0 | 50 | 93 | 24512736 | 9.03E-01 | 1 |
| RNF130  | 1665304 | 424  | 17  | 1072984  | 306872  | 0 | 2  | 0  | 0 | 29 | 58 | 16958060 | 9.03E-01 | 1 |
| COQ10A  | 2878071 | 171  | 46  | 657888   | 198648  | 0 | 1  | 0  | 0 | 33 | 67 | 18798224 | 9.03E-01 | 1 |
| TRIM32  | 68232   | 682  | -15 | 1605916  | 496976  | 0 | 5  | 2  | 0 | 21 | 37 | 9152760  | 9.03E-01 | 1 |
| LRIG3   | 21039   | 678  | -29 | 2925252  | 804204  | 0 | 8  | 0  | 0 | 0  | 0  | 804204   | 9.03E-01 | 1 |
| OR51A2  | 65798   | 1006 | -15 | 771096   | 232824  | 0 | 1  | 1  | 0 | 47 | 66 | 18360344 | 9.03E-01 | 1 |
| TLR4    | 58763   | 944  | -8  | 2117488  | 582416  | 0 | 6  | 5  | 0 | 3  | 7  | 1508728  | 9.03E-01 | 1 |
| GATAD2A | 899226  | 214  | 6   | 1577792  | 500536  | 0 | 5  | 6  | 0 | 12 | 14 | 3559288  | 9.03E-01 | 1 |
| CCDC59  | 53465   | 1263 | -24 | 639376   | 150944  | 0 | 1  | 1  | 0 | 25 | 36 | 8963724  | 9.03E-01 | 1 |
| AARS    | 1335968 | 139  | 42  | 2487372  | 702744  | 0 | 5  | 4  | 0 | 50 | 76 | 22539428 | 9.03E-01 | 1 |
| ADH5    | 192327  | 549  | 11  | 966896   | 270916  | 0 | 1  | 0  | 0 | 50 | 55 | 22804648 | 9.03E-01 | 1 |
| ETV7    | 942911  | 192  | 46  | 881456   | 244216  | 0 | 2  | 1  | 0 | 2  | 5  | 1095412  | 9.03E-01 | 1 |
| PANX3   | 171574  | 746  | -1  | 972592   | 299396  | 0 | 3  | 2  | 0 | 6  | 10 | 1750808  | 9.03E-01 | 1 |
| FAM117A | 993241  | 361  | 26  | 1121044  | 365612  | 0 | 2  | 0  | 0 | 5  | 6  | 2347464  | 9.03E-01 | 1 |
| UGGT2   | 175188  | 834  | 34  | 4029564  | 993240  | 0 | 11 | 4  | 0 | 40 | 52 | 17438660 | 9.03E-01 | 1 |

|          |         |      |     |         |        |   |    |   |   |    |     |          |          |   |
|----------|---------|------|-----|---------|--------|---|----|---|---|----|-----|----------|----------|---|
| ACTB     | 1906749 | 195  | 34  | 951232  | 274832 | 0 | 17 | 4 | 0 | 0  | 4   | 274832   | 9.03E-01 | 1 |
| CNTNAP3  | 51498   | 1010 | -36 | 3277692 | 950520 | 0 | 8  | 0 | 0 | 3  | 3   | 2091500  | 9.03E-01 | 1 |
| GPRASP2  | 123687  | NaN  | 23  | 2101112 | 587044 | 0 | 3  | 0 | 0 | 22 | 14  | 7859768  | 9.03E-01 | 1 |
| PRSS27   | 1803069 | 200  | 47  | 736208  | 217516 | 0 | 1  | 1 | 0 | 50 | 64  | 19321900 | 9.03E-01 | 1 |
| MAMDC4   | 1921909 | 176  | 44  | 2878972 | 880388 | 0 | 6  | 4 | 0 | 50 | 56  | 20791468 | 9.03E-01 | 1 |
| SIRT4    | 1621662 | 187  | 56  | 785692  | 235316 | 0 | 1  | 0 | 0 | 50 | 72  | 23682188 | 9.03E-01 | 1 |
| RNMT     | 142674  | 697  | 42  | 1276972 | 294056 | 0 | 2  | 0 | 0 | 50 | 65  | 20366048 | 9.03E-01 | 1 |
| DNAJC22  | 2137968 | 175  | 37  | 834820  | 265220 | 0 | 1  | 0 | 0 | 50 | 68  | 23225440 | 9.03E-01 | 1 |
| PARP11   | 273563  | 859  | 31  | 915632  | 200428 | 0 | 1  | 0 | 0 | 50 | 70  | 26185936 | 9.04E-01 | 1 |
| EML2     | 950605  | 194  | 45  | 1675692 | 485940 | 0 | 7  | 0 | 0 | 0  | 0   | 485940   | 9.04E-01 | 1 |
| SLC25A28 | 383678  | 436  | 18  | 900680  | 281596 | 0 | 1  | 2 | 0 | 50 | 57  | 21945264 | 9.04E-01 | 1 |
| PPM1L    | 585349  | 509  | -5  | 922396  | 249200 | 0 | 2  | 2 | 0 | 50 | 74  | 18195872 | 9.04E-01 | 1 |
| BRCC3    | NaN     | NaN  | NaN | 851196  | 213600 | 0 | 1  | 0 | 0 | 50 | 116 | 39859184 | 9.04E-01 | 1 |
| ADAMTS6  | 275284  | 480  | 5   | 2941628 | 738700 | 0 | 6  | 1 | 0 | 6  | 10  | 3200440  | 9.04E-01 | 1 |
| SGCB     | 114535  | 815  | 8   | 830904  | 214668 | 0 | 1  | 0 | 0 | 50 | 63  | 22288804 | 9.04E-01 | 1 |
| CALB1    | 272948  | 534  | 25  | 715204  | 166964 | 0 | 4  | 2 | 0 | 4  | 12  | 1651484  | 9.04E-01 | 1 |
| NFASC    | 388939  | 440  | 33  | 3545404 | 989324 | 0 | 8  | 6 | 0 | 9  | 12  | 4514436  | 9.04E-01 | 1 |
| PARP1    | 805195  | 409  | 9   | 2654692 | 691352 | 0 | 9  | 2 | 0 | 13 | 13  | 3997524  | 9.04E-01 | 1 |
| ISX      | 234416  | 597  | -76 | 614456  | 186544 | 0 | 1  | 0 | 0 | 49 | 107 | 27622752 | 9.04E-01 | 1 |
| JAKMIP3  | 146849  | 592  | -12 | 2216456 | 580636 | 0 | 3  | 1 | 0 | 49 | 50  | 22022516 | 9.04E-01 | 1 |
| ADIPOR2  | 259057  | 403  | 29  | 1001072 | 268780 | 0 | 1  | 1 | 0 | 50 | 63  | 26825668 | 9.04E-01 | 1 |
| ZNF766   | 495542  | 909  | -36 | 1220724 | 296904 | 0 | 2  | 1 | 0 | 50 | 69  | 18343256 | 9.04E-01 | 1 |
| STRN     | 580141  | 370  | 0   | 2043084 | 534000 | 0 | 4  | 0 | 0 | 50 | 49  | 20006132 | 9.04E-01 | 1 |
| TFF1     | 313101  | 464  | 90  | 222500  | 60520  | 0 | 1  | 1 | 0 | 3  | 3   | 451764   | 9.04E-01 | 1 |
| TNFRSF19 | 181889  | 614  | 32  | 1097904 | 306516 | 0 | 1  | 1 | 0 | 42 | 40  | 15676104 | 9.04E-01 | 1 |
| ARHGEF4  | 547548  | 369  | 13  | 1860100 | 501248 | 0 | 3  | 4 | 0 | 13 | 21  | 6063748  | 9.04E-01 | 1 |
| HSD17B14 | 1766061 | 211  | 34  | 679604  | 222856 | 0 | 1  | 2 | 0 | 5  | 6   | 2154868  | 9.04E-01 | 1 |
| CACNG6   | 806175  | 338  | -40 | 629764  | 219296 | 0 | 1  | 1 | 0 | 50 | 83  | 19101180 | 9.04E-01 | 1 |
| STK35    | 505026  | 539  | 32  | 1301892 | 425064 | 0 | 2  | 2 | 0 | 50 | 62  | 21344336 | 9.04E-01 | 1 |
| SPOCD1   | 1213493 | 183  | 35  | 3010692 | 952656 | 0 | 5  | 2 | 0 | 29 | 24  | 12224684 | 9.04E-01 | 1 |
| FAM187B  | 767246  | 472  | 7   | 925600  | 268424 | 0 | 1  | 0 | 0 | 50 | 41  | 16380272 | 9.04E-01 | 1 |
| ALDH1L1  | 203027  | 610  | 30  | 2324324 | 662872 | 0 | 3  | 0 | 0 | 11 | 9   | 5231776  | 9.04E-01 | 1 |
| FIGNL1   | 177267  | 585  | 25  | 1686372 | 480600 | 0 | 2  | 1 | 0 | 44 | 38  | 18149592 | 9.05E-01 | 1 |

|          |         |     |     |         |        |   |   |   |   |    |    |          |          |   |
|----------|---------|-----|-----|---------|--------|---|---|---|---|----|----|----------|----------|---|
| WDR4     | 439191  | 276 | 57  | 1069068 | 303312 | 0 | 1 | 1 | 0 | 50 | 47 | 17637664 | 9.05E-01 | 1 |
| MFN2     | 518052  | 207 | 39  | 1968680 | 532576 | 0 | 5 | 4 | 0 | 42 | 44 | 13163456 | 9.05E-01 | 1 |
| KHSRP    | 865106  | 219 | 33  | 1821652 | 540764 | 0 | 2 | 0 | 0 | 14 | 12 | 6196180  | 9.05E-01 | 1 |
| BHLHB9   | 162942  | NaN | 27  | 1371312 | 384480 | 0 | 2 | 2 | 0 | 19 | 27 | 10235356 | 9.05E-01 | 1 |
| FANCG    | 782447  | 350 | 42  | 1562484 | 489144 | 0 | 2 | 1 | 0 | 36 | 48 | 20387764 | 9.05E-01 | 1 |
| PEX14    | 819616  | 392 | 27  | 970812  | 276612 | 0 | 1 | 1 | 0 | 50 | 67 | 27507052 | 9.05E-01 | 1 |
| PDE3B    | 364855  | 539 | -14 | 2824860 | 805272 | 0 | 9 | 4 | 0 | 9  | 25 | 7174112  | 9.05E-01 | 1 |
| FBP2     | 261413  | 427 | 41  | 859740  | 257388 | 0 | 1 | 1 | 0 | 50 | 80 | 21776876 | 9.05E-01 | 1 |
| CNKSR1   | 896535  | 217 | 30  | 1828060 | 547172 | 0 | 4 | 3 | 0 | 50 | 84 | 26408792 | 9.05E-01 | 1 |
| TMEM199  | 1405196 | 214 | 10  | 527948  | 167320 | 0 | 1 | 2 | 0 | 27 | 46 | 10403388 | 9.05E-01 | 1 |
| ST3GAL1  | 198193  | 357 | 24  | 874336  | 243860 | 0 | 2 | 2 | 0 | 2  | 3  | 800644   | 9.05E-01 | 1 |
| DRD3     | 418141  | 589 | 23  | 1007836 | 304736 | 0 | 1 | 1 | 0 | 50 | 51 | 21092644 | 9.05E-01 | 1 |
| IFT81    | 1034390 | 181 | 52  | 1915636 | 447848 | 0 | 6 | 2 | 0 | 33 | 46 | 12832732 | 9.05E-01 | 1 |
| GSDMB    | 1602321 | 292 | 18  | 1090784 | 292276 | 0 | 1 | 1 | 0 | 4  | 3  | 1229624  | 9.05E-01 | 1 |
| FCGR2B   | 598281  | 504 | 20  | 810612  | 217872 | 0 | 1 | 0 | 0 | 50 | 64 | 18701036 | 9.05E-01 | 1 |
| FITM2    | 813168  | 376 | 10  | 656108  | 195088 | 0 | 1 | 0 | 0 | 50 | 60 | 16040648 | 9.05E-01 | 1 |
| FBXO24   | 1651125 | 242 | 60  | 1597016 | 470632 | 0 | 2 | 3 | 0 | 46 | 58 | 16249976 | 9.05E-01 | 1 |
| ADCY9    | 740126  | 140 | 19  | 3390900 | 990036 | 0 | 7 | 1 | 0 | 34 | 37 | 14687848 | 9.05E-01 | 1 |
| VAX2     | 504483  | 623 | 25  | 694912  | 248132 | 0 | 3 | 0 | 0 | 4  | 3  | 825208   | 9.05E-01 | 1 |
| ITGB3BP  | 130856  | 477 | 5   | 497332  | 108224 | 0 | 2 | 1 | 0 | 7  | 7  | 1190108  | 9.05E-01 | 1 |
| C1GALT1  | 357040  | 748 | 14  | 945180  | 233892 | 0 | 1 | 1 | 0 | 50 | 59 | 20500616 | 9.05E-01 | 1 |
| VPS36    | 365031  | 318 | 37  | 1032756 | 264864 | 0 | 1 | 1 | 0 | 50 | 49 | 21269576 | 9.05E-01 | 1 |
| OPRL1    | 1032302 | 312 | 51  | 898900  | 302600 | 0 | 2 | 3 | 0 | 22 | 39 | 8929904  | 9.06E-01 | 1 |
| ANKRD44  | 744603  | 444 | 27  | 2411544 | 642936 | 0 | 4 | 3 | 0 | 50 | 55 | 21454696 | 9.06E-01 | 1 |
| TCEANC   | 138133  | NaN | 57  | 975796  | 256676 | 0 | 1 | 0 | 0 | 50 | 58 | 23047796 | 9.06E-01 | 1 |
| RASSF6   | 351984  | 573 | 28  | 995732  | 234604 | 0 | 3 | 2 | 0 | 5  | 7  | 1863660  | 9.06E-01 | 1 |
| ENDOD1   | 273779  | 513 | 16  | 1229980 | 379496 | 0 | 2 | 1 | 0 | 50 | 67 | 22599236 | 9.06E-01 | 1 |
| HLA-DPB1 | 1479000 | 431 | 28  | 661448  | 191884 | 0 | 1 | 0 | 0 | 50 | 69 | 17902884 | 9.06E-01 | 1 |
| RPUSD2   | 892776  | 192 | 48  | 1336068 | 421860 | 0 | 2 | 0 | 0 | 4  | 12 | 4703116  | 9.06E-01 | 1 |
| PARP3    | 1013177 | 370 | 39  | 1403708 | 376648 | 0 | 2 | 2 | 0 | 50 | 85 | 19762272 | 9.06E-01 | 1 |
| NOXA1    | 1591716 | 213 | 30  | 1221080 | 389464 | 0 | 2 | 1 | 0 | 50 | 64 | 20302324 | 9.06E-01 | 1 |
| PLK1     | 530660  | 509 | 35  | 1525104 | 450696 | 0 | 4 | 2 | 0 | 50 | 89 | 25757312 | 9.06E-01 | 1 |
| SP3      | 296444  | 376 | 27  | 1946608 | 584552 | 0 | 2 | 3 | 0 | 50 | 42 | 22176664 | 9.06E-01 | 1 |

|          |         |      |     |         |         |   |    |   |   |    |    |          |          |   |
|----------|---------|------|-----|---------|---------|---|----|---|---|----|----|----------|----------|---|
| ADCK2    | 354697  | 567  | 38  | 1530800 | 508012  | 0 | 2  | 1 | 0 | 50 | 48 | 20059176 | 9.06E-01 | 1 |
| MEM179I  | 2405109 | 248  | 44  | 545392  | 180848  | 0 | 2  | 3 | 0 | 5  | 10 | 1698832  | 9.06E-01 | 1 |
| TULP2    | 1846623 | 211  | 38  | 1346748 | 374868  | 0 | 2  | 1 | 0 | 50 | 62 | 21964132 | 9.06E-01 | 1 |
| BMP1     | 587455  | 196  | 50  | 2635468 | 702032  | 0 | 4  | 3 | 0 | 42 | 48 | 15501664 | 9.06E-01 | 1 |
| ATG16L2  | 528497  | 281  | 50  | 1588116 | 473124  | 0 | 1  | 1 | 0 | 50 | 37 | 16556492 | 9.06E-01 | 1 |
| CHAD     | 1332860 | 200  | 23  | 890356  | 278036  | 0 | 2  | 2 | 0 | 8  | 12 | 3275556  | 9.06E-01 | 1 |
| MFHAS1   | 164853  | 395  | 34  | 2536856 | 845500  | 0 | 7  | 4 | 0 | 7  | 14 | 4451780  | 9.06E-01 | 1 |
| NFAT5    | 1302986 | NaN  | 41  | 3953736 | 1072272 | 0 | 10 | 1 | 0 | 0  | 1  | 1072272  | 9.06E-01 | 1 |
| SHF      | 667418  | 544  | 27  | 1074052 | 314348  | 0 | 3  | 2 | 0 | 14 | 30 | 7432212  | 9.06E-01 | 1 |
| VDR      | 387225  | 207  | 44  | 1105024 | 300464  | 0 | 1  | 1 | 0 | 50 | 46 | 19163480 | 9.06E-01 | 1 |
| MLXIP    | 776345  | NaN  | 34  | 2321476 | 694556  | 0 | 4  | 2 | 0 | 50 | 63 | 22458616 | 9.07E-01 | 1 |
| MRPL10   | 1071489 | 214  | 29  | 655040  | 203632  | 0 | 1  | 1 | 0 | 12 | 13 | 4017104  | 9.07E-01 | 1 |
| LRRC34   | 404285  | 689  | 13  | 1228200 | 327876  | 0 | 2  | 2 | 0 | 50 | 66 | 21327960 | 9.07E-01 | 1 |
| ZBTB49   | 146158  | 506  | 40  | 1966188 | 517980  | 0 | 9  | 3 | 0 | 13 | 29 | 6297640  | 9.07E-01 | 1 |
| HDAC6    | 823539  | NaN  | 29  | 3076908 | 938772  | 0 | 10 | 1 | 0 | 15 | 22 | 7055208  | 9.07E-01 | 1 |
| PSKH2    | 191789  | 1214 | -25 | 961200  | 281952  | 0 | 2  | 1 | 0 | 50 | 94 | 23368552 | 9.07E-01 | 1 |
| TRIOBP   | 1114524 | 180  | 74  | 6037760 | 1957288 | 0 | 10 | 2 | 0 | 4  | 3  | 2759712  | 9.07E-01 | 1 |
| ZNF500   | 706891  | 195  | 33  | 1196516 | 365968  | 0 | 1  | 0 | 0 | 16 | 14 | 6945916  | 9.07E-01 | 1 |
| DBX2     | 126551  | 805  | -18 | 834108  | 268068  | 0 | 1  | 2 | 0 | 32 | 42 | 12628744 | 9.07E-01 | 1 |
| FBXL8    | 1093307 | 150  | 47  | 887508  | 326808  | 0 | 1  | 3 | 0 | 6  | 5  | 2474200  | 9.07E-01 | 1 |
| SEC22A   | 338654  | 421  | 48  | 797440  | 215024  | 0 | 1  | 1 | 0 | 50 | 72 | 24009352 | 9.07E-01 | 1 |
| PSRC1    | 988224  | 302  | 29  | 938416  | 231044  | 0 | 1  | 0 | 0 | 50 | 71 | 22043520 | 9.07E-01 | 1 |
| GAS8     | 939646  | 221  | 31  | 1252052 | 325384  | 0 | 3  | 2 | 0 | 31 | 47 | 11896096 | 9.07E-01 | 1 |
| STYK1    | 408572  | 432  | 0   | 1086868 | 306872  | 0 | 1  | 2 | 0 | 50 | 56 | 20777940 | 9.07E-01 | 1 |
| NOP56    | 792941  | 450  | 48  | 1532936 | 424708  | 0 | 4  | 3 | 0 | 8  | 13 | 3871856  | 9.07E-01 | 1 |
| ACTN1    | 609757  | 344  | 44  | 2395880 | 625492  | 0 | 7  | 0 | 0 | 2  | 2  | 1119264  | 9.07E-01 | 1 |
| KIAA0101 | 766091  | 263  | 33  | 321112  | 77252   | 0 | 1  | 1 | 0 | 2  | 5  | 812036   | 9.07E-01 | 1 |
| FAM135A  | 114193  | 606  | 11  | 3991116 | 1034892 | 0 | 4  | 3 | 0 | 50 | 52 | 19406272 | 9.07E-01 | 1 |
| NR2C2    | 483299  | 400  | 43  | 1593100 | 440372  | 0 | 4  | 0 | 0 | 4  | 3  | 1158424  | 9.07E-01 | 1 |
| HSPA1B   | 2509866 | 183  | 32  | 1573876 | 483092  | 0 | 2  | 1 | 0 | 50 | 56 | 22464668 | 9.07E-01 | 1 |
| DDB2     | 1274054 | 198  | 38  | 1106092 | 303668  | 0 | 3  | 5 | 0 | 4  | 13 | 1874340  | 9.07E-01 | 1 |
| CDCA2    | 178565  | 618  | 22  | 2627636 | 710932  | 0 | 4  | 2 | 0 | 42 | 38 | 17775792 | 9.07E-01 | 1 |
| SLC22A8  | 2447828 | 398  | 48  | 1368820 | 417944  | 0 | 5  | 2 | 0 | 24 | 40 | 8624812  | 9.07E-01 | 1 |



|          |         |     |     |         |         |   |    |   |   |    |    |          |          |   |
|----------|---------|-----|-----|---------|---------|---|----|---|---|----|----|----------|----------|---|
| MYOZ3    | 1107515 | 211 | 54  | 641156  | 190816  | 0 | 1  | 2 | 0 | 12 | 23 | 6739080  | 9.07E-01 | 1 |
| SLC37A2  | 428178  | 762 | 30  | 1342120 | 375224  | 0 | 1  | 2 | 0 | 15 | 3  | 2294776  | 9.07E-01 | 1 |
| RRN3     | 564013  | 463 | 22  | 1720904 | 442864  | 0 | 3  | 3 | 0 | 50 | 49 | 18364972 | 9.07E-01 | 1 |
| ZBTB24   | 337228  | 559 | 33  | 1839808 | 475616  | 0 | 3  | 1 | 0 | 45 | 64 | 23750184 | 9.07E-01 | 1 |
| KRT23    | 1036346 | 358 | 5   | 1096124 | 289072  | 0 | 1  | 2 | 0 | 50 | 61 | 13481008 | 9.07E-01 | 1 |
| FRMPD2   | 112127  | 451 | 35  | 3365980 | 950876  | 0 | 6  | 3 | 0 | 50 | 66 | 22591760 | 9.07E-01 | 1 |
| CAPN7    | 511283  | 367 | 30  | 2149884 | 543612  | 0 | 2  | 3 | 0 | 50 | 66 | 22193040 | 9.08E-01 | 1 |
| PCYT1A   | 1103198 | 207 | 43  | 965828  | 247420  | 0 | 1  | 0 | 0 | 34 | 35 | 13970152 | 9.08E-01 | 1 |
| FAM57B   | NaN     | NaN | NaN | 686012  | 212176  | 0 | 1  | 2 | 0 | 26 | 42 | 11789296 | 9.08E-01 | 1 |
| SLC44A4  | 2485614 | 188 | 36  | 1839452 | 526168  | 0 | 3  | 5 | 0 | 13 | 13 | 3768616  | 9.08E-01 | 1 |
| NPHP3    | 211862  | 768 | 24  | 3455336 | 922396  | 0 | 11 | 3 | 0 | 16 | 19 | 6776104  | 9.08E-01 | 1 |
| TRIM6    | NaN     | NaN | NaN | 1315420 | 370952  | 0 | 1  | 3 | 0 | 26 | 43 | 11948072 | 9.08E-01 | 1 |
| HEPACAM  | 283718  | 743 | 13  | 1031688 | 330012  | 0 | 1  | 1 | 0 | 50 | 60 | 22507744 | 9.08E-01 | 1 |
| KCMF1    | 926772  | 202 | 23  | 975084  | 274476  | 0 | 2  | 1 | 0 | 50 | 68 | 17629476 | 9.08E-01 | 1 |
| ZNF227   | 618477  | 671 | -31 | 2082956 | 497332  | 0 | 4  | 1 | 0 | 50 | 57 | 18064864 | 9.08E-01 | 1 |
| EIF6     | 1290513 | 170 | 45  | 741904  | 194732  | 0 | 2  | 3 | 0 | 2  | 8  | 1208264  | 9.08E-01 | 1 |
| CC2D1A   | 930314  | 231 | 32  | 2434328 | 735496  | 0 | 6  | 2 | 0 | 9  | 21 | 4861892  | 9.08E-01 | 1 |
| REXO2    | 98814   | 612 | -12 | 631544  | 156640  | 0 | 1  | 1 | 0 | 5  | 7  | 2025996  | 9.08E-01 | 1 |
| CNOT6L   | 152352  | 493 | 18  | 1452836 | 377716  | 0 | 2  | 0 | 0 | 23 | 26 | 10220048 | 9.08E-01 | 1 |
| LRRC3B   | 5998    | 918 | -24 | 651124  | 181916  | 0 | 1  | 0 | 0 | 50 | 80 | 20784348 | 9.08E-01 | 1 |
| FKBP7    | 170323  | 555 | 37  | 586688  | 140620  | 0 | 1  | 2 | 0 | 11 | 13 | 2651488  | 9.08E-01 | 1 |
| RBMX2    | 301748  | NaN | 37  | 842296  | 216092  | 0 | 1  | 1 | 0 | 50 | 61 | 18917128 | 9.08E-01 | 1 |
| RGL3     | 1255985 | 265 | 32  | 1813108 | 563192  | 0 | 4  | 0 | 0 | 4  | 6  | 2083668  | 9.08E-01 | 1 |
| PODXL    | 236261  | 220 | 27  | 1384484 | 440728  | 0 | 1  | 2 | 0 | 50 | 48 | 19559352 | 9.08E-01 | 1 |
| GCNT3    | 521844  | 172 | 33  | 1112500 | 298328  | 0 | 2  | 2 | 0 | 26 | 35 | 11001468 | 9.08E-01 | 1 |
| MIA2     | 314590  | 300 | 21  | 1693492 | 426488  | 0 | 3  | 0 | 0 | 5  | 7  | 3414752  | 9.08E-01 | 1 |
| MPRSS11  | 212678  | 809 | 4   | 1105736 | 284800  | 0 | 2  | 2 | 0 | 50 | 60 | 18569316 | 9.08E-01 | 1 |
| GCC2     | 362408  | 478 | 6   | 4446796 | 1045928 | 0 | 12 | 1 | 0 | 0  | 1  | 1045928  | 9.08E-01 | 1 |
| SLC22A23 | 465372  | 453 | 27  | 1702748 | 536848  | 0 | 3  | 1 | 0 | 5  | 3  | 1365972  | 9.08E-01 | 1 |
| MEST     | 325887  | 298 | 31  | 881100  | 242436  | 0 | 1  | 1 | 0 | 48 | 54 | 17663652 | 9.08E-01 | 1 |
| CABYR    | 233052  | 360 | 52  | 1731228 | 517980  | 0 | 3  | 0 | 0 | 9  | 4  | 2145256  | 9.08E-01 | 1 |
| INHA     | 548994  | 487 | 35  | 866504  | 313636  | 0 | 1  | 3 | 0 | 19 | 44 | 12076944 | 9.08E-01 | 1 |
| BCOR     | 377184  | NaN | 42  | 4390192 | 1295840 | 0 | 9  | 3 | 0 | 50 | 57 | 25006152 | 9.09E-01 | 1 |

|          |         |      |     |         |         |   |    |   |   |    |     |          |          |   |
|----------|---------|------|-----|---------|---------|---|----|---|---|----|-----|----------|----------|---|
| CPM      | 645106  | 228  | 28  | 1159492 | 297260  | 0 | 2  | 1 | 0 | 44 | 62  | 17868708 | 9.09E-01 | 1 |
| RILP     | 1361271 | 198  | 27  | 997156  | 320756  | 0 | 1  | 0 | 0 | 50 | 60  | 20575376 | 9.09E-01 | 1 |
| ZNF467   | 471461  | 615  | 29  | 1471348 | 455324  | 0 | 2  | 0 | 0 | 32 | 36  | 14158832 | 9.09E-01 | 1 |
| ANPEP    | 934542  | 212  | 37  | 2492000 | 690640  | 0 | 6  | 2 | 0 | 50 | 65  | 20979792 | 9.09E-01 | 1 |
| BMPR2    | 369483  | 417  | 30  | 2641520 | 738700  | 0 | 7  | 4 | 0 | 18 | 25  | 8689960  | 9.09E-01 | 1 |
| TBX6     | 2171952 | 164  | 62  | 1080816 | 353508  | 0 | 2  | 0 | 0 | 19 | 38  | 10731976 | 9.09E-01 | 1 |
| FCHSD1   | 771583  | 353  | 25  | 1766472 | 530796  | 0 | 2  | 0 | 0 | 28 | 26  | 13202616 | 9.09E-01 | 1 |
| IDH2     | 851518  | 192  | 38  | 1175868 | 320400  | 0 | 2  | 2 | 0 | 50 | 59  | 18318692 | 9.09E-01 | 1 |
| JHRF1BP1 | 184820  | 559  | 7   | 3817744 | 985052  | 0 | 9  | 5 | 0 | 50 | 57  | 22009344 | 9.09E-01 | 1 |
| INSC     | 161776  | 781  | -17 | 1475620 | 436100  | 0 | 4  | 2 | 0 | 47 | 78  | 19540484 | 9.09E-01 | 1 |
| LRRFIP1  | 542668  | 347  | 33  | 3085452 | 786048  | 0 | 3  | 0 | 0 | 7  | 4   | 3744764  | 9.09E-01 | 1 |
| RRP12    | 892254  | 188  | 39  | 3330024 | 969744  | 0 | 9  | 3 | 0 | 50 | 71  | 21552240 | 9.09E-01 | 1 |
| TXNDC11  | 593829  | 214  | 40  | 2419020 | 704880  | 0 | 6  | 0 | 0 | 1  | 0   | 773588   | 9.09E-01 | 1 |
| ERBB4    | 20702   | 1173 | -5  | 3415820 | 895696  | 0 | 9  | 2 | 0 | 5  | 6   | 2427564  | 9.09E-01 | 1 |
| UROC1    | 289633  | 508  | 52  | 1904600 | 544324  | 0 | 5  | 4 | 0 | 20 | 25  | 7817404  | 9.09E-01 | 1 |
| FUT6     | 1217326 | 294  | 35  | 892136  | 265576  | 0 | 1  | 1 | 0 | 50 | 56  | 18189820 | 9.09E-01 | 1 |
| RABL2A   | 522522  | 603  | 16  | 626916  | 145248  | 0 | 1  | 1 | 0 | 50 | 76  | 19682528 | 9.09E-01 | 1 |
| ASZ1     | 262404  | 394  | -1  | 1259172 | 319332  | 0 | 1  | 2 | 0 | 46 | 46  | 23425512 | 9.09E-01 | 1 |
| APCDD1L  | 1027182 | 485  | 24  | 1204348 | 416876  | 0 | 2  | 0 | 0 | 19 | 28  | 9283412  | 9.09E-01 | 1 |
| KRT36    | 1445853 | 325  | -22 | 1170884 | 354220  | 0 | 4  | 0 | 0 | 2  | 3   | 1035960  | 9.09E-01 | 1 |
| AP2A1    | 1686482 | 172  | 42  | 2487728 | 744040  | 0 | 4  | 0 | 0 | 1  | 0   | 1031688  | 9.09E-01 | 1 |
| ZNF146   | 923127  | 419  | -26 | 758636  | 180136  | 0 | 4  | 2 | 0 | 1  | 2   | 441440   | 9.09E-01 | 1 |
| NBPF15   | NaN     | NaN  | NaN | 1781780 | 432184  | 0 | 3  | 1 | 0 | 50 | 117 | 40077768 | 9.09E-01 | 1 |
| TBCB     | 978272  | 326  | 6   | 629764  | 176576  | 0 | 1  | 2 | 0 | 32 | 46  | 10310116 | 9.10E-01 | 1 |
| SNED1    | 1332160 | 278  | 33  | 3627996 | 1033824 | 0 | 7  | 2 | 0 | 1  | 2   | 1605916  | 9.10E-01 | 1 |
| SLC6A11  | 225460  | 545  | 30  | 1636888 | 451052  | 0 | 2  | 1 | 0 | 50 | 52  | 20886520 | 9.10E-01 | 1 |
| BCL2L14  | 331421  | 489  | 26  | 915632  | 245284  | 0 | 1  | 1 | 0 | 41 | 51  | 16729152 | 9.10E-01 | 1 |
| KCNAB1   | 502198  | 782  | 4   | 1491284 | 410824  | 0 | 4  | 3 | 0 | 4  | 6   | 1677828  | 9.10E-01 | 1 |
| SHANK1   | 632386  | 593  | 31  | 5200092 | 1823076 | 0 | 15 | 7 | 0 | 50 | 58  | 19947748 | 9.10E-01 | 1 |
| LCP1     | 400791  | 682  | 47  | 1646856 | 429336  | 0 | 4  | 3 | 0 | 12 | 10  | 3796384  | 9.10E-01 | 1 |
| WNK2     | 479663  | 408  | 49  | 5419744 | 1806344 | 0 | 8  | 2 | 0 | 8  | 9   | 6221812  | 9.10E-01 | 1 |
| OR51F1   | 207755  | 972  | -1  | 762552  | 239232  | 0 | 1  | 2 | 0 | 12 | 12  | 3866160  | 9.10E-01 | 1 |
| KCTD19   | 1201743 | 142  | 56  | 2369180 | 671416  | 0 | 8  | 3 | 0 | 11 | 22  | 6211844  | 9.10E-01 | 1 |

|          |         |     |     |         |         |   |    |   |   |    |    |          |          |   |
|----------|---------|-----|-----|---------|---------|---|----|---|---|----|----|----------|----------|---|
| AURKA    | 254679  | 672 | -43 | 1045216 | 283376  | 0 | 2  | 0 | 0 | 33 | 67 | 17771520 | 9.10E-01 | 1 |
| SEPSECS  | 338354  | 506 | 32  | 1297976 | 353152  | 0 | 1  | 1 | 0 | 50 | 49 | 20148532 | 9.10E-01 | 1 |
| SEC31B   | 1153157 | 264 | 50  | 2998944 | 888576  | 0 | 8  | 1 | 0 | 2  | 2  | 1274480  | 9.10E-01 | 1 |
| CINP     | 1659098 | 214 | 32  | 616236  | 145248  | 0 | 2  | 1 | 0 | 4  | 14 | 2498764  | 9.10E-01 | 1 |
| TUBG2    | 1740597 | 177 | 36  | 1165900 | 325028  | 0 | 4  | 3 | 0 | 4  | 17 | 2862596  | 9.10E-01 | 1 |
| PANX1    | 367552  | 774 | -16 | 1082240 | 302956  | 0 | 2  | 1 | 0 | 50 | 61 | 16199780 | 9.10E-01 | 1 |
| SLC9A6   | 248961  | NaN | 24  | 1810616 | 511216  | 0 | 2  | 1 | 0 | 18 | 23 | 11089756 | 9.10E-01 | 1 |
| PIK3C2A  | 513121  | 436 | 10  | 4380936 | 1158780 | 0 | 13 | 3 | 0 | 3  | 6  | 2138848  | 9.10E-01 | 1 |
| B3GAT3   | 2695768 | 217 | 42  | 814884  | 280884  | 0 | 1  | 1 | 0 | 17 | 27 | 9232504  | 9.10E-01 | 1 |
| GAA      | 663665  | 237 | 27  | 2399796 | 734784  | 0 | 5  | 0 | 0 | 0  | 0  | 734784   | 9.10E-01 | 1 |
| TAF5     | 545643  | 147 | 45  | 2022436 | 588824  | 0 | 2  | 1 | 0 | 50 | 60 | 18601000 | 9.10E-01 | 1 |
| POU5F1   | 3364017 | 401 | 19  | 896052  | 279816  | 0 | 1  | 1 | 0 | 45 | 41 | 13756552 | 9.10E-01 | 1 |
| PROZ     | 759371  | 229 | 38  | 1032044 | 284800  | 0 | 1  | 1 | 0 | 47 | 50 | 18676472 | 9.10E-01 | 1 |
| C6orf203 | 214917  | 417 | 22  | 637952  | 167320  | 0 | 1  | 2 | 0 | 13 | 18 | 5048080  | 9.11E-01 | 1 |
| ARID3C   | 731413  | 298 | 51  | 1015668 | 332148  | 0 | 3  | 3 | 0 | 12 | 11 | 3186200  | 9.11E-01 | 1 |
| WDR12    | 596746  | 392 | 31  | 1122824 | 286936  | 0 | 1  | 1 | 0 | 50 | 51 | 21099764 | 9.11E-01 | 1 |
| RAB3IP   | 561550  | 488 | -11 | 1258104 | 312924  | 0 | 2  | 1 | 0 | 50 | 60 | 19572168 | 9.11E-01 | 1 |
| MEM161A  | 1260413 | 215 | 35  | 1192956 | 394092  | 0 | 1  | 0 | 0 | 30 | 40 | 9461768  | 9.11E-01 | 1 |
| JMJD4    | 595623  | 459 | 1   | 1235320 | 370952  | 0 | 1  | 2 | 0 | 50 | 38 | 16917832 | 9.11E-01 | 1 |
| KATNB1   | 712945  | 168 | 34  | 1686372 | 492348  | 0 | 3  | 2 | 0 | 50 | 57 | 21352524 | 9.11E-01 | 1 |
| LRRC23   | 2704950 | 211 | 47  | 1042368 | 285156  | 0 | 1  | 1 | 0 | 1  | 1  | 1276260  | 9.11E-01 | 1 |
| LINGO4   | 1062482 | 255 | 29  | 1403708 | 503740  | 0 | 2  | 2 | 0 | 12 | 10 | 4320060  | 9.11E-01 | 1 |
| TBC1D13  | 1768145 | 201 | 34  | 1059456 | 272340  | 0 | 1  | 1 | 0 | 26 | 29 | 9773980  | 9.11E-01 | 1 |
| DENND2A  | 356082  | 503 | 31  | 2564268 | 744396  | 0 | 10 | 5 | 0 | 7  | 13 | 3679260  | 9.11E-01 | 1 |
| ANXA11   | 366637  | 626 | 7   | 1297264 | 383768  | 0 | 3  | 1 | 0 | 50 | 75 | 19965548 | 9.11E-01 | 1 |
| CLK4     | 492630  | 675 | 17  | 1297620 | 295836  | 0 | 2  | 1 | 0 | 50 | 64 | 22444376 | 9.11E-01 | 1 |
| DDN      | 1737773 | 214 | 55  | 1691000 | 596656  | 0 | 4  | 0 | 0 | 0  | 0  | 596656   | 9.11E-01 | 1 |
| BCAR1    | 568174  | 171 | 16  | 2435752 | 797084  | 0 | 4  | 2 | 0 | 42 | 36 | 16524808 | 9.11E-01 | 1 |
| HLA-DRB1 | 1074109 | 595 | 29  | 682808  | 196156  | 0 | 1  | 1 | 0 | 50 | 76 | 18146032 | 9.11E-01 | 1 |
| STK11IP  | 548994  | 487 | 35  | 2758288 | 870776  | 0 | 6  | 2 | 0 | 40 | 56 | 20065584 | 9.11E-01 | 1 |
| NCAPD2   | 2764720 | 179 | 42  | 3597024 | 1027416 | 0 | 10 | 3 | 0 | 19 | 23 | 8223600  | 9.11E-01 | 1 |
| ZC3H3    | 2168942 | 235 | 34  | 2317916 | 771808  | 0 | 3  | 1 | 0 | 30 | 24 | 12078012 | 9.11E-01 | 1 |
| CLINT1   | 227687  | 916 | 44  | 1631192 | 421504  | 0 | 3  | 0 | 0 | 6  | 7  | 2923116  | 9.11E-01 | 1 |

|          |         |     |     |         |         |   |   |   |   |    |     |          |          |   |
|----------|---------|-----|-----|---------|---------|---|---|---|---|----|-----|----------|----------|---|
| CCDC144A | 1101297 | 499 | -18 | 3760784 | 889288  | 0 | 7 | 1 | 0 | 5  | 3   | 2066224  | 9.11E-01 | 1 |
| TTYH2    | 321651  | 535 | 3   | 1368820 | 402992  | 0 | 3 | 4 | 0 | 5  | 12  | 2806348  | 9.11E-01 | 1 |
| RAB3GAP2 | 651142  | 476 | 4   | 3652204 | 959420  | 0 | 7 | 1 | 0 | 2  | 3   | 2152020  | 9.11E-01 | 1 |
| MMP1     | 510838  | 567 | -16 | 1238524 | 310076  | 0 | 2 | 1 | 0 | 50 | 58  | 18555432 | 9.11E-01 | 1 |
| WISP1    | 235882  | 481 | 12  | 935212  | 265220  | 0 | 3 | 2 | 0 | 1  | 2   | 793524   | 9.11E-01 | 1 |
| C19orf54 | 1127178 | 201 | 27  | 861520  | 287648  | 0 | 1 | 1 | 0 | 50 | 68  | 19652268 | 9.11E-01 | 1 |
| SLC5A5   | 1291250 | 204 | 37  | 1596660 | 526524  | 0 | 3 | 3 | 0 | 50 | 53  | 16788604 | 9.11E-01 | 1 |
| NBPF11   | NaN     | NaN | NaN | 4183000 | 1039520 | 0 | 9 | 3 | 0 | 50 | 119 | 40685104 | 9.11E-01 | 1 |
| RGS4     | 315405  | 691 | -14 | 804204  | 187968  | 0 | 1 | 1 | 0 | 50 | 56  | 17889000 | 9.11E-01 | 1 |
| CGNL1    | 189519  | 561 | 10  | 3356724 | 894984  | 0 | 5 | 2 | 0 | 50 | 47  | 23187704 | 9.12E-01 | 1 |
| AWAT2    | 166632  | NaN | 16  | 861520  | 240656  | 0 | 1 | 0 | 0 | 50 | 73  | 21348964 | 9.12E-01 | 1 |
| OR1L1    | 409923  | 553 | 12  | 766468  | 227840  | 0 | 1 | 1 | 0 | 50 | 56  | 16898964 | 9.12E-01 | 1 |
| SULT1C3  | 354622  | 708 | -17 | 818088  | 183696  | 0 | 1 | 0 | 0 | 50 | 49  | 14515188 | 9.12E-01 | 1 |
| FBXL3    | 218827  | 551 | 34  | 1093988 | 296548  | 0 | 3 | 2 | 0 | 19 | 26  | 7166636  | 9.12E-01 | 1 |
| USP40    | 351003  | 307 | 35  | 3227140 | 822716  | 0 | 6 | 2 | 0 | 50 | 42  | 18327948 | 9.12E-01 | 1 |
| TBXAS1   | 485631  | 679 | 36  | 1502320 | 419012  | 0 | 2 | 2 | 0 | 50 | 51  | 19055256 | 9.12E-01 | 1 |
| TAS2R42  | 311688  | 617 | 7   | 786404  | 222856  | 0 | 1 | 1 | 0 | 50 | 66  | 20956296 | 9.12E-01 | 1 |
| ZIC3     | 12849   | NaN | -2  | 1166256 | 341760  | 0 | 3 | 1 | 0 | 33 | 55  | 12652952 | 9.12E-01 | 1 |
| CDRT1    | 464501  | 419 | -27 | 1943048 | 516556  | 0 | 2 | 1 | 0 | 43 | 54  | 16909288 | 9.12E-01 | 1 |
| LNX2     | 327769  | 583 | 60  | 1755436 | 496976  | 0 | 3 | 3 | 0 | 48 | 48  | 12817424 | 9.12E-01 | 1 |
| ZNF517   | 1454261 | 384 | 20  | 1221080 | 375580  | 0 | 3 | 4 | 0 | 7  | 18  | 3447148  | 9.12E-01 | 1 |
| PGBD2    | 113516  | 547 | -2  | 1502676 | 405840  | 0 | 2 | 0 | 0 | 50 | 68  | 24078772 | 9.12E-01 | 1 |
| NSF      | 525541  | 203 | 12  | 1964764 | 507656  | 0 | 6 | 1 | 0 | 4  | 10  | 2496272  | 9.12E-01 | 1 |
| LRRC8E   | 952640  | 320 | 27  | 1951948 | 610184  | 0 | 3 | 4 | 0 | 18 | 34  | 7729828  | 9.12E-01 | 1 |
| BTNL9    | 893236  | 602 | 29  | 1354580 | 405484  | 0 | 4 | 0 | 0 | 4  | 6   | 1552160  | 9.12E-01 | 1 |
| PLA2G4F  | 655295  | 394 | 36  | 2166260 | 640444  | 0 | 5 | 5 | 0 | 9  | 15  | 4733020  | 9.12E-01 | 1 |
| TUBGCP5  | 347364  | 564 | -32 | 2744404 | 681740  | 0 | 4 | 3 | 0 | 50 | 71  | 19747320 | 9.12E-01 | 1 |
| VPS4B    | 206996  | 278 | 92  | 1156288 | 312212  | 0 | 2 | 1 | 0 | 50 | 67  | 19860172 | 9.12E-01 | 1 |
| SIGIRR   | 2206786 | 344 | 58  | 1026704 | 324316  | 0 | 2 | 1 | 0 | 50 | 92  | 24128968 | 9.12E-01 | 1 |
| SRFBP1   | 70781   | 809 | -4  | 1123180 | 286580  | 0 | 4 | 0 | 0 | 2  | 6   | 1247780  | 9.13E-01 | 1 |
| GJC1     | 1162976 | 172 | 29  | 1001784 | 274476  | 0 | 1 | 0 | 0 | 16 | 18  | 5718072  | 9.13E-01 | 1 |
| NRBF2    | 219747  | 715 | 8   | 741904  | 193664  | 0 | 3 | 2 | 0 | 1  | 2   | 631544   | 9.13E-01 | 1 |
| HOXD3    | 245316  | 874 | 13  | 1064796 | 331080  | 0 | 2 | 1 | 0 | 50 | 66  | 17973016 | 9.13E-01 | 1 |

|          |         |     |     |         |         |   |    |   |   |    |     |          |          |   |
|----------|---------|-----|-----|---------|---------|---|----|---|---|----|-----|----------|----------|---|
| UNC45A   | 833957  | 291 | 42  | 2390184 | 718764  | 0 | 5  | 3 | 0 | 50 | 63  | 21711728 | 9.13E-01 | 1 |
| SLC25A18 | 431029  | 390 | -37 | 804916  | 241724  | 0 | 1  | 1 | 0 | 50 | 76  | 20635896 | 9.13E-01 | 1 |
| IL9R     | NaN     | NaN | NaN | 1324320 | 382344  | 0 | 2  | 1 | 0 | 50 | 117 | 40027928 | 9.13E-01 | 1 |
| GYG2     | 197004  | NaN | 17  | 1289076 | 362052  | 0 | 2  | 1 | 0 | 50 | 73  | 23563284 | 9.13E-01 | 1 |
| OR6N1    | 103627  | 985 | 1   | 763264  | 238520  | 0 | 6  | 3 | 0 | 3  | 9   | 983984   | 9.13E-01 | 1 |
| ISLR     | 492755  | 317 | 46  | 1033468 | 345320  | 0 | 1  | 1 | 0 | 50 | 52  | 22095852 | 9.13E-01 | 1 |
| HHATL    | 369022  | 329 | 34  | 1288008 | 379140  | 0 | 1  | 0 | 0 | 50 | 41  | 20048140 | 9.13E-01 | 1 |
| GPR182   | 2103486 | 286 | 26  | 982916  | 318976  | 0 | 1  | 2 | 0 | 50 | 85  | 24401308 | 9.13E-01 | 1 |
| AHCYL1   | 660515  | 373 | 29  | 1401928 | 367748  | 0 | 2  | 2 | 0 | 3  | 5   | 1719836  | 9.13E-01 | 1 |
| SAAL1    | 631291  | 436 | 20  | 1264512 | 308652  | 0 | 2  | 0 | 0 | 50 | 76  | 24807148 | 9.13E-01 | 1 |
| CD177    | 345698  | 182 | -48 | 1111076 | 328588  | 0 | 4  | 1 | 0 | 23 | 48  | 10296232 | 9.13E-01 | 1 |
| GPBP1L1  | 913416  | 157 | 28  | 1231760 | 332860  | 0 | 2  | 2 | 0 | 50 | 81  | 24195896 | 9.13E-01 | 1 |
| PPM1H    | 298536  | 426 | 0   | 1295484 | 393024  | 0 | 1  | 1 | 0 | 50 | 54  | 21635188 | 9.13E-01 | 1 |
| RNF43    | 782135  | 399 | 22  | 1934504 | 611608  | 0 | 3  | 0 | 0 | 17 | 38  | 14673608 | 9.13E-01 | 1 |
| ASB1     | 246085  | 513 | 27  | 833752  | 262016  | 0 | 1  | 1 | 0 | 50 | 51  | 17467852 | 9.13E-01 | 1 |
| KIF26B   | 609429  | 825 | -5  | 5199736 | 1617308 | 0 | 13 | 5 | 0 | 20 | 19  | 6768272  | 9.13E-01 | 1 |
| RER1     | 561270  | 302 | 24  | 519760  | 137060  | 0 | 1  | 2 | 0 | 3  | 3   | 1062304  | 9.13E-01 | 1 |
| SPAG8    | 847663  | 227 | 54  | 1447496 | 426844  | 0 | 2  | 0 | 0 | 2  | 0   | 838380   | 9.13E-01 | 1 |
| ZNF625   | 1025728 | 728 | -15 | 788540  | 199360  | 0 | 3  | 0 | 0 | 50 | 149 | 23540500 | 9.13E-01 | 1 |
| GALT     | 731413  | 298 | 51  | 985408  | 276968  | 0 | 1  | 0 | 0 | 45 | 36  | 14802836 | 9.13E-01 | 1 |
| TACSTD2  | 301269  | 564 | -5  | 775012  | 263084  | 0 | 1  | 1 | 0 | 50 | 54  | 16901812 | 9.13E-01 | 1 |
| SV2A     | 798975  | 560 | 17  | 1883952 | 543612  | 0 | 5  | 2 | 0 | 21 | 23  | 6253852  | 9.13E-01 | 1 |
| APBA1    | 209495  | 673 | -5  | 2139204 | 597012  | 0 | 3  | 2 | 0 | 50 | 55  | 23316932 | 9.13E-01 | 1 |
| PLA2G2F  | 567393  | 501 | 23  | 554292  | 144180  | 0 | 1  | 2 | 0 | 8  | 12  | 2829844  | 9.13E-01 | 1 |
| CADM4    | 441738  | 209 | 6   | 984340  | 298328  | 0 | 2  | 2 | 0 | 14 | 16  | 4113936  | 9.13E-01 | 1 |
| BAG1     | 856503  | 167 | 38  | 880388  | 255964  | 0 | 1  | 1 | 0 | 50 | 62  | 21222584 | 9.13E-01 | 1 |
| ZNF689   | 2255010 | 158 | 60  | 1232828 | 380920  | 0 | 2  | 1 | 0 | 50 | 74  | 23170972 | 9.14E-01 | 1 |
| PER3     | 370145  | 415 | 23  | 3076552 | 860096  | 0 | 9  | 1 | 0 | 5  | 5   | 2330020  | 9.14E-01 | 1 |
| CDH24    | 1261207 | 185 | 41  | 2012824 | 661448  | 0 | 3  | 0 | 0 | 2  | 2   | 1796020  | 9.14E-01 | 1 |
| TRUB2    | 1813435 | 201 | 46  | 840516  | 255252  | 0 | 1  | 1 | 0 | 50 | 69  | 20850564 | 9.14E-01 | 1 |
| EPN3     | 1532661 | 200 | 20  | 1556432 | 505876  | 0 | 4  | 3 | 0 | 50 | 83  | 22594252 | 9.14E-01 | 1 |
| MRE11A   | 320374  | 589 | -10 | 1883952 | 464580  | 0 | 3  | 2 | 0 | 50 | 38  | 15707076 | 9.14E-01 | 1 |
| CARM1    | 2031768 | 193 | 35  | 1570672 | 444644  | 0 | 5  | 2 | 0 | 6  | 17  | 3124968  | 9.14E-01 | 1 |

|          |         |      |     |         |         |   |    |   |   |    |    |          |          |   |
|----------|---------|------|-----|---------|---------|---|----|---|---|----|----|----------|----------|---|
| KBTBD4   | 995645  | 214  | 31  | 1344256 | 389108  | 0 | 2  | 0 | 0 | 14 | 14 | 5095784  | 9.14E-01 | 1 |
| PGGT1B   | 237444  | 619  | 9   | 984696  | 262728  | 0 | 1  | 0 | 0 | 32 | 41 | 16069840 | 9.14E-01 | 1 |
| RPLP0    | 1608347 | 225  | 59  | 808476  | 242436  | 0 | 1  | 0 | 0 | 50 | 60 | 16943820 | 9.14E-01 | 1 |
| NFRSF131 | 1122696 | 237  | 2   | 748668  | 212532  | 0 | 1  | 0 | 0 | 50 | 59 | 17313348 | 9.14E-01 | 1 |
| USP45    | 256853  | 638  | 15  | 2146680 | 537204  | 0 | 3  | 1 | 0 | 20 | 31 | 14347156 | 9.14E-01 | 1 |
| KCTD1    | 173654  | 429  | 31  | 2145256 | 646496  | 0 | 2  | 0 | 0 | 5  | 9  | 3927392  | 9.14E-01 | 1 |
| FAM46B   | 929681  | 336  | 34  | 1014600 | 354576  | 0 | 4  | 0 | 0 | 0  | 0  | 354576   | 9.14E-01 | 1 |
| ZFP90    | 765949  | 421  | 34  | 1650060 | 405840  | 0 | 4  | 1 | 0 | 50 | 68 | 22402012 | 9.14E-01 | 1 |
| BAG5     | 867608  | 225  | 39  | 1240304 | 334996  | 0 | 2  | 1 | 0 | 50 | 63 | 19588900 | 9.14E-01 | 1 |
| PRDX5    | 1613996 | 257  | 65  | 535068  | 175152  | 0 | 1  | 1 | 0 | 19 | 29 | 6446448  | 9.14E-01 | 1 |
| ALG12    | 771339  | 208  | 6   | 1208976 | 396228  | 0 | 2  | 2 | 0 | 50 | 76 | 22468940 | 9.14E-01 | 1 |
| AP2A2    | 1509286 | 246  | 48  | 2400864 | 700608  | 0 | 4  | 1 | 0 | 2  | 2  | 1460312  | 9.14E-01 | 1 |
| NRAP     | 195180  | 587  | 1   | 4574600 | 1148812 | 0 | 12 | 5 | 0 | 21 | 21 | 8579956  | 9.14E-01 | 1 |
| ERCC1    | 1259254 | 191  | 39  | 870420  | 258456  | 0 | 2  | 0 | 0 | 8  | 11 | 2860460  | 9.14E-01 | 1 |
| MTRR     | 66042   | 1013 | -9  | 1865796 | 526524  | 0 | 4  | 2 | 0 | 50 | 63 | 21157792 | 9.14E-01 | 1 |
| DDX20    | 333198  | 440  | 25  | 2115708 | 570312  | 0 | 11 | 5 | 0 | 1  | 6  | 1192956  | 9.14E-01 | 1 |
| TFAP2C   | 280847  | 442  | -44 | 1129944 | 340692  | 0 | 3  | 3 | 0 | 7  | 14 | 3512296  | 9.14E-01 | 1 |
| NSMCE1   | 227767  | 448  | 27  | 712356  | 173016  | 0 | 4  | 2 | 0 | 1  | 2  | 501960   | 9.14E-01 | 1 |
| ST8SIA1  | 401092  | 910  | -22 | 911004  | 249912  | 0 | 2  | 1 | 0 | 50 | 80 | 17976576 | 9.14E-01 | 1 |
| EHHADH   | 775543  | 587  | 35  | 1810260 | 537204  | 0 | 3  | 1 | 0 | 13 | 12 | 4893932  | 9.14E-01 | 1 |
| BCKDK    | 1296884 | 351  | 35  | 1051268 | 316840  | 0 | 1  | 1 | 0 | 50 | 76 | 22416964 | 9.14E-01 | 1 |
| IPP      | 972928  | 146  | 29  | 1597016 | 420436  | 0 | 5  | 0 | 0 | 6  | 8  | 1941624  | 9.14E-01 | 1 |
| RPAP1    | 744461  | 166  | 44  | 3437180 | 1131724 | 0 | 10 | 3 | 0 | 12 | 23 | 7923848  | 9.14E-01 | 1 |
| RFFL     | 439420  | 504  | 19  | 934856  | 257032  | 0 | 1  | 0 | 0 | 50 | 60 | 19451840 | 9.15E-01 | 1 |
| LEKR1    | 364723  | 522  | 10  | 1832332 | 439304  | 0 | 3  | 0 | 0 | 6  | 5  | 1975444  | 9.15E-01 | 1 |
| CIRH1A   | 1175833 | 201  | 34  | 1789612 | 482024  | 0 | 3  | 2 | 0 | 46 | 51 | 17751584 | 9.15E-01 | 1 |
| ABCA4    | 512482  | 370  | -2  | 5859760 | 1635464 | 0 | 11 | 6 | 0 | 50 | 42 | 16929580 | 9.15E-01 | 1 |
| FXR1     | 182655  | 1058 | -2  | 1635820 | 425420  | 0 | 4  | 3 | 0 | 13 | 10 | 3725540  | 9.15E-01 | 1 |
| MELK     | 394473  | 231  | 38  | 1726244 | 435388  | 0 | 2  | 1 | 0 | 50 | 44 | 20119340 | 9.15E-01 | 1 |
| ARX      | 252498  | NaN  | 11  | 1349952 | 470988  | 0 | 1  | 1 | 0 | 36 | 36 | 17122888 | 9.15E-01 | 1 |
| SLC39A10 | 104678  | 431  | 3   | 2161988 | 542188  | 0 | 5  | 0 | 0 | 5  | 5  | 1875764  | 9.15E-01 | 1 |
| SNX1     | 742159  | 223  | 45  | 1380568 | 357068  | 0 | 1  | 0 | 0 | 28 | 26 | 13033160 | 9.15E-01 | 1 |
| SLC2A5   | 865627  | 264  | 31  | 1398724 | 429692  | 0 | 2  | 2 | 0 | 50 | 56 | 19512004 | 9.15E-01 | 1 |

|          |         |     |     |         |         |   |    |   |   |    |     |          |          |   |
|----------|---------|-----|-----|---------|---------|---|----|---|---|----|-----|----------|----------|---|
| RTTN     | 64673   | 504 | 37  | 5752960 | 1589540 | 0 | 15 | 4 | 0 | 19 | 26  | 8741580  | 9.15E-01 | 1 |
| PRAMEF18 | NaN     | NaN | NaN | 2397304 | 699896  | 0 | 5  | 4 | 0 | 50 | 120 | 40345480 | 9.15E-01 | 1 |
| GRK4     | 675364  | 336 | 51  | 1544684 | 374512  | 0 | 2  | 0 | 0 | 50 | 48  | 16882588 | 9.15E-01 | 1 |
| PHF23    | 1782958 | 316 | 21  | 1005700 | 305804  | 0 | 1  | 0 | 0 | 39 | 39  | 14081580 | 9.15E-01 | 1 |
| CDR2     | 483001  | 235 | 50  | 1162340 | 312568  | 0 | 1  | 0 | 0 | 50 | 38  | 18234320 | 9.15E-01 | 1 |
| PROKR1   | 260004  | 596 | 12  | 977220  | 287292  | 0 | 1  | 2 | 0 | 50 | 62  | 18294484 | 9.15E-01 | 1 |
| ROM1     | 2695768 | 217 | 42  | 833040  | 303312  | 0 | 1  | 0 | 0 | 17 | 27  | 9232504  | 9.15E-01 | 1 |
| SLC16A10 | 362574  | 424 | 28  | 1288008 | 386616  | 0 | 1  | 0 | 0 | 50 | 49  | 24777244 | 9.15E-01 | 1 |
| RECQL4   | 1755818 | 291 | 7   | 3000012 | 962268  | 0 | 5  | 5 | 0 | 24 | 29  | 10834860 | 9.15E-01 | 1 |
| WBP2     | 1727802 | 178 | 35  | 687436  | 181916  | 0 | 1  | 0 | 0 | 25 | 44  | 12389512 | 9.15E-01 | 1 |
| GFRA1    | 33734   | 913 | -25 | 1206128 | 325384  | 0 | 3  | 1 | 0 | 50 | 89  | 21235400 | 9.15E-01 | 1 |
| PRDM10   | 631721  | 248 | 1   | 3012116 | 829480  | 0 | 7  | 1 | 0 | 1  | 1   | 1209688  | 9.15E-01 | 1 |
| PABPC5   | 8224    | NaN | -28 | 953012  | 274120  | 0 | 3  | 3 | 0 | 18 | 47  | 8523708  | 9.15E-01 | 1 |
| RPS8     | 574317  | 191 | 43  | 550376  | 144892  | 0 | 1  | 1 | 0 | 6  | 14  | 2995384  | 9.15E-01 | 1 |
| CLIC4    | 518507  | 198 | 30  | 664296  | 170880  | 0 | 1  | 1 | 0 | 50 | 93  | 23750540 | 9.15E-01 | 1 |
| MBL2     | 68687   | 786 | -26 | 628696  | 184052  | 0 | 1  | 1 | 0 | 50 | 87  | 21573244 | 9.15E-01 | 1 |
| KCNK18   | 202100  | 640 | 4   | 969388  | 271628  | 0 | 1  | 0 | 0 | 50 | 54  | 19534788 | 9.15E-01 | 1 |
| PKP3     | 1830414 | 344 | 53  | 1961560 | 648632  | 0 | 2  | 0 | 0 | 8  | 14  | 5014972  | 9.15E-01 | 1 |
| HSPH1    | 194024  | 518 | 35  | 2258108 | 566752  | 0 | 7  | 0 | 0 | 12 | 18  | 5832348  | 9.15E-01 | 1 |
| PUM2     | 532255  | 184 | 29  | 2720908 | 774656  | 0 | 7  | 2 | 0 | 34 | 53  | 17017156 | 9.15E-01 | 1 |
| RDH12    | 482264  | 186 | 44  | 793880  | 247420  | 0 | 1  | 1 | 0 | 50 | 59  | 18220436 | 9.15E-01 | 1 |
| PHF10    | 233648  | 447 | 3   | 1320760 | 329300  | 0 | 1  | 2 | 0 | 10 | 6   | 4111800  | 9.15E-01 | 1 |
| GTF3C4   | 1570209 | 581 | 46  | 2071920 | 582060  | 0 | 6  | 3 | 0 | 9  | 12  | 3932376  | 9.16E-01 | 1 |
| CTNNAL1  | 337834  | 433 | 14  | 1926316 | 507656  | 0 | 4  | 2 | 0 | 15 | 15  | 5207924  | 9.16E-01 | 1 |
| FAAH     | 597667  | 255 | 28  | 1465652 | 454612  | 0 | 2  | 1 | 0 | 5  | 5   | 2618024  | 9.16E-01 | 1 |
| ARHGAP2  | NaN     | NaN | NaN | 1741552 | 536492  | 0 | 3  | 2 | 0 | 50 | 118 | 40182076 | 9.16E-01 | 1 |
| ANXA10   | 55532   | 402 | -16 | 881456  | 206836  | 0 | 1  | 1 | 0 | 36 | 34  | 12824544 | 9.16E-01 | 1 |
| KCNMA1   | 116099  | 807 | 3   | 3357436 | 902816  | 0 | 7  | 6 | 0 | 25 | 35  | 8714880  | 9.16E-01 | 1 |
| MFSD10   | 680459  | 336 | 49  | 1122824 | 389464  | 0 | 1  | 1 | 0 | 50 | 44  | 17555428 | 9.16E-01 | 1 |
| SLC27A4  | 1928973 | 188 | 64  | 1626564 | 488076  | 0 | 3  | 0 | 0 | 2  | 1   | 1070492  | 9.16E-01 | 1 |
| NLRP14   | 418263  | 881 | -4  | 2828420 | 723748  | 0 | 6  | 4 | 0 | 50 | 72  | 19642656 | 9.16E-01 | 1 |
| UBE2S    | 1048909 | 399 | 24  | 546816  | 180492  | 0 | 2  | 2 | 0 | 2  | 7   | 1253120  | 9.16E-01 | 1 |
| MICALCL  | 445785  | 318 | -1  | 1747960 | 516200  | 0 | 3  | 2 | 0 | 50 | 64  | 22681472 | 9.16E-01 | 1 |

|          |         |     |     |         |         |   |    |    |   |    |    |          |          |   |
|----------|---------|-----|-----|---------|---------|---|----|----|---|----|----|----------|----------|---|
| DMPK     | 929036  | 203 | 43  | 1811328 | 475260  | 0 | 2  | 0  | 0 | 29 | 28 | 12459288 | 9.16E-01 | 1 |
| TAP1     | 1253457 | 401 | 26  | 1976156 | 658600  | 0 | 3  | 2  | 0 | 17 | 20 | 6165208  | 9.16E-01 | 1 |
| TMUB2    | 930750  | 175 | 41  | 787472  | 261304  | 0 | 1  | 1  | 0 | 50 | 69 | 21793252 | 9.16E-01 | 1 |
| KIAA0226 | 560122  | 252 | 50  | 2551452 | 699540  | 0 | 4  | 1  | 0 | 13 | 16 | 5680336  | 9.16E-01 | 1 |
| BAIAP3   | 1150864 | 215 | 36  | 3038104 | 909224  | 0 | 4  | 0  | 0 | 5  | 2  | 2170176  | 9.16E-01 | 1 |
| ZNF212   | 667346  | 385 | 37  | 1245288 | 363120  | 0 | 1  | 1  | 0 | 50 | 65 | 25807508 | 9.16E-01 | 1 |
| TTLL10   | 2356409 | 196 | 27  | 1734432 | 515844  | 0 | 2  | 0  | 0 | 19 | 29 | 12817424 | 9.16E-01 | 1 |
| KRT9     | 1494501 | 323 | 11  | 1569604 | 461732  | 0 | 3  | 1  | 0 | 20 | 34 | 10955900 | 9.16E-01 | 1 |
| ACE      | 874574  | 267 | -20 | 3535080 | 975084  | 0 | 9  | 1  | 0 | 5  | 11 | 3489868  | 9.16E-01 | 1 |
| OR4D2    | 851306  | 401 | 14  | 746888  | 238876  | 0 | 1  | 1  | 0 | 50 | 68 | 18120400 | 9.16E-01 | 1 |
| USP1     | 239359  | 394 | 5   | 2041660 | 510860  | 0 | 3  | 0  | 0 | 26 | 24 | 10291960 | 9.16E-01 | 1 |
| TYRP1    | 77286   | 530 | -31 | 1373092 | 380564  | 0 | 3  | 0  | 0 | 8  | 12 | 3835188  | 9.16E-01 | 1 |
| CHD5     | 620866  | 240 | 30  | 5110736 | 1330372 | 0 | 15 | 12 | 0 | 10 | 18 | 4330384  | 9.17E-01 | 1 |
| CPNE9    | 955408  | 348 | 34  | 1461736 | 394448  | 0 | 3  | 1  | 0 | 37 | 52 | 16256384 | 9.17E-01 | 1 |
| EWSR1    | 854820  | 251 | 51  | 1796020 | 500180  | 0 | 4  | 0  | 0 | 13 | 21 | 6778952  | 9.17E-01 | 1 |
| SRGAP1   | 320926  | 460 | -13 | 2837676 | 733716  | 0 | 6  | 2  | 0 | 50 | 52 | 20150668 | 9.17E-01 | 1 |
| SIRT2    | 1989663 | 219 | 30  | 1039164 | 274476  | 0 | 1  | 0  | 0 | 50 | 70 | 21843448 | 9.17E-01 | 1 |
| ZNF670   | 379967  | 612 | -15 | 1016024 | 246352  | 0 | 1  | 1  | 0 | 50 | 38 | 15803196 | 9.17E-01 | 1 |
| FCHO2    | 449417  | 440 | 18  | 2149172 | 556072  | 0 | 1  | 1  | 0 | 50 | 40 | 16621996 | 9.17E-01 | 1 |
| RASSF5   | 504163  | 288 | 21  | 1150592 | 345676  | 0 | 1  | 0  | 0 | 11 | 9  | 4776096  | 9.17E-01 | 1 |
| APOBEC3E | 1413709 | 372 | 44  | 1004988 | 254184  | 0 | 4  | 0  | 0 | 0  | 0  | 254184   | 9.17E-01 | 1 |
| WNK1     | 467405  | 289 | 45  | 7100420 | 2254192 | 0 | 20 | 6  | 0 | 16 | 18 | 7482052  | 9.17E-01 | 1 |
| SDSL     | 444479  | 276 | 36  | 825920  | 261304  | 0 | 1  | 1  | 0 | 50 | 61 | 20196236 | 9.17E-01 | 1 |
| CDK5RAP2 | 1183803 | 203 | 21  | 1318624 | 363476  | 0 | 3  | 2  | 0 | 11 | 11 | 3448216  | 9.17E-01 | 1 |
| KLHL8    | 271051  | 327 | 43  | 1597016 | 426844  | 0 | 2  | 1  | 0 | 50 | 54 | 18892564 | 9.17E-01 | 1 |
| SEMA3G   | 1078407 | 229 | 62  | 1955864 | 616948  | 0 | 3  | 1  | 0 | 7  | 6  | 2946256  | 9.17E-01 | 1 |
| IDO2     | 11054   | 414 | 0   | 1090428 | 301176  | 0 | 1  | 1  | 0 | 50 | 46 | 20992964 | 9.17E-01 | 1 |
| TNFSF11  | 188787  | 595 | 67  | 811680  | 224280  | 0 | 1  | 0  | 0 | 45 | 49 | 15618788 | 9.17E-01 | 1 |
| CSF3R    | 581032  | 347 | 31  | 2385912 | 562836  | 0 | 4  | 3  | 0 | 13 | 12 | 6160936  | 9.17E-01 | 1 |
| KRT4     | 1781225 | 288 | 27  | 1503388 | 437168  | 0 | 3  | 2  | 0 | 13 | 20 | 5681404  | 9.17E-01 | 1 |
| TRIM23   | 421173  | 406 | 28  | 1547176 | 409400  | 0 | 5  | 0  | 0 | 0  | 0  | 409400   | 9.17E-01 | 1 |
| PHKA2    | 182760  | NaN | 35  | 3213968 | 882880  | 0 | 8  | 3  | 0 | 9  | 12 | 3889300  | 9.17E-01 | 1 |
| WHSC1L1  | 802555  | 253 | 46  | 3819880 | 976508  | 0 | 9  | 0  | 0 | 1  | 1  | 1437528  | 9.17E-01 | 1 |



|          |         |     |     |         |         |   |    |   |   |    |     |          |          |   |
|----------|---------|-----|-----|---------|---------|---|----|---|---|----|-----|----------|----------|---|
| MAGEB2   | 74310   | NaN | 16  | 795304  | 234248  | 0 | 1  | 0 | 0 | 50 | 67  | 20445436 | 9.17E-01 | 1 |
| JMY      | 166218  | 588 | 35  | 2487728 | 723748  | 0 | 4  | 2 | 0 | 50 | 53  | 17127160 | 9.18E-01 | 1 |
| BAG3     | 731222  | 199 | 48  | 1404776 | 453544  | 0 | 2  | 1 | 0 | 5  | 4   | 1536140  | 9.18E-01 | 1 |
| OR6K2    | 175690  | 966 | 2   | 799932  | 241368  | 0 | 1  | 4 | 0 | 5  | 11  | 1978292  | 9.18E-01 | 1 |
| PSMF1    | 524116  | 527 | 14  | 695624  | 205768  | 0 | 1  | 0 | 0 | 50 | 74  | 20142480 | 9.18E-01 | 1 |
| DDX17    | 1313632 | 177 | 31  | 1864016 | 533644  | 0 | 5  | 1 | 0 | 24 | 36  | 10446464 | 9.18E-01 | 1 |
| PLK4     | 230666  | 331 | 9   | 2518700 | 656464  | 0 | 10 | 0 | 0 | 6  | 17  | 4651496  | 9.18E-01 | 1 |
| ALS2CR11 | 436378  | 491 | 24  | 4848364 | 1207196 | 0 | 2  | 1 | 0 | 3  | 2   | 5115720  | 9.18E-01 | 1 |
| KIR2DL4  | 987531  | 620 | -23 | 972592  | 269492  | 0 | 3  | 0 | 0 | 50 | 135 | 24266740 | 9.18E-01 | 1 |
| LUC7L2   | 545432  | 339 | 30  | 1034892 | 262728  | 0 | 1  | 0 | 0 | 50 | 53  | 20830984 | 9.18E-01 | 1 |
| GOT1     | 277366  | 575 | -5  | 1058032 | 302600  | 0 | 1  | 0 | 0 | 4  | 2   | 1659316  | 9.18E-01 | 1 |
| HS3ST3B1 | 92906   | 944 | -54 | 950164  | 306872  | 0 | 1  | 1 | 0 | 50 | 51  | 16644780 | 9.18E-01 | 1 |
| ST3GAL3  | 939679  | 230 | 33  | 1166256 | 310788  | 0 | 2  | 2 | 0 | 50 | 64  | 18800004 | 9.18E-01 | 1 |
| OR10G4   | 107524  | 830 | -5  | 755788  | 241724  | 0 | 1  | 1 | 0 | 50 | 68  | 19655828 | 9.18E-01 | 1 |
| MAGEA8   | 275638  | NaN | NaN | 792100  | 234248  | 0 | 1  | 1 | 0 | 50 | 75  | 22641244 | 9.18E-01 | 1 |
| GPR183   | NaN     | NaN | NaN | 911360  | 252760  | 0 | 1  | 0 | 0 | 50 | 116 | 39898344 | 9.18E-01 | 1 |
| KRT74    | 1280474 | 464 | 36  | 1343188 | 391244  | 0 | 2  | 1 | 0 | 39 | 54  | 16629472 | 9.18E-01 | 1 |
| AP1M1    | 814131  | 255 | 26  | 1144184 | 304024  | 0 | 1  | 1 | 0 | 50 | 74  | 24987640 | 9.18E-01 | 1 |
| ARHGEF11 | 958228  | 350 | 36  | 4011052 | 1167680 | 0 | 9  | 5 | 0 | 30 | 49  | 14496676 | 9.18E-01 | 1 |
| STRADA   | 1097630 | 319 | 10  | 1179072 | 316128  | 0 | 3  | 2 | 0 | 50 | 76  | 16837376 | 9.18E-01 | 1 |
| GIPC1    | 981470  | 204 | 34  | 829124  | 266644  | 0 | 1  | 1 | 0 | 50 | 72  | 19535500 | 9.18E-01 | 1 |
| ETFDH    | 171388  | 429 | 1   | 1598440 | 432896  | 0 | 2  | 0 | 0 | 50 | 56  | 21491720 | 9.19E-01 | 1 |
| KCNE1    | 381338  | 502 | 16  | 324316  | 96476   | 0 | 1  | 1 | 0 | 1  | 3   | 615880   | 9.19E-01 | 1 |
| PRSS3    | 912856  | 220 | 33  | 802780  | 240656  | 0 | 1  | 0 | 0 | 50 | 68  | 19088364 | 9.19E-01 | 1 |
| ZNF648   | 126238  | 679 | -1  | 1405132 | 422216  | 0 | 2  | 1 | 0 | 50 | 66  | 22135368 | 9.19E-01 | 1 |
| TCTE1    | 1037256 | 312 | 54  | 1240660 | 386972  | 0 | 2  | 2 | 0 | 44 | 60  | 16584260 | 9.19E-01 | 1 |
| NPAS3    | 24372   | 929 | -23 | 2397304 | 703100  | 0 | 4  | 0 | 0 | 7  | 6   | 3072280  | 9.19E-01 | 1 |
| ZGLP1    | 1802015 | 191 | 21  | 669992  | 214312  | 0 | 1  | 1 | 0 | 50 | 98  | 25785436 | 9.19E-01 | 1 |
| FBXW2    | 645088  | 212 | 21  | 1173376 | 310076  | 0 | 3  | 3 | 0 | 10 | 12  | 3383424  | 9.19E-01 | 1 |
| AGBL5    | 1257014 | 290 | 34  | 2279824 | 691352  | 0 | 7  | 1 | 0 | 13 | 18  | 5211128  | 9.19E-01 | 1 |
| ZNF418   | 1252385 | 750 | -19 | 1744044 | 437880  | 0 | 7  | 0 | 0 | 8  | 15  | 3337500  | 9.19E-01 | 1 |
| P2RY8    | NaN     | NaN | NaN | 866504  | 291208  | 0 | 1  | 2 | 0 | 50 | 118 | 39936792 | 9.19E-01 | 1 |
| ASB5     | 134663  | 504 | -4  | 845856  | 239232  | 0 | 1  | 0 | 0 | 22 | 37  | 10362804 | 9.19E-01 | 1 |

|          |         |      |     |         |         |   |    |   |   |    |     |          |          |   |
|----------|---------|------|-----|---------|---------|---|----|---|---|----|-----|----------|----------|---|
| OPN4     | 352918  | 192  | 27  | 1233896 | 378784  | 0 | 1  | 0 | 0 | 41 | 43  | 21038888 | 9.19E-01 | 1 |
| TRMT61B  | 481869  | 238  | 32  | 1217520 | 341760  | 0 | 4  | 4 | 0 | 7  | 10  | 2260956  | 9.19E-01 | 1 |
| ATXN2L   | 1146511 | 221  | 56  | 2890720 | 898544  | 0 | 6  | 2 | 0 | 18 | 35  | 13346440 | 9.19E-01 | 1 |
| RHBDD2   | 1054488 | 218  | 59  | 881456  | 302956  | 0 | 1  | 0 | 0 | 9  | 10  | 3309020  | 9.19E-01 | 1 |
| OR2T12   | 18846   | 936  | -35 | 786048  | 241368  | 0 | 3  | 2 | 0 | 20 | 38  | 5983648  | 9.19E-01 | 1 |
| PTPN14   | 464456  | 404  | -8  | 3039884 | 839092  | 0 | 7  | 1 | 0 | 4  | 12  | 3782856  | 9.19E-01 | 1 |
| FOSB     | 1259254 | 191  | 39  | 825208  | 273764  | 0 | 2  | 3 | 0 | 12 | 19  | 4145620  | 9.19E-01 | 1 |
| TRIM3    | 424837  | 471  | 17  | 1862236 | 571736  | 0 | 2  | 0 | 0 | 7  | 3   | 2390896  | 9.19E-01 | 1 |
| C12orf40 | 72641   | 714  | -20 | 1741908 | 401568  | 0 | 5  | 0 | 0 | 7  | 10  | 3170892  | 9.20E-01 | 1 |
| GRIN1    | 1722012 | 202  | 36  | 2517276 | 719832  | 0 | 5  | 1 | 0 | 3  | 3   | 2037744  | 9.20E-01 | 1 |
| SMG1     | 790295  | 125  | 37  | 9421896 | 2576016 | 0 | 17 | 4 | 0 | 8  | 9   | 5309740  | 9.20E-01 | 1 |
| CD72     | 1202125 | 248  | 37  | 932720  | 254896  | 0 | 1  | 0 | 0 | 50 | 57  | 20786840 | 9.20E-01 | 1 |
| ADORA2B  | 931951  | 350  | -33 | 810968  | 260236  | 0 | 1  | 1 | 0 | 50 | 81  | 22960220 | 9.20E-01 | 1 |
| NEIL3    | 53396   | 746  | -20 | 1571740 | 408332  | 0 | 3  | 3 | 0 | 14 | 20  | 6477776  | 9.20E-01 | 1 |
| EPB42    | 834640  | 330  | 43  | 1833756 | 532932  | 0 | 3  | 1 | 0 | 42 | 56  | 19474980 | 9.20E-01 | 1 |
| ROBO2    | 22183   | 1224 | -17 | 3604144 | 920972  | 0 | 17 | 9 | 0 | 14 | 23  | 4833768  | 9.20E-01 | 1 |
| SLC9A3   | 787824  | 367  | 29  | 2092924 | 650768  | 0 | 5  | 6 | 0 | 8  | 11  | 2447144  | 9.20E-01 | 1 |
| SLC12A9  | 1339207 | 433  | 48  | 2195452 | 791744  | 0 | 4  | 1 | 0 | 17 | 24  | 8713456  | 9.20E-01 | 1 |
| FASTKD2  | 206970  | 816  | 1   | 1845148 | 479888  | 0 | 3  | 1 | 0 | 50 | 64  | 21632340 | 9.20E-01 | 1 |
| ZNF562   | 776094  | 617  | -51 | 1114636 | 274832  | 0 | 3  | 0 | 0 | 50 | 124 | 30214788 | 9.20E-01 | 1 |
| RECQL    | 518837  | 836  | -23 | 1724108 | 418300  | 0 | 4  | 1 | 0 | 50 | 62  | 16740900 | 9.20E-01 | 1 |
| MAPK7    | 630769  | 332  | 11  | 1983276 | 660024  | 0 | 3  | 2 | 0 | 50 | 72  | 28508124 | 9.20E-01 | 1 |
| TLN1     | 1062287 | 163  | 43  | 6427936 | 1955864 | 0 | 12 | 3 | 0 | 9  | 13  | 6219320  | 9.20E-01 | 1 |
| TCTN2    | 871640  | 315  | 40  | 1817380 | 491636  | 0 | 8  | 1 | 0 | 2  | 2   | 919192   | 9.20E-01 | 1 |
| CES1     | 317734  | 581  | -28 | 1465296 | 413316  | 0 | 3  | 2 | 0 | 31 | 61  | 17363900 | 9.20E-01 | 1 |
| ZNF654   | 123235  | 894  | -3  | 1498404 | 370596  | 0 | 2  | 0 | 0 | 50 | 48  | 17285580 | 9.20E-01 | 1 |
| BRAP     | 591444  | 191  | 32  | 1553584 | 393380  | 0 | 3  | 2 | 0 | 50 | 64  | 19456468 | 9.20E-01 | 1 |
| PAPPA    | 69253   | 553  | -19 | 4148112 | 1157712 | 0 | 11 | 6 | 0 | 50 | 55  | 19799652 | 9.21E-01 | 1 |
| SAG      | 419346  | 227  | 28  | 1077612 | 287292  | 0 | 1  | 0 | 0 | 50 | 57  | 24239328 | 9.21E-01 | 1 |
| LENG1    | 735613  | 439  | -53 | 662872  | 205412  | 0 | 1  | 1 | 0 | 50 | 119 | 29395632 | 9.21E-01 | 1 |
| PHF13    | 628180  | 259  | 38  | 765044  | 212176  | 0 | 1  | 1 | 0 | 46 | 63  | 18237524 | 9.21E-01 | 1 |
| SCRN2    | 1071489 | 214  | 29  | 1079392 | 330368  | 0 | 2  | 3 | 0 | 12 | 13  | 4017104  | 9.21E-01 | 1 |
| TSPAN15  | 660613  | 400  | 40  | 761128  | 213956  | 0 | 2  | 2 | 0 | 5  | 16  | 3262028  | 9.21E-01 | 1 |

|         |         |      |     |         |         |   |    |   |   |    |     |          |          |   |
|---------|---------|------|-----|---------|---------|---|----|---|---|----|-----|----------|----------|---|
| GRB7    | 1448852 | 226  | 36  | 1367752 | 399788  | 0 | 2  | 0 | 0 | 50 | 82  | 28058140 | 9.21E-01 | 1 |
| REV3L   | 343769  | 434  | 41  | 8015340 | 2148816 | 0 | 18 | 6 | 0 | 16 | 23  | 9150624  | 9.21E-01 | 1 |
| CNTFR   | 843127  | 370  | 55  | 940552  | 287648  | 0 | 1  | 0 | 0 | 41 | 39  | 13720596 | 9.21E-01 | 1 |
| KLF15   | 181307  | 600  | 34  | 1022076 | 322536  | 0 | 1  | 0 | 0 | 50 | 52  | 18741620 | 9.21E-01 | 1 |
| COL4A3  | 253951  | 211  | 10  | 4295496 | 1355292 | 0 | 10 | 3 | 0 | 28 | 29  | 10585660 | 9.21E-01 | 1 |
| HDGFRP2 | 2094827 | 278  | 40  | 1737992 | 485584  | 0 | 3  | 1 | 0 | 50 | 65  | 21272780 | 9.21E-01 | 1 |
| FBL     | 1289328 | 526  | 23  | 818088  | 249912  | 0 | 1  | 1 | 0 | 50 | 79  | 21241096 | 9.21E-01 | 1 |
| RNF170  | 513134  | 475  | 32  | 847280  | 231400  | 0 | 1  | 0 | 0 | 50 | 79  | 25125412 | 9.21E-01 | 1 |
| DDX3Y   | 0       | 0    | 0   | 1740840 | 449628  | 0 | 1  | 0 | 0 | 50 | 39  | 21173456 | 9.21E-01 | 1 |
| SLC4A1  | 1009890 | 175  | 40  | 2292284 | 710932  | 0 | 3  | 0 | 0 | 2  | 1   | 1480248  | 9.21E-01 | 1 |
| KPNA6   | 1351816 | 218  | 27  | 1394808 | 383412  | 0 | 2  | 1 | 0 | 50 | 66  | 22560432 | 9.21E-01 | 1 |
| HSD11B2 | 1115833 | 153  | 42  | 979000  | 338912  | 0 | 1  | 1 | 0 | 50 | 65  | 24004012 | 9.21E-01 | 1 |
| SFXN3   | 744964  | 188  | 46  | 841584  | 245640  | 0 | 1  | 1 | 0 | 28 | 30  | 10248884 | 9.21E-01 | 1 |
| DCHS2   | 63258   | 1024 | 3   | 9134248 | 2693852 | 0 | 34 | 9 | 0 | 4  | 11  | 4155232  | 9.21E-01 | 1 |
| CPT1B   | 1073094 | 203  | 43  | 2012824 | 545036  | 0 | 2  | 1 | 0 | 9  | 11  | 4009272  | 9.21E-01 | 1 |
| DRP2    | 417357  | NaN  | 26  | 2494848 | 668568  | 0 | 4  | 2 | 0 | 50 | 57  | 24871228 | 9.21E-01 | 1 |
| ANKLE1  | 865138  | 212  | 38  | 1502676 | 505164  | 0 | 2  | 0 | 0 | 14 | 13  | 5317572  | 9.21E-01 | 1 |
| FAM65B  | 430274  | 256  | 26  | 2759356 | 770384  | 0 | 4  | 3 | 0 | 13 | 20  | 6987212  | 9.21E-01 | 1 |
| KCNH5   | 68312   | 704  | -32 | 2556792 | 690996  | 0 | 10 | 2 | 0 | 8  | 12  | 2975804  | 9.21E-01 | 1 |
| SCNN1D  | 1744013 | 273  | 28  | 1776440 | 544324  | 0 | 4  | 2 | 0 | 9  | 14  | 4108596  | 9.21E-01 | 1 |
| IFT80   | 427333  | 617  | 9   | 2058392 | 515488  | 0 | 6  | 0 | 0 | 1  | 1   | 693844   | 9.22E-01 | 1 |
| ANGPTL1 | NaN     | NaN  | NaN | 1271988 | 321468  | 0 | 2  | 1 | 0 | 50 | 117 | 39967052 | 9.22E-01 | 1 |
| NBPF9   | NaN     | NaN  | NaN | 2493780 | 613032  | 0 | 3  | 2 | 0 | 50 | 118 | 40258616 | 9.22E-01 | 1 |
| STK39   | 135182  | 980  | -1  | 1441444 | 380564  | 0 | 2  | 0 | 0 | 7  | 11  | 4453204  | 9.22E-01 | 1 |
| TFAP2E  | 1049488 | 388  | 34  | 1072628 | 372376  | 0 | 2  | 1 | 0 | 14 | 17  | 4776096  | 9.22E-01 | 1 |
| CCHCR1  | 3364017 | 401  | 19  | 2208980 | 657532  | 0 | 11 | 6 | 0 | 4  | 9   | 1440732  | 9.22E-01 | 1 |
| MMP20   | 530118  | 436  | 17  | 1256680 | 334640  | 0 | 2  | 2 | 0 | 50 | 55  | 17536916 | 9.22E-01 | 1 |
| FOXI3   | NaN     | NaN  | NaN | 996800  | 355288  | 0 | 1  | 1 | 0 | 50 | 117 | 40000872 | 9.22E-01 | 1 |
| C5orf49 | 65781   | 1013 | -18 | 375224  | 107512  | 0 | 1  | 1 | 0 | 2  | 4   | 754720   | 9.22E-01 | 1 |
| CMAS    | 605789  | 955  | -13 | 1116416 | 309364  | 0 | 1  | 3 | 0 | 5  | 9   | 2369892  | 9.22E-01 | 1 |
| RPS6KA5 | 410309  | 521  | 27  | 2097196 | 548240  | 0 | 7  | 2 | 0 | 3  | 5   | 1833044  | 9.22E-01 | 1 |
| NSMCE4A | 249185  | 396  | 25  | 1010328 | 271272  | 0 | 1  | 0 | 0 | 23 | 21  | 8816340  | 9.22E-01 | 1 |
| MDGA1   | 359430  | 461  | 50  | 2400508 | 730868  | 0 | 4  | 1 | 0 | 40 | 62  | 21993680 | 9.22E-01 | 1 |

|          |         |     |     |         |         |   |    |   |   |    |    |          |          |   |
|----------|---------|-----|-----|---------|---------|---|----|---|---|----|----|----------|----------|---|
| CCDC142  | 1044697 | 315 | 48  | 1819160 | 598792  | 0 | 4  | 1 | 0 | 50 | 77 | 21769756 | 9.22E-01 | 1 |
| APOF     | 2869106 | 184 | 52  | 801356  | 252760  | 0 | 1  | 0 | 0 | 23 | 47 | 14312980 | 9.22E-01 | 1 |
| IFIT1B   | 253827  | 213 | 17  | 1211824 | 316484  | 0 | 1  | 0 | 0 | 44 | 34 | 14070544 | 9.22E-01 | 1 |
| SPZ1     | 316792  | 617 | 34  | 1114636 | 266288  | 0 | 1  | 0 | 0 | 25 | 34 | 12940244 | 9.22E-01 | 1 |
| WDR48    | 226944  | 500 | 25  | 1789968 | 461376  | 0 | 2  | 1 | 0 | 50 | 41 | 18734500 | 9.22E-01 | 1 |
| CSTF2    | 341945  | NaN | 21  | 1476688 | 432896  | 0 | 5  | 2 | 0 | 1  | 3  | 1165900  | 9.22E-01 | 1 |
| PARP15   | 419536  | 311 | 44  | 1799580 | 498756  | 0 | 2  | 1 | 0 | 50 | 52 | 23137864 | 9.22E-01 | 1 |
| SNX21    | 742720  | 180 | 48  | 964760  | 308296  | 0 | 1  | 1 | 0 | 50 | 49 | 15404476 | 9.22E-01 | 1 |
| BMP2K    | 234707  | 489 | 30  | 3022440 | 803136  | 0 | 8  | 1 | 0 | 5  | 11 | 3023864  | 9.22E-01 | 1 |
| SUV420H2 | 1028808 | 209 | 19  | 1129588 | 383768  | 0 | 2  | 0 | 0 | 2  | 0  | 629052   | 9.23E-01 | 1 |
| ASB16    | 930750  | 175 | 41  | 1314352 | 254540  | 0 | 2  | 1 | 0 | 50 | 69 | 21793252 | 9.23E-01 | 1 |
| MRPS2    | 298554  | 539 | 14  | 743328  | 223212  | 0 | 1  | 1 | 0 | 50 | 72 | 20768328 | 9.23E-01 | 1 |
| MEF2B    | 1260413 | 215 | 35  | 1053048 | 272340  | 0 | 2  | 1 | 0 | 50 | 63 | 16455388 | 9.23E-01 | 1 |
| NUFIP1   | 685617  | 360 | 32  | 1302604 | 327164  | 0 | 2  | 0 | 0 | 9  | 16 | 5761148  | 9.23E-01 | 1 |
| LPCAT1   | 557296  | 390 | 37  | 1359208 | 410468  | 0 | 3  | 2 | 0 | 21 | 32 | 8425808  | 9.23E-01 | 1 |
| KCNG2    | 323907  | 509 | -22 | 1095056 | 404416  | 0 | 2  | 2 | 0 | 33 | 73 | 17692844 | 9.23E-01 | 1 |
| NEFL     | 180048  | 521 | -2  | 1372024 | 386972  | 0 | 2  | 2 | 0 | 21 | 14 | 6475284  | 9.23E-01 | 1 |
| RRM2B    | 504282  | 507 | 33  | 1148812 | 297260  | 0 | 2  | 0 | 0 | 50 | 86 | 24565068 | 9.23E-01 | 1 |
| DOCK4    | 133354  | 718 | -18 | 5177308 | 1342832 | 0 | 15 | 5 | 0 | 12 | 24 | 7108964  | 9.23E-01 | 1 |
| CSTF1    | 254679  | 672 | -43 | 1101464 | 304024  | 0 | 2  | 0 | 0 | 33 | 67 | 17771520 | 9.23E-01 | 1 |
| LRRC25   | 1384225 | 259 | 42  | 743328  | 241368  | 0 | 1  | 2 | 0 | 21 | 32 | 9187648  | 9.23E-01 | 1 |
| INVS     | 246802  | 735 | 19  | 2726604 | 757212  | 0 | 6  | 2 | 0 | 48 | 60 | 22374956 | 9.23E-01 | 1 |
| CYP19A1  | 263003  | 535 | 17  | 1317556 | 335708  | 0 | 1  | 1 | 0 | 42 | 40 | 19095128 | 9.23E-01 | 1 |
| CYP11A1  | 641004  | 222 | 46  | 1332508 | 374156  | 0 | 1  | 1 | 0 | 50 | 62 | 22671504 | 9.23E-01 | 1 |
| KREMEN2  | 1443513 | 234 | 49  | 1182632 | 334996  | 0 | 1  | 0 | 0 | 14 | 11 | 5039180  | 9.23E-01 | 1 |
| PKD2     | 435445  | 367 | 21  | 2476336 | 690284  | 0 | 4  | 1 | 0 | 50 | 51 | 21623440 | 9.23E-01 | 1 |
| BAIAP2   | 1727896 | 243 | 16  | 1507304 | 417232  | 0 | 3  | 2 | 0 | 50 | 93 | 26971628 | 9.23E-01 | 1 |
| GPR68    | 251273  | 462 | 42  | 888576  | 284088  | 0 | 4  | 3 | 0 | 5  | 7  | 1318624  | 9.23E-01 | 1 |
| GSPT1    | 564730  | 294 | 51  | 1659316 | 444644  | 0 | 2  | 0 | 0 | 2  | 0  | 920616   | 9.23E-01 | 1 |
| FAM124B  | 310772  | 460 | 12  | 1205416 | 359204  | 0 | 1  | 0 | 0 | 45 | 37 | 17693912 | 9.23E-01 | 1 |
| CCNO     | 217401  | 417 | 22  | 845856  | 287292  | 0 | 1  | 0 | 0 | 8  | 10 | 3136004  | 9.23E-01 | 1 |
| PLCD3    | 819156  | 170 | 30  | 1985768 | 604132  | 0 | 5  | 3 | 0 | 50 | 86 | 25371052 | 9.23E-01 | 1 |
| REPS2    | 291898  | NaN | 23  | 1699188 | 491280  | 0 | 3  | 0 | 0 | 3  | 8  | 2605208  | 9.23E-01 | 1 |

|          |         |      |     |          |         |   |    |   |   |    |    |          |          |   |
|----------|---------|------|-----|----------|---------|---|----|---|---|----|----|----------|----------|---|
| OR4D6    | 430021  | 507  | -1  | 770740   | 237452  | 0 | 2  | 3 | 0 | 8  | 24 | 4424012  | 9.23E-01 | 1 |
| ATP6V0D2 | 192441  | 1158 | -20 | 920972   | 235672  | 0 | 1  | 0 | 0 | 50 | 69 | 21910020 | 9.23E-01 | 1 |
| ZNF709   | 1754294 | 593  | 0   | 1679608  | 390176  | 0 | 3  | 0 | 0 | 19 | 33 | 11978688 | 9.24E-01 | 1 |
| CLCA2    | 248812  | 762  | -13 | 2417240  | 662872  | 0 | 4  | 1 | 0 | 34 | 37 | 11546860 | 9.24E-01 | 1 |
| CMYA5    | 263588  | 684  | 38  | 10210792 | 2882888 | 0 | 23 | 9 | 0 | 49 | 58 | 21072352 | 9.24E-01 | 1 |
| ANO6     | 313473  | 719  | 1   | 2642588  | 669280  | 0 | 6  | 1 | 0 | 15 | 30 | 10215776 | 9.24E-01 | 1 |
| SIK2     | 426569  | 296  | 19  | 2354228  | 675688  | 0 | 5  | 2 | 0 | 3  | 3  | 1435748  | 9.24E-01 | 1 |
| ESRRB    | 243524  | 616  | 39  | 1291568  | 373444  | 0 | 3  | 1 | 0 | 13 | 17 | 4618744  | 9.24E-01 | 1 |
| NYX      | 590228  | NaN  | 54  | 1125672  | 422928  | 0 | 2  | 1 | 0 | 12 | 24 | 6562860  | 9.24E-01 | 1 |
| DYTN     | 269047  | 832  | 14  | 1495200  | 406908  | 0 | 3  | 2 | 0 | 50 | 51 | 16973724 | 9.24E-01 | 1 |
| GNS      | 441663  | 484  | 28  | 1436104  | 391244  | 0 | 1  | 1 | 0 | 30 | 20 | 11449672 | 9.24E-01 | 1 |
| EMILIN1  | 1214097 | 238  | 50  | 2439312  | 849060  | 0 | 4  | 0 | 0 | 6  | 4  | 2593460  | 9.24E-01 | 1 |
| ATP6V0A4 | 310803  | 385  | 7   | 2206844  | 573160  | 0 | 8  | 0 | 0 | 0  | 0  | 573160   | 9.24E-01 | 1 |
| TXK      | 219787  | 358  | 39  | 1411896  | 341760  | 0 | 6  | 3 | 0 | 3  | 11 | 1857964  | 9.24E-01 | 1 |
| PKNOX1   | 434727  | 131  | 65  | 1137776  | 305092  | 0 | 2  | 1 | 0 | 50 | 78 | 21346116 | 9.24E-01 | 1 |
| SLC16A13 | 1696302 | 360  | 24  | 1007124  | 373800  | 0 | 1  | 1 | 0 | 50 | 49 | 16256384 | 9.24E-01 | 1 |
| HEPHL1   | 363497  | 702  | -19 | 3010692  | 787116  | 0 | 13 | 3 | 0 | 12 | 12 | 3883960  | 9.24E-01 | 1 |
| BSND     | 454766  | 217  | 13  | 817732   | 223568  | 0 | 1  | 0 | 0 | 50 | 78 | 23577168 | 9.24E-01 | 1 |
| TMEM214  | 1257014 | 290  | 34  | 1758640  | 520472  | 0 | 3  | 5 | 0 | 10 | 13 | 3564984  | 9.24E-01 | 1 |
| ZDHHC18  | 1022828 | 188  | 30  | 974016   | 304380  | 0 | 1  | 0 | 0 | 40 | 52 | 15503088 | 9.24E-01 | 1 |
| GRIN2D   | 1448469 | 209  | 38  | 3227496  | 1107516 | 0 | 7  | 7 | 0 | 12 | 33 | 9799256  | 9.24E-01 | 1 |
| ANKRD49  | 341083  | 589  | -7  | 615168   | 162336  | 0 | 1  | 2 | 0 | 27 | 33 | 7208644  | 9.24E-01 | 1 |
| SLC9A5   | 1155617 | 142  | 51  | 2247784  | 692420  | 0 | 6  | 2 | 0 | 1  | 2  | 946248   | 9.24E-01 | 1 |
| DCTN1    | 1086740 | 343  | 42  | 3284100  | 956928  | 0 | 6  | 2 | 0 | 13 | 15 | 5534020  | 9.24E-01 | 1 |
| CAMSAP1  | 721697  | 446  | 46  | 4057332  | 1147032 | 0 | 8  | 3 | 0 | 50 | 58 | 23359652 | 9.24E-01 | 1 |
| ARHGEF5  | 189369  | 838  | 0   | 3979012  | 1200788 | 0 | 7  | 1 | 0 | 17 | 14 | 7283404  | 9.24E-01 | 1 |
| TIA1     | 667934  | 164  | 33  | 1037384  | 253828  | 0 | 1  | 0 | 0 | 50 | 55 | 21301616 | 9.24E-01 | 1 |
| CBWD5    | 176193  | NaN  | -8  | 939128   | 228196  | 0 | 1  | 0 | 0 | 50 | 72 | 23175244 | 9.24E-01 | 1 |
| UTS2R    | 2598845 | 179  | 36  | 895696   | 352796  | 0 | 1  | 1 | 0 | 50 | 59 | 20440452 | 9.24E-01 | 1 |
| SCMH1    | 287585  | 346  | 25  | 1807056  | 498756  | 0 | 4  | 3 | 0 | 21 | 24 | 8498788  | 9.24E-01 | 1 |
| CCDC132  | 260737  | 785  | 8   | 2608412  | 643648  | 0 | 8  | 0 | 0 | 1  | 2  | 1084376  | 9.24E-01 | 1 |
| PABPC1   | 1141833 | 276  | 41  | 1650772  | 448916  | 0 | 5  | 2 | 0 | 21 | 45 | 11348924 | 9.25E-01 | 1 |
| HFE      | 408919  | 685  | 43  | 900324   | 239232  | 0 | 4  | 1 | 0 | 1  | 1  | 411536   | 9.25E-01 | 1 |

|          |         |      |     |         |         |   |    |   |   |    |     |          |          |   |
|----------|---------|------|-----|---------|---------|---|----|---|---|----|-----|----------|----------|---|
| MSH6     | 488225  | 587  | 32  | 3448216 | 955148  | 0 | 9  | 3 | 0 | 15 | 21  | 5630496  | 9.25E-01 | 1 |
| KIAA1217 | 136799  | 839  | -15 | 4920276 | 1393740 | 0 | 14 | 4 | 0 | 12 | 23  | 7186572  | 9.25E-01 | 1 |
| CHRNA1   | 414231  | 577  | 21  | 1246356 | 341760  | 0 | 2  | 1 | 0 | 50 | 72  | 22389196 | 9.25E-01 | 1 |
| ACTR5    | 358558  | 551  | 35  | 1538988 | 445356  | 0 | 2  | 2 | 0 | 16 | 12  | 5068728  | 9.25E-01 | 1 |
| OR11H6   | 371813  | 563  | -29 | 807052  | 252404  | 0 | 1  | 0 | 0 | 47 | 62  | 18578928 | 9.25E-01 | 1 |
| ENTPD3   | 195830  | 611  | 18  | 1369532 | 371308  | 0 | 3  | 2 | 0 | 34 | 31  | 9178748  | 9.25E-01 | 1 |
| FAM181B  | 303563  | 599  | -7  | 998224  | 369884  | 0 | 1  | 1 | 0 | 25 | 29  | 11152412 | 9.25E-01 | 1 |
| KCTD13   | NaN     | NaN  | NaN | 817020  | 261660  | 0 | 2  | 3 | 0 | 8  | 19  | 4187628  | 9.25E-01 | 1 |
| EFTUD2   | 1101543 | 172  | 28  | 2546112 | 686724  | 0 | 6  | 5 | 0 | 50 | 74  | 17295192 | 9.25E-01 | 1 |
| SLC5A10  | 661956  | 198  | 16  | 1538632 | 487364  | 0 | 4  | 0 | 0 | 2  | 5   | 1405488  | 9.25E-01 | 1 |
| ATAD3C   | 1725369 | 187  | 27  | 1058032 | 309008  | 0 | 2  | 0 | 0 | 50 | 87  | 21566480 | 9.25E-01 | 1 |
| ALDH3B1  | 1357582 | 356  | 31  | 1174088 | 360628  | 0 | 2  | 0 | 0 | 50 | 65  | 20667936 | 9.25E-01 | 1 |
| KLF1     | 1937827 | 226  | 32  | 872912  | 300820  | 0 | 1  | 0 | 0 | 38 | 53  | 16981556 | 9.25E-01 | 1 |
| MMP2     | 129512  | 538  | -28 | 1723040 | 451408  | 0 | 7  | 4 | 0 | 13 | 40  | 7496648  | 9.25E-01 | 1 |
| NOBOX    | 185754  | 838  | -7  | 1429340 | 442864  | 0 | 3  | 2 | 0 | 50 | 64  | 21600656 | 9.25E-01 | 1 |
| ALG6     | 133567  | 477  | 2   | 1336424 | 346744  | 0 | 3  | 0 | 0 | 2  | 1   | 848704   | 9.25E-01 | 1 |
| TBX18    | 28205   | 623  | -12 | 1511576 | 466360  | 0 | 3  | 3 | 0 | 32 | 51  | 15456096 | 9.25E-01 | 1 |
| ZNF30    | 903994  | 549  | -57 | 1620512 | 399076  | 0 | 4  | 1 | 0 | 36 | 106 | 25699640 | 9.25E-01 | 1 |
| PIAS2    | 152679  | 618  | 42  | 1673200 | 455324  | 0 | 1  | 0 | 0 | 8  | 4   | 3779652  | 9.25E-01 | 1 |
| SLC2A8   | 700547  | 270  | 42  | 1183700 | 388396  | 0 | 1  | 0 | 0 | 16 | 21  | 7354960  | 9.25E-01 | 1 |
| PTGR2    | 502038  | 155  | 50  | 925244  | 241012  | 0 | 1  | 0 | 0 | 50 | 57  | 19811400 | 9.25E-01 | 1 |
| PAK7     | 93375   | 786  | -46 | 1830196 | 510860  | 0 | 3  | 1 | 0 | 7  | 5   | 2489508  | 9.25E-01 | 1 |
| IL2RA    | 613453  | 373  | 40  | 730868  | 173728  | 0 | 1  | 1 | 0 | 8  | 13  | 3958364  | 9.25E-01 | 1 |
| PRSS54   | 742919  | 385  | 13  | 1011040 | 279104  | 0 | 2  | 2 | 0 | 10 | 13  | 3310088  | 9.25E-01 | 1 |
| OR51V1   | 109545  | 1056 | -1  | 794592  | 236028  | 0 | 3  | 3 | 0 | 5  | 3   | 786048   | 9.25E-01 | 1 |
| RPS6KA2  | 235623  | 646  | 9   | 2019588 | 555360  | 0 | 5  | 4 | 0 | 9  | 11  | 2928100  | 9.25E-01 | 1 |
| IQGAP3   | 2095354 | 166  | 39  | 4189052 | 1200076 | 0 | 10 | 4 | 0 | 11 | 21  | 6972972  | 9.25E-01 | 1 |
| PAX8     | 633218  | 385  | 36  | 1127096 | 231400  | 0 | 1  | 1 | 0 | 23 | 20  | 9556108  | 9.25E-01 | 1 |
| DIS3L2   | 497951  | 464  | 30  | 2287300 | 636884  | 0 | 4  | 0 | 0 | 9  | 7   | 3130308  | 9.25E-01 | 1 |
| PDGFRB   | 1065098 | 228  | 49  | 2820588 | 820224  | 0 | 4  | 1 | 0 | 8  | 5   | 2610192  | 9.25E-01 | 1 |
| EFHC2    | 75979   | NaN  | 21  | 1976156 | 488788  | 0 | 3  | 1 | 0 | 50 | 57  | 20924968 | 9.26E-01 | 1 |
| SLC16A5  | 1311590 | 159  | 28  | 1248136 | 394448  | 0 | 3  | 3 | 0 | 42 | 79  | 20822440 | 9.26E-01 | 1 |
| PEX1     | 750974  | 369  | 28  | 3305104 | 909224  | 0 | 9  | 2 | 0 | 24 | 29  | 11433652 | 9.26E-01 | 1 |

|          |         |      |     |          |         |   |    |    |   |    |    |          |          |   |
|----------|---------|------|-----|----------|---------|---|----|----|---|----|----|----------|----------|---|
| SCD      | 1162653 | 171  | 42  | 919904   | 254896  | 0 | 1  | 1  | 0 | 50 | 67 | 22016464 | 9.26E-01 | 1 |
| OTOP1    | 178901  | 584  | 34  | 1517272  | 470276  | 0 | 2  | 1  | 0 | 50 | 56 | 20578936 | 9.26E-01 | 1 |
| SLC44A3  | 329970  | 274  | -13 | 1699900  | 457460  | 0 | 3  | 1  | 0 | 50 | 55 | 20286660 | 9.26E-01 | 1 |
| GRK6     | 1038665 | 261  | 59  | 1556432  | 407620  | 0 | 3  | 1  | 0 | 50 | 73 | 23403440 | 9.26E-01 | 1 |
| OTOA     | 520295  | 466  | 45  | 2981500  | 836600  | 0 | 2  | 2  | 0 | 16 | 15 | 7900708  | 9.26E-01 | 1 |
| KIF11    | 347309  | 312  | 20  | 2754728  | 721612  | 0 | 3  | 0  | 0 | 6  | 7  | 4777164  | 9.26E-01 | 1 |
| EPHA8    | 407931  | 541  | 25  | 2661100  | 813104  | 0 | 9  | 6  | 0 | 6  | 9  | 2709516  | 9.26E-01 | 1 |
| NLGN3    | 759088  | NaN  | 27  | 2105028  | 640800  | 0 | 3  | 1  | 0 | 47 | 69 | 24709248 | 9.26E-01 | 1 |
| NDUFS1   | 311488  | 433  | 24  | 1886088  | 523320  | 0 | 4  | 0  | 0 | 3  | 3  | 1603780  | 9.26E-01 | 1 |
| ZNF318   | 1262275 | 273  | 43  | 5652568  | 1693136 | 0 | 16 | 5  | 0 | 27 | 43 | 12797844 | 9.26E-01 | 1 |
| OR5L1    | 4183    | 1091 | -36 | 763620   | 236028  | 0 | 1  | 3  | 0 | 14 | 26 | 3895352  | 9.26E-01 | 1 |
| FOXC1    | 145123  | 487  | 20  | 1338560  | 436456  | 0 | 1  | 2  | 0 | 49 | 44 | 19665440 | 9.26E-01 | 1 |
| OR9A2    | 314565  | 676  | -1  | 769672   | 226772  | 0 | 1  | 0  | 0 | 50 | 59 | 16752292 | 9.26E-01 | 1 |
| CDC40    | 132627  | 636  | 19  | 1542192  | 378072  | 0 | 3  | 1  | 0 | 50 | 62 | 20629844 | 9.26E-01 | 1 |
| GPKOW    | 833689  | NaN  | 41  | 1209332  | 363832  | 0 | 2  | 0  | 0 | 50 | 74 | 21714932 | 9.26E-01 | 1 |
| BMP2     | 44205   | 385  | -10 | 992884   | 287648  | 0 | 1  | 1  | 0 | 41 | 48 | 18142472 | 9.26E-01 | 1 |
| SH2D3A   | 736129  | 272  | 27  | 1407268  | 479888  | 0 | 2  | 2  | 0 | 50 | 67 | 24524840 | 9.26E-01 | 1 |
| ETV2     | 1162794 | 390  | 27  | 864724   | 262016  | 0 | 1  | 0  | 0 | 50 | 66 | 20625572 | 9.26E-01 | 1 |
| DNAH7    | 105357  | 518  | -3  | 10462128 | 2709516 | 0 | 34 | 10 | 0 | 10 | 20 | 7344992  | 9.26E-01 | 1 |
| SMO      | 811174  | 420  | 54  | 1963340  | 608404  | 0 | 5  | 2  | 0 | 50 | 74 | 21498128 | 9.26E-01 | 1 |
| ATP8B3   | 2180359 | 206  | 29  | 3385916  | 949096  | 0 | 6  | 6  | 0 | 38 | 58 | 16575360 | 9.27E-01 | 1 |
| CTAGE4   | 215477  | 711  | -8  | 3907456  | 1082240 | 0 | 2  | 0  | 0 | 6  | 2  | 3916000  | 9.27E-01 | 1 |
| ZNF638   | 328513  | 459  | 19  | 5112516  | 1339272 | 0 | 13 | 2  | 0 | 7  | 12 | 5061608  | 9.27E-01 | 1 |
| C17orf50 | 675201  | 196  | 3   | 438948   | 132432  | 0 | 1  | 2  | 0 | 5  | 8  | 1611612  | 9.27E-01 | 1 |
| ITSN1    | 921622  | 370  | 44  | 4498060  | 1190108 | 0 | 13 | 3  | 0 | 50 | 80 | 26037840 | 9.27E-01 | 1 |
| BECN1    | 1633092 | 190  | 33  | 1197228  | 296904  | 0 | 1  | 0  | 0 | 24 | 22 | 8134244  | 9.27E-01 | 1 |
| ABCB8    | 622098  | 373  | 41  | 1777864  | 592028  | 0 | 3  | 2  | 0 | 50 | 65 | 25140720 | 9.27E-01 | 1 |
| RHBDD3   | 854820  | 251  | 51  | 914920   | 346388  | 0 | 1  | 0  | 0 | 50 | 60 | 20958788 | 9.27E-01 | 1 |
| FKBP15   | 448462  | 456  | 9   | 3147396  | 876828  | 0 | 7  | 2  | 0 | 15 | 19 | 7552896  | 9.27E-01 | 1 |
| OR4K15   | 420010  | 827  | -51 | 847636   | 268424  | 0 | 1  | 2  | 0 | 50 | 72 | 16673972 | 9.27E-01 | 1 |
| HGSNAT   | 277447  | 559  | 6   | 1640448  | 472056  | 0 | 3  | 3  | 0 | 50 | 72 | 22875492 | 9.27E-01 | 1 |
| FARS2    | 127934  | 845  | 28  | 1161272  | 312568  | 0 | 1  | 1  | 0 | 35 | 45 | 16983336 | 9.27E-01 | 1 |
| LILRA4   | 742939  | 507  | -9  | 1254900  | 379140  | 0 | 3  | 1  | 0 | 50 | 62 | 17969100 | 9.27E-01 | 1 |

|         |         |      |     |         |        |   |   |   |   |    |     |          |          |   |
|---------|---------|------|-----|---------|--------|---|---|---|---|----|-----|----------|----------|---|
| LRCH1   | 284604  | 798  | 49  | 2077972 | 571736 | 0 | 3 | 1 | 0 | 30 | 23  | 10011076 | 9.27E-01 | 1 |
| AP4B1   | 335231  | 545  | 13  | 1885020 | 530796 | 0 | 4 | 1 | 0 | 50 | 60  | 19779004 | 9.27E-01 | 1 |
| MAGEH1  | 140844  | NaN  | -23 | 543612  | 161268 | 0 | 1 | 1 | 0 | 50 | 113 | 23871224 | 9.27E-01 | 1 |
| LTK     | 782552  | 166  | 40  | 2191892 | 660736 | 0 | 2 | 2 | 0 | 50 | 49  | 16541184 | 9.27E-01 | 1 |
| GBE1    | 54244   | 720  | 0   | 1849420 | 467072 | 0 | 2 | 1 | 0 | 38 | 33  | 15329004 | 9.27E-01 | 1 |
| KCTD18  | 542097  | 378  | 26  | 1074408 | 319332 | 0 | 1 | 1 | 0 | 39 | 34  | 14275956 | 9.27E-01 | 1 |
| DNMT3A  | 330147  | 286  | 43  | 2475268 | 677468 | 0 | 6 | 3 | 0 | 50 | 59  | 20174164 | 9.27E-01 | 1 |
| MTPAP   | 91344   | 331  | 12  | 1495200 | 409044 | 0 | 2 | 0 | 0 | 50 | 59  | 21246792 | 9.27E-01 | 1 |
| ICA1L   | 600089  | 387  | 25  | 1293348 | 318264 | 0 | 5 | 3 | 0 | 9  | 17  | 3601652  | 9.27E-01 | 1 |
| FAM71D  | 479620  | 324  | 19  | 1085444 | 299752 | 0 | 1 | 1 | 0 | 6  | 6   | 3123188  | 9.27E-01 | 1 |
| CLPB    | 755787  | 258  | 56  | 1814888 | 524032 | 0 | 1 | 3 | 0 | 50 | 60  | 20431552 | 9.27E-01 | 1 |
| CDH5    | 479049  | 262  | -20 | 1992532 | 569600 | 0 | 8 | 5 | 0 | 10 | 23  | 4474208  | 9.27E-01 | 1 |
| NR4A2   | 117105  | 440  | 4   | 1516560 | 428268 | 0 | 4 | 3 | 0 | 24 | 22  | 6529396  | 9.28E-01 | 1 |
| RASSF10 | 267963  | 398  | 10  | 1475264 | 502672 | 0 | 1 | 0 | 0 | 50 | 58  | 23954172 | 9.28E-01 | 1 |
| TULP1   | 683460  | 280  | 36  | 1400148 | 401568 | 0 | 1 | 1 | 0 | 50 | 60  | 24068092 | 9.28E-01 | 1 |
| TMEM8A  | 1549307 | 207  | 37  | 1917772 | 606980 | 0 | 3 | 2 | 0 | 36 | 55  | 20238956 | 9.28E-01 | 1 |
| CAST    | 394245  | 345  | 33  | 2216812 | 585620 | 0 | 3 | 1 | 0 | 29 | 22  | 9653652  | 9.28E-01 | 1 |
| ITLN1   | 1048810 | 583  | 27  | 824140  | 211820 | 0 | 2 | 3 | 0 | 21 | 34  | 6982584  | 9.28E-01 | 1 |
| SRMS    | 1262904 | 298  | 54  | 1222860 | 378072 | 0 | 5 | 0 | 0 | 3  | 6   | 1057320  | 9.28E-01 | 1 |
| TK1     | 527017  | 217  | 27  | 604844  | 173728 | 0 | 2 | 2 | 0 | 9  | 36  | 5477416  | 9.28E-01 | 1 |
| SLC30A5 | 420762  | 273  | 29  | 2045220 | 567108 | 0 | 1 | 1 | 0 | 50 | 64  | 24108320 | 9.28E-01 | 1 |
| WHAMM   | 476426  | 631  | 23  | 2036320 | 597368 | 0 | 3 | 0 | 0 | 3  | 1   | 1278752  | 9.28E-01 | 1 |
| PPCDC   | 887844  | 262  | 43  | 530440  | 147740 | 0 | 1 | 2 | 0 | 5  | 6   | 1521188  | 9.28E-01 | 1 |
| STK17A  | 655380  | 310  | 23  | 1065864 | 289428 | 0 | 1 | 0 | 0 | 50 | 63  | 25441896 | 9.28E-01 | 1 |
| STAP2   | 2122615 | 220  | 27  | 1164476 | 332860 | 0 | 2 | 3 | 0 | 21 | 45  | 12772568 | 9.28E-01 | 1 |
| KCNB1   | 1002860 | 392  | 54  | 2139560 | 616948 | 0 | 6 | 3 | 0 | 50 | 78  | 21344692 | 9.28E-01 | 1 |
| ZNF727  | NaN     | NaN  | NaN | 1306164 | 306516 | 0 | 2 | 0 | 0 | 50 | 116 | 39952100 | 9.28E-01 | 1 |
| DEF6    | 682809  | 264  | 39  | 1624072 | 445712 | 0 | 3 | 0 | 0 | 50 | 86  | 25287392 | 9.28E-01 | 1 |
| GJD3    | 1220026 | 191  | 23  | 689572  | 255608 | 0 | 1 | 0 | 0 | 14 | 22  | 5859760  | 9.28E-01 | 1 |
| SVIP    | 52085   | 1031 | 2   | 207904  | 56960  | 0 | 1 | 1 | 0 | 1  | 2   | 292632   | 9.28E-01 | 1 |
| CCIN    | 858124  | 257  | 46  | 1462448 | 426844 | 0 | 2 | 2 | 0 | 50 | 67  | 23320136 | 9.28E-01 | 1 |
| CHRM3   | 52023   | 1031 | -25 | 1472772 | 425064 | 0 | 4 | 2 | 0 | 50 | 127 | 28184520 | 9.28E-01 | 1 |
| CSTF3   | 588753  | 326  | 16  | 1987548 | 493416 | 0 | 3 | 0 | 0 | 28 | 31  | 12066976 | 9.28E-01 | 1 |



|          |         |     |     |          |         |   |    |   |   |    |     |          |          |   |
|----------|---------|-----|-----|----------|---------|---|----|---|---|----|-----|----------|----------|---|
| GPR12    | 173793  | 619 | 18  | 810612   | 267000  | 0 | 1  | 1 | 0 | 50 | 48  | 14299096 | 9.28E-01 | 1 |
| PELI3    | 1941577 | 194 | 51  | 1159848  | 374868  | 0 | 1  | 0 | 0 | 26 | 24  | 10661844 | 9.29E-01 | 1 |
| OR6C1    | 667726  | 802 | -14 | 776792   | 224992  | 0 | 2  | 3 | 0 | 8  | 13  | 2615888  | 9.29E-01 | 1 |
| ZAN      | 1483965 | 336 | 46  | 7206508  | 2073344 | 0 | 19 | 8 | 0 | 10 | 24  | 9680352  | 9.29E-01 | 1 |
| KRT26    | 836683  | 269 | -10 | 1205060  | 329656  | 0 | 3  | 1 | 0 | 22 | 26  | 7229292  | 9.29E-01 | 1 |
| LSM2     | 2509866 | 183 | 32  | 257032   | 67640   | 0 | 2  | 1 | 0 | 1  | 1   | 198648   | 9.29E-01 | 1 |
| COL9A3   | 1044503 | 208 | 48  | 1730872  | 598436  | 0 | 1  | 2 | 0 | 50 | 65  | 20186624 | 9.29E-01 | 1 |
| MAP2K7   | 952640  | 320 | 27  | 1087580  | 302956  | 0 | 3  | 2 | 0 | 18 | 34  | 7729828  | 9.29E-01 | 1 |
| SLC22A15 | 589216  | 538 | 9   | 1394808  | 407976  | 0 | 2  | 1 | 0 | 50 | 62  | 20343264 | 9.29E-01 | 1 |
| WDR27    | 197890  | 593 | -17 | 2215032  | 636528  | 0 | 2  | 0 | 0 | 4  | 2   | 2213964  | 9.29E-01 | 1 |
| ARNTL    | 296688  | 414 | 13  | 1654688  | 437524  | 0 | 3  | 1 | 0 | 16 | 24  | 7786076  | 9.29E-01 | 1 |
| PRKDC    | 902699  | 459 | 27  | 10754760 | 2838744 | 0 | 27 | 7 | 0 | 5  | 9   | 3861176  | 9.29E-01 | 1 |
| ZNF571   | 279768  | 914 | -61 | 1591320  | 375936  | 0 | 3  | 1 | 0 | 50 | 63  | 18808548 | 9.29E-01 | 1 |
| TTC16    | 1098647 | 172 | 32  | 2233900  | 624068  | 0 | 7  | 1 | 0 | 4  | 5   | 1521544  | 9.29E-01 | 1 |
| PNKD     | 732698  | 197 | 35  | 1265224  | 397652  | 0 | 1  | 1 | 0 | 50 | 47  | 21819596 | 9.29E-01 | 1 |
| AHRR     | 808969  | 399 | 34  | 1830196  | 571736  | 0 | 3  | 0 | 0 | 28 | 36  | 15015012 | 9.29E-01 | 1 |
| SDF4     | 2356409 | 196 | 27  | 1035960  | 272340  | 0 | 1  | 1 | 0 | 39 | 53  | 20819592 | 9.29E-01 | 1 |
| SLC6A2   | 130705  | 565 | -32 | 1710224  | 487720  | 0 | 4  | 1 | 0 | 50 | 106 | 22384568 | 9.29E-01 | 1 |
| KCTD2    | 1111289 | 171 | 31  | 665364   | 203988  | 0 | 1  | 0 | 0 | 50 | 75  | 17336132 | 9.29E-01 | 1 |
| SPDYE6   | NaN     | NaN | NaN | 1050556  | 270560  | 0 | 1  | 0 | 0 | 50 | 116 | 39916144 | 9.29E-01 | 1 |
| WIZ      | 524410  | 481 | 33  | 1921688  | 655396  | 0 | 4  | 1 | 0 | 9  | 22  | 7155956  | 9.29E-01 | 1 |
| TMPPE    | 513008  | 372 | 33  | 1096836  | 357780  | 0 | 1  | 1 | 0 | 50 | 53  | 21203360 | 9.29E-01 | 1 |
| UBA7     | 1306720 | 191 | 39  | 2566048  | 779996  | 0 | 5  | 1 | 0 | 5  | 7   | 2686376  | 9.29E-01 | 1 |
| PAX2     | 1089188 | 481 | 19  | 1221080  | 322180  | 0 | 2  | 3 | 0 | 26 | 24  | 7561084  | 9.29E-01 | 1 |
| ADRA2B   | 792336  | 366 | 41  | 1077256  | 358136  | 0 | 1  | 2 | 0 | 50 | 64  | 25935668 | 9.29E-01 | 1 |
| ACAA2    | 290591  | 530 | 35  | 1020652  | 292988  | 0 | 1  | 1 | 0 | 50 | 50  | 19363908 | 9.29E-01 | 1 |
| LIPJ     | 160462  | 318 | 32  | 983984   | 229264  | 0 | 1  | 0 | 0 | 50 | 54  | 20094064 | 9.29E-01 | 1 |
| TRAF6    | 98751   | 412 | -8  | 1358496  | 342828  | 0 | 1  | 1 | 0 | 50 | 46  | 20659036 | 9.29E-01 | 1 |
| ZNF821   | 468594  | 163 | 28  | 939484   | 270560  | 0 | 1  | 0 | 0 | 14 | 22  | 6992908  | 9.29E-01 | 1 |
| ENOX1    | 99614   | 523 | 36  | 1694916  | 428268  | 0 | 4  | 2 | 0 | 50 | 66  | 20138564 | 9.29E-01 | 1 |
| LDB2     | 55867   | 983 | 2   | 1070136  | 276612  | 0 | 6  | 2 | 0 | 1  | 3   | 512284   | 9.29E-01 | 1 |
| SOX3     | 24994   | NaN | -22 | 1058388  | 373800  | 0 | 1  | 0 | 0 | 12 | 17  | 6367060  | 9.29E-01 | 1 |
| FAM188B  | 410182  | 538 | 21  | 1949812  | 553580  | 0 | 5  | 3 | 0 | 9  | 30  | 7540792  | 9.29E-01 | 1 |

|          |         |      |     |          |         |   |    |    |   |    |     |          |          |   |
|----------|---------|------|-----|----------|---------|---|----|----|---|----|-----|----------|----------|---|
| NPEPPS   | 1229549 | 176  | 18  | 2394456  | 647208  | 0 | 5  | 0  | 0 | 5  | 3   | 1870068  | 9.30E-01 | 1 |
| PTHLH    | 315469  | 581  | -4  | 449984   | 135280  | 0 | 3  | 3  | 0 | 5  | 8   | 873268   | 9.30E-01 | 1 |
| GRK7     | 426724  | 406  | 30  | 1396944  | 390888  | 0 | 3  | 3  | 0 | 15 | 15  | 4383072  | 9.30E-01 | 1 |
| FAM13C   | 121813  | 707  | -15 | 1534716  | 400500  | 0 | 3  | 1  | 0 | 27 | 63  | 18602424 | 9.30E-01 | 1 |
| JAK2     | 255685  | 634  | 28  | 2997164  | 731224  | 0 | 6  | 1  | 0 | 6  | 10  | 2672136  | 9.30E-01 | 1 |
| UBXN1    | 2425755 | 248  | 51  | 799220   | 233536  | 0 | 2  | 2  | 0 | 8  | 12  | 2683884  | 9.30E-01 | 1 |
| KY       | 221323  | 459  | 13  | 1716988  | 448916  | 0 | 2  | 1  | 0 | 50 | 55  | 20313004 | 9.30E-01 | 1 |
| NXPH4    | 2162032 | 238  | 58  | 744396   | 249912  | 0 | 1  | 0  | 0 | 50 | 84  | 24087316 | 9.30E-01 | 1 |
| ZNF74    | 606391  | 351  | 4   | 1633684  | 449984  | 0 | 2  | 2  | 0 | 50 | 57  | 22041384 | 9.30E-01 | 1 |
| PCK2     | 992350  | 355  | 19  | 1682100  | 506232  | 0 | 2  | 0  | 0 | 5  | 5   | 2775732  | 9.30E-01 | 1 |
| FGG      | 59962   | 1036 | -4  | 1215384  | 291564  | 0 | 6  | 3  | 0 | 1  | 4   | 915632   | 9.30E-01 | 1 |
| RNF175   | 143076  | 685  | 18  | 868284   | 220008  | 0 | 1  | 1  | 0 | 50 | 60  | 18833468 | 9.30E-01 | 1 |
| SGK223   | 132314  | 199  | 43  | 3426144  | 1086156 | 0 | 7  | 5  | 0 | 50 | 69  | 20107236 | 9.30E-01 | 1 |
| MCM3AP   | 857856  | 624  | 60  | 5005004  | 1459600 | 0 | 16 | 3  | 0 | 0  | 3   | 1459600  | 9.30E-01 | 1 |
| RPAP2    | 363408  | 559  | 0   | 1611968  | 406552  | 0 | 3  | 2  | 0 | 32 | 48  | 14701732 | 9.30E-01 | 1 |
| TSPAN32  | 990037  | 630  | 25  | 819512   | 247420  | 0 | 2  | 0  | 0 | 50 | 84  | 21586060 | 9.30E-01 | 1 |
| OR11H1   | 69794   | 916  | -70 | 808476   | 237096  | 0 | 3  | 3  | 0 | 7  | 31  | 4401940  | 9.30E-01 | 1 |
| KRT6B    | 1194800 | 389  | 29  | 1422576  | 423996  | 0 | 3  | 1  | 0 | 50 | 64  | 18116128 | 9.30E-01 | 1 |
| C6orf89  | 836025  | 244  | 43  | 926312   | 241012  | 0 | 2  | 2  | 0 | 20 | 33  | 7678920  | 9.30E-01 | 1 |
| DES      | 604261  | 335  | 38  | 1194736  | 350660  | 0 | 1  | 1  | 0 | 50 | 56  | 19025352 | 9.30E-01 | 1 |
| ADAMTS8  | 693280  | 382  | -6  | 2199368  | 686368  | 0 | 5  | 1  | 0 | 3  | 5   | 1922756  | 9.30E-01 | 1 |
| PGLYRP2  | 524410  | 481  | 33  | 1390892  | 477040  | 0 | 2  | 2  | 0 | 50 | 79  | 23624160 | 9.30E-01 | 1 |
| RIMBP2   | 225009  | 632  | -35 | 2660032  | 786404  | 0 | 10 | 8  | 0 | 5  | 13  | 2487016  | 9.30E-01 | 1 |
| SNAP91   | 181148  | 734  | -28 | 2320052  | 708796  | 0 | 5  | 0  | 0 | 2  | 10  | 3389476  | 9.31E-01 | 1 |
| KIRREL3  | 311236  | 849  | 9   | 2067648  | 608760  | 0 | 3  | 4  | 0 | 50 | 70  | 18721684 | 9.31E-01 | 1 |
| DST      | 403209  | 446  | 23  | 17452544 | 4428640 | 0 | 37 | 12 | 0 | 7  | 19  | 7453572  | 9.31E-01 | 1 |
| LHX5     | 444269  | 468  | 25  | 1013176  | 295124  | 0 | 1  | 0  | 0 | 16 | 19  | 7720572  | 9.31E-01 | 1 |
| KIAA1257 | 1149132 | 379  | 52  | 1073696  | 269848  | 0 | 2  | 0  | 0 | 50 | 74  | 19642300 | 9.31E-01 | 1 |
| TRIM46   | 1801444 | 194  | 32  | 1876832  | 598792  | 0 | 6  | 3  | 0 | 50 | 85  | 19936000 | 9.31E-01 | 1 |
| PAPSS2   | 379125  | 169  | 46  | 1596660  | 441084  | 0 | 2  | 3  | 0 | 50 | 40  | 16055244 | 9.31E-01 | 1 |
| AHCTF1   | 422581  | 405  | 4   | 5833060  | 1610900 | 0 | 10 | 3  | 0 | 39 | 24  | 14074460 | 9.31E-01 | 1 |
| MRPL2    | 1239021 | 301  | 42  | 763264   | 242792  | 0 | 1  | 0  | 0 | 50 | 105 | 29539812 | 9.31E-01 | 1 |
| SLC12A3  | 785707  | 125  | 37  | 2656828  | 755432  | 0 | 3  | 2  | 0 | 8  | 9   | 5309740  | 9.31E-01 | 1 |

|           |         |     |     |         |         |   |    |   |   |    |     |          |          |   |
|-----------|---------|-----|-----|---------|---------|---|----|---|---|----|-----|----------|----------|---|
| SNX3      | 336217  | 451 | 42  | 421148  | 113920  | 0 | 2  | 1 | 0 | 1  | 3   | 513352   | 9.31E-01 | 1 |
| NOL8      | 527573  | 574 | 45  | 3058752 | 751872  | 0 | 8  | 1 | 0 | 27 | 32  | 10821332 | 9.31E-01 | 1 |
| EYA1      | 50979   | 967 | -3  | 1579572 | 421860  | 0 | 4  | 3 | 0 | 50 | 90  | 21137500 | 9.31E-01 | 1 |
| CHRM1     | 2342595 | 181 | 71  | 1113924 | 367392  | 0 | 1  | 0 | 0 | 32 | 47  | 15722384 | 9.31E-01 | 1 |
| STK24     | 513130  | 468 | 59  | 1192956 | 319332  | 0 | 2  | 0 | 0 | 19 | 23  | 6959800  | 9.31E-01 | 1 |
| IGSF3     | 691376  | 359 | 23  | 3053056 | 882524  | 0 | 5  | 0 | 0 | 1  | 2   | 1573520  | 9.31E-01 | 1 |
| PTGER3    | 130184  | 907 | -19 | 1211824 | 370952  | 0 | 5  | 1 | 0 | 4  | 8   | 1823432  | 9.31E-01 | 1 |
| MBD4      | 917611  | 355 | 56  | 1506592 | 384836  | 0 | 4  | 3 | 0 | 50 | 67  | 16013236 | 9.31E-01 | 1 |
| FANCE     | 683460  | 280 | 36  | 1334644 | 424352  | 0 | 2  | 2 | 0 | 15 | 26  | 5361716  | 9.31E-01 | 1 |
| CAD       | 1238919 | 230 | 39  | 5579588 | 1736212 | 0 | 11 | 5 | 0 | 13 | 18  | 6024232  | 9.31E-01 | 1 |
| CAPN12    | 1697047 | 322 | 45  | 1850132 | 542188  | 0 | 2  | 2 | 0 | 50 | 82  | 22226860 | 9.31E-01 | 1 |
| MAGEE1    | 55359   | NaN | -19 | 2312932 | 756500  | 0 | 5  | 1 | 0 | 10 | 24  | 6209352  | 9.31E-01 | 1 |
| SLC12A8   | 372775  | 150 | 47  | 1803852 | 542544  | 0 | 2  | 2 | 0 | 50 | 38  | 16603128 | 9.31E-01 | 1 |
| GRAMD1E   | 684637  | 439 | 15  | 1954796 | 494128  | 0 | 3  | 2 | 0 | 50 | 56  | 19966260 | 9.31E-01 | 1 |
| KCNS1     | 865186  | 324 | 46  | 1275548 | 425776  | 0 | 2  | 3 | 0 | 20 | 39  | 11157396 | 9.31E-01 | 1 |
| RBM12B    | 221692  | 552 | -4  | 2519412 | 695268  | 0 | 6  | 0 | 0 | 2  | 2   | 1297976  | 9.32E-01 | 1 |
| MTCH1     | 832054  | 220 | 41  | 950164  | 291920  | 0 | 1  | 1 | 0 | 50 | 65  | 22074136 | 9.32E-01 | 1 |
| FMR1      | 96476   | NaN | -6  | 1742264 | 354220  | 0 | 1  | 1 | 0 | 50 | 73  | 22840960 | 9.32E-01 | 1 |
| CYP2J2    | 60418   | 824 | -6  | 1297976 | 349948  | 0 | 2  | 0 | 0 | 5  | 6   | 2479540  | 9.32E-01 | 1 |
| UGT2B7    | 21319   | 782 | 12  | 1368820 | 352796  | 0 | 1  | 1 | 0 | 50 | 51  | 21244300 | 9.32E-01 | 1 |
| EGR2      | 176901  | 852 | 32  | 1148812 | 388040  | 0 | 1  | 2 | 0 | 43 | 60  | 20312292 | 9.32E-01 | 1 |
| CTNS      | 504736  | 354 | 20  | 1055540 | 294412  | 0 | 1  | 1 | 0 | 50 | 62  | 23395252 | 9.32E-01 | 1 |
| MBOAT7    | 735613  | 439 | -53 | 1200432 | 347100  | 0 | 3  | 2 | 0 | 50 | 119 | 29395632 | 9.32E-01 | 1 |
| MYCBPAF   | 1432761 | 200 | 22  | 2529380 | 705592  | 0 | 9  | 2 | 0 | 2  | 5   | 1209332  | 9.32E-01 | 1 |
| NCAPH2    | 1075525 | 207 | 42  | 1625496 | 440016  | 0 | 2  | 0 | 0 | 5  | 6   | 2060528  | 9.32E-01 | 1 |
| EIF4ENIF1 | 750597  | 313 | 19  | 2509800 | 729444  | 0 | 9  | 2 | 0 | 2  | 5   | 1343900  | 9.32E-01 | 1 |
| C1RL      | 2422791 | 224 | 38  | 1236032 | 351016  | 0 | 2  | 2 | 0 | 14 | 22  | 6719500  | 9.32E-01 | 1 |
| HCFC2     | 1209623 | 156 | 26  | 2034184 | 567464  | 0 | 3  | 0 | 0 | 11 | 12  | 5088664  | 9.32E-01 | 1 |
| TBCK      | 176206  | 606 | 7   | 2350312 | 620864  | 0 | 6  | 0 | 0 | 0  | 0   | 620864   | 9.32E-01 | 1 |
| FRMD4B    | 222480  | 432 | 12  | 2698836 | 711288  | 0 | 4  | 0 | 0 | 1  | 0   | 885728   | 9.32E-01 | 1 |
| USP3      | 617922  | 178 | 42  | 1389824 | 339268  | 0 | 4  | 2 | 0 | 3  | 6   | 1752232  | 9.32E-01 | 1 |
| SH2D4A    | 145909  | 265 | -11 | 1228556 | 314704  | 0 | 3  | 1 | 0 | 4  | 4   | 1390536  | 9.32E-01 | 1 |
| MR1       | 201966  | 253 | 23  | 881812  | 237452  | 0 | 2  | 3 | 0 | 6  | 11  | 2681392  | 9.32E-01 | 1 |

|          |         |     |     |         |         |   |    |   |   |    |    |          |          |   |
|----------|---------|-----|-----|---------|---------|---|----|---|---|----|----|----------|----------|---|
| DDR1     | 2223866 | 223 | 25  | 2307236 | 713068  | 0 | 3  | 0 | 0 | 18 | 18 | 8274152  | 9.32E-01 | 1 |
| OR10G9   | 107524  | 830 | -5  | 755788  | 241724  | 0 | 1  | 1 | 0 | 50 | 68 | 19655828 | 9.32E-01 | 1 |
| KRT2     | 1441383 | 464 | 29  | 1603780 | 483092  | 0 | 4  | 3 | 0 | 50 | 83 | 20991896 | 9.32E-01 | 1 |
| TCEB3    | 960799  | 225 | 28  | 2049136 | 555716  | 0 | 3  | 1 | 0 | 50 | 55 | 20574664 | 9.32E-01 | 1 |
| NPTXR    | 1317460 | 358 | 54  | 1204704 | 417588  | 0 | 2  | 2 | 0 | 50 | 65 | 18953440 | 9.32E-01 | 1 |
| CHRNA    | 286805  | 211 | 36  | 1309012 | 399788  | 0 | 2  | 1 | 0 | 15 | 19 | 4104324  | 9.32E-01 | 1 |
| SF3A1    | 696089  | 214 | 57  | 2044864 | 565328  | 0 | 4  | 4 | 0 | 23 | 37 | 9595268  | 9.33E-01 | 1 |
| FNTA     | 304258  | 559 | 12  | 1008548 | 245284  | 0 | 1  | 0 | 0 | 50 | 59 | 21217244 | 9.33E-01 | 1 |
| DGKG     | 664709  | 533 | 32  | 2107164 | 528660  | 0 | 12 | 4 | 0 | 2  | 4  | 958352   | 9.33E-01 | 1 |
| BOP1     | NaN     | NaN | NaN | 1889648 | 572092  | 0 | 5  | 5 | 0 | 26 | 45 | 12149212 | 9.33E-01 | 1 |
| ZNF275   | 840610  | NaN | 19  | 849772  | 224636  | 0 | 2  | 1 | 0 | 2  | 2  | 797084   | 9.33E-01 | 1 |
| IFT172   | 1218835 | 179 | 39  | 4581008 | 1231048 | 0 | 15 | 1 | 0 | 4  | 6  | 2618380  | 9.33E-01 | 1 |
| DTX4     | 542222  | 686 | 9   | 1542548 | 478108  | 0 | 3  | 3 | 0 | 11 | 18 | 5612340  | 9.33E-01 | 1 |
| GAB4     | 156217  | 639 | -95 | 1462804 | 417944  | 0 | 5  | 3 | 0 | 21 | 35 | 7979740  | 9.33E-01 | 1 |
| CD48     | 1156068 | 634 | 26  | 628340  | 168388  | 0 | 1  | 2 | 0 | 29 | 48 | 11074448 | 9.33E-01 | 1 |
| CRTP10   | 874480  | 461 | 25  | 927024  | 268068  | 0 | 2  | 3 | 0 | 8  | 6  | 1620512  | 9.33E-01 | 1 |
| MAST2    | 1003923 | 416 | 24  | 4500196 | 1385552 | 0 | 9  | 1 | 0 | 1  | 3  | 2286232  | 9.33E-01 | 1 |
| PRMT5    | 1177534 | 225 | 34  | 1712360 | 467428  | 0 | 4  | 0 | 0 | 4  | 6  | 2075480  | 9.33E-01 | 1 |
| FZD9     | 904644  | 399 | 48  | 1422576 | 474192  | 0 | 2  | 3 | 0 | 48 | 71 | 23446160 | 9.33E-01 | 1 |
| KCNG1    | 449718  | 474 | 23  | 1251696 | 403704  | 0 | 2  | 1 | 0 | 9  | 11 | 3779652  | 9.33E-01 | 1 |
| SNX5     | 756104  | 499 | 29  | 1087580 | 267712  | 0 | 1  | 0 | 0 | 50 | 68 | 23326188 | 9.33E-01 | 1 |
| FHL2     | 198241  | 215 | 13  | 748312  | 170168  | 0 | 1  | 3 | 0 | 7  | 6  | 1887868  | 9.33E-01 | 1 |
| ZDHHC2   | 223323  | 568 | 3   | 988968  | 241368  | 0 | 1  | 0 | 0 | 50 | 51 | 18682880 | 9.34E-01 | 1 |
| ROS1     | 168682  | 310 | -18 | 6082972 | 1619444 | 0 | 21 | 2 | 0 | 2  | 7  | 3435756  | 9.34E-01 | 1 |
| SYNJ2    | 478315  | 208 | 44  | 3801724 | 1105736 | 0 | 9  | 2 | 0 | 11 | 11 | 4009984  | 9.34E-01 | 1 |
| NOL10    | 804107  | 344 | 32  | 1846928 | 446068  | 0 | 3  | 1 | 0 | 50 | 50 | 19580356 | 9.34E-01 | 1 |
| OR11L1   | 87551   | 993 | -35 | 788896  | 245996  | 0 | 2  | 1 | 0 | 31 | 88 | 16315480 | 9.34E-01 | 1 |
| WDR43    | 478715  | 398 | 26  | 1785340 | 461732  | 0 | 4  | 0 | 0 | 2  | 0  | 582416   | 9.34E-01 | 1 |
| OR2M7    | 18846   | 936 | -35 | 774300  | 227484  | 0 | 3  | 2 | 0 | 20 | 38 | 5983648  | 9.34E-01 | 1 |
| GLRA2    | 78081   | NaN | 18  | 1239236 | 323248  | 0 | 3  | 3 | 0 | 9  | 13 | 3195812  | 9.34E-01 | 1 |
| ZMYM3    | 728738  | NaN | 25  | 3522620 | 991816  | 0 | 7  | 2 | 0 | 23 | 43 | 13991156 | 9.34E-01 | 1 |
| RAPGEFL1 | 1502125 | 165 | 37  | 1184768 | 334996  | 0 | 2  | 3 | 0 | 15 | 40 | 11108268 | 9.34E-01 | 1 |
| PREB     | 1214097 | 238 | 50  | 1045216 | 328232  | 0 | 1  | 0 | 0 | 50 | 60 | 22743060 | 9.34E-01 | 1 |

|          |         |      |     |         |         |   |    |    |   |    |     |          |          |   |
|----------|---------|------|-----|---------|---------|---|----|----|---|----|-----|----------|----------|---|
| TMEM39B  | 1242874 | 218  | 24  | 1245288 | 368460  | 0 | 2  | 2  | 0 | 14 | 25  | 7848020  | 9.34E-01 | 1 |
| CRISPLD2 | 444452  | 243  | 21  | 1315776 | 339624  | 0 | 1  | 2  | 0 | 28 | 19  | 9715240  | 9.34E-01 | 1 |
| GKN2     | 340835  | 327  | 14  | 486652  | 127448  | 0 | 1  | 2  | 0 | 3  | 4   | 1019228  | 9.34E-01 | 1 |
| PLA2R1   | 260653  | 401  | 24  | 3890724 | 930228  | 0 | 13 | 2  | 0 | 6  | 6   | 2532940  | 9.34E-01 | 1 |
| NCEH1    | 314731  | 235  | 20  | 1122824 | 332860  | 0 | 3  | 4  | 0 | 6  | 10  | 2866156  | 9.34E-01 | 1 |
| GAPDHS   | 1081638 | 390  | 41  | 1041300 | 311856  | 0 | 2  | 1  | 0 | 50 | 73  | 18185192 | 9.34E-01 | 1 |
| TRIP11   | 336377  | 375  | 30  | 5165916 | 1263444 | 0 | 9  | 1  | 0 | 13 | 14  | 6578524  | 9.34E-01 | 1 |
| ADRA1B   | 206270  | 458  | 31  | 1255968 | 417588  | 0 | 1  | 0  | 0 | 38 | 48  | 19035320 | 9.34E-01 | 1 |
| COL4A2   | 521715  | 478  | 32  | 4296208 | 1393028 | 0 | 8  | 2  | 0 | 4  | 7   | 3588480  | 9.34E-01 | 1 |
| OR8D2    | 154391  | 921  | -14 | 762908  | 235672  | 0 | 1  | 1  | 0 | 8  | 10  | 3157720  | 9.34E-01 | 1 |
| CSMD1    | 10896   | 1290 | -36 | 9055216 | 2462096 | 0 | 25 | 6  | 0 | 4  | 7   | 3455336  | 9.34E-01 | 1 |
| RTL1     | 356726  | 585  | -24 | 3352452 | 1006056 | 0 | 7  | 1  | 0 | 5  | 4   | 2397304  | 9.34E-01 | 1 |
| KRT39    | 977588  | 404  | 10  | 1255612 | 348524  | 0 | 4  | 2  | 0 | 50 | 68  | 14276668 | 9.34E-01 | 1 |
| UGT2B15  | 106841  | NaN  | -2  | 2749744 | 702032  | 0 | 5  | 1  | 0 | 8  | 9   | 3725184  | 9.34E-01 | 1 |
| PCDHGB1  | 662513  | 568  | 2   | 2292640 | 714848  | 0 | 6  | 4  | 0 | 50 | 85  | 24954176 | 9.34E-01 | 1 |
| PIP4K2C  | 1347795 | 303  | 44  | 1097192 | 297616  | 0 | 6  | 3  | 0 | 2  | 3   | 717340   | 9.35E-01 | 1 |
| SLFN12   | 763419  | 456  | 18  | 1491284 | 376648  | 0 | 2  | 1  | 0 | 50 | 58  | 19205844 | 9.35E-01 | 1 |
| SRRM2    | 1717244 | 210  | 42  | 6529396 | 2351024 | 0 | 30 | 14 | 0 | 37 | 66  | 18539056 | 9.35E-01 | 1 |
| NEU1     | 2485614 | 188  | 36  | 1034180 | 320044  | 0 | 1  | 2  | 0 | 36 | 35  | 13374208 | 9.35E-01 | 1 |
| NUP214   | 759063  | 213  | 46  | 5194040 | 1655044 | 0 | 10 | 2  | 0 | 7  | 10  | 4578516  | 9.35E-01 | 1 |
| DDX6     | 1493911 | 154  | 36  | 1269140 | 332860  | 0 | 3  | 0  | 0 | 9  | 25  | 6129608  | 9.35E-01 | 1 |
| SNTB2    | 1187512 | NaN  | 32  | 1332508 | 428624  | 0 | 2  | 1  | 0 | 39 | 44  | 14280584 | 9.35E-01 | 1 |
| EPM2A    | 76860   | 748  | -3  | 858672  | 252048  | 0 | 1  | 1  | 0 | 8  | 12  | 4123548  | 9.35E-01 | 1 |
| IGJ      | 262444  | 609  | 19  | 416876  | 108580  | 0 | 1  | 1  | 0 | 1  | 1   | 443932   | 9.35E-01 | 1 |
| SLC23A1  | 832127  | 177  | 48  | 1522256 | 471700  | 0 | 1  | 2  | 0 | 50 | 77  | 20769396 | 9.35E-01 | 1 |
| TESK1    | 1202125 | 248  | 37  | 1518340 | 529016  | 0 | 2  | 1  | 0 | 50 | 57  | 20786840 | 9.35E-01 | 1 |
| HOXD9    | 242935  | 874  | 15  | 854400  | 283020  | 0 | 1  | 0  | 0 | 50 | 65  | 19479964 | 9.35E-01 | 1 |
| FZD2     | 1261037 | 254  | 16  | 1375940 | 437524  | 0 | 2  | 3  | 0 | 12 | 21  | 7147768  | 9.35E-01 | 1 |
| ACO2     | 1474160 | 162  | 69  | 1999652 | 577432  | 0 | 4  | 4  | 0 | 19 | 17  | 5722700  | 9.35E-01 | 1 |
| P2RY2    | 554585  | 189  | 59  | 902104  | 313280  | 0 | 1  | 2  | 0 | 50 | 78  | 20291288 | 9.35E-01 | 1 |
| GDPD5    | 567353  | 205  | 40  | 1542904 | 462800  | 0 | 2  | 2  | 0 | 50 | 55  | 19678612 | 9.35E-01 | 1 |
| BRWD3    | 150153  | NaN  | -20 | 4719492 | 1228200 | 0 | 7  | 2  | 0 | 5  | 9   | 4658616  | 9.35E-01 | 1 |
| DNAJC25  | NaN     | NaN  | NaN | 925956  | 247776  | 0 | 1  | 0  | 0 | 50 | 116 | 39893360 | 9.35E-01 | 1 |

|          |         |      |     |         |         |   |    |   |   |    |     |          |          |   |
|----------|---------|------|-----|---------|---------|---|----|---|---|----|-----|----------|----------|---|
| ZNF789   | 1327454 | 288  | 60  | 1156288 | 268424  | 0 | 2  | 0 | 0 | 50 | 58  | 17222924 | 9.35E-01 | 1 |
| ZC3H7B   | 1354493 | 173  | 58  | 2530804 | 696692  | 0 | 6  | 1 | 0 | 2  | 3   | 1612680  | 9.35E-01 | 1 |
| CCDC91   | 96900   | 922  | -5  | 1180140 | 285156  | 0 | 1  | 0 | 0 | 50 | 49  | 18542260 | 9.35E-01 | 1 |
| MAGI2    | 17425   | 1055 | -24 | 3687804 | 1066932 | 0 | 14 | 6 | 0 | 50 | 120 | 29031088 | 9.35E-01 | 1 |
| TNKS     | 106755  | 854  | 20  | 3378796 | 989324  | 0 | 4  | 0 | 0 | 13 | 12  | 8005728  | 9.35E-01 | 1 |
| FBXO41   | 536944  | 452  | 20  | 2135644 | 718052  | 0 | 5  | 3 | 0 | 50 | 54  | 17210108 | 9.35E-01 | 1 |
| TBC1D17  | 1673246 | 205  | 37  | 1655400 | 492348  | 0 | 3  | 1 | 0 | 13 | 23  | 7061972  | 9.36E-01 | 1 |
| NDRG3    | 902649  | 176  | 61  | 1005344 | 263440  | 0 | 1  | 1 | 0 | 50 | 46  | 16998644 | 9.36E-01 | 1 |
| KIAA0895 | 342379  | 285  | 17  | 1363480 | 362408  | 0 | 1  | 0 | 0 | 10 | 11  | 6055916  | 9.36E-01 | 1 |
| SLITRK5  | 20779   | 1253 | -27 | 2360992 | 715916  | 0 | 12 | 6 | 0 | 5  | 11  | 1927028  | 9.36E-01 | 1 |
| RBBP4    | 1452351 | 195  | 34  | 1133504 | 280528  | 0 | 3  | 3 | 0 | 2  | 3   | 881456   | 9.36E-01 | 1 |
| GANC     | 604999  | 342  | 37  | 2412612 | 617304  | 0 | 5  | 3 | 0 | 34 | 46  | 13753704 | 9.36E-01 | 1 |
| ADRBK2   | 149272  | 580  | -13 | 1854404 | 438592  | 0 | 2  | 1 | 0 | 50 | 49  | 22609204 | 9.36E-01 | 1 |
| N4BP3    | 821697  | 248  | 39  | 1327168 | 436100  | 0 | 3  | 0 | 0 | 1  | 0   | 534712   | 9.36E-01 | 1 |
| KBTBD11  | NaN     | NaN  | NaN | 1463160 | 536136  | 0 | 2  | 0 | 0 | 9  | 16  | 4893576  | 9.36E-01 | 1 |
| POPDC2   | 288657  | 595  | 42  | 898900  | 283376  | 0 | 1  | 0 | 0 | 50 | 57  | 18639092 | 9.36E-01 | 1 |
| FKRP     | 1166804 | 224  | 36  | 1168036 | 425420  | 0 | 1  | 1 | 0 | 50 | 50  | 18884020 | 9.36E-01 | 1 |
| TBC1D22E | 516467  | 376  | 38  | 1323964 | 348524  | 0 | 2  | 1 | 0 | 50 | 66  | 20539064 | 9.36E-01 | 1 |
| OR6C70   | 802038  | 706  | 3   | 774300  | 226416  | 0 | 1  | 1 | 0 | 50 | 71  | 20539776 | 9.36E-01 | 1 |
| ARRDC4   | 32065   | 851  | -57 | 1058388 | 313992  | 0 | 1  | 0 | 0 | 17 | 18  | 6539364  | 9.36E-01 | 1 |
| CCDC57   | 3405115 | 181  | 31  | 2323256 | 679960  | 0 | 6  | 0 | 0 | 0  | 0   | 679960   | 9.36E-01 | 1 |
| TRIM55   | 277437  | 480  | 30  | 1494488 | 401212  | 0 | 3  | 3 | 0 | 19 | 24  | 8134600  | 9.36E-01 | 1 |
| POLD2    | 1151124 | 282  | 56  | 1191888 | 358848  | 0 | 2  | 0 | 0 | 16 | 20  | 5937724  | 9.36E-01 | 1 |
| POU4F3   | 388550  | 463  | 20  | 841584  | 253116  | 0 | 1  | 0 | 0 | 14 | 24  | 6888956  | 9.36E-01 | 1 |
| ITGA2    | 193331  | 354  | 4   | 3087944 | 823072  | 0 | 5  | 3 | 0 | 50 | 51  | 21159572 | 9.36E-01 | 1 |
| GALK2    | 315919  | 528  | 8   | 1206484 | 328232  | 0 | 1  | 1 | 0 | 50 | 56  | 21924260 | 9.36E-01 | 1 |
| TMOD3    | 511166  | 132  | 27  | 934500  | 234960  | 0 | 1  | 1 | 0 | 50 | 63  | 20727744 | 9.36E-01 | 1 |
| CECR6    | 244431  | 574  | -79 | 1338560 | 516556  | 0 | 1  | 0 | 0 | 11 | 14  | 3797452  | 9.37E-01 | 1 |
| FBXO15   | 149669  | 952  | -6  | 1315776 | 362052  | 0 | 1  | 0 | 0 | 47 | 46  | 17533356 | 9.37E-01 | 1 |
| ALDH2    | 691258  | 242  | 44  | 1325388 | 385548  | 0 | 1  | 0 | 0 | 23 | 20  | 10569640 | 9.37E-01 | 1 |
| PPP1R15B | 517418  | 230  | 28  | 1775372 | 516556  | 0 | 3  | 3 | 0 | 25 | 44  | 10490252 | 9.37E-01 | 1 |
| CCNT2    | 288841  | 434  | 22  | 1895700 | 482736  | 0 | 4  | 1 | 0 | 37 | 46  | 15637656 | 9.37E-01 | 1 |
| OR10H3   | 878287  | 605  | 13  | 781776  | 231756  | 0 | 1  | 0 | 0 | 50 | 75  | 21080184 | 9.37E-01 | 1 |

|          |         |     |     |          |         |   |    |   |   |    |     |          |          |   |
|----------|---------|-----|-----|----------|---------|---|----|---|---|----|-----|----------|----------|---|
| CALR     | 1886809 | 335 | 40  | 1118908  | 256676  | 0 | 1  | 3 | 0 | 22 | 36  | 7729472  | 9.37E-01 | 1 |
| MAP3K6   | 884974  | 188 | 30  | 3228208  | 1021364 | 0 | 7  | 5 | 0 | 50 | 101 | 28643048 | 9.37E-01 | 1 |
| HAUS6    | 500417  | 324 | -17 | 2505884  | 625492  | 0 | 8  | 0 | 0 | 0  | 0   | 625492   | 9.37E-01 | 1 |
| NAV1     | 778347  | 223 | 27  | 4759008  | 1440732 | 0 | 10 | 3 | 0 | 8  | 14  | 5668944  | 9.37E-01 | 1 |
| DDX19B   | 1317982 | 139 | 47  | 1258816  | 326096  | 0 | 3  | 2 | 0 | 21 | 41  | 9045604  | 9.37E-01 | 1 |
| LDHAL6A  | 611782  | 176 | 31  | 866504   | 230332  | 0 | 1  | 0 | 0 | 36 | 48  | 13303008 | 9.37E-01 | 1 |
| FAM20A   | 662487  | 313 | -28 | 1374516  | 404772  | 0 | 5  | 1 | 0 | 2  | 4   | 1016736  | 9.37E-01 | 1 |
| LRRC4    | NaN     | NaN | NaN | 1598440  | 501248  | 0 | 2  | 3 | 0 | 50 | 119 | 40146832 | 9.37E-01 | 1 |
| THOC3    | 537044  | 631 | 37  | 907800   | 241368  | 0 | 1  | 0 | 0 | 50 | 69  | 22538004 | 9.37E-01 | 1 |
| ZNF765   | 374515  | 876 | -62 | 1370244  | 321468  | 0 | 2  | 1 | 0 | 50 | 58  | 17533000 | 9.37E-01 | 1 |
| HUWE1    | 888642  | NaN | 47  | 11155616 | 3207916 | 0 | 23 | 9 | 0 | 35 | 59  | 17549732 | 9.37E-01 | 1 |
| OAT      | 280862  | 543 | 16  | 1128520  | 319688  | 0 | 1  | 0 | 0 | 37 | 48  | 19006128 | 9.37E-01 | 1 |
| SPATA17  | 87153   | 966 | -21 | 970100   | 234604  | 0 | 1  | 1 | 0 | 50 | 90  | 26055640 | 9.37E-01 | 1 |
| ACAD9    | 1117839 | 382 | 54  | 1609120  | 456392  | 0 | 4  | 2 | 0 | 50 | 75  | 20430128 | 9.37E-01 | 1 |
| WDR82    | 1114111 | 181 | 50  | 830548   | 209684  | 0 | 1  | 0 | 0 | 50 | 72  | 20057396 | 9.37E-01 | 1 |
| PTPDC1   | 449197  | 349 | 25  | 2117132  | 598792  | 0 | 7  | 1 | 0 | 11 | 12  | 3610552  | 9.37E-01 | 1 |
| FBXO18   | 649866  | 305 | 28  | 2842304  | 762196  | 0 | 6  | 4 | 0 | 3  | 5   | 1793528  | 9.37E-01 | 1 |
| FMNL3    | 1919377 | 265 | 60  | 2657540  | 742972  | 0 | 4  | 2 | 0 | 27 | 33  | 11775056 | 9.37E-01 | 1 |
| ATG9B    | 622098  | 373 | 41  | 2256328  | 763976  | 0 | 3  | 0 | 0 | 2  | 2   | 1758996  | 9.37E-01 | 1 |
| EPT1     | 698050  | 346 | 36  | 1112856  | 309720  | 0 | 2  | 0 | 0 | 1  | 0   | 578856   | 9.37E-01 | 1 |
| SLC39A14 | 683723  | 144 | 32  | 1487724  | 435744  | 0 | 1  | 0 | 0 | 50 | 51  | 21613828 | 9.37E-01 | 1 |
| RAVER2   | 269434  | 456 | -10 | 1739416  | 485228  | 0 | 1  | 1 | 0 | 50 | 42  | 19719908 | 9.37E-01 | 1 |
| PHC3     | 396500  | 426 | 32  | 2508376  | 744752  | 0 | 3  | 0 | 0 | 3  | 2   | 1939844  | 9.37E-01 | 1 |
| LMAN2    | 942017  | 227 | 53  | 916700   | 257032  | 0 | 3  | 3 | 0 | 13 | 20  | 4127820  | 9.37E-01 | 1 |
| TYK2     | 1802015 | 191 | 21  | 3013896  | 890712  | 0 | 9  | 6 | 0 | 2  | 6   | 1467432  | 9.37E-01 | 1 |
| PEPD     | 302640  | 598 | -23 | 1280532  | 362052  | 0 | 1  | 0 | 0 | 3  | 2   | 1774304  | 9.37E-01 | 1 |
| ACSS2    | 1004645 | 205 | 44  | 1861880  | 505876  | 0 | 2  | 3 | 0 | 12 | 15  | 6442176  | 9.37E-01 | 1 |
| DAG1     | 1657622 | 236 | 28  | 2154868  | 720188  | 0 | 4  | 1 | 0 | 2  | 1   | 1166968  | 9.37E-01 | 1 |
| PES1     | 653792  | 330 | 28  | 1537208  | 411892  | 0 | 1  | 0 | 0 | 37 | 30  | 15384540 | 9.37E-01 | 1 |
| NKD2     | 692388  | 484 | 29  | 1154508  | 334284  | 0 | 1  | 1 | 0 | 50 | 54  | 21721340 | 9.37E-01 | 1 |
| DFNB59   | 170323  | 555 | 37  | 908512   | 248132  | 0 | 1  | 2 | 0 | 11 | 13  | 2651488  | 9.37E-01 | 1 |
| SMC1B    | 461206  | 199 | 17  | 3275200  | 789608  | 0 | 6  | 2 | 0 | 43 | 48  | 18109008 | 9.37E-01 | 1 |
| SLC45A3  | 747509  | 281 | 33  | 1310436  | 477396  | 0 | 4  | 3 | 0 | 14 | 23  | 5793544  | 9.37E-01 | 1 |

|          |         |     |     |         |         |   |    |   |   |    |     |          |          |   |
|----------|---------|-----|-----|---------|---------|---|----|---|---|----|-----|----------|----------|---|
| C9orf142 | 1979517 | 188 | 34  | 518336  | 166252  | 0 | 1  | 1 | 0 | 16 | 30  | 5786424  | 9.37E-01 | 1 |
| MEGF11   | 708482  | 458 | 49  | 2728740 | 713424  | 0 | 4  | 0 | 0 | 0  | 0   | 713424   | 9.37E-01 | 1 |
| TTLL7    | 157542  | 957 | -14 | 2337496 | 588824  | 0 | 8  | 2 | 0 | 3  | 8   | 2086516  | 9.38E-01 | 1 |
| C19orf18 | 1252385 | 750 | -19 | 574584  | 140976  | 0 | 1  | 1 | 0 | 50 | 145 | 23910384 | 9.38E-01 | 1 |
| SERPINA6 | 203903  | 744 | -1  | 1027416 | 290496  | 0 | 4  | 2 | 0 | 3  | 5   | 1280532  | 9.38E-01 | 1 |
| SART3    | 437636  | 399 | 40  | 2514072 | 651480  | 0 | 6  | 0 | 0 | 0  | 0   | 651480   | 9.38E-01 | 1 |
| RNF157   | 1737490 | 208 | 23  | 1765404 | 492348  | 0 | 4  | 3 | 0 | 7  | 17  | 4960504  | 9.38E-01 | 1 |
| SLC46A3  | 167695  | 629 | 37  | 1178004 | 336420  | 0 | 2  | 0 | 0 | 26 | 35  | 9892172  | 9.38E-01 | 1 |
| PAN3     | 265548  | 616 | 57  | 2268076 | 653972  | 0 | 5  | 1 | 0 | 21 | 21  | 6697784  | 9.38E-01 | 1 |
| ADAM32   | 347510  | 612 | -5  | 2111792 | 515488  | 0 | 5  | 1 | 0 | 25 | 29  | 9007512  | 9.38E-01 | 1 |
| BEGAIN   | 402460  | 304 | 5   | 1472416 | 456392  | 0 | 1  | 2 | 0 | 50 | 61  | 23805008 | 9.38E-01 | 1 |
| KIF3A    | 717412  | 356 | 59  | 1849776 | 461376  | 0 | 2  | 0 | 0 | 40 | 33  | 14637296 | 9.38E-01 | 1 |
| ODF2     | 1916608 | 160 | 35  | 2270924 | 597724  | 0 | 6  | 3 | 0 | 50 | 88  | 22837400 | 9.38E-01 | 1 |
| FLNC     | 830283  | 310 | 35  | 6865460 | 2069428 | 0 | 18 | 9 | 0 | 47 | 71  | 22027144 | 9.38E-01 | 1 |
| IKBKKG   | 2163759 | NaN | 42  | 1270564 | 333572  | 0 | 2  | 0 | 0 | 50 | 72  | 22102972 | 9.38E-01 | 1 |
| CLEC4M   | 719851  | 329 | 21  | 1063372 | 266288  | 0 | 3  | 2 | 0 | 3  | 15  | 3114644  | 9.38E-01 | 1 |
| NRXN3    | 21523   | 905 | -32 | 3016388 | 826276  | 0 | 8  | 4 | 0 | 50 | 84  | 17166676 | 9.38E-01 | 1 |
| OR4C3    | 278638  | 642 | -40 | 806340  | 248844  | 0 | 2  | 2 | 0 | 7  | 18  | 3234972  | 9.38E-01 | 1 |
| MAPK6    | 583597  | 153 | 23  | 1861168 | 469208  | 0 | 3  | 1 | 0 | 50 | 52  | 19123964 | 9.38E-01 | 1 |
| ATP8B4   | 278209  | 408 | -21 | 3137784 | 799932  | 0 | 13 | 8 | 0 | 3  | 10  | 1681032  | 9.38E-01 | 1 |
| DNAJA2   | 498873  | 362 | 13  | 1082596 | 274832  | 0 | 2  | 0 | 0 | 26 | 50  | 13805680 | 9.38E-01 | 1 |
| MAVS     | 740484  | 241 | 42  | 1318268 | 440728  | 0 | 3  | 2 | 0 | 4  | 3   | 1253832  | 9.38E-01 | 1 |
| PMFBP1   | 443927  | 479 | 0   | 2733012 | 646140  | 0 | 9  | 1 | 0 | 3  | 4   | 1242440  | 9.38E-01 | 1 |
| PORCN    | 726793  | NaN | 2   | 1189752 | 350304  | 0 | 1  | 0 | 0 | 24 | 24  | 10365296 | 9.38E-01 | 1 |
| KIF20B   | 202048  | 401 | 23  | 4723408 | 1118552 | 0 | 9  | 4 | 0 | 12 | 14  | 5216112  | 9.38E-01 | 1 |
| NADK     | 1511678 | 243 | 30  | 1155932 | 323248  | 0 | 2  | 1 | 0 | 50 | 69  | 18623784 | 9.38E-01 | 1 |
| PPARA    | 536661  | 179 | 24  | 1203636 | 324672  | 0 | 1  | 2 | 0 | 50 | 76  | 22770472 | 9.38E-01 | 1 |
| GMEB2    | 1094905 | 193 | 54  | 1322896 | 416876  | 0 | 1  | 0 | 0 | 8  | 6   | 3583852  | 9.38E-01 | 1 |
| AJAP1    | 5695    | 921 | 4   | 1007836 | 333572  | 0 | 2  | 2 | 0 | 3  | 3   | 1196160  | 9.38E-01 | 1 |
| ZNF669   | 379967  | 612 | -15 | 1182276 | 320400  | 0 | 1  | 1 | 0 | 50 | 38  | 15803196 | 9.38E-01 | 1 |
| EDC4     | 879834  | 158 | 50  | 3544336 | 1067288 | 0 | 8  | 5 | 0 | 50 | 85  | 23764780 | 9.38E-01 | 1 |
| SERPINE3 | 202753  | 434 | 28  | 1081884 | 307584  | 0 | 1  | 0 | 0 | 34 | 43  | 14320456 | 9.38E-01 | 1 |
| UBL7     | 640438  | 204 | 54  | 972236  | 291208  | 0 | 1  | 1 | 0 | 50 | 66  | 22913228 | 9.38E-01 | 1 |



|          |         |      |     |         |         |   |    |   |   |    |     |          |          |   |
|----------|---------|------|-----|---------|---------|---|----|---|---|----|-----|----------|----------|---|
| ARL6IP4  | 1093113 | 196  | 47  | 925600  | 303668  | 0 | 1  | 0 | 0 | 50 | 70  | 23094788 | 9.38E-01 | 1 |
| ACTR10   | 291132  | 545  | 21  | 1090072 | 301532  | 0 | 2  | 2 | 0 | 8  | 9   | 2706668  | 9.38E-01 | 1 |
| GPR32    | 652250  | 593  | 27  | 861876  | 280884  | 0 | 2  | 3 | 0 | 11 | 12  | 2724112  | 9.39E-01 | 1 |
| HNF1A    | 1225663 | 380  | 40  | 1569604 | 495908  | 0 | 9  | 4 | 0 | 5  | 12  | 2076904  | 9.39E-01 | 1 |
| ZC3H12C  | 137968  | 266  | 8   | 2243156 | 612676  | 0 | 4  | 3 | 0 | 50 | 59  | 20309800 | 9.39E-01 | 1 |
| ST5      | 519265  | 369  | 26  | 2877548 | 849772  | 0 | 4  | 2 | 0 | 15 | 8   | 4429708  | 9.39E-01 | 1 |
| PKD2     | 1197823 | 210  | 20  | 1062304 | 287648  | 0 | 1  | 1 | 0 | 50 | 73  | 23672220 | 9.39E-01 | 1 |
| OR5K4    | 414958  | 885  | -14 | 799932  | 229620  | 0 | 1  | 1 | 0 | 50 | 65  | 18540480 | 9.39E-01 | 1 |
| CYP4F8   | 852124  | 605  | 29  | 1339984 | 378428  | 0 | 4  | 4 | 0 | 4  | 6   | 1391604  | 9.39E-01 | 1 |
| CBLC     | 866184  | 178  | -12 | 1202568 | 364188  | 0 | 2  | 2 | 0 | 50 | 72  | 19151732 | 9.39E-01 | 1 |
| ZDHHC16  | 556333  | 188  | 42  | 973660  | 280172  | 0 | 1  | 1 | 0 | 50 | 54  | 18863728 | 9.39E-01 | 1 |
| SERPINA3 | 316239  | 858  | 10  | 1070492 | 305092  | 0 | 2  | 1 | 0 | 50 | 75  | 18471772 | 9.39E-01 | 1 |
| ERBB2IP  | 400865  | 189  | 32  | 3573172 | 920972  | 0 | 8  | 1 | 0 | 3  | 5   | 1873628  | 9.39E-01 | 1 |
| HS1BP3   | 580167  | 278  | 28  | 994664  | 292276  | 0 | 1  | 0 | 0 | 34 | 42  | 13866200 | 9.39E-01 | 1 |
| SCN9A    | 93566   | 908  | -9  | 5122128 | 1326456 | 0 | 17 | 3 | 0 | 7  | 17  | 5214688  | 9.39E-01 | 1 |
| FKBP10   | 1760409 | 175  | 35  | 1467432 | 438948  | 0 | 2  | 2 | 0 | 18 | 37  | 7890028  | 9.39E-01 | 1 |
| ASRGL1   | 3053973 | 413  | 49  | 787116  | 232824  | 0 | 2  | 3 | 0 | 16 | 13  | 2613396  | 9.39E-01 | 1 |
| MFAP3L   | 136790  | 831  | -4  | 1019940 | 297972  | 0 | 1  | 2 | 0 | 50 | 55  | 17384192 | 9.39E-01 | 1 |
| DBH      | 765804  | 481  | 31  | 1572096 | 457104  | 0 | 3  | 3 | 0 | 12 | 19  | 6466740  | 9.39E-01 | 1 |
| ZMYM2    | 329235  | 391  | 43  | 3608772 | 904596  | 0 | 6  | 1 | 0 | 5  | 6   | 2966192  | 9.39E-01 | 1 |
| GPRIN3   | 108672  | 672  | -1  | 1901752 | 587756  | 0 | 3  | 2 | 0 | 50 | 61  | 19723112 | 9.39E-01 | 1 |
| RNF14    | 696239  | 321  | 48  | 1241016 | 310788  | 0 | 1  | 1 | 0 | 50 | 50  | 19214032 | 9.39E-01 | 1 |
| PACRG    | 81261   | 1273 | -28 | 767536  | 209684  | 0 | 1  | 0 | 0 | 50 | 110 | 24171332 | 9.39E-01 | 1 |
| APOA1BP  | 2049505 | 180  | 37  | 727664  | 221788  | 0 | 2  | 3 | 0 | 3  | 5   | 1179072  | 9.39E-01 | 1 |
| OR7D2    | 311030  | 471  | -63 | 765756  | 237096  | 0 | 1  | 2 | 0 | 50 | 102 | 27434784 | 9.39E-01 | 1 |
| STX10    | 1948449 | 221  | 41  | 653260  | 176576  | 0 | 1  | 2 | 0 | 6  | 8   | 2024216  | 9.39E-01 | 1 |
| SERPINE2 | 314351  | 346  | 11  | 1059456 | 291564  | 0 | 1  | 1 | 0 | 50 | 57  | 21233620 | 9.39E-01 | 1 |
| PRSS35   | 185011  | 557  | -30 | 1042012 | 288716  | 0 | 2  | 2 | 0 | 50 | 102 | 24837764 | 9.40E-01 | 1 |
| NAIF1    | 1898149 | 195  | 32  | 794948  | 260236  | 0 | 1  | 1 | 0 | 50 | 88  | 21996172 | 9.40E-01 | 1 |
| CWF19L1  | 1070791 | 198  | 40  | 1419372 | 365256  | 0 | 2  | 0 | 0 | 16 | 15  | 4935228  | 9.40E-01 | 1 |
| DPYSL3   | 97519   | 827  | -10 | 1479180 | 405840  | 0 | 2  | 1 | 0 | 50 | 81  | 26726700 | 9.40E-01 | 1 |
| SYT6     | 760371  | 596  | 13  | 1091852 | 302956  | 0 | 1  | 2 | 0 | 2  | 2   | 854756   | 9.40E-01 | 1 |
| F2       | 965022  | 176  | 48  | 1613036 | 442864  | 0 | 2  | 3 | 0 | 9  | 13  | 3752596  | 9.40E-01 | 1 |

|          |         |     |     |         |         |   |    |   |   |    |    |          |          |   |
|----------|---------|-----|-----|---------|---------|---|----|---|---|----|----|----------|----------|---|
| CDSN     | NaN     | NaN | NaN | 1281956 | 422572  | 0 | 2  | 3 | 0 | 26 | 43 | 11999692 | 9.40E-01 | 1 |
| SYNGR2   | 527017  | 217 | 27  | 569600  | 166252  | 0 | 3  | 3 | 0 | 5  | 26 | 2872564  | 9.40E-01 | 1 |
| TRIM8    | 878626  | 180 | 27  | 1389468 | 400500  | 0 | 4  | 0 | 0 | 2  | 1  | 755432   | 9.40E-01 | 1 |
| SERPINA4 | 316239  | 858 | 10  | 1078680 | 309720  | 0 | 2  | 1 | 0 | 50 | 75 | 18471772 | 9.40E-01 | 1 |
| SLC30A4  | 207518  | 299 | 10  | 1096480 | 306872  | 0 | 1  | 2 | 0 | 18 | 16 | 5485604  | 9.40E-01 | 1 |
| SCO1     | 59713   | 749 | -45 | 770028  | 221076  | 0 | 1  | 1 | 0 | 23 | 51 | 13509844 | 9.40E-01 | 1 |
| CCR9     | 222879  | 519 | 54  | 940908  | 253116  | 0 | 1  | 1 | 0 | 21 | 22 | 8029580  | 9.40E-01 | 1 |
| KLHL13   | 57664   | NaN | -2  | 1895700 | 499824  | 0 | 5  | 3 | 0 | 14 | 31 | 4959436  | 9.40E-01 | 1 |
| ERCC4    | 125854  | 251 | 11  | 2333936 | 648988  | 0 | 4  | 1 | 0 | 41 | 53 | 18388468 | 9.40E-01 | 1 |
| ATG9A    | 773232  | 177 | 36  | 2118556 | 632612  | 0 | 4  | 3 | 0 | 50 | 56 | 19964124 | 9.40E-01 | 1 |
| ARPC1B   | 903923  | 263 | 51  | 972236  | 261304  | 0 | 1  | 2 | 0 | 10 | 14 | 5285176  | 9.40E-01 | 1 |
| 34GALNT4 | 1454043 | 344 | 48  | 2599868 | 815596  | 0 | 4  | 2 | 0 | 8  | 21 | 8495940  | 9.40E-01 | 1 |
| MYO5A    | 517214  | 386 | 19  | 4871860 | 1245644 | 0 | 11 | 3 | 0 | 21 | 29 | 10209724 | 9.40E-01 | 1 |
| PPP1R7   | 1363901 | 233 | 35  | 953724  | 243504  | 0 | 1  | 1 | 0 | 50 | 73 | 23887244 | 9.40E-01 | 1 |
| OR1S1    | 637499  | 828 | -25 | 804916  | 238520  | 0 | 2  | 4 | 0 | 12 | 16 | 3304748  | 9.40E-01 | 1 |
| TTLL2    | 254009  | 704 | 1   | 1495556 | 415096  | 0 | 1  | 3 | 0 | 14 | 31 | 8777180  | 9.40E-01 | 1 |
| PPFIBP2  | 104307  | 853 | 12  | 2286944 | 621220  | 0 | 3  | 3 | 0 | 50 | 70 | 20469644 | 9.40E-01 | 1 |
| ITGB4    | 1885370 | 198 | 27  | 4784996 | 1398724 | 0 | 13 | 8 | 0 | 27 | 40 | 12343944 | 9.40E-01 | 1 |
| ANXA4    | 864962  | 193 | 50  | 857604  | 225348  | 0 | 1  | 1 | 0 | 50 | 77 | 22354308 | 9.40E-01 | 1 |
| OR2W3    | 87551   | 993 | -35 | 756856  | 250268  | 0 | 2  | 2 | 0 | 4  | 10 | 1329304  | 9.40E-01 | 1 |
| DDX27    | 886628  | 261 | 50  | 2084736 | 556428  | 0 | 2  | 1 | 0 | 50 | 75 | 24073432 | 9.40E-01 | 1 |
| MOXD1    | 188578  | 673 | 1   | 1592032 | 424352  | 0 | 2  | 1 | 0 | 50 | 61 | 22625580 | 9.40E-01 | 1 |
| IRX3     | 99177   | 509 | -42 | 1204348 | 416876  | 0 | 1  | 2 | 0 | 6  | 6  | 3221800  | 9.40E-01 | 1 |
| FARSA    | 1886809 | 335 | 40  | 1312928 | 371308  | 0 | 2  | 1 | 0 | 50 | 62 | 18190176 | 9.40E-01 | 1 |
| SASH3    | 370406  | NaN | 69  | 969388  | 281240  | 0 | 1  | 0 | 0 | 50 | 66 | 22247152 | 9.41E-01 | 1 |
| COPS7B   | 955894  | 365 | 41  | 684588  | 190104  | 0 | 1  | 0 | 0 | 50 | 89 | 21316212 | 9.41E-01 | 1 |
| SRP54    | 629868  | 171 | 32  | 1369532 | 312568  | 0 | 2  | 2 | 0 | 50 | 66 | 20974452 | 9.41E-01 | 1 |
| CCDC114  | 1265470 | 217 | 34  | 1720548 | 484872  | 0 | 4  | 3 | 0 | 50 | 73 | 18591388 | 9.41E-01 | 1 |
| PDE6A    | 1032925 | 135 | 43  | 2291572 | 556784  | 0 | 2  | 0 | 0 | 3  | 1  | 1675692  | 9.41E-01 | 1 |
| SUV39H2  | 255711  | 396 | 38  | 909580  | 232112  | 0 | 1  | 1 | 0 | 50 | 62 | 20607060 | 9.41E-01 | 1 |
| VASP     | 1107927 | 194 | 44  | 978644  | 293344  | 0 | 1  | 1 | 0 | 50 | 55 | 18375296 | 9.41E-01 | 1 |
| SUN5     | 461222  | 461 | 40  | 1019584 | 253472  | 0 | 1  | 1 | 0 | 50 | 77 | 24604940 | 9.41E-01 | 1 |
| TTC21B   | 100856  | 599 | -2  | 3469576 | 869708  | 0 | 9  | 1 | 0 | 5  | 7  | 3191184  | 9.41E-01 | 1 |

|         |         |      |     |         |         |   |    |    |   |    |     |          |          |   |
|---------|---------|------|-----|---------|---------|---|----|----|---|----|-----|----------|----------|---|
| DZIP1L  | 175494  | 464  | 8   | 1980428 | 551800  | 0 | 4  | 2  | 0 | 30 | 38  | 11679648 | 9.41E-01 | 1 |
| ACOT9   | 473183  | NaN  | 48  | 1209688 | 292988  | 0 | 1  | 0  | 0 | 50 | 48  | 19909300 | 9.41E-01 | 1 |
| SLC11A1 | 734742  | 197  | 37  | 1392672 | 432540  | 0 | 1  | 2  | 0 | 42 | 49  | 17001136 | 9.41E-01 | 1 |
| PTPRF   | 996816  | 182  | 33  | 4814544 | 1435392 | 0 | 12 | 5  | 0 | 5  | 7   | 3076196  | 9.41E-01 | 1 |
| RYK     | 538368  | 306  | 16  | 1583844 | 433608  | 0 | 1  | 3  | 0 | 19 | 26  | 8325060  | 9.41E-01 | 1 |
| MAP2    | 109927  | 678  | -9  | 4830208 | 1368464 | 0 | 11 | 4  | 0 | 50 | 60  | 24955956 | 9.41E-01 | 1 |
| POLG    | 636068  | 420  | 24  | 3161992 | 900680  | 0 | 6  | 2  | 0 | 7  | 13  | 4963708  | 9.41E-01 | 1 |
| WDR72   | 15464   | 1008 | -29 | 2863308 | 751872  | 0 | 9  | 5  | 0 | 26 | 48  | 8409076  | 9.41E-01 | 1 |
| TMEM39A | 270591  | 599  | 29  | 1245288 | 355644  | 0 | 1  | 1  | 0 | 30 | 37  | 11842340 | 9.41E-01 | 1 |
| IMPA1   | 160074  | 681  | -1  | 916344  | 201852  | 0 | 2  | 2  | 0 | 2  | 3   | 1055540  | 9.41E-01 | 1 |
| HSCB    | 571394  | 219  | -10 | 625492  | 154148  | 0 | 2  | 2  | 0 | 2  | 2   | 589536   | 9.41E-01 | 1 |
| TTLL6   | 727820  | 415  | 24  | 2385912 | 622644  | 0 | 4  | 1  | 0 | 25 | 45  | 16791452 | 9.41E-01 | 1 |
| SI      | 13371   | 1355 | -23 | 4837328 | 1218232 | 0 | 19 | 4  | 0 | 5  | 10  | 3117492  | 9.41E-01 | 1 |
| MSTO1   | 2230401 | 185  | 32  | 1446428 | 440728  | 0 | 2  | 1  | 0 | 50 | 72  | 23683256 | 9.41E-01 | 1 |
| PIH1D2  | 389805  | 179  | 31  | 873268  | 224636  | 0 | 1  | 1  | 0 | 37 | 39  | 12636576 | 9.41E-01 | 1 |
| SMG5    | 2266205 | 211  | 33  | 2618736 | 729444  | 0 | 9  | 5  | 0 | 6  | 7   | 1890360  | 9.41E-01 | 1 |
| ATRIP   | 1441050 | 223  | 39  | 1991464 | 601640  | 0 | 3  | 0  | 0 | 4  | 6   | 3126748  | 9.41E-01 | 1 |
| CCNE1   | 167528  | 609  | -33 | 1093988 | 271984  | 0 | 2  | 0  | 0 | 50 | 100 | 24916796 | 9.41E-01 | 1 |
| RUNDC3A | 1009890 | 175  | 40  | 1169816 | 328588  | 0 | 1  | 0  | 0 | 17 | 28  | 10725568 | 9.41E-01 | 1 |
| COL10A1 | NaN     | NaN  | NaN | 1604848 | 585620  | 0 | 2  | 1  | 0 | 50 | 117 | 40231204 | 9.42E-01 | 1 |
| AMICA1  | 707709  | 293  | 56  | 1037740 | 282308  | 0 | 1  | 0  | 0 | 35 | 34  | 11396628 | 9.42E-01 | 1 |
| DOT1L   | 1658089 | 199  | 28  | 3857260 | 1187972 | 0 | 21 | 12 | 0 | 7  | 21  | 3803860  | 9.42E-01 | 1 |
| SMU1    | 953054  | 286  | 0   | 1343544 | 350304  | 0 | 4  | 0  | 0 | 7  | 14  | 3185844  | 9.42E-01 | 1 |
| CXorf23 | 339910  | NaN  | 56  | 1797444 | 433608  | 0 | 3  | 1  | 0 | 16 | 15  | 5251000  | 9.42E-01 | 1 |
| GNAT1   | 846254  | 199  | 44  | 922396  | 235316  | 0 | 1  | 1  | 0 | 39 | 49  | 14244272 | 9.42E-01 | 1 |
| ACTL9   | 536422  | 487  | -47 | 994308  | 343896  | 0 | 4  | 3  | 0 | 5  | 15  | 1866508  | 9.42E-01 | 1 |
| ADSL    | 445026  | 427  | 47  | 1267004 | 342472  | 0 | 1  | 0  | 0 | 15 | 20  | 9024244  | 9.42E-01 | 1 |
| CILP2   | 868278  | 284  | 7   | 2791752 | 947316  | 0 | 7  | 2  | 0 | 31 | 41  | 11001112 | 9.42E-01 | 1 |
| USP54   | 1072614 | 150  | 40  | 4308668 | 1181920 | 0 | 9  | 3  | 0 | 6  | 19  | 5606644  | 9.42E-01 | 1 |
| KCNJ11  | 454503  | 598  | 14  | 952656  | 300108  | 0 | 2  | 3  | 0 | 4  | 11  | 2547892  | 9.42E-01 | 1 |
| THRB    | 370625  | 518  | -12 | 1206484 | 307940  | 0 | 1  | 2  | 0 | 50 | 69  | 23081260 | 9.42E-01 | 1 |
| ZNF92   | 300914  | 894  | 18  | 1536496 | 357068  | 0 | 1  | 1  | 0 | 50 | 54  | 21619168 | 9.42E-01 | 1 |
| LMAN1   | 292594  | 549  | 35  | 1343900 | 346744  | 0 | 1  | 1  | 0 | 50 | 41  | 19123964 | 9.42E-01 | 1 |

|          |         |     |     |          |         |   |    |   |   |    |    |          |          |   |
|----------|---------|-----|-----|----------|---------|---|----|---|---|----|----|----------|----------|---|
| KIAA0355 | 662469  | 216 | -1  | 2697056  | 785692  | 0 | 5  | 3 | 0 | 50 | 60 | 20026424 | 9.42E-01 | 1 |
| LYPD5    | 464802  | 286 | 11  | 633680   | 192952  | 0 | 1  | 1 | 0 | 7  | 12 | 2949104  | 9.42E-01 | 1 |
| PPP2R2A  | 194762  | 353 | 13  | 1229980  | 287648  | 0 | 1  | 1 | 0 | 50 | 61 | 20706384 | 9.42E-01 | 1 |
| FBF1     | 1667990 | 194 | 22  | 2894280  | 858672  | 0 | 13 | 2 | 0 | 0  | 2  | 858672   | 9.42E-01 | 1 |
| TRAP1    | 611617  | 242 | 43  | 1822008  | 515844  | 0 | 1  | 0 | 0 | 14 | 15 | 5350680  | 9.42E-01 | 1 |
| PRCP     | 306726  | 371 | -6  | 1336068  | 362052  | 0 | 2  | 1 | 0 | 10 | 12 | 4032412  | 9.42E-01 | 1 |
| MED24    | 1613074 | 202 | 28  | 2555012  | 728020  | 0 | 5  | 3 | 0 | 50 | 64 | 20738780 | 9.42E-01 | 1 |
| ZMYND15  | 1272092 | 222 | 28  | 1857608  | 578500  | 0 | 1  | 2 | 0 | 50 | 74 | 23892584 | 9.42E-01 | 1 |
| TBCCD1   | 676664  | 501 | 35  | 1420440  | 397296  | 0 | 1  | 0 | 0 | 17 | 17 | 7760088  | 9.42E-01 | 1 |
| KIAA1109 | 325000  | 770 | 8   | 12909272 | 3486664 | 0 | 34 | 9 | 0 | 3  | 10 | 4298344  | 9.42E-01 | 1 |
| MARCAL   | 590685  | 384 | 31  | 2435396  | 694912  | 0 | 4  | 3 | 0 | 40 | 45 | 17232180 | 9.42E-01 | 1 |
| CERCAM   | 1928973 | 188 | 64  | 1505168  | 453544  | 0 | 5  | 1 | 0 | 6  | 10 | 2403356  | 9.42E-01 | 1 |
| SMCR8    | 957114  | 254 | 9   | 2345328  | 664296  | 0 | 8  | 1 | 0 | 1  | 2  | 1019940  | 9.43E-01 | 1 |
| NPC1L1   | 1577451 | 363 | 49  | 3383424  | 1057320 | 0 | 10 | 4 | 0 | 12 | 22 | 5892868  | 9.43E-01 | 1 |
| MAPKAPK  | 755663  | 242 | 42  | 1260240  | 313992  | 0 | 1  | 0 | 0 | 5  | 4  | 2579576  | 9.43E-01 | 1 |
| CELA3B   | 448600  | 190 | 29  | 698472   | 201852  | 0 | 2  | 4 | 0 | 5  | 7  | 931296   | 9.43E-01 | 1 |
| TFCP2    | 530649  | 155 | 40  | 1339628  | 331792  | 0 | 2  | 1 | 0 | 50 | 50 | 17804628 | 9.43E-01 | 1 |
| TRIM33   | 727314  | 264 | 13  | 2902468  | 794948  | 0 | 4  | 1 | 0 | 4  | 4  | 3009268  | 9.43E-01 | 1 |
| LRP8     | 563155  | 310 | 23  | 2488796  | 676756  | 0 | 5  | 1 | 0 | 1  | 1  | 959064   | 9.43E-01 | 1 |
| ADCK4    | 1022809 | 201 | 31  | 1388756  | 417232  | 0 | 2  | 1 | 0 | 35 | 42 | 13429032 | 9.43E-01 | 1 |
| SLC2A13  | 70254   | 909 | -18 | 1630480  | 489500  | 0 | 2  | 1 | 0 | 17 | 21 | 7364928  | 9.43E-01 | 1 |
| TNRC6B   | 502506  | 484 | 34  | 4765416  | 1336068 | 0 | 10 | 3 | 0 | 23 | 43 | 14054524 | 9.43E-01 | 1 |
| ZNF678   | 606105  | 575 | -6  | 1515848  | 358492  | 0 | 3  | 0 | 0 | 49 | 70 | 21063808 | 9.43E-01 | 1 |
| PPM1N    | 1107927 | 194 | 44  | 1038808  | 359204  | 0 | 1  | 0 | 0 | 18 | 23 | 8456780  | 9.43E-01 | 1 |
| FZD5     | 335586  | 341 | 26  | 1411896  | 465648  | 0 | 1  | 1 | 0 | 50 | 45 | 22065948 | 9.43E-01 | 1 |
| ADAM12   | 214443  | 485 | -29 | 2437176  | 685656  | 0 | 6  | 3 | 0 | 50 | 98 | 22668656 | 9.43E-01 | 1 |
| PLSCR4   | 119025  | 361 | -10 | 866860   | 224636  | 0 | 1  | 1 | 0 | 12 | 18 | 5852996  | 9.43E-01 | 1 |
| METTL14  | 238966  | 636 | 31  | 1198652  | 308296  | 0 | 4  | 0 | 0 | 4  | 5  | 1092920  | 9.43E-01 | 1 |
| DDX60    | 83741   | 350 | -10 | 4512300  | 1129944 | 0 | 8  | 2 | 0 | 1  | 4  | 1954084  | 9.43E-01 | 1 |
| PSTPIP2  | 386983  | 300 | 54  | 930584   | 204700  | 0 | 1  | 0 | 0 | 50 | 60 | 19433684 | 9.43E-01 | 1 |
| REXO1    | 2226995 | 214 | 26  | 3011048  | 970456  | 0 | 7  | 2 | 0 | 50 | 75 | 24188776 | 9.43E-01 | 1 |
| VPS41    | 139398  | 862 | 3   | 2320764  | 540408  | 0 | 5  | 1 | 0 | 50 | 58 | 19640520 | 9.43E-01 | 1 |
| FAM83F   | 712106  | 370 | 28  | 1239948  | 384480  | 0 | 3  | 3 | 0 | 3  | 6  | 2127456  | 9.43E-01 | 1 |

|          |         |      |     |         |         |   |    |   |   |    |     |          |          |   |
|----------|---------|------|-----|---------|---------|---|----|---|---|----|-----|----------|----------|---|
| SLC4A11  | 1086365 | 338  | 49  | 2446076 | 724816  | 0 | 6  | 2 | 0 | 50 | 68  | 19319764 | 9.43E-01 | 1 |
| PCNX     | 262398  | 420  | 40  | 5952676 | 1700612 | 0 | 11 | 5 | 0 | 33 | 46  | 14204044 | 9.43E-01 | 1 |
| TBR1     | 219774  | 676  | 10  | 1699900 | 509792  | 0 | 3  | 2 | 0 | 50 | 63  | 19999724 | 9.43E-01 | 1 |
| CNTROB   | 1794630 | 337  | 33  | 2351736 | 694200  | 0 | 6  | 2 | 0 | 45 | 62  | 18104736 | 9.44E-01 | 1 |
| ZFP14    | 784358  | 758  | -67 | 1399792 | 326096  | 0 | 4  | 1 | 0 | 50 | 76  | 18074120 | 9.44E-01 | 1 |
| DUSP4    | 307440  | 267  | 42  | 1103600 | 347812  | 0 | 1  | 2 | 0 | 50 | 47  | 17510572 | 9.44E-01 | 1 |
| ZCCHC9   | 148763  | 777  | 23  | 718764  | 174084  | 0 | 1  | 2 | 0 | 5  | 6   | 1922756  | 9.44E-01 | 1 |
| RHD      | 642678  | 270  | 36  | 1061948 | 317908  | 0 | 1  | 1 | 0 | 50 | 58  | 20611688 | 9.44E-01 | 1 |
| ZNF280C  | 320988  | NaN  | 38  | 1961560 | 479888  | 0 | 3  | 0 | 0 | 3  | 3   | 1343900  | 9.44E-01 | 1 |
| DAMDEC   | 57540   | 741  | 5   | 1243864 | 320756  | 0 | 1  | 1 | 0 | 50 | 63  | 24260688 | 9.44E-01 | 1 |
| HIVEP2   | 248800  | 596  | 25  | 6110028 | 1751520 | 0 | 19 | 2 | 0 | 18 | 26  | 10069460 | 9.44E-01 | 1 |
| NAPB     | 188695  | 688  | -19 | 812392  | 188324  | 0 | 1  | 1 | 0 | 50 | 79  | 22836332 | 9.44E-01 | 1 |
| LRTM2    | 245027  | 593  | 30  | 914208  | 287292  | 0 | 7  | 3 | 0 | 2  | 3   | 465292   | 9.44E-01 | 1 |
| CCNG1    | 226025  | 696  | 12  | 766468  | 205412  | 0 | 1  | 0 | 0 | 50 | 71  | 18478892 | 9.44E-01 | 1 |
| DYNC1LI2 | 804191  | 145  | 10  | 1278396 | 354576  | 0 | 1  | 1 | 0 | 50 | 63  | 22381720 | 9.44E-01 | 1 |
| CXCL1    | 233432  | 444  | 6   | 273408  | 87576   | 0 | 1  | 2 | 0 | 3  | 3   | 454968   | 9.44E-01 | 1 |
| AP4M1    | 1401098 | 205  | 46  | 1163408 | 353152  | 0 | 1  | 0 | 0 | 50 | 62  | 24927476 | 9.44E-01 | 1 |
| HEXA     | 1126741 | 366  | 48  | 1378788 | 374868  | 0 | 2  | 0 | 0 | 5  | 4   | 1817024  | 9.44E-01 | 1 |
| ITIH3    | 1193949 | 272  | 49  | 2330020 | 616592  | 0 | 4  | 2 | 0 | 50 | 63  | 22512372 | 9.44E-01 | 1 |
| DCAF15   | 930314  | 231  | 32  | 1531868 | 447136  | 0 | 2  | 3 | 0 | 24 | 40  | 9354256  | 9.44E-01 | 1 |
| METAP2   | 441602  | 328  | 18  | 1259172 | 318264  | 0 | 3  | 0 | 0 | 8  | 6   | 2232120  | 9.44E-01 | 1 |
| ACTR1B   | 362146  | 520  | 25  | 969388  | 281240  | 0 | 1  | 1 | 0 | 27 | 40  | 13121448 | 9.44E-01 | 1 |
| ZNF358   | 609287  | 308  | 36  | 1366328 | 463156  | 0 | 2  | 1 | 0 | 14 | 18  | 5583504  | 9.44E-01 | 1 |
| AP3M2    | 580110  | 382  | 45  | 1079748 | 296904  | 0 | 1  | 2 | 0 | 8  | 9   | 3483460  | 9.45E-01 | 1 |
| SLC16A7  | 22532   | 899  | -36 | 1207908 | 343896  | 0 | 3  | 3 | 0 | 4  | 5   | 1651484  | 9.45E-01 | 1 |
| CCDC148  | 133882  | 759  | -5  | 1637600 | 368104  | 0 | 2  | 1 | 0 | 18 | 15  | 6115012  | 9.45E-01 | 1 |
| LEMD2    | 1565139 | 428  | 28  | 1250628 | 400500  | 0 | 1  | 0 | 0 | 3  | 0   | 862944   | 9.45E-01 | 1 |
| ZBTB3    | 2405109 | 248  | 44  | 1383772 | 462800  | 0 | 5  | 1 | 0 | 4  | 7   | 1804564  | 9.45E-01 | 1 |
| DIP2A    | 895243  | 477  | 47  | 4043804 | 1265224 | 0 | 4  | 5 | 0 | 50 | 53  | 22697492 | 9.45E-01 | 1 |
| PKP4     | 212889  | 532  | 5   | 3020660 | 891424  | 0 | 6  | 3 | 0 | 50 | 58  | 21474276 | 9.45E-01 | 1 |
| ZNF853   | NaN     | NaN  | NaN | 1640448 | 482736  | 0 | 2  | 0 | 0 | 50 | 116 | 40128320 | 9.45E-01 | 1 |
| FMO3     | 395042  | 1004 | -11 | 1381992 | 359916  | 0 | 10 | 3 | 0 | 2  | 3   | 640444   | 9.45E-01 | 1 |
| DUSP8    | NaN     | NaN  | NaN | 1507660 | 519404  | 0 | 2  | 1 | 0 | 50 | 117 | 40164988 | 9.45E-01 | 1 |

|          |         |      |     |         |         |   |    |   |   |    |     |          |          |   |
|----------|---------|------|-----|---------|---------|---|----|---|---|----|-----|----------|----------|---|
| OR10J1   | 347588  | 699  | -5  | 789964  | 242792  | 0 | 2  | 3 | 0 | 12 | 18  | 3300832  | 9.45E-01 | 1 |
| PSMC1    | 318736  | 622  | 14  | 1150592 | 307228  | 0 | 1  | 0 | 0 | 50 | 63  | 24033204 | 9.45E-01 | 1 |
| LILRB1   | 978578  | 625  | -1  | 1656824 | 495196  | 0 | 3  | 3 | 0 | 50 | 108 | 22158508 | 9.45E-01 | 1 |
| LYAR     | 146135  | 584  | 35  | 1021008 | 230688  | 0 | 1  | 0 | 0 | 50 | 50  | 17705304 | 9.45E-01 | 1 |
| MOV10    | 559669  | 325  | 27  | 2540416 | 766112  | 0 | 5  | 2 | 0 | 50 | 65  | 23160292 | 9.45E-01 | 1 |
| FOXP3    | 547555  | NaN  | 25  | 1098972 | 332148  | 0 | 1  | 1 | 0 | 42 | 42  | 16120392 | 9.45E-01 | 1 |
| COMT     | 645345  | 217  | 24  | 678536  | 207904  | 0 | 2  | 3 | 0 | 1  | 4   | 647564   | 9.45E-01 | 1 |
| TRIM50   | 902769  | 422  | 52  | 1219656 | 369528  | 0 | 2  | 0 | 0 | 50 | 86  | 23744844 | 9.45E-01 | 1 |
| SLC43A1  | 923775  | 197  | 9   | 1427560 | 426488  | 0 | 2  | 1 | 0 | 50 | 53  | 18462160 | 9.45E-01 | 1 |
| SLC39A11 | 276039  | 538  | -34 | 865436  | 271984  | 0 | 1  | 0 | 0 | 50 | 69  | 19703532 | 9.45E-01 | 1 |
| PLG      | 181774  | 624  | -9  | 2120336 | 557140  | 0 | 3  | 2 | 0 | 50 | 68  | 26918584 | 9.45E-01 | 1 |
| IFT57    | 289544  | 711  | 11  | 1134572 | 285868  | 0 | 1  | 0 | 0 | 50 | 61  | 19059172 | 9.45E-01 | 1 |
| CCDC113  | 785059  | 347  | 15  | 993596  | 253828  | 0 | 2  | 2 | 0 | 9  | 13  | 3363132  | 9.45E-01 | 1 |
| PM20D1   | 699823  | 377  | 35  | 1295840 | 369172  | 0 | 2  | 3 | 0 | 16 | 28  | 8483836  | 9.45E-01 | 1 |
| TDRD5    | 599875  | 613  | -9  | 2526176 | 688504  | 0 | 5  | 3 | 0 | 50 | 65  | 21156368 | 9.45E-01 | 1 |
| AAMP     | 730654  | 197  | 33  | 1123536 | 315060  | 0 | 1  | 0 | 0 | 24 | 27  | 9730548  | 9.45E-01 | 1 |
| CUL5     | 421044  | 572  | 14  | 2085804 | 493416  | 0 | 5  | 1 | 0 | 50 | 63  | 19373876 | 9.45E-01 | 1 |
| PGA5     | 1124603 | 480  | 43  | 993596  | 289072  | 0 | 1  | 1 | 0 | 50 | 76  | 25756956 | 9.45E-01 | 1 |
| TNNT2    | 857879  | 209  | 26  | 868996  | 176576  | 0 | 1  | 2 | 0 | 39 | 38  | 11559676 | 9.45E-01 | 1 |
| VSX1     | 598947  | 563  | -8  | 969032  | 320044  | 0 | 1  | 0 | 0 | 50 | 58  | 18814956 | 9.45E-01 | 1 |
| AIFM2    | 484729  | 425  | 25  | 945892  | 286580  | 0 | 2  | 0 | 0 | 4  | 2   | 874336   | 9.45E-01 | 1 |
| DEFB125  | 86      | 430  | NaN | 391244  | 116056  | 0 | 1  | 1 | 0 | 6  | 9   | 1389824  | 9.45E-01 | 1 |
| S1PR2    | 1729517 | 200  | 31  | 843008  | 295480  | 0 | 1  | 1 | 0 | 50 | 94  | 24020032 | 9.45E-01 | 1 |
| ZAR1     | 310162  | 396  | 52  | 1032756 | 341760  | 0 | 1  | 0 | 0 | 50 | 60  | 20167400 | 9.45E-01 | 1 |
| WDR54    | 1069803 | 343  | 45  | 854044  | 258812  | 0 | 1  | 1 | 0 | 50 | 68  | 19848780 | 9.46E-01 | 1 |
| NKRF     | 663615  | NaN  | 48  | 1786052 | 488788  | 0 | 3  | 0 | 0 | 16 | 23  | 6519784  | 9.46E-01 | 1 |
| KRT7     | 742854  | 178  | 53  | 1186192 | 353864  | 0 | 2  | 2 | 0 | 50 | 77  | 19170956 | 9.46E-01 | 1 |
| NUP210L  | 2028800 | 184  | 37  | 4845872 | 1375228 | 0 | 15 | 3 | 0 | 0  | 3   | 1375228  | 9.46E-01 | 1 |
| FAM155A  | 73040   | 1144 | -37 | 1153440 | 325740  | 0 | 6  | 1 | 0 | 1  | 5   | 630832   | 9.46E-01 | 1 |
| TBL2     | 955146  | 171  | 48  | 1133504 | 327520  | 0 | 1  | 2 | 0 | 14 | 15  | 4918852  | 9.46E-01 | 1 |
| ZFAT     | 35738   | 963  | 15  | 3191184 | 858672  | 0 | 5  | 4 | 0 | 50 | 72  | 22511304 | 9.46E-01 | 1 |
| OTC      | 125559  | NaN  | 36  | 928092  | 247776  | 0 | 1  | 0 | 0 | 50 | 56  | 17194444 | 9.46E-01 | 1 |
| TAOK1    | 822855  | 224  | 26  | 2633688 | 657888  | 0 | 10 | 1 | 0 | 3  | 5   | 1645076  | 9.46E-01 | 1 |

|          |         |     |     |         |         |   |    |   |   |    |    |          |          |   |
|----------|---------|-----|-----|---------|---------|---|----|---|---|----|----|----------|----------|---|
| C11orf80 | 1534660 | 164 | 38  | 1748316 | 494484  | 0 | 3  | 0 | 0 | 22 | 37 | 12351776 | 9.46E-01 | 1 |
| F2RL2    | NaN     | NaN | NaN | 933432  | 272340  | 0 | 2  | 3 | 0 | 8  | 19 | 4198308  | 9.46E-01 | 1 |
| NUFIP2   | 1348501 | 128 | 32  | 1762912 | 482024  | 0 | 3  | 0 | 0 | 12 | 14 | 5358868  | 9.46E-01 | 1 |
| C12orf42 | 568754  | 897 | 2   | 913852  | 264152  | 0 | 1  | 2 | 0 | 5  | 8  | 2673560  | 9.46E-01 | 1 |
| CHST14   | 888588  | 192 | 47  | 900324  | 307584  | 0 | 1  | 1 | 0 | 38 | 56 | 17300888 | 9.46E-01 | 1 |
| TRAF5    | 298152  | 424 | 2   | 1470636 | 358848  | 0 | 1  | 1 | 0 | 50 | 54 | 21836684 | 9.46E-01 | 1 |
| ABCA3    | 2220466 | 233 | 46  | 4315432 | 1275548 | 0 | 7  | 3 | 0 | 18 | 22 | 8844820  | 9.46E-01 | 1 |
| ACTRT2   | 308009  | 634 | 19  | 928448  | 284800  | 0 | 1  | 2 | 0 | 16 | 20 | 6999672  | 9.46E-01 | 1 |
| RALBP1   | 472280  | 369 | 46  | 1712716 | 427556  | 0 | 3  | 3 | 0 | 13 | 14 | 3951244  | 9.46E-01 | 1 |
| LRRC45   | 3814891 | 211 | 28  | 1713784 | 504452  | 0 | 2  | 1 | 0 | 32 | 25 | 10015348 | 9.46E-01 | 1 |
| CD19     | 1189140 | 257 | 55  | 1438596 | 411180  | 0 | 4  | 3 | 0 | 7  | 10 | 2316848  | 9.46E-01 | 1 |
| DPY19L1  | 112453  | 935 | 0   | 1789612 | 466004  | 0 | 3  | 0 | 0 | 41 | 52 | 18697476 | 9.46E-01 | 1 |
| DENND4B  | 2028800 | 222 | 34  | 3687092 | 1224640 | 0 | 17 | 5 | 0 | 25 | 39 | 8426876  | 9.46E-01 | 1 |
| GALM     | 860461  | 176 | 27  | 870420  | 254184  | 0 | 2  | 3 | 0 | 4  | 4  | 1187616  | 9.46E-01 | 1 |
| PTCHD2   | 759100  | 482 | 25  | 3467084 | 1081528 | 0 | 11 | 8 | 0 | 8  | 14 | 4359932  | 9.46E-01 | 1 |
| THEG     | 901402  | 578 | -17 | 971524  | 278036  | 0 | 2  | 2 | 0 | 50 | 99 | 20859820 | 9.46E-01 | 1 |
| WNT7B    | 498719  | 270 | 28  | 884660  | 249556  | 0 | 1  | 2 | 0 | 24 | 27 | 8489176  | 9.46E-01 | 1 |
| SEMA4B   | 876945  | 154 | 52  | 2098264 | 642224  | 0 | 5  | 2 | 0 | 50 | 83 | 23818892 | 9.46E-01 | 1 |
| CLEC17A  | 1022856 | 198 | 29  | 779640  | 198648  | 0 | 1  | 1 | 0 | 50 | 85 | 21567548 | 9.46E-01 | 1 |
| GTF2IRD2 | 875900  | 173 | 54  | 2461740 | 646140  | 0 | 5  | 0 | 0 | 1  | 1  | 1105380  | 9.46E-01 | 1 |
| SOX18    | 1152034 | 208 | 48  | 910648  | 327164  | 0 | 1  | 0 | 0 | 50 | 78 | 24047088 | 9.46E-01 | 1 |
| LRWD1    | 642828  | 230 | 65  | 1635464 | 502672  | 0 | 2  | 1 | 0 | 6  | 4  | 2203640  | 9.46E-01 | 1 |
| PTPRZ1   | 64760   | 971 | -15 | 5910668 | 1633684 | 0 | 18 | 7 | 0 | 30 | 52 | 13576772 | 9.47E-01 | 1 |
| ADAM8    | 339279  | 452 | -12 | 2185840 | 468140  | 0 | 3  | 0 | 0 | 30 | 32 | 12924580 | 9.47E-01 | 1 |
| WFS1     | 418118  | 599 | 48  | 2215388 | 672484  | 0 | 3  | 2 | 0 | 38 | 34 | 13572144 | 9.47E-01 | 1 |
| BEND7    | 241076  | 532 | 25  | 1233896 | 351016  | 0 | 2  | 1 | 0 | 7  | 10 | 3391612  | 9.47E-01 | 1 |
| PATZ1    | 723505  | 237 | 57  | 1952304 | 569244  | 0 | 4  | 2 | 0 | 50 | 75 | 22402368 | 9.47E-01 | 1 |
| LAMB2    | 1898051 | 203 | 36  | 4542204 | 1354224 | 0 | 12 | 3 | 0 | 0  | 3  | 1354224  | 9.47E-01 | 1 |
| SUCLG1   | 293337  | 672 | -17 | 886440  | 259524  | 0 | 1  | 0 | 0 | 50 | 74 | 19405560 | 9.47E-01 | 1 |
| HIPK2    | 545030  | 522 | 37  | 3015676 | 885728  | 0 | 4  | 3 | 0 | 50 | 68 | 27916452 | 9.47E-01 | 1 |
| TTBK1    | 1293543 | 363 | 51  | 3228564 | 1066932 | 0 | 6  | 4 | 0 | 44 | 65 | 22785424 | 9.47E-01 | 1 |
| PPP1R8   | 717145  | 218 | 26  | 894984  | 260592  | 0 | 2  | 2 | 0 | 2  | 2  | 822360   | 9.47E-01 | 1 |
| OR52D1   | 99343   | 946 | -2  | 773588  | 252760  | 0 | 1  | 2 | 0 | 50 | 83 | 21652988 | 9.47E-01 | 1 |

|          |         |      |     |         |         |   |    |   |   |    |     |          |          |   |
|----------|---------|------|-----|---------|---------|---|----|---|---|----|-----|----------|----------|---|
| SSX2IP   | 335727  | 572  | -6  | 1643652 | 382344  | 0 | 2  | 0 | 0 | 12 | 12  | 3298696  | 9.47E-01 | 1 |
| CENPI    | 426524  | NaN  | 26  | 2016384 | 496620  | 0 | 2  | 1 | 0 | 50 | 50  | 22981580 | 9.47E-01 | 1 |
| NUDT12   | 201826  | 521  | 0   | 1192244 | 316840  | 0 | 1  | 0 | 0 | 38 | 43  | 17213312 | 9.47E-01 | 1 |
| PIGN     | 125694  | 442  | 28  | 2455688 | 650056  | 0 | 1  | 0 | 0 | 19 | 9   | 7707756  | 9.47E-01 | 1 |
| TRIM49   | 151171  | 1107 | -28 | 1189396 | 287648  | 0 | 3  | 2 | 0 | 50 | 137 | 28003316 | 9.47E-01 | 1 |
| DDOST    | 631461  | 208  | 35  | 1169104 | 337844  | 0 | 1  | 0 | 0 | 50 | 63  | 21866232 | 9.47E-01 | 1 |
| DHPS     | 1975767 | 409  | 1   | 956928  | 267000  | 0 | 3  | 4 | 0 | 5  | 13  | 2513360  | 9.47E-01 | 1 |
| MYOM2    | 104051  | 570  | -26 | 3836256 | 1014600 | 0 | 11 | 5 | 0 | 50 | 97  | 21899340 | 9.47E-01 | 1 |
| TET2     | 188424  | 632  | 24  | 5156660 | 1394452 | 0 | 8  | 3 | 0 | 50 | 42  | 19519124 | 9.47E-01 | 1 |
| FAM43A   | 406498  | 421  | 39  | 1018160 | 340336  | 0 | 1  | 0 | 0 | 50 | 65  | 22418032 | 9.47E-01 | 1 |
| SLC25A12 | 443171  | 185  | 35  | 1754724 | 495552  | 0 | 5  | 1 | 0 | 9  | 16  | 3941988  | 9.47E-01 | 1 |
| PTGIS    | 1117465 | 380  | 52  | 1270920 | 374868  | 0 | 3  | 1 | 0 | 50 | 75  | 19539416 | 9.47E-01 | 1 |
| SFMBT2   | 169112  | 363  | 12  | 2325392 | 627628  | 0 | 5  | 2 | 0 | 50 | 66  | 20980148 | 9.47E-01 | 1 |
| TAAR2    | 125852  | 605  | 19  | 894272  | 237808  | 0 | 1  | 0 | 0 | 50 | 67  | 19971956 | 9.47E-01 | 1 |
| RPE65    | 201619  | 477  | -16 | 1406556 | 362052  | 0 | 2  | 1 | 0 | 50 | 71  | 22141420 | 9.47E-01 | 1 |
| MYO1D    | 502828  | 818  | 5   | 2631908 | 686368  | 0 | 6  | 3 | 0 | 10 | 16  | 5810632  | 9.47E-01 | 1 |
| PLEKHM2  | 683349  | 174  | 22  | 2600580 | 748668  | 0 | 5  | 2 | 0 | 36 | 49  | 19723468 | 9.47E-01 | 1 |
| OPLAH    | 2720766 | 211  | 27  | 3196524 | 1048776 | 0 | 5  | 4 | 0 | 25 | 30  | 10299080 | 9.47E-01 | 1 |
| FBXO3    | 755929  | 424  | 15  | 1246356 | 318264  | 0 | 2  | 2 | 0 | 3  | 3   | 1430052  | 9.47E-01 | 1 |
| SLC5A12  | 52729   | 921  | -8  | 1584556 | 458528  | 0 | 2  | 1 | 0 | 50 | 68  | 24203016 | 9.47E-01 | 1 |
| APCS     | 492825  | 646  | -4  | 562480  | 161624  | 0 | 3  | 3 | 0 | 1  | 3   | 391956   | 9.47E-01 | 1 |
| OTUD5    | 834315  | NaN  | 40  | 1438240 | 435032  | 0 | 2  | 0 | 0 | 35 | 44  | 13840212 | 9.47E-01 | 1 |
| POM121C  | 806294  | 337  | 66  | 2396236 | 816308  | 0 | 4  | 4 | 0 | 8  | 10  | 3306172  | 9.47E-01 | 1 |
| PROC     | 443349  | 175  | 30  | 1199364 | 315060  | 0 | 2  | 1 | 0 | 16 | 16  | 4827360  | 9.48E-01 | 1 |
| TTC22    | 578299  | 343  | 23  | 1484520 | 475260  | 0 | 1  | 1 | 0 | 50 | 44  | 21555444 | 9.48E-01 | 1 |
| AFG3L2   | 492344  | 214  | 26  | 2051628 | 573516  | 0 | 6  | 1 | 0 | 4  | 5   | 1786052  | 9.48E-01 | 1 |
| ARRB2    | 1272092 | 222  | 28  | 1073340 | 300108  | 0 | 1  | 0 | 0 | 50 | 74  | 23892584 | 9.48E-01 | 1 |
| EME1     | 1335838 | 196  | 24  | 1484876 | 420436  | 0 | 2  | 1 | 0 | 50 | 70  | 22959864 | 9.48E-01 | 1 |
| WDR75    | 413405  | 503  | 12  | 2199012 | 551088  | 0 | 3  | 1 | 0 | 2  | 1   | 987544   | 9.48E-01 | 1 |
| PNKP     | 1673246 | 205  | 37  | 1335712 | 407264  | 0 | 2  | 3 | 0 | 13 | 23  | 7061972  | 9.48E-01 | 1 |
| ADAMTS2  | 1496298 | 677  | -4  | 3148464 | 904596  | 0 | 7  | 4 | 0 | 34 | 54  | 14663284 | 9.48E-01 | 1 |
| L1TD1    | 274287  | 422  | -1  | 2225356 | 553580  | 0 | 2  | 0 | 0 | 18 | 15  | 8095796  | 9.48E-01 | 1 |
| CBX6     | 1317460 | 358  | 54  | 1000716 | 341760  | 0 | 1  | 1 | 0 | 50 | 65  | 18953440 | 9.48E-01 | 1 |



|          |         |      |     |         |         |   |    |   |   |    |    |          |          |   |
|----------|---------|------|-----|---------|---------|---|----|---|---|----|----|----------|----------|---|
| TRAF3    | 719158  | 178  | 49  | 1490216 | 375580  | 0 | 3  | 2 | 0 | 50 | 57 | 15090840 | 9.48E-01 | 1 |
| IQGAP2   | 229166  | 675  | 34  | 4144196 | 1054828 | 0 | 10 | 2 | 0 | 32 | 49 | 14971224 | 9.48E-01 | 1 |
| STRN3    | 431319  | 370  | 14  | 2071564 | 557852  | 0 | 5  | 0 | 0 | 0  | 0  | 557852   | 9.48E-01 | 1 |
| XRCC6    | 1475100 | 183  | 50  | 1604492 | 401212  | 0 | 2  | 0 | 0 | 26 | 34 | 12579616 | 9.48E-01 | 1 |
| REC8     | 974559  | 220  | 41  | 1411896 | 421860  | 0 | 8  | 5 | 0 | 3  | 6  | 1006412  | 9.48E-01 | 1 |
| ACTG2    | 1036341 | 284  | 45  | 976508  | 267712  | 0 | 1  | 0 | 0 | 50 | 73 | 24714944 | 9.48E-01 | 1 |
| TTC21A   | 213514  | 500  | 30  | 3453200 | 902104  | 0 | 6  | 5 | 0 | 34 | 47 | 15558980 | 9.48E-01 | 1 |
| SEMA4C   | 822597  | 392  | 46  | 2080108 | 651836  | 0 | 5  | 5 | 0 | 13 | 20 | 5944132  | 9.48E-01 | 1 |
| KRTAP8-1 | 30244   | 1055 | -70 | 161268  | 45924   | 0 | 1  | 1 | 0 | 2  | 1  | 160912   | 9.48E-01 | 1 |
| ARHGAP2  | 164987  | 309  | -3  | 4985424 | 1393740 | 0 | 13 | 2 | 0 | 9  | 8  | 3680684  | 9.48E-01 | 1 |
| RPA1     | 1473497 | 224  | 18  | 1620156 | 425064  | 0 | 1  | 3 | 0 | 50 | 90 | 23672932 | 9.48E-01 | 1 |
| COL24A1  | 263693  | 863  | -12 | 4442168 | 1306876 | 0 | 14 | 3 | 0 | 8  | 9  | 3638676  | 9.48E-01 | 1 |
| LPPR4    | 100692  | 868  | -15 | 1913144 | 560344  | 0 | 4  | 5 | 0 | 6  | 15 | 3497700  | 9.49E-01 | 1 |
| GFI1     | 370328  | 580  | 1   | 1059456 | 321468  | 0 | 1  | 2 | 0 | 50 | 67 | 22579300 | 9.49E-01 | 1 |
| GLT8D2   | 1193959 | 281  | 37  | 925244  | 234604  | 0 | 1  | 2 | 0 | 44 | 53 | 16574648 | 9.49E-01 | 1 |
| ADAMTS5  | 33106   | 441  | -79 | 2307948 | 704880  | 0 | 7  | 3 | 0 | 32 | 40 | 9945928  | 9.49E-01 | 1 |
| TAS2R8   | 408176  | 517  | 12  | 779640  | 212532  | 0 | 1  | 3 | 0 | 5  | 3  | 1250628  | 9.49E-01 | 1 |
| MYCN     | 169653  | 1491 | -12 | 1134928 | 359204  | 0 | 6  | 4 | 0 | 2  | 7  | 1326456  | 9.49E-01 | 1 |
| ALOXE3   | 1455014 | 202  | 31  | 2139916 | 628340  | 0 | 3  | 0 | 0 | 15 | 15 | 6988280  | 9.49E-01 | 1 |
| CCDC88B  | 1610483 | 257  | 51  | 3657188 | 1188328 | 0 | 8  | 2 | 0 | 5  | 14 | 5199380  | 9.49E-01 | 1 |
| UBQLNL   | 99343   | 946  | -2  | 1189396 | 335708  | 0 | 2  | 2 | 0 | 50 | 83 | 21652988 | 9.49E-01 | 1 |
| FO XK2   | 2114072 | 155  | 26  | 1615172 | 536848  | 0 | 5  | 5 | 0 | 2  | 6  | 1430408  | 9.49E-01 | 1 |
| ZNF785   | 2214934 | 142  | 54  | 1013888 | 297616  | 0 | 4  | 4 | 0 | 5  | 13 | 2288012  | 9.49E-01 | 1 |
| WIPI2    | 1750164 | 417  | 34  | 1207196 | 336064  | 0 | 1  | 0 | 0 | 50 | 47 | 17226484 | 9.49E-01 | 1 |
| TDRD10   | 1804226 | 337  | 43  | 987544  | 272696  | 0 | 1  | 1 | 0 | 50 | 73 | 19734148 | 9.49E-01 | 1 |
| UNC13D   | 1727802 | 178  | 35  | 2795668 | 832328  | 0 | 6  | 3 | 0 | 25 | 44 | 12389512 | 9.49E-01 | 1 |
| SRRM1    | 466068  | 348  | 27  | 2250632 | 717340  | 0 | 4  | 0 | 0 | 2  | 1  | 958708   | 9.49E-01 | 1 |
| ZBTB48   | 628180  | 259  | 38  | 1760776 | 491636  | 0 | 4  | 3 | 0 | 46 | 63 | 18237524 | 9.49E-01 | 1 |
| LRPAP1   | 475773  | 609  | 54  | 925600  | 253472  | 0 | 2  | 1 | 0 | 6  | 7  | 1274124  | 9.49E-01 | 1 |
| RASA3    | 434290  | 406  | 58  | 2209692 | 563904  | 0 | 4  | 4 | 0 | 20 | 21 | 7325056  | 9.49E-01 | 1 |
| SLC25A5  | 617823  | NaN  | 30  | 747956  | 222856  | 0 | 1  | 1 | 0 | 28 | 51 | 12210800 | 9.49E-01 | 1 |
| FMNL2    | 289066  | 611  | 8   | 2855832 | 752940  | 0 | 5  | 3 | 0 | 50 | 66 | 24219036 | 9.49E-01 | 1 |
| DNM3     | 435280  | 643  | 6   | 2236036 | 617660  | 0 | 4  | 2 | 0 | 50 | 51 | 16943820 | 9.49E-01 | 1 |

|          |         |      |     |         |        |   |    |   |   |    |    |          |          |   |
|----------|---------|------|-----|---------|--------|---|----|---|---|----|----|----------|----------|---|
| IRX2     | 18983   | 986  | -29 | 1151304 | 378072 | 0 | 3  | 3 | 0 | 42 | 88 | 16235024 | 9.49E-01 | 1 |
| DHX37    | 1085697 | 229  | 46  | 2947324 | 876116 | 0 | 5  | 4 | 0 | 50 | 54 | 20728100 | 9.49E-01 | 1 |
| MCM6     | 469154  | 395  | 29  | 2129948 | 574228 | 0 | 5  | 3 | 0 | 50 | 78 | 22581436 | 9.49E-01 | 1 |
| TAF1A    | 228041  | 467  | -2  | 1213604 | 274120 | 0 | 1  | 1 | 0 | 32 | 31 | 12819560 | 9.49E-01 | 1 |
| SH2D3C   | 1194942 | 179  | 58  | 2251344 | 692064 | 0 | 5  | 2 | 0 | 17 | 32 | 8660768  | 9.49E-01 | 1 |
| LIG3     | 362649  | 525  | 15  | 2653268 | 725884 | 0 | 4  | 2 | 0 | 50 | 58 | 23206928 | 9.49E-01 | 1 |
| SLC26A4  | 515284  | 579  | 37  | 2008552 | 579212 | 0 | 8  | 5 | 0 | 2  | 5  | 908512   | 9.49E-01 | 1 |
| MFSD3    | 1755818 | 291  | 7   | 960488  | 381988 | 0 | 1  | 4 | 0 | 7  | 11 | 3540420  | 9.49E-01 | 1 |
| MAPKAP1  | 850799  | 475  | 38  | 1387332 | 352440 | 0 | 1  | 1 | 0 | 50 | 40 | 18879748 | 9.49E-01 | 1 |
| KIAA1211 | 460708  | 489  | 17  | 3077976 | 909936 | 0 | 6  | 2 | 0 | 50 | 62 | 21782928 | 9.49E-01 | 1 |
| C6orf118 | 31222   | 466  | -31 | 1212536 | 329656 | 0 | 3  | 1 | 0 | 50 | 98 | 20698552 | 9.49E-01 | 1 |
| LIPN     | 175532  | 327  | 31  | 1052336 | 258100 | 0 | 1  | 0 | 0 | 50 | 58 | 19686800 | 9.50E-01 | 1 |
| CHEK1    | 477807  | 595  | 18  | 1271988 | 311856 | 0 | 3  | 0 | 0 | 25 | 32 | 6874360  | 9.50E-01 | 1 |
| TRIM35   | 353563  | 561  | 8   | 1243864 | 362408 | 0 | 1  | 2 | 0 | 50 | 61 | 22463244 | 9.50E-01 | 1 |
| GNRHR    | 209065  | 767  | 35  | 885728  | 176932 | 0 | 2  | 2 | 0 | 5  | 9  | 2150952  | 9.50E-01 | 1 |
| OR4A5    | 68      | 1280 | -38 | 786048  | 230688 | 0 | 2  | 1 | 0 | 1  | 1  | 543968   | 9.50E-01 | 1 |
| LLGL2    | 1907659 | 195  | 31  | 2653268 | 789964 | 0 | 6  | 4 | 0 | 50 | 90 | 21830276 | 9.50E-01 | 1 |
| STK32C   | 148625  | 280  | 4   | 1256680 | 350660 | 0 | 2  | 0 | 0 | 2  | 0  | 610184   | 9.50E-01 | 1 |
| SIX4     | 352813  | 482  | 5   | 1913500 | 602708 | 0 | 5  | 0 | 0 | 0  | 0  | 602708   | 9.50E-01 | 1 |
| TAS2R39  | 321366  | 568  | -9  | 845856  | 239232 | 0 | 2  | 3 | 0 | 8  | 11 | 2366332  | 9.50E-01 | 1 |
| NCAPG    | 271201  | 1073 | 21  | 2641520 | 701320 | 0 | 2  | 0 | 0 | 19 | 14 | 9068032  | 9.50E-01 | 1 |
| CCDC130  | 767214  | 289  | 6   | 1026348 | 279816 | 0 | 1  | 2 | 0 | 50 | 92 | 27852728 | 9.50E-01 | 1 |
| ZNF804A  | 18097   | 1171 | 4   | 3079756 | 809900 | 0 | 17 | 7 | 0 | 3  | 12 | 1924536  | 9.50E-01 | 1 |
| UBE2D4   | 872910  | 239  | 44  | 401568  | 100392 | 0 | 1  | 1 | 0 | 2  | 6  | 913496   | 9.50E-01 | 1 |
| XPNPEP2  | 358809  | NaN  | 48  | 1764692 | 483448 | 0 | 2  | 2 | 0 | 50 | 64 | 23182008 | 9.50E-01 | 1 |
| ANTXR2   | 62176   | 905  | 6   | 1309724 | 370240 | 0 | 1  | 0 | 0 | 25 | 26 | 11416920 | 9.50E-01 | 1 |
| ABCF1    | 2080582 | 271  | 32  | 2239596 | 575652 | 0 | 3  | 0 | 0 | 24 | 27 | 11479576 | 9.50E-01 | 1 |
| PDK3     | 512129  | NaN  | 34  | 1093276 | 288716 | 0 | 1  | 2 | 0 | 50 | 78 | 21432980 | 9.50E-01 | 1 |
| NCKIPSD  | 1646019 | 212  | 45  | 1797088 | 572804 | 0 | 1  | 0 | 0 | 5  | 3  | 2853696  | 9.50E-01 | 1 |
| BTBD3    | 59672   | 322  | -61 | 1333220 | 355288 | 0 | 3  | 2 | 0 | 50 | 68 | 18866220 | 9.50E-01 | 1 |
| CDC37L1  | 228353  | 608  | 21  | 901392  | 207192 | 0 | 1  | 0 | 0 | 4  | 6  | 2162344  | 9.50E-01 | 1 |
| RANBP3   | 1166723 | 392  | 36  | 1478824 | 409400 | 0 | 3  | 0 | 0 | 0  | 0  | 409400   | 9.50E-01 | 1 |
| BMPER    | 20466   | 507  | -17 | 1797088 | 460664 | 0 | 4  | 1 | 0 | 50 | 73 | 20882604 | 9.50E-01 | 1 |

|          |         |      |     |         |         |   |    |    |   |    |     |          |          |   |
|----------|---------|------|-----|---------|---------|---|----|----|---|----|-----|----------|----------|---|
| SP5      | 318434  | 709  | 28  | 952656  | 330012  | 0 | 1  | 1  | 0 | 11 | 13  | 4395888  | 9.50E-01 | 1 |
| ETF1     | 1202314 | 205  | 51  | 1151304 | 294768  | 0 | 1  | 1  | 0 | 23 | 28  | 9944504  | 9.50E-01 | 1 |
| GNAT2    | 989433  | 201  | 29  | 938416  | 231044  | 0 | 1  | 0  | 0 | 50 | 79  | 23548688 | 9.50E-01 | 1 |
| GORASP2  | 414976  | 406  | 36  | 1129588 | 360272  | 0 | 1  | 0  | 0 | 48 | 56  | 21071640 | 9.50E-01 | 1 |
| IVD      | 880617  | 184  | 45  | 1104668 | 310432  | 0 | 1  | 1  | 0 | 44 | 61  | 19363196 | 9.50E-01 | 1 |
| CASKIN2  | 1918292 | 195  | 25  | 2939136 | 992172  | 0 | 6  | 1  | 0 | 15 | 21  | 7661832  | 9.50E-01 | 1 |
| GMPR2    | 915114  | 220  | 38  | 948384  | 261660  | 0 | 1  | 1  | 0 | 50 | 69  | 21077692 | 9.51E-01 | 1 |
| CNOT6    | 625675  | 485  | 17  | 1453904 | 380920  | 0 | 2  | 0  | 0 | 22 | 29  | 9407656  | 9.51E-01 | 1 |
| FRY      | 221552  | 488  | 40  | 7786076 | 2127100 | 0 | 26 | 11 | 0 | 9  | 24  | 5424372  | 9.51E-01 | 1 |
| TST      | 699535  | 379  | 44  | 731580  | 231756  | 0 | 4  | 2  | 0 | 2  | 4   | 695268   | 9.51E-01 | 1 |
| GRAMD2   | 1132082 | 352  | 26  | 940196  | 246352  | 0 | 1  | 2  | 0 | 24 | 29  | 8168420  | 9.51E-01 | 1 |
| IL20RB   | 137627  | 421  | 9   | 804560  | 220720  | 0 | 2  | 2  | 0 | 4  | 8   | 1727312  | 9.51E-01 | 1 |
| SPATA5L1 | 340172  | 254  | 10  | 1822008 | 623712  | 0 | 1  | 1  | 0 | 50 | 45  | 20758360 | 9.51E-01 | 1 |
| CSF3     | 1652518 | 216  | 28  | 520828  | 162692  | 0 | 1  | 2  | 0 | 4  | 17  | 2215032  | 9.51E-01 | 1 |
| SELPLG   | 448698  | 280  | 40  | 957996  | 341760  | 0 | 1  | 0  | 0 | 50 | 58  | 19104740 | 9.51E-01 | 1 |
| NUAK1    | 143018  | 473  | 7   | 1668216 | 478464  | 0 | 6  | 4  | 0 | 13 | 20  | 4272356  | 9.51E-01 | 1 |
| ZSCAN29  | 823006  | 415  | 50  | 2169108 | 580992  | 0 | 4  | 1  | 0 | 50 | 74  | 24588920 | 9.51E-01 | 1 |
| AGXT     | 1187158 | 297  | 30  | 996444  | 305448  | 0 | 1  | 1  | 0 | 10 | 14  | 4259540  | 9.51E-01 | 1 |
| ASB2     | 200153  | 600  | 30  | 1472772 | 441084  | 0 | 2  | 1  | 0 | 25 | 33  | 10893600 | 9.51E-01 | 1 |
| KCNT1    | 404991  | 494  | 38  | 3180504 | 909936  | 0 | 7  | 4  | 0 | 50 | 54  | 17973016 | 9.51E-01 | 1 |
| NUP88    | 1179795 | 474  | 24  | 1928096 | 519760  | 0 | 3  | 1  | 0 | 42 | 58  | 18912500 | 9.51E-01 | 1 |
| FREM1    | 254826  | 882  | -17 | 5645092 | 1544684 | 0 | 15 | 7  | 0 | 29 | 38  | 12294104 | 9.51E-01 | 1 |
| RCN1     | 251970  | 683  | -1  | 865792  | 219296  | 0 | 1  | 0  | 0 | 50 | 65  | 18605272 | 9.51E-01 | 1 |
| FAM149A  | 373525  | 536  | -13 | 1229980 | 364544  | 0 | 1  | 2  | 0 | 50 | 71  | 21317280 | 9.51E-01 | 1 |
| COX7B2   | 86349   | 938  | 11  | 211108  | 55892   | 0 | 1  | 1  | 0 | 1  | 3   | 306516   | 9.51E-01 | 1 |
| PRAMEF11 | NaN     | NaN  | NaN | 1101108 | 307584  | 0 | 3  | 4  | 0 | 8  | 20  | 4233552  | 9.51E-01 | 1 |
| TUT1     | 2695768 | 217  | 42  | 2229984 | 733716  | 0 | 4  | 2  | 0 | 17 | 27  | 9232504  | 9.51E-01 | 1 |
| TECPR1   | 464632  | 375  | 26  | 2995028 | 843364  | 0 | 8  | 2  | 0 | 6  | 4   | 1829484  | 9.51E-01 | 1 |
| BMP4     | 252916  | 645  | -3  | 1015312 | 303668  | 0 | 1  | 3  | 0 | 9  | 11  | 3310444  | 9.51E-01 | 1 |
| MARS     | 1347799 | 194  | 38  | 2320052 | 658600  | 0 | 2  | 1  | 0 | 20 | 34  | 11604176 | 9.51E-01 | 1 |
| RABGAP1  | 340132  | 482  | 34  | 2818452 | 716628  | 0 | 4  | 1  | 0 | 50 | 40  | 17123600 | 9.51E-01 | 1 |
| RUNX1T1  | 5155    | 1075 | -30 | 1556076 | 436812  | 0 | 6  | 3  | 0 | 50 | 124 | 25218684 | 9.51E-01 | 1 |
| DNAJC28  | 884788  | 182  | 63  | 1005700 | 244928  | 0 | 4  | 0  | 0 | 1  | 0   | 350660   | 9.51E-01 | 1 |

|          |         |     |     |         |         |   |    |   |   |    |    |          |          |   |
|----------|---------|-----|-----|---------|---------|---|----|---|---|----|----|----------|----------|---|
| SIAE     | 172228  | 604 | 18  | 1344612 | 372732  | 0 | 2  | 1 | 0 | 50 | 48 | 13956624 | 9.51E-01 | 1 |
| ITPRIP   | 293891  | 376 | 8   | 1349240 | 410824  | 0 | 1  | 2 | 0 | 50 | 51 | 20513788 | 9.51E-01 | 1 |
| FAM131B  | 379715  | 379 | 29  | 924888  | 257388  | 0 | 2  | 2 | 0 | 3  | 7  | 1614104  | 9.51E-01 | 1 |
| NLRP2    | 982889  | 432 | -21 | 2700260 | 756856  | 0 | 10 | 6 | 0 | 7  | 19 | 4696352  | 9.51E-01 | 1 |
| ALDH16A1 | 2173457 | 290 | 44  | 1965476 | 675688  | 0 | 8  | 6 | 0 | 14 | 25 | 5097208  | 9.51E-01 | 1 |
| WBSCR16  | 733800  | 220 | 50  | 1168392 | 364188  | 0 | 1  | 0 | 0 | 26 | 28 | 9856572  | 9.51E-01 | 1 |
| ISOC1    | 38196   | 985 | -2  | 746176  | 231044  | 0 | 1  | 1 | 0 | 50 | 84 | 17946672 | 9.51E-01 | 1 |
| ENPP1    | 168112  | 699 | -5  | 2468148 | 603420  | 0 | 5  | 2 | 0 | 24 | 35 | 11212932 | 9.51E-01 | 1 |
| UNC5CL   | 134733  | 565 | 32  | 1305808 | 391244  | 0 | 1  | 0 | 0 | 50 | 55 | 22917856 | 9.51E-01 | 1 |
| GRM5     | 158962  | 944 | -23 | 3033120 | 887508  | 0 | 19 | 7 | 0 | 10 | 25 | 3681752  | 9.51E-01 | 1 |
| NR2F6    | 865138  | 212 | 38  | 981848  | 328588  | 0 | 1  | 1 | 0 | 50 | 59 | 18864796 | 9.51E-01 | 1 |
| OR52R1   | 66543   | 987 | -3  | 771096  | 240300  | 0 | 1  | 1 | 0 | 50 | 67 | 17575720 | 9.52E-01 | 1 |
| KRT35    | 1445853 | 325 | -22 | 1153440 | 339624  | 0 | 3  | 0 | 0 | 2  | 3  | 1021364  | 9.52E-01 | 1 |
| FARP2    | 1221130 | 383 | 31  | 2736216 | 755076  | 0 | 6  | 2 | 0 | 14 | 17 | 5950184  | 9.52E-01 | 1 |
| MRPL37   | 465615  | 313 | 26  | 1070848 | 315416  | 0 | 4  | 4 | 0 | 11 | 19 | 3532232  | 9.52E-01 | 1 |
| PHACTR3  | 137383  | 818 | -29 | 1441088 | 404416  | 0 | 5  | 4 | 0 | 3  | 6  | 1672132  | 9.52E-01 | 1 |
| CASP14   | 990597  | 524 | 16  | 630832  | 171236  | 0 | 1  | 1 | 0 | 27 | 45 | 9464260  | 9.52E-01 | 1 |
| D2HGDH   | 960711  | 380 | 30  | 1291568 | 419368  | 0 | 1  | 0 | 0 | 50 | 47 | 19676120 | 9.52E-01 | 1 |
| CSNK1G1  | 743794  | 263 | 43  | 1109652 | 288360  | 0 | 3  | 0 | 0 | 4  | 6  | 1495556  | 9.52E-01 | 1 |
| RORA     | 231490  | 883 | 13  | 1782848 | 451408  | 0 | 3  | 2 | 0 | 50 | 67 | 19482100 | 9.52E-01 | 1 |
| MGAT5B   | 1010920 | 228 | 17  | 2103960 | 605556  | 0 | 7  | 6 | 0 | 14 | 17 | 4263100  | 9.52E-01 | 1 |
| CUL9     | 1308754 | 363 | 35  | 6358160 | 1880392 | 0 | 21 | 7 | 0 | 12 | 24 | 6411204  | 9.52E-01 | 1 |
| CCDC102A | 771506  | 159 | 45  | 1368820 | 426488  | 0 | 2  | 0 | 0 | 6  | 10 | 3627640  | 9.52E-01 | 1 |
| FYCO1    | 224232  | 519 | 54  | 3761496 | 1045572 | 0 | 4  | 3 | 0 | 39 | 37 | 16129648 | 9.52E-01 | 1 |
| SAP30BP  | 1898715 | 198 | 32  | 826276  | 208616  | 0 | 1  | 2 | 0 | 17 | 30 | 7129968  | 9.52E-01 | 1 |
| PRPSAP1  | 1622536 | 209 | 24  | 989324  | 285868  | 0 | 1  | 1 | 0 | 50 | 86 | 23974464 | 9.52E-01 | 1 |
| KIAA1147 | 213663  | 781 | 17  | 1166968 | 328232  | 0 | 1  | 0 | 0 | 17 | 17 | 6826300  | 9.52E-01 | 1 |
| MAP7D1   | 800052  | 190 | 31  | 2103604 | 662516  | 0 | 6  | 1 | 0 | 2  | 4  | 1583488  | 9.52E-01 | 1 |
| C19orf35 | 1603571 | 240 | 27  | 1106804 | 424708  | 0 | 1  | 1 | 0 | 50 | 66 | 21932448 | 9.52E-01 | 1 |
| SSH2     | 724760  | 390 | 21  | 3621588 | 1002852 | 0 | 11 | 2 | 0 | 10 | 19 | 6398388  | 9.52E-01 | 1 |
| SCYL2    | 184701  | 578 | 3   | 2417952 | 634392  | 0 | 4  | 2 | 0 | 50 | 44 | 17871200 | 9.52E-01 | 1 |
| PHGDH    | 425891  | 581 | 19  | 1337492 | 420436  | 0 | 2  | 2 | 0 | 32 | 42 | 12159536 | 9.52E-01 | 1 |
| CEP290   | 150984  | 429 | -18 | 6651860 | 1520476 | 0 | 7  | 2 | 0 | 27 | 18 | 11005384 | 9.52E-01 | 1 |

|         |         |     |     |          |         |   |    |    |   |    |     |          |          |   |
|---------|---------|-----|-----|----------|---------|---|----|----|---|----|-----|----------|----------|---|
| MIB2    | 1666776 | 248 | 31  | 2670000  | 846924  | 0 | 3  | 2  | 0 | 50 | 64  | 21384564 | 9.53E-01 | 1 |
| DMRT1   | 85434   | 622 | 8   | 939484   | 275900  | 0 | 4  | 2  | 0 | 2  | 4   | 907088   | 9.53E-01 | 1 |
| HCN2    | 1740226 | 218 | 1   | 2183704  | 699896  | 0 | 2  | 1  | 0 | 6  | 7   | 4213972  | 9.53E-01 | 1 |
| GABRA2  | 69760   | 992 | 3   | 1176580  | 310076  | 0 | 3  | 2  | 0 | 6  | 9   | 2222508  | 9.53E-01 | 1 |
| GALNT6  | 504747  | 239 | 33  | 1589896  | 445712  | 0 | 3  | 3  | 0 | 50 | 57  | 19104384 | 9.53E-01 | 1 |
| GTF3C5  | 1828532 | 402 | 50  | 1363480  | 372020  | 0 | 2  | 0  | 0 | 50 | 62  | 18209756 | 9.53E-01 | 1 |
| NKRD20A | NaN     | NaN | NaN | 2169464  | 530440  | 0 | 4  | 2  | 0 | 50 | 118 | 40176024 | 9.53E-01 | 1 |
| FAM91A1 | 483934  | 269 | 10  | 2206132  | 582416  | 0 | 4  | 4  | 0 | 14 | 35  | 8258132  | 9.53E-01 | 1 |
| SLC10A6 | 266749  | 603 | 40  | 953368   | 279104  | 0 | 1  | 1  | 0 | 50 | 48  | 15603480 | 9.53E-01 | 1 |
| MKS1    | 851306  | 401 | 14  | 1513712  | 412960  | 0 | 2  | 1  | 0 | 15 | 17  | 5719852  | 9.53E-01 | 1 |
| FAM161A | 758678  | 249 | 34  | 1706664  | 434676  | 0 | 10 | 3  | 0 | 1  | 5   | 1129232  | 9.53E-01 | 1 |
| CCDC112 | 273705  | 493 | 20  | 1410828  | 325740  | 0 | 1  | 0  | 0 | 50 | 49  | 22158864 | 9.53E-01 | 1 |
| RASGRF1 | 420514  | 488 | 42  | 3303680  | 893560  | 0 | 6  | 2  | 0 | 4  | 9   | 2910656  | 9.53E-01 | 1 |
| PLCB3   | 1613996 | 257 | 65  | 3164840  | 920260  | 0 | 10 | 7  | 0 | 19 | 29  | 6446448  | 9.53E-01 | 1 |
| MAP3K9  | 247989  | 426 | 43  | 2793888  | 842652  | 0 | 9  | 2  | 0 | 5  | 8   | 2008552  | 9.53E-01 | 1 |
| FGFR1OP | 169081  | 639 | 35  | 1054828  | 280172  | 0 | 1  | 0  | 0 | 26 | 27  | 9675012  | 9.53E-01 | 1 |
| DUSP9   | 1716845 | NaN | 44  | 931652   | 314704  | 0 | 1  | 1  | 0 | 50 | 73  | 19103672 | 9.53E-01 | 1 |
| FNDC1   | 805575  | 596 | 23  | 4662532  | 1503032 | 0 | 10 | 5  | 0 | 5  | 25  | 7169128  | 9.53E-01 | 1 |
| SNX4    | 319722  | 132 | 35  | 1208264  | 294412  | 0 | 1  | 1  | 0 | 50 | 46  | 17844856 | 9.53E-01 | 1 |
| HECTD1  | 431156  | 164 | 26  | 6692800  | 1852268 | 0 | 20 | 5  | 0 | 3  | 9   | 3300832  | 9.53E-01 | 1 |
| GATAD2B | 1697153 | 161 | 36  | 1506592  | 438236  | 0 | 2  | 1  | 0 | 34 | 56  | 17060588 | 9.53E-01 | 1 |
| HLA-DOB | 1373102 | 417 | 37  | 700964   | 200428  | 0 | 1  | 0  | 0 | 11 | 17  | 4212192  | 9.53E-01 | 1 |
| COL11A2 | 1474628 | 377 | 24  | 4431844  | 1489148 | 0 | 14 | 6  | 0 | 22 | 42  | 9267748  | 9.53E-01 | 1 |
| CUZD1   | 301441  | 588 | 12  | 1563196  | 419012  | 0 | 2  | 0  | 0 | 12 | 19  | 4510164  | 9.53E-01 | 1 |
| SBNO1   | 1090982 | 125 | 37  | 3631200  | 963336  | 0 | 13 | 3  | 0 | 19 | 43  | 11852308 | 9.53E-01 | 1 |
| AP2M1   | 1456939 | 257 | 45  | 1173376  | 267356  | 0 | 1  | 0  | 0 | 27 | 40  | 13815648 | 9.53E-01 | 1 |
| C2orf71 | 471053  | 404 | 28  | 3173740  | 960488  | 0 | 7  | 3  | 0 | 24 | 46  | 13239640 | 9.53E-01 | 1 |
| PICK1   | 1478013 | 200 | 76  | 1089716  | 294412  | 0 | 1  | 1  | 0 | 50 | 52  | 18287364 | 9.53E-01 | 1 |
| PDCD2L  | 689668  | 292 | 2   | 925244   | 254896  | 0 | 1  | 3  | 0 | 8  | 8   | 2930236  | 9.53E-01 | 1 |
| DNAH3   | 335315  | 549 | 29  | 10637280 | 2813112 | 0 | 39 | 17 | 0 | 19 | 32  | 8714880  | 9.53E-01 | 1 |
| DISC1   | 236101  | 622 | -3  | 2921692  | 752228  | 0 | 3  | 0  | 0 | 13 | 7   | 4344624  | 9.53E-01 | 1 |
| ZNF33A  | 139504  | 916 | -19 | 2128524  | 490212  | 0 | 4  | 2  | 0 | 9  | 15  | 4259540  | 9.54E-01 | 1 |
| ACVR1B  | 493265  | 371 | 27  | 1398724  | 394448  | 0 | 1  | 1  | 0 | 7  | 4   | 2520480  | 9.54E-01 | 1 |

|         |         |     |     |         |         |   |    |   |   |    |    |          |          |   |
|---------|---------|-----|-----|---------|---------|---|----|---|---|----|----|----------|----------|---|
| SLC6A18 | 657890  | 541 | 24  | 1586336 | 475972  | 0 | 3  | 3 | 0 | 33 | 54 | 17107224 | 9.54E-01 | 1 |
| BIK     | 624112  | 241 | 48  | 410468  | 122464  | 0 | 1  | 2 | 0 | 4  | 7  | 1169460  | 9.54E-01 | 1 |
| CD4     | 2819394 | 232 | 40  | 1178716 | 330368  | 0 | 2  | 2 | 0 | 36 | 48 | 14117536 | 9.54E-01 | 1 |
| HBP1    | 249919  | 627 | 12  | 1355292 | 337488  | 0 | 1  | 0 | 0 | 20 | 30 | 13166304 | 9.54E-01 | 1 |
| FRYL    | 287083  | 428 | 52  | 7840188 | 2077260 | 0 | 17 | 9 | 0 | 29 | 35 | 14612732 | 9.54E-01 | 1 |
| RPS7    | 253814  | 371 | 14  | 514776  | 137772  | 0 | 2  | 2 | 0 | 3  | 6  | 869708   | 9.54E-01 | 1 |
| SNAPC4  | 1194160 | 258 | 28  | 3645440 | 1160560 | 0 | 4  | 5 | 0 | 50 | 42 | 16832036 | 9.54E-01 | 1 |
| CTSA    | 725555  | 209 | 59  | 1303672 | 361340  | 0 | 2  | 1 | 0 | 27 | 40 | 9561092  | 9.54E-01 | 1 |
| PZP     | 352696  | 301 | 19  | 3830560 | 1072628 | 0 | 13 | 4 | 0 | 3  | 8  | 2497696  | 9.54E-01 | 1 |
| KIF4B   | 516166  | 461 | 38  | 3116068 | 840872  | 0 | 6  | 3 | 0 | 34 | 40 | 13986172 | 9.54E-01 | 1 |
| VEGFC   | 145765  | 585 | -14 | 1093632 | 280884  | 0 | 2  | 1 | 0 | 4  | 7  | 2060172  | 9.54E-01 | 1 |
| RMI1    | 458954  | 343 | 14  | 1584912 | 425064  | 0 | 4  | 1 | 0 | 29 | 48 | 13606676 | 9.54E-01 | 1 |
| HDAC10  | 944000  | 242 | 49  | 1676048 | 551800  | 0 | 2  | 3 | 0 | 50 | 67 | 23711024 | 9.54E-01 | 1 |
| GAL3ST2 | 598219  | 487 | 29  | 970456  | 320756  | 0 | 1  | 0 | 0 | 50 | 85 | 26481416 | 9.54E-01 | 1 |
| GLCE    | 367968  | 218 | 35  | 1570672 | 422216  | 0 | 4  | 1 | 0 | 4  | 7  | 2213252  | 9.54E-01 | 1 |
| LRRC42  | 430138  | 201 | 31  | 1100752 | 303668  | 0 | 1  | 2 | 0 | 50 | 52 | 17828480 | 9.54E-01 | 1 |
| SIM2    | 451019  | 447 | 47  | 1780712 | 548596  | 0 | 3  | 3 | 0 | 23 | 30 | 10320796 | 9.54E-01 | 1 |
| NONO    | 728362  | NaN | 26  | 1231760 | 323248  | 0 | 1  | 0 | 0 | 50 | 84 | 28751272 | 9.54E-01 | 1 |
| PTPRG   | 223467  | 890 | 7   | 3762920 | 993952  | 0 | 11 | 7 | 0 | 18 | 32 | 8246740  | 9.54E-01 | 1 |
| ANKRD33 | 570716  | 438 | 22  | 1195448 | 342472  | 0 | 1  | 0 | 0 | 22 | 25 | 10128200 | 9.54E-01 | 1 |
| OSBPL9  | 586185  | 288 | 18  | 2066580 | 504096  | 0 | 3  | 0 | 0 | 13 | 18 | 6838404  | 9.54E-01 | 1 |
| USP30   | 592814  | 487 | 20  | 1339984 | 370952  | 0 | 3  | 0 | 0 | 23 | 33 | 8751904  | 9.54E-01 | 1 |
| OR14C36 | 104321  | 936 | -39 | 765756  | 234960  | 0 | 5  | 4 | 0 | 9  | 22 | 2442516  | 9.54E-01 | 1 |
| SOX4    | 117516  | 676 | 1   | 1132792 | 389108  | 0 | 2  | 2 | 0 | 14 | 18 | 4975812  | 9.54E-01 | 1 |
| NMUR2   | 261658  | 955 | 4   | 1046284 | 299396  | 0 | 1  | 1 | 0 | 50 | 87 | 24234700 | 9.54E-01 | 1 |
| ITGB5   | 330119  | 254 | 40  | 2061240 | 561768  | 0 | 3  | 2 | 0 | 50 | 50 | 18077324 | 9.54E-01 | 1 |
| RASSF7  | 1970020 | 236 | 42  | 952656  | 332148  | 0 | 1  | 1 | 0 | 50 | 66 | 20259248 | 9.54E-01 | 1 |
| EHD3    | 102236  | 884 | 15  | 1357428 | 381276  | 0 | 2  | 3 | 0 | 40 | 51 | 14956272 | 9.54E-01 | 1 |
| GCLC    | 363341  | 337 | 24  | 1681032 | 427200  | 0 | 6  | 3 | 0 | 2  | 5  | 1410116  | 9.55E-01 | 1 |
| OMD     | 537639  | 574 | 47  | 1093988 | 266644  | 0 | 1  | 0 | 0 | 50 | 52 | 17802848 | 9.55E-01 | 1 |
| ENPP4   | 64703   | 791 | 12  | 1164832 | 302600  | 0 | 1  | 0 | 0 | 50 | 52 | 20330092 | 9.55E-01 | 1 |
| HAS1    | 436280  | 690 | -24 | 1399080 | 475260  | 0 | 2  | 1 | 0 | 50 | 53 | 16569308 | 9.55E-01 | 1 |
| IRS2    | 217826  | 438 | 4   | 3176588 | 1117840 | 0 | 2  | 2 | 0 | 14 | 12 | 5974036  | 9.55E-01 | 1 |

|          |         |      |     |         |         |   |    |   |   |    |     |          |          |   |
|----------|---------|------|-----|---------|---------|---|----|---|---|----|-----|----------|----------|---|
| RELT     | 561848  | 218  | 56  | 1079036 | 344608  | 0 | 1  | 2 | 0 | 50 | 64  | 21419452 | 9.55E-01 | 1 |
| ZBTB16   | 162787  | 529  | -6  | 1712004 | 473124  | 0 | 2  | 2 | 0 | 50 | 65  | 22986564 | 9.55E-01 | 1 |
| RBPJ     | 178487  | 597  | 36  | 1356716 | 358492  | 0 | 2  | 0 | 0 | 18 | 21  | 6595968  | 9.55E-01 | 1 |
| SHPK     | 504736  | 354  | 20  | 1187972 | 373444  | 0 | 1  | 2 | 0 | 50 | 62  | 23395252 | 9.55E-01 | 1 |
| ILDR1    | 524127  | 715  | 38  | 1275192 | 362052  | 0 | 1  | 0 | 0 | 27 | 30  | 12290188 | 9.55E-01 | 1 |
| KCNAB3   | 1794630 | 337  | 33  | 1046996 | 306160  | 0 | 1  | 0 | 0 | 45 | 62  | 18104736 | 9.55E-01 | 1 |
| PRG4     | 265627  | 419  | -24 | 3444300 | 1110720 | 0 | 10 | 2 | 0 | 2  | 9   | 2288724  | 9.55E-01 | 1 |
| OR52E6   | 203856  | 922  | -5  | 776436  | 227484  | 0 | 1  | 2 | 0 | 5  | 6   | 1890360  | 9.55E-01 | 1 |
| ARRDC2   | 1291557 | 226  | 34  | 1199720 | 416164  | 0 | 2  | 1 | 0 | 50 | 74  | 18619868 | 9.55E-01 | 1 |
| GAK      | 679769  | 256  | 41  | 3339636 | 979356  | 0 | 10 | 6 | 0 | 12 | 19  | 4883964  | 9.55E-01 | 1 |
| FAM53C   | 1312427 | 273  | 36  | 962624  | 309364  | 0 | 1  | 0 | 0 | 50 | 73  | 22485672 | 9.55E-01 | 1 |
| ZNF519   | 134820  | 933  | -24 | 1413676 | 328232  | 0 | 3  | 2 | 0 | 50 | 105 | 25777960 | 9.55E-01 | 1 |
| SERPING1 | 923607  | 249  | 32  | 1262376 | 374868  | 0 | 2  | 3 | 0 | 12 | 17  | 4985780  | 9.55E-01 | 1 |
| DIO2     | 47674   | 533  | -44 | 777860  | 230332  | 0 | 1  | 1 | 0 | 14 | 22  | 6013196  | 9.55E-01 | 1 |
| BCKDHB   | 131029  | 869  | -9  | 1018872 | 285156  | 0 | 1  | 0 | 0 | 50 | 94  | 31502440 | 9.55E-01 | 1 |
| FAM69C   | 162468  | 969  | 7   | 1043080 | 317552  | 0 | 1  | 0 | 0 | 43 | 51  | 17208684 | 9.55E-01 | 1 |
| DPP6     | 32056   | 1019 | -25 | 2380572 | 620508  | 0 | 5  | 2 | 0 | 29 | 67  | 15637656 | 9.55E-01 | 1 |
| CSK      | 746043  | 199  | 41  | 1173020 | 323248  | 0 | 6  | 4 | 0 | 2  | 7   | 1086868  | 9.55E-01 | 1 |
| HOXC4    | 1185281 | 279  | 54  | 669992  | 189748  | 0 | 1  | 1 | 0 | 14 | 21  | 4635120  | 9.55E-01 | 1 |
| OXCT2    | 975799  | 388  | 39  | 1259528 | 402280  | 0 | 2  | 0 | 0 | 4  | 5   | 1799580  | 9.55E-01 | 1 |
| WNK4     | 1633092 | 190  | 33  | 3068364 | 996444  | 0 | 7  | 4 | 0 | 24 | 22  | 8134244  | 9.55E-01 | 1 |
| FATE1    | 125659  | NaN  | 4   | 476328  | 132432  | 0 | 1  | 2 | 0 | 9  | 14  | 2346396  | 9.55E-01 | 1 |
| GPATCH2  | 42648   | 1015 | -18 | 1379500 | 356000  | 0 | 2  | 1 | 0 | 50 | 70  | 20423720 | 9.55E-01 | 1 |
| IFT52    | 370278  | 303  | 11  | 1164476 | 294412  | 0 | 1  | 1 | 0 | 6  | 7   | 2787836  | 9.55E-01 | 1 |
| FLNA     | 2356905 | NaN  | 27  | 6688528 | 1992176 | 0 | 12 | 9 | 0 | 13 | 23  | 8346776  | 9.55E-01 | 1 |
| NKPD1    | 1230654 | 243  | 41  | 2017096 | 664652  | 0 | 3  | 3 | 0 | 50 | 79  | 24609568 | 9.55E-01 | 1 |
| FBN1     | 399245  | 304  | -1  | 7624452 | 1850844 | 0 | 24 | 7 | 0 | 4  | 11  | 3718064  | 9.55E-01 | 1 |
| APOBEC3C | 1386387 | 372  | 71  | 1018160 | 245284  | 0 | 1  | 2 | 0 | 50 | 61  | 16059872 | 9.55E-01 | 1 |
| FETUB    | 508316  | 436  | 45  | 969388  | 285512  | 0 | 6  | 4 | 0 | 2  | 6   | 933788   | 9.55E-01 | 1 |
| HECA     | 202042  | 674  | 13  | 1363836 | 391956  | 0 | 2  | 0 | 0 | 38 | 51  | 13998988 | 9.55E-01 | 1 |
| NPTX2    | 545145  | 560  | 20  | 1061948 | 339268  | 0 | 1  | 2 | 0 | 50 | 59  | 19225780 | 9.56E-01 | 1 |
| KCTD14   | 556958  | 209  | 38  | 641156  | 185476  | 0 | 1  | 2 | 0 | 4  | 11  | 2266652  | 9.56E-01 | 1 |
| DACH2    | 49531   | NaN  | -32 | 1547176 | 433964  | 0 | 1  | 1 | 0 | 32 | 63  | 14783968 | 9.56E-01 | 1 |

|         |         |      |     |          |         |   |    |    |   |    |    |          |          |   |
|---------|---------|------|-----|----------|---------|---|----|----|---|----|----|----------|----------|---|
| GPATCH8 | 1121044 | 166  | 30  | 3763988  | 1083664 | 0 | 13 | 2  | 0 | 1  | 2  | 1186904  | 9.56E-01 | 1 |
| POTEF   | 347607  | 560  | 4   | 2801364  | 710220  | 0 | 7  | 2  | 0 | 50 | 71 | 22357512 | 9.56E-01 | 1 |
| RNF180  | 56176   | 941  | -5  | 1556432  | 396940  | 0 | 4  | 2  | 0 | 50 | 80 | 19418020 | 9.56E-01 | 1 |
| CYP4F22 | 772367  | 543  | 20  | 1363124  | 391600  | 0 | 2  | 2  | 0 | 6  | 2  | 1187616  | 9.56E-01 | 1 |
| CCR2    | 228487  | 625  | 39  | 1044148  | 315416  | 0 | 1  | 1  | 0 | 50 | 50 | 15010028 | 9.56E-01 | 1 |
| AFAP1   | 166375  | 260  | 38  | 2088296  | 595588  | 0 | 6  | 5  | 0 | 5  | 12 | 2193316  | 9.56E-01 | 1 |
| SLC12A4 | 871877  | 158  | 52  | 2965124  | 856180  | 0 | 8  | 4  | 0 | 50 | 83 | 23981940 | 9.56E-01 | 1 |
| GFRA3   | 1219794 | 273  | 43  | 1018516  | 296192  | 0 | 1  | 1  | 0 | 50 | 87 | 28035356 | 9.56E-01 | 1 |
| SOHLH2  | 81451   | 880  | -44 | 1110008  | 299752  | 0 | 2  | 1  | 0 | 25 | 29 | 7285540  | 9.56E-01 | 1 |
| KREMEN1 | 794944  | 335  | -4  | 1271988  | 358848  | 0 | 2  | 0  | 0 | 1  | 0  | 594876   | 9.56E-01 | 1 |
| DZIP3   | 172270  | 941  | 0   | 3231056  | 779284  | 0 | 8  | 2  | 0 | 27 | 41 | 14292332 | 9.56E-01 | 1 |
| EFHC1   | 396934  | 431  | 34  | 1667148  | 437880  | 0 | 2  | 2  | 0 | 50 | 59 | 19996876 | 9.56E-01 | 1 |
| USP46   | 115480  | 870  | 12  | 991460   | 236740  | 0 | 1  | 0  | 0 | 50 | 64 | 20216884 | 9.56E-01 | 1 |
| PCLO    | 42656   | 1075 | -27 | 12827036 | 3769684 | 0 | 45 | 11 | 0 | 5  | 18 | 5027076  | 9.56E-01 | 1 |
| IL1B    | 578617  | 298  | 38  | 716628   | 174084  | 0 | 2  | 3  | 0 | 3  | 6  | 1248492  | 9.56E-01 | 1 |
| PCOLCE2 | 398812  | 422  | 15  | 1074764  | 292276  | 0 | 1  | 1  | 0 | 50 | 54 | 17910716 | 9.56E-01 | 1 |
| ZNF132  | 2179183 | 270  | -4  | 1816668  | 457104  | 0 | 3  | 1  | 0 | 50 | 76 | 25634848 | 9.56E-01 | 1 |
| RTF1    | 820644  | 237  | 37  | 1877900  | 474904  | 0 | 2  | 0  | 0 | 12 | 10 | 4741208  | 9.56E-01 | 1 |
| DYNC2H1 | 134215  | 883  | -19 | 11304780 | 2900688 | 0 | 19 | 4  | 0 | 2  | 7  | 4393396  | 9.56E-01 | 1 |
| KLHL36  | 567037  | 187  | 33  | 1538632  | 455324  | 0 | 3  | 3  | 0 | 16 | 27 | 7619468  | 9.56E-01 | 1 |
| LRSAM1  | 784133  | 209  | 45  | 1917772  | 504452  | 0 | 6  | 3  | 0 | 7  | 9  | 2007484  | 9.56E-01 | 1 |
| TM7SF2  | 3267059 | 207  | 46  | 1043792  | 337132  | 0 | 1  | 2  | 0 | 50 | 74 | 20482816 | 9.56E-01 | 1 |
| MAP1S   | 1181745 | 246  | 21  | 2516564  | 909580  | 0 | 4  | 1  | 0 | 30 | 42 | 15709212 | 9.56E-01 | 1 |
| AK5     | 484699  | 536  | -8  | 1479180  | 380208  | 0 | 4  | 3  | 0 | 38 | 41 | 11751560 | 9.56E-01 | 1 |
| ZNF175  | 328446  | 627  | -26 | 1850488  | 443576  | 0 | 3  | 3  | 0 | 31 | 56 | 15991520 | 9.57E-01 | 1 |
| SS18L1  | 861466  | 288  | -13 | 1049488  | 267356  | 0 | 1  | 1  | 0 | 25 | 32 | 9886476  | 9.57E-01 | 1 |
| DEAF1   | 1774224 | 236  | 57  | 1426492  | 433964  | 0 | 1  | 1  | 0 | 50 | 45 | 17867640 | 9.57E-01 | 1 |
| EIF5B   | 387331  | 612  | 25  | 3239600  | 770740  | 0 | 10 | 3  | 0 | 3  | 6  | 1983276  | 9.57E-01 | 1 |
| CKMT1B  | 794398  | 269  | 37  | 1048776  | 324672  | 0 | 1  | 0  | 0 | 18 | 30 | 10348564 | 9.57E-01 | 1 |
| ZBTB43  | 247985  | 252  | 46  | 1194024  | 309720  | 0 | 1  | 0  | 0 | 50 | 55 | 20675056 | 9.57E-01 | 1 |
| ERRFI1  | 387339  | 207  | 26  | 1152728  | 343540  | 0 | 1  | 1  | 0 | 21 | 24 | 9239624  | 9.57E-01 | 1 |
| MAST1   | 1937827 | 226  | 32  | 3902472  | 1239948 | 0 | 12 | 8  | 0 | 6  | 10 | 2714856  | 9.57E-01 | 1 |
| TFPT    | 735613  | 439  | -53 | 634392   | 205056  | 0 | 1  | 0  | 0 | 18 | 36 | 7425804  | 9.57E-01 | 1 |



|          |         |     |     |          |         |   |    |    |   |    |    |          |          |   |
|----------|---------|-----|-----|----------|---------|---|----|----|---|----|----|----------|----------|---|
| LRCH4    | 1651125 | 242 | 60  | 1695984  | 570312  | 0 | 3  | 2  | 0 | 46 | 58 | 16249976 | 9.57E-01 | 1 |
| GLP2R    | 76286   | 212 | -53 | 1420796  | 405484  | 0 | 2  | 1  | 0 | 26 | 43 | 12639780 | 9.57E-01 | 1 |
| FABP1    | 180956  | 612 | 6   | 344608   | 82592   | 0 | 1  | 1  | 0 | 1  | 2  | 438236   | 9.57E-01 | 1 |
| MMRN1    | 39671   | 703 | -11 | 3128172  | 841584  | 0 | 7  | 3  | 0 | 21 | 46 | 14661148 | 9.57E-01 | 1 |
| LILRB2   | 717623  | 458 | -6  | 1510508  | 464224  | 0 | 2  | 3  | 0 | 50 | 58 | 18028196 | 9.57E-01 | 1 |
| FOXO1    | 237876  | 449 | 55  | 1628344  | 482024  | 0 | 2  | 1  | 0 | 43 | 62 | 21325468 | 9.57E-01 | 1 |
| SNX13    | 139013  | 585 | -4  | 2547180  | 629052  | 0 | 4  | 0  | 0 | 8  | 10 | 4328248  | 9.57E-01 | 1 |
| RHBDF1   | 1005761 | 238 | 36  | 2176228  | 639020  | 0 | 3  | 2  | 0 | 50 | 46 | 16624132 | 9.57E-01 | 1 |
| GPN3     | 943393  | 206 | 47  | 937348   | 222500  | 0 | 1  | 0  | 0 | 17 | 22 | 6683188  | 9.57E-01 | 1 |
| CAMLG    | 910140  | 193 | 33  | 745108   | 219296  | 0 | 3  | 3  | 0 | 1  | 3  | 400500   | 9.57E-01 | 1 |
| SREBF1   | 1129921 | 260 | 21  | 2881820  | 973660  | 0 | 4  | 0  | 0 | 0  | 0  | 973660   | 9.57E-01 | 1 |
| ANGPTL5  | 416999  | 514 | -21 | 1033112  | 247420  | 0 | 2  | 0  | 0 | 8  | 15 | 3825576  | 9.57E-01 | 1 |
| GLTSCR2  | 812020  | 262 | 36  | 1207552  | 382700  | 0 | 1  | 1  | 0 | 50 | 64 | 23225796 | 9.57E-01 | 1 |
| PAK4     | 1652029 | 286 | 26  | 1446072  | 484872  | 0 | 1  | 0  | 0 | 5  | 2  | 1706308  | 9.57E-01 | 1 |
| ARR3     | 188610  | NaN | 39  | 1029552  | 287292  | 0 | 1  | 0  | 0 | 38 | 58 | 18272768 | 9.57E-01 | 1 |
| CNKSR3   | 109534  | 588 | 14  | 1424000  | 408688  | 0 | 6  | 3  | 0 | 1  | 3  | 707372   | 9.57E-01 | 1 |
| RGP1     | 922448  | 190 | 48  | 1079748  | 341760  | 0 | 1  | 2  | 0 | 31 | 42 | 12963384 | 9.57E-01 | 1 |
| SLC6A8   | 1716845 | NaN | 44  | 1614104  | 474904  | 0 | 3  | 1  | 0 | 41 | 64 | 16780772 | 9.57E-01 | 1 |
| RAD50    | 715524  | 320 | 48  | 3491292  | 818088  | 0 | 8  | 0  | 0 | 1  | 1  | 1009260  | 9.57E-01 | 1 |
| ADCY7    | 304156  | 520 | 21  | 2746540  | 819512  | 0 | 4  | 5  | 0 | 7  | 14 | 3940208  | 9.57E-01 | 1 |
| PAM      | 206242  | 550 | 9   | 2553944  | 672484  | 0 | 3  | 2  | 0 | 24 | 31 | 12015356 | 9.57E-01 | 1 |
| FAT2     | 731456  | 563 | 27  | 10783952 | 3249568 | 0 | 28 | 12 | 0 | 16 | 26 | 10130692 | 9.57E-01 | 1 |
| TUBE1    | 152199  | 296 | 5   | 1253120  | 321112  | 0 | 1  | 0  | 0 | 2  | 0  | 580636   | 9.57E-01 | 1 |
| RHBDL1   | 1207790 | 194 | 33  | 1085800  | 348524  | 0 | 1  | 0  | 0 | 17 | 19 | 6751184  | 9.57E-01 | 1 |
| CENPJ    | 481837  | 639 | 18  | 3495208  | 863300  | 0 | 11 | 3  | 0 | 50 | 62 | 17657956 | 9.57E-01 | 1 |
| ABCF3    | 1460188 | 257 | 49  | 1837316  | 522964  | 0 | 3  | 2  | 0 | 50 | 68 | 20724896 | 9.58E-01 | 1 |
| DNAH10   | 1032254 | 482 | 39  | 11562524 | 3096844 | 0 | 27 | 16 | 0 | 47 | 58 | 21039244 | 9.58E-01 | 1 |
| KRT3     | 1444461 | 422 | 38  | 1576724  | 474904  | 0 | 3  | 3  | 0 | 20 | 23 | 7791060  | 9.58E-01 | 1 |
| EBNA1BP2 | 1068006 | 294 | 30  | 957640   | 244928  | 0 | 2  | 2  | 0 | 2  | 2  | 829124   | 9.58E-01 | 1 |
| CASZ1    | 809310  | 433 | 27  | 4405500  | 1312572 | 0 | 8  | 5  | 0 | 50 | 58 | 23799668 | 9.58E-01 | 1 |
| HYDIN    | 592186  | 723 | 1   | 13169152 | 3616604 | 0 | 21 | 4  | 0 | 9  | 10 | 6657556  | 9.58E-01 | 1 |
| AZGP1    | 1584669 | 391 | 36  | 768960   | 203988  | 0 | 1  | 2  | 0 | 14 | 22 | 5504472  | 9.58E-01 | 1 |
| RPS6KL1  | 884998  | 232 | 41  | 1353512  | 425776  | 0 | 1  | 0  | 0 | 50 | 64 | 26283480 | 9.58E-01 | 1 |

|          |         |     |     |         |         |   |    |   |   |    |    |          |          |   |
|----------|---------|-----|-----|---------|---------|---|----|---|---|----|----|----------|----------|---|
| KIF2A    | 176808  | 575 | 33  | 1969036 | 503384  | 0 | 4  | 0 | 0 | 5  | 8  | 3110728  | 9.58E-01 | 1 |
| C14orf28 | 228479  | 577 | -32 | 810612  | 201852  | 0 | 1  | 0 | 0 | 50 | 99 | 24622028 | 9.58E-01 | 1 |
| GGT5     | 729749  | 200 | 28  | 1457820 | 473124  | 0 | 1  | 1 | 0 | 26 | 25 | 11596344 | 9.58E-01 | 1 |
| LIG4     | 71759   | 952 | -32 | 2318984 | 607336  | 0 | 8  | 1 | 0 | 10 | 23 | 5472788  | 9.58E-01 | 1 |
| MED19    | 923511  | 354 | 15  | 493060  | 146672  | 0 | 1  | 2 | 0 | 5  | 10 | 1552160  | 9.58E-01 | 1 |
| ATF4     | 721040  | 467 | 72  | 891068  | 247420  | 0 | 2  | 3 | 0 | 5  | 7  | 1638312  | 9.58E-01 | 1 |
| ZNF219   | 937278  | 320 | 20  | 1721260 | 612320  | 0 | 1  | 0 | 0 | 15 | 13 | 6796752  | 9.58E-01 | 1 |
| DMAP1    | 962892  | 211 | 29  | 1197584 | 351016  | 0 | 1  | 0 | 0 | 50 | 61 | 21094068 | 9.58E-01 | 1 |
| VAV2     | 674833  | 504 | 29  | 2355296 | 587044  | 0 | 5  | 3 | 0 | 50 | 66 | 21147468 | 9.58E-01 | 1 |
| PGK1     | 549810  | NaN | 14  | 1081172 | 300820  | 0 | 1  | 1 | 0 | 50 | 83 | 23441888 | 9.58E-01 | 1 |
| WDR53    | 1180405 | 156 | 30  | 899968  | 260948  | 0 | 1  | 1 | 0 | 50 | 69 | 20130020 | 9.58E-01 | 1 |
| CDCP2    | 465615  | 313 | 26  | 1110720 | 343896  | 0 | 2  | 4 | 0 | 19 | 27 | 6430784  | 9.58E-01 | 1 |
| ZNF584   | 2179183 | 270 | -4  | 1080104 | 284800  | 0 | 1  | 0 | 0 | 50 | 76 | 25634848 | 9.58E-01 | 1 |
| MICALL1  | 1370748 | 203 | 50  | 2174092 | 660380  | 0 | 6  | 5 | 0 | 3  | 6  | 1253476  | 9.58E-01 | 1 |
| SEC63    | 290010  | 481 | 37  | 2038812 | 484872  | 0 | 6  | 3 | 0 | 5  | 5  | 1460312  | 9.58E-01 | 1 |
| ZNF81    | 583623  | NaN | 19  | 1718412 | 415452  | 0 | 2  | 0 | 0 | 9  | 8  | 3648644  | 9.58E-01 | 1 |
| ACP2     | 1274054 | 198 | 38  | 1108940 | 325384  | 0 | 1  | 2 | 0 | 50 | 62 | 18403064 | 9.58E-01 | 1 |
| GABRR3   | 189744  | 702 | 0   | 1226420 | 306160  | 0 | 1  | 1 | 0 | 50 | 62 | 22807852 | 9.58E-01 | 1 |
| KIF19    | 362227  | 433 | -8  | 2515140 | 766824  | 0 | 6  | 1 | 0 | 2  | 5  | 1534716  | 9.58E-01 | 1 |
| SLC6A3   | 606209  | 490 | 30  | 1580996 | 468496  | 0 | 6  | 4 | 0 | 8  | 11 | 2509088  | 9.59E-01 | 1 |
| CXCL13   | 405364  | 627 | 10  | 293700  | 75828   | 0 | 2  | 1 | 0 | 1  | 2  | 254184   | 9.59E-01 | 1 |
| RAPGEF1  | 629872  | 355 | 32  | 2824148 | 798508  | 0 | 3  | 3 | 0 | 8  | 9  | 5362784  | 9.59E-01 | 1 |
| KDM5C    | 877207  | NaN | 80  | 4017104 | 1193668 | 0 | 4  | 2 | 0 | 13 | 12 | 6357804  | 9.59E-01 | 1 |
| ZBTB20   | 86308   | 644 | 10  | 1849776 | 540408  | 0 | 3  | 3 | 0 | 28 | 41 | 12932056 | 9.59E-01 | 1 |
| BMP6     | 830850  | 327 | 8   | 1294416 | 378072  | 0 | 3  | 3 | 0 | 19 | 32 | 7513024  | 9.59E-01 | 1 |
| PIGQ     | 1115707 | 213 | 39  | 1951948 | 595232  | 0 | 4  | 2 | 0 | 39 | 42 | 13074456 | 9.59E-01 | 1 |
| VRK2     | 198322  | 479 | 8   | 1394808 | 336420  | 0 | 1  | 0 | 0 | 38 | 48 | 16210816 | 9.59E-01 | 1 |
| BCORL1   | 389645  | NaN | 38  | 4357796 | 1420084 | 0 | 9  | 8 | 0 | 10 | 20 | 5184428  | 9.59E-01 | 1 |
| INSR     | 558979  | 505 | 21  | 3529028 | 991816  | 0 | 10 | 7 | 0 | 33 | 40 | 10272380 | 9.59E-01 | 1 |
| CA7      | 868790  | 142 | 24  | 687080  | 187612  | 0 | 1  | 2 | 0 | 3  | 6  | 1558924  | 9.59E-01 | 1 |
| NUPL1    | 331109  | 381 | 37  | 1522612 | 463868  | 0 | 2  | 2 | 0 | 50 | 68 | 21157436 | 9.59E-01 | 1 |
| GPC1     | 409918  | 407 | 20  | 1395164 | 430048  | 0 | 1  | 2 | 0 | 50 | 50 | 21954164 | 9.59E-01 | 1 |
| SRF      | 1308754 | 363 | 35  | 1239592 | 416876  | 0 | 2  | 0 | 0 | 12 | 24 | 6411204  | 9.59E-01 | 1 |

|          |         |      |     |          |         |   |    |    |   |    |     |          |          |   |
|----------|---------|------|-----|----------|---------|---|----|----|---|----|-----|----------|----------|---|
| FAM134C  | 1884163 | 177  | 38  | 1177292  | 356356  | 0 | 1  | 0  | 0 | 50 | 68  | 23826724 | 9.59E-01 | 1 |
| OBSCN    | 698626  | 316  | 9   | 20750884 | 6518360 | 0 | 52 | 13 | 0 | 0  | 13  | 6518360  | 9.59E-01 | 1 |
| ELF2     | 358887  | 261  | 30  | 1542904  | 454256  | 0 | 1  | 1  | 0 | 50 | 76  | 27327628 | 9.59E-01 | 1 |
| TMIGD2   | 2127558 | 220  | 33  | 718764   | 207192  | 0 | 1  | 0  | 0 | 1  | 2   | 881812   | 9.59E-01 | 1 |
| CHID1    | 1694280 | 232  | 52  | 1091852  | 306160  | 0 | 1  | 2  | 0 | 50 | 58  | 19804992 | 9.59E-01 | 1 |
| PPWD1    | 424356  | 444  | 25  | 1686728  | 431116  | 0 | 3  | 1  | 0 | 4  | 5   | 2019944  | 9.59E-01 | 1 |
| FBXL17   | 73947   | 913  | 4   | 1747604  | 535780  | 0 | 3  | 0  | 0 | 8  | 8   | 2851916  | 9.59E-01 | 1 |
| ZNF556   | 1287128 | 291  | 27  | 1175156  | 304024  | 0 | 4  | 3  | 0 | 4  | 7   | 1704884  | 9.59E-01 | 1 |
| FAH      | 201157  | 561  | 32  | 1106804  | 296548  | 0 | 2  | 3  | 0 | 5  | 12  | 2074056  | 9.59E-01 | 1 |
| EDEM3    | 370601  | 493  | 4   | 2443584  | 626916  | 0 | 5  | 1  | 0 | 2  | 2   | 1304384  | 9.59E-01 | 1 |
| RNF31    | 974559  | 220  | 41  | 2711296  | 814172  | 0 | 4  | 1  | 0 | 8  | 6   | 3001792  | 9.59E-01 | 1 |
| KPNA3    | 422339  | 296  | 51  | 1380212  | 360628  | 0 | 2  | 0  | 0 | 45 | 51  | 16335060 | 9.59E-01 | 1 |
| DMP1     | 500313  | 623  | -7  | 1358852  | 309364  | 0 | 2  | 0  | 0 | 15 | 24  | 7044884  | 9.59E-01 | 1 |
| AMPH     | 167080  | 639  | 7   | 1811684  | 505876  | 0 | 3  | 4  | 0 | 17 | 26  | 7410852  | 9.59E-01 | 1 |
| FGFR1    | 841062  | 381  | 47  | 2446076  | 700252  | 0 | 5  | 2  | 0 | 50 | 87  | 27457924 | 9.59E-01 | 1 |
| KCNT2    | 37679   | 1035 | -24 | 2990044  | 767180  | 0 | 8  | 4  | 0 | 50 | 116 | 28340804 | 9.59E-01 | 1 |
| ZNF462   | 259213  | 625  | -7  | 6370620  | 1713072 | 0 | 13 | 3  | 0 | 4  | 6   | 3854768  | 9.59E-01 | 1 |
| SSRP1    | 926574  | 191  | -11 | 1871848  | 467072  | 0 | 8  | 2  | 0 | 1  | 3   | 719832   | 9.60E-01 | 1 |
| SUPV3L1  | 732419  | 168  | 40  | 2029200  | 556428  | 0 | 3  | 2  | 0 | 25 | 28  | 10275584 | 9.60E-01 | 1 |
| TCEB3CL  | 120831  | 639  | 34  | 3960856  | 1292636 | 0 | 1  | 1  | 0 | 19 | 11  | 8108968  | 9.60E-01 | 1 |
| IARS     | 521598  | 409  | 42  | 3314004  | 873624  | 0 | 4  | 1  | 0 | 5  | 3   | 2087228  | 9.60E-01 | 1 |
| CDAN1    | 610808  | 453  | 26  | 3075128  | 974728  | 0 | 3  | 2  | 0 | 28 | 24  | 12713828 | 9.60E-01 | 1 |
| TH       | 837088  | 579  | 38  | 1338204  | 414384  | 0 | 1  | 1  | 0 | 50 | 46  | 19328664 | 9.60E-01 | 1 |
| OR6T1    | 107524  | 830  | -5  | 780352   | 256676  | 0 | 2  | 0  | 0 | 4  | 6   | 1246000  | 9.60E-01 | 1 |
| INPP5B   | 445083  | 232  | 38  | 2410832  | 615880  | 0 | 3  | 1  | 0 | 34 | 26  | 12915324 | 9.60E-01 | 1 |
| TUFM     | 1146511 | 221  | 56  | 1143472  | 356000  | 0 | 1  | 1  | 0 | 16 | 35  | 10080852 | 9.60E-01 | 1 |
| SLC7A11  | 141546  | 570  | -1  | 1273412  | 381988  | 0 | 1  | 0  | 0 | 50 | 55  | 21820308 | 9.60E-01 | 1 |
| C19orf57 | 842601  | 185  | 32  | 1573520  | 500536  | 0 | 2  | 2  | 0 | 50 | 79  | 23810704 | 9.60E-01 | 1 |
| SULT2B1  | 1590428 | 242  | 33  | 966540   | 261660  | 0 | 2  | 3  | 0 | 4  | 5   | 1298332  | 9.60E-01 | 1 |
| UGT2B28  | 21304   | 997  | -3  | 1367752  | 353864  | 0 | 3  | 1  | 0 | 50 | 73  | 18832756 | 9.60E-01 | 1 |
| EVPL     | 1611239 | 218  | 22  | 5071932  | 1534716 | 0 | 11 | 8  | 0 | 37 | 76  | 19948816 | 9.60E-01 | 1 |
| FRRS1    | 276548  | 540  | -5  | 1643296  | 427556  | 0 | 4  | 0  | 0 | 5  | 7   | 2201504  | 9.60E-01 | 1 |
| XPO1     | 842390  | 442  | 42  | 2847644  | 689572  | 0 | 5  | 4  | 0 | 50 | 46  | 17728800 | 9.60E-01 | 1 |

|          |         |     |     |         |         |   |    |   |   |    |     |          |          |   |
|----------|---------|-----|-----|---------|---------|---|----|---|---|----|-----|----------|----------|---|
| PLAGL1   | 358761  | 422 | 8   | 1144184 | 346744  | 0 | 1  | 0 | 0 | 50 | 56  | 20606704 | 9.60E-01 | 1 |
| SYDE2    | 367677  | 468 | 1   | 3011404 | 845144  | 0 | 3  | 1 | 0 | 29 | 40  | 14586388 | 9.60E-01 | 1 |
| NFIL3    | 150560  | 369 | 18  | 1158424 | 325028  | 0 | 1  | 2 | 0 | 50 | 53  | 18420508 | 9.60E-01 | 1 |
| DLEC1    | 310440  | 411 | 28  | 4682824 | 1305452 | 0 | 13 | 6 | 0 | 19 | 25  | 8834496  | 9.60E-01 | 1 |
| CACNA2D1 | 29637   | 816 | 12  | 2923116 | 735852  | 0 | 5  | 2 | 0 | 50 | 60  | 21954876 | 9.60E-01 | 1 |
| SERPINA1 | 201688  | 843 | 9   | 1061236 | 298328  | 0 | 1  | 1 | 0 | 50 | 70  | 22072712 | 9.60E-01 | 1 |
| RANBP10  | 1098330 | 136 | 50  | 1600220 | 445000  | 0 | 3  | 1 | 0 | 3  | 5   | 1787832  | 9.60E-01 | 1 |
| NPLOC4   | 3705166 | 205 | 21  | 1594880 | 424708  | 0 | 2  | 0 | 0 | 27 | 21  | 7365640  | 9.60E-01 | 1 |
| ARG2     | 481915  | 260 | 42  | 899612  | 267712  | 0 | 1  | 2 | 0 | 18 | 19  | 5599880  | 9.60E-01 | 1 |
| NACA     | 2637730 | 154 | 47  | 4833412 | 1866152 | 0 | 3  | 0 | 0 | 0  | 0   | 1866152  | 9.60E-01 | 1 |
| RAB14    | 611254  | 365 | 27  | 580992  | 140976  | 0 | 1  | 0 | 0 | 1  | 1   | 323960   | 9.60E-01 | 1 |
| XK       | 115395  | NaN | 11  | 1110720 | 325740  | 0 | 1  | 1 | 0 | 50 | 65  | 20429060 | 9.61E-01 | 1 |
| UNG      | 595266  | 487 | 20  | 890000  | 253828  | 0 | 1  | 2 | 0 | 50 | 72  | 19690360 | 9.61E-01 | 1 |
| ANXA8    | NaN     | NaN | NaN | 1766472 | 429336  | 0 | 2  | 0 | 0 | 50 | 116 | 40074920 | 9.61E-01 | 1 |
| KIAA1683 | 1178047 | 210 | 43  | 3291932 | 1106092 | 0 | 8  | 2 | 0 | 3  | 5   | 2142052  | 9.61E-01 | 1 |
| VCL      | 843223  | 125 | 52  | 2892856 | 835532  | 0 | 4  | 0 | 0 | 0  | 0   | 835532   | 9.61E-01 | 1 |
| TSPYL6   | 619188  | 448 | 9   | 1015668 | 301176  | 0 | 2  | 3 | 0 | 13 | 11  | 2655760  | 9.61E-01 | 1 |
| KLK12    | 490795  | 632 | 22  | 713424  | 171948  | 0 | 2  | 2 | 0 | 5  | 7   | 1231048  | 9.61E-01 | 1 |
| NRP2     | 278279  | 567 | 5   | 2646860 | 736564  | 0 | 4  | 3 | 0 | 50 | 70  | 23039252 | 9.61E-01 | 1 |
| PCDHGA1  | NaN     | NaN | NaN | 2349956 | 746176  | 0 | 5  | 0 | 0 | 7  | 14  | 4434336  | 9.61E-01 | 1 |
| SERPINA9 | 278548  | 858 | 13  | 1097904 | 316128  | 0 | 1  | 2 | 0 | 50 | 55  | 16626980 | 9.61E-01 | 1 |
| ZSCAN2   | 341520  | 263 | 32  | 1645788 | 420792  | 0 | 2  | 2 | 0 | 50 | 63  | 20933512 | 9.61E-01 | 1 |
| CBX8     | 633863  | 209 | 31  | 958352  | 310432  | 0 | 1  | 0 | 0 | 1  | 3   | 815952   | 9.61E-01 | 1 |
| CECR5    | 305072  | 574 | -55 | 1095412 | 337844  | 0 | 2  | 3 | 0 | 17 | 25  | 5876848  | 9.61E-01 | 1 |
| FAM65C   | 568493  | 153 | 55  | 2403712 | 720188  | 0 | 3  | 5 | 0 | 42 | 57  | 14421204 | 9.61E-01 | 1 |
| MYO9B    | 945446  | 330 | 36  | 5506608 | 1587048 | 0 | 17 | 5 | 0 | 1  | 5   | 1909228  | 9.61E-01 | 1 |
| MYO1C    | 1380844 | 220 | 18  | 2781072 | 783912  | 0 | 4  | 4 | 0 | 48 | 69  | 20951668 | 9.61E-01 | 1 |
| SDC2     | 230943  | 740 | -2  | 518336  | 145960  | 0 | 1  | 1 | 0 | 2  | 5   | 1089716  | 9.61E-01 | 1 |
| ZNF345   | 352375  | 976 | -36 | 1266648 | 304380  | 0 | 2  | 0 | 0 | 17 | 38  | 9834856  | 9.61E-01 | 1 |
| EXOC6    | 557904  | 421 | 36  | 2230340 | 536848  | 0 | 3  | 2 | 0 | 50 | 59  | 22205500 | 9.61E-01 | 1 |
| KLHL21   | 628180  | 259 | 38  | 1454616 | 476328  | 0 | 2  | 3 | 0 | 46 | 63  | 18237524 | 9.61E-01 | 1 |
| EFHB     | 103479  | 720 | -15 | 2149172 | 574228  | 0 | 8  | 3 | 0 | 13 | 28  | 6838404  | 9.61E-01 | 1 |
| PIGR     | 467960  | 385 | 26  | 1926316 | 567464  | 0 | 5  | 3 | 0 | 7  | 6   | 1940912  | 9.61E-01 | 1 |

|          |         |      |     |         |         |   |    |   |   |    |    |          |          |   |
|----------|---------|------|-----|---------|---------|---|----|---|---|----|----|----------|----------|---|
| MAST3    | 1249693 | 226  | 42  | 3269860 | 1038452 | 0 | 5  | 1 | 0 | 2  | 3  | 1790680  | 9.61E-01 | 1 |
| SLC38A9  | 340223  | 390  | 24  | 1477756 | 382700  | 0 | 2  | 2 | 0 | 2  | 4  | 1807412  | 9.61E-01 | 1 |
| CDKL3    | 910029  | 148  | 49  | 1569960 | 383412  | 0 | 2  | 0 | 0 | 6  | 12 | 2883600  | 9.61E-01 | 1 |
| FLNB     | 760236  | 182  | 43  | 6701344 | 1934504 | 0 | 21 | 9 | 0 | 9  | 25 | 5997532  | 9.61E-01 | 1 |
| HSPA4    | 637803  | 223  | 39  | 2219304 | 552156  | 0 | 2  | 1 | 0 | 24 | 26 | 12535116 | 9.61E-01 | 1 |
| SHISA3   | 197282  | 646  | 24  | 583128  | 186900  | 0 | 1  | 2 | 0 | 2  | 4  | 849060   | 9.61E-01 | 1 |
| TRIM36   | 219228  | 619  | -1  | 2106452 | 532576  | 0 | 6  | 1 | 0 | 3  | 3  | 1274124  | 9.61E-01 | 1 |
| MAML1    | 1617173 | 256  | 41  | 2504816 | 770740  | 0 | 3  | 1 | 0 | 50 | 55 | 22803224 | 9.61E-01 | 1 |
| PROM1    | 174831  | 435  | 37  | 2280536 | 605200  | 0 | 3  | 1 | 0 | 50 | 67 | 21898984 | 9.61E-01 | 1 |
| ABCA6    | 240031  | 493  | -39 | 4263100 | 1083308 | 0 | 14 | 1 | 0 | 3  | 5  | 1859388  | 9.61E-01 | 1 |
| OR4C15   | 1141    | 1100 | -37 | 923820  | 262728  | 0 | 6  | 3 | 0 | 8  | 19 | 2180856  | 9.61E-01 | 1 |
| C1orf101 | 716278  | 590  | 1   | 2497340 | 644716  | 0 | 3  | 1 | 0 | 5  | 2  | 2069428  | 9.61E-01 | 1 |
| FAM98B   | 97405   | 643  | -15 | 1186548 | 338556  | 0 | 1  | 0 | 0 | 50 | 68 | 24653356 | 9.61E-01 | 1 |
| TPM3     | 2028928 | 185  | 35  | 1093632 | 268068  | 0 | 1  | 2 | 0 | 6  | 17 | 3124968  | 9.61E-01 | 1 |
| SIPA1L1  | 161803  | 523  | 34  | 4573532 | 1295128 | 0 | 9  | 3 | 0 | 26 | 33 | 10537244 | 9.61E-01 | 1 |
| CASS4    | 254881  | 551  | -25 | 1959068 | 583840  | 0 | 2  | 3 | 0 | 4  | 10 | 3284456  | 9.62E-01 | 1 |
| INTS3    | 1687837 | 175  | 33  | 2735860 | 729800  | 0 | 6  | 4 | 0 | 44 | 72 | 16821000 | 9.62E-01 | 1 |
| RAD54B   | 544647  | 412  | 23  | 2369536 | 609116  | 0 | 2  | 1 | 0 | 46 | 45 | 21814968 | 9.62E-01 | 1 |
| PTPRT    | 17956   | 1018 | -72 | 3756512 | 1056964 | 0 | 16 | 7 | 0 | 20 | 25 | 3997168  | 9.62E-01 | 1 |
| 33GALNT2 | 536528  | 350  | 16  | 1300112 | 352084  | 0 | 2  | 1 | 0 | 50 | 78 | 20983352 | 9.62E-01 | 1 |
| GSN      | 579825  | 326  | 42  | 2022436 | 593096  | 0 | 1  | 1 | 0 | 23 | 20 | 10843760 | 9.62E-01 | 1 |
| RARRES3  | 854193  | 303  | 56  | 425776  | 117836  | 0 | 1  | 2 | 0 | 8  | 9  | 1189396  | 9.62E-01 | 1 |
| OR6C3    | 667726  | 802  | -14 | 772520  | 226060  | 0 | 1  | 1 | 0 | 50 | 83 | 19448636 | 9.62E-01 | 1 |
| BCAM     | 920101  | 196  | -3  | 1580640 | 498756  | 0 | 2  | 0 | 0 | 4  | 3  | 1628344  | 9.62E-01 | 1 |
| IRF8     | 407770  | 461  | 27  | 1098972 | 302244  | 0 | 1  | 1 | 0 | 6  | 7  | 2876480  | 9.62E-01 | 1 |
| PKD2L2   | 946917  | 396  | 47  | 1655044 | 396584  | 0 | 2  | 0 | 0 | 50 | 72 | 24090520 | 9.62E-01 | 1 |
| SLC1A2   | 643540  | 263  | 15  | 1453192 | 431828  | 0 | 3  | 0 | 0 | 0  | 0  | 431828   | 9.62E-01 | 1 |
| LNPEP    | 393651  | 469  | 46  | 2657184 | 702744  | 0 | 4  | 2 | 0 | 50 | 63 | 23913232 | 9.62E-01 | 1 |
| PGM3     | 152280  | 734  | 8   | 1411540 | 379496  | 0 | 2  | 1 | 0 | 50 | 89 | 26599608 | 9.62E-01 | 1 |
| PRAMEF14 | NaN     | NaN  | NaN | 2407984 | 687080  | 0 | 4  | 5 | 0 | 26 | 45 | 12264200 | 9.62E-01 | 1 |
| RAB36    | 261227  | 555  | 48  | 870776  | 244216  | 0 | 2  | 1 | 0 | 2  | 2  | 731224   | 9.62E-01 | 1 |
| GCDH     | 1886809 | 335  | 40  | 1183344 | 344964  | 0 | 3  | 3 | 0 | 22 | 36 | 7729472  | 9.62E-01 | 1 |
| RIOK1    | 789838  | 250  | 17  | 1538988 | 352440  | 0 | 2  | 1 | 0 | 50 | 56 | 22022516 | 9.62E-01 | 1 |

|         |         |      |     |         |         |   |   |   |   |    |    |          |          |   |
|---------|---------|------|-----|---------|---------|---|---|---|---|----|----|----------|----------|---|
| MEX3D   | 2122824 | 221  | 35  | 1574588 | 583840  | 0 | 1 | 0 | 0 | 12 | 9  | 4358508  | 9.62E-01 | 1 |
| APEX2   | 245504  | NaN  | 8   | 1300468 | 385904  | 0 | 2 | 3 | 0 | 13 | 18 | 4812408  | 9.62E-01 | 1 |
| IGLL5   | 223193  | 631  | 29  | 529372  | 168032  | 0 | 1 | 2 | 0 | 9  | 16 | 2050204  | 9.62E-01 | 1 |
| RANBP17 | 214548  | 691  | 12  | 2861528 | 745108  | 0 | 6 | 7 | 0 | 28 | 39 | 9869744  | 9.62E-01 | 1 |
| CMPK2   | 41287   | 1132 | -4  | 1095412 | 363476  | 0 | 1 | 1 | 0 | 50 | 72 | 22675776 | 9.62E-01 | 1 |
| CLCN7   | 1232935 | 209  | 37  | 2057324 | 627628  | 0 | 1 | 3 | 0 | 50 | 50 | 16330788 | 9.62E-01 | 1 |
| PCDHAC1 | 931701  | 643  | -10 | 2369892 | 755076  | 0 | 8 | 1 | 0 | 0  | 1  | 755076   | 9.62E-01 | 1 |
| BTN2A2  | 378286  | 330  | 51  | 1328948 | 379852  | 0 | 4 | 0 | 0 | 0  | 0  | 379852   | 9.62E-01 | 1 |
| ZNF559  | 401242  | 705  | -65 | 1399436 | 344608  | 0 | 3 | 0 | 0 | 8  | 13 | 3433976  | 9.62E-01 | 1 |
| ETNK1   | 206703  | 644  | 2   | 1237812 | 348168  | 0 | 3 | 2 | 0 | 5  | 7  | 1848352  | 9.62E-01 | 1 |
| CXorf57 | 148900  | NaN  | 12  | 2209336 | 588824  | 0 | 5 | 2 | 0 | 7  | 7  | 2713076  | 9.62E-01 | 1 |
| GPR176  | 731008  | 387  | 17  | 1269496 | 392312  | 0 | 1 | 2 | 0 | 32 | 44 | 15443636 | 9.63E-01 | 1 |
| SLIT3   | 401911  | 706  | 20  | 3942700 | 1089716 | 0 | 9 | 4 | 0 | 6  | 7  | 3194744  | 9.63E-01 | 1 |
| ZNF76   | 682809  | 264  | 39  | 1469924 | 415096  | 0 | 3 | 3 | 0 | 27 | 46 | 11443620 | 9.63E-01 | 1 |
| GCC1    | 411207  | 619  | -7  | 1926316 | 564260  | 0 | 4 | 1 | 0 | 12 | 10 | 3643304  | 9.63E-01 | 1 |
| ISM2    | 504548  | 359  | 47  | 1487368 | 373088  | 0 | 2 | 2 | 0 | 35 | 45 | 14248544 | 9.63E-01 | 1 |
| APOL5   | 1161568 | 376  | -43 | 1084732 | 322892  | 0 | 3 | 1 | 0 | 7  | 14 | 3048072  | 9.63E-01 | 1 |
| HJURP   | 301500  | 439  | 13  | 1902108 | 534000  | 0 | 3 | 0 | 0 | 17 | 16 | 5323268  | 9.63E-01 | 1 |
| MPP2    | 1025836 | 241  | 19  | 1403708 | 419368  | 0 | 4 | 3 | 0 | 9  | 14 | 3060176  | 9.63E-01 | 1 |
| CPVL    | 112083  | 634  | 7   | 1259884 | 319688  | 0 | 2 | 2 | 0 | 7  | 8  | 2541128  | 9.63E-01 | 1 |
| CDH9    | 39282   | 1140 | -26 | 2044152 | 534000  | 0 | 8 | 3 | 0 | 23 | 48 | 8829512  | 9.63E-01 | 1 |
| MUM1L1  | 48678   | NaN  | -10 | 1767896 | 465292  | 0 | 2 | 0 | 0 | 41 | 76 | 24383152 | 9.63E-01 | 1 |
| TRPM5   | 833749  | 589  | 47  | 2942696 | 893560  | 0 | 3 | 4 | 0 | 50 | 48 | 23387064 | 9.63E-01 | 1 |
| LAMC2   | 764899  | 413  | 19  | 3095776 | 830192  | 0 | 7 | 3 | 0 | 50 | 81 | 24834916 | 9.63E-01 | 1 |
| STXBP5  | 94997   | 696  | -5  | 2992892 | 813460  | 0 | 4 | 4 | 0 | 24 | 29 | 9729836  | 9.63E-01 | 1 |
| EPC2    | 91724   | 642  | 7   | 2097552 | 548952  | 0 | 4 | 0 | 0 | 2  | 3  | 1221792  | 9.63E-01 | 1 |
| FOXN4   | 438714  | 519  | 35  | 1299400 | 398720  | 0 | 1 | 0 | 0 | 50 | 52 | 19818520 | 9.63E-01 | 1 |
| KRT37   | 1321356 | 424  | -6  | 1144540 | 325028  | 0 | 1 | 0 | 0 | 18 | 19 | 6810636  | 9.63E-01 | 1 |
| PLXNA1  | 422395  | 494  | 48  | 4750464 | 1455684 | 0 | 7 | 6 | 0 | 50 | 51 | 20682532 | 9.63E-01 | 1 |
| ZNF417  | 1252385 | 750  | -19 | 1479536 | 374512  | 0 | 3 | 0 | 0 | 23 | 60 | 10985804 | 9.63E-01 | 1 |
| MAPKAPK | 583785  | 302  | 50  | 1001072 | 268780  | 0 | 2 | 3 | 0 | 2  | 3  | 744752   | 9.63E-01 | 1 |
| PRKACA  | 1034381 | 321  | 36  | 954436  | 239588  | 0 | 1 | 3 | 0 | 5  | 11 | 1929164  | 9.63E-01 | 1 |
| PRKACG  | 168122  | 498  | 36  | 882168  | 247776  | 0 | 2 | 0 | 0 | 6  | 14 | 2839456  | 9.63E-01 | 1 |

|         |         |      |     |          |         |   |    |    |   |    |     |          |          |   |
|---------|---------|------|-----|----------|---------|---|----|----|---|----|-----|----------|----------|---|
| KLHL3   | 406828  | 409  | 26  | 1534360  | 409400  | 0 | 1  | 0  | 0 | 15 | 14  | 6957308  | 9.63E-01 | 1 |
| FBXL12  | 1069900 | 579  | -26 | 788184   | 268068  | 0 | 1  | 0  | 0 | 50 | 87  | 20502040 | 9.63E-01 | 1 |
| DGKQ    | 675007  | 256  | 45  | 2366332  | 751160  | 0 | 2  | 2  | 0 | 36 | 37  | 16261012 | 9.63E-01 | 1 |
| FRMPD4  | 191024  | NaN  | 22  | 3351028  | 956216  | 0 | 6  | 3  | 0 | 50 | 148 | 45674800 | 9.63E-01 | 1 |
| KRT12   | 1036346 | 358  | 5   | 1245644  | 372376  | 0 | 2  | 1  | 0 | 38 | 46  | 10303352 | 9.63E-01 | 1 |
| NOTUM   | 3814891 | 211  | 28  | 1267004  | 368104  | 0 | 2  | 3  | 0 | 14 | 15  | 3835188  | 9.63E-01 | 1 |
| ZNF708  | 170282  | 1121 | -57 | 1468856  | 351016  | 0 | 2  | 1  | 0 | 40 | 51  | 14856948 | 9.63E-01 | 1 |
| ARSE    | 191640  | NaN  | 18  | 1502320  | 430760  | 0 | 2  | 2  | 0 | 50 | 72  | 20725252 | 9.63E-01 | 1 |
| ZNF239  | 310244  | 585  | -36 | 1186192  | 288716  | 0 | 2  | 0  | 0 | 50 | 86  | 20571104 | 9.63E-01 | 1 |
| VIL1    | 739473  | 144  | 37  | 2148460  | 585620  | 0 | 2  | 3  | 0 | 50 | 47  | 20845580 | 9.64E-01 | 1 |
| SORBS2  | 157889  | 374  | -1  | 3760072  | 1038452 | 0 | 4  | 3  | 0 | 47 | 50  | 24365708 | 9.64E-01 | 1 |
| TBC1D12 | 231059  | 361  | 22  | 1966900  | 570668  | 0 | 3  | 0  | 0 | 10 | 16  | 5819532  | 9.64E-01 | 1 |
| STIP1   | 1602391 | 278  | 57  | 1446428  | 352084  | 0 | 4  | 4  | 0 | 9  | 21  | 4572108  | 9.64E-01 | 1 |
| LSM10   | 636943  | 212  | 28  | 307940   | 93628   | 0 | 1  | 1  | 0 | 1  | 3   | 412604   | 9.64E-01 | 1 |
| CD44    | 685695  | 222  | 28  | 1990040  | 463156  | 0 | 2  | 1  | 0 | 43 | 46  | 17262440 | 9.64E-01 | 1 |
| PRRG3   | 125659  | NaN  | 4   | 581704   | 174440  | 0 | 1  | 2  | 0 | 9  | 14  | 2346396  | 9.64E-01 | 1 |
| DUOX2   | 695711  | 544  | 23  | 3954804  | 1149168 | 0 | 8  | 7  | 0 | 10 | 24  | 6997892  | 9.64E-01 | 1 |
| THOC2   | 333292  | NaN  | 4   | 4250640  | 1021008 | 0 | 8  | 4  | 0 | 50 | 58  | 18547600 | 9.64E-01 | 1 |
| AHNAK2  | 854493  | 205  | 30  | 14201196 | 4394820 | 0 | 45 | 20 | 0 | 39 | 74  | 21382784 | 9.64E-01 | 1 |
| SFXN1   | 184629  | 674  | 15  | 848704   | 228908  | 0 | 1  | 0  | 0 | 50 | 65  | 17130720 | 9.64E-01 | 1 |
| SMAD6   | 580112  | 197  | 46  | 1222504  | 421148  | 0 | 2  | 3  | 0 | 25 | 37  | 9194056  | 9.64E-01 | 1 |
| SCML2   | 82842   | NaN  | 17  | 1816312  | 489500  | 0 | 2  | 3  | 0 | 23 | 21  | 8206868  | 9.64E-01 | 1 |
| SACS    | 180800  | 625  | 14  | 11584240 | 3124256 | 0 | 33 | 12 | 0 | 22 | 31  | 10585304 | 9.64E-01 | 1 |
| HIF3A   | 1079866 | 357  | 39  | 1705596  | 528660  | 0 | 6  | 4  | 0 | 7  | 13  | 2821656  | 9.64E-01 | 1 |
| ANKRD50 | 47412   | 616  | -24 | 3563916  | 1030620 | 0 | 10 | 1  | 0 | 14 | 17  | 5839468  | 9.64E-01 | 1 |
| STX1A   | 1082063 | 214  | 54  | 794592   | 171948  | 0 | 1  | 2  | 0 | 8  | 23  | 5638684  | 9.64E-01 | 1 |
| FHL1    | 248739  | NaN  | 23  | 1031332  | 231044  | 0 | 1  | 1  | 0 | 14 | 16  | 5405860  | 9.64E-01 | 1 |
| KCNQ5   | 648013  | 975  | 15  | 2401932  | 708084  | 0 | 11 | 4  | 0 | 3  | 7   | 1721972  | 9.64E-01 | 1 |
| CCDC13  | 369284  | 309  | 33  | 1839808  | 518336  | 0 | 3  | 3  | 0 | 7  | 10  | 3747968  | 9.64E-01 | 1 |
| TMEM201 | 491496  | 268  | 31  | 1653264  | 546816  | 0 | 2  | 1  | 0 | 50 | 61  | 19818876 | 9.64E-01 | 1 |
| ALDH3B2 | 1408104 | 424  | 60  | 989324   | 281596  | 0 | 1  | 1  | 0 | 50 | 64  | 18269920 | 9.64E-01 | 1 |
| LRP5    | 830388  | 241  | 53  | 4079048  | 1194736 | 0 | 8  | 6  | 0 | 50 | 71  | 20784704 | 9.64E-01 | 1 |
| ASB18   | 121194  | 481  | 8   | 1142760  | 373800  | 0 | 1  | 1  | 0 | 22 | 32  | 9982952  | 9.64E-01 | 1 |

|          |         |      |     |         |         |   |    |   |   |    |    |          |          |   |
|----------|---------|------|-----|---------|---------|---|----|---|---|----|----|----------|----------|---|
| ZPLD1    | 68082   | 621  | -10 | 1122468 | 306516  | 0 | 1  | 1 | 0 | 48 | 64 | 22241812 | 9.64E-01 | 1 |
| KLHL4    | 34243   | NaN  | -31 | 1902464 | 516556  | 0 | 4  | 4 | 0 | 11 | 12 | 3516568  | 9.64E-01 | 1 |
| ZNF480   | 526380  | 960  | -32 | 1392672 | 341760  | 0 | 3  | 0 | 0 | 8  | 12 | 3141700  | 9.64E-01 | 1 |
| WRN      | 283981  | 708  | 2   | 3802792 | 933788  | 0 | 6  | 4 | 0 | 27 | 44 | 14510204 | 9.64E-01 | 1 |
| IL12RB1  | 1291557 | 226  | 34  | 1809904 | 522608  | 0 | 3  | 4 | 0 | 50 | 74 | 18619868 | 9.64E-01 | 1 |
| CDC42EP4 | 193467  | 212  | -15 | 864368  | 279460  | 0 | 1  | 3 | 0 | 2  | 6  | 1091140  | 9.64E-01 | 1 |
| DMBX1    | 592811  | 255  | 23  | 942332  | 299752  | 0 | 6  | 3 | 0 | 1  | 6  | 872200   | 9.64E-01 | 1 |
| ZCCHC12  | 234959  | NaN  | 44  | 1000004 | 291208  | 0 | 1  | 2 | 0 | 32 | 52 | 15643708 | 9.64E-01 | 1 |
| LARP1B   | 232013  | 314  | 13  | 2512292 | 635104  | 0 | 3  | 1 | 0 | 4  | 2  | 1724464  | 9.64E-01 | 1 |
| INPPL1   | 744547  | 182  | 58  | 3178724 | 970456  | 0 | 10 | 8 | 0 | 20 | 31 | 7048800  | 9.65E-01 | 1 |
| TRNT1    | 59117   | 1039 | -15 | 1137064 | 286580  | 0 | 1  | 1 | 0 | 50 | 60 | 20398800 | 9.65E-01 | 1 |
| RGMB     | 141802  | 729  | 11  | 1190464 | 361340  | 0 | 1  | 1 | 0 | 50 | 76 | 24974824 | 9.65E-01 | 1 |
| SYNGAP1  | 1419781 | 236  | 31  | 3356368 | 1026704 | 0 | 4  | 4 | 0 | 39 | 58 | 15951292 | 9.65E-01 | 1 |
| CASP10   | 590374  | 386  | 39  | 1470280 | 407264  | 0 | 1  | 1 | 0 | 50 | 64 | 21368544 | 9.65E-01 | 1 |
| ZC3H12D  | 434842  | 139  | 40  | 1289076 | 423996  | 0 | 1  | 2 | 0 | 50 | 51 | 19481744 | 9.65E-01 | 1 |
| SORBS3   | 757216  | 224  | 45  | 1733008 | 505520  | 0 | 1  | 1 | 0 | 48 | 49 | 21352880 | 9.65E-01 | 1 |
| ZNF649   | 444002  | 817  | -53 | 1307944 | 326096  | 0 | 3  | 2 | 0 | 50 | 71 | 16382052 | 9.65E-01 | 1 |
| IEPACAM  | 311972  | 785  | 12  | 1233896 | 336064  | 0 | 1  | 1 | 0 | 50 | 63 | 22339000 | 9.65E-01 | 1 |
| NLE1     | 516190  | 504  | 23  | 1244932 | 365612  | 0 | 1  | 2 | 0 | 43 | 54 | 16171300 | 9.65E-01 | 1 |
| CLN8     | 100540  | 544  | -13 | 713780  | 210040  | 0 | 1  | 2 | 0 | 4  | 8  | 2027064  | 9.65E-01 | 1 |
| CACNA1D  | 514645  | 578  | 42  | 5781084 | 1530444 | 0 | 12 | 6 | 0 | 50 | 71 | 20599584 | 9.65E-01 | 1 |
| CLP1     | 923511  | 354  | 15  | 1044860 | 328588  | 0 | 1  | 1 | 0 | 50 | 73 | 18938488 | 9.65E-01 | 1 |
| PBXIP1   | 1612870 | 224  | 35  | 1847640 | 540408  | 0 | 3  | 0 | 0 | 0  | 0  | 540408   | 9.65E-01 | 1 |
| TBC1D3B  | 739634  | 565  | 19  | 1420440 | 396228  | 0 | 3  | 0 | 0 | 3  | 3  | 1177292  | 9.65E-01 | 1 |
| KDM5D    | 0       | 0    | 0   | 4017104 | 1131724 | 0 | 4  | 0 | 0 | 0  | 0  | 1131724  | 9.65E-01 | 1 |
| PILRA    | 1430637 | 204  | 54  | 779996  | 219652  | 0 | 4  | 0 | 0 | 0  | 0  | 219652   | 9.65E-01 | 1 |
| EIF2S2   | 898361  | 357  | 55  | 898188  | 206124  | 0 | 1  | 1 | 0 | 50 | 63 | 16230752 | 9.65E-01 | 1 |
| MRPL43   | 1020226 | 247  | 40  | 1092208 | 274832  | 0 | 1  | 0 | 0 | 50 | 62 | 20159924 | 9.65E-01 | 1 |
| ZNF346   | 1195948 | 218  | 40  | 778928  | 194020  | 0 | 2  | 2 | 0 | 5  | 16 | 2615176  | 9.65E-01 | 1 |
| AMDHD2   | 2085452 | 321  | 49  | 1617308 | 481312  | 0 | 3  | 2 | 0 | 50 | 76 | 21050280 | 9.65E-01 | 1 |
| SH3TC2   | 350600  | 254  | 15  | 3245296 | 953012  | 0 | 2  | 2 | 0 | 32 | 30 | 13753704 | 9.65E-01 | 1 |
| ZNF433   | 975609  | 728  | -8  | 1743332 | 428980  | 0 | 7  | 0 | 0 | 6  | 25 | 3938072  | 9.65E-01 | 1 |
| ZNF549   | 459366  | 828  | -31 | 1619444 | 401212  | 0 | 3  | 1 | 0 | 50 | 62 | 16455032 | 9.65E-01 | 1 |



|           |         |      |     |          |         |   |    |   |   |    |     |          |          |   |
|-----------|---------|------|-----|----------|---------|---|----|---|---|----|-----|----------|----------|---|
| EEF1A2    | 1262904 | 298  | 54  | 1174088  | 342472  | 0 | 2  | 3 | 0 | 21 | 30  | 7391984  | 9.65E-01 | 1 |
| DMRTC2    | 1360684 | 454  | 23  | 914564   | 298684  | 0 | 1  | 1 | 0 | 50 | 69  | 18698900 | 9.65E-01 | 1 |
| CPXM2     | 147419  | 771  | 10  | 1942336  | 538628  | 0 | 2  | 1 | 0 | 39 | 46  | 15577492 | 9.65E-01 | 1 |
| BCL11A    | 151287  | 732  | 7   | 2201504  | 600928  | 0 | 5  | 4 | 0 | 14 | 25  | 7135664  | 9.65E-01 | 1 |
| MAGEC2    | 16386   | NaN  | -29 | 932720   | 269848  | 0 | 4  | 3 | 0 | 6  | 24  | 2913148  | 9.65E-01 | 1 |
| MYCBP2    | 236609  | 713  | 59  | 12051312 | 3290508 | 0 | 31 | 9 | 0 | 25 | 34  | 11592072 | 9.65E-01 | 1 |
| PCDHGA6   | NaN     | NaN  | NaN | 2285876  | 747244  | 0 | 6  | 7 | 0 | 22 | 43  | 10322220 | 9.65E-01 | 1 |
| GPSM2     | 817825  | 236  | 19  | 1783916  | 466360  | 0 | 5  | 0 | 0 | 3  | 7   | 1527240  | 9.65E-01 | 1 |
| MAGEL2    | 94496   | 904  | -55 | 2977584  | 1027416 | 0 | 5  | 3 | 0 | 24 | 28  | 8834852  | 9.65E-01 | 1 |
| GLDC      | 213479  | 411  | 26  | 2648996  | 724816  | 0 | 7  | 5 | 0 | 7  | 10  | 2561420  | 9.65E-01 | 1 |
| ADAM19    | 261911  | 1079 | 45  | 2378080  | 662516  | 0 | 4  | 5 | 0 | 50 | 48  | 16798572 | 9.65E-01 | 1 |
| ZDHHC17   | 181943  | 605  | -12 | 1683168  | 413316  | 0 | 1  | 0 | 0 | 30 | 26  | 13086204 | 9.65E-01 | 1 |
| PCDHA8    | 896676  | 606  | -12 | 2353516  | 758636  | 0 | 9  | 6 | 0 | 43 | 105 | 19890076 | 9.65E-01 | 1 |
| SERGEF    | 645462  | 595  | 17  | 1186192  | 331436  | 0 | 1  | 0 | 0 | 14 | 18  | 6596324  | 9.65E-01 | 1 |
| DDX51     | 608356  | 528  | 26  | 1662876  | 536136  | 0 | 2  | 1 | 0 | 50 | 70  | 22588912 | 9.65E-01 | 1 |
| FAM71F2   | 875359  | 304  | 30  | 783200   | 229264  | 0 | 2  | 3 | 0 | 4  | 9   | 1731584  | 9.66E-01 | 1 |
| DOK6      | 50550   | 968  | -4  | 877540   | 216092  | 0 | 1  | 2 | 0 | 50 | 84  | 18756928 | 9.66E-01 | 1 |
| COX11     | 131464  | 869  | -43 | 766824   | 210396  | 0 | 1  | 2 | 0 | 9  | 11  | 2264872  | 9.66E-01 | 1 |
| IKBIP     | 488021  | 461  | 18  | 1610188  | 419012  | 0 | 5  | 0 | 0 | 5  | 5   | 1487012  | 9.66E-01 | 1 |
| PARP6     | 1129780 | 260  | 47  | 1671776  | 439660  | 0 | 2  | 3 | 0 | 43 | 62  | 21156368 | 9.66E-01 | 1 |
| RPS6KB2   | 1331051 | 161  | 52  | 1243152  | 366324  | 0 | 1  | 3 | 0 | 24 | 23  | 8804948  | 9.66E-01 | 1 |
| RNF6      | 96737   | 562  | 25  | 1718056  | 492704  | 0 | 3  | 1 | 0 | 1  | 1   | 897120   | 9.66E-01 | 1 |
| PRKG1     | 75025   | 995  | -15 | 2037388  | 522608  | 0 | 6  | 0 | 0 | 0  | 0   | 522608   | 9.66E-01 | 1 |
| ADCY5     | 372027  | 458  | 42  | 3179080  | 951944  | 0 | 10 | 7 | 0 | 6  | 15  | 4100052  | 9.66E-01 | 1 |
| SNAPC2    | 952640  | 320  | 27  | 804916   | 287648  | 0 | 1  | 2 | 0 | 18 | 34  | 7729828  | 9.66E-01 | 1 |
| GNPDA2    | 62624   | 1009 | 11  | 735496   | 177644  | 0 | 2  | 2 | 0 | 1  | 3   | 733004   | 9.66E-01 | 1 |
| MSN       | 325257  | NaN  | 47  | 1524392  | 378784  | 0 | 1  | 1 | 0 | 50 | 61  | 21526252 | 9.66E-01 | 1 |
| MOV10L1   | 934225  | 242  | 31  | 3212188  | 855824  | 0 | 8  | 2 | 0 | 3  | 10  | 2241376  | 9.66E-01 | 1 |
| PRR5L     | 196876  | 169  | -1  | 941976   | 274476  | 0 | 1  | 2 | 0 | 6  | 6   | 1972952  | 9.66E-01 | 1 |
| HIST2H2AI | 798975  | 560  | 17  | 312924   | 108936  | 0 | 2  | 2 | 0 | 3  | 5   | 431116   | 9.66E-01 | 1 |
| OSBPL11   | 269912  | 188  | 31  | 1936284  | 511572  | 0 | 4  | 0 | 0 | 1  | 1   | 745820   | 9.66E-01 | 1 |
| CATSPER3  | 725156  | 226  | 27  | 1046640  | 265932  | 0 | 2  | 3 | 0 | 7  | 8   | 2101112  | 9.66E-01 | 1 |
| PCDHB5    | 915569  | 724  | -11 | 1918840  | 631544  | 0 | 15 | 6 | 0 | 1  | 12  | 1262376  | 9.66E-01 | 1 |

|          |         |     |     |         |         |   |    |   |   |    |     |          |          |   |
|----------|---------|-----|-----|---------|---------|---|----|---|---|----|-----|----------|----------|---|
| XPR1     | 378102  | 589 | 11  | 1808480 | 484516  | 0 | 6  | 5 | 0 | 7  | 15  | 3090436  | 9.66E-01 | 1 |
| GPATCH4  | 2049505 | 180 | 37  | 1013176 | 242792  | 0 | 1  | 0 | 0 | 50 | 64  | 19075904 | 9.66E-01 | 1 |
| OSBPL6   | 150530  | 526 | 16  | 2556792 | 661092  | 0 | 5  | 1 | 0 | 1  | 1   | 901748   | 9.66E-01 | 1 |
| GOLGA6C  | NaN     | NaN | NaN | 1828772 | 469564  | 0 | 2  | 0 | 0 | 50 | 116 | 40115148 | 9.66E-01 | 1 |
| CNP      | 2081077 | 206 | 23  | 1047708 | 317196  | 0 | 1  | 0 | 0 | 3  | 5   | 1159492  | 9.66E-01 | 1 |
| PYROXD1  | 500770  | 836 | -29 | 1319336 | 332860  | 0 | 2  | 1 | 0 | 50 | 63  | 17056316 | 9.66E-01 | 1 |
| MYOC     | 411007  | 718 | 10  | 1264156 | 364544  | 0 | 5  | 4 | 0 | 2  | 10  | 1381280  | 9.66E-01 | 1 |
| CFI      | 212346  | 417 | 26  | 1550380 | 372020  | 0 | 3  | 1 | 0 | 12 | 12  | 3963348  | 9.66E-01 | 1 |
| PUSL1    | 1744013 | 273 | 28  | 757212  | 248844  | 0 | 1  | 2 | 0 | 17 | 31  | 7122136  | 9.66E-01 | 1 |
| TP53BP1  | 794398  | 368 | 43  | 5048792 | 1404064 | 0 | 20 | 4 | 0 | 1  | 6   | 1762200  | 9.66E-01 | 1 |
| POMT2    | 554839  | 418 | 37  | 1927028 | 564616  | 0 | 2  | 0 | 0 | 7  | 7   | 3455692  | 9.66E-01 | 1 |
| ZNF184   | 162358  | 606 | 37  | 1954796 | 471700  | 0 | 6  | 3 | 0 | 16 | 20  | 4747972  | 9.67E-01 | 1 |
| DGCR2    | 474521  | 277 | 16  | 1405844 | 398008  | 0 | 1  | 0 | 0 | 35 | 30  | 12357116 | 9.67E-01 | 1 |
| TWF2     | 1114737 | 181 | 52  | 903528  | 252048  | 0 | 1  | 2 | 0 | 13 | 22  | 5456056  | 9.67E-01 | 1 |
| SLC9A9   | 209532  | 954 | 7   | 1685304 | 448560  | 0 | 1  | 1 | 0 | 39 | 34  | 17260304 | 9.67E-01 | 1 |
| STON2    | 203328  | 364 | -1  | 2273060 | 644716  | 0 | 2  | 1 | 0 | 50 | 59  | 28536604 | 9.67E-01 | 1 |
| PTPRE    | 424354  | 683 | -15 | 1889292 | 479532  | 0 | 3  | 1 | 0 | 48 | 45  | 15284504 | 9.67E-01 | 1 |
| SERPINA7 | 23303   | NaN | 21  | 1058744 | 291208  | 0 | 1  | 2 | 0 | 50 | 64  | 19839524 | 9.67E-01 | 1 |
| TOX      | 192821  | 695 | 19  | 1351020 | 371664  | 0 | 6  | 4 | 0 | 2  | 7   | 1077256  | 9.67E-01 | 1 |
| TBC1D22A | 310166  | 538 | -25 | 1351732 | 359204  | 0 | 2  | 2 | 0 | 11 | 19  | 5021024  | 9.67E-01 | 1 |
| CTDP1    | 275544  | 498 | -3  | 2448568 | 684944  | 0 | 2  | 0 | 0 | 3  | 3   | 1800648  | 9.67E-01 | 1 |
| CCL3L3   | 691971  | 684 | 13  | 496976  | 131008  | 0 | 1  | 1 | 0 | 6  | 7   | 1275904  | 9.67E-01 | 1 |
| SKAP2    | 1041630 | 540 | 14  | 987900  | 216804  | 0 | 1  | 2 | 0 | 34 | 52  | 12925292 | 9.67E-01 | 1 |
| MFSD1    | 181588  | 972 | 2   | 1349952 | 366324  | 0 | 3  | 2 | 0 | 7  | 11  | 2661100  | 9.67E-01 | 1 |
| PARD6G   | 161542  | NaN | 38  | 907088  | 309364  | 0 | 1  | 0 | 0 | 50 | 71  | 18774372 | 9.67E-01 | 1 |
| PTPN6    | 2704950 | 211 | 47  | 1691356 | 452120  | 0 | 1  | 1 | 0 | 1  | 1   | 1443224  | 9.67E-01 | 1 |
| NOX5     | 370981  | 394 | 26  | 2021012 | 569956  | 0 | 6  | 4 | 0 | 2  | 4   | 1183700  | 9.67E-01 | 1 |
| TOX2     | 639806  | 396 | 14  | 1377008 | 422572  | 0 | 2  | 4 | 0 | 5  | 7   | 1608408  | 9.67E-01 | 1 |
| UNC119   | 1517567 | 225 | 24  | 658600  | 187256  | 0 | 2  | 3 | 0 | 1  | 6   | 697048   | 9.67E-01 | 1 |
| SYT11    | 2096440 | 179 | 32  | 1079748 | 317196  | 0 | 2  | 4 | 0 | 5  | 8   | 2110012  | 9.67E-01 | 1 |
| OSCAR    | 767094  | 317 | -50 | 805272  | 281952  | 0 | 1  | 1 | 0 | 50 | 88  | 18435460 | 9.67E-01 | 1 |
| KIAA2022 | 251853  | NaN | 7   | 3848360 | 1024924 | 0 | 12 | 3 | 0 | 1  | 3   | 1131724  | 9.67E-01 | 1 |
| PC       | 1649909 | 187 | 38  | 2956936 | 903884  | 0 | 6  | 5 | 0 | 24 | 32  | 10055220 | 9.67E-01 | 1 |

|         |         |      |     |         |         |   |   |   |   |    |     |          |          |   |
|---------|---------|------|-----|---------|---------|---|---|---|---|----|-----|----------|----------|---|
| MAPKAPK | 477806  | 261  | 32  | 1086868 | 296192  | 0 | 1 | 2 | 0 | 50 | 60  | 19078752 | 9.67E-01 | 1 |
| PWWP2A  | 199338  | 417  | 21  | 1979716 | 598436  | 0 | 3 | 1 | 0 | 25 | 32  | 9996836  | 9.67E-01 | 1 |
| KRBA2   | 772200  | 257  | 20  | 1258460 | 327520  | 0 | 1 | 1 | 0 | 50 | 52  | 17300532 | 9.67E-01 | 1 |
| FKBP8   | 1394856 | 259  | 48  | 1038452 | 322180  | 0 | 2 | 0 | 0 | 1  | 0   | 449272   | 9.67E-01 | 1 |
| TYSND1  | 471839  | 217  | 32  | 1353156 | 476328  | 0 | 2 | 1 | 0 | 50 | 69  | 19518412 | 9.67E-01 | 1 |
| DRD1    | 178213  | 729  | 14  | 1095056 | 337132  | 0 | 1 | 1 | 0 | 50 | 66  | 21791472 | 9.67E-01 | 1 |
| PHIP    | 209556  | 739  | 0   | 4762212 | 1242084 | 0 | 9 | 1 | 0 | 1  | 2   | 1555364  | 9.67E-01 | 1 |
| TPM4    | 803963  | 298  | 26  | 872200  | 218228  | 0 | 1 | 1 | 0 | 8  | 18  | 4645088  | 9.67E-01 | 1 |
| FBXW10  | 752804  | 391  | -6  | 2709516 | 718764  | 0 | 5 | 4 | 0 | 50 | 50  | 17232180 | 9.67E-01 | 1 |
| KIF18B  | 1037808 | 191  | 34  | 2130304 | 675332  | 0 | 3 | 1 | 0 | 3  | 2   | 1585268  | 9.67E-01 | 1 |
| CLCN6   | 524980  | 196  | 41  | 2341412 | 550732  | 0 | 6 | 5 | 0 | 10 | 15  | 3457828  | 9.67E-01 | 1 |
| SLC17A4 | 272695  | 635  | 29  | 1272344 | 370240  | 0 | 2 | 2 | 0 | 21 | 31  | 7635132  | 9.67E-01 | 1 |
| SELP    | 294306  | 478  | 6   | 2168040 | 563904  | 0 | 4 | 4 | 0 | 22 | 31  | 9368140  | 9.67E-01 | 1 |
| ASTN2   | 63839   | 937  | -17 | 3453912 | 1009260 | 0 | 9 | 2 | 0 | 10 | 17  | 5943776  | 9.67E-01 | 1 |
| DPY19L3 | 308903  | 531  | -54 | 1871848 | 502316  | 0 | 5 | 1 | 0 | 14 | 19  | 4772536  | 9.67E-01 | 1 |
| MTFMT   | 697075  | 170  | 51  | 1000004 | 285868  | 0 | 1 | 1 | 0 | 50 | 53  | 14851608 | 9.67E-01 | 1 |
| EYS     | 28896   | 1167 | -23 | 8103272 | 2097196 | 0 | 8 | 1 | 0 | 2  | 2   | 2740132  | 9.67E-01 | 1 |
| MON1A   | 1289886 | 170  | 38  | 1597728 | 515844  | 0 | 2 | 1 | 0 | 21 | 30  | 9711324  | 9.68E-01 | 1 |
| WRNIP1  | 473112  | 285  | 31  | 1661096 | 498400  | 0 | 1 | 2 | 0 | 50 | 47  | 18385620 | 9.68E-01 | 1 |
| PRKX    | 104714  | NaN  | 11  | 933788  | 250624  | 0 | 1 | 2 | 0 | 28 | 48  | 13159896 | 9.68E-01 | 1 |
| DHRS4   | 984811  | 442  | 23  | 708084  | 217872  | 0 | 2 | 2 | 0 | 3  | 9   | 1530800  | 9.68E-01 | 1 |
| ELMOD3  | 1021843 | 180  | 29  | 1178716 | 334640  | 0 | 2 | 3 | 0 | 19 | 36  | 8553256  | 9.68E-01 | 1 |
| FBXW11  | 380827  | 400  | 36  | 1474196 | 388396  | 0 | 1 | 0 | 0 | 41 | 50  | 19219016 | 9.68E-01 | 1 |
| ANKRD24 | 2194691 | 244  | 41  | 2856188 | 904240  | 0 | 3 | 1 | 0 | 39 | 34  | 15527652 | 9.68E-01 | 1 |
| CYP2U1  | 144587  | 735  | 6   | 1368464 | 396940  | 0 | 1 | 0 | 0 | 18 | 29  | 9541512  | 9.68E-01 | 1 |
| GOLGA6D | NaN     | NaN  | NaN | 1830196 | 468140  | 0 | 2 | 1 | 0 | 50 | 117 | 40113724 | 9.68E-01 | 1 |
| PHLDB3  | 392374  | 166  | -19 | 1625852 | 491992  | 0 | 2 | 0 | 0 | 9  | 8   | 3174096  | 9.68E-01 | 1 |
| USP19   | 1898051 | 203  | 36  | 3331448 | 997156  | 0 | 5 | 3 | 0 | 13 | 27  | 9263832  | 9.68E-01 | 1 |
| PELP1   | 1249398 | 222  | 26  | 2773240 | 920972  | 0 | 4 | 1 | 0 | 16 | 17  | 7261688  | 9.68E-01 | 1 |
| CHD1L   | NaN     | NaN  | NaN | 2350312 | 623000  | 0 | 3 | 2 | 0 | 50 | 118 | 40268584 | 9.68E-01 | 1 |
| LIPI    | 95960   | 991  | -18 | 1274480 | 310432  | 0 | 2 | 0 | 0 | 28 | 43  | 11687836 | 9.68E-01 | 1 |
| NT5DC2  | 1114087 | 192  | 48  | 1545396 | 433608  | 0 | 2 | 3 | 0 | 50 | 74  | 21371748 | 9.68E-01 | 1 |
| CCT3    | 2232742 | 187  | 30  | 1417236 | 387684  | 0 | 4 | 3 | 0 | 10 | 23  | 4939500  | 9.68E-01 | 1 |

|          |         |     |      |         |         |   |    |   |   |    |     |          |          |   |
|----------|---------|-----|------|---------|---------|---|----|---|---|----|-----|----------|----------|---|
| HOMER3   | 1390116 | 198 | 20   | 919904  | 278392  | 0 | 1  | 1 | 0 | 50 | 73  | 19047780 | 9.68E-01 | 1 |
| ELP3     | 417570  | 338 | 41   | 1428984 | 386616  | 0 | 2  | 2 | 0 | 3  | 5   | 1956220  | 9.68E-01 | 1 |
| ANKRD26  | 390573  | 459 | 24   | 4558224 | 1064796 | 0 | 13 | 3 | 0 | 2  | 6   | 2315424  | 9.68E-01 | 1 |
| TM9SF2   | 310978  | 472 | 69   | 1739772 | 456036  | 0 | 3  | 1 | 0 | 20 | 29  | 8270948  | 9.68E-01 | 1 |
| KIAA1407 | 438696  | 487 | 29   | 2467792 | 602708  | 0 | 7  | 4 | 0 | 5  | 6   | 1596304  | 9.68E-01 | 1 |
| SLC34A3  | 1724821 | 399 | 43   | 1471704 | 505164  | 0 | 2  | 2 | 0 | 50 | 60  | 16636592 | 9.68E-01 | 1 |
| NFKB1    | 376672  | 311 | 41   | 2507664 | 698472  | 0 | 2  | 1 | 0 | 7  | 6   | 3930596  | 9.69E-01 | 1 |
| IL17RA   | 183789  | 639 | -103 | 2173736 | 655396  | 0 | 3  | 1 | 0 | 40 | 51  | 17554716 | 9.69E-01 | 1 |
| SCUBE3   | 654416  | 207 | 36   | 2595596 | 681028  | 0 | 2  | 0 | 0 | 2  | 3   | 1858320  | 9.69E-01 | 1 |
| CELA2B   | 636573  | 188 | 34   | 699540  | 199716  | 0 | 3  | 2 | 0 | 2  | 7   | 1049132  | 9.69E-01 | 1 |
| CEP78    | 249135  | 554 | -32  | 1870068 | 510504  | 0 | 4  | 0 | 0 | 12 | 16  | 4412620  | 9.69E-01 | 1 |
| SEPHS2   | 2338593 | 142 | 59   | 1084732 | 353864  | 0 | 1  | 1 | 0 | 50 | 74  | 22010768 | 9.69E-01 | 1 |
| PPP1R3F  | 547555  | NaN | 25   | 1910296 | 667856  | 0 | 1  | 1 | 0 | 12 | 10  | 3450352  | 9.69E-01 | 1 |
| SLC24A5  | 219744  | 588 | -38  | 1282312 | 361340  | 0 | 2  | 0 | 0 | 29 | 52  | 12899660 | 9.69E-01 | 1 |
| SLC25A42 | 1293709 | 215 | 30   | 797084  | 254896  | 0 | 1  | 3 | 0 | 23 | 43  | 9649380  | 9.69E-01 | 1 |
| INCENP   | 2712305 | 253 | 52   | 2346396 | 674976  | 0 | 6  | 1 | 0 | 8  | 25  | 6609496  | 9.69E-01 | 1 |
| SLC11A2  | 566864  | 155 | 40   | 1603068 | 467784  | 0 | 1  | 1 | 0 | 50 | 43  | 19587832 | 9.69E-01 | 1 |
| MYO19    | 416822  | 556 | 23   | 2549672 | 721612  | 0 | 5  | 0 | 0 | 1  | 1   | 1097192  | 9.69E-01 | 1 |
| PRLHR    | 613868  | 617 | 8    | 873980  | 318976  | 0 | 1  | 3 | 0 | 1  | 6   | 1536852  | 9.69E-01 | 1 |
| ZNF365   | 157974  | 731 | -3   | 1797800 | 495196  | 0 | 5  | 1 | 0 | 8  | 12  | 2978652  | 9.69E-01 | 1 |
| ITGB2    | 746455  | 191 | 74   | 1980072 | 551088  | 0 | 6  | 6 | 0 | 6  | 9   | 2297624  | 9.69E-01 | 1 |
| XYLT2    | 1335838 | 196 | 24   | 2144900 | 672484  | 0 | 3  | 3 | 0 | 50 | 70  | 22959864 | 9.69E-01 | 1 |
| CHD3     | 1971623 | 337 | 29   | 5400164 | 1477756 | 0 | 11 | 4 | 0 | 24 | 28  | 10940592 | 9.69E-01 | 1 |
| DHX34    | 1132395 | 232 | 41   | 2842660 | 886796  | 0 | 10 | 2 | 0 | 0  | 2   | 886796   | 9.69E-01 | 1 |
| OR4K1    | 420010  | 827 | -51  | 783200  | 220720  | 0 | 1  | 1 | 0 | 50 | 72  | 16673972 | 9.69E-01 | 1 |
| CSF2RB   | 750264  | 469 | 44   | 2236392 | 692064  | 0 | 2  | 2 | 0 | 50 | 54  | 22237184 | 9.69E-01 | 1 |
| LILRB4   | 978578  | 625 | -1   | 1153084 | 332504  | 0 | 2  | 2 | 0 | 50 | 108 | 22158508 | 9.69E-01 | 1 |
| CTCF     | 1074126 | 147 | 45   | 1902464 | 472768  | 0 | 16 | 4 | 0 | 0  | 4   | 472768   | 9.69E-01 | 1 |
| PTPRN    | 694442  | 193 | 44   | 2460672 | 775368  | 0 | 4  | 2 | 0 | 44 | 64  | 21097984 | 9.69E-01 | 1 |
| RNF5     | 2119974 | 392 | 28   | 470632  | 130652  | 0 | 1  | 2 | 0 | 4  | 7   | 976152   | 9.69E-01 | 1 |
| KRT13    | 1445853 | 325 | -22  | 1161628 | 341048  | 0 | 1  | 1 | 0 | 50 | 58  | 19098688 | 9.69E-01 | 1 |
| PTK2B    | 326685  | 491 | 30   | 2659676 | 704524  | 0 | 5  | 2 | 0 | 27 | 30  | 11271316 | 9.69E-01 | 1 |
| HMGB2    | 249666  | 413 | 23   | 563548  | 126380  | 0 | 3  | 3 | 0 | 2  | 4   | 521540   | 9.69E-01 | 1 |

|         |         |     |     |         |         |   |    |   |   |    |     |          |          |   |
|---------|---------|-----|-----|---------|---------|---|----|---|---|----|-----|----------|----------|---|
| XKR6    | 125681  | 704 | 26  | 1569604 | 498044  | 0 | 1  | 2 | 0 | 50 | 127 | 45340516 | 9.69E-01 | 1 |
| ORAI3   | 1508459 | 247 | 46  | 705948  | 246708  | 0 | 1  | 3 | 0 | 4  | 13  | 2794600  | 9.69E-01 | 1 |
| ITPKB   | 508274  | 407 | 19  | 2337852 | 721968  | 0 | 4  | 1 | 0 | 14 | 19  | 6888244  | 9.69E-01 | 1 |
| GBF1    | 987676  | 141 | 41  | 4750108 | 1375940 | 0 | 14 | 2 | 0 | 0  | 2   | 1375940  | 9.69E-01 | 1 |
| MYB     | 150100  | 410 | 32  | 1979716 | 525812  | 0 | 4  | 0 | 0 | 2  | 3   | 1524748  | 9.69E-01 | 1 |
| SNRNP70 | 2041001 | 200 | 41  | 1106448 | 335352  | 0 | 1  | 0 | 0 | 50 | 75  | 23316220 | 9.69E-01 | 1 |
| GREM2   | 47375   | 688 | -30 | 423640  | 121040  | 0 | 2  | 2 | 0 | 1  | 6   | 637596   | 9.69E-01 | 1 |
| OR2G6   | 112460  | 903 | -20 | 774300  | 241368  | 0 | 1  | 2 | 0 | 6  | 14  | 2846932  | 9.69E-01 | 1 |
| SCAF1   | 1733181 | 195 | 36  | 3148820 | 1100752 | 0 | 5  | 0 | 0 | 4  | 3   | 2087940  | 9.69E-01 | 1 |
| HLTF    | 369132  | 386 | 8   | 2672136 | 670704  | 0 | 3  | 0 | 0 | 6  | 6   | 3584564  | 9.69E-01 | 1 |
| ENG     | 1236941 | 179 | 55  | 1685304 | 511572  | 0 | 2  | 3 | 0 | 7  | 14  | 3338924  | 9.69E-01 | 1 |
| ANGPTL2 | NaN     | NaN | NaN | 1248492 | 351372  | 0 | 1  | 2 | 0 | 50 | 118 | 39996956 | 9.69E-01 | 1 |
| LIMS2   | 603350  | 218 | 42  | 1030264 | 269492  | 0 | 1  | 3 | 0 | 2  | 5   | 1133148  | 9.70E-01 | 1 |
| EPSTI1  | 109052  | 417 | 33  | 1095768 | 274476  | 0 | 1  | 0 | 0 | 3  | 2   | 1231048  | 9.70E-01 | 1 |
| RHCG    | 747784  | 363 | 22  | 1234252 | 348524  | 0 | 4  | 4 | 0 | 4  | 7   | 1191532  | 9.70E-01 | 1 |
| C9orf72 | 93979   | 434 | -12 | 1249560 | 339624  | 0 | 2  | 2 | 0 | 7  | 10  | 2833404  | 9.70E-01 | 1 |
| CX3CR1  | 159083  | 507 | 38  | 973660  | 275900  | 0 | 2  | 2 | 0 | 10 | 16  | 3452488  | 9.70E-01 | 1 |
| SLC9A8  | 649593  | 165 | 52  | 1510864 | 417944  | 0 | 4  | 7 | 0 | 6  | 17  | 2456044  | 9.70E-01 | 1 |
| MTUS1   | 457439  | 237 | -5  | 3515144 | 949096  | 0 | 8  | 1 | 0 | 0  | 1   | 949096   | 9.70E-01 | 1 |
| SUN3    | 147364  | 445 | 21  | 957284  | 236740  | 0 | 2  | 2 | 0 | 7  | 13  | 2683172  | 9.70E-01 | 1 |
| KIR2DL3 | 1155455 | 625 | -10 | 882880  | 244928  | 0 | 2  | 1 | 0 | 50 | 146 | 23999028 | 9.70E-01 | 1 |
| ALAS2   | 245504  | NaN | 8   | 1567112 | 440728  | 0 | 2  | 2 | 0 | 50 | 78  | 23195536 | 9.70E-01 | 1 |
| WNT6    | 1087669 | 386 | 42  | 886796  | 298684  | 0 | 1  | 1 | 0 | 50 | 74  | 18604204 | 9.70E-01 | 1 |
| PDE10A  | 46364   | 571 | -26 | 2123896 | 545036  | 0 | 4  | 3 | 0 | 50 | 93  | 20218664 | 9.70E-01 | 1 |
| AAAS    | 1701810 | 166 | 58  | 1387332 | 431472  | 0 | 4  | 0 | 0 | 0  | 0   | 431472   | 9.70E-01 | 1 |
| NTN5    | 1597109 | 242 | 31  | 1199008 | 396584  | 0 | 1  | 0 | 0 | 3  | 2   | 1342120  | 9.70E-01 | 1 |
| C2orf69 | 214653  | 674 | 14  | 976864  | 264152  | 0 | 1  | 0 | 0 | 50 | 62  | 16806048 | 9.70E-01 | 1 |
| SLC1A7  | 509533  | 391 | 21  | 1399436 | 440728  | 0 | 1  | 0 | 0 | 10 | 15  | 6355668  | 9.70E-01 | 1 |
| ADA     | 801801  | 171 | 42  | 956572  | 256676  | 0 | 2  | 3 | 0 | 7  | 18  | 3520128  | 9.70E-01 | 1 |
| TMEM44  | 370452  | 255 | 34  | 1269496 | 334640  | 0 | 1  | 2 | 0 | 50 | 55  | 18948812 | 9.70E-01 | 1 |
| ADAM7   | 56052   | 741 | 6   | 2024216 | 485584  | 0 | 2  | 0 | 0 | 34 | 52  | 18932080 | 9.70E-01 | 1 |
| ZNF627  | 1065261 | 394 | 15  | 1191532 | 301532  | 0 | 3  | 0 | 0 | 8  | 15  | 3051988  | 9.70E-01 | 1 |
| MTMR8   | 56100   | NaN | 0   | 1838384 | 478108  | 0 | 3  | 2 | 0 | 7  | 9   | 2998588  | 9.70E-01 | 1 |

|         |         |      |     |          |         |   |    |    |   |    |    |          |          |   |
|---------|---------|------|-----|----------|---------|---|----|----|---|----|----|----------|----------|---|
| THOC1   | 402181  | 689  | -26 | 1775016  | 420792  | 0 | 3  | 0  | 0 | 50 | 69 | 19550808 | 9.70E-01 | 1 |
| ANAPC1  | NaN     | NaN  | NaN | 5059116  | 1373448 | 0 | 13 | 2  | 0 | 9  | 18 | 5730888  | 9.70E-01 | 1 |
| INA     | 522257  | 125  | 41  | 1217164  | 395516  | 0 | 1  | 0  | 0 | 26 | 23 | 8384512  | 9.70E-01 | 1 |
| BEND2   | 66906   | NaN  | 11  | 2091144  | 555360  | 0 | 4  | 1  | 0 | 5  | 5  | 2259532  | 9.70E-01 | 1 |
| TSPYL2  | 884583  | NaN  | 77  | 1795664  | 453544  | 0 | 1  | 0  | 0 | 11 | 11 | 5843384  | 9.70E-01 | 1 |
| AGBL4   | 16483   | 1041 | -18 | 1333932  | 336420  | 0 | 1  | 0  | 0 | 50 | 78 | 21636968 | 9.70E-01 | 1 |
| PKN1    | 954144  | 204  | 43  | 2407272  | 751872  | 0 | 1  | 0  | 0 | 8  | 7  | 4677128  | 9.70E-01 | 1 |
| UGDH    | 658220  | 165  | 48  | 1285516  | 347456  | 0 | 2  | 1  | 0 | 50 | 60 | 15242496 | 9.70E-01 | 1 |
| FMN1    | 238197  | 520  | 5   | 3054480  | 849060  | 0 | 2  | 0  | 0 | 21 | 15 | 9349984  | 9.70E-01 | 1 |
| IKZF5   | 274189  | 673  | 11  | 1078680  | 281952  | 0 | 1  | 0  | 0 | 50 | 64 | 18840944 | 9.70E-01 | 1 |
| PHF19   | 645995  | 270  | 39  | 1634752  | 454256  | 0 | 2  | 1  | 0 | 50 | 78 | 24143564 | 9.70E-01 | 1 |
| PIK3CD  | 533533  | 204  | 35  | 2686020  | 756144  | 0 | 5  | 0  | 0 | 0  | 0  | 756144   | 9.71E-01 | 1 |
| MAGED1  | 127069  | NaN  | 23  | 2112148  | 618728  | 0 | 2  | 1  | 0 | 50 | 36 | 16563612 | 9.71E-01 | 1 |
| CALU    | 852821  | 304  | 33  | 1027772  | 221788  | 0 | 1  | 0  | 0 | 50 | 94 | 24312664 | 9.71E-01 | 1 |
| PKD1L1  | 239031  | 377  | 12  | 7277352  | 2093280 | 0 | 14 | 9  | 0 | 50 | 67 | 22345052 | 9.71E-01 | 1 |
| ZNF671  | 680410  | 849  | -50 | 1365972  | 363120  | 0 | 8  | 6  | 0 | 3  | 10 | 1245288  | 9.71E-01 | 1 |
| SCN1B   | 738570  | 419  | -34 | 864012   | 244572  | 0 | 1  | 1  | 0 | 50 | 80 | 19399508 | 9.71E-01 | 1 |
| TNKS2   | 333272  | 331  | 15  | 3014964  | 835176  | 0 | 10 | 1  | 0 | 0  | 1  | 835176   | 9.71E-01 | 1 |
| DIP2C   | 406596  | 632  | 12  | 3969400  | 1175156 | 0 | 11 | 2  | 0 | 9  | 12 | 4006780  | 9.71E-01 | 1 |
| QSOX2   | 936497  | 244  | 40  | 1758996  | 529728  | 0 | 2  | 0  | 0 | 8  | 16 | 5966560  | 9.71E-01 | 1 |
| TPH1    | 645462  | 571  | 16  | 1171240  | 295124  | 0 | 2  | 2  | 0 | 8  | 9  | 2418308  | 9.71E-01 | 1 |
| TTLL1   | 627533  | 202  | 46  | 1108940  | 288004  | 0 | 2  | 3  | 0 | 14 | 28 | 6756524  | 9.71E-01 | 1 |
| PKHD1   | 237026  | 946  | 0   | 10390928 | 2986840 | 0 | 29 | 15 | 0 | 27 | 45 | 12292680 | 9.71E-01 | 1 |
| SEMA5A  | 45422   | 891  | -2  | 2780360  | 753652  | 0 | 5  | 5  | 0 | 25 | 29 | 10425104 | 9.71E-01 | 1 |
| TSPAN14 | 308181  | 588  | -12 | 713424   | 189036  | 0 | 2  | 3  | 0 | 2  | 3  | 690640   | 9.71E-01 | 1 |
| ANP32D  | 904892  | 390  | 11  | 333572   | 88288   | 0 | 1  | 2  | 0 | 2  | 5  | 609472   | 9.71E-01 | 1 |
| ZNF138  | 213856  | 1035 | -19 | 969744   | 218940  | 0 | 1  | 1  | 0 | 50 | 80 | 21697488 | 9.71E-01 | 1 |
| SLC2A6  | 1858670 | 315  | 39  | 1241372  | 426844  | 0 | 3  | 4  | 0 | 14 | 26 | 5231420  | 9.71E-01 | 1 |
| ZC3H4   | 1263858 | 179  | 37  | 3251348  | 986476  | 0 | 8  | 2  | 0 | 12 | 19 | 6006788  | 9.71E-01 | 1 |
| MYH6    | 1220624 | 456  | 31  | 5048792  | 1327168 | 0 | 13 | 4  | 0 | 6  | 13 | 4269864  | 9.71E-01 | 1 |
| HERC3   | 219535  | 452  | 13  | 2742980  | 726952  | 0 | 3  | 0  | 0 | 11 | 11 | 5542208  | 9.71E-01 | 1 |
| SENP2   | 943739  | 367  | 46  | 1560704  | 398008  | 0 | 2  | 0  | 0 | 50 | 75 | 23064528 | 9.71E-01 | 1 |
| LENG9   | 807048  | 535  | -7  | 1179072  | 431472  | 0 | 2  | 2  | 0 | 50 | 83 | 18359276 | 9.71E-01 | 1 |

|         |         |      |     |          |         |   |    |   |   |    |     |          |          |   |
|---------|---------|------|-----|----------|---------|---|----|---|---|----|-----|----------|----------|---|
| DNAH6   | NaN     | NaN  | NaN | 10811008 | 2839100 | 0 | 12 | 2 | 0 | 0  | 2   | 2839100  | 9.71E-01 | 1 |
| ZNF100  | 144970  | 1235 | -65 | 1415456  | 341404  | 0 | 3  | 0 | 0 | 16 | 27  | 6560368  | 9.71E-01 | 1 |
| PHLDB1  | 1404506 | 161  | 46  | 3417600  | 1091496 | 0 | 8  | 3 | 0 | 22 | 37  | 11314748 | 9.71E-01 | 1 |
| ZNF274  | 1390072 | 581  | -58 | 1676760  | 447492  | 0 | 4  | 2 | 0 | 50 | 127 | 30675096 | 9.71E-01 | 1 |
| NUP85   | 1723762 | 171  | 31  | 1723040  | 461020  | 0 | 7  | 4 | 0 | 7  | 23  | 3592396  | 9.71E-01 | 1 |
| GPC3    | 96913   | NaN  | 25  | 1564976  | 404416  | 0 | 1  | 0 | 0 | 9  | 8   | 3315784  | 9.72E-01 | 1 |
| MLYCD   | 387177  | 550  | -6  | 1212536  | 389464  | 0 | 2  | 1 | 0 | 4  | 6   | 1756148  | 9.72E-01 | 1 |
| APBA3   | 2144458 | 206  | 34  | 1426136  | 462088  | 0 | 1  | 0 | 0 | 13 | 11  | 5053064  | 9.72E-01 | 1 |
| OR2M2   | 19998   | 935  | -32 | 862588   | 250268  | 0 | 2  | 3 | 0 | 7  | 15  | 2404780  | 9.72E-01 | 1 |
| NOG     | 268027  | 457  | -44 | 562480   | 184052  | 0 | 2  | 2 | 0 | 3  | 7   | 965828   | 9.72E-01 | 1 |
| SGALNAC | 171847  | 356  | 17  | 1370244  | 363120  | 0 | 1  | 2 | 0 | 50 | 50  | 18852692 | 9.72E-01 | 1 |
| SCN5A   | 366751  | 578  | 25  | 5197244  | 1483096 | 0 | 17 | 5 | 0 | 1  | 5   | 1748316  | 9.72E-01 | 1 |
| NAPSA   | 1072052 | 528  | 26  | 1044860  | 342472  | 0 | 2  | 3 | 0 | 4  | 8   | 1979004  | 9.72E-01 | 1 |
| MTX1    | 1801444 | 194  | 32  | 1150236  | 375936  | 0 | 2  | 0 | 0 | 1  | 0   | 479532   | 9.72E-01 | 1 |
| CELSR3  | 1516147 | 212  | 41  | 8089744  | 2670356 | 0 | 20 | 7 | 0 | 2  | 7   | 3185132  | 9.72E-01 | 1 |
| ATP9B   | 91487   | 731  | 13  | 2986484  | 817732  | 0 | 4  | 1 | 0 | 50 | 52  | 21721340 | 9.72E-01 | 1 |
| LRRC16B | 992350  | 355  | 19  | 3514432  | 1051268 | 0 | 6  | 1 | 0 | 5  | 5   | 2775732  | 9.72E-01 | 1 |
| SPATA21 | 813996  | 191  | 40  | 1208976  | 343896  | 0 | 1  | 3 | 0 | 20 | 19  | 6157376  | 9.72E-01 | 1 |
| ZFX     | 615356  | NaN  | 50  | 2145612  | 529728  | 0 | 4  | 2 | 0 | 50 | 63  | 18195160 | 9.72E-01 | 1 |
| FOXRED1 | 385871  | 426  | 29  | 1238168  | 367036  | 0 | 2  | 3 | 0 | 5  | 7   | 2062664  | 9.72E-01 | 1 |
| THAP9   | 778608  | 268  | 42  | 2302964  | 610540  | 0 | 3  | 4 | 0 | 11 | 17  | 5686032  | 9.72E-01 | 1 |
| ZNF384  | 2816983 | 210  | 61  | 1474196  | 416164  | 0 | 2  | 0 | 0 | 25 | 55  | 15777920 | 9.72E-01 | 1 |
| PJA1    | 136194  | NaN  | 39  | 1610900  | 452476  | 0 | 3  | 2 | 0 | 50 | 77  | 18855184 | 9.72E-01 | 1 |
| NACC1   | 1948449 | 221  | 41  | 1324676  | 388396  | 0 | 1  | 1 | 0 | 50 | 60  | 21446864 | 9.72E-01 | 1 |
| LRRC14B | 836250  | 543  | 14  | 1223572  | 432896  | 0 | 2  | 3 | 0 | 25 | 47  | 10315812 | 9.72E-01 | 1 |
| CCNT1   | 1705947 | 328  | 30  | 1846572  | 519048  | 0 | 4  | 2 | 0 | 12 | 18  | 4998596  | 9.72E-01 | 1 |
| FGD5    | 489640  | 490  | 39  | 3695280  | 1073340 | 0 | 8  | 2 | 0 | 13 | 18  | 6930608  | 9.72E-01 | 1 |
| ZER1    | 1816626 | 165  | 36  | 1978292  | 543256  | 0 | 3  | 4 | 0 | 39 | 73  | 17627340 | 9.72E-01 | 1 |
| TRPC6   | 70247   | 847  | -24 | 2410832  | 626560  | 0 | 7  | 2 | 0 | 27 | 49  | 11532264 | 9.72E-01 | 1 |
| TAF4    | 801904  | 411  | -25 | 2619448  | 919904  | 0 | 5  | 1 | 0 | 1  | 5   | 2398016  | 9.72E-01 | 1 |
| GPR17   | NaN     | NaN  | NaN | 894628   | 291920  | 0 | 2  | 4 | 0 | 2  | 8   | 1148456  | 9.72E-01 | 1 |
| GMEB1   | 817267  | 128  | 27  | 1475976  | 406908  | 0 | 1  | 1 | 0 | 50 | 63  | 23807144 | 9.72E-01 | 1 |
| RHPN2   | 458398  | 356  | -12 | 1769676  | 493416  | 0 | 1  | 2 | 0 | 34 | 30  | 15785040 | 9.72E-01 | 1 |

|          |         |      |     |         |         |   |    |   |   |    |     |          |          |   |
|----------|---------|------|-----|---------|---------|---|----|---|---|----|-----|----------|----------|---|
| SPDYE3   | 1430637 | 204  | 54  | 1419728 | 385192  | 0 | 4  | 1 | 0 | 1  | 1   | 604844   | 9.72E-01 | 1 |
| ALS2     | 438202  | 523  | 29  | 4330028 | 1204348 | 0 | 4  | 3 | 0 | 22 | 10  | 6876852  | 9.72E-01 | 1 |
| FBXO47   | 1256859 | 143  | 31  | 1198296 | 295836  | 0 | 1  | 1 | 0 | 50 | 76  | 22095496 | 9.72E-01 | 1 |
| NR4A3    | 280636  | 538  | 8   | 1660740 | 496620  | 0 | 1  | 1 | 0 | 50 | 63  | 23469656 | 9.72E-01 | 1 |
| OR2L13   | 24438   | 1015 | -27 | 779284  | 227840  | 0 | 1  | 0 | 0 | 47 | 108 | 21910732 | 9.72E-01 | 1 |
| NOC4L    | 608356  | 528  | 26  | 1323252 | 397296  | 0 | 1  | 1 | 0 | 50 | 70  | 22588912 | 9.73E-01 | 1 |
| ZNF592   | 344313  | 214  | 42  | 3170536 | 926312  | 0 | 3  | 1 | 0 | 5  | 9   | 3184064  | 9.73E-01 | 1 |
| TLR2     | 143076  | 685  | 18  | 1977936 | 541476  | 0 | 3  | 3 | 0 | 50 | 60  | 18833468 | 9.73E-01 | 1 |
| KIF2C    | 574317  | 191  | 43  | 1915992 | 495552  | 0 | 4  | 5 | 0 | 6  | 14  | 2995384  | 9.73E-01 | 1 |
| CNN1     | 1152381 | 272  | 31  | 771808  | 208616  | 0 | 1  | 2 | 0 | 8  | 13  | 2728740  | 9.73E-01 | 1 |
| PCNXL3   | 4038877 | 202  | 49  | 5048080 | 1617308 | 0 | 7  | 7 | 0 | 24 | 26  | 11885772 | 9.73E-01 | 1 |
| ZSWIM4   | 754888  | 241  | 31  | 2444296 | 778928  | 0 | 4  | 4 | 0 | 50 | 63  | 19916776 | 9.73E-01 | 1 |
| CD247    | 478690  | 558  | 10  | 445712  | 112852  | 0 | 1  | 2 | 0 | 3  | 9   | 1203636  | 9.73E-01 | 1 |
| ATXN7L1  | 406187  | 454  | 33  | 2229272 | 678892  | 0 | 2  | 0 | 0 | 19 | 16  | 7534384  | 9.73E-01 | 1 |
| SLCO1C1  | 91874   | 501  | -24 | 1969392 | 484872  | 0 | 11 | 7 | 0 | 4  | 16  | 2107520  | 9.73E-01 | 1 |
| KCND1    | 834590  | NaN  | 41  | 1590964 | 506588  | 0 | 2  | 0 | 0 | 50 | 75  | 21713152 | 9.73E-01 | 1 |
| TMPRSS6  | 699535  | 379  | 44  | 2075124 | 599148  | 0 | 5  | 0 | 0 | 2  | 2   | 1062660  | 9.73E-01 | 1 |
| POFUT1   | 1013932 | 190  | 56  | 1029196 | 292988  | 0 | 1  | 1 | 0 | 50 | 69  | 20279184 | 9.73E-01 | 1 |
| CUX1     | 554381  | 461  | 45  | 4565344 | 1305452 | 0 | 9  | 2 | 0 | 8  | 11  | 5331812  | 9.73E-01 | 1 |
| TFAP2B   | 17044   | 1081 | -14 | 1151660 | 351016  | 0 | 3  | 3 | 0 | 5  | 10  | 2154512  | 9.73E-01 | 1 |
| SLC19A3  | 164044  | 353  | -10 | 1257392 | 356356  | 0 | 1  | 1 | 0 | 22 | 30  | 9433644  | 9.73E-01 | 1 |
| CRTAC1   | 530090  | 369  | 12  | 1728736 | 452120  | 0 | 2  | 2 | 0 | 50 | 74  | 22251780 | 9.73E-01 | 1 |
| PARP12   | 462854  | 639  | 35  | 1804920 | 491280  | 0 | 2  | 1 | 0 | 50 | 71  | 22248576 | 9.73E-01 | 1 |
| ZNF24    | 306655  | 499  | 43  | 939840  | 255252  | 0 | 1  | 0 | 0 | 50 | 78  | 19811756 | 9.73E-01 | 1 |
| HCN4     | 314300  | 642  | 16  | 2908876 | 978644  | 0 | 4  | 4 | 0 | 38 | 40  | 17576076 | 9.73E-01 | 1 |
| MAP3K11  | 3945819 | 202  | 45  | 2066580 | 688860  | 0 | 2  | 1 | 0 | 19 | 25  | 9711324  | 9.73E-01 | 1 |
| ESR2     | 528074  | 387  | 46  | 1432900 | 392312  | 0 | 2  | 3 | 0 | 8  | 9   | 2790684  | 9.73E-01 | 1 |
| BICD1    | 387398  | 460  | 23  | 2497696 | 669992  | 0 | 3  | 2 | 0 | 9  | 25  | 9750484  | 9.73E-01 | 1 |
| SPATS2L  | 476225  | 433  | 24  | 1449632 | 388396  | 0 | 2  | 3 | 0 | 6  | 9   | 2080108  | 9.73E-01 | 1 |
| INTS1    | 595899  | 243  | 38  | 5518356 | 1702392 | 0 | 12 | 5 | 0 | 31 | 45  | 14566808 | 9.74E-01 | 1 |
| SLC22A18 | 552601  | 256  | 34  | 1041300 | 360984  | 0 | 1  | 2 | 0 | 12 | 15  | 4721272  | 9.74E-01 | 1 |
| CHRNA3   | 495901  | 373  | 46  | 1432544 | 387328  | 0 | 1  | 2 | 0 | 46 | 55  | 17838804 | 9.74E-01 | 1 |
| ACVR2B   | 337567  | 514  | 28  | 1314708 | 373800  | 0 | 2  | 1 | 0 | 12 | 12  | 3515144  | 9.74E-01 | 1 |



|         |         |      |     |         |         |   |    |   |   |    |    |          |          |   |
|---------|---------|------|-----|---------|---------|---|----|---|---|----|----|----------|----------|---|
| COL1A2  | 461036  | 499  | -14 | 3435400 | 1162340 | 0 | 8  | 3 | 0 | 5  | 6  | 2373808  | 9.74E-01 | 1 |
| SIN3B   | 854784  | 305  | 35  | 2979364 | 830192  | 0 | 4  | 4 | 0 | 49 | 77 | 22853064 | 9.74E-01 | 1 |
| ESYT3   | 201756  | 408  | 19  | 2266296 | 669636  | 0 | 3  | 3 | 0 | 26 | 24 | 8426876  | 9.74E-01 | 1 |
| MIER2   | 901402  | 578  | -17 | 1407624 | 399432  | 0 | 3  | 1 | 0 | 50 | 99 | 20859820 | 9.74E-01 | 1 |
| HARS2   | 774470  | 356  | 31  | 1308300 | 367392  | 0 | 1  | 0 | 0 | 19 | 25 | 9696372  | 9.74E-01 | 1 |
| LYST    | 438216  | 401  | 9   | 9812072 | 2587408 | 0 | 29 | 6 | 0 | 2  | 19 | 6110028  | 9.74E-01 | 1 |
| KANK3   | 752886  | 204  | 7   | 1986124 | 690284  | 0 | 2  | 1 | 0 | 23 | 34 | 12142092 | 9.74E-01 | 1 |
| KLHL26  | 1397040 | 222  | 33  | 1506236 | 478108  | 0 | 1  | 3 | 0 | 50 | 56 | 22349324 | 9.74E-01 | 1 |
| OR4Q3   | 275024  | 858  | -57 | 774300  | 229620  | 0 | 3  | 4 | 0 | 3  | 9  | 929160   | 9.74E-01 | 1 |
| GCK     | 1321842 | 282  | 62  | 1285872 | 350304  | 0 | 1  | 3 | 0 | 6  | 8  | 1864728  | 9.74E-01 | 1 |
| INMT    | 463251  | 489  | 22  | 659312  | 197224  | 0 | 1  | 2 | 0 | 3  | 6  | 1442156  | 9.74E-01 | 1 |
| MAP3K14 | 789809  | 207  | 23  | 2396592 | 703812  | 0 | 3  | 3 | 0 | 43 | 50 | 19051340 | 9.74E-01 | 1 |
| CENPF   | 457503  | 186  | -7  | 8073724 | 1987904 | 0 | 16 | 9 | 0 | 50 | 63 | 20559712 | 9.74E-01 | 1 |
| ATP2A2  | 969445  | 178  | 26  | 2677476 | 762552  | 0 | 7  | 5 | 0 | 50 | 83 | 22052064 | 9.74E-01 | 1 |
| MINK1   | 1440940 | 208  | 29  | 3232836 | 921684  | 0 | 4  | 4 | 0 | 50 | 56 | 21043872 | 9.74E-01 | 1 |
| MCC     | 271270  | 620  | 16  | 2678900 | 729088  | 0 | 7  | 2 | 0 | 3  | 4  | 1710580  | 9.74E-01 | 1 |
| WDR1    | 223391  | 873  | 42  | 1576724 | 427912  | 0 | 3  | 4 | 0 | 24 | 30 | 7611992  | 9.74E-01 | 1 |
| TATDN2  | 743522  | 224  | 53  | 1922756 | 548596  | 0 | 2  | 0 | 0 | 14 | 17 | 6359584  | 9.74E-01 | 1 |
| RBCK1   | 802744  | 165  | 41  | 1333576 | 370952  | 0 | 1  | 2 | 0 | 50 | 55 | 17464292 | 9.74E-01 | 1 |
| GUF1    | 62787   | 1009 | 2   | 1738348 | 476684  | 0 | 2  | 1 | 0 | 50 | 59 | 20161348 | 9.74E-01 | 1 |
| TFF2    | 313101  | 464  | 90  | 341760  | 87576   | 0 | 1  | 1 | 0 | 3  | 3  | 451764   | 9.74E-01 | 1 |
| OR5J2   | 10101   | 1007 | -38 | 770384  | 230332  | 0 | 2  | 1 | 0 | 3  | 5  | 1002140  | 9.74E-01 | 1 |
| OLIG2   | 824830  | 554  | 61  | 769316  | 273052  | 0 | 1  | 0 | 0 | 2  | 1  | 601996   | 9.74E-01 | 1 |
| MAP4K2  | 2261775 | 230  | 61  | 2144544 | 620508  | 0 | 3  | 1 | 0 | 36 | 57 | 17760128 | 9.74E-01 | 1 |
| GPR15   | 390532  | 796  | 2   | 890000  | 264508  | 0 | 2  | 1 | 0 | 2  | 2  | 680316   | 9.74E-01 | 1 |
| IGSF9   | 807549  | 310  | 10  | 2887872 | 974016  | 0 | 5  | 5 | 0 | 50 | 80 | 24723488 | 9.74E-01 | 1 |
| WDR63   | 443738  | 623  | 11  | 2383776 | 568176  | 0 | 4  | 0 | 0 | 4  | 10 | 3002504  | 9.74E-01 | 1 |
| MAGEB6  | 34143   | NaN  | -38 | 1006412 | 305092  | 0 | 5  | 4 | 0 | 2  | 8  | 1099684  | 9.74E-01 | 1 |
| NBEAL2  | 537135  | 371  | 45  | 6839116 | 2214320 | 0 | 8  | 3 | 0 | 9  | 10 | 5252424  | 9.74E-01 | 1 |
| SARDH   | 720319  | 481  | 29  | 2331088 | 698828  | 0 | 2  | 4 | 0 | 50 | 63 | 24101912 | 9.75E-01 | 1 |
| ZBTB39  | 2065204 | 199  | 34  | 1783916 | 504808  | 0 | 4  | 3 | 0 | 18 | 28 | 6101484  | 9.75E-01 | 1 |
| ATP10A  | 104149  | 1350 | -49 | 3756156 | 1135284 | 0 | 17 | 8 | 0 | 10 | 23 | 4422944  | 9.75E-01 | 1 |
| USP42   | 1663156 | 229  | 43  | 2163056 | 587044  | 0 | 4  | 1 | 0 | 5  | 7  | 2676764  | 9.75E-01 | 1 |

|          |         |     |     |         |         |   |    |    |   |    |     |          |          |   |
|----------|---------|-----|-----|---------|---------|---|----|----|---|----|-----|----------|----------|---|
| SNX9     | 255375  | 169 | 40  | 1592744 | 389464  | 0 | 2  | 0  | 0 | 17 | 21  | 6573184  | 9.75E-01 | 1 |
| WEE2     | 200522  | 844 | 14  | 1472772 | 394092  | 0 | 2  | 2  | 0 | 50 | 60  | 17687504 | 9.75E-01 | 1 |
| LAMC1    | 767936  | 374 | 17  | 4175168 | 1098616 | 0 | 10 | 1  | 0 | 4  | 4   | 2174448  | 9.75E-01 | 1 |
| TCERG1   | 377370  | 463 | 14  | 2841236 | 771808  | 0 | 3  | 2  | 0 | 48 | 40  | 17922108 | 9.75E-01 | 1 |
| ANGEL2   | 315884  | 412 | 12  | 1412252 | 368104  | 0 | 1  | 0  | 0 | 49 | 65  | 24874788 | 9.75E-01 | 1 |
| IPO11    | 176850  | 735 | 18  | 2694208 | 684944  | 0 | 3  | 0  | 0 | 24 | 18  | 7786076  | 9.75E-01 | 1 |
| HSPD1    | 681973  | 428 | 29  | 1467076 | 419012  | 0 | 5  | 0  | 0 | 1  | 1   | 594520   | 9.75E-01 | 1 |
| STARD3   | 1224964 | 213 | 33  | 1201856 | 300820  | 0 | 1  | 3  | 0 | 18 | 23  | 6688172  | 9.75E-01 | 1 |
| FADS2    | 1618824 | 212 | 64  | 1177648 | 295124  | 0 | 1  | 0  | 0 | 34 | 55  | 17629832 | 9.75E-01 | 1 |
| UGT1A4   | NaN     | NaN | NaN | 1340696 | 392668  | 0 | 1  | 0  | 0 | 50 | 116 | 40038252 | 9.75E-01 | 1 |
| CFP      | 775214  | NaN | 38  | 1202212 | 344252  | 0 | 1  | 0  | 0 | 5  | 7   | 2499476  | 9.75E-01 | 1 |
| TRPC4AP  | 1128095 | 236 | 45  | 2069428 | 566396  | 0 | 4  | 4  | 0 | 42 | 84  | 23723128 | 9.75E-01 | 1 |
| PTPRR    | 157760  | 458 | -26 | 1705240 | 458528  | 0 | 6  | 4  | 0 | 7  | 25  | 5204008  | 9.75E-01 | 1 |
| SMAD3    | 444194  | 194 | 45  | 1170528 | 311856  | 0 | 7  | 4  | 0 | 3  | 8   | 1107872  | 9.75E-01 | 1 |
| KLHL25   | 159493  | 592 | -11 | 1458888 | 440016  | 0 | 1  | 2  | 0 | 24 | 28  | 10013212 | 9.75E-01 | 1 |
| MYOM1    | 593610  | 424 | 50  | 4385564 | 1174444 | 0 | 11 | 6  | 0 | 13 | 27  | 6017112  | 9.75E-01 | 1 |
| C16orf89 | 594046  | 302 | 6   | 1226420 | 360628  | 0 | 1  | 3  | 0 | 5  | 9   | 2842660  | 9.75E-01 | 1 |
| ZBTB4    | 1906324 | 206 | 33  | 2398372 | 859028  | 0 | 5  | 3  | 0 | 8  | 11  | 3438248  | 9.75E-01 | 1 |
| JPH3     | 594064  | 251 | 23  | 1844436 | 572448  | 0 | 2  | 3  | 0 | 16 | 17  | 6268448  | 9.75E-01 | 1 |
| PTPRS    | 1002562 | 262 | 26  | 4932736 | 1469924 | 0 | 10 | 5  | 0 | 50 | 50  | 20143904 | 9.75E-01 | 1 |
| KALRN    | 315141  | 549 | 32  | 7875076 | 2109656 | 0 | 25 | 12 | 0 | 8  | 17  | 4937720  | 9.75E-01 | 1 |
| PNPLA6   | 610314  | 205 | 34  | 3462812 | 1089004 | 0 | 5  | 3  | 0 | 21 | 22  | 10213640 | 9.75E-01 | 1 |
| ELAC2    | 93345   | 606 | -52 | 2152020 | 595944  | 0 | 2  | 0  | 0 | 1  | 0   | 867572   | 9.75E-01 | 1 |
| DHX58    | 2171374 | 206 | 37  | 1732296 | 493416  | 0 | 3  | 3  | 0 | 4  | 5   | 1887512  | 9.75E-01 | 1 |
| DUOXA1   | 667418  | 544 | 27  | 1305096 | 380208  | 0 | 1  | 2  | 0 | 50 | 85  | 27585372 | 9.75E-01 | 1 |
| AHDC1    | 738004  | 217 | 25  | 3801368 | 1346392 | 0 | 5  | 1  | 0 | 3  | 6   | 2931660  | 9.75E-01 | 1 |
| SLC25A6  | NaN     | NaN | NaN | 776792  | 233536  | 0 | 1  | 3  | 0 | 8  | 19  | 4159504  | 9.75E-01 | 1 |
| GUSB     | 434728  | 365 | 31  | 1664656 | 471344  | 0 | 1  | 2  | 0 | 50 | 41  | 17099748 | 9.76E-01 | 1 |
| SYTL4    | 199096  | NaN | 47  | 1765048 | 456392  | 0 | 3  | 1  | 0 | 4  | 5   | 1364548  | 9.76E-01 | 1 |
| RPL36    | 879991  | 295 | 21  | 276968  | 77608   | 0 | 1  | 1  | 0 | 2  | 5   | 463512   | 9.76E-01 | 1 |
| CCNK     | 345332  | 429 | 2   | 1469568 | 434676  | 0 | 1  | 0  | 0 | 15 | 24  | 8144568  | 9.76E-01 | 1 |
| MKNK2    | 1853815 | 239 | 37  | 1295840 | 352084  | 0 | 1  | 0  | 0 | 50 | 68  | 23613124 | 9.76E-01 | 1 |
| MUC15    | 21485   | 951 | -18 | 913852  | 263084  | 0 | 4  | 4  | 0 | 1  | 8   | 947316   | 9.76E-01 | 1 |

|          |         |      |     |         |         |   |    |   |   |    |    |          |          |   |
|----------|---------|------|-----|---------|---------|---|----|---|---|----|----|----------|----------|---|
| ZNRF4    | 932785  | 365  | 19  | 1029196 | 352796  | 0 | 3  | 0 | 0 | 0  | 0  | 352796   | 9.76E-01 | 1 |
| SGCZ     | 3398    | 1175 | -34 | 804204  | 228552  | 0 | 1  | 1 | 0 | 15 | 25 | 5464244  | 9.76E-01 | 1 |
| HIPK1    | 350373  | 545  | 10  | 3119272 | 935924  | 0 | 8  | 1 | 0 | 0  | 1  | 935924   | 9.76E-01 | 1 |
| NCL      | 1052303 | 216  | 43  | 1857964 | 475616  | 0 | 2  | 0 | 0 | 12 | 14 | 5327540  | 9.76E-01 | 1 |
| LMAN1L   | 764533  | 195  | 46  | 1328592 | 417588  | 0 | 4  | 3 | 0 | 11 | 14 | 2513716  | 9.76E-01 | 1 |
| LRCH2    | 210224  | NaN  | -8  | 2014604 | 527236  | 0 | 2  | 0 | 0 | 5  | 13 | 5668588  | 9.76E-01 | 1 |
| SLC38A7  | 572798  | 188  | 2   | 1166256 | 355644  | 0 | 1  | 2 | 0 | 50 | 64 | 20692144 | 9.76E-01 | 1 |
| DSC2     | 213526  | 521  | -12 | 2347820 | 651124  | 0 | 5  | 3 | 0 | 8  | 9  | 3134224  | 9.76E-01 | 1 |
| SDC1     | 532338  | 320  | 37  | 765400  | 248132  | 0 | 3  | 3 | 0 | 1  | 3  | 470988   | 9.76E-01 | 1 |
| MYEF2    | 219744  | 588  | -38 | 1594524 | 399432  | 0 | 3  | 1 | 0 | 50 | 80 | 20921764 | 9.76E-01 | 1 |
| SLC7A9   | 475532  | 451  | -24 | 1247068 | 367748  | 0 | 1  | 3 | 0 | 13 | 17 | 5519424  | 9.76E-01 | 1 |
| LMOD3    | 264082  | 443  | 20  | 1447852 | 358136  | 0 | 2  | 3 | 0 | 7  | 7  | 2245292  | 9.76E-01 | 1 |
| THRA     | 1573630 | 202  | 28  | 1403708 | 332860  | 0 | 1  | 1 | 0 | 50 | 61 | 21397024 | 9.76E-01 | 1 |
| EXOC6B   | 148260  | 625  | -1  | 2151308 | 542188  | 0 | 2  | 1 | 0 | 15 | 18 | 7854072  | 9.76E-01 | 1 |
| TRIM41   | 1034999 | 415  | 35  | 1663232 | 482380  | 0 | 3  | 5 | 0 | 9  | 11 | 2951240  | 9.76E-01 | 1 |
| PLP1     | 472103  | NaN  | 26  | 709864  | 206480  | 0 | 1  | 0 | 0 | 6  | 5  | 1299400  | 9.76E-01 | 1 |
| ZAP70    | 358719  | 582  | 36  | 1596660 | 441084  | 0 | 1  | 3 | 0 | 22 | 30 | 11620552 | 9.76E-01 | 1 |
| STK32B   | 66595   | 613  | 12  | 1103600 | 275188  | 0 | 11 | 2 | 0 | 0  | 2  | 275188   | 9.76E-01 | 1 |
| PRPF39   | 234083  | 565  | 14  | 1780712 | 421504  | 0 | 3  | 0 | 0 | 2  | 2  | 920972   | 9.76E-01 | 1 |
| RNF19B   | 858954  | 233  | 33  | 1868644 | 539696  | 0 | 2  | 0 | 0 | 26 | 25 | 9195480  | 9.76E-01 | 1 |
| ACACB    | 528828  | 519  | 29  | 6314016 | 1784628 | 0 | 16 | 6 | 0 | 19 | 26 | 8300496  | 9.76E-01 | 1 |
| PCDHGB2  | 662513  | 568  | 2   | 2290860 | 719832  | 0 | 3  | 3 | 0 | 50 | 85 | 24954176 | 9.76E-01 | 1 |
| CDC14A   | 387265  | 622  | 6   | 1665012 | 444288  | 0 | 2  | 1 | 0 | 50 | 65 | 19494204 | 9.76E-01 | 1 |
| DNAJC13  | 210456  | 538  | 14  | 5904616 | 1520120 | 0 | 20 | 9 | 0 | 5  | 16 | 3536504  | 9.76E-01 | 1 |
| FMNL1    | 798310  | 207  | 28  | 2812044 | 826632  | 0 | 5  | 4 | 0 | 50 | 80 | 24627368 | 9.76E-01 | 1 |
| GTPBP4   | 338115  | 407  | 30  | 1680320 | 424708  | 0 | 1  | 1 | 0 | 50 | 47 | 22055980 | 9.76E-01 | 1 |
| SLC34A2  | 218417  | 631  | 35  | 1755436 | 509792  | 0 | 3  | 2 | 0 | 32 | 32 | 9783236  | 9.76E-01 | 1 |
| SBF1     | 1028405 | 207  | 46  | 4771824 | 1467432 | 0 | 8  | 2 | 0 | 9  | 14 | 5484892  | 9.76E-01 | 1 |
| SMURF2   | 937631  | 151  | -8  | 1972952 | 503740  | 0 | 5  | 2 | 0 | 11 | 20 | 4990052  | 9.76E-01 | 1 |
| FURIN    | 833957  | 291  | 42  | 2001432 | 605556  | 0 | 6  | 5 | 0 | 9  | 26 | 5816328  | 9.76E-01 | 1 |
| C10orf90 | 122926  | 478  | -50 | 1770744 | 506232  | 0 | 10 | 5 | 0 | 3  | 12 | 1438240  | 9.76E-01 | 1 |
| ZNF479   | 13773   | 995  | -29 | 1366684 | 332504  | 0 | 9  | 5 | 0 | 2  | 12 | 971524   | 9.76E-01 | 1 |
| ZCCHC4   | 233874  | 611  | 49  | 1368108 | 332148  | 0 | 1  | 1 | 0 | 50 | 54 | 18959492 | 9.76E-01 | 1 |

|          |         |      |     |         |         |   |    |   |   |    |    |          |          |   |
|----------|---------|------|-----|---------|---------|---|----|---|---|----|----|----------|----------|---|
| ULK3     | 764533  | 195  | 46  | 1225708 | 353864  | 0 | 1  | 1 | 0 | 50 | 66 | 21528032 | 9.76E-01 | 1 |
| TPCN2    | 729282  | 416  | 50  | 1942692 | 572448  | 0 | 3  | 3 | 0 | 50 | 81 | 23665100 | 9.76E-01 | 1 |
| IFT140   | 1366033 | 256  | 35  | 3762920 | 1048420 | 0 | 8  | 2 | 0 | 4  | 10 | 2737284  | 9.76E-01 | 1 |
| GATA5    | 1190564 | 205  | 22  | 975796  | 325028  | 0 | 2  | 1 | 0 | 4  | 4  | 1076544  | 9.76E-01 | 1 |
| DOCK10   | 123941  | 521  | 11  | 5776100 | 1466008 | 0 | 13 | 4 | 0 | 27 | 40 | 14668268 | 9.76E-01 | 1 |
| TSPAN10  | 3745109 | 205  | 30  | 846212  | 305092  | 0 | 1  | 2 | 0 | 14 | 15 | 3835188  | 9.76E-01 | 1 |
| ROCK2    | 495833  | 170  | 25  | 3715216 | 871844  | 0 | 14 | 3 | 0 | 5  | 7  | 1864016  | 9.76E-01 | 1 |
| MOGS     | 1069803 | 343  | 45  | 2012824 | 689216  | 0 | 3  | 3 | 0 | 50 | 68 | 19848780 | 9.77E-01 | 1 |
| ANO2     | 349024  | 712  | 13  | 2619804 | 689928  | 0 | 4  | 2 | 0 | 16 | 18 | 6469944  | 9.77E-01 | 1 |
| SOBP     | 288292  | 592  | 36  | 2150596 | 675332  | 0 | 1  | 0 | 0 | 6  | 7  | 2795312  | 9.77E-01 | 1 |
| RLTPR    | 1065785 | 147  | 41  | 3615536 | 1161628 | 0 | 7  | 3 | 0 | 6  | 12 | 4408348  | 9.77E-01 | 1 |
| OR2T6    | 104321  | 936  | -39 | 769316  | 220720  | 0 | 3  | 2 | 0 | 9  | 22 | 2442516  | 9.77E-01 | 1 |
| CYP26C1  | 558273  | 470  | 18  | 1251340 | 444644  | 0 | 1  | 3 | 0 | 50 | 65 | 19245716 | 9.77E-01 | 1 |
| HIST1H1A | 408919  | 685  | 43  | 524032  | 172304  | 0 | 1  | 0 | 0 | 1  | 1  | 411536   | 9.77E-01 | 1 |
| MURC     | 234309  | 702  | -21 | 928092  | 247776  | 0 | 1  | 2 | 0 | 10 | 9  | 2379148  | 9.77E-01 | 1 |
| LAMP1    | 815646  | 237  | 53  | 1059100 | 314348  | 0 | 1  | 3 | 0 | 15 | 22 | 5794968  | 9.77E-01 | 1 |
| FSD1     | 2122615 | 220  | 27  | 1289788 | 353864  | 0 | 1  | 2 | 0 | 50 | 78 | 23857340 | 9.77E-01 | 1 |
| PCDHGA3  | 662513  | 568  | 2   | 2322188 | 746176  | 0 | 10 | 5 | 0 | 7  | 35 | 5782152  | 9.77E-01 | 1 |
| KDM2A    | 1502318 | 162  | 42  | 2994316 | 817376  | 0 | 5  | 4 | 0 | 50 | 77 | 27193060 | 9.77E-01 | 1 |
| SMARCD2  | 1446139 | 380  | 27  | 1352444 | 403348  | 0 | 1  | 3 | 0 | 31 | 46 | 12420840 | 9.77E-01 | 1 |
| TEK      | 116738  | 387  | -28 | 2919556 | 778928  | 0 | 9  | 2 | 0 | 2  | 4  | 1575300  | 9.77E-01 | 1 |
| KLHDC8A  | 662921  | 249  | 41  | 874336  | 267356  | 0 | 1  | 2 | 0 | 8  | 16 | 3499480  | 9.77E-01 | 1 |
| ZXDA     | 42394   | NaN  | -21 | 1941980 | 621220  | 0 | 1  | 3 | 0 | 47 | 76 | 22268512 | 9.77E-01 | 1 |
| NUP54    | 525212  | 403  | 38  | 1314708 | 359916  | 0 | 1  | 2 | 0 | 50 | 70 | 20834544 | 9.77E-01 | 1 |
| MAL      | 171487  | 647  | -1  | 386972  | 121396  | 0 | 1  | 1 | 0 | 2  | 3  | 495196   | 9.77E-01 | 1 |
| ADAMTS1  | 89385   | 683  | -23 | 3148108 | 870776  | 0 | 11 | 9 | 0 | 6  | 13 | 1941980  | 9.77E-01 | 1 |
| MORC2    | 763716  | 303  | 37  | 2514072 | 695268  | 0 | 4  | 1 | 0 | 7  | 13 | 4508384  | 9.77E-01 | 1 |
| CACNA1E  | 111356  | 832  | 10  | 5844808 | 1627988 | 0 | 14 | 9 | 0 | 24 | 43 | 11138172 | 9.77E-01 | 1 |
| IDUA     | 675007  | 256  | 45  | 1625852 | 527236  | 0 | 1  | 0 | 0 | 5  | 6  | 3102896  | 9.77E-01 | 1 |
| ATG2A    | 3218288 | 209  | 61  | 4840888 | 1542548 | 0 | 8  | 7 | 0 | 50 | 89 | 25050652 | 9.77E-01 | 1 |
| TPPA     | 137738  | 789  | -12 | 709508  | 203632  | 0 | 1  | 1 | 0 | 2  | 5  | 731580   | 9.77E-01 | 1 |
| CTNNA3   | 14523   | 1168 | -41 | 2321832 | 621576  | 0 | 3  | 2 | 0 | 3  | 3  | 1385908  | 9.77E-01 | 1 |
| EZH1     | 1740597 | 177  | 36  | 1988972 | 488788  | 0 | 4  | 4 | 0 | 17 | 36 | 7482408  | 9.77E-01 | 1 |

|          |         |      |     |         |         |   |    |   |   |    |     |          |          |   |
|----------|---------|------|-----|---------|---------|---|----|---|---|----|-----|----------|----------|---|
| GART     | 896855  | 182  | 65  | 2591324 | 744040  | 0 | 4  | 1 | 0 | 2  | 1   | 1094700  | 9.77E-01 | 1 |
| NDST1    | 1109777 | 188  | 60  | 2238528 | 646140  | 0 | 2  | 4 | 0 | 18 | 15  | 6385572  | 9.77E-01 | 1 |
| CUL7     | 1239021 | 301  | 42  | 4479192 | 1348884 | 0 | 9  | 4 | 0 | 50 | 105 | 29539812 | 9.78E-01 | 1 |
| STAB2    | 907417  | 599  | 10  | 6689240 | 1777864 | 0 | 14 | 3 | 0 | 11 | 13  | 6274144  | 9.78E-01 | 1 |
| BBS1     | 1642783 | 194  | 56  | 1509796 | 463868  | 0 | 1  | 0 | 0 | 6  | 4   | 2325748  | 9.78E-01 | 1 |
| GPRIN1   | 579630  | 359  | 40  | 2397660 | 839448  | 0 | 2  | 0 | 0 | 11 | 9   | 4573176  | 9.78E-01 | 1 |
| MTSS1    | 481244  | 561  | 39  | 1915992 | 561768  | 0 | 3  | 3 | 0 | 50 | 73  | 21012900 | 9.78E-01 | 1 |
| TACR1    | 451907  | 644  | 9   | 1029552 | 296904  | 0 | 1  | 0 | 0 | 11 | 13  | 3810980  | 9.78E-01 | 1 |
| CKAP5    | 1075464 | 145  | 38  | 5278056 | 1419372 | 0 | 13 | 7 | 0 | 32 | 56  | 17907868 | 9.78E-01 | 1 |
| TMEM168  | 160383  | 814  | -16 | 1755792 | 493416  | 0 | 3  | 0 | 0 | 1  | 0   | 589536   | 9.78E-01 | 1 |
| UNC13A   | 1029781 | 246  | 37  | 4480972 | 1153796 | 0 | 8  | 3 | 0 | 33 | 30  | 11261704 | 9.78E-01 | 1 |
| LRP4     | 1227153 | 268  | 38  | 4934160 | 1330728 | 0 | 8  | 4 | 0 | 40 | 45  | 16842716 | 9.78E-01 | 1 |
| PEX6     | 1200368 | 259  | 40  | 2375232 | 838380  | 0 | 3  | 3 | 0 | 39 | 44  | 15846272 | 9.78E-01 | 1 |
| ZNF490   | 2001150 | 409  | -6  | 1380212 | 334996  | 0 | 1  | 2 | 0 | 50 | 65  | 22643380 | 9.78E-01 | 1 |
| LRP3     | 406033  | 270  | -8  | 1888936 | 609116  | 0 | 1  | 1 | 0 | 50 | 56  | 22286668 | 9.78E-01 | 1 |
| TGM6     | 611435  | 477  | 30  | 1800648 | 517980  | 0 | 2  | 2 | 0 | 5  | 10  | 2094348  | 9.78E-01 | 1 |
| SLC17A8  | 188107  | 693  | -3  | 1529020 | 408332  | 0 | 5  | 3 | 0 | 3  | 5   | 1050200  | 9.78E-01 | 1 |
| CYHR1    | 2043455 | 200  | 36  | 1168392 | 365256  | 0 | 2  | 2 | 0 | 2  | 13  | 2164836  | 9.78E-01 | 1 |
| TERF2    | 1197858 | 125  | 33  | 1281956 | 361696  | 0 | 3  | 2 | 0 | 13 | 27  | 5427932  | 9.78E-01 | 1 |
| GALNT10  | 557034  | 451  | 31  | 1553940 | 428268  | 0 | 1  | 0 | 0 | 50 | 57  | 22260324 | 9.78E-01 | 1 |
| SNX19    | 130522  | 523  | 7   | 2466012 | 758280  | 0 | 6  | 4 | 0 | 2  | 5   | 1513712  | 9.78E-01 | 1 |
| CTSZ     | 1009250 | 152  | 30  | 776436  | 218940  | 0 | 1  | 2 | 0 | 15 | 26  | 5327896  | 9.78E-01 | 1 |
| GALNT12  | 221241  | 164  | 17  | 1472772 | 430404  | 0 | 1  | 2 | 0 | 23 | 20  | 7447164  | 9.78E-01 | 1 |
| KIF2B    | 930     | 1125 | -86 | 1677828 | 481668  | 0 | 5  | 4 | 0 | 50 | 87  | 13483500 | 9.78E-01 | 1 |
| LARGE    | 31722   | 968  | -69 | 1949812 | 535424  | 0 | 5  | 1 | 0 | 8  | 24  | 4287664  | 9.78E-01 | 1 |
| PCDHA6   | 896676  | 606  | -12 | 2332868 | 744040  | 0 | 11 | 7 | 0 | 6  | 28  | 4240316  | 9.78E-01 | 1 |
| RNF34    | 650760  | 244  | 38  | 972236  | 260236  | 0 | 1  | 1 | 0 | 29 | 52  | 13287344 | 9.78E-01 | 1 |
| DUS3L    | 990266  | 225  | 26  | 1639380 | 501960  | 0 | 2  | 2 | 0 | 50 | 73  | 21365340 | 9.78E-01 | 1 |
| ACBD4    | 806811  | 207  | 32  | 1009616 | 156640  | 0 | 1  | 2 | 0 | 6  | 3   | 1157000  | 9.78E-01 | 1 |
| ZNF780B  | 1181917 | 521  | 22  | 2170888 | 518336  | 0 | 3  | 2 | 0 | 50 | 77  | 22919280 | 9.78E-01 | 1 |
| C12orf29 | 152325  | 507  | -27 | 864012  | 206124  | 0 | 1  | 0 | 0 | 50 | 109 | 24231496 | 9.78E-01 | 1 |
| OSBPL1A  | 150936  | 360  | 35  | 2545044 | 617304  | 0 | 4  | 0 | 0 | 11 | 13  | 4596316  | 9.78E-01 | 1 |
| TAF1     | 729010  | NaN  | 32  | 4954096 | 1274480 | 0 | 7  | 2 | 0 | 5  | 6   | 3201864  | 9.78E-01 | 1 |

|          |         |      |     |         |         |   |    |    |   |    |    |          |          |   |
|----------|---------|------|-----|---------|---------|---|----|----|---|----|----|----------|----------|---|
| TEP1     | 415850  | 401  | -7  | 6625516 | 2025284 | 0 | 14 | 10 | 0 | 5  | 16 | 4430420  | 9.78E-01 | 1 |
| ZNF598   | 1747301 | 183  | 46  | 2244580 | 706304  | 0 | 3  | 1  | 0 | 1  | 1  | 857604   | 9.78E-01 | 1 |
| CIITA    | 299383  | 410  | 38  | 2822012 | 882880  | 0 | 5  | 4  | 0 | 43 | 56 | 17455748 | 9.78E-01 | 1 |
| TCF20    | 1257937 | 305  | 43  | 4893220 | 1428272 | 0 | 12 | 5  | 0 | 13 | 33 | 8750124  | 9.78E-01 | 1 |
| GPR35    | 837485  | 485  | 35  | 736208  | 257032  | 0 | 1  | 3  | 0 | 3  | 6  | 1495912  | 9.78E-01 | 1 |
| SIAH2    | 348288  | 544  | 27  | 798152  | 247420  | 0 | 2  | 2  | 0 | 3  | 6  | 1243152  | 9.78E-01 | 1 |
| PLCZ1    | 82407   | 911  | -29 | 1615528 | 393380  | 0 | 5  | 2  | 0 | 50 | 88 | 17017156 | 9.78E-01 | 1 |
| MAP1A    | 794398  | 269  | 37  | 6875784 | 2116776 | 0 | 15 | 4  | 0 | 10 | 21 | 7868312  | 9.78E-01 | 1 |
| LYPD6B   | 132203  | 698  | -3  | 553224  | 138840  | 0 | 1  | 2  | 0 | 2  | 4  | 821648   | 9.78E-01 | 1 |
| PLOD1    | 518604  | 207  | 41  | 1885732 | 525812  | 0 | 2  | 2  | 0 | 50 | 50 | 16403768 | 9.78E-01 | 1 |
| SERINC3  | 781823  | 276  | 46  | 1223572 | 337844  | 0 | 9  | 4  | 0 | 3  | 10 | 1219300  | 9.78E-01 | 1 |
| GRIA3    | 226353  | NaN  | -6  | 2417596 | 641156  | 0 | 5  | 0  | 0 | 0  | 0  | 641156   | 9.78E-01 | 1 |
| DPY19L2  | 195841  | 681  | -28 | 1996092 | 525456  | 0 | 6  | 1  | 0 | 18 | 43 | 10534040 | 9.78E-01 | 1 |
| GLIS2    | 944378  | 161  | 33  | 1277684 | 427912  | 0 | 1  | 1  | 0 | 37 | 46 | 14908212 | 9.78E-01 | 1 |
| PNPLA7   | 1453700 | 213  | 35  | 3421516 | 1026704 | 0 | 7  | 2  | 0 | 6  | 6  | 2500188  | 9.79E-01 | 1 |
| ZMYM5    | 314256  | 363  | 44  | 1828060 | 462800  | 0 | 3  | 0  | 0 | 8  | 9  | 2877192  | 9.79E-01 | 1 |
| AGPAT6   | 365713  | 496  | 30  | 1191888 | 319332  | 0 | 2  | 1  | 0 | 18 | 28 | 7972976  | 9.79E-01 | 1 |
| DICER1   | 215900  | 674  | 16  | 4955520 | 1316844 | 0 | 14 | 4  | 0 | 20 | 17 | 5995752  | 9.79E-01 | 1 |
| MAPK8IP2 | 1073094 | 203  | 43  | 2087584 | 695624  | 0 | 2  | 0  | 0 | 1  | 2  | 1119976  | 9.79E-01 | 1 |
| RHOXF2B  | 800534  | NaN  | 23  | 1478824 | 398720  | 0 | 1  | 0  | 0 | 50 | 70 | 25377104 | 9.79E-01 | 1 |
| TPPP3    | 1115833 | 153  | 42  | 457104  | 122820  | 0 | 1  | 2  | 0 | 2  | 6  | 841940   | 9.79E-01 | 1 |
| FCRL5    | 234921  | 764  | 25  | 2453196 | 748668  | 0 | 5  | 4  | 0 | 50 | 65 | 18961628 | 9.79E-01 | 1 |
| USP44    | 442533  | 328  | 13  | 1821296 | 484516  | 0 | 1  | 0  | 0 | 4  | 3  | 2248140  | 9.79E-01 | 1 |
| VNN2     | 127166  | 569  | 2   | 1325032 | 372020  | 0 | 1  | 3  | 0 | 16 | 14 | 4555732  | 9.79E-01 | 1 |
| E2F1     | 710350  | 161  | 55  | 1075832 | 353152  | 0 | 1  | 2  | 0 | 50 | 88 | 20870500 | 9.79E-01 | 1 |
| CNTNAP1  | 1740597 | 177  | 36  | 3495208 | 1040588 | 0 | 8  | 5  | 0 | 17 | 36 | 7482408  | 9.79E-01 | 1 |
| ZNF468   | 557083  | 1008 | -39 | 1357072 | 331436  | 0 | 6  | 1  | 0 | 1  | 4  | 745464   | 9.79E-01 | 1 |
| ARFGEF2  | 808420  | 174  | 49  | 4671432 | 1213248 | 0 | 14 | 5  | 0 | 11 | 18 | 5035976  | 9.79E-01 | 1 |
| PDZD8    | 203138  | 607  | 5   | 2862596 | 855112  | 0 | 5  | 2  | 0 | 7  | 7  | 2981500  | 9.79E-01 | 1 |
| FBXO11   | 486669  | 587  | 27  | 2525108 | 636172  | 0 | 6  | 1  | 0 | 2  | 1  | 756856   | 9.79E-01 | 1 |
| LGI4     | 745516  | 357  | -9  | 1320760 | 437168  | 0 | 3  | 0  | 0 | 0  | 0  | 437168   | 9.79E-01 | 1 |
| CLSTN3   | 1872466 | 224  | 33  | 2441448 | 697404  | 0 | 4  | 1  | 0 | 26 | 35 | 10588864 | 9.79E-01 | 1 |
| LPA      | 287006  | 545  | -24 | 5240676 | 1465296 | 0 | 16 | 2  | 0 | 3  | 8  | 2642588  | 9.79E-01 | 1 |

|         |         |      |     |         |         |   |    |   |   |    |     |          |          |   |
|---------|---------|------|-----|---------|---------|---|----|---|---|----|-----|----------|----------|---|
| EPHA4   | 54488   | 1025 | 5   | 2541484 | 691352  | 0 | 2  | 1 | 0 | 2  | 4   | 1526884  | 9.79E-01 | 1 |
| PHC2    | 668735  | 413  | 31  | 2145256 | 664652  | 0 | 4  | 0 | 0 | 2  | 4   | 1569960  | 9.79E-01 | 1 |
| ATRNL1  | 45264   | 1002 | -20 | 3624080 | 917056  | 0 | 8  | 2 | 0 | 9  | 14  | 4617676  | 9.79E-01 | 1 |
| HEATR6  | 972352  | 235  | 18  | 2993960 | 876472  | 0 | 6  | 4 | 0 | 27 | 31  | 10094024 | 9.79E-01 | 1 |
| RPS6KA1 | 901637  | 184  | 32  | 2015316 | 580992  | 0 | 5  | 1 | 0 | 1  | 1   | 762196   | 9.79E-01 | 1 |
| SCARF1  | 1361271 | 198  | 27  | 2137780 | 569600  | 0 | 3  | 0 | 0 | 9  | 20  | 5743704  | 9.79E-01 | 1 |
| ABCC6   | 385823  | 188  | 23  | 3815252 | 1218232 | 0 | 6  | 4 | 0 | 29 | 38  | 14579624 | 9.79E-01 | 1 |
| GOLGA8B | NaN     | NaN  | NaN | 1582776 | 416520  | 0 | 1  | 0 | 0 | 50 | 116 | 40062104 | 9.79E-01 | 1 |
| FZD8    | 144247  | 708  | -26 | 1663944 | 564972  | 0 | 3  | 2 | 0 | 37 | 58  | 16508076 | 9.79E-01 | 1 |
| ZBBX    | 69051   | 928  | -23 | 2136356 | 506944  | 0 | 5  | 2 | 0 | 46 | 76  | 19312644 | 9.79E-01 | 1 |
| FSD2    | 490130  | 631  | 17  | 1953372 | 503028  | 0 | 5  | 2 | 0 | 50 | 74  | 19009688 | 9.79E-01 | 1 |
| CCDC61  | 931670  | 261  | 36  | 1347104 | 417232  | 0 | 1  | 0 | 0 | 4  | 4   | 1800292  | 9.79E-01 | 1 |
| MYO15A  | 911350  | 192  | 29  | 8869740 | 2712720 | 0 | 19 | 8 | 0 | 25 | 50  | 15465352 | 9.79E-01 | 1 |
| FOXD2   | 190214  | 478  | 16  | 1153796 | 435388  | 0 | 1  | 0 | 0 | 5  | 9   | 3000368  | 9.79E-01 | 1 |
| RGPD2   | 177375  | 633  | 3   | 9065896 | 2385200 | 0 | 5  | 0 | 0 | 0  | 0   | 2385200  | 9.79E-01 | 1 |
| MLPH    | 468096  | 440  | 11  | 1549312 | 440372  | 0 | 3  | 0 | 0 | 1  | 3   | 1150948  | 9.79E-01 | 1 |
| USHBP1  | 865138  | 212  | 38  | 1752588 | 554292  | 0 | 2  | 2 | 0 | 50 | 59  | 18864796 | 9.79E-01 | 1 |
| PIWIL3  | 399624  | 395  | -4  | 2303676 | 610896  | 0 | 4  | 2 | 0 | 16 | 25  | 7548980  | 9.79E-01 | 1 |
| MRPL39  | 533414  | 822  | 75  | 975440  | 252760  | 0 | 2  | 2 | 0 | 3  | 4   | 1064796  | 9.80E-01 | 1 |
| IFNGR1  | 117339  | 309  | 35  | 1259172 | 337488  | 0 | 1  | 2 | 0 | 50 | 65  | 19546536 | 9.80E-01 | 1 |
| HTR1E   | 169399  | 752  | -17 | 902460  | 270204  | 0 | 1  | 3 | 0 | 8  | 12  | 2471708  | 9.80E-01 | 1 |
| NSUN5   | 902769  | 422  | 52  | 1204704 | 352440  | 0 | 1  | 1 | 0 | 50 | 86  | 23744844 | 9.80E-01 | 1 |
| SLC2A11 | 643596  | 182  | 57  | 1312928 | 414028  | 0 | 1  | 0 | 0 | 50 | 84  | 21648360 | 9.80E-01 | 1 |
| PDPK1   | 2083323 | 321  | 42  | 1451768 | 388396  | 0 | 2  | 0 | 0 | 50 | 76  | 19852696 | 9.80E-01 | 1 |
| SLC36A3 | 871795  | 530  | 57  | 1306876 | 376292  | 0 | 4  | 3 | 0 | 4  | 12  | 1804564  | 9.80E-01 | 1 |
| ADAMTS1 | 38096   | 1075 | -16 | 3124612 | 839804  | 0 | 5  | 5 | 0 | 20 | 31  | 8975472  | 9.80E-01 | 1 |
| POLL    | 843302  | 421  | 19  | 1443580 | 436100  | 0 | 1  | 1 | 0 | 50 | 65  | 21446508 | 9.80E-01 | 1 |
| CRB2    | 346407  | 389  | 44  | 3128172 | 1045572 | 0 | 3  | 3 | 0 | 29 | 30  | 13297668 | 9.80E-01 | 1 |
| LRP2BP  | 224125  | 422  | 25  | 915632  | 229264  | 0 | 1  | 0 | 0 | 2  | 2   | 919548   | 9.80E-01 | 1 |
| ZYG11B  | 652910  | 232  | 28  | 1918840 | 523676  | 0 | 6  | 2 | 0 | 17 | 41  | 8399820  | 9.80E-01 | 1 |
| SMTN    | 726734  | 202  | 32  | 2417596 | 766112  | 0 | 2  | 1 | 0 | 10 | 12  | 5233912  | 9.80E-01 | 1 |
| XKR5    | 131291  | 564  | 40  | 1709868 | 517980  | 0 | 1  | 0 | 0 | 14 | 10  | 4934872  | 9.80E-01 | 1 |
| MKL1    | 578345  | 228  | 55  | 2297980 | 739412  | 0 | 3  | 1 | 0 | 25 | 38  | 12633372 | 9.80E-01 | 1 |

|          |         |     |     |         |         |   |    |   |   |    |     |          |          |   |
|----------|---------|-----|-----|---------|---------|---|----|---|---|----|-----|----------|----------|---|
| NOLC1    | 1041024 | 187 | 45  | 1804564 | 489500  | 0 | 3  | 0 | 0 | 1  | 1   | 671416   | 9.80E-01 | 1 |
| ZW10     | 148947  | 534 | 4   | 2037744 | 527592  | 0 | 1  | 2 | 0 | 42 | 34  | 13987240 | 9.80E-01 | 1 |
| AKNA     | 218424  | 360 | 14  | 3572816 | 1126384 | 0 | 8  | 1 | 0 | 1  | 4   | 1677472  | 9.80E-01 | 1 |
| PIGT     | 1037999 | 382 | 35  | 1453548 | 450696  | 0 | 2  | 4 | 0 | 50 | 68  | 17427980 | 9.80E-01 | 1 |
| IL20     | 467839  | 385 | 39  | 462444  | 123888  | 0 | 1  | 2 | 0 | 5  | 11  | 1456752  | 9.80E-01 | 1 |
| PDZD7    | 1020226 | 247 | 40  | 1283736 | 410112  | 0 | 1  | 0 | 0 | 35 | 46  | 14845556 | 9.80E-01 | 1 |
| GPR78    | 96216   | 471 | 31  | 855824  | 318976  | 0 | 1  | 4 | 0 | 7  | 9   | 2233900  | 9.80E-01 | 1 |
| EPPK1    | 2376841 | 247 | 22  | 5780372 | 1978648 | 0 | 9  | 7 | 0 | 50 | 67  | 29170640 | 9.80E-01 | 1 |
| JAKMIP1  | 366026  | 678 | 41  | 2226780 | 600216  | 0 | 4  | 3 | 0 | 6  | 9   | 3068008  | 9.80E-01 | 1 |
| UNC5A    | 1056724 | 222 | 44  | 2119624 | 641156  | 0 | 2  | 2 | 0 | 50 | 61  | 21713864 | 9.80E-01 | 1 |
| KIF5C    | 87934   | 682 | 0   | 2477760 | 615168  | 0 | 4  | 0 | 0 | 2  | 0   | 706304   | 9.80E-01 | 1 |
| MED23    | 147816  | 864 | 7   | 3590972 | 943756  | 0 | 3  | 2 | 0 | 13 | 15  | 6244952  | 9.80E-01 | 1 |
| RGPD1    | NaN     | NaN | NaN | 9034568 | 2365264 | 0 | 3  | 0 | 0 | 0  | 0   | 2365264  | 9.80E-01 | 1 |
| C1QTNF9E | 314992  | 678 | 51  | 853332  | 226416  | 0 | 1  | 1 | 0 | 21 | 23  | 5433984  | 9.80E-01 | 1 |
| SMYD5    | 536944  | 452 | 20  | 1112144 | 283732  | 0 | 1  | 3 | 0 | 18 | 24  | 6456416  | 9.80E-01 | 1 |
| RADIL    | 1009587 | 523 | 13  | 2644012 | 863300  | 0 | 4  | 4 | 0 | 15 | 28  | 6816332  | 9.80E-01 | 1 |
| NCAPH    | 907236  | 316 | 46  | 1945184 | 506944  | 0 | 2  | 4 | 0 | 12 | 26  | 7976180  | 9.80E-01 | 1 |
| POLR3A   | 362530  | 184 | 31  | 3599160 | 985764  | 0 | 11 | 4 | 0 | 3  | 6   | 1604492  | 9.80E-01 | 1 |
| OCRL     | 330789  | NaN | 22  | 2392676 | 595588  | 0 | 2  | 1 | 0 | 50 | 55  | 24691448 | 9.80E-01 | 1 |
| TTC5     | 371637  | 528 | -29 | 1135284 | 318264  | 0 | 1  | 1 | 0 | 50 | 73  | 20208696 | 9.80E-01 | 1 |
| FCER1A   | 285980  | 737 | -6  | 679604  | 168388  | 0 | 3  | 2 | 0 | 2  | 5   | 650768   | 9.80E-01 | 1 |
| SRPK1    | 761613  | 404 | 28  | 1735500 | 430404  | 0 | 1  | 1 | 0 | 50 | 64  | 25956672 | 9.80E-01 | 1 |
| RFWD2    | 66809   | 929 | -3  | 1930944 | 495552  | 0 | 4  | 2 | 0 | 14 | 23  | 6387352  | 9.80E-01 | 1 |
| CDK11B   | 1569768 | 214 | 33  | 2109656 | 521896  | 0 | 2  | 0 | 0 | 3  | 2   | 1529020  | 9.80E-01 | 1 |
| C16orf86 | 1157184 | 136 | 50  | 777860  | 253828  | 0 | 3  | 0 | 0 | 0  | 0   | 253828   | 9.80E-01 | 1 |
| ATP2C1   | 313762  | 475 | 19  | 2596308 | 676044  | 0 | 3  | 2 | 0 | 11 | 13  | 5820244  | 9.81E-01 | 1 |
| ZNF703   | 587619  | 452 | 3   | 1383060 | 514776  | 0 | 1  | 1 | 0 | 30 | 32  | 11551488 | 9.81E-01 | 1 |
| TMEM37   | 203559  | 497 | 35  | 468140  | 150232  | 0 | 1  | 3 | 0 | 2  | 7   | 839448   | 9.81E-01 | 1 |
| ZNF408   | 965022  | 176 | 48  | 1790680 | 570668  | 0 | 2  | 1 | 0 | 6  | 7   | 1921332  | 9.81E-01 | 1 |
| ZNF652   | 748320  | 256 | 25  | 1563552 | 398364  | 0 | 2  | 1 | 0 | 7  | 14  | 4020308  | 9.81E-01 | 1 |
| OR2T1    | 104321  | 936 | -39 | 913140  | 271272  | 0 | 4  | 2 | 0 | 9  | 22  | 2442516  | 9.81E-01 | 1 |
| OPN1MW   | NaN     | NaN | NaN | 1859032 | 526880  | 0 | 1  | 1 | 0 | 50 | 117 | 40172464 | 9.81E-01 | 1 |
| FAM13B   | 992763  | 396 | 39  | 2514072 | 611964  | 0 | 6  | 1 | 0 | 3  | 4   | 1552872  | 9.81E-01 | 1 |



|         |         |      |     |         |         |   |   |   |   |    |     |          |          |   |
|---------|---------|------|-----|---------|---------|---|---|---|---|----|-----|----------|----------|---|
| OR2T34  | 116628  | 850  | -20 | 784980  | 237096  | 0 | 2 | 3 | 0 | 4  | 8   | 1241728  | 9.81E-01 | 1 |
| HSD17B2 | 192405  | 635  | 2   | 984696  | 277680  | 0 | 4 | 3 | 0 | 2  | 5   | 838024   | 9.81E-01 | 1 |
| TRAIP   | 1306720 | 191  | 39  | 1234964 | 330724  | 0 | 1 | 2 | 0 | 50 | 70  | 21778300 | 9.81E-01 | 1 |
| THBD    | 199022  | 554  | -50 | 1398368 | 447136  | 0 | 3 | 0 | 0 | 2  | 4   | 1281600  | 9.81E-01 | 1 |
| DDX31   | 1546589 | 581  | 42  | 2186552 | 631900  | 0 | 4 | 0 | 0 | 9  | 12  | 3932376  | 9.81E-01 | 1 |
| PDLIM7  | 1120311 | 347  | 41  | 1285516 | 361340  | 0 | 1 | 1 | 0 | 50 | 73  | 19933508 | 9.81E-01 | 1 |
| LMTK3   | 1500967 | 182  | 37  | 3587412 | 1250628 | 0 | 6 | 4 | 0 | 21 | 39  | 13236080 | 9.81E-01 | 1 |
| CCDC93  | 195266  | 578  | -2  | 1705240 | 417944  | 0 | 1 | 1 | 0 | 50 | 49  | 18798580 | 9.81E-01 | 1 |
| TSC2    | 1722112 | 181  | 44  | 4583856 | 1386264 | 0 | 9 | 9 | 0 | 21 | 31  | 8039548  | 9.81E-01 | 1 |
| PSMB10  | 879834  | 158  | 50  | 684944  | 227128  | 0 | 1 | 3 | 0 | 8  | 20  | 3682108  | 9.81E-01 | 1 |
| SLC33A1 | 284462  | 473  | 4   | 1376296 | 407264  | 0 | 2 | 3 | 0 | 14 | 27  | 7457844  | 9.81E-01 | 1 |
| TRIM4   | 1559879 | 391  | 36  | 1278040 | 352796  | 0 | 1 | 0 | 0 | 19 | 26  | 8437912  | 9.81E-01 | 1 |
| PLAG1   | 343641  | 552  | 19  | 1259172 | 350304  | 0 | 2 | 4 | 0 | 5  | 7   | 1375940  | 9.81E-01 | 1 |
| DHX40   | 1081217 | 417  | 25  | 2038812 | 532932  | 0 | 4 | 0 | 0 | 2  | 3   | 1081172  | 9.81E-01 | 1 |
| MAMLD1  | 311047  | NaN  | 16  | 2847644 | 855112  | 0 | 2 | 1 | 0 | 28 | 36  | 16012168 | 9.81E-01 | 1 |
| MMP14   | 1177534 | 225  | 34  | 1485944 | 420436  | 0 | 2 | 3 | 0 | 15 | 22  | 6086176  | 9.81E-01 | 1 |
| BCAN    | 1851672 | 180  | 37  | 2322188 | 732292  | 0 | 4 | 2 | 0 | 43 | 61  | 19959496 | 9.81E-01 | 1 |
| TEAD4   | 506329  | 267  | 35  | 1135284 | 305448  | 0 | 3 | 2 | 0 | 5  | 14  | 2426852  | 9.81E-01 | 1 |
| CLRN1   | 353086  | 635  | 10  | 635460  | 173016  | 0 | 3 | 3 | 0 | 1  | 7   | 854400   | 9.81E-01 | 1 |
| EPB41L1 | 1300256 | 235  | 50  | 2278400 | 637240  | 0 | 5 | 5 | 0 | 5  | 19  | 4169828  | 9.81E-01 | 1 |
| CHST1   | 160913  | 609  | 18  | 996800  | 327520  | 0 | 2 | 3 | 0 | 10 | 12  | 2584916  | 9.81E-01 | 1 |
| NR5A1   | 492584  | 353  | 24  | 1156288 | 349592  | 0 | 1 | 0 | 0 | 9  | 9   | 2987196  | 9.81E-01 | 1 |
| DCUN1D5 | 166625  | 585  | -9  | 646852  | 145604  | 0 | 2 | 1 | 0 | 3  | 6   | 917768   | 9.81E-01 | 1 |
| ZSWIM5  | 1015582 | 422  | 26  | 2954800 | 900680  | 0 | 9 | 2 | 0 | 0  | 2   | 900680   | 9.81E-01 | 1 |
| AKAP4   | 56301   | NaN  | 5   | 2188688 | 572092  | 0 | 2 | 3 | 0 | 20 | 23  | 9124992  | 9.81E-01 | 1 |
| FAM186B | 2227486 | 224  | 53  | 2269144 | 623000  | 0 | 4 | 0 | 0 | 4  | 10  | 2584560  | 9.81E-01 | 1 |
| DNAI1   | 811768  | 370  | 49  | 1859388 | 464580  | 0 | 4 | 3 | 0 | 18 | 33  | 8770060  | 9.82E-01 | 1 |
| TKTL2   | 74744   | 1164 | -26 | 1540768 | 468140  | 0 | 5 | 2 | 0 | 6  | 13  | 2391252  | 9.82E-01 | 1 |
| UGT2B4  | 18715   | 1044 | -22 | 1358140 | 360272  | 0 | 2 | 3 | 0 | 50 | 110 | 25751972 | 9.82E-01 | 1 |
| ZNF48   | 2338593 | 142  | 59  | 1509084 | 480600  | 0 | 1 | 2 | 0 | 50 | 74  | 22010768 | 9.82E-01 | 1 |
| TRMT11  | 142337  | 297  | 11  | 1230692 | 307228  | 0 | 2 | 3 | 0 | 17 | 29  | 6295504  | 9.82E-01 | 1 |
| RNF148  | 53042   | 1027 | 6   | 766112  | 214312  | 0 | 2 | 3 | 0 | 1  | 3   | 477752   | 9.82E-01 | 1 |
| NCDN    | 1049488 | 388  | 34  | 1769320 | 599504  | 0 | 3 | 1 | 0 | 14 | 17  | 4776096  | 9.82E-01 | 1 |

|          |         |     |     |          |         |   |    |    |   |    |     |          |          |   |
|----------|---------|-----|-----|----------|---------|---|----|----|---|----|-----|----------|----------|---|
| CAMK2B   | 1467518 | 412 | 65  | 1746180  | 492348  | 0 | 4  | 6  | 0 | 19 | 25  | 5655060  | 9.82E-01 | 1 |
| MAP7D3   | 314502  | NaN | 20  | 2319340  | 586688  | 0 | 2  | 1  | 0 | 31 | 33  | 12341096 | 9.82E-01 | 1 |
| USH2A    | 82180   | 967 | -25 | 13285920 | 3696348 | 0 | 34 | 7  | 0 | 2  | 8   | 4033836  | 9.82E-01 | 1 |
| SUOX     | 2080397 | 229 | 31  | 1335000  | 427200  | 0 | 1  | 3  | 0 | 7  | 8   | 2941984  | 9.82E-01 | 1 |
| C12orf60 | 340728  | 578 | -4  | 633680   | 158776  | 0 | 2  | 2  | 0 | 4  | 5   | 737988   | 9.82E-01 | 1 |
| PHF2     | 421433  | 612 | 29  | 2817028  | 787472  | 0 | 2  | 3  | 0 | 10 | 15  | 7918508  | 9.82E-01 | 1 |
| PAR3B    | 51582   | 973 | -1  | 3075484  | 882524  | 0 | 5  | 4  | 0 | 27 | 50  | 11997556 | 9.82E-01 | 1 |
| SLC38A4  | 518041  | 415 | -10 | 1434680  | 380920  | 0 | 1  | 0  | 0 | 28 | 37  | 13064844 | 9.82E-01 | 1 |
| ERI2     | 211686  | 580 | 23  | 2109656  | 535780  | 0 | 2  | 0  | 0 | 16 | 14  | 5815972  | 9.82E-01 | 1 |
| SHC3     | 207531  | 633 | 8   | 1506948  | 446424  | 0 | 1  | 1  | 0 | 50 | 57  | 22178088 | 9.82E-01 | 1 |
| AQR      | 468734  | 288 | -5  | 3896064  | 1010328 | 0 | 8  | 2  | 0 | 24 | 37  | 12202968 | 9.82E-01 | 1 |
| APOBEC3F | 1386387 | 372 | 71  | 1095412  | 274832  | 0 | 1  | 1  | 0 | 50 | 61  | 16059872 | 9.82E-01 | 1 |
| POTEM    | NaN     | NaN | NaN | 1347104  | 327520  | 0 | 1  | 1  | 0 | 50 | 117 | 39973104 | 9.82E-01 | 1 |
| CABLES1  | 270708  | 198 | 72  | 1621580  | 505876  | 0 | 1  | 2  | 0 | 26 | 42  | 14142812 | 9.82E-01 | 1 |
| SPTBN2   | 1432488 | 187 | 46  | 6025300  | 1789256 | 0 | 11 | 6  | 0 | 31 | 42  | 14892904 | 9.82E-01 | 1 |
| CSMD2    | 137660  | 907 | 16  | 8957316  | 2515140 | 0 | 30 | 13 | 0 | 9  | 23  | 5400876  | 9.82E-01 | 1 |
| LRRC56   | 1970020 | 236 | 42  | 1335000  | 451764  | 0 | 1  | 2  | 0 | 50 | 66  | 20259248 | 9.82E-01 | 1 |
| ZMYND11  | 223637  | 625 | 3   | 1634752  | 377360  | 0 | 1  | 1  | 0 | 10 | 7   | 3556796  | 9.82E-01 | 1 |
| DCDC2    | 362257  | 711 | -12 | 1338916  | 336776  | 0 | 1  | 2  | 0 | 50 | 65  | 19879396 | 9.82E-01 | 1 |
| LARP1    | 549658  | 179 | 27  | 2626212  | 720900  | 0 | 4  | 1  | 0 | 27 | 42  | 13622696 | 9.82E-01 | 1 |
| ATXN3L   | 295243  | NaN | 40  | 915988   | 224636  | 0 | 1  | 2  | 0 | 21 | 35  | 7221816  | 9.82E-01 | 1 |
| ANKRD36F | 390850  | 455 | 29  | 3648288  | 873624  | 0 | 2  | 1  | 0 | 43 | 33  | 21068436 | 9.82E-01 | 1 |
| RBM19    | 198554  | 673 | 11  | 2511936  | 669636  | 0 | 5  | 2  | 0 | 50 | 64  | 20156008 | 9.82E-01 | 1 |
| NFRSF10L | 633411  | 240 | 42  | 1191176  | 349948  | 0 | 4  | 2  | 0 | 1  | 2   | 598792   | 9.82E-01 | 1 |
| SCAPER   | 393531  | 675 | 22  | 3700620  | 956928  | 0 | 10 | 5  | 0 | 2  | 5   | 1723040  | 9.82E-01 | 1 |
| FAM129B  | 857814  | 182 | 46  | 1926316  | 543968  | 0 | 4  | 0  | 0 | 1  | 1   | 652192   | 9.82E-01 | 1 |
| SPAG9    | 1009546 | 138 | -3  | 3447148  | 912428  | 0 | 8  | 3  | 0 | 5  | 8   | 2186196  | 9.82E-01 | 1 |
| NBEAL1   | 478657  | 384 | 31  | 7047020  | 1814176 | 0 | 13 | 2  | 0 | 4  | 4   | 2650776  | 9.82E-01 | 1 |
| TRIM37   | 678139  | 530 | 13  | 2547536  | 648988  | 0 | 8  | 1  | 0 | 0  | 1   | 648988   | 9.82E-01 | 1 |
| TRIM26   | 1932849 | 486 | 48  | 1365972  | 389820  | 0 | 1  | 1  | 0 | 50 | 60  | 20279184 | 9.82E-01 | 1 |
| SLC9A3R2 | 1747301 | 183 | 46  | 843364   | 265220  | 0 | 1  | 0  | 0 | 1  | 0   | 416520   | 9.82E-01 | 1 |
| RGS14    | 942017  | 227 | 53  | 1429696  | 446780  | 0 | 5  | 1  | 0 | 6  | 8   | 1593456  | 9.82E-01 | 1 |
| TMPRSS3  | 339928  | 400 | 80  | 1247780  | 347812  | 0 | 1  | 2  | 0 | 47 | 54  | 17291276 | 9.82E-01 | 1 |

|          |         |      |     |         |         |   |    |   |   |    |     |          |          |   |
|----------|---------|------|-----|---------|---------|---|----|---|---|----|-----|----------|----------|---|
| PPARD    | 670775  | 267  | 35  | 1157356 | 310076  | 0 | 5  | 3 | 0 | 4  | 12  | 1621936  | 9.82E-01 | 1 |
| ZNF772   | 451095  | 869  | -24 | 1276616 | 310432  | 0 | 1  | 0 | 0 | 32 | 34  | 10625888 | 9.82E-01 | 1 |
| KRT76    | 1444461 | 422  | 38  | 1619800 | 463868  | 0 | 4  | 4 | 0 | 9  | 15  | 3373456  | 9.82E-01 | 1 |
| DNAJC2   | 375620  | 620  | 8   | 1676404 | 386972  | 0 | 2  | 2 | 0 | 50 | 70  | 20312292 | 9.83E-01 | 1 |
| DOK7     | 547964  | 412  | 46  | 1299400 | 346388  | 0 | 1  | 0 | 0 | 23 | 36  | 11802112 | 9.83E-01 | 1 |
| KCNH4    | 2129732 | 206  | 30  | 2514784 | 810968  | 0 | 4  | 4 | 0 | 15 | 27  | 8388428  | 9.83E-01 | 1 |
| FAM73A   | 368215  | 207  | 1   | 1665012 | 429336  | 0 | 1  | 3 | 0 | 11 | 14  | 6172684  | 9.83E-01 | 1 |
| TCOF1    | 949599  | 212  | 40  | 3759004 | 1147388 | 0 | 5  | 4 | 0 | 50 | 73  | 24033560 | 9.83E-01 | 1 |
| ALPK1    | 185655  | 467  | 42  | 3194744 | 858316  | 0 | 6  | 2 | 0 | 3  | 3   | 1700256  | 9.83E-01 | 1 |
| OR4C6    | 1295    | 1091 | -20 | 765400  | 225704  | 0 | 5  | 4 | 0 | 2  | 8   | 660736   | 9.83E-01 | 1 |
| ZNF185   | 235275  | NaN  | 23  | 1997872 | 565328  | 0 | 2  | 2 | 0 | 4  | 4   | 2053408  | 9.83E-01 | 1 |
| FES      | 833957  | 291  | 42  | 2105740 | 608048  | 0 | 3  | 2 | 0 | 50 | 63  | 21711728 | 9.83E-01 | 1 |
| TNKS1BP1 | 929334  | 250  | -20 | 4249216 | 1340696 | 0 | 8  | 5 | 0 | 6  | 11  | 3788908  | 9.83E-01 | 1 |
| XYLT1    | 30248   | 996  | -2  | 2405492 | 719476  | 0 | 6  | 5 | 0 | 50 | 74  | 17194800 | 9.83E-01 | 1 |
| NCLN     | 905626  | 241  | 30  | 1430052 | 436812  | 0 | 1  | 2 | 0 | 50 | 57  | 19345752 | 9.83E-01 | 1 |
| TRIM72   | 1203752 | 478  | 17  | 1175156 | 381988  | 0 | 1  | 2 | 0 | 50 | 54  | 16147804 | 9.83E-01 | 1 |
| TET3     | 1029946 | 250  | 44  | 4067300 | 1288720 | 0 | 8  | 3 | 0 | 8  | 12  | 4633696  | 9.83E-01 | 1 |
| FBXL19   | 1508459 | 247  | 46  | 1692068 | 577432  | 0 | 2  | 1 | 0 | 50 | 71  | 20582852 | 9.83E-01 | 1 |
| SP2      | 1127646 | 178  | 25  | 1515492 | 477396  | 0 | 2  | 3 | 0 | 34 | 49  | 12154196 | 9.83E-01 | 1 |
| NDNL2    | 242355  | 885  | -39 | 750804  | 226416  | 0 | 1  | 3 | 0 | 18 | 28  | 5264172  | 9.83E-01 | 1 |
| TMEM26   | 84084   | 468  | -19 | 926668  | 276968  | 0 | 4  | 3 | 0 | 1  | 4   | 457104   | 9.83E-01 | 1 |
| MPDZ     | 77490   | 688  | -36 | 5238184 | 1494488 | 0 | 15 | 3 | 0 | 3  | 7   | 2801008  | 9.83E-01 | 1 |
| COL20A1  | 1278630 | 332  | 62  | 3177656 | 1027060 | 0 | 4  | 4 | 0 | 50 | 61  | 17105444 | 9.83E-01 | 1 |
| CCDC64   | 1390014 | 218  | 43  | 1452124 | 423284  | 0 | 2  | 2 | 0 | 7  | 10  | 2923472  | 9.83E-01 | 1 |
| SLC41A3  | 210410  | 610  | 32  | 1512288 | 477396  | 0 | 2  | 0 | 0 | 1  | 1   | 607692   | 9.83E-01 | 1 |
| UNC5D    | 34554   | 1152 | -45 | 2455688 | 669280  | 0 | 6  | 6 | 0 | 10 | 17  | 4394820  | 9.83E-01 | 1 |
| VWF      | 1716132 | 481  | 15  | 7239972 | 1991820 | 0 | 15 | 4 | 0 | 7  | 15  | 6077276  | 9.83E-01 | 1 |
| DCAF8L2  | NaN     | NaN  | NaN | 1597016 | 432184  | 0 | 1  | 1 | 0 | 50 | 117 | 40077768 | 9.84E-01 | 1 |
| DAB2IP   | 448984  | 475  | 22  | 2920624 | 881456  | 0 | 5  | 1 | 0 | 6  | 8   | 3173740  | 9.84E-01 | 1 |
| CCDC149  | 280003  | 621  | 34  | 1377008 | 372376  | 0 | 2  | 1 | 0 | 16 | 18  | 4360644  | 9.84E-01 | 1 |
| CHN1     | 389626  | 701  | 12  | 1218944 | 306160  | 0 | 3  | 3 | 0 | 9  | 20  | 3810268  | 9.84E-01 | 1 |
| PRSS53   | 1347539 | 227  | 37  | 1382704 | 435032  | 0 | 1  | 0 | 0 | 50 | 69  | 22509168 | 9.84E-01 | 1 |
| CLCN5    | 75681   | NaN  | 26  | 2080108 | 588824  | 0 | 3  | 3 | 0 | 48 | 63  | 19445432 | 9.84E-01 | 1 |

|         |         |      |     |         |         |   |    |   |   |    |    |          |          |   |
|---------|---------|------|-----|---------|---------|---|----|---|---|----|----|----------|----------|---|
| GOLGA6A | 412657  | 344  | 49  | 1831620 | 466716  | 0 | 1  | 0 | 0 | 7  | 6  | 2794956  | 9.84E-01 | 1 |
| DLL4    | 1049616 | 176  | 50  | 1742620 | 498044  | 0 | 3  | 3 | 0 | 27 | 42 | 10668252 | 9.84E-01 | 1 |
| PLIN4   | 2111443 | 278  | 43  | 3225716 | 1146676 | 0 | 3  | 2 | 0 | 10 | 14 | 5030280  | 9.84E-01 | 1 |
| LRRK1   | 402246  | 363  | 12  | 5115364 | 1480604 | 0 | 10 | 4 | 0 | 5  | 8  | 4008204  | 9.84E-01 | 1 |
| GRIA2   | 44831   | 925  | -34 | 2389116 | 634392  | 0 | 8  | 5 | 0 | 21 | 43 | 6896788  | 9.84E-01 | 1 |
| NRF1    | 459189  | 253  | 32  | 1275548 | 385192  | 0 | 2  | 3 | 0 | 5  | 5  | 1521188  | 9.84E-01 | 1 |
| TMPRSS9 | 1553941 | 267  | 33  | 2615888 | 847636  | 0 | 5  | 3 | 0 | 36 | 43 | 12243908 | 9.84E-01 | 1 |
| B4GALT7 | 1316033 | 475  | 42  | 828768  | 245640  | 0 | 2  | 2 | 0 | 1  | 2  | 417588   | 9.84E-01 | 1 |
| SH3GL2  | 28189   | 392  | -31 | 931652  | 233536  | 0 | 1  | 1 | 0 | 35 | 62 | 12630880 | 9.84E-01 | 1 |
| PCDH10  | 9477    | 1355 | -31 | 2592748 | 821648  | 0 | 12 | 9 | 0 | 4  | 16 | 2154512  | 9.84E-01 | 1 |
| VASN    | 754886  | 161  | 41  | 1564976 | 598792  | 0 | 1  | 1 | 0 | 21 | 21 | 8108256  | 9.84E-01 | 1 |
| BCL3    | 812266  | 188  | -22 | 1104668 | 389464  | 0 | 1  | 1 | 0 | 8  | 17 | 4475632  | 9.84E-01 | 1 |
| WDR19   | 604829  | 230  | 49  | 3566764 | 890000  | 0 | 7  | 4 | 0 | 50 | 64 | 20686448 | 9.84E-01 | 1 |
| ATL3    | 1058363 | 170  | 50  | 1416880 | 370952  | 0 | 1  | 0 | 0 | 50 | 66 | 21187340 | 9.84E-01 | 1 |
| WHSC1   | 815091  | 239  | 43  | 3594176 | 949096  | 0 | 16 | 6 | 0 | 8  | 14 | 3011404  | 9.84E-01 | 1 |
| BAHCC1  | 3216151 | 268  | 24  | 6243172 | 2050916 | 0 | 7  | 2 | 0 | 0  | 2  | 2050916  | 9.84E-01 | 1 |
| NGF     | 537568  | 558  | 6   | 597724  | 181916  | 0 | 2  | 2 | 0 | 2  | 6  | 734784   | 9.84E-01 | 1 |
| CRYL1   | 346767  | 584  | 28  | 834108  | 223212  | 0 | 2  | 3 | 0 | 3  | 6  | 1078680  | 9.84E-01 | 1 |
| SCLT1   | 98655   | 645  | 8   | 1857252 | 435744  | 0 | 3  | 0 | 0 | 10 | 19 | 5505540  | 9.84E-01 | 1 |
| NEURL4  | 1911735 | 206  | 36  | 3905676 | 1223928 | 0 | 8  | 6 | 0 | 50 | 69 | 22072000 | 9.84E-01 | 1 |
| UBE4A   | 963668  | 192  | 48  | 2800652 | 721612  | 0 | 6  | 1 | 0 | 2  | 1  | 927380   | 9.84E-01 | 1 |
| DNMT1   | 1702441 | 200  | 23  | 4271644 | 1131368 | 0 | 9  | 5 | 0 | 50 | 95 | 25984796 | 9.84E-01 | 1 |
| RTN3    | 1291649 | 168  | 46  | 2674628 | 748312  | 0 | 9  | 2 | 0 | 0  | 2  | 748312   | 9.84E-01 | 1 |
| DDX41   | 1120311 | 347  | 41  | 1623716 | 442864  | 0 | 2  | 1 | 0 | 50 | 73 | 19933508 | 9.84E-01 | 1 |
| CDH23   | 641879  | 524  | 41  | 8835208 | 2648996 | 0 | 14 | 5 | 0 | 4  | 7  | 4630136  | 9.84E-01 | 1 |
| NRM     | 2115149 | 171  | 41  | 635104  | 222500  | 0 | 2  | 2 | 0 | 1  | 4  | 637952   | 9.84E-01 | 1 |
| SF3B4   | 798975  | 560  | 17  | 1045572 | 339624  | 0 | 3  | 0 | 0 | 1  | 1  | 458528   | 9.84E-01 | 1 |
| ANP32A  | 437749  | 562  | 32  | 669992  | 156640  | 0 | 4  | 3 | 0 | 3  | 4  | 516556   | 9.84E-01 | 1 |
| TTC39B  | 237773  | 710  | -17 | 1818448 | 475616  | 0 | 3  | 1 | 0 | 1  | 1  | 550732   | 9.84E-01 | 1 |
| TSHZ3   | 8215    | 1022 | -74 | 2704532 | 768604  | 0 | 13 | 8 | 0 | 38 | 56 | 8770060  | 9.84E-01 | 1 |
| ZIC5    | 323784  | 500  | 35  | 1589540 | 542188  | 0 | 1  | 3 | 0 | 22 | 20 | 7687108  | 9.84E-01 | 1 |
| BNC1    | 206688  | 679  | 11  | 2522972 | 684232  | 0 | 4  | 4 | 0 | 40 | 58 | 16229684 | 9.84E-01 | 1 |
| SS18    | 167310  | 632  | 37  | 1129944 | 257388  | 0 | 1  | 1 | 0 | 50 | 62 | 16815660 | 9.84E-01 | 1 |

|          |         |      |     |         |         |   |    |   |   |    |    |          |          |   |
|----------|---------|------|-----|---------|---------|---|----|---|---|----|----|----------|----------|---|
| CLASP1   | 238179  | 612  | 21  | 4005356 | 1143472 | 0 | 10 | 3 | 0 | 2  | 4  | 1674624  | 9.84E-01 | 1 |
| TSGA10   | 504327  | 770  | 19  | 1856896 | 451052  | 0 | 2  | 0 | 0 | 12 | 9  | 4118564  | 9.84E-01 | 1 |
| PARP2    | 415850  | 401  | -7  | 1550024 | 387328  | 0 | 2  | 0 | 0 | 5  | 16 | 4430420  | 9.84E-01 | 1 |
| PRMT3    | 162124  | 694  | -1  | 1432900 | 335708  | 0 | 1  | 0 | 0 | 28 | 35 | 12313684 | 9.84E-01 | 1 |
| PDE2A    | 741790  | 193  | 55  | 2572812 | 680316  | 0 | 2  | 0 | 0 | 7  | 9  | 3320056  | 9.84E-01 | 1 |
| ZNF75D   | 255033  | NaN  | 36  | 1331084 | 323248  | 0 | 7  | 3 | 0 | 1  | 3  | 667500   | 9.85E-01 | 1 |
| USP32    | 913326  | 361  | 6   | 4192968 | 1090428 | 0 | 9  | 6 | 0 | 50 | 60 | 14447548 | 9.85E-01 | 1 |
| FBXL13   | 720636  | 510  | 30  | 1940556 | 492348  | 0 | 2  | 1 | 0 | 50 | 69 | 21619168 | 9.85E-01 | 1 |
| EML3     | 2695768 | 217  | 42  | 2254548 | 709152  | 0 | 3  | 2 | 0 | 17 | 27 | 9232504  | 9.85E-01 | 1 |
| CD300LG  | 1025836 | 241  | 19  | 933076  | 286580  | 0 | 1  | 0 | 0 | 9  | 14 | 3060176  | 9.85E-01 | 1 |
| CLIC6    | 284989  | 406  | 43  | 1703460 | 519048  | 0 | 1  | 2 | 0 | 50 | 65 | 23149612 | 9.85E-01 | 1 |
| SLC22A2  | 653647  | 326  | -9  | 1414032 | 410112  | 0 | 5  | 3 | 0 | 2  | 11 | 1543616  | 9.85E-01 | 1 |
| PDE4D    | 91124   | 682  | 10  | 2367756 | 640800  | 0 | 1  | 0 | 0 | 3  | 2  | 1340696  | 9.85E-01 | 1 |
| RSPH10B  | NaN     | NaN  | NaN | 4631916 | 1111788 | 0 | 4  | 0 | 0 | 0  | 0  | 1111788  | 9.85E-01 | 1 |
| SLC15A3  | 802735  | 546  | 56  | 1424000 | 472768  | 0 | 1  | 2 | 0 | 50 | 83 | 25238620 | 9.85E-01 | 1 |
| SRGAP2   | 472089  | 300  | 6   | 2550384 | 689928  | 0 | 4  | 0 | 0 | 0  | 0  | 689928   | 9.85E-01 | 1 |
| MGAT4C   | 15683   | 881  | -41 | 1234964 | 314704  | 0 | 3  | 2 | 0 | 2  | 4  | 1039876  | 9.85E-01 | 1 |
| HECW2    | 166718  | 447  | 13  | 4042024 | 1117484 | 0 | 11 | 7 | 0 | 13 | 20 | 6304760  | 9.85E-01 | 1 |
| ESPN     | 644193  | 198  | 33  | 2104316 | 686368  | 0 | 2  | 3 | 0 | 50 | 58 | 20455048 | 9.85E-01 | 1 |
| PCDHB16  | 915569  | 724  | -11 | 1876832 | 612676  | 0 | 12 | 5 | 0 | 1  | 11 | 1243508  | 9.85E-01 | 1 |
| HS6ST3   | 105227  | 954  | -3  | 1186192 | 332504  | 0 | 1  | 2 | 0 | 50 | 77 | 21022868 | 9.85E-01 | 1 |
| ADCY4    | 906124  | 173  | 39  | 2717348 | 843364  | 0 | 4  | 3 | 0 | 50 | 64 | 20790400 | 9.85E-01 | 1 |
| CNTNAP5  | 1260    | 1308 | -14 | 3380932 | 904952  | 0 | 12 | 6 | 0 | 2  | 8  | 1703460  | 9.85E-01 | 1 |
| FAS      | 187494  | 375  | 39  | 899612  | 215380  | 0 | 1  | 2 | 0 | 4  | 5  | 1278396  | 9.85E-01 | 1 |
| RASAL3   | 524410  | 481  | 33  | 2483456 | 831616  | 0 | 4  | 2 | 0 | 9  | 22 | 7155956  | 9.85E-01 | 1 |
| RHOJ     | 143550  | 637  | -13 | 561412  | 144536  | 0 | 1  | 1 | 0 | 2  | 2  | 522608   | 9.85E-01 | 1 |
| CDK5RAP1 | 464431  | 395  | 39  | 1519052 | 420436  | 0 | 5  | 4 | 0 | 7  | 14 | 2542196  | 9.85E-01 | 1 |
| MEM150A  | 1158965 | 170  | 43  | 686724  | 210396  | 0 | 1  | 2 | 0 | 7  | 8  | 1535784  | 9.85E-01 | 1 |
| NECAB3   | 710350  | 161  | 55  | 1023856 | 295124  | 0 | 1  | 0 | 0 | 23 | 40 | 8652580  | 9.85E-01 | 1 |
| TRPM2    | 1023429 | 308  | 54  | 3867940 | 1085444 | 0 | 10 | 5 | 0 | 46 | 61 | 17048128 | 9.85E-01 | 1 |
| ILF3     | 2128709 | 224  | 33  | 2359568 | 674620  | 0 | 5  | 2 | 0 | 1  | 2  | 881812   | 9.85E-01 | 1 |
| FERMT2   | 309280  | 188  | 12  | 1829484 | 451764  | 0 | 1  | 2 | 0 | 50 | 40 | 18195516 | 9.85E-01 | 1 |
| NCAPG2   | 267997  | 565  | -31 | 3000368 | 780352  | 0 | 2  | 1 | 0 | 19 | 33 | 8965860  | 9.85E-01 | 1 |

|          |         |      |     |         |         |   |    |   |   |    |     |          |          |   |
|----------|---------|------|-----|---------|---------|---|----|---|---|----|-----|----------|----------|---|
| TMEM2    | 235852  | 312  | -7  | 3561424 | 971168  | 0 | 4  | 3 | 0 | 50 | 53  | 22425152 | 9.85E-01 | 1 |
| LLGL1    | 925111  | 223  | 18  | 2672136 | 835176  | 0 | 3  | 2 | 0 | 37 | 44  | 15624484 | 9.85E-01 | 1 |
| CHRNA2   | 326685  | 448  | 42  | 1320048 | 399432  | 0 | 5  | 2 | 0 | 2  | 5   | 803136   | 9.85E-01 | 1 |
| ACAD10   | 599161  | 203  | 33  | 2778580 | 806696  | 0 | 6  | 4 | 0 | 9  | 17  | 4747972  | 9.85E-01 | 1 |
| LRRTM4   | 7531    | 1175 | -21 | 1493064 | 413316  | 0 | 6  | 4 | 0 | 1  | 4   | 726596   | 9.86E-01 | 1 |
| ZNF512B  | 1154675 | 189  | 42  | 2254548 | 674976  | 0 | 1  | 2 | 0 | 17 | 20  | 6007856  | 9.86E-01 | 1 |
| TAP2     | 1313279 | 295  | 31  | 1764692 | 572092  | 0 | 1  | 0 | 0 | 11 | 14  | 5772540  | 9.86E-01 | 1 |
| ZNF221   | 464210  | 419  | -38 | 1616240 | 380920  | 0 | 4  | 0 | 0 | 1  | 2   | 817732   | 9.86E-01 | 1 |
| CDYL2    | 161731  | 507  | -16 | 1286584 | 363476  | 0 | 1  | 2 | 0 | 17 | 25  | 6797820  | 9.86E-01 | 1 |
| APAF1    | 488214  | 461  | 11  | 3298696 | 814172  | 0 | 6  | 1 | 0 | 0  | 1   | 814172   | 9.86E-01 | 1 |
| PKD2L1   | 1071291 | 198  | 56  | 2072276 | 574228  | 0 | 10 | 2 | 0 | 0  | 2   | 574228   | 9.86E-01 | 1 |
| MAP2K6   | 58848   | 397  | -42 | 890000  | 230332  | 0 | 1  | 2 | 0 | 6  | 11  | 2529024  | 9.86E-01 | 1 |
| PLCB4    | 77680   | 715  | -57 | 3267012 | 758280  | 0 | 8  | 2 | 0 | 20 | 51  | 13352136 | 9.86E-01 | 1 |
| WDR90    | 1161748 | 194  | 36  | 4396956 | 1379856 | 0 | 6  | 5 | 0 | 14 | 16  | 6811704  | 9.86E-01 | 1 |
| SEMA4D   | 163051  | 596  | 34  | 2667864 | 759348  | 0 | 2  | 0 | 0 | 23 | 21  | 9825956  | 9.86E-01 | 1 |
| SLC44A1  | 265154  | 490  | 0   | 1699544 | 472768  | 0 | 1  | 1 | 0 | 50 | 57  | 23594968 | 9.86E-01 | 1 |
| ZSWIM3   | 734138  | 136  | 53  | 1746180 | 491280  | 0 | 3  | 2 | 0 | 50 | 87  | 20836324 | 9.86E-01 | 1 |
| PIK3R5   | 359348  | 636  | 10  | 2218236 | 681384  | 0 | 3  | 4 | 0 | 50 | 67  | 20081604 | 9.86E-01 | 1 |
| QRICH2   | 1650351 | 209  | 21  | 4157724 | 1250628 | 0 | 10 | 5 | 0 | 28 | 67  | 17270984 | 9.86E-01 | 1 |
| TTC38    | 519654  | 205  | 31  | 1224996 | 338556  | 0 | 1  | 0 | 0 | 43 | 59  | 16573224 | 9.86E-01 | 1 |
| ADAM15   | 1696720 | 214  | 44  | 2216812 | 647564  | 0 | 7  | 1 | 0 | 0  | 1   | 647564   | 9.86E-01 | 1 |
| DYRK3    | 491162  | 261  | 34  | 1498760 | 421504  | 0 | 1  | 2 | 0 | 34 | 54  | 15229324 | 9.86E-01 | 1 |
| GFPT2    | 1453124 | 362  | 19  | 1785340 | 482024  | 0 | 5  | 4 | 0 | 5  | 25  | 5384500  | 9.86E-01 | 1 |
| CACNG4   | 293409  | 491  | -23 | 822004  | 243860  | 0 | 3  | 4 | 0 | 5  | 12  | 1555008  | 9.86E-01 | 1 |
| ZNF573   | 623089  | 829  | -44 | 1843724 | 440728  | 0 | 2  | 1 | 0 | 4  | 7   | 1831264  | 9.86E-01 | 1 |
| SLC6A13  | 316827  | 557  | 28  | 1555008 | 436812  | 0 | 2  | 2 | 0 | 33 | 45  | 12576056 | 9.86E-01 | 1 |
| C10orf88 | 282374  | 619  | 13  | 1138844 | 311500  | 0 | 4  | 2 | 0 | 9  | 18  | 2581356  | 9.86E-01 | 1 |
| LONRF1   | 119955  | 694  | 3   | 1959068 | 569956  | 0 | 2  | 1 | 0 | 2  | 1   | 1004276  | 9.86E-01 | 1 |
| IGSF22   | 616892  | 562  | 25  | 3399444 | 946248  | 0 | 6  | 1 | 0 | 8  | 12  | 4953384  | 9.86E-01 | 1 |
| CNBD1    | 148474  | 1191 | -31 | 1170172 | 276968  | 0 | 5  | 4 | 0 | 2  | 7   | 1064796  | 9.86E-01 | 1 |
| DOCK11   | 207684  | NaN  | 38  | 5497708 | 1371668 | 0 | 7  | 1 | 0 | 1  | 2   | 1593100  | 9.86E-01 | 1 |
| KLHL34   | 93001   | NaN  | 7   | 1531156 | 535424  | 0 | 2  | 3 | 0 | 17 | 26  | 6913876  | 9.86E-01 | 1 |
| KIR3DL2  | 987531  | 620  | -23 | 1159136 | 338200  | 0 | 2  | 2 | 0 | 50 | 135 | 24266740 | 9.86E-01 | 1 |

|          |         |     |     |         |         |   |    |    |   |    |    |          |          |   |
|----------|---------|-----|-----|---------|---------|---|----|----|---|----|----|----------|----------|---|
| ACTN4    | 1596646 | 322 | 36  | 2393388 | 616236  | 0 | 9  | 1  | 0 | 0  | 1  | 616236   | 9.86E-01 | 1 |
| CDC23    | 1127160 | 314 | 50  | 1571384 | 410824  | 0 | 1  | 1  | 0 | 50 | 62 | 19912860 | 9.86E-01 | 1 |
| CBWD3    | 114607  | 887 | -9  | 2134932 | 523320  | 0 | 1  | 0  | 0 | 17 | 37 | 15510564 | 9.86E-01 | 1 |
| RTN4RL1  | 1445978 | 224 | 22  | 1076544 | 346032  | 0 | 1  | 0  | 0 | 4  | 4  | 1288720  | 9.86E-01 | 1 |
| TUBGCP4  | 823006  | 415 | 50  | 1731584 | 478108  | 0 | 1  | 1  | 0 | 50 | 74 | 24588920 | 9.86E-01 | 1 |
| EPHA10   | 445060  | 375 | 30  | 2530804 | 810968  | 0 | 4  | 4  | 0 | 50 | 55 | 18360344 | 9.86E-01 | 1 |
| CABP5    | 993450  | 433 | 26  | 461732  | 117124  | 0 | 1  | 2  | 0 | 1  | 3  | 513708   | 9.86E-01 | 1 |
| IRAK3    | 239871  | 696 | 4   | 1563196 | 398720  | 0 | 6  | 1  | 0 | 1  | 1  | 509792   | 9.86E-01 | 1 |
| FASN     | 3850694 | 197 | 34  | 6251360 | 1976512 | 0 | 10 | 2  | 0 | 0  | 2  | 1976512  | 9.86E-01 | 1 |
| OR5T2    | 10209   | 969 | -40 | 892848  | 255252  | 0 | 1  | 0  | 0 | 50 | 99 | 20331516 | 9.86E-01 | 1 |
| SLITRK4  | 4706    | NaN | -30 | 2097196 | 592028  | 0 | 7  | 5  | 0 | 7  | 14 | 2985416  | 9.86E-01 | 1 |
| ZNF280D  | 229613  | 626 | 9   | 2676052 | 653972  | 0 | 2  | 1  | 0 | 34 | 39 | 16221140 | 9.86E-01 | 1 |
| SPACA3   | 286646  | 837 | -10 | 553224  | 160200  | 0 | 1  | 3  | 0 | 2  | 6  | 860452   | 9.86E-01 | 1 |
| KARS     | 449343  | 354 | 18  | 1694560 | 443576  | 0 | 9  | 4  | 0 | 4  | 8  | 1316844  | 9.86E-01 | 1 |
| DSCAML1  | 413931  | 624 | 44  | 5318284 | 1593812 | 0 | 13 | 5  | 0 | 50 | 60 | 18511288 | 9.86E-01 | 1 |
| PPARGC1E | 908037  | 285 | 49  | 2572812 | 762552  | 0 | 3  | 0  | 0 | 4  | 17 | 6737656  | 9.86E-01 | 1 |
| NCOA7    | 184468  | 179 | 18  | 2450348 | 635104  | 0 | 4  | 4  | 0 | 15 | 13 | 4244232  | 9.86E-01 | 1 |
| TCP11    | 625705  | 198 | 29  | 1368108 | 382344  | 0 | 1  | 2  | 0 | 50 | 50 | 15609888 | 9.86E-01 | 1 |
| ELFN2    | 969938  | 179 | 53  | 1992176 | 638308  | 0 | 3  | 3  | 0 | 50 | 63 | 19671848 | 9.86E-01 | 1 |
| MAP7D2   | 263236  | NaN | 38  | 1998228 | 550020  | 0 | 2  | 1  | 0 | 45 | 55 | 17959132 | 9.86E-01 | 1 |
| MSH3     | 319054  | 752 | 36  | 2954088 | 792456  | 0 | 3  | 2  | 0 | 50 | 51 | 20448996 | 9.86E-01 | 1 |
| TDRD9    | 694566  | 406 | 28  | 3619096 | 963692  | 0 | 4  | 3  | 0 | 37 | 43 | 14873324 | 9.87E-01 | 1 |
| CAPN11   | 1176811 | 216 | 49  | 1975800 | 491280  | 0 | 2  | 2  | 0 | 50 | 72 | 23213336 | 9.87E-01 | 1 |
| UBQLN4   | 2005405 | 213 | 39  | 1516560 | 457104  | 0 | 1  | 1  | 0 | 50 | 71 | 21768332 | 9.87E-01 | 1 |
| SLC36A1  | 736209  | 598 | 22  | 1209688 | 361340  | 0 | 1  | 3  | 0 | 5  | 21 | 6043456  | 9.87E-01 | 1 |
| CCDC157  | 696089  | 214 | 57  | 1880036 | 577432  | 0 | 2  | 0  | 0 | 7  | 10 | 3486308  | 9.87E-01 | 1 |
| DIS3     | 257535  | 685 | 2   | 2565692 | 669280  | 0 | 5  | 2  | 0 | 24 | 36 | 10307980 | 9.87E-01 | 1 |
| AVIL     | 1106109 | 238 | 40  | 2134932 | 571380  | 0 | 6  | 2  | 0 | 0  | 2  | 571380   | 9.87E-01 | 1 |
| IL17RB   | 475623  | 578 | 42  | 1305452 | 351016  | 0 | 1  | 0  | 0 | 50 | 71 | 20802860 | 9.87E-01 | 1 |
| CD248    | 2133752 | 236 | 53  | 1816668 | 614100  | 0 | 1  | 4  | 0 | 50 | 77 | 24481764 | 9.87E-01 | 1 |
| TARBP2   | 1590803 | 191 | 55  | 923464  | 286580  | 0 | 1  | 3  | 0 | 3  | 3  | 1044504  | 9.87E-01 | 1 |
| NAGS     | 920082  | 241 | 29  | 1306164 | 433608  | 0 | 1  | 0  | 0 | 16 | 24 | 6853000  | 9.87E-01 | 1 |
| SPEN     | 823686  | 169 | 28  | 9026736 | 2775732 | 0 | 25 | 11 | 0 | 11 | 23 | 6371688  | 9.87E-01 | 1 |

|          |         |      |     |         |         |   |    |    |   |    |     |          |          |   |
|----------|---------|------|-----|---------|---------|---|----|----|---|----|-----|----------|----------|---|
| ZC3H11A  | 521302  | 280  | 32  | 2085804 | 576720  | 0 | 2  | 0  | 0 | 50 | 57  | 19465368 | 9.87E-01 | 1 |
| PCDHGA1  | 662513  | 568  | 2   | 2329308 | 720900  | 0 | 9  | 10 | 0 | 6  | 33  | 5059116  | 9.87E-01 | 1 |
| THOC5    | 713942  | 190  | 39  | 1812396 | 460308  | 0 | 7  | 1  | 0 | 0  | 1   | 460308   | 9.87E-01 | 1 |
| NEK1     | 245919  | 399  | 12  | 3346400 | 828412  | 0 | 5  | 0  | 0 | 16 | 25  | 9024956  | 9.87E-01 | 1 |
| RASIP1   | 1635420 | 190  | 44  | 2321476 | 814172  | 0 | 4  | 3  | 0 | 50 | 73  | 21072352 | 9.87E-01 | 1 |
| GRIN3A   | 111816  | 1063 | -27 | 2798516 | 811324  | 0 | 5  | 3  | 0 | 50 | 146 | 30649820 | 9.87E-01 | 1 |
| PADI6    | 428762  | 210  | 31  | 1802784 | 489144  | 0 | 1  | 0  | 0 | 25 | 22  | 9346424  | 9.87E-01 | 1 |
| SLC25A22 | 1788356 | 193  | 48  | 811680  | 260592  | 0 | 1  | 0  | 0 | 3  | 4   | 1065864  | 9.87E-01 | 1 |
| NHSL2    | 623448  | NaN  | 41  | 3002504 | 953368  | 0 | 1  | 0  | 0 | 3  | 2   | 2712364  | 9.87E-01 | 1 |
| H3F3C    | 271605  | 394  | 20  | 328588  | 109292  | 0 | 1  | 2  | 0 | 1  | 3   | 343540   | 9.87E-01 | 1 |
| SLC22A6  | 2447828 | 398  | 48  | 1399792 | 445712  | 0 | 2  | 3  | 0 | 24 | 40  | 8624812  | 9.87E-01 | 1 |
| ARHGAP3  | 1151198 | 321  | 30  | 3129596 | 1082596 | 0 | 7  | 4  | 0 | 3  | 4   | 1745468  | 9.87E-01 | 1 |
| LRRC19   | 116568  | 447  | -12 | 957996  | 247776  | 0 | 2  | 1  | 0 | 1  | 2   | 624424   | 9.87E-01 | 1 |
| CFH      | 198896  | 941  | -26 | 3250992 | 803136  | 0 | 11 | 5  | 0 | 22 | 59  | 10777188 | 9.87E-01 | 1 |
| ITGB1    | 390742  | 205  | -15 | 2322188 | 553936  | 0 | 3  | 2  | 0 | 50 | 64  | 19593528 | 9.87E-01 | 1 |
| FOXA2    | 49625   | 627  | -66 | 1148456 | 342472  | 0 | 2  | 3  | 0 | 17 | 39  | 7383796  | 9.87E-01 | 1 |
| KRT1     | 1441383 | 464  | 29  | 1619088 | 483804  | 0 | 1  | 1  | 0 | 16 | 20  | 6903908  | 9.87E-01 | 1 |
| FLYWCH1  | 1490697 | 189  | 48  | 1773236 | 559276  | 0 | 1  | 0  | 0 | 43 | 47  | 17733784 | 9.87E-01 | 1 |
| UMODL1   | 220293  | 430  | 68  | 3636184 | 1089716 | 0 | 8  | 7  | 0 | 13 | 24  | 6173396  | 9.87E-01 | 1 |
| FO XK1   | 436950  | 446  | 18  | 1765404 | 622644  | 0 | 1  | 2  | 0 | 41 | 34  | 14098668 | 9.87E-01 | 1 |
| CILP     | 720558  | 183  | 57  | 2963700 | 862944  | 0 | 4  | 5  | 0 | 50 | 70  | 19785056 | 9.87E-01 | 1 |
| CHTF18   | 1187310 | 273  | 39  | 2439668 | 783556  | 0 | 4  | 4  | 0 | 32 | 39  | 12013220 | 9.87E-01 | 1 |
| HYOU1    | 1390854 | 195  | 58  | 2589188 | 721612  | 0 | 2  | 1  | 0 | 1  | 1   | 1295128  | 9.87E-01 | 1 |
| VPS11    | 1390854 | 195  | 58  | 2431124 | 652192  | 0 | 2  | 1  | 0 | 1  | 1   | 1225708  | 9.87E-01 | 1 |
| SENP6    | 428787  | 364  | 24  | 2949104 | 715204  | 0 | 3  | 0  | 0 | 0  | 0   | 715204   | 9.87E-01 | 1 |
| TSHZ1    | 69176   | 993  | 4   | 2564624 | 749380  | 0 | 3  | 3  | 0 | 50 | 64  | 23012908 | 9.87E-01 | 1 |
| GRIP2    | 501828  | 342  | 52  | 2864732 | 895696  | 0 | 6  | 1  | 0 | 0  | 1   | 895696   | 9.87E-01 | 1 |
| GPN1     | 1192074 | 306  | 43  | 1231404 | 322536  | 0 | 1  | 1  | 0 | 50 | 104 | 28814640 | 9.87E-01 | 1 |
| SPHK1    | 1622536 | 209  | 24  | 1181208 | 396228  | 0 | 1  | 0  | 0 | 5  | 13  | 3574596  | 9.88E-01 | 1 |
| ZDHHC13  | 194027  | 625  | 11  | 1644008 | 420436  | 0 | 1  | 0  | 0 | 3  | 1   | 1108584  | 9.88E-01 | 1 |
| PLBD1    | 339369  | 778  | 7   | 1439664 | 378072  | 0 | 1  | 0  | 0 | 50 | 74  | 23296640 | 9.88E-01 | 1 |
| CTSG     | 897577  | 582  | 3   | 640800  | 198648  | 0 | 3  | 3  | 0 | 3  | 20  | 1909940  | 9.88E-01 | 1 |
| RREB1    | 664661  | 310  | 35  | 4315076 | 1312216 | 0 | 11 | 5  | 0 | 0  | 5   | 1312216  | 9.88E-01 | 1 |



|         |         |      |     |         |         |   |    |   |   |    |    |          |          |   |
|---------|---------|------|-----|---------|---------|---|----|---|---|----|----|----------|----------|---|
| RBM15B  | 538437  | 536  | 39  | 2143476 | 713424  | 0 | 2  | 2 | 0 | 50 | 76 | 25835276 | 9.88E-01 | 1 |
| FUCA1   | 903441  | 254  | 32  | 1198296 | 330012  | 0 | 1  | 0 | 0 | 7  | 7  | 2389828  | 9.88E-01 | 1 |
| XAGE5   | 476232  | NaN  | 26  | 295836  | 72624   | 0 | 2  | 2 | 0 | 2  | 2  | 193308   | 9.88E-01 | 1 |
| TMBIM6  | 1828526 | 265  | 67  | 775724  | 211108  | 0 | 3  | 2 | 0 | 1  | 5  | 549308   | 9.88E-01 | 1 |
| KANK2   | 1749900 | 233  | 33  | 2107876 | 694556  | 0 | 5  | 4 | 0 | 10 | 18 | 4181576  | 9.88E-01 | 1 |
| PRDM8   | 60915   | 903  | -4  | 1676404 | 547172  | 0 | 1  | 1 | 0 | 50 | 56 | 20692500 | 9.88E-01 | 1 |
| INPP5D  | 430468  | 259  | 37  | 2664660 | 733716  | 0 | 2  | 5 | 0 | 47 | 36 | 15994012 | 9.88E-01 | 1 |
| LPCAT3  | 2600423 | 211  | 49  | 1268428 | 346388  | 0 | 1  | 2 | 0 | 8  | 13 | 3527960  | 9.88E-01 | 1 |
| PNPLA2  | 1799017 | 232  | 51  | 1245288 | 406908  | 0 | 1  | 0 | 0 | 2  | 1  | 824496   | 9.88E-01 | 1 |
| UQCRFS1 | 158775  | 892  | -73 | 669280  | 216092  | 0 | 3  | 2 | 0 | 4  | 20 | 1896412  | 9.88E-01 | 1 |
| PLEKHG5 | 644634  | 203  | 44  | 2745472 | 825920  | 0 | 5  | 2 | 0 | 50 | 75 | 21467868 | 9.88E-01 | 1 |
| TRO     | 244459  | NaN  | -8  | 3666088 | 1127096 | 0 | 5  | 1 | 0 | 2  | 2  | 1604492  | 9.88E-01 | 1 |
| C5orf34 | 490107  | 369  | 10  | 1664656 | 433964  | 0 | 4  | 0 | 0 | 0  | 0  | 433964   | 9.88E-01 | 1 |
| ERAP1   | 394409  | 345  | 36  | 2475624 | 652548  | 0 | 1  | 2 | 0 | 17 | 11 | 6306184  | 9.88E-01 | 1 |
| ARMC5   | 839076  | 558  | 11  | 2420444 | 933076  | 0 | 5  | 2 | 0 | 35 | 62 | 15935984 | 9.88E-01 | 1 |
| STAT5A  | 2072592 | 190  | 33  | 2061596 | 562480  | 0 | 2  | 2 | 0 | 22 | 23 | 5687812  | 9.88E-01 | 1 |
| PHRF1   | 1872122 | 236  | 49  | 4056264 | 1299756 | 0 | 10 | 4 | 0 | 3  | 5  | 2124252  | 9.88E-01 | 1 |
| TRIL    | 67820   | 570  | 21  | 1896412 | 705236  | 0 | 3  | 5 | 0 | 18 | 26 | 7124272  | 9.88E-01 | 1 |
| TLL11   | 285948  | 541  | 24  | 2053764 | 627984  | 0 | 1  | 0 | 0 | 2  | 1  | 1353512  | 9.88E-01 | 1 |
| GGA3    | 1723762 | 171  | 31  | 1916348 | 567820  | 0 | 3  | 3 | 0 | 50 | 81 | 19557572 | 9.88E-01 | 1 |
| ATAD2B  | 233701  | 431  | 27  | 3794604 | 995376  | 0 | 4  | 2 | 0 | 15 | 11 | 5588844  | 9.88E-01 | 1 |
| GRM7    | 4936    | 1156 | -6  | 2381284 | 674264  | 0 | 11 | 8 | 0 | 4  | 11 | 1749740  | 9.88E-01 | 1 |
| TUBAL3  | 711034  | 519  | -1  | 1120332 | 326808  | 0 | 1  | 2 | 0 | 50 | 96 | 24023592 | 9.88E-01 | 1 |
| ZNF277  | 169396  | 550  | -8  | 1216808 | 275188  | 0 | 4  | 4 | 0 | 4  | 7  | 1358852  | 9.88E-01 | 1 |
| BTG1    | 114728  | 510  | 7   | 433252  | 122108  | 0 | 1  | 3 | 0 | 2  | 5  | 613388   | 9.88E-01 | 1 |
| AAK1    | 639466  | 309  | 35  | 2462096 | 705592  | 0 | 3  | 3 | 0 | 11 | 15 | 6007856  | 9.88E-01 | 1 |
| RTN4    | 913521  | 362  | 11  | 3027068 | 867928  | 0 | 8  | 2 | 0 | 2  | 5  | 1520120  | 9.88E-01 | 1 |
| ZDHHC5  | 923511  | 354  | 15  | 1785340 | 551444  | 0 | 3  | 4 | 0 | 15 | 21 | 4964064  | 9.88E-01 | 1 |
| OR6N2   | 103627  | 985  | 1   | 783556  | 234248  | 0 | 4  | 3 | 0 | 3  | 9  | 983984   | 9.88E-01 | 1 |
| LCT     | 493727  | 403  | 28  | 4877556 | 1370244 | 0 | 12 | 5 | 0 | 19 | 41 | 11702076 | 9.88E-01 | 1 |
| LMF2    | 1075525 | 207  | 42  | 1746180 | 579924  | 0 | 2  | 1 | 0 | 5  | 6  | 2060528  | 9.88E-01 | 1 |
| XRRA1   | 743843  | 365  | 29  | 2031336 | 582060  | 0 | 2  | 1 | 0 | 5  | 12 | 2983992  | 9.88E-01 | 1 |
| PCDHB6  | 915569  | 724  | -11 | 1923112 | 624068  | 0 | 13 | 7 | 0 | 1  | 13 | 1254900  | 9.88E-01 | 1 |

|         |         |      |     |         |         |   |    |   |   |    |     |          |          |   |
|---------|---------|------|-----|---------|---------|---|----|---|---|----|-----|----------|----------|---|
| POLRMT  | 1832767 | 218  | 10  | 3079044 | 954792  | 0 | 5  | 6 | 0 | 7  | 9   | 3061600  | 9.88E-01 | 1 |
| GRHL1   | 913916  | 234  | 40  | 1624072 | 423284  | 0 | 8  | 3 | 0 | 0  | 3   | 423284   | 9.88E-01 | 1 |
| RGL2    | 1456953 | 262  | 30  | 1917416 | 647920  | 0 | 5  | 1 | 0 | 1  | 4   | 961912   | 9.88E-01 | 1 |
| KIF24   | 596029  | 186  | 43  | 3453200 | 984340  | 0 | 6  | 3 | 0 | 50 | 69  | 22074848 | 9.88E-01 | 1 |
| XPNPEP1 | 248752  | 644  | -31 | 1756504 | 466004  | 0 | 2  | 2 | 0 | 50 | 90  | 24758376 | 9.88E-01 | 1 |
| ARNT    | 1787393 | 188  | 33  | 2053764 | 567108  | 0 | 6  | 1 | 0 | 2  | 3   | 809544   | 9.88E-01 | 1 |
| REG3A   | 10958   | 1389 | -22 | 465648  | 123888  | 0 | 3  | 2 | 0 | 2  | 7   | 338912   | 9.88E-01 | 1 |
| THEM4   | 966708  | 212  | 36  | 629764  | 163760  | 0 | 1  | 2 | 0 | 1  | 2   | 339268   | 9.88E-01 | 1 |
| FRK     | 230837  | 693  | -4  | 1311504 | 339624  | 0 | 3  | 0 | 0 | 6  | 11  | 2236748  | 9.88E-01 | 1 |
| EXOC2   | 157724  | 679  | 36  | 2451416 | 627628  | 0 | 5  | 5 | 0 | 18 | 24  | 6542924  | 9.88E-01 | 1 |
| RGS3    | 408310  | 330  | 38  | 3604500 | 1059456 | 0 | 3  | 0 | 0 | 0  | 0   | 1059456  | 9.88E-01 | 1 |
| UVRAG   | 520479  | 503  | 32  | 1800648 | 501960  | 0 | 2  | 1 | 0 | 50 | 89  | 24618824 | 9.88E-01 | 1 |
| SEMA6C  | 1562281 | 184  | 33  | 2360280 | 802068  | 0 | 6  | 4 | 0 | 5  | 6   | 1818092  | 9.88E-01 | 1 |
| FBXO2   | 682357  | 264  | 32  | 763620  | 211464  | 0 | 1  | 2 | 0 | 7  | 11  | 2008552  | 9.88E-01 | 1 |
| FAM46D  | 102816  | NaN  | -24 | 995376  | 258456  | 0 | 1  | 1 | 0 | 50 | 121 | 24775108 | 9.88E-01 | 1 |
| SOX9    | 159643  | 606  | -41 | 1270208 | 372376  | 0 | 3  | 4 | 0 | 2  | 5   | 1133148  | 9.89E-01 | 1 |
| FERMT1  | 302334  | 351  | -16 | 1778932 | 453188  | 0 | 4  | 3 | 0 | 3  | 7   | 1439308  | 9.89E-01 | 1 |
| CDT1    | 813333  | 189  | 51  | 1351020 | 442152  | 0 | 1  | 3 | 0 | 50 | 71  | 20606704 | 9.89E-01 | 1 |
| POGZ    | 1356854 | 163  | 37  | 3555016 | 1054472 | 0 | 5  | 2 | 0 | 25 | 42  | 14160612 | 9.89E-01 | 1 |
| SHANK3  | 669934  | 295  | 41  | 4245300 | 1449276 | 0 | 1  | 0 | 0 | 0  | 0   | 1449276  | 9.89E-01 | 1 |
| SYN1    | 775214  | NaN  | 38  | 1756860 | 556428  | 0 | 2  | 1 | 0 | 5  | 7   | 2499476  | 9.89E-01 | 1 |
| ZNF157  | 792781  | NaN  | 29  | 1306520 | 332860  | 0 | 2  | 0 | 0 | 1  | 0   | 445712   | 9.89E-01 | 1 |
| TLR9    | 1114737 | 181  | 52  | 2499120 | 814884  | 0 | 3  | 5 | 0 | 16 | 23  | 7041324  | 9.89E-01 | 1 |
| WDR37   | 334592  | 460  | 42  | 1282668 | 358848  | 0 | 2  | 2 | 0 | 8  | 15  | 3013540  | 9.89E-01 | 1 |
| CD163   | 665695  | 608  | 13  | 2981500 | 793880  | 0 | 10 | 2 | 0 | 0  | 2   | 793880   | 9.89E-01 | 1 |
| SLC2A10 | 292810  | 636  | 33  | 1291568 | 464224  | 0 | 5  | 6 | 0 | 15 | 19  | 2776800  | 9.89E-01 | 1 |
| LAMC3   | 815585  | 293  | 36  | 3998592 | 1168392 | 0 | 8  | 6 | 0 | 50 | 78  | 24498852 | 9.89E-01 | 1 |
| CCNB3   | 45831   | NaN  | 1   | 3579224 | 940552  | 0 | 8  | 3 | 0 | 14 | 16  | 4934160  | 9.89E-01 | 1 |
| DIXDC1  | 416878  | 221  | 22  | 1830196 | 468140  | 0 | 3  | 1 | 0 | 1  | 1   | 610184   | 9.89E-01 | 1 |
| TCF7    | 694434  | 227  | 60  | 1126384 | 321824  | 0 | 1  | 1 | 0 | 2  | 1   | 741548   | 9.89E-01 | 1 |
| PRPF18  | 234408  | 635  | 32  | 911716  | 225704  | 0 | 4  | 3 | 0 | 13 | 18  | 2251700  | 9.89E-01 | 1 |
| MMP9    | 630342  | 381  | 51  | 1789256 | 532576  | 0 | 4  | 5 | 0 | 6  | 20  | 3294424  | 9.89E-01 | 1 |
| INTS5   | 2425755 | 248  | 51  | 2399796 | 874692  | 0 | 9  | 8 | 0 | 8  | 12  | 2683884  | 9.89E-01 | 1 |

|          |         |     |     |         |         |   |    |    |   |    |    |          |          |   |
|----------|---------|-----|-----|---------|---------|---|----|----|---|----|----|----------|----------|---|
| JAG1     | 165910  | 431 | -28 | 3223936 | 788540  | 0 | 10 | 5  | 0 | 2  | 6  | 1366684  | 9.89E-01 | 1 |
| ZFHX3    | 122465  | 495 | -11 | 9234284 | 2671780 | 0 | 20 | 11 | 0 | 7  | 16 | 5664316  | 9.89E-01 | 1 |
| RASGEF1E | 9755    | 972 | 9   | 1269852 | 304380  | 0 | 4  | 2  | 0 | 1  | 2  | 617660   | 9.89E-01 | 1 |
| GIT1     | 719319  | 383 | 30  | 1979716 | 576008  | 0 | 6  | 6  | 0 | 8  | 13 | 2253480  | 9.89E-01 | 1 |
| ZNF536   | 106911  | 926 | -73 | 3242092 | 943400  | 0 | 21 | 11 | 0 | 5  | 29 | 3364200  | 9.89E-01 | 1 |
| NOTCH4   | 2119974 | 392 | 28  | 5013192 | 1535784 | 0 | 12 | 3  | 0 | 7  | 10 | 3195456  | 9.89E-01 | 1 |
| AMIGO1   | 1056159 | 272 | 37  | 1212892 | 374156  | 0 | 1  | 3  | 0 | 25 | 37 | 9031364  | 9.89E-01 | 1 |
| KLKB1    | 371112  | 606 | -2  | 1683880 | 422216  | 0 | 1  | 0  | 0 | 17 | 21 | 8299072  | 9.89E-01 | 1 |
| SP140L   | 535116  | 642 | 36  | 1580996 | 359560  | 0 | 1  | 0  | 0 | 50 | 56 | 19137492 | 9.89E-01 | 1 |
| ABTB2    | 769733  | 368 | 32  | 2144544 | 615168  | 0 | 2  | 1  | 0 | 37 | 53 | 17650836 | 9.89E-01 | 1 |
| ZNF8     | 1546372 | 406 | -39 | 1459600 | 398720  | 0 | 1  | 1  | 0 | 47 | 62 | 18114704 | 9.89E-01 | 1 |
| CPEB2    | 105433  | 624 | 23  | 2576016 | 796728  | 0 | 1  | 0  | 0 | 28 | 23 | 12719524 | 9.89E-01 | 1 |
| RPP38    | 254900  | 620 | 21  | 710220  | 206124  | 0 | 3  | 0  | 0 | 0  | 0  | 206124   | 9.89E-01 | 1 |
| TRIM28   | 2673870 | 276 | 11  | 2111436 | 635460  | 0 | 4  | 1  | 0 | 3  | 6  | 1930944  | 9.89E-01 | 1 |
| CDH20    | 45961   | 896 | -6  | 2045932 | 568532  | 0 | 1  | 2  | 0 | 50 | 57 | 21439744 | 9.89E-01 | 1 |
| ABCG8    | 501561  | 480 | 30  | 1722328 | 490568  | 0 | 1  | 3  | 0 | 37 | 56 | 17515200 | 9.89E-01 | 1 |
| SMG6     | 1171119 | 368 | 30  | 3601652 | 1027060 | 0 | 3  | 2  | 0 | 8  | 11 | 4548256  | 9.89E-01 | 1 |
| VWA2     | 290609  | 437 | 21  | 1797800 | 575296  | 0 | 1  | 1  | 0 | 50 | 60 | 22942064 | 9.89E-01 | 1 |
| OR10H2   | 878287  | 605 | 13  | 767180  | 249556  | 0 | 2  | 2  | 0 | 1  | 2  | 481312   | 9.89E-01 | 1 |
| NFRKB    | 635581  | 248 | -3  | 3324328 | 1023500 | 0 | 7  | 1  | 0 | 0  | 1  | 1023500  | 9.89E-01 | 1 |
| CDC25C   | 1312427 | 273 | 36  | 1263088 | 311144  | 0 | 2  | 4  | 0 | 3  | 8  | 1774660  | 9.89E-01 | 1 |
| ABCC11   | 216539  | 578 | -22 | 3546472 | 1008548 | 0 | 12 | 6  | 0 | 1  | 11 | 2648640  | 9.89E-01 | 1 |
| MGAT5    | 177903  | 761 | 17  | 1945184 | 498400  | 0 | 2  | 3  | 0 | 20 | 19 | 6079768  | 9.89E-01 | 1 |
| SREBF2   | 1336623 | 243 | 62  | 2849068 | 886796  | 0 | 6  | 1  | 0 | 0  | 1  | 886796   | 9.89E-01 | 1 |
| ALCOCO   | 757963  | 239 | 29  | 1217876 | 265576  | 0 | 1  | 2  | 0 | 13 | 21 | 5325404  | 9.89E-01 | 1 |
| PTDSS2   | 2206786 | 344 | 58  | 1260240 | 350304  | 0 | 1  | 0  | 0 | 46 | 82 | 22476060 | 9.89E-01 | 1 |
| ERCC6L   | NaN     | NaN | NaN | 3156652 | 857960  | 0 | 6  | 0  | 0 | 7  | 14 | 4546120  | 9.90E-01 | 1 |
| GLTSCR1  | 788433  | 258 | 33  | 3708452 | 1348528 | 0 | 4  | 1  | 0 | 1  | 2  | 1841232  | 9.90E-01 | 1 |
| ALGAPA   | 239875  | 869 | 6   | 4855840 | 1315064 | 0 | 12 | 3  | 0 | 50 | 67 | 21249640 | 9.90E-01 | 1 |
| ABCA2    | 1951939 | 202 | 40  | 6265600 | 1919552 | 0 | 9  | 3  | 0 | 12 | 16 | 6825232  | 9.90E-01 | 1 |
| ZFYVE1   | 370279  | 341 | 43  | 1980428 | 555004  | 0 | 2  | 3  | 0 | 5  | 7  | 2662168  | 9.90E-01 | 1 |
| GPR137   | 1613996 | 257 | 65  | 1369888 | 420080  | 0 | 2  | 2  | 0 | 19 | 29 | 6446448  | 9.90E-01 | 1 |
| CORO7    | 754886  | 161 | 41  | 2347108 | 735140  | 0 | 3  | 3  | 0 | 50 | 65 | 19876192 | 9.90E-01 | 1 |

|          |         |      |     |         |         |   |    |    |   |    |    |          |          |   |
|----------|---------|------|-----|---------|---------|---|----|----|---|----|----|----------|----------|---|
| PEAR1    | 1362027 | 244  | 38  | 2679968 | 739768  | 0 | 1  | 0  | 0 | 10 | 12 | 6577100  | 9.90E-01 | 1 |
| USO1     | 482408  | 363  | 51  | 2405492 | 608404  | 0 | 2  | 0  | 0 | 7  | 11 | 4789624  | 9.90E-01 | 1 |
| TGM7     | 825765  | 415  | 44  | 1818448 | 512996  | 0 | 1  | 0  | 0 | 33 | 42 | 14598492 | 9.90E-01 | 1 |
| TMEM104  | 1005466 | 320  | 19  | 1252408 | 378428  | 0 | 1  | 2  | 0 | 9  | 16 | 4922056  | 9.90E-01 | 1 |
| DOCK8    | 193637  | 462  | 2   | 5637260 | 1507660 | 0 | 14 | 11 | 0 | 6  | 14 | 3425788  | 9.90E-01 | 1 |
| MRGPRD   | 557282  | 416  | 51  | 779640  | 250980  | 0 | 3  | 4  | 0 | 1  | 6  | 525812   | 9.90E-01 | 1 |
| PCDHB14  | 800016  | 708  | -15 | 1931656 | 628340  | 0 | 11 | 5  | 0 | 6  | 22 | 2779292  | 9.90E-01 | 1 |
| COL8A2   | 853740  | 282  | 27  | 1622292 | 639732  | 0 | 2  | 0  | 0 | 5  | 8  | 2512292  | 9.90E-01 | 1 |
| E2F7     | 106320  | 887  | -11 | 2292284 | 678892  | 0 | 6  | 2  | 0 | 6  | 25 | 5893580  | 9.90E-01 | 1 |
| HLA-DOA  | 1276842 | 431  | 40  | 629408  | 194020  | 0 | 1  | 2  | 0 | 3  | 7  | 1166256  | 9.90E-01 | 1 |
| ANKRD13A | 950689  | 254  | 54  | 1555364 | 398008  | 0 | 2  | 1  | 0 | 17 | 21 | 5484536  | 9.90E-01 | 1 |
| MID2     | 167346  | NaN  | 49  | 1892496 | 504096  | 0 | 4  | 1  | 0 | 6  | 11 | 2833404  | 9.90E-01 | 1 |
| TMEM63A  | 924499  | 239  | 8   | 2107164 | 579924  | 0 | 2  | 2  | 0 | 50 | 59 | 18688932 | 9.90E-01 | 1 |
| FUT9     | 76115   | 1328 | -21 | 920616  | 237096  | 0 | 2  | 2  | 0 | 2  | 5  | 985052   | 9.90E-01 | 1 |
| MYO1G    | 1110535 | 235  | 57  | 2592392 | 764332  | 0 | 6  | 5  | 0 | 11 | 30 | 8518368  | 9.90E-01 | 1 |
| SLC35A5  | 279107  | 502  | 33  | 1092564 | 294768  | 0 | 1  | 3  | 0 | 8  | 9  | 2540416  | 9.90E-01 | 1 |
| GALC     | 83365   | 976  | -37 | 1843724 | 489856  | 0 | 4  | 2  | 0 | 9  | 22 | 3619808  | 9.90E-01 | 1 |
| MYO5B    | 276079  | 530  | 40  | 4838040 | 1252764 | 0 | 9  | 6  | 0 | 50 | 49 | 16508432 | 9.90E-01 | 1 |
| ALKBH1   | 455772  | 384  | 47  | 997512  | 277680  | 0 | 1  | 2  | 0 | 16 | 22 | 4877200  | 9.90E-01 | 1 |
| FLII     | 925111  | 223  | 18  | 3288016 | 907088  | 0 | 2  | 1  | 0 | 7  | 7  | 4320416  | 9.90E-01 | 1 |
| PSG11    | 263820  | 178  | -32 | 853688  | 244216  | 0 | 3  | 0  | 0 | 0  | 0  | 244216   | 9.90E-01 | 1 |
| MMS19    | 556333  | 188  | 42  | 2643300 | 788184  | 0 | 4  | 0  | 0 | 3  | 5  | 2086872  | 9.90E-01 | 1 |
| TTYH3    | 769920  | 259  | 35  | 1329304 | 405128  | 0 | 1  | 0  | 0 | 10 | 14 | 4479192  | 9.90E-01 | 1 |
| CLCA1    | 279518  | 762  | -8  | 2330020 | 657176  | 0 | 5  | 4  | 0 | 10 | 20 | 6328612  | 9.90E-01 | 1 |
| SNRNP200 | 904852  | 213  | 43  | 5517288 | 1517628 | 0 | 7  | 3  | 0 | 26 | 28 | 11982604 | 9.90E-01 | 1 |
| COL6A2   | 742075  | 538  | 10  | 2870784 | 860808  | 0 | 5  | 7  | 0 | 10 | 12 | 3254196  | 9.90E-01 | 1 |
| TIAM2    | 120675  | 362  | 27  | 4341776 | 1213960 | 0 | 20 | 8  | 0 | 3  | 9  | 1756504  | 9.90E-01 | 1 |
| NPHS1    | 1060028 | 321  | 47  | 3117848 | 981136  | 0 | 9  | 7  | 0 | 6  | 12 | 3110728  | 9.90E-01 | 1 |
| TUBB8    | 9202    | NaN  | NaN | 1125316 | 313280  | 0 | 1  | 0  | 0 | 10 | 47 | 9932044  | 9.90E-01 | 1 |
| WDR91    | 464513  | 594  | 20  | 1916704 | 541832  | 0 | 3  | 5  | 0 | 20 | 26 | 6396964  | 9.90E-01 | 1 |
| IPO13    | 875223  | 214  | 39  | 2453908 | 715916  | 0 | 3  | 3  | 0 | 50 | 67 | 19898264 | 9.90E-01 | 1 |
| TRIB2    | 49360   | 996  | -2  | 861876  | 248844  | 0 | 4  | 4  | 0 | 2  | 12 | 1468144  | 9.90E-01 | 1 |
| KIF20A   | 1127160 | 314  | 50  | 2298692 | 632968  | 0 | 3  | 1  | 0 | 39 | 55 | 16930648 | 9.90E-01 | 1 |

|         |         |      |     |         |         |   |    |   |   |    |     |          |          |   |
|---------|---------|------|-----|---------|---------|---|----|---|---|----|-----|----------|----------|---|
| FBXL2   | 496632  | 352  | 15  | 1115348 | 307228  | 0 | 5  | 4 | 0 | 3  | 5   | 818088   | 9.90E-01 | 1 |
| TRIM5   | 134136  | 838  | 5   | 1464584 | 399076  | 0 | 2  | 0 | 0 | 3  | 2   | 901036   | 9.90E-01 | 1 |
| TCTN3   | 370056  | 547  | 31  | 1556432 | 447136  | 0 | 1  | 0 | 0 | 21 | 39  | 11759036 | 9.90E-01 | 1 |
| IGF2BP3 | 494999  | 197  | 26  | 1500540 | 417588  | 0 | 4  | 1 | 0 | 2  | 1   | 538272   | 9.90E-01 | 1 |
| OR10K2  | 135429  | 902  | 5   | 760416  | 240300  | 0 | 1  | 3 | 0 | 10 | 17  | 2925608  | 9.90E-01 | 1 |
| TMC3    | 245396  | 787  | 28  | 2844084 | 773232  | 0 | 4  | 5 | 0 | 27 | 36  | 9419760  | 9.90E-01 | 1 |
| MPRIP   | 783403  | 214  | 11  | 2720196 | 746532  | 0 | 3  | 3 | 0 | 50 | 80  | 24314800 | 9.90E-01 | 1 |
| ACACA   | 526151  | 346  | 13  | 6227864 | 1704172 | 0 | 16 | 8 | 0 | 26 | 50  | 13441492 | 9.90E-01 | 1 |
| LRIG2   | 641888  | 455  | 13  | 2743692 | 744396  | 0 | 5  | 2 | 0 | 11 | 14  | 4319348  | 9.90E-01 | 1 |
| ADAD2   | 582429  | 364  | 12  | 1636176 | 540408  | 0 | 1  | 0 | 0 | 0  | 0   | 540408   | 9.90E-01 | 1 |
| DDX11   | 335562  | 591  | -4  | 2589900 | 637596  | 0 | 9  | 3 | 0 | 1  | 4   | 1235676  | 9.90E-01 | 1 |
| CST9L   | 189307  | 772  | -47 | 383768  | 98968   | 0 | 3  | 3 | 0 | 1  | 3   | 203632   | 9.90E-01 | 1 |
| ST8SIA6 | 514060  | 523  | -4  | 1022076 | 286224  | 0 | 2  | 3 | 0 | 7  | 13  | 2309728  | 9.90E-01 | 1 |
| PANK1   | 212241  | 345  | 18  | 1516560 | 460308  | 0 | 2  | 4 | 0 | 8  | 8   | 2313644  | 9.90E-01 | 1 |
| RPL7    | 259225  | 340  | 19  | 658244  | 166252  | 0 | 2  | 1 | 0 | 1  | 2   | 415808   | 9.90E-01 | 1 |
| ELSPBP1 | 881809  | 433  | 29  | 611608  | 131720  | 0 | 2  | 2 | 0 | 1  | 9   | 899256   | 9.91E-01 | 1 |
| NLN     | 407983  | 149  | 33  | 1840876 | 469208  | 0 | 2  | 2 | 0 | 16 | 19  | 5852640  | 9.91E-01 | 1 |
| ACP1    | 304765  | 624  | -18 | 578144  | 120328  | 0 | 1  | 2 | 0 | 3  | 4   | 725528   | 9.91E-01 | 1 |
| ANKK1   | 107636  | 610  | 12  | 1907804 | 578500  | 0 | 1  | 0 | 0 | 4  | 6   | 2722688  | 9.91E-01 | 1 |
| TAS2R31 | 365490  | 676  | -2  | 772876  | 224636  | 0 | 3  | 4 | 0 | 3  | 7   | 880388   | 9.91E-01 | 1 |
| VPS35   | 432970  | 253  | -24 | 2088296 | 535780  | 0 | 4  | 4 | 0 | 18 | 30  | 6953748  | 9.91E-01 | 1 |
| SLC4A9  | 683517  | 143  | 39  | 2408340 | 759348  | 0 | 4  | 1 | 0 | 3  | 3   | 1425068  | 9.91E-01 | 1 |
| NPAS2   | 339144  | 406  | 14  | 2134932 | 593808  | 0 | 4  | 6 | 0 | 6  | 12  | 2632620  | 9.91E-01 | 1 |
| MMP3    | 468929  | 506  | -21 | 1240304 | 331792  | 0 | 1  | 1 | 0 | 50 | 104 | 26781880 | 9.91E-01 | 1 |
| ADNP2   | 477656  | 572  | 4   | 2783208 | 856536  | 0 | 2  | 3 | 0 | 18 | 21  | 9174476  | 9.91E-01 | 1 |
| FBXL6   | 2525749 | 200  | 28  | 1316844 | 451764  | 0 | 2  | 3 | 0 | 4  | 8   | 1894276  | 9.91E-01 | 1 |
| FBXL18  | 1906749 | 195  | 34  | 1750452 | 572448  | 0 | 2  | 0 | 0 | 0  | 0   | 572448   | 9.91E-01 | 1 |
| CDK5    | 622098  | 373  | 41  | 774300  | 211464  | 0 | 2  | 3 | 0 | 1  | 5   | 803492   | 9.91E-01 | 1 |
| TRIM69  | 673122  | 428  | 36  | 1300112 | 332860  | 0 | 4  | 3 | 0 | 5  | 10  | 1894632  | 9.91E-01 | 1 |
| ATRN    | 971216  | 421  | 27  | 3751172 | 975796  | 0 | 4  | 3 | 0 | 2  | 4   | 2056968  | 9.91E-01 | 1 |
| ZNF561  | 776094  | 617  | -51 | 1254544 | 322892  | 0 | 1  | 0 | 0 | 16 | 21  | 5938792  | 9.91E-01 | 1 |
| MAP9    | 44097   | 944  | -5  | 1734076 | 397652  | 0 | 5  | 0 | 0 | 0  | 0   | 397652   | 9.91E-01 | 1 |
| SOX30   | 260667  | 1079 | 41  | 1871848 | 561056  | 0 | 1  | 0 | 0 | 2  | 1   | 1160916  | 9.91E-01 | 1 |

|         |         |      |     |         |         |   |    |   |   |    |    |          |          |   |
|---------|---------|------|-----|---------|---------|---|----|---|---|----|----|----------|----------|---|
| BRSK2   | 1234040 | 426  | 43  | 1733720 | 490924  | 0 | 2  | 1 | 0 | 7  | 11 | 3317208  | 9.91E-01 | 1 |
| ESCO1   | 333266  | 221  | 35  | 2179788 | 548952  | 0 | 4  | 1 | 0 | 1  | 1  | 668568   | 9.91E-01 | 1 |
| LRRC8D  | 180057  | 257  | 13  | 2169820 | 586688  | 0 | 3  | 3 | 0 | 50 | 62 | 18767608 | 9.91E-01 | 1 |
| FLT1    | 198131  | 693  | 41  | 3710232 | 978288  | 0 | 6  | 4 | 0 | 50 | 67 | 19959852 | 9.91E-01 | 1 |
| DUSP13  | 223189  | 298  | 40  | 1202924 | 374512  | 0 | 1  | 0 | 0 | 6  | 9  | 2642232  | 9.91E-01 | 1 |
| MAPKBP1 | 816015  | 259  | 37  | 3828780 | 1153440 | 0 | 6  | 1 | 0 | 0  | 1  | 1153440  | 9.91E-01 | 1 |
| DPF1    | 1410213 | 301  | -1  | 1122824 | 288004  | 0 | 1  | 2 | 0 | 3  | 2  | 852976   | 9.91E-01 | 1 |
| DSPP    | 500313  | 623  | -7  | 3566408 | 622288  | 0 | 8  | 2 | 0 | 15 | 24 | 7044884  | 9.91E-01 | 1 |
| DVL3    | 1453689 | 334  | 42  | 1831264 | 525812  | 0 | 2  | 1 | 0 | 10 | 20 | 5986140  | 9.91E-01 | 1 |
| DBF4B   | 1261173 | 175  | 29  | 1615172 | 459952  | 0 | 1  | 1 | 0 | 6  | 11 | 3459608  | 9.91E-01 | 1 |
| WDR7    | 101104  | 885  | 38  | 3801368 | 1091140 | 0 | 7  | 4 | 0 | 50 | 70 | 21403788 | 9.91E-01 | 1 |
| PREP    | 105381  | 510  | 12  | 1868288 | 469564  | 0 | 1  | 0 | 0 | 49 | 64 | 24390272 | 9.91E-01 | 1 |
| MYO6    | 362445  | 482  | 17  | 3440740 | 824852  | 0 | 5  | 2 | 0 | 1  | 2  | 1459956  | 9.91E-01 | 1 |
| MAN2A2  | 833957  | 291  | 42  | 2913504 | 866148  | 0 | 4  | 4 | 0 | 50 | 63 | 21711728 | 9.91E-01 | 1 |
| SUPT7L  | 1192074 | 306  | 43  | 1058388 | 292632  | 0 | 4  | 2 | 0 | 3  | 9  | 1304028  | 9.91E-01 | 1 |
| CCDC88C | 271632  | 469  | 47  | 5147760 | 1479180 | 0 | 9  | 5 | 0 | 24 | 35 | 13100088 | 9.91E-01 | 1 |
| FAM47A  | 7968    | NaN  | -15 | 1938776 | 600928  | 0 | 5  | 4 | 0 | 4  | 6  | 1434324  | 9.91E-01 | 1 |
| DLST    | 884998  | 232  | 41  | 1171596 | 344964  | 0 | 1  | 2 | 0 | 2  | 3  | 1210044  | 9.91E-01 | 1 |
| CELF5   | 903046  | 241  | 39  | 1276972 | 334640  | 0 | 1  | 2 | 0 | 5  | 8  | 2437176  | 9.91E-01 | 1 |
| TCTN1   | 859648  | 194  | 32  | 1660740 | 483804  | 0 | 1  | 2 | 0 | 50 | 88 | 26880492 | 9.91E-01 | 1 |
| MTMR3   | 752285  | 253  | 29  | 3097912 | 853688  | 0 | 8  | 1 | 0 | 3  | 11 | 2602004  | 9.91E-01 | 1 |
| MUS81   | 3779084 | 287  | 42  | 1388756 | 443932  | 0 | 1  | 0 | 0 | 2  | 1  | 852264   | 9.91E-01 | 1 |
| EHD2    | 812020  | 262  | 36  | 1356716 | 407620  | 0 | 5  | 4 | 0 | 3  | 9  | 1472416  | 9.91E-01 | 1 |
| ARL14   | 493112  | 396  | 8   | 484516  | 133856  | 0 | 1  | 2 | 0 | 2  | 4  | 598080   | 9.91E-01 | 1 |
| ASXL3   | 7579    | 1014 | -10 | 5611984 | 1642940 | 0 | 17 | 4 | 0 | 2  | 6  | 2323256  | 9.91E-01 | 1 |
| COL6A6  | 198659  | 527  | 16  | 5786424 | 1619088 | 0 | 21 | 8 | 0 | 7  | 15 | 3282320  | 9.91E-01 | 1 |
| USP51   | 92250   | NaN  | 8   | 1785696 | 499824  | 0 | 1  | 2 | 0 | 40 | 78 | 22198736 | 9.91E-01 | 1 |
| MAML3   | 351118  | 591  | 8   | 2846932 | 810968  | 0 | 4  | 2 | 0 | 50 | 65 | 20955584 | 9.91E-01 | 1 |
| LRRC27  | 150194  | 280  | 13  | 1537564 | 398720  | 0 | 1  | 0 | 0 | 25 | 35 | 10389860 | 9.91E-01 | 1 |
| NOTCH2  | 429750  | 510  | 14  | 6350328 | 1710936 | 0 | 11 | 5 | 0 | 9  | 14 | 5493080  | 9.92E-01 | 1 |
| TMC6    | 527017  | 217  | 27  | 2032404 | 631188  | 0 | 5  | 7 | 0 | 9  | 36 | 5477416  | 9.92E-01 | 1 |
| OFD1    | 135235  | NaN  | 48  | 2680680 | 658956  | 0 | 8  | 1 | 0 | 0  | 1  | 658956   | 9.92E-01 | 1 |
| PLEKHG1 | 284652  | 263  | 27  | 3535436 | 969388  | 0 | 4  | 3 | 0 | 9  | 8  | 3733728  | 9.92E-01 | 1 |

|          |         |      |     |          |         |   |    |    |   |    |     |          |          |   |
|----------|---------|------|-----|----------|---------|---|----|----|---|----|-----|----------|----------|---|
| C9orf117 | 1098647 | 172  | 32  | 1344968  | 362764  | 0 | 1  | 2  | 0 | 50 | 71  | 18037452 | 9.92E-01 | 1 |
| GLMN     | 377839  | 559  | -1  | 1607340  | 375936  | 0 | 2  | 1  | 0 | 11 | 16  | 4333232  | 9.92E-01 | 1 |
| SOHLH1   | 362222  | 524  | 29  | 996088   | 320756  | 0 | 1  | 1  | 0 | 3  | 3   | 1017804  | 9.92E-01 | 1 |
| ATIC     | 530312  | 531  | 12  | 1538276  | 425776  | 0 | 2  | 4  | 0 | 23 | 33  | 8340368  | 9.92E-01 | 1 |
| ATP2B4   | 513211  | 256  | 35  | 3219664  | 919904  | 0 | 13 | 7  | 0 | 6  | 14  | 2592392  | 9.92E-01 | 1 |
| ACVR2A   | 90992   | 951  | -2  | 1346036  | 343540  | 0 | 1  | 2  | 0 | 50 | 81  | 20491360 | 9.92E-01 | 1 |
| PLK2     | 125347  | 446  | 5   | 1787120  | 466360  | 0 | 4  | 0  | 0 | 2  | 3   | 1003564  | 9.92E-01 | 1 |
| GPR161   | 476316  | 391  | 10  | 1323252  | 396228  | 0 | 7  | 2  | 0 | 1  | 3   | 493060   | 9.92E-01 | 1 |
| SLC12A1  | 263035  | 455  | -25 | 2949460  | 788540  | 0 | 4  | 0  | 0 | 1  | 1   | 1022788  | 9.92E-01 | 1 |
| NBPF14   | NaN     | NaN  | NaN | 2443228  | 602708  | 0 | 2  | 2  | 0 | 50 | 118 | 40248292 | 9.92E-01 | 1 |
| IL23R    | 453952  | 581  | -4  | 1650060  | 411180  | 0 | 1  | 0  | 0 | 7  | 7   | 2473844  | 9.92E-01 | 1 |
| PCDH17   | 8275    | 1095 | -28 | 2848356  | 881100  | 0 | 12 | 8  | 0 | 10 | 28  | 3966196  | 9.92E-01 | 1 |
| CAMKK1   | 505430  | 215  | 30  | 1412964  | 400500  | 0 | 1  | 1  | 0 | 44 | 57  | 16214732 | 9.92E-01 | 1 |
| SGK494   | 1651143 | 225  | 31  | 1065864  | 300108  | 0 | 2  | 3  | 0 | 3  | 13  | 2353516  | 9.92E-01 | 1 |
| IL24     | 467839  | 385  | 39  | 573160   | 116768  | 0 | 1  | 1  | 0 | 5  | 11  | 1456752  | 9.92E-01 | 1 |
| SULT1A2  | 1141256 | 269  | 53  | 779284   | 201140  | 0 | 1  | 3  | 0 | 8  | 10  | 1683524  | 9.92E-01 | 1 |
| HSPA8    | 709511  | 307  | 8   | 1646856  | 460308  | 0 | 10 | 3  | 0 | 0  | 3   | 460308   | 9.92E-01 | 1 |
| ACADM    | 152734  | 578  | -13 | 1119264  | 292632  | 0 | 1  | 2  | 0 | 4  | 5   | 1462092  | 9.92E-01 | 1 |
| SOAT2    | 1727618 | 177  | 46  | 1344256  | 393380  | 0 | 1  | 1  | 0 | 50 | 73  | 19535500 | 9.92E-01 | 1 |
| FGL1     | 399891  | 253  | -16 | 841940   | 190816  | 0 | 1  | 2  | 0 | 8  | 15  | 2877192  | 9.92E-01 | 1 |
| FSIP2    | 44989   | 953  | 4   | 17835956 | 4678552 | 0 | 16 | 3  | 0 | 0  | 3   | 4678552  | 9.92E-01 | 1 |
| TACC2    | 233439  | 340  | 9   | 7332532  | 2284808 | 0 | 15 | 12 | 0 | 37 | 43  | 14565740 | 9.92E-01 | 1 |
| TRPC5    | 113544  | NaN  | 10  | 2489152  | 674264  | 0 | 7  | 5  | 0 | 1  | 14  | 2302252  | 9.92E-01 | 1 |
| FAM193B  | 1120311 | 347  | 41  | 1970460  | 593808  | 0 | 2  | 0  | 0 | 7  | 14  | 4379512  | 9.92E-01 | 1 |
| ABCC2    | 1035115 | 171  | 30  | 3965484  | 1120332 | 0 | 10 | 4  | 0 | 45 | 65  | 18031756 | 9.92E-01 | 1 |
| CCDC146  | 312362  | 639  | 35  | 2543620  | 596300  | 0 | 3  | 1  | 0 | 6  | 5   | 2189400  | 9.92E-01 | 1 |
| SPEG     | 581956  | 335  | 35  | 7943428  | 2708804 | 0 | 13 | 9  | 0 | 26 | 35  | 13221128 | 9.92E-01 | 1 |
| CNGA2    | 126208  | NaN  | -2  | 1682456  | 473836  | 0 | 5  | 4  | 0 | 4  | 10  | 2035608  | 9.92E-01 | 1 |
| HIATL1   | 229346  | 486  | 34  | 1290856  | 380564  | 0 | 2  | 1  | 0 | 5  | 8   | 1894276  | 9.92E-01 | 1 |
| OR6K6    | 103627  | 985  | 1   | 851552   | 250624  | 0 | 4  | 3  | 0 | 3  | 9   | 983984   | 9.92E-01 | 1 |
| PHF8     | 830265  | NaN  | 30  | 2872920  | 793524  | 0 | 4  | 3  | 0 | 50 | 70  | 21609912 | 9.92E-01 | 1 |
| SIPA1L3  | 688670  | 605  | -17 | 4425792  | 1364904 | 0 | 11 | 7  | 0 | 50 | 87  | 21088728 | 9.92E-01 | 1 |
| WDR88    | 406033  | 270  | -8  | 1229268  | 331080  | 0 | 1  | 3  | 0 | 5  | 9   | 2449280  | 9.92E-01 | 1 |

|          |         |     |     |          |         |   |    |    |   |    |    |          |          |   |
|----------|---------|-----|-----|----------|---------|---|----|----|---|----|----|----------|----------|---|
| PARP10   | 2580629 | 247 | 28  | 2479184  | 850840  | 0 | 5  | 3  | 0 | 1  | 3  | 1133148  | 9.92E-01 | 1 |
| PTPRA    | 807310  | 396 | 46  | 2105028  | 557496  | 0 | 2  | 3  | 0 | 50 | 84 | 27392064 | 9.92E-01 | 1 |
| SLC35F1  | 200805  | 959 | -18 | 1029196  | 311144  | 0 | 2  | 4  | 0 | 5  | 13 | 1932012  | 9.92E-01 | 1 |
| UBQLN3   | 99343   | 946 | -2  | 1596304  | 509792  | 0 | 2  | 1  | 0 | 12 | 27 | 7334312  | 9.92E-01 | 1 |
| BNC2     | 37330   | 534 | -14 | 2776800  | 773232  | 0 | 10 | 8  | 0 | 4  | 14 | 2238884  | 9.92E-01 | 1 |
| SPG21    | 705779  | 185 | 57  | 814884   | 209328  | 0 | 1  | 2  | 0 | 7  | 19 | 3412616  | 9.92E-01 | 1 |
| SIN3A    | 775031  | 296 | 47  | 3277692  | 889644  | 0 | 9  | 1  | 0 | 3  | 8  | 2300116  | 9.92E-01 | 1 |
| SNX8     | 806717  | 291 | 44  | 1197584  | 342472  | 0 | 1  | 3  | 0 | 5  | 12 | 2974736  | 9.92E-01 | 1 |
| RHOBTB1  | 99491   | 403 | -13 | 1791748  | 479888  | 0 | 4  | 2  | 0 | 4  | 9  | 2119980  | 9.92E-01 | 1 |
| KLHL38   | 517269  | 192 | 22  | 1466008  | 411536  | 0 | 2  | 0  | 0 | 2  | 2  | 875404   | 9.92E-01 | 1 |
| SETDB2   | 413604  | 343 | 39  | 1893208  | 469208  | 0 | 2  | 0  | 0 | 4  | 10 | 3625504  | 9.92E-01 | 1 |
| ZNF182   | 550680  | NaN | 20  | 1680676  | 409400  | 0 | 2  | 1  | 0 | 19 | 32 | 7840900  | 9.92E-01 | 1 |
| MATN3    | 501661  | 150 | 25  | 1236032  | 356356  | 0 | 3  | 1  | 0 | 2  | 1  | 477040   | 9.92E-01 | 1 |
| KIF18A   | 316347  | 482 | -11 | 2356008  | 592740  | 0 | 7  | 4  | 0 | 1  | 4  | 1039520  | 9.92E-01 | 1 |
| RINT1    | 454408  | 172 | 36  | 2060172  | 540408  | 0 | 6  | 1  | 0 | 0  | 1  | 540408   | 9.92E-01 | 1 |
| KLK1     | 655673  | 589 | 25  | 677824   | 186188  | 0 | 1  | 2  | 0 | 4  | 6  | 897120   | 9.92E-01 | 1 |
| APBB2    | 227095  | 394 | 39  | 1962628  | 536492  | 0 | 1  | 0  | 0 | 10 | 12 | 5338932  | 9.92E-01 | 1 |
| VPS13D   | 490718  | 340 | 28  | 11231800 | 3125324 | 0 | 28 | 16 | 0 | 13 | 25 | 6936660  | 9.92E-01 | 1 |
| ZNF628   | 1048909 | 399 | 24  | 2497696  | 890000  | 0 | 3  | 4  | 0 | 50 | 71 | 20869076 | 9.92E-01 | 1 |
| ADAMTS10 | 622624  | 214 | -14 | 2810976  | 828768  | 0 | 7  | 2  | 0 | 2  | 5  | 1343544  | 9.92E-01 | 1 |
| INTS10   | 207502  | 242 | 10  | 1877900  | 468496  | 0 | 1  | 1  | 0 | 20 | 27 | 9567500  | 9.92E-01 | 1 |
| SPATA6   | 27215   | 691 | -19 | 1286940  | 331080  | 0 | 1  | 2  | 0 | 50 | 79 | 21309448 | 9.92E-01 | 1 |
| TMEM164  | 216187  | NaN | 42  | 752228   | 223924  | 0 | 2  | 3  | 0 | 4  | 9  | 1275548  | 9.92E-01 | 1 |
| PKP1     | 758588  | 193 | 23  | 1926316  | 530084  | 0 | 1  | 1  | 0 | 50 | 56 | 22830280 | 9.93E-01 | 1 |
| KIFC2    | 2043455 | 200 | 36  | 2044508  | 714136  | 0 | 6  | 6  | 0 | 2  | 13 | 2164836  | 9.93E-01 | 1 |
| PSMA2    | 163131  | 744 | -6  | 617304   | 167676  | 0 | 1  | 3  | 0 | 3  | 6  | 981492   | 9.93E-01 | 1 |
| GJA4     | 548013  | 580 | 19  | 810256   | 264152  | 0 | 2  | 0  | 0 | 1  | 2  | 468140   | 9.93E-01 | 1 |
| EIF4G1   | 1447013 | 268 | 44  | 4052704  | 1206128 | 0 | 13 | 3  | 0 | 4  | 10 | 2959072  | 9.93E-01 | 1 |
| VANGL2   | 987855  | 526 | 28  | 1294772  | 403348  | 0 | 2  | 4  | 0 | 11 | 14 | 2917064  | 9.93E-01 | 1 |
| TMEM207  | 163494  | 373 | 9   | 377360   | 112852  | 0 | 1  | 2  | 0 | 1  | 3  | 337844   | 9.93E-01 | 1 |
| GGCX     | 1241734 | 170 | 39  | 1934860  | 556784  | 0 | 5  | 4  | 0 | 5  | 9  | 2228204  | 9.93E-01 | 1 |
| MUC6     | 1429028 | 466 | 43  | 5994328  | 1962272 | 0 | 8  | 4  | 0 | 10 | 16 | 7065176  | 9.93E-01 | 1 |
| TTPAL    | 781823  | 276 | 46  | 857604   | 258456  | 0 | 3  | 3  | 0 | 3  | 10 | 1219300  | 9.93E-01 | 1 |



|           |         |     |     |          |         |   |    |    |   |    |    |          |          |   |
|-----------|---------|-----|-----|----------|---------|---|----|----|---|----|----|----------|----------|---|
| RBM44     | 570382  | 407 | 24  | 2752592  | 685300  | 0 | 1  | 0  | 0 | 3  | 4  | 3274844  | 9.93E-01 | 1 |
| CHST6     | 488582  | 225 | 6   | 935568   | 337488  | 0 | 1  | 3  | 0 | 9  | 15 | 2647216  | 9.93E-01 | 1 |
| NEU4      | 598219  | 487 | 29  | 1191532  | 416876  | 0 | 3  | 3  | 0 | 3  | 8  | 1676048  | 9.93E-01 | 1 |
| SEMA4F    | 964055  | 364 | 41  | 1906024  | 619796  | 0 | 2  | 1  | 0 | 26 | 39 | 11425464 | 9.93E-01 | 1 |
| FAM111A   | 542222  | 686 | 9   | 1582064  | 391600  | 0 | 4  | 3  | 0 | 3  | 9  | 1530444  | 9.93E-01 | 1 |
| RAF1      | 408529  | 172 | 32  | 1692780  | 454968  | 0 | 3  | 2  | 0 | 3  | 4  | 1220012  | 9.93E-01 | 1 |
| SH3RF3    | 266032  | 464 | 13  | 1882172  | 626560  | 0 | 1  | 0  | 0 | 4  | 3  | 1726244  | 9.93E-01 | 1 |
| ABCC3     | 1585602 | 196 | 18  | 3909948  | 1203636 | 0 | 11 | 5  | 0 | 29 | 77 | 18114348 | 9.93E-01 | 1 |
| ERMAP     | 811934  | 327 | 28  | 1209332  | 358492  | 0 | 1  | 2  | 0 | 4  | 4  | 1433968  | 9.93E-01 | 1 |
| DCHS1     | 424523  | 491 | 17  | 7819896  | 2831268 | 0 | 19 | 10 | 0 | 35 | 41 | 15296964 | 9.93E-01 | 1 |
| FAM114A2  | 171379  | 592 | 5   | 1316132  | 360628  | 0 | 1  | 0  | 0 | 2  | 1  | 787472   | 9.93E-01 | 1 |
| DNAH9     | 42730   | 859 | -75 | 11500936 | 3168044 | 0 | 27 | 6  | 0 | 1  | 6  | 3481324  | 9.93E-01 | 1 |
| MPP3      | 1053443 | 192 | 27  | 1534716  | 419724  | 0 | 2  | 1  | 0 | 50 | 89 | 20520196 | 9.93E-01 | 1 |
| BACH1     | 315733  | 289 | 60  | 1875764  | 502672  | 0 | 2  | 0  | 0 | 26 | 31 | 8614132  | 9.93E-01 | 1 |
| TLR1      | 310020  | 437 | 58  | 2003924  | 521896  | 0 | 4  | 1  | 0 | 13 | 22 | 5227860  | 9.93E-01 | 1 |
| ADCY10    | 534611  | 238 | 13  | 4260252  | 1038096 | 0 | 16 | 5  | 0 | 19 | 42 | 9864404  | 9.93E-01 | 1 |
| RAD54L2   | 647863  | 387 | 39  | 3710232  | 1082952 | 0 | 5  | 6  | 0 | 12 | 15 | 4881828  | 9.93E-01 | 1 |
| USH1C     | 442495  | 619 | 12  | 2400508  | 677468  | 0 | 2  | 2  | 0 | 6  | 13 | 4877912  | 9.93E-01 | 1 |
| LIPF      | 145689  | 327 | 40  | 1054116  | 262728  | 0 | 5  | 4  | 0 | 2  | 7  | 946604   | 9.93E-01 | 1 |
| ANKFN1    | 184382  | 511 | -53 | 2000720  | 519760  | 0 | 7  | 5  | 0 | 5  | 16 | 2206488  | 9.93E-01 | 1 |
| SCYL1     | 3988328 | 197 | 46  | 2069428  | 597368  | 0 | 1  | 1  | 0 | 29 | 33 | 14530852 | 9.93E-01 | 1 |
| SPPL2B    | 1503606 | 267 | 31  | 1516916  | 470632  | 0 | 1  | 0  | 0 | 0  | 0  | 470632   | 9.93E-01 | 1 |
| JTF2IRD2I | 774871  | 220 | 56  | 2460316  | 647564  | 0 | 3  | 3  | 0 | 50 | 72 | 21683960 | 9.93E-01 | 1 |
| TNRC18    | 1893797 | 256 | 14  | 7230360  | 2401932 | 0 | 9  | 2  | 0 | 2  | 7  | 4265592  | 9.93E-01 | 1 |
| CCDC28A   | 402265  | 482 | 22  | 703812   | 198648  | 0 | 5  | 3  | 0 | 1  | 3  | 357780   | 9.93E-01 | 1 |
| ENPP7     | 633863  | 209 | 31  | 1150592  | 343540  | 0 | 5  | 5  | 0 | 1  | 8  | 849060   | 9.93E-01 | 1 |
| ALPI      | 271362  | 191 | 32  | 1334288  | 405484  | 0 | 2  | 4  | 0 | 2  | 7  | 1221436  | 9.93E-01 | 1 |
| ZNF266    | 408298  | 705 | -45 | 1421864  | 357424  | 0 | 3  | 0  | 0 | 15 | 28 | 5497352  | 9.93E-01 | 1 |
| SOS2      | 778308  | 166 | 46  | 3463168  | 903884  | 0 | 6  | 2  | 0 | 5  | 8  | 2506596  | 9.93E-01 | 1 |
| TDP1      | 296799  | 607 | 12  | 1605560  | 409756  | 0 | 5  | 5  | 0 | 11 | 23 | 3901404  | 9.93E-01 | 1 |
| PLCE1     | 299843  | 633 | 2   | 6181228  | 1635464 | 0 | 8  | 3  | 0 | 7  | 8  | 4461392  | 9.93E-01 | 1 |
| SYNCRIP   | 393389  | 384 | 14  | 1648992  | 440016  | 0 | 1  | 0  | 0 | 6  | 9  | 3223936  | 9.93E-01 | 1 |
| KIAA0408  | 151114  | 811 | -10 | 1795664  | 448204  | 0 | 1  | 0  | 0 | 10 | 10 | 4169472  | 9.93E-01 | 1 |

|          |         |      |     |         |         |   |    |    |   |    |     |          |          |   |
|----------|---------|------|-----|---------|---------|---|----|----|---|----|-----|----------|----------|---|
| SLC16A12 | 249560  | 164  | 13  | 1297264 | 384836  | 0 | 1  | 0  | 0 | 1  | 1   | 745464   | 9.93E-01 | 1 |
| CHDH     | 475623  | 578  | 42  | 1481316 | 454968  | 0 | 1  | 2  | 0 | 50 | 71  | 20802860 | 9.93E-01 | 1 |
| MYO18B   | 198261  | 712  | -37 | 6521208 | 1886088 | 0 | 15 | 8  | 0 | 28 | 51  | 14604188 | 9.93E-01 | 1 |
| CDC42BPE | 824377  | 286  | 43  | 4432912 | 1206128 | 0 | 6  | 7  | 0 | 50 | 70  | 20120408 | 9.93E-01 | 1 |
| PTPN23   | 866535  | 215  | 46  | 4064096 | 1285516 | 0 | 3  | 1  | 0 | 0  | 1   | 1285516  | 9.93E-01 | 1 |
| NOVA1    | 15854   | 883  | -41 | 1263800 | 411892  | 0 | 2  | 2  | 0 | 2  | 4   | 1039876  | 9.93E-01 | 1 |
| ZNF44    | 1474345 | 671  | -10 | 1725888 | 418656  | 0 | 4  | 1  | 0 | 50 | 125 | 23446160 | 9.94E-01 | 1 |
| FAF2     | 592072  | 239  | 47  | 1165188 | 308652  | 0 | 3  | 0  | 0 | 0  | 0   | 308652   | 9.94E-01 | 1 |
| KDELR3   | 1466610 | 215  | 23  | 599860  | 166964  | 0 | 2  | 3  | 0 | 1  | 6   | 500180   | 9.94E-01 | 1 |
| EN1      | 154049  | 576  | -8  | 943756  | 319688  | 0 | 3  | 4  | 0 | 5  | 10  | 1472772  | 9.94E-01 | 1 |
| LAMA1    | 241772  | 228  | -37 | 7948768 | 2173736 | 0 | 25 | 11 | 0 | 6  | 20  | 3839816  | 9.94E-01 | 1 |
| XKR7     | 1006109 | 386  | 37  | 1394096 | 472768  | 0 | 7  | 7  | 0 | 4  | 11  | 1044504  | 9.94E-01 | 1 |
| PRKD1    | 23615   | 1041 | -39 | 2362772 | 635104  | 0 | 7  | 3  | 0 | 1  | 3   | 948384   | 9.94E-01 | 1 |
| AGAP1    | 134111  | 614  | 3   | 2189756 | 631900  | 0 | 4  | 4  | 0 | 16 | 16  | 4088304  | 9.94E-01 | 1 |
| DENND1B  | 206539  | 480  | -21 | 2087584 | 536492  | 0 | 2  | 1  | 0 | 14 | 34  | 9878288  | 9.94E-01 | 1 |
| SLC12A2  | 257189  | 531  | 24  | 3111440 | 886084  | 0 | 6  | 3  | 0 | 3  | 7   | 1915280  | 9.94E-01 | 1 |
| C7orf26  | NaN     | NaN  | NaN | 1119620 | 343540  | 0 | 2  | 5  | 0 | 2  | 9   | 1200076  | 9.94E-01 | 1 |
| TFIP11   | 162673  | 501  | -30 | 2189400 | 551088  | 0 | 2  | 0  | 0 | 4  | 4   | 1895344  | 9.94E-01 | 1 |
| ZNF606   | 1219985 | 694  | -30 | 2076904 | 489500  | 0 | 7  | 3  | 0 | 50 | 120 | 21391328 | 9.94E-01 | 1 |
| C17orf53 | 930750  | 175  | 41  | 1611256 | 503384  | 0 | 1  | 1  | 0 | 43 | 57  | 18154220 | 9.94E-01 | 1 |
| SEMG1    | 842540  | 324  | 25  | 1191176 | 302956  | 0 | 6  | 3  | 0 | 3  | 6   | 850484   | 9.94E-01 | 1 |
| KIAA0922 | 188087  | 454  | 39  | 4208632 | 1100396 | 0 | 9  | 4  | 0 | 50 | 81  | 23911452 | 9.94E-01 | 1 |
| SLC47A2  | 547418  | 219  | -8  | 1532224 | 468140  | 0 | 1  | 2  | 0 | 50 | 80  | 22806784 | 9.94E-01 | 1 |
| PDE3A    | 92407   | 514  | -28 | 2876480 | 848704  | 0 | 9  | 9  | 0 | 7  | 16  | 2515140  | 9.94E-01 | 1 |
| UBE4B    | 749198  | 240  | 25  | 3358860 | 931296  | 0 | 8  | 8  | 0 | 10 | 20  | 4854772  | 9.94E-01 | 1 |
| CRAMP1L  | 1534704 | 320  | 36  | 3152736 | 997512  | 0 | 5  | 1  | 0 | 1  | 2   | 1289076  | 9.94E-01 | 1 |
| C11orf1  | 437513  | 221  | 22  | 402636  | 93984   | 0 | 1  | 2  | 0 | 2  | 2   | 310076   | 9.94E-01 | 1 |
| KIFC3    | 691782  | 148  | 29  | 2118200 | 644716  | 0 | 2  | 0  | 0 | 0  | 0   | 644716   | 9.94E-01 | 1 |
| GLRB     | 44131   | 733  | -34 | 1295840 | 338200  | 0 | 1  | 0  | 0 | 11 | 15  | 4186916  | 9.94E-01 | 1 |
| MRV11    | 755456  | 391  | 21  | 2306524 | 673196  | 0 | 2  | 2  | 0 | 50 | 90  | 30937824 | 9.94E-01 | 1 |
| DDX56    | 1462615 | 191  | 56  | 1389468 | 421860  | 0 | 1  | 0  | 0 | 0  | 0   | 421860   | 9.94E-01 | 1 |
| PCDHB3   | 987049  | 724  | -11 | 1920620 | 632968  | 0 | 9  | 5  | 0 | 3  | 22  | 2510868  | 9.94E-01 | 1 |
| KLHL10   | 1809123 | 171  | 34  | 1562840 | 407620  | 0 | 2  | 1  | 0 | 50 | 96  | 21744124 | 9.94E-01 | 1 |

|          |         |      |     |         |         |   |    |    |   |    |     |          |          |   |
|----------|---------|------|-----|---------|---------|---|----|----|---|----|-----|----------|----------|---|
| ABCB9    | 1093113 | 196  | 47  | 1908872 | 595588  | 0 | 1  | 1  | 0 | 42 | 53  | 19208336 | 9.94E-01 | 1 |
| STAG3    | 1382416 | 198  | 55  | 3201864 | 871488  | 0 | 7  | 3  | 0 | 3  | 4   | 1330372  | 9.94E-01 | 1 |
| PTPRN2   | 248205  | 792  | -33 | 2570676 | 778572  | 0 | 8  | 8  | 0 | 7  | 14  | 3141344  | 9.94E-01 | 1 |
| LINGO2   | 8941    | 927  | -34 | 1500540 | 448560  | 0 | 3  | 4  | 0 | 19 | 38  | 6396252  | 9.94E-01 | 1 |
| PRUNE2   | 178730  | 851  | -15 | 7855496 | 2118556 | 0 | 13 | 6  | 0 | 18 | 26  | 9600252  | 9.94E-01 | 1 |
| SETDB1   | 1688656 | 172  | 31  | 3315784 | 913496  | 0 | 12 | 8  | 0 | 7  | 23  | 3592396  | 9.94E-01 | 1 |
| SAMD9    | 362550  | 625  | 8   | 4063384 | 1035248 | 0 | 12 | 8  | 0 | 34 | 49  | 12981540 | 9.94E-01 | 1 |
| CELF2    | 96767   | 864  | 5   | 1420796 | 380920  | 0 | 5  | 4  | 0 | 1  | 5   | 758636   | 9.94E-01 | 1 |
| ANKRD30F | NaN     | NaN  | NaN | 3713080 | 899612  | 0 | 4  | 1  | 0 | 9  | 17  | 5257052  | 9.94E-01 | 1 |
| NBPF6    | NaN     | NaN  | NaN | 1743688 | 459596  | 0 | 1  | 0  | 0 | 50 | 116 | 40105180 | 9.94E-01 | 1 |
| HDAC5    | 923807  | 171  | 32  | 2858680 | 849416  | 0 | 3  | 2  | 0 | 4  | 5   | 2289792  | 9.94E-01 | 1 |
| ZNF473   | 1643218 | 222  | 35  | 2251700 | 559276  | 0 | 6  | 1  | 0 | 0  | 1   | 559276   | 9.94E-01 | 1 |
| CCNA2    | 324357  | 506  | 29  | 1107872 | 309364  | 0 | 2  | 2  | 0 | 3  | 6   | 1258816  | 9.94E-01 | 1 |
| CHST5    | 488582  | 225  | 6   | 978644  | 341404  | 0 | 1  | 2  | 0 | 9  | 15  | 2647216  | 9.94E-01 | 1 |
| NTRK2    | 17424   | 692  | 1   | 2244224 | 592384  | 0 | 7  | 4  | 0 | 1  | 4   | 905664   | 9.94E-01 | 1 |
| PLEKHG4F | 836250  | 543  | 14  | 3184776 | 965472  | 0 | 8  | 3  | 0 | 10 | 23  | 5652568  | 9.94E-01 | 1 |
| C2orf78  | 1124858 | 404  | 43  | 2274128 | 691708  | 0 | 3  | 4  | 0 | 50 | 76  | 19904316 | 9.94E-01 | 1 |
| REG1A    | 10958   | 1389 | -22 | 449272  | 107156  | 0 | 6  | 2  | 0 | 2  | 7   | 338912   | 9.94E-01 | 1 |
| ADPRHL1  | 808201  | 223  | 49  | 917412  | 247776  | 0 | 1  | 3  | 0 | 5  | 7   | 1598084  | 9.94E-01 | 1 |
| MOS      | 344171  | 552  | 20  | 829836  | 280884  | 0 | 2  | 1  | 0 | 3  | 8   | 1127452  | 9.94E-01 | 1 |
| PAPLN    | 525540  | 269  | 45  | 3183352 | 934856  | 0 | 5  | 2  | 0 | 7  | 11  | 3741204  | 9.94E-01 | 1 |
| TM6SF2   | 940952  | 232  | 17  | 966540  | 285156  | 0 | 2  | 3  | 0 | 1  | 4   | 621220   | 9.94E-01 | 1 |
| HPS5     | 601817  | 252  | 37  | 2930236 | 784268  | 0 | 2  | 2  | 0 | 50 | 58  | 23220812 | 9.94E-01 | 1 |
| SKI      | 788773  | 262  | 30  | 1782848 | 580636  | 0 | 1  | 2  | 0 | 50 | 66  | 22647652 | 9.94E-01 | 1 |
| SCN10A   | 304612  | 680  | 21  | 4988628 | 1394808 | 0 | 15 | 5  | 0 | 0  | 5   | 1394808  | 9.94E-01 | 1 |
| GEMIN5   | 519919  | 378  | 40  | 3894996 | 1057320 | 0 | 7  | 5  | 0 | 23 | 33  | 8239264  | 9.94E-01 | 1 |
| HIVEP1   | 210548  | 453  | 33  | 6756880 | 1985768 | 0 | 16 | 4  | 0 | 2  | 7   | 2444652  | 9.94E-01 | 1 |
| PCDHA5   | 896676  | 606  | -12 | 2364196 | 754364  | 0 | 6  | 4  | 0 | 50 | 135 | 24247872 | 9.94E-01 | 1 |
| GRIN3B   | 2387949 | 206  | 26  | 2485948 | 895340  | 0 | 2  | 0  | 0 | 2  | 7   | 3122476  | 9.94E-01 | 1 |
| DOPEY2   | 267887  | 232  | 65  | 5830568 | 1689220 | 0 | 24 | 12 | 0 | 3  | 17  | 2855476  | 9.94E-01 | 1 |
| POLA1    | 255855  | NaN  | 22  | 3873280 | 970100  | 0 | 4  | 1  | 0 | 12 | 11  | 5438612  | 9.94E-01 | 1 |
| SLC15A4  | 34588   | 1027 | -23 | 1425068 | 458884  | 0 | 1  | 2  | 0 | 50 | 107 | 24998320 | 9.94E-01 | 1 |
| C16orf58 | 826452  | 688  | -17 | 1200788 | 357424  | 0 | 3  | 0  | 0 | 13 | 53  | 7539724  | 9.94E-01 | 1 |

|          |         |      |     |          |         |   |    |    |   |    |    |          |          |   |
|----------|---------|------|-----|----------|---------|---|----|----|---|----|----|----------|----------|---|
| PABPC1L  | 952219  | 282  | 32  | 1578148  | 454256  | 0 | 1  | 2  | 0 | 50 | 67 | 20264944 | 9.94E-01 | 1 |
| LMBRD1   | 42273   | 983  | -2  | 1426136  | 371308  | 0 | 1  | 2  | 0 | 50 | 90 | 19887228 | 9.94E-01 | 1 |
| AP3D1    | 1712606 | 216  | 30  | 3153448  | 836600  | 0 | 8  | 4  | 0 | 5  | 11 | 2872920  | 9.94E-01 | 1 |
| ANKHD1   | NaN     | NaN  | NaN | 6468520  | 1931300 | 0 | 1  | 0  | 0 | 0  | 0  | 1931300  | 9.95E-01 | 1 |
| SYVN1    | 3292261 | 168  | 50  | 1564264  | 479888  | 0 | 1  | 2  | 0 | 50 | 69 | 20640168 | 9.95E-01 | 1 |
| ZNF16    | 1539444 | 440  | 23  | 1749740  | 447136  | 0 | 3  | 5  | 0 | 4  | 9  | 1628344  | 9.95E-01 | 1 |
| TRANK1   | 391968  | 523  | 0   | 7455708  | 2013180 | 0 | 21 | 6  | 0 | 6  | 18 | 5452140  | 9.95E-01 | 1 |
| HERC2    | 219134  | 1011 | -32 | 12305852 | 3578512 | 0 | 28 | 13 | 0 | 8  | 29 | 7457844  | 9.95E-01 | 1 |
| RARG     | 1677275 | 191  | 49  | 1279108  | 372020  | 0 | 14 | 6  | 0 | 0  | 6  | 372020   | 9.95E-01 | 1 |
| FLT4     | 855370  | 515  | 13  | 3508024  | 994664  | 0 | 9  | 8  | 0 | 15 | 25 | 6479912  | 9.95E-01 | 1 |
| CCNF     | 2161773 | 309  | 44  | 2015316  | 576720  | 0 | 6  | 6  | 0 | 13 | 22 | 4142772  | 9.95E-01 | 1 |
| C16orf93 | 1632278 | 158  | 61  | 771096   | 208260  | 0 | 1  | 3  | 0 | 2  | 7  | 1266648  | 9.95E-01 | 1 |
| FGD4     | 357808  | 378  | -9  | 2005704  | 515844  | 0 | 3  | 0  | 0 | 0  | 0  | 515844   | 9.95E-01 | 1 |
| ETV3     | 895723  | 423  | 31  | 1306164  | 386616  | 0 | 1  | 0  | 0 | 4  | 8  | 2274128  | 9.95E-01 | 1 |
| FBXW5    | 1979517 | 188  | 34  | 1420796  | 430048  | 0 | 1  | 1  | 0 | 50 | 78 | 21046364 | 9.95E-01 | 1 |
| NPR1     | 1656449 | 183  | 40  | 2670356  | 822004  | 0 | 3  | 1  | 0 | 12 | 12 | 4249216  | 9.95E-01 | 1 |
| MYO7A    | 442776  | 450  | 42  | 5747264  | 1592032 | 0 | 12 | 5  | 0 | 50 | 66 | 24494224 | 9.95E-01 | 1 |
| LTBP3    | 3945819 | 202  | 45  | 3347112  | 946248  | 0 | 4  | 4  | 0 | 19 | 25 | 9711324  | 9.95E-01 | 1 |
| NLGN2    | 1906324 | 206  | 33  | 2032760  | 673552  | 0 | 2  | 3  | 0 | 50 | 87 | 23542992 | 9.95E-01 | 1 |
| OR10AG1  | 4262    | 1044 | -40 | 751160   | 215380  | 0 | 1  | 2  | 0 | 5  | 12 | 1863660  | 9.95E-01 | 1 |
| PCDHA13  | NaN     | NaN  | NaN | 2335716  | 755076  | 0 | 9  | 9  | 0 | 4  | 13 | 2059816  | 9.95E-01 | 1 |
| HOOK3    | 478917  | 475  | 25  | 1933792  | 459596  | 0 | 1  | 2  | 0 | 5  | 8  | 3434688  | 9.95E-01 | 1 |
| ACSBG2   | 1332100 | 417  | 40  | 1745824  | 451052  | 0 | 5  | 1  | 0 | 0  | 1  | 451052   | 9.95E-01 | 1 |
| CDKL5    | 66108   | NaN  | 25  | 2667864  | 718764  | 0 | 2  | 2  | 0 | 17 | 19 | 7678564  | 9.95E-01 | 1 |
| PTCH2    | 656648  | 191  | 36  | 2993604  | 975084  | 0 | 2  | 2  | 0 | 29 | 35 | 14305504 | 9.95E-01 | 1 |
| CLSTN1   | 614159  | 177  | 31  | 2542908  | 680316  | 0 | 4  | 3  | 0 | 35 | 47 | 12765448 | 9.95E-01 | 1 |
| NOVA2    | 866240  | 261  | 42  | 1176936  | 417588  | 0 | 2  | 2  | 0 | 4  | 6  | 1282312  | 9.95E-01 | 1 |
| IGSF8    | 829863  | 386  | 17  | 1466720  | 526168  | 0 | 1  | 0  | 0 | 1  | 1  | 819156   | 9.95E-01 | 1 |
| BDKRB2   | 330952  | 500  | 10  | 975796   | 288716  | 0 | 2  | 3  | 0 | 1  | 4  | 791744   | 9.95E-01 | 1 |
| COL4A6   | 171617  | NaN  | 31  | 4233908  | 1390180 | 0 | 5  | 3  | 0 | 29 | 33 | 12825968 | 9.95E-01 | 1 |
| ZFPM1    | 626557  | 184  | 37  | 2439312  | 827700  | 0 | 1  | 1  | 0 | 36 | 33 | 15230036 | 9.95E-01 | 1 |
| USP6     | 1391000 | 384  | 20  | 3668936  | 961912  | 0 | 9  | 5  | 0 | 50 | 83 | 22837756 | 9.95E-01 | 1 |
| PITRM1   | 266524  | 438  | 16  | 2723756  | 715204  | 0 | 1  | 1  | 0 | 14 | 11 | 6479556  | 9.95E-01 | 1 |

|           |         |      |     |         |         |   |    |   |   |    |    |          |          |   |
|-----------|---------|------|-----|---------|---------|---|----|---|---|----|----|----------|----------|---|
| FN3KRP    | 855855  | 243  | 21  | 797440  | 219296  | 0 | 1  | 3 | 0 | 5  | 7  | 1242796  | 9.95E-01 | 1 |
| NFRSF11L  | 145370  | 264  | 42  | 1570316 | 447136  | 0 | 1  | 1 | 0 | 50 | 80 | 20614536 | 9.95E-01 | 1 |
| ERMP1     | 314189  | 313  | 25  | 2301896 | 659668  | 0 | 1  | 1 | 0 | 3  | 10 | 4558580  | 9.95E-01 | 1 |
| PIK3C2G   | 24982   | 986  | -31 | 3814896 | 950520  | 0 | 7  | 2 | 0 | 11 | 22 | 5432204  | 9.95E-01 | 1 |
| SLC44A2   | 2082774 | 226  | 33  | 1880392 | 511928  | 0 | 9  | 2 | 0 | 0  | 2  | 511928   | 9.95E-01 | 1 |
| AIRE      | 1153513 | 308  | 65  | 1599508 | 510860  | 0 | 1  | 1 | 0 | 18 | 20 | 6199384  | 9.95E-01 | 1 |
| ARHGEF6   | 306872  | NaN  | 39  | 2049848 | 529372  | 0 | 6  | 1 | 0 | 4  | 7  | 1479892  | 9.95E-01 | 1 |
| PACSN2    | 627533  | 222  | 56  | 1289432 | 313636  | 0 | 3  | 3 | 0 | 1  | 5  | 814172   | 9.95E-01 | 1 |
| FAM76B    | 298879  | 467  | 2   | 917768  | 210040  | 0 | 1  | 2 | 0 | 1  | 3  | 532576   | 9.95E-01 | 1 |
| AIM1      | 220264  | 271  | 41  | 4379512 | 1225352 | 0 | 10 | 3 | 0 | 1  | 3  | 1511932  | 9.95E-01 | 1 |
| TALDO1    | 1788356 | 193  | 48  | 876472  | 238520  | 0 | 3  | 4 | 0 | 3  | 8  | 1043792  | 9.95E-01 | 1 |
| ZBTB40    | 440712  | 555  | 28  | 3184776 | 860808  | 0 | 5  | 8 | 0 | 26 | 24 | 7881128  | 9.95E-01 | 1 |
| CCDC62    | 1009828 | 184  | 40  | 1844792 | 454612  | 0 | 4  | 3 | 0 | 1  | 3  | 783200   | 9.95E-01 | 1 |
| ABCB11    | 223582  | 560  | 1   | 3412260 | 938772  | 0 | 4  | 1 | 0 | 2  | 3  | 1559992  | 9.95E-01 | 1 |
| FOXL1     | 47545   | 445  | 10  | 824852  | 283732  | 0 | 1  | 2 | 0 | 1  | 3  | 673908   | 9.95E-01 | 1 |
| GLB1L     | 694442  | 193  | 44  | 1688152 | 478820  | 0 | 1  | 1 | 0 | 50 | 75 | 22905396 | 9.95E-01 | 1 |
| USP36     | 854363  | 214  | 27  | 2852984 | 825208  | 0 | 4  | 4 | 0 | 50 | 72 | 20992252 | 9.95E-01 | 1 |
| LHFPL5    | 621095  | 404  | 34  | 556784  | 160912  | 0 | 3  | 3 | 0 | 2  | 3  | 315772   | 9.95E-01 | 1 |
| AEBP1     | 1151124 | 282  | 56  | 2958360 | 840516  | 0 | 5  | 3 | 0 | 50 | 90 | 23246444 | 9.95E-01 | 1 |
| OR13J1    | 847663  | 227  | 54  | 749024  | 252760  | 0 | 1  | 3 | 0 | 2  | 3  | 664296   | 9.95E-01 | 1 |
| CAPZA3    | 82407   | 911  | -29 | 763976  | 199360  | 0 | 1  | 2 | 0 | 9  | 19 | 2976872  | 9.95E-01 | 1 |
| ZNF516    | 113406  | 813  | 18  | 2854052 | 893560  | 0 | 7  | 4 | 0 | 1  | 4  | 1292992  | 9.95E-01 | 1 |
| VILL      | 318742  | 457  | 24  | 2213252 | 611608  | 0 | 5  | 6 | 0 | 5  | 16 | 3672140  | 9.95E-01 | 1 |
| PRAMEF8   | 62200   | 792  | 6   | 3545760 | 1058388 | 0 | 3  | 1 | 0 | 17 | 22 | 10083344 | 9.96E-01 | 1 |
| CYLD      | 279624  | 792  | 2   | 2486660 | 647920  | 0 | 2  | 2 | 0 | 40 | 43 | 15605972 | 9.96E-01 | 1 |
| COL18A1   | 513400  | 481  | 41  | 4413688 | 1498760 | 0 | 5  | 5 | 0 | 50 | 60 | 23189484 | 9.96E-01 | 1 |
| TGM2      | 565545  | 141  | 41  | 1791748 | 498044  | 0 | 1  | 3 | 0 | 12 | 13 | 4660752  | 9.96E-01 | 1 |
| C14orf159 | 240206  | 471  | 35  | 1579572 | 464580  | 0 | 1  | 4 | 0 | 18 | 25 | 7372048  | 9.96E-01 | 1 |
| ABCA5     | 52620   | 314  | -50 | 4335012 | 1091496 | 0 | 8  | 4 | 0 | 14 | 23 | 6143492  | 9.96E-01 | 1 |
| POTEE     | 462125  | NaN  | 11  | 2798872 | 710576  | 0 | 4  | 3 | 0 | 50 | 94 | 26072372 | 9.96E-01 | 1 |
| OR51A4    | 65798   | 1006 | -15 | 768960  | 234960  | 0 | 1  | 4 | 0 | 4  | 8  | 1185480  | 9.96E-01 | 1 |
| HIVEP3    | 190045  | 457  | 27  | 5849436 | 1883952 | 0 | 19 | 7 | 0 | 15 | 20 | 5422592  | 9.96E-01 | 1 |
| ZNF43     | 123927  | 1235 | -66 | 2111080 | 496976  | 0 | 5  | 3 | 0 | 34 | 64 | 11960532 | 9.96E-01 | 1 |

|          |         |      |     |         |         |   |    |   |   |    |    |          |          |   |
|----------|---------|------|-----|---------|---------|---|----|---|---|----|----|----------|----------|---|
| RBM12    | 1423559 | 169  | 53  | 2278044 | 715560  | 0 | 1  | 1 | 0 | 15 | 12 | 5442528  | 9.96E-01 | 1 |
| FIBP     | 3779084 | 287  | 42  | 948384  | 259524  | 0 | 1  | 1 | 0 | 2  | 2  | 667856   | 9.96E-01 | 1 |
| RAP2B    | 59808   | 598  | -2  | 456036  | 133500  | 0 | 1  | 3 | 0 | 1  | 6  | 633324   | 9.96E-01 | 1 |
| MEM132I  | 32086   | 969  | -33 | 2763984 | 794592  | 0 | 16 | 8 | 0 | 4  | 15 | 2233188  | 9.96E-01 | 1 |
| ANKS6    | 298496  | 375  | 12  | 2165548 | 690284  | 0 | 1  | 3 | 0 | 50 | 56 | 22224368 | 9.96E-01 | 1 |
| POLR2A   | 1931875 | 194  | 29  | 4960148 | 1474552 | 0 | 11 | 4 | 0 | 16 | 31 | 8361372  | 9.96E-01 | 1 |
| KCNH8    | 25033   | 1018 | -14 | 2834116 | 779996  | 0 | 14 | 7 | 0 | 1  | 9  | 1265224  | 9.96E-01 | 1 |
| ZNF250   | 1539444 | 440  | 23  | 1441800 | 377004  | 0 | 4  | 3 | 0 | 4  | 9  | 1628344  | 9.96E-01 | 1 |
| RGAG1    | 100181  | NaN  | 21  | 3346044 | 1112856 | 0 | 4  | 4 | 0 | 27 | 38 | 12767228 | 9.96E-01 | 1 |
| ADARB1   | 596496  | 250  | 42  | 1874696 | 557140  | 0 | 2  | 3 | 0 | 4  | 5  | 1750808  | 9.96E-01 | 1 |
| PTPRB    | 159250  | 454  | -26 | 5737652 | 1567468 | 0 | 13 | 7 | 0 | 28 | 55 | 14822060 | 9.96E-01 | 1 |
| PRR12    | 1906661 | 195  | 38  | 4859044 | 1723040 | 0 | 4  | 3 | 0 | 18 | 19 | 8233568  | 9.96E-01 | 1 |
| ESPL1    | 1677275 | 191  | 49  | 5261680 | 1662164 | 0 | 16 | 7 | 0 | 2  | 9  | 2217524  | 9.96E-01 | 1 |
| PCDHB12  | 915569  | 724  | -11 | 1932724 | 617660  | 0 | 10 | 6 | 0 | 1  | 12 | 1248492  | 9.96E-01 | 1 |
| ODF2L    | 218105  | 874  | -18 | 1883240 | 420436  | 0 | 1  | 1 | 0 | 46 | 72 | 20795384 | 9.96E-01 | 1 |
| ALOX15B  | 1528802 | 272  | 26  | 1715920 | 508724  | 0 | 1  | 2 | 0 | 50 | 58 | 18618800 | 9.96E-01 | 1 |
| NRIP1    | 103852  | 526  | 8   | 2914928 | 798508  | 0 | 6  | 4 | 0 | 7  | 15 | 3877908  | 9.96E-01 | 1 |
| TRHDE    | 66026   | 995  | -40 | 2636536 | 726596  | 0 | 11 | 4 | 0 | 5  | 13 | 1971172  | 9.96E-01 | 1 |
| VPS18    | 1036414 | 172  | 51  | 2391252 | 746532  | 0 | 3  | 1 | 0 | 10 | 13 | 3963348  | 9.96E-01 | 1 |
| GCNT2    | 254228  | 404  | 13  | 2568540 | 704880  | 0 | 1  | 2 | 0 | 36 | 44 | 18231472 | 9.96E-01 | 1 |
| NBAS     | 186706  | 1405 | 10  | 6161648 | 1658248 | 0 | 9  | 4 | 0 | 35 | 44 | 15288064 | 9.96E-01 | 1 |
| PSORS1C1 | 3178076 | 283  | 21  | 392312  | 114988  | 0 | 3  | 1 | 0 | 0  | 1  | 114988   | 9.96E-01 | 1 |
| ZDHHC1   | 1115833 | 153  | 42  | 1219656 | 380208  | 0 | 3  | 3 | 0 | 2  | 6  | 841940   | 9.96E-01 | 1 |
| CTSW     | 3779084 | 287  | 42  | 980068  | 268424  | 0 | 1  | 1 | 0 | 2  | 2  | 676756   | 9.96E-01 | 1 |
| CCR10    | 1740597 | 177  | 36  | 838380  | 331080  | 0 | 1  | 4 | 0 | 2  | 13 | 1860456  | 9.96E-01 | 1 |
| ZHX1     | 545561  | 171  | 22  | 2203284 | 601284  | 0 | 1  | 2 | 0 | 50 | 60 | 20198016 | 9.96E-01 | 1 |
| SF3B2    | 3581017 | 208  | 47  | 2320052 | 642580  | 0 | 5  | 4 | 0 | 3  | 6  | 1404064  | 9.96E-01 | 1 |
| MLH3     | 897430  | 222  | 50  | 3738712 | 971168  | 0 | 5  | 3 | 0 | 48 | 62 | 21588908 | 9.96E-01 | 1 |
| SARM1    | 1407654 | 189  | 19  | 1777508 | 579568  | 0 | 1  | 1 | 0 | 20 | 27 | 8197256  | 9.96E-01 | 1 |
| TRAPPC10 | 860750  | 202  | 62  | 3244940 | 886084  | 0 | 7  | 2 | 0 | 0  | 2  | 886084   | 9.96E-01 | 1 |
| GAL3ST3  | 3581017 | 208  | 47  | 1035248 | 353152  | 0 | 1  | 1 | 0 | 3  | 6  | 1404064  | 9.96E-01 | 1 |
| OSGIN1   | 387177  | 550  | -6  | 1383772 | 439304  | 0 | 1  | 2 | 0 | 4  | 6  | 1756148  | 9.96E-01 | 1 |
| AATK     | 1737949 | 243  | 22  | 3352808 | 1110364 | 0 | 5  | 1 | 0 | 3  | 9  | 2959428  | 9.96E-01 | 1 |

|         |         |      |     |          |         |   |    |    |   |    |    |          |          |   |
|---------|---------|------|-----|----------|---------|---|----|----|---|----|----|----------|----------|---|
| MPPE1   | 323758  | 148  | 39  | 1026348  | 284088  | 0 | 2  | 3  | 0 | 1  | 4  | 813460   | 9.96E-01 | 1 |
| B4GALT4 | 248430  | 588  | 3   | 892492   | 234248  | 0 | 3  | 3  | 0 | 1  | 3  | 495908   | 9.96E-01 | 1 |
| TIPARP  | 407941  | 502  | 22  | 1698120  | 431472  | 0 | 5  | 1  | 0 | 0  | 1  | 431472   | 9.96E-01 | 1 |
| SLC39A4 | 2043455 | 200  | 36  | 1676760  | 573516  | 0 | 2  | 0  | 0 | 2  | 7  | 2024216  | 9.96E-01 | 1 |
| MMP24   | 1290513 | 170  | 45  | 1436104  | 402992  | 0 | 1  | 3  | 0 | 27 | 43 | 10380248 | 9.96E-01 | 1 |
| HSPG2   | 481189  | 179  | 27  | 11063412 | 3420804 | 0 | 24 | 10 | 0 | 3  | 10 | 3634760  | 9.96E-01 | 1 |
| CAPN5   | 403200  | 395  | 38  | 1644720  | 460308  | 0 | 3  | 4  | 0 | 1  | 12 | 1880392  | 9.96E-01 | 1 |
| ATP13A5 | 141358  | 851  | 1   | 3184064  | 843364  | 0 | 7  | 6  | 0 | 7  | 12 | 2939136  | 9.96E-01 | 1 |
| SNX22   | 743794  | 251  | 43  | 508724   | 140620  | 0 | 3  | 4  | 0 | 1  | 5  | 297260   | 9.96E-01 | 1 |
| ARFIP1  | 218185  | 385  | 33  | 974372   | 258100  | 0 | 1  | 2  | 0 | 8  | 17 | 2775376  | 9.96E-01 | 1 |
| MCPH1   | 128440  | 702  | 9   | 2169820  | 572804  | 0 | 4  | 0  | 0 | 4  | 7  | 2039880  | 9.96E-01 | 1 |
| C1R     | 2459343 | 195  | 45  | 1546464  | 417588  | 0 | 1  | 0  | 0 | 2  | 4  | 1577080  | 9.96E-01 | 1 |
| KCNU1   | 7048    | 474  | -36 | 2988620  | 809188  | 0 | 8  | 6  | 0 | 5  | 12 | 2263092  | 9.96E-01 | 1 |
| DNAH1   | 1095946 | 229  | 55  | 10992212 | 3007132 | 0 | 24 | 11 | 0 | 18 | 42 | 10916028 | 9.96E-01 | 1 |
| TRIM65  | 1727802 | 178  | 35  | 1274480  | 408688  | 0 | 1  | 2  | 0 | 17 | 36 | 7482408  | 9.96E-01 | 1 |
| TAS1R1  | 628180  | 259  | 38  | 2157716  | 563548  | 0 | 2  | 5  | 0 | 26 | 45 | 12018560 | 9.97E-01 | 1 |
| ADAM28  | 55817   | 565  | 5   | 2133864  | 506232  | 0 | 1  | 1  | 0 | 50 | 69 | 25885472 | 9.97E-01 | 1 |
| SERINC2 | 748895  | 262  | 28  | 1164120  | 335352  | 0 | 1  | 3  | 0 | 6  | 13 | 2986128  | 9.97E-01 | 1 |
| PIGV    | 1022828 | 188  | 30  | 1210044  | 385548  | 0 | 3  | 4  | 0 | 3  | 8  | 1202924  | 9.97E-01 | 1 |
| CCDC108 | 872634  | 324  | 36  | 5059116  | 1410828 | 0 | 13 | 6  | 0 | 12 | 33 | 7794264  | 9.97E-01 | 1 |
| RAB3A   | 1178047 | 210  | 43  | 573160   | 149876  | 0 | 2  | 3  | 0 | 1  | 4  | 445000   | 9.97E-01 | 1 |
| ENGASE  | 592461  | 285  | 15  | 1872916  | 568532  | 0 | 3  | 2  | 0 | 0  | 2  | 568532   | 9.97E-01 | 1 |
| OLFML2A | 1076828 | 207  | 26  | 1633684  | 488432  | 0 | 1  | 2  | 0 | 50 | 76 | 19654760 | 9.97E-01 | 1 |
| EHF     | 1039672 | 320  | 12  | 815596   | 182984  | 0 | 3  | 3  | 0 | 6  | 17 | 1717700  | 9.97E-01 | 1 |
| HEATR5B | 614688  | 281  | 16  | 5233912  | 1554296 | 0 | 13 | 3  | 0 | 1  | 6  | 1925604  | 9.97E-01 | 1 |
| STIM1   | 409663  | 476  | 31  | 1763980  | 480956  | 0 | 1  | 0  | 0 | 1  | 0  | 614456   | 9.97E-01 | 1 |
| CTNND2  | 15425   | 1060 | -13 | 3090080  | 927736  | 0 | 13 | 8  | 0 | 1  | 8  | 1241016  | 9.97E-01 | 1 |
| HLX     | 177316  | 564  | -2  | 1197228  | 382344  | 0 | 2  | 4  | 0 | 4  | 8  | 1575300  | 9.97E-01 | 1 |
| BTBD16  | 218081  | 303  | -3  | 1346748  | 343896  | 0 | 1  | 3  | 0 | 10 | 14 | 3539708  | 9.97E-01 | 1 |
| ZNF256  | 1252385 | 750  | -19 | 1619800  | 402992  | 0 | 3  | 4  | 0 | 17 | 37 | 7252076  | 9.97E-01 | 1 |
| FANCI   | 642890  | 400  | 25  | 3509804  | 908512  | 0 | 11 | 4  | 0 | 6  | 14 | 3241736  | 9.97E-01 | 1 |
| VIPR1   | 355160  | 527  | 21  | 1187616  | 331080  | 0 | 1  | 3  | 0 | 4  | 8  | 1746180  | 9.97E-01 | 1 |
| TRPV4   | 825887  | 423  | 41  | 2206488  | 651480  | 0 | 5  | 5  | 0 | 5  | 10 | 2463164  | 9.97E-01 | 1 |

|          |         |      |     |          |         |   |    |    |   |    |    |          |          |   |
|----------|---------|------|-----|----------|---------|---|----|----|---|----|----|----------|----------|---|
| SLCO3A1  | 70107   | 867  | -8  | 1849776  | 557496  | 0 | 2  | 4  | 0 | 6  | 12 | 3107880  | 9.97E-01 | 1 |
| NLRP11   | 991833  | 362  | -35 | 2637960  | 713424  | 0 | 7  | 2  | 0 | 10 | 16 | 3583852  | 9.97E-01 | 1 |
| MFSD4    | 694640  | 268  | 35  | 1287296  | 403348  | 0 | 2  | 2  | 0 | 9  | 18 | 3063380  | 9.97E-01 | 1 |
| ZMYND19  | 1315685 | 404  | 41  | 590604   | 161268  | 0 | 2  | 0  | 0 | 0  | 0  | 161268   | 9.97E-01 | 1 |
| CR1      | 442029  | 361  | 18  | 6453212  | 1721260 | 0 | 11 | 2  | 0 | 3  | 5  | 2300828  | 9.97E-01 | 1 |
| CELSR1   | 467110  | 260  | 11  | 7464608  | 2340700 | 0 | 19 | 12 | 0 | 13 | 36 | 7963720  | 9.97E-01 | 1 |
| ZNF83    | 563874  | 1010 | -41 | 1335356  | 321112  | 0 | 1  | 0  | 0 | 3  | 6  | 1635464  | 9.97E-01 | 1 |
| CLCN1    | 379715  | 379  | 29  | 2527244  | 739768  | 0 | 8  | 4  | 0 | 3  | 7  | 1614104  | 9.97E-01 | 1 |
| RBMY1E   | NaN     | NaN  | NaN | 3865092  | 1053048 | 0 | 2  | 0  | 0 | 0  | 0  | 1053048  | 9.97E-01 | 1 |
| CPSF3L   | 1744013 | 273  | 28  | 1566400  | 429692  | 0 | 1  | 1  | 0 | 9  | 14 | 4108596  | 9.97E-01 | 1 |
| C6orf15  | 2992134 | 283  | 23  | 785692   | 263084  | 0 | 2  | 2  | 0 | 1  | 3  | 378072   | 9.97E-01 | 1 |
| KIAA0141 | 696239  | 321  | 48  | 1309012  | 394448  | 0 | 2  | 3  | 0 | 3  | 9  | 1813820  | 9.97E-01 | 1 |
| AKAP13   | 230754  | 454  | 17  | 7237124  | 2007484 | 0 | 14 | 8  | 0 | 28 | 30 | 11215424 | 9.97E-01 | 1 |
| DNAJC11  | 623016  | 259  | 34  | 1455684  | 404772  | 0 | 4  | 3  | 0 | 1  | 3  | 770028   | 9.97E-01 | 1 |
| ACSL4    | 209488  | NaN  | 44  | 1851912  | 484872  | 0 | 1  | 1  | 0 | 50 | 79 | 25041040 | 9.97E-01 | 1 |
| MEGF6    | 250204  | 251  | 15  | 4008204  | 1086156 | 0 | 4  | 5  | 0 | 50 | 49 | 18153152 | 9.97E-01 | 1 |
| AGBL2    | 984490  | 155  | 23  | 2372028  | 595944  | 0 | 5  | 1  | 0 | 15 | 38 | 8802456  | 9.97E-01 | 1 |
| DDX60L   | 134820  | 238  | -11 | 4507672  | 1115348 | 0 | 9  | 3  | 0 | 4  | 6  | 2191180  | 9.97E-01 | 1 |
| ZFP64    | 145657  | 427  | -8  | 2741556  | 734784  | 0 | 1  | 2  | 0 | 50 | 47 | 20178080 | 9.97E-01 | 1 |
| INPP4A   | 212473  | 623  | 41  | 2683172  | 747244  | 0 | 3  | 1  | 0 | 0  | 1  | 747244   | 9.97E-01 | 1 |
| CWF19L2  | 147499  | 853  | -10 | 2388760  | 553580  | 0 | 3  | 0  | 0 | 1  | 2  | 909580   | 9.97E-01 | 1 |
| CACNA2D1 | 639042  | 259  | 57  | 3038104  | 820580  | 0 | 2  | 2  | 0 | 50 | 63 | 21319772 | 9.97E-01 | 1 |
| VPS13A   | 186200  | 696  | -2  | 8458560  | 2149884 | 0 | 11 | 3  | 0 | 4  | 5  | 3171604  | 9.97E-01 | 1 |
| ANK2     | 237324  | 911  | 14  | 10067680 | 2879684 | 0 | 44 | 12 | 0 | 0  | 12 | 2879684  | 9.97E-01 | 1 |
| TBC1D9   | 146110  | 621  | 8   | 3263808  | 881100  | 0 | 6  | 6  | 0 | 10 | 14 | 4065876  | 9.97E-01 | 1 |
| ADAMTSL1 | 1475649 | 152  | 31  | 2722688  | 874336  | 0 | 5  | 3  | 0 | 12 | 30 | 7579240  | 9.97E-01 | 1 |
| MCHR2    | 258745  | 719  | -16 | 873268   | 240656  | 0 | 2  | 4  | 0 | 3  | 6  | 885728   | 9.97E-01 | 1 |
| EPN1     | 1050871 | 254  | -11 | 1698476  | 552868  | 0 | 1  | 3  | 0 | 8  | 8  | 2559640  | 9.97E-01 | 1 |
| COL6A1   | 764197  | 590  | 23  | 2655048  | 789252  | 0 | 2  | 4  | 0 | 50 | 92 | 27167784 | 9.97E-01 | 1 |
| NCBP1    | 495483  | 358  | 36  | 2111080  | 517268  | 0 | 2  | 1  | 0 | 50 | 59 | 18737348 | 9.97E-01 | 1 |
| WLS      | 331085  | 524  | -20 | 1526528  | 389464  | 0 | 1  | 1  | 0 | 14 | 40 | 9423676  | 9.97E-01 | 1 |
| MCM3     | 313097  | 427  | 23  | 2086516  | 573872  | 0 | 1  | 2  | 0 | 39 | 44 | 16330076 | 9.97E-01 | 1 |
| CCNA1    | 197057  | 880  | 1   | 1184768  | 342472  | 0 | 4  | 3  | 0 | 1  | 3  | 568176   | 9.97E-01 | 1 |



|          |         |     |     |          |         |   |    |    |   |    |    |          |          |   |
|----------|---------|-----|-----|----------|---------|---|----|----|---|----|----|----------|----------|---|
| TBC1D25  | 772147  | NaN | 16  | 1686372  | 542544  | 0 | 2  | 1  | 0 | 3  | 3  | 1075832  | 9.97E-01 | 1 |
| VWA1     | 1736268 | 273 | 28  | 1077256  | 360272  | 0 | 1  | 4  | 0 | 5  | 11 | 2076904  | 9.97E-01 | 1 |
| BZRAP1   | 810333  | 399 | 19  | 4624084  | 1461380 | 0 | 9  | 9  | 0 | 15 | 25 | 7565712  | 9.97E-01 | 1 |
| FAM110B  | 190462  | 601 | 15  | 913852   | 274832  | 0 | 5  | 2  | 0 | 0  | 2  | 274832   | 9.97E-01 | 1 |
| TRPC4    | 72221   | 573 | -19 | 2516564  | 675688  | 0 | 18 | 6  | 0 | 0  | 6  | 675688   | 9.97E-01 | 1 |
| FRMD1    | 142012  | 702 | -17 | 1416524  | 402280  | 0 | 1  | 1  | 0 | 9  | 20 | 4699200  | 9.97E-01 | 1 |
| VDAC2    | 208687  | 275 | 38  | 846568   | 222500  | 0 | 3  | 2  | 0 | 1  | 3  | 443932   | 9.97E-01 | 1 |
| DIAPH1   | 696745  | 502 | 14  | 3292288  | 901748  | 0 | 5  | 1  | 0 | 0  | 1  | 901748   | 9.97E-01 | 1 |
| TBC1D10E | 2312884 | 165 | 47  | 1956220  | 672128  | 0 | 1  | 2  | 0 | 44 | 52 | 17331148 | 9.97E-01 | 1 |
| STXBP2   | 688482  | 384 | 31  | 1544684  | 439660  | 0 | 1  | 0  | 0 | 3  | 2  | 995020   | 9.97E-01 | 1 |
| METTL7A  | 569122  | 220 | 40  | 615168   | 174084  | 0 | 2  | 3  | 0 | 2  | 3  | 382344   | 9.97E-01 | 1 |
| RABEP1   | 1246822 | 382 | 24  | 2275908  | 561768  | 0 | 2  | 2  | 0 | 50 | 69 | 21505960 | 9.97E-01 | 1 |
| PCDHA2   | 861651  | 606 | 2   | 2374520  | 771808  | 0 | 8  | 6  | 0 | 5  | 30 | 3429704  | 9.97E-01 | 1 |
| ENTPD1   | 370896  | 631 | 30  | 1417948  | 359204  | 0 | 1  | 3  | 0 | 2  | 8  | 1413320  | 9.97E-01 | 1 |
| ADNP     | 386595  | 367 | 36  | 2806704  | 740124  | 0 | 6  | 2  | 0 | 1  | 2  | 922752   | 9.97E-01 | 1 |
| OR2Y1    | 831824  | 515 | 18  | 754720   | 244928  | 0 | 1  | 1  | 0 | 1  | 2  | 469564   | 9.97E-01 | 1 |
| BCL6     | 88374   | 374 | 24  | 1796732  | 502672  | 0 | 3  | 1  | 0 | 0  | 1  | 502672   | 9.97E-01 | 1 |
| SLC1A5   | 1166804 | 224 | 36  | 1311148  | 460664  | 0 | 1  | 3  | 0 | 5  | 7  | 1788900  | 9.97E-01 | 1 |
| ELAVL1   | 967479  | 369 | 19  | 838380   | 230688  | 0 | 6  | 4  | 0 | 1  | 4  | 268068   | 9.97E-01 | 1 |
| TXNRD2   | 648548  | 197 | 18  | 1352800  | 408332  | 0 | 1  | 3  | 0 | 2  | 3  | 1040588  | 9.97E-01 | 1 |
| ACSL3    | 261505  | 361 | 14  | 1872560  | 497332  | 0 | 2  | 0  | 0 | 0  | 0  | 497332   | 9.97E-01 | 1 |
| FLVCR2   | 656924  | 248 | 50  | 1330372  | 396584  | 0 | 4  | 5  | 0 | 3  | 8  | 1345324  | 9.97E-01 | 1 |
| KDM4A    | 939679  | 209 | 34  | 2772884  | 729088  | 0 | 6  | 6  | 0 | 9  | 15 | 3433264  | 9.97E-01 | 1 |
| PDE6C    | 461114  | 305 | 19  | 2276976  | 564972  | 0 | 2  | 1  | 0 | 1  | 1  | 871844   | 9.97E-01 | 1 |
| KIF4A    | 243320  | NaN | 45  | 3248500  | 830192  | 0 | 3  | 2  | 0 | 50 | 71 | 23272788 | 9.97E-01 | 1 |
| BBS7     | 324357  | 506 | 29  | 1890004  | 484160  | 0 | 6  | 2  | 0 | 3  | 6  | 1258816  | 9.97E-01 | 1 |
| PHLPP2   | 451025  | 366 | 17  | 3343196  | 973660  | 0 | 5  | 5  | 0 | 35 | 46 | 13940248 | 9.97E-01 | 1 |
| IRS1     | 146164  | 493 | -3  | 3023508  | 965472  | 0 | 7  | 4  | 0 | 12 | 18 | 4361712  | 9.97E-01 | 1 |
| USP9X    | 734477  | NaN | 38  | 6693868  | 1727312 | 0 | 11 | 3  | 0 | 2  | 5  | 2392676  | 9.97E-01 | 1 |
| GGH      | 137738  | 789 | -12 | 846568   | 209684  | 0 | 2  | 2  | 0 | 2  | 5  | 731580   | 9.97E-01 | 1 |
| RNASET2  | 225834  | 633 | 18  | 686368   | 173372  | 0 | 1  | 2  | 0 | 3  | 2  | 421860   | 9.98E-01 | 1 |
| TUBB1    | 978901  | 125 | 28  | 1144896  | 316128  | 0 | 1  | 3  | 0 | 21 | 41 | 7643676  | 9.98E-01 | 1 |
| SYNE2    | 525935  | 430 | 41  | 18196940 | 4477768 | 0 | 47 | 13 | 0 | 26 | 41 | 15430820 | 9.98E-01 | 1 |

|          |         |     |     |          |         |   |    |    |   |    |    |          |          |   |
|----------|---------|-----|-----|----------|---------|---|----|----|---|----|----|----------|----------|---|
| VPS13B   | 209453  | 862 | 27  | 10492032 | 2861172 | 0 | 28 | 14 | 0 | 19 | 38 | 11482780 | 9.98E-01 | 1 |
| TBL3     | 1747301 | 183 | 46  | 2056256  | 629764  | 0 | 4  | 2  | 0 | 1  | 2  | 781064   | 9.98E-01 | 1 |
| DNAJC16  | 636573  | 188 | 34  | 2029912  | 538628  | 0 | 9  | 4  | 0 | 2  | 7  | 1049132  | 9.98E-01 | 1 |
| CUBN     | 529248  | 641 | -4  | 9405520  | 2489864 | 0 | 47 | 14 | 0 | 0  | 14 | 2489864  | 9.98E-01 | 1 |
| RUVBL2   | 1998663 | 190 | 39  | 1202924  | 347812  | 0 | 1  | 4  | 0 | 7  | 15 | 3171960  | 9.98E-01 | 1 |
| CD3G     | 963668  | 192 | 48  | 493416   | 120684  | 0 | 1  | 2  | 0 | 2  | 2  | 326452   | 9.98E-01 | 1 |
| TF       | 489558  | 523 | 26  | 1830552  | 477396  | 0 | 4  | 5  | 0 | 14 | 18 | 3692432  | 9.98E-01 | 1 |
| KIAA1462 | 184440  | 520 | 12  | 3376304  | 993952  | 0 | 7  | 5  | 0 | 5  | 8  | 2404424  | 9.98E-01 | 1 |
| LTBR     | 2686552 | 198 | 48  | 1108228  | 327164  | 0 | 3  | 2  | 0 | 0  | 2  | 327164   | 9.98E-01 | 1 |
| CACNA1G  | 1559131 | 196 | 19  | 6182652  | 1877544 | 0 | 14 | 3  | 0 | 9  | 29 | 7424024  | 9.98E-01 | 1 |
| EIF2AK4  | 806826  | 256 | 26  | 4311516  | 1139556 | 0 | 11 | 5  | 0 | 4  | 11 | 2631196  | 9.98E-01 | 1 |
| TLR6     | 316028  | 437 | 75  | 2030980  | 526880  | 0 | 4  | 2  | 0 | 4  | 6  | 1656112  | 9.98E-01 | 1 |
| SLC7A4   | 577297  | 192 | 58  | 1524392  | 530440  | 0 | 2  | 5  | 0 | 18 | 35 | 6734096  | 9.98E-01 | 1 |
| TLN2     | 315754  | 568 | 15  | 6490236  | 1892496 | 0 | 10 | 9  | 0 | 18 | 29 | 9811360  | 9.98E-01 | 1 |
| XPO7     | 489191  | 222 | 26  | 2883956  | 775012  | 0 | 6  | 2  | 0 | 2  | 2  | 895696   | 9.98E-01 | 1 |
| F12      | 1038665 | 261 | 59  | 1573164  | 458172  | 0 | 3  | 6  | 0 | 3  | 8  | 1205416  | 9.98E-01 | 1 |
| CALHM1   | 542721  | 170 | 51  | 844788   | 271272  | 0 | 1  | 3  | 0 | 3  | 6  | 999292   | 9.98E-01 | 1 |
| ZNF552   | 884988  | 781 | -38 | 1053404  | 262372  | 0 | 3  | 3  | 0 | 2  | 7  | 1077612  | 9.98E-01 | 1 |
| ABLIM2   | 172573  | 230 | 36  | 1758996  | 451764  | 0 | 1  | 2  | 0 | 50 | 66 | 18353936 | 9.98E-01 | 1 |
| LAMP2    | 475981  | NaN | 26  | 1291924  | 365612  | 0 | 2  | 1  | 0 | 2  | 1  | 486296   | 9.98E-01 | 1 |
| GNAS     | 1025539 | 416 | 11  | 3822372  | 503028  | 0 | 6  | 3  | 0 | 50 | 58 | 13537968 | 9.98E-01 | 1 |
| RNF219   | 58504   | 954 | 4   | 1875764  | 477040  | 0 | 5  | 2  | 0 | 0  | 2  | 477040   | 9.98E-01 | 1 |
| MYBPC3   | 1189866 | 245 | 45  | 3285880  | 939128  | 0 | 4  | 2  | 0 | 2  | 2  | 1305096  | 9.98E-01 | 1 |
| KCNC3    | 1072052 | 528 | 26  | 1830908  | 614812  | 0 | 1  | 3  | 0 | 50 | 63 | 18767608 | 9.98E-01 | 1 |
| PTX4     | 1254229 | 256 | 34  | 1129232  | 396940  | 0 | 1  | 4  | 0 | 4  | 10 | 2143476  | 9.98E-01 | 1 |
| JAG2     | 872033  | 260 | 25  | 3186200  | 890356  | 0 | 1  | 0  | 0 | 11 | 8  | 4424724  | 9.98E-01 | 1 |
| DRD5     | 207324  | 923 | 30  | 1173376  | 358136  | 0 | 2  | 4  | 0 | 1  | 5  | 980780   | 9.98E-01 | 1 |
| GNAZ     | NaN     | NaN | NaN | 891068   | 253828  | 0 | 2  | 4  | 0 | 2  | 8  | 1110364  | 9.98E-01 | 1 |
| SLCO4A1  | 1254192 | 192 | 24  | 1797444  | 566040  | 0 | 4  | 4  | 0 | 1  | 4  | 821648   | 9.98E-01 | 1 |
| TCF7L2   | 156660  | 435 | -9  | 1793884  | 489500  | 0 | 1  | 4  | 0 | 1  | 6  | 1400504  | 9.98E-01 | 1 |
| DPEP2    | 863919  | 158 | 54  | 1222504  | 380564  | 0 | 2  | 3  | 0 | 2  | 7  | 1254544  | 9.98E-01 | 1 |
| SON      | 908921  | 375 | 68  | 6191552  | 1908160 | 0 | 7  | 2  | 0 | 0  | 2  | 1908160  | 9.98E-01 | 1 |
| LRRIQ1   | 25069   | 946 | -28 | 4558224  | 1075476 | 0 | 19 | 3  | 0 | 5  | 13 | 2446432  | 9.98E-01 | 1 |

|          |         |      |     |          |         |   |    |    |   |    |     |          |          |   |
|----------|---------|------|-----|----------|---------|---|----|----|---|----|-----|----------|----------|---|
| IDS      | 179393  | NaN  | 3   | 1430764  | 400856  | 0 | 5  | 1  | 0 | 0  | 1   | 400856   | 9.98E-01 | 1 |
| MB       | 936853  | 205  | -13 | 406196   | 105376  | 0 | 1  | 3  | 0 | 1  | 4   | 358136   | 9.98E-01 | 1 |
| OBSL1    | 548994  | 487  | 35  | 4748328  | 1573164 | 0 | 6  | 4  | 0 | 40 | 56  | 20065584 | 9.98E-01 | 1 |
| HECTD3   | 939872  | 310  | 20  | 2196520  | 652904  | 0 | 5  | 3  | 0 | 1  | 4   | 933788   | 9.98E-01 | 1 |
| CLN6     | 376180  | 365  | 33  | 792456   | 232824  | 0 | 3  | 2  | 0 | 0  | 2   | 232824   | 9.98E-01 | 1 |
| PPP1R13L | 1269856 | 191  | 31  | 2037388  | 669992  | 0 | 2  | 4  | 0 | 32 | 56  | 13921736 | 9.98E-01 | 1 |
| ANKRD13C | 295772  | 396  | -1  | 1411540  | 376292  | 0 | 4  | 4  | 0 | 3  | 8   | 1379856  | 9.98E-01 | 1 |
| CCR5     | 243983  | 625  | 36  | 881456   | 253828  | 0 | 4  | 4  | 0 | 1  | 4   | 510504   | 9.98E-01 | 1 |
| MKX      | 283178  | 535  | 0   | 905308   | 251336  | 0 | 1  | 4  | 0 | 4  | 7   | 1072628  | 9.98E-01 | 1 |
| C10orf71 | NaN     | NaN  | NaN | 3610552  | 1084376 | 0 | 3  | 2  | 0 | 50 | 118 | 40729960 | 9.98E-01 | 1 |
| ZNF136   | 1114898 | 721  | -14 | 1406912  | 341404  | 0 | 3  | 2  | 0 | 50 | 149 | 24457912 | 9.98E-01 | 1 |
| CBX4     | 647412  | 242  | -2  | 1395876  | 418656  | 0 | 8  | 4  | 0 | 0  | 4   | 418656   | 9.98E-01 | 1 |
| TULP4    | 669285  | 403  | 41  | 3828780  | 1173732 | 0 | 14 | 6  | 0 | 3  | 9   | 2036320  | 9.98E-01 | 1 |
| NOD1     | 623997  | 400  | 37  | 2393032  | 706304  | 0 | 5  | 3  | 0 | 5  | 11  | 2478828  | 9.98E-01 | 1 |
| MFGE8    | 562979  | 560  | 7   | 995376   | 277680  | 0 | 5  | 4  | 0 | 1  | 4   | 552868   | 9.98E-01 | 1 |
| FNDC3B   | 327135  | 466  | 25  | 3110016  | 857604  | 0 | 11 | 4  | 0 | 1  | 4   | 1076188  | 9.98E-01 | 1 |
| ENDOU    | 395089  | 320  | 14  | 1097192  | 258100  | 0 | 1  | 3  | 0 | 4  | 7   | 1579572  | 9.98E-01 | 1 |
| FAT3     | 32222   | 1011 | -33 | 11407308 | 3301188 | 0 | 46 | 15 | 0 | 1  | 16  | 3838748  | 9.98E-01 | 1 |
| AMY1A    | NaN     | NaN  | NaN | 4035972  | 1021008 | 0 | 2  | 0  | 0 | 0  | 0   | 1021008  | 9.98E-01 | 1 |
| EHMT1    | 977227  | 583  | 38  | 3388408  | 936992  | 0 | 2  | 5  | 0 | 50 | 43  | 18730940 | 9.98E-01 | 1 |
| ACLY     | 1857838 | 191  | 33  | 2853340  | 797084  | 0 | 6  | 9  | 0 | 7  | 24  | 3634048  | 9.98E-01 | 1 |
| PCDHA3   | 861651  | 606  | 2   | 2376300  | 765756  | 0 | 5  | 2  | 0 | 0  | 2   | 765756   | 9.98E-01 | 1 |
| PPIP5K1  | 794398  | 269  | 37  | 3788196  | 1062660 | 0 | 3  | 2  | 0 | 10 | 21  | 7868312  | 9.98E-01 | 1 |
| RSPH10B2 | 974099  | 506  | 41  | 4631916  | 1111788 | 0 | 4  | 1  | 0 | 19 | 27  | 11907844 | 9.98E-01 | 1 |
| SCN7A    | 68529   | 918  | -11 | 4383072  | 1111788 | 0 | 7  | 3  | 0 | 43 | 66  | 22503472 | 9.98E-01 | 1 |
| TRAPPC9  | 327071  | 689  | 16  | 3170536  | 920972  | 0 | 2  | 2  | 0 | 27 | 35  | 13514116 | 9.98E-01 | 1 |
| KRTCAP2  | 1801444 | 194  | 32  | 413672   | 129940  | 0 | 1  | 2  | 0 | 2  | 4   | 372376   | 9.98E-01 | 1 |
| CKAP2L   | 595832  | 214  | 47  | 1907804  | 518692  | 0 | 1  | 1  | 0 | 18 | 30  | 9369920  | 9.98E-01 | 1 |
| ITPR1    | 290645  | 395  | 19  | 7207576  | 1888580 | 0 | 11 | 2  | 0 | 1  | 3   | 2122828  | 9.98E-01 | 1 |
| GTSE1    | 506667  | 205  | 35  | 1836248  | 581704  | 0 | 6  | 5  | 0 | 1  | 5   | 788540   | 9.98E-01 | 1 |
| UQCRC2   | 646330  | 424  | 43  | 1176580  | 333572  | 0 | 5  | 2  | 0 | 0  | 2   | 333572   | 9.98E-01 | 1 |
| HMMR     | 225981  | 603  | 11  | 1954796  | 443932  | 0 | 3  | 1  | 0 | 0  | 1   | 443932   | 9.98E-01 | 1 |
| PER2     | 349323  | 252  | 28  | 3220020  | 898188  | 0 | 6  | 5  | 0 | 3  | 13  | 2886804  | 9.98E-01 | 1 |

|          |         |      |     |          |          |   |     |    |   |    |     |          |          |   |
|----------|---------|------|-----|----------|----------|---|-----|----|---|----|-----|----------|----------|---|
| KCNA1    | 260795  | 903  | 12  | 1234608  | 354576   | 0 | 9   | 6  | 0 | 1  | 7   | 588824   | 9.98E-01 | 1 |
| ACAN     | 561599  | 560  | -1  | 6134948  | 2047000  | 0 | 15  | 11 | 0 | 13 | 23  | 6879700  | 9.98E-01 | 1 |
| ZNF814   | NaN     | NaN  | NaN | 2216100  | 535068   | 0 | 1   | 1  | 0 | 50 | 117 | 40180652 | 9.98E-01 | 1 |
| PRAMEF6  | NaN     | NaN  | NaN | 2397304  | 684944   | 0 | 1   | 1  | 0 | 50 | 117 | 40330528 | 9.98E-01 | 1 |
| EGFL6    | 196762  | NaN  | 49  | 1460668  | 364544   | 0 | 2   | 0  | 0 | 0  | 0   | 364544   | 9.98E-01 | 1 |
| ZNF142   | 1033606 | 269  | 43  | 4196528  | 1241728  | 0 | 5   | 4  | 0 | 50 | 68  | 23381368 | 9.98E-01 | 1 |
| NDUFA10  | 271696  | 569  | 17  | 941620   | 239588   | 0 | 3   | 2  | 0 | 1  | 3   | 473836   | 9.98E-01 | 1 |
| NOMO3    | 368918  | 346  | 15  | 3148820  | 897832   | 0 | 1   | 0  | 0 | 4  | 3   | 2248852  | 9.98E-01 | 1 |
| DENND1A  | 314875  | 517  | 32  | 2636892  | 801000   | 0 | 1   | 4  | 0 | 19 | 24  | 8270236  | 9.98E-01 | 1 |
| RASGRF2  | 214755  | 766  | 29  | 3217884  | 859740   | 0 | 5   | 7  | 0 | 10 | 16  | 4143128  | 9.98E-01 | 1 |
| ZCCHC2   | 164923  | 286  | 44  | 2925252  | 907800   | 0 | 3   | 2  | 0 | 10 | 12  | 4498416  | 9.98E-01 | 1 |
| GOLGA3   | 861960  | 601  | 21  | 3930596  | 1111432  | 0 | 14  | 4  | 0 | 0  | 4   | 1111432  | 9.98E-01 | 1 |
| ITGAD    | 839076  | 558  | 11  | 2988620  | 860452   | 0 | 4   | 3  | 0 | 35 | 62  | 15935984 | 9.98E-01 | 1 |
| MEX3C    | 146631  | 570  | 45  | 1583844  | 535068   | 0 | 2   | 0  | 0 | 2  | 3   | 939128   | 9.98E-01 | 1 |
| MXRA5    | 223878  | NaN  | -28 | 6974040  | 2115708  | 0 | 19  | 8  | 0 | 5  | 19  | 4933448  | 9.98E-01 | 1 |
| HELQ     | 330595  | 378  | 40  | 2847288  | 756144   | 0 | 3   | 2  | 0 | 2  | 2   | 959064   | 9.98E-01 | 1 |
| IQGAP1   | 1142649 | 150  | 37  | 4348184  | 1124248  | 0 | 8   | 5  | 0 | 1  | 6   | 1490216  | 9.98E-01 | 1 |
| DOCK5    | 178665  | 512  | 14  | 4952672  | 1259884  | 0 | 4   | 3  | 0 | 14 | 13  | 5964068  | 9.98E-01 | 1 |
| URGCP    | 872910  | 239  | 44  | 2324680  | 684944   | 0 | 5   | 5  | 0 | 2  | 6   | 913496   | 9.98E-01 | 1 |
| PGAP1    | 549386  | 370  | 17  | 2429700  | 638664   | 0 | 4   | 2  | 0 | 0  | 2   | 638664   | 9.98E-01 | 1 |
| TFR2     | 1884430 | 247  | 60  | 2021368  | 623000   | 0 | 1   | 0  | 0 | 0  | 0   | 623000   | 9.98E-01 | 1 |
| EXOGL    | 373229  | 578  | 28  | 944824   | 260948   | 0 | 2   | 1  | 0 | 0  | 1   | 260948   | 9.98E-01 | 1 |
| CACNA1I  | 725838  | 466  | 60  | 5580300  | 1699188  | 0 | 8   | 4  | 0 | 11 | 13  | 4505892  | 9.98E-01 | 1 |
| KIAA1958 | 459178  | 374  | 11  | 1789968  | 520116   | 0 | 2   | 1  | 0 | 1  | 4   | 1230692  | 9.98E-01 | 1 |
| YEATS2   | 1447754 | 410  | 26  | 3614824  | 1072628  | 0 | 10  | 5  | 0 | 4  | 15  | 2888940  | 9.98E-01 | 1 |
| SLC7A8   | 1257542 | 168  | 41  | 1348884  | 411180   | 0 | 2   | 4  | 0 | 2  | 4   | 681384   | 9.98E-01 | 1 |
| SH3RF2   | 396248  | 406  | -7  | 1803496  | 569600   | 0 | 2   | 5  | 0 | 7  | 19  | 4186916  | 9.99E-01 | 1 |
| TTN      | 172693  | 713  | 23  | 92721624 | 26303772 | 0 | 301 | 89 | 0 | 12 | 99  | 30308772 | 9.99E-01 | 1 |
| PCDHGB7  | 662513  | 568  | 2   | 2287656  | 715560   | 0 | 3   | 1  | 0 | 0  | 1   | 715560   | 9.99E-01 | 1 |
| NFKB2    | 975992  | 178  | 39  | 2271280  | 709508   | 0 | 1   | 4  | 0 | 14 | 24  | 7562508  | 9.99E-01 | 1 |
| 'OM121L1 | 10922   | 1116 | -24 | 714492   | 239232   | 0 | 7   | 4  | 0 | 0  | 4   | 239232   | 9.99E-01 | 1 |
| KIAA1598 | 202512  | 533  | -14 | 1689220  | 404060   | 0 | 1   | 0  | 0 | 12 | 18  | 4860468  | 9.99E-01 | 1 |
| CAPN1    | 3317462 | 168  | 54  | 1871492  | 508012   | 0 | 2   | 5  | 0 | 11 | 22  | 4645800  | 9.99E-01 | 1 |

|         |         |      |     |          |         |   |    |    |   |    |     |          |          |   |
|---------|---------|------|-----|----------|---------|---|----|----|---|----|-----|----------|----------|---|
| DBNL    | 1096873 | 226  | 52  | 1158068  | 305092  | 0 | 2  | 3  | 0 | 2  | 5   | 896408   | 9.99E-01 | 1 |
| REG1B   | 10958   | 1389 | -22 | 448560   | 107868  | 0 | 4  | 3  | 0 | 2  | 7   | 338912   | 9.99E-01 | 1 |
| ARMC9   | 1157442 | 394  | 41  | 1759708  | 459596  | 0 | 2  | 4  | 0 | 28 | 45  | 9794272  | 9.99E-01 | 1 |
| C6orf25 | 2517236 | 193  | 20  | 683876   | 160912  | 0 | 1  | 1  | 0 | 1  | 1   | 292276   | 9.99E-01 | 1 |
| DACT3   | 1139694 | 347  | 28  | 1474908  | 558564  | 0 | 1  | 1  | 0 | 1  | 1   | 651480   | 9.99E-01 | 1 |
| POLR1B  | 563286  | 166  | 34  | 2907452  | 792100  | 0 | 3  | 2  | 0 | 32 | 43  | 11993640 | 9.99E-01 | 1 |
| NEFH    | 723458  | 203  | 35  | 2543264  | 742972  | 0 | 4  | 1  | 0 | 0  | 1   | 742972   | 9.99E-01 | 1 |
| NLRP12  | 783610  | 486  | -58 | 2742624  | 803136  | 0 | 4  | 6  | 0 | 43 | 115 | 27683628 | 9.99E-01 | 1 |
| OTUB1   | 1322584 | 277  | 42  | 715204   | 181916  | 0 | 1  | 2  | 0 | 2  | 2   | 396940   | 9.99E-01 | 1 |
| ADAMTS7 | 507164  | 413  | 46  | 4194036  | 1309368 | 0 | 5  | 3  | 0 | 12 | 16  | 5722700  | 9.99E-01 | 1 |
| SYT14   | 223343  | 547  | -5  | 1616240  | 410824  | 0 | 6  | 4  | 0 | 1  | 4   | 609828   | 9.99E-01 | 1 |
| ABCA8   | 295848  | 637  | -41 | 4138500  | 1088292 | 0 | 16 | 8  | 0 | 4  | 18  | 2486304  | 9.99E-01 | 1 |
| ZYX     | 379715  | 379  | 29  | 1430052  | 447492  | 0 | 2  | 1  | 0 | 3  | 7   | 1614104  | 9.99E-01 | 1 |
| INTU    | 211890  | 437  | -11 | 2425428  | 661092  | 0 | 3  | 1  | 0 | 2  | 3   | 1202212  | 9.99E-01 | 1 |
| OR4F17  | 250228  | 708  | 5   | 755432   | 224992  | 0 | 1  | 0  | 0 | 0  | 0   | 224992   | 9.99E-01 | 1 |
| ARID3B  | 655453  | 206  | 59  | 1407624  | 423996  | 0 | 5  | 4  | 0 | 2  | 5   | 804204   | 9.99E-01 | 1 |
| OR2T8   | 87551   | 993  | -35 | 763264   | 237452  | 0 | 1  | 3  | 0 | 4  | 10  | 1329304  | 9.99E-01 | 1 |
| ZBTB22  | 1456953 | 262  | 30  | 1516204  | 522608  | 0 | 10 | 7  | 0 | 3  | 16  | 1502676  | 9.99E-01 | 1 |
| C4A     | NaN     | NaN  | NaN | 8346776  | 2480608 | 0 | 1  | 0  | 0 | 0  | 0   | 2480608  | 9.99E-01 | 1 |
| OPN3    | 172337  | 341  | -13 | 991460   | 312568  | 0 | 1  | 3  | 0 | 2  | 5   | 952300   | 9.99E-01 | 1 |
| ETV1    | 46434   | 989  | -16 | 1329660  | 320400  | 0 | 10 | 4  | 0 | 1  | 7   | 629052   | 9.99E-01 | 1 |
| MAP3K15 | 222229  | NaN  | 38  | 3402648  | 927024  | 0 | 3  | 5  | 0 | 5  | 8   | 2542552  | 9.99E-01 | 1 |
| LENG8   | 807048  | 535  | -7  | 2039168  | 591316  | 0 | 2  | 3  | 0 | 50 | 83  | 18359276 | 9.99E-01 | 1 |
| CECR2   | 424899  | 390  | -46 | 3646864  | 1051268 | 0 | 7  | 2  | 0 | 4  | 7   | 2375588  | 9.99E-01 | 1 |
| KRT81   | 742854  | 178  | 53  | 1283024  | 374512  | 0 | 1  | 0  | 0 | 2  | 4   | 1093988  | 9.99E-01 | 1 |
| FER1L5  | 906473  | 234  | 41  | 5495572  | 1435748 | 0 | 5  | 1  | 0 | 0  | 1   | 1435748  | 9.99E-01 | 1 |
| ELOVL5  | 379445  | 287  | 27  | 790320   | 200784  | 0 | 2  | 1  | 0 | 1  | 2   | 269492   | 9.99E-01 | 1 |
| OR2A7   | 209930  | 767  | -5  | 755432   | 239944  | 0 | 1  | 2  | 0 | 1  | 4   | 643648   | 9.99E-01 | 1 |
| ZNF235  | 661800  | 671  | -34 | 1927740  | 457104  | 0 | 4  | 4  | 0 | 2  | 6   | 1366328  | 9.99E-01 | 1 |
| ATXN3   | 356163  | 415  | 27  | 989324   | 215380  | 0 | 5  | 2  | 0 | 1  | 2   | 290852   | 9.99E-01 | 1 |
| AARS2   | 1037256 | 312  | 54  | 2456400  | 794592  | 0 | 2  | 3  | 0 | 44 | 60  | 16584260 | 9.99E-01 | 1 |
| RYR3    | 140241  | 806  | -13 | 12692112 | 3356724 | 0 | 48 | 18 | 0 | 2  | 20  | 4075488  | 9.99E-01 | 1 |
| HM13    | 741997  | 309  | -33 | 1154152  | 341048  | 0 | 1  | 1  | 0 | 0  | 1   | 341048   | 9.99E-01 | 1 |

|           |         |      |     |         |         |   |    |   |   |    |    |          |          |   |
|-----------|---------|------|-----|---------|---------|---|----|---|---|----|----|----------|----------|---|
| CLDN14    | 391816  | 428  | 78  | 576720  | 196512  | 0 | 1  | 4 | 0 | 2  | 6  | 660380   | 9.99E-01 | 1 |
| OR10G8    | 158396  | 830  | -10 | 753652  | 245996  | 0 | 3  | 3 | 0 | 1  | 5  | 493772   | 9.99E-01 | 1 |
| NTS       | 22180   | 677  | -32 | 454256  | 106444  | 0 | 5  | 2 | 0 | 0  | 2  | 106444   | 9.99E-01 | 1 |
| SGSM1     | 365627  | 308  | -21 | 2984704 | 803492  | 0 | 2  | 2 | 0 | 50 | 67 | 22639820 | 9.99E-01 | 1 |
| MYH14     | 1215275 | 528  | 26  | 5139216 | 1566756 | 0 | 6  | 6 | 0 | 38 | 60 | 19974804 | 9.99E-01 | 1 |
| MRPL20    | 1736268 | 273  | 28  | 385548  | 110004  | 0 | 1  | 3 | 0 | 1  | 3  | 269848   | 9.99E-01 | 1 |
| ZNF248    | 142662  | 979  | -22 | 1520476 | 354932  | 0 | 2  | 3 | 0 | 4  | 6  | 995376   | 9.99E-01 | 1 |
| ZNF20     | 1025728 | 728  | -15 | 1389468 | 331080  | 0 | 2  | 0 | 0 | 14 | 59 | 8376680  | 9.99E-01 | 1 |
| CTNNA2    | 10595   | 1614 | -24 | 2153800 | 599504  | 0 | 22 | 8 | 0 | 0  | 8  | 599504   | 9.99E-01 | 1 |
| C2        | 2400153 | 188  | 35  | 2184416 | 596656  | 0 | 1  | 0 | 0 | 4  | 5  | 2119624  | 9.99E-01 | 1 |
| ZNF609    | 841050  | 278  | 43  | 3533300 | 1024924 | 0 | 4  | 2 | 0 | 24 | 40 | 12377052 | 9.99E-01 | 1 |
| PCDHB15   | 800016  | 708  | -15 | 1892496 | 632256  | 0 | 8  | 5 | 0 | 6  | 22 | 2779292  | 9.99E-01 | 1 |
| GBA2      | 922448  | 190  | 48  | 2378080 | 663584  | 0 | 1  | 2 | 0 | 31 | 42 | 12963384 | 9.99E-01 | 1 |
| TM6GALNAc | 259709  | 989  | -11 | 802424  | 207904  | 0 | 3  | 3 | 0 | 1  | 4  | 442152   | 9.99E-01 | 1 |
| TMED3     | 259115  | 736  | 19  | 548596  | 160556  | 0 | 1  | 1 | 0 | 0  | 1  | 160556   | 9.99E-01 | 1 |
| PRAMEF5   | NaN     | NaN  | NaN | 2399440 | 682808  | 0 | 2  | 0 | 0 | 7  | 14 | 4370968  | 9.99E-01 | 1 |
| NAIP      | 329526  | 581  | 16  | 3771464 | 991816  | 0 | 2  | 2 | 0 | 9  | 21 | 6698496  | 9.99E-01 | 1 |
| ASPM      | 221779  | 614  | -25 | 8929904 | 2328952 | 0 | 24 | 6 | 0 | 2  | 9  | 2971888  | 9.99E-01 | 1 |
| GCKR      | 1193266 | 306  | 39  | 1623004 | 461732  | 0 | 5  | 3 | 0 | 1  | 4  | 646140   | 9.99E-01 | 1 |
| ANO7      | 1333138 | 317  | 35  | 2451060 | 719832  | 0 | 4  | 6 | 0 | 11 | 25 | 5699916  | 9.99E-01 | 1 |
| FAM166B   | 1108352 | 300  | 27  | 556428  | 162336  | 0 | 1  | 1 | 0 | 0  | 1  | 162336   | 9.99E-01 | 1 |
| SLC5A2    | 832764  | 558  | -3  | 1680676 | 533288  | 0 | 2  | 4 | 0 | 34 | 63 | 13258864 | 9.99E-01 | 1 |
| NRG2      | 749094  | 290  | 57  | 2184416 | 677824  | 0 | 1  | 1 | 0 | 18 | 19 | 5902480  | 9.99E-01 | 1 |
| GPRC6A    | 232554  | 730  | -15 | 2363840 | 631900  | 0 | 5  | 1 | 0 | 3  | 3  | 1000360  | 9.99E-01 | 1 |
| DCAF12L2  | 11596   | NaN  | -29 | 1117484 | 369172  | 0 | 8  | 4 | 0 | 1  | 9  | 701676   | 9.99E-01 | 1 |
| PCM1      | 381765  | 253  | 2   | 5334304 | 1311860 | 0 | 3  | 1 | 0 | 14 | 15 | 8425452  | 9.99E-01 | 1 |
| OR4C11    | 1141    | 1100 | -37 | 777860  | 216448  | 0 | 2  | 4 | 0 | 2  | 7  | 697760   | 9.99E-01 | 1 |
| RNF123    | 1551582 | 271  | 48  | 3389120 | 986476  | 0 | 12 | 9 | 0 | 3  | 16 | 2340700  | 9.99E-01 | 1 |
| LPAR1     | 247269  | 624  | 21  | 914564  | 264508  | 0 | 3  | 1 | 0 | 0  | 1  | 264508   | 9.99E-01 | 1 |
| BRD1      | 644644  | 276  | -18 | 2673916 | 766112  | 0 | 5  | 5 | 0 | 14 | 29 | 6698852  | 9.99E-01 | 1 |
| ASH2L     | 671169  | 258  | 34  | 1652196 | 431472  | 0 | 1  | 1 | 0 | 1  | 1  | 699184   | 9.99E-01 | 1 |
| POR       | 1063656 | 218  | 54  | 1753300 | 492704  | 0 | 1  | 3 | 0 | 19 | 38 | 9233572  | 9.99E-01 | 1 |
| SYNPO     | 1119691 | 198  | 51  | 2766476 | 950164  | 0 | 2  | 3 | 0 | 49 | 69 | 19376012 | 9.99E-01 | 1 |

|           |         |     |     |          |         |   |    |    |   |    |     |          |          |   |
|-----------|---------|-----|-----|----------|---------|---|----|----|---|----|-----|----------|----------|---|
| GIPR      | 950605  | 194 | 45  | 1186548  | 365256  | 0 | 4  | 4  | 0 | 0  | 4   | 365256   | 9.99E-01 | 1 |
| KDM6B     | 2148615 | 337 | 24  | 4104680  | 1373092 | 0 | 5  | 2  | 0 | 6  | 7   | 2623008  | 9.99E-01 | 1 |
| ITPR2     | 359658  | 548 | 22  | 7086180  | 1810260 | 0 | 27 | 9  | 0 | 0  | 9   | 1810260  | 9.99E-01 | 1 |
| OSGEPL1   | 398590  | 452 | 25  | 1062660  | 301176  | 0 | 1  | 0  | 0 | 0  | 0   | 301176   | 9.99E-01 | 1 |
| PRAMEF7   | NaN     | NaN | NaN | 2364196  | 705236  | 0 | 1  | 2  | 0 | 50 | 118 | 40350820 | 9.99E-01 | 1 |
| GNAO1     | 465845  | 448 | -26 | 1234608  | 308652  | 0 | 1  | 3  | 0 | 5  | 12  | 2050204  | 9.99E-01 | 1 |
| IIST1H2BI | 398813  | 636 | 53  | 312568   | 96476   | 0 | 1  | 4  | 0 | 2  | 8   | 432184   | 9.99E-01 | 1 |
| POLR3B    | 247626  | 539 | 7   | 2972244  | 776436  | 0 | 3  | 2  | 0 | 6  | 10  | 3349960  | 9.99E-01 | 1 |
| CASP2     | 379804  | 372 | 21  | 1182276  | 311856  | 0 | 2  | 3  | 0 | 1  | 4   | 725172   | 9.99E-01 | 1 |
| DECR1     | 272948  | 534 | 25  | 867572   | 249556  | 0 | 2  | 6  | 0 | 3  | 9   | 765400   | 9.99E-01 | 1 |
| ANKRD32   | 54375   | 399 | 20  | 2788548  | 687792  | 0 | 2  | 0  | 0 | 9  | 15  | 5105040  | 9.99E-01 | 1 |
| KIAA0100  | 1651143 | 225 | 31  | 5709528  | 1619088 | 0 | 21 | 8  | 0 | 3  | 13  | 2353516  | 9.99E-01 | 1 |
| RYR1      | 1481209 | 353 | 17  | 12899660 | 3693856 | 0 | 36 | 16 | 0 | 25 | 56  | 15039220 | 9.99E-01 | 1 |
| ELFN1     | NaN     | NaN | NaN | 1990396  | 665720  | 0 | 1  | 0  | 0 | 7  | 14  | 4353880  | 9.99E-01 | 1 |
| NLRC5     | 804832  | 154 | 53  | 4768620  | 1414032 | 0 | 12 | 7  | 0 | 18 | 35  | 7943428  | 9.99E-01 | 1 |
| SLC5A11   | 280701  | 277 | 18  | 1720904  | 511216  | 0 | 2  | 3  | 0 | 3  | 6   | 1631548  | 9.99E-01 | 1 |
| CCDC121   | 1192074 | 306 | 43  | 1111432  | 305804  | 0 | 2  | 2  | 0 | 3  | 9   | 1304028  | 9.99E-01 | 1 |
| NUP98     | 449630  | 310 | 25  | 4648292  | 1333576 | 0 | 9  | 5  | 0 | 14 | 22  | 4970828  | 9.99E-01 | 1 |
| DMBT1     | 335358  | 404 | 2   | 6194044  | 1762556 | 0 | 13 | 7  | 0 | 1  | 7   | 2112860  | 9.99E-01 | 1 |
| SLC43A3   | 923815  | 191 | -3  | 1249916  | 373444  | 0 | 1  | 5  | 0 | 3  | 7   | 961556   | 9.99E-01 | 1 |
| KCNH6     | 934619  | 247 | -1  | 2497340  | 752584  | 0 | 10 | 7  | 0 | 3  | 11  | 1475620  | 9.99E-01 | 1 |
| UBR3      | 340876  | 631 | 32  | 4945196  | 1269496 | 0 | 4  | 1  | 0 | 2  | 4   | 2137068  | 9.99E-01 | 1 |
| CA4       | 973133  | 347 | 10  | 809188   | 225704  | 0 | 2  | 3  | 0 | 3  | 11  | 1162340  | 9.99E-01 | 1 |
| DNAH12    | 455990  | 454 | 29  | 8133532  | 2070140 | 0 | 5  | 2  | 0 | 7  | 6   | 4083676  | 9.99E-01 | 1 |
| ADAMTS1   | 33367   | 441 | -72 | 2441804  | 693844  | 0 | 2  | 1  | 0 | 7  | 9   | 2880040  | 9.99E-01 | 1 |
| CCDC67    | 234882  | 649 | -20 | 1628700  | 365256  | 0 | 1  | 3  | 0 | 8  | 16  | 3798520  | 9.99E-01 | 1 |
| AACS      | 894670  | 306 | 13  | 1765760  | 463156  | 0 | 1  | 4  | 0 | 12 | 17  | 4043448  | 9.99E-01 | 1 |
| PTAFR     | 794194  | 213 | 28  | 854756   | 248488  | 0 | 1  | 4  | 0 | 1  | 8   | 1075120  | 9.99E-01 | 1 |
| SLC2A14   | 149291  | 305 | 14  | 1316844  | 395160  | 0 | 2  | 3  | 0 | 6  | 13  | 2105028  | 9.99E-01 | 1 |
| EEPD1     | 357816  | 522 | 18  | 1425068  | 426844  | 0 | 3  | 5  | 0 | 2  | 7   | 1048776  | 9.99E-01 | 1 |
| ALS2CL    | 298503  | 495 | 41  | 2451060  | 712356  | 0 | 2  | 3  | 0 | 50 | 70  | 18972664 | 9.99E-01 | 1 |
| TERT      | 657890  | 541 | 24  | 2765408  | 930940  | 0 | 2  | 2  | 0 | 12 | 28  | 8581736  | 9.99E-01 | 1 |
| HLA-C     | 3244502 | 401 | 38  | 933076   | 274832  | 0 | 2  | 3  | 0 | 5  | 6   | 755788   | 9.99E-01 | 1 |

|          |         |     |     |         |         |   |    |   |   |    |    |          |          |   |
|----------|---------|-----|-----|---------|---------|---|----|---|---|----|----|----------|----------|---|
| GEMIN4   | 662733  | 483 | 10  | 2612684 | 784624  | 0 | 1  | 2 | 0 | 5  | 8  | 3196168  | 9.99E-01 | 1 |
| NUP153   | 474858  | 267 | 12  | 3710232 | 1108584 | 0 | 10 | 4 | 0 | 0  | 4  | 1108584  | 9.99E-01 | 1 |
| TBC1D3F  | 711283  | NaN | 16  | 2835540 | 797796  | 0 | 1  | 0 | 0 | 18 | 29 | 11185520 | 9.99E-01 | 1 |
| ASPRV1   | 844060  | 221 | 37  | 836600  | 265576  | 0 | 2  | 4 | 0 | 2  | 4  | 524032   | 9.99E-01 | 1 |
| ANKRD10  | 506421  | 402 | 22  | 1065864 | 304380  | 0 | 1  | 2 | 0 | 1  | 2  | 568888   | 9.99E-01 | 1 |
| PLEKHO1  | 1202779 | 309 | 41  | 1030620 | 306516  | 0 | 3  | 2 | 0 | 0  | 2  | 306516   | 9.99E-01 | 1 |
| MYH1     | 76487   | 723 | -50 | 5099700 | 1278396 | 0 | 12 | 7 | 0 | 1  | 12 | 2560352  | 9.99E-01 | 1 |
| OR10H1   | 808269  | 590 | 18  | 779996  | 246352  | 0 | 1  | 3 | 0 | 2  | 5  | 715916   | 9.99E-01 | 1 |
| NR2C1    | 365826  | 544 | 27  | 1645076 | 424708  | 0 | 4  | 2 | 0 | 1  | 4  | 672128   | 9.99E-01 | 1 |
| SETD8    | 1167786 | 177 | 45  | 913140  | 249912  | 0 | 2  | 3 | 0 | 5  | 9  | 1079036  | 9.99E-01 | 1 |
| NEDD4L   | 321507  | 522 | 58  | 2612684 | 674620  | 0 | 2  | 1 | 0 | 6  | 8  | 2703464  | 9.99E-01 | 1 |
| CNNM2    | 711862  | 233 | 38  | 2208624 | 670704  | 0 | 9  | 6 | 0 | 1  | 7  | 935568   | 9.99E-01 | 1 |
| FLAD1    | 1612870 | 224 | 35  | 1569604 | 491636  | 0 | 8  | 4 | 0 | 2  | 5  | 590248   | 9.99E-01 | 1 |
| TBC1D23  | 378718  | 265 | 25  | 1812396 | 454968  | 0 | 3  | 3 | 0 | 1  | 3  | 792456   | 9.99E-01 | 1 |
| CD6      | 802735  | 546 | 56  | 1699544 | 495196  | 0 | 2  | 6 | 0 | 7  | 12 | 2144900  | 9.99E-01 | 1 |
| PGM2     | 136995  | 603 | 38  | 1606272 | 415452  | 0 | 2  | 4 | 0 | 9  | 18 | 2898552  | 9.99E-01 | 1 |
| GLIS3    | 170537  | 983 | -1  | 2315780 | 709864  | 0 | 5  | 4 | 0 | 2  | 6  | 1083664  | 9.99E-01 | 1 |
| CNTN2    | 655446  | 431 | 37  | 2637604 | 791744  | 0 | 8  | 5 | 0 | 5  | 10 | 1894632  | 9.99E-01 | 1 |
| SEMG2    | 842540  | 324 | 25  | 1505880 | 372732  | 0 | 5  | 3 | 0 | 3  | 6  | 850484   | 9.99E-01 | 1 |
| MMRN2    | 396293  | 164 | 36  | 2345328 | 724104  | 0 | 1  | 2 | 0 | 28 | 35 | 11815284 | 9.99E-01 | 1 |
| CELSR2   | 994135  | 287 | 31  | 7213272 | 2298336 | 0 | 13 | 9 | 0 | 7  | 15 | 4734444  | 9.99E-01 | 1 |
| INPP5E   | 1413299 | 233 | 44  | 1592032 | 512996  | 0 | 1  | 3 | 0 | 2  | 4  | 1077256  | 9.99E-01 | 1 |
| ZNHIT3   | 416822  | 556 | 23  | 419368  | 99680   | 0 | 3  | 1 | 0 | 0  | 1  | 99680    | 9.99E-01 | 1 |
| AICDA    | 291883  | 422 | 15  | 515488  | 141332  | 0 | 1  | 3 | 0 | 1  | 4  | 375580   | 9.99E-01 | 1 |
| TMC8     | 527017  | 217 | 27  | 1799580 | 593808  | 0 | 4  | 3 | 0 | 9  | 36 | 5477416  | 9.99E-01 | 1 |
| PLXNA3   | 2220716 | NaN | 41  | 4706676 | 1427916 | 0 | 6  | 6 | 0 | 50 | 64 | 18875120 | 9.99E-01 | 1 |
| CYP7A1   | 200469  | 608 | 11  | 1300112 | 341404  | 0 | 7  | 6 | 0 | 1  | 6  | 552868   | 9.99E-01 | 1 |
| FRMPD1   | 498002  | 434 | 27  | 3958364 | 1164832 | 0 | 12 | 7 | 0 | 7  | 13 | 2870072  | 9.99E-01 | 1 |
| AKAP8L   | 509601  | 481 | 30  | 1693848 | 438948  | 0 | 5  | 4 | 0 | 6  | 23 | 3086520  | 9.99E-01 | 1 |
| CDK5RAP2 | 386697  | 450 | 10  | 4952316 | 1274124 | 0 | 8  | 2 | 0 | 7  | 11 | 3463168  | 9.99E-01 | 1 |
| CDK42BPC | 2740031 | 204 | 61  | 3894284 | 1232116 | 0 | 5  | 4 | 0 | 30 | 61 | 17975864 | 9.99E-01 | 1 |
| CAND2    | 508965  | 269 | 39  | 3033476 | 991816  | 0 | 1  | 4 | 0 | 31 | 29 | 10881496 | 9.99E-01 | 1 |
| CNGA3    | 228601  | 630 | 29  | 1755080 | 501604  | 0 | 6  | 5 | 0 | 8  | 16 | 1709512  | 9.99E-01 | 1 |



|          |         |      |     |         |         |   |    |   |   |    |    |          |          |   |
|----------|---------|------|-----|---------|---------|---|----|---|---|----|----|----------|----------|---|
| RGPD8    | NaN     | NaN  | NaN | 4541492 | 1212892 | 0 | 4  | 1 | 0 | 7  | 15 | 4901052  | 9.99E-01 | 1 |
| FOXD4L4  | 0       | 1096 | -26 | 2000720 | 671416  | 0 | 3  | 2 | 0 | 11 | 31 | 6042744  | 9.99E-01 | 1 |
| ABL1     | 505506  | 211  | 29  | 2931660 | 884304  | 0 | 6  | 6 | 0 | 17 | 36 | 7115016  | 9.99E-01 | 1 |
| SLC14A2  | 374175  | 438  | -8  | 2344972 | 687080  | 0 | 4  | 6 | 0 | 2  | 10 | 1454972  | 9.99E-01 | 1 |
| SETD1A   | 1508459 | 247  | 46  | 4204716 | 1344612 | 0 | 6  | 7 | 0 | 49 | 70 | 18790748 | 9.99E-01 | 1 |
| PLA2G4A  | 265620  | 592  | -18 | 1987904 | 487720  | 0 | 1  | 3 | 0 | 20 | 30 | 8034564  | 9.99E-01 | 1 |
| STOX2    | 169045  | 458  | -14 | 2316492 | 666432  | 0 | 1  | 1 | 0 | 31 | 38 | 11875804 | 9.99E-01 | 1 |
| MED14    | 479033  | NaN  | 63  | 3718420 | 1071560 | 0 | 3  | 1 | 0 | 3  | 3  | 1719124  | 9.99E-01 | 1 |
| C4B      | NaN     | NaN  | NaN | 8346776 | 2480608 | 0 | 3  | 2 | 0 | 0  | 2  | 2480608  | 9.99E-01 | 1 |
| MC5R     | 131146  | 815  | 8   | 805984  | 238520  | 0 | 3  | 4 | 0 | 1  | 4  | 453188   | 9.99E-01 | 1 |
| CYP21A2  | NaN     | NaN  | NaN | 2481320 | 770740  | 0 | 2  | 0 | 0 | 7  | 14 | 4458900  | 9.99E-01 | 1 |
| PCDHB7   | 915569  | 724  | -11 | 1907804 | 636172  | 0 | 10 | 5 | 0 | 1  | 11 | 1267004  | 9.99E-01 | 1 |
| ATP7A    | 549429  | NaN  | 19  | 3801368 | 1101820 | 0 | 7  | 6 | 0 | 3  | 8  | 1625140  | 9.99E-01 | 1 |
| PPP1R9A  | 419387  | 534  | -15 | 3580292 | 932008  | 0 | 6  | 3 | 0 | 0  | 3  | 932008   | 9.99E-01 | 1 |
| LBP      | 563754  | 350  | 47  | 1248492 | 357780  | 0 | 2  | 2 | 0 | 6  | 10 | 1454260  | 9.99E-01 | 1 |
| ABCA1    | 195112  | 637  | -18 | 5854064 | 1602712 | 0 | 12 | 4 | 0 | 2  | 5  | 1857964  | 9.99E-01 | 1 |
| RGS22    | 290819  | 449  | 22  | 3359216 | 809188  | 0 | 13 | 8 | 0 | 3  | 11 | 1732296  | 1.00E+00 | 1 |
| NOTCH1   | 1489379 | 212  | 43  | 6494152 | 1836248 | 0 | 13 | 5 | 0 | 0  | 5  | 1836248  | 1.00E+00 | 1 |
| VSIG1    | 193027  | NaN  | 32  | 1082952 | 305448  | 0 | 2  | 3 | 0 | 2  | 6  | 1006056  | 1.00E+00 | 1 |
| SH2D7    | 434458  | 271  | 63  | 1131368 | 338200  | 0 | 2  | 3 | 0 | 2  | 5  | 814884   | 1.00E+00 | 1 |
| EPHA1    | 375488  | 379  | 15  | 2459248 | 745820  | 0 | 1  | 5 | 0 | 21 | 25 | 7747628  | 1.00E+00 | 1 |
| CYP24A1  | 158398  | 386  | -31 | 1337136 | 359916  | 0 | 4  | 5 | 0 | 1  | 5  | 587044   | 1.00E+00 | 1 |
| SMC3     | 438920  | 177  | 46  | 3257756 | 764332  | 0 | 5  | 1 | 0 | 1  | 2  | 973304   | 1.00E+00 | 1 |
| RENBP    | 2355024 | NaN  | 25  | 1110364 | 305804  | 0 | 4  | 2 | 0 | 0  | 2  | 305804   | 1.00E+00 | 1 |
| CSPP1    | 353616  | 640  | 25  | 3327532 | 830192  | 0 | 10 | 3 | 0 | 0  | 3  | 830192   | 1.00E+00 | 1 |
| RBM33    | 213580  | 646  | 10  | 2966192 | 858316  | 0 | 1  | 0 | 0 | 3  | 2  | 1454260  | 1.00E+00 | 1 |
| CAMK1    | 954590  | 264  | 39  | 1085088 | 257388  | 0 | 2  | 3 | 0 | 1  | 4  | 651480   | 1.00E+00 | 1 |
| PPP2R2B  | 309460  | 509  | 1   | 1292992 | 313280  | 0 | 2  | 3 | 0 | 1  | 3  | 651480   | 1.00E+00 | 1 |
| SERPINB8 | 114875  | 671  | 26  | 992528  | 246352  | 0 | 4  | 2 | 0 | 1  | 2  | 340336   | 1.00E+00 | 1 |
| TLR8     | 208025  | NaN  | 64  | 2626568 | 718408  | 0 | 6  | 4 | 0 | 7  | 21 | 3953380  | 1.00E+00 | 1 |
| SLC4A3   | 547550  | 487  | 29  | 3129952 | 1005344 | 0 | 4  | 2 | 0 | 7  | 12 | 3506956  | 1.00E+00 | 1 |
| AGRN     | 1971475 | 239  | 15  | 5064456 | 1642584 | 0 | 9  | 5 | 0 | 1  | 5  | 1863660  | 1.00E+00 | 1 |
| GNG3     | 2425755 | 248  | 51  | 198648  | 52332   | 0 | 3  | 1 | 0 | 0  | 1  | 52332    | 1.00E+00 | 1 |

|          |         |     |     |         |         |   |    |   |   |    |    |          |          |   |
|----------|---------|-----|-----|---------|---------|---|----|---|---|----|----|----------|----------|---|
| JUP      | 1760409 | 175 | 35  | 1882172 | 567820  | 0 | 4  | 7 | 0 | 6  | 22 | 3387340  | 1.00E+00 | 1 |
| NCAPD3   | 270385  | 601 | 14  | 3901404 | 1046640 | 0 | 6  | 2 | 0 | 0  | 2  | 1046640  | 1.00E+00 | 1 |
| ZC3H10   | 2878044 | 171 | 40  | 1055540 | 342472  | 0 | 1  | 5 | 0 | 4  | 10 | 1466364  | 1.00E+00 | 1 |
| RFX1     | 971756  | 231 | 32  | 2459960 | 765400  | 0 | 1  | 4 | 0 | 50 | 60 | 18946676 | 1.00E+00 | 1 |
| PLAU     | 988012  | 191 | 43  | 1414032 | 359916  | 0 | 1  | 0 | 0 | 0  | 0  | 359916   | 1.00E+00 | 1 |
| COLGA6L1 | NaN     | NaN | NaN | 2467436 | 670348  | 0 | 1  | 0 | 0 | 7  | 14 | 4358508  | 1.00E+00 | 1 |
| EFTUD1   | 373597  | 701 | 13  | 2908520 | 764332  | 0 | 2  | 2 | 0 | 8  | 10 | 3317920  | 1.00E+00 | 1 |
| BCR      | 384444  | 575 | 43  | 3250992 | 918480  | 0 | 1  | 2 | 0 | 50 | 43 | 17722036 | 1.00E+00 | 1 |
| ATP4A    | 1081638 | 390 | 41  | 2638672 | 772520  | 0 | 3  | 7 | 0 | 26 | 46 | 9651160  | 1.00E+00 | 1 |
| ATP11C   | 66616   | NaN | 18  | 3032052 | 793524  | 0 | 3  | 3 | 0 | 3  | 5  | 1403352  | 1.00E+00 | 1 |
| ZBTB46   | 1125169 | 202 | 40  | 1469212 | 438236  | 0 | 2  | 4 | 0 | 5  | 7  | 1182988  | 1.00E+00 | 1 |
| ASAP3    | 1050777 | 159 | 29  | 2360636 | 662872  | 0 | 4  | 6 | 0 | 14 | 28 | 5192260  | 1.00E+00 | 1 |
| TTBK2    | 611976  | 453 | 31  | 3146328 | 902460  | 0 | 10 | 4 | 0 | 0  | 4  | 902460   | 1.00E+00 | 1 |
| MTMR12   | 384742  | 160 | 27  | 1969036 | 491636  | 0 | 7  | 3 | 0 | 0  | 3  | 491636   | 1.00E+00 | 1 |
| HRH2     | 238233  | 642 | 19  | 970812  | 310788  | 0 | 1  | 3 | 0 | 1  | 3  | 612676   | 1.00E+00 | 1 |
| ARHGEF10 | 100967  | 551 | -24 | 3481680 | 947316  | 0 | 5  | 4 | 0 | 26 | 53 | 13220060 | 1.00E+00 | 1 |
| ASPH     | 423823  | 377 | 14  | 2677120 | 634748  | 0 | 2  | 2 | 0 | 3  | 5  | 2028488  | 1.00E+00 | 1 |
| MKRN1    | 359405  | 521 | 24  | 1249204 | 330368  | 0 | 1  | 2 | 0 | 3  | 4  | 863656   | 1.00E+00 | 1 |
| MUC1     | 1801444 | 194 | 32  | 798508  | 140264  | 0 | 1  | 2 | 0 | 3  | 6  | 512640   | 1.00E+00 | 1 |
| SLITRK2  | 1640    | NaN | -34 | 2101468 | 617660  | 0 | 3  | 6 | 0 | 12 | 28 | 4996816  | 1.00E+00 | 1 |
| CYP2F1   | 1016551 | 354 | 11  | 1245644 | 369172  | 0 | 5  | 6 | 0 | 7  | 20 | 1926672  | 1.00E+00 | 1 |
| NIPAL3   | 604127  | 325 | 29  | 1054472 | 292276  | 0 | 3  | 2 | 0 | 0  | 2  | 292276   | 1.00E+00 | 1 |
| PHF12    | 1834230 | 220 | 37  | 2563912 | 741548  | 0 | 3  | 6 | 0 | 4  | 10 | 1975444  | 1.00E+00 | 1 |
| SLC8A3   | 527365  | 409 | 28  | 2430412 | 691352  | 0 | 5  | 7 | 0 | 2  | 13 | 2457468  | 1.00E+00 | 1 |
| NTN4     | 461515  | 237 | 7   | 1629412 | 424352  | 0 | 3  | 2 | 0 | 4  | 9  | 1529376  | 1.00E+00 | 1 |
| THBS3    | 1801444 | 194 | 32  | 2483456 | 678892  | 0 | 2  | 2 | 0 | 50 | 85 | 19936000 | 1.00E+00 | 1 |
| RFT1     | 907827  | 192 | 39  | 1369176 | 420792  | 0 | 1  | 5 | 0 | 3  | 11 | 2165192  | 1.00E+00 | 1 |
| DUSP28   | 645026  | 485 | 28  | 425776  | 149876  | 0 | 1  | 1 | 0 | 0  | 1  | 149876   | 1.00E+00 | 1 |
| WNT10B   | 1737773 | 214 | 55  | 962980  | 303668  | 0 | 4  | 3 | 0 | 1  | 5  | 431472   | 1.00E+00 | 1 |
| PPARG    | 372685  | 222 | 25  | 1307944 | 341048  | 0 | 12 | 5 | 0 | 0  | 5  | 341048   | 1.00E+00 | 1 |
| KCNJ12   | 405028  | 480 | -60 | 1075476 | 319332  | 0 | 2  | 1 | 0 | 0  | 1  | 319332   | 1.00E+00 | 1 |
| MAP1LC3A | 990458  | 214 | 54  | 376648  | 89000   | 0 | 3  | 2 | 0 | 1  | 3  | 154860   | 1.00E+00 | 1 |
| TTLL8    | 895187  | 271 | 36  | 2116776 | 613032  | 0 | 1  | 1 | 0 | 14 | 24 | 5955524  | 1.00E+00 | 1 |

|         |         |      |     |          |         |   |    |    |   |    |    |          |          |   |
|---------|---------|------|-----|----------|---------|---|----|----|---|----|----|----------|----------|---|
| PCDHB2  | 987049  | 724  | -11 | 1932724  | 627272  | 0 | 4  | 6  | 0 | 3  | 22 | 2510868  | 1.00E+00 | 1 |
| TCEB3C  | NaN     | NaN  | NaN | 2640808  | 862232  | 0 | 1  | 1  | 0 | 9  | 17 | 5219672  | 1.00E+00 | 1 |
| ABCA10  | 137274  | 415  | -43 | 4076200  | 1024568 | 0 | 7  | 4  | 0 | 10 | 17 | 3527604  | 1.00E+00 | 1 |
| PDE1B   | 643658  | 392  | 33  | 1462092  | 385548  | 0 | 3  | 3  | 0 | 1  | 3  | 510504   | 1.00E+00 | 1 |
| OR8I2   | 9992    | 1007 | -32 | 765400   | 229976  | 0 | 7  | 4  | 0 | 2  | 14 | 692064   | 1.00E+00 | 1 |
| CCDC8   | 1099113 | 393  | 25  | 1313996  | 412960  | 0 | 2  | 3  | 0 | 2  | 8  | 1231404  | 1.00E+00 | 1 |
| TMEM187 | 2355024 | NaN  | 25  | 629052   | 210396  | 0 | 3  | 2  | 0 | 0  | 2  | 210396   | 1.00E+00 | 1 |
| OXCT1   | 109769  | 687  | 11  | 1365616  | 372020  | 0 | 1  | 3  | 0 | 5  | 12 | 2120692  | 1.00E+00 | 1 |
| TRIM11  | 682437  | 316  | 7   | 1154152  | 369884  | 0 | 3  | 4  | 0 | 1  | 7  | 830192   | 1.00E+00 | 1 |
| NBPF10  | NaN     | NaN  | NaN | 9399468  | 2342124 | 0 | 4  | 1  | 0 | 0  | 1  | 2342124  | 1.00E+00 | 1 |
| APOA1   | 421374  | 323  | 39  | 683164   | 190460  | 0 | 2  | 1  | 0 | 1  | 2  | 262372   | 1.00E+00 | 1 |
| GPX5    | 247624  | 576  | 27  | 594876   | 135636  | 0 | 2  | 1  | 0 | 0  | 1  | 135636   | 1.00E+00 | 1 |
| KAT2B   | 102581  | 583  | 4   | 2153444  | 588112  | 0 | 4  | 7  | 0 | 7  | 15 | 2051272  | 1.00E+00 | 1 |
| STH     | 365925  | 469  | 18  | 321468   | 96120   | 0 | 2  | 2  | 0 | 0  | 2  | 96120    | 1.00E+00 | 1 |
| ANKRD36 | NaN     | NaN  | NaN | 5282328  | 1260240 | 0 | 8  | 1  | 0 | 7  | 15 | 4948400  | 1.00E+00 | 1 |
| DNAH17  | 999172  | 188  | 25  | 11480288 | 3160924 | 0 | 33 | 17 | 0 | 50 | 82 | 21484956 | 1.00E+00 | 1 |
| TRIM59  | 435184  | 513  | 16  | 1035604  | 263084  | 0 | 4  | 2  | 0 | 0  | 2  | 263084   | 1.00E+00 | 1 |
| ID1     | 741997  | 309  | -33 | 395516   | 134212  | 0 | 3  | 3  | 0 | 0  | 3  | 134212   | 1.00E+00 | 1 |
| CA5A    | 612550  | 133  | 27  | 791744   | 216448  | 0 | 3  | 2  | 0 | 0  | 2  | 216448   | 1.00E+00 | 1 |
| OLFM3   | 66875   | 991  | -15 | 1183344  | 308652  | 0 | 9  | 3  | 0 | 0  | 3  | 308652   | 1.00E+00 | 1 |
| C2orf70 | 931476  | 428  | 35  | 515132   | 147028  | 0 | 2  | 1  | 0 | 0  | 1  | 147028   | 1.00E+00 | 1 |
| TRIM38  | 392745  | 685  | 34  | 1199008  | 315416  | 0 | 3  | 4  | 0 | 2  | 10 | 1178004  | 1.00E+00 | 1 |
| AMBRA1  | 880494  | 212  | 45  | 3020304  | 925956  | 0 | 9  | 5  | 0 | 0  | 5  | 925956   | 1.00E+00 | 1 |
| OR2T2   | 112460  | 903  | -20 | 791388   | 249912  | 0 | 1  | 6  | 0 | 3  | 10 | 959776   | 1.00E+00 | 1 |
| NTSR2   | 219483  | 336  | 21  | 990036   | 341760  | 0 | 1  | 5  | 0 | 2  | 6  | 866148   | 1.00E+00 | 1 |
| ADAMTS1 | 143599  | 755  | -36 | 2796024  | 807408  | 0 | 2  | 4  | 0 | 14 | 36 | 8696012  | 1.00E+00 | 1 |
| GRIN2B  | 153586  | 825  | -10 | 3770752  | 1038452 | 0 | 9  | 2  | 0 | 1  | 4  | 1286228  | 1.00E+00 | 1 |
| DYNC1H1 | 1456679 | 196  | 38  | 11940952 | 3276980 | 0 | 23 | 10 | 0 | 29 | 60 | 19922828 | 1.00E+00 | 1 |
| CBL     | 1172813 | 183  | 53  | 2305456  | 664652  | 0 | 5  | 3  | 0 | 0  | 3  | 664652   | 1.00E+00 | 1 |
| CYFIP1  | 352283  | 539  | -19 | 3589548  | 961200  | 0 | 7  | 7  | 0 | 5  | 9  | 2170532  | 1.00E+00 | 1 |
| GALNT8  | 283327  | 862  | 24  | 1639380  | 449628  | 0 | 6  | 6  | 0 | 2  | 9  | 1034180  | 1.00E+00 | 1 |
| CES3    | 993495  | 135  | 41  | 1468144  | 417944  | 0 | 6  | 4  | 0 | 0  | 4  | 417944   | 1.00E+00 | 1 |
| MID1    | 117200  | NaN  | 14  | 1709512  | 469208  | 0 | 6  | 4  | 0 | 0  | 4  | 469208   | 1.00E+00 | 1 |

|         |         |      |     |          |         |   |    |    |   |    |    |          |          |   |
|---------|---------|------|-----|----------|---------|---|----|----|---|----|----|----------|----------|---|
| NR5A2   | 120174  | 616  | -8  | 1395164  | 371308  | 0 | 5  | 2  | 0 | 0  | 2  | 371308   | 1.00E+00 | 1 |
| DUOX1   | 667418  | 544  | 27  | 3962992  | 1150592 | 0 | 2  | 4  | 0 | 50 | 85 | 27585372 | 1.00E+00 | 1 |
| LRP1    | 2190357 | 238  | 60  | 11820980 | 3117136 | 0 | 31 | 11 | 0 | 41 | 73 | 20645864 | 1.00E+00 | 1 |
| UNC80   | NaN     | NaN  | NaN | 8369560  | 2343548 | 0 | 2  | 1  | 0 | 0  | 1  | 2343548  | 1.00E+00 | 1 |
| EPB41   | 619053  | 227  | 30  | 2282316  | 597012  | 0 | 3  | 1  | 0 | 6  | 16 | 3362064  | 1.00E+00 | 1 |
| PRPF8   | 1361271 | 198  | 27  | 6038828  | 1625140 | 0 | 7  | 6  | 0 | 50 | 60 | 20575376 | 1.00E+00 | 1 |
| NYNRIN  | 897133  | 265  | 40  | 4642240  | 1476332 | 0 | 13 | 9  | 0 | 1  | 9  | 1655044  | 1.00E+00 | 1 |
| FAF1    | 237738  | 691  | -5  | 1719480  | 443220  | 0 | 3  | 4  | 0 | 1  | 4  | 782844   | 1.00E+00 | 1 |
| PCDHA4  | 861651  | 606  | 2   | 2306880  | 754008  | 0 | 7  | 8  | 0 | 5  | 30 | 3429704  | 1.00E+00 | 1 |
| SLC6A5  | 148079  | 842  | 1   | 2033116  | 587756  | 0 | 4  | 3  | 0 | 2  | 9  | 1656824  | 1.00E+00 | 1 |
| PARVG   | 201266  | 327  | 30  | 877184   | 237808  | 0 | 1  | 3  | 0 | 1  | 3  | 495908   | 1.00E+00 | 1 |
| DSCAM   | 25449   | 971  | -72 | 5118568  | 1467788 | 0 | 20 | 9  | 0 | 21 | 48 | 7019964  | 1.00E+00 | 1 |
| TMED4   | 1462615 | 191  | 56  | 584908   | 164828  | 0 | 2  | 2  | 0 | 0  | 2  | 164828   | 1.00E+00 | 1 |
| TMEM97  | 1405196 | 214  | 10  | 448916   | 126736  | 0 | 1  | 3  | 0 | 1  | 3  | 232468   | 1.00E+00 | 1 |
| ADRA1A  | 259233  | 692  | 3   | 1384840  | 420080  | 0 | 5  | 5  | 0 | 1  | 6  | 654328   | 1.00E+00 | 1 |
| SYNRG   | 559565  | 201  | 27  | 3443588  | 939484  | 0 | 8  | 5  | 0 | 13 | 32 | 5999668  | 1.00E+00 | 1 |
| HDAC7   | 391157  | 182  | 29  | 2493780  | 791388  | 0 | 2  | 3  | 0 | 1  | 3  | 1079748  | 1.00E+00 | 1 |
| RPRM    | 22780   | 737  | -11 | 266288   | 86152   | 0 | 3  | 2  | 0 | 0  | 2  | 86152    | 1.00E+00 | 1 |
| SPAST   | 378148  | 197  | 28  | 1589540  | 455680  | 0 | 5  | 3  | 0 | 0  | 3  | 455680   | 1.00E+00 | 1 |
| SCN4A   | 1455216 | 404  | 25  | 4704896  | 1281244 | 0 | 9  | 9  | 0 | 21 | 37 | 8446812  | 1.00E+00 | 1 |
| PLD4    | 855494  | 247  | 41  | 1271276  | 393736  | 0 | 1  | 2  | 0 | 0  | 2  | 393736   | 1.00E+00 | 1 |
| DGKZ    | 811789  | 212  | 44  | 3222512  | 967252  | 0 | 3  | 6  | 0 | 12 | 18 | 4998240  | 1.00E+00 | 1 |
| FAM98C  | 1467279 | 253  | 0   | 859384   | 294056  | 0 | 2  | 3  | 0 | 0  | 3  | 294056   | 1.00E+00 | 1 |
| MATN2   | 616574  | 272  | 28  | 2508376  | 634748  | 0 | 8  | 4  | 0 | 0  | 4  | 634748   | 1.00E+00 | 1 |
| KCNV1   | 102383  | 890  | -18 | 1238524  | 375224  | 0 | 6  | 4  | 0 | 0  | 4  | 375224   | 1.00E+00 | 1 |
| ZFYVE19 | 1023960 | 172  | 48  | 1204348  | 350660  | 0 | 4  | 3  | 0 | 0  | 3  | 350660   | 1.00E+00 | 1 |
| OR8H2   | 9992    | 1007 | -32 | 769672   | 231044  | 0 | 6  | 4  | 0 | 2  | 14 | 692064   | 1.00E+00 | 1 |
| COL5A1  | 229207  | 421  | 31  | 4691012  | 1478824 | 0 | 15 | 10 | 0 | 2  | 14 | 2226068  | 1.00E+00 | 1 |
| AIFM1   | 379257  | NaN  | 58  | 1698476  | 487720  | 0 | 1  | 2  | 0 | 21 | 24 | 4310448  | 1.00E+00 | 1 |
| SALL3   | 47663   | 635  | -65 | 3144548  | 1032400 | 0 | 3  | 9  | 0 | 16 | 39 | 7197252  | 1.00E+00 | 1 |
| GPR4    | 1029266 | 194  | 44  | 882168   | 280884  | 0 | 3  | 4  | 0 | 1  | 5  | 462800   | 1.00E+00 | 1 |
| ANGEL1  | 308800  | 471  | 39  | 1694560  | 493772  | 0 | 1  | 5  | 0 | 5  | 12 | 2383776  | 1.00E+00 | 1 |
| CLUL1   | 449991  | 486  | 23  | 1244220  | 290496  | 0 | 3  | 1  | 0 | 0  | 1  | 290496   | 1.00E+00 | 1 |

|          |         |     |     |         |         |   |    |    |   |    |    |          |          |   |
|----------|---------|-----|-----|---------|---------|---|----|----|---|----|----|----------|----------|---|
| PCDHB10  | 915569  | 724 | -11 | 1935572 | 630832  | 0 | 10 | 6  | 0 | 0  | 6  | 630832   | 1.00E+00 | 1 |
| ATP2B3   | 940418  | NaN | 24  | 3218596 | 943400  | 0 | 3  | 6  | 0 | 44 | 62 | 14837724 | 1.00E+00 | 1 |
| DCP1B    | 232517  | 618 | 29  | 1561416 | 454968  | 0 | 4  | 1  | 0 | 4  | 6  | 866148   | 1.00E+00 | 1 |
| PCDHB1   | 987049  | 724 | -11 | 2006416 | 619796  | 0 | 6  | 5  | 0 | 3  | 22 | 2510868  | 1.00E+00 | 1 |
| MAST4    | 36320   | 621 | 7   | 6652216 | 2013536 | 0 | 8  | 10 | 0 | 22 | 39 | 12527284 | 1.00E+00 | 1 |
| ANKRD13F | 719319  | 383 | 30  | 1594524 | 474192  | 0 | 1  | 1  | 0 | 7  | 11 | 2172668  | 1.00E+00 | 1 |
| MEM106C  | 374433  | 246 | 47  | 651124  | 182984  | 0 | 4  | 2  | 0 | 0  | 2  | 182984   | 1.00E+00 | 1 |
| SPTB     | 584151  | 204 | 38  | 6028148 | 1652908 | 0 | 8  | 7  | 0 | 24 | 30 | 9230012  | 1.00E+00 | 1 |
| NPR2     | 885056  | 190 | 51  | 2718772 | 802424  | 0 | 6  | 6  | 0 | 2  | 9  | 1739772  | 1.00E+00 | 1 |
| ALG9     | 437477  | 182 | 28  | 1607696 | 440728  | 0 | 1  | 0  | 0 | 1  | 2  | 639020   | 1.00E+00 | 1 |
| NCK1     | 181954  | 195 | 20  | 974728  | 249200  | 0 | 2  | 3  | 0 | 1  | 4  | 493772   | 1.00E+00 | 1 |
| KCNK3    | 1198614 | 300 | 41  | 957996  | 311856  | 0 | 2  | 3  | 0 | 0  | 3  | 311856   | 1.00E+00 | 1 |
| SLC39A12 | 94785   | 360 | -9  | 1779288 | 489144  | 0 | 12 | 7  | 0 | 1  | 8  | 713780   | 1.00E+00 | 1 |
| WDSUB1   | 386986  | 265 | 29  | 1242084 | 328944  | 0 | 1  | 2  | 0 | 2  | 6  | 935568   | 1.00E+00 | 1 |
| GRAMD1A  | 821282  | 419 | -46 | 1860100 | 543968  | 0 | 2  | 3  | 0 | 10 | 23 | 3877196  | 1.00E+00 | 1 |
| RPL26L1  | 488219  | 181 | 36  | 379852  | 100748  | 0 | 2  | 2  | 0 | 0  | 2  | 100748   | 1.00E+00 | 1 |
| KIF13B   | 333305  | 417 | 42  | 4706320 | 1316132 | 0 | 6  | 2  | 0 | 3  | 8  | 2781428  | 1.00E+00 | 1 |
| FANCA    | 1234390 | 219 | 41  | 3773956 | 1079036 | 0 | 14 | 9  | 0 | 1  | 9  | 1265580  | 1.00E+00 | 1 |
| DNAJB5   | 676166  | 394 | 23  | 1051980 | 309720  | 0 | 2  | 3  | 0 | 1  | 5  | 605556   | 1.00E+00 | 1 |
| LAMB1    | 481432  | 406 | 11  | 4674992 | 1191532 | 0 | 10 | 4  | 0 | 0  | 4  | 1191532  | 1.00E+00 | 1 |
| RWDD2B   | 316591  | 303 | 34  | 831616  | 212888  | 0 | 2  | 1  | 0 | 0  | 1  | 212888   | 1.00E+00 | 1 |
| PFKP     | 221025  | 438 | 11  | 2029912 | 577076  | 0 | 4  | 4  | 0 | 0  | 4  | 577076   | 1.00E+00 | 1 |
| UBA1     | 819569  | NaN | 38  | 2716992 | 780708  | 0 | 1  | 1  | 0 | 4  | 9  | 2805636  | 1.00E+00 | 1 |
| NOMO2    | 707984  | 675 | 17  | 3268436 | 933076  | 0 | 1  | 2  | 0 | 3  | 5  | 2171956  | 1.00E+00 | 1 |
| ZNF878   | 975609  | 728 | -8  | 1492708 | 379496  | 0 | 2  | 3  | 0 | 5  | 25 | 3319344  | 1.00E+00 | 1 |
| USP15    | 239150  | 456 | -26 | 2532940 | 608048  | 0 | 10 | 4  | 0 | 0  | 4  | 608048   | 1.00E+00 | 1 |
| MYH3     | 60385   | 749 | -41 | 5083680 | 1301892 | 0 | 15 | 6  | 0 | 4  | 11 | 2394100  | 1.00E+00 | 1 |
| PELO     | 158780  | 388 | 0   | 962980  | 278036  | 0 | 1  | 2  | 0 | 0  | 2  | 278036   | 1.00E+00 | 1 |
| PTK6     | 1262904 | 298 | 54  | 1149524 | 330724  | 0 | 2  | 4  | 0 | 3  | 10 | 1009972  | 1.00E+00 | 1 |
| CCDC129  | 34323   | 943 | -1  | 2676408 | 727308  | 0 | 6  | 3  | 0 | 1  | 6  | 899968   | 1.00E+00 | 1 |
| SLC44A5  | 178229  | 935 | -21 | 2010688 | 510860  | 0 | 2  | 1  | 0 | 0  | 1  | 510860   | 1.00E+00 | 1 |
| DCAF4    | 354097  | 341 | 41  | 1327524 | 320400  | 0 | 3  | 2  | 0 | 0  | 2  | 320400   | 1.00E+00 | 1 |
| KIF23    | 307077  | 298 | 19  | 2528668 | 644360  | 0 | 8  | 3  | 0 | 0  | 3  | 644360   | 1.00E+00 | 1 |

|          |         |     |     |         |         |   |    |    |   |    |    |          |          |   |
|----------|---------|-----|-----|---------|---------|---|----|----|---|----|----|----------|----------|---|
| LMBR1L   | 1955973 | 214 | 60  | 1251696 | 386616  | 0 | 1  | 4  | 0 | 1  | 5  | 834820   | 1.00E+00 | 1 |
| KIAA2026 | 349735  | 317 | 26  | 5199736 | 1571384 | 0 | 15 | 7  | 0 | 0  | 7  | 1571384  | 1.00E+00 | 1 |
| FGF8     | 817474  | 335 | 37  | 622644  | 183696  | 0 | 3  | 2  | 0 | 0  | 2  | 183696   | 1.00E+00 | 1 |
| FADS1    | 1239228 | 212 | 59  | 1297264 | 358136  | 0 | 2  | 3  | 0 | 1  | 3  | 416876   | 1.00E+00 | 1 |
| PI4KA    | 436102  | 288 | 42  | 5341780 | 1441088 | 0 | 11 | 4  | 0 | 0  | 4  | 1441088  | 1.00E+00 | 1 |
| LAMA5    | 1090360 | 252 | 21  | 9305484 | 2876124 | 0 | 14 | 12 | 0 | 0  | 12 | 2876124  | 1.00E+00 | 1 |
| KLB      | 648710  | 177 | 43  | 2623008 | 744396  | 0 | 6  | 6  | 0 | 2  | 7  | 1136352  | 1.00E+00 | 1 |
| KIAA0196 | 489847  | 520 | 25  | 3036324 | 795660  | 0 | 6  | 3  | 0 | 3  | 8  | 1393740  | 1.00E+00 | 1 |
| ERN1     | 1464674 | 379 | 16  | 2516208 | 707016  | 0 | 1  | 0  | 0 | 1  | 16 | 4400872  | 1.00E+00 | 1 |
| DLG5     | 364785  | 259 | 27  | 4875420 | 1410828 | 0 | 11 | 7  | 0 | 2  | 13 | 2497340  | 1.00E+00 | 1 |
| KDM4C    | 153801  | 838 | 14  | 2975804 | 752584  | 0 | 8  | 5  | 0 | 2  | 6  | 1178360  | 1.00E+00 | 1 |
| PCDHB9   | 915569  | 724 | -11 | 1927740 | 625848  | 0 | 5  | 6  | 0 | 1  | 12 | 1256680  | 1.00E+00 | 1 |
| HHIPL2   | 227631  | 467 | -6  | 1833044 | 526168  | 0 | 9  | 4  | 0 | 0  | 4  | 526168   | 1.00E+00 | 1 |
| CYP4F12  | 865205  | 605 | 21  | 1362056 | 372376  | 0 | 7  | 5  | 0 | 0  | 5  | 372376   | 1.00E+00 | 1 |
| NBPF3    | 563178  | 283 | 37  | 1668572 | 418300  | 0 | 5  | 2  | 0 | 0  | 2  | 418300   | 1.00E+00 | 1 |
| SLC18A2  | 202102  | 624 | 0   | 1340696 | 373444  | 0 | 1  | 5  | 0 | 3  | 7  | 1114992  | 1.00E+00 | 1 |
| GPR45    | 184828  | 497 | 0   | 899256  | 295836  | 0 | 4  | 3  | 0 | 0  | 3  | 295836   | 1.00E+00 | 1 |
| PTPRJ    | 601164  | 223 | -10 | 3425432 | 971524  | 0 | 7  | 6  | 0 | 4  | 8  | 1750808  | 1.00E+00 | 1 |
| RNLS     | 193044  | 396 | 33  | 947316  | 256320  | 0 | 4  | 5  | 0 | 1  | 8  | 561768   | 1.00E+00 | 1 |
| FUT10    | 96386   | 500 | 5   | 1221436 | 329300  | 0 | 4  | 2  | 0 | 0  | 2  | 329300   | 1.00E+00 | 1 |
| CALN1    | 17685   | 956 | -29 | 690996  | 174084  | 0 | 1  | 3  | 0 | 2  | 10 | 813104   | 1.00E+00 | 1 |
| TNPO2    | 1959466 | 226 | 29  | 2350668 | 631188  | 0 | 4  | 6  | 0 | 3  | 7  | 1400860  | 1.00E+00 | 1 |
| DTX3     | 1338867 | 303 | 48  | 852264  | 280884  | 0 | 4  | 3  | 0 | 0  | 3  | 280884   | 1.00E+00 | 1 |
| TRIM58   | 87551   | 993 | -35 | 1215384 | 368460  | 0 | 1  | 4  | 0 | 4  | 10 | 1329304  | 1.00E+00 | 1 |
| USP22    | 431615  | 382 | -19 | 1386976 | 349592  | 0 | 1  | 3  | 0 | 2  | 4  | 791032   | 1.00E+00 | 1 |
| SIX1     | 352813  | 482 | 5   | 703812  | 213600  | 0 | 3  | 3  | 0 | 0  | 3  | 213600   | 1.00E+00 | 1 |
| UNK      | 1806586 | 178 | 31  | 2253480 | 656820  | 0 | 1  | 2  | 0 | 50 | 93 | 20102964 | 1.00E+00 | 1 |
| MYBBP1A  | 1252775 | 318 | 22  | 3396596 | 1013176 | 0 | 3  | 8  | 0 | 3  | 9  | 2258820  | 1.00E+00 | 1 |
| ATP2A3   | 617494  | 268 | 33  | 2694564 | 820224  | 0 | 4  | 4  | 0 | 1  | 7  | 1224996  | 1.00E+00 | 1 |
| ADCK1    | 427928  | 517 | 24  | 1344256 | 377360  | 0 | 3  | 3  | 0 | 1  | 4  | 446068   | 1.00E+00 | 1 |
| DUS1L    | 3850694 | 197 | 34  | 1235320 | 338912  | 0 | 4  | 4  | 0 | 0  | 4  | 338912   | 1.00E+00 | 1 |
| ALDH5A1  | 407627  | 461 | 18  | 1376652 | 427200  | 0 | 1  | 4  | 0 | 2  | 7  | 1186548  | 1.00E+00 | 1 |
| FDXACB1  | 437513  | 221 | 22  | 1582064 | 439660  | 0 | 1  | 1  | 0 | 0  | 1  | 439660   | 1.00E+00 | 1 |

|          |         |      |     |         |         |   |   |   |   |    |    |          |          |   |
|----------|---------|------|-----|---------|---------|---|---|---|---|----|----|----------|----------|---|
| CASC3    | 1537878 | 156  | 32  | 1773592 | 537560  | 0 | 1 | 2 | 0 | 5  | 22 | 3656476  | 1.00E+00 | 1 |
| CD209    | 719851  | 329  | 21  | 1044504 | 280884  | 0 | 3 | 4 | 0 | 1  | 6  | 547172   | 1.00E+00 | 1 |
| PASK     | 1394664 | 278  | 35  | 3309376 | 1005344 | 0 | 3 | 6 | 0 | 17 | 39 | 9146352  | 1.00E+00 | 1 |
| ARF3     | 1737773 | 214  | 55  | 472412  | 127804  | 0 | 1 | 2 | 0 | 0  | 2  | 127804   | 1.00E+00 | 1 |
| ZP4      | 14616   | 1051 | -30 | 1384484 | 398008  | 0 | 5 | 5 | 0 | 0  | 5  | 398008   | 1.00E+00 | 1 |
| PAQR5    | 366429  | 210  | 29  | 854756  | 231400  | 0 | 1 | 2 | 0 | 0  | 2  | 231400   | 1.00E+00 | 1 |
| TTC9C    | 2415432 | 248  | 47  | 435388  | 124244  | 0 | 1 | 1 | 0 | 0  | 1  | 124244   | 1.00E+00 | 1 |
| SNF8     | 793101  | 174  | 29  | 678536  | 183340  | 0 | 2 | 3 | 0 | 1  | 3  | 296192   | 1.00E+00 | 1 |
| CDK10    | 1090549 | 219  | 38  | 987900  | 274476  | 0 | 2 | 3 | 0 | 1  | 3  | 373088   | 1.00E+00 | 1 |
| PSG2     | 263820  | 178  | -32 | 852620  | 247420  | 0 | 7 | 5 | 0 | 0  | 5  | 247420   | 1.00E+00 | 1 |
| RNF11    | 503560  | 305  | 7   | 394804  | 110360  | 0 | 1 | 1 | 0 | 0  | 1  | 110360   | 1.00E+00 | 1 |
| PCDHGB5  | 662513  | 568  | 2   | 2311152 | 723036  | 0 | 2 | 2 | 0 | 0  | 2  | 723036   | 1.00E+00 | 1 |
| TCF25    | 1207036 | 221  | 45  | 1754012 | 489856  | 0 | 5 | 6 | 0 | 2  | 11 | 1302960  | 1.00E+00 | 1 |
| DNMBP    | 1100254 | 221  | 32  | 3986132 | 1138132 | 0 | 8 | 4 | 0 | 2  | 11 | 2301896  | 1.00E+00 | 1 |
| BTBD1    | 384974  | 679  | 27  | 1236032 | 341404  | 0 | 1 | 1 | 0 | 0  | 1  | 341404   | 1.00E+00 | 1 |
| RAB9A    | 135235  | NaN  | 48  | 514776  | 136704  | 0 | 1 | 2 | 0 | 0  | 2  | 136704   | 1.00E+00 | 1 |
| NDST2    | 1009357 | 191  | 42  | 2210760 | 672840  | 0 | 2 | 4 | 0 | 2  | 5  | 1132080  | 1.00E+00 | 1 |
| MOCS3    | 386595  | 367  | 36  | 1093632 | 385548  | 0 | 7 | 6 | 0 | 0  | 6  | 385548   | 1.00E+00 | 1 |
| PCDHB13  | 915569  | 724  | -11 | 1934504 | 625492  | 0 | 7 | 6 | 0 | 1  | 12 | 1256324  | 1.00E+00 | 1 |
| ERH      | 911402  | 431  | 39  | 285512  | 65860   | 0 | 2 | 1 | 0 | 0  | 1  | 65860    | 1.00E+00 | 1 |
| DONSON   | 908921  | 375  | 68  | 1427916 | 429336  | 0 | 4 | 3 | 0 | 0  | 3  | 429336   | 1.00E+00 | 1 |
| SLC24A3  | 161681  | 913  | -20 | 1672132 | 462800  | 0 | 6 | 4 | 0 | 0  | 4  | 462800   | 1.00E+00 | 1 |
| ARMC6    | 1327004 | 215  | 24  | 1192244 | 365968  | 0 | 4 | 3 | 0 | 0  | 3  | 365968   | 1.00E+00 | 1 |
| JRHGEF10 | 375252  | 279  | 30  | 3263808 | 956928  | 0 | 3 | 2 | 0 | 0  | 2  | 956928   | 1.00E+00 | 1 |
| FECH     | 304947  | 352  | 38  | 1119264 | 301176  | 0 | 2 | 3 | 0 | 1  | 6  | 676756   | 1.00E+00 | 1 |
| NPHP4    | 508577  | 370  | 13  | 3592396 | 1103600 | 0 | 3 | 6 | 0 | 2  | 7  | 2149528  | 1.00E+00 | 1 |
| GLRA3    | 62161   | 797  | -15 | 1215028 | 313280  | 0 | 4 | 2 | 0 | 0  | 2  | 313280   | 1.00E+00 | 1 |
| SDK2     | 182941  | 571  | -22 | 5510168 | 1640092 | 0 | 2 | 5 | 0 | 10 | 20 | 6075140  | 1.00E+00 | 1 |
| MTOR     | 577167  | 416  | 32  | 6583864 | 1829840 | 0 | 5 | 6 | 0 | 27 | 28 | 10197620 | 1.00E+00 | 1 |
| SPIRE2   | 1220713 | 219  | 43  | 1802072 | 550732  | 0 | 4 | 5 | 0 | 1  | 5  | 737276   | 1.00E+00 | 1 |
| SRGAP3   | 373293  | 469  | 22  | 2882532 | 768960  | 0 | 4 | 5 | 0 | 1  | 6  | 1378432  | 1.00E+00 | 1 |
| OR8H3    | 9992    | 1007 | -32 | 771808  | 231044  | 0 | 4 | 6 | 0 | 2  | 14 | 692064   | 1.00E+00 | 1 |
| PKDREJ   | 519654  | 205  | 31  | 5574248 | 1647568 | 0 | 6 | 7 | 0 | 43 | 59 | 16573224 | 1.00E+00 | 1 |

|          |         |      |     |         |         |   |    |   |   |    |    |         |          |   |
|----------|---------|------|-----|---------|---------|---|----|---|---|----|----|---------|----------|---|
| ATP9A    | 171625  | 419  | 0   | 2709160 | 763976  | 0 | 6  | 4 | 0 | 0  | 4  | 763976  | 1.00E+00 | 1 |
| PLOD2    | 118043  | 471  | -12 | 2009620 | 503384  | 0 | 4  | 2 | 0 | 1  | 3  | 646140  | 1.00E+00 | 1 |
| LRRC8A   | 1644028 | 201  | 14  | 2000720 | 606268  | 0 | 1  | 7 | 0 | 5  | 17 | 3102540 | 1.00E+00 | 1 |
| C12orf66 | 472096  | 296  | -17 | 1127096 | 312568  | 0 | 5  | 3 | 0 | 0  | 3  | 312568  | 1.00E+00 | 1 |
| C2orf47  | 237591  | 673  | 22  | 739056  | 215736  | 0 | 2  | 2 | 0 | 0  | 2  | 215736  | 1.00E+00 | 1 |
| TSLP     | 205349  | 738  | 6   | 416164  | 109292  | 0 | 1  | 1 | 0 | 0  | 1  | 109292  | 1.00E+00 | 1 |
| SERPIND1 | 435437  | 288  | 41  | 1275904 | 343184  | 0 | 6  | 4 | 0 | 0  | 4  | 343184  | 1.00E+00 | 1 |
| CENPL    | 441912  | 417  | 9   | 995732  | 278392  | 0 | 2  | 3 | 0 | 0  | 3  | 278392  | 1.00E+00 | 1 |
| SCN11A   | 276625  | 707  | 18  | 4639392 | 1208976 | 0 | 10 | 9 | 0 | 2  | 12 | 2178364 | 1.00E+00 | 1 |
| VEPH1    | 202651  | 739  | 5   | 2262736 | 586688  | 0 | 5  | 5 | 0 | 2  | 6  | 966540  | 1.00E+00 | 1 |
| NUF2     | 130027  | 852  | -9  | 1258104 | 287292  | 0 | 2  | 3 | 0 | 1  | 5  | 643292  | 1.00E+00 | 1 |
| LSM7     | 1503606 | 267  | 31  | 280528  | 69776   | 0 | 1  | 1 | 0 | 0  | 1  | 69776   | 1.00E+00 | 1 |
| TXNDC16  | 396835  | 518  | 14  | 2166616 | 561056  | 0 | 9  | 5 | 0 | 1  | 5  | 657532  | 1.00E+00 | 1 |
| ZMIZ1    | 319778  | 442  | 39  | 2727316 | 784268  | 0 | 8  | 8 | 0 | 2  | 11 | 1496624 | 1.00E+00 | 1 |
| EPAS1    | 375634  | 213  | 28  | 2247428 | 607336  | 0 | 5  | 4 | 0 | 0  | 4  | 607336  | 1.00E+00 | 1 |
| TPTE     | 30271   | 1268 | -81 | 1482740 | 375580  | 0 | 12 | 8 | 0 | 0  | 8  | 375580  | 1.00E+00 | 1 |
| OR10P1   | 1678592 | 523  | -8  | 744752  | 260236  | 0 | 1  | 3 | 0 | 1  | 5  | 440372  | 1.00E+00 | 1 |
| EIF4G2   | 793205  | 266  | 21  | 2388760 | 610184  | 0 | 8  | 4 | 0 | 0  | 4  | 610184  | 1.00E+00 | 1 |
| DCTN5    | 544239  | 561  | 38  | 484160  | 125668  | 0 | 1  | 1 | 0 | 0  | 1  | 125668  | 1.00E+00 | 1 |
| NTM      | 9703    | 1115 | -5  | 991816  | 284444  | 0 | 4  | 5 | 0 | 0  | 5  | 284444  | 1.00E+00 | 1 |
| RCAN2    | 55610   | 819  | 8   | 502672  | 144536  | 0 | 2  | 2 | 0 | 0  | 2  | 144536  | 1.00E+00 | 1 |
| THUMPD3  | 703818  | 404  | 32  | 1317912 | 348168  | 0 | 3  | 3 | 0 | 0  | 3  | 348168  | 1.00E+00 | 1 |
| WIP1     | 699214  | 233  | -15 | 1163052 | 322536  | 0 | 2  | 4 | 0 | 0  | 4  | 322536  | 1.00E+00 | 1 |
| PLXNB1   | 1401411 | 263  | 32  | 5300128 | 1697408 | 0 | 8  | 6 | 0 | 13 | 30 | 6945916 | 1.00E+00 | 1 |
| TPH2     | 223598  | 619  | -18 | 1277684 | 338200  | 0 | 3  | 4 | 0 | 0  | 4  | 338200  | 1.00E+00 | 1 |
| DOCK2    | 94542   | 680  | 33  | 4887524 | 1199008 | 0 | 9  | 7 | 0 | 1  | 7  | 1582064 | 1.00E+00 | 1 |
| GRIK5    | 886688  | 438  | 31  | 2454620 | 767536  | 0 | 11 | 7 | 0 | 0  | 7  | 767536  | 1.00E+00 | 1 |
| LTBP4    | 869282  | 226  | 37  | 4341420 | 1311504 | 0 | 9  | 5 | 0 | 0  | 5  | 1311504 | 1.00E+00 | 1 |
| KRI1     | 2036812 | 226  | 23  | 1894988 | 458884  | 0 | 8  | 8 | 0 | 4  | 19 | 1627988 | 1.00E+00 | 1 |
| ACSL6    | 331471  | 484  | 25  | 1954796 | 535780  | 0 | 1  | 4 | 0 | 3  | 5  | 1080816 | 1.00E+00 | 1 |
| ZIM2     | 221899  | 902  | -70 | 1366684 | 339980  | 0 | 1  | 3 | 0 | 8  | 24 | 3006420 | 1.00E+00 | 1 |
| EPS15L1  | 793775  | 258  | 19  | 2258108 | 609472  | 0 | 7  | 5 | 0 | 0  | 5  | 609472  | 1.00E+00 | 1 |
| KIAA1468 | 133045  | 374  | 40  | 3144904 | 873980  | 0 | 6  | 6 | 0 | 1  | 8  | 1326456 | 1.00E+00 | 1 |



|          |         |      |     |         |         |   |    |   |   |    |    |          |          |   |
|----------|---------|------|-----|---------|---------|---|----|---|---|----|----|----------|----------|---|
| GALNTL6  | 5263    | 1023 | -13 | 1572452 | 403348  | 0 | 10 | 4 | 0 | 0  | 4  | 403348   | 1.00E+00 | 1 |
| RNF150   | 134725  | 790  | -13 | 1113924 | 318264  | 0 | 2  | 2 | 0 | 0  | 2  | 318264   | 1.00E+00 | 1 |
| KDM1A    | 715760  | 153  | 29  | 2250632 | 644716  | 0 | 7  | 5 | 0 | 0  | 5  | 644716   | 1.00E+00 | 1 |
| NAALAD2  | 131926  | 1141 | -22 | 1944828 | 506232  | 0 | 4  | 5 | 0 | 3  | 7  | 985408   | 1.00E+00 | 1 |
| POC5     | 265325  | 605  | 19  | 1499828 | 406552  | 0 | 2  | 2 | 0 | 0  | 2  | 406552   | 1.00E+00 | 1 |
| ENO2     | 2704950 | 211  | 47  | 1121400 | 319332  | 0 | 2  | 2 | 0 | 0  | 2  | 319332   | 1.00E+00 | 1 |
| BTN3A2   | 378286  | 330  | 51  | 864012  | 243504  | 0 | 2  | 3 | 0 | 0  | 3  | 243504   | 1.00E+00 | 1 |
| CLTCL1   | 488349  | 222  | 11  | 4258472 | 1138132 | 0 | 7  | 6 | 0 | 9  | 19 | 3907812  | 1.00E+00 | 1 |
| DAXX     | 1456953 | 262  | 30  | 1898192 | 569956  | 0 | 6  | 6 | 0 | 2  | 9  | 980068   | 1.00E+00 | 1 |
| CDK18    | 679311  | 268  | 34  | 1312572 | 369528  | 0 | 2  | 6 | 0 | 2  | 9  | 787116   | 1.00E+00 | 1 |
| OR2J2    | 162844  | 808  | 12  | 766112  | 237808  | 0 | 3  | 4 | 0 | 0  | 4  | 237808   | 1.00E+00 | 1 |
| ERAP2    | 393863  | 469  | 58  | 2499832 | 651836  | 0 | 2  | 3 | 0 | 3  | 8  | 1797088  | 1.00E+00 | 1 |
| IGFN1    | 572258  | 333  | 23  | 9173764 | 2808128 | 0 | 3  | 3 | 0 | 23 | 20 | 11862632 | 1.00E+00 | 1 |
| ZNF41    | 791516  | NaN  | 27  | 2023504 | 488432  | 0 | 2  | 2 | 0 | 2  | 4  | 853332   | 1.00E+00 | 1 |
| C12orf57 | 2704950 | 211  | 47  | 324316  | 95408   | 0 | 1  | 3 | 0 | 0  | 3  | 95408    | 1.00E+00 | 1 |
| ETV4     | 1093430 | 148  | 21  | 1257392 | 347812  | 0 | 4  | 4 | 0 | 0  | 4  | 347812   | 1.00E+00 | 1 |
| LDLRAD3  | 240340  | 434  | -10 | 886440  | 245640  | 0 | 2  | 3 | 0 | 0  | 3  | 245640   | 1.00E+00 | 1 |
| AP1G1    | 460697  | NaN  | 24  | 2156292 | 588468  | 0 | 6  | 4 | 0 | 1  | 6  | 825564   | 1.00E+00 | 1 |
| IHH      | 823105  | 324  | 37  | 996444  | 334284  | 0 | 1  | 3 | 0 | 1  | 5  | 517980   | 1.00E+00 | 1 |
| ADRM1    | 990360  | 252  | 9   | 1034892 | 311856  | 0 | 5  | 5 | 0 | 0  | 5  | 311856   | 1.00E+00 | 1 |
| RPL3     | 932556  | 250  | 69  | 1052692 | 284444  | 0 | 1  | 4 | 0 | 1  | 4  | 503028   | 1.00E+00 | 1 |
| RIMBP3   | 616215  | NaN  | 23  | 3962992 | 1291568 | 0 | 2  | 2 | 0 | 4  | 7  | 2545044  | 1.00E+00 | 1 |
| SYT5     | 1036976 | 266  | -1  | 969388  | 304736  | 0 | 5  | 4 | 0 | 0  | 4  | 304736   | 1.00E+00 | 1 |
| FICD     | 437636  | 399  | 40  | 1135284 | 343896  | 0 | 1  | 3 | 0 | 1  | 3  | 443220   | 1.00E+00 | 1 |
| FAM84B   | 203378  | 592  | -8  | 763264  | 237452  | 0 | 3  | 3 | 0 | 0  | 3  | 237452   | 1.00E+00 | 1 |
| UMOD     | 243266  | 848  | -5  | 1634752 | 463868  | 0 | 2  | 5 | 0 | 1  | 6  | 841228   | 1.00E+00 | 1 |
| C1orf21  | 258985  | 642  | -7  | 337132  | 70844   | 0 | 2  | 1 | 0 | 0  | 1  | 70844    | 1.00E+00 | 1 |
| BLOC1S2  | 1071291 | 198  | 56  | 383768  | 93628   | 0 | 3  | 2 | 0 | 0  | 2  | 93628    | 1.00E+00 | 1 |
| UBL3     | 322680  | 335  | 21  | 316840  | 78320   | 0 | 1  | 1 | 0 | 0  | 1  | 78320    | 1.00E+00 | 1 |
| IL4I1    | 1676173 | 205  | 41  | 1484876 | 453544  | 0 | 5  | 4 | 0 | 0  | 4  | 453544   | 1.00E+00 | 1 |
| RAP2A    | 343135  | 533  | 28  | 466360  | 127448  | 0 | 2  | 2 | 0 | 0  | 2  | 127448   | 1.00E+00 | 1 |
| HIST1H1C | 408919  | 685  | 43  | 519048  | 170880  | 0 | 6  | 5 | 0 | 0  | 5  | 170880   | 1.00E+00 | 1 |
| CPSF1    | 2043455 | 200  | 36  | 3703468 | 1085444 | 0 | 6  | 5 | 0 | 2  | 13 | 2164836  | 1.00E+00 | 1 |

|          |         |      |     |         |         |   |    |   |   |    |    |         |          |   |
|----------|---------|------|-----|---------|---------|---|----|---|---|----|----|---------|----------|---|
| OTOP2    | 1045089 | 223  | 25  | 1395164 | 434320  | 0 | 5  | 4 | 0 | 0  | 4  | 434320  | 1.00E+00 | 1 |
| LRRC30   | 38085   | 336  | -37 | 737276  | 229264  | 0 | 1  | 3 | 0 | 1  | 7  | 534356  | 1.00E+00 | 1 |
| TTC32    | 479338  | 390  | 9   | 398720  | 96832   | 0 | 1  | 1 | 0 | 0  | 1  | 96832   | 1.00E+00 | 1 |
| ALDH3A1  | 550749  | 220  | -13 | 1172308 | 325028  | 0 | 4  | 3 | 0 | 0  | 3  | 325028  | 1.00E+00 | 1 |
| PCDHB8   | 915569  | 724  | -11 | 1939844 | 627628  | 0 | 10 | 8 | 0 | 1  | 14 | 1258460 | 1.00E+00 | 1 |
| DPAGT1   | 1390854 | 195  | 58  | 1036316 | 308296  | 0 | 6  | 5 | 0 | 0  | 5  | 308296  | 1.00E+00 | 1 |
| FABP6    | 198270  | 448  | 38  | 484160  | 116056  | 0 | 1  | 1 | 0 | 0  | 1  | 116056  | 1.00E+00 | 1 |
| AP1M2    | 2036812 | 226  | 23  | 1111432 | 296192  | 0 | 2  | 6 | 0 | 4  | 19 | 1627988 | 1.00E+00 | 1 |
| ZNF512   | 1192074 | 306  | 43  | 1494488 | 383056  | 0 | 1  | 4 | 0 | 3  | 9  | 1304028 | 1.00E+00 | 1 |
| HNRNPA0  | 427110  | 409  | 28  | 739056  | 241368  | 0 | 2  | 3 | 0 | 0  | 3  | 241368  | 1.00E+00 | 1 |
| CENPA    | 1334693 | 378  | 40  | 356000  | 112852  | 0 | 1  | 2 | 0 | 0  | 2  | 112852  | 1.00E+00 | 1 |
| KCNF1    | 668276  | 514  | 23  | 1217876 | 368104  | 0 | 5  | 4 | 0 | 0  | 4  | 368104  | 1.00E+00 | 1 |
| VWA3B    | 361135  | 716  | 28  | 3372388 | 892136  | 0 | 13 | 6 | 0 | 0  | 6  | 892136  | 1.00E+00 | 1 |
| STK40    | 636943  | 212  | 28  | 1120688 | 318976  | 0 | 1  | 2 | 0 | 1  | 3  | 412604  | 1.00E+00 | 1 |
| DEFA5    | 124400  | 715  | -3  | 236384  | 74404   | 0 | 1  | 2 | 0 | 0  | 2  | 74404   | 1.00E+00 | 1 |
| RPL24    | 548150  | 419  | 13  | 421148  | 110716  | 0 | 2  | 2 | 0 | 0  | 2  | 110716  | 1.00E+00 | 1 |
| HTR1A    | 3636    | 1003 | -20 | 1021720 | 332504  | 0 | 6  | 5 | 0 | 0  | 5  | 332504  | 1.00E+00 | 1 |
| FAM53A   | 902379  | 350  | 33  | 971524  | 319688  | 0 | 2  | 3 | 0 | 0  | 3  | 319688  | 1.00E+00 | 1 |
| HCK      | 1039298 | 386  | 21  | 1384840 | 363476  | 0 | 5  | 4 | 0 | 0  | 4  | 363476  | 1.00E+00 | 1 |
| APC2     | 2352825 | 221  | 38  | 5475280 | 1966544 | 0 | 3  | 4 | 0 | 17 | 18 | 6317576 | 1.00E+00 | 1 |
| GPRC5D   | 710389  | 169  | 14  | 859740  | 255252  | 0 | 1  | 2 | 0 | 0  | 2  | 255252  | 1.00E+00 | 1 |
| ENPP2    | 255492  | 552  | 7   | 2512292 | 615880  | 0 | 8  | 7 | 0 | 1  | 7  | 686012  | 1.00E+00 | 1 |
| AADAT    | 132912  | 831  | -13 | 1133860 | 286580  | 0 | 2  | 2 | 0 | 0  | 2  | 286580  | 1.00E+00 | 1 |
| ZBTB6    | 407115  | 430  | 26  | 1086512 | 279460  | 0 | 2  | 2 | 0 | 0  | 2  | 279460  | 1.00E+00 | 1 |
| ATXN10   | 498533  | 172  | 15  | 1235320 | 336776  | 0 | 1  | 3 | 0 | 0  | 3  | 336776  | 1.00E+00 | 1 |
| RDM1     | 703538  | 424  | 31  | 808120  | 208616  | 0 | 1  | 2 | 0 | 1  | 3  | 307584  | 1.00E+00 | 1 |
| C1orf216 | 1177566 | 325  | 35  | 571024  | 170168  | 0 | 1  | 2 | 0 | 0  | 2  | 170168  | 1.00E+00 | 1 |
| DFNA5    | 254601  | 464  | 21  | 1263088 | 367748  | 0 | 5  | 4 | 0 | 0  | 4  | 367748  | 1.00E+00 | 1 |
| ST6GAL1  | 447917  | 433  | 32  | 1050912 | 274476  | 0 | 3  | 5 | 0 | 2  | 5  | 402992  | 1.00E+00 | 1 |
| PIWIL4   | 367057  | 478  | 6   | 2229272 | 584908  | 0 | 4  | 4 | 0 | 0  | 4  | 584908  | 1.00E+00 | 1 |
| LCA5L    | 339359  | 346  | 25  | 1743332 | 438592  | 0 | 2  | 2 | 0 | 0  | 2  | 438592  | 1.00E+00 | 1 |
| MEIG1    | 256253  | 571  | 35  | 241012  | 52688   | 0 | 1  | 1 | 0 | 0  | 1  | 52688   | 1.00E+00 | 1 |
| CAPS     | 1166723 | 392  | 36  | 487008  | 143112  | 0 | 1  | 2 | 0 | 0  | 2  | 143112  | 1.00E+00 | 1 |

|          |         |     |     |          |         |   |    |    |   |    |    |          |          |   |
|----------|---------|-----|-----|----------|---------|---|----|----|---|----|----|----------|----------|---|
| HTT      | 661693  | 464 | 41  | 8035276  | 2316848 | 0 | 13 | 10 | 0 | 1  | 11 | 2731588  | 1.00E+00 | 1 |
| TMEM208  | 1109491 | 150 | 46  | 451764   | 127092  | 0 | 1  | 2  | 0 | 0  | 2  | 127092   | 1.00E+00 | 1 |
| WNT9B    | 526881  | 366 | 16  | 881100   | 280884  | 0 | 2  | 5  | 0 | 1  | 7  | 468140   | 1.00E+00 | 1 |
| KCNA4    | 30326   | 940 | -38 | 1628700  | 466716  | 0 | 6  | 4  | 0 | 1  | 8  | 771808   | 1.00E+00 | 1 |
| PIP4K2A  | 196977  | 577 | 25  | 1072628  | 269848  | 0 | 4  | 3  | 0 | 0  | 3  | 269848   | 1.00E+00 | 1 |
| GPN2     | 1025094 | 188 | 34  | 781064   | 232468  | 0 | 4  | 4  | 0 | 0  | 4  | 232468   | 1.00E+00 | 1 |
| HSD17B6  | 2637730 | 154 | 47  | 804204   | 231756  | 0 | 1  | 2  | 0 | 0  | 2  | 231756   | 1.00E+00 | 1 |
| CACNA1C  | 457513  | 765 | 26  | 6085820  | 1721260 | 0 | 10 | 8  | 0 | 5  | 10 | 2550384  | 1.00E+00 | 1 |
| DAGLA    | 1235604 | 208 | 58  | 2607700  | 815240  | 0 | 4  | 6  | 0 | 1  | 6  | 873980   | 1.00E+00 | 1 |
| AHNAK    | 2746294 | 204 | 49  | 14780764 | 4226432 | 0 | 47 | 21 | 0 | 3  | 22 | 4867232  | 1.00E+00 | 1 |
| BCL11B   | 316817  | 629 | -40 | 2193672  | 686724  | 0 | 3  | 5  | 0 | 4  | 18 | 2486304  | 1.00E+00 | 1 |
| ANKRD11  | 1263742 | 322 | 40  | 6702056  | 1880392 | 0 | 21 | 11 | 0 | 0  | 11 | 1880392  | 1.00E+00 | 1 |
| HSD11B1L | 879991  | 295 | 21  | 920972   | 299752  | 0 | 1  | 4  | 0 | 2  | 5  | 463512   | 1.00E+00 | 1 |
| HN1L     | 1591571 | 320 | 37  | 490568   | 140620  | 0 | 1  | 2  | 0 | 0  | 2  | 140620   | 1.00E+00 | 1 |
| IGFL1    | 1150094 | 196 | 22  | 297260   | 73336   | 0 | 2  | 2  | 0 | 0  | 2  | 73336    | 1.00E+00 | 1 |
| AGR2     | 361606  | 385 | -7  | 474192   | 119616  | 0 | 2  | 3  | 0 | 0  | 3  | 119616   | 1.00E+00 | 1 |
| CENPO    | 299133  | 374 | 39  | 775012   | 219296  | 0 | 1  | 4  | 0 | 1  | 4  | 327876   | 1.00E+00 | 1 |
| MMP7     | 524316  | 359 | 17  | 694912   | 187256  | 0 | 1  | 2  | 0 | 0  | 2  | 187256   | 1.00E+00 | 1 |
| FCGBP    | 1312608 | 522 | 29  | 13328640 | 4143840 | 0 | 24 | 17 | 0 | 45 | 71 | 21546188 | 1.00E+00 | 1 |
| MYO1E    | 773032  | 386 | 43  | 2935932  | 732648  | 0 | 7  | 7  | 0 | 1  | 7  | 1076544  | 1.00E+00 | 1 |
| TTC23L   | 245995  | 558 | -4  | 955860   | 246708  | 0 | 1  | 5  | 0 | 1  | 5  | 445712   | 1.00E+00 | 1 |
| TRAFD1   | 730140  | 239 | 40  | 1510864  | 404060  | 0 | 3  | 3  | 0 | 0  | 3  | 404060   | 1.00E+00 | 1 |
| C1QTNF1  | 592461  | 285 | 15  | 720188   | 196156  | 0 | 5  | 4  | 0 | 0  | 4  | 196156   | 1.00E+00 | 1 |
| ZNF285   | 715346  | 528 | -44 | 1537208  | 369172  | 0 | 5  | 4  | 0 | 0  | 4  | 369172   | 1.00E+00 | 1 |
| LRRC52   | 262572  | 574 | -22 | 777860   | 234604  | 0 | 1  | 6  | 0 | 1  | 7  | 468852   | 1.00E+00 | 1 |
| PRKCD    | 845193  | 192 | 46  | 1794596  | 447136  | 0 | 6  | 6  | 0 | 2  | 8  | 786048   | 1.00E+00 | 1 |
| SLC26A6  | 1386275 | 212 | 37  | 1958712  | 602352  | 0 | 3  | 5  | 0 | 0  | 5  | 602352   | 1.00E+00 | 1 |
| RSPH6A   | 906385  | 203 | 41  | 1812040  | 509792  | 0 | 7  | 5  | 0 | 0  | 5  | 509792   | 1.00E+00 | 1 |
| PYHIN1   | 97254   | 914 | 6   | 1297264  | 347456  | 0 | 6  | 4  | 0 | 0  | 4  | 347456   | 1.00E+00 | 1 |
| MSH5     | 2509866 | 183 | 32  | 2204352  | 631188  | 0 | 2  | 4  | 0 | 1  | 4  | 762196   | 1.00E+00 | 1 |
| STAC     | 151436  | 827 | -17 | 1065508  | 270560  | 0 | 4  | 3  | 0 | 0  | 3  | 270560   | 1.00E+00 | 1 |
| BCAR3    | 595695  | 173 | 9   | 2093992  | 599504  | 0 | 4  | 7  | 0 | 1  | 7  | 759704   | 1.00E+00 | 1 |
| NKRD20A  | NaN     | NaN | NaN | 4340352  | 1059456 | 0 | 1  | 1  | 0 | 7  | 15 | 4747616  | 1.00E+00 | 1 |

|          |         |      |     |         |        |   |   |    |   |   |    |         |          |   |
|----------|---------|------|-----|---------|--------|---|---|----|---|---|----|---------|----------|---|
| STX11    | 298896  | 322  | 23  | 724104  | 202920 | 0 | 2 | 3  | 0 | 0 | 3  | 202920  | 1.00E+00 | 1 |
| CHST15   | 149497  | 632  | 19  | 1448920 | 377360 | 0 | 6 | 4  | 0 | 0 | 4  | 377360  | 1.00E+00 | 1 |
| SP7      | 1701810 | 166  | 58  | 1045216 | 347456 | 0 | 2 | 4  | 0 | 0 | 4  | 347456  | 1.00E+00 | 1 |
| KCNJ9    | 829863  | 386  | 17  | 962980  | 303668 | 0 | 1 | 3  | 0 | 0 | 3  | 303668  | 1.00E+00 | 1 |
| PLSCR5   | 124275  | 768  | -20 | 710220  | 191172 | 0 | 1 | 2  | 0 | 0 | 2  | 191172  | 1.00E+00 | 1 |
| PCDHA1   | 861651  | 606  | 2   | 2331444 | 758280 | 0 | 9 | 11 | 0 | 1 | 17 | 1530088 | 1.00E+00 | 1 |
| MRPL41   | 1315685 | 404  | 41  | 346032  | 103596 | 0 | 1 | 3  | 0 | 0 | 3  | 103596  | 1.00E+00 | 1 |
| GML      | 447193  | 438  | 36  | 413672  | 108580 | 0 | 1 | 2  | 0 | 0 | 2  | 108580  | 1.00E+00 | 1 |
| GALP     | 500375  | 480  | -61 | 322180  | 74048  | 0 | 2 | 2  | 0 | 0 | 2  | 74048   | 1.00E+00 | 1 |
| ACOX1    | 1667990 | 194  | 22  | 1855116 | 498756 | 0 | 4 | 6  | 0 | 0 | 6  | 498756  | 1.00E+00 | 1 |
| PYGL     | 388112  | 431  | 28  | 2215032 | 583128 | 0 | 1 | 2  | 0 | 0 | 2  | 583128  | 1.00E+00 | 1 |
| MRTO4    | 788190  | 448  | 30  | 641512  | 157352 | 0 | 1 | 2  | 0 | 0 | 2  | 157352  | 1.00E+00 | 1 |
| PAN-P2RY | 1675365 | 272  | 15  | 1058388 | 296904 | 0 | 1 | 4  | 0 | 0 | 4  | 296904  | 1.00E+00 | 1 |
| ZNF320   | 557083  | 1008 | -39 | 1322540 | 324316 | 0 | 4 | 7  | 0 | 1 | 10 | 738344  | 1.00E+00 | 1 |
| LHX1     | 625114  | 462  | 21  | 1026704 | 296548 | 0 | 4 | 4  | 0 | 0 | 4  | 296548  | 1.00E+00 | 1 |
| NIPSNAP1 | 713942  | 190  | 39  | 758280  | 195444 | 0 | 2 | 4  | 0 | 0 | 4  | 195444  | 1.00E+00 | 1 |
| HPR      | 426658  | 372  | 14  | 895340  | 242080 | 0 | 2 | 3  | 0 | 0 | 3  | 242080  | 1.00E+00 | 1 |
| NCKAP1L  | 643138  | 151  | 35  | 2950884 | 793524 | 0 | 8 | 7  | 0 | 0 | 7  | 793524  | 1.00E+00 | 1 |
| NFATC2   | 363545  | 482  | 28  | 2400508 | 735140 | 0 | 7 | 9  | 0 | 0 | 9  | 735140  | 1.00E+00 | 1 |
| SLC28A1  | 355337  | 291  | 25  | 1723040 | 505876 | 0 | 1 | 3  | 0 | 0 | 3  | 505876  | 1.00E+00 | 1 |
| ACR      | 669934  | 295  | 41  | 1044504 | 328944 | 0 | 1 | 3  | 0 | 0 | 3  | 328944  | 1.00E+00 | 1 |
| CLEC18B  | 475713  | 278  | 44  | 1192956 | 319332 | 0 | 2 | 3  | 0 | 0 | 3  | 319332  | 1.00E+00 | 1 |
| PCBP3    | 724898  | 611  | 38  | 973304  | 274120 | 0 | 1 | 3  | 0 | 0 | 3  | 274120  | 1.00E+00 | 1 |
| RTP2     | 88374   | 374  | 24  | 574228  | 154148 | 0 | 2 | 3  | 0 | 0 | 3  | 154148  | 1.00E+00 | 1 |
| MYADM    | 849708  | 486  | -50 | 766468  | 272696 | 0 | 1 | 4  | 0 | 0 | 4  | 272696  | 1.00E+00 | 1 |
| AKAP7    | 165730  | 682  | 15  | 979000  | 228908 | 0 | 1 | 2  | 0 | 0 | 2  | 228908  | 1.00E+00 | 1 |
| MAP3K10  | 980250  | 400  | 23  | 2321832 | 776436 | 0 | 3 | 5  | 0 | 1 | 7  | 942688  | 1.00E+00 | 1 |
| ZNF135   | 1187584 | 694  | -42 | 1851912 | 476328 | 0 | 1 | 5  | 0 | 2 | 10 | 1277684 | 1.00E+00 | 1 |
| TNNC2    | 742720  | 180  | 48  | 444288  | 95052  | 0 | 2 | 2  | 0 | 0 | 2  | 95052   | 1.00E+00 | 1 |
| ZNF12    | 721477  | 506  | 39  | 1823076 | 430404 | 0 | 6 | 6  | 0 | 0 | 6  | 430404  | 1.00E+00 | 1 |
| APBA2    | 161108  | 927  | -21 | 1933792 | 520472 | 0 | 8 | 7  | 0 | 0 | 7  | 520472  | 1.00E+00 | 1 |
| C8orf59  | 99038   | 1463 | 13  | 269492  | 62656  | 0 | 1 | 2  | 0 | 0 | 2  | 62656   | 1.00E+00 | 1 |
| SHCBP1   | 422519  | 419  | -38 | 1761844 | 447848 | 0 | 5 | 5  | 0 | 0 | 5  | 447848  | 1.00E+00 | 1 |

|          |         |      |     |         |         |   |    |   |   |   |    |         |          |   |
|----------|---------|------|-----|---------|---------|---|----|---|---|---|----|---------|----------|---|
| USP35    | 549791  | 208  | 26  | 2516564 | 791032  | 0 | 4  | 8 | 0 | 3 | 9  | 1278040 | 1.00E+00 | 1 |
| ACBD7    | 254900  | 620  | 21  | 242792  | 57316   | 0 | 3  | 3 | 0 | 0 | 3  | 57316   | 1.00E+00 | 1 |
| NPY2R    | 49938   | 944  | -5  | 945536  | 282664  | 0 | 2  | 4 | 0 | 0 | 4  | 282664  | 1.00E+00 | 1 |
| TMOD2    | 443665  | 165  | 27  | 927736  | 238520  | 0 | 2  | 3 | 0 | 0 | 3  | 238520  | 1.00E+00 | 1 |
| NSMCE2   | 328239  | 420  | 38  | 663940  | 156284  | 0 | 1  | 2 | 0 | 0 | 2  | 156284  | 1.00E+00 | 1 |
| KCNH1    | 153525  | 862  | -7  | 2508376 | 706304  | 0 | 2  | 7 | 0 | 2 | 7  | 1133148 | 1.00E+00 | 1 |
| KCNG4    | 582429  | 364  | 12  | 1274124 | 398364  | 0 | 2  | 4 | 0 | 0 | 4  | 398364  | 1.00E+00 | 1 |
| CCDC40   | 663665  | 237  | 27  | 2946612 | 798864  | 0 | 7  | 7 | 0 | 0 | 7  | 798864  | 1.00E+00 | 1 |
| HEXDC    | 2591323 | 179  | 28  | 1467788 | 461020  | 0 | 4  | 5 | 0 | 0 | 5  | 461020  | 1.00E+00 | 1 |
| PUS1     | 383304  | 269  | 30  | 1074408 | 318264  | 0 | 2  | 4 | 0 | 0 | 4  | 318264  | 1.00E+00 | 1 |
| C19orf40 | 481910  | 448  | -16 | 549308  | 159844  | 0 | 1  | 3 | 0 | 0 | 3  | 159844  | 1.00E+00 | 1 |
| NAT9     | 983414  | 484  | 17  | 551444  | 140620  | 0 | 2  | 3 | 0 | 0 | 3  | 140620  | 1.00E+00 | 1 |
| DERA     | 328516  | 534  | 10  | 826632  | 229620  | 0 | 1  | 3 | 0 | 0 | 3  | 229620  | 1.00E+00 | 1 |
| PRR11    | 834161  | 507  | 4   | 927736  | 267356  | 0 | 3  | 4 | 0 | 0 | 4  | 267356  | 1.00E+00 | 1 |
| ERCC3    | 428616  | 175  | 23  | 2033116 | 537560  | 0 | 7  | 5 | 0 | 0 | 5  | 537560  | 1.00E+00 | 1 |
| SLC45A1  | 971531  | 321  | 25  | 1839452 | 590248  | 0 | 7  | 9 | 0 | 0 | 9  | 590248  | 1.00E+00 | 1 |
| CETP     | 842366  | 125  | 52  | 1294416 | 354576  | 0 | 2  | 5 | 0 | 0 | 5  | 354576  | 1.00E+00 | 1 |
| RPS20    | 344871  | 489  | 59  | 397652  | 108580  | 0 | 1  | 3 | 0 | 0 | 3  | 108580  | 1.00E+00 | 1 |
| QARS     | 1898051 | 203  | 36  | 2020300 | 568532  | 0 | 5  | 5 | 0 | 0 | 5  | 568532  | 1.00E+00 | 1 |
| QKI      | 81134   | 1131 | 1   | 965472  | 264864  | 0 | 1  | 3 | 0 | 0 | 3  | 264864  | 1.00E+00 | 1 |
| RBP4     | 450249  | 305  | 20  | 531508  | 137060  | 0 | 3  | 4 | 0 | 0 | 4  | 137060  | 1.00E+00 | 1 |
| MYH13    | 83322   | 731  | -47 | 5103972 | 1277328 | 0 | 14 | 9 | 0 | 0 | 9  | 1277328 | 1.00E+00 | 1 |
| GPR173   | 878367  | NaN  | 63  | 914564  | 288004  | 0 | 2  | 5 | 0 | 0 | 5  | 288004  | 1.00E+00 | 1 |
| GMPR     | 117199  | 561  | 26  | 891068  | 251692  | 0 | 2  | 4 | 0 | 0 | 4  | 251692  | 1.00E+00 | 1 |
| 34GALNT1 | 1329939 | 344  | 52  | 1319336 | 433252  | 0 | 1  | 4 | 0 | 0 | 4  | 433252  | 1.00E+00 | 1 |
| STMN2    | 147465  | 518  | -12 | 476684  | 119260  | 0 | 1  | 3 | 0 | 0 | 3  | 119260  | 1.00E+00 | 1 |
| SNRPD2   | 950605  | 194  | 45  | 310432  | 81524   | 0 | 1  | 3 | 0 | 0 | 3  | 81524   | 1.00E+00 | 1 |
| ITGAX    | 1122895 | 481  | -2  | 2995740 | 859740  | 0 | 2  | 4 | 0 | 0 | 4  | 859740  | 1.00E+00 | 1 |
| SNX18    | 68402   | 643  | 7   | 1767540 | 521184  | 0 | 3  | 5 | 0 | 0 | 5  | 521184  | 1.00E+00 | 1 |
| LPAR6    | NaN     | NaN  | NaN | 869708  | 235672  | 0 | 6  | 9 | 0 | 0 | 9  | 235672  | 1.00E+00 | 1 |
| SLC2A1   | 918944  | 334  | 35  | 1230336 | 387684  | 0 | 2  | 5 | 0 | 0 | 5  | 387684  | 1.00E+00 | 1 |
| SH3GL1   | 2100413 | 216  | 32  | 960132  | 260592  | 0 | 5  | 6 | 0 | 0 | 6  | 260592  | 1.00E+00 | 1 |
| LRRC37A2 | 502280  | 340  | 12  | 4256692 | 1253120 | 0 | 1  | 4 | 0 | 3 | 14 | 3471000 | 1.00E+00 | 1 |

|         |         |      |     |          |         |   |    |    |   |    |     |          |          |   |
|---------|---------|------|-----|----------|---------|---|----|----|---|----|-----|----------|----------|---|
| KHNYN   | 897668  | 265  | 29  | 1684948  | 520472  | 0 | 2  | 5  | 0 | 0  | 5   | 520472   | 1.00E+00 | 1 |
| RASGRP4 | 1459788 | 221  | 4   | 1715920  | 511928  | 0 | 1  | 4  | 0 | 0  | 4   | 511928   | 1.00E+00 | 1 |
| ATP2B2  | 673500  | 458  | 50  | 3177656  | 897832  | 0 | 9  | 8  | 0 | 0  | 8   | 897832   | 1.00E+00 | 1 |
| GRB2    | 1869080 | 157  | 24  | 574584   | 140976  | 0 | 1  | 3  | 0 | 0  | 3   | 140976   | 1.00E+00 | 1 |
| PKD1    | 1696923 | 224  | 41  | 10435072 | 3547184 | 0 | 7  | 11 | 0 | 15 | 40  | 10600968 | 1.00E+00 | 1 |
| C5AR1   | 1132395 | 232  | 41  | 844788   | 285156  | 0 | 3  | 5  | 0 | 0  | 5   | 285156   | 1.00E+00 | 1 |
| ZNF425  | 605000  | 242  | 27  | 1929164  | 496264  | 0 | 10 | 8  | 0 | 0  | 8   | 496264   | 1.00E+00 | 1 |
| CD40    | 559725  | 526  | 55  | 767536   | 159488  | 0 | 2  | 3  | 0 | 0  | 3   | 159488   | 1.00E+00 | 1 |
| DCST1   | 1696720 | 214  | 44  | 1814532  | 521184  | 0 | 5  | 7  | 0 | 0  | 7   | 521184   | 1.00E+00 | 1 |
| DNAH2   | 2107779 | 232  | 25  | 11396628 | 3151668 | 0 | 18 | 11 | 0 | 7  | 23  | 5245304  | 1.00E+00 | 1 |
| SSTR1   | 49574   | 544  | -46 | 950876   | 305092  | 0 | 3  | 7  | 0 | 0  | 7   | 305092   | 1.00E+00 | 1 |
| THPO    | 1447013 | 268  | 44  | 1007480  | 143824  | 0 | 4  | 2  | 0 | 0  | 2   | 143824   | 1.00E+00 | 1 |
| PRKCA   | 206987  | 603  | -27 | 1787476  | 439304  | 0 | 3  | 5  | 0 | 0  | 5   | 439304   | 1.00E+00 | 1 |
| GSTA5   | 572117  | 455  | 9   | 593096   | 147028  | 0 | 1  | 4  | 0 | 0  | 4   | 147028   | 1.00E+00 | 1 |
| RGS9    | 391807  | 516  | -16 | 1820584  | 475616  | 0 | 5  | 8  | 0 | 0  | 8   | 475616   | 1.00E+00 | 1 |
| MYO18A  | 1560056 | 159  | 33  | 5276276  | 1483096 | 0 | 7  | 12 | 0 | 2  | 15  | 2152020  | 1.00E+00 | 1 |
| PILRB   | 1430637 | 204  | 54  | 665720   | 81880   | 0 | 2  | 2  | 0 | 0  | 2   | 81880    | 1.00E+00 | 1 |
| CAMK2G  | 998685  | 191  | 42  | 1568892  | 412248  | 0 | 2  | 6  | 0 | 1  | 7   | 497332   | 1.00E+00 | 1 |
| CFL1    | 3779084 | 287  | 42  | 433964   | 113920  | 0 | 1  | 5  | 0 | 0  | 5   | 113920   | 1.00E+00 | 1 |
| ADAM11  | 1224408 | 175  | 31  | 2008552  | 569600  | 0 | 2  | 10 | 0 | 1  | 11  | 867572   | 1.00E+00 | 1 |
| SLC1A4  | 653388  | 340  | 36  | 1301180  | 436456  | 0 | 1  | 7  | 0 | 0  | 7   | 436456   | 1.00E+00 | 1 |
| KCNH2   | 775233  | 547  | 25  | 3161992  | 1019228 | 0 | 4  | 9  | 0 | 0  | 9   | 1019228  | 1.00E+00 | 1 |
| LRRIQ4  | 404285  | 689  | 13  | 1410828  | 403704  | 0 | 1  | 6  | 0 | 0  | 6   | 403704   | 1.00E+00 | 1 |
| FZD1    | 64493   | 946  | -2  | 1573520  | 502672  | 0 | 2  | 9  | 0 | 0  | 9   | 502672   | 1.00E+00 | 1 |
| PCDHAC2 | 931701  | 643  | -10 | 2520124  | 814172  | 0 | 4  | 11 | 0 | 0  | 11  | 814172   | 1.00E+00 | 1 |
| CACNA1S | 522609  | 490  | 31  | 4846940  | 1341052 | 0 | 12 | 16 | 0 | 0  | 16  | 1341052  | 1.00E+00 | 1 |
| A2BP1   | 2474    | 1138 | -47 | 1215384  | 321468  | 0 | 0  | 0  | 0 | 28 | 48  | 14145304 | 1        | 1 |
| A2LD1   | NaN     | NaN  | NaN | 370952   | 126736  | 0 | 0  | 0  | 0 | 50 | 119 | 40864172 | 1        | 1 |
| A4GALT  | 808038  | 168  | 72  | 861164   | 277324  | 0 | 0  | 1  | 0 | 47 | 52  | 18983344 | 1        | 1 |
| AARSD1  | 1507064 | 201  | 26  | 1573876  | 423284  | 0 | 0  | 0  | 0 | 22 | 18  | 8144924  | 1        | 1 |
| ASDHPP1 | 86519   | 753  | -16 | 807408   | 207192  | 0 | 0  | 0  | 0 | 50 | 81  | 23487456 | 1        | 1 |
| ABAT    | 402778  | 358  | -10 | 1324320  | 344964  | 0 | 0  | 0  | 0 | 16 | 12  | 6492016  | 1        | 1 |
| ABCD4   | 652027  | 358  | 47  | 1580284  | 441440  | 0 | 0  | 2  | 0 | 50 | 51  | 20215460 | 1        | 1 |

|         |         |      |     |         |        |   |   |   |   |    |     |          |   |   |
|---------|---------|------|-----|---------|--------|---|---|---|---|----|-----|----------|---|---|
| ABCF2   | 610106  | 290  | 32  | 1660028 | 440728 | 0 | 0 | 1 | 0 | 50 | 52  | 23170260 | 1 | 1 |
| ABHD14A | 1045639 | 224  | 36  | 660380  | 228196 | 0 | 0 | 0 | 0 | 50 | 51  | 17801068 | 1 | 1 |
| ABHD5   | 103561  | 437  | 33  | 898900  | 248132 | 0 | 0 | 1 | 0 | 50 | 68  | 24633420 | 1 | 1 |
| ABP1    | 763140  | 604  | 19  | 1864728 | 563904 | 0 | 0 | 0 | 0 | 0  | 0   | 563904   | 1 | 1 |
| ABTB1   | 679358  | 336  | 45  | 1227844 | 356000 | 0 | 0 | 1 | 0 | 50 | 52  | 21051348 | 1 | 1 |
| ACAP1   | 1911735 | 206  | 36  | 1900684 | 565328 | 0 | 0 | 2 | 0 | 50 | 69  | 22072000 | 1 | 1 |
| ACCN1   | 34504   | 1007 | -15 | 1885020 | 555360 | 0 | 0 | 0 | 0 | 4  | 2   | 1396232  | 1 | 1 |
| ACCN2   | 1003045 | 211  | 56  | 1487368 | 401924 | 0 | 0 | 0 | 0 | 1  | 2   | 778928   | 1 | 1 |
| ACCN3   | 622098  | 373  | 41  | 1469212 | 402992 | 0 | 0 | 0 | 0 | 2  | 2   | 1758996  | 1 | 1 |
| ACCN4   | 554323  | 403  | 33  | 1653620 | 521896 | 0 | 0 | 0 | 0 | 26 | 23  | 10254224 | 1 | 1 |
| ACCN5   | 43787   | 643  | -2  | 1329304 | 332504 | 0 | 0 | 0 | 0 | 45 | 57  | 18464296 | 1 | 1 |
| ACN9    | 146007  | 987  | -9  | 321824  | 86152  | 0 | 0 | 0 | 0 | 50 | 40  | 20438316 | 1 | 1 |
| ACOT1   | NaN     | NaN  | NaN | 1022788 | 337844 | 0 | 0 | 0 | 0 | 50 | 116 | 39983428 | 1 | 1 |
| ACOT13  | 421216  | 362  | 24  | 367392  | 107868 | 0 | 0 | 1 | 0 | 0  | 1   | 107868   | 1 | 1 |
| ACP6    | NaN     | NaN  | NaN | 1112144 | 302956 | 0 | 0 | 1 | 0 | 50 | 117 | 39948540 | 1 | 1 |
| ACPL2   | 333903  | 352  | 22  | 1225708 | 336776 | 0 | 0 | 0 | 0 | 33 | 29  | 13439356 | 1 | 1 |
| ACY1    | 1045639 | 224  | 36  | 1071560 | 298684 | 0 | 0 | 0 | 0 | 50 | 51  | 17801068 | 1 | 1 |
| ACYP1   | 919043  | 222  | 47  | 336064  | 81524  | 0 | 0 | 0 | 0 | 50 | 76  | 25981236 | 1 | 1 |
| ACYP2   | 619188  | 448  | 11  | 265932  | 67284  | 0 | 0 | 0 | 0 | 50 | 61  | 19308728 | 1 | 1 |
| ADAT3   | NaN     | NaN  | NaN | 828056  | 299752 | 0 | 0 | 0 | 0 | 50 | 116 | 39945336 | 1 | 1 |
| ADC     | 756118  | 264  | 21  | 1174088 | 341404 | 0 | 0 | 0 | 0 | 31 | 33  | 11578544 | 1 | 1 |
| ADCYAP1 | 272034  | 531  | -13 | 447492  | 137772 | 0 | 0 | 0 | 0 | 50 | 63  | 21974100 | 1 | 1 |
| ADI1    | 254699  | 390  | 16  | 473480  | 118192 | 0 | 0 | 0 | 0 | 50 | 49  | 21518776 | 1 | 1 |
| ADIG    | 525955  | 539  | 39  | 215024  | 50908  | 0 | 0 | 0 | 0 | 50 | 78  | 25602808 | 1 | 1 |
| ADM2    | 1075525 | 207  | 42  | 353864  | 127804 | 0 | 0 | 1 | 0 | 11 | 15  | 4417248  | 1 | 1 |
| ADO     | 176901  | 852  | 32  | 650768  | 217516 | 0 | 0 | 1 | 0 | 43 | 60  | 20312292 | 1 | 1 |
| ADPRHL2 | 853740  | 282  | 27  | 912428  | 277324 | 0 | 0 | 2 | 0 | 14 | 17  | 5956948  | 1 | 1 |
| ADRB3   | 672861  | 356  | 25  | 950520  | 364188 | 0 | 0 | 0 | 0 | 34 | 29  | 15405544 | 1 | 1 |
| AG2     | NaN     | NaN  | NaN | 300464  | 93628  | 0 | 0 | 0 | 0 | 50 | 116 | 39739212 | 1 | 1 |
| AGAP11  | 401785  | 164  | 45  | 1384840 | 397652 | 0 | 0 | 0 | 0 | 18 | 9   | 5793188  | 1 | 1 |
| AGAP7   | NaN     | NaN  | NaN | 1680676 | 472412 | 0 | 0 | 0 | 0 | 50 | 116 | 40117996 | 1 | 1 |
| AGAP8   | NaN     | NaN  | NaN | 1683524 | 469564 | 0 | 0 | 0 | 0 | 50 | 116 | 40115148 | 1 | 1 |
| AGBL3   | NaN     | NaN  | NaN | 2420088 | 599148 | 0 | 0 | 0 | 0 | 7  | 14  | 4287308  | 1 | 1 |

|         |         |     |     |         |         |   |   |   |   |    |     |          |   |   |
|---------|---------|-----|-----|---------|---------|---|---|---|---|----|-----|----------|---|---|
| AGER    | 2119974 | 392 | 28  | 1099684 | 273764  | 0 | 0 | 2 | 0 | 27 | 33  | 11704212 | 1 | 1 |
| AGPHD1  | 506023  | 375 | 39  | 966896  | 253828  | 0 | 0 | 0 | 0 | 50 | 65  | 19264228 | 1 | 1 |
| AGXT2L1 | 104349  | 499 | 21  | 1323252 | 334284  | 0 | 0 | 0 | 0 | 50 | 39  | 19491000 | 1 | 1 |
| AGXT2L2 | 672705  | 448 | 46  | 1168748 | 327520  | 0 | 0 | 0 | 0 | 50 | 73  | 25444744 | 1 | 1 |
| AHCY    | 962066  | 151 | 50  | 1116772 | 309008  | 0 | 0 | 1 | 0 | 50 | 68  | 22738432 | 1 | 1 |
| AHSP    | 826452  | 688 | -17 | 266644  | 71912   | 0 | 0 | 1 | 0 | 5  | 18  | 2545756  | 1 | 1 |
| AIF1    | 2517285 | 220 | 35  | 565328  | 148096  | 0 | 0 | 0 | 0 | 50 | 55  | 21824936 | 1 | 1 |
| AIF1L   | 829407  | 293 | 36  | 480956  | 111784  | 0 | 0 | 1 | 0 | 48 | 83  | 24890096 | 1 | 1 |
| AIG1    | 298429  | 699 | 13  | 623356  | 165896  | 0 | 0 | 1 | 0 | 50 | 59  | 19534432 | 1 | 1 |
| AK2     | 807536  | 233 | 27  | 627272  | 174796  | 0 | 0 | 3 | 0 | 4  | 10  | 1786052  | 1 | 1 |
| AK3     | 231882  | 608 | 30  | 575296  | 172304  | 0 | 0 | 0 | 0 | 11 | 13  | 3441452  | 1 | 1 |
| AK3L1   | 280010  | 351 | -9  | 578144  | 156640  | 0 | 0 | 0 | 0 | 50 | 40  | 21132516 | 1 | 1 |
| AKAP2   | NaN     | NaN | NaN | 2354584 | 700964  | 0 | 0 | 0 | 0 | 7  | 14  | 4389124  | 1 | 1 |
| AKD1    | 345757  | 686 | 21  | 5087952 | 1219656 | 0 | 0 | 0 | 0 | 0  | 0   | 1219656  | 1 | 1 |
| ALDH3A2 | 544087  | 332 | -2  | 1325744 | 365968  | 0 | 0 | 1 | 0 | 50 | 67  | 23348260 | 1 | 1 |
| ALDH6A1 | 495634  | 236 | 40  | 1370956 | 395516  | 0 | 0 | 1 | 0 | 50 | 35  | 16762616 | 1 | 1 |
| ALG14   | 275272  | 425 | -9  | 543256  | 166964  | 0 | 0 | 0 | 0 | 50 | 42  | 21086948 | 1 | 1 |
| ALG3    | 1460188 | 257 | 49  | 1148812 | 351728  | 0 | 0 | 0 | 0 | 14 | 11  | 5039180  | 1 | 1 |
| ALG8    | 551110  | 208 | 23  | 1414744 | 394448  | 0 | 0 | 1 | 0 | 28 | 36  | 12193000 | 1 | 1 |
| ALKBH2  | 595266  | 487 | 20  | 658600  | 194732  | 0 | 0 | 1 | 0 | 50 | 72  | 19690360 | 1 | 1 |
| ALKBH4  | 611052  | 174 | 63  | 740480  | 241012  | 0 | 0 | 1 | 0 | 50 | 68  | 17004696 | 1 | 1 |
| ALKBH7  | 943949  | 407 | 31  | 539340  | 186900  | 0 | 0 | 1 | 0 | 50 | 47  | 18083732 | 1 | 1 |
| ALOX12  | 1645511 | 360 | 14  | 1700612 | 484516  | 0 | 0 | 1 | 0 | 25 | 37  | 12739104 | 1 | 1 |
| ALOX5AP | 381672  | 451 | 76  | 422216  | 116056  | 0 | 0 | 0 | 0 | 50 | 60  | 18444360 | 1 | 1 |
| ALPPL2  | 307666  | 204 | 37  | 1337848 | 414740  | 0 | 0 | 1 | 0 | 20 | 21  | 6327188  | 1 | 1 |
| ALS2CR4 | 435399  | 534 | 25  | 1080816 | 302244  | 0 | 0 | 0 | 0 | 13 | 19  | 4474564  | 1 | 1 |
| ALS2CR8 | 543912  | 392 | 33  | 1877900 | 508012  | 0 | 0 | 0 | 0 | 44 | 43  | 19528380 | 1 | 1 |
| ALX3    | 571576  | 400 | 29  | 841228  | 275900  | 0 | 0 | 0 | 0 | 49 | 55  | 19542620 | 1 | 1 |
| AMAC1   | 753178  | 505 | 16  | 793168  | 295124  | 0 | 0 | 0 | 0 | 33 | 33  | 12656868 | 1 | 1 |
| AMAC1L2 | 499514  | 671 | 36  | 791744  | 296548  | 0 | 0 | 0 | 0 | 50 | 54  | 19916064 | 1 | 1 |
| AMAC1L3 | NaN     | NaN | NaN | 799220  | 293344  | 0 | 0 | 0 | 0 | 50 | 116 | 39938928 | 1 | 1 |
| AMBP    | 244063  | 558 | 0   | 923464  | 245996  | 0 | 0 | 3 | 0 | 2  | 5   | 977220   | 1 | 1 |
| AMD1    | 321448  | 282 | 31  | 890712  | 216804  | 0 | 0 | 0 | 0 | 50 | 66  | 20005064 | 1 | 1 |



|          |         |      |     |         |         |   |   |   |   |    |     |          |   |   |
|----------|---------|------|-----|---------|---------|---|---|---|---|----|-----|----------|---|---|
| AMELY    | 0       | 0    | 0   | 497688  | 142044  | 0 | 0 | 1 | 0 | 4  | 1   | 883592   | 1 | 1 |
| AMY1B    | NaN     | NaN  | NaN | 4035972 | 1021008 | 0 | 0 | 1 | 0 | 7  | 15  | 4709168  | 1 | 1 |
| AMY1C    | 24508   | 1029 | -14 | 4035972 | 1021008 | 0 | 0 | 1 | 0 | 2  | 3   | 1819516  | 1 | 1 |
| ANAPC10  | 182708  | 1139 | 20  | 489144  | 123888  | 0 | 0 | 0 | 0 | 50 | 43  | 21505960 | 1 | 1 |
| ANAPC11  | 3798594 | 211  | 19  | 530796  | 113208  | 0 | 0 | 0 | 0 | 34 | 28  | 11428668 | 1 | 1 |
| ANAPC13  | 254024  | 188  | 16  | 201496  | 47348   | 0 | 0 | 0 | 0 | 50 | 41  | 17953436 | 1 | 1 |
| ANG      | NaN     | NaN  | NaN | 368104  | 110360  | 0 | 0 | 0 | 0 | 50 | 116 | 39755944 | 1 | 1 |
| ANGPTL7  | NaN     | NaN  | NaN | 899968  | 228908  | 0 | 0 | 2 | 0 | 26 | 42  | 11806028 | 1 | 1 |
| ANKRD18A | NaN     | NaN  | NaN | 2616956 | 630832  | 0 | 0 | 0 | 0 | 7  | 14  | 4318992  | 1 | 1 |
| ANKRD20A | NaN     | NaN  | NaN | 6509816 | 1589896 | 0 | 0 | 0 | 0 | 0  | 0   | 1589896  | 1 | 1 |
| ANKRD22  | 175425  | 289  | 26  | 503028  | 133500  | 0 | 0 | 0 | 0 | 50 | 42  | 20400580 | 1 | 1 |
| ANKRD31  | NaN     | NaN  | NaN | 4887168 | 1219656 | 0 | 0 | 0 | 0 | 0  | 0   | 1219656  | 1 | 1 |
| ANKRD33E | NaN     | NaN  | NaN | 1200432 | 398364  | 0 | 0 | 0 | 0 | 50 | 116 | 40043948 | 1 | 1 |
| ANKRD34C | NaN     | NaN  | NaN | 1315064 | 406552  | 0 | 0 | 0 | 0 | 50 | 116 | 40052136 | 1 | 1 |
| ANKRD37  | 173409  | 422  | 20  | 416876  | 112852  | 0 | 0 | 1 | 0 | 4  | 6   | 1787120  | 1 | 1 |
| ANKRD43  | 718028  | 356  | 58  | 1268072 | 494128  | 0 | 0 | 0 | 0 | 32 | 24  | 12039208 | 1 | 1 |
| ANKRD5   | 194301  | 442  | -34 | 1984344 | 543612  | 0 | 0 | 0 | 0 | 11 | 15  | 4131736  | 1 | 1 |
| ANKRD56  | 411278  | 462  | 26  | 1909228 | 634748  | 0 | 0 | 0 | 0 | 6  | 7   | 2876480  | 1 | 1 |
| ANKRD57  | 191347  | 329  | 22  | 1260596 | 424708  | 0 | 0 | 0 | 0 | 5  | 6   | 2713432  | 1 | 1 |
| ANKRD58  | 649508  | NaN  | 73  | 744396  | 270204  | 0 | 0 | 0 | 0 | 1  | 3   | 517624   | 1 | 1 |
| ANKRD9   | 1673146 | 191  | 42  | 737632  | 287648  | 0 | 0 | 0 | 0 | 45 | 80  | 22534444 | 1 | 1 |
| ANP32C   | NaN     | NaN  | NaN | 600216  | 151656  | 0 | 0 | 0 | 0 | 50 | 116 | 39797240 | 1 | 1 |
| ANTXR1   | 338803  | 288  | 14  | 1531512 | 429336  | 0 | 0 | 1 | 0 | 50 | 41  | 20521264 | 1 | 1 |
| ANUBL1   | 111914  | 603  | 36  | 1852268 | 514420  | 0 | 0 | 0 | 0 | 6  | 3   | 1678184  | 1 | 1 |
| ANXA8L1  | NaN     | NaN  | NaN | 1766472 | 429336  | 0 | 0 | 2 | 0 | 50 | 118 | 40074920 | 1 | 1 |
| ANXA8L2  | NaN     | NaN  | NaN | 883236  | 214668  | 0 | 0 | 0 | 0 | 50 | 116 | 39860252 | 1 | 1 |
| AP1AR    | 181002  | 351  | 22  | 814172  | 195088  | 0 | 0 | 0 | 0 | 50 | 52  | 21104748 | 1 | 1 |
| AP1S1    | 1044715 | 199  | 39  | 420792  | 105732  | 0 | 0 | 0 | 0 | 50 | 49  | 18578928 | 1 | 1 |
| AP1S3    | 263604  | 197  | 16  | 416520  | 97188   | 0 | 0 | 0 | 0 | 50 | 41  | 18108652 | 1 | 1 |
| AP4S1    | 432061  | 238  | 23  | 542544  | 131364  | 0 | 0 | 1 | 0 | 21 | 16  | 5943064  | 1 | 1 |
| APH1B    | 450620  | 272  | 49  | 657532  | 192596  | 0 | 0 | 1 | 0 | 50 | 54  | 21410908 | 1 | 1 |
| APITD1   | 771199  | 383  | 28  | 559988  | 138484  | 0 | 0 | 0 | 0 | 50 | 65  | 24479272 | 1 | 1 |
| APLN     | 340263  | NaN  | 46  | 195088  | 63368   | 0 | 0 | 0 | 0 | 50 | 58  | 20655476 | 1 | 1 |

|           |         |      |     |         |         |   |   |   |   |    |     |          |   |   |
|-----------|---------|------|-----|---------|---------|---|---|---|---|----|-----|----------|---|---|
| APOB48R   | NaN     | NaN  | NaN | 2678188 | 830192  | 0 | 0 | 0 | 0 | 7  | 14  | 4518352  | 1 | 1 |
| APOBEC3A  | 1413709 | 372  | 44  | 521896  | 135992  | 0 | 0 | 3 | 0 | 0  | 3   | 135992   | 1 | 1 |
| APOD      | 794351  | 315  | 38  | 490924  | 134924  | 0 | 0 | 0 | 0 | 50 | 61  | 22903972 | 1 | 1 |
| APOL4     | 1233084 | 331  | 28  | 948740  | 232468  | 0 | 0 | 2 | 0 | 8  | 10  | 4440032  | 1 | 1 |
| APOL6     | 936853  | 205  | -13 | 857960  | 252760  | 0 | 0 | 1 | 0 | 50 | 64  | 17894340 | 1 | 1 |
| AQP12A    | 1077835 | 446  | 25  | 717696  | 245640  | 0 | 0 | 0 | 0 | 50 | 79  | 25908612 | 1 | 1 |
| AQP12B    | 1077835 | 446  | 25  | 738700  | 258812  | 0 | 0 | 0 | 0 | 50 | 79  | 25908612 | 1 | 1 |
| AQPEP     | 372067  | 763  | 17  | 2569964 | 686368  | 0 | 0 | 0 | 0 | 8  | 4   | 3405852  | 1 | 1 |
| ARC       | 300961  | 567  | 26  | 976508  | 295480  | 0 | 0 | 2 | 0 | 1  | 3   | 721256   | 1 | 1 |
| ARF1      | 702621  | 391  | 5   | 473480  | 126736  | 0 | 0 | 0 | 0 | 50 | 46  | 17014308 | 1 | 1 |
| ARF6      | 680412  | 174  | 41  | 434676  | 129228  | 0 | 0 | 1 | 0 | 17 | 21  | 6831284  | 1 | 1 |
| ARFIP2    | 424988  | 469  | 20  | 868996  | 256676  | 0 | 0 | 0 | 0 | 31 | 40  | 13844484 | 1 | 1 |
| ARGLU1    | 169398  | 1237 | 11  | 694200  | 196512  | 0 | 0 | 0 | 0 | 50 | 61  | 19830980 | 1 | 1 |
| ARHGAP1   | 939971  | 176  | 44  | 1152016 | 309008  | 0 | 0 | 3 | 0 | 5  | 3   | 1077256  | 1 | 1 |
| ARHGAP2L  | NaN     | NaN  | NaN | 3439316 | 1129588 | 0 | 0 | 0 | 0 | 0  | 0   | 1129588  | 1 | 1 |
| ARHGAP4L  | NaN     | NaN  | NaN | 1714496 | 510148  | 0 | 0 | 0 | 0 | 9  | 16  | 4867588  | 1 | 1 |
| ARHGAP4L2 | NaN     | NaN  | NaN | 2313644 | 590248  | 0 | 0 | 0 | 0 | 7  | 14  | 4278408  | 1 | 1 |
| ARHGAP8   | NaN     | NaN  | NaN | 1255612 | 359204  | 0 | 0 | 0 | 0 | 50 | 116 | 40004788 | 1 | 1 |
| ARHGDIB   | 360900  | 426  | 8   | 533644  | 134924  | 0 | 0 | 1 | 0 | 50 | 56  | 20049920 | 1 | 1 |
| ARHGDIG   | 1340678 | 205  | 43  | 571736  | 175864  | 0 | 0 | 0 | 0 | 50 | 57  | 21858756 | 1 | 1 |
| ARHGFE3L  | NaN     | NaN  | NaN | 2246004 | 610896  | 0 | 0 | 0 | 0 | 7  | 14  | 4299056  | 1 | 1 |
| ARHGFE3L2 | 233591  | 486  | 15  | 578144  | 139552  | 0 | 0 | 1 | 0 | 39 | 36  | 12641560 | 1 | 1 |
| ARL1      | 283715  | 649  | 2   | 482736  | 121752  | 0 | 0 | 0 | 0 | 50 | 47  | 18604916 | 1 | 1 |
| ARL10     | 563059  | 347  | 37  | 605200  | 194732  | 0 | 0 | 0 | 0 | 50 | 66  | 22259256 | 1 | 1 |
| ARL11     | 425192  | 296  | 62  | 482380  | 153080  | 0 | 0 | 1 | 0 | 50 | 48  | 18413032 | 1 | 1 |
| ARL17A    | NaN     | NaN  | NaN | 1138132 | 303668  | 0 | 0 | 0 | 0 | 50 | 116 | 39949252 | 1 | 1 |
| ARL17B    | 372453  | 231  | 22  | 569244  | 151656  | 0 | 0 | 0 | 0 | 50 | 51  | 21352880 | 1 | 1 |
| ARL2      | 3151458 | 209  | 52  | 474548  | 137416  | 0 | 0 | 0 | 0 | 50 | 83  | 23753744 | 1 | 1 |
| ARL5A     | 269131  | 610  | 15  | 479176  | 118904  | 0 | 0 | 0 | 0 | 50 | 61  | 21553664 | 1 | 1 |
| ARL5C     | NaN     | NaN  | NaN | 475616  | 121396  | 0 | 0 | 0 | 0 | 50 | 116 | 39766980 | 1 | 1 |
| ARMC1     | 145894  | 455  | 4   | 731224  | 201140  | 0 | 0 | 1 | 0 | 50 | 50  | 17452900 | 1 | 1 |
| ARMS2     | 252955  | 279  | 5   | 265932  | 86508   | 0 | 0 | 0 | 0 | 50 | 51  | 21633052 | 1 | 1 |
| ARPC3     | 964525  | 206  | 50  | 490212  | 111072  | 0 | 0 | 0 | 0 | 50 | 64  | 19341480 | 1 | 1 |

|          |         |     |     |         |        |   |   |   |   |    |     |          |   |   |
|----------|---------|-----|-----|---------|--------|---|---|---|---|----|-----|----------|---|---|
| ARPC5L   | 1125524 | 207 | 41  | 394448  | 113920 | 0 | 0 | 0 | 0 | 50 | 59  | 18818160 | 1 | 1 |
| ARPM1    | 397180  | 820 | -9  | 933788  | 265576 | 0 | 0 | 0 | 0 | 9  | 6   | 3514076  | 1 | 1 |
| ART4     | 340728  | 578 | -4  | 798152  | 221788 | 0 | 0 | 1 | 0 | 50 | 47  | 15743388 | 1 | 1 |
| ART5     | 537999  | 403 | 23  | 730156  | 222500 | 0 | 0 | 0 | 0 | 50 | 51  | 22444732 | 1 | 1 |
| ASAH2B   | 131929  | 508 | 36  | 435744  | 119616 | 0 | 0 | 0 | 0 | 50 | 65  | 20578224 | 1 | 1 |
| ASAM     | 713809  | 216 | 13  | 940552  | 283376 | 0 | 0 | 0 | 0 | 50 | 65  | 24429788 | 1 | 1 |
| ASB10    | 611046  | 337 | 38  | 1350664 | 461732 | 0 | 0 | 4 | 0 | 21 | 35  | 9435068  | 1 | 1 |
| ASB12    | 57924   | NaN | 2   | 761840  | 235672 | 0 | 0 | 1 | 0 | 50 | 63  | 26324776 | 1 | 1 |
| ASB3     | NaN     | NaN | NaN | 1352444 | 360628 | 0 | 0 | 0 | 0 | 50 | 116 | 40006212 | 1 | 1 |
| ASB9     | 204248  | NaN | 17  | 789608  | 214312 | 0 | 0 | 1 | 0 | 50 | 70  | 21277052 | 1 | 1 |
| ASCL2    | NaN     | NaN | NaN | 448916  | 176932 | 0 | 0 | 0 | 0 | 50 | 116 | 39822516 | 1 | 1 |
| ASCL4    | 119393  | 805 | 22  | 415096  | 142400 | 0 | 0 | 1 | 0 | 16 | 14  | 6831284  | 1 | 1 |
| ASF1B    | 1034381 | 321 | 36  | 514776  | 148452 | 0 | 0 | 0 | 0 | 50 | 92  | 22111516 | 1 | 1 |
| ASIP     | 962066  | 151 | 50  | 335352  | 101460 | 0 | 0 | 0 | 0 | 50 | 68  | 22738432 | 1 | 1 |
| ASPDH    | 762018  | 517 | 35  | 735140  | 238876 | 0 | 0 | 0 | 0 | 50 | 59  | 22902548 | 1 | 1 |
| ATAD3A   | 1714469 | 248 | 27  | 1624784 | 475972 | 0 | 0 | 3 | 0 | 1  | 4   | 970456   | 1 | 1 |
| ATF3     | 418310  | 224 | 22  | 520116  | 142044 | 0 | 0 | 0 | 0 | 50 | 47  | 18982276 | 1 | 1 |
| ATF5     | 1679101 | 205 | 45  | 671060  | 239944 | 0 | 0 | 0 | 0 | 50 | 76  | 20785416 | 1 | 1 |
| ATG12    | 384075  | 759 | 1   | 359204  | 105376 | 0 | 0 | 0 | 0 | 50 | 61  | 23231848 | 1 | 1 |
| ATG4A    | 201673  | NaN | 25  | 1072984 | 256676 | 0 | 0 | 1 | 0 | 50 | 59  | 19172380 | 1 | 1 |
| ATP1B3   | 467997  | 345 | 28  | 734428  | 188324 | 0 | 0 | 2 | 0 | 3  | 4   | 937704   | 1 | 1 |
| ATP5D    | 2214581 | 234 | 29  | 417944  | 142756 | 0 | 0 | 0 | 0 | 50 | 68  | 20485664 | 1 | 1 |
| ATP5J2   | 1327454 | 288 | 60  | 284088  | 64080  | 0 | 0 | 0 | 0 | 50 | 58  | 17222924 | 1 | 1 |
| ATP5L    | 963668  | 192 | 48  | 264152  | 77608  | 0 | 0 | 0 | 0 | 50 | 58  | 20862668 | 1 | 1 |
| ATP5L2   | NaN     | NaN | NaN | 244216  | 79388  | 0 | 0 | 0 | 0 | 50 | 116 | 39724972 | 1 | 1 |
| ATP6V0C  | 2085452 | 321 | 49  | 380564  | 127804 | 0 | 0 | 1 | 0 | 50 | 76  | 21050280 | 1 | 1 |
| ATP6V0D1 | 1099149 | 153 | 45  | 915988  | 243860 | 0 | 0 | 1 | 0 | 50 | 49  | 19815672 | 1 | 1 |
| ATP6V1F  | 845100  | 361 | 49  | 301888  | 89000  | 0 | 0 | 0 | 0 | 50 | 80  | 25321924 | 1 | 1 |
| ATP6V1G1 | 288977  | 221 | 10  | 312212  | 77608  | 0 | 0 | 1 | 0 | 1  | 2   | 311856   | 1 | 1 |
| ATP6V1G2 | 105821  | 404 | -16 | 378072  | 69420  | 0 | 0 | 0 | 0 | 50 | 47  | 20170248 | 1 | 1 |
| ATPBD4   | 189209  | 811 | -14 | 877540  | 218228 | 0 | 0 | 0 | 0 | 50 | 84  | 23079836 | 1 | 1 |
| ATPIF1   | 779314  | 213 | 33  | 316840  | 80456  | 0 | 0 | 0 | 0 | 50 | 49  | 18363192 | 1 | 1 |
| ATXN1L   | NaN     | NaN | NaN | 1657180 | 553580 | 0 | 0 | 0 | 0 | 9  | 16  | 4911020  | 1 | 1 |

|          |         |      |     |         |         |   |   |   |   |    |     |          |   |   |
|----------|---------|------|-----|---------|---------|---|---|---|---|----|-----|----------|---|---|
| ATXN7L3E | NaN     | NaN  | NaN | 244216  | 69776   | 0 | 0 | 0 | 0 | 50 | 116 | 39715360 | 1 | 1 |
| AVEN     | 409752  | 499  | 0   | 911360  | 275188  | 0 | 0 | 2 | 0 | 50 | 63  | 22123976 | 1 | 1 |
| AVP      | 835590  | 288  | 54  | 414384  | 127092  | 0 | 0 | 0 | 0 | 50 | 59  | 17488856 | 1 | 1 |
| AVPI1    | 514755  | 143  | 54  | 371664  | 111072  | 0 | 0 | 0 | 0 | 50 | 73  | 19766188 | 1 | 1 |
| AZI1     | 1748003 | 243  | 28  | 2757932 | 812392  | 0 | 0 | 0 | 0 | 0  | 0   | 812392   | 1 | 1 |
| 33GALNT  | 340975  | 583  | -20 | 848348  | 219652  | 0 | 0 | 1 | 0 | 50 | 76  | 22958440 | 1 | 1 |
| B3GALT6  | 2356409 | 196  | 27  | 776436  | 283020  | 0 | 0 | 0 | 0 | 50 | 61  | 26748416 | 1 | 1 |
| B3GALTL  | 183118  | 606  | 27  | 1325744 | 332860  | 0 | 0 | 0 | 0 | 24 | 22  | 11398052 | 1 | 1 |
| B3GAT1   | 270422  | 686  | 5   | 822360  | 272340  | 0 | 0 | 2 | 0 | 12 | 19  | 5967628  | 1 | 1 |
| B3GNT1   | 1963418 | 182  | 55  | 1015668 | 321468  | 0 | 0 | 0 | 0 | 44 | 48  | 19173092 | 1 | 1 |
| B4GALT2  | 875223  | 214  | 39  | 935568  | 285156  | 0 | 0 | 1 | 0 | 50 | 67  | 19898264 | 1 | 1 |
| B4GALT5  | 1040657 | 132  | 55  | 1011752 | 268780  | 0 | 0 | 1 | 0 | 50 | 63  | 21322264 | 1 | 1 |
| BAALC    | 461588  | 584  | 15  | 371308  | 105020  | 0 | 0 | 0 | 0 | 50 | 64  | 19808908 | 1 | 1 |
| BACE1    | 436617  | 360  | 36  | 1267716 | 374868  | 0 | 0 | 2 | 0 | 50 | 59  | 19286656 | 1 | 1 |
| BAD      | 1613996 | 257  | 65  | 491636  | 139552  | 0 | 0 | 0 | 0 | 50 | 66  | 21324400 | 1 | 1 |
| BAGE     | NaN     | NaN  | NaN | 120684  | 32040   | 0 | 0 | 0 | 0 | 50 | 116 | 39677624 | 1 | 1 |
| BAGE2    | NaN     | NaN  | NaN | 302244  | 86508   | 0 | 0 | 0 | 0 | 50 | 116 | 39732092 | 1 | 1 |
| BAGE3    | NaN     | NaN  | NaN | 302244  | 86508   | 0 | 0 | 0 | 0 | 50 | 116 | 39732092 | 1 | 1 |
| BAGE4    | NaN     | NaN  | NaN | 120684  | 32040   | 0 | 0 | 0 | 0 | 50 | 116 | 39677624 | 1 | 1 |
| BAGE5    | 30235   | 1262 | -79 | 120684  | 32040   | 0 | 0 | 0 | 0 | 50 | 73  | 13278800 | 1 | 1 |
| BAI1     | 296361  | 567  | 25  | 3971536 | 1230692 | 0 | 0 | 0 | 0 | 1  | 1   | 1656468  | 1 | 1 |
| BAI2     | 1169755 | 173  | 36  | 3979368 | 1234608 | 0 | 0 | 0 | 0 | 0  | 0   | 1234608  | 1 | 1 |
| BAI3     | 11277   | 1175 | -22 | 3982928 | 1024924 | 0 | 0 | 0 | 0 | 2  | 1   | 1923468  | 1 | 1 |
| BAIAP2L2 | 1528130 | 197  | 73  | 1351376 | 402280  | 0 | 0 | 0 | 0 | 9  | 10  | 3205424  | 1 | 1 |
| BANF2    | 594840  | 432  | 1   | 262728  | 64080   | 0 | 0 | 0 | 0 | 50 | 44  | 17649768 | 1 | 1 |
| BAT1     | 2515825 | 220  | 35  | 1123180 | 294056  | 0 | 0 | 0 | 0 | 50 | 55  | 21824936 | 1 | 1 |
| BAT2     | 2517260 | 193  | 28  | 5260968 | 1781424 | 0 | 0 | 0 | 0 | 0  | 0   | 1781424  | 1 | 1 |
| BAT2L1   | 651666  | 272  | 34  | 5625512 | 1649704 | 0 | 0 | 0 | 0 | 4  | 0   | 3784280  | 1 | 1 |
| BAT2L2   | 406372  | 793  | 2   | 7013200 | 2041304 | 0 | 0 | 0 | 0 | 1  | 0   | 2228204  | 1 | 1 |
| BAT3     | 2517236 | 193  | 20  | 2821656 | 913140  | 0 | 0 | 0 | 0 | 3  | 0   | 1778576  | 1 | 1 |
| BAT4     | 2517236 | 193  | 20  | 872912  | 279460  | 0 | 0 | 0 | 0 | 50 | 63  | 27465044 | 1 | 1 |
| BAT5     | 2517236 | 193  | 20  | 1591676 | 454612  | 0 | 0 | 0 | 0 | 6  | 2   | 2321832  | 1 | 1 |
| BATF     | 691659  | 175  | 49  | 323604  | 88644   | 0 | 0 | 1 | 0 | 1  | 3   | 464224   | 1 | 1 |

|         |         |     |     |         |         |   |   |   |   |    |     |          |   |   |
|---------|---------|-----|-----|---------|---------|---|---|---|---|----|-----|----------|---|---|
| BCAS4   | 421783  | 191 | 36  | 607692  | 173016  | 0 | 0 | 1 | 0 | 9  | 12  | 3967620  | 1 | 1 |
| BCL2    | 207116  | 522 | 60  | 605912  | 202564  | 0 | 0 | 1 | 0 | 50 | 60  | 14793224 | 1 | 1 |
| BCL2L2  | 1171456 | 330 | 20  | 472056  | 158064  | 0 | 0 | 0 | 0 | 50 | 49  | 21656192 | 1 | 1 |
| BCL7C   | 1546514 | 207 | 48  | 545392  | 176576  | 0 | 0 | 0 | 0 | 50 | 59  | 22090512 | 1 | 1 |
| BCMO1   | 302391  | 288 | 1   | 1424712 | 373800  | 0 | 0 | 0 | 0 | 50 | 57  | 27106196 | 1 | 1 |
| BCORL2  | NaN     | NaN | NaN | 460308  | 117480  | 0 | 0 | 0 | 0 | 50 | 116 | 39763064 | 1 | 1 |
| BCS1L   | 1033606 | 269 | 43  | 1056608 | 321112  | 0 | 0 | 0 | 0 | 50 | 68  | 23381368 | 1 | 1 |
| BDH1    | 685310  | 263 | 39  | 876472  | 251336  | 0 | 0 | 2 | 0 | 25 | 42  | 10709192 | 1 | 1 |
| BEAN    | NaN     | NaN | NaN | 644716  | 205412  | 0 | 0 | 0 | 0 | 50 | 116 | 39850996 | 1 | 1 |
| BET1    | 467883  | 483 | 0   | 314704  | 79388   | 0 | 0 | 0 | 0 | 50 | 66  | 21215108 | 1 | 1 |
| BET1L   | 1463610 | 437 | 24  | 402636  | 117480  | 0 | 0 | 0 | 0 | 50 | 72  | 18233964 | 1 | 1 |
| BET3L   | NaN     | NaN | NaN | 474904  | 127448  | 0 | 0 | 0 | 0 | 50 | 116 | 39773032 | 1 | 1 |
| BEX2    | 455954  | NaN | 17  | 424708  | 99680   | 0 | 0 | 0 | 0 | 50 | 69  | 22928180 | 1 | 1 |
| BEX4    | 466184  | NaN | -5  | 313636  | 78320   | 0 | 0 | 1 | 0 | 2  | 6   | 1876476  | 1 | 1 |
| BEX5    | 119562  | NaN | 22  | 289428  | 73692   | 0 | 0 | 0 | 0 | 50 | 49  | 18250696 | 1 | 1 |
| BHLHA15 | 464632  | 375 | 26  | 456036  | 156996  | 0 | 0 | 0 | 0 | 50 | 53  | 18981920 | 1 | 1 |
| BHLHA9  | NaN     | NaN | NaN | 538984  | 216092  | 0 | 0 | 0 | 0 | 50 | 116 | 39861676 | 1 | 1 |
| BHLHE23 | 821863  | 447 | 61  | 532220  | 194020  | 0 | 0 | 1 | 0 | 50 | 60  | 19521260 | 1 | 1 |
| BIVM    | 195534  | 475 | 24  | 1328236 | 343184  | 0 | 0 | 0 | 0 | 50 | 40  | 16969452 | 1 | 1 |
| BLCAP   | 790368  | 549 | 52  | 216448  | 65504   | 0 | 0 | 0 | 0 | 50 | 68  | 24056344 | 1 | 1 |
| BLOC1S3 | 1230654 | 243 | 41  | 469208  | 185476  | 0 | 0 | 0 | 0 | 50 | 79  | 24609568 | 1 | 1 |
| BNIP2   | 521844  | 172 | 33  | 1130656 | 306872  | 0 | 0 | 0 | 0 | 22 | 27  | 9079068  | 1 | 1 |
| BOD1    | 255069  | 371 | 31  | 487720  | 152012  | 0 | 0 | 1 | 0 | 38 | 30  | 14418356 | 1 | 1 |
| BOD1L   | 133545  | 511 | 27  | 7791416 | 2093992 | 0 | 0 | 0 | 0 | 2  | 0   | 3169468  | 1 | 1 |
| BOK     | 1214632 | 426 | 30  | 521184  | 178356  | 0 | 0 | 3 | 0 | 1  | 4   | 606980   | 1 | 1 |
| BOLA2   | NaN     | NaN | NaN | 766112  | 235672  | 0 | 0 | 0 | 0 | 50 | 116 | 39881256 | 1 | 1 |
| BOLA2B  | 1906000 | 253 | 52  | 766112  | 235672  | 0 | 0 | 0 | 0 | 50 | 58  | 18919264 | 1 | 1 |
| BPHL    | 444075  | 435 | 41  | 749736  | 213600  | 0 | 0 | 0 | 0 | 50 | 79  | 25740224 | 1 | 1 |
| BPIL1   | 488576  | 461 | 43  | 1154508 | 380208  | 0 | 0 | 0 | 0 | 26 | 30  | 11873312 | 1 | 1 |
| BPIL2   | 371339  | 401 | 3   | 1321472 | 365968  | 0 | 0 | 0 | 0 | 26 | 36  | 12156688 | 1 | 1 |
| BPIL3   | 515931  | 491 | 46  | 1175156 | 338200  | 0 | 0 | 0 | 0 | 37 | 51  | 18754436 | 1 | 1 |
| BPY2    | NaN     | NaN | NaN | 842652  | 237096  | 0 | 0 | 0 | 0 | 50 | 116 | 39882680 | 1 | 1 |
| BPY2B   | NaN     | NaN | NaN | 842652  | 237096  | 0 | 0 | 0 | 0 | 50 | 116 | 39882680 | 1 | 1 |

|           |         |     |     |         |         |   |   |   |   |    |     |          |   |   |
|-----------|---------|-----|-----|---------|---------|---|---|---|---|----|-----|----------|---|---|
| BPY2C     | NaN     | NaN | NaN | 842652  | 237096  | 0 | 0 | 0 | 0 | 50 | 116 | 39882680 | 1 | 1 |
| BRD3      | 495575  | 398 | 40  | 1850488 | 521540  | 0 | 0 | 4 | 0 | 18 | 38  | 8431860  | 1 | 1 |
| BRI3      | 566928  | 294 | 41  | 359204  | 110716  | 0 | 0 | 0 | 0 | 50 | 37  | 18400216 | 1 | 1 |
| BRMS1L    | 188271  | 400 | 10  | 880032  | 196512  | 0 | 0 | 0 | 0 | 50 | 66  | 22056692 | 1 | 1 |
| BRP44     | 535270  | 290 | 14  | 340336  | 91136   | 0 | 0 | 0 | 0 | 50 | 57  | 21284172 | 1 | 1 |
| BRP44L    | 199596  | 556 | 18  | 285512  | 78676   | 0 | 0 | 0 | 0 | 50 | 35  | 16755496 | 1 | 1 |
| BSG       | 1647685 | 255 | -8  | 1016024 | 293344  | 0 | 0 | 0 | 0 | 49 | 53  | 18640160 | 1 | 1 |
| BSPH1     | NaN     | NaN | NaN | 370952  | 78676   | 0 | 0 | 0 | 0 | 50 | 116 | 39724260 | 1 | 1 |
| BST2      | 899127  | 211 | 26  | 462088  | 134924  | 0 | 0 | 0 | 0 | 50 | 49  | 18107584 | 1 | 1 |
| BTBD12    | 745599  | 224 | 39  | 4550392 | 1384484 | 0 | 0 | 0 | 0 | 6  | 4   | 3766836  | 1 | 1 |
| BTBD18    | NaN     | NaN | NaN | 1749384 | 543612  | 0 | 0 | 0 | 0 | 9  | 16  | 4901052  | 1 | 1 |
| BTBD19    | NaN     | NaN | NaN | 723748  | 241724  | 0 | 0 | 0 | 0 | 50 | 116 | 39887308 | 1 | 1 |
| BTBD6     | 927925  | 289 | 40  | 1204704 | 369528  | 0 | 0 | 1 | 0 | 50 | 58  | 26260696 | 1 | 1 |
| BTBD      | 433102  | 235 | 32  | 1375228 | 381632  | 0 | 0 | 1 | 0 | 50 | 48  | 19509512 | 1 | 1 |
| C10orf10  | NaN     | NaN | NaN | 515132  | 171592  | 0 | 0 | 1 | 0 | 50 | 117 | 39817176 | 1 | 1 |
| C10orf105 | NaN     | NaN | NaN | 325028  | 108580  | 0 | 0 | 0 | 0 | 50 | 116 | 39754164 | 1 | 1 |
| C10orf107 | 79162   | 310 | -21 | 563548  | 131720  | 0 | 0 | 0 | 0 | 50 | 50  | 18827772 | 1 | 1 |
| C10orf111 | 254900  | 620 | 21  | 387684  | 116412  | 0 | 0 | 0 | 0 | 0  | 0   | 116412   | 1 | 1 |
| C10orf114 | 133573  | 250 | -10 | 326808  | 116412  | 0 | 0 | 0 | 0 | 50 | 60  | 25863756 | 1 | 1 |
| C10orf116 | 401785  | 164 | 45  | 202208  | 53044   | 0 | 0 | 0 | 0 | 50 | 45  | 17084796 | 1 | 1 |
| C10orf118 | 275620  | 477 | 24  | 2378792 | 565684  | 0 | 0 | 0 | 0 | 25 | 32  | 12235720 | 1 | 1 |
| C10orf119 | 516746  | 281 | 42  | 1686016 | 438236  | 0 | 0 | 0 | 0 | 0  | 0   | 438236   | 1 | 1 |
| C10orf120 | 321415  | 530 | 1   | 867216  | 222144  | 0 | 0 | 1 | 0 | 50 | 73  | 23964852 | 1 | 1 |
| C10orf122 | NaN     | NaN | NaN | 482024  | 129940  | 0 | 0 | 0 | 0 | 50 | 116 | 39775524 | 1 | 1 |
| C10orf125 | 386585  | 472 | 13  | 409044  | 122820  | 0 | 0 | 0 | 0 | 50 | 46  | 19712788 | 1 | 1 |
| C10orf129 | 321487  | 512 | 1   | 1245644 | 338200  | 0 | 0 | 0 | 0 | 10 | 10  | 3674988  | 1 | 1 |
| C10orf131 | NaN     | NaN | NaN | 483092  | 109648  | 0 | 0 | 0 | 0 | 50 | 116 | 39755232 | 1 | 1 |
| C10orf137 | 216532  | 351 | -6  | 3151312 | 807764  | 0 | 0 | 0 | 0 | 4  | 3   | 2596308  | 1 | 1 |
| C10orf140 | 128481  | 409 | 22  | 2226780 | 685656  | 0 | 0 | 0 | 0 | 21 | 17  | 9633716  | 1 | 1 |
| C10orf18  | 679964  | 303 | 35  | 6139220 | 1726600 | 0 | 0 | 0 | 0 | 0  | 0   | 1726600  | 1 | 1 |
| C10orf25  | 75634   | 905 | 25  | 310076  | 88288   | 0 | 0 | 0 | 0 | 50 | 52  | 22092648 | 1 | 1 |
| C10orf26  | 883280  | 188 | 44  | 938060  | 274120  | 0 | 0 | 0 | 0 | 50 | 54  | 19097264 | 1 | 1 |
| C10orf27  | 521475  | 579 | 30  | 903528  | 258456  | 0 | 0 | 0 | 0 | 33 | 39  | 13441492 | 1 | 1 |

|          |         |      |     |         |         |   |   |   |   |    |     |          |   |   |
|----------|---------|------|-----|---------|---------|---|---|---|---|----|-----|----------|---|---|
| C10orf28 | 247144  | 581  | 10  | 1991820 | 529728  | 0 | 0 | 0 | 0 | 44 | 45  | 19335784 | 1 | 1 |
| C10orf46 | 597231  | 564  | 19  | 967608  | 252048  | 0 | 0 | 0 | 0 | 12 | 14  | 4828072  | 1 | 1 |
| C10orf47 | 370730  | 134  | 19  | 1046640 | 363120  | 0 | 0 | 0 | 0 | 50 | 46  | 22757656 | 1 | 1 |
| C10orf55 | NaN     | NaN  | NaN | 488788  | 122108  | 0 | 0 | 1 | 0 | 50 | 117 | 39767692 | 1 | 1 |
| C10orf57 | 432591  | 650  | -2  | 324316  | 87932   | 0 | 0 | 0 | 0 | 50 | 73  | 20895776 | 1 | 1 |
| C10orf58 | 340132  | 598  | -7  | 593096  | 165184  | 0 | 0 | 0 | 0 | 50 | 52  | 15550080 | 1 | 1 |
| C10orf68 | 493605  | 708  | -15 | 1701324 | 399432  | 0 | 0 | 0 | 0 | 38 | 37  | 13109344 | 1 | 1 |
| C10orf72 | NaN     | NaN  | NaN | 917768  | 271984  | 0 | 0 | 0 | 0 | 50 | 116 | 39917568 | 1 | 1 |
| C10orf78 | 401935  | 324  | 2   | 652548  | 154860  | 0 | 0 | 0 | 0 | 50 | 73  | 25648020 | 1 | 1 |
| C10orf79 | 379380  | 324  | 16  | 4417248 | 1078680 | 0 | 0 | 0 | 0 | 1  | 0   | 1281244  | 1 | 1 |
| C10orf81 | 261759  | 545  | -4  | 975084  | 239232  | 0 | 0 | 0 | 0 | 2  | 1   | 901036   | 1 | 1 |
| C10orf84 | 179655  | 787  | 4   | 636884  | 142756  | 0 | 0 | 0 | 0 | 50 | 52  | 20318700 | 1 | 1 |
| C10orf91 | 152612  | 271  | -1  | 363476  | 114988  | 0 | 0 | 0 | 0 | 50 | 44  | 20690364 | 1 | 1 |
| C10orf93 | 330124  | 590  | -13 | 1063016 | 274120  | 0 | 0 | 0 | 0 | 50 | 38  | 15628756 | 1 | 1 |
| C10orf95 | 871726  | 178  | 41  | 604488  | 228552  | 0 | 0 | 0 | 0 | 50 | 63  | 21586416 | 1 | 1 |
| C10orf96 | 118426  | 896  | -15 | 725528  | 138484  | 0 | 0 | 0 | 0 | 50 | 65  | 24282048 | 1 | 1 |
| C11orf10 | 1239228 | 212  | 59  | 212532  | 58740   | 0 | 0 | 0 | 0 | 50 | 69  | 25687536 | 1 | 1 |
| C11orf17 | 548433  | 243  | 21  | 539696  | 157708  | 0 | 0 | 0 | 0 | 50 | 57  | 20741984 | 1 | 1 |
| C11orf2  | 3267059 | 207  | 46  | 1919908 | 629408  | 0 | 0 | 0 | 0 | 14 | 9   | 4229992  | 1 | 1 |
| C11orf20 | 1613996 | 257  | 65  | 522608  | 140620  | 0 | 0 | 0 | 0 | 50 | 66  | 21324400 | 1 | 1 |
| C11orf21 | NaN     | NaN  | NaN | 446780  | 145960  | 0 | 0 | 0 | 0 | 50 | 116 | 39791544 | 1 | 1 |
| C11orf34 | NaN     | NaN  | NaN | 536848  | 142400  | 0 | 0 | 0 | 0 | 50 | 116 | 39787984 | 1 | 1 |
| C11orf35 | 1970020 | 236  | 42  | 1580284 | 514064  | 0 | 0 | 0 | 0 | 6  | 5   | 2263092  | 1 | 1 |
| C11orf41 | 826778  | 524  | 19  | 4590620 | 1437172 | 0 | 0 | 0 | 0 | 0  | 0   | 1437172  | 1 | 1 |
| C11orf46 | 28896   | 1021 | -17 | 676756  | 172304  | 0 | 0 | 0 | 0 | 50 | 72  | 21290224 | 1 | 1 |
| C11orf48 | 2425755 | 248  | 51  | 694912  | 178712  | 0 | 0 | 0 | 0 | 50 | 68  | 20007556 | 1 | 1 |
| C11orf51 | 715293  | 267  | 62  | 341048  | 66928   | 0 | 0 | 0 | 0 | 50 | 46  | 18093700 | 1 | 1 |
| C11orf52 | 437513  | 221  | 22  | 327876  | 84372   | 0 | 0 | 0 | 0 | 50 | 49  | 18660452 | 1 | 1 |
| C11orf59 | NaN     | NaN  | NaN | 417944  | 118192  | 0 | 0 | 0 | 0 | 50 | 116 | 39763776 | 1 | 1 |
| C11orf61 | 168652  | 622  | 14  | 1262020 | 380564  | 0 | 0 | 0 | 0 | 20 | 27  | 9447172  | 1 | 1 |
| C11orf66 | 1415260 | 274  | 58  | 1114992 | 305448  | 0 | 0 | 0 | 0 | 47 | 49  | 15868700 | 1 | 1 |
| C11orf67 | 577731  | 361  | 35  | 318264  | 90780   | 0 | 0 | 0 | 0 | 50 | 54  | 24420176 | 1 | 1 |
| C11orf68 | 3779084 | 287  | 42  | 709508  | 238876  | 0 | 0 | 1 | 0 | 1  | 1   | 408332   | 1 | 1 |

|          |         |      |     |          |         |   |   |   |   |    |     |          |   |   |
|----------|---------|------|-----|----------|---------|---|---|---|---|----|-----|----------|---|---|
| C11orf75 | 240034  | 598  | -25 | 149164   | 47348   | 0 | 0 | 0 | 0 | 50 | 100 | 26107260 | 1 | 1 |
| C11orf82 | 307255  | 371  | 0   | 2547892  | 669992  | 0 | 0 | 0 | 0 | 7  | 7   | 4586348  | 1 | 1 |
| C11orf83 | 2425755 | 248  | 51  | 234604   | 72980   | 0 | 0 | 0 | 0 | 50 | 68  | 20007556 | 1 | 1 |
| C11orf86 | NaN     | NaN  | NaN | 287292   | 90780   | 0 | 0 | 0 | 0 | 50 | 116 | 39736364 | 1 | 1 |
| C11orf87 | 32039   | 927  | -12 | 468140   | 166252  | 0 | 0 | 1 | 0 | 50 | 73  | 26064540 | 1 | 1 |
| C11orf9  | 1239228 | 212  | 59  | 2953732  | 878252  | 0 | 0 | 0 | 0 | 1  | 0   | 936992   | 1 | 1 |
| C11orf90 | NaN     | NaN  | NaN | 511572   | 145248  | 0 | 0 | 0 | 0 | 50 | 116 | 39790832 | 1 | 1 |
| C11orf91 | NaN     | NaN  | NaN | 462088   | 163760  | 0 | 0 | 0 | 0 | 50 | 116 | 39809344 | 1 | 1 |
| C11orf92 | 209532  | 617  | 16  | 309364   | 91136   | 0 | 0 | 0 | 0 | 50 | 58  | 22491012 | 1 | 1 |
| C11orf93 | NaN     | NaN  | NaN | 393024   | 107868  | 0 | 0 | 0 | 0 | 50 | 116 | 39753452 | 1 | 1 |
| C11orf94 | 427820  | 291  | 48  | 243860   | 86152   | 0 | 0 | 0 | 0 | 50 | 52  | 20813896 | 1 | 1 |
| C11orf95 | NaN     | NaN  | NaN | 1643652  | 551088  | 0 | 0 | 0 | 0 | 9  | 16  | 4908528  | 1 | 1 |
| C12orf11 | 409433  | 327  | 21  | 1864016  | 469564  | 0 | 0 | 0 | 0 | 20 | 16  | 8845888  | 1 | 1 |
| C12orf12 | 20238   | 574  | -33 | 1024568  | 279460  | 0 | 0 | 0 | 0 | 50 | 96  | 21164912 | 1 | 1 |
| C12orf23 | 156112  | 473  | 21  | 292632   | 90780   | 0 | 0 | 0 | 0 | 50 | 46  | 19326884 | 1 | 1 |
| C12orf24 | 922262  | 206  | 43  | 720900   | 182628  | 0 | 0 | 0 | 0 | 36 | 42  | 16644780 | 1 | 1 |
| C12orf26 | 54295   | 1263 | -20 | 1570316  | 414028  | 0 | 0 | 0 | 0 | 19 | 14  | 7483476  | 1 | 1 |
| C12orf34 | 786670  | 423  | 45  | 1081528  | 378428  | 0 | 0 | 0 | 0 | 50 | 71  | 23130032 | 1 | 1 |
| C12orf35 | 230869  | 442  | 27  | 4439320  | 1174088 | 0 | 0 | 0 | 0 | 1  | 0   | 1503032  | 1 | 1 |
| C12orf36 | 548501  | 509  | 5   | 353864   | 100036  | 0 | 0 | 0 | 0 | 50 | 64  | 21640172 | 1 | 1 |
| C12orf39 | 518837  | 836  | -23 | 313280   | 85084   | 0 | 0 | 0 | 0 | 50 | 62  | 16740900 | 1 | 1 |
| C12orf41 | 1696008 | 421  | 21  | 1270208  | 347812  | 0 | 0 | 0 | 0 | 1  | 2   | 684944   | 1 | 1 |
| C12orf44 | 468067  | 234  | 41  | 548952   | 161268  | 0 | 0 | 0 | 0 | 50 | 28  | 16136768 | 1 | 1 |
| C12orf48 | 229712  | 552  | 12  | 1300468  | 336776  | 0 | 0 | 0 | 0 | 50 | 54  | 22837756 | 1 | 1 |
| C12orf51 | 704098  | 239  | 40  | 10758320 | 3160924 | 0 | 0 | 0 | 0 | 1  | 0   | 3383780  | 1 | 1 |
| C12orf52 | 417427  | 252  | 35  | 646852   | 226772  | 0 | 0 | 0 | 0 | 50 | 52  | 19240376 | 1 | 1 |
| C12orf53 | 2816186 | 232  | 48  | 682808   | 245284  | 0 | 0 | 0 | 0 | 6  | 24  | 6345344  | 1 | 1 |
| C12orf59 | 397577  | 398  | 18  | 412248   | 126024  | 0 | 0 | 0 | 0 | 50 | 59  | 21415536 | 1 | 1 |
| C12orf61 | 299026  | 359  | 3   | 306516   | 118548  | 0 | 0 | 0 | 0 | 50 | 56  | 22855556 | 1 | 1 |
| C12orf62 | 1040456 | 192  | 58  | 149520   | 40584   | 0 | 0 | 0 | 0 | 50 | 72  | 21686808 | 1 | 1 |
| C12orf63 | 152762  | 629  | -4  | 3128884  | 822716  | 0 | 0 | 0 | 0 | 15 | 10  | 7298712  | 1 | 1 |
| C12orf64 | 127493  | 587  | -16 | 6267380  | 1491640 | 0 | 0 | 0 | 0 | 1  | 0   | 1590964  | 1 | 1 |
| C12orf68 | 511392  | 352  | 32  | 478108   | 146672  | 0 | 0 | 0 | 0 | 50 | 55  | 18729516 | 1 | 1 |



|           |         |     |     |         |        |   |   |   |   |    |     |          |   |   |
|-----------|---------|-----|-----|---------|--------|---|---|---|---|----|-----|----------|---|---|
| C12orf69  | 340728  | 578 | -4  | 567108  | 161268 | 0 | 0 | 0 | 0 | 50 | 47  | 15743388 | 1 | 1 |
| C12orf70  | NaN     | NaN | NaN | 912072  | 226416 | 0 | 0 | 0 | 0 | 50 | 116 | 39872000 | 1 | 1 |
| C12orf72  | 313930  | 228 | 11  | 669992  | 181204 | 0 | 0 | 0 | 0 | 50 | 58  | 20419804 | 1 | 1 |
| C12orf73  | NaN     | NaN | NaN | 186544  | 52688  | 0 | 0 | 0 | 0 | 50 | 116 | 39698272 | 1 | 1 |
| C12orf74  | 208773  | 509 | -1  | 477040  | 153080 | 0 | 0 | 1 | 0 | 29 | 28  | 8042396  | 1 | 1 |
| C12orf75  | NaN     | NaN | NaN | 180492  | 45924  | 0 | 0 | 0 | 0 | 50 | 116 | 39691508 | 1 | 1 |
| C12orf76  | 1009535 | 193 | 57  | 356356  | 92204  | 0 | 0 | 0 | 0 | 50 | 72  | 20505600 | 1 | 1 |
| C12orf77  | 251399  | 819 | 7   | 373800  | 106800 | 0 | 0 | 0 | 0 | 50 | 54  | 18499184 | 1 | 1 |
| C13orf1   | 342767  | 321 | 50  | 518336  | 129940 | 0 | 0 | 0 | 0 | 50 | 56  | 19537280 | 1 | 1 |
| C13orf15  | 264598  | 508 | 43  | 364188  | 95052  | 0 | 0 | 0 | 0 | 50 | 63  | 18833112 | 1 | 1 |
| C13orf16  | 335348  | 633 | 41  | 406552  | 101816 | 0 | 0 | 0 | 0 | 50 | 63  | 17209040 | 1 | 1 |
| C13orf18  | 383104  | 791 | 50  | 1715208 | 460308 | 0 | 0 | 0 | 0 | 40 | 33  | 13426896 | 1 | 1 |
| C13orf23  | 165959  | 998 | 5   | 2276264 | 802780 | 0 | 0 | 0 | 0 | 5  | 2   | 2034540  | 1 | 1 |
| C13orf26  | 362646  | 555 | 39  | 770384  | 186544 | 0 | 0 | 0 | 0 | 50 | 51  | 20112576 | 1 | 1 |
| C13orf27  | 195534  | 475 | 24  | 600216  | 151656 | 0 | 0 | 0 | 0 | 50 | 40  | 16969452 | 1 | 1 |
| C13orf28  | 191446  | 610 | -22 | 527948  | 127804 | 0 | 0 | 0 | 0 | 50 | 87  | 26475364 | 1 | 1 |
| C13orf30  | 175913  | 538 | 37  | 359204  | 102172 | 0 | 0 | 0 | 0 | 50 | 57  | 17926380 | 1 | 1 |
| C13orf31  | 139965  | 346 | 45  | 1110720 | 294768 | 0 | 0 | 0 | 0 | 22 | 27  | 8854788  | 1 | 1 |
| C13orf33  | 369916  | 547 | 59  | 775368  | 215736 | 0 | 0 | 0 | 0 | 26 | 23  | 5589200  | 1 | 1 |
| C13orf34  | 257535  | 685 | 2   | 1470992 | 370240 | 0 | 0 | 0 | 0 | 2  | 2   | 1219656  | 1 | 1 |
| C13orf35  | 572556  | 389 | 44  | 302600  | 92560  | 0 | 0 | 0 | 0 | 50 | 51  | 21299124 | 1 | 1 |
| C13orf36  | 194859  | 868 | -12 | 259880  | 86152  | 0 | 0 | 0 | 0 | 50 | 72  | 27083056 | 1 | 1 |
| C13orf37  | 257353  | 685 | -9  | 211464  | 63012  | 0 | 0 | 0 | 0 | 50 | 51  | 23339360 | 1 | 1 |
| C13orf38  | NaN     | NaN | NaN | 735140  | 179068 | 0 | 0 | 0 | 0 | 50 | 116 | 39824652 | 1 | 1 |
| C13orf39  | 195502  | 521 | 34  | 677824  | 186188 | 0 | 0 | 0 | 0 | 50 | 58  | 20187692 | 1 | 1 |
| C14orf1   | 639204  | 372 | 46  | 363120  | 105732 | 0 | 0 | 0 | 0 | 50 | 44  | 21978016 | 1 | 1 |
| C14orf101 | 137131  | 961 | 2   | 1826636 | 505876 | 0 | 0 | 0 | 0 | 2  | 2   | 1337848  | 1 | 1 |
| C14orf102 | 318736  | 622 | 14  | 2997876 | 792456 | 0 | 0 | 0 | 0 | 4  | 1   | 1567112  | 1 | 1 |
| C14orf104 | 587903  | 318 | 10  | 2050560 | 645072 | 0 | 0 | 0 | 0 | 15 | 10  | 7515872  | 1 | 1 |
| C14orf106 | 234595  | 448 | 8   | 2974024 | 724460 | 0 | 0 | 0 | 0 | 3  | 2   | 1812396  | 1 | 1 |
| C14orf109 | 325787  | 222 | 35  | 429336  | 119616 | 0 | 0 | 0 | 0 | 50 | 47  | 17896832 | 1 | 1 |
| C14orf115 | 604423  | 384 | 45  | 1695984 | 559632 | 0 | 0 | 0 | 0 | 34 | 33  | 15742320 | 1 | 1 |
| C14orf118 | 251674  | 586 | 36  | 1282312 | 350660 | 0 | 0 | 0 | 0 | 11 | 4   | 4756516  | 1 | 1 |

|            |         |     |     |         |        |   |   |   |   |    |     |          |   |   |
|------------|---------|-----|-----|---------|--------|---|---|---|---|----|-----|----------|---|---|
| C14orf119  | 1261207 | 185 | 41  | 351728  | 103240 | 0 | 0 | 0 | 0 | 50 | 68  | 21572888 | 1 | 1 |
| C14orf126  | 408399  | 362 | 20  | 429336  | 122820 | 0 | 0 | 0 | 0 | 50 | 57  | 23476776 | 1 | 1 |
| C14orf129  | 328104  | 560 | 12  | 360272  | 95764  | 0 | 0 | 0 | 0 | 50 | 59  | 21341488 | 1 | 1 |
| C14orf135  | 296496  | 516 | 2   | 2390540 | 656464 | 0 | 0 | 0 | 0 | 0  | 0   | 656464   | 1 | 1 |
| C14orf138  | 747266  | 166 | 51  | 595232  | 165184 | 0 | 0 | 0 | 0 | 50 | 69  | 18038164 | 1 | 1 |
| C14orf142  | 325787  | 222 | 35  | 260236  | 71912  | 0 | 0 | 2 | 0 | 1  | 2   | 191528   | 1 | 1 |
| C14orf143  | 297843  | 598 | 3   | 442864  | 106088 | 0 | 0 | 0 | 0 | 50 | 65  | 23251428 | 1 | 1 |
| C14orf145  | 127660  | 629 | -21 | 2893568 | 713068 | 0 | 0 | 0 | 0 | 2  | 2   | 1967256  | 1 | 1 |
| C14orf147  | 517820  | 249 | 16  | 187968  | 49128  | 0 | 0 | 0 | 0 | 50 | 55  | 21660108 | 1 | 1 |
| C14orf148  | 551151  | 418 | 50  | 970812  | 275544 | 0 | 0 | 0 | 0 | 2  | 1   | 962980   | 1 | 1 |
| C14orf149  | 168237  | 606 | 12  | 878964  | 277680 | 0 | 0 | 0 | 0 | 4  | 3   | 1691356  | 1 | 1 |
| C14orf153  | 867608  | 225 | 39  | 549664  | 131720 | 0 | 0 | 0 | 0 | 50 | 63  | 19588900 | 1 | 1 |
| C14orf156  | 455772  | 384 | 47  | 297260  | 76540  | 0 | 0 | 0 | 0 | 50 | 62  | 21471784 | 1 | 1 |
| C14orf166E | 357783  | 370 | 41  | 1288364 | 333928 | 0 | 0 | 0 | 0 | 23 | 14  | 10174124 | 1 | 1 |
| C14orf174  | 551151  | 418 | 50  | 1718412 | 452832 | 0 | 0 | 0 | 0 | 2  | 1   | 962980   | 1 | 1 |
| C14orf176  | NaN     | NaN | NaN | 551800  | 172304 | 0 | 0 | 0 | 0 | 50 | 116 | 39817888 | 1 | 1 |
| C14orf178  | 429207  | 388 | 37  | 327164  | 89356  | 0 | 0 | 0 | 0 | 50 | 72  | 23377808 | 1 | 1 |
| C14orf179  | 227740  | 582 | 35  | 645072  | 166608 | 0 | 0 | 0 | 0 | 50 | 44  | 20816744 | 1 | 1 |
| C14orf180  | 625253  | 450 | 20  | 393380  | 139552 | 0 | 0 | 0 | 0 | 50 | 62  | 21152808 | 1 | 1 |
| C14orf181  | 543449  | 259 | 46  | 384836  | 150232 | 0 | 0 | 0 | 0 | 22 | 18  | 8559664  | 1 | 1 |
| C14orf182  | 689076  | 154 | 46  | 283732  | 75116  | 0 | 0 | 0 | 0 | 50 | 47  | 16670056 | 1 | 1 |
| C14orf183  | 747266  | 166 | 51  | 822360  | 234960 | 0 | 0 | 1 | 0 | 50 | 69  | 18038164 | 1 | 1 |
| C14orf184  | 396915  | 483 | 32  | 346744  | 130652 | 0 | 0 | 0 | 0 | 50 | 36  | 15818860 | 1 | 1 |
| C14orf21   | 915114  | 220 | 38  | 1575300 | 510504 | 0 | 0 | 0 | 0 | 35 | 38  | 14278804 | 1 | 1 |
| C14orf38   | NaN     | NaN | NaN | 2135644 | 493772 | 0 | 0 | 0 | 0 | 50 | 116 | 40139356 | 1 | 1 |
| C14orf4    | 429724  | 206 | 52  | 1902820 | 650768 | 0 | 0 | 0 | 0 | 6  | 8   | 2885024  | 1 | 1 |
| C14orf43   | 535648  | 191 | 50  | 2585628 | 808476 | 0 | 0 | 0 | 0 | 1  | 1   | 1037028  | 1 | 1 |
| C14orf45   | 469337  | 158 | 45  | 1418660 | 326452 | 0 | 0 | 0 | 0 | 50 | 45  | 16890776 | 1 | 1 |
| C14orf49   | 202508  | 475 | 32  | 2466724 | 730868 | 0 | 0 | 0 | 0 | 0  | 0   | 730868   | 1 | 1 |
| C14orf50   | 662511  | 188 | 36  | 1129232 | 277324 | 0 | 0 | 0 | 0 | 50 | 58  | 22626648 | 1 | 1 |
| C14orf68   | 412002  | 237 | 37  | 758280  | 255252 | 0 | 0 | 0 | 0 | 50 | 44  | 19346464 | 1 | 1 |
| C14orf73   | 956863  | 211 | 36  | 1778576 | 582772 | 0 | 0 | 0 | 0 | 0  | 0   | 582772   | 1 | 1 |
| C14orf80   | 689089  | 298 | 41  | 1059100 | 366680 | 0 | 0 | 0 | 0 | 36 | 23  | 13861928 | 1 | 1 |

|          |         |      |     |         |         |   |   |   |   |    |     |          |   |   |
|----------|---------|------|-----|---------|---------|---|---|---|---|----|-----|----------|---|---|
| C15orf17 | 764533  | 195  | 46  | 496264  | 158420  | 0 | 0 | 0 | 0 | 50 | 66  | 21528032 | 1 | 1 |
| C15orf2  | 179638  | 1121 | -44 | 2763628 | 943400  | 0 | 0 | 0 | 0 | 3  | 2   | 2005348  | 1 | 1 |
| C15orf23 | 872646  | 184  | 42  | 874336  | 219296  | 0 | 0 | 0 | 0 | 50 | 55  | 20353232 | 1 | 1 |
| C15orf24 | 409752  | 384  | 1   | 615880  | 181916  | 0 | 0 | 0 | 0 | 50 | 53  | 19269924 | 1 | 1 |
| C15orf29 | 431919  | 242  | 7   | 820224  | 195444  | 0 | 0 | 0 | 0 | 50 | 78  | 24326904 | 1 | 1 |
| C15orf32 | 288049  | 578  | -30 | 461020  | 121040  | 0 | 0 | 0 | 0 | 50 | 109 | 25194476 | 1 | 1 |
| C15orf33 | 239848  | 385  | -11 | 1381992 | 312924  | 0 | 0 | 0 | 0 | 50 | 40  | 19775088 | 1 | 1 |
| C15orf38 | 969942  | 239  | 29  | 582416  | 166252  | 0 | 0 | 0 | 0 | 50 | 61  | 20193032 | 1 | 1 |
| C15orf42 | 804572  | 319  | 27  | 4787844 | 1424712 | 0 | 0 | 0 | 0 | 1  | 0   | 2468860  | 1 | 1 |
| C15orf44 | 552209  | 185  | 35  | 1343188 | 366680  | 0 | 0 | 0 | 0 | 21 | 21  | 7694228  | 1 | 1 |
| C15orf48 | 214586  | 299  | 16  | 229620  | 56604   | 0 | 0 | 0 | 0 | 50 | 37  | 17513064 | 1 | 1 |
| C15orf54 | 251181  | 384  | -14 | 462444  | 127092  | 0 | 0 | 0 | 0 | 50 | 31  | 18047420 | 1 | 1 |
| C15orf55 | 542657  | 234  | 22  | 2774308 | 881456  | 0 | 0 | 0 | 0 | 5  | 3   | 2162700  | 1 | 1 |
| C15orf56 | NaN     | NaN  | NaN | 380208  | 145248  | 0 | 0 | 0 | 0 | 50 | 116 | 39790832 | 1 | 1 |
| C15orf58 | 876945  | 154  | 52  | 930228  | 312924  | 0 | 0 | 0 | 0 | 20 | 41  | 10581388 | 1 | 1 |
| C15orf60 | 294157  | 472  | 16  | 684232  | 199004  | 0 | 0 | 0 | 0 | 50 | 57  | 20981216 | 1 | 1 |
| C15orf61 | NaN     | NaN  | NaN | 392312  | 120328  | 0 | 0 | 0 | 0 | 50 | 116 | 39765912 | 1 | 1 |
| C15orf62 | NaN     | NaN  | NaN | 421148  | 142756  | 0 | 0 | 0 | 0 | 50 | 116 | 39788340 | 1 | 1 |
| C15orf63 | 784327  | 286  | 37  | 337488  | 91848   | 0 | 0 | 0 | 0 | 50 | 69  | 23862324 | 1 | 1 |
| C16orf11 | 1115707 | 213  | 39  | 1341408 | 499824  | 0 | 0 | 0 | 0 | 4  | 2   | 1457108  | 1 | 1 |
| C16orf13 | 1115707 | 213  | 39  | 623712  | 134568  | 0 | 0 | 0 | 0 | 50 | 53  | 16969808 | 1 | 1 |
| C16orf3  | NaN     | NaN  | NaN | 286224  | 93984   | 0 | 0 | 0 | 0 | 50 | 116 | 39739568 | 1 | 1 |
| C16orf42 | 1181253 | 215  | 38  | 784980  | 243504  | 0 | 0 | 0 | 0 | 50 | 49  | 18614528 | 1 | 1 |
| C16orf48 | 1111484 | 129  | 46  | 861520  | 275900  | 0 | 0 | 0 | 0 | 31 | 22  | 11565016 | 1 | 1 |
| C16orf5  | 751633  | 160  | 39  | 526524  | 160200  | 0 | 0 | 0 | 0 | 50 | 50  | 17444712 | 1 | 1 |
| C16orf52 | NaN     | NaN  | NaN | 416520  | 130296  | 0 | 0 | 0 | 0 | 50 | 116 | 39775880 | 1 | 1 |
| C16orf53 | NaN     | NaN  | NaN | 631544  | 194020  | 0 | 0 | 0 | 0 | 50 | 116 | 39839604 | 1 | 1 |
| C16orf54 | NaN     | NaN  | NaN | 532932  | 190104  | 0 | 0 | 0 | 0 | 50 | 116 | 39835688 | 1 | 1 |
| C16orf55 | 1090549 | 219  | 38  | 360628  | 98612   | 0 | 0 | 0 | 0 | 50 | 51  | 16551864 | 1 | 1 |
| C16orf57 | 856192  | 158  | 9   | 689572  | 190460  | 0 | 0 | 0 | 0 | 50 | 56  | 19314424 | 1 | 1 |
| C16orf61 | 231500  | 284  | 4   | 222144  | 46992   | 0 | 0 | 0 | 0 | 50 | 47  | 21594604 | 1 | 1 |
| C16orf63 | 411695  | 191  | 34  | 459952  | 119972  | 0 | 0 | 0 | 0 | 50 | 57  | 21453628 | 1 | 1 |
| C16orf68 | 403747  | 542  | -11 | 1039520 | 298684  | 0 | 0 | 0 | 0 | 38 | 49  | 15187316 | 1 | 1 |

|           |         |     |     |         |        |   |   |   |   |    |     |          |   |   |
|-----------|---------|-----|-----|---------|--------|---|---|---|---|----|-----|----------|---|---|
| C16orf7   | 1090549 | 219 | 38  | 1580640 | 504096 | 0 | 0 | 0 | 0 | 1  | 0   | 602708   | 1 | 1 |
| C16orf73  | 1685537 | 214 | 37  | 1253476 | 314348 | 0 | 0 | 0 | 0 | 12 | 18  | 6034912  | 1 | 1 |
| C16orf74  | 390985  | 250 | 38  | 210396  | 49128  | 0 | 0 | 0 | 0 | 50 | 44  | 18864440 | 1 | 1 |
| C16orf75  | 663123  | 342 | 28  | 359560  | 121040 | 0 | 0 | 0 | 0 | 9  | 7   | 4896068  | 1 | 1 |
| C16orf79  | 2179404 | 224 | 39  | 573516  | 181560 | 0 | 0 | 0 | 0 | 50 | 46  | 19527312 | 1 | 1 |
| C16orf80  | 898142  | 292 | 14  | 507656  | 135280 | 0 | 0 | 0 | 0 | 50 | 60  | 19167396 | 1 | 1 |
| C16orf82  | 202160  | 672 | -9  | 384480  | 114276 | 0 | 0 | 0 | 0 | 50 | 78  | 30843128 | 1 | 1 |
| C16orf88  | 320648  | 639 | 18  | 1178004 | 309720 | 0 | 0 | 0 | 0 | 50 | 55  | 26101564 | 1 | 1 |
| C16orf91  | 1211641 | 215 | 40  | 881456  | 277324 | 0 | 0 | 1 | 0 | 50 | 64  | 21318348 | 1 | 1 |
| C17orf100 | 663953  | 424 | 9   | 269848  | 108224 | 0 | 0 | 0 | 0 | 50 | 52  | 18304452 | 1 | 1 |
| C17orf101 | 2598845 | 179 | 36  | 971524  | 281240 | 0 | 0 | 0 | 0 | 50 | 59  | 20440452 | 1 | 1 |
| C17orf102 | 222789  | 740 | -3  | 406908  | 137772 | 0 | 0 | 0 | 0 | 50 | 58  | 22213332 | 1 | 1 |
| C17orf103 | 416965  | 517 | -27 | 185120  | 62656  | 0 | 0 | 0 | 0 | 50 | 71  | 19737708 | 1 | 1 |
| C17orf105 | NaN     | NaN | NaN | 445000  | 105020 | 0 | 0 | 0 | 0 | 50 | 116 | 39750604 | 1 | 1 |
| C17orf106 | NaN     | NaN | NaN | 317196  | 89712  | 0 | 0 | 0 | 0 | 50 | 116 | 39735296 | 1 | 1 |
| C17orf107 | NaN     | NaN | NaN | 457816  | 162692 | 0 | 0 | 0 | 0 | 50 | 116 | 39808276 | 1 | 1 |
| C17orf108 | 632198  | 535 | -24 | 213600  | 52332  | 0 | 0 | 0 | 0 | 50 | 55  | 19046712 | 1 | 1 |
| C17orf28  | 1045089 | 223 | 25  | 2009620 | 595232 | 0 | 0 | 0 | 0 | 0  | 0   | 595232   | 1 | 1 |
| C17orf37  | 1284992 | 226 | 38  | 301176  | 85440  | 0 | 0 | 0 | 0 | 50 | 64  | 21003644 | 1 | 1 |
| C17orf39  | 886959  | 193 | 17  | 756500  | 229264 | 0 | 0 | 0 | 0 | 50 | 52  | 20036748 | 1 | 1 |
| C17orf42  | 594135  | 209 | 20  | 920972  | 250624 | 0 | 0 | 0 | 0 | 50 | 57  | 19186976 | 1 | 1 |
| C17orf46  | 789809  | 207 | 23  | 976152  | 278748 | 0 | 0 | 0 | 0 | 32 | 34  | 14564672 | 1 | 1 |
| C17orf48  | 59041   | 801 | -49 | 892492  | 219296 | 0 | 0 | 0 | 0 | 11 | 10  | 4812052  | 1 | 1 |
| C17orf49  | 1696302 | 360 | 24  | 492348  | 147384 | 0 | 0 | 0 | 0 | 50 | 49  | 16256384 | 1 | 1 |
| C17orf51  | NaN     | NaN | NaN | 540408  | 175152 | 0 | 0 | 0 | 0 | 50 | 116 | 39820736 | 1 | 1 |
| C17orf55  | 2679984 | 197 | 27  | 636528  | 216804 | 0 | 0 | 0 | 0 | 50 | 50  | 22269224 | 1 | 1 |
| C17orf56  | 2679984 | 197 | 27  | 1315064 | 419368 | 0 | 0 | 0 | 0 | 11 | 12  | 5322556  | 1 | 1 |
| C17orf57  | 1135425 | 196 | 23  | 2611972 | 602708 | 0 | 0 | 0 | 0 | 0  | 0   | 602708   | 1 | 1 |
| C17orf58  | 854444  | 293 | -12 | 357068  | 101104 | 0 | 0 | 0 | 0 | 50 | 70  | 19156004 | 1 | 1 |
| C17orf60  | 1306314 | 184 | 23  | 246352  | 58028  | 0 | 0 | 0 | 0 | 50 | 75  | 23771544 | 1 | 1 |
| C17orf61  | 1906324 | 206 | 33  | 292988  | 89356  | 0 | 0 | 0 | 0 | 50 | 87  | 23542992 | 1 | 1 |
| C17orf63  | 1694459 | 152 | 36  | 72980   | 21004  | 0 | 0 | 0 | 0 | 13 | 23  | 6206504  | 1 | 1 |
| C17orf65  | 930750  | 175 | 41  | 602708  | 18868  | 0 | 0 | 0 | 0 | 50 | 69  | 21793252 | 1 | 1 |

|          |         |      |     |         |        |   |   |   |   |    |     |          |   |   |
|----------|---------|------|-----|---------|--------|---|---|---|---|----|-----|----------|---|---|
| C17orf66 | 620019  | 235  | 8   | 1496268 | 393024 | 0 | 0 | 0 | 0 | 43 | 53  | 21666160 | 1 | 1 |
| C17orf68 | 870950  | 218  | 18  | 3039884 | 958708 | 0 | 0 | 0 | 0 | 11 | 8   | 5694932  | 1 | 1 |
| C17orf71 | 834161  | 507  | 4   | 2468860 | 724460 | 0 | 0 | 0 | 0 | 0  | 0   | 724460   | 1 | 1 |
| C17orf72 | NaN     | NaN  | NaN | 485228  | 147028 | 0 | 0 | 0 | 0 | 50 | 116 | 39792612 | 1 | 1 |
| C17orf76 | 829707  | 254  | 8   | 906376  | 211820 | 0 | 0 | 0 | 0 | 50 | 75  | 21935652 | 1 | 1 |
| C17orf77 | 698491  | 504  | 10  | 605200  | 180848 | 0 | 0 | 0 | 0 | 50 | 63  | 19807128 | 1 | 1 |
| C17orf78 | 498943  | 171  | 21  | 716272  | 195800 | 0 | 0 | 0 | 0 | 50 | 63  | 21901120 | 1 | 1 |
| C17orf79 | 668593  | 374  | 12  | 480600  | 124956 | 0 | 0 | 0 | 0 | 50 | 47  | 18123960 | 1 | 1 |
| C17orf81 | 1782958 | 316  | 21  | 901036  | 258812 | 0 | 0 | 0 | 0 | 39 | 39  | 14081580 | 1 | 1 |
| C17orf82 | 292199  | 414  | -9  | 583128  | 224280 | 0 | 0 | 0 | 0 | 47 | 39  | 21536932 | 1 | 1 |
| C17orf87 | 1279084 | 384  | 24  | 390888  | 96120  | 0 | 0 | 0 | 0 | 50 | 70  | 19173092 | 1 | 1 |
| C17orf89 | 2679984 | 197  | 27  | 189748  | 61232  | 0 | 0 | 0 | 0 | 50 | 50  | 22269224 | 1 | 1 |
| C17orf90 | 3745109 | 205  | 30  | 363476  | 117124 | 0 | 0 | 0 | 0 | 33 | 25  | 10695308 | 1 | 1 |
| C17orf95 | 827288  | 206  | 22  | 494840  | 134212 | 0 | 0 | 0 | 0 | 50 | 41  | 14517680 | 1 | 1 |
| C17orf96 | NaN     | NaN  | NaN | 877896  | 339624 | 0 | 0 | 0 | 0 | 50 | 116 | 39985208 | 1 | 1 |
| C17orf97 | 248876  | 591  | 1   | 242436  | 86508  | 0 | 0 | 0 | 0 | 50 | 51  | 18116484 | 1 | 1 |
| C17orf98 | 1198833 | 207  | 37  | 395516  | 111784 | 0 | 0 | 0 | 0 | 50 | 46  | 18180920 | 1 | 1 |
| C17orf99 | NaN     | NaN  | NaN | 678180  | 193308 | 0 | 0 | 0 | 0 | 50 | 116 | 39838892 | 1 | 1 |
| C18orf1  | 247407  | 688  | 28  | 850128  | 232824 | 0 | 0 | 0 | 0 | 50 | 50  | 21301616 | 1 | 1 |
| C18orf10 | 174235  | 834  | 53  | 779640  | 210396 | 0 | 0 | 0 | 0 | 50 | 45  | 16618792 | 1 | 1 |
| C18orf19 | 161398  | 676  | 44  | 688860  | 198648 | 0 | 0 | 0 | 0 | 36 | 36  | 12650104 | 1 | 1 |
| C18orf22 | 438786  | 506  | 20  | 931296  | 196512 | 0 | 0 | 0 | 0 | 50 | 57  | 23157088 | 1 | 1 |
| C18orf26 | 152164  | 427  | 5   | 531508  | 155216 | 0 | 0 | 0 | 0 | 50 | 41  | 18377788 | 1 | 1 |
| C18orf34 | 13428   | 1050 | -27 | 2343904 | 526880 | 0 | 0 | 0 | 0 | 2  | 0   | 960488   | 1 | 1 |
| C18orf45 | 299157  | 244  | 65  | 797796  | 213600 | 0 | 0 | 0 | 0 | 40 | 60  | 20352520 | 1 | 1 |
| C18orf55 | 150380  | 981  | 4   | 642224  | 176932 | 0 | 0 | 0 | 0 | 50 | 60  | 19204420 | 1 | 1 |
| C18orf56 | NaN     | NaN  | NaN | 389108  | 119260 | 0 | 0 | 0 | 0 | 50 | 116 | 39764844 | 1 | 1 |
| C18orf62 | 63196   | 1063 | -18 | 266288  | 71200  | 0 | 0 | 0 | 0 | 50 | 59  | 18488148 | 1 | 1 |
| C19orf10 | 921603  | 203  | 35  | 452832  | 128160 | 0 | 0 | 0 | 0 | 50 | 61  | 21420164 | 1 | 1 |
| C19orf2  | 163583  | 776  | -30 | 1404776 | 357424 | 0 | 0 | 0 | 0 | 50 | 89  | 22589268 | 1 | 1 |
| C19orf20 | NaN     | NaN  | NaN | 688504  | 250268 | 0 | 0 | 0 | 0 | 50 | 116 | 39895852 | 1 | 1 |
| C19orf21 | 1914670 | 200  | 23  | 1662164 | 533644 | 0 | 0 | 0 | 0 | 14 | 20  | 6799600  | 1 | 1 |
| C19orf22 | 2230583 | 191  | 36  | 684232  | 209684 | 0 | 0 | 0 | 0 | 50 | 56  | 24250720 | 1 | 1 |

|          |         |     |     |         |        |   |   |   |   |    |     |          |   |   |
|----------|---------|-----|-----|---------|--------|---|---|---|---|----|-----|----------|---|---|
| C19orf24 | NaN     | NaN | NaN | 320044  | 117836 | 0 | 0 | 0 | 0 | 50 | 116 | 39763420 | 1 | 1 |
| C19orf25 | 2352825 | 221 | 38  | 294412  | 95408  | 0 | 0 | 1 | 0 | 18 | 20  | 6511952  | 1 | 1 |
| C19orf28 | 2160126 | 269 | 39  | 1358496 | 442152 | 0 | 0 | 0 | 0 | 50 | 60  | 21798948 | 1 | 1 |
| C19orf29 | 2167983 | 269 | 31  | 1926672 | 550020 | 0 | 0 | 0 | 0 | 14 | 11  | 6637264  | 1 | 1 |
| C19orf33 | NaN     | NaN | NaN | 286580  | 73336  | 0 | 0 | 0 | 0 | 50 | 116 | 39718920 | 1 | 1 |
| C19orf36 | 1853815 | 239 | 37  | 632256  | 154860 | 0 | 0 | 0 | 0 | 50 | 68  | 23613124 | 1 | 1 |
| C19orf38 | NaN     | NaN | NaN | 594164  | 173728 | 0 | 0 | 0 | 0 | 50 | 116 | 39819312 | 1 | 1 |
| C19orf39 | 1385739 | 197 | 31  | 547528  | 195800 | 0 | 0 | 0 | 0 | 50 | 60  | 22230420 | 1 | 1 |
| C19orf41 | 1458117 | 445 | 27  | 578144  | 163048 | 0 | 0 | 0 | 0 | 50 | 69  | 17838092 | 1 | 1 |
| C19orf42 | 980514  | 362 | 41  | 215736  | 46992  | 0 | 0 | 0 | 0 | 50 | 85  | 21686096 | 1 | 1 |
| C19orf46 | 984653  | 303 | 21  | 999648  | 330012 | 0 | 0 | 0 | 0 | 19 | 27  | 9494164  | 1 | 1 |
| C19orf47 | 1006719 | 289 | 35  | 892136  | 278392 | 0 | 0 | 2 | 0 | 20 | 41  | 9222180  | 1 | 1 |
| C19orf48 | 655673  | 589 | 25  | 282664  | 95408  | 0 | 0 | 0 | 0 | 50 | 77  | 24644100 | 1 | 1 |
| C19orf50 | 1394856 | 259 | 48  | 457104  | 127092 | 0 | 0 | 0 | 0 | 50 | 73  | 26137876 | 1 | 1 |
| C19orf51 | 1036976 | 266 | -1  | 1463160 | 473124 | 0 | 0 | 0 | 0 | 1  | 2   | 1100396  | 1 | 1 |
| C19orf55 | 1151198 | 321 | 30  | 1060168 | 349592 | 0 | 0 | 0 | 0 | 14 | 10  | 6958732  | 1 | 1 |
| C19orf56 | NaN     | NaN | NaN | 295124  | 69064  | 0 | 0 | 0 | 0 | 50 | 116 | 39714648 | 1 | 1 |
| C19orf59 | 688482  | 384 | 31  | 510504  | 119616 | 0 | 0 | 0 | 0 | 50 | 67  | 22649432 | 1 | 1 |
| C19orf6  | 2387949 | 206 | 26  | 1554296 | 478108 | 0 | 0 | 0 | 0 | 50 | 78  | 32398136 | 1 | 1 |
| C19orf60 | 1395948 | 185 | 41  | 502672  | 161624 | 0 | 0 | 0 | 0 | 50 | 75  | 28293812 | 1 | 1 |
| C19orf61 | 452493  | 192 | -2  | 1338916 | 385904 | 0 | 0 | 0 | 0 | 50 | 48  | 20632336 | 1 | 1 |
| C19orf62 | 865138  | 212 | 38  | 864012  | 231756 | 0 | 0 | 0 | 0 | 50 | 59  | 18864796 | 1 | 1 |
| C19orf63 | 1038277 | 491 | 30  | 722324  | 247420 | 0 | 0 | 0 | 0 | 50 | 64  | 20883672 | 1 | 1 |
| C19orf66 | 1615603 | 272 | 8   | 759348  | 208260 | 0 | 0 | 0 | 0 | 15 | 15  | 6218964  | 1 | 1 |
| C19orf69 | NaN     | NaN | NaN | 327520  | 98612  | 0 | 0 | 0 | 0 | 50 | 116 | 39744196 | 1 | 1 |
| C19orf70 | 879991  | 295 | 21  | 307940  | 86152  | 0 | 0 | 0 | 0 | 50 | 57  | 20179860 | 1 | 1 |
| C19orf71 | 2160126 | 269 | 39  | 530440  | 159488 | 0 | 0 | 0 | 0 | 50 | 60  | 21798948 | 1 | 1 |
| C19orf75 | 352763  | 629 | 1   | 508012  | 143468 | 0 | 0 | 0 | 0 | 50 | 65  | 22440104 | 1 | 1 |
| C19orf76 | 1733181 | 195 | 36  | 366324  | 131364 | 0 | 0 | 0 | 0 | 9  | 8   | 4296208  | 1 | 1 |
| C19orf77 | NaN     | NaN | NaN | 345676  | 89000  | 0 | 0 | 0 | 0 | 50 | 116 | 39734584 | 1 | 1 |
| C1QB     | 389456  | 541 | 29  | 626560  | 195800 | 0 | 0 | 2 | 0 | 3  | 2   | 875760   | 1 | 1 |
| C1QBP    | 1145030 | 544 | 24  | 720544  | 209684 | 0 | 0 | 0 | 0 | 50 | 77  | 22011836 | 1 | 1 |
| C1QC     | 389456  | 541 | 29  | 599148  | 197580 | 0 | 0 | 0 | 0 | 50 | 56  | 21614896 | 1 | 1 |

|          |         |      |     |         |         |   |   |   |   |    |     |          |   |   |
|----------|---------|------|-----|---------|---------|---|---|---|---|----|-----|----------|---|---|
| C1QL2    | 169866  | 574  | 10  | 697760  | 229264  | 0 | 0 | 1 | 0 | 50 | 46  | 19603496 | 1 | 1 |
| C1QL3    | 96710   | 791  | -1  | 626916  | 197580  | 0 | 0 | 0 | 0 | 50 | 51  | 25206936 | 1 | 1 |
| C1QTNF6  | 668971  | 289  | 53  | 709508  | 199360  | 0 | 0 | 0 | 0 | 50 | 45  | 17293056 | 1 | 1 |
| C1QTNF8  | 1154740 | 294  | 20  | 614456  | 208972  | 0 | 0 | 0 | 0 | 50 | 63  | 24684684 | 1 | 1 |
| C1orf100 | 706923  | 537  | -1  | 388396  | 105020  | 0 | 0 | 0 | 0 | 50 | 92  | 23798244 | 1 | 1 |
| C1orf103 | 406255  | 715  | 28  | 1930232 | 549664  | 0 | 0 | 0 | 0 | 11 | 12  | 7102912  | 1 | 1 |
| C1orf104 | NaN     | NaN  | NaN | 556072  | 203276  | 0 | 0 | 0 | 0 | 50 | 116 | 39848860 | 1 | 1 |
| C1orf107 | 221666  | 464  | 7   | 1964764 | 509792  | 0 | 0 | 0 | 0 | 15 | 19  | 7305120  | 1 | 1 |
| C1orf109 | 445023  | 375  | 27  | 521184  | 149520  | 0 | 0 | 2 | 0 | 13 | 13  | 4332164  | 1 | 1 |
| C1orf113 | 685495  | 212  | 32  | 1923824 | 569956  | 0 | 0 | 0 | 0 | 3  | 6   | 1906380  | 1 | 1 |
| C1orf114 | 286300  | 491  | 7   | 1334288 | 317908  | 0 | 0 | 0 | 0 | 7  | 8   | 2818808  | 1 | 1 |
| C1orf122 | 445096  | 375  | 33  | 275188  | 93272   | 0 | 0 | 0 | 0 | 50 | 50  | 19791820 | 1 | 1 |
| C1orf124 | 377235  | 569  | 2   | 1285160 | 337132  | 0 | 0 | 0 | 0 | 29 | 41  | 12912120 | 1 | 1 |
| C1orf125 | 495704  | 593  | -2  | 2746184 | 655396  | 0 | 0 | 0 | 0 | 3  | 6   | 2673204  | 1 | 1 |
| C1orf128 | 903441  | 254  | 32  | 552512  | 148096  | 0 | 0 | 0 | 0 | 50 | 57  | 18158136 | 1 | 1 |
| C1orf129 | 385644  | 965  | -9  | 2375588 | 608404  | 0 | 0 | 0 | 0 | 1  | 1   | 1019940  | 1 | 1 |
| C1orf130 | 468063  | 348  | 28  | 260592  | 82236   | 0 | 0 | 0 | 0 | 50 | 59  | 20065584 | 1 | 1 |
| C1orf135 | 746382  | 372  | 24  | 912784  | 242792  | 0 | 0 | 0 | 0 | 50 | 64  | 28906488 | 1 | 1 |
| C1orf14  | 757638  | 424  | 20  | 1674980 | 458884  | 0 | 0 | 0 | 0 | 12 | 19  | 5715936  | 1 | 1 |
| C1orf144 | 783285  | 176  | 42  | 402636  | 100392  | 0 | 0 | 0 | 0 | 50 | 73  | 23177024 | 1 | 1 |
| C1orf150 | 204354  | 957  | -25 | 368816  | 86152   | 0 | 0 | 0 | 0 | 50 | 111 | 25819256 | 1 | 1 |
| C1orf151 | 775439  | 271  | 32  | 217160  | 50908   | 0 | 0 | 0 | 0 | 50 | 62  | 21875844 | 1 | 1 |
| C1orf156 | 244851  | 614  | 10  | 948028  | 249200  | 0 | 0 | 0 | 0 | 9  | 14  | 6536160  | 1 | 1 |
| C1orf161 | 591845  | 538  | 12  | 929516  | 254896  | 0 | 0 | 0 | 0 | 50 | 63  | 21307668 | 1 | 1 |
| C1orf162 | 397300  | 348  | 28  | 402992  | 118192  | 0 | 0 | 0 | 0 | 50 | 30  | 19906096 | 1 | 1 |
| C1orf163 | 678946  | 261  | 27  | 605912  | 148096  | 0 | 0 | 0 | 0 | 50 | 72  | 23244664 | 1 | 1 |
| C1orf172 | 1025094 | 188  | 34  | 982916  | 308296  | 0 | 0 | 0 | 0 | 1  | 1   | 703812   | 1 | 1 |
| C1orf173 | 101813  | 1070 | -14 | 3901048 | 1064084 | 0 | 0 | 0 | 0 | 0  | 0   | 1064084  | 1 | 1 |
| C1orf174 | 248975  | 412  | 20  | 616948  | 177644  | 0 | 0 | 1 | 0 | 4  | 2   | 1133148  | 1 | 1 |
| C1orf175 | 652892  | 415  | 15  | 3344976 | 993240  | 0 | 0 | 0 | 0 | 0  | 0   | 993240   | 1 | 1 |
| C1orf182 | 2199280 | 201  | 27  | 324672  | 89712   | 0 | 0 | 0 | 0 | 50 | 86  | 24636980 | 1 | 1 |
| C1orf183 | 346154  | 440  | 31  | 751160  | 224992  | 0 | 0 | 0 | 0 | 50 | 56  | 23952748 | 1 | 1 |
| C1orf185 | NaN     | NaN  | NaN | 523676  | 134212  | 0 | 0 | 0 | 0 | 50 | 116 | 39779796 | 1 | 1 |

|          |         |     |     |         |        |   |   |   |   |    |     |          |   |   |
|----------|---------|-----|-----|---------|--------|---|---|---|---|----|-----|----------|---|---|
| C1orf187 | 682357  | 264 | 32  | 878252  | 268780 | 0 | 0 | 0 | 0 | 4  | 4   | 964048   | 1 | 1 |
| C1orf190 | 908945  | 190 | 29  | 588112  | 187256 | 0 | 0 | 0 | 0 | 50 | 82  | 25648732 | 1 | 1 |
| C1orf192 | 751212  | 293 | 30  | 455324  | 134212 | 0 | 0 | 0 | 0 | 50 | 50  | 22076272 | 1 | 1 |
| C1orf201 | 748641  | 197 | 26  | 746532  | 203988 | 0 | 0 | 0 | 0 | 50 | 64  | 24787212 | 1 | 1 |
| C1orf204 | NaN     | NaN | NaN | 597368  | 181204 | 0 | 0 | 0 | 0 | 50 | 116 | 39826788 | 1 | 1 |
| C1orf210 | 1091212 | 264 | 30  | 280528  | 93272  | 0 | 0 | 0 | 0 | 50 | 55  | 21358220 | 1 | 1 |
| C1orf212 | NaN     | NaN | NaN | 234604  | 67640  | 0 | 0 | 0 | 0 | 50 | 116 | 39713224 | 1 | 1 |
| C1orf213 | 1032187 | 163 | 25  | 380208  | 119616 | 0 | 0 | 0 | 0 | 50 | 98  | 21204072 | 1 | 1 |
| C1orf223 | NaN     | NaN | NaN | 514776  | 152724 | 0 | 0 | 0 | 0 | 50 | 116 | 39798308 | 1 | 1 |
| C1orf226 | 363646  | 391 | 1   | 776792  | 248488 | 0 | 0 | 0 | 0 | 50 | 54  | 19589612 | 1 | 1 |
| C1orf227 | 326908  | 445 | 13  | 264152  | 63724  | 0 | 0 | 0 | 0 | 50 | 47  | 18388112 | 1 | 1 |
| C1orf228 | NaN     | NaN | NaN | 1144184 | 315772 | 0 | 0 | 0 | 0 | 50 | 116 | 39961356 | 1 | 1 |
| C1orf229 | NaN     | NaN | NaN | 542900  | 219652 | 0 | 0 | 0 | 0 | 50 | 116 | 39865236 | 1 | 1 |
| C1orf230 | NaN     | NaN | NaN | 252048  | 63012  | 0 | 0 | 0 | 0 | 50 | 116 | 39708596 | 1 | 1 |
| C1orf25  | 344321  | 458 | -3  | 1908872 | 502672 | 0 | 0 | 0 | 0 | 48 | 64  | 22686100 | 1 | 1 |
| C1orf26  | 333911  | 535 | -7  | 2385200 | 578500 | 0 | 0 | 0 | 0 | 21 | 17  | 8629440  | 1 | 1 |
| C1orf31  | 247580  | 299 | 10  | 330724  | 83660  | 0 | 0 | 0 | 0 | 50 | 52  | 20001860 | 1 | 1 |
| C1orf38  | 804118  | 218 | 23  | 1623716 | 463156 | 0 | 0 | 0 | 0 | 29 | 27  | 10167360 | 1 | 1 |
| C1orf49  | 341211  | 348 | -10 | 738344  | 174796 | 0 | 0 | 0 | 0 | 50 | 41  | 19634824 | 1 | 1 |
| C1orf50  | 820426  | 426 | 30  | 515488  | 144536 | 0 | 0 | 0 | 0 | 50 | 65  | 22644448 | 1 | 1 |
| C1orf51  | 1213150 | 197 | 38  | 957996  | 295836 | 0 | 0 | 0 | 0 | 29 | 24  | 10186584 | 1 | 1 |
| C1orf53  | 98527   | 448 | -18 | 366680  | 111784 | 0 | 0 | 0 | 0 | 50 | 44  | 18122892 | 1 | 1 |
| C1orf55  | 923085  | 239 | 20  | 1159136 | 316840 | 0 | 0 | 0 | 0 | 50 | 52  | 17968032 | 1 | 1 |
| C1orf57  | 141149  | 615 | -2  | 486296  | 144892 | 0 | 0 | 0 | 0 | 50 | 50  | 20340416 | 1 | 1 |
| C1orf58  | 221959  | 236 | -1  | 1095768 | 277680 | 0 | 0 | 0 | 0 | 50 | 48  | 21277052 | 1 | 1 |
| C1orf59  | 679610  | 225 | 3   | 1014244 | 278036 | 0 | 0 | 0 | 0 | 50 | 60  | 22708884 | 1 | 1 |
| C1orf63  | 613835  | 460 | 36  | 718052  | 231400 | 0 | 0 | 0 | 0 | 50 | 56  | 23795752 | 1 | 1 |
| C1orf65  | 368078  | 600 | -10 | 1539700 | 460664 | 0 | 0 | 0 | 0 | 6  | 3   | 1747248  | 1 | 1 |
| C1orf66  | 1750604 | 179 | 45  | 1223572 | 331436 | 0 | 0 | 0 | 0 | 1  | 0   | 482736   | 1 | 1 |
| C1orf68  | NaN     | NaN | NaN | 621220  | 182984 | 0 | 0 | 0 | 0 | 50 | 116 | 39828568 | 1 | 1 |
| C1orf69  | 702358  | 341 | 15  | 846924  | 307584 | 0 | 0 | 0 | 0 | 11 | 7   | 3192252  | 1 | 1 |
| C1orf70  | NaN     | NaN | NaN | 448204  | 124244 | 0 | 0 | 0 | 0 | 50 | 116 | 39769828 | 1 | 1 |
| C1orf77  | 1656449 | 183 | 40  | 614456  | 204700 | 0 | 0 | 0 | 0 | 50 | 74  | 21280612 | 1 | 1 |



|           |         |     |     |         |         |   |   |   |   |    |     |          |   |   |
|-----------|---------|-----|-----|---------|---------|---|---|---|---|----|-----|----------|---|---|
| C1orf83   | 446494  | 225 | 28  | 539696  | 147028  | 0 | 0 | 0 | 0 | 50 | 61  | 20216172 | 1 | 1 |
| C1orf84   | 1088321 | 252 | 27  | 456748  | 135992  | 0 | 0 | 0 | 0 | 50 | 56  | 22185208 | 1 | 1 |
| C1orf85   | 2266205 | 211 | 33  | 996444  | 331080  | 0 | 0 | 0 | 0 | 50 | 61  | 22146048 | 1 | 1 |
| C1orf88   | 398726  | 559 | 15  | 510504  | 128160  | 0 | 0 | 0 | 0 | 50 | 61  | 21076268 | 1 | 1 |
| C1orf89   | 824719  | 186 | 40  | 642580  | 204344  | 0 | 0 | 0 | 0 | 50 | 48  | 17520896 | 1 | 1 |
| C1orf9    | 116362  | 506 | 10  | 3255264 | 864012  | 0 | 0 | 0 | 0 | 0  | 0   | 864012   | 1 | 1 |
| C1orf91   | 1460758 | 218 | 29  | 359560  | 113564  | 0 | 0 | 0 | 0 | 50 | 52  | 21684672 | 1 | 1 |
| C1orf92   | 1172126 | 244 | 39  | 1433256 | 420792  | 0 | 0 | 0 | 0 | 17 | 17  | 5732668  | 1 | 1 |
| C1orf93   | 323457  | 335 | 30  | 510504  | 154860  | 0 | 0 | 0 | 0 | 50 | 41  | 20137140 | 1 | 1 |
| C1orf96   | 285692  | 361 | 9   | 683520  | 197580  | 0 | 0 | 0 | 0 | 50 | 71  | 23765848 | 1 | 1 |
| C20orf103 | 74540   | 807 | -42 | 726952  | 194732  | 0 | 0 | 0 | 0 | 18 | 18  | 8531540  | 1 | 1 |
| C20orf106 | 264053  | 455 | -17 | 444288  | 119616  | 0 | 0 | 0 | 0 | 50 | 65  | 20944192 | 1 | 1 |
| C20orf107 | 273023  | 455 | -27 | 439304  | 120328  | 0 | 0 | 0 | 0 | 50 | 100 | 24792196 | 1 | 1 |
| C20orf108 | 254679  | 672 | -43 | 467784  | 161268  | 0 | 0 | 0 | 0 | 33 | 67  | 17771520 | 1 | 1 |
| C20orf11  | 961230  | 336 | 40  | 599148  | 151656  | 0 | 0 | 0 | 0 | 50 | 82  | 23029640 | 1 | 1 |
| C20orf111 | 515643  | 367 | 28  | 734072  | 217516  | 0 | 0 | 0 | 0 | 33 | 42  | 14272396 | 1 | 1 |
| C20orf112 | 677178  | 310 | 61  | 1107160 | 322892  | 0 | 0 | 0 | 0 | 50 | 38  | 17449696 | 1 | 1 |
| C20orf114 | 478384  | 482 | 27  | 1245288 | 372732  | 0 | 0 | 0 | 0 | 8  | 0   | 2332512  | 1 | 1 |
| C20orf117 | 802783  | 231 | 67  | 4159148 | 1289788 | 0 | 0 | 0 | 0 | 0  | 0   | 1289788  | 1 | 1 |
| C20orf118 | 817783  | 225 | 47  | 561768  | 158064  | 0 | 0 | 0 | 0 | 50 | 68  | 25624524 | 1 | 1 |
| C20orf12  | 414892  | 436 | 2   | 1961916 | 536136  | 0 | 0 | 0 | 0 | 32 | 27  | 13442204 | 1 | 1 |
| C20orf123 | NaN     | NaN | NaN | 1344256 | 483092  | 0 | 0 | 0 | 0 | 50 | 116 | 40128676 | 1 | 1 |
| C20orf132 | 808071  | 360 | 45  | 2697412 | 756500  | 0 | 0 | 0 | 0 | 1  | 0   | 1299044  | 1 | 1 |
| C20orf134 | NaN     | NaN | NaN | 583840  | 204344  | 0 | 0 | 0 | 0 | 50 | 116 | 39849928 | 1 | 1 |
| C20orf135 | 1123741 | 206 | 44  | 1118196 | 389820  | 0 | 0 | 0 | 0 | 13 | 15  | 6638332  | 1 | 1 |
| C20orf141 | 796251  | 438 | 41  | 391600  | 146672  | 0 | 0 | 1 | 0 | 50 | 52  | 19055612 | 1 | 1 |
| C20orf144 | NaN     | NaN | NaN | 373800  | 128160  | 0 | 0 | 0 | 0 | 50 | 116 | 39773744 | 1 | 1 |
| C20orf151 | 1190462 | 205 | 28  | 1653976 | 532220  | 0 | 0 | 0 | 0 | 4  | 3   | 2923472  | 1 | 1 |
| C20orf152 | 1308823 | 144 | 53  | 1504456 | 380564  | 0 | 0 | 0 | 0 | 50 | 49  | 21453628 | 1 | 1 |
| C20orf160 | 1022704 | 386 | 29  | 1081172 | 345676  | 0 | 0 | 0 | 0 | 50 | 54  | 19949528 | 1 | 1 |
| C20orf165 | 725555  | 209 | 59  | 555716  | 183340  | 0 | 0 | 0 | 0 | 27 | 40  | 9561092  | 1 | 1 |
| C20orf166 | 1191147 | NaN | 20  | 304024  | 84728   | 0 | 0 | 0 | 0 | 50 | 50  | 20525536 | 1 | 1 |
| C20orf173 | NaN     | NaN | NaN | 532932  | 138840  | 0 | 0 | 0 | 0 | 50 | 116 | 39784424 | 1 | 1 |

|           |         |     |     |         |        |   |   |   |   |    |     |          |   |   |
|-----------|---------|-----|-----|---------|--------|---|---|---|---|----|-----|----------|---|---|
| C20orf177 | 73597   | 856 | -36 | 951588  | 283020 | 0 | 0 | 0 | 0 | 50 | 68  | 20110084 | 1 | 1 |
| C20orf185 | 515931  | 491 | 46  | 1188684 | 401568 | 0 | 0 | 0 | 0 | 15 | 9   | 6738012  | 1 | 1 |
| C20orf186 | 515931  | 491 | 46  | 1538632 | 498044 | 0 | 0 | 0 | 0 | 12 | 7   | 6045592  | 1 | 1 |
| C20orf197 | 73705   | 930 | -58 | 322892  | 88288  | 0 | 0 | 0 | 0 | 50 | 51  | 18383484 | 1 | 1 |
| C20orf20  | 1044503 | 208 | 48  | 539340  | 136704 | 0 | 0 | 0 | 0 | 50 | 65  | 20186624 | 1 | 1 |
| C20orf201 | NaN     | NaN | NaN | 568176  | 210396 | 0 | 0 | 0 | 0 | 50 | 116 | 39855980 | 1 | 1 |
| C20orf202 | NaN     | NaN | NaN | 309008  | 91492  | 0 | 0 | 0 | 0 | 50 | 116 | 39737076 | 1 | 1 |
| C20orf203 | NaN     | NaN | NaN | 477040  | 156284 | 0 | 0 | 0 | 0 | 50 | 116 | 39801868 | 1 | 1 |
| C20orf24  | 1019481 | 176 | 62  | 486296  | 126736 | 0 | 0 | 0 | 0 | 50 | 44  | 18338984 | 1 | 1 |
| C20orf26  | 228680  | 750 | -3  | 3252416 | 859384 | 0 | 0 | 0 | 0 | 5  | 7   | 2546468  | 1 | 1 |
| C20orf29  | 740484  | 241 | 42  | 485228  | 167320 | 0 | 0 | 0 | 0 | 4  | 3   | 1253832  | 1 | 1 |
| C20orf3   | 545344  | 676 | -29 | 1055184 | 317196 | 0 | 0 | 0 | 0 | 50 | 56  | 19251056 | 1 | 1 |
| C20orf30  | 494904  | 385 | 26  | 462088  | 146672 | 0 | 0 | 0 | 0 | 50 | 60  | 20022864 | 1 | 1 |
| C20orf4   | 1278077 | 449 | 44  | 967964  | 278392 | 0 | 0 | 0 | 0 | 18 | 25  | 8306904  | 1 | 1 |
| C20orf43  | 255083  | 551 | -7  | 809188  | 208616 | 0 | 0 | 0 | 0 | 50 | 52  | 20618452 | 1 | 1 |
| C20orf46  | 442604  | 527 | 22  | 613032  | 214668 | 0 | 0 | 0 | 0 | 50 | 83  | 28195912 | 1 | 1 |
| C20orf54  | 764796  | 557 | 31  | 1139912 | 383056 | 0 | 0 | 0 | 0 | 43 | 62  | 21007560 | 1 | 1 |
| C20orf7   | 125337  | 703 | -6  | 936636  | 238164 | 0 | 0 | 0 | 0 | 24 | 33  | 11910336 | 1 | 1 |
| C20orf70  | 418196  | 491 | 31  | 648988  | 186188 | 0 | 0 | 0 | 0 | 50 | 44  | 17537984 | 1 | 1 |
| C20orf71  | 478384  | 482 | 27  | 671060  | 171592 | 0 | 0 | 0 | 0 | 50 | 51  | 25529828 | 1 | 1 |
| C20orf72  | 756104  | 499 | 29  | 891068  | 231400 | 0 | 0 | 0 | 0 | 50 | 68  | 23326188 | 1 | 1 |
| C20orf79  | 256301  | 699 | 4   | 395160  | 111072 | 0 | 0 | 0 | 0 | 50 | 62  | 22399876 | 1 | 1 |
| C20orf94  | 165910  | 412 | -17 | 1056608 | 281596 | 0 | 0 | 0 | 0 | 50 | 37  | 20003996 | 1 | 1 |
| C20orf96  | 1010597 | 348 | 24  | 973660  | 235316 | 0 | 0 | 3 | 0 | 7  | 7   | 1817380  | 1 | 1 |
| C21orf29  | 860604  | 461 | 30  | 1685660 | 510148 | 0 | 0 | 0 | 0 | 0  | 0   | 510148   | 1 | 1 |
| C21orf33  | 879237  | 219 | 61  | 681740  | 207904 | 0 | 0 | 0 | 0 | 50 | 43  | 18931724 | 1 | 1 |
| C21orf45  | 436753  | 379 | 8   | 610184  | 158776 | 0 | 0 | 0 | 0 | 50 | 69  | 24300916 | 1 | 1 |
| C21orf56  | 758870  | 488 | 39  | 836244  | 269136 | 0 | 0 | 0 | 0 | 1  | 0   | 395872   | 1 | 1 |
| C21orf57  | 940047  | 624 | 53  | 457104  | 124956 | 0 | 0 | 0 | 0 | 50 | 58  | 20984420 | 1 | 1 |
| C21orf63  | 268842  | 162 | 39  | 1133504 | 312568 | 0 | 0 | 0 | 0 | 50 | 54  | 16442572 | 1 | 1 |
| C21orf7   | 316263  | 146 | 77  | 640800  | 167676 | 0 | 0 | 0 | 0 | 50 | 67  | 21678264 | 1 | 1 |
| C21orf70  | 746455  | 191 | 74  | 583840  | 179780 | 0 | 0 | 0 | 0 | 41 | 42  | 16971588 | 1 | 1 |
| C22orf13  | 480889  | 194 | 48  | 627984  | 165540 | 0 | 0 | 0 | 0 | 50 | 44  | 18325456 | 1 | 1 |

|          |         |     |     |         |         |   |   |   |   |    |     |          |   |   |
|----------|---------|-----|-----|---------|---------|---|---|---|---|----|-----|----------|---|---|
| C22orf15 | 637355  | 196 | 52  | 384836  | 113920  | 0 | 0 | 0 | 0 | 50 | 63  | 20521620 | 1 | 1 |
| C22orf24 | 531528  | 344 | -1  | 411892  | 112496  | 0 | 0 | 0 | 0 | 50 | 54  | 19869072 | 1 | 1 |
| C22orf25 | 587146  | 218 | 50  | 726240  | 195444  | 0 | 0 | 0 | 0 | 50 | 52  | 19020368 | 1 | 1 |
| C22orf26 | NaN     | NaN | NaN | 323248  | 128516  | 0 | 0 | 0 | 0 | 50 | 116 | 39774100 | 1 | 1 |
| C22orf28 | 392443  | 401 | -6  | 1315420 | 352796  | 0 | 0 | 0 | 0 | 6  | 18  | 4575668  | 1 | 1 |
| C22orf30 | 547970  | 268 | 36  | 5433272 | 1495912 | 0 | 0 | 0 | 0 | 0  | 0   | 1495912  | 1 | 1 |
| C22orf32 | 1321127 | 363 | 65  | 270204  | 86508   | 0 | 0 | 0 | 0 | 50 | 55  | 15728436 | 1 | 1 |
| C22orf33 | 724899  | 379 | 44  | 731936  | 191884  | 0 | 0 | 0 | 0 | 50 | 67  | 27206944 | 1 | 1 |
| C22orf36 | NaN     | NaN | NaN | 756144  | 271272  | 0 | 0 | 0 | 0 | 50 | 116 | 39916856 | 1 | 1 |
| C22orf39 | 650407  | 300 | 16  | 406908  | 116412  | 0 | 0 | 0 | 0 | 50 | 53  | 20360352 | 1 | 1 |
| C22orf40 | 519654  | 205 | 31  | 322180  | 85796   | 0 | 0 | 0 | 0 | 50 | 72  | 19238596 | 1 | 1 |
| C22orf41 | NaN     | NaN | NaN | 239232  | 52332   | 0 | 0 | 0 | 0 | 50 | 116 | 39697916 | 1 | 1 |
| C22orf43 | 604420  | 399 | 31  | 638664  | 145248  | 0 | 0 | 0 | 0 | 50 | 47  | 18688220 | 1 | 1 |
| C22orf46 | NaN     | NaN | NaN | 605912  | 182272  | 0 | 0 | 0 | 0 | 50 | 116 | 39827856 | 1 | 1 |
| C22orf9  | 417645  | 225 | 9   | 1122824 | 301888  | 0 | 0 | 0 | 0 | 18 | 22  | 8061976  | 1 | 1 |
| C2CD4A   | 125995  | 446 | 20  | 845856  | 343896  | 0 | 0 | 0 | 0 | 50 | 54  | 19716704 | 1 | 1 |
| C2CD4C   | NaN     | NaN | NaN | 1002140 | 354220  | 0 | 0 | 0 | 0 | 50 | 116 | 39999804 | 1 | 1 |
| C2CD4D   | NaN     | NaN | NaN | 809900  | 326452  | 0 | 0 | 0 | 0 | 50 | 116 | 39972036 | 1 | 1 |
| C2orf18  | 1266654 | 231 | 40  | 925244  | 290140  | 0 | 0 | 0 | 0 | 33 | 55  | 17466784 | 1 | 1 |
| C2orf24  | 773232  | 177 | 36  | 1025992 | 320756  | 0 | 0 | 0 | 0 | 12 | 9   | 4375240  | 1 | 1 |
| C2orf27A | NaN     | NaN | NaN | 501960  | 160200  | 0 | 0 | 0 | 0 | 50 | 116 | 39805784 | 1 | 1 |
| C2orf27B | NaN     | NaN | NaN | 511928  | 165184  | 0 | 0 | 0 | 0 | 50 | 116 | 39810768 | 1 | 1 |
| C2orf28  | 1238919 | 230 | 39  | 721256  | 217516  | 0 | 0 | 0 | 0 | 50 | 56  | 18256392 | 1 | 1 |
| C2orf29  | 413646  | 262 | 19  | 1282668 | 382344  | 0 | 0 | 0 | 0 | 30 | 38  | 12130344 | 1 | 1 |
| C2orf3   | 136392  | 523 | 4   | 2062308 | 511572  | 0 | 0 | 0 | 0 | 2  | 0   | 771096   | 1 | 1 |
| C2orf34  | 414128  | 685 | 26  | 853332  | 227484  | 0 | 0 | 0 | 0 | 17 | 14  | 9265256  | 1 | 1 |
| C2orf39  | 751542  | 408 | 42  | 1965476 | 479176  | 0 | 0 | 0 | 0 | 9  | 11  | 4922412  | 1 | 1 |
| C2orf50  | 466103  | 384 | 26  | 409756  | 125312  | 0 | 0 | 1 | 0 | 39 | 47  | 15635520 | 1 | 1 |
| C2orf51  | 120457  | 497 | 2   | 468140  | 124600  | 0 | 0 | 0 | 0 | 50 | 38  | 16927088 | 1 | 1 |
| C2orf53  | 1214097 | 238 | 50  | 972592  | 350660  | 0 | 0 | 0 | 0 | 15 | 24  | 8286612  | 1 | 1 |
| C2orf55  | 493189  | 692 | 29  | 2354940 | 768960  | 0 | 0 | 0 | 0 | 11 | 2   | 2750812  | 1 | 1 |
| C2orf56  | 488101  | 253 | 42  | 1139912 | 316840  | 0 | 0 | 0 | 0 | 24 | 18  | 8787504  | 1 | 1 |
| C2orf60  | 226122  | 602 | 18  | 844788  | 208260  | 0 | 0 | 0 | 0 | 50 | 38  | 20562204 | 1 | 1 |

|         |         |     |     |         |        |   |   |   |   |    |     |          |   |   |
|---------|---------|-----|-----|---------|--------|---|---|---|---|----|-----|----------|---|---|
| C2orf62 | 734742  | 197 | 37  | 1007124 | 276612 | 0 | 0 | 0 | 0 | 12 | 17  | 6139220  | 1 | 1 |
| C2orf63 | 967446  | 333 | 25  | 1550380 | 377360 | 0 | 0 | 0 | 0 | 0  | 0   | 377360   | 1 | 1 |
| C2orf64 | 260302  | 696 | 39  | 201852  | 49128  | 0 | 0 | 0 | 0 | 50 | 65  | 21358576 | 1 | 1 |
| C2orf65 | 996981  | 278 | 50  | 1357784 | 386260 | 0 | 0 | 0 | 0 | 50 | 62  | 20826000 | 1 | 1 |
| C2orf66 | 404194  | 370 | 14  | 299396  | 87220  | 0 | 0 | 2 | 0 | 2  | 5   | 781064   | 1 | 1 |
| C2orf67 | 190249  | 712 | 1   | 2572812 | 652548 | 0 | 0 | 0 | 0 | 16 | 15  | 8521216  | 1 | 1 |
| C2orf7  | 536944  | 452 | 20  | 487364  | 137416 | 0 | 0 | 0 | 0 | 50 | 54  | 17210108 | 1 | 1 |
| C2orf72 | NaN     | NaN | NaN | 692776  | 264152 | 0 | 0 | 0 | 0 | 50 | 116 | 39909736 | 1 | 1 |
| C2orf73 | 659505  | 429 | 8   | 746532  | 195444 | 0 | 0 | 1 | 0 | 50 | 54  | 19842728 | 1 | 1 |
| C2orf74 | NaN     | NaN | NaN | 506232  | 131364 | 0 | 0 | 0 | 0 | 50 | 116 | 39776948 | 1 | 1 |
| C2orf77 | 345692  | 393 | 35  | 1480960 | 327164 | 0 | 0 | 0 | 0 | 33 | 34  | 14103652 | 1 | 1 |
| C2orf79 | 299133  | 374 | 39  | 351728  | 108580 | 0 | 0 | 0 | 0 | 50 | 53  | 17494552 | 1 | 1 |
| C2orf81 | NaN     | NaN | NaN | 1421152 | 478820 | 0 | 0 | 0 | 0 | 50 | 116 | 40124404 | 1 | 1 |
| C2orf82 | NaN     | NaN | NaN | 293700  | 110004 | 0 | 0 | 0 | 0 | 50 | 116 | 39755588 | 1 | 1 |
| C2orf83 | 186199  | 353 | 25  | 467428  | 130652 | 0 | 0 | 1 | 0 | 0  | 1   | 130652   | 1 | 1 |
| C2orf84 | 320978  | 385 | 35  | 547884  | 136704 | 0 | 0 | 0 | 0 | 50 | 47  | 18904312 | 1 | 1 |
| C2orf85 | 521265  | 487 | 30  | 1393384 | 451052 | 0 | 0 | 0 | 0 | 1  | 4   | 890000   | 1 | 1 |
| C2orf86 | 334800  | 642 | 3   | 1975800 | 517980 | 0 | 0 | 0 | 0 | 45 | 48  | 16760480 | 1 | 1 |
| C2orf89 | 725789  | 275 | 5   | 1141336 | 346388 | 0 | 0 | 0 | 0 | 50 | 83  | 28220476 | 1 | 1 |
| C3orf1  | 290702  | 599 | 38  | 733716  | 208260 | 0 | 0 | 0 | 0 | 50 | 49  | 19375656 | 1 | 1 |
| C3orf10 | 825905  | 170 | 39  | 202920  | 51264  | 0 | 0 | 0 | 0 | 50 | 47  | 17447560 | 1 | 1 |
| C3orf15 | 368404  | 568 | 31  | 2016740 | 517624 | 0 | 0 | 0 | 0 | 22 | 40  | 13435440 | 1 | 1 |
| C3orf16 | NaN     | NaN | NaN | 1381280 | 386260 | 0 | 0 | 0 | 0 | 50 | 116 | 40031844 | 1 | 1 |
| C3orf19 | 561517  | 424 | 39  | 1239592 | 304736 | 0 | 0 | 0 | 0 | 50 | 75  | 26834568 | 1 | 1 |
| C3orf21 | 431673  | 536 | 46  | 975084  | 300108 | 0 | 0 | 0 | 0 | 50 | 58  | 20550100 | 1 | 1 |
| C3orf22 | 289633  | 508 | 52  | 357424  | 110360 | 0 | 0 | 0 | 0 | 50 | 55  | 23322984 | 1 | 1 |
| C3orf23 | 319459  | 418 | 27  | 1362412 | 326096 | 0 | 0 | 0 | 0 | 50 | 54  | 21600656 | 1 | 1 |
| C3orf24 | 825905  | 170 | 39  | 448916  | 129940 | 0 | 0 | 0 | 0 | 50 | 47  | 17447560 | 1 | 1 |
| C3orf26 | 267848  | 573 | 10  | 765756  | 184764 | 0 | 0 | 0 | 0 | 50 | 46  | 20143192 | 1 | 1 |
| C3orf27 | 1046071 | 282 | 53  | 359560  | 121040 | 0 | 0 | 0 | 0 | 50 | 66  | 18818160 | 1 | 1 |
| C3orf31 | 229249  | 423 | 35  | 826988  | 216448 | 0 | 0 | 0 | 0 | 50 | 60  | 21365340 | 1 | 1 |
| C3orf32 | 93870   | 581 | 8   | 914564  | 258100 | 0 | 0 | 0 | 0 | 50 | 59  | 21381716 | 1 | 1 |
| C3orf33 | 304724  | 473 | 0   | 655396  | 169100 | 0 | 0 | 0 | 0 | 50 | 67  | 25006864 | 1 | 1 |

|         |         |      |     |         |         |   |   |   |   |    |     |          |   |   |
|---------|---------|------|-----|---------|---------|---|---|---|---|----|-----|----------|---|---|
| C3orf34 | 818753  | 446  | 45  | 443220  | 103596  | 0 | 0 | 0 | 0 | 50 | 63  | 24450080 | 1 | 1 |
| C3orf35 | 471302  | 442  | 16  | 533644  | 163760  | 0 | 0 | 0 | 0 | 50 | 53  | 17635884 | 1 | 1 |
| C3orf37 | 1033808 | 136  | 49  | 917768  | 245284  | 0 | 0 | 0 | 0 | 50 | 52  | 20231480 | 1 | 1 |
| C3orf39 | 331914  | 493  | 28  | 1406556 | 454968  | 0 | 0 | 0 | 0 | 10 | 8   | 3334652  | 1 | 1 |
| C3orf43 | 1180405 | 156  | 30  | 547884  | 149520  | 0 | 0 | 0 | 0 | 50 | 69  | 20130020 | 1 | 1 |
| C3orf45 | 843769  | 206  | 51  | 410112  | 133500  | 0 | 0 | 0 | 0 | 50 | 68  | 20472848 | 1 | 1 |
| C3orf52 | 268780  | 440  | 28  | 859028  | 238876  | 0 | 0 | 1 | 0 | 50 | 52  | 20365692 | 1 | 1 |
| C3orf54 | 1306720 | 191  | 39  | 703100  | 226060  | 0 | 0 | 0 | 0 | 50 | 70  | 21778300 | 1 | 1 |
| C3orf55 | 147326  | 810  | -11 | 505876  | 96476   | 0 | 0 | 0 | 0 | 50 | 73  | 21755872 | 1 | 1 |
| C3orf57 | 240601  | 602  | -4  | 201140  | 49840   | 0 | 0 | 0 | 0 | 50 | 54  | 18332932 | 1 | 1 |
| C3orf59 | 34577   | 631  | 8   | 1235676 | 344964  | 0 | 0 | 0 | 0 | 50 | 77  | 24846308 | 1 | 1 |
| C3orf63 | 209166  | 363  | 34  | 4395176 | 1121044 | 0 | 0 | 0 | 0 | 4  | 6   | 3103608  | 1 | 1 |
| C3orf64 | 263737  | 581  | -2  | 1192600 | 281240  | 0 | 0 | 0 | 0 | 15 | 7   | 4170184  | 1 | 1 |
| C3orf71 | 1838219 | 241  | 33  | 670704  | 261660  | 0 | 0 | 0 | 0 | 50 | 64  | 19644436 | 1 | 1 |
| C3orf72 | 345888  | 340  | 21  | 421504  | 150944  | 0 | 0 | 0 | 0 | 50 | 44  | 21655124 | 1 | 1 |
| C3orf75 | 884829  | 197  | 44  | 688148  | 192952  | 0 | 0 | 0 | 0 | 50 | 57  | 20048140 | 1 | 1 |
| C3orf77 | NaN     | NaN  | NaN | 4386276 | 1121400 | 0 | 0 | 0 | 0 | 0  | 0   | 1121400  | 1 | 1 |
| C3orf78 | NaN     | NaN  | NaN | 183696  | 50196   | 0 | 0 | 0 | 0 | 50 | 116 | 39695780 | 1 | 1 |
| C3orf79 | 55177   | 914  | -4  | 265932  | 68352   | 0 | 0 | 0 | 0 | 50 | 60  | 19400576 | 1 | 1 |
| C4orf14 | 570731  | 443  | 33  | 1731584 | 537916  | 0 | 0 | 0 | 0 | 50 | 47  | 20860532 | 1 | 1 |
| C4orf21 | 219601  | 647  | 30  | 5452496 | 1407268 | 0 | 0 | 0 | 0 | 1  | 0   | 1715564  | 1 | 1 |
| C4orf23 | 108213  | 416  | 43  | 1920264 | 555360  | 0 | 0 | 0 | 0 | 22 | 25  | 9635852  | 1 | 1 |
| C4orf31 | 106601  | 931  | -7  | 1438240 | 396584  | 0 | 0 | 0 | 0 | 22 | 29  | 11102928 | 1 | 1 |
| C4orf34 | 645570  | 165  | 40  | 265932  | 71556   | 0 | 0 | 0 | 0 | 50 | 40  | 20506312 | 1 | 1 |
| C4orf35 | 264684  | 915  | 25  | 979356  | 291564  | 0 | 0 | 0 | 0 | 50 | 42  | 17431540 | 1 | 1 |
| C4orf36 | 268001  | 603  | 36  | 310788  | 84372   | 0 | 0 | 1 | 0 | 4  | 5   | 1072628  | 1 | 1 |
| C4orf37 | 69244   | 1096 | -24 | 1196872 | 321824  | 0 | 0 | 0 | 0 | 8  | 21  | 4860824  | 1 | 1 |
| C4orf39 | NaN     | NaN  | NaN | 377004  | 131364  | 0 | 0 | 0 | 0 | 50 | 116 | 39776948 | 1 | 1 |
| C4orf40 | 181352  | 975  | 12  | 536848  | 185120  | 0 | 0 | 0 | 0 | 50 | 57  | 17976932 | 1 | 1 |
| C4orf41 | 154470  | 254  | 4   | 2996096 | 761128  | 0 | 0 | 0 | 0 | 3  | 2   | 1538988  | 1 | 1 |
| C4orf43 | 75022   | 1136 | -3  | 555360  | 123888  | 0 | 0 | 0 | 0 | 50 | 57  | 20887588 | 1 | 1 |
| C4orf44 | 612481  | 464  | 32  | 697404  | 205056  | 0 | 0 | 0 | 0 | 50 | 53  | 22900056 | 1 | 1 |
| C4orf46 | 154316  | 534  | -11 | 279816  | 89712   | 0 | 0 | 0 | 0 | 50 | 71  | 24690736 | 1 | 1 |

|          |         |     |     |         |         |   |   |   |   |    |     |          |   |   |
|----------|---------|-----|-----|---------|---------|---|---|---|---|----|-----|----------|---|---|
| C4orf47  | NaN     | NaN | NaN | 818088  | 207192  | 0 | 0 | 0 | 0 | 50 | 116 | 39852776 | 1 | 1 |
| C4orf48  | NaN     | NaN | NaN | 315060  | 115344  | 0 | 0 | 0 | 0 | 50 | 116 | 39760928 | 1 | 1 |
| C4orf49  | 384151  | 208 | 24  | 601640  | 183340  | 0 | 0 | 0 | 0 | 50 | 49  | 21368188 | 1 | 1 |
| C4orf52  | NaN     | NaN | NaN | 178356  | 48060   | 0 | 0 | 0 | 0 | 50 | 116 | 39693644 | 1 | 1 |
| C4orf6   | 57657   | 589 | 10  | 245996  | 63724   | 0 | 0 | 0 | 0 | 50 | 74  | 25586788 | 1 | 1 |
| C4orf7   | 191457  | 928 | 7   | 227128  | 63368   | 0 | 0 | 0 | 0 | 50 | 63  | 21710660 | 1 | 1 |
| C5orf13  | 118271  | 617 | 34  | 308296  | 76184   | 0 | 0 | 0 | 0 | 50 | 44  | 18965188 | 1 | 1 |
| C5orf20  | 625030  | 509 | 47  | 592740  | 192240  | 0 | 0 | 0 | 0 | 50 | 53  | 24138580 | 1 | 1 |
| C5orf23  | 477035  | 487 | -15 | 305804  | 85084   | 0 | 0 | 0 | 0 | 50 | 81  | 22714936 | 1 | 1 |
| C5orf25  | 532154  | 427 | 25  | 1174444 | 327164  | 0 | 0 | 0 | 0 | 24 | 24  | 9815276  | 1 | 1 |
| C5orf30  | 203042  | 531 | 16  | 511216  | 156284  | 0 | 0 | 0 | 0 | 50 | 59  | 20715640 | 1 | 1 |
| C5orf32  | 788704  | 185 | 45  | 252048  | 70488   | 0 | 0 | 0 | 0 | 50 | 74  | 21727748 | 1 | 1 |
| C5orf33  | 184013  | 476 | 2   | 1141336 | 325028  | 0 | 0 | 0 | 0 | 25 | 34  | 13105784 | 1 | 1 |
| C5orf35  | 201203  | 393 | 41  | 776080  | 212888  | 0 | 0 | 0 | 0 | 50 | 66  | 22083036 | 1 | 1 |
| C5orf36  | 162976  | 515 | 3   | 3348536 | 823072  | 0 | 0 | 0 | 0 | 8  | 7   | 3543268  | 1 | 1 |
| C5orf39  | 488323  | 520 | 21  | 479532  | 142044  | 0 | 0 | 0 | 0 | 50 | 69  | 22356800 | 1 | 1 |
| C5orf4   | 525975  | 293 | 35  | 871132  | 231044  | 0 | 0 | 0 | 0 | 50 | 62  | 20636608 | 1 | 1 |
| C5orf40  | NaN     | NaN | NaN | 562836  | 162336  | 0 | 0 | 0 | 0 | 50 | 116 | 39807920 | 1 | 1 |
| C5orf41  | 486042  | 309 | 37  | 1684236 | 428268  | 0 | 0 | 0 | 0 | 6  | 4   | 2157716  | 1 | 1 |
| C5orf43  | 202017  | 385 | 13  | 194020  | 50552   | 0 | 0 | 0 | 0 | 50 | 58  | 21154232 | 1 | 1 |
| C5orf44  | 417990  | 406 | 31  | 1110720 | 283020  | 0 | 0 | 0 | 0 | 22 | 19  | 8191204  | 1 | 1 |
| C5orf47  | NaN     | NaN | NaN | 452476  | 131720  | 0 | 0 | 0 | 0 | 50 | 116 | 39777304 | 1 | 1 |
| C5orf48  | 235652  | 347 | 15  | 354220  | 91136   | 0 | 0 | 0 | 0 | 50 | 55  | 18930300 | 1 | 1 |
| C5orf52  | NaN     | NaN | NaN | 407976  | 115344  | 0 | 0 | 0 | 0 | 50 | 116 | 39760928 | 1 | 1 |
| C5orf53  | 812666  | 260 | 50  | 139552  | 33464   | 0 | 0 | 0 | 0 | 50 | 63  | 20948820 | 1 | 1 |
| C5orf54  | 197504  | 619 | 30  | 1513712 | 396940  | 0 | 0 | 0 | 0 | 6  | 6   | 2982212  | 1 | 1 |
| C5orf55  | 787542  | 399 | 37  | 288360  | 96120   | 0 | 0 | 0 | 0 | 50 | 58  | 23058832 | 1 | 1 |
| C5orf60  | NaN     | NaN | NaN | 698472  | 215736  | 0 | 0 | 0 | 0 | 50 | 116 | 39861320 | 1 | 1 |
| C5orf62  | NaN     | NaN | NaN | 151300  | 48416   | 0 | 0 | 0 | 0 | 50 | 116 | 39694000 | 1 | 1 |
| C6orf1   | 1074764 | 233 | 36  | 398364  | 127092  | 0 | 0 | 1 | 0 | 45 | 43  | 14096176 | 1 | 1 |
| C6orf103 | NaN     | NaN | NaN | 4377732 | 1118196 | 0 | 0 | 0 | 0 | 0  | 0   | 1118196  | 1 | 1 |
| C6orf105 | 117356  | 372 | 24  | 647208  | 176220  | 0 | 0 | 0 | 0 | 50 | 49  | 20253552 | 1 | 1 |
| C6orf106 | 920583  | 132 | 31  | 769316  | 205768  | 0 | 0 | 1 | 0 | 50 | 55  | 18393808 | 1 | 1 |

|          |         |      |     |         |         |   |   |   |   |    |     |          |   |   |
|----------|---------|------|-----|---------|---------|---|---|---|---|----|-----|----------|---|---|
| C6orf108 | 1308754 | 363  | 35  | 494128  | 157352  | 0 | 0 | 0 | 0 | 38 | 56  | 16581768 | 1 | 1 |
| C6orf114 | NaN     | NaN  | NaN | 347456  | 91492   | 0 | 0 | 0 | 0 | 50 | 116 | 39737076 | 1 | 1 |
| C6orf115 | 289502  | 640  | 16  | 212888  | 58384   | 0 | 0 | 0 | 0 | 24 | 30  | 12471748 | 1 | 1 |
| C6orf125 | 1551477 | 328  | 40  | 338556  | 85440   | 0 | 0 | 0 | 0 | 50 | 60  | 24086604 | 1 | 1 |
| C6orf126 | 621095  | 404  | 34  | 264152  | 72268   | 0 | 0 | 0 | 0 | 50 | 56  | 22245372 | 1 | 1 |
| C6orf127 | 621095  | 404  | 34  | 321112  | 82592   | 0 | 0 | 0 | 0 | 50 | 56  | 22245372 | 1 | 1 |
| C6orf129 | 498007  | 434  | 43  | 259880  | 69064   | 0 | 0 | 0 | 0 | 50 | 67  | 24906116 | 1 | 1 |
| C6orf130 | 145501  | 611  | 37  | 410112  | 101460  | 0 | 0 | 0 | 0 | 50 | 56  | 20220800 | 1 | 1 |
| C6orf132 | NaN     | NaN  | NaN | 2813824 | 1012820 | 0 | 0 | 0 | 0 | 0  | 0   | 1012820  | 1 | 1 |
| C6orf134 | 2097865 | 171  | 37  | 854400  | 260592  | 0 | 0 | 0 | 0 | 50 | 76  | 22825296 | 1 | 1 |
| C6orf138 | 100851  | 907  | -18 | 2116064 | 608404  | 0 | 0 | 0 | 0 | 6  | 4   | 3006420  | 1 | 1 |
| C6orf141 | NaN     | NaN  | NaN | 584196  | 200784  | 0 | 0 | 0 | 0 | 50 | 116 | 39846368 | 1 | 1 |
| C6orf142 | 104005  | 635  | -1  | 1190820 | 331080  | 0 | 0 | 0 | 0 | 50 | 46  | 21341488 | 1 | 1 |
| C6orf145 | 336205  | 311  | 17  | 596656  | 163760  | 0 | 0 | 0 | 0 | 50 | 54  | 24945276 | 1 | 1 |
| C6orf146 | 182705  | 353  | 18  | 1313996 | 342472  | 0 | 0 | 0 | 0 | 35 | 32  | 11880788 | 1 | 1 |
| C6orf150 | 723493  | 232  | 21  | 1321472 | 373444  | 0 | 0 | 0 | 0 | 18 | 27  | 7193692  | 1 | 1 |
| C6orf153 | 1200368 | 259  | 40  | 677112  | 183696  | 0 | 0 | 0 | 0 | 50 | 74  | 22706748 | 1 | 1 |
| C6orf154 | 1278255 | 230  | 56  | 782132  | 254896  | 0 | 0 | 0 | 0 | 50 | 54  | 19955936 | 1 | 1 |
| C6orf162 | 222902  | 596  | 14  | 255252  | 67284   | 0 | 0 | 0 | 0 | 44 | 46  | 15301948 | 1 | 1 |
| C6orf163 | NaN     | NaN  | NaN | 872200  | 204344  | 0 | 0 | 0 | 0 | 50 | 116 | 39849928 | 1 | 1 |
| C6orf167 | 91667   | 1258 | 2   | 3245652 | 842652  | 0 | 0 | 0 | 0 | 3  | 2   | 1803140  | 1 | 1 |
| C6orf168 | 259352  | 595  | -11 | 1065508 | 269492  | 0 | 0 | 0 | 0 | 50 | 49  | 17950588 | 1 | 1 |
| C6orf170 | 60566   | 895  | -10 | 3339992 | 825208  | 0 | 0 | 0 | 0 | 2  | 2   | 2114640  | 1 | 1 |
| C6orf174 | 157237  | 811  | -9  | 2349244 | 713780  | 0 | 0 | 0 | 0 | 6  | 3   | 3105388  | 1 | 1 |
| C6orf182 | 390388  | 492  | 33  | 1236032 | 283732  | 0 | 0 | 0 | 0 | 50 | 35  | 17230044 | 1 | 1 |
| C6orf186 | 183030  | 586  | 22  | 926668  | 266288  | 0 | 0 | 0 | 0 | 50 | 40  | 20933512 | 1 | 1 |
| C6orf191 | 72955   | 603  | 26  | 345676  | 89000   | 0 | 0 | 0 | 0 | 50 | 48  | 24186640 | 1 | 1 |
| C6orf192 | 129252  | 443  | 10  | 1173020 | 346744  | 0 | 0 | 0 | 0 | 38 | 54  | 17263152 | 1 | 1 |
| C6orf201 | 181759  | 353  | 22  | 369884  | 94696   | 0 | 0 | 1 | 0 | 9  | 17  | 4129244  | 1 | 1 |
| C6orf204 | 129707  | 1029 | 8   | 2230340 | 552868  | 0 | 0 | 0 | 0 | 17 | 15  | 8042396  | 1 | 1 |
| C6orf211 | 336608  | 468  | 30  | 1144896 | 288360  | 0 | 0 | 0 | 0 | 50 | 39  | 19548316 | 1 | 1 |
| C6orf221 | 732413  | 446  | 18  | 543612  | 165540  | 0 | 0 | 0 | 0 | 50 | 56  | 20226496 | 1 | 1 |
| C6orf223 | 1407986 | 199  | 47  | 665008  | 174440  | 0 | 0 | 0 | 0 | 50 | 56  | 23257836 | 1 | 1 |

|          |         |      |     |         |        |   |   |   |   |    |     |          |   |   |
|----------|---------|------|-----|---------|--------|---|---|---|---|----|-----|----------|---|---|
| C6orf225 | 145073  | 296  | -5  | 208616  | 59452  | 0 | 0 | 0 | 0 | 50 | 56  | 21849856 | 1 | 1 |
| C6orf26  | 2509866 | 183  | 32  | 461732  | 131008 | 0 | 0 | 0 | 0 | 50 | 56  | 22464668 | 1 | 1 |
| C6orf27  | 2509866 | 183  | 32  | 2196876 | 728376 | 0 | 0 | 0 | 0 | 4  | 3   | 2300472  | 1 | 1 |
| C6orf35  | 213310  | 374  | 21  | 360628  | 107156 | 0 | 0 | 0 | 0 | 50 | 49  | 21364628 | 1 | 1 |
| C6orf48  | 2485614 | 188  | 36  | 201140  | 53044  | 0 | 0 | 0 | 0 | 50 | 45  | 21269576 | 1 | 1 |
| C6orf52  | NaN     | NaN  | NaN | 412248  | 97188  | 0 | 0 | 0 | 0 | 50 | 116 | 39742772 | 1 | 1 |
| C6orf57  | 119480  | 618  | 15  | 280884  | 79032  | 0 | 0 | 0 | 0 | 50 | 68  | 21955944 | 1 | 1 |
| C6orf64  | 188770  | 730  | 34  | 446424  | 147384 | 0 | 0 | 0 | 0 | 50 | 57  | 20964484 | 1 | 1 |
| C6orf70  | 233648  | 447  | 3   | 1775728 | 476684 | 0 | 0 | 0 | 0 | 25 | 36  | 14685356 | 1 | 1 |
| C6orf72  | 435829  | 150  | 41  | 858672  | 236028 | 0 | 0 | 0 | 0 | 50 | 47  | 17518048 | 1 | 1 |
| C6orf81  | 621095  | 404  | 34  | 924532  | 280172 | 0 | 0 | 0 | 0 | 3  | 0   | 516200   | 1 | 1 |
| C6orf94  | NaN     | NaN  | NaN | 588112  | 156284 | 0 | 0 | 0 | 0 | 50 | 116 | 39801868 | 1 | 1 |
| C6orf97  | 301605  | 535  | 7   | 1861524 | 477396 | 0 | 0 | 0 | 0 | 21 | 19  | 8722000  | 1 | 1 |
| C7orf10  | 120126  | 802  | -13 | 1137420 | 318264 | 0 | 0 | 0 | 0 | 50 | 74  | 23915368 | 1 | 1 |
| C7orf11  | 221361  | 636  | 20  | 440728  | 142400 | 0 | 0 | 0 | 0 | 15 | 12  | 5997532  | 1 | 1 |
| C7orf16  | 26433   | 889  | 1   | 416520  | 100392 | 0 | 0 | 0 | 0 | 50 | 40  | 20787908 | 1 | 1 |
| C7orf23  | 182644  | 1011 | 28  | 310432  | 83660  | 0 | 0 | 0 | 0 | 50 | 35  | 17531220 | 1 | 1 |
| C7orf27  | 783535  | 226  | 47  | 2016740 | 672484 | 0 | 0 | 0 | 0 | 11 | 13  | 5447512  | 1 | 1 |
| C7orf28A | 2208864 | 358  | 32  | 1306164 | 303312 | 0 | 0 | 0 | 0 | 50 | 54  | 20921052 | 1 | 1 |
| C7orf28B | 700380  | 514  | 57  | 1306164 | 303312 | 0 | 0 | 0 | 0 | 7  | 15  | 4038464  | 1 | 1 |
| C7orf29  | NaN     | NaN  | NaN | 583484  | 175864 | 0 | 0 | 0 | 0 | 50 | 116 | 39821448 | 1 | 1 |
| C7orf30  | 500943  | 169  | 27  | 595232  | 174796 | 0 | 0 | 0 | 0 | 50 | 73  | 23018960 | 1 | 1 |
| C7orf36  | 221842  | 487  | 5   | 585976  | 152012 | 0 | 0 | 0 | 0 | 50 | 63  | 23879412 | 1 | 1 |
| C7orf41  | 656945  | 411  | 31  | 347812  | 83660  | 0 | 0 | 0 | 0 | 50 | 47  | 17476040 | 1 | 1 |
| C7orf42  | 490088  | 228  | 41  | 811324  | 223568 | 0 | 0 | 0 | 0 | 50 | 29  | 16514840 | 1 | 1 |
| C7orf44  | 654530  | 310  | 38  | 393736  | 98612  | 0 | 0 | 0 | 0 | 50 | 62  | 22151032 | 1 | 1 |
| C7orf45  | 414437  | 266  | 34  | 644360  | 151300 | 0 | 0 | 0 | 0 | 50 | 59  | 18847352 | 1 | 1 |
| C7orf46  | 378677  | 441  | 19  | 781064  | 204700 | 0 | 0 | 0 | 0 | 50 | 60  | 23233984 | 1 | 1 |
| C7orf47  | 1479297 | 186  | 60  | 615524  | 215380 | 0 | 0 | 0 | 0 | 45 | 39  | 16383476 | 1 | 1 |
| C7orf49  | 464513  | 594  | 20  | 398720  | 116056 | 0 | 0 | 1 | 0 | 50 | 57  | 15046340 | 1 | 1 |
| C7orf51  | 1479297 | 186  | 60  | 2016740 | 706660 | 0 | 0 | 0 | 0 | 10 | 5   | 3847648  | 1 | 1 |
| C7orf52  | 1022626 | 258  | 39  | 887152  | 311144 | 0 | 0 | 0 | 0 | 50 | 67  | 19705312 | 1 | 1 |
| C7orf53  | 171853  | 470  | -5  | 339980  | 95764  | 0 | 0 | 0 | 0 | 50 | 56  | 18542972 | 1 | 1 |



|          |         |      |     |         |        |   |   |   |   |    |     |          |   |   |
|----------|---------|------|-----|---------|--------|---|---|---|---|----|-----|----------|---|---|
| C7orf55  | 522451  | 339  | 35  | 281952  | 89712  | 0 | 0 | 0 | 0 | 50 | 59  | 20493140 | 1 | 1 |
| C7orf58  | 99302   | 534  | -3  | 2717348 | 709864 | 0 | 0 | 0 | 0 | 6  | 15  | 6018536  | 1 | 1 |
| C7orf59  | 1299015 | 205  | 52  | 253828  | 81524  | 0 | 0 | 0 | 0 | 50 | 42  | 20842020 | 1 | 1 |
| C7orf61  | 1479297 | 186  | 60  | 515488  | 156284 | 0 | 0 | 1 | 0 | 50 | 47  | 17722036 | 1 | 1 |
| C7orf63  | 134871  | 1140 | 2   | 2496628 | 615524 | 0 | 0 | 0 | 0 | 8  | 3   | 2613396  | 1 | 1 |
| C7orf64  | 750974  | 369  | 28  | 946604  | 251692 | 0 | 0 | 0 | 0 | 50 | 55  | 20378508 | 1 | 1 |
| C7orf65  | 237253  | 211  | 21  | 391600  | 106088 | 0 | 0 | 0 | 0 | 50 | 52  | 19936000 | 1 | 1 |
| C7orf66  | 75279   | 982  | -24 | 301176  | 79032  | 0 | 0 | 0 | 0 | 50 | 99  | 27060984 | 1 | 1 |
| C7orf68  | 902782  | 246  | 34  | 158420  | 50908  | 0 | 0 | 0 | 0 | 50 | 68  | 20282388 | 1 | 1 |
| C7orf69  | NaN     | NaN  | NaN | 326096  | 78676  | 0 | 0 | 0 | 0 | 50 | 116 | 39724260 | 1 | 1 |
| C7orf70  | NaN     | NaN  | NaN | 635460  | 201852 | 0 | 0 | 0 | 0 | 50 | 116 | 39847436 | 1 | 1 |
| C7orf71  | NaN     | NaN  | NaN | 437880  | 115344 | 0 | 0 | 0 | 0 | 50 | 116 | 39760928 | 1 | 1 |
| C7orf72  | NaN     | NaN  | NaN | 1133504 | 307228 | 0 | 0 | 0 | 0 | 50 | 116 | 39952812 | 1 | 1 |
| C8orf30A | 2713803 | 210  | 26  | 1898192 | 654328 | 0 | 0 | 0 | 0 | 12 | 12  | 5430424  | 1 | 1 |
| C8orf31  | 821065  | 470  | 4   | 349236  | 98256  | 0 | 0 | 0 | 0 | 50 | 37  | 16863364 | 1 | 1 |
| C8orf38  | 409865  | 395  | 57  | 865792  | 240656 | 0 | 0 | 0 | 0 | 50 | 66  | 21800372 | 1 | 1 |
| C8orf40  | 627586  | 464  | 26  | 291920  | 66928  | 0 | 0 | 0 | 0 | 50 | 48  | 19882244 | 1 | 1 |
| C8orf41  | 91648   | 507  | 12  | 1268072 | 392668 | 0 | 0 | 0 | 0 | 39 | 45  | 17606692 | 1 | 1 |
| C8orf42  | 152113  | 904  | -20 | 469208  | 135280 | 0 | 0 | 0 | 0 | 50 | 70  | 21670076 | 1 | 1 |
| C8orf44  | 372262  | 213  | 38  | 410468  | 110716 | 0 | 0 | 0 | 0 | 50 | 49  | 19494204 | 1 | 1 |
| C8orf45  | 392325  | 393  | 22  | 1791392 | 477040 | 0 | 0 | 0 | 0 | 11 | 5   | 3808132  | 1 | 1 |
| C8orf46  | 285889  | 151  | 36  | 528304  | 159488 | 0 | 0 | 0 | 0 | 50 | 57  | 18510932 | 1 | 1 |
| C8orf47  | 630526  | 229  | 39  | 940196  | 269848 | 0 | 0 | 0 | 0 | 22 | 26  | 11248176 | 1 | 1 |
| C8orf48  | NaN     | NaN  | NaN | 805272  | 220008 | 0 | 0 | 0 | 0 | 50 | 116 | 39865592 | 1 | 1 |
| C8orf55  | 427585  | 373  | 34  | 491280  | 182628 | 0 | 0 | 0 | 0 | 50 | 60  | 17573228 | 1 | 1 |
| C8orf73  | 2183482 | 235  | 37  | 1730160 | 634392 | 0 | 0 | 0 | 0 | 19 | 15  | 8775400  | 1 | 1 |
| C8orf79  | 111627  | 643  | -11 | 1165900 | 303668 | 0 | 0 | 0 | 0 | 50 | 54  | 24871940 | 1 | 1 |
| C8orf80  | 409228  | 222  | 34  | 2084380 | 546104 | 0 | 0 | 0 | 0 | 11 | 12  | 5138860  | 1 | 1 |
| C8orf83  | NaN     | NaN  | NaN | 233180  | 61588  | 0 | 0 | 0 | 0 | 50 | 116 | 39707172 | 1 | 1 |
| C8orf84  | 161465  | 570  | 18  | 678536  | 187612 | 0 | 0 | 0 | 0 | 50 | 42  | 17036736 | 1 | 1 |
| C8orf85  | 495171  | 346  | 16  | 388752  | 117480 | 0 | 0 | 0 | 0 | 50 | 87  | 23711736 | 1 | 1 |
| C9orf100 | 1202125 | 248  | 37  | 855112  | 255608 | 0 | 0 | 0 | 0 | 50 | 57  | 20786840 | 1 | 1 |
| C9orf102 | 260804  | 471  | 25  | 1849776 | 490212 | 0 | 0 | 0 | 0 | 22 | 17  | 8211140  | 1 | 1 |

|           |         |      |     |         |        |   |   |   |   |    |     |          |   |   |
|-----------|---------|------|-----|---------|--------|---|---|---|---|----|-----|----------|---|---|
| C9orf103  | 493702  | 567  | -8  | 367036  | 100748 | 0 | 0 | 0 | 0 | 50 | 50  | 16413736 | 1 | 1 |
| C9orf106  | 1220935 | 283  | 48  | 569956  | 182984 | 0 | 0 | 0 | 0 | 50 | 79  | 25104408 | 1 | 1 |
| C9orf11   | 116649  | 454  | -34 | 782488  | 196868 | 0 | 0 | 0 | 0 | 50 | 89  | 22655840 | 1 | 1 |
| C9orf114  | 1768145 | 201  | 34  | 983628  | 275544 | 0 | 0 | 0 | 0 | 26 | 29  | 9773980  | 1 | 1 |
| C9orf116  | 298554  | 539  | 14  | 368104  | 81524  | 0 | 0 | 0 | 0 | 50 | 72  | 20768328 | 1 | 1 |
| C9orf119  | 1813435 | 201  | 46  | 589892  | 183340 | 0 | 0 | 0 | 0 | 50 | 69  | 20850564 | 1 | 1 |
| C9orf123  | 73228   | 1033 | -33 | 278392  | 90068  | 0 | 0 | 0 | 0 | 50 | 132 | 25244672 | 1 | 1 |
| C9orf125  | 112814  | 872  | -15 | 991104  | 307584 | 0 | 0 | 0 | 0 | 50 | 76  | 29064552 | 1 | 1 |
| C9orf128  | 847663  | 227  | 54  | 1037740 | 276968 | 0 | 0 | 0 | 0 | 50 | 66  | 20654408 | 1 | 1 |
| C9orf129  | 439538  | 426  | 41  | 497332  | 150944 | 0 | 0 | 0 | 0 | 50 | 75  | 25974116 | 1 | 1 |
| C9orf135  | 243260  | 478  | -8  | 609828  | 152724 | 0 | 0 | 0 | 0 | 50 | 42  | 19534076 | 1 | 1 |
| C9orf139  | 1951939 | 202  | 40  | 458528  | 157708 | 0 | 0 | 0 | 0 | 50 | 61  | 21392396 | 1 | 1 |
| C9orf140  | 1951939 | 202  | 40  | 951588  | 335352 | 0 | 0 | 0 | 0 | 50 | 61  | 21392396 | 1 | 1 |
| C9orf144B | NaN     | NaN  | NaN | 3300832 | 992528 | 0 | 0 | 0 | 0 | 0  | 0   | 992528   | 1 | 1 |
| C9orf150  | 77482   | 482  | -32 | 570312  | 167676 | 0 | 0 | 0 | 0 | 50 | 92  | 19644080 | 1 | 1 |
| C9orf163  | 1413299 | 233  | 44  | 485228  | 168388 | 0 | 0 | 0 | 0 | 50 | 69  | 23563996 | 1 | 1 |
| C9orf167  | 1724821 | 399  | 43  | 999648  | 363120 | 0 | 0 | 0 | 0 | 50 | 60  | 16636592 | 1 | 1 |
| C9orf169  | NaN     | NaN  | NaN | 364188  | 104664 | 0 | 0 | 0 | 0 | 50 | 116 | 39750248 | 1 | 1 |
| C9orf170  | 123702  | 421  | -8  | 305804  | 91492  | 0 | 0 | 0 | 0 | 50 | 45  | 21090508 | 1 | 1 |
| C9orf173  | 1724821 | 399  | 43  | 780708  | 232824 | 0 | 0 | 0 | 0 | 50 | 60  | 16636592 | 1 | 1 |
| C9orf21   | 322237  | 430  | 26  | 580636  | 170168 | 0 | 0 | 0 | 0 | 50 | 50  | 22560076 | 1 | 1 |
| C9orf23   | 731413  | 298  | 51  | 388040  | 141688 | 0 | 0 | 0 | 0 | 50 | 42  | 16261368 | 1 | 1 |
| C9orf25   | 629612  | 302  | 40  | 490568  | 126736 | 0 | 0 | 0 | 0 | 50 | 41  | 19141052 | 1 | 1 |
| C9orf30   | 245284  | 516  | 0   | 715204  | 177644 | 0 | 0 | 0 | 0 | 50 | 52  | 19148884 | 1 | 1 |
| C9orf37   | 1197708 | 478  | 45  | 425776  | 143468 | 0 | 0 | 0 | 0 | 50 | 83  | 28003316 | 1 | 1 |
| C9orf4    | 338668  | 272  | 18  | 850840  | 271628 | 0 | 0 | 0 | 0 | 11 | 12  | 6064460  | 1 | 1 |
| C9orf46   | 373599  | 629  | 18  | 402280  | 89000  | 0 | 0 | 0 | 0 | 50 | 53  | 21135364 | 1 | 1 |
| C9orf5    | 337902  | 387  | 13  | 2212540 | 681740 | 0 | 0 | 0 | 0 | 10 | 8   | 4666448  | 1 | 1 |
| C9orf57   | NaN     | NaN  | NaN | 429692  | 108580 | 0 | 0 | 0 | 0 | 50 | 116 | 39754164 | 1 | 1 |
| C9orf6    | 337389  | 433  | 12  | 483092  | 123532 | 0 | 0 | 0 | 0 | 50 | 62  | 22004004 | 1 | 1 |
| C9orf66   | 219110  | 462  | -10 | 693844  | 254540 | 0 | 0 | 1 | 0 | 50 | 46  | 18998296 | 1 | 1 |
| C9orf68   | 226049  | 673  | 17  | 885372  | 229620 | 0 | 0 | 0 | 0 | 50 | 49  | 16026052 | 1 | 1 |
| C9orf69   | 799089  | 244  | 42  | 321824  | 118192 | 0 | 0 | 0 | 0 | 50 | 64  | 23158512 | 1 | 1 |

|          |         |      |     |         |         |   |   |   |   |    |     |          |   |   |
|----------|---------|------|-----|---------|---------|---|---|---|---|----|-----|----------|---|---|
| C9orf7   | 1858670 | 315  | 39  | 443220  | 130296  | 0 | 0 | 0 | 0 | 50 | 66  | 20649424 | 1 | 1 |
| C9orf71  | 127057  | 578  | -20 | 424352  | 129940  | 0 | 0 | 0 | 0 | 50 | 63  | 23745200 | 1 | 1 |
| C9orf79  | 206257  | 613  | 8   | 3547184 | 1102888 | 0 | 0 | 0 | 0 | 10 | 8   | 6150968  | 1 | 1 |
| C9orf80  | 525036  | 382  | 18  | 280528  | 72980   | 0 | 0 | 0 | 0 | 50 | 59  | 19929592 | 1 | 1 |
| C9orf82  | 104669  | 632  | -28 | 935568  | 245640  | 0 | 0 | 0 | 0 | 50 | 107 | 24606008 | 1 | 1 |
| C9orf86  | 1921909 | 176  | 44  | 2057324 | 603064  | 0 | 0 | 0 | 0 | 30 | 35  | 13642988 | 1 | 1 |
| C9orf89  | 504920  | 448  | 61  | 470276  | 140620  | 0 | 0 | 0 | 0 | 50 | 67  | 19457180 | 1 | 1 |
| C9orf93  | 150665  | 600  | -9  | 3499124 | 857248  | 0 | 0 | 0 | 0 | 1  | 1   | 1036316  | 1 | 1 |
| C9orf95  | 95091   | 623  | 0   | 553936  | 121040  | 0 | 0 | 0 | 0 | 50 | 45  | 21801440 | 1 | 1 |
| C9orf96  | 1827885 | 416  | 28  | 1761132 | 495552  | 0 | 0 | 0 | 0 | 0  | 0   | 495552   | 1 | 1 |
| C9orf98  | 1939494 | 575  | 33  | 1252408 | 336776  | 0 | 0 | 0 | 0 | 50 | 47  | 18980496 | 1 | 1 |
| CA13     | 99038   | 1463 | 13  | 683876  | 184408  | 0 | 0 | 0 | 0 | 0  | 0   | 184408   | 1 | 1 |
| CABC1    | 411156  | 481  | 5   | 1665724 | 470276  | 0 | 0 | 0 | 0 | 7  | 8   | 3761496  | 1 | 1 |
| CABP2    | 1392213 | 215  | 53  | 569244  | 166608  | 0 | 0 | 0 | 0 | 50 | 41  | 15455384 | 1 | 1 |
| CABP7    | 848649  | 195  | 37  | 562124  | 149164  | 0 | 0 | 1 | 0 | 50 | 54  | 19150308 | 1 | 1 |
| CALB2    | 402231  | 648  | 0   | 755076  | 161268  | 0 | 0 | 0 | 0 | 50 | 58  | 17908224 | 1 | 1 |
| CALHM3   | NaN     | NaN  | NaN | 839448  | 274476  | 0 | 0 | 0 | 0 | 50 | 116 | 39920060 | 1 | 1 |
| CALM3    | 1139694 | 347  | 28  | 409044  | 92916   | 0 | 0 | 0 | 0 | 50 | 46  | 21360712 | 1 | 1 |
| CALML4   | 375804  | 365  | 28  | 514776  | 133500  | 0 | 0 | 0 | 0 | 50 | 29  | 19439380 | 1 | 1 |
| CALML5   | 769552  | 446  | 17  | 362764  | 108224  | 0 | 0 | 1 | 0 | 15 | 16  | 4289444  | 1 | 1 |
| CAMK2N1  | 573203  | 429  | 30  | 200784  | 56604   | 0 | 0 | 0 | 0 | 50 | 55  | 21704964 | 1 | 1 |
| CAMK2N2  | NaN     | NaN  | NaN | 202564  | 58028   | 0 | 0 | 0 | 0 | 50 | 116 | 39703612 | 1 | 1 |
| CAMSAP1L | 492001  | 374  | 12  | 3809200 | 997868  | 0 | 0 | 0 | 0 | 0  | 0   | 997868   | 1 | 1 |
| CANT1    | 612708  | 177  | 22  | 1001072 | 299752  | 0 | 0 | 1 | 0 | 50 | 46  | 18646212 | 1 | 1 |
| CAPN10   | 837485  | 485  | 35  | 1804564 | 562124  | 0 | 0 | 1 | 0 | 36 | 44  | 16158840 | 1 | 1 |
| CAPN14   | NaN     | NaN  | NaN | 1818804 | 465648  | 0 | 0 | 0 | 0 | 50 | 116 | 40111232 | 1 | 1 |
| CAPN8    | NaN     | NaN  | NaN | 1566400 | 411536  | 0 | 0 | 0 | 0 | 50 | 116 | 40057120 | 1 | 1 |
| CAPNS1   | 978272  | 326  | 6   | 716272  | 191528  | 0 | 0 | 0 | 0 | 50 | 68  | 15103300 | 1 | 1 |
| CARTPT   | 456944  | 601  | 19  | 292988  | 90424   | 0 | 0 | 1 | 0 | 30 | 41  | 9147064  | 1 | 1 |
| CAV1     | 554882  | 159  | 0   | 463868  | 120328  | 0 | 0 | 0 | 0 | 50 | 58  | 17599572 | 1 | 1 |
| CAV2     | 548426  | 187  | -5  | 482024  | 89356   | 0 | 0 | 0 | 0 | 50 | 62  | 21417316 | 1 | 1 |
| CBARA1   | 473220  | 212  | 33  | 1258816 | 321824  | 0 | 0 | 0 | 0 | 50 | 61  | 19642300 | 1 | 1 |
| CBLN1    | 6672    | 907  | -33 | 480956  | 149164  | 0 | 0 | 1 | 0 | 33 | 58  | 10564300 | 1 | 1 |

|          |         |     |     |         |        |   |   |   |   |    |     |          |   |   |
|----------|---------|-----|-----|---------|--------|---|---|---|---|----|-----|----------|---|---|
| CBLN3    | 897133  | 265 | 40  | 489856  | 178712 | 0 | 0 | 0 | 0 | 50 | 54  | 25824596 | 1 | 1 |
| CBS      | 428442  | 156 | 63  | 1429340 | 407620 | 0 | 0 | 0 | 0 | 9  | 8   | 4281612  | 1 | 1 |
| CBWD6    | NaN     | NaN | NaN | 1066576 | 262016 | 0 | 0 | 0 | 0 | 50 | 116 | 39907600 | 1 | 1 |
| CBX3     | 915230  | 445 | 43  | 496620  | 114276 | 0 | 0 | 0 | 0 | 50 | 54  | 23143916 | 1 | 1 |
| CBY3     | NaN     | NaN | NaN | 595232  | 191884 | 0 | 0 | 0 | 0 | 50 | 116 | 39837468 | 1 | 1 |
| CCBP2    | 335379  | 396 | 26  | 953368  | 284444 | 0 | 0 | 0 | 0 | 50 | 45  | 26016480 | 1 | 1 |
| CCDC103  | 1101543 | 172 | 28  | 607336  | 184052 | 0 | 0 | 1 | 0 | 50 | 74  | 17295192 | 1 | 1 |
| CCDC104  | 618209  | 382 | 27  | 927380  | 212176 | 0 | 0 | 0 | 0 | 6  | 4   | 3198304  | 1 | 1 |
| CCDC105  | 990597  | 524 | 16  | 1254188 | 375580 | 0 | 0 | 1 | 0 | 10 | 15  | 3457828  | 1 | 1 |
| CCDC107  | 1202125 | 248 | 37  | 705948  | 222144 | 0 | 0 | 0 | 0 | 50 | 57  | 20786840 | 1 | 1 |
| CCDC109A | 635147  | 218 | 34  | 897832  | 262016 | 0 | 0 | 0 | 0 | 50 | 55  | 21174524 | 1 | 1 |
| CCDC11   | 211344  | 300 | 35  | 1372024 | 310076 | 0 | 0 | 0 | 0 | 50 | 59  | 18884732 | 1 | 1 |
| CCDC111  | 290265  | 471 | 30  | 1490572 | 358136 | 0 | 0 | 0 | 0 | 50 | 48  | 21442948 | 1 | 1 |
| CCDC12   | 489602  | 371 | 43  | 477396  | 127092 | 0 | 0 | 0 | 0 | 50 | 51  | 19584628 | 1 | 1 |
| CCDC122  | 139965  | 346 | 45  | 735852  | 159132 | 0 | 0 | 0 | 0 | 50 | 58  | 18845216 | 1 | 1 |
| CCDC123  | 478721  | 448 | -20 | 2063020 | 527948 | 0 | 0 | 0 | 0 | 2  | 2   | 1246000  | 1 | 1 |
| CCDC124  | 1366136 | 217 | 36  | 573872  | 160912 | 0 | 0 | 0 | 0 | 50 | 77  | 24277420 | 1 | 1 |
| CCDC135  | 712945  | 168 | 34  | 2291572 | 584552 | 0 | 0 | 0 | 0 | 37 | 30  | 15703872 | 1 | 1 |
| CCDC144E | 728759  | 435 | -5  | 1915992 | 451764 | 0 | 0 | 0 | 0 | 25 | 27  | 10843760 | 1 | 1 |
| CCDC144N | 463169  | 398 | -24 | 569244  | 154860 | 0 | 0 | 1 | 0 | 50 | 70  | 23608496 | 1 | 1 |
| CCDC147  | 281526  | 415 | 2   | 2319340 | 550376 | 0 | 0 | 0 | 0 | 6  | 7   | 3121052  | 1 | 1 |
| CCDC152  | NaN     | NaN | NaN | 708796  | 144536 | 0 | 0 | 0 | 0 | 50 | 116 | 39790120 | 1 | 1 |
| CCDC153  | 1258103 | 195 | 57  | 557140  | 148808 | 0 | 0 | 1 | 0 | 6  | 15  | 3269504  | 1 | 1 |
| CCDC154  | NaN     | NaN | NaN | 1698476 | 512284 | 0 | 0 | 0 | 0 | 9  | 16  | 4869724  | 1 | 1 |
| CCDC19   | 803074  | 403 | 7   | 1454260 | 363476 | 0 | 0 | 0 | 0 | 22 | 21  | 6788920  | 1 | 1 |
| CCDC21   | 958818  | 217 | 26  | 1969036 | 531152 | 0 | 0 | 0 | 0 | 10 | 8   | 4384140  | 1 | 1 |
| CCDC22   | 635975  | NaN | 35  | 1585980 | 494484 | 0 | 0 | 0 | 0 | 5  | 7   | 2878260  | 1 | 1 |
| CCDC41   | 181169  | 690 | 25  | 1872560 | 439660 | 0 | 0 | 0 | 0 | 50 | 131 | 45924712 | 1 | 1 |
| CCDC42B  | NaN     | NaN | NaN | 774300  | 245640 | 0 | 0 | 0 | 0 | 50 | 116 | 39891224 | 1 | 1 |
| CCDC45   | 1036796 | 184 | 8   | 2175872 | 541120 | 0 | 0 | 0 | 0 | 23 | 17  | 7927764  | 1 | 1 |
| CCDC46   | 138097  | 778 | -38 | 2714856 | 634392 | 0 | 0 | 0 | 0 | 3  | 10  | 3064448  | 1 | 1 |
| CCDC48   | 1155221 | 379 | 52  | 1461736 | 487364 | 0 | 0 | 0 | 0 | 24 | 31  | 9912108  | 1 | 1 |
| CCDC52   | 458321  | 566 | 22  | 2209336 | 603776 | 0 | 0 | 0 | 0 | 6  | 4   | 2222864  | 1 | 1 |

|          |         |     |     |         |        |   |   |   |   |    |     |          |   |   |
|----------|---------|-----|-----|---------|--------|---|---|---|---|----|-----|----------|---|---|
| CCDC53   | 234580  | 467 | 7   | 452832  | 123888 | 0 | 0 | 1 | 0 | 12 | 17  | 5692440  | 1 | 1 |
| CCDC55   | 605144  | 298 | 24  | 1488080 | 330724 | 0 | 0 | 0 | 0 | 50 | 44  | 21663312 | 1 | 1 |
| CCDC56   | 1633092 | 190 | 33  | 258100  | 91136  | 0 | 0 | 0 | 0 | 50 | 66  | 20371388 | 1 | 1 |
| CCDC58   | 475086  | 478 | 39  | 393380  | 90424  | 0 | 0 | 0 | 0 | 50 | 74  | 22270648 | 1 | 1 |
| CCDC72   | 1401411 | 263 | 32  | 185120  | 38092  | 0 | 0 | 0 | 0 | 50 | 79  | 21907884 | 1 | 1 |
| CCDC75   | 603425  | 281 | 27  | 714492  | 152724 | 0 | 0 | 0 | 0 | 50 | 57  | 19166684 | 1 | 1 |
| CCDC76   | 293698  | 518 | 8   | 1270920 | 320400 | 0 | 0 | 0 | 0 | 50 | 49  | 21769400 | 1 | 1 |
| CCDC79   | NaN     | NaN | NaN | 1943760 | 460308 | 0 | 0 | 0 | 0 | 50 | 116 | 40105892 | 1 | 1 |
| CCDC85B  | 3779084 | 287 | 42  | 480956  | 169456 | 0 | 0 | 0 | 0 | 1  | 1   | 408332   | 1 | 1 |
| CCDC85C  | NaN     | NaN | NaN | 1029196 | 337844 | 0 | 0 | 0 | 0 | 50 | 116 | 39983428 | 1 | 1 |
| CCDC9    | 1350139 | 232 | 33  | 1354580 | 396940 | 0 | 0 | 3 | 0 | 50 | 65  | 19950596 | 1 | 1 |
| CCDC90A  | 276494  | 496 | 27  | 914564  | 275188 | 0 | 0 | 0 | 0 | 50 | 45  | 18741264 | 1 | 1 |
| CCDC94   | 2132502 | 244 | 39  | 840160  | 229976 | 0 | 0 | 2 | 0 | 14 | 14  | 5282684  | 1 | 1 |
| CCDC99   | 96768   | 495 | 19  | 1599864 | 388752 | 0 | 0 | 0 | 0 | 50 | 42  | 20180216 | 1 | 1 |
| CCK      | 338797  | 473 | 29  | 288360  | 91848  | 0 | 0 | 0 | 0 | 50 | 46  | 21775452 | 1 | 1 |
| CCL1     | 40425   | 871 | -32 | 256676  | 64792  | 0 | 0 | 0 | 0 | 50 | 85  | 19967328 | 1 | 1 |
| CCL11    | 40425   | 871 | -32 | 251692  | 70844  | 0 | 0 | 0 | 0 | 50 | 85  | 19967328 | 1 | 1 |
| CCL17    | 749108  | 159 | 39  | 246708  | 70488  | 0 | 0 | 0 | 0 | 50 | 52  | 18373516 | 1 | 1 |
| CCL18    | 779228  | 525 | 19  | 236384  | 62656  | 0 | 0 | 0 | 0 | 50 | 69  | 21358220 | 1 | 1 |
| CCL19    | 731413  | 298 | 51  | 254184  | 75828  | 0 | 0 | 0 | 0 | 50 | 42  | 16261368 | 1 | 1 |
| CCL24    | 1013258 | 255 | 46  | 306872  | 84016  | 0 | 0 | 0 | 0 | 50 | 61  | 24609568 | 1 | 1 |
| CCL25    | 954819  | 369 | 13  | 394448  | 106444 | 0 | 0 | 0 | 0 | 50 | 71  | 15374572 | 1 | 1 |
| CCL3L1   | NaN     | NaN | NaN | 496976  | 131008 | 0 | 0 | 0 | 0 | 50 | 116 | 39776592 | 1 | 1 |
| CCL4     | 744143  | 565 | 28  | 242080  | 66572  | 0 | 0 | 0 | 0 | 50 | 68  | 23933524 | 1 | 1 |
| CCL4L1   | NaN     | NaN | NaN | 479888  | 137416 | 0 | 0 | 0 | 0 | 50 | 116 | 39783000 | 1 | 1 |
| CCL4L2   | 691971  | 684 | 13  | 479888  | 137416 | 0 | 0 | 0 | 0 | 50 | 57  | 20760140 | 1 | 1 |
| CCL8     | 40425   | 871 | -32 | 260236  | 68708  | 0 | 0 | 1 | 0 | 9  | 9   | 2480608  | 1 | 1 |
| CCNB1IP1 | 393743  | 401 | -18 | 715560  | 187968 | 0 | 0 | 1 | 0 | 50 | 45  | 19157784 | 1 | 1 |
| CCR6     | 149346  | 696 | 40  | 941620  | 268424 | 0 | 0 | 1 | 0 | 50 | 68  | 21350744 | 1 | 1 |
| CCRL1    | 210898  | 768 | 21  | 883948  | 244928 | 0 | 0 | 0 | 0 | 50 | 58  | 22555804 | 1 | 1 |
| CCT4     | 688730  | 226 | 34  | 1377720 | 407976 | 0 | 0 | 1 | 0 | 50 | 51  | 20523044 | 1 | 1 |
| CD151    | 1799017 | 232 | 51  | 658244  | 185476 | 0 | 0 | 1 | 0 | 50 | 57  | 18763692 | 1 | 1 |
| CD24     | NaN     | NaN | NaN | 185832  | 73692  | 0 | 0 | 0 | 0 | 50 | 116 | 39719276 | 1 | 1 |

|          |         |     |     |         |        |   |   |   |   |    |     |          |   |   |
|----------|---------|-----|-----|---------|--------|---|---|---|---|----|-----|----------|---|---|
| CD302    | 361333  | 405 | 34  | 618728  | 151300 | 0 | 0 | 0 | 0 | 50 | 40  | 19566116 | 1 | 1 |
| CD320    | 778783  | 209 | 14  | 696692  | 229264 | 0 | 0 | 0 | 0 | 50 | 66  | 22945268 | 1 | 1 |
| CD3D     | 963668  | 192 | 48  | 442152  | 128160 | 0 | 0 | 0 | 0 | 21 | 25  | 8075148  | 1 | 1 |
| CD59     | 755929  | 424 | 15  | 337488  | 88644  | 0 | 0 | 0 | 0 | 50 | 60  | 19185196 | 1 | 1 |
| CD69     | 226318  | 648 | 33  | 533644  | 126380 | 0 | 0 | 1 | 0 | 18 | 26  | 5237472  | 1 | 1 |
| CD8B     | 330931  | 543 | 19  | 803848  | 190460 | 0 | 0 | 0 | 0 | 50 | 55  | 23650504 | 1 | 1 |
| CD97     | 996589  | 183 | 32  | 2154512 | 605200 | 0 | 0 | 0 | 0 | 4  | 6   | 2810620  | 1 | 1 |
| CDA      | 631461  | 208 | 35  | 381276  | 102528 | 0 | 0 | 1 | 0 | 6  | 8   | 3603076  | 1 | 1 |
| CDC26    | 426351  | 312 | 26  | 225348  | 58740  | 0 | 0 | 0 | 0 | 37 | 41  | 12733408 | 1 | 1 |
| CDC42EP1 | 991778  | 176 | 51  | 933788  | 326452 | 0 | 0 | 0 | 0 | 40 | 48  | 15032456 | 1 | 1 |
| CDC42EP2 | 3946871 | 242 | 49  | 505876  | 170168 | 0 | 0 | 0 | 0 | 27 | 30  | 12483852 | 1 | 1 |
| CDC42EP3 | 477159  | 404 | 31  | 632612  | 184408 | 0 | 0 | 3 | 0 | 7  | 5   | 1248492  | 1 | 1 |
| CDC42EP5 | NaN     | NaN | NaN | 347456  | 134212 | 0 | 0 | 0 | 0 | 50 | 116 | 39779796 | 1 | 1 |
| CDC42SE2 | 313468  | 414 | 34  | 230688  | 54468  | 0 | 0 | 0 | 0 | 50 | 34  | 18270276 | 1 | 1 |
| CDHR4    | 1306720 | 191 | 39  | 2007840 | 601284 | 0 | 0 | 0 | 0 | 5  | 7   | 2686376  | 1 | 1 |
| CDK1     | 109701  | 396 | -21 | 790676  | 204700 | 0 | 0 | 1 | 0 | 50 | 42  | 17725596 | 1 | 1 |
| CDK2AP1  | 1014179 | 201 | 29  | 299396  | 85084  | 0 | 0 | 0 | 0 | 50 | 76  | 21287376 | 1 | 1 |
| CDKN1C   | 552601  | 256 | 34  | 752228  | 280528 | 0 | 0 | 0 | 0 | 50 | 59  | 21410552 | 1 | 1 |
| CDRT15   | 96214   | 975 | -61 | 462444  | 149520 | 0 | 0 | 0 | 0 | 33 | 27  | 10757964 | 1 | 1 |
| CDV3     | 391516  | 327 | 36  | 682096  | 184052 | 0 | 0 | 0 | 0 | 50 | 52  | 21749108 | 1 | 1 |
| CDX1     | 1002307 | 228 | 49  | 644360  | 218584 | 0 | 0 | 0 | 0 | 50 | 53  | 19888652 | 1 | 1 |
| CDX2     | 309835  | 614 | 47  | 766468  | 248132 | 0 | 0 | 1 | 0 | 50 | 55  | 18324388 | 1 | 1 |
| CDX4     | 221528  | NaN | -13 | 714492  | 206124 | 0 | 0 | 0 | 0 | 50 | 44  | 16162400 | 1 | 1 |
| CDY1     | NaN     | NaN | NaN | 2839456 | 787472 | 0 | 0 | 0 | 0 | 7  | 14  | 4475632  | 1 | 1 |
| CDY1B    | NaN     | NaN | NaN | 2839456 | 787472 | 0 | 0 | 0 | 0 | 7  | 14  | 4475632  | 1 | 1 |
| CDY2A    | NaN     | NaN | NaN | 2726248 | 755432 | 0 | 0 | 0 | 0 | 7  | 14  | 4443592  | 1 | 1 |
| CDY2B    | NaN     | NaN | NaN | 2726248 | 755432 | 0 | 0 | 0 | 0 | 7  | 14  | 4443592  | 1 | 1 |
| CEACAM1  | 812266  | 188 | -22 | 1045572 | 344964 | 0 | 0 | 0 | 0 | 8  | 17  | 4475632  | 1 | 1 |
| CEACAM2  | 761897  | 511 | -61 | 1513000 | 452120 | 0 | 0 | 1 | 0 | 19 | 80  | 19760136 | 1 | 1 |
| CEBPD    | 918236  | 460 | 15  | 646496  | 220720 | 0 | 0 | 0 | 0 | 3  | 1   | 690996   | 1 | 1 |
| CEBPE    | 1261207 | 185 | 41  | 684944  | 222856 | 0 | 0 | 3 | 0 | 0  | 3   | 222856   | 1 | 1 |
| CENPBD1  | 1056657 | 221 | 35  | 472412  | 129940 | 0 | 0 | 1 | 0 | 20 | 22  | 5927400  | 1 | 1 |
| CENPC1   | 128864  | 689 | 7   | 2482032 | 619440 | 0 | 0 | 0 | 0 | 22 | 33  | 14099380 | 1 | 1 |

|        |         |     |     |         |         |   |   |   |   |    |     |          |   |   |
|--------|---------|-----|-----|---------|---------|---|---|---|---|----|-----|----------|---|---|
| CENPM  | 1335011 | 323 | 67  | 497688  | 148452  | 0 | 0 | 1 | 0 | 50 | 49  | 15999352 | 1 | 1 |
| CENPV  | 881521  | 169 | 4   | 684588  | 209328  | 0 | 0 | 0 | 0 | 50 | 44  | 16627336 | 1 | 1 |
| CENPW  | 142596  | 704 | -1  | 227128  | 66572   | 0 | 0 | 0 | 0 | 50 | 58  | 21173100 | 1 | 1 |
| CEP110 | 610711  | 365 | 34  | 6129964 | 1499828 | 0 | 0 | 0 | 0 | 13 | 7   | 8569632  | 1 | 1 |
| CES7   | 348857  | 581 | -30 | 1612324 | 461732  | 0 | 0 | 0 | 0 | 26 | 34  | 11173772 | 1 | 1 |
| CES8   | 1044004 | 135 | 48  | 1536496 | 406196  | 0 | 0 | 0 | 0 | 24 | 17  | 9327912  | 1 | 1 |
| CFB    | 2314693 | 203 | 34  | 2002144 | 525812  | 0 | 0 | 0 | 0 | 22 | 25  | 13143520 | 1 | 1 |
| CFC1   | NaN     | NaN | NaN | 1137064 | 345320  | 0 | 0 | 0 | 0 | 50 | 116 | 39990904 | 1 | 1 |
| CFC1B  | 569565  | NaN | 12  | 1137064 | 345320  | 0 | 0 | 0 | 0 | 22 | 24  | 9259204  | 1 | 1 |
| CFD    | 2168802 | 198 | 28  | 623356  | 209684  | 0 | 0 | 0 | 0 | 50 | 73  | 22578944 | 1 | 1 |
| CFDP1  | 507054  | 133 | 17  | 799576  | 187256  | 0 | 0 | 0 | 0 | 50 | 43  | 20298408 | 1 | 1 |
| CGB    | 2070141 | 200 | 35  | 404416  | 138128  | 0 | 0 | 1 | 0 | 12 | 19  | 4170896  | 1 | 1 |
| CGB1   | 2070141 | 200 | 35  | 380208  | 130296  | 0 | 0 | 0 | 0 | 50 | 68  | 18142828 | 1 | 1 |
| CGB2   | 2070141 | 200 | 35  | 396940  | 139196  | 0 | 0 | 0 | 0 | 50 | 68  | 18142828 | 1 | 1 |
| CGB7   | 2070141 | 200 | 35  | 404416  | 138128  | 0 | 0 | 1 | 0 | 12 | 19  | 4170896  | 1 | 1 |
| CGREF1 | 1214097 | 238 | 50  | 1014600 | 307584  | 0 | 0 | 1 | 0 | 50 | 60  | 22743060 | 1 | 1 |
| CHAC1  | 1049616 | 176 | 50  | 651124  | 208616  | 0 | 0 | 2 | 0 | 27 | 42  | 10668252 | 1 | 1 |
| CHADL  | NaN     | NaN | NaN | 1839096 | 689928  | 0 | 0 | 0 | 0 | 7  | 14  | 4378088  | 1 | 1 |
| CHCHD4 | 312564  | 463 | 27  | 432896  | 101104  | 0 | 0 | 0 | 0 | 50 | 51  | 19996876 | 1 | 1 |
| CHCHD5 | 590285  | 166 | 36  | 288360  | 80100   | 0 | 0 | 0 | 0 | 50 | 42  | 19807840 | 1 | 1 |
| CHCHD6 | 250457  | 604 | 39  | 619440  | 168744  | 0 | 0 | 1 | 0 | 28 | 30  | 10153476 | 1 | 1 |
| CHCHD8 | 555075  | 214 | 47  | 229620  | 56604   | 0 | 0 | 0 | 0 | 50 | 56  | 20095488 | 1 | 1 |
| CHIC1  | 319167  | NaN | 11  | 590604  | 151656  | 0 | 0 | 0 | 0 | 50 | 64  | 23168124 | 1 | 1 |
| CHIC2  | 92904   | 472 | 19  | 446780  | 106444  | 0 | 0 | 0 | 0 | 50 | 43  | 19076260 | 1 | 1 |
| CHMP1A | 1090549 | 219 | 38  | 762908  | 56248   | 0 | 0 | 0 | 0 | 50 | 51  | 16551864 | 1 | 1 |
| CHMP4A | 974559  | 220 | 41  | 692064  | 181560  | 0 | 0 | 0 | 0 | 50 | 62  | 24565780 | 1 | 1 |
| CHP    | 956634  | 214 | 44  | 522608  | 131008  | 0 | 0 | 0 | 0 | 25 | 25  | 11307628 | 1 | 1 |
| CHRNA7 | 199973  | 778 | -9  | 1291568 | 360628  | 0 | 0 | 0 | 0 | 32 | 25  | 12483496 | 1 | 1 |
| CHST10 | 226558  | 642 | 9   | 924176  | 241012  | 0 | 0 | 1 | 0 | 50 | 59  | 23206572 | 1 | 1 |
| CHST2  | 319752  | 591 | 25  | 1260240 | 441084  | 0 | 0 | 0 | 0 | 32 | 53  | 21609556 | 1 | 1 |
| CHST3  | 762207  | 169 | 54  | 1176580 | 365612  | 0 | 0 | 2 | 0 | 50 | 92  | 21141416 | 1 | 1 |
| CIDEC  | 950574  | 170 | 54  | 606268  | 180848  | 0 | 0 | 0 | 0 | 50 | 71  | 20154584 | 1 | 1 |
| CISD1  | 153256  | 357 | -17 | 286580  | 71200   | 0 | 0 | 0 | 0 | 50 | 46  | 21905748 | 1 | 1 |

|         |         |     |     |         |        |   |   |   |   |    |     |          |   |   |
|---------|---------|-----|-----|---------|--------|---|---|---|---|----|-----|----------|---|---|
| CISD2   | 373094  | 471 | 33  | 368816  | 75472  | 0 | 0 | 0 | 0 | 50 | 42  | 18599220 | 1 | 1 |
| CISD3   | NaN     | NaN | NaN | 325384  | 99680  | 0 | 0 | 0 | 0 | 50 | 116 | 39745264 | 1 | 1 |
| CITED1  | 370863  | NaN | 50  | 543256  | 172304 | 0 | 0 | 0 | 0 | 50 | 63  | 22275632 | 1 | 1 |
| CITED4  | NaN     | NaN | NaN | 426132  | 166608 | 0 | 0 | 0 | 0 | 50 | 116 | 39812192 | 1 | 1 |
| CKLF    | 688682  | 214 | -1  | 401568  | 115344 | 0 | 0 | 0 | 0 | 50 | 64  | 21771180 | 1 | 1 |
| CKMT1A  | 774279  | 286 | 51  | 1048776 | 324672 | 0 | 0 | 0 | 0 | 21 | 17  | 5977596  | 1 | 1 |
| CKS1B   | 1612870 | 224 | 35  | 216804  | 48060  | 0 | 0 | 1 | 0 | 2  | 5   | 590248   | 1 | 1 |
| CLCC1   | 880200  | 216 | 19  | 1442868 | 375936 | 0 | 0 | 0 | 0 | 22 | 20  | 9174832  | 1 | 1 |
| CLDN20  | NaN     | NaN | NaN | 536848  | 168032 | 0 | 0 | 0 | 0 | 50 | 116 | 39813616 | 1 | 1 |
| CLDN24  | NaN     | NaN | NaN | 538984  | 166964 | 0 | 0 | 0 | 0 | 50 | 116 | 39812548 | 1 | 1 |
| CLDN8   | 10231   | 994 | -69 | 560700  | 163404 | 0 | 0 | 0 | 0 | 18 | 26  | 5070864  | 1 | 1 |
| CLDND2  | 368509  | 610 | -9  | 427200  | 126024 | 0 | 0 | 0 | 0 | 50 | 39  | 14321524 | 1 | 1 |
| CLEC12B | 305376  | 565 | 19  | 747600  | 179424 | 0 | 0 | 0 | 0 | 50 | 34  | 26162796 | 1 | 1 |
| CLEC18A | 1511555 | 162 | 36  | 1165188 | 313992 | 0 | 0 | 0 | 0 | 8  | 23  | 5592048  | 1 | 1 |
| CLEC18C | 1353954 | 139 | 37  | 1165544 | 313636 | 0 | 0 | 0 | 0 | 50 | 63  | 21892220 | 1 | 1 |
| CLEC2A  | NaN     | NaN | NaN | 473124  | 106800 | 0 | 0 | 0 | 0 | 50 | 116 | 39752384 | 1 | 1 |
| CLEC2L  | 557910  | 522 | 32  | 541832  | 164116 | 0 | 0 | 0 | 0 | 50 | 98  | 28041408 | 1 | 1 |
| CLECL1  | 251092  | 648 | 8   | 433252  | 109292 | 0 | 0 | 1 | 0 | 19 | 24  | 7035628  | 1 | 1 |
| CLPS    | 621095  | 404 | 34  | 291564  | 81168  | 0 | 0 | 0 | 0 | 50 | 56  | 22245372 | 1 | 1 |
| CMA1    | 898202  | 411 | 17  | 627272  | 188680 | 0 | 0 | 2 | 0 | 1  | 2   | 429336   | 1 | 1 |
| CMC1    | 84882   | 793 | 10  | 291564  | 64080  | 0 | 0 | 0 | 0 | 50 | 61  | 22171680 | 1 | 1 |
| CMTM3   | 777342  | 214 | 9   | 466004  | 141688 | 0 | 0 | 0 | 0 | 50 | 68  | 21478904 | 1 | 1 |
| CMTM4   | 790767  | 145 | 9   | 597368  | 174796 | 0 | 0 | 1 | 0 | 50 | 59  | 21196952 | 1 | 1 |
| CMTM8   | 306655  | 590 | 11  | 441440  | 128872 | 0 | 0 | 0 | 0 | 50 | 66  | 21077336 | 1 | 1 |
| CNGA4   | 466636  | 728 | 4   | 1439664 | 429336 | 0 | 0 | 1 | 0 | 50 | 57  | 22924620 | 1 | 1 |
| CNIH    | 399536  | 371 | 17  | 386616  | 96120  | 0 | 0 | 0 | 0 | 50 | 69  | 21693572 | 1 | 1 |
| CNN3    | 282666  | 333 | -6  | 863300  | 219652 | 0 | 0 | 1 | 0 | 23 | 23  | 10227880 | 1 | 1 |
| CNO     | 501020  | 201 | 62  | 529728  | 170880 | 0 | 0 | 0 | 0 | 43 | 51  | 15731284 | 1 | 1 |
| CNOT7   | 237338  | 387 | 4   | 760416  | 185832 | 0 | 0 | 1 | 0 | 50 | 39  | 20285948 | 1 | 1 |
| CNPY1   | 267612  | 599 | -5  | 255608  | 55180  | 0 | 0 | 0 | 0 | 50 | 61  | 19878684 | 1 | 1 |
| CNPY3   | 1143209 | 203 | 41  | 717340  | 197936 | 0 | 0 | 0 | 0 | 50 | 59  | 17728800 | 1 | 1 |
| CNRIP1  | 204433  | 586 | 15  | 468496  | 131720 | 0 | 0 | 0 | 0 | 50 | 47  | 17734140 | 1 | 1 |
| CNTD1   | 1633092 | 190 | 33  | 840516  | 245640 | 0 | 0 | 0 | 0 | 24 | 22  | 8134244  | 1 | 1 |



|         |         |     |     |         |        |   |   |   |   |    |     |          |   |   |
|---------|---------|-----|-----|---------|--------|---|---|---|---|----|-----|----------|---|---|
| COBRA1  | 1724821 | 399 | 43  | 1468500 | 444288 | 0 | 0 | 0 | 0 | 18 | 19  | 5825228  | 1 | 1 |
| COLEC10 | 180181  | 380 | 2   | 729800  | 184408 | 0 | 0 | 0 | 0 | 50 | 44  | 24256416 | 1 | 1 |
| COMMD10 | 312789  | 981 | 8   | 537560  | 140620 | 0 | 0 | 0 | 0 | 50 | 53  | 20400224 | 1 | 1 |
| COMMD3  | 195915  | 462 | 23  | 524744  | 135280 | 0 | 0 | 0 | 0 | 50 | 54  | 17596724 | 1 | 1 |
| COMMD4  | 814680  | 296 | 43  | 521896  | 150944 | 0 | 0 | 1 | 0 | 50 | 63  | 19824928 | 1 | 1 |
| COMMD7  | 661510  | 132 | 45  | 546816  | 131364 | 0 | 0 | 2 | 0 | 6  | 7   | 1361700  | 1 | 1 |
| COMMD8  | 87789   | 528 | 23  | 486296  | 122464 | 0 | 0 | 0 | 0 | 50 | 46  | 20065584 | 1 | 1 |
| COPG    | 1119201 | 189 | 55  | 2286588 | 617304 | 0 | 0 | 0 | 0 | 3  | 0   | 2294420  | 1 | 1 |
| COPG2   | 298918  | 433 | 16  | 1071916 | 270560 | 0 | 0 | 0 | 0 | 7  | 6   | 4045584  | 1 | 1 |
| COPS6   | 1503181 | 254 | 41  | 862944  | 228552 | 0 | 0 | 2 | 0 | 21 | 30  | 10491676 | 1 | 1 |
| COPZ1   | 664708  | 190 | 45  | 483448  | 123176 | 0 | 0 | 1 | 0 | 50 | 62  | 22308028 | 1 | 1 |
| COQ7    | 861035  | 199 | 8   | 564616  | 157352 | 0 | 0 | 0 | 0 | 50 | 60  | 19206200 | 1 | 1 |
| CORT    | 829921  | 392 | 32  | 386616  | 117480 | 0 | 0 | 0 | 0 | 50 | 57  | 23206928 | 1 | 1 |
| COX16   | 500896  | 549 | 32  | 284800  | 70844  | 0 | 0 | 1 | 0 | 9  | 9   | 1606272  | 1 | 1 |
| COX19   | 765060  | 346 | 34  | 251336  | 50908  | 0 | 0 | 0 | 0 | 50 | 53  | 20860888 | 1 | 1 |
| COX4I1  | 381135  | 298 | 28  | 454612  | 106088 | 0 | 0 | 0 | 0 | 50 | 64  | 24463608 | 1 | 1 |
| COX4I2  | 837796  | 213 | 18  | 455680  | 112496 | 0 | 0 | 0 | 0 | 50 | 55  | 18907516 | 1 | 1 |
| COX4NB  | 381135  | 298 | 28  | 545392  | 147740 | 0 | 0 | 0 | 0 | 50 | 64  | 24463608 | 1 | 1 |
| COX5B   | 362146  | 520 | 25  | 334996  | 98612  | 0 | 0 | 1 | 0 | 1  | 2   | 379852   | 1 | 1 |
| COX6A2  | 839076  | 558 | 11  | 248132  | 78676  | 0 | 0 | 0 | 0 | 50 | 75  | 22592472 | 1 | 1 |
| COX6B1  | 1162794 | 390 | 27  | 239588  | 51976  | 0 | 0 | 0 | 0 | 50 | 66  | 20625572 | 1 | 1 |
| COX6B2  | 1028808 | 209 | 19  | 243148  | 54824  | 0 | 0 | 0 | 0 | 50 | 60  | 18195872 | 1 | 1 |
| COX7A1  | 978272  | 326 | 6   | 212888  | 58384  | 0 | 0 | 0 | 0 | 50 | 68  | 15103300 | 1 | 1 |
| COX7C   | 84088   | 829 | -14 | 169456  | 46280  | 0 | 0 | 0 | 0 | 7  | 8   | 2503392  | 1 | 1 |
| COX8A   | 1322584 | 277 | 42  | 167676  | 63012  | 0 | 0 | 0 | 0 | 50 | 83  | 26795052 | 1 | 1 |
| COX8C   | NaN     | NaN | NaN | 177288  | 63012  | 0 | 0 | 0 | 0 | 50 | 116 | 39708596 | 1 | 1 |
| CP110   | 349996  | 491 | 21  | 2577796 | 656108 | 0 | 0 | 0 | 0 | 12 | 10  | 5660756  | 1 | 1 |
| CPLX2   | 473039  | 624 | 32  | 358492  | 86864  | 0 | 0 | 0 | 0 | 50 | 71  | 25529472 | 1 | 1 |
| CPLX4   | 293564  | 549 | 20  | 431472  | 92916  | 0 | 0 | 0 | 0 | 42 | 44  | 18840944 | 1 | 1 |
| CPNE5   | 844979  | 244 | 43  | 1570316 | 420436 | 0 | 0 | 1 | 0 | 50 | 60  | 23128964 | 1 | 1 |
| CPPED1  | 75434   | 797 | -3  | 804560  | 217516 | 0 | 0 | 1 | 0 | 48 | 51  | 18537276 | 1 | 1 |
| CPSF4L  | NaN     | NaN | NaN | 491280  | 111072 | 0 | 0 | 0 | 0 | 50 | 116 | 39756656 | 1 | 1 |
| CRB3    | 865106  | 219 | 33  | 356000  | 123532 | 0 | 0 | 0 | 0 | 50 | 76  | 20954160 | 1 | 1 |

|         |         |      |     |         |         |   |   |   |   |    |     |          |   |   |
|---------|---------|------|-----|---------|---------|---|---|---|---|----|-----|----------|---|---|
| CREB1   | 184506  | 198  | 25  | 873624  | 256320  | 0 | 0 | 0 | 0 | 50 | 47  | 19904316 | 1 | 1 |
| CREB3L1 | 801520  | 158  | 36  | 1326812 | 386260  | 0 | 0 | 1 | 0 | 50 | 45  | 19214032 | 1 | 1 |
| CRELD2  | 842221  | 271  | 15  | 1055540 | 278392  | 0 | 0 | 1 | 0 | 50 | 69  | 23287384 | 1 | 1 |
| CRH     | 277437  | 480  | 30  | 470276  | 165184  | 0 | 0 | 2 | 0 | 6  | 10  | 2710940  | 1 | 1 |
| CRHBP   | 245514  | 418  | 17  | 832684  | 227840  | 0 | 0 | 1 | 0 | 50 | 48  | 20406988 | 1 | 1 |
| CRIP1   | 689089  | 298  | 41  | 221076  | 50196   | 0 | 0 | 0 | 0 | 50 | 46  | 21105816 | 1 | 1 |
| CRISP2  | 67596   | 1248 | -6  | 653260  | 158420  | 0 | 0 | 1 | 0 | 50 | 43  | 17490992 | 1 | 1 |
| CRKL    | 523674  | 192  | 49  | 754008  | 228552  | 0 | 0 | 1 | 0 | 50 | 50  | 19418376 | 1 | 1 |
| CRTAP   | 513008  | 372  | 33  | 1035604 | 278036  | 0 | 0 | 0 | 0 | 50 | 53  | 21203360 | 1 | 1 |
| CRYAA   | 687433  | 279  | 59  | 435388  | 132788  | 0 | 0 | 0 | 0 | 50 | 52  | 19003280 | 1 | 1 |
| CRYAB   | 437513  | 221  | 22  | 442864  | 131720  | 0 | 0 | 0 | 0 | 50 | 49  | 18660452 | 1 | 1 |
| CRYBB3  | 247839  | 525  | -31 | 555360  | 145248  | 0 | 0 | 1 | 0 | 50 | 85  | 21194816 | 1 | 1 |
| CRYGA   | 321897  | 440  | 5   | 453544  | 119972  | 0 | 0 | 0 | 0 | 50 | 50  | 16889352 | 1 | 1 |
| CRYGC   | 327858  | 440  | 13  | 453900  | 119616  | 0 | 0 | 0 | 0 | 50 | 63  | 21332232 | 1 | 1 |
| CSAG2   | NaN     | NaN  | NaN | 650768  | 182272  | 0 | 0 | 0 | 0 | 50 | 116 | 39827856 | 1 | 1 |
| CSAG3   | 202421  | NaN  | -2  | 650768  | 182272  | 0 | 0 | 0 | 0 | 44 | 50  | 16755496 | 1 | 1 |
| CSDA    | 410051  | 455  | -4  | 939484  | 294056  | 0 | 0 | 0 | 0 | 50 | 83  | 25154248 | 1 | 1 |
| CSDC2   | 1467336 | 183  | 66  | 380564  | 121396  | 0 | 0 | 0 | 0 | 50 | 56  | 20734864 | 1 | 1 |
| CSF2    | 362855  | 407  | 21  | 375936  | 103596  | 0 | 0 | 0 | 0 | 50 | 41  | 21683248 | 1 | 1 |
| CSNK2A2 | 862670  | 292  | 15  | 938772  | 232824  | 0 | 0 | 1 | 0 | 36 | 57  | 15421564 | 1 | 1 |
| CSNK2B  | 2517236 | 193  | 20  | 581348  | 136348  | 0 | 0 | 0 | 0 | 50 | 63  | 27465044 | 1 | 1 |
| CST3    | 189028  | 819  | -21 | 366324  | 115344  | 0 | 0 | 0 | 0 | 50 | 70  | 17124312 | 1 | 1 |
| CST6    | 3854361 | 208  | 57  | 377004  | 114276  | 0 | 0 | 0 | 0 | 29 | 35  | 13479584 | 1 | 1 |
| CT45A1  | NaN     | NaN  | NaN | 499468  | 126380  | 0 | 0 | 0 | 0 | 50 | 116 | 39771964 | 1 | 1 |
| CT45A2  | NaN     | NaN  | NaN | 501248  | 124600  | 0 | 0 | 0 | 0 | 50 | 116 | 39770184 | 1 | 1 |
| CT45A3  | NaN     | NaN  | NaN | 500180  | 125668  | 0 | 0 | 0 | 0 | 50 | 116 | 39771252 | 1 | 1 |
| CT45A4  | NaN     | NaN  | NaN | 1001784 | 249912  | 0 | 0 | 0 | 0 | 50 | 116 | 39895496 | 1 | 1 |
| CT45A5  | 246199  | NaN  | 26  | 500892  | 124956  | 0 | 0 | 0 | 0 | 50 | 66  | 25385292 | 1 | 1 |
| CT45A6  | NaN     | NaN  | NaN | 500536  | 125312  | 0 | 0 | 0 | 0 | 50 | 116 | 39770896 | 1 | 1 |
| CT47A1  | NaN     | NaN  | NaN | 7116440 | 2228560 | 0 | 0 | 0 | 0 | 0  | 0   | 2228560  | 1 | 1 |
| CT47A10 | NaN     | NaN  | NaN | 6404796 | 2005704 | 0 | 0 | 0 | 0 | 0  | 0   | 2005704  | 1 | 1 |
| CT47A11 | NaN     | NaN  | NaN | 6404796 | 2005704 | 0 | 0 | 0 | 0 | 0  | 0   | 2005704  | 1 | 1 |
| CT47A2  | NaN     | NaN  | NaN | 6404796 | 2005704 | 0 | 0 | 0 | 0 | 0  | 0   | 2005704  | 1 | 1 |

|          |         |     |     |         |         |   |   |   |   |    |     |          |   |   |
|----------|---------|-----|-----|---------|---------|---|---|---|---|----|-----|----------|---|---|
| CT47A3   | NaN     | NaN | NaN | 6404796 | 2005704 | 0 | 0 | 0 | 0 | 0  | 0   | 2005704  | 1 | 1 |
| CT47A4   | NaN     | NaN | NaN | 6404796 | 2005704 | 0 | 0 | 0 | 0 | 0  | 0   | 2005704  | 1 | 1 |
| CT47A5   | NaN     | NaN | NaN | 6404796 | 2005704 | 0 | 0 | 0 | 0 | 0  | 0   | 2005704  | 1 | 1 |
| CT47A6   | NaN     | NaN | NaN | 7116440 | 2228560 | 0 | 0 | 0 | 0 | 0  | 0   | 2228560  | 1 | 1 |
| CT47A7   | NaN     | NaN | NaN | 711644  | 222856  | 0 | 0 | 0 | 0 | 50 | 116 | 39868440 | 1 | 1 |
| CT47A8   | NaN     | NaN | NaN | 6404796 | 2005704 | 0 | 0 | 0 | 0 | 0  | 0   | 2005704  | 1 | 1 |
| CT47A9   | NaN     | NaN | NaN | 6404796 | 2005704 | 0 | 0 | 0 | 0 | 0  | 0   | 2005704  | 1 | 1 |
| CT62     | 276800  | 462 | 10  | 348168  | 99324   | 0 | 0 | 0 | 0 | 50 | 45  | 22716716 | 1 | 1 |
| CTAG1A   | NaN     | NaN | NaN | 866504  | 314704  | 0 | 0 | 0 | 0 | 50 | 116 | 39960288 | 1 | 1 |
| CTAG1B   | NaN     | NaN | NaN | 866504  | 314704  | 0 | 0 | 0 | 0 | 50 | 116 | 39960288 | 1 | 1 |
| CTAGE5   | 314800  | 300 | 16  | 2163056 | 545392  | 0 | 0 | 0 | 0 | 21 | 20  | 9386652  | 1 | 1 |
| CTAGE6P  | 453170  | 544 | -7  | 1955508 | 539340  | 0 | 0 | 0 | 0 | 2  | 3   | 1217520  | 1 | 1 |
| CTNNBIP1 | 770684  | 193 | 34  | 218228  | 57316   | 0 | 0 | 0 | 0 | 50 | 47  | 19426208 | 1 | 1 |
| CTPS     | 341851  | 171 | 29  | 1562484 | 411180  | 0 | 0 | 0 | 0 | 17 | 21  | 9135316  | 1 | 1 |
| CTRB1    | 612638  | 171 | 16  | 673196  | 202564  | 0 | 0 | 0 | 0 | 50 | 41  | 19443652 | 1 | 1 |
| CTSH     | 421272  | 488 | 45  | 902104  | 223568  | 0 | 0 | 3 | 0 | 1  | 4   | 432540   | 1 | 1 |
| CTSL1    | 122983  | 577 | 26  | 885016  | 215024  | 0 | 0 | 0 | 0 | 50 | 39  | 19738776 | 1 | 1 |
| CTSL2    | 339842  | 464 | 24  | 884660  | 218584  | 0 | 0 | 0 | 0 | 28 | 45  | 15439720 | 1 | 1 |
| CTSS     | 1818753 | 188 | 35  | 868996  | 223568  | 0 | 0 | 2 | 0 | 30 | 59  | 12923512 | 1 | 1 |
| CTU2     | 802673  | 189 | 41  | 1330016 | 387328  | 0 | 0 | 1 | 0 | 50 | 65  | 20750172 | 1 | 1 |
| CTXN2    | NaN     | NaN | NaN | 210752  | 56248   | 0 | 0 | 0 | 0 | 50 | 116 | 39701832 | 1 | 1 |
| CWC25    | 1198833 | 207 | 37  | 1120688 | 282664  | 0 | 0 | 0 | 0 | 50 | 46  | 18180920 | 1 | 1 |
| CXCL12   | 33976   | 922 | -34 | 466004  | 126736  | 0 | 0 | 0 | 0 | 50 | 89  | 19323680 | 1 | 1 |
| CXCL3    | 199590  | 368 | 13  | 272696  | 86152   | 0 | 0 | 0 | 0 | 50 | 60  | 21369968 | 1 | 1 |
| CXCR1    | 718028  | 301 | 27  | 857248  | 271628  | 0 | 0 | 1 | 0 | 50 | 49  | 26873016 | 1 | 1 |
| CXCR2    | 694517  | 301 | 27  | 877896  | 283020  | 0 | 0 | 0 | 0 | 50 | 45  | 24502056 | 1 | 1 |
| CXCR7    | 121886  | 599 | 10  | 904240  | 263084  | 0 | 0 | 0 | 0 | 47 | 48  | 17306940 | 1 | 1 |
| CXorf1   | 1641    | NaN | -34 | 285156  | 73692   | 0 | 0 | 0 | 0 | 50 | 124 | 22337220 | 1 | 1 |
| CXorf22  | 3828    | NaN | -13 | 2528668 | 667856  | 0 | 0 | 0 | 0 | 0  | 0   | 667856   | 1 | 1 |
| CXorf26  | 102519  | NaN | 16  | 619796  | 151300  | 0 | 0 | 0 | 0 | 50 | 75  | 23903264 | 1 | 1 |
| CXorf27  | 106141  | NaN | 28  | 304380  | 75828   | 0 | 0 | 0 | 0 | 50 | 59  | 27275296 | 1 | 1 |
| CXorf30  | NaN     | NaN | NaN | 1668928 | 422216  | 0 | 0 | 0 | 0 | 50 | 116 | 40067800 | 1 | 1 |
| CXorf40A | 187616  | NaN | 16  | 410824  | 118904  | 0 | 0 | 0 | 0 | 50 | 63  | 20686092 | 1 | 1 |

|          |         |     |     |         |         |   |   |   |   |    |     |          |   |   |
|----------|---------|-----|-----|---------|---------|---|---|---|---|----|-----|----------|---|---|
| CXorf41  | 229024  | NaN | 26  | 576364  | 138128  | 0 | 0 | 0 | 0 | 50 | 61  | 21116140 | 1 | 1 |
| CXorf48  | 228366  | NaN | 23  | 682096  | 190460  | 0 | 0 | 0 | 0 | 50 | 50  | 19392388 | 1 | 1 |
| CXorf49  | NaN     | NaN | NaN | 2551096 | 789608  | 0 | 0 | 0 | 0 | 7  | 14  | 4477768  | 1 | 1 |
| CXorf49B | NaN     | NaN | NaN | 2551096 | 789608  | 0 | 0 | 0 | 0 | 7  | 14  | 4477768  | 1 | 1 |
| CXorf51  | NaN     | NaN | NaN | 554648  | 160912  | 0 | 0 | 0 | 0 | 50 | 116 | 39806496 | 1 | 1 |
| CXorf58  | 528624  | NaN | 37  | 878252  | 222856  | 0 | 0 | 0 | 0 | 50 | 50  | 22018244 | 1 | 1 |
| CXorf59  | 3834    | NaN | -17 | 1325388 | 328944  | 0 | 0 | 0 | 0 | 20 | 56  | 11817064 | 1 | 1 |
| CXorf61  | 82720   | NaN | 4   | 287292  | 84372   | 0 | 0 | 0 | 0 | 50 | 76  | 26718512 | 1 | 1 |
| CXorf64  | NaN     | NaN | NaN | 730156  | 234248  | 0 | 0 | 0 | 0 | 50 | 116 | 39879832 | 1 | 1 |
| CYB561   | 874574  | 267 | -20 | 626560  | 202208  | 0 | 0 | 1 | 0 | 50 | 76  | 20536572 | 1 | 1 |
| CYB5A    | 152675  | 989 | 26  | 376292  | 89356   | 0 | 0 | 0 | 0 | 50 | 37  | 19320120 | 1 | 1 |
| CYB5R2   | 100503  | 853 | 13  | 731936  | 189748  | 0 | 0 | 0 | 0 | 50 | 69  | 20074128 | 1 | 1 |
| CYBASC3  | 1394229 | 286 | 57  | 656108  | 198292  | 0 | 0 | 0 | 0 | 50 | 56  | 17921040 | 1 | 1 |
| CYBB     | 105298  | NaN | 9   | 1483808 | 399076  | 0 | 0 | 1 | 0 | 50 | 83  | 24688956 | 1 | 1 |
| CYP2D6   | 1296288 | 363 | 43  | 1237456 | 396584  | 0 | 0 | 1 | 0 | 9  | 18  | 3861532  | 1 | 1 |
| CYP2W1   | 765060  | 346 | 34  | 1188684 | 420792  | 0 | 0 | 1 | 0 | 50 | 53  | 20860888 | 1 | 1 |
| CYS1     | 863812  | 214 | 44  | 381276  | 136704  | 0 | 0 | 0 | 0 | 50 | 61  | 22507388 | 1 | 1 |
| CYSLTR1  | 486217  | NaN | -9  | 856180  | 233180  | 0 | 0 | 1 | 0 | 50 | 50  | 20394884 | 1 | 1 |
| CYTL1    | 76400   | 557 | 36  | 343896  | 110004  | 0 | 0 | 0 | 0 | 50 | 58  | 21214040 | 1 | 1 |
| CY TSA   | 702019  | 200 | 38  | 2866868 | 779284  | 0 | 0 | 0 | 0 | 0  | 0   | 779284   | 1 | 1 |
| CY TSB   | 302887  | 339 | -13 | 2771104 | 784268  | 0 | 0 | 0 | 0 | 2  | 1   | 1062660  | 1 | 1 |
| CYYR1    | 345442  | 626 | -75 | 395872  | 113564  | 0 | 0 | 0 | 0 | 50 | 116 | 27785444 | 1 | 1 |
| CYorf15A | 0       | 0   | 0   | 351016  | 84728   | 0 | 0 | 0 | 0 | 50 | 39  | 21173456 | 1 | 1 |
| CYorf15B | 0       | 0   | 0   | 474904  | 121040  | 0 | 0 | 0 | 0 | 50 | 39  | 21173456 | 1 | 1 |
| DACT2    | NaN     | NaN | NaN | 1870424 | 627628  | 0 | 0 | 0 | 0 | 7  | 14  | 4315788  | 1 | 1 |
| DAD1     | 975314  | 380 | 49  | 287648  | 88288   | 0 | 0 | 0 | 0 | 50 | 81  | 24089452 | 1 | 1 |
| DAO      | 494991  | 393 | 49  | 902460  | 255252  | 0 | 0 | 0 | 0 | 50 | 69  | 24144988 | 1 | 1 |
| DAPL1    | 270644  | 361 | 14  | 283732  | 77252   | 0 | 0 | 0 | 0 | 50 | 59  | 21427284 | 1 | 1 |
| DARC     | 99569   | 785 | 14  | 825564  | 289428  | 0 | 0 | 0 | 0 | 50 | 43  | 18472484 | 1 | 1 |
| DAZ1     | NaN     | NaN | NaN | 1964408 | 537916  | 0 | 0 | 0 | 0 | 9  | 16  | 4895356  | 1 | 1 |
| DAZ2     | NaN     | NaN | NaN | 2922404 | 775012  | 0 | 0 | 0 | 0 | 7  | 14  | 4463172  | 1 | 1 |
| DAZ3     | NaN     | NaN | NaN | 3452132 | 918124  | 0 | 0 | 0 | 0 | 5  | 8   | 3290152  | 1 | 1 |
| DAZ4     | NaN     | NaN | NaN | 3989336 | 1074052 | 0 | 0 | 0 | 0 | 0  | 0   | 1074052  | 1 | 1 |

|          |         |      |     |         |        |   |   |   |   |    |     |          |   |   |
|----------|---------|------|-----|---------|--------|---|---|---|---|----|-----|----------|---|---|
| DBC1     | 3696    | 1010 | -25 | 1951236 | 520116 | 0 | 0 | 0 | 0 | 18 | 21  | 6810636  | 1 | 1 |
| DCD      | 615189  | 494  | 31  | 291564  | 83304  | 0 | 0 | 0 | 0 | 50 | 83  | 25232212 | 1 | 1 |
| DCI      | 2199935 | 194  | 42  | 757924  | 240656 | 0 | 0 | 0 | 0 | 50 | 61  | 21477480 | 1 | 1 |
| DCTN6    | 452029  | 297  | 47  | 507656  | 132076 | 0 | 0 | 1 | 0 | 50 | 54  | 21508808 | 1 | 1 |
| DDAH2    | 2517236 | 193  | 20  | 695268  | 246708 | 0 | 0 | 3 | 0 | 1  | 3   | 378072   | 1 | 1 |
| DDT      | NaN     | NaN  | NaN | 300464  | 95764  | 0 | 0 | 0 | 0 | 50 | 116 | 39741348 | 1 | 1 |
| DDX25    | 611330  | 414  | 14  | 1269140 | 328588 | 0 | 0 | 0 | 0 | 4  | 5   | 2325748  | 1 | 1 |
| DDX39    | 954144  | 204  | 43  | 1118196 | 295836 | 0 | 0 | 0 | 0 | 22 | 20  | 9379532  | 1 | 1 |
| DDX49    | 1390116 | 198  | 20  | 1236388 | 367748 | 0 | 0 | 3 | 0 | 29 | 40  | 11150988 | 1 | 1 |
| 1-Dec    | 117692  | 604  | -17 | 196156  | 48416  | 0 | 0 | 0 | 0 | 35 | 38  | 17416232 | 1 | 1 |
| DECR2    | 1549307 | 207  | 37  | 737988  | 232824 | 0 | 0 | 0 | 0 | 36 | 55  | 20238956 | 1 | 1 |
| DEDD2    | 790787  | 299  | 37  | 784624  | 280172 | 0 | 0 | 0 | 0 | 18 | 15  | 6929540  | 1 | 1 |
| DEFA1    | NaN     | NaN  | NaN | 730156  | 208616 | 0 | 0 | 0 | 0 | 50 | 116 | 39854200 | 1 | 1 |
| DEFA1B   | 132154  | 699  | -1  | 730156  | 208616 | 0 | 0 | 0 | 0 | 21 | 26  | 10670388 | 1 | 1 |
| DEFA3    | 132154  | 699  | -1  | 243860  | 69064  | 0 | 0 | 0 | 0 | 50 | 63  | 21418740 | 1 | 1 |
| DEFA4    | 131884  | 628  | 11  | 247420  | 75116  | 0 | 0 | 0 | 0 | 50 | 58  | 19951664 | 1 | 1 |
| DEFA6    | 131884  | 628  | 11  | 257744  | 72268  | 0 | 0 | 1 | 0 | 2  | 1   | 194376   | 1 | 1 |
| DEFB1    | 131884  | 628  | 11  | 178356  | 46992  | 0 | 0 | 0 | 0 | 50 | 58  | 19951664 | 1 | 1 |
| DEFB103A | NaN     | NaN  | NaN | 360272  | 96832  | 0 | 0 | 0 | 0 | 50 | 116 | 39742416 | 1 | 1 |
| DEFB103B | NaN     | NaN  | NaN | 360272  | 96832  | 0 | 0 | 0 | 0 | 50 | 116 | 39742416 | 1 | 1 |
| DEFB104A | NaN     | NaN  | NaN | 387328  | 97544  | 0 | 0 | 0 | 0 | 50 | 116 | 39743128 | 1 | 1 |
| DEFB104B | NaN     | NaN  | NaN | 387328  | 97544  | 0 | 0 | 0 | 0 | 50 | 116 | 39743128 | 1 | 1 |
| DEFB105A | NaN     | NaN  | NaN | 423640  | 97544  | 0 | 0 | 0 | 0 | 50 | 116 | 39743128 | 1 | 1 |
| DEFB105B | NaN     | NaN  | NaN | 423640  | 97544  | 0 | 0 | 0 | 0 | 50 | 116 | 39743128 | 1 | 1 |
| DEFB106A | NaN     | NaN  | NaN | 357424  | 82592  | 0 | 0 | 0 | 0 | 50 | 116 | 39728176 | 1 | 1 |
| DEFB106B | NaN     | NaN  | NaN | 357424  | 82592  | 0 | 0 | 0 | 0 | 50 | 116 | 39728176 | 1 | 1 |
| DEFB107A | NaN     | NaN  | NaN | 379496  | 92560  | 0 | 0 | 0 | 0 | 50 | 116 | 39738144 | 1 | 1 |
| DEFB107B | NaN     | NaN  | NaN | 379496  | 92560  | 0 | 0 | 0 | 0 | 50 | 116 | 39738144 | 1 | 1 |
| DEFB108B | 727046  | 465  | 37  | 192240  | 48060  | 0 | 0 | 0 | 0 | 50 | 66  | 22765488 | 1 | 1 |
| DEFB110  | 70183   | 1258 | -7  | 308296  | 59096  | 0 | 0 | 0 | 0 | 50 | 45  | 19480676 | 1 | 1 |
| DEFB113  | 70183   | 1258 | -7  | 212888  | 48772  | 0 | 0 | 0 | 0 | 50 | 45  | 19480676 | 1 | 1 |
| DEFB118  | 591819  | 594  | -83 | 316128  | 87576  | 0 | 0 | 0 | 0 | 50 | 104 | 27802888 | 1 | 1 |
| DEFB119  | 591819  | 594  | -83 | 445356  | 104664 | 0 | 0 | 1 | 0 | 50 | 104 | 27802888 | 1 | 1 |

|          |         |     |     |         |        |   |   |   |   |    |     |          |   |   |
|----------|---------|-----|-----|---------|--------|---|---|---|---|----|-----|----------|---|---|
| DEFB121  | 598822  | 450 | -79 | 220720  | 58028  | 0 | 0 | 0 | 0 | 50 | 111 | 28209084 | 1 | 1 |
| DEFB126  | 215351  | 430 | 25  | 287292  | 80100  | 0 | 0 | 1 | 0 | 5  | 5   | 857604   | 1 | 1 |
| DEFB127  | 215351  | 430 | 25  | 256676  | 67996  | 0 | 0 | 2 | 0 | 4  | 5   | 628340   | 1 | 1 |
| DEFB130  | 475312  | 625 | 0   | 408688  | 112496 | 0 | 0 | 0 | 0 | 50 | 72  | 22627360 | 1 | 1 |
| DEFB131  | 176573  | 885 | 12  | 189748  | 40940  | 0 | 0 | 0 | 0 | 50 | 73  | 20658680 | 1 | 1 |
| DEFB132  | 1010597 | 348 | 24  | 247420  | 66572  | 0 | 0 | 0 | 0 | 50 | 85  | 21827784 | 1 | 1 |
| DEFB133  | NaN     | NaN | NaN | 165540  | 37380  | 0 | 0 | 0 | 0 | 50 | 116 | 39682964 | 1 | 1 |
| DEFB134  | 467502  | 451 | 22  | 177288  | 40584  | 0 | 0 | 0 | 0 | 50 | 58  | 22225080 | 1 | 1 |
| DEFB136  | 467502  | 451 | 22  | 203632  | 51620  | 0 | 0 | 0 | 0 | 50 | 58  | 22225080 | 1 | 1 |
| DEFB4A   | 69060   | 693 | -5  | 169100  | 45568  | 0 | 0 | 0 | 0 | 50 | 71  | 21235400 | 1 | 1 |
| DEGS1    | 638932  | 174 | 13  | 833752  | 212888 | 0 | 0 | 0 | 0 | 50 | 52  | 21216888 | 1 | 1 |
| DEGS2    | 405420  | 237 | 39  | 797440  | 251336 | 0 | 0 | 1 | 0 | 50 | 35  | 18495980 | 1 | 1 |
| DEM1     | 701723  | 457 | 31  | 929516  | 273052 | 0 | 0 | 0 | 0 | 50 | 59  | 24104048 | 1 | 1 |
| DEPDC6   | 244861  | 712 | 8   | 1073340 | 274476 | 0 | 0 | 0 | 0 | 23 | 14  | 7214340  | 1 | 1 |
| DEXI     | 339622  | 430 | 41  | 228908  | 78676  | 0 | 0 | 0 | 0 | 50 | 75  | 24230784 | 1 | 1 |
| DFFB     | 249345  | 412 | 26  | 872556  | 239232 | 0 | 0 | 1 | 0 | 50 | 57  | 20727032 | 1 | 1 |
| DGAT2    | 534135  | 418 | 46  | 991460  | 284800 | 0 | 0 | 1 | 0 | 50 | 59  | 22557940 | 1 | 1 |
| DGCR6    | 621867  | 545 | -1  | 557140  | 168032 | 0 | 0 | 0 | 0 | 50 | 79  | 22714224 | 1 | 1 |
| DHDPSL   | 564805  | 169 | 40  | 826632  | 249912 | 0 | 0 | 0 | 0 | 50 | 62  | 20233616 | 1 | 1 |
| DHFR     | 319054  | 626 | 35  | 501604  | 122108 | 0 | 0 | 1 | 0 | 22 | 22  | 6814908  | 1 | 1 |
| DHH      | 1770671 | 214 | 65  | 942332  | 338200 | 0 | 0 | 3 | 0 | 0  | 3   | 338200   | 1 | 1 |
| DHRS13   | 1834230 | 220 | 37  | 915632  | 312568 | 0 | 0 | 1 | 0 | 50 | 67  | 23772612 | 1 | 1 |
| DHRS4L1  | 992350  | 355 | 19  | 725172  | 216804 | 0 | 0 | 0 | 0 | 50 | 70  | 21277764 | 1 | 1 |
| DIMT1L   | 176808  | 575 | 33  | 830548  | 222500 | 0 | 0 | 0 | 0 | 50 | 56  | 21434048 | 1 | 1 |
| DIO1     | 505734  | 319 | 24  | 647564  | 168388 | 0 | 0 | 2 | 0 | 1  | 2   | 389108   | 1 | 1 |
| DIRAS3   | 331080  | 524 | -25 | 572448  | 168744 | 0 | 0 | 3 | 0 | 2  | 5   | 781776   | 1 | 1 |
| FZP781G0 | NaN     | NaN | NaN | 1797444 | 456036 | 0 | 0 | 0 | 0 | 50 | 116 | 40101620 | 1 | 1 |
| ∫Fz761E1 | 3834148 | 287 | 55  | 1897836 | 737988 | 0 | 0 | 0 | 0 | 0  | 0   | 737988   | 1 | 1 |
| DLEU7    | 136985  | 649 | 31  | 381276  | 139908 | 0 | 0 | 0 | 0 | 50 | 49  | 21266728 | 1 | 1 |
| DLX5     | 99426   | 991 | -15 | 724816  | 212888 | 0 | 0 | 0 | 0 | 50 | 65  | 20345400 | 1 | 1 |
| DMRTA2   | 147973  | 639 | -7  | 828412  | 316484 | 0 | 0 | 2 | 0 | 11 | 6   | 4120344  | 1 | 1 |
| DMRTC1   | NaN     | NaN | NaN | 969032  | 314704 | 0 | 0 | 0 | 0 | 50 | 116 | 39960288 | 1 | 1 |
| DMRTC1B  | NaN     | NaN | NaN | 969032  | 314704 | 0 | 0 | 0 | 0 | 50 | 116 | 39960288 | 1 | 1 |

|          |         |      |     |          |         |   |   |   |   |    |     |          |   |   |
|----------|---------|------|-----|----------|---------|---|---|---|---|----|-----|----------|---|---|
| DNAH14   | NaN     | NaN  | NaN | 11868328 | 3000368 | 0 | 0 | 2 | 0 | 0  | 2   | 3000368  | 1 | 1 |
| DNAJB3   | NaN     | NaN  | NaN | 369528   | 100392  | 0 | 0 | 0 | 0 | 50 | 116 | 39745976 | 1 | 1 |
| DNAJB7   | NaN     | NaN  | NaN | 795304   | 197936  | 0 | 0 | 1 | 0 | 50 | 117 | 39843520 | 1 | 1 |
| DNAJC19  | 182678  | 1094 | -4  | 316840   | 81524   | 0 | 0 | 0 | 0 | 50 | 35  | 18626632 | 1 | 1 |
| AJC25-GN | 513721  | 212  | 17  | 372732   | 133500  | 0 | 0 | 0 | 0 | 50 | 51  | 20911084 | 1 | 1 |
| DNAJC27  | 270621  | 296  | 35  | 721612   | 184052  | 0 | 0 | 2 | 0 | 8  | 7   | 2623364  | 1 | 1 |
| DNAJC4   | 1608193 | 179  | 61  | 616592   | 182272  | 0 | 0 | 1 | 0 | 50 | 67  | 20204068 | 1 | 1 |
| DNAJC7   | 2081077 | 206  | 23  | 1323608  | 317908  | 0 | 0 | 2 | 0 | 50 | 79  | 22998668 | 1 | 1 |
| DNAL4    | 1291659 | 272  | 73  | 279104   | 69064   | 0 | 0 | 0 | 0 | 50 | 42  | 16818864 | 1 | 1 |
| DNASE1   | 611617  | 242  | 43  | 733360   | 208616  | 0 | 0 | 0 | 0 | 50 | 54  | 23753744 | 1 | 1 |
| DNASE1L1 | 2277674 | NaN  | 40  | 768604   | 232112  | 0 | 0 | 1 | 0 | 50 | 46  | 20570392 | 1 | 1 |
| DNASE1L2 | 2179404 | 224  | 39  | 756144   | 230688  | 0 | 0 | 1 | 0 | 50 | 46  | 19527312 | 1 | 1 |
| DND1     | 774470  | 356  | 31  | 865436   | 283732  | 0 | 0 | 0 | 0 | 19 | 25  | 9696372  | 1 | 1 |
| DOC2B    | NaN     | NaN  | NaN | 771808   | 235316  | 0 | 0 | 0 | 0 | 50 | 116 | 39880900 | 1 | 1 |
| DOHH     | 2172733 | 210  | 36  | 742260   | 245640  | 0 | 0 | 0 | 0 | 50 | 54  | 24098352 | 1 | 1 |
| DOLPP1   | 1428394 | 206  | 30  | 618016   | 179780  | 0 | 0 | 1 | 0 | 50 | 55  | 20767616 | 1 | 1 |
| DOM3Z    | 2314693 | 203  | 34  | 997868   | 301888  | 0 | 0 | 0 | 0 | 50 | 60  | 23217608 | 1 | 1 |
| DPCD     | 843302  | 421  | 19  | 542900   | 136348  | 0 | 0 | 0 | 0 | 50 | 65  | 21446508 | 1 | 1 |
| DPH3B    | NaN     | NaN  | NaN | 202920   | 50196   | 0 | 0 | 0 | 0 | 50 | 116 | 39695780 | 1 | 1 |
| DPH5     | 153041  | 727  | -6  | 749736   | 196512  | 0 | 0 | 0 | 0 | 31 | 28  | 12783960 | 1 | 1 |
| DPM2     | 1441525 | 201  | 56  | 217872   | 67284   | 0 | 0 | 0 | 0 | 50 | 40  | 17334352 | 1 | 1 |
| DPT      | 358217  | 440  | 9   | 538272   | 123888  | 0 | 0 | 1 | 0 | 50 | 57  | 21132160 | 1 | 1 |
| DPYSL5   | 1261383 | 378  | 36  | 1439308  | 422216  | 0 | 0 | 1 | 0 | 25 | 34  | 10393776 | 1 | 1 |
| DR1      | 699815  | 223  | 13  | 457460   | 118192  | 0 | 0 | 1 | 0 | 8  | 15  | 2897840  | 1 | 1 |
| DRAM1    | 340236  | 238  | 17  | 619084   | 172304  | 0 | 0 | 0 | 0 | 50 | 49  | 23432276 | 1 | 1 |
| DRAP1    | 3779084 | 287  | 42  | 541120   | 144536  | 0 | 0 | 0 | 0 | 2  | 1   | 552868   | 1 | 1 |
| DSCR6    | 414773  | 378  | 76  | 475972   | 148808  | 0 | 0 | 0 | 0 | 50 | 59  | 19569676 | 1 | 1 |
| DTD1     | 262495  | 613  | 6   | 547884   | 146316  | 0 | 0 | 0 | 0 | 50 | 44  | 19160632 | 1 | 1 |
| DTHD1    | NaN     | NaN  | NaN | 2025996  | 536136  | 0 | 0 | 0 | 0 | 9  | 16  | 4893576  | 1 | 1 |
| DTYMK    | 1323203 | 406  | 32  | 543256   | 156284  | 0 | 0 | 0 | 0 | 50 | 66  | 20935292 | 1 | 1 |
| DULLARD  | 1782958 | 316  | 21  | 636172   | 178712  | 0 | 0 | 0 | 0 | 39 | 39  | 14081580 | 1 | 1 |
| DUS2L    | 859239  | 138  | 55  | 1281244  | 365612  | 0 | 0 | 0 | 0 | 4  | 7   | 2455688  | 1 | 1 |
| DUS4L    | 512690  | 753  | 26  | 835176   | 209328  | 0 | 0 | 1 | 0 | 49 | 38  | 18677184 | 1 | 1 |

|         |         |     |     |         |        |   |   |   |   |    |     |          |   |   |
|---------|---------|-----|-----|---------|--------|---|---|---|---|----|-----|----------|---|---|
| DUSP23  | 801453  | 497 | 6   | 364900  | 127448 | 0 | 0 | 0 | 0 | 50 | 57  | 19094772 | 1 | 1 |
| DUSP3   | 1081050 | 192 | 35  | 474192  | 132432 | 0 | 0 | 1 | 0 | 50 | 58  | 18400572 | 1 | 1 |
| DUSP5   | 493408  | 157 | 51  | 944112  | 302244 | 0 | 0 | 1 | 0 | 50 | 52  | 20126460 | 1 | 1 |
| DUX4    | NaN     | NaN | NaN | 2278400 | 840160 | 0 | 0 | 0 | 0 | 7  | 14  | 4528320  | 1 | 1 |
| DYDC1   | 352963  | 598 | 18  | 488076  | 110004 | 0 | 0 | 0 | 0 | 50 | 52  | 25894016 | 1 | 1 |
| DYNLL2  | 857807  | 352 | 11  | 242792  | 54112  | 0 | 0 | 1 | 0 | 0  | 1   | 54112    | 1 | 1 |
| DYNLRB1 | 990458  | 214 | 54  | 259880  | 65860  | 0 | 0 | 1 | 0 | 1  | 3   | 154860   | 1 | 1 |
| DYNLRB2 | 149480  | 465 | -30 | 259880  | 65860  | 0 | 0 | 0 | 0 | 50 | 106 | 22824228 | 1 | 1 |
| DYSFIP1 | 3733473 | NaN | 19  | 386616  | 120684 | 0 | 0 | 0 | 0 | 39 | 38  | 14805328 | 1 | 1 |
| EBAG9   | 134329  | 623 | 8   | 570312  | 140976 | 0 | 0 | 0 | 0 | 50 | 56  | 20322260 | 1 | 1 |
| EBF4    | NaN     | NaN | NaN | 1527596 | 464224 | 0 | 0 | 0 | 0 | 50 | 116 | 40109808 | 1 | 1 |
| ECEL1   | 271362  | 191 | 32  | 1976156 | 581704 | 0 | 0 | 2 | 0 | 43 | 56  | 15064496 | 1 | 1 |
| ECSCR   | 806824  | NaN | 41  | 195088  | 54824  | 0 | 0 | 0 | 0 | 50 | 65  | 20236108 | 1 | 1 |
| EDARADL | 482656  | 589 | 11  | 605556  | 145248 | 0 | 0 | 0 | 0 | 50 | 69  | 21799304 | 1 | 1 |
| EDDM3A  | 956361  | 577 | 8   | 389464  | 89000  | 0 | 0 | 0 | 0 | 50 | 92  | 23350396 | 1 | 1 |
| EDF1    | 1921909 | 176 | 44  | 417588  | 116412 | 0 | 0 | 0 | 0 | 50 | 56  | 20791468 | 1 | 1 |
| EFCAB2  | 675692  | 505 | 10  | 473124  | 112140 | 0 | 0 | 0 | 0 | 50 | 62  | 20840596 | 1 | 1 |
| EFCAB4A | 1799017 | 232 | 51  | 742972  | 232112 | 0 | 0 | 0 | 0 | 50 | 57  | 18763692 | 1 | 1 |
| EFCAB4B | 241693  | 793 | 18  | 2070140 | 550732 | 0 | 0 | 0 | 0 | 36 | 29  | 14343240 | 1 | 1 |
| EFCAB9  | NaN     | NaN | NaN | 526168  | 122108 | 0 | 0 | 0 | 0 | 50 | 116 | 39767692 | 1 | 1 |
| EFEMP2  | 3779084 | 287 | 42  | 1154864 | 310432 | 0 | 0 | 1 | 0 | 2  | 2   | 718764   | 1 | 1 |
| EFHA1   | 345194  | 422 | 31  | 1159848 | 283020 | 0 | 0 | 0 | 0 | 50 | 50  | 23860188 | 1 | 1 |
| EFHA2   | 191406  | 621 | -37 | 1386620 | 374512 | 0 | 0 | 0 | 0 | 22 | 44  | 10538312 | 1 | 1 |
| EFNA1   | 1801444 | 194 | 32  | 538272  | 138840 | 0 | 0 | 2 | 0 | 2  | 4   | 372376   | 1 | 1 |
| EFNA4   | 1696720 | 214 | 44  | 666788  | 184408 | 0 | 0 | 0 | 0 | 50 | 84  | 23988348 | 1 | 1 |
| EFR3B   | NaN     | NaN | NaN | 2129948 | 584908 | 0 | 0 | 0 | 0 | 7  | 14  | 4273068  | 1 | 1 |
| EGFL8   | 2119974 | 392 | 28  | 757212  | 218940 | 0 | 0 | 1 | 0 | 50 | 62  | 23774036 | 1 | 1 |
| EGLN3   | 163649  | 564 | 0   | 611252  | 174796 | 0 | 0 | 0 | 0 | 50 | 52  | 19769392 | 1 | 1 |
| EI24    | 391073  | 595 | 23  | 921328  | 212888 | 0 | 0 | 1 | 0 | 24 | 23  | 10416916 | 1 | 1 |
| EIF1AD  | 3854361 | 208 | 57  | 444644  | 108580 | 0 | 0 | 0 | 0 | 29 | 35  | 13479584 | 1 | 1 |
| EIF1AX  | 262207  | NaN | 37  | 403704  | 86508  | 0 | 0 | 0 | 0 | 50 | 54  | 19347532 | 1 | 1 |
| EIF1AY  | 0       | 0   | 0   | 404060  | 86152  | 0 | 0 | 0 | 0 | 50 | 39  | 21173456 | 1 | 1 |
| EIF2C1  | 973030  | 273 | 12  | 2209692 | 616236 | 0 | 0 | 0 | 0 | 4  | 4   | 2222508  | 1 | 1 |



|          |         |     |     |         |         |   |   |   |   |    |     |          |   |   |
|----------|---------|-----|-----|---------|---------|---|---|---|---|----|-----|----------|---|---|
| EIF2C2   | 451419  | 238 | 46  | 2219660 | 614812  | 0 | 0 | 0 | 0 | 16 | 9   | 5474212  | 1 | 1 |
| EIF2C3   | 966499  | 282 | 25  | 2217524 | 618016  | 0 | 0 | 0 | 0 | 7  | 13  | 4826292  | 1 | 1 |
| EIF2C4   | 1098857 | 273 | 19  | 2218948 | 615524  | 0 | 0 | 0 | 0 | 23 | 44  | 13858012 | 1 | 1 |
| EIF3C    | NaN     | NaN | NaN | 4786776 | 1244220 | 0 | 0 | 0 | 0 | 0  | 0   | 1244220  | 1 | 1 |
| EIF3CL   | 1139917 | 269 | 56  | 4786776 | 1244220 | 0 | 0 | 0 | 0 | 0  | 0   | 1244220  | 1 | 1 |
| EIF4EBP3 | 706371  | 319 | 29  | 299752  | 34532   | 0 | 0 | 0 | 0 | 50 | 44  | 23563640 | 1 | 1 |
| EIF5A2   | 199827  | 640 | 26  | 404060  | 106444  | 0 | 0 | 0 | 0 | 50 | 52  | 19158852 | 1 | 1 |
| ELF5     | 685229  | 295 | 5   | 715560  | 162336  | 0 | 0 | 0 | 0 | 50 | 78  | 27692172 | 1 | 1 |
| ELK3     | 267884  | 525 | 23  | 1004276 | 320044  | 0 | 0 | 0 | 0 | 17 | 21  | 8937024  | 1 | 1 |
| ELL      | 1389540 | 259 | 45  | 1569960 | 472056  | 0 | 0 | 1 | 0 | 17 | 23  | 8910680  | 1 | 1 |
| ELMOD1   | 300861  | 676 | -3  | 904952  | 215380  | 0 | 0 | 0 | 0 | 50 | 63  | 15971584 | 1 | 1 |
| ELOF1    | 1152381 | 272 | 31  | 226060  | 55892   | 0 | 0 | 0 | 0 | 50 | 48  | 19593884 | 1 | 1 |
| ELOVL3   | 1041024 | 187 | 45  | 699184  | 181916  | 0 | 0 | 1 | 0 | 32 | 41  | 18107940 | 1 | 1 |
| ELOVL4   | 151698  | 913 | -14 | 824496  | 206124  | 0 | 0 | 0 | 0 | 50 | 54  | 19664016 | 1 | 1 |
| ELTD1    | 74049   | 903 | -17 | 1807412 | 466360  | 0 | 0 | 0 | 0 | 6  | 3   | 3284812  | 1 | 1 |
| EME2     | 1604603 | 288 | 36  | 1084732 | 372020  | 0 | 0 | 0 | 0 | 12 | 7   | 3876840  | 1 | 1 |
| EMG1     | 2704950 | 211 | 47  | 624780  | 180492  | 0 | 0 | 0 | 0 | 1  | 0   | 1171596  | 1 | 1 |
| EMID2    | 653305  | 280 | 43  | 1092208 | 365612  | 0 | 0 | 0 | 0 | 50 | 50  | 22575028 | 1 | 1 |
| EML6     | NaN     | NaN | NaN | 5077272 | 1372380 | 0 | 0 | 0 | 0 | 0  | 0   | 1372380  | 1 | 1 |
| EMP1     | 636324  | 203 | -3  | 408688  | 114632  | 0 | 0 | 0 | 0 | 50 | 72  | 21753736 | 1 | 1 |
| EMR1     | 748613  | 383 | 27  | 2324680 | 604844  | 0 | 0 | 0 | 0 | 17 | 16  | 8272372  | 1 | 1 |
| EMR2     | 1032767 | 448 | 29  | 2128524 | 592740  | 0 | 0 | 0 | 0 | 7  | 6   | 3335720  | 1 | 1 |
| EMR3     | 1036916 | 384 | 31  | 1698120 | 458172  | 0 | 0 | 0 | 0 | 28 | 26  | 9799256  | 1 | 1 |
| EMX1     | 450159  | 421 | 23  | 703812  | 237096  | 0 | 0 | 2 | 0 | 2  | 5   | 1503032  | 1 | 1 |
| EMX2     | 130702  | 632 | 4   | 646852  | 172304  | 0 | 0 | 2 | 0 | 10 | 17  | 3232480  | 1 | 1 |
| EN2      | 267699  | 599 | -4  | 806340  | 268068  | 0 | 0 | 0 | 0 | 6  | 4   | 1628700  | 1 | 1 |
| ENDOG    | 1768145 | 201 | 34  | 718408  | 247064  | 0 | 0 | 0 | 0 | 26 | 29  | 9773980  | 1 | 1 |
| ENHO     | 843127  | 370 | 55  | 185476  | 61232   | 0 | 0 | 0 | 0 | 50 | 48  | 16293408 | 1 | 1 |
| ENTPD4   | 476980  | 332 | 37  | 1588116 | 440016  | 0 | 0 | 2 | 0 | 50 | 49  | 19188044 | 1 | 1 |
| ENY2     | 135626  | 732 | 20  | 281952  | 64080   | 0 | 0 | 0 | 0 | 50 | 137 | 47881288 | 1 | 1 |
| EPB49    | 584373  | 219 | 34  | 1069780 | 298328  | 0 | 0 | 0 | 0 | 47 | 53  | 20310512 | 1 | 1 |
| ERLIN1   | 1070291 | 198 | 25  | 928448  | 236740  | 0 | 0 | 0 | 0 | 50 | 78  | 19641944 | 1 | 1 |
| ERP27    | 341752  | 426 | 8   | 718764  | 186900  | 0 | 0 | 2 | 0 | 24 | 34  | 8550052  | 1 | 1 |

|          |         |      |     |         |        |   |   |   |   |    |     |          |   |   |
|----------|---------|------|-----|---------|--------|---|---|---|---|----|-----|----------|---|---|
| ERV3     | 216422  | 994  | -9  | 1509440 | 428980 | 0 | 0 | 0 | 0 | 8  | 3   | 4441100  | 1 | 1 |
| ERVFRDE  | NaN     | NaN  | NaN | 1319692 | 407264 | 0 | 0 | 0 | 0 | 50 | 116 | 40052848 | 1 | 1 |
| ESAM     | 168652  | 622  | 14  | 957996  | 320400 | 0 | 0 | 1 | 0 | 50 | 50  | 19749100 | 1 | 1 |
| ETFA     | 307633  | 186  | 35  | 871132  | 248132 | 0 | 0 | 0 | 0 | 29 | 34  | 9748348  | 1 | 1 |
| ETNK2    | 557652  | 370  | 34  | 999292  | 270560 | 0 | 0 | 2 | 0 | 9  | 11  | 3453200  | 1 | 1 |
| EVPLL    | NaN     | NaN  | NaN | 791032  | 219296 | 0 | 0 | 0 | 0 | 50 | 116 | 39864880 | 1 | 1 |
| EXD2     | 821714  | 373  | 39  | 1267004 | 355288 | 0 | 0 | 1 | 0 | 50 | 53  | 21084456 | 1 | 1 |
| EXOC3L   | 1109491 | 150  | 46  | 1825924 | 625136 | 0 | 0 | 0 | 0 | 5  | 1   | 3011048  | 1 | 1 |
| EXOSC3   | 489340  | 453  | 23  | 694200  | 207192 | 0 | 0 | 0 | 0 | 50 | 50  | 17617728 | 1 | 1 |
| EXOSC6   | 1353954 | 139  | 37  | 626560  | 250268 | 0 | 0 | 0 | 0 | 50 | 63  | 21892220 | 1 | 1 |
| F8A1     | NaN     | NaN  | NaN | 867216  | 326808 | 0 | 0 | 0 | 0 | 50 | 116 | 39972392 | 1 | 1 |
| F8A2     | NaN     | NaN  | NaN | 2603784 | 980424 | 0 | 0 | 0 | 0 | 0  | 0   | 980424   | 1 | 1 |
| F8A3     | NaN     | NaN  | NaN | 867216  | 326808 | 0 | 0 | 0 | 0 | 50 | 116 | 39972392 | 1 | 1 |
| FAAH2    | 91305   | NaN  | -6  | 1368108 | 382344 | 0 | 0 | 0 | 0 | 26 | 33  | 13034228 | 1 | 1 |
| FABP3    | 708176  | 262  | 29  | 350660  | 93628  | 0 | 0 | 0 | 0 | 50 | 70  | 24308392 | 1 | 1 |
| FABP4    | 191177  | 595  | 1   | 353152  | 87932  | 0 | 0 | 0 | 0 | 50 | 53  | 20427636 | 1 | 1 |
| FABP5    | 231632  | 463  | 42  | 362408  | 88288  | 0 | 0 | 0 | 0 | 50 | 80  | 21960928 | 1 | 1 |
| FABP7    | 138284  | 1073 | -1  | 352440  | 86508  | 0 | 0 | 0 | 0 | 50 | 41  | 15762612 | 1 | 1 |
| FADS6    | 1027517 | 320  | 20  | 875404  | 272696 | 0 | 0 | 1 | 0 | 50 | 57  | 19874768 | 1 | 1 |
| FAHD1    | 1604603 | 288  | 36  | 791388  | 225348 | 0 | 0 | 1 | 0 | 50 | 49  | 20717064 | 1 | 1 |
| FAIM2    | 1291800 | 231  | 45  | 821292  | 241368 | 0 | 0 | 1 | 0 | 50 | 88  | 26715664 | 1 | 1 |
| FAM100A  | 742112  | 160  | 46  | 447492  | 131364 | 0 | 0 | 0 | 0 | 50 | 60  | 18215452 | 1 | 1 |
| FAM100B  | 1678166 | 209  | 19  | 421504  | 115700 | 0 | 0 | 0 | 0 | 50 | 115 | 26690388 | 1 | 1 |
| FAM104B  | 214019  | NaN  | 18  | 437524  | 96476  | 0 | 0 | 0 | 0 | 50 | 59  | 20814964 | 1 | 1 |
| FAM105B  | 511502  | 422  | 16  | 913140  | 243504 | 0 | 0 | 0 | 0 | 50 | 55  | 17947028 | 1 | 1 |
| FAM107A  | 534993  | 383  | 31  | 373444  | 103952 | 0 | 0 | 0 | 0 | 50 | 51  | 19608836 | 1 | 1 |
| FAM108A1 | 2226995 | 214  | 26  | 893204  | 283732 | 0 | 0 | 0 | 0 | 50 | 75  | 24188776 | 1 | 1 |
| FAM108B1 | 284075  | 358  | 4   | 761128  | 208616 | 0 | 0 | 0 | 0 | 50 | 55  | 22803580 | 1 | 1 |
| FAM108C1 | 334777  | 313  | 7   | 812748  | 253116 | 0 | 0 | 0 | 0 | 50 | 58  | 24713520 | 1 | 1 |
| FAM109B  | 1321127 | 363  | 65  | 636884  | 200428 | 0 | 0 | 0 | 0 | 50 | 55  | 15728436 | 1 | 1 |
| FAM110A  | 824412  | 579  | 36  | 688860  | 263796 | 0 | 0 | 1 | 0 | 50 | 49  | 19535144 | 1 | 1 |
| FAM113A  | 766497  | 396  | 44  | 1143828 | 343896 | 0 | 0 | 0 | 0 | 50 | 66  | 23498136 | 1 | 1 |
| FAM113B  | 261073  | 398  | 0   | 1055540 | 336064 | 0 | 0 | 0 | 0 | 24 | 21  | 9975832  | 1 | 1 |

|          |         |     |     |         |        |   |   |   |   |    |     |          |   |   |
|----------|---------|-----|-----|---------|--------|---|---|---|---|----|-----|----------|---|---|
| FAM115A  | 453936  | 618 | -5  | 2292284 | 695980 | 0 | 0 | 0 | 0 | 0  | 0   | 695980   | 1 | 1 |
| FAM115C  | 433430  | 463 | -7  | 2571744 | 779640 | 0 | 0 | 0 | 0 | 2  | 1   | 1201144  | 1 | 1 |
| FAM116A  | 718677  | 332 | 30  | 1611612 | 422928 | 0 | 0 | 0 | 0 | 0  | 0   | 422928   | 1 | 1 |
| FAM116B  | 939384  | 257 | 70  | 1385196 | 382344 | 0 | 0 | 0 | 0 | 5  | 9   | 3295492  | 1 | 1 |
| FAM119A  | 183578  | 198 | 24  | 554292  | 160200 | 0 | 0 | 0 | 0 | 50 | 47  | 20425856 | 1 | 1 |
| FAM119B  | 1160849 | 344 | 39  | 687436  | 201140 | 0 | 0 | 0 | 0 | 50 | 87  | 20175588 | 1 | 1 |
| FAM122A  | NaN     | NaN | NaN | 704168  | 218584 | 0 | 0 | 1 | 0 | 50 | 117 | 39864168 | 1 | 1 |
| FAM123A  | 331169  | 650 | 34  | 1625852 | 529372 | 0 | 0 | 0 | 0 | 3  | 2   | 1648992  | 1 | 1 |
| FAM123B  | 57924   | NaN | 2   | 2810264 | 833752 | 0 | 0 | 0 | 0 | 1  | 1   | 1069424  | 1 | 1 |
| FAM123C  | 607528  | 203 | 17  | 2082244 | 687080 | 0 | 0 | 0 | 0 | 2  | 1   | 1339272  | 1 | 1 |
| FAM125A  | 899127  | 211 | 26  | 698472  | 215736 | 0 | 0 | 0 | 0 | 50 | 49  | 18107584 | 1 | 1 |
| FAM125B  | 112775  | 646 | 33  | 835532  | 232468 | 0 | 0 | 0 | 0 | 50 | 59  | 22884748 | 1 | 1 |
| FAM127C  | 304745  | NaN | 42  | 282664  | 84728  | 0 | 0 | 0 | 0 | 50 | 59  | 20553304 | 1 | 1 |
| FAM128A  | 455705  | 540 | 29  | 389464  | 130652 | 0 | 0 | 0 | 0 | 50 | 54  | 19959852 | 1 | 1 |
| FAM128B  | 349797  | 593 | 22  | 388396  | 131720 | 0 | 0 | 0 | 0 | 50 | 45  | 22118992 | 1 | 1 |
| FAM131C  | 876105  | 197 | 40  | 722324  | 203632 | 0 | 0 | 0 | 0 | 50 | 65  | 21358576 | 1 | 1 |
| FAM136A  | 671278  | 370 | 38  | 367392  | 88644  | 0 | 0 | 0 | 0 | 50 | 76  | 25574328 | 1 | 1 |
| FAM136B  | NaN     | NaN | NaN | 356000  | 87220  | 0 | 0 | 0 | 0 | 50 | 116 | 39732804 | 1 | 1 |
| FAM149B1 | NaN     | NaN | NaN | 1504100 | 419368 | 0 | 0 | 0 | 0 | 50 | 116 | 40064952 | 1 | 1 |
| FAM150A  | 105913  | 682 | -11 | 333928  | 99680  | 0 | 0 | 1 | 0 | 14 | 20  | 7447520  | 1 | 1 |
| FAM153A  | 1267336 | 553 | 18  | 868284  | 209328 | 0 | 0 | 0 | 0 | 50 | 70  | 20646220 | 1 | 1 |
| FAM153C  | 961008  | 363 | 32  | 325028  | 77608  | 0 | 0 | 0 | 0 | 50 | 53  | 18751944 | 1 | 1 |
| FAM154A  | 500270  | 450 | -18 | 1206128 | 328588 | 0 | 0 | 0 | 0 | 0  | 0   | 328588   | 1 | 1 |
| FAM154B  | 382946  | 701 | 18  | 1023856 | 265220 | 0 | 0 | 0 | 0 | 50 | 79  | 28686124 | 1 | 1 |
| FAM155B  | 74378   | NaN | 23  | 1162340 | 363832 | 0 | 0 | 2 | 0 | 50 | 51  | 18505236 | 1 | 1 |
| FAM156A  | NaN     | NaN | NaN | 1053760 | 317552 | 0 | 0 | 0 | 0 | 50 | 116 | 39963136 | 1 | 1 |
| FAM156B  | NaN     | NaN | NaN | 1053760 | 317552 | 0 | 0 | 0 | 0 | 50 | 116 | 39963136 | 1 | 1 |
| FAM157A  | NaN     | NaN | NaN | 966540  | 289428 | 0 | 0 | 0 | 0 | 50 | 116 | 39935012 | 1 | 1 |
| FAM157B  | NaN     | NaN | NaN | 965472  | 293700 | 0 | 0 | 0 | 0 | 50 | 116 | 39939284 | 1 | 1 |
| FAM158A  | 974559  | 220 | 41  | 537560  | 156640 | 0 | 0 | 0 | 0 | 50 | 62  | 24565780 | 1 | 1 |
| FAM159B  | NaN     | NaN | NaN | 415452  | 108936 | 0 | 0 | 0 | 0 | 50 | 116 | 39754520 | 1 | 1 |
| FAM160A1 | NaN     | NaN | NaN | 2635468 | 742616 | 0 | 0 | 0 | 0 | 7  | 14  | 4430776  | 1 | 1 |
| FAM164A  | 49383   | 969 | 2   | 846212  | 234604 | 0 | 0 | 0 | 0 | 50 | 59  | 22499912 | 1 | 1 |

|          |         |      |     |         |         |   |   |   |   |    |     |          |   |   |
|----------|---------|------|-----|---------|---------|---|---|---|---|----|-----|----------|---|---|
| FAM164C  | 919043  | 222  | 47  | 1154508 | 318264  | 0 | 0 | 0 | 0 | 25 | 41  | 16456812 | 1 | 1 |
| FAM165B  | 410767  | 518  | 61  | 163404  | 38448   | 0 | 0 | 0 | 0 | 50 | 51  | 13682860 | 1 | 1 |
| FAM167A  | 483148  | 520  | 43  | 530084  | 163048  | 0 | 0 | 1 | 0 | 50 | 62  | 21466088 | 1 | 1 |
| FAM168A  | 521861  | 311  | 48  | 606624  | 179424  | 0 | 0 | 0 | 0 | 50 | 50  | 21501688 | 1 | 1 |
| FAM170B  | NaN     | NaN  | NaN | 719832  | 196512  | 0 | 0 | 0 | 0 | 50 | 116 | 39842096 | 1 | 1 |
| FAM171A2 | NaN     | NaN  | NaN | 1973308 | 706304  | 0 | 0 | 0 | 0 | 7  | 14  | 4394464  | 1 | 1 |
| FAM173A  | 1207790 | 194  | 33  | 568176  | 209328  | 0 | 0 | 0 | 0 | 50 | 77  | 22508812 | 1 | 1 |
| FAM174B  | 281213  | 478  | -17 | 384124  | 137060  | 0 | 0 | 0 | 0 | 50 | 87  | 23793616 | 1 | 1 |
| FAM175A  | 275241  | 378  | 29  | 1085800 | 264152  | 0 | 0 | 0 | 0 | 50 | 47  | 22805716 | 1 | 1 |
| FAM176A  | 224734  | 608  | 8   | 386616  | 112140  | 0 | 0 | 0 | 0 | 50 | 54  | 23225084 | 1 | 1 |
| FAM176B  | 685495  | 212  | 32  | 403348  | 137060  | 0 | 0 | 0 | 0 | 50 | 43  | 18907872 | 1 | 1 |
| FAM178B  | 677234  | 392  | 46  | 1762912 | 517268  | 0 | 0 | 0 | 0 | 42 | 30  | 17765112 | 1 | 1 |
| FAM180B  | NaN     | NaN  | NaN | 456748  | 143468  | 0 | 0 | 0 | 0 | 50 | 116 | 39789052 | 1 | 1 |
| FAM183A  | 1068006 | 294  | 30  | 362408  | 87220   | 0 | 0 | 0 | 0 | 50 | 45  | 20299476 | 1 | 1 |
| FAM184B  | NaN     | NaN  | NaN | 2740844 | 731224  | 0 | 0 | 0 | 0 | 7  | 14  | 4419384  | 1 | 1 |
| FAM185A  | NaN     | NaN  | NaN | 996088  | 292988  | 0 | 0 | 0 | 0 | 50 | 116 | 39938572 | 1 | 1 |
| FAM186A  | NaN     | NaN  | NaN | 5877204 | 1690644 | 0 | 0 | 0 | 0 | 0  | 0   | 1690644  | 1 | 1 |
| FAM189A1 | NaN     | NaN  | NaN | 1338560 | 434320  | 0 | 0 | 0 | 0 | 50 | 116 | 40079904 | 1 | 1 |
| FAM18A   | 258562  | 356  | 36  | 564972  | 148452  | 0 | 0 | 0 | 0 | 50 | 51  | 18027128 | 1 | 1 |
| FAM18B   | 832902  | 284  | -7  | 551088  | 136704  | 0 | 0 | 0 | 0 | 50 | 64  | 19453264 | 1 | 1 |
| FAM18B2  | 457998  | 452  | -34 | 839092  | 232112  | 0 | 0 | 0 | 0 | 50 | 67  | 19233256 | 1 | 1 |
| FAM190A  | 104011  | 1180 | -4  | 2312220 | 645072  | 0 | 0 | 0 | 0 | 7  | 6   | 3797096  | 1 | 1 |
| FAM190B  | 215927  | 942  | 1   | 2161632 | 556428  | 0 | 0 | 0 | 0 | 13 | 33  | 8832360  | 1 | 1 |
| FAM192A  | 731638  | 149  | 48  | 671416  | 171236  | 0 | 0 | 2 | 0 | 18 | 13  | 4999308  | 1 | 1 |
| FAM194A  | 359484  | 397  | 30  | 1743688 | 443576  | 0 | 0 | 0 | 0 | 50 | 51  | 23959156 | 1 | 1 |
| FAM194B  | NaN     | NaN  | NaN | 1840164 | 448560  | 0 | 0 | 0 | 0 | 50 | 116 | 40094144 | 1 | 1 |
| FAM196B  | NaN     | NaN  | NaN | 1336068 | 389820  | 0 | 0 | 0 | 0 | 50 | 116 | 40035404 | 1 | 1 |
| FAM198A  | NaN     | NaN  | NaN | 1412252 | 450340  | 0 | 0 | 0 | 0 | 50 | 116 | 40095924 | 1 | 1 |
| FAM19A1  | 121492  | 954  | -14 | 354932  | 91492   | 0 | 0 | 1 | 0 | 1  | 1   | 326096   | 1 | 1 |
| FAM19A3  | 559669  | 325  | 27  | 461732  | 98968   | 0 | 0 | 0 | 0 | 50 | 65  | 23160292 | 1 | 1 |
| FAM200A  | 1460222 | 332  | 56  | 1467076 | 376292  | 0 | 0 | 0 | 0 | 42 | 54  | 14660080 | 1 | 1 |
| FAM200B  | NaN     | NaN  | NaN | 1679252 | 428980  | 0 | 0 | 0 | 0 | 50 | 116 | 40074564 | 1 | 1 |
| FAM20C   | 195067  | 593  | -4  | 694556  | 237808  | 0 | 0 | 0 | 0 | 50 | 57  | 20503464 | 1 | 1 |

|         |        |      |     |         |         |   |   |   |   |    |     |          |   |   |
|---------|--------|------|-----|---------|---------|---|---|---|---|----|-----|----------|---|---|
| FAM21B  | 109302 | 804  | 30  | 6545060 | 1729804 | 0 | 0 | 0 | 0 | 0  | 0   | 1729804  | 1 | 1 |
| FAM22A  | 409986 | 144  | 20  | 2134576 | 707372  | 0 | 0 | 0 | 0 | 14 | 10  | 8104696  | 1 | 1 |
| FAM22D  | 490965 | 332  | 22  | 1367040 | 446424  | 0 | 0 | 0 | 0 | 6  | 3   | 2543264  | 1 | 1 |
| FAM22F  | 219475 | 445  | 31  | 1843012 | 610184  | 0 | 0 | 0 | 0 | 6  | 3   | 2037032  | 1 | 1 |
| FAM22G  | 309543 | 582  | 27  | 1838384 | 610540  | 0 | 0 | 0 | 0 | 8  | 18  | 4384496  | 1 | 1 |
| FAM23A  | 278936 | 286  | 5   | 1747960 | 537560  | 0 | 0 | 0 | 0 | 50 | 54  | 23607072 | 1 | 1 |
| FAM24B  | 290558 | 619  | 14  | 244572  | 68352   | 0 | 0 | 0 | 0 | 18 | 28  | 7230360  | 1 | 1 |
| FAM25A  | NaN    | NaN  | NaN | 236028  | 65148   | 0 | 0 | 0 | 0 | 50 | 116 | 39710732 | 1 | 1 |
| FAM25B  | NaN    | NaN  | NaN | 708084  | 195444  | 0 | 0 | 0 | 0 | 50 | 116 | 39841028 | 1 | 1 |
| FAM25C  | NaN    | NaN  | NaN | 708084  | 195444  | 0 | 0 | 0 | 0 | 50 | 116 | 39841028 | 1 | 1 |
| FAM25G  | 102837 | 642  | 23  | 708084  | 195444  | 0 | 0 | 0 | 0 | 50 | 41  | 21078048 | 1 | 1 |
| FAM26F  | 261319 | 541  | 34  | 779284  | 243860  | 0 | 0 | 0 | 0 | 50 | 48  | 19636960 | 1 | 1 |
| FAM32A  | 787753 | 219  | 34  | 305092  | 71912   | 0 | 0 | 0 | 0 | 50 | 45  | 17714204 | 1 | 1 |
| FAM36A  | 694721 | 405  | 3   | 313992  | 80100   | 0 | 0 | 0 | 0 | 50 | 40  | 17173440 | 1 | 1 |
| FAM38A  | NaN    | NaN  | NaN | 6353532 | 1940556 | 0 | 0 | 0 | 0 | 0  | 0   | 1940556  | 1 | 1 |
| FAM38B  | 90278  | 610  | 30  | 7185148 | 1853336 | 0 | 0 | 0 | 0 | 2  | 0   | 2160920  | 1 | 1 |
| FAM40A  | 660515 | 373  | 29  | 2182636 | 589892  | 0 | 0 | 0 | 0 | 3  | 5   | 1719836  | 1 | 1 |
| FAM40B  | 625985 | 286  | 38  | 2190112 | 595232  | 0 | 0 | 0 | 0 | 10 | 12  | 4697420  | 1 | 1 |
| FAM47E  | NaN    | NaN  | NaN | 1020296 | 274120  | 0 | 0 | 0 | 0 | 50 | 116 | 39919704 | 1 | 1 |
| FAM48A  | 166443 | 631  | 23  | 2088652 | 522608  | 0 | 0 | 0 | 0 | 24 | 26  | 11347500 | 1 | 1 |
| FAM48B1 | 644763 | NaN  | 34  | 2156648 | 687436  | 0 | 0 | 0 | 0 | 7  | 1   | 4598808  | 1 | 1 |
| FAM48B2 | 644763 | NaN  | 34  | 1983632 | 636172  | 0 | 0 | 0 | 0 | 7  | 1   | 4598808  | 1 | 1 |
| FAM54A  | 283639 | 240  | 15  | 997512  | 269136  | 0 | 0 | 0 | 0 | 43 | 49  | 16499176 | 1 | 1 |
| FAM54B  | 746382 | 372  | 24  | 783912  | 180492  | 0 | 0 | 0 | 0 | 50 | 64  | 28906488 | 1 | 1 |
| FAM55A  | 103922 | 612  | -15 | 1040944 | 272696  | 0 | 0 | 0 | 0 | 50 | 51  | 23797176 | 1 | 1 |
| FAM55B  | NaN    | NaN  | NaN | 1449276 | 368460  | 0 | 0 | 0 | 0 | 50 | 116 | 40014044 | 1 | 1 |
| FAM55C  | 549022 | 421  | 12  | 1408336 | 402992  | 0 | 0 | 0 | 0 | 1  | 0   | 660380   | 1 | 1 |
| FAM55D  | 109030 | 716  | -17 | 1395164 | 372376  | 0 | 0 | 0 | 0 | 4  | 11  | 3451064  | 1 | 1 |
| FAM58B  | 137061 | 607  | 1   | 625848  | 186900  | 0 | 0 | 0 | 0 | 50 | 49  | 20648000 | 1 | 1 |
| FAM59A  | 268182 | 781  | -5  | 2183348 | 646852  | 0 | 0 | 0 | 0 | 9  | 9   | 6348904  | 1 | 1 |
| FAM59B  | NaN    | NaN  | NaN | 2092924 | 731936  | 0 | 0 | 0 | 0 | 7  | 14  | 4420096  | 1 | 1 |
| FAM5B   | 5755   | 900  | -14 | 1968324 | 573516  | 0 | 0 | 0 | 0 | 16 | 24  | 8691740  | 1 | 1 |
| FAM5C   | 6711   | 1261 | -26 | 1961560 | 525812  | 0 | 0 | 0 | 0 | 3  | 2   | 1318268  | 1 | 1 |

|          |         |      |     |          |         |   |   |   |   |    |     |          |   |   |
|----------|---------|------|-----|----------|---------|---|---|---|---|----|-----|----------|---|---|
| FAM64A   | 249769  | 359  | 6   | 601996   | 185120  | 0 | 0 | 0 | 0 | 50 | 56  | 19275264 | 1 | 1 |
| FAM69A   | 609398  | 372  | 13  | 1110008  | 283732  | 0 | 0 | 0 | 0 | 36 | 41  | 14510204 | 1 | 1 |
| FAM69B   | 1898901 | 190  | 39  | 1054472  | 348880  | 0 | 0 | 0 | 0 | 50 | 67  | 24888672 | 1 | 1 |
| FAM70A   | 526128  | NaN  | 22  | 895340   | 264508  | 0 | 0 | 0 | 0 | 50 | 50  | 19240732 | 1 | 1 |
| FAM70B   | 782003  | 465  | 45  | 818444   | 267712  | 0 | 0 | 0 | 0 | 50 | 51  | 21146400 | 1 | 1 |
| FAM71E1  | 1038277 | 491  | 30  | 576720   | 185832  | 0 | 0 | 1 | 0 | 50 | 64  | 20883672 | 1 | 1 |
| FAM71E2  | NaN     | NaN  | NaN | 2266652  | 733360  | 0 | 0 | 0 | 0 | 7  | 14  | 4421520  | 1 | 1 |
| FAM72A   | 783744  | 442  | 11  | 396584   | 96832   | 0 | 0 | 0 | 0 | 50 | 56  | 17077320 | 1 | 1 |
| FAM72B   | 398623  | NaN  | 14  | 396940   | 96476   | 0 | 0 | 0 | 0 | 50 | 58  | 19600292 | 1 | 1 |
| FAM72D   | NaN     | NaN  | NaN | 395516   | 97900   | 0 | 0 | 0 | 0 | 50 | 116 | 39743484 | 1 | 1 |
| FAM75A1  | NaN     | NaN  | NaN | 6668948  | 1998940 | 0 | 0 | 0 | 0 | 0  | 0   | 1998940  | 1 | 1 |
| FAM75A2  | 18945   | NaN  | -38 | 6668948  | 1998940 | 0 | 0 | 0 | 0 | 2  | 0   | 2282672  | 1 | 1 |
| FAM75A3  | 17308   | 1040 | -46 | 3334296  | 999648  | 0 | 0 | 0 | 0 | 3  | 1   | 2386980  | 1 | 1 |
| FAM75A5  | NaN     | NaN  | NaN | 10002532 | 2999300 | 0 | 0 | 0 | 0 | 0  | 0   | 2999300  | 1 | 1 |
| FAM75A6  | NaN     | NaN  | NaN | 3325396  | 995732  | 0 | 0 | 0 | 0 | 0  | 0   | 995732   | 1 | 1 |
| FAM75A7  | NaN     | NaN  | NaN | 10002532 | 2999300 | 0 | 0 | 0 | 0 | 0  | 0   | 2999300  | 1 | 1 |
| FAM75C1  | NaN     | NaN  | NaN | 2922048  | 902460  | 0 | 0 | 0 | 0 | 5  | 8   | 3274488  | 1 | 1 |
| FAM82A1  | 664248  | 420  | 27  | 1942336  | 488432  | 0 | 0 | 0 | 0 | 7  | 6   | 3242448  | 1 | 1 |
| FAM82A2  | 1011507 | 172  | 46  | 1208976  | 351372  | 0 | 0 | 0 | 0 | 15 | 14  | 6826656  | 1 | 1 |
| FAM82B   | 192988  | 1166 | 15  | 830548   | 217160  | 0 | 0 | 0 | 0 | 50 | 37  | 15740540 | 1 | 1 |
| FAM83A   | 519858  | 171  | 22  | 1132436  | 352084  | 0 | 0 | 0 | 0 | 50 | 65  | 19013604 | 1 | 1 |
| FAM86A   | 552298  | 419  | 3   | 838024   | 254540  | 0 | 0 | 0 | 0 | 50 | 50  | 19837032 | 1 | 1 |
| FAM86B2  | NaN     | NaN  | NaN | 838736   | 251692  | 0 | 0 | 0 | 0 | 50 | 116 | 39897276 | 1 | 1 |
| FAM86C   | 726153  | 465  | 35  | 500536   | 141332  | 0 | 0 | 0 | 0 | 50 | 52  | 23166700 | 1 | 1 |
| FAM89A   | 376655  | 616  | 12  | 445712   | 153436  | 0 | 0 | 1 | 0 | 50 | 64  | 20436536 | 1 | 1 |
| FAM89B   | 3945819 | 202  | 45  | 507300   | 116412  | 0 | 0 | 0 | 0 | 19 | 25  | 9711324  | 1 | 1 |
| FAM90A10 | NaN     | NaN  | NaN | 1138488  | 363120  | 0 | 0 | 0 | 0 | 50 | 116 | 40008704 | 1 | 1 |
| FAM90A13 | NaN     | NaN  | NaN | 3412972  | 1091852 | 0 | 0 | 0 | 0 | 0  | 0   | 1091852  | 1 | 1 |
| FAM90A14 | NaN     | NaN  | NaN | 3412972  | 1091852 | 0 | 0 | 0 | 0 | 0  | 0   | 1091852  | 1 | 1 |
| FAM90A18 | NaN     | NaN  | NaN | 2277688  | 725528  | 0 | 0 | 0 | 0 | 7  | 14  | 4413688  | 1 | 1 |
| FAM90A19 | NaN     | NaN  | NaN | 2277688  | 725528  | 0 | 0 | 0 | 0 | 7  | 14  | 4413688  | 1 | 1 |
| FAM90A20 | NaN     | NaN  | NaN | 1137420  | 364188  | 0 | 0 | 0 | 0 | 50 | 116 | 40009772 | 1 | 1 |
| FAM90A5  | NaN     | NaN  | NaN | 1137776  | 363832  | 0 | 0 | 0 | 0 | 50 | 116 | 40009416 | 1 | 1 |

|          |         |     |     |         |        |   |   |   |   |    |     |          |   |   |
|----------|---------|-----|-----|---------|--------|---|---|---|---|----|-----|----------|---|---|
| FAM90A7  | NaN     | NaN | NaN | 2275552 | 729800 | 0 | 0 | 0 | 0 | 7  | 14  | 4417960  | 1 | 1 |
| FAM90A8  | NaN     | NaN | NaN | 1137420 | 364188 | 0 | 0 | 0 | 0 | 50 | 116 | 40009772 | 1 | 1 |
| FAM90A9  | NaN     | NaN | NaN | 1138132 | 363476 | 0 | 0 | 0 | 0 | 50 | 116 | 40009060 | 1 | 1 |
| FAM92B   | 553233  | 273 | 36  | 792812  | 214312 | 0 | 0 | 1 | 0 | 0  | 1   | 214312   | 1 | 1 |
| FAM9A    | 13530   | NaN | -19 | 895340  | 210040 | 0 | 0 | 0 | 0 | 50 | 85  | 21689656 | 1 | 1 |
| FBRS     | 2255010 | 158 | 60  | 1127808 | 391956 | 0 | 0 | 0 | 0 | 12 | 15  | 4690300  | 1 | 1 |
| FBRSL1   | NaN     | NaN | NaN | 2544332 | 875404 | 0 | 0 | 0 | 0 | 7  | 14  | 4563564  | 1 | 1 |
| FBXL15   | 975992  | 178 | 39  | 717340  | 259880 | 0 | 0 | 0 | 0 | 50 | 84  | 25980880 | 1 | 1 |
| FBXO44   | 682357  | 264 | 32  | 749736  | 126024 | 0 | 0 | 1 | 0 | 8  | 13  | 3283032  | 1 | 1 |
| FCAMR    | 467960  | 385 | 26  | 1467076 | 419012 | 0 | 0 | 0 | 0 | 7  | 6   | 1940912  | 1 | 1 |
| FCER2    | 688482  | 384 | 31  | 852264  | 222144 | 0 | 0 | 1 | 0 | 50 | 67  | 22649432 | 1 | 1 |
| FCF1     | 886320  | 184 | 43  | 544680  | 127092 | 0 | 0 | 1 | 0 | 50 | 49  | 19127880 | 1 | 1 |
| FCGR1B   | 285005  | NaN | 8   | 727308  | 192240 | 0 | 0 | 0 | 0 | 50 | 56  | 22934944 | 1 | 1 |
| FCGR3A   | 693228  | 503 | 23  | 748668  | 200784 | 0 | 0 | 0 | 0 | 50 | 68  | 21398092 | 1 | 1 |
| FCRLB    | 598281  | 504 | 20  | 1045572 | 346032 | 0 | 0 | 3 | 0 | 28 | 32  | 9012496  | 1 | 1 |
| FDFT1    | 470737  | 360 | 34  | 1084732 | 284444 | 0 | 0 | 0 | 0 | 50 | 50  | 17460376 | 1 | 1 |
| FDX1     | 137098  | 403 | 6   | 457460  | 148096 | 0 | 0 | 0 | 0 | 50 | 34  | 17565396 | 1 | 1 |
| FDX1L    | 1802015 | 191 | 21  | 463512  | 145248 | 0 | 0 | 0 | 0 | 50 | 98  | 25785436 | 1 | 1 |
| FEM1B    | 376557  | 437 | 37  | 1571384 | 447136 | 0 | 0 | 2 | 0 | 50 | 62  | 19016808 | 1 | 1 |
| FEV      | 922162  | 386 | 35  | 588468  | 185832 | 0 | 0 | 0 | 0 | 50 | 52  | 18596728 | 1 | 1 |
| FFAR1    | 767113  | 472 | 9   | 698116  | 270560 | 0 | 0 | 0 | 0 | 32 | 25  | 10097228 | 1 | 1 |
| FFAR2    | 827597  | 367 | 29  | 793524  | 267000 | 0 | 0 | 2 | 0 | 32 | 37  | 12083352 | 1 | 1 |
| FGF17    | 584373  | 219 | 34  | 559988  | 154504 | 0 | 0 | 0 | 0 | 50 | 59  | 21330096 | 1 | 1 |
| FGF18    | 300840  | 347 | 30  | 533288  | 150232 | 0 | 0 | 1 | 0 | 50 | 43  | 20088724 | 1 | 1 |
| FGF2     | 139927  | 184 | 18  | 689216  | 247420 | 0 | 0 | 1 | 0 | 50 | 50  | 19092636 | 1 | 1 |
| FGF20    | 176882  | 719 | -38 | 527592  | 160200 | 0 | 0 | 1 | 0 | 23 | 39  | 12397700 | 1 | 1 |
| FGF22    | 1832767 | 218 | 10  | 409044  | 146316 | 0 | 0 | 0 | 0 | 29 | 50  | 17004696 | 1 | 1 |
| FGFBP1   | 175145  | 435 | 33  | 591672  | 165540 | 0 | 0 | 1 | 0 | 50 | 69  | 24440468 | 1 | 1 |
| FGFBP3   | 355265  | 331 | 24  | 616592  | 217516 | 0 | 0 | 0 | 0 | 50 | 45  | 21612048 | 1 | 1 |
| FGFR1OP2 | 408842  | 320 | 24  | 682096  | 164828 | 0 | 0 | 0 | 0 | 50 | 58  | 22459684 | 1 | 1 |
| FHAD1    | NaN     | NaN | NaN | 3735508 | 919904 | 0 | 0 | 0 | 0 | 5  | 8   | 3291932  | 1 | 1 |
| FHL3     | 445132  | 232 | 42  | 732292  | 189392 | 0 | 0 | 0 | 0 | 50 | 34  | 17924600 | 1 | 1 |
| FIGNL2   | 570716  | 438 | 22  | 1517628 | 579924 | 0 | 0 | 0 | 0 | 15 | 19  | 8128192  | 1 | 1 |

|          |         |      |     |         |         |   |   |   |   |    |     |          |   |   |
|----------|---------|------|-----|---------|---------|---|---|---|---|----|-----|----------|---|---|
| FIZ1     | 1077402 | 254  | -10 | 1186192 | 414740  | 0 | 0 | 2 | 0 | 8  | 8   | 2559640  | 1 | 1 |
| FKBP1B   | 243145  | 226  | 33  | 323604  | 86508   | 0 | 0 | 0 | 0 | 50 | 59  | 18078748 | 1 | 1 |
| FKSG83   | 161388  | 645  | 24  | 485228  | 123532  | 0 | 0 | 0 | 0 | 50 | 40  | 20718132 | 1 | 1 |
| FKTN     | 215248  | 637  | -5  | 1214672 | 304024  | 0 | 0 | 0 | 0 | 50 | 48  | 24787568 | 1 | 1 |
| FLJ10357 | 937278  | 320  | 20  | 3718064 | 1252408 | 0 | 0 | 0 | 0 | 4  | 0   | 2192248  | 1 | 1 |
| FLJ25363 | NaN     | NaN  | NaN | 257388  | 68352   | 0 | 0 | 0 | 0 | 50 | 116 | 39713936 | 1 | 1 |
| FLJ35220 | 748790  | 222  | 29  | 796016  | 247420  | 0 | 0 | 0 | 0 | 50 | 66  | 20942056 | 1 | 1 |
| FLJ36031 | 276499  | 628  | 22  | 553936  | 202208  | 0 | 0 | 0 | 0 | 8  | 4   | 3221088  | 1 | 1 |
| FLJ37543 | 166738  | 437  | -1  | 341048  | 91492   | 0 | 0 | 0 | 0 | 50 | 61  | 23208708 | 1 | 1 |
| FLJ43859 | NaN     | NaN  | NaN | 2274484 | 681740  | 0 | 0 | 0 | 0 | 7  | 14  | 4369900  | 1 | 1 |
| FLJ43860 | 153254  | 382  | 38  | 3399800 | 952300  | 0 | 0 | 0 | 0 | 1  | 0   | 1261664  | 1 | 1 |
| FLJ44082 | NaN     | NaN  | NaN | 2274484 | 681740  | 0 | 0 | 0 | 0 | 7  | 14  | 4369900  | 1 | 1 |
| FLJ44606 | NaN     | NaN  | NaN | 519048  | 130296  | 0 | 0 | 0 | 0 | 50 | 116 | 39775880 | 1 | 1 |
| FLJ44635 | 582710  | NaN  | 53  | 368104  | 87932   | 0 | 0 | 0 | 0 | 50 | 77  | 18724888 | 1 | 1 |
| FLJ46321 | 37702   | 928  | -45 | 3912084 | 1157712 | 0 | 0 | 0 | 0 | 4  | 1   | 2283740  | 1 | 1 |
| FLT3LG   | 2173457 | 290  | 44  | 595588  | 194732  | 0 | 0 | 0 | 0 | 50 | 67  | 19850560 | 1 | 1 |
| FLYWCH2  | 1537882 | 210  | 47  | 349236  | 111072  | 0 | 0 | 0 | 0 | 50 | 56  | 20433332 | 1 | 1 |
| FNDC4    | 1193266 | 306  | 39  | 594164  | 184408  | 0 | 0 | 1 | 0 | 1  | 4   | 646140   | 1 | 1 |
| FNDC5    | 1019374 | 232  | 15  | 423284  | 109648  | 0 | 0 | 0 | 0 | 50 | 66  | 21117564 | 1 | 1 |
| FNTB     | 501431  | 387  | 39  | 1136708 | 313636  | 0 | 0 | 3 | 0 | 17 | 33  | 6506612  | 1 | 1 |
| FOLH1B   | 116674  | 1062 | -16 | 1172664 | 297972  | 0 | 0 | 0 | 0 | 50 | 67  | 24992268 | 1 | 1 |
| FOLR1    | 744547  | 182  | 58  | 677468  | 168388  | 0 | 0 | 0 | 0 | 49 | 67  | 18790748 | 1 | 1 |
| FOLR2    | 744547  | 182  | 58  | 677468  | 164116  | 0 | 0 | 1 | 0 | 50 | 69  | 18856964 | 1 | 1 |
| FOLR4    | 424538  | 765  | -12 | 629764  | 163760  | 0 | 0 | 0 | 0 | 50 | 54  | 17810324 | 1 | 1 |
| FOXB1    | 573015  | 427  | 14  | 795660  | 255252  | 0 | 0 | 0 | 0 | 50 | 52  | 20013252 | 1 | 1 |
| FOXD1    | 476449  | 473  | 34  | 1079392 | 410468  | 0 | 0 | 0 | 0 | 45 | 45  | 18751944 | 1 | 1 |
| FOXD4L2  | NaN     | NaN  | NaN | 2000720 | 671416  | 0 | 0 | 0 | 0 | 7  | 14  | 4359576  | 1 | 1 |
| FOXJ1    | 94287   | 650  | 24  | 944824  | 275900  | 0 | 0 | 0 | 0 | 50 | 46  | 20691432 | 1 | 1 |
| FOXJ1    | 1796815 | 218  | 28  | 1017448 | 338912  | 0 | 0 | 1 | 0 | 50 | 79  | 21856264 | 1 | 1 |
| FOXO3    | 346225  | 428  | 34  | 1652552 | 515488  | 0 | 0 | 1 | 0 | 50 | 55  | 21562564 | 1 | 1 |
| FRA10AC1 | 471978  | 399  | 17  | 891780  | 174084  | 0 | 0 | 1 | 0 | 50 | 57  | 20017168 | 1 | 1 |
| FRAT1    | 903121  | 397  | 31  | 643292  | 253828  | 0 | 0 | 0 | 0 | 50 | 44  | 16656884 | 1 | 1 |
| FRAT2    | 903121  | 397  | 31  | 538984  | 210752  | 0 | 0 | 0 | 0 | 50 | 44  | 16656884 | 1 | 1 |



|         |         |      |     |         |         |   |   |   |   |    |     |          |   |   |
|---------|---------|------|-----|---------|---------|---|---|---|---|----|-----|----------|---|---|
| FREM3   | NaN     | NaN  | NaN | 5298704 | 1587760 | 0 | 0 | 0 | 0 | 0  | 0   | 1587760  | 1 | 1 |
| FRG1    | 49764   | 1059 | -15 | 706304  | 159844  | 0 | 0 | 2 | 0 | 5  | 11  | 2707736  | 1 | 1 |
| FSD1L   | NaN     | NaN  | NaN | 1494488 | 361696  | 0 | 0 | 0 | 0 | 50 | 116 | 40007280 | 1 | 1 |
| FSHB    | 28139   | 1007 | -29 | 341048  | 84016   | 0 | 0 | 0 | 0 | 50 | 117 | 22416964 | 1 | 1 |
| FTSJ1   | 726793  | NaN  | 2   | 868996  | 241724  | 0 | 0 | 1 | 0 | 50 | 78  | 22575384 | 1 | 1 |
| FTSJD1  | 420704  | 736  | 3   | 1961916 | 512640  | 0 | 0 | 0 | 0 | 25 | 23  | 9439340  | 1 | 1 |
| FTSJD2  | 498007  | 434  | 43  | 2205420 | 571380  | 0 | 0 | 0 | 0 | 2  | 1   | 969388   | 1 | 1 |
| FUT7    | 1951939 | 202  | 40  | 828412  | 279104  | 0 | 0 | 0 | 0 | 50 | 61  | 21392396 | 1 | 1 |
| FXC1    | 425139  | 491  | 23  | 266288  | 77608   | 0 | 0 | 0 | 0 | 0  | 0   | 77608    | 1 | 1 |
| FXN     | 196497  | 491  | 27  | 594164  | 145960  | 0 | 0 | 0 | 0 | 50 | 50  | 21521980 | 1 | 1 |
| FXYD1   | 745516  | 357  | -9  | 263796  | 64080   | 0 | 0 | 1 | 0 | 3  | 2   | 401568   | 1 | 1 |
| FXYD2   | 516252  | 624  | 54  | 448916  | 126736  | 0 | 0 | 0 | 0 | 16 | 13  | 3406564  | 1 | 1 |
| FXYD7   | 745516  | 357  | -9  | 225348  | 57672   | 0 | 0 | 0 | 0 | 50 | 54  | 17856960 | 1 | 1 |
| G0S2    | 218767  | 300  | 12  | 254184  | 83304   | 0 | 0 | 0 | 0 | 50 | 47  | 18085156 | 1 | 1 |
| ABARAPI | 397577  | 398  | 18  | 316840  | 74048   | 0 | 0 | 0 | 0 | 50 | 59  | 21415536 | 1 | 1 |
| ABARAPI | 449343  | 354  | 18  | 315772  | 75116   | 0 | 0 | 0 | 0 | 50 | 60  | 21330452 | 1 | 1 |
| GABRR2  | 415409  | 541  | 41  | 1274124 | 335352  | 0 | 0 | 2 | 0 | 50 | 64  | 19924252 | 1 | 1 |
| GADD45B | 1604277 | 267  | 35  | 414740  | 113920  | 0 | 0 | 0 | 0 | 50 | 58  | 22805716 | 1 | 1 |
| GAGE1   | 493560  | NaN  | 3   | 400144  | 96476   | 0 | 0 | 0 | 0 | 50 | 56  | 21881896 | 1 | 1 |
| GAGE10  | 547555  | NaN  | 25  | 315416  | 78676   | 0 | 0 | 0 | 0 | 50 | 45  | 20590684 | 1 | 1 |
| GAGE12B | NaN     | NaN  | NaN | 978644  | 226060  | 0 | 0 | 0 | 0 | 50 | 116 | 39871644 | 1 | 1 |
| GAGE12C | NaN     | NaN  | NaN | 1895344 | 446780  | 0 | 0 | 0 | 0 | 50 | 116 | 40092364 | 1 | 1 |
| GAGE12D | NaN     | NaN  | NaN | 1950880 | 453188  | 0 | 0 | 0 | 0 | 50 | 116 | 40098772 | 1 | 1 |
| GAGE12E | NaN     | NaN  | NaN | 1950880 | 453188  | 0 | 0 | 0 | 0 | 50 | 116 | 40098772 | 1 | 1 |
| GAGE12F | NaN     | NaN  | NaN | 915276  | 221076  | 0 | 0 | 0 | 0 | 50 | 116 | 39866660 | 1 | 1 |
| GAGE12G | NaN     | NaN  | NaN | 1627632 | 378072  | 0 | 0 | 0 | 0 | 50 | 116 | 40023656 | 1 | 1 |
| GAGE12H | NaN     | NaN  | NaN | 1301892 | 301176  | 0 | 0 | 0 | 0 | 50 | 116 | 39946760 | 1 | 1 |
| GAGE12I | NaN     | NaN  | NaN | 324672  | 75828   | 0 | 0 | 0 | 0 | 50 | 116 | 39721412 | 1 | 1 |
| GAGE13  | NaN     | NaN  | NaN | 322536  | 76896   | 0 | 0 | 0 | 0 | 50 | 116 | 39722480 | 1 | 1 |
| GAGE2A  | NaN     | NaN  | NaN | 1278396 | 308652  | 0 | 0 | 0 | 0 | 50 | 116 | 39954236 | 1 | 1 |
| GAGE2B  | NaN     | NaN  | NaN | 315772  | 77252   | 0 | 0 | 0 | 0 | 50 | 116 | 39722836 | 1 | 1 |
| GAGE2C  | NaN     | NaN  | NaN | 1277684 | 308296  | 0 | 0 | 0 | 0 | 50 | 116 | 39953880 | 1 | 1 |
| GAGE2D  | NaN     | NaN  | NaN | 959776  | 231044  | 0 | 0 | 0 | 0 | 50 | 116 | 39876628 | 1 | 1 |

|         |         |     |     |         |        |   |   |   |   |    |     |          |   |   |
|---------|---------|-----|-----|---------|--------|---|---|---|---|----|-----|----------|---|---|
| GAGE2E  | NaN     | NaN | NaN | 1050912 | 257388 | 0 | 0 | 0 | 0 | 50 | 116 | 39902972 | 1 | 1 |
| GAGE4   | NaN     | NaN | NaN | 324672  | 75828  | 0 | 0 | 0 | 0 | 50 | 116 | 39721412 | 1 | 1 |
| GAGE5   | NaN     | NaN | NaN | 324672  | 75828  | 0 | 0 | 0 | 0 | 50 | 116 | 39721412 | 1 | 1 |
| GAGE6   | NaN     | NaN | NaN | 648988  | 152012 | 0 | 0 | 0 | 0 | 50 | 116 | 39797596 | 1 | 1 |
| GAGE7   | NaN     | NaN | NaN | 324672  | 75828  | 0 | 0 | 0 | 0 | 50 | 116 | 39721412 | 1 | 1 |
| GAGE8   | 541043  | NaN | 12  | 1053048 | 257388 | 0 | 0 | 0 | 0 | 50 | 69  | 23629500 | 1 | 1 |
| GAL     | 780720  | 354 | 49  | 321824  | 94696  | 0 | 0 | 0 | 0 | 50 | 63  | 21444016 | 1 | 1 |
| GALNT4  | NaN     | NaN | NaN | 1450344 | 404772 | 0 | 0 | 0 | 0 | 50 | 116 | 40050356 | 1 | 1 |
| GALNT9  | 838016  | 534 | 14  | 1526528 | 451408 | 0 | 0 | 0 | 0 | 10 | 22  | 5822024  | 1 | 1 |
| GALNTL1 | 909703  | 431 | 38  | 1451412 | 403704 | 0 | 0 | 0 | 0 | 0  | 0   | 403704   | 1 | 1 |
| GALNTL2 | 221698  | 444 | 17  | 1632260 | 456748 | 0 | 0 | 0 | 0 | 31 | 34  | 13237148 | 1 | 1 |
| GALNTL4 | 715278  | 720 | 16  | 1563196 | 427556 | 0 | 0 | 0 | 0 | 2  | 1   | 1767896  | 1 | 1 |
| GALR3   | 1385064 | 203 | 66  | 863300  | 327520 | 0 | 0 | 0 | 0 | 6  | 2   | 1790680  | 1 | 1 |
| GAMT    | 2319333 | 196 | 35  | 796372  | 242792 | 0 | 0 | 0 | 0 | 50 | 55  | 21725612 | 1 | 1 |
| GAS1    | 129795  | 431 | 10  | 821648  | 286936 | 0 | 0 | 0 | 0 | 50 | 62  | 21266372 | 1 | 1 |
| GAST    | 1617880 | 323 | 9   | 261304  | 76184  | 0 | 0 | 0 | 0 | 50 | 72  | 24149616 | 1 | 1 |
| GATA4   | 474662  | 360 | 27  | 1080104 | 360628 | 0 | 0 | 0 | 0 | 4  | 1   | 1047352  | 1 | 1 |
| GATAD1  | 708388  | 401 | 27  | 681740  | 200428 | 0 | 0 | 0 | 0 | 50 | 69  | 27239696 | 1 | 1 |
| GATSL1  | NaN     | NaN | NaN | 847636  | 243860 | 0 | 0 | 0 | 0 | 50 | 116 | 39889444 | 1 | 1 |
| GBGT1   | 1875784 | 397 | 51  | 877540  | 258812 | 0 | 0 | 0 | 0 | 50 | 62  | 18361056 | 1 | 1 |
| GBP2    | 337373  | 745 | 2   | 1546820 | 392668 | 0 | 0 | 1 | 0 | 50 | 62  | 23640892 | 1 | 1 |
| GCET2   | 268780  | 440 | 28  | 483092  | 118192 | 0 | 0 | 0 | 0 | 50 | 52  | 20365692 | 1 | 1 |
| GCFC1   | 389063  | 482 | 69  | 2494848 | 642936 | 0 | 0 | 0 | 0 | 1  | 0   | 924176   | 1 | 1 |
| GCG     | 95439   | 554 | 7   | 485228  | 116056 | 0 | 0 | 1 | 0 | 1  | 4   | 651480   | 1 | 1 |
| GCHFR   | 1011507 | 172 | 46  | 221432  | 61588  | 0 | 0 | 0 | 0 | 50 | 64  | 23154596 | 1 | 1 |
| GCNT7   | 264053  | 455 | -17 | 1097904 | 297972 | 0 | 0 | 0 | 0 | 50 | 65  | 20944192 | 1 | 1 |
| GCOM1   | 171839  | 487 | 11  | 1542548 | 384124 | 0 | 0 | 0 | 0 | 29 | 35  | 12755124 | 1 | 1 |
| GDF1    | NaN     | NaN | NaN | 861520  | 339980 | 0 | 0 | 0 | 0 | 50 | 116 | 39985564 | 1 | 1 |
| GDF7    | 580167  | 278 | 28  | 1058744 | 392668 | 0 | 0 | 1 | 0 | 50 | 63  | 19729164 | 1 | 1 |
| GEFT    | 1329939 | 344 | 52  | 1664656 | 493772 | 0 | 0 | 0 | 0 | 0  | 0   | 493772   | 1 | 1 |
| GEM     | 518471  | 543 | 24  | 761128  | 207548 | 0 | 0 | 0 | 0 | 22 | 20  | 6782512  | 1 | 1 |
| GEMIN6  | 843382  | 297 | 31  | 436100  | 112852 | 0 | 0 | 0 | 0 | 50 | 65  | 20544760 | 1 | 1 |
| GFOD2   | 1157184 | 136 | 50  | 946604  | 298684 | 0 | 0 | 6 | 0 | 0  | 6   | 298684   | 1 | 1 |

|          |         |     |     |         |        |   |   |   |   |    |     |          |   |   |
|----------|---------|-----|-----|---------|--------|---|---|---|---|----|-----|----------|---|---|
| GFRA2    | 333006  | 607 | 7   | 1190464 | 333572 | 0 | 0 | 0 | 0 | 50 | 61  | 20737356 | 1 | 1 |
| GFRA4    | 942842  | 353 | 32  | 752940  | 225348 | 0 | 0 | 0 | 0 | 50 | 61  | 21305176 | 1 | 1 |
| GGPS1    | 513285  | 188 | 22  | 777860  | 199360 | 0 | 0 | 2 | 0 | 29 | 30  | 10398048 | 1 | 1 |
| GHRH     | 787991  | 404 | 44  | 289072  | 75116  | 0 | 0 | 0 | 0 | 50 | 64  | 22911804 | 1 | 1 |
| GINS2    | 390985  | 250 | 38  | 489856  | 125312 | 0 | 0 | 0 | 0 | 50 | 44  | 18864440 | 1 | 1 |
| GIPC2    | 412519  | 265 | -6  | 803848  | 229976 | 0 | 0 | 2 | 0 | 11 | 15  | 5315792  | 1 | 1 |
| GIYD1    | NaN     | NaN | NaN | 1379144 | 440728 | 0 | 0 | 0 | 0 | 50 | 116 | 40086312 | 1 | 1 |
| GIYD2    | 1906000 | 253 | 52  | 1379144 | 440728 | 0 | 0 | 0 | 0 | 8  | 8   | 4018528  | 1 | 1 |
| GJB1     | 728738  | NaN | 25  | 695624  | 218584 | 0 | 0 | 1 | 0 | 50 | 87  | 31895108 | 1 | 1 |
| GJB4     | 548013  | 580 | 19  | 653260  | 202208 | 0 | 0 | 5 | 0 | 0  | 5   | 202208   | 1 | 1 |
| GJB6     | 402703  | 472 | 36  | 663584  | 180136 | 0 | 0 | 0 | 0 | 50 | 45  | 18027128 | 1 | 1 |
| GJC2     | 702358  | 341 | 15  | 1043436 | 370596 | 0 | 0 | 0 | 0 | 4  | 3   | 2210048  | 1 | 1 |
| GLIPR2   | 858124  | 257 | 46  | 416164  | 99680  | 0 | 0 | 0 | 0 | 50 | 67  | 23320136 | 1 | 1 |
| GLRX     | 315156  | 242 | 52  | 274120  | 77252  | 0 | 0 | 0 | 0 | 50 | 58  | 20747324 | 1 | 1 |
| GLRX5    | 209037  | 509 | 35  | 387684  | 122820 | 0 | 0 | 0 | 0 | 50 | 60  | 18652620 | 1 | 1 |
| GLT25D1  | 961640  | 206 | 42  | 1572452 | 472768 | 0 | 0 | 0 | 0 | 21 | 19  | 8583160  | 1 | 1 |
| GLT25D2  | 348183  | 732 | 11  | 1609120 | 446780 | 0 | 0 | 0 | 0 | 7  | 14  | 4443236  | 1 | 1 |
| GLTPD1   | 1744013 | 273 | 28  | 527592  | 169812 | 0 | 0 | 0 | 0 | 9  | 14  | 4108596  | 1 | 1 |
| GLYATL3  | NaN     | NaN | NaN | 735140  | 212176 | 0 | 0 | 0 | 0 | 50 | 116 | 39857760 | 1 | 1 |
| GM2A     | 871795  | 530 | 57  | 608404  | 187256 | 0 | 0 | 1 | 0 | 50 | 74  | 24521636 | 1 | 1 |
| GMFG     | 1748498 | 252 | 32  | 392668  | 91136  | 0 | 0 | 0 | 0 | 50 | 78  | 23410916 | 1 | 1 |
| GNA11    | 1000335 | 173 | 25  | 929516  | 249556 | 0 | 0 | 3 | 0 | 5  | 28  | 5031704  | 1 | 1 |
| GNA14    | 180930  | 608 | -10 | 930584  | 235672 | 0 | 0 | 2 | 0 | 3  | 6   | 895340   | 1 | 1 |
| GNB2     | 1884430 | 247 | 60  | 880744  | 250268 | 0 | 0 | 1 | 0 | 22 | 30  | 9880780  | 1 | 1 |
| GNG10    | 527624  | 264 | 17  | 179780  | 51976  | 0 | 0 | 0 | 0 | 50 | 52  | 19780428 | 1 | 1 |
| GNG13    | 1187310 | 273 | 39  | 184408  | 42008  | 0 | 0 | 0 | 0 | 50 | 70  | 23301268 | 1 | 1 |
| GNG7     | 1472723 | 262 | 33  | 178356  | 51264  | 0 | 0 | 0 | 0 | 50 | 85  | 21265304 | 1 | 1 |
| GNG8     | 1139694 | 347 | 28  | 178356  | 52332  | 0 | 0 | 1 | 0 | 1  | 1   | 145248   | 1 | 1 |
| GNGT1    | 228127  | 480 | -12 | 201852  | 49128  | 0 | 0 | 0 | 0 | 50 | 63  | 21073420 | 1 | 1 |
| GNGT2    | 868792  | 346 | 21  | 189748  | 43076  | 0 | 0 | 0 | 0 | 50 | 55  | 19730588 | 1 | 1 |
| GOLGA2B  | 184712  | 650 | 16  | 376292  | 105376 | 0 | 0 | 0 | 0 | 50 | 57  | 19871208 | 1 | 1 |
| GOLGA6L1 | NaN     | NaN | NaN | 1814532 | 365256 | 0 | 0 | 0 | 0 | 50 | 116 | 40010840 | 1 | 1 |
| GOLGA6L2 | NaN     | NaN | NaN | 2045932 | 394448 | 0 | 0 | 0 | 0 | 50 | 116 | 40040032 | 1 | 1 |

|         |         |     |     |         |         |   |   |   |   |    |     |          |   |   |
|---------|---------|-----|-----|---------|---------|---|---|---|---|----|-----|----------|---|---|
| JOLGA6L | NaN     | NaN | NaN | 2232120 | 615168  | 0 | 0 | 0 | 0 | 7  | 14  | 4303328  | 1 | 1 |
| GOLGA7  | 284397  | 522 | 28  | 379496  | 89356   | 0 | 0 | 1 | 0 | 24 | 26  | 8408364  | 1 | 1 |
| GOLM1   | 320201  | 489 | 20  | 1053404 | 273052  | 0 | 0 | 0 | 0 | 34 | 41  | 17022852 | 1 | 1 |
| GOLT1A  | 557652  | 370 | 34  | 341048  | 102172  | 0 | 0 | 1 | 0 | 9  | 11  | 3453200  | 1 | 1 |
| GOLT1B  | 518837  | 836 | -23 | 363832  | 98612   | 0 | 0 | 0 | 0 | 50 | 62  | 16740900 | 1 | 1 |
| GOSR1   | 488195  | 329 | 28  | 674620  | 170168  | 0 | 0 | 1 | 0 | 50 | 53  | 16914984 | 1 | 1 |
| GOSR2   | 618151  | 366 | 28  | 704524  | 182984  | 0 | 0 | 1 | 0 | 15 | 18  | 6359940  | 1 | 1 |
| GP1BB   | NaN     | NaN | NaN | 467784  | 201852  | 0 | 0 | 0 | 0 | 50 | 116 | 39847436 | 1 | 1 |
| GP5     | 324325  | 269 | 27  | 1330728 | 470988  | 0 | 0 | 6 | 0 | 4  | 10  | 2004280  | 1 | 1 |
| GPER    | 774288  | 346 | 36  | 909224  | 295480  | 0 | 0 | 0 | 0 | 19 | 9   | 5654348  | 1 | 1 |
| GPIHBP1 | 1104860 | 446 | 20  | 469920  | 137772  | 0 | 0 | 0 | 0 | 50 | 69  | 22671148 | 1 | 1 |
| GPR109A | 966471  | 227 | 38  | 905664  | 262728  | 0 | 0 | 0 | 0 | 50 | 53  | 19484948 | 1 | 1 |
| GPR109B | 1004283 | 227 | 40  | 961912  | 281240  | 0 | 0 | 0 | 0 | 50 | 55  | 20718844 | 1 | 1 |
| GPR110  | 203250  | 291 | -5  | 2364552 | 665364  | 0 | 0 | 0 | 0 | 4  | 3   | 2447144  | 1 | 1 |
| GPR111  | 176427  | 691 | 7   | 1627632 | 466716  | 0 | 0 | 0 | 0 | 34 | 40  | 18003276 | 1 | 1 |
| GPR112  | 380446  | NaN | 28  | 7585292 | 2384488 | 0 | 0 | 0 | 0 | 3  | 0   | 3002504  | 1 | 1 |
| GPR113  | 644558  | 346 | 30  | 2877904 | 913496  | 0 | 0 | 0 | 0 | 8  | 9   | 4503756  | 1 | 1 |
| GPR114  | 749405  | 135 | 43  | 1333576 | 408332  | 0 | 0 | 0 | 0 | 37 | 36  | 14548296 | 1 | 1 |
| GPR115  | 176427  | 691 | 7   | 1780356 | 488076  | 0 | 0 | 0 | 0 | 23 | 18  | 12284136 | 1 | 1 |
| GPR116  | 168285  | 392 | 0   | 3466728 | 934500  | 0 | 0 | 0 | 0 | 1  | 0   | 2182992  | 1 | 1 |
| GPR120  | 450249  | 305 | 20  | 917056  | 306872  | 0 | 0 | 0 | 0 | 0  | 0   | 306872   | 1 | 1 |
| GPR123  | 296872  | 499 | -10 | 1372024 | 446780  | 0 | 0 | 0 | 0 | 50 | 55  | 24864820 | 1 | 1 |
| GPR124  | 655980  | 379 | 26  | 3259536 | 1085088 | 0 | 0 | 0 | 0 | 3  | 2   | 1815244  | 1 | 1 |
| GPR125  | 101844  | 818 | 16  | 3349604 | 962980  | 0 | 0 | 0 | 0 | 10 | 3   | 3851564  | 1 | 1 |
| GPR126  | 177409  | 421 | -26 | 3319344 | 844788  | 0 | 0 | 0 | 0 | 0  | 0   | 844788   | 1 | 1 |
| GPR128  | 342000  | 509 | 12  | 2056256 | 564616  | 0 | 0 | 0 | 0 | 6  | 8   | 4229992  | 1 | 1 |
| GPR133  | 218974  | 468 | 0   | 2265228 | 640800  | 0 | 0 | 0 | 0 | 6  | 4   | 2777512  | 1 | 1 |
| GPR139  | 254650  | 827 | -17 | 888576  | 252048  | 0 | 0 | 2 | 0 | 50 | 62  | 19142120 | 1 | 1 |
| GPR143  | 125267  | NaN | 2   | 1018160 | 313636  | 0 | 0 | 0 | 0 | 50 | 64  | 19327952 | 1 | 1 |
| GPR144  | NaN     | NaN | NaN | 2372740 | 796016  | 0 | 0 | 0 | 0 | 7  | 14  | 4484176  | 1 | 1 |
| GPR146  | 765060  | 346 | 34  | 794236  | 278036  | 0 | 0 | 0 | 0 | 48 | 49  | 19862664 | 1 | 1 |
| GPR157  | 890298  | 264 | 31  | 804916  | 286580  | 0 | 0 | 1 | 0 | 50 | 58  | 18535852 | 1 | 1 |
| GPR172A | 2525749 | 200 | 28  | 1042724 | 399076  | 0 | 0 | 0 | 0 | 7  | 8   | 5183360  | 1 | 1 |

|         |         |     |     |          |         |   |   |   |   |    |     |          |   |   |
|---------|---------|-----|-----|----------|---------|---|---|---|---|----|-----|----------|---|---|
| GPR172B | 1399774 | 343 | 26  | 1054116  | 397296  | 0 | 0 | 0 | 0 | 50 | 79  | 21015392 | 1 | 1 |
| GPR21   | NaN     | NaN | NaN | 873624   | 246708  | 0 | 0 | 0 | 0 | 50 | 116 | 39892292 | 1 | 1 |
| GPR26   | 208204  | 808 | 17  | 814884   | 278748  | 0 | 0 | 0 | 0 | 50 | 37  | 21011832 | 1 | 1 |
| GPR27   | 86859   | 605 | 6   | 872200   | 331436  | 0 | 0 | 1 | 0 | 50 | 74  | 20739492 | 1 | 1 |
| GPR3    | 847257  | 188 | 26  | 782132   | 282664  | 0 | 0 | 0 | 0 | 19 | 9   | 4778588  | 1 | 1 |
| GPR34   | 531498  | NaN | 45  | 963692   | 268780  | 0 | 0 | 1 | 0 | 50 | 59  | 24984080 | 1 | 1 |
| GPR44   | 794900  | 522 | 47  | 931296   | 341760  | 0 | 0 | 0 | 0 | 50 | 51  | 21913580 | 1 | 1 |
| GPR56   | 727305  | 168 | 41  | 1766828  | 528304  | 0 | 0 | 0 | 0 | 11 | 12  | 5101836  | 1 | 1 |
| GPR64   | 197855  | NaN | 25  | 2636536  | 739412  | 0 | 0 | 0 | 0 | 0  | 0   | 739412   | 1 | 1 |
| GPR77   | 1132395 | 232 | 41  | 798152   | 289072  | 0 | 0 | 0 | 0 | 0  | 0   | 289072   | 1 | 1 |
| GPR81   | 1042095 | 227 | 42  | 860808   | 250980  | 0 | 0 | 0 | 0 | 50 | 59  | 20574308 | 1 | 1 |
| GPR89C  | NaN     | NaN | NaN | 1673912  | 451408  | 0 | 0 | 0 | 0 | 50 | 116 | 40096992 | 1 | 1 |
| GPR97   | 712945  | 168 | 34  | 1390536  | 419724  | 0 | 0 | 0 | 0 | 42 | 42  | 18149948 | 1 | 1 |
| GPR98   | 115632  | 755 | -2  | 16022492 | 4567480 | 0 | 0 | 0 | 0 | 0  | 0   | 4567480  | 1 | 1 |
| GPX4    | 2398425 | 234 | 17  | 768604   | 200072  | 0 | 0 | 0 | 0 | 50 | 57  | 27012212 | 1 | 1 |
| GRAMD4  | 415189  | 265 | 7   | 1520476  | 409400  | 0 | 0 | 2 | 0 | 16 | 26  | 7371336  | 1 | 1 |
| GRAPL   | NaN     | NaN | NaN | 310788   | 83304   | 0 | 0 | 0 | 0 | 50 | 116 | 39728888 | 1 | 1 |
| GRASP   | 468067  | 234 | 41  | 969032   | 331792  | 0 | 0 | 0 | 0 | 50 | 28  | 16136768 | 1 | 1 |
| GREB1L  | NaN     | NaN | NaN | 4924904  | 1374160 | 0 | 0 | 0 | 0 | 0  | 0   | 1374160  | 1 | 1 |
| GRID2IP | NaN     | NaN | NaN | 3013184  | 959776  | 0 | 0 | 0 | 0 | 5  | 8   | 3331804  | 1 | 1 |
| GRINL1A | 168063  | 487 | 12  | 945892   | 249200  | 0 | 0 | 0 | 0 | 50 | 57  | 22156372 | 1 | 1 |
| GRLF1   | 1201856 | 207 | 29  | 3784636  | 1042724 | 0 | 0 | 0 | 0 | 4  | 3   | 2923472  | 1 | 1 |
| GRP     | 280782  | 512 | 53  | 389108   | 98968   | 0 | 0 | 0 | 0 | 50 | 54  | 16867280 | 1 | 1 |
| GRPR    | 217879  | NaN | 19  | 956216   | 285868  | 0 | 0 | 1 | 0 | 50 | 55  | 20713504 | 1 | 1 |
| GRRP1   | NaN     | NaN | NaN | 641156   | 234604  | 0 | 0 | 0 | 0 | 50 | 116 | 39880188 | 1 | 1 |
| GRXCR2  | 394778  | 568 | -4  | 640444   | 165896  | 0 | 0 | 4 | 0 | 0  | 4   | 165896   | 1 | 1 |
| GSC2    | 487560  | 277 | 18  | 492348   | 175152  | 0 | 0 | 1 | 0 | 50 | 61  | 20002216 | 1 | 1 |
| GSTM4   | 958586  | 201 | 25  | 610540   | 145604  | 0 | 0 | 1 | 0 | 50 | 82  | 20730948 | 1 | 1 |
| GSTT1   | 748735  | 202 | 66  | 609116   | 182272  | 0 | 0 | 0 | 0 | 11 | 9   | 4537220  | 1 | 1 |
| GSTT2   | 699286  | 202 | 63  | 1240304  | 370240  | 0 | 0 | 1 | 0 | 3  | 4   | 1004988  | 1 | 1 |
| GTF2A1L | NaN     | NaN | NaN | 1268784  | 339624  | 0 | 0 | 0 | 0 | 50 | 116 | 39985208 | 1 | 1 |
| GTF2H2  | 370823  | 581 | 25  | 1067644  | 265220  | 0 | 0 | 0 | 0 | 50 | 49  | 25438692 | 1 | 1 |
| GTF2H2C | NaN     | NaN | NaN | 1068356  | 264508  | 0 | 0 | 0 | 0 | 50 | 116 | 39910092 | 1 | 1 |

|         |         |      |     |         |         |   |   |   |   |    |     |          |   |   |
|---------|---------|------|-----|---------|---------|---|---|---|---|----|-----|----------|---|---|
| GTF2H2D | 514523  | 312  | 23  | 1068356 | 264508  | 0 | 0 | 0 | 0 | 39 | 41  | 17165964 | 1 | 1 |
| GTF2H5  | 617881  | 209  | 40  | 191172  | 48060   | 0 | 0 | 0 | 0 | 50 | 61  | 23000448 | 1 | 1 |
| GTF3A   | 304169  | 414  | 59  | 989680  | 245996  | 0 | 0 | 2 | 0 | 44 | 69  | 19976228 | 1 | 1 |
| GTF3C6  | 320358  | 372  | 33  | 576364  | 132788  | 0 | 0 | 0 | 0 | 50 | 43  | 19942052 | 1 | 1 |
| GTPBP5  | 861466  | 288  | -13 | 1005700 | 323960  | 0 | 0 | 0 | 0 | 25 | 32  | 9886476  | 1 | 1 |
| GUCA1A  | 524386  | 273  | 43  | 527592  | 132432  | 0 | 0 | 4 | 0 | 2  | 4   | 399788   | 1 | 1 |
| GUCA2A  | 418399  | 579  | 24  | 297616  | 84728   | 0 | 0 | 0 | 0 | 50 | 41  | 18603492 | 1 | 1 |
| GUCA2B  | 418399  | 579  | 24  | 284800  | 87932   | 0 | 0 | 1 | 0 | 16 | 16  | 6770052  | 1 | 1 |
| GXYLT1  | 172471  | 684  | -9  | 1142760 | 300108  | 0 | 0 | 1 | 0 | 50 | 62  | 29653732 | 1 | 1 |
| GYPE    | 166879  | 959  | -9  | 211464  | 56604   | 0 | 0 | 0 | 0 | 50 | 51  | 21567904 | 1 | 1 |
| H2AFB1  | NaN     | NaN  | NaN | 823428  | 297972  | 0 | 0 | 0 | 0 | 50 | 116 | 39943556 | 1 | 1 |
| H2AFB2  | NaN     | NaN  | NaN | 548952  | 198648  | 0 | 0 | 0 | 0 | 50 | 116 | 39844232 | 1 | 1 |
| H2AFB3  | 494257  | NaN  | -7  | 823428  | 297972  | 0 | 0 | 0 | 0 | 43 | 47  | 19241800 | 1 | 1 |
| H2AFY2  | 484729  | 425  | 25  | 955504  | 273764  | 0 | 0 | 1 | 0 | 50 | 56  | 21866944 | 1 | 1 |
| H2BFM   | NaN     | NaN  | NaN | 390888  | 116412  | 0 | 0 | 0 | 0 | 50 | 116 | 39761996 | 1 | 1 |
| HAGHL   | 1207790 | 194  | 33  | 883592  | 257032  | 0 | 0 | 1 | 0 | 50 | 77  | 22508812 | 1 | 1 |
| HAND2   | 251136  | 719  | -10 | 541832  | 160912  | 0 | 0 | 0 | 0 | 50 | 65  | 26127552 | 1 | 1 |
| HBA1    | 1267639 | 220  | 36  | 354220  | 114632  | 0 | 0 | 1 | 0 | 31 | 44  | 9790000  | 1 | 1 |
| HBA2    | 1267639 | 220  | 36  | 354220  | 114632  | 0 | 0 | 0 | 0 | 50 | 56  | 16678244 | 1 | 1 |
| HBG2    | 109545  | 1056 | -1  | 378072  | 108936  | 0 | 0 | 0 | 0 | 50 | 50  | 17996156 | 1 | 1 |
| HBM     | 1267639 | 220  | 36  | 357068  | 110716  | 0 | 0 | 0 | 0 | 50 | 56  | 16678244 | 1 | 1 |
| HBQ1    | 1267639 | 220  | 36  | 348524  | 120328  | 0 | 0 | 0 | 0 | 50 | 56  | 16678244 | 1 | 1 |
| HBXIP   | 403650  | 479  | 31  | 438948  | 133500  | 0 | 0 | 0 | 0 | 50 | 40  | 19131440 | 1 | 1 |
| HBZ     | 1267639 | 220  | 36  | 355288  | 113564  | 0 | 0 | 1 | 0 | 31 | 44  | 9790000  | 1 | 1 |
| HCP5    | NaN     | NaN  | NaN | 114632  | 29548   | 0 | 0 | 0 | 0 | 50 | 116 | 39675132 | 1 | 1 |
| HCRT    | 2129732 | 206  | 30  | 308652  | 122820  | 0 | 0 | 0 | 0 | 50 | 83  | 22131452 | 1 | 1 |
| HDAC3   | 771583  | 353  | 25  | 1149880 | 286580  | 0 | 0 | 2 | 0 | 7  | 9   | 3981148  | 1 | 1 |
| HDHD1A  | 55330   | NaN  | 19  | 742260  | 211464  | 0 | 0 | 0 | 0 | 9  | 7   | 3781788  | 1 | 1 |
| HDHD2   | 119441  | 561  | -11 | 669992  | 188680  | 0 | 0 | 0 | 0 | 50 | 64  | 21463952 | 1 | 1 |
| HEATR2  | 545367  | 390  | 14  | 2091500 | 706660  | 0 | 0 | 0 | 0 | 5  | 5   | 2186908  | 1 | 1 |
| HEATR7A | 2550138 | 210  | 26  | 4248504 | 1330728 | 0 | 0 | 0 | 0 | 0  | 0   | 1330728  | 1 | 1 |
| HEATR7B | 211261  | 644  | -5  | 4171608 | 1087224 | 0 | 0 | 0 | 0 | 1  | 0   | 1391248  | 1 | 1 |
| HEBP2   | 421773  | 590  | 19  | 535424  | 137416  | 0 | 0 | 0 | 0 | 50 | 54  | 21692148 | 1 | 1 |

|          |         |     |     |         |        |   |   |   |   |    |     |          |   |   |
|----------|---------|-----|-----|---------|--------|---|---|---|---|----|-----|----------|---|---|
| HEMGN    | 467637  | 269 | 40  | 1256324 | 314704 | 0 | 0 | 1 | 0 | 50 | 47  | 18389892 | 1 | 1 |
| HEMK1    | 583785  | 302 | 50  | 873624  | 253116 | 0 | 0 | 0 | 0 | 50 | 43  | 17510216 | 1 | 1 |
| HES2     | 643751  | 198 | 22  | 420080  | 152368 | 0 | 0 | 0 | 0 | 50 | 68  | 23732028 | 1 | 1 |
| HES5     | 339388  | 228 | 38  | 419724  | 126024 | 0 | 0 | 0 | 0 | 50 | 44  | 17226128 | 1 | 1 |
| HES6     | 349323  | 252 | 28  | 545392  | 188324 | 0 | 0 | 1 | 0 | 3  | 13  | 2886804  | 1 | 1 |
| HES7     | 1381225 | 202 | 37  | 559276  | 195800 | 0 | 0 | 0 | 0 | 50 | 76  | 28183808 | 1 | 1 |
| HESX1    | 454806  | 389 | 37  | 486296  | 122464 | 0 | 0 | 0 | 0 | 50 | 59  | 21368544 | 1 | 1 |
| HFE2     | NaN     | NaN | NaN | 1030264 | 350660 | 0 | 0 | 3 | 0 | 26 | 43  | 11927780 | 1 | 1 |
| HGC6.3   | NaN     | NaN | NaN | 405840  | 145248 | 0 | 0 | 0 | 0 | 50 | 116 | 39790832 | 1 | 1 |
| HHAT     | 87459   | 754 | 1   | 1345680 | 386616 | 0 | 0 | 2 | 0 | 18 | 13  | 6480268  | 1 | 1 |
| HHEX     | 359162  | 317 | 17  | 680672  | 202564 | 0 | 0 | 0 | 0 | 50 | 56  | 24663324 | 1 | 1 |
| HHLA1    | NaN     | NaN | NaN | 1390180 | 378428 | 0 | 0 | 0 | 0 | 50 | 116 | 40024012 | 1 | 1 |
| HHLA3    | 296134  | 396 | 5   | 421148  | 81880  | 0 | 0 | 0 | 0 | 50 | 56  | 20386340 | 1 | 1 |
| HIBADH   | 427440  | 372 | 10  | 859740  | 249912 | 0 | 0 | 1 | 0 | 50 | 74  | 28610652 | 1 | 1 |
| HIBCH    | 499049  | 471 | 24  | 1039164 | 256320 | 0 | 0 | 0 | 0 | 25 | 22  | 9983308  | 1 | 1 |
| HIC1     | 1415256 | 294 | 27  | 1754368 | 601640 | 0 | 0 | 0 | 0 | 10 | 8   | 3417244  | 1 | 1 |
| HIGD1A   | 369545  | 396 | 31  | 288360  | 74760  | 0 | 0 | 0 | 0 | 50 | 43  | 19115064 | 1 | 1 |
| HIGD1B   | 1101543 | 172 | 28  | 259880  | 73336  | 0 | 0 | 0 | 0 | 50 | 74  | 17295192 | 1 | 1 |
| HINT1    | 310375  | 228 | 15  | 323960  | 91492  | 0 | 0 | 0 | 0 | 50 | 52  | 18023212 | 1 | 1 |
| HINT3    | 150315  | 177 | 15  | 475616  | 127804 | 0 | 0 | 0 | 0 | 50 | 45  | 16944888 | 1 | 1 |
| HIST1H2A | 272695  | 635 | 29  | 320044  | 107156 | 0 | 0 | 0 | 0 | 50 | 55  | 17264220 | 1 | 1 |
| HIST1H3J | 228884  | 634 | 40  | 330724  | 110360 | 0 | 0 | 0 | 0 | 50 | 48  | 14804260 | 1 | 1 |
| HIST1H4B | 408919  | 685 | 43  | 248488  | 86864  | 0 | 0 | 0 | 0 | 50 | 57  | 16881520 | 1 | 1 |
| HIST1H4G | 390169  | 544 | 57  | 240656  | 78676  | 0 | 0 | 1 | 0 | 36 | 34  | 7770412  | 1 | 1 |
| IST2H2AA | NaN     | NaN | NaN | 632256  | 215736 | 0 | 0 | 0 | 0 | 50 | 116 | 39861320 | 1 | 1 |
| IST2H2AA | NaN     | NaN | NaN | 632256  | 215736 | 0 | 0 | 0 | 0 | 50 | 116 | 39861320 | 1 | 1 |
| HIST2H3A | NaN     | NaN | NaN | 660024  | 226416 | 0 | 0 | 0 | 0 | 50 | 116 | 39872000 | 1 | 1 |
| HIST2H3C | NaN     | NaN | NaN | 660024  | 226416 | 0 | 0 | 0 | 0 | 50 | 116 | 39872000 | 1 | 1 |
| HIST2H4A | NaN     | NaN | NaN | 502672  | 172304 | 0 | 0 | 0 | 0 | 50 | 116 | 39817888 | 1 | 1 |
| HIST2H4B | NaN     | NaN | NaN | 502672  | 172304 | 0 | 0 | 0 | 0 | 50 | 116 | 39817888 | 1 | 1 |
| HIST3H3  | 626588  | 351 | 7   | 330012  | 111072 | 0 | 0 | 0 | 0 | 50 | 72  | 28650524 | 1 | 1 |
| HLA-DMA  | 1276842 | 431 | 40  | 669280  | 189392 | 0 | 0 | 0 | 0 | 6  | 11  | 2998944  | 1 | 1 |
| HMGB3    | 226983  | NaN | -8  | 539340  | 121752 | 0 | 0 | 0 | 0 | 50 | 68  | 26849520 | 1 | 1 |

|         |         |     |     |         |        |   |   |   |   |    |     |          |   |   |
|---------|---------|-----|-----|---------|--------|---|---|---|---|----|-----|----------|---|---|
| HMGCL   | 903441  | 254 | 32  | 831616  | 249200 | 0 | 0 | 1 | 0 | 50 | 57  | 18158136 | 1 | 1 |
| HMGN2   | 1003175 | 167 | 31  | 251692  | 61232  | 0 | 0 | 1 | 0 | 2  | 7   | 1400504  | 1 | 1 |
| HMGN3   | 233858  | 624 | 0   | 276968  | 64792  | 0 | 0 | 0 | 0 | 50 | 60  | 19892568 | 1 | 1 |
| HMGN4   | 426020  | 498 | 34  | 228908  | 66928  | 0 | 0 | 0 | 0 | 50 | 36  | 18178784 | 1 | 1 |
| HMGN5   | 141842  | NaN | -22 | 767180  | 160912 | 0 | 0 | 0 | 0 | 50 | 73  | 22104752 | 1 | 1 |
| HMGXB3  | NaN     | NaN | NaN | 3253484 | 970456 | 0 | 0 | 0 | 0 | 0  | 0   | 970456   | 1 | 1 |
| HMHB1   | 142005  | 404 | 33  | 111072  | 27768  | 0 | 0 | 1 | 0 | 0  | 1   | 27768    | 1 | 1 |
| HMX3    | 237830  | 708 | 23  | 856180  | 294056 | 0 | 0 | 2 | 0 | 3  | 5   | 1280888  | 1 | 1 |
| HN1     | 1511891 | 168 | 25  | 521896  | 98612  | 0 | 0 | 0 | 0 | 50 | 53  | 18659384 | 1 | 1 |
| NRNPA1L | 324687  | 462 | 32  | 808120  | 224636 | 0 | 0 | 0 | 0 | 50 | 50  | 19140696 | 1 | 1 |
| HNRPDL  | 684394  | 387 | 46  | 1080104 | 298684 | 0 | 0 | 0 | 0 | 50 | 53  | 22010768 | 1 | 1 |
| HNRPLL  | 859042  | 294 | 24  | 1420084 | 384836 | 0 | 0 | 0 | 0 | 7  | 8   | 3191184  | 1 | 1 |
| HOMER2  | 457445  | 683 | 24  | 934500  | 237096 | 0 | 0 | 2 | 0 | 1  | 6   | 825564   | 1 | 1 |
| HOPX    | 597691  | 572 | 16  | 356356  | 94340  | 0 | 0 | 0 | 0 | 50 | 70  | 20269572 | 1 | 1 |
| HORMAD2 | 655208  | 178 | 30  | 834108  | 195444 | 0 | 0 | 0 | 0 | 7  | 6   | 2529380  | 1 | 1 |
| HOXB13  | 727820  | 415 | 24  | 695980  | 221432 | 0 | 0 | 2 | 0 | 4  | 6   | 2224644  | 1 | 1 |
| HOXB5   | 946208  | 524 | 29  | 672484  | 199004 | 0 | 0 | 0 | 0 | 50 | 60  | 17564684 | 1 | 1 |
| HOXB7   | 946208  | 524 | 29  | 546104  | 157708 | 0 | 0 | 0 | 0 | 50 | 60  | 17564684 | 1 | 1 |
| HP      | 438866  | 372 | 19  | 1052692 | 279104 | 0 | 0 | 2 | 0 | 4  | 8   | 2763272  | 1 | 1 |
| HPDL    | 1010538 | 355 | 28  | 876116  | 315772 | 0 | 0 | 0 | 0 | 28 | 31  | 10911044 | 1 | 1 |
| HPS6    | 1018634 | 187 | 38  | 1802428 | 686012 | 0 | 0 | 3 | 0 | 48 | 50  | 19195164 | 1 | 1 |
| HRASLS2 | 854193  | 303 | 56  | 406196  | 131008 | 0 | 0 | 2 | 0 | 8  | 9   | 1189396  | 1 | 1 |
| HRK     | NaN     | NaN | NaN | 216448  | 82592  | 0 | 0 | 0 | 0 | 50 | 116 | 39728176 | 1 | 1 |
| HRNBP3  | NaN     | NaN | NaN | 811680  | 238164 | 0 | 0 | 0 | 0 | 50 | 116 | 39883748 | 1 | 1 |
| HS3ST6  | 1766472 | 214 | 39  | 742616  | 261304 | 0 | 0 | 0 | 0 | 31 | 55  | 16867280 | 1 | 1 |
| HSBP1L1 | NaN     | NaN | NaN | 202920  | 50196  | 0 | 0 | 0 | 0 | 50 | 116 | 39695780 | 1 | 1 |
| HSD11B1 | 219540  | 222 | 15  | 762196  | 204344 | 0 | 0 | 0 | 0 | 50 | 49  | 17060944 | 1 | 1 |
| HSD3B7  | 1453326 | 247 | 43  | 927380  | 283732 | 0 | 0 | 1 | 0 | 50 | 71  | 24760156 | 1 | 1 |
| HSF2BP  | 878395  | 518 | 73  | 869708  | 233536 | 0 | 0 | 1 | 0 | 50 | 58  | 21958080 | 1 | 1 |
| HSFX1   | NaN     | NaN | NaN | 2100400 | 633680 | 0 | 0 | 0 | 0 | 7  | 14  | 4321840  | 1 | 1 |
| HSFX2   | NaN     | NaN | NaN | 2100400 | 633680 | 0 | 0 | 0 | 0 | 7  | 14  | 4321840  | 1 | 1 |
| HSFY1   | NaN     | NaN | NaN | 2199368 | 609472 | 0 | 0 | 0 | 0 | 7  | 14  | 4297632  | 1 | 1 |
| HSFY2   | NaN     | NaN | NaN | 2199368 | 609472 | 0 | 0 | 0 | 0 | 7  | 14  | 4297632  | 1 | 1 |



|         |         |     |     |         |        |   |   |   |   |    |     |          |   |   |
|---------|---------|-----|-----|---------|--------|---|---|---|---|----|-----|----------|---|---|
| HSPB6   | 1151198 | 321 | 30  | 387684  | 138840 | 0 | 0 | 0 | 0 | 50 | 47  | 19100468 | 1 | 1 |
| HSPC159 | 336405  | 452 | 17  | 448560  | 122820 | 0 | 0 | 0 | 0 | 50 | 53  | 21582856 | 1 | 1 |
| HSPE1   | 681973  | 428 | 29  | 265220  | 77608  | 0 | 0 | 1 | 0 | 1  | 2   | 253116   | 1 | 1 |
| HTN3    | 34716   | 965 | -1  | 157708  | 30260  | 0 | 0 | 0 | 0 | 50 | 89  | 21005780 | 1 | 1 |
| HTRA1   | 252955  | 279 | 5   | 1198652 | 376648 | 0 | 0 | 0 | 0 | 50 | 51  | 21633052 | 1 | 1 |
| HTRA4   | 421614  | 428 | 42  | 1187972 | 374512 | 0 | 0 | 0 | 0 | 50 | 56  | 22426932 | 1 | 1 |
| HYAL1   | 843769  | 206 | 51  | 1079392 | 330368 | 0 | 0 | 0 | 0 | 50 | 68  | 20472848 | 1 | 1 |
| HYAL3   | 843769  | 206 | 51  | 1026704 | 325384 | 0 | 0 | 2 | 0 | 50 | 68  | 20472848 | 1 | 1 |
| HYLS1   | NaN     | NaN | NaN | 748312  | 217160 | 0 | 0 | 1 | 0 | 50 | 117 | 39862744 | 1 | 1 |
| IAH1    | 691902  | 278 | 38  | 641868  | 179424 | 0 | 0 | 1 | 0 | 39 | 61  | 17489568 | 1 | 1 |
| ICOSLG  | 1128093 | 219 | 76  | 781420  | 215024 | 0 | 0 | 0 | 0 | 50 | 45  | 20503464 | 1 | 1 |
| ID4     | 111172  | 864 | -23 | 390176  | 137416 | 0 | 0 | 0 | 0 | 50 | 84  | 22456836 | 1 | 1 |
| IER3    | 2199534 | 167 | 44  | 374512  | 134924 | 0 | 0 | 0 | 0 | 50 | 60  | 20858752 | 1 | 1 |
| IER3IP1 | 148377  | 504 | 8   | 212888  | 63724  | 0 | 0 | 1 | 0 | 0  | 1   | 63724    | 1 | 1 |
| IER5L   | 1452033 | 257 | 39  | 964760  | 332860 | 0 | 0 | 0 | 0 | 50 | 72  | 22966272 | 1 | 1 |
| IFFO1   | 2764720 | 179 | 42  | 1422576 | 425064 | 0 | 0 | 1 | 0 | 33 | 46  | 14927436 | 1 | 1 |
| IFFO2   | NaN     | NaN | NaN | 1318624 | 375224 | 0 | 0 | 0 | 0 | 50 | 116 | 40020808 | 1 | 1 |
| IFI27   | 200295  | 605 | 47  | 299752  | 101816 | 0 | 0 | 0 | 0 | 50 | 57  | 19244648 | 1 | 1 |
| IFI27L1 | 200295  | 605 | 47  | 269492  | 88288  | 0 | 0 | 0 | 0 | 50 | 57  | 19244648 | 1 | 1 |
| IFI6    | 732210  | 217 | 24  | 360984  | 101460 | 0 | 0 | 1 | 0 | 2  | 3   | 627984   | 1 | 1 |
| IFITM1  | 1454043 | 344 | 48  | 313636  | 94340  | 0 | 0 | 0 | 0 | 50 | 96  | 29119376 | 1 | 1 |
| IFITM2  | 1454043 | 344 | 48  | 334640  | 97900  | 0 | 0 | 0 | 0 | 50 | 96  | 29119376 | 1 | 1 |
| IFITM3  | 1454043 | 344 | 48  | 333928  | 101816 | 0 | 0 | 0 | 0 | 50 | 96  | 29119376 | 1 | 1 |
| IFLTD1  | 200328  | 517 | 1   | 1150592 | 297616 | 0 | 0 | 0 | 0 | 45 | 51  | 19665796 | 1 | 1 |
| IFNA10  | 193208  | 498 | -3  | 478108  | 132788 | 0 | 0 | 0 | 0 | 50 | 58  | 18347172 | 1 | 1 |
| IFNA13  | 232155  | 466 | -14 | 485228  | 131008 | 0 | 0 | 1 | 0 | 24 | 24  | 6810636  | 1 | 1 |
| IFNA6   | 232155  | 466 | -14 | 478108  | 128516 | 0 | 0 | 1 | 0 | 24 | 24  | 6810636  | 1 | 1 |
| IFNA7   | 193208  | 498 | -3  | 481668  | 129228 | 0 | 0 | 4 | 0 | 4  | 6   | 646852   | 1 | 1 |
| IFNAR1  | 857199  | 179 | 81  | 1467076 | 363476 | 0 | 0 | 1 | 0 | 50 | 47  | 20588548 | 1 | 1 |
| IFT27   | 1235005 | 537 | 19  | 493416  | 131364 | 0 | 0 | 0 | 0 | 50 | 67  | 19039236 | 1 | 1 |
| IFT46   | 1359480 | 167 | 47  | 954792  | 232824 | 0 | 0 | 0 | 0 | 50 | 64  | 22940284 | 1 | 1 |
| IGFALS  | 1604603 | 288 | 36  | 1522968 | 546816 | 0 | 0 | 1 | 0 | 27 | 29  | 13226112 | 1 | 1 |
| IGFBP2  | 582017  | 536 | 19  | 793880  | 263440 | 0 | 0 | 0 | 0 | 32 | 42  | 12298376 | 1 | 1 |

|         |         |     |     |         |        |   |   |   |   |    |     |          |   |   |
|---------|---------|-----|-----|---------|--------|---|---|---|---|----|-----|----------|---|---|
| IGFBP5  | 573046  | 620 | 16  | 690640  | 196868 | 0 | 0 | 1 | 0 | 50 | 71  | 20876552 | 1 | 1 |
| IGFL2   | 1177162 | 249 | 28  | 364188  | 92916  | 0 | 0 | 0 | 0 | 50 | 46  | 17997580 | 1 | 1 |
| IGLL1   | 604420  | 399 | 31  | 538628  | 155572 | 0 | 0 | 0 | 0 | 50 | 47  | 18688220 | 1 | 1 |
| IGSF6   | NaN     | NaN | NaN | 624424  | 174440 | 0 | 0 | 0 | 0 | 50 | 116 | 39820024 | 1 | 1 |
| IL11    | 1028808 | 209 | 19  | 467428  | 190460 | 0 | 0 | 0 | 0 | 2  | 0   | 629052   | 1 | 1 |
| IL13    | 717582  | 349 | 30  | 375224  | 110716 | 0 | 0 | 2 | 0 | 1  | 2   | 316484   | 1 | 1 |
| IL13RA2 | 166070  | NaN | 19  | 1014600 | 244572 | 0 | 0 | 1 | 0 | 50 | 44  | 15622704 | 1 | 1 |
| IL15RA  | 650283  | 305 | 32  | 669992  | 214312 | 0 | 0 | 1 | 0 | 29 | 31  | 15717756 | 1 | 1 |
| IL17D   | 385825  | 434 | 29  | 485940  | 173016 | 0 | 0 | 1 | 0 | 6  | 8   | 2391608  | 1 | 1 |
| IL18    | 389593  | 362 | 2   | 527592  | 115344 | 0 | 0 | 0 | 0 | 50 | 48  | 17867640 | 1 | 1 |
| IL1F5   | 672307  | 479 | 25  | 401212  | 115700 | 0 | 0 | 0 | 0 | 50 | 59  | 20875128 | 1 | 1 |
| IL1F6   | 611416  | 469 | 33  | 411536  | 108580 | 0 | 0 | 0 | 0 | 50 | 62  | 26386364 | 1 | 1 |
| IL1F7   | 590466  | 420 | 46  | 640088  | 156640 | 0 | 0 | 0 | 0 | 50 | 70  | 24279556 | 1 | 1 |
| IL1F8   | 641862  | 469 | 29  | 626916  | 152724 | 0 | 0 | 0 | 0 | 50 | 60  | 22667588 | 1 | 1 |
| IL1F9   | 611416  | 469 | 33  | 442864  | 118904 | 0 | 0 | 0 | 0 | 50 | 62  | 26386364 | 1 | 1 |
| IL2     | 227942  | 612 | -14 | 402636  | 105732 | 0 | 0 | 0 | 0 | 50 | 46  | 18207264 | 1 | 1 |
| IL22    | 383435  | 623 | 12  | 468852  | 127092 | 0 | 0 | 0 | 0 | 50 | 61  | 20003996 | 1 | 1 |
| IL25    | 1220624 | 456 | 31  | 455324  | 131008 | 0 | 0 | 0 | 0 | 50 | 78  | 24903980 | 1 | 1 |
| IL28A   | 1838894 | 286 | 29  | 508724  | 160912 | 0 | 0 | 0 | 0 | 50 | 70  | 23062392 | 1 | 1 |
| IL28B   | 1838894 | 286 | 29  | 487720  | 161624 | 0 | 0 | 0 | 0 | 50 | 70  | 23062392 | 1 | 1 |
| IL28RA  | 840519  | 235 | 31  | 1321828 | 375224 | 0 | 0 | 0 | 0 | 50 | 73  | 22939928 | 1 | 1 |
| IL29    | 1838894 | 286 | 29  | 498400  | 164828 | 0 | 0 | 0 | 0 | 50 | 70  | 23062392 | 1 | 1 |
| IL3     | 365169  | 484 | 35  | 398364  | 111072 | 0 | 0 | 0 | 0 | 50 | 43  | 18137132 | 1 | 1 |
| IL4     | 717412  | 356 | 59  | 399432  | 108936 | 0 | 0 | 0 | 0 | 50 | 46  | 17209040 | 1 | 1 |
| IL8     | 273344  | 444 | 13  | 265932  | 69420  | 0 | 0 | 0 | 0 | 50 | 46  | 18441512 | 1 | 1 |
| IL9     | 489402  | 443 | 19  | 383768  | 100036 | 0 | 0 | 0 | 0 | 50 | 52  | 16320820 | 1 | 1 |
| ILKAP   | 388991  | 248 | 29  | 1029908 | 276256 | 0 | 0 | 1 | 0 | 1  | 1   | 564616   | 1 | 1 |
| IMMP2L  | 67842   | 871 | -7  | 459952  | 125312 | 0 | 0 | 0 | 0 | 50 | 84  | 28978400 | 1 | 1 |
| IMP5    | 369065  | 563 | 15  | 1650772 | 546104 | 0 | 0 | 0 | 0 | 9  | 6   | 3472780  | 1 | 1 |
| IMPDH1  | 902782  | 246 | 34  | 1547176 | 460664 | 0 | 0 | 3 | 0 | 48 | 66  | 19144256 | 1 | 1 |
| INO80C  | 368170  | 474 | 38  | 590248  | 169100 | 0 | 0 | 1 | 0 | 26 | 24  | 9180528  | 1 | 1 |
| INPP5J  | 731144  | 218 | 40  | 1624428 | 476328 | 0 | 0 | 0 | 0 | 11 | 11  | 6390912  | 1 | 1 |
| INPP5K  | 1371893 | 220 | 24  | 1169460 | 316128 | 0 | 0 | 1 | 0 | 50 | 74  | 22937080 | 1 | 1 |

|          |         |     |     |         |         |   |   |   |   |    |     |          |   |   |
|----------|---------|-----|-----|---------|---------|---|---|---|---|----|-----|----------|---|---|
| INS      | NaN     | NaN | NaN | 276968  | 89356   | 0 | 0 | 0 | 0 | 50 | 116 | 39734940 | 1 | 1 |
| INS-IGF2 | 837088  | 579 | 38  | 494840  | 166252  | 0 | 0 | 0 | 0 | 50 | 46  | 19328664 | 1 | 1 |
| IQCF3    | 849777  | 453 | 39  | 404060  | 107512  | 0 | 0 | 0 | 0 | 50 | 44  | 18199076 | 1 | 1 |
| IQCF5    | NaN     | NaN | NaN | 384836  | 101104  | 0 | 0 | 0 | 0 | 50 | 116 | 39746688 | 1 | 1 |
| IQCF6    | NaN     | NaN | NaN | 271272  | 79032   | 0 | 0 | 0 | 0 | 50 | 116 | 39724616 | 1 | 1 |
| IQCJ     | 170382  | 930 | -11 | 456036  | 122820  | 0 | 0 | 1 | 0 | 20 | 23  | 6898212  | 1 | 1 |
| IRGM     | NaN     | NaN | NaN | 451408  | 129584  | 0 | 0 | 0 | 0 | 50 | 116 | 39775168 | 1 | 1 |
| ISCA1    | 311398  | 417 | 8   | 334284  | 95052   | 0 | 0 | 0 | 0 | 50 | 58  | 21260676 | 1 | 1 |
| ISCA1P1  | 177047  | 815 | -3  | 332148  | 100392  | 0 | 0 | 0 | 0 | 50 | 45  | 16884012 | 1 | 1 |
| ISCU     | 437636  | 399 | 40  | 380208  | 99324   | 0 | 0 | 0 | 0 | 50 | 64  | 24423380 | 1 | 1 |
| ISG15    | 1971475 | 239 | 15  | 405128  | 133144  | 0 | 0 | 2 | 0 | 0  | 2   | 133144   | 1 | 1 |
| ISL2     | 289294  | 229 | 39  | 912072  | 264864  | 0 | 0 | 1 | 0 | 50 | 56  | 17124668 | 1 | 1 |
| ITGB1BP3 | 2173603 | 207 | 30  | 603420  | 162336  | 0 | 0 | 0 | 0 | 50 | 75  | 21194460 | 1 | 1 |
| ITIH5L   | 257678  | NaN | 19  | 3219664 | 1043792 | 0 | 0 | 0 | 0 | 0  | 0   | 1043792  | 1 | 1 |
| JHDM1D   | 462584  | 624 | 29  | 2471708 | 629764  | 0 | 0 | 0 | 0 | 10 | 19  | 8477784  | 1 | 1 |
| JMJD5    | 227767  | 448 | 27  | 1158780 | 328944  | 0 | 0 | 0 | 0 | 27 | 27  | 10397336 | 1 | 1 |
| JMJD8    | 1207790 | 194 | 33  | 726240  | 228552  | 0 | 0 | 0 | 0 | 17 | 19  | 6751184  | 1 | 1 |
| JOSD1    | 1056349 | 262 | 45  | 525812  | 137416  | 0 | 0 | 1 | 0 | 50 | 70  | 24305544 | 1 | 1 |
| JUB      | 1240941 | 185 | 38  | 1335356 | 421504  | 0 | 0 | 0 | 0 | 9  | 7   | 3338924  | 1 | 1 |
| KAZ      | 163077  | 802 | 9   | 2169108 | 646140  | 0 | 0 | 0 | 0 | 3  | 0   | 1858676  | 1 | 1 |
| KBTBD10  | 370890  | 418 | 22  | 1543616 | 424708  | 0 | 0 | 0 | 0 | 50 | 53  | 25210496 | 1 | 1 |
| KBTBD12  | 727461  | 390 | 49  | 1602356 | 416164  | 0 | 0 | 0 | 0 | 50 | 64  | 20779008 | 1 | 1 |
| KBTBD13  | 688371  | 189 | 44  | 1085088 | 385548  | 0 | 0 | 1 | 0 | 50 | 72  | 23489592 | 1 | 1 |
| KBTBD5   | 369022  | 329 | 34  | 1548956 | 467428  | 0 | 0 | 0 | 0 | 32 | 25  | 14158120 | 1 | 1 |
| KBTBD8   | 99545   | 940 | 13  | 1544684 | 399076  | 0 | 0 | 1 | 0 | 50 | 75  | 23167768 | 1 | 1 |
| KCNE1L   | 203975  | NaN | 36  | 340692  | 117480  | 0 | 0 | 0 | 0 | 50 | 52  | 15315832 | 1 | 1 |
| KCNE4    | 279069  | 585 | 3   | 424352  | 127804  | 0 | 0 | 2 | 0 | 2  | 3   | 623712   | 1 | 1 |
| KCNK12   | 791803  | 516 | 25  | 1021364 | 363832  | 0 | 0 | 0 | 0 | 50 | 76  | 24983724 | 1 | 1 |
| KCNK17   | 190767  | 749 | 31  | 941264  | 285868  | 0 | 0 | 0 | 0 | 50 | 54  | 20647288 | 1 | 1 |
| KCP      | NaN     | NaN | NaN | 4184780 | 1203280 | 0 | 0 | 0 | 0 | 0  | 0   | 1203280  | 1 | 1 |
| KCTD12   | 202176  | 734 | 11  | 778572  | 265932  | 0 | 0 | 1 | 0 | 50 | 59  | 19546892 | 1 | 1 |
| KDELR1   | 1478750 | 217 | 36  | 545748  | 153792  | 0 | 0 | 1 | 0 | 50 | 89  | 31278516 | 1 | 1 |
| KDM4DL   | NaN     | NaN | NaN | 1261664 | 362764  | 0 | 0 | 0 | 0 | 50 | 116 | 40008348 | 1 | 1 |

|          |         |      |     |         |         |   |   |   |   |    |     |          |   |   |
|----------|---------|------|-----|---------|---------|---|---|---|---|----|-----|----------|---|---|
| KHK      | 1214097 | 238  | 50  | 933076  | 268424  | 0 | 0 | 1 | 0 | 50 | 60  | 22743060 | 1 | 1 |
| KIAA0040 | NaN     | NaN  | NaN | 255252  | 65148   | 0 | 0 | 0 | 0 | 50 | 116 | 39710732 | 1 | 1 |
| KIAA0090 | 788190  | 448  | 30  | 2541128 | 741904  | 0 | 0 | 0 | 0 | 0  | 0   | 741904   | 1 | 1 |
| KIAA0146 | 918018  | 606  | 6   | 2346040 | 672128  | 0 | 0 | 0 | 0 | 8  | 1   | 1829128  | 1 | 1 |
| KIAA0174 | 471197  | 218  | 31  | 925244  | 269848  | 0 | 0 | 0 | 0 | 44 | 48  | 15751932 | 1 | 1 |
| KIAA0182 | 422186  | 213  | 37  | 3027068 | 941620  | 0 | 0 | 0 | 0 | 2  | 3   | 1948388  | 1 | 1 |
| KIAA0240 | 1023102 | 187  | 38  | 2722332 | 784980  | 0 | 0 | 0 | 0 | 3  | 4   | 1850844  | 1 | 1 |
| KIAA0247 | 600813  | 299  | 44  | 758636  | 236740  | 0 | 0 | 0 | 0 | 35 | 28  | 16633032 | 1 | 1 |
| KIAA0284 | 855494  | 247  | 41  | 3822728 | 1236388 | 0 | 0 | 0 | 0 | 0  | 0   | 1236388  | 1 | 1 |
| KIAA0317 | 900799  | 207  | 42  | 2134932 | 582060  | 0 | 0 | 0 | 0 | 0  | 0   | 582060   | 1 | 1 |
| KIAA0406 | 599934  | 303  | 49  | 2720908 | 801356  | 0 | 0 | 0 | 0 | 3  | 0   | 1348172  | 1 | 1 |
| KIAA0415 | 479282  | 523  | 22  | 2002144 | 657176  | 0 | 0 | 0 | 0 | 6  | 2   | 2037744  | 1 | 1 |
| KIAA0427 | 99954   | 406  | 51  | 1543616 | 428980  | 0 | 0 | 0 | 0 | 5  | 4   | 3007132  | 1 | 1 |
| KIAA0467 | 1066191 | 239  | 31  | 6379876 | 1974020 | 0 | 0 | 0 | 0 | 1  | 0   | 2525820  | 1 | 1 |
| KIAA0494 | 615653  | 417  | 20  | 1290500 | 341404  | 0 | 0 | 0 | 0 | 12 | 10  | 4601656  | 1 | 1 |
| KIAA0495 | 249153  | 341  | 24  | 487720  | 163760  | 0 | 0 | 0 | 0 | 50 | 59  | 21371392 | 1 | 1 |
| KIAA0528 | 213736  | 811  | -9  | 2608412 | 701320  | 0 | 0 | 0 | 0 | 6  | 3   | 2743692  | 1 | 1 |
| KIAA0562 | 249714  | 412  | 32  | 2414036 | 642580  | 0 | 0 | 0 | 0 | 2  | 1   | 1001072  | 1 | 1 |
| KIAA0564 | 259442  | 557  | 50  | 4938788 | 1360276 | 0 | 0 | 0 | 0 | 0  | 0   | 1360276  | 1 | 1 |
| KIAA0649 | 298554  | 539  | 14  | 2949104 | 932008  | 0 | 0 | 0 | 0 | 3  | 4   | 1996804  | 1 | 1 |
| KIAA0652 | 914919  | 176  | 39  | 1346392 | 381632  | 0 | 0 | 0 | 0 | 7  | 13  | 3919560  | 1 | 1 |
| KIAA0664 | 561252  | 218  | 18  | 3335720 | 968320  | 0 | 0 | 0 | 0 | 2  | 0   | 1602356  | 1 | 1 |
| KIAA0748 | 246749  | 748  | 11  | 1358140 | 356000  | 0 | 0 | 0 | 0 | 21 | 38  | 10326848 | 1 | 1 |
| KIAA0754 | NaN     | NaN  | NaN | 3447504 | 1127808 | 0 | 0 | 0 | 0 | 0  | 0   | 1127808  | 1 | 1 |
| KIAA0776 | 105478  | 1376 | -1  | 2086872 | 539340  | 0 | 0 | 0 | 0 | 4  | 2   | 2033472  | 1 | 1 |
| KIAA0802 | 276661  | 394  | 22  | 3981148 | 1167680 | 0 | 0 | 0 | 0 | 7  | 7   | 4229636  | 1 | 1 |
| KIAA0831 | 739675  | 256  | 39  | 1277684 | 342472  | 0 | 0 | 0 | 0 | 5  | 9   | 3977944  | 1 | 1 |
| KIAA0892 | 920442  | 232  | 2   | 1599508 | 446780  | 0 | 0 | 0 | 0 | 3  | 2   | 1410116  | 1 | 1 |
| KIAA0913 | 1009357 | 191  | 42  | 4576736 | 1437172 | 0 | 0 | 0 | 0 | 0  | 0   | 1437172  | 1 | 1 |
| KIAA0947 | 89016   | 648  | -14 | 5733024 | 1607340 | 0 | 0 | 0 | 0 | 2  | 0   | 2221796  | 1 | 1 |
| KIAA1009 | 51818   | 807  | -15 | 3738712 | 870776  | 0 | 0 | 0 | 0 | 0  | 0   | 870776   | 1 | 1 |
| KIAA1012 | 416975  | 489  | 28  | 3735508 | 985052  | 0 | 0 | 0 | 0 | 2  | 1   | 1512288  | 1 | 1 |
| KIAA1107 | NaN     | NaN  | NaN | 3462456 | 913140  | 0 | 0 | 0 | 0 | 5  | 8   | 3285168  | 1 | 1 |

|          |         |     |     |         |         |   |   |   |   |    |    |          |   |   |
|----------|---------|-----|-----|---------|---------|---|---|---|---|----|----|----------|---|---|
| KIAA1191 | 549164  | 427 | 28  | 784268  | 226060  | 0 | 0 | 1 | 0 | 50 | 60 | 21788980 | 1 | 1 |
| KIAA1199 | 265840  | 460 | 2   | 3546472 | 936992  | 0 | 0 | 0 | 0 | 4  | 4  | 2322900  | 1 | 1 |
| KIAA1239 | NaN     | NaN | NaN | 4382716 | 1227488 | 0 | 0 | 0 | 0 | 0  | 0  | 1227488  | 1 | 1 |
| KIAA1244 | 341233  | 545 | 21  | 5537580 | 1581708 | 0 | 0 | 0 | 0 | 1  | 0  | 1674268  | 1 | 1 |
| KIAA1267 | 388537  | 357 | 21  | 2764696 | 836600  | 0 | 0 | 0 | 0 | 2  | 1  | 1372736  | 1 | 1 |
| KIAA1274 | 549709  | 487 | 39  | 2189044 | 637952  | 0 | 0 | 0 | 0 | 11 | 19 | 7465320  | 1 | 1 |
| KIAA1310 | 889428  | 234 | 44  | 2211828 | 694200  | 0 | 0 | 0 | 0 | 1  | 0  | 822360   | 1 | 1 |
| KIAA1370 | 421095  | 345 | 21  | 2772884 | 728020  | 0 | 0 | 0 | 0 | 24 | 17 | 9626596  | 1 | 1 |
| KIAA1377 | 418167  | 411 | -19 | 2874700 | 750092  | 0 | 0 | 0 | 0 | 0  | 0  | 750092   | 1 | 1 |
| KIAA1383 | 134159  | 644 | -2  | 2600580 | 757212  | 0 | 0 | 0 | 0 | 2  | 2  | 2404780  | 1 | 1 |
| KIAA1409 | 321756  | 678 | 21  | 6369908 | 1709512 | 0 | 0 | 0 | 0 | 0  | 0  | 1709512  | 1 | 1 |
| KIAA1430 | 316425  | 530 | 37  | 1360632 | 364188  | 0 | 0 | 0 | 0 | 50 | 41 | 17128584 | 1 | 1 |
| KIAA1432 | 311104  | 473 | 36  | 3539708 | 953368  | 0 | 0 | 0 | 0 | 3  | 1  | 1608052  | 1 | 1 |
| KIAA1486 | 17102   | 517 | -4  | 1614460 | 502316  | 0 | 0 | 0 | 0 | 19 | 24 | 10236424 | 1 | 1 |
| KIAA1529 | 378658  | 528 | 34  | 4351388 | 1087936 | 0 | 0 | 0 | 0 | 0  | 0  | 1087936  | 1 | 1 |
| KIAA1530 | 1018381 | 507 | 41  | 1813820 | 516556  | 0 | 0 | 0 | 0 | 32 | 50 | 18344324 | 1 | 1 |
| KIAA1539 | 1108514 | 411 | 41  | 1305096 | 451764  | 0 | 0 | 0 | 0 | 17 | 25 | 6408356  | 1 | 1 |
| KIAA1543 | 611341  | 384 | 33  | 3124256 | 1046284 | 0 | 0 | 0 | 0 | 3  | 2  | 2243512  | 1 | 1 |
| KIAA1609 | 584311  | 285 | 14  | 1170528 | 323604  | 0 | 0 | 0 | 0 | 0  | 0  | 323604   | 1 | 1 |
| KIAA1632 | 385282  | 380 | 41  | 6645096 | 1807056 | 0 | 0 | 0 | 0 | 1  | 0  | 2075836  | 1 | 1 |
| KIAA1644 | 218812  | 280 | 16  | 515132  | 143824  | 0 | 0 | 0 | 0 | 50 | 50 | 18401996 | 1 | 1 |
| KIAA1671 | NaN     | NaN | NaN | 4460324 | 1374160 | 0 | 0 | 0 | 0 | 0  | 0  | 1374160  | 1 | 1 |
| KIAA1704 | 685405  | 245 | 40  | 900680  | 222856  | 0 | 0 | 0 | 0 | 50 | 72 | 25667600 | 1 | 1 |
| KIAA1712 | 63527   | 647 | 11  | 1137420 | 281952  | 0 | 0 | 0 | 0 | 50 | 59 | 21722408 | 1 | 1 |
| KIAA1731 | NaN     | NaN | NaN | 6716296 | 1746536 | 0 | 0 | 0 | 0 | 0  | 0  | 1746536  | 1 | 1 |
| KIAA1737 | 520205  | 235 | 60  | 993952  | 300464  | 0 | 0 | 0 | 0 | 7  | 7  | 3171604  | 1 | 1 |
| KIAA1751 | 1343607 | 233 | 33  | 1975444 | 541832  | 0 | 0 | 0 | 0 | 23 | 39 | 10806736 | 1 | 1 |
| KIAA1797 | 125322  | 525 | 20  | 4659328 | 1297976 | 0 | 0 | 0 | 0 | 6  | 7  | 5055200  | 1 | 1 |
| KIAA1804 | 146614  | 392 | 5   | 2566760 | 794236  | 0 | 0 | 0 | 0 | 5  | 0  | 1607696  | 1 | 1 |
| KIAA1826 | 84555   | 890 | -19 | 887152  | 225704  | 0 | 0 | 0 | 0 | 8  | 11 | 3265588  | 1 | 1 |
| KIAA1949 | 2115149 | 171 | 41  | 1488792 | 491280  | 0 | 0 | 0 | 0 | 16 | 25 | 8100068  | 1 | 1 |
| KIAA1967 | 757216  | 224 | 45  | 2339988 | 705948  | 0 | 0 | 0 | 0 | 4  | 2  | 2156648  | 1 | 1 |
| KIAA1984 | 1910405 | 176 | 41  | 1412252 | 361696  | 0 | 0 | 0 | 0 | 50 | 62 | 23187704 | 1 | 1 |

|           |         |      |     |         |        |   |   |   |   |    |     |          |   |   |
|-----------|---------|------|-----|---------|--------|---|---|---|---|----|-----|----------|---|---|
| KILLIN    | NaN     | NaN  | NaN | 427912  | 145604 | 0 | 0 | 0 | 0 | 50 | 116 | 39791188 | 1 | 1 |
| KIR3DP1   | 1071493 | 620  | -17 | 832684  | 243860 | 0 | 0 | 0 | 0 | 50 | 141 | 24027152 | 1 | 1 |
| KISS1     | 557652  | 370  | 34  | 338912  | 114988 | 0 | 0 | 1 | 0 | 9  | 11  | 3453200  | 1 | 1 |
| KISS1R    | 2292363 | 206  | 44  | 947672  | 347812 | 0 | 0 | 0 | 0 | 24 | 28  | 9676436  | 1 | 1 |
| KLF12     | 32882   | 755  | 41  | 1017804 | 303312 | 0 | 0 | 1 | 0 | 50 | 56  | 18501676 | 1 | 1 |
| KLF14     | 241201  | 399  | 35  | 765756  | 274476 | 0 | 0 | 0 | 0 | 23 | 19  | 6565708  | 1 | 1 |
| KLF16     | 2226995 | 214  | 26  | 594164  | 222856 | 0 | 0 | 0 | 0 | 50 | 75  | 24188776 | 1 | 1 |
| KLF2      | 785109  | 258  | 12  | 843720  | 307584 | 0 | 0 | 0 | 0 | 50 | 74  | 23231492 | 1 | 1 |
| KLF7      | 207002  | 598  | 20  | 762908  | 220720 | 0 | 0 | 1 | 0 | 43 | 37  | 16174148 | 1 | 1 |
| KLF9      | 167186  | 278  | 1   | 611252  | 178000 | 0 | 0 | 2 | 0 | 1  | 2   | 403704   | 1 | 1 |
| KLHDC5    | 349689  | 387  | 11  | 1254900 | 377004 | 0 | 0 | 0 | 0 | 50 | 69  | 26720292 | 1 | 1 |
| KLHDC9    | 689033  | 250  | 23  | 915632  | 238876 | 0 | 0 | 0 | 0 | 12 | 19  | 4867588  | 1 | 1 |
| KLHL29    | NaN     | NaN  | NaN | 2020656 | 625848 | 0 | 0 | 0 | 0 | 7  | 14  | 4314008  | 1 | 1 |
| KLHL33    | NaN     | NaN  | NaN | 1283736 | 442152 | 0 | 0 | 0 | 0 | 50 | 116 | 40087736 | 1 | 1 |
| KLK2      | 655673  | 589  | 25  | 699896  | 198292 | 0 | 0 | 2 | 0 | 4  | 6   | 897120   | 1 | 1 |
| KLK4      | 581408  | 606  | 29  | 649344  | 184764 | 0 | 0 | 0 | 0 | 50 | 56  | 18321184 | 1 | 1 |
| KLK7      | 581408  | 606  | 29  | 646140  | 189036 | 0 | 0 | 1 | 0 | 50 | 56  | 18321184 | 1 | 1 |
| KLK9      | 490795  | 632  | 22  | 636884  | 186544 | 0 | 0 | 1 | 0 | 50 | 58  | 16739120 | 1 | 1 |
| KLRAQ1    | 168167  | 780  | 24  | 2066580 | 529728 | 0 | 0 | 0 | 0 | 0  | 0   | 529728   | 1 | 1 |
| KLRC1     | 382960  | 334  | 1   | 619796  | 155572 | 0 | 0 | 0 | 0 | 50 | 54  | 22790052 | 1 | 1 |
| KLRD1     | 406053  | 331  | 1   | 492704  | 109648 | 0 | 0 | 0 | 0 | 50 | 61  | 22130028 | 1 | 1 |
| KLRK1     | 378365  | 334  | 0   | 598436  | 126736 | 0 | 0 | 0 | 0 | 50 | 50  | 21701404 | 1 | 1 |
| KMO       | 171933  | 382  | -17 | 1297264 | 325028 | 0 | 0 | 0 | 0 | 50 | 41  | 21048144 | 1 | 1 |
| KNCN      | 608423  | 266  | 25  | 255252  | 80100  | 0 | 0 | 0 | 0 | 50 | 58  | 19047424 | 1 | 1 |
| KPNA7     | NaN     | NaN  | NaN | 1309012 | 385904 | 0 | 0 | 0 | 0 | 50 | 116 | 40031488 | 1 | 1 |
| KRT86     | 839631  | 175  | 48  | 1238880 | 357780 | 0 | 0 | 0 | 0 | 8  | 13  | 4005000  | 1 | 1 |
| KRTAP1-3  | 977588  | 404  | 10  | 428268  | 112140 | 0 | 0 | 1 | 0 | 50 | 68  | 14276668 | 1 | 1 |
| κRTAP10-1 | 860604  | 461  | 30  | 699896  | 208972 | 0 | 0 | 2 | 0 | 0  | 2   | 208972   | 1 | 1 |
| κRTAP10-1 | 819099  | 391  | 35  | 604488  | 185832 | 0 | 0 | 0 | 0 | 50 | 61  | 23447584 | 1 | 1 |
| κRTAP10-2 | 860604  | 461  | 30  | 636528  | 185832 | 0 | 0 | 1 | 0 | 50 | 62  | 22093360 | 1 | 1 |
| κRTAP10-4 | 860604  | 461  | 30  | 1000716 | 289428 | 0 | 0 | 1 | 0 | 50 | 62  | 22093360 | 1 | 1 |
| κRTAP12-1 | 874480  | 461  | 25  | 243860  | 71200  | 0 | 0 | 1 | 0 | 8  | 6   | 1620512  | 1 | 1 |
| κRTAP19-1 | 14979   | 1035 | -68 | 199360  | 63368  | 0 | 0 | 0 | 0 | 50 | 77  | 14168444 | 1 | 1 |

|           |         |      |     |         |        |   |   |   |   |    |     |          |   |   |
|-----------|---------|------|-----|---------|--------|---|---|---|---|----|-----|----------|---|---|
| ζRTAP19-0 | 22916   | 1048 | -79 | 147384  | 43788  | 0 | 0 | 0 | 0 | 50 | 84  | 16257808 | 1 | 1 |
| ζRTAP19-1 | 22916   | 1048 | -79 | 159132  | 44856  | 0 | 0 | 0 | 0 | 50 | 84  | 16257808 | 1 | 1 |
| ζRTAP19-2 | 200531  | 972  | -45 | 165184  | 44144  | 0 | 0 | 0 | 0 | 50 | 66  | 17353576 | 1 | 1 |
| KRTAP2-1  | NaN     | NaN  | NaN | 315772  | 99680  | 0 | 0 | 0 | 0 | 50 | 116 | 39745264 | 1 | 1 |
| KRTAP2-2  | NaN     | NaN  | NaN | 301888  | 95408  | 0 | 0 | 0 | 0 | 50 | 116 | 39740992 | 1 | 1 |
| KRTAP2-4  | NaN     | NaN  | NaN | 315416  | 100036 | 0 | 0 | 0 | 0 | 50 | 116 | 39745620 | 1 | 1 |
| ζRTAP20-1 | 28000   | 1055 | -80 | 162336  | 48060  | 0 | 0 | 0 | 0 | 50 | 90  | 15947376 | 1 | 1 |
| ζRTAP20-2 | NaN     | NaN  | NaN | 116768  | 29548  | 0 | 0 | 0 | 0 | 50 | 116 | 39675132 | 1 | 1 |
| ζRTAP21-1 | NaN     | NaN  | NaN | 159132  | 34176  | 0 | 0 | 0 | 0 | 50 | 116 | 39679760 | 1 | 1 |
| ζRTAP22-1 | NaN     | NaN  | NaN | 121040  | 28480  | 0 | 0 | 0 | 0 | 50 | 116 | 39674064 | 1 | 1 |
| ζRTAP25-1 | NaN     | NaN  | NaN | 268780  | 65504  | 0 | 0 | 0 | 0 | 50 | 116 | 39711088 | 1 | 1 |
| KRTAP3-3  | 977588  | 404  | 10  | 242792  | 76540  | 0 | 0 | 0 | 0 | 50 | 68  | 14276668 | 1 | 1 |
| KRTAP4-1  | 996799  | 468  | -7  | 328944  | 87576  | 0 | 0 | 2 | 0 | 8  | 3   | 991104   | 1 | 1 |
| KRTAP4-2  | 996799  | 468  | -7  | 350660  | 90424  | 0 | 0 | 0 | 0 | 50 | 60  | 17141400 | 1 | 1 |
| KRTAP4-3  | 996799  | 468  | -7  | 505520  | 122464 | 0 | 0 | 0 | 0 | 50 | 60  | 17141400 | 1 | 1 |
| KRTAP4-8  | NaN     | NaN  | NaN | 476328  | 121752 | 0 | 0 | 0 | 0 | 50 | 116 | 39767336 | 1 | 1 |
| ζRTAP5-10 | 586193  | 626  | 50  | 504096  | 148452 | 0 | 0 | 0 | 0 | 40 | 36  | 13709560 | 1 | 1 |
| KRTAP5-2  | NaN     | NaN  | NaN | 444644  | 127804 | 0 | 0 | 0 | 0 | 50 | 116 | 39773388 | 1 | 1 |
| KRTAP5-3  | NaN     | NaN  | NaN | 599860  | 168032 | 0 | 0 | 0 | 0 | 50 | 116 | 39813616 | 1 | 1 |
| KRTAP5-5  | NaN     | NaN  | NaN | 590960  | 173728 | 0 | 0 | 0 | 0 | 50 | 116 | 39819312 | 1 | 1 |
| KRTAP5-6  | NaN     | NaN  | NaN | 326808  | 91848  | 0 | 0 | 0 | 0 | 50 | 116 | 39737432 | 1 | 1 |
| KRTAP5-9  | 586193  | 626  | 50  | 429692  | 114988 | 0 | 0 | 0 | 0 | 41 | 39  | 13806036 | 1 | 1 |
| KRTAP6-1  | 22916   | 1048 | -79 | 177644  | 55180  | 0 | 0 | 0 | 0 | 50 | 84  | 16257808 | 1 | 1 |
| KRTAP6-3  | 22916   | 1048 | -79 | 276256  | 81524  | 0 | 0 | 1 | 0 | 43 | 66  | 10445752 | 1 | 1 |
| KRTAP7-1  | NaN     | NaN  | NaN | 223212  | 60876  | 0 | 0 | 0 | 0 | 50 | 116 | 39706460 | 1 | 1 |
| KRTAP9-3  | 996799  | 468  | -7  | 409756  | 105020 | 0 | 0 | 0 | 0 | 50 | 60  | 17141400 | 1 | 1 |
| KRTDAP    | 827597  | 367  | 29  | 271984  | 74048  | 0 | 0 | 0 | 0 | 50 | 50  | 19263872 | 1 | 1 |
| KTELC1    | 280646  | 599  | 33  | 1044860 | 259168 | 0 | 0 | 0 | 0 | 40 | 25  | 13091188 | 1 | 1 |
| L3MBTL    | 321277  | 399  | -2  | 2089008 | 561768 | 0 | 0 | 0 | 0 | 2  | 0   | 1046284  | 1 | 1 |
| LAGE3     | 2163759 | NaN  | 42  | 347100  | 122820 | 0 | 0 | 0 | 0 | 50 | 72  | 22102972 | 1 | 1 |
| LALBA     | 1494035 | 421  | 25  | 383056  | 90068  | 0 | 0 | 2 | 0 | 1  | 3   | 371308   | 1 | 1 |
| LAPTM4B   | 609859  | 175  | 39  | 798152  | 246352 | 0 | 0 | 0 | 0 | 50 | 44  | 20926036 | 1 | 1 |
| LASS1     | 1346431 | 176  | 24  | 885016  | 269492 | 0 | 0 | 0 | 0 | 50 | 70  | 20858752 | 1 | 1 |

|          |         |     |     |         |        |   |   |   |   |    |     |          |   |   |
|----------|---------|-----|-----|---------|--------|---|---|---|---|----|-----|----------|---|---|
| LASS2    | 1621279 | 172 | 30  | 996444  | 270204 | 0 | 0 | 0 | 0 | 33 | 60  | 14315472 | 1 | 1 |
| LASS3    | 239951  | 474 | -31 | 1027772 | 244216 | 0 | 0 | 0 | 0 | 50 | 93  | 22407708 | 1 | 1 |
| LASS4    | 826957  | 209 | 15  | 1014600 | 292632 | 0 | 0 | 0 | 0 | 50 | 62  | 22292720 | 1 | 1 |
| LASS5    | 1040456 | 192 | 58  | 1029552 | 270204 | 0 | 0 | 0 | 0 | 5  | 3   | 1138488  | 1 | 1 |
| LASS6    | 192358  | 937 | 21  | 1007124 | 264864 | 0 | 0 | 0 | 0 | 50 | 38  | 20880824 | 1 | 1 |
| LAT      | 1148899 | 257 | 51  | 781776  | 225348 | 0 | 0 | 3 | 0 | 1  | 4   | 349592   | 1 | 1 |
| LBX1     | 572649  | 418 | 43  | 685300  | 222500 | 0 | 0 | 1 | 0 | 50 | 61  | 24181300 | 1 | 1 |
| LBXCOR1  | 305591  | 319 | 21  | 2263804 | 728732 | 0 | 0 | 0 | 0 | 3  | 2   | 2719128  | 1 | 1 |
| LCE1A    | 62450   | 804 | 15  | 276612  | 77964  | 0 | 0 | 0 | 0 | 50 | 49  | 19136780 | 1 | 1 |
| LCE1B    | 64902   | 818 | 18  | 296192  | 85084  | 0 | 0 | 0 | 0 | 50 | 55  | 20674344 | 1 | 1 |
| LCE1D    | 64902   | 818 | 18  | 292988  | 81880  | 0 | 0 | 2 | 0 | 0  | 2   | 81880    | 1 | 1 |
| LCE1E    | 64902   | 818 | 18  | 302244  | 83304  | 0 | 0 | 1 | 0 | 13 | 28  | 5373820  | 1 | 1 |
| LCE2C    | 169158  | 818 | 24  | 280884  | 79032  | 0 | 0 | 0 | 0 | 50 | 53  | 20184132 | 1 | 1 |
| LCE3B    | 285984  | 752 | 17  | 238520  | 67996  | 0 | 0 | 0 | 0 | 50 | 58  | 22596388 | 1 | 1 |
| LCE3C    | 285984  | 752 | 17  | 241012  | 67640  | 0 | 0 | 0 | 0 | 50 | 58  | 22596388 | 1 | 1 |
| LCE3E    | 285984  | 752 | 17  | 234248  | 67996  | 0 | 0 | 0 | 0 | 50 | 58  | 22596388 | 1 | 1 |
| LCE4A    | 169158  | 818 | 24  | 255964  | 68708  | 0 | 0 | 0 | 0 | 50 | 53  | 20184132 | 1 | 1 |
| LCE6A    | NaN     | NaN | NaN | 207192  | 56604  | 0 | 0 | 0 | 0 | 50 | 116 | 39702188 | 1 | 1 |
| LCN10    | 1898901 | 190 | 39  | 515488  | 152012 | 0 | 0 | 0 | 0 | 50 | 67  | 24888672 | 1 | 1 |
| LCN12    | 1979517 | 188 | 34  | 501960  | 142044 | 0 | 0 | 1 | 0 | 16 | 30  | 5786424  | 1 | 1 |
| LCN6     | 1898901 | 190 | 39  | 425776  | 123176 | 0 | 0 | 0 | 0 | 50 | 67  | 24888672 | 1 | 1 |
| LCNL1    | 1979517 | 188 | 34  | 408688  | 128516 | 0 | 0 | 0 | 0 | 50 | 78  | 21046364 | 1 | 1 |
| LDHA     | 599909  | 176 | 42  | 1027416 | 263796 | 0 | 0 | 0 | 0 | 50 | 55  | 21406992 | 1 | 1 |
| LEFTY1   | 924499  | 239 | 8   | 898544  | 292276 | 0 | 0 | 0 | 0 | 7  | 5   | 3057684  | 1 | 1 |
| LELP1    | 822908  | 602 | 28  | 255608  | 65860  | 0 | 0 | 0 | 0 | 50 | 85  | 27475012 | 1 | 1 |
| LENEP    | 1612870 | 224 | 35  | 154504  | 50552  | 0 | 0 | 0 | 0 | 50 | 56  | 18488504 | 1 | 1 |
| LEP      | 925335  | 373 | 30  | 422216  | 124600 | 0 | 0 | 0 | 0 | 50 | 50  | 19541196 | 1 | 1 |
| LEPRE1   | 820426  | 426 | 30  | 1903888 | 537560 | 0 | 0 | 0 | 0 | 11 | 7   | 4652208  | 1 | 1 |
| LEPREL1  | 165372  | 399 | 3   | 1819516 | 511928 | 0 | 0 | 0 | 0 | 17 | 12  | 7975824  | 1 | 1 |
| LEPREL2  | 2822601 | 232 | 32  | 1830196 | 592028 | 0 | 0 | 0 | 0 | 14 | 18  | 6079412  | 1 | 1 |
| LEPROTL1 | 387693  | 231 | 51  | 526880  | 157708 | 0 | 0 | 0 | 0 | 50 | 42  | 19128948 | 1 | 1 |
| LETM2    | 841740  | 381 | 49  | 1019228 | 286936 | 0 | 0 | 0 | 0 | 50 | 76  | 25273152 | 1 | 1 |
| LEUTX    | NaN     | NaN | NaN | 425776  | 122108 | 0 | 0 | 0 | 0 | 50 | 116 | 39767692 | 1 | 1 |



|           |         |     |     |         |        |   |   |   |   |    |     |          |   |   |
|-----------|---------|-----|-----|---------|--------|---|---|---|---|----|-----|----------|---|---|
| LGALS1    | 1136064 | 180 | 65  | 356000  | 96832  | 0 | 0 | 1 | 0 | 24 | 18  | 7824168  | 1 | 1 |
| LGALS2    | 991778  | 176 | 51  | 351728  | 89356  | 0 | 0 | 0 | 0 | 50 | 60  | 20105812 | 1 | 1 |
| LGALS3    | 801045  | 143 | 47  | 709508  | 208972 | 0 | 0 | 0 | 0 | 50 | 68  | 21306600 | 1 | 1 |
| LGALS3BF  | 632955  | 177 | 28  | 1458176 | 440728 | 0 | 0 | 0 | 0 | 1  | 0   | 1286228  | 1 | 1 |
| LGALS7    | 1697047 | 322 | 45  | 348168  | 107868 | 0 | 0 | 0 | 0 | 50 | 82  | 22226860 | 1 | 1 |
| LGALS7B   | 1697047 | 322 | 45  | 348168  | 107868 | 0 | 0 | 0 | 0 | 50 | 82  | 22226860 | 1 | 1 |
| LGALS8    | 464894  | 556 | 5   | 946604  | 246352 | 0 | 0 | 0 | 0 | 50 | 64  | 22818176 | 1 | 1 |
| LGALS9B   | 384584  | 413 | -6  | 929160  | 256320 | 0 | 0 | 0 | 0 | 11 | 24  | 6624448  | 1 | 1 |
| LGALS9C   | 928601  | 254 | 0   | 933076  | 255608 | 0 | 0 | 1 | 0 | 50 | 52  | 17516624 | 1 | 1 |
| LGTN      | 504002  | 288 | 38  | 1514068 | 420080 | 0 | 0 | 0 | 0 | 32 | 22  | 11458216 | 1 | 1 |
| LHFPL1    | 25206   | NaN | 7   | 560344  | 160556 | 0 | 0 | 1 | 0 | 50 | 77  | 25634136 | 1 | 1 |
| LHX6      | 220092  | 528 | 30  | 1053048 | 307584 | 0 | 0 | 1 | 0 | 50 | 54  | 20193388 | 1 | 1 |
| LILRA3    | 730281  | 458 | -8  | 1099328 | 340336 | 0 | 0 | 0 | 0 | 9  | 12  | 3447148  | 1 | 1 |
| LIMD2     | 935285  | 319 | 8   | 341404  | 85796  | 0 | 0 | 0 | 0 | 50 | 76  | 15668628 | 1 | 1 |
| LIMS3     | NaN     | NaN | NaN | 613744  | 159488 | 0 | 0 | 0 | 0 | 50 | 116 | 39805072 | 1 | 1 |
| LIN28B    | 108630  | 702 | -4  | 639732  | 177288 | 0 | 0 | 0 | 0 | 50 | 63  | 20781856 | 1 | 1 |
| LIN9      | 739974  | 278 | 21  | 1472060 | 378784 | 0 | 0 | 1 | 0 | 43 | 57  | 19098688 | 1 | 1 |
| LINS1     | 290809  | 374 | -9  | 1940912 | 512284 | 0 | 0 | 0 | 0 | 24 | 13  | 9389856  | 1 | 1 |
| LIPK      | 160610  | 327 | 36  | 1051268 | 262372 | 0 | 0 | 1 | 0 | 50 | 63  | 20127172 | 1 | 1 |
| LIPM      | NaN     | NaN | NaN | 1111788 | 283020 | 0 | 0 | 0 | 0 | 50 | 116 | 39928604 | 1 | 1 |
| LIPT2     | NaN     | NaN | NaN | 548952  | 200784 | 0 | 0 | 0 | 0 | 50 | 116 | 39846368 | 1 | 1 |
| LLPH      | 243040  | 696 | 5   | 348880  | 76184  | 0 | 0 | 2 | 0 | 1  | 2   | 254540   | 1 | 1 |
| LMO1      | 245012  | 535 | 10  | 414384  | 101460 | 0 | 0 | 0 | 0 | 50 | 63  | 23938152 | 1 | 1 |
| OC1001280 | NaN     | NaN | NaN | 307584  | 111072 | 0 | 0 | 0 | 0 | 50 | 116 | 39756656 | 1 | 1 |
| OC1001285 | NaN     | NaN | NaN | 399432  | 121752 | 0 | 0 | 0 | 0 | 50 | 116 | 39767336 | 1 | 1 |
| OC1001302 | NaN     | NaN | NaN | 1029908 | 383056 | 0 | 0 | 0 | 0 | 50 | 116 | 40028640 | 1 | 1 |
| OC1001309 | NaN     | NaN | NaN | 193664  | 46636  | 0 | 0 | 0 | 0 | 50 | 116 | 39692220 | 1 | 1 |
| OC1001309 | NaN     | NaN | NaN | 162336  | 43788  | 0 | 0 | 0 | 0 | 50 | 116 | 39689372 | 1 | 1 |
| OC1001318 | NaN     | NaN | NaN | 209684  | 45568  | 0 | 0 | 0 | 0 | 50 | 116 | 39691152 | 1 | 1 |
| OC1001322 | NaN     | NaN | NaN | 2760780 | 898188 | 0 | 0 | 0 | 0 | 5  | 8   | 3270216  | 1 | 1 |
| OC1001329 | NaN     | NaN | NaN | 257032  | 76184  | 0 | 0 | 0 | 0 | 50 | 116 | 39721768 | 1 | 1 |
| OC1001338 | NaN     | NaN | NaN | 863656  | 239588 | 0 | 0 | 0 | 0 | 50 | 116 | 39885172 | 1 | 1 |
| OC1002874 | NaN     | NaN | NaN | 962624  | 318976 | 0 | 0 | 0 | 0 | 50 | 116 | 39964560 | 1 | 1 |

|           |         |     |     |         |         |   |   |   |   |    |     |          |   |   |
|-----------|---------|-----|-----|---------|---------|---|---|---|---|----|-----|----------|---|---|
| OC1002877 | NaN     | NaN | NaN | 574940  | 156640  | 0 | 0 | 0 | 0 | 50 | 116 | 39802224 | 1 | 1 |
| OC1002887 | NaN     | NaN | NaN | 369528  | 124956  | 0 | 0 | 0 | 0 | 50 | 116 | 39770540 | 1 | 1 |
| OC1003026 | 223391  | 572 | -10 | 1433968 | 391244  | 0 | 0 | 0 | 0 | 14 | 11  | 6258836  | 1 | 1 |
| LOC150786 | 456915  | 540 | 2   | 632256  | 184764  | 0 | 0 | 0 | 0 | 50 | 92  | 26952404 | 1 | 1 |
| LOC153328 | 471108  | 443 | 23  | 405840  | 117480  | 0 | 0 | 0 | 0 | 50 | 57  | 22870864 | 1 | 1 |
| LOC200030 | NaN     | NaN | NaN | 4183000 | 1039520 | 0 | 0 | 0 | 0 | 0  | 0   | 1039520  | 1 | 1 |
| LOC200726 | 269047  | 832 | 14  | 466360  | 125312  | 0 | 0 | 0 | 0 | 50 | 51  | 16973724 | 1 | 1 |
| LOC221710 | 251884  | 409 | 26  | 227484  | 71556   | 0 | 0 | 0 | 0 | 50 | 57  | 20107948 | 1 | 1 |
| LOC283999 | NaN     | NaN | NaN | 924888  | 353508  | 0 | 0 | 0 | 0 | 50 | 116 | 39999092 | 1 | 1 |
| LOC285033 | 904852  | 213 | 43  | 306160  | 94340   | 0 | 0 | 0 | 0 | 50 | 63  | 24111168 | 1 | 1 |
| LOC286238 | 126536  | 629 | 8   | 290496  | 75828   | 0 | 0 | 0 | 0 | 50 | 60  | 20316920 | 1 | 1 |
| LOC339047 | NaN     | NaN | NaN | 1911008 | 532576  | 0 | 0 | 0 | 0 | 9  | 16  | 4890016  | 1 | 1 |
| LOC342346 | NaN     | NaN | NaN | 2861528 | 860452  | 0 | 0 | 0 | 0 | 7  | 14  | 4548612  | 1 | 1 |
| LOC360030 | NaN     | NaN | NaN | 509436  | 111072  | 0 | 0 | 0 | 0 | 50 | 116 | 39756656 | 1 | 1 |
| LOC375190 | NaN     | NaN | NaN | 881100  | 201852  | 0 | 0 | 0 | 0 | 50 | 116 | 39847436 | 1 | 1 |
| LOC388588 | NaN     | NaN | NaN | 207548  | 56248   | 0 | 0 | 0 | 0 | 50 | 116 | 39701832 | 1 | 1 |
| LOC388946 | NaN     | NaN | NaN | 563192  | 150232  | 0 | 0 | 0 | 0 | 50 | 116 | 39795816 | 1 | 1 |
| LOC389333 | NaN     | NaN | NaN | 2369180 | 888220  | 0 | 0 | 0 | 0 | 5  | 8   | 3260248  | 1 | 1 |
| LOC389493 | NaN     | NaN | NaN | 241368  | 79032   | 0 | 0 | 0 | 0 | 50 | 116 | 39724616 | 1 | 1 |
| LOC390594 | NaN     | NaN | NaN | 928092  | 315060  | 0 | 0 | 0 | 0 | 50 | 116 | 39960644 | 1 | 1 |
| LOC391322 | NaN     | NaN | NaN | 301888  | 101816  | 0 | 0 | 0 | 0 | 50 | 116 | 39747400 | 1 | 1 |
| LOC400696 | NaN     | NaN | NaN | 398008  | 103952  | 0 | 0 | 0 | 0 | 50 | 116 | 39749536 | 1 | 1 |
| LOC401052 | 944872  | 170 | 42  | 297616  | 87932   | 0 | 0 | 0 | 0 | 50 | 62  | 23148188 | 1 | 1 |
| LOC401097 | NaN     | NaN | NaN | 570312  | 224280  | 0 | 0 | 0 | 0 | 50 | 116 | 39869864 | 1 | 1 |
| LOC401387 | NaN     | NaN | NaN | 2203996 | 576008  | 0 | 0 | 0 | 0 | 7  | 14  | 4264168  | 1 | 1 |
| LOC402644 | NaN     | NaN | NaN | 408332  | 101104  | 0 | 0 | 0 | 0 | 50 | 116 | 39746688 | 1 | 1 |
| LOC402778 | NaN     | NaN | NaN | 324672  | 99324   | 0 | 0 | 0 | 0 | 50 | 116 | 39744908 | 1 | 1 |
| LOC440563 | NaN     | NaN | NaN | 742972  | 201140  | 0 | 0 | 0 | 0 | 50 | 116 | 39846724 | 1 | 1 |
| LOC441056 | NaN     | NaN | NaN | 4553240 | 1677472 | 0 | 0 | 0 | 0 | 0  | 0   | 1677472  | 1 | 1 |
| LOC441294 | 368082  | 372 | -17 | 1953728 | 540052  | 0 | 0 | 0 | 0 | 5  | 1   | 1889648  | 1 | 1 |
| LOC441869 | NaN     | NaN | NaN | 925600  | 366680  | 0 | 0 | 0 | 0 | 50 | 116 | 40012264 | 1 | 1 |
| LOC55908  | 1691034 | 233 | 32  | 489856  | 162692  | 0 | 0 | 0 | 0 | 50 | 70  | 21150672 | 1 | 1 |
| LOC642587 | 199789  | 427 | -2  | 253116  | 85440   | 0 | 0 | 0 | 0 | 50 | 45  | 22610984 | 1 | 1 |

|           |         |      |     |          |         |   |   |   |   |    |     |          |   |   |
|-----------|---------|------|-----|----------|---------|---|---|---|---|----|-----|----------|---|---|
| LOC642597 | NaN     | NaN  | NaN | 184764   | 43788   | 0 | 0 | 0 | 0 | 50 | 116 | 39689372 | 1 | 1 |
| LOC643008 | NaN     | NaN  | NaN | 197936   | 60520   | 0 | 0 | 0 | 0 | 50 | 116 | 39706104 | 1 | 1 |
| LOC643596 | NaN     | NaN  | NaN | 377716   | 129584  | 0 | 0 | 0 | 0 | 50 | 116 | 39775168 | 1 | 1 |
| LOC643677 | NaN     | NaN  | NaN | 18000784 | 4704896 | 0 | 0 | 0 | 0 | 0  | 0   | 4704896  | 1 | 1 |
| LOC644538 | NaN     | NaN  | NaN | 198292   | 70844   | 0 | 0 | 0 | 0 | 50 | 116 | 39716428 | 1 | 1 |
| LOC645961 | NaN     | NaN  | NaN | 2790684  | 860808  | 0 | 0 | 0 | 0 | 7  | 14  | 4548968  | 1 | 1 |
| LOC646498 | 1812695 | 203  | 45  | 524032   | 146672  | 0 | 0 | 0 | 0 | 50 | 80  | 19955580 | 1 | 1 |
| LOC646627 | NaN     | NaN  | NaN | 190816   | 65504   | 0 | 0 | 0 | 0 | 50 | 116 | 39711088 | 1 | 1 |
| LOC646851 | NaN     | NaN  | NaN | 1534360  | 363476  | 0 | 0 | 0 | 0 | 50 | 116 | 40009060 | 1 | 1 |
| LOC647309 | NaN     | NaN  | NaN | 861876   | 230688  | 0 | 0 | 0 | 0 | 50 | 116 | 39876272 | 1 | 1 |
| LOC649330 | 118495  | 792  | 12  | 746176   | 200072  | 0 | 0 | 0 | 0 | 50 | 47  | 18244288 | 1 | 1 |
| LOC653486 | NaN     | NaN  | NaN | 250980   | 69420   | 0 | 0 | 0 | 0 | 50 | 116 | 39715004 | 1 | 1 |
| LOC653543 | NaN     | NaN  | NaN | 2364908  | 863656  | 0 | 0 | 0 | 0 | 7  | 14  | 4551816  | 1 | 1 |
| LOC653544 | NaN     | NaN  | NaN | 6835200  | 2520480 | 0 | 0 | 0 | 0 | 0  | 0   | 2520480  | 1 | 1 |
| LOC653545 | NaN     | NaN  | NaN | 6835200  | 2520480 | 0 | 0 | 0 | 0 | 0  | 0   | 2520480  | 1 | 1 |
| LOC653548 | NaN     | NaN  | NaN | 6835200  | 2520480 | 0 | 0 | 0 | 0 | 0  | 0   | 2520480  | 1 | 1 |
| LOC728392 | NaN     | NaN  | NaN | 287292   | 97188   | 0 | 0 | 0 | 0 | 50 | 116 | 39742772 | 1 | 1 |
| LOC728410 | NaN     | NaN  | NaN | 5696000  | 2100400 | 0 | 0 | 0 | 0 | 0  | 0   | 2100400  | 1 | 1 |
| LOC728819 | NaN     | NaN  | NaN | 805272   | 207192  | 0 | 0 | 0 | 0 | 50 | 116 | 39852776 | 1 | 1 |
| LOC729020 | NaN     | NaN  | NaN | 574940   | 158776  | 0 | 0 | 0 | 0 | 50 | 116 | 39804360 | 1 | 1 |
| LOC729991 | NaN     | NaN  | NaN | 328232   | 81880   | 0 | 0 | 0 | 0 | 50 | 116 | 39727464 | 1 | 1 |
| 729991-ME | NaN     | NaN  | NaN | 962980   | 239588  | 0 | 0 | 0 | 0 | 50 | 116 | 39885172 | 1 | 1 |
| LOC730755 | NaN     | NaN  | NaN | 315416   | 100036  | 0 | 0 | 0 | 0 | 50 | 116 | 39745620 | 1 | 1 |
| LOC81691  | 244139  | 580  | 32  | 2011756  | 552512  | 0 | 0 | 0 | 0 | 11 | 12  | 4334300  | 1 | 1 |
| LOR       | 836876  | 556  | 24  | 732292   | 274832  | 0 | 0 | 0 | 0 | 44 | 89  | 28132900 | 1 | 1 |
| LOXHD1    | NaN     | NaN  | NaN | 5935232  | 1566400 | 0 | 0 | 0 | 0 | 0  | 0   | 1566400  | 1 | 1 |
| LPAR5     | 2816983 | 210  | 61  | 867572   | 327520  | 0 | 0 | 0 | 0 | 25 | 55  | 15777920 | 1 | 1 |
| LPCAT4    | 542657  | 234  | 22  | 1318268  | 421504  | 0 | 0 | 2 | 0 | 50 | 46  | 18844148 | 1 | 1 |
| LPHN1     | 1036713 | 321  | 25  | 3682464  | 1141692 | 0 | 0 | 0 | 0 | 1  | 0   | 1308656  | 1 | 1 |
| LPHN2     | 55308   | 1274 | -19 | 3604500  | 975084  | 0 | 0 | 0 | 0 | 4  | 1   | 2875412  | 1 | 1 |
| LPHN3     | 11170   | 1494 | -18 | 3762208  | 1041656 | 0 | 0 | 0 | 0 | 1  | 0   | 1354936  | 1 | 1 |
| LPPR1     | 135891  | 952  | -29 | 833040   | 241368  | 0 | 0 | 0 | 0 | 50 | 98  | 23524480 | 1 | 1 |
| LPPR3     | 2168802 | 198  | 28  | 1809192  | 611964  | 0 | 0 | 1 | 0 | 50 | 73  | 22578944 | 1 | 1 |

|           |         |      |     |         |         |   |   |   |   |    |     |          |   |   |
|-----------|---------|------|-----|---------|---------|---|---|---|---|----|-----|----------|---|---|
| LPXN      | 237619  | 644  | -4  | 1041300 | 264864  | 0 | 0 | 0 | 0 | 50 | 56  | 23443312 | 1 | 1 |
| LRDD      | 1793686 | 176  | 50  | 2209692 | 777504  | 0 | 0 | 0 | 0 | 1  | 0   | 901392   | 1 | 1 |
| LRP11     | 423793  | 234  | 42  | 1230692 | 400144  | 0 | 0 | 1 | 0 | 50 | 37  | 17400924 | 1 | 1 |
| LRRC10B   | NaN     | NaN  | NaN | 679960  | 258812  | 0 | 0 | 0 | 0 | 50 | 116 | 39904396 | 1 | 1 |
| LRRC20    | 551999  | 225  | 45  | 471344  | 138484  | 0 | 0 | 0 | 0 | 50 | 39  | 20343976 | 1 | 1 |
| LRRC24    | 1755818 | 291  | 7   | 1218588 | 447492  | 0 | 0 | 1 | 0 | 24 | 29  | 10834860 | 1 | 1 |
| LRRC26    | 1722012 | 202  | 36  | 763976  | 318976  | 0 | 0 | 0 | 0 | 3  | 3   | 2037744  | 1 | 1 |
| LRRC29    | 1109491 | 150  | 46  | 558208  | 180848  | 0 | 0 | 0 | 0 | 50 | 47  | 19075192 | 1 | 1 |
| LRRC33    | 1117984 | 250  | 31  | 1677116 | 551800  | 0 | 0 | 0 | 0 | 6  | 4   | 4027428  | 1 | 1 |
| LRRC37A   | 372453  | 231  | 22  | 4253132 | 1256680 | 0 | 0 | 0 | 0 | 5  | 0   | 3225360  | 1 | 1 |
| LRRC50    | 566339  | 315  | 12  | 1857252 | 520116  | 0 | 0 | 0 | 0 | 18 | 22  | 9182664  | 1 | 1 |
| LRRC58    | 384022  | 358  | 6   | 909936  | 296904  | 0 | 0 | 1 | 0 | 50 | 46  | 20144260 | 1 | 1 |
| LRRC67    | 393936  | 518  | 12  | 597368  | 157708  | 0 | 0 | 0 | 0 | 50 | 60  | 21748396 | 1 | 1 |
| LRRC69    | NaN     | NaN  | NaN | 909580  | 237452  | 0 | 0 | 0 | 0 | 50 | 116 | 39883036 | 1 | 1 |
| LRRN4CL   | 2425755 | 248  | 51  | 569600  | 200428  | 0 | 0 | 0 | 0 | 50 | 68  | 20007556 | 1 | 1 |
| LRTOMT    | 731498  | 267  | 60  | 1208620 | 385904  | 0 | 0 | 2 | 0 | 31 | 33  | 12046684 | 1 | 1 |
| LSM1      | 705837  | 277  | 46  | 347456  | 94696   | 0 | 0 | 1 | 0 | 10 | 15  | 3794960  | 1 | 1 |
| LSM3      | 303635  | 258  | 39  | 269136  | 73692   | 0 | 0 | 0 | 0 | 50 | 49  | 17059520 | 1 | 1 |
| LSM4      | 1294357 | 210  | 39  | 364900  | 100748  | 0 | 0 | 0 | 0 | 50 | 67  | 22067728 | 1 | 1 |
| LSM5      | 371992  | 639  | 6   | 249200  | 64792   | 0 | 0 | 0 | 0 | 50 | 69  | 19642656 | 1 | 1 |
| LSM6      | 82460   | 1023 | 21  | 218228  | 54112   | 0 | 0 | 0 | 0 | 50 | 48  | 21101900 | 1 | 1 |
| LSMD1     | 2148615 | 337  | 24  | 420080  | 143824  | 0 | 0 | 0 | 0 | 50 | 73  | 27995840 | 1 | 1 |
| LSST-3TM1 | 487942  | 773  | -31 | 1661096 | 441796  | 0 | 0 | 0 | 0 | 9  | 5   | 3775736  | 1 | 1 |
| LTB4R     | 915114  | 220  | 38  | 823072  | 312212  | 0 | 0 | 1 | 0 | 50 | 69  | 21077692 | 1 | 1 |
| LUZP4     | 226836  | NaN  | 8   | 811680  | 209328  | 0 | 0 | 0 | 0 | 50 | 69  | 23846304 | 1 | 1 |
| LUZP6     | NaN     | NaN  | NaN | 144892  | 44144   | 0 | 0 | 0 | 0 | 50 | 116 | 39689728 | 1 | 1 |
| LY6D      | 427585  | 373  | 34  | 322892  | 101104  | 0 | 0 | 0 | 0 | 50 | 60  | 17573228 | 1 | 1 |
| LY6E      | 795935  | 470  | 13  | 335352  | 104664  | 0 | 0 | 1 | 0 | 1  | 2   | 333216   | 1 | 1 |
| LY6G5C    | 2517236 | 193  | 20  | 388752  | 103596  | 0 | 0 | 0 | 0 | 50 | 63  | 27465044 | 1 | 1 |
| LY6G6C    | 2517236 | 193  | 20  | 318976  | 95408   | 0 | 0 | 0 | 0 | 50 | 63  | 27465044 | 1 | 1 |
| LY6G6D    | 2517236 | 193  | 20  | 335708  | 102172  | 0 | 0 | 1 | 0 | 1  | 1   | 233536   | 1 | 1 |
| LY6G6F    | 2517236 | 193  | 20  | 751160  | 227128  | 0 | 0 | 0 | 0 | 50 | 63  | 27465044 | 1 | 1 |
| LY6K      | 384374  | 412  | 23  | 561412  | 137060  | 0 | 0 | 1 | 0 | 11 | 7   | 4009272  | 1 | 1 |

|         |         |      |     |         |         |   |   |   |   |    |     |          |   |   |
|---------|---------|------|-----|---------|---------|---|---|---|---|----|-----|----------|---|---|
| LY86    | 133091  | 314  | 29  | 430404  | 111072  | 0 | 0 | 0 | 0 | 50 | 58  | 21463952 | 1 | 1 |
| LYPD1   | 46944   | 848  | 8   | 365612  | 97900   | 0 | 0 | 1 | 0 | 0  | 1   | 97900    | 1 | 1 |
| LYPD2   | 427585  | 373  | 34  | 313636  | 102884  | 0 | 0 | 0 | 0 | 50 | 60  | 17573228 | 1 | 1 |
| LYRM2   | 394472  | 603  | 35  | 234248  | 61588   | 0 | 0 | 0 | 0 | 50 | 48  | 22834552 | 1 | 1 |
| LYRM5   | 260142  | 633  | 19  | 243504  | 56604   | 0 | 0 | 0 | 0 | 48 | 40  | 16567528 | 1 | 1 |
| LYRM7   | 312101  | 294  | 34  | 286936  | 68708   | 0 | 0 | 0 | 0 | 50 | 45  | 18246424 | 1 | 1 |
| LYZL4   | 342219  | 527  | 19  | 387328  | 100748  | 0 | 0 | 0 | 0 | 50 | 67  | 22278836 | 1 | 1 |
| M6PR    | 299430  | 416  | 11  | 719476  | 195800  | 0 | 0 | 0 | 0 | 50 | 48  | 22394892 | 1 | 1 |
| MACROD1 | 1324858 | 278  | 53  | 834820  | 252404  | 0 | 0 | 0 | 0 | 26 | 28  | 8291596  | 1 | 1 |
| MAFA    | 2154403 | 237  | 32  | 854044  | 280172  | 0 | 0 | 1 | 0 | 50 | 62  | 21812476 | 1 | 1 |
| MAFF    | 1604692 | 184  | 68  | 398364  | 138840  | 0 | 0 | 1 | 0 | 30 | 52  | 11756544 | 1 | 1 |
| MAFG    | 3798594 | 211  | 19  | 397652  | 133144  | 0 | 0 | 0 | 0 | 34 | 28  | 11428668 | 1 | 1 |
| MAGEA2  | NaN     | NaN  | NaN | 1561416 | 465648  | 0 | 0 | 0 | 0 | 50 | 116 | 40111232 | 1 | 1 |
| MAGEA2E | 202421  | NaN  | -2  | 1561416 | 465648  | 0 | 0 | 0 | 0 | 4  | 2   | 2027420  | 1 | 1 |
| MAGEA5  | 117300  | NaN  | -16 | 305448  | 99324   | 0 | 0 | 0 | 0 | 50 | 63  | 19912860 | 1 | 1 |
| MAGEA9  | NaN     | NaN  | NaN | 1595592 | 437880  | 0 | 0 | 0 | 0 | 50 | 116 | 40083464 | 1 | 1 |
| MAGEA9E | 224617  | NaN  | 8   | 1595592 | 437880  | 0 | 0 | 0 | 0 | 50 | 75  | 25320500 | 1 | 1 |
| MAGEB3  | 74310   | NaN  | 16  | 879676  | 236384  | 0 | 0 | 0 | 0 | 50 | 67  | 20445436 | 1 | 1 |
| MAGED4  | NaN     | NaN  | NaN | 3754376 | 1096480 | 0 | 0 | 0 | 0 | 0  | 0   | 1096480  | 1 | 1 |
| MAGED4E | NaN     | NaN  | NaN | 3776448 | 1100040 | 0 | 0 | 0 | 0 | 0  | 0   | 1100040  | 1 | 1 |
| MAL2    | 247332  | 442  | -1  | 441084  | 142044  | 0 | 0 | 0 | 0 | 50 | 50  | 21146400 | 1 | 1 |
| MANF    | 538437  | 536  | 39  | 480600  | 130296  | 0 | 0 | 2 | 0 | 5  | 8   | 2237460  | 1 | 1 |
| MAP1D   | 537616  | 126  | 34  | 882168  | 234960  | 0 | 0 | 0 | 0 | 50 | 50  | 18405556 | 1 | 1 |
| MAP6D1  | 1441187 | 410  | 25  | 483092  | 168388  | 0 | 0 | 0 | 0 | 50 | 75  | 18513780 | 1 | 1 |
| MAPK1   | 458136  | 299  | 47  | 945536  | 245284  | 0 | 0 | 2 | 0 | 50 | 43  | 19892924 | 1 | 1 |
| MAPKSP1 | 203900  | 633  | 28  | 338912  | 87220   | 0 | 0 | 0 | 0 | 50 | 48  | 18832756 | 1 | 1 |
| 1-Mar   | 56946   | 1136 | -17 | 844076  | 227128  | 0 | 0 | 0 | 0 | 50 | 61  | 21100120 | 1 | 1 |
| 10-Mar  | 200669  | 205  | -17 | 2082244 | 552512  | 0 | 0 | 0 | 0 | 0  | 0   | 552512   | 1 | 1 |
| 11-Mar  | 160001  | 888  | -24 | 999292  | 304736  | 0 | 0 | 0 | 0 | 28 | 45  | 11180536 | 1 | 1 |
| 2-Mar   | 726556  | 150  | 0   | 613388  | 195088  | 0 | 0 | 0 | 0 | 50 | 51  | 19031048 | 1 | 1 |
| 3-Mar   | 298349  | 603  | 27  | 637240  | 193664  | 0 | 0 | 0 | 0 | 50 | 59  | 25326908 | 1 | 1 |
| 4-Mar   | 590758  | 342  | 27  | 1024924 | 304736  | 0 | 0 | 0 | 0 | 18 | 17  | 7206508  | 1 | 1 |
| 5-Mar   | 429135  | 317  | 31  | 718052  | 197224  | 0 | 0 | 0 | 0 | 50 | 34  | 17182340 | 1 | 1 |

|        |         |     |     |         |        |   |   |   |   |    |     |          |   |   |
|--------|---------|-----|-----|---------|--------|---|---|---|---|----|-----|----------|---|---|
| 6-Mar  | 627256  | 164 | 17  | 2360636 | 665008 | 0 | 0 | 0 | 0 | 13 | 7   | 4966200  | 1 | 1 |
| 7-Mar  | 363925  | 374 | 28  | 1796732 | 500536 | 0 | 0 | 0 | 0 | 36 | 19  | 16653324 | 1 | 1 |
| 8-Mar  | 128745  | 725 | 34  | 768960  | 192240 | 0 | 0 | 0 | 0 | 50 | 64  | 21685740 | 1 | 1 |
| 9-Mar  | 1160849 | 344 | 39  | 845856  | 278748 | 0 | 0 | 0 | 0 | 50 | 87  | 20175588 | 1 | 1 |
| ARCKSL | 1478512 | 210 | 42  | 485584  | 146672 | 0 | 0 | 2 | 0 | 0  | 2   | 146672   | 1 | 1 |
| ARVELD | NaN     | NaN | NaN | 411180  | 146316 | 0 | 0 | 0 | 0 | 50 | 116 | 39791900 | 1 | 1 |
| MAX    | 501431  | 387 | 39  | 719476  | 174440 | 0 | 0 | 0 | 0 | 50 | 76  | 23893652 | 1 | 1 |
| MBD3L1 | 560313  | 537 | -60 | 489856  | 139196 | 0 | 0 | 0 | 0 | 50 | 122 | 29063128 | 1 | 1 |
| MBD3L2 | NaN     | NaN | NaN | 510148  | 165896 | 0 | 0 | 0 | 0 | 50 | 116 | 39811480 | 1 | 1 |
| MBD3L3 | NaN     | NaN | NaN | 512640  | 163404 | 0 | 0 | 0 | 0 | 50 | 116 | 39808988 | 1 | 1 |
| MBD3L4 | NaN     | NaN | NaN | 512284  | 163760 | 0 | 0 | 0 | 0 | 50 | 116 | 39809344 | 1 | 1 |
| MBD3L5 | NaN     | NaN | NaN | 511216  | 164828 | 0 | 0 | 0 | 0 | 50 | 116 | 39810412 | 1 | 1 |
| MBLAC2 | 83822   | 824 | 25  | 688148  | 213244 | 0 | 0 | 2 | 0 | 8  | 13  | 3461388  | 1 | 1 |
| MBOAT4 | NaN     | NaN | NaN | 1086512 | 321112 | 0 | 0 | 0 | 0 | 50 | 116 | 39966696 | 1 | 1 |
| MC2R   | 133238  | 815 | -2  | 736920  | 217872 | 0 | 0 | 1 | 0 | 16 | 18  | 5864744  | 1 | 1 |
| MCART1 | 485791  | 524 | 28  | 743328  | 217872 | 0 | 0 | 0 | 0 | 15 | 19  | 6871868  | 1 | 1 |
| MCART2 | 415934  | 554 | 29  | 736564  | 220364 | 0 | 0 | 0 | 0 | 50 | 60  | 22710308 | 1 | 1 |
| MCART6 | 357831  | NaN | 45  | 751516  | 239588 | 0 | 0 | 0 | 0 | 50 | 50  | 20582852 | 1 | 1 |
| MCAT   | 624112  | 241 | 48  | 973304  | 294412 | 0 | 0 | 1 | 0 | 50 | 66  | 22537648 | 1 | 1 |
| MCFD2  | 809702  | 242 | 33  | 548596  | 133856 | 0 | 0 | 0 | 0 | 50 | 57  | 18549380 | 1 | 1 |
| MCOLN2 | 373596  | 649 | -5  | 1503744 | 368460 | 0 | 0 | 0 | 0 | 22 | 24  | 6973328  | 1 | 1 |
| MDFI   | 486789  | 331 | 52  | 625848  | 186900 | 0 | 0 | 2 | 0 | 0  | 2   | 186900   | 1 | 1 |
| MDH2   | 1072825 | 218 | 49  | 858316  | 264152 | 0 | 0 | 0 | 0 | 50 | 64  | 21496704 | 1 | 1 |
| MEAF6  | 446254  | 357 | 25  | 545748  | 133500 | 0 | 0 | 0 | 0 | 50 | 40  | 16603128 | 1 | 1 |
| MED10  | 253175  | 763 | -12 | 364188  | 86508  | 0 | 0 | 1 | 0 | 23 | 24  | 8536168  | 1 | 1 |
| MED18  | 754355  | 170 | 25  | 535780  | 142400 | 0 | 0 | 0 | 0 | 50 | 68  | 26747348 | 1 | 1 |
| MED22  | 1827885 | 416 | 28  | 517268  | 152368 | 0 | 0 | 2 | 0 | 0  | 2   | 152368   | 1 | 1 |
| MED30  | 139000  | 574 | 0   | 460664  | 125668 | 0 | 0 | 1 | 0 | 0  | 1   | 125668   | 1 | 1 |
| MED31  | 663953  | 424 | 9   | 355644  | 80100  | 0 | 0 | 0 | 0 | 50 | 52  | 18304452 | 1 | 1 |
| MESDC1 | 265620  | 516 | -2  | 856892  | 306160 | 0 | 0 | 0 | 0 | 16 | 17  | 7192980  | 1 | 1 |
| MESPI  | 880974  | 190 | 35  | 634748  | 233536 | 0 | 0 | 0 | 0 | 50 | 61  | 22286312 | 1 | 1 |
| METRNL | 1207790 | 194 | 33  | 704524  | 252404 | 0 | 0 | 1 | 0 | 50 | 77  | 22508812 | 1 | 1 |
| METRNL | 222738  | 483 | 14  | 762196  | 250268 | 0 | 0 | 1 | 0 | 50 | 34  | 17488856 | 1 | 1 |

|           |         |     |     |          |         |   |   |   |   |    |     |          |   |   |
|-----------|---------|-----|-----|----------|---------|---|---|---|---|----|-----|----------|---|---|
| METT10D   | 678213  | 167 | 19  | 1448208  | 391956  | 0 | 0 | 0 | 0 | 50 | 49  | 22829212 | 1 | 1 |
| METT11D1  | 1005555 | 429 | 4   | 1261308  | 332148  | 0 | 0 | 0 | 0 | 30 | 29  | 8819900  | 1 | 1 |
| METT5D1   | 271729  | 616 | -14 | 1085800  | 296192  | 0 | 0 | 0 | 0 | 22 | 15  | 7104336  | 1 | 1 |
| METTTL1   | 1160849 | 344 | 39  | 749736   | 161268  | 0 | 0 | 0 | 0 | 50 | 87  | 20175588 | 1 | 1 |
| METTTL10  | 294304  | 352 | 42  | 750804   | 213600  | 0 | 0 | 0 | 0 | 50 | 57  | 18328304 | 1 | 1 |
| METTTL11A | 886775  | 205 | 39  | 574228   | 156284  | 0 | 0 | 0 | 0 | 50 | 69  | 20923544 | 1 | 1 |
| METTTL11E | NaN     | NaN | NaN | 737988   | 189036  | 0 | 0 | 0 | 0 | 50 | 116 | 39834620 | 1 | 1 |
| METTTL7B  | 1678592 | 523 | -8  | 609116   | 180136  | 0 | 0 | 2 | 0 | 7  | 8   | 2744404  | 1 | 1 |
| METTTL9   | 479469  | 466 | 40  | 819156   | 220008  | 0 | 0 | 2 | 0 | 29 | 41  | 12985100 | 1 | 1 |
| MFAP4     | 630769  | 332 | 11  | 663584   | 180136  | 0 | 0 | 0 | 0 | 50 | 72  | 28508124 | 1 | 1 |
| MFNG      | 979927  | 179 | 51  | 817732   | 251336  | 0 | 0 | 0 | 0 | 50 | 67  | 19634824 | 1 | 1 |
| MGC26647  | NaN     | NaN | NaN | 639732   | 176220  | 0 | 0 | 0 | 0 | 50 | 116 | 39821804 | 1 | 1 |
| MGC29506  | 832127  | 177 | 48  | 474548   | 149164  | 0 | 0 | 0 | 0 | 50 | 77  | 20769396 | 1 | 1 |
| MGC42105  | 505867  | 537 | 26  | 1100752  | 307940  | 0 | 0 | 0 | 0 | 2  | 0   | 428624   | 1 | 1 |
| MGC70857  | 1755818 | 291 | 7   | 520828   | 182984  | 0 | 0 | 0 | 0 | 24 | 29  | 10834860 | 1 | 1 |
| MGC87042  | NaN     | NaN | NaN | 913140   | 242436  | 0 | 0 | 0 | 0 | 50 | 116 | 39888020 | 1 | 1 |
| MGP       | 341752  | 426 | 8   | 279104   | 67996   | 0 | 0 | 0 | 0 | 50 | 50  | 19251768 | 1 | 1 |
| MGST2     | 382197  | 256 | 12  | 383768   | 109648  | 0 | 0 | 0 | 0 | 50 | 70  | 26196616 | 1 | 1 |
| MICB      | 2514366 | 220 | 34  | 973304   | 278392  | 0 | 0 | 2 | 0 | 16 | 15  | 4268440  | 1 | 1 |
| MID1IP1   | 91133   | NaN | 31  | 458528   | 131008  | 0 | 0 | 0 | 0 | 50 | 54  | 22551532 | 1 | 1 |
| MIIP      | 518052  | 207 | 39  | 973660   | 311144  | 0 | 0 | 2 | 0 | 42 | 44  | 13163456 | 1 | 1 |
| MIOX      | 1075525 | 207 | 42  | 758992   | 195800  | 0 | 0 | 2 | 0 | 11 | 15  | 4417248  | 1 | 1 |
| MKI67IP   | 225849  | 358 | 31  | 766112   | 203632  | 0 | 0 | 0 | 0 | 50 | 45  | 19401288 | 1 | 1 |
| MLANA     | 337967  | 183 | 27  | 312212   | 86152   | 0 | 0 | 0 | 0 | 50 | 62  | 26807156 | 1 | 1 |
| MLF1IP    | 299322  | 515 | 32  | 1118552  | 277324  | 0 | 0 | 0 | 0 | 50 | 69  | 23222592 | 1 | 1 |
| MLF2      | 2816186 | 232 | 48  | 651480   | 180492  | 0 | 0 | 0 | 0 | 6  | 24  | 6345344  | 1 | 1 |
| MLL       | 1338034 | 192 | 49  | 9940944  | 2930592 | 0 | 0 | 0 | 0 | 1  | 0   | 3080468  | 1 | 1 |
| MLL2      | 1770671 | 214 | 65  | 13597420 | 4372748 | 0 | 0 | 0 | 0 | 0  | 0   | 4372748  | 1 | 1 |
| MLL3      | 261375  | 616 | 16  | 12498804 | 3487020 | 0 | 0 | 0 | 0 | 0  | 0   | 3487020  | 1 | 1 |
| MLL4      | 1151198 | 321 | 30  | 6654708  | 2201148 | 0 | 0 | 0 | 0 | 0  | 0   | 2201148  | 1 | 1 |
| MLL5      | 443176  | 381 | 40  | 4728748  | 1334288 | 0 | 0 | 0 | 0 | 3  | 2   | 2219660  | 1 | 1 |
| MLLT11    | 1614665 | 165 | 40  | 232824   | 63012   | 0 | 0 | 0 | 0 | 50 | 62  | 20369964 | 1 | 1 |
| MMD       | 147492  | 526 | -59 | 629408   | 161980  | 0 | 0 | 0 | 0 | 50 | 86  | 18568604 | 1 | 1 |

|          |         |      |     |         |         |   |   |   |   |    |     |          |   |   |
|----------|---------|------|-----|---------|---------|---|---|---|---|----|-----|----------|---|---|
| MMGT1    | 253719  | NaN  | 20  | 333572  | 102172  | 0 | 0 | 0 | 0 | 24 | 22  | 9536172  | 1 | 1 |
| MMP23B   | NaN     | NaN  | NaN | 971524  | 315416  | 0 | 0 | 0 | 0 | 50 | 116 | 39961000 | 1 | 1 |
| MMP26    | 97256   | 1024 | -11 | 689928  | 173016  | 0 | 0 | 1 | 0 | 15 | 18  | 5687456  | 1 | 1 |
| MND1     | 202295  | 238  | 27  | 568176  | 123888  | 0 | 0 | 0 | 0 | 50 | 38  | 18733788 | 1 | 1 |
| MNS1     | 211810  | 681  | 12  | 1354936 | 272696  | 0 | 0 | 0 | 0 | 50 | 71  | 18983344 | 1 | 1 |
| MNT      | 752972  | 271  | 28  | 1401928 | 487364  | 0 | 0 | 0 | 0 | 18 | 26  | 10374552 | 1 | 1 |
| MOBKL1A  | 265400  | 638  | 25  | 579568  | 137060  | 0 | 0 | 0 | 0 | 50 | 48  | 20795028 | 1 | 1 |
| MOBKL1E  | 1025255 | 172  | 44  | 578856  | 137772  | 0 | 0 | 0 | 0 | 43 | 61  | 23133236 | 1 | 1 |
| MOBKL2A  | 1853815 | 239  | 37  | 556784  | 150232  | 0 | 0 | 0 | 0 | 50 | 68  | 23613124 | 1 | 1 |
| MOBKL2E  | 117319  | 434  | -22 | 561412  | 142400  | 0 | 0 | 0 | 0 | 50 | 64  | 21389904 | 1 | 1 |
| MOBKL2C  | 608423  | 266  | 25  | 688860  | 187968  | 0 | 0 | 0 | 0 | 50 | 58  | 19047424 | 1 | 1 |
| MOBKL3   | 667169  | 428  | 25  | 611964  | 144180  | 0 | 0 | 0 | 0 | 50 | 72  | 22561500 | 1 | 1 |
| MOCS2    | 204924  | 419  | -5  | 682808  | 150232  | 0 | 0 | 0 | 0 | 50 | 36  | 19447212 | 1 | 1 |
| MOG      | 484408  | 755  | 34  | 784624  | 220364  | 0 | 0 | 0 | 0 | 50 | 51  | 18249272 | 1 | 1 |
| MORF4    | 260919  | 785  | -29 | 593096  | 161980  | 0 | 0 | 0 | 0 | 50 | 79  | 21017884 | 1 | 1 |
| MORF4L2  | 485629  | NaN  | 43  | 727664  | 202564  | 0 | 0 | 2 | 0 | 13 | 6   | 3222868  | 1 | 1 |
| MORN2    | NaN     | NaN  | NaN | 211820  | 50908   | 0 | 0 | 0 | 0 | 50 | 116 | 39696492 | 1 | 1 |
| MORN4    | 564805  | 169  | 40  | 383768  | 104308  | 0 | 0 | 0 | 0 | 50 | 62  | 20233616 | 1 | 1 |
| MORN5    | 220092  | 528  | 30  | 438948  | 99324   | 0 | 0 | 1 | 0 | 6  | 10  | 3510872  | 1 | 1 |
| MOSC1    | 319790  | 564  | -2  | 840872  | 267712  | 0 | 0 | 0 | 0 | 14 | 10  | 3606636  | 1 | 1 |
| MOSC2    | 319790  | 564  | -2  | 859028  | 247420  | 0 | 0 | 0 | 0 | 14 | 10  | 3606636  | 1 | 1 |
| MOSPD1   | 296514  | NaN  | 17  | 555004  | 150944  | 0 | 0 | 0 | 0 | 50 | 45  | 22514152 | 1 | 1 |
| MOSPD3   | 1884430 | 247  | 60  | 577432  | 200072  | 0 | 0 | 1 | 0 | 22 | 30  | 9880780  | 1 | 1 |
| MPST     | 699535  | 379  | 44  | 783912  | 247776  | 0 | 0 | 1 | 0 | 50 | 63  | 26596760 | 1 | 1 |
| MPV17    | 1245306 | 182  | 52  | 461376  | 135636  | 0 | 0 | 0 | 0 | 50 | 41  | 22639464 | 1 | 1 |
| MPV17L   | 545296  | 212  | 36  | 523320  | 120684  | 0 | 0 | 0 | 0 | 50 | 58  | 20390968 | 1 | 1 |
| MRC1L1   | 75804   | 350  | -2  | 7734812 | 1851556 | 0 | 0 | 0 | 0 | 0  | 0   | 1851556  | 1 | 1 |
| MRFAP1L1 | 501020  | 201  | 62  | 328232  | 86152   | 0 | 0 | 2 | 0 | 1  | 2   | 257032   | 1 | 1 |
| MRGPRG   | NaN     | NaN  | NaN | 673552  | 253472  | 0 | 0 | 0 | 0 | 50 | 116 | 39899056 | 1 | 1 |
| MRGPRX4  | 631291  | 436  | 20  | 780708  | 256320  | 0 | 0 | 1 | 0 | 50 | 76  | 24807148 | 1 | 1 |
| MRO      | 240974  | 355  | 12  | 778572  | 201852  | 0 | 0 | 0 | 0 | 50 | 73  | 21837752 | 1 | 1 |
| MRP63    | 447305  | 240  | 43  | 259168  | 75116   | 0 | 0 | 0 | 0 | 50 | 47  | 18943116 | 1 | 1 |
| MRPL12   | 3745109 | 205  | 30  | 499468  | 155216  | 0 | 0 | 0 | 0 | 33 | 25  | 10695308 | 1 | 1 |



|        |         |     |     |         |        |   |   |   |   |    |     |          |   |   |
|--------|---------|-----|-----|---------|--------|---|---|---|---|----|-----|----------|---|---|
| MRPL14 | 1358424 | 203 | 53  | 365968  | 110360 | 0 | 0 | 1 | 0 | 34 | 28  | 11204032 | 1 | 1 |
| MRPL23 | 827096  | 481 | 53  | 401568  | 111072 | 0 | 0 | 0 | 0 | 50 | 76  | 25042464 | 1 | 1 |
| MRPL36 | 394241  | 608 | 6   | 253116  | 84372  | 0 | 0 | 0 | 0 | 50 | 75  | 20915000 | 1 | 1 |
| MRPL4  | 1729517 | 200 | 31  | 831260  | 257032 | 0 | 0 | 2 | 0 | 29 | 50  | 11342516 | 1 | 1 |
| MRPL42 | 380369  | 364 | 15  | 420080  | 88288  | 0 | 0 | 0 | 0 | 50 | 68  | 27055288 | 1 | 1 |
| MRPL45 | 1101194 | 504 | 10  | 745108  | 195800 | 0 | 0 | 0 | 0 | 50 | 61  | 15954140 | 1 | 1 |
| MRPL46 | 212296  | 630 | 4   | 708084  | 206124 | 0 | 0 | 0 | 0 | 50 | 56  | 21422656 | 1 | 1 |
| MRPL48 | 553005  | 214 | 42  | 568532  | 145960 | 0 | 0 | 0 | 0 | 50 | 46  | 18683948 | 1 | 1 |
| MRPL49 | 3267059 | 207 | 46  | 422572  | 127448 | 0 | 0 | 0 | 0 | 50 | 74  | 20482816 | 1 | 1 |
| MRPL52 | 1165302 | 225 | 35  | 353508  | 67284  | 0 | 0 | 1 | 0 | 5  | 12  | 2536144  | 1 | 1 |
| MRPS11 | 212296  | 630 | 4   | 495196  | 150944 | 0 | 0 | 0 | 0 | 50 | 56  | 21422656 | 1 | 1 |
| MRPS12 | 1794625 | 282 | 21  | 339624  | 114276 | 0 | 0 | 1 | 0 | 11 | 10  | 3517992  | 1 | 1 |
| MRPS16 | 829738  | 249 | 44  | 346744  | 103952 | 0 | 0 | 1 | 0 | 1  | 2   | 281240   | 1 | 1 |
| MRPS25 | 532551  | 395 | 45  | 456036  | 114276 | 0 | 0 | 0 | 0 | 50 | 63  | 21310516 | 1 | 1 |
| MRPS33 | 354283  | 679 | 10  | 279104  | 72268  | 0 | 0 | 0 | 0 | 50 | 66  | 23073784 | 1 | 1 |
| MRRF   | 319049  | 597 | 19  | 695624  | 172660 | 0 | 0 | 1 | 0 | 26 | 20  | 10394132 | 1 | 1 |
| MS4A15 | 744779  | 621 | 23  | 610896  | 186900 | 0 | 0 | 0 | 0 | 50 | 74  | 23297708 | 1 | 1 |
| MS4A8B | 559288  | 756 | 16  | 635816  | 192952 | 0 | 0 | 0 | 0 | 50 | 40  | 17570024 | 1 | 1 |
| MSI1   | 1597755 | 182 | 50  | 961200  | 263796 | 0 | 0 | 0 | 0 | 4  | 10  | 2645080  | 1 | 1 |
| MSL3L2 | NaN     | NaN | NaN | 889644  | 254184 | 0 | 0 | 0 | 0 | 50 | 116 | 39899768 | 1 | 1 |
| MSMB   | 406207  | 579 | 41  | 335352  | 48060  | 0 | 0 | 0 | 0 | 50 | 76  | 22964848 | 1 | 1 |
| MST4   | 151066  | NaN | 32  | 1098972 | 281952 | 0 | 0 | 0 | 0 | 14 | 15  | 5940216  | 1 | 1 |
| MT1B   | 653985  | 187 | 28  | 171948  | 37380  | 0 | 0 | 0 | 0 | 50 | 41  | 16409108 | 1 | 1 |
| MT1E   | 653985  | 187 | 28  | 170524  | 36668  | 0 | 0 | 0 | 0 | 50 | 41  | 16409108 | 1 | 1 |
| MT1F   | 653985  | 187 | 28  | 171948  | 35244  | 0 | 0 | 0 | 0 | 50 | 41  | 16409108 | 1 | 1 |
| MT1G   | 661565  | 143 | 26  | 173728  | 35600  | 0 | 0 | 0 | 0 | 50 | 43  | 20327956 | 1 | 1 |
| MT1M   | 653985  | 187 | 28  | 170168  | 37024  | 0 | 0 | 0 | 0 | 50 | 41  | 16409108 | 1 | 1 |
| MT1X   | 661565  | 143 | 26  | 173016  | 36312  | 0 | 0 | 0 | 0 | 50 | 43  | 20327956 | 1 | 1 |
| MT2A   | 653985  | 187 | 28  | 173728  | 35600  | 0 | 0 | 0 | 0 | 50 | 41  | 16409108 | 1 | 1 |
| MT3    | 653985  | 187 | 28  | 190460  | 39160  | 0 | 0 | 0 | 0 | 50 | 41  | 16409108 | 1 | 1 |
| MT4    | 598942  | 187 | 24  | 180136  | 34532  | 0 | 0 | 0 | 0 | 43 | 58  | 19598156 | 1 | 1 |
| MTAP   | 223932  | 357 | -28 | 738700  | 201140 | 0 | 0 | 0 | 0 | 50 | 86  | 24121136 | 1 | 1 |
| MTCP1  | NaN     | NaN | NaN | 292988  | 74404  | 0 | 0 | 1 | 0 | 8  | 17  | 4000372  | 1 | 1 |

|         |         |     |     |          |         |   |   |   |   |    |     |          |   |   |
|---------|---------|-----|-----|----------|---------|---|---|---|---|----|-----|----------|---|---|
| MTCP1NB | 985719  | NaN | 6   | 187968   | 41652   | 0 | 0 | 0 | 0 | 50 | 40  | 15864784 | 1 | 1 |
| MTERF   | 512495  | 617 | -7  | 1017448  | 272696  | 0 | 0 | 0 | 0 | 17 | 27  | 7871516  | 1 | 1 |
| MTERFD1 | 217849  | 671 | 12  | 1086156  | 285156  | 0 | 0 | 0 | 0 | 50 | 75  | 24887960 | 1 | 1 |
| MTERFD2 | 1394664 | 278 | 35  | 983272   | 255608  | 0 | 0 | 0 | 0 | 50 | 94  | 24308036 | 1 | 1 |
| MTERFD3 | 156112  | 473 | 21  | 979000   | 262016  | 0 | 0 | 0 | 0 | 50 | 46  | 19326884 | 1 | 1 |
| MTG1    | 485067  | 472 | 8   | 866504   | 249556  | 0 | 0 | 0 | 0 | 27 | 41  | 12590296 | 1 | 1 |
| MTMR15  | 280093  | 591 | 19  | 2627992  | 713780  | 0 | 0 | 0 | 0 | 14 | 7   | 5907464  | 1 | 1 |
| MTP18   | 657636  | 288 | 48  | 543612   | 153792  | 0 | 0 | 0 | 0 | 50 | 58  | 19652624 | 1 | 1 |
| MTPN    | 387359  | 588 | -9  | 307228   | 86864   | 0 | 0 | 1 | 0 | 50 | 43  | 13940604 | 1 | 1 |
| MUC12   | NaN     | NaN | NaN | 12680720 | 4462816 | 0 | 0 | 0 | 0 | 0  | 0   | 4462816  | 1 | 1 |
| MUC2    | 1467711 | 466 | 43  | 7097216  | 2130304 | 0 | 0 | 0 | 0 | 1  | 4   | 4092576  | 1 | 1 |
| MUDENG  | 167619  | 944 | 19  | 1259172  | 343896  | 0 | 0 | 0 | 0 | 27 | 15  | 9596692  | 1 | 1 |
| MUL1    | 573203  | 429 | 30  | 880744   | 263084  | 0 | 0 | 2 | 0 | 17 | 21  | 6692444  | 1 | 1 |
| MUSTN1  | 1193949 | 272 | 49  | 213244   | 61232   | 0 | 0 | 0 | 0 | 50 | 63  | 22512372 | 1 | 1 |
| MUTED   | 578469  | 368 | 13  | 502316   | 119260  | 0 | 0 | 0 | 0 | 50 | 69  | 20657612 | 1 | 1 |
| MVK     | 442710  | 465 | 38  | 1006412  | 312568  | 0 | 0 | 1 | 0 | 50 | 62  | 19254616 | 1 | 1 |
| MXD3    | 942017  | 227 | 53  | 593096   | 178000  | 0 | 0 | 0 | 0 | 50 | 65  | 19830268 | 1 | 1 |
| MXI1    | 403252  | 359 | 12  | 822004   | 227840  | 0 | 0 | 0 | 0 | 6  | 11  | 4844092  | 1 | 1 |
| MYADML  | NaN     | NaN | NaN | 728376   | 260592  | 0 | 0 | 0 | 0 | 50 | 116 | 39906176 | 1 | 1 |
| MYCBP   | 524940  | 458 | 24  | 283732   | 68708   | 0 | 0 | 0 | 0 | 50 | 45  | 18683236 | 1 | 1 |
| MYCL1   | 996021  | 270 | 31  | 1076544  | 328944  | 0 | 0 | 0 | 0 | 26 | 31  | 10740876 | 1 | 1 |
| MYEOV2  | 340416  | 482 | 28  | 645072   | 184764  | 0 | 0 | 0 | 0 | 50 | 52  | 22426576 | 1 | 1 |
| MYL1    | 186926  | 511 | 3   | 550376   | 138484  | 0 | 0 | 0 | 0 | 50 | 49  | 20830628 | 1 | 1 |
| MYL3    | 427952  | 376 | 40  | 524032   | 131720  | 0 | 0 | 0 | 0 | 50 | 63  | 25265676 | 1 | 1 |
| MYL4    | 960078  | 160 | 22  | 526880   | 139552  | 0 | 0 | 1 | 0 | 50 | 82  | 21390260 | 1 | 1 |
| MYL7    | 1151124 | 282 | 56  | 477040   | 116768  | 0 | 0 | 1 | 0 | 4  | 8   | 1887868  | 1 | 1 |
| MYL9    | 858383  | 190 | 46  | 458884   | 108224  | 0 | 0 | 1 | 0 | 25 | 34  | 12171996 | 1 | 1 |
| MYOD1   | 391398  | 626 | 17  | 782844   | 254184  | 0 | 0 | 1 | 0 | 50 | 41  | 18571096 | 1 | 1 |
| MYST1   | 1296884 | 351 | 35  | 1266648  | 344964  | 0 | 0 | 0 | 0 | 16 | 27  | 8122140  | 1 | 1 |
| MYST2   | 1129239 | 238 | 27  | 1604492  | 416164  | 0 | 0 | 0 | 0 | 50 | 64  | 21704608 | 1 | 1 |
| MYST3   | 608794  | 464 | 31  | 5134944  | 1353156 | 0 | 0 | 0 | 0 | 2  | 1   | 1827348  | 1 | 1 |
| MYST4   | 246599  | 335 | 42  | 5309028  | 1400148 | 0 | 0 | 0 | 0 | 0  | 0   | 1400148  | 1 | 1 |
| NAA11   | 103025  | 821 | -5  | 586688   | 154504  | 0 | 0 | 3 | 0 | 4  | 9   | 1143828  | 1 | 1 |

|         |         |      |     |         |         |   |   |   |   |    |     |          |   |   |
|---------|---------|------|-----|---------|---------|---|---|---|---|----|-----|----------|---|---|
| NAA20   | 225789  | 502  | 12  | 494840  | 120328  | 0 | 0 | 0 | 0 | 50 | 57  | 21416248 | 1 | 1 |
| NACAD   | NaN     | NaN  | NaN | 3745476 | 1294416 | 0 | 0 | 0 | 0 | 0  | 0   | 1294416  | 1 | 1 |
| NACC2   | 809002  | 262  | 46  | 1444292 | 461020  | 0 | 0 | 1 | 0 | 50 | 59  | 19879040 | 1 | 1 |
| NANOS1  | 680734  | 411  | -1  | 686012  | 254896  | 0 | 0 | 0 | 0 | 50 | 41  | 17641580 | 1 | 1 |
| NANS    | 484638  | 272  | 48  | 922752  | 254184  | 0 | 0 | 2 | 0 | 50 | 49  | 20385272 | 1 | 1 |
| NAPRT1  | 2183482 | 235  | 37  | 1330728 | 451764  | 0 | 0 | 0 | 0 | 50 | 40  | 19636960 | 1 | 1 |
| NARG2   | 230111  | 266  | 23  | 2546468 | 667144  | 0 | 0 | 0 | 0 | 6  | 6   | 2565336  | 1 | 1 |
| NAT14   | NaN     | NaN  | NaN | 481312  | 190460  | 0 | 0 | 0 | 0 | 50 | 116 | 39836044 | 1 | 1 |
| NAT15   | 1083663 | 246  | 34  | 629764  | 170168  | 0 | 0 | 0 | 0 | 50 | 59  | 19712432 | 1 | 1 |
| NAT8B   | 978005  | 466  | 31  | 552868  | 179780  | 0 | 0 | 0 | 0 | 50 | 67  | 22206212 | 1 | 1 |
| NBL1    | 775439  | 271  | 32  | 552868  | 157352  | 0 | 0 | 0 | 0 | 50 | 62  | 21875844 | 1 | 1 |
| NBPF16  | NaN     | NaN  | NaN | 3563204 | 864724  | 0 | 0 | 0 | 0 | 7  | 14  | 4552884  | 1 | 1 |
| NBPF4   | NaN     | NaN  | NaN | 1669640 | 437524  | 0 | 0 | 0 | 0 | 50 | 116 | 40083108 | 1 | 1 |
| NBPF7   | 415110  | 581  | 26  | 1106092 | 274832  | 0 | 0 | 0 | 0 | 25 | 17  | 10230016 | 1 | 1 |
| NCBP2   | 754196  | 306  | 29  | 414028  | 103952  | 0 | 0 | 0 | 0 | 50 | 41  | 23872292 | 1 | 1 |
| NCCRP1  | 1652029 | 286  | 26  | 680316  | 227484  | 0 | 0 | 0 | 0 | 5  | 2   | 1706308  | 1 | 1 |
| NCF1    | 895858  | 125  | 49  | 1021008 | 276612  | 0 | 0 | 0 | 0 | 50 | 71  | 23498848 | 1 | 1 |
| NCR3    | 2517285 | 220  | 35  | 594520  | 194732  | 0 | 0 | 0 | 0 | 50 | 55  | 21824936 | 1 | 1 |
| NCS1    | 650366  | 231  | 30  | 531864  | 127092  | 0 | 0 | 2 | 0 | 1  | 2   | 381276   | 1 | 1 |
| NDFIP1  | 606399  | 371  | 40  | 584908  | 156284  | 0 | 0 | 0 | 0 | 50 | 63  | 21927464 | 1 | 1 |
| NDP     | 73234   | NaN  | 13  | 335352  | 98256   | 0 | 0 | 1 | 0 | 8  | 11  | 3906388  | 1 | 1 |
| NDUFA1  | 772178  | NaN  | 38  | 189392  | 48772   | 0 | 0 | 1 | 0 | 4  | 4   | 1150592  | 1 | 1 |
| NDUFA11 | 1192025 | 294  | 35  | 362052  | 107868  | 0 | 0 | 0 | 0 | 50 | 52  | 17132856 | 1 | 1 |
| NDUFA2  | 774470  | 356  | 31  | 276612  | 79032   | 0 | 0 | 0 | 0 | 50 | 59  | 20786128 | 1 | 1 |
| NDUFA3  | 735613  | 439  | -53 | 231756  | 57672   | 0 | 0 | 0 | 0 | 50 | 119 | 29395632 | 1 | 1 |
| NDUFA4  | 142078  | 1098 | -11 | 220008  | 55536   | 0 | 0 | 1 | 0 | 3  | 4   | 1014956  | 1 | 1 |
| NDUFA4L | 2162032 | 238  | 58  | 233180  | 61588   | 0 | 0 | 0 | 0 | 50 | 84  | 24087316 | 1 | 1 |
| NDUFAF4 | 123845  | 1308 | 1   | 455680  | 118904  | 0 | 0 | 1 | 0 | 7  | 3   | 2288368  | 1 | 1 |
| NDUFB1  | 356163  | 415  | 27  | 276968  | 75472   | 0 | 0 | 0 | 0 | 50 | 54  | 24970908 | 1 | 1 |
| NDUFB11 | 819569  | NaN  | 38  | 417588  | 120684  | 0 | 0 | 0 | 0 | 50 | 54  | 16576428 | 1 | 1 |
| NDUFB3  | 644877  | 205  | 39  | 263440  | 62300   | 0 | 0 | 0 | 0 | 50 | 62  | 23017892 | 1 | 1 |
| NDUFB7  | 1008795 | 204  | 26  | 358492  | 96476   | 0 | 0 | 0 | 0 | 50 | 74  | 20546896 | 1 | 1 |
| NDUFB8  | 1153157 | 264  | 50  | 496264  | 124244  | 0 | 0 | 1 | 0 | 18 | 20  | 7416192  | 1 | 1 |

|          |         |     |     |         |         |   |   |   |   |    |     |          |   |   |
|----------|---------|-----|-----|---------|---------|---|---|---|---|----|-----|----------|---|---|
| NDUFC1   | 387523  | 299 | 20  | 200428  | 59096   | 0 | 0 | 1 | 0 | 4  | 15  | 3530808  | 1 | 1 |
| NDUFC2   | 556958  | 209 | 38  | 305804  | 87220   | 0 | 0 | 0 | 0 | 50 | 53  | 19579288 | 1 | 1 |
| NDUFS3   | 989876  | 214 | 28  | 683876  | 197224  | 0 | 0 | 0 | 0 | 50 | 74  | 23251428 | 1 | 1 |
| NDUFS5   | 682309  | 208 | 26  | 281952  | 69420   | 0 | 0 | 0 | 0 | 50 | 58  | 23038184 | 1 | 1 |
| NDUFV3   | 441011  | 206 | 66  | 1173376 | 360272  | 0 | 0 | 1 | 0 | 4  | 4   | 2079396  | 1 | 1 |
| NELF     | 1591716 | 213 | 30  | 1395164 | 380920  | 0 | 0 | 0 | 0 | 20 | 24  | 9013920  | 1 | 1 |
| NENF     | 416515  | 283 | 18  | 427556  | 141688  | 0 | 0 | 1 | 0 | 50 | 60  | 19934576 | 1 | 1 |
| NEURL    | 532306  | 170 | 44  | 1401572 | 462088  | 0 | 0 | 0 | 0 | 19 | 18  | 7146344  | 1 | 1 |
| NEURL1B  | NaN     | NaN | NaN | 1328592 | 469920  | 0 | 0 | 0 | 0 | 50 | 116 | 40115504 | 1 | 1 |
| NEURL2   | 725555  | 209 | 59  | 685300  | 235316  | 0 | 0 | 0 | 0 | 27 | 40  | 9561092  | 1 | 1 |
| NEUROG1  | 496830  | 608 | 34  | 564972  | 197580  | 0 | 0 | 0 | 0 | 50 | 66  | 23468944 | 1 | 1 |
| NEUROG2  | 186926  | 647 | 22  | 649344  | 228552  | 0 | 0 | 0 | 0 | 50 | 50  | 20264944 | 1 | 1 |
| NFAM1    | 967833  | 185 | 53  | 679248  | 212532  | 0 | 0 | 0 | 0 | 50 | 62  | 18302672 | 1 | 1 |
| NFKBIL1  | 2517285 | 220 | 35  | 944112  | 292632  | 0 | 0 | 0 | 0 | 50 | 55  | 21824936 | 1 | 1 |
| NFKBIL2  | 2043455 | 200 | 36  | 3445012 | 1082240 | 0 | 0 | 0 | 0 | 0  | 0   | 1082240  | 1 | 1 |
| NGB      | 554839  | 418 | 37  | 382344  | 117480  | 0 | 0 | 0 | 0 | 50 | 65  | 23475708 | 1 | 1 |
| NHEDC1   | 357993  | 363 | 26  | 1527240 | 403704  | 0 | 0 | 0 | 0 | 50 | 46  | 23956664 | 1 | 1 |
| NHEDC2   | 350752  | 454 | 26  | 1361700 | 409044  | 0 | 0 | 0 | 0 | 14 | 15  | 7726268  | 1 | 1 |
| NHLH1    | 987855  | 526 | 28  | 316128  | 113208  | 0 | 0 | 0 | 0 | 50 | 69  | 19516276 | 1 | 1 |
| NHP2     | 821697  | 248 | 39  | 407620  | 98612   | 0 | 0 | 0 | 0 | 50 | 45  | 23405932 | 1 | 1 |
| NHP2L1   | 1475100 | 183 | 50  | 329656  | 97544   | 0 | 0 | 0 | 0 | 50 | 47  | 18945964 | 1 | 1 |
| NHSL1    | NaN     | NaN | NaN | 4115004 | 1281600 | 0 | 0 | 0 | 0 | 0  | 0   | 1281600  | 1 | 1 |
| NICN1    | 1585328 | 201 | 32  | 547172  | 161980  | 0 | 0 | 1 | 0 | 50 | 56  | 18997584 | 1 | 1 |
| NKX1-2   | NaN     | NaN | NaN | 733716  | 268068  | 0 | 0 | 0 | 0 | 50 | 116 | 39913652 | 1 | 1 |
| NKX2-3   | 278426  | 497 | 13  | 894628  | 279104  | 0 | 0 | 1 | 0 | 50 | 51  | 16901100 | 1 | 1 |
| NKX2-6   | NaN     | NaN | NaN | 524388  | 185832  | 0 | 0 | 0 | 0 | 50 | 116 | 39831416 | 1 | 1 |
| NKX3-1   | 378220  | 544 | 16  | 579212  | 180136  | 0 | 0 | 0 | 0 | 50 | 67  | 24898996 | 1 | 1 |
| NKX3-2   | 134006  | 592 | 24  | 799576  | 276968  | 0 | 0 | 1 | 0 | 50 | 51  | 20316920 | 1 | 1 |
| NKX6-1   | 95574   | 895 | -5  | 887508  | 304380  | 0 | 0 | 0 | 0 | 50 | 57  | 20885096 | 1 | 1 |
| NKX6-2   | 278505  | 581 | -12 | 676044  | 227484  | 0 | 0 | 0 | 0 | 50 | 37  | 17495620 | 1 | 1 |
| NMB      | 341389  | 197 | 42  | 391244  | 119260  | 0 | 0 | 1 | 0 | 50 | 48  | 19895416 | 1 | 1 |
| NME1-NME | 817798  | 267 | -4  | 696692  | 194020  | 0 | 0 | 0 | 0 | 50 | 65  | 20140344 | 1 | 1 |
| NME2     | 817798  | 267 | -4  | 400500  | 108936  | 0 | 0 | 0 | 0 | 50 | 65  | 20140344 | 1 | 1 |

|          |         |     |     |         |        |   |   |   |   |    |     |          |   |   |
|----------|---------|-----|-----|---------|--------|---|---|---|---|----|-----|----------|---|---|
| NMNAT1   | 744954  | 240 | 24  | 725884  | 188324 | 0 | 0 | 1 | 0 | 50 | 68  | 23004008 | 1 | 1 |
| NMS      | 226558  | 642 | 9   | 432540  | 103596 | 0 | 0 | 0 | 0 | 50 | 59  | 23206572 | 1 | 1 |
| NMUR1    | 1052303 | 216 | 43  | 1029908 | 346744 | 0 | 0 | 1 | 0 | 50 | 70  | 25384580 | 1 | 1 |
| NOTCH2N1 | NaN     | NaN | NaN | 617660  | 158776 | 0 | 0 | 0 | 0 | 50 | 116 | 39804360 | 1 | 1 |
| NOTO     | NaN     | NaN | NaN | 611252  | 204700 | 0 | 0 | 0 | 0 | 50 | 116 | 39850284 | 1 | 1 |
| NPAS1    | 1175364 | 207 | 35  | 1447140 | 489144 | 0 | 0 | 1 | 0 | 50 | 53  | 19463232 | 1 | 1 |
| NPBWR1   | 99395   | 697 | -19 | 774656  | 278392 | 0 | 0 | 5 | 0 | 1  | 6   | 458528   | 1 | 1 |
| NPIP     | 506128  | 214 | 23  | 904952  | 251692 | 0 | 0 | 0 | 0 | 24 | 25  | 10120012 | 1 | 1 |
| NPIPL3   | 499242  | 417 | 49  | 2735860 | 933788 | 0 | 0 | 0 | 0 | 9  | 9   | 6682476  | 1 | 1 |
| NPM1     | 300840  | 347 | 30  | 812748  | 186900 | 0 | 0 | 0 | 0 | 50 | 43  | 20088724 | 1 | 1 |
| NPPB     | 519155  | 207 | 43  | 333216  | 110004 | 0 | 0 | 0 | 0 | 50 | 49  | 18705664 | 1 | 1 |
| NPTN     | 310307  | 416 | 20  | 1026348 | 286224 | 0 | 0 | 2 | 0 | 15 | 18  | 8067672  | 1 | 1 |
| NPVF     | 254553  | 444 | 32  | 512284  | 129584 | 0 | 0 | 0 | 0 | 50 | 61  | 25227228 | 1 | 1 |
| NPW      | 1747301 | 183 | 46  | 380208  | 155928 | 0 | 0 | 0 | 0 | 50 | 75  | 19137492 | 1 | 1 |
| NQO1     | 1410481 | NaN | 39  | 715560  | 186900 | 0 | 0 | 0 | 0 | 50 | 80  | 29234008 | 1 | 1 |
| NR2E1    | 334933  | 436 | 35  | 987544  | 283376 | 0 | 0 | 2 | 0 | 50 | 52  | 19543688 | 1 | 1 |
| NR6A1    | 892645  | 345 | 29  | 1251696 | 327876 | 0 | 0 | 1 | 0 | 50 | 64  | 20722760 | 1 | 1 |
| NRGN     | 168652  | 622 | 14  | 199716  | 61944  | 0 | 0 | 0 | 0 | 50 | 50  | 19749100 | 1 | 1 |
| NRN1L    | 879834  | 158 | 50  | 404416  | 138128 | 0 | 0 | 0 | 0 | 50 | 85  | 23764780 | 1 | 1 |
| NSA2     | 418815  | 581 | 30  | 683520  | 176220 | 0 | 0 | 1 | 0 | 25 | 19  | 8118580  | 1 | 1 |
| NSL1     | 365714  | 364 | 26  | 824852  | 199360 | 0 | 0 | 1 | 0 | 2  | 1   | 796728   | 1 | 1 |
| NT5C     | 1511891 | 168 | 25  | 514064  | 152368 | 0 | 0 | 0 | 0 | 50 | 53  | 18659384 | 1 | 1 |
| NT5C3    | 376609  | 359 | 13  | 925956  | 234960 | 0 | 0 | 0 | 0 | 7  | 8   | 3892860  | 1 | 1 |
| NT5C3L   | 1760409 | 175 | 35  | 795660  | 205056 | 0 | 0 | 0 | 0 | 35 | 50  | 15900028 | 1 | 1 |
| NT5M     | 900505  | 220 | 15  | 578500  | 172304 | 0 | 0 | 0 | 0 | 50 | 63  | 22306960 | 1 | 1 |
| NTN3     | 2085452 | 321 | 49  | 1401572 | 483448 | 0 | 0 | 0 | 0 | 5  | 6   | 2042728  | 1 | 1 |
| NUCKS1   | 732566  | 281 | 35  | 656108  | 151300 | 0 | 0 | 0 | 0 | 50 | 68  | 23701056 | 1 | 1 |
| NUDCD3   | 1535714 | 363 | 52  | 928804  | 252404 | 0 | 0 | 1 | 0 | 50 | 96  | 25773332 | 1 | 1 |
| NUDT10   | 112254  | NaN | 3   | 417588  | 120684 | 0 | 0 | 0 | 0 | 50 | 81  | 25225804 | 1 | 1 |
| NUDT15   | 324467  | 567 | 34  | 422572  | 114632 | 0 | 0 | 0 | 0 | 50 | 44  | 21492432 | 1 | 1 |
| NUDT18   | 584373  | 219 | 34  | 787116  | 261660 | 0 | 0 | 0 | 0 | 50 | 59  | 21330096 | 1 | 1 |
| NUDT2    | 478815  | 302 | 38  | 381632  | 101104 | 0 | 0 | 0 | 0 | 50 | 40  | 17367460 | 1 | 1 |
| NUDT8    | 1374022 | 393 | 53  | 336776  | 125668 | 0 | 0 | 0 | 0 | 50 | 76  | 21858400 | 1 | 1 |

|         |         |     |     |         |         |   |   |   |   |    |     |          |   |   |
|---------|---------|-----|-----|---------|---------|---|---|---|---|----|-----|----------|---|---|
| NUMBL   | 918439  | 226 | 34  | 1504812 | 488076  | 0 | 0 | 2 | 0 | 50 | 67  | 19969464 | 1 | 1 |
| NUP62CL | 227679  | NaN | 32  | 492348  | 130296  | 0 | 0 | 1 | 0 | 16 | 22  | 5951964  | 1 | 1 |
| NUPR1   | 1133167 | 269 | 63  | 253472  | 78676   | 0 | 0 | 0 | 0 | 50 | 70  | 20905744 | 1 | 1 |
| NUTF2   | 959655  | 143 | 49  | 350660  | 76540   | 0 | 0 | 0 | 0 | 50 | 65  | 23996180 | 1 | 1 |
| NXF2    | NaN     | NaN | NaN | 3382000 | 815240  | 0 | 0 | 0 | 0 | 7  | 14  | 4503400  | 1 | 1 |
| NXF2B   | 95507   | NaN | 6   | 3382000 | 815240  | 0 | 0 | 0 | 0 | 1  | 0   | 1200788  | 1 | 1 |
| NXN     | 941400  | 376 | 15  | 1096124 | 332860  | 0 | 0 | 2 | 0 | 50 | 69  | 16529792 | 1 | 1 |
| NXT1    | 188823  | 688 | -22 | 358848  | 97188   | 0 | 0 | 0 | 0 | 50 | 91  | 27388860 | 1 | 1 |
| NXT2    | 133688  | NaN | 30  | 520828  | 132788  | 0 | 0 | 0 | 0 | 50 | 52  | 25221176 | 1 | 1 |
| OBFC1   | 529915  | 300 | 29  | 976152  | 244572  | 0 | 0 | 1 | 0 | 50 | 50  | 18714564 | 1 | 1 |
| OBFC2A  | 160466  | 461 | 20  | 538272  | 139908  | 0 | 0 | 0 | 0 | 50 | 42  | 18256036 | 1 | 1 |
| OBFC2B  | 2878071 | 171 | 46  | 546460  | 158420  | 0 | 0 | 0 | 0 | 33 | 67  | 18798224 | 1 | 1 |
| OC90    | 100916  | 999 | 6   | 1245644 | 341404  | 0 | 0 | 0 | 0 | 14 | 18  | 6873292  | 1 | 1 |
| OCLM    | 277882  | 399 | -14 | 115700  | 28480   | 0 | 0 | 0 | 0 | 50 | 30  | 18183768 | 1 | 1 |
| OCM     | 2208864 | 358 | 32  | 298328  | 69064   | 0 | 0 | 0 | 0 | 50 | 54  | 20921052 | 1 | 1 |
| OCM2    | 451365  | 522 | 25  | 296548  | 68708   | 0 | 0 | 1 | 0 | 17 | 31  | 6456060  | 1 | 1 |
| ODF3    | 1233553 | 437 | 17  | 647564  | 195088  | 0 | 0 | 0 | 0 | 50 | 63  | 18496336 | 1 | 1 |
| ODF3B   | 1075525 | 207 | 42  | 633324  | 208260  | 0 | 0 | 0 | 0 | 50 | 60  | 21418028 | 1 | 1 |
| ODZ1    | 121229  | NaN | -13 | 6973684 | 1917416 | 0 | 0 | 0 | 0 | 1  | 0   | 2235680  | 1 | 1 |
| ODZ2    | 71443   | 880 | -10 | 6993620 | 1988260 | 0 | 0 | 0 | 0 | 2  | 2   | 3277692  | 1 | 1 |
| ODZ3    | 144640  | 636 | -20 | 6835200 | 1928808 | 0 | 0 | 0 | 0 | 2  | 2   | 3870076  | 1 | 1 |
| ODZ4    | 78290   | 871 | 0   | 6989704 | 2013536 | 0 | 0 | 0 | 0 | 2  | 0   | 2381996  | 1 | 1 |
| OGFOD2  | 1093113 | 196 | 47  | 721256  | 232468  | 0 | 0 | 1 | 0 | 50 | 70  | 23094788 | 1 | 1 |
| OGFR    | 1044503 | 208 | 48  | 1681744 | 518336  | 0 | 0 | 1 | 0 | 38 | 49  | 16027832 | 1 | 1 |
| OLIG1   | 801943  | 554 | 66  | 624780  | 247776  | 0 | 0 | 0 | 0 | 2  | 1   | 611608   | 1 | 1 |
| OLR1    | 397577  | 398 | 18  | 739768  | 159488  | 0 | 0 | 1 | 0 | 50 | 59  | 21415536 | 1 | 1 |
| ONECUT3 | NaN     | NaN | NaN | 1164120 | 425064  | 0 | 0 | 0 | 0 | 50 | 116 | 40070648 | 1 | 1 |
| OPALIN  | 799460  | 684 | 38  | 386616  | 105732  | 0 | 0 | 2 | 0 | 3  | 7   | 1326100  | 1 | 1 |
| OPN1MW2 | 2438903 | NaN | 17  | 1859032 | 526880  | 0 | 0 | 0 | 0 | 11 | 7   | 4822376  | 1 | 1 |
| OPRM1   | 44509   | 878 | 0   | 1838740 | 508724  | 0 | 0 | 0 | 0 | 50 | 42  | 21841668 | 1 | 1 |
| OR10A3  | 105341  | 679 | 6   | 773944  | 234248  | 0 | 0 | 1 | 0 | 50 | 63  | 24898284 | 1 | 1 |
| OR10A7  | 411183  | 816 | -1  | 781776  | 232824  | 0 | 0 | 0 | 0 | 50 | 58  | 19503104 | 1 | 1 |
| OR10G3  | 707623  | 533 | 22  | 754364  | 250624  | 0 | 0 | 0 | 0 | 50 | 70  | 23763000 | 1 | 1 |

|        |        |      |     |         |        |   |   |   |   |    |     |          |   |   |
|--------|--------|------|-----|---------|--------|---|---|---|---|----|-----|----------|---|---|
| OR10W1 | 604763 | 835  | -19 | 739768  | 240656 | 0 | 0 | 0 | 0 | 50 | 68  | 16404124 | 1 | 1 |
| OR13C4 | 146816 | 930  | -33 | 782844  | 237096 | 0 | 0 | 2 | 0 | 28 | 39  | 9194412  | 1 | 1 |
| OR13D1 | 161420 | 821  | -14 | 857248  | 253472 | 0 | 0 | 0 | 0 | 50 | 86  | 23751608 | 1 | 1 |
| OR1E1  | 365088 | 515  | 14  | 774300  | 234960 | 0 | 0 | 0 | 0 | 50 | 54  | 23562928 | 1 | 1 |
| OR1E2  | 365088 | 515  | 14  | 796016  | 241012 | 0 | 0 | 1 | 0 | 50 | 54  | 23562928 | 1 | 1 |
| OR1I1  | 990597 | 524  | 16  | 869352  | 269136 | 0 | 0 | 0 | 0 | 10 | 15  | 3457828  | 1 | 1 |
| OR1L4  | 409923 | 553  | 12  | 768604  | 231044 | 0 | 0 | 2 | 0 | 3  | 4   | 974016   | 1 | 1 |
| OR1N1  | 373314 | 646  | 3   | 765756  | 233892 | 0 | 0 | 0 | 0 | 50 | 63  | 22349324 | 1 | 1 |
| OR1Q1  | 407749 | 646  | 9   | 779996  | 227128 | 0 | 0 | 1 | 0 | 50 | 67  | 20364980 | 1 | 1 |
| OR2A42 | 199649 | 767  | -2  | 750448  | 243860 | 0 | 0 | 0 | 0 | 50 | 37  | 24768344 | 1 | 1 |
| OR2A5  | 222080 | 812  | -11 | 762196  | 236384 | 0 | 0 | 1 | 0 | 50 | 70  | 20067720 | 1 | 1 |
| OR2T29 | 116628 | 850  | -20 | 765400  | 227840 | 0 | 0 | 0 | 0 | 50 | 57  | 19537280 | 1 | 1 |
| OR2T5  | 112460 | 903  | -20 | 779996  | 232468 | 0 | 0 | 1 | 0 | 50 | 74  | 22093716 | 1 | 1 |
| OR2W5  | 272980 | 927  | -14 | 782488  | 248132 | 0 | 0 | 0 | 0 | 50 | 59  | 17172372 | 1 | 1 |
| OR3A3  | 365088 | 515  | 14  | 777148  | 253472 | 0 | 0 | 1 | 0 | 50 | 54  | 23562928 | 1 | 1 |
| OR4C45 | NaN    | NaN  | NaN | 768604  | 215024 | 0 | 0 | 0 | 0 | 50 | 116 | 39860608 | 1 | 1 |
| OR4D1  | 851306 | 401  | 14  | 758636  | 235672 | 0 | 0 | 3 | 0 | 0  | 3   | 235672   | 1 | 1 |
| OR4E2  | 658946 | 624  | 20  | 770384  | 233536 | 0 | 0 | 2 | 0 | 30 | 32  | 13383108 | 1 | 1 |
| OR4F16 | NaN    | NaN  | NaN | 1682456 | 515488 | 0 | 0 | 0 | 0 | 9  | 16  | 4872928  | 1 | 1 |
| OR4F21 | 89938  | 794  | 10  | 766824  | 233892 | 0 | 0 | 0 | 0 | 50 | 66  | 22789696 | 1 | 1 |
| OR4F29 | NaN    | NaN  | NaN | 1682456 | 515488 | 0 | 0 | 0 | 0 | 9  | 16  | 4872928  | 1 | 1 |
| OR4F3  | NaN    | NaN  | NaN | 1682456 | 515488 | 0 | 0 | 0 | 0 | 9  | 16  | 4872928  | 1 | 1 |
| OR4F4  | 185501 | 643  | -9  | 755788  | 224636 | 0 | 0 | 1 | 0 | 50 | 55  | 27208368 | 1 | 1 |
| OR4F5  | 369933 | 594  | NaN | 756144  | 224280 | 0 | 0 | 0 | 0 | 50 | 55  | 24344704 | 1 | 1 |
| OR4M2  | 156689 | 855  | -31 | 778928  | 231400 | 0 | 0 | 0 | 0 | 50 | 68  | 20763700 | 1 | 1 |
| OR51T1 | 65798  | 1006 | -15 | 869352  | 267000 | 0 | 0 | 0 | 0 | 1  | 1   | 499824   | 1 | 1 |
| OR52A4 | 109516 | 1024 | -15 | 752940  | 228552 | 0 | 0 | 0 | 0 | 50 | 47  | 18695696 | 1 | 1 |
| OR52N1 | 203856 | 922  | -5  | 791032  | 236384 | 0 | 0 | 0 | 0 | 50 | 39  | 17006476 | 1 | 1 |
| OR56A5 | NaN    | NaN  | NaN | 762196  | 241724 | 0 | 0 | 3 | 0 | 8  | 19  | 4167692  | 1 | 1 |
| OR5B2  | 475497 | 835  | -29 | 772876  | 224636 | 0 | 0 | 3 | 0 | 13 | 14  | 4428996  | 1 | 1 |
| OR5C1  | 433740 | 487  | 10  | 765400  | 262016 | 0 | 0 | 0 | 0 | 50 | 48  | 19317628 | 1 | 1 |
| OR5P3  | 103028 | 823  | -1  | 762908  | 235672 | 0 | 0 | 0 | 0 | 40 | 52  | 18180920 | 1 | 1 |
| OR6C2  | 802038 | 706  | 3   | 776436  | 226416 | 0 | 0 | 4 | 0 | 5  | 8   | 1326100  | 1 | 1 |

|          |         |     |     |         |        |   |   |   |   |    |     |          |   |   |
|----------|---------|-----|-----|---------|--------|---|---|---|---|----|-----|----------|---|---|
| OR6C76   | 802038  | 706 | 3   | 767180  | 234604 | 0 | 0 | 2 | 0 | 16 | 13  | 4515504  | 1 | 1 |
| OR6P1    | NaN     | NaN | NaN | 773944  | 243860 | 0 | 0 | 0 | 0 | 50 | 116 | 39889444 | 1 | 1 |
| OR6X1    | 92984   | 637 | -1  | 758636  | 242080 | 0 | 0 | 0 | 0 | 50 | 47  | 21991544 | 1 | 1 |
| OR7G1    | 311030  | 471 | -63 | 822360  | 252048 | 0 | 0 | 0 | 0 | 9  | 11  | 2373096  | 1 | 1 |
| OR8G2    | 196141  | 921 | -12 | 749736  | 225348 | 0 | 0 | 0 | 0 | 50 | 60  | 20258892 | 1 | 1 |
| OR8U8    | 12744   | 946 | -38 | 241724  | 56248  | 0 | 0 | 0 | 0 | 50 | 111 | 19272060 | 1 | 1 |
| OR9A4    | 198115  | 856 | -6  | 777860  | 231400 | 0 | 0 | 1 | 0 | 50 | 61  | 21007204 | 1 | 1 |
| OR9G9    | 252874  | 882 | -38 | 750092  | 228196 | 0 | 0 | 0 | 0 | 50 | 67  | 16937056 | 1 | 1 |
| ORAI1    | 720229  | 228 | 56  | 741192  | 237096 | 0 | 0 | 0 | 0 | 50 | 83  | 23210132 | 1 | 1 |
| ORC1L    | 815523  | 448 | 26  | 2190824 | 639376 | 0 | 0 | 0 | 0 | 10 | 13  | 4824512  | 1 | 1 |
| ORC2L    | 641949  | 201 | 29  | 1547176 | 373088 | 0 | 0 | 0 | 0 | 11 | 6   | 3543268  | 1 | 1 |
| ORC3L    | 236047  | 435 | 28  | 1896412 | 471344 | 0 | 0 | 0 | 0 | 6  | 3   | 3634404  | 1 | 1 |
| ORC4L    | 90907   | 937 | 4   | 1175512 | 280172 | 0 | 0 | 0 | 0 | 50 | 40  | 22486384 | 1 | 1 |
| ORC5L    | 152701  | 927 | 0   | 1238524 | 316484 | 0 | 0 | 0 | 0 | 50 | 55  | 20707096 | 1 | 1 |
| ORC6L    | 443420  | 253 | -10 | 658600  | 179780 | 0 | 0 | 0 | 0 | 50 | 67  | 21403788 | 1 | 1 |
| ORMDL1   | 398590  | 452 | 25  | 394092  | 112140 | 0 | 0 | 3 | 0 | 0  | 3   | 112140   | 1 | 1 |
| ORMDL2   | 1909014 | 256 | 38  | 390176  | 114988 | 0 | 0 | 0 | 0 | 50 | 69  | 23288452 | 1 | 1 |
| ORMDL3   | 1602321 | 292 | 18  | 392668  | 113564 | 0 | 0 | 0 | 0 | 50 | 82  | 23538364 | 1 | 1 |
| OSBPL2   | 990360  | 252 | 9   | 1278040 | 314348 | 0 | 0 | 0 | 0 | 0  | 0   | 314348   | 1 | 1 |
| OST4     | NaN     | NaN | NaN | 102172  | 27056  | 0 | 0 | 0 | 0 | 50 | 116 | 39672640 | 1 | 1 |
| OSTBETA  | 688371  | 189 | 44  | 331792  | 90068  | 0 | 0 | 0 | 0 | 50 | 72  | 23489592 | 1 | 1 |
| OSTC     | 160719  | 574 | 14  | 388752  | 106800 | 0 | 0 | 0 | 0 | 50 | 46  | 20184844 | 1 | 1 |
| OSTalpha | 1042183 | 210 | 51  | 854756  | 271984 | 0 | 0 | 0 | 0 | 40 | 55  | 13677164 | 1 | 1 |
| OTOR     | 76240   | 856 | -21 | 342472  | 85796  | 0 | 0 | 0 | 0 | 50 | 67  | 21170608 | 1 | 1 |
| OTOS     | 340416  | 482 | 28  | 233892  | 63012  | 0 | 0 | 0 | 0 | 50 | 52  | 22426576 | 1 | 1 |
| OTUD1    | NaN     | NaN | NaN | 1156288 | 388040 | 0 | 0 | 0 | 0 | 50 | 116 | 40033624 | 1 | 1 |
| OVCA2    | 1415256 | 294 | 27  | 551800  | 185120 | 0 | 0 | 0 | 0 | 50 | 68  | 21536932 | 1 | 1 |
| OVOL1    | 3834148 | 287 | 55  | 681740  | 189748 | 0 | 0 | 3 | 0 | 0  | 3   | 189748   | 1 | 1 |
| OVOL2    | 764857  | 499 | -9  | 702388  | 194732 | 0 | 0 | 3 | 0 | 7  | 13  | 2373808  | 1 | 1 |
| OXA1L    | 1153069 | 351 | 36  | 1250272 | 377360 | 0 | 0 | 0 | 0 | 11 | 13  | 4543984  | 1 | 1 |
| OXT      | 835590  | 288 | 54  | 320044  | 96476  | 0 | 0 | 2 | 0 | 10 | 11  | 1775372  | 1 | 1 |
| P2RX1    | 561462  | 215 | 32  | 1044148 | 284444 | 0 | 0 | 0 | 0 | 50 | 57  | 20132868 | 1 | 1 |
| P2RX4    | 1003980 | 396 | 45  | 1017804 | 275544 | 0 | 0 | 0 | 0 | 50 | 73  | 21384920 | 1 | 1 |



|           |         |      |     |         |        |   |   |   |   |    |     |          |   |   |
|-----------|---------|------|-----|---------|--------|---|---|---|---|----|-----|----------|---|---|
| P2RY11    | 1675365 | 272  | 15  | 18868   | 3560   | 0 | 0 | 0 | 0 | 0  | 0   | 3560     | 1 | 1 |
| P2RY12    | 51795   | 505  | 10  | 855824  | 247420 | 0 | 0 | 1 | 0 | 50 | 64  | 25325484 | 1 | 1 |
| P2RY4     | 161347  | NaN  | 27  | 876472  | 296192 | 0 | 0 | 2 | 0 | 18 | 20  | 8351404  | 1 | 1 |
| P4HA2     | 371617  | 246  | 35  | 1453192 | 392312 | 0 | 0 | 1 | 0 | 35 | 25  | 11825964 | 1 | 1 |
| 'ABPC1L2L | NaN     | NaN  | NaN | 500892  | 143112 | 0 | 0 | 0 | 0 | 50 | 116 | 39788696 | 1 | 1 |
| 'ABPC1L2I | NaN     | NaN  | NaN | 500892  | 143112 | 0 | 0 | 0 | 0 | 50 | 116 | 39788696 | 1 | 1 |
| PABPC4L   | NaN     | NaN  | NaN | 1086156 | 292632 | 0 | 0 | 0 | 0 | 50 | 116 | 39938216 | 1 | 1 |
| PACRGL    | 42454   | 1252 | 22  | 578144  | 163048 | 0 | 0 | 0 | 0 | 50 | 47  | 20860888 | 1 | 1 |
| PAEP      | 327501  | 539  | 37  | 484516  | 125312 | 0 | 0 | 0 | 0 | 50 | 46  | 18874052 | 1 | 1 |
| PAG1      | 185952  | 441  | 18  | 1109296 | 303668 | 0 | 0 | 0 | 0 | 50 | 55  | 18831332 | 1 | 1 |
| PAGE2     | 214019  | NaN  | 18  | 301888  | 76184  | 0 | 0 | 0 | 0 | 50 | 59  | 20814964 | 1 | 1 |
| PAGE2B    | 214019  | NaN  | 18  | 301176  | 75828  | 0 | 0 | 0 | 0 | 50 | 59  | 20814964 | 1 | 1 |
| LM2-AKA   | 250166  | 485  | 18  | 2784632 | 798508 | 0 | 0 | 2 | 0 | 50 | 48  | 20858396 | 1 | 1 |
| PALM3     | NaN     | NaN  | NaN | 1666080 | 514776 | 0 | 0 | 0 | 0 | 9  | 16  | 4872216  | 1 | 1 |
| PAPL      | 1652812 | 254  | 29  | 1133148 | 320400 | 0 | 0 | 1 | 0 | 34 | 41  | 15057376 | 1 | 1 |
| PARN      | 519767  | 367  | 31  | 1760420 | 392668 | 0 | 0 | 0 | 0 | 32 | 27  | 13342880 | 1 | 1 |
| PATE1     | 607531  | 493  | 3   | 349236  | 76896  | 0 | 0 | 1 | 0 | 6  | 7   | 2338564  | 1 | 1 |
| PATE3     | NaN     | NaN  | NaN | 266288  | 61588  | 0 | 0 | 0 | 0 | 50 | 116 | 39707172 | 1 | 1 |
| PATE4     | NaN     | NaN  | NaN | 266288  | 61588  | 0 | 0 | 0 | 0 | 50 | 116 | 39707172 | 1 | 1 |
| PATL2     | NaN     | NaN  | NaN | 1410828 | 396228 | 0 | 0 | 0 | 0 | 50 | 116 | 40041812 | 1 | 1 |
| PCBD1     | 327428  | 592  | 29  | 277680  | 71556  | 0 | 0 | 0 | 0 | 50 | 51  | 23052424 | 1 | 1 |
| PCBD2     | 727517  | 696  | 49  | 338912  | 95764  | 0 | 0 | 1 | 0 | 7  | 10  | 2830556  | 1 | 1 |
| PCBP2     | 1712232 | 191  | 56  | 969032  | 266644 | 0 | 0 | 1 | 0 | 50 | 69  | 22534088 | 1 | 1 |
| PCDP1     | 309897  | 441  | 17  | 1478468 | 368104 | 0 | 0 | 0 | 0 | 20 | 21  | 10460348 | 1 | 1 |
| PCGF3     | 672497  | 312  | 27  | 658600  | 154148 | 0 | 0 | 0 | 0 | 50 | 53  | 25717440 | 1 | 1 |
| PCGF6     | 533950  | 125  | 43  | 914208  | 250980 | 0 | 0 | 1 | 0 | 50 | 45  | 17906088 | 1 | 1 |
| PCMT1     | 424800  | 234  | 40  | 740124  | 208260 | 0 | 0 | 0 | 0 | 50 | 35  | 18596016 | 1 | 1 |
| PCOTH     | 314992  | 678  | 51  | 605556  | 160200 | 0 | 0 | 0 | 0 | 20 | 20  | 5337508  | 1 | 1 |
| PCP4      | 177752  | 829  | -71 | 173016  | 39516  | 0 | 0 | 0 | 0 | 50 | 77  | 21869436 | 1 | 1 |
| PCP4L1    | 735152  | 293  | 41  | 184052  | 45568  | 0 | 0 | 0 | 0 | 50 | 46  | 22289160 | 1 | 1 |
| PCSK1N    | NaN     | NaN  | NaN | 602352  | 244572 | 0 | 0 | 0 | 0 | 50 | 116 | 39890156 | 1 | 1 |
| PCTP      | 56508   | 631  | -60 | 567108  | 143112 | 0 | 0 | 1 | 0 | 50 | 104 | 24466100 | 1 | 1 |
| PCYT1B    | 424049  | NaN  | 31  | 1054116 | 268068 | 0 | 0 | 0 | 0 | 43 | 44  | 15155276 | 1 | 1 |

|         |         |      |     |         |        |   |   |   |   |    |     |          |   |   |
|---------|---------|------|-----|---------|--------|---|---|---|---|----|-----|----------|---|---|
| PDAP1   | 1115689 | 263  | 56  | 485584  | 118904 | 0 | 0 | 1 | 0 | 0  | 1   | 118904   | 1 | 1 |
| PDC     | 278089  | 492  | -7  | 648632  | 155572 | 0 | 0 | 0 | 0 | 50 | 59  | 25737020 | 1 | 1 |
| PDCL2   | 237456  | 456  | 32  | 656820  | 143112 | 0 | 0 | 1 | 0 | 50 | 73  | 26751620 | 1 | 1 |
| PDE6D   | 979792  | 193  | 33  | 401212  | 99680  | 0 | 0 | 0 | 0 | 50 | 65  | 18656536 | 1 | 1 |
| PDE6G   | 3745109 | 205  | 30  | 231756  | 63012  | 0 | 0 | 0 | 0 | 50 | 50  | 17890424 | 1 | 1 |
| PDF     | 1202748 | 125  | 20  | 584908  | 203276 | 0 | 0 | 0 | 0 | 20 | 22  | 7617688  | 1 | 1 |
| PDGFA   | 598406  | 318  | 9   | 563548  | 155216 | 0 | 0 | 0 | 0 | 50 | 80  | 29320872 | 1 | 1 |
| PDPR    | 1339196 | 137  | 19  | 2276976 | 615168 | 0 | 0 | 5 | 0 | 9  | 11  | 2905672  | 1 | 1 |
| PDRG1   | 1006109 | 386  | 37  | 357780  | 88644  | 0 | 0 | 2 | 0 | 4  | 11  | 1044504  | 1 | 1 |
| PDZK1   | NaN     | NaN  | NaN | 1331796 | 368460 | 0 | 0 | 1 | 0 | 50 | 117 | 40014044 | 1 | 1 |
| PEBP1   | 637549  | 608  | 17  | 480956  | 134212 | 0 | 0 | 1 | 0 | 18 | 23  | 7133172  | 1 | 1 |
| PECAM1  | 1304459 | 178  | 16  | 24208   | 7832   | 0 | 0 | 0 | 0 | 0  | 0   | 7832     | 1 | 1 |
| PECI    | 180813  | 452  | 27  | 1039520 | 275188 | 0 | 0 | 0 | 0 | 36 | 36  | 13624476 | 1 | 1 |
| PECR    | 603452  | 419  | 35  | 784624  | 221432 | 0 | 0 | 0 | 0 | 50 | 58  | 22205500 | 1 | 1 |
| PET112L | 146825  | 477  | 14  | 1439308 | 401924 | 0 | 0 | 0 | 0 | 20 | 15  | 7870448  | 1 | 1 |
| PET117  | 782027  | 479  | -6  | 211108  | 58028  | 0 | 0 | 0 | 0 | 50 | 53  | 15933848 | 1 | 1 |
| PEX5    | 1322142 | 267  | 27  | 1684948 | 482024 | 0 | 0 | 0 | 0 | 6  | 5   | 2677476  | 1 | 1 |
| PF4     | 230379  | 408  | 2   | 257744  | 79744  | 0 | 0 | 0 | 0 | 50 | 43  | 23670796 | 1 | 1 |
| PFDN1   | 764742  | 185  | 39  | 328944  | 80100  | 0 | 0 | 0 | 0 | 50 | 52  | 16695688 | 1 | 1 |
| PFDN4   | 78451   | 492  | -28 | 365256  | 80100  | 0 | 0 | 0 | 0 | 50 | 102 | 21816036 | 1 | 1 |
| PFKL    | 1153513 | 308  | 65  | 2002856 | 591316 | 0 | 0 | 2 | 0 | 50 | 59  | 19026776 | 1 | 1 |
| PFN2    | 622464  | 490  | 17  | 449272  | 119972 | 0 | 0 | 0 | 0 | 50 | 68  | 19536924 | 1 | 1 |
| PFN3    | 1038665 | 261  | 59  | 328232  | 118192 | 0 | 0 | 0 | 0 | 50 | 73  | 23403440 | 1 | 1 |
| PGA3    | 1023217 | 531  | 47  | 993596  | 289072 | 0 | 0 | 0 | 0 | 50 | 86  | 29296664 | 1 | 1 |
| PGA4    | NaN     | NaN  | NaN | 993596  | 289072 | 0 | 0 | 0 | 0 | 50 | 116 | 39934656 | 1 | 1 |
| PGAM1   | 892254  | 188  | 39  | 649700  | 182272 | 0 | 0 | 1 | 0 | 50 | 71  | 21552240 | 1 | 1 |
| PGBD3   | 122000  | 224  | 15  | 1495556 | 411892 | 0 | 0 | 0 | 0 | 13 | 8   | 4717000  | 1 | 1 |
| PGCP    | 235137  | 741  | -10 | 1202924 | 342472 | 0 | 0 | 0 | 0 | 46 | 63  | 22952744 | 1 | 1 |
| PGK2    | 67972   | 1246 | 2   | 1034892 | 304380 | 0 | 0 | 2 | 0 | 1  | 3   | 540052   | 1 | 1 |
| PGLS    | 961640  | 206  | 42  | 631900  | 217160 | 0 | 0 | 2 | 0 | 3  | 3   | 1578860  | 1 | 1 |
| PGLYRP3 | 836876  | 556  | 24  | 877896  | 247776 | 0 | 0 | 2 | 0 | 5  | 13  | 2804212  | 1 | 1 |
| PGPEP1L | 217299  | 248  | -20 | 495196  | 153080 | 0 | 0 | 1 | 0 | 50 | 59  | 22018956 | 1 | 1 |
| PHB     | 733027  | 256  | 23  | 686368  | 213956 | 0 | 0 | 2 | 0 | 35 | 41  | 13634444 | 1 | 1 |

|          |         |     |     |         |         |   |   |   |   |    |     |          |   |   |
|----------|---------|-----|-----|---------|---------|---|---|---|---|----|-----|----------|---|---|
| PHF15    | 909404  | 177 | 51  | 1982564 | 592384  | 0 | 0 | 0 | 0 | 1  | 2   | 1395520  | 1 | 1 |
| PHF16    | 830380  | NaN | 45  | 2140272 | 542544  | 0 | 0 | 0 | 0 | 29 | 17  | 10428664 | 1 | 1 |
| PHF17    | 163287  | 544 | 26  | 2183704 | 586688  | 0 | 0 | 0 | 0 | 11 | 7   | 4399448  | 1 | 1 |
| PHF21B   | 350834  | 525 | -5  | 1342476 | 417588  | 0 | 0 | 1 | 0 | 26 | 32  | 11695312 | 1 | 1 |
| PHF5A    | 1480984 | 187 | 73  | 300108  | 70488   | 0 | 0 | 0 | 0 | 50 | 55  | 16540828 | 1 | 1 |
| PHGR1    | NaN     | NaN | NaN | 206836  | 67640   | 0 | 0 | 0 | 0 | 50 | 116 | 39713224 | 1 | 1 |
| PHLDA2   | 552601  | 256 | 34  | 378428  | 118192  | 0 | 0 | 0 | 0 | 50 | 59  | 21410552 | 1 | 1 |
| PHOSPHO  | 763613  | 346 | 27  | 757212  | 240300  | 0 | 0 | 1 | 0 | 27 | 34  | 13858724 | 1 | 1 |
| PHOX2A   | 744547  | 182 | 58  | 687436  | 234248  | 0 | 0 | 1 | 0 | 50 | 69  | 18856964 | 1 | 1 |
| PHPT1    | 1921909 | 176 | 44  | 384124  | 91136   | 0 | 0 | 0 | 0 | 50 | 56  | 20791468 | 1 | 1 |
| PHYHIP   | 587455  | 196 | 50  | 848704  | 228908  | 0 | 0 | 0 | 0 | 50 | 67  | 20087300 | 1 | 1 |
| PID1     | 105238  | 675 | -12 | 668568  | 176220  | 0 | 0 | 0 | 0 | 50 | 66  | 28734540 | 1 | 1 |
| PIF1     | 556478  | 205 | 50  | 1575300 | 532932  | 0 | 0 | 1 | 0 | 50 | 48  | 18457888 | 1 | 1 |
| PIGH     | 483892  | 311 | 46  | 480956  | 139552  | 0 | 0 | 0 | 0 | 50 | 46  | 20345400 | 1 | 1 |
| PIGP     | 353934  | 358 | 51  | 414384  | 107868  | 0 | 0 | 1 | 0 | 42 | 44  | 14645840 | 1 | 1 |
| PIGX     | 818753  | 446 | 45  | 714848  | 198292  | 0 | 0 | 0 | 0 | 50 | 63  | 24450080 | 1 | 1 |
| PIGY     | 449479  | 295 | 29  | 458884  | 144536  | 0 | 0 | 1 | 0 | 50 | 41  | 15076956 | 1 | 1 |
| PIM3     | 842221  | 271 | 15  | 808476  | 260592  | 0 | 0 | 1 | 0 | 50 | 69  | 23287384 | 1 | 1 |
| PIN1     | 1069900 | 579 | -26 | 428268  | 112140  | 0 | 0 | 0 | 0 | 50 | 87  | 20502040 | 1 | 1 |
| PIN4     | 374992  | NaN | 53  | 486296  | 129940  | 0 | 0 | 1 | 0 | 50 | 50  | 16164536 | 1 | 1 |
| PINK1    | 631461  | 208 | 35  | 1424712 | 472056  | 0 | 0 | 1 | 0 | 50 | 63  | 21866232 | 1 | 1 |
| PION     | 309983  | 573 | 35  | 2312220 | 557496  | 0 | 0 | 0 | 0 | 6  | 3   | 2056968  | 1 | 1 |
| PIRT     | 58616   | 911 | -49 | 339268  | 102884  | 0 | 0 | 1 | 0 | 2  | 2   | 730868   | 1 | 1 |
| PITX1    | 725156  | 226 | 27  | 781064  | 236740  | 0 | 0 | 1 | 0 | 50 | 83  | 24477492 | 1 | 1 |
| PKD1L3   | NaN     | NaN | NaN | 4441812 | 1229268 | 0 | 0 | 0 | 0 | 0  | 0   | 1229268  | 1 | 1 |
| PKM2     | 1130931 | 192 | 36  | 1494132 | 435744  | 0 | 0 | 0 | 0 | 16 | 19  | 7218256  | 1 | 1 |
| PKMYT1   | 1443513 | 234 | 49  | 1280532 | 391956  | 0 | 0 | 1 | 0 | 14 | 11  | 5039180  | 1 | 1 |
| PL-5283  | NaN     | NaN | NaN | 130652  | 31684   | 0 | 0 | 0 | 0 | 50 | 116 | 39677268 | 1 | 1 |
| PLA2G10  | 519767  | 367 | 45  | 422572  | 124244  | 0 | 0 | 0 | 0 | 50 | 58  | 18288076 | 1 | 1 |
| PLA2G12A | 211934  | 473 | 25  | 486652  | 134924  | 0 | 0 | 1 | 0 | 3  | 3   | 749024   | 1 | 1 |
| PLA2G16  | 854193  | 303 | 56  | 423996  | 115344  | 0 | 0 | 1 | 0 | 50 | 62  | 16526588 | 1 | 1 |
| PLA2G2C  | 608368  | 501 | 27  | 394092  | 98256   | 0 | 0 | 0 | 0 | 50 | 65  | 19952732 | 1 | 1 |
| PLA2G2D  | 567393  | 501 | 23  | 387328  | 95408   | 0 | 0 | 0 | 0 | 50 | 58  | 17485652 | 1 | 1 |

|         |         |     |     |         |        |   |   |   |   |    |     |          |   |   |
|---------|---------|-----|-----|---------|--------|---|---|---|---|----|-----|----------|---|---|
| PLA2G4B | 874211  | 259 | 40  | 2002856 | 585976 | 0 | 0 | 0 | 0 | 10 | 18  | 9759740  | 1 | 1 |
| PLA2G4E | 733131  | 267 | 42  | 2165192 | 603064 | 0 | 0 | 2 | 0 | 8  | 11  | 2939492  | 1 | 1 |
| PLAC1L  | 336373  | 691 | 4   | 411536  | 110716 | 0 | 0 | 0 | 0 | 50 | 70  | 21435828 | 1 | 1 |
| PLAC4   | 187016  | 530 | -16 | 352084  | 131720 | 0 | 0 | 0 | 0 | 50 | 77  | 26022532 | 1 | 1 |
| PLAC8   | 361292  | 169 | 58  | 310076  | 78676  | 0 | 0 | 0 | 0 | 50 | 62  | 21214752 | 1 | 1 |
| PLBD2   | 442841  | 251 | 37  | 1495912 | 443576 | 0 | 0 | 1 | 0 | 50 | 36  | 17266712 | 1 | 1 |
| PLCXD1  | NaN     | NaN | NaN | 819868  | 243860 | 0 | 0 | 4 | 0 | 2  | 8   | 1100396  | 1 | 1 |
| PLDN    | 200904  | 369 | 3   | 458172  | 113208 | 0 | 0 | 0 | 0 | 50 | 39  | 22335796 | 1 | 1 |
| PLEK2   | 484235  | 291 | 32  | 915988  | 254540 | 0 | 0 | 2 | 0 | 2  | 2   | 637952   | 1 | 1 |
| PLEKHA9 | 168990  | 630 | -14 | 987900  | 268068 | 0 | 0 | 0 | 0 | 50 | 50  | 23471080 | 1 | 1 |
| PLEKHF1 | 222973  | 612 | -63 | 690640  | 210752 | 0 | 0 | 0 | 0 | 50 | 115 | 29520588 | 1 | 1 |
| PLGLB1  | NaN     | NaN | NaN | 532576  | 121040 | 0 | 0 | 0 | 0 | 50 | 116 | 39766624 | 1 | 1 |
| PLGLB2  | NaN     | NaN | NaN | 532576  | 121040 | 0 | 0 | 0 | 0 | 50 | 116 | 39766624 | 1 | 1 |
| PLK1S1  | 302588  | 632 | -13 | 1768252 | 443576 | 0 | 0 | 0 | 0 | 34 | 16  | 11197624 | 1 | 1 |
| PLSCR3  | 1911735 | 206 | 36  | 734428  | 239588 | 0 | 0 | 0 | 0 | 50 | 69  | 22072000 | 1 | 1 |
| PLUNC   | 478384  | 482 | 27  | 644004  | 213600 | 0 | 0 | 0 | 0 | 8  | 0   | 2332512  | 1 | 1 |
| PM20D2  | 376032  | 446 | 27  | 1102532 | 325384 | 0 | 0 | 1 | 0 | 3  | 3   | 1452836  | 1 | 1 |
| PMAIP1  | 200064  | 434 | 48  | 139552  | 40940  | 0 | 0 | 1 | 0 | 0  | 1   | 40940    | 1 | 1 |
| PMP2    | 191177  | 595 | 1   | 353508  | 87576  | 0 | 0 | 0 | 0 | 50 | 53  | 20427636 | 1 | 1 |
| PNMA6A  | NaN     | NaN | NaN | 1925248 | 637952 | 0 | 0 | 0 | 0 | 7  | 14  | 4326112  | 1 | 1 |
| PNRC2   | NaN     | NaN | NaN | 362764  | 90068  | 0 | 0 | 0 | 0 | 50 | 116 | 39735652 | 1 | 1 |
| POC1B   | 236022  | 460 | -6  | 1249204 | 332504 | 0 | 0 | 0 | 0 | 50 | 47  | 18158848 | 1 | 1 |
| PODNL1  | 930314  | 231 | 32  | 1247424 | 447492 | 0 | 0 | 1 | 0 | 50 | 60  | 18484588 | 1 | 1 |
| POFUT2  | 596236  | 334 | 45  | 1221792 | 338556 | 0 | 0 | 1 | 0 | 50 | 56  | 22040316 | 1 | 1 |
| POLB    | 524868  | 327 | 41  | 915276  | 216804 | 0 | 0 | 0 | 0 | 50 | 46  | 18041012 | 1 | 1 |
| POLD4   | 1269888 | 177 | 51  | 281952  | 76896  | 0 | 0 | 0 | 0 | 50 | 45  | 20698908 | 1 | 1 |
| POLR2G  | 2405109 | 248 | 44  | 462800  | 121396 | 0 | 0 | 2 | 0 | 7  | 12  | 2285876  | 1 | 1 |
| POLR2J  | 642828  | 230 | 65  | 312212  | 80812  | 0 | 0 | 0 | 0 | 50 | 41  | 15606684 | 1 | 1 |
| POLR2J2 | NaN     | NaN | NaN | 304380  | 84372  | 0 | 0 | 1 | 0 | 26 | 41  | 11661492 | 1 | 1 |
| POLR2K  | 810757  | 396 | 25  | 169100  | 32752  | 0 | 0 | 0 | 0 | 50 | 67  | 28712824 | 1 | 1 |
| POLR2L  | 1799017 | 232 | 51  | 172304  | 51976  | 0 | 0 | 1 | 0 | 2  | 2   | 469564   | 1 | 1 |
| POLR3D  | 586506  | 193 | 43  | 1014244 | 298328 | 0 | 0 | 0 | 0 | 50 | 73  | 21834904 | 1 | 1 |
| POLR3K  | 712205  | 238 | 36  | 286224  | 73692  | 0 | 0 | 0 | 0 | 50 | 62  | 19943476 | 1 | 1 |

|          |         |      |     |         |        |   |   |   |   |    |     |          |   |   |
|----------|---------|------|-----|---------|--------|---|---|---|---|----|-----|----------|---|---|
| POM121L2 | NaN     | NaN  | NaN | 2495916 | 825564 | 0 | 0 | 0 | 0 | 7  | 14  | 4513724  | 1 | 1 |
| POMP     | 167695  | 629  | 37  | 381988  | 96476  | 0 | 0 | 0 | 0 | 50 | 62  | 16797860 | 1 | 1 |
| POP4     | 223167  | 612  | -63 | 585264  | 150588 | 0 | 0 | 3 | 0 | 3  | 8   | 1236744  | 1 | 1 |
| POP5     | 1615212 | 311  | 34  | 433608  | 113208 | 0 | 0 | 0 | 0 | 50 | 52  | 20694992 | 1 | 1 |
| POTEB    | NaN     | NaN  | NaN | 2173736 | 528304 | 0 | 0 | 0 | 0 | 9  | 16  | 4885744  | 1 | 1 |
| POTED    | 42480   | 1066 | -58 | 1552160 | 369172 | 0 | 0 | 0 | 0 | 10 | 19  | 4540780  | 1 | 1 |
| POU1F1   | 58819   | 470  | -15 | 824140  | 216092 | 0 | 0 | 0 | 0 | 50 | 67  | 23598528 | 1 | 1 |
| POU5F2   | 263452  | 587  | 3   | 794592  | 261660 | 0 | 0 | 0 | 0 | 50 | 58  | 21330096 | 1 | 1 |
| PPAN     | NaN     | NaN  | NaN | 1058388 | 296904 | 0 | 0 | 0 | 0 | 50 | 116 | 39942488 | 1 | 1 |
| PPAPDC1A | 261792  | 849  | 5   | 699184  | 197936 | 0 | 0 | 1 | 0 | 50 | 66  | 20411616 | 1 | 1 |
| PPAPDC2  | 224825  | 673  | 12  | 705236  | 245284 | 0 | 0 | 1 | 0 | 50 | 77  | 24742712 | 1 | 1 |
| PPIA     | 1200579 | 164  | 55  | 438948  | 112140 | 0 | 0 | 0 | 0 | 50 | 70  | 24613484 | 1 | 1 |
| PPIAL4B  | NaN     | NaN  | NaN | 1260240 | 338556 | 0 | 0 | 0 | 0 | 50 | 116 | 39984140 | 1 | 1 |
| PPIAL4C  | 397277  | 779  | 29  | 840160  | 225704 | 0 | 0 | 0 | 0 | 38 | 25  | 14914976 | 1 | 1 |
| PPIAL4D  | NaN     | NaN  | NaN | 833752  | 227840 | 0 | 0 | 1 | 0 | 50 | 117 | 39873424 | 1 | 1 |
| PPIAL4E  | NaN     | NaN  | NaN | 416876  | 113920 | 0 | 0 | 0 | 0 | 50 | 116 | 39759504 | 1 | 1 |
| PPIAL4F  | 216744  | 582  | 41  | 833752  | 227840 | 0 | 0 | 0 | 0 | 50 | 54  | 20450420 | 1 | 1 |
| PPIAL4G  | 119504  | 375  | 34  | 419724  | 111072 | 0 | 0 | 0 | 0 | 50 | 59  | 20323328 | 1 | 1 |
| PPIC     | 183387  | 519  | 12  | 540764  | 158776 | 0 | 0 | 1 | 0 | 5  | 8   | 2404424  | 1 | 1 |
| PPIL3    | 635570  | 201  | 31  | 532220  | 129940 | 0 | 0 | 0 | 0 | 50 | 61  | 17116836 | 1 | 1 |
| PPIL5    | 563227  | 409  | -4  | 1081528 | 260948 | 0 | 0 | 0 | 0 | 50 | 55  | 20194100 | 1 | 1 |
| PPME1    | 628196  | 280  | 38  | 1029908 | 267712 | 0 | 0 | 1 | 0 | 50 | 64  | 18575012 | 1 | 1 |
| PPP1R14B | 1613996 | 257  | 65  | 373800  | 113208 | 0 | 0 | 1 | 0 | 19 | 29  | 6446448  | 1 | 1 |
| PPP1R14D | 1036414 | 172  | 51  | 553224  | 110004 | 0 | 0 | 1 | 0 | 39 | 55  | 14892192 | 1 | 1 |
| PPP1R1A  | 643658  | 392  | 33  | 451764  | 124956 | 0 | 0 | 0 | 0 | 50 | 58  | 20886164 | 1 | 1 |
| PPP1R3G  | NaN     | NaN  | NaN | 852620  | 297616 | 0 | 0 | 0 | 0 | 50 | 116 | 39943200 | 1 | 1 |
| PPP2R4   | 1440213 | 206  | 34  | 946960  | 245996 | 0 | 0 | 0 | 0 | 50 | 83  | 27113316 | 1 | 1 |
| PPPDE1   | 718652  | 540  | -1  | 505164  | 136704 | 0 | 0 | 0 | 0 | 50 | 92  | 22613120 | 1 | 1 |
| PPPDE2   | 1471218 | 183  | 58  | 436456  | 128516 | 0 | 0 | 0 | 0 | 50 | 56  | 19858392 | 1 | 1 |
| PPT1     | 873408  | 387  | 23  | 807052  | 210752 | 0 | 0 | 0 | 0 | 50 | 79  | 27832436 | 1 | 1 |
| PPY      | 920082  | 241  | 29  | 239944  | 78320  | 0 | 0 | 0 | 0 | 50 | 50  | 17463580 | 1 | 1 |
| PPYR1    | NaN     | NaN  | NaN | 922396  | 286580 | 0 | 0 | 0 | 0 | 50 | 116 | 39932164 | 1 | 1 |
| PRAC     | 873680  | 509  | 26  | 147740  | 44500  | 0 | 0 | 0 | 0 | 50 | 70  | 19254972 | 1 | 1 |

|          |         |     |     |         |         |   |   |   |   |    |     |          |   |   |
|----------|---------|-----|-----|---------|---------|---|---|---|---|----|-----|----------|---|---|
| PRAF2    | 833689  | NaN | 41  | 431116  | 153080  | 0 | 0 | 0 | 0 | 50 | 74  | 21714932 | 1 | 1 |
| PRAMEF13 | NaN     | NaN | NaN | 1195092 | 339624  | 0 | 0 | 0 | 0 | 50 | 116 | 39985208 | 1 | 1 |
| PRAMEF16 | NaN     | NaN | NaN | 1194736 | 337844  | 0 | 0 | 0 | 0 | 50 | 116 | 39983428 | 1 | 1 |
| PRAMEF21 | 61945   | NaN | 7   | 2387336 | 697048  | 0 | 0 | 0 | 0 | 2  | 2   | 1422576  | 1 | 1 |
| PRAMEF22 | NaN     | NaN | NaN | 2403356 | 704524  | 0 | 0 | 0 | 0 | 7  | 14  | 4392684  | 1 | 1 |
| PRAMEF3  | NaN     | NaN | NaN | 1201856 | 353152  | 0 | 0 | 0 | 0 | 50 | 116 | 39998736 | 1 | 1 |
| PRAMEF9  | 60626   | NaN | 8   | 2407984 | 687080  | 0 | 0 | 0 | 0 | 0  | 0   | 687080   | 1 | 1 |
| PRB1     | 175992  | 673 | -18 | 805272  | 273408  | 0 | 0 | 0 | 0 | 15 | 35  | 9917804  | 1 | 1 |
| PRB3     | 311837  | 673 | -1  | 750448  | 262016  | 0 | 0 | 0 | 0 | 8  | 4   | 2073344  | 1 | 1 |
| PRCD     | 1016866 | 197 | 24  | 149520  | 40584   | 0 | 0 | 0 | 0 | 50 | 75  | 20563984 | 1 | 1 |
| PRDM12   | 505506  | 211 | 24  | 920972  | 277324  | 0 | 0 | 0 | 0 | 25 | 34  | 10186940 | 1 | 1 |
| PRDM6    | NaN     | NaN | NaN | 1484164 | 455324  | 0 | 0 | 0 | 0 | 50 | 116 | 40100908 | 1 | 1 |
| PRELID1  | 942017  | 227 | 53  | 564616  | 157352  | 0 | 0 | 2 | 0 | 13 | 20  | 4127820  | 1 | 1 |
| PRELID2  | 342210  | 568 | -3  | 517980  | 124956  | 0 | 0 | 2 | 0 | 5  | 7   | 862944   | 1 | 1 |
| PRELP    | 529605  | 314 | 28  | 943400  | 292276  | 0 | 0 | 1 | 0 | 50 | 66  | 20381000 | 1 | 1 |
| PRH2     | NaN     | NaN | NaN | 419724  | 131364  | 0 | 0 | 0 | 0 | 50 | 116 | 39776948 | 1 | 1 |
| PRHOXNE  | 309835  | 614 | 47  | 421860  | 139908  | 0 | 0 | 0 | 0 | 50 | 55  | 18324388 | 1 | 1 |
| PRIC285  | 1178905 | 193 | 54  | 6458908 | 2131016 | 0 | 0 | 0 | 0 | 0  | 0   | 2131016  | 1 | 1 |
| PRIM1    | 2637730 | 154 | 47  | 1145964 | 256320  | 0 | 0 | 0 | 0 | 11 | 12  | 6165920  | 1 | 1 |
| PRIM2    | 177580  | 847 | -16 | 1370956 | 327164  | 0 | 0 | 1 | 0 | 47 | 54  | 17740192 | 1 | 1 |
| PRIMA1   | 311378  | 676 | 19  | 390532  | 119972  | 0 | 0 | 1 | 0 | 2  | 4   | 1441800  | 1 | 1 |
| PRKAB2   | 457805  | 737 | 33  | 714492  | 190104  | 0 | 0 | 0 | 0 | 50 | 47  | 19391320 | 1 | 1 |
| PRKAG3   | 1077853 | 296 | 40  | 1247068 | 376292  | 0 | 0 | 1 | 0 | 50 | 83  | 24994048 | 1 | 1 |
| PRKCDP   | 444453  | 625 | -7  | 621220  | 224636  | 0 | 0 | 0 | 0 | 50 | 51  | 16375288 | 1 | 1 |
| PRLH     | 492799  | 440 | 11  | 210396  | 74760   | 0 | 0 | 0 | 0 | 50 | 68  | 23707108 | 1 | 1 |
| PRM3     | 632841  | 308 | 37  | 259524  | 70488   | 0 | 0 | 0 | 0 | 50 | 60  | 21937788 | 1 | 1 |
| PRMT10   | 71970   | 263 | 20  | 2181568 | 576008  | 0 | 0 | 0 | 0 | 9  | 11  | 4957656  | 1 | 1 |
| PROCR    | 1346435 | 168 | 46  | 592740  | 185832  | 0 | 0 | 1 | 0 | 17 | 32  | 7653644  | 1 | 1 |
| PRODH    | 513620  | 343 | 5   | 1533648 | 449628  | 0 | 0 | 0 | 0 | 50 | 57  | 23414832 | 1 | 1 |
| PROK1    | 403650  | 479 | 31  | 271272  | 79032   | 0 | 0 | 1 | 0 | 2  | 1   | 557852   | 1 | 1 |
| PROK2    | 86859   | 605 | 6   | 334284  | 95052   | 0 | 0 | 0 | 0 | 50 | 74  | 20739492 | 1 | 1 |
| PROP1    | 961008  | 363 | 32  | 556072  | 179780  | 0 | 0 | 0 | 0 | 50 | 53  | 18751944 | 1 | 1 |
| P RR13   | 1712232 | 191 | 56  | 381988  | 108224  | 0 | 0 | 0 | 0 | 50 | 69  | 22534088 | 1 | 1 |

|          |         |     |     |         |        |   |   |   |   |    |     |          |   |   |
|----------|---------|-----|-----|---------|--------|---|---|---|---|----|-----|----------|---|---|
| PRR15    | 313344  | 579 | -1  | 318976  | 97544  | 0 | 0 | 0 | 0 | 50 | 57  | 16687500 | 1 | 1 |
| PRR18    | 199596  | 556 | 18  | 678892  | 269492 | 0 | 0 | 0 | 0 | 50 | 35  | 16755496 | 1 | 1 |
| PRR19    | 792230  | 218 | 42  | 861520  | 292988 | 0 | 0 | 0 | 0 | 50 | 65  | 24510600 | 1 | 1 |
| PRR20A   | NaN     | NaN | NaN | 2680680 | 918480 | 0 | 0 | 0 | 0 | 5  | 8   | 3290508  | 1 | 1 |
| PRR20B   | NaN     | NaN | NaN | 2680680 | 918480 | 0 | 0 | 0 | 0 | 5  | 8   | 3290508  | 1 | 1 |
| PRR20C   | NaN     | NaN | NaN | 2680680 | 918480 | 0 | 0 | 0 | 0 | 5  | 8   | 3290508  | 1 | 1 |
| PRR20D   | NaN     | NaN | NaN | 2680680 | 918480 | 0 | 0 | 0 | 0 | 5  | 8   | 3290508  | 1 | 1 |
| PRR20E   | NaN     | NaN | NaN | 2680680 | 918480 | 0 | 0 | 0 | 0 | 5  | 8   | 3290508  | 1 | 1 |
| PRR23C   | NaN     | NaN | NaN | 624780  | 217872 | 0 | 0 | 0 | 0 | 50 | 116 | 39863456 | 1 | 1 |
| PRR24    | NaN     | NaN | NaN | 328232  | 132076 | 0 | 0 | 0 | 0 | 50 | 116 | 39777660 | 1 | 1 |
| PRRG1    | 81601   | NaN | 3   | 628340  | 171592 | 0 | 0 | 1 | 0 | 50 | 74  | 27381740 | 1 | 1 |
| PRRT4    | NaN     | NaN | NaN | 2136712 | 763976 | 0 | 0 | 0 | 0 | 7  | 14  | 4452136  | 1 | 1 |
| PRSS2    | NaN     | NaN | NaN | 338912  | 101104 | 0 | 0 | 0 | 0 | 50 | 116 | 39746688 | 1 | 1 |
| PRSS22   | 1537882 | 210 | 47  | 793524  | 248844 | 0 | 0 | 0 | 0 | 50 | 56  | 20433332 | 1 | 1 |
| PRSS23   | 230637  | 198 | -7  | 960132  | 274476 | 0 | 0 | 1 | 0 | 50 | 48  | 20491360 | 1 | 1 |
| PRSS37   | 199781  | 856 | -13 | 613388  | 159844 | 0 | 0 | 0 | 0 | 50 | 63  | 22945624 | 1 | 1 |
| PRSS38   | 672760  | 406 | 5   | 813104  | 251692 | 0 | 0 | 1 | 0 | 50 | 43  | 16613096 | 1 | 1 |
| PRSS41   | NaN     | NaN | NaN | 788184  | 249912 | 0 | 0 | 0 | 0 | 50 | 116 | 39895496 | 1 | 1 |
| PRSS55   | 78691   | 633 | 3   | 895696  | 256676 | 0 | 0 | 0 | 0 | 50 | 43  | 20021796 | 1 | 1 |
| PRSS8    | 1296884 | 351 | 35  | 858672  | 264864 | 0 | 0 | 2 | 0 | 12 | 24  | 6411204  | 1 | 1 |
| PRSSL1   | 1832767 | 218 | 10  | 693844  | 235316 | 0 | 0 | 0 | 0 | 29 | 50  | 17004696 | 1 | 1 |
| PRTFDC1  | 164255  | 142 | 18  | 613744  | 146672 | 0 | 0 | 1 | 0 | 31 | 26  | 11572492 | 1 | 1 |
| PRY      | NaN     | NaN | NaN | 765400  | 208616 | 0 | 0 | 0 | 0 | 50 | 116 | 39854200 | 1 | 1 |
| PRY2     | NaN     | NaN | NaN | 765400  | 208616 | 0 | 0 | 0 | 0 | 50 | 116 | 39854200 | 1 | 1 |
| PSCA     | 384374  | 412 | 23  | 294412  | 84728  | 0 | 0 | 1 | 0 | 4  | 5   | 1087224  | 1 | 1 |
| PSENEEN  | 1151198 | 321 | 30  | 267356  | 72268  | 0 | 0 | 1 | 0 | 4  | 5   | 1817736  | 1 | 1 |
| PSMD10   | 201673  | NaN | 25  | 585264  | 161268 | 0 | 0 | 1 | 0 | 50 | 59  | 19172380 | 1 | 1 |
| PSMD13   | 1463610 | 437 | 24  | 1074408 | 271272 | 0 | 0 | 0 | 0 | 6  | 2   | 2533652  | 1 | 1 |
| PSMD14   | 210764  | 520 | 13  | 831260  | 207904 | 0 | 0 | 0 | 0 | 50 | 67  | 22276700 | 1 | 1 |
| PSME2    | 974559  | 220 | 41  | 652904  | 163048 | 0 | 0 | 1 | 0 | 50 | 62  | 24565780 | 1 | 1 |
| PSMG3    | 547999  | 271 | 44  | 307584  | 95052  | 0 | 0 | 1 | 0 | 26 | 33  | 9317588  | 1 | 1 |
| PSMG4    | NaN     | NaN | NaN | 470988  | 135636 | 0 | 0 | 0 | 0 | 50 | 116 | 39781220 | 1 | 1 |
| PSORS1C2 | 3364017 | 401 | 19  | 333572  | 109648 | 0 | 0 | 1 | 0 | 4  | 9   | 1440732  | 1 | 1 |

|           |         |     |     |         |         |   |   |   |   |    |     |          |   |   |
|-----------|---------|-----|-----|---------|---------|---|---|---|---|----|-----|----------|---|---|
| PSTPIP1   | 327336  | 436 | 33  | 1107516 | 288360  | 0 | 0 | 2 | 0 | 28 | 31  | 11642624 | 1 | 1 |
| PTBP1     | 2041736 | 198 | 25  | 1433968 | 413672  | 0 | 0 | 2 | 0 | 50 | 82  | 22041028 | 1 | 1 |
| PTCRA     | 1086050 | 203 | 41  | 674976  | 243504  | 0 | 0 | 3 | 0 | 7  | 10  | 2401220  | 1 | 1 |
| PTGDS     | 1979517 | 188 | 34  | 499112  | 138484  | 0 | 0 | 1 | 0 | 16 | 30  | 5786424  | 1 | 1 |
| PTGES     | 600401  | 187 | 44  | 380208  | 120684  | 0 | 0 | 0 | 0 | 50 | 71  | 21419808 | 1 | 1 |
| PTGR1     | 499818  | 309 | 16  | 886796  | 242080  | 0 | 0 | 0 | 0 | 50 | 51  | 18603848 | 1 | 1 |
| PTP4A1    | 256545  | 154 | 15  | 454968  | 119616  | 0 | 0 | 0 | 0 | 50 | 40  | 18105804 | 1 | 1 |
| PTPLA     | 488883  | 383 | 4   | 744040  | 209684  | 0 | 0 | 0 | 0 | 50 | 41  | 18269564 | 1 | 1 |
| PTPLAD1   | 602545  | 187 | 27  | 964760  | 241012  | 0 | 0 | 0 | 0 | 13 | 14  | 6055560  | 1 | 1 |
| PTPLAD2   | 144026  | 601 | 5   | 619084  | 155216  | 0 | 0 | 0 | 0 | 50 | 56  | 18608832 | 1 | 1 |
| PTPLB     | 306542  | 274 | 38  | 657176  | 187612  | 0 | 0 | 0 | 0 | 50 | 54  | 17275612 | 1 | 1 |
| PTPN18    | 369510  | 593 | 29  | 1188684 | 350304  | 0 | 0 | 1 | 0 | 4  | 3   | 1551092  | 1 | 1 |
| PTPN20A   | NaN     | NaN | NaN | 2286232 | 511928  | 0 | 0 | 0 | 0 | 9  | 16  | 4869368  | 1 | 1 |
| PTPN20B   | 157964  | 642 | 23  | 2286232 | 511928  | 0 | 0 | 0 | 0 | 16 | 18  | 8077284  | 1 | 1 |
| PTPRCAP   | 1392213 | 215 | 53  | 490568  | 179068  | 0 | 0 | 1 | 0 | 50 | 41  | 15455384 | 1 | 1 |
| PTPRQ     | NaN     | NaN | NaN | 5526188 | 1467076 | 0 | 0 | 0 | 0 | 0  | 0   | 1467076  | 1 | 1 |
| PTS       | 383407  | 362 | 9   | 396228  | 95052   | 0 | 0 | 0 | 0 | 50 | 54  | 24713876 | 1 | 1 |
| PTTG2     | NaN     | NaN | NaN | 471344  | 142756  | 0 | 0 | 0 | 0 | 50 | 116 | 39788340 | 1 | 1 |
| PVRIG     | 1465817 | 204 | 59  | 789964  | 274832  | 0 | 0 | 1 | 0 | 50 | 49  | 18736636 | 1 | 1 |
| PWP2      | 879237  | 219 | 61  | 2363840 | 671416  | 0 | 0 | 0 | 0 | 5  | 2   | 2802432  | 1 | 1 |
| PYY       | 920082  | 241 | 29  | 245284  | 79388   | 0 | 0 | 0 | 0 | 50 | 50  | 17463580 | 1 | 1 |
| ProSAPiP1 | 909603  | 255 | 55  | 1625496 | 542544  | 0 | 0 | 0 | 0 | 4  | 7   | 2147036  | 1 | 1 |
| R3HCC1    | NaN     | NaN | NaN | 640800  | 190104  | 0 | 0 | 0 | 0 | 50 | 116 | 39835688 | 1 | 1 |
| RAB11FIP2 | 1422744 | 207 | 37  | 1929164 | 569956  | 0 | 0 | 1 | 0 | 50 | 84  | 28578612 | 1 | 1 |
| RAB15     | 521616  | 387 | 35  | 551088  | 146316  | 0 | 0 | 0 | 0 | 50 | 69  | 21146044 | 1 | 1 |
| RAB17     | 492799  | 440 | 11  | 550020  | 153792  | 0 | 0 | 0 | 0 | 50 | 68  | 23707108 | 1 | 1 |
| RAB1A     | 640694  | 343 | 41  | 541476  | 139908  | 0 | 0 | 0 | 0 | 50 | 54  | 22755520 | 1 | 1 |
| RAB27B    | 105818  | 372 | -13 | 576720  | 146316  | 0 | 0 | 1 | 0 | 3  | 7   | 1585624  | 1 | 1 |
| RAB2A     | 234041  | 512 | 24  | 572092  | 140264  | 0 | 0 | 0 | 0 | 50 | 49  | 20263520 | 1 | 1 |
| RAB2B     | 707390  | 470 | 30  | 580280  | 149164  | 0 | 0 | 1 | 0 | 31 | 43  | 15582120 | 1 | 1 |
| RAB33B    | 392237  | 299 | 32  | 582416  | 158776  | 0 | 0 | 2 | 0 | 8  | 11  | 3821660  | 1 | 1 |
| RAB35     | 1564246 | 225 | 45  | 558564  | 110004  | 0 | 0 | 0 | 0 | 50 | 65  | 21843804 | 1 | 1 |
| RAB39     | 421657  | 536 | 15  | 546816  | 158064  | 0 | 0 | 0 | 0 | 50 | 52  | 19313356 | 1 | 1 |



|         |         |     |     |         |         |   |   |   |   |    |     |          |   |   |
|---------|---------|-----|-----|---------|---------|---|---|---|---|----|-----|----------|---|---|
| RAB40C  | 1115707 | 213 | 39  | 724104  | 205056  | 0 | 0 | 2 | 0 | 0  | 2   | 205056   | 1 | 1 |
| RAB41   | 215874  | NaN | 52  | 597012  | 146316  | 0 | 0 | 0 | 0 | 50 | 56  | 22682540 | 1 | 1 |
| RAB43   | 1142757 | 352 | 44  | 537560  | 153436  | 0 | 0 | 2 | 0 | 4  | 6   | 1197228  | 1 | 1 |
| RAB4A   | 285692  | 361 | 9   | 582772  | 148808  | 0 | 0 | 0 | 0 | 50 | 71  | 23765848 | 1 | 1 |
| RAB7A   | 1090310 | 277 | 54  | 547172  | 140620  | 0 | 0 | 1 | 0 | 6  | 5   | 1515848  | 1 | 1 |
| RAB7L1  | 717622  | 377 | 37  | 534000  | 136704  | 0 | 0 | 0 | 0 | 50 | 68  | 25178456 | 1 | 1 |
| RABL5   | 838595  | 278 | 46  | 498400  | 119972  | 0 | 0 | 0 | 0 | 50 | 76  | 26049944 | 1 | 1 |
| RAC2    | 845055  | 230 | 67  | 500180  | 143824  | 0 | 0 | 1 | 0 | 1  | 1   | 490212   | 1 | 1 |
| RAD21L1 | NaN     | NaN | NaN | 1492352 | 349948  | 0 | 0 | 0 | 0 | 50 | 116 | 39995532 | 1 | 1 |
| RAD51L1 | 446885  | 404 | 37  | 1026704 | 290140  | 0 | 0 | 0 | 0 | 50 | 82  | 23472148 | 1 | 1 |
| RAD51L3 | 516190  | 504 | 23  | 972948  | 315060  | 0 | 0 | 0 | 0 | 50 | 59  | 21526608 | 1 | 1 |
| RAG1AP1 | 1801444 | 194 | 32  | 592740  | 142044  | 0 | 0 | 0 | 0 | 50 | 85  | 19936000 | 1 | 1 |
| RAGE    | 1531739 | 237 | 40  | 1101464 | 291208  | 0 | 0 | 0 | 0 | 50 | 73  | 25009356 | 1 | 1 |
| RALA    | 221320  | 445 | 20  | 545748  | 134568  | 0 | 0 | 0 | 0 | 50 | 65  | 22028924 | 1 | 1 |
| RAMP2   | 1633092 | 190 | 33  | 448204  | 130652  | 0 | 0 | 0 | 0 | 24 | 22  | 8134244  | 1 | 1 |
| RANGRF  | NaN     | NaN | NaN | 642936  | 150588  | 0 | 0 | 0 | 0 | 50 | 116 | 39796172 | 1 | 1 |
| RARRES2 | 315538  | 514 | 32  | 423996  | 122820  | 0 | 0 | 1 | 0 | 14 | 18  | 6003584  | 1 | 1 |
| RASA4   | NaN     | NaN | NaN | 2055900 | 607692  | 0 | 0 | 0 | 0 | 7  | 14  | 4295852  | 1 | 1 |
| RASD1   | 915530  | 220 | -3  | 707016  | 200784  | 0 | 0 | 0 | 0 | 50 | 67  | 16916408 | 1 | 1 |
| RASL11A | 284055  | 265 | 46  | 608404  | 182984  | 0 | 0 | 0 | 0 | 50 | 59  | 21531948 | 1 | 1 |
| RAVER1  | 1802015 | 191 | 21  | 1843012 | 635816  | 0 | 0 | 1 | 0 | 11 | 17  | 6150612  | 1 | 1 |
| RAX     | 293564  | 549 | 20  | 826988  | 293344  | 0 | 0 | 0 | 0 | 50 | 49  | 26609220 | 1 | 1 |
| RBM11   | 99517   | 964 | -30 | 734428  | 188324  | 0 | 0 | 1 | 0 | 50 | 92  | 21719560 | 1 | 1 |
| RBM16   | 146505  | 412 | 17  | 3228920 | 927736  | 0 | 0 | 0 | 0 | 3  | 5   | 2098620  | 1 | 1 |
| RBM20   | NaN     | NaN | NaN | 3097200 | 894984  | 0 | 0 | 0 | 0 | 5  | 8   | 3267012  | 1 | 1 |
| RBM3    | 817501  | NaN | 29  | 419012  | 112852  | 0 | 0 | 0 | 0 | 50 | 77  | 20781500 | 1 | 1 |
| RBM38   | 181292  | 604 | 9   | 398720  | 127804  | 0 | 0 | 1 | 0 | 7  | 2   | 2238172  | 1 | 1 |
| RBM9    | 1264586 | 388 | -26 | 1247424 | 297972  | 0 | 0 | 0 | 0 | 50 | 61  | 20904320 | 1 | 1 |
| RBMXL3  | NaN     | NaN | NaN | 2636536 | 787472  | 0 | 0 | 0 | 0 | 7  | 14  | 4475632  | 1 | 1 |
| RBMY1A1 | NaN     | NaN | NaN | 3865092 | 1053048 | 0 | 0 | 0 | 0 | 0  | 0   | 1053048  | 1 | 1 |
| RBMY1B  | NaN     | NaN | NaN | 5153456 | 1404064 | 0 | 0 | 0 | 0 | 0  | 0   | 1404064  | 1 | 1 |
| RBMY1D  | NaN     | NaN | NaN | 5153456 | 1404064 | 0 | 0 | 0 | 0 | 0  | 0   | 1404064  | 1 | 1 |
| RBMY1F  | NaN     | NaN | NaN | 2579576 | 699184  | 0 | 0 | 0 | 0 | 7  | 14  | 4387344  | 1 | 1 |

|         |         |      |     |          |         |   |   |   |   |    |     |          |   |   |
|---------|---------|------|-----|----------|---------|---|---|---|---|----|-----|----------|---|---|
| RBMV1J  | NaN     | NaN  | NaN | 2579576  | 699184  | 0 | 0 | 0 | 0 | 7  | 14  | 4387344  | 1 | 1 |
| RBP5    | 2422791 | 224  | 38  | 358136   | 92560   | 0 | 0 | 0 | 0 | 50 | 48  | 17746956 | 1 | 1 |
| RBP7    | 744954  | 240  | 24  | 367036   | 80456   | 0 | 0 | 2 | 0 | 3  | 12  | 1418660  | 1 | 1 |
| RBPMS   | 473452  | 363  | 27  | 702032   | 200428  | 0 | 0 | 0 | 0 | 8  | 4   | 2161632  | 1 | 1 |
| RCAN3   | 470059  | 348  | 28  | 633324   | 159132  | 0 | 0 | 1 | 0 | 50 | 61  | 20596024 | 1 | 1 |
| RCC1    | NaN     | NaN  | NaN | 1156288  | 337844  | 0 | 0 | 1 | 0 | 50 | 117 | 39983428 | 1 | 1 |
| RCN3    | 2080142 | 210  | 41  | 844432   | 235316  | 0 | 0 | 1 | 0 | 50 | 75  | 21834192 | 1 | 1 |
| RCVRN   | 63518   | 366  | -41 | 521540   | 131008  | 0 | 0 | 0 | 0 | 50 | 79  | 20220088 | 1 | 1 |
| RD3     | 384781  | 399  | 5   | 490212   | 149520  | 0 | 0 | 1 | 0 | 50 | 53  | 21479972 | 1 | 1 |
| RDBP    | 2314693 | 203  | 34  | 985408   | 278036  | 0 | 0 | 0 | 0 | 50 | 60  | 23217608 | 1 | 1 |
| RDH11   | 479937  | 260  | 39  | 812036   | 237808  | 0 | 0 | 3 | 0 | 6  | 9   | 2430768  | 1 | 1 |
| RDH13   | 1125216 | 432  | -26 | 831616   | 257744  | 0 | 0 | 1 | 0 | 50 | 58  | 18866576 | 1 | 1 |
| RDH14   | 39949   | 1075 | -7  | 816664   | 267356  | 0 | 0 | 0 | 0 | 26 | 23  | 10458924 | 1 | 1 |
| RDH5    | 1814311 | 384  | 26  | 773944   | 265220  | 0 | 0 | 0 | 0 | 50 | 44  | 15945952 | 1 | 1 |
| REEP5   | 248831  | 340  | 44  | 498044   | 127804  | 0 | 0 | 1 | 0 | 7  | 9   | 2818452  | 1 | 1 |
| REG4    | 415110  | 581  | 26  | 625848   | 159132  | 0 | 0 | 0 | 0 | 50 | 55  | 20927460 | 1 | 1 |
| RELL1   | 137374  | 764  | 41  | 698472   | 200784  | 0 | 0 | 1 | 0 | 50 | 68  | 19642656 | 1 | 1 |
| RESP18  | NaN     | NaN  | NaN | 597368   | 161980  | 0 | 0 | 0 | 0 | 50 | 116 | 39807564 | 1 | 1 |
| RETN    | 688482  | 384  | 31  | 281240   | 80812   | 0 | 0 | 2 | 0 | 3  | 4   | 636172   | 1 | 1 |
| RETNLB  | 129526  | 941  | -3  | 290852   | 78676   | 0 | 0 | 0 | 0 | 50 | 77  | 20664376 | 1 | 1 |
| REXO1L1 | NaN     | NaN  | NaN | 3295136  | 1036672 | 0 | 0 | 0 | 0 | 0  | 0   | 1036672  | 1 | 1 |
| RFNG    | 3850694 | 197  | 34  | 829480   | 266288  | 0 | 0 | 0 | 0 | 25 | 26  | 10294096 | 1 | 1 |
| RFPL1   | 723458  | 203  | 35  | 794592   | 228552  | 0 | 0 | 3 | 0 | 0  | 3   | 228552   | 1 | 1 |
| RFPL3   | 413546  | 556  | -16 | 792456   | 230688  | 0 | 0 | 1 | 0 | 50 | 71  | 22153880 | 1 | 1 |
| RFPL4A  | NaN     | NaN  | NaN | 728020   | 201140  | 0 | 0 | 0 | 0 | 50 | 116 | 39846724 | 1 | 1 |
| RFX8    | NaN     | NaN  | NaN | 1244220  | 321468  | 0 | 0 | 0 | 0 | 50 | 116 | 39967052 | 1 | 1 |
| RG9MTD1 | 549735  | 614  | 11  | 1039520  | 259168  | 0 | 0 | 0 | 0 | 50 | 69  | 21364272 | 1 | 1 |
| RG9MTD2 | 331308  | 847  | 9   | 910648   | 212888  | 0 | 0 | 0 | 0 | 50 | 70  | 18591744 | 1 | 1 |
| RG9MTD3 | 489340  | 453  | 23  | 842296   | 207548  | 0 | 0 | 0 | 0 | 50 | 50  | 17617728 | 1 | 1 |
| RGNEF   | 279980  | 577  | 39  | 4499840  | 1203280 | 0 | 0 | 0 | 0 | 6  | 5   | 3195812  | 1 | 1 |
| RGPD5   | 341807  | 568  | 18  | 13830244 | 3682820 | 0 | 0 | 0 | 0 | 1  | 0   | 4205784  | 1 | 1 |
| RGPD6   | 281803  | 568  | 17  | 9288752  | 2469928 | 0 | 0 | 0 | 0 | 0  | 0   | 2469928  | 1 | 1 |
| RGS13   | 306250  | 526  | -13 | 436812   | 92916   | 0 | 0 | 1 | 0 | 32 | 50  | 13827752 | 1 | 1 |

|          |         |     |     |         |         |   |   |   |   |    |     |          |   |   |
|----------|---------|-----|-----|---------|---------|---|---|---|---|----|-----|----------|---|---|
| RGS8     | 650082  | 702 | 23  | 548952  | 143112  | 0 | 0 | 1 | 0 | 24 | 18  | 10033860 | 1 | 1 |
| RGS9BP   | 380440  | 455 | -45 | 549308  | 206836  | 0 | 0 | 1 | 0 | 50 | 79  | 19821724 | 1 | 1 |
| RGSL1    | NaN     | NaN | NaN | 2850492 | 687792  | 0 | 0 | 0 | 0 | 7  | 14  | 4375952  | 1 | 1 |
| RHEBL1   | 1770671 | 214 | 65  | 489144  | 130296  | 0 | 0 | 1 | 0 | 1  | 4   | 468496   | 1 | 1 |
| RHOC     | 559669  | 325 | 27  | 499824  | 138840  | 0 | 0 | 0 | 0 | 50 | 65  | 23160292 | 1 | 1 |
| RHOD     | 1615307 | 162 | 47  | 538628  | 156640  | 0 | 0 | 2 | 0 | 5  | 12  | 2001788  | 1 | 1 |
| RHOF     | 826816  | 195 | 43  | 538984  | 159488  | 0 | 0 | 0 | 0 | 50 | 49  | 18963764 | 1 | 1 |
| RHOG     | 425863  | 258 | 23  | 472768  | 146672  | 0 | 0 | 0 | 0 | 50 | 55  | 19846644 | 1 | 1 |
| RIBC2    | 460724  | 199 | 8   | 993952  | 243860  | 0 | 0 | 1 | 0 | 50 | 68  | 20463236 | 1 | 1 |
| RICH2    | 91679   | 790 | -62 | 2109300 | 600216  | 0 | 0 | 0 | 0 | 15 | 12  | 6602376  | 1 | 1 |
| RILPL2   | 1129277 | 177 | 47  | 535780  | 156284  | 0 | 0 | 0 | 0 | 50 | 58  | 19591036 | 1 | 1 |
| RIMBP3B  | NaN     | NaN | NaN | 7932036 | 2577084 | 0 | 0 | 0 | 0 | 0  | 0   | 2577084  | 1 | 1 |
| RIMBP3C  | 572259  | 221 | 26  | 7932036 | 2577084 | 0 | 0 | 0 | 0 | 1  | 0   | 3128528  | 1 | 1 |
| RMND5B   | 821697  | 248 | 39  | 1015668 | 285156  | 0 | 0 | 3 | 0 | 0  | 3   | 285156   | 1 | 1 |
| RNASE11  | 637784  | 493 | 22  | 514776  | 130296  | 0 | 0 | 0 | 0 | 50 | 49  | 16434740 | 1 | 1 |
| RNASE12  | 637784  | 493 | 22  | 382700  | 95764   | 0 | 0 | 0 | 0 | 50 | 49  | 16434740 | 1 | 1 |
| RNASE2   | 1005555 | 429 | 4   | 410112  | 113208  | 0 | 0 | 0 | 0 | 50 | 67  | 17732716 | 1 | 1 |
| RNASE6   | 956361  | 577 | 8   | 385904  | 102172  | 0 | 0 | 0 | 0 | 50 | 92  | 23350396 | 1 | 1 |
| RNASE8   | 937278  | 320 | 20  | 384836  | 109648  | 0 | 0 | 0 | 0 | 50 | 63  | 19474980 | 1 | 1 |
| RNASEH2A | 1937827 | 226 | 32  | 771452  | 221788  | 0 | 0 | 0 | 0 | 50 | 71  | 21091932 | 1 | 1 |
| RNASEK   | 1696302 | 360 | 24  | 257388  | 68352   | 0 | 0 | 0 | 0 | 50 | 49  | 16256384 | 1 | 1 |
| RNASEN   | 191847  | 649 | -9  | 3616960 | 929516  | 0 | 0 | 0 | 0 | 12 | 16  | 7648660  | 1 | 1 |
| RND2     | 1507064 | 201 | 26  | 574940  | 172660  | 0 | 0 | 0 | 0 | 50 | 50  | 17618084 | 1 | 1 |
| RNF115   | 638533  | 230 | 36  | 799932  | 211464  | 0 | 0 | 1 | 0 | 50 | 57  | 21960928 | 1 | 1 |
| RNF122   | 91655   | 610 | 11  | 420080  | 101104  | 0 | 0 | 1 | 0 | 3  | 6   | 1552516  | 1 | 1 |
| RNF144B  | 322018  | 573 | -11 | 790676  | 213244  | 0 | 0 | 0 | 0 | 50 | 41  | 14789664 | 1 | 1 |
| RNF146   | 113326  | 889 | -6  | 884660  | 268780  | 0 | 0 | 0 | 0 | 50 | 63  | 21878692 | 1 | 1 |
| RNF151   | 1747301 | 183 | 46  | 618728  | 186544  | 0 | 0 | 0 | 0 | 50 | 75  | 19137492 | 1 | 1 |
| RNF160   | 316591  | 303 | 34  | 4697064 | 1237812 | 0 | 0 | 0 | 0 | 0  | 0   | 1237812  | 1 | 1 |
| RNF166   | 802673  | 189 | 41  | 617304  | 170880  | 0 | 0 | 0 | 0 | 50 | 65  | 20750172 | 1 | 1 |
| RNF187   | NaN     | NaN | NaN | 587044  | 181916  | 0 | 0 | 0 | 0 | 50 | 116 | 39827500 | 1 | 1 |
| RNF212   | 739370  | 247 | 43  | 818088  | 175152  | 0 | 0 | 0 | 0 | 1  | 1   | 331792   | 1 | 1 |
| RNF222   | NaN     | NaN | NaN | 526168  | 186188  | 0 | 0 | 0 | 0 | 50 | 116 | 39831772 | 1 | 1 |

|         |         |     |     |         |        |   |   |   |   |    |    |          |   |   |
|---------|---------|-----|-----|---------|--------|---|---|---|---|----|----|----------|---|---|
| RNF24   | 683635  | 170 | 33  | 459596  | 110716 | 0 | 0 | 0 | 0 | 50 | 60 | 21495636 | 1 | 1 |
| RNF32   | 299200  | 635 | -10 | 944824  | 252404 | 0 | 0 | 0 | 0 | 50 | 42 | 20786840 | 1 | 1 |
| ROBLD3  | 2005405 | 213 | 39  | 320400  | 96120  | 0 | 0 | 0 | 0 | 50 | 71 | 21768332 | 1 | 1 |
| ROD1    | 510989  | 242 | 31  | 1431832 | 409400 | 0 | 0 | 0 | 0 | 5  | 3  | 1690288  | 1 | 1 |
| ROGDI   | 706891  | 195 | 33  | 754364  | 213244 | 0 | 0 | 1 | 0 | 50 | 50 | 19489932 | 1 | 1 |
| ROMO1   | 1423559 | 169 | 53  | 205768  | 59096  | 0 | 0 | 0 | 0 | 50 | 53 | 18644076 | 1 | 1 |
| ROPN1B  | 215425  | 583 | 27  | 549308  | 154504 | 0 | 0 | 1 | 0 | 1  | 1  | 268424   | 1 | 1 |
| RP2     | 705104  | NaN | 42  | 907800  | 233892 | 0 | 0 | 0 | 0 | 42 | 43 | 15994368 | 1 | 1 |
| RPA4    | 53531   | NaN | 36  | 653260  | 186188 | 0 | 0 | 1 | 0 | 50 | 53 | 21213684 | 1 | 1 |
| RPL12   | 784133  | 209 | 45  | 442508  | 119260 | 0 | 0 | 1 | 0 | 7  | 9  | 2007484  | 1 | 1 |
| RPL13A  | 2173457 | 290 | 44  | 532220  | 153436 | 0 | 0 | 0 | 0 | 50 | 67 | 19850560 | 1 | 1 |
| RPL14   | 195734  | 546 | 20  | 567820  | 155216 | 0 | 0 | 1 | 0 | 39 | 26 | 13865132 | 1 | 1 |
| RPL15   | 399346  | 319 | 6   | 514064  | 155572 | 0 | 0 | 0 | 0 | 50 | 53 | 22341848 | 1 | 1 |
| RPL17   | 236267  | 352 | 55  | 496976  | 123532 | 0 | 0 | 0 | 0 | 50 | 49 | 16950940 | 1 | 1 |
| RPL18   | 1597109 | 242 | 31  | 485228  | 150232 | 0 | 0 | 2 | 0 | 3  | 4  | 1095768  | 1 | 1 |
| RPL19   | 1426821 | 212 | 31  | 522608  | 134212 | 0 | 0 | 0 | 0 | 50 | 55 | 19657964 | 1 | 1 |
| RPL27   | 1507064 | 201 | 26  | 361696  | 96476  | 0 | 0 | 0 | 0 | 50 | 50 | 17618084 | 1 | 1 |
| RPL27A  | 338882  | 406 | 24  | 388752  | 105732 | 0 | 0 | 0 | 0 | 50 | 43 | 21578228 | 1 | 1 |
| RPL29   | 1045639 | 224 | 36  | 410112  | 115344 | 0 | 0 | 0 | 0 | 50 | 51 | 17801068 | 1 | 1 |
| RPL30   | 625892  | 272 | 35  | 314348  | 76540  | 0 | 0 | 0 | 0 | 50 | 58 | 22975884 | 1 | 1 |
| RPL35   | 1125524 | 207 | 41  | 318976  | 95408  | 0 | 0 | 1 | 0 | 2  | 2  | 446780   | 1 | 1 |
| RPL36AL | 563227  | 409 | -4  | 277324  | 71912  | 0 | 0 | 0 | 0 | 50 | 55 | 20194100 | 1 | 1 |
| RPL37A  | 590718  | 460 | 37  | 249200  | 65860  | 0 | 0 | 0 | 0 | 50 | 49 | 23263888 | 1 | 1 |
| RPL38   | 297367  | 535 | -8  | 199360  | 47348  | 0 | 0 | 0 | 0 | 50 | 41 | 19792532 | 1 | 1 |
| RPL39   | 762240  | NaN | 61  | 143112  | 34176  | 0 | 0 | 0 | 0 | 50 | 57 | 19802144 | 1 | 1 |
| RPL39L  | 475647  | 452 | 36  | 136704  | 34176  | 0 | 0 | 0 | 0 | 50 | 55 | 18333288 | 1 | 1 |
| RPL41   | 2878044 | 171 | 40  | 81880   | 14240  | 0 | 0 | 0 | 0 | 32 | 45 | 13371716 | 1 | 1 |
| RPL7A   | 1827885 | 416 | 28  | 692776  | 196868 | 0 | 0 | 1 | 0 | 50 | 47 | 17145316 | 1 | 1 |
| RPL9    | 648710  | 177 | 43  | 515132  | 132076 | 0 | 0 | 0 | 0 | 50 | 66 | 22117568 | 1 | 1 |
| RPLP1   | 307077  | 298 | 19  | 297260  | 86152  | 0 | 0 | 2 | 0 | 0  | 2  | 86152    | 1 | 1 |
| RPP14   | 596733  | 221 | 40  | 332148  | 89712  | 0 | 0 | 1 | 0 | 0  | 1  | 89712    | 1 | 1 |
| RPP21   | 2023315 | 430 | 29  | 406196  | 111784 | 0 | 0 | 0 | 0 | 50 | 50 | 19288792 | 1 | 1 |
| RPP25   | 792240  | 199 | 45  | 471700  | 169100 | 0 | 0 | 2 | 0 | 1  | 2  | 284444   | 1 | 1 |

|          |         |     |     |         |        |   |   |   |   |    |     |          |   |   |
|----------|---------|-----|-----|---------|--------|---|---|---|---|----|-----|----------|---|---|
| RPRML    | 618151  | 366 | 28  | 284088  | 103596 | 0 | 0 | 4 | 0 | 1  | 5   | 286580   | 1 | 1 |
| RPS10    | 892621  | 233 | 25  | 433964  | 119260 | 0 | 0 | 0 | 0 | 50 | 50  | 16023560 | 1 | 1 |
| RPS14    | 1087686 | 188 | 71  | 388040  | 118192 | 0 | 0 | 0 | 0 | 50 | 45  | 17687504 | 1 | 1 |
| RPS15A   | 728854  | 279 | 21  | 348524  | 90424  | 0 | 0 | 0 | 0 | 50 | 67  | 24093012 | 1 | 1 |
| RPS16    | 1410725 | 230 | 39  | 377360  | 114988 | 0 | 0 | 1 | 0 | 1  | 1   | 627984   | 1 | 1 |
| RPS19BP1 | 721040  | 467 | 72  | 345676  | 106088 | 0 | 0 | 2 | 0 | 1  | 5   | 353508   | 1 | 1 |
| RPS21    | 1190359 | 252 | 33  | 234604  | 58028  | 0 | 0 | 0 | 0 | 50 | 49  | 16039936 | 1 | 1 |
| RPS23    | 146308  | 572 | 30  | 371308  | 105020 | 0 | 0 | 0 | 0 | 50 | 51  | 20418024 | 1 | 1 |
| RPS24    | 361024  | 184 | 30  | 777860  | 214312 | 0 | 0 | 0 | 0 | 5  | 9   | 2785344  | 1 | 1 |
| RPS25    | 1457410 | 180 | 55  | 340336  | 89000  | 0 | 0 | 0 | 0 | 50 | 46  | 18727024 | 1 | 1 |
| RPS27    | 2028800 | 222 | 34  | 234604  | 54824  | 0 | 0 | 1 | 0 | 19 | 26  | 5582792  | 1 | 1 |
| RPS27L   | 451944  | 230 | 36  | 231400  | 53756  | 0 | 0 | 0 | 0 | 50 | 52  | 20650492 | 1 | 1 |
| RPS29    | 563227  | 409 | -4  | 196868  | 45568  | 0 | 0 | 0 | 0 | 50 | 55  | 20194100 | 1 | 1 |
| RPS3     | 587975  | 205 | 39  | 619084  | 190460 | 0 | 0 | 0 | 0 | 50 | 62  | 20480680 | 1 | 1 |
| RQCD1    | 939398  | 179 | 48  | 764688  | 225348 | 0 | 0 | 1 | 0 | 33 | 45  | 15865852 | 1 | 1 |
| RRP7A    | 969686  | 196 | 65  | 722324  | 205768 | 0 | 0 | 2 | 0 | 18 | 15  | 5362428  | 1 | 1 |
| RS1      | 65885   | NaN | 26  | 592028  | 152368 | 0 | 0 | 0 | 0 | 50 | 65  | 19781140 | 1 | 1 |
| RSL24D1  | 195231  | 721 | -36 | 454968  | 91848  | 0 | 0 | 0 | 0 | 50 | 97  | 26051724 | 1 | 1 |
| RSPH9    | 1626879 | 278 | 43  | 707016  | 201852 | 0 | 0 | 0 | 0 | 50 | 72  | 24531960 | 1 | 1 |
| RSPO3    | 106114  | 826 | -9  | 720900  | 170880 | 0 | 0 | 0 | 0 | 50 | 56  | 17887932 | 1 | 1 |
| RSPO4    | 779522  | 586 | 27  | 602352  | 169812 | 0 | 0 | 1 | 0 | 50 | 82  | 26677928 | 1 | 1 |
| RTBDN    | 1937827 | 226 | 32  | 656820  | 208260 | 0 | 0 | 0 | 0 | 50 | 71  | 21091932 | 1 | 1 |
| RTCD1    | 333324  | 526 | 7   | 987188  | 277324 | 0 | 0 | 0 | 0 | 50 | 49  | 19790752 | 1 | 1 |
| RTDR1    | 223123  | 573 | 53  | 886796  | 259168 | 0 | 0 | 0 | 0 | 50 | 53  | 18614172 | 1 | 1 |
| RUFY4    | 671005  | 344 | 28  | 1463872 | 411536 | 0 | 0 | 1 | 0 | 17 | 14  | 7258128  | 1 | 1 |
| RUNDC2A  | 570118  | 441 | 51  | 981136  | 255608 | 0 | 0 | 0 | 0 | 50 | 88  | 25391344 | 1 | 1 |
| RWDD4A   | 150717  | 254 | -3  | 511572  | 119616 | 0 | 0 | 0 | 0 | 50 | 49  | 21644088 | 1 | 1 |
| S100A1   | NaN     | NaN | NaN | 249556  | 63368  | 0 | 0 | 0 | 0 | 50 | 116 | 39708952 | 1 | 1 |
| S100A10  | 769085  | 225 | 29  | 264152  | 58384  | 0 | 0 | 0 | 0 | 50 | 63  | 21033548 | 1 | 1 |
| S100A11  | 527465  | 349 | 35  | 273764  | 74404  | 0 | 0 | 0 | 0 | 50 | 62  | 21594604 | 1 | 1 |
| S100A12  | 1140044 | 401 | 32  | 243860  | 62656  | 0 | 0 | 0 | 0 | 50 | 58  | 17066640 | 1 | 1 |
| S100A13  | 1555611 | 183 | 33  | 262372  | 65504  | 0 | 0 | 3 | 0 | 0  | 3   | 65504    | 1 | 1 |
| S100A3   | 1454773 | 186 | 26  | 268424  | 66928  | 0 | 0 | 0 | 0 | 50 | 56  | 19376724 | 1 | 1 |

|          |         |     |     |         |        |   |   |   |   |    |     |          |   |   |
|----------|---------|-----|-----|---------|--------|---|---|---|---|----|-----|----------|---|---|
| S100A4   | 1454773 | 186 | 26  | 272340  | 63012  | 0 | 0 | 0 | 0 | 50 | 56  | 19376724 | 1 | 1 |
| S100A7L2 | 1140114 | 279 | 38  | 308296  | 66572  | 0 | 0 | 0 | 0 | 50 | 63  | 17848772 | 1 | 1 |
| S100A8   | 1140044 | 401 | 32  | 253472  | 58384  | 0 | 0 | 0 | 0 | 50 | 58  | 17066640 | 1 | 1 |
| S100B    | 530282  | 377 | 28  | 249912  | 55536  | 0 | 0 | 0 | 0 | 50 | 60  | 21149960 | 1 | 1 |
| S100P    | 501655  | 278 | 47  | 247420  | 66572  | 0 | 0 | 1 | 0 | 7  | 5   | 1681032  | 1 | 1 |
| S100Z    | 246938  | 418 | 21  | 269492  | 63724  | 0 | 0 | 1 | 0 | 2  | 2   | 343540   | 1 | 1 |
| S1PR3    | 248480  | 646 | 4   | 929160  | 285156 | 0 | 0 | 2 | 0 | 30 | 23  | 10629448 | 1 | 1 |
| SAA4     | 601955  | 371 | 17  | 345676  | 86864  | 0 | 0 | 0 | 0 | 50 | 58  | 21345760 | 1 | 1 |
| SAMD1    | 1023789 | 215 | 34  | 1048064 | 355288 | 0 | 0 | 1 | 0 | 50 | 55  | 16427620 | 1 | 1 |
| SAMD12   | 190644  | 575 | 17  | 540764  | 145960 | 0 | 0 | 0 | 0 | 50 | 35  | 16404480 | 1 | 1 |
| SAMD5    | 97528   | 850 | -17 | 424352  | 137416 | 0 | 0 | 0 | 0 | 50 | 73  | 23876564 | 1 | 1 |
| SAP25    | NaN     | NaN | NaN | 494128  | 165896 | 0 | 0 | 0 | 0 | 50 | 116 | 39811480 | 1 | 1 |
| SAP30L   | 581156  | 416 | 29  | 480244  | 122108 | 0 | 0 | 0 | 0 | 50 | 52  | 20192320 | 1 | 1 |
| SAPS1    | 1035412 | 209 | 5   | 2269856 | 654328 | 0 | 0 | 0 | 0 | 17 | 10  | 5854776  | 1 | 1 |
| SAPS2    | 960335  | 257 | 60  | 2395168 | 683876 | 0 | 0 | 0 | 0 | 0  | 0   | 683876   | 1 | 1 |
| SAPS3    | 832270  | 272 | 48  | 2376300 | 592740 | 0 | 0 | 0 | 0 | 16 | 16  | 5489164  | 1 | 1 |
| SAR1A    | 458949  | 217 | 39  | 527592  | 135636 | 0 | 0 | 0 | 0 | 50 | 34  | 16665428 | 1 | 1 |
| SAR1B    | 887915  | 177 | 46  | 527236  | 135992 | 0 | 0 | 1 | 0 | 50 | 63  | 20304460 | 1 | 1 |
| SARNP    | 1861663 | 256 | 32  | 577432  | 143468 | 0 | 0 | 0 | 0 | 50 | 59  | 21018240 | 1 | 1 |
| SART1    | 3854361 | 208 | 57  | 2057324 | 592384 | 0 | 0 | 1 | 0 | 6  | 2   | 2582780  | 1 | 1 |
| SASS6    | 292450  | 530 | 4   | 1737992 | 438592 | 0 | 0 | 0 | 0 | 34 | 41  | 15575000 | 1 | 1 |
| SAT1     | 491139  | NaN | 46  | 466004  | 106444 | 0 | 0 | 0 | 0 | 50 | 59  | 22607424 | 1 | 1 |
| SATL1    | 82752   | NaN | -16 | 1636532 | 408688 | 0 | 0 | 0 | 0 | 13 | 22  | 7121780  | 1 | 1 |
| SAV1     | 458995  | 259 | 31  | 980068  | 267356 | 0 | 0 | 0 | 0 | 50 | 64  | 19838100 | 1 | 1 |
| SBSN     | 1081638 | 390 | 41  | 1482028 | 426488 | 0 | 0 | 1 | 0 | 36 | 55  | 13682504 | 1 | 1 |
| SC4MOL   | 171541  | 540 | 6   | 781420  | 181916 | 0 | 0 | 0 | 0 | 50 | 65  | 21971252 | 1 | 1 |
| SC5DL    | 173979  | 744 | 28  | 781776  | 196512 | 0 | 0 | 0 | 0 | 50 | 58  | 21524828 | 1 | 1 |
| SC65     | 1760409 | 175 | 35  | 1118196 | 315060 | 0 | 0 | 0 | 0 | 35 | 50  | 15900028 | 1 | 1 |
| SCAMP1   | 222123  | 434 | 39  | 887152  | 232112 | 0 | 0 | 0 | 0 | 50 | 76  | 21837040 | 1 | 1 |
| SCAMP2   | 764533  | 195 | 46  | 846924  | 246708 | 0 | 0 | 1 | 0 | 15 | 22  | 5290516  | 1 | 1 |
| SCAND3   | 239465  | 576 | 27  | 3383424 | 877896 | 0 | 0 | 0 | 0 | 0  | 0   | 877896   | 1 | 1 |
| SCD5     | 740142  | 473 | 21  | 1007124 | 288360 | 0 | 0 | 0 | 0 | 50 | 67  | 18469992 | 1 | 1 |
| SCGB1A1  | 3053973 | 413 | 49  | 241724  | 63724  | 0 | 0 | 0 | 0 | 50 | 76  | 19971956 | 1 | 1 |

|         |         |     |     |         |        |   |   |   |   |    |     |          |   |   |
|---------|---------|-----|-----|---------|--------|---|---|---|---|----|-----|----------|---|---|
| SCGB1C1 | 1003496 | 437 | 11  | 250980  | 69420  | 0 | 0 | 0 | 0 | 50 | 55  | 15012164 | 1 | 1 |
| SCGB1D1 | 2778889 | 450 | 53  | 235316  | 66928  | 0 | 0 | 1 | 0 | 8  | 11  | 1470992  | 1 | 1 |
| SCGB1D4 | 3058870 | 450 | 42  | 218940  | 60876  | 0 | 0 | 0 | 0 | 50 | 51  | 16305156 | 1 | 1 |
| SCGB2A1 | 2778889 | 450 | 53  | 258812  | 59452  | 0 | 0 | 2 | 0 | 3  | 6   | 422928   | 1 | 1 |
| SCGB3A1 | 855370  | 515 | 13  | 254184  | 92916  | 0 | 0 | 0 | 0 | 50 | 68  | 19116844 | 1 | 1 |
| SCGB3A2 | 137041  | 470 | 2   | 238520  | 73336  | 0 | 0 | 0 | 0 | 50 | 55  | 18068068 | 1 | 1 |
| SCGBL   | 790899  | 512 | -33 | 251336  | 70132  | 0 | 0 | 0 | 0 | 50 | 60  | 18225064 | 1 | 1 |
| SCHIP1  | 94850   | 870 | -8  | 1261664 | 333928 | 0 | 0 | 0 | 0 | 50 | 83  | 29420552 | 1 | 1 |
| SCIN    | 119569  | 510 | -1  | 1869000 | 489144 | 0 | 0 | 1 | 0 | 50 | 63  | 21709236 | 1 | 1 |
| SCO2    | 1075525 | 207 | 42  | 646140  | 215736 | 0 | 0 | 3 | 0 | 2  | 6   | 852264   | 1 | 1 |
| SCOC    | 186461  | 708 | 3   | 484872  | 123888 | 0 | 0 | 0 | 0 | 50 | 57  | 19551520 | 1 | 1 |
| SCRN1   | 549429  | 560 | 23  | 1132436 | 295480 | 0 | 0 | 0 | 0 | 34 | 24  | 13509132 | 1 | 1 |
| SCRT2   | 622277  | 480 | 42  | 749024  | 242080 | 0 | 0 | 0 | 0 | 50 | 60  | 28148208 | 1 | 1 |
| SCT     | NaN     | NaN | NaN | 298684  | 107156 | 0 | 0 | 0 | 0 | 50 | 116 | 39752740 | 1 | 1 |
| SCXA    | NaN     | NaN | NaN | 965472  | 337488 | 0 | 0 | 0 | 0 | 50 | 116 | 39983072 | 1 | 1 |
| SCXB    | NaN     | NaN | NaN | 965472  | 337488 | 0 | 0 | 0 | 0 | 50 | 116 | 39983072 | 1 | 1 |
| SDC4    | 1005559 | 233 | 36  | 509792  | 147028 | 0 | 0 | 0 | 0 | 50 | 49  | 17548664 | 1 | 1 |
| SDCCAG1 | 661668  | 174 | 27  | 2904604 | 684944 | 0 | 0 | 0 | 0 | 2  | 0   | 1470636  | 1 | 1 |
| SDF2    | 1651143 | 225 | 31  | 532932  | 156996 | 0 | 0 | 1 | 0 | 3  | 13  | 2353516  | 1 | 1 |
| SDF2L1  | 521773  | 194 | 37  | 548596  | 173372 | 0 | 0 | 0 | 0 | 50 | 70  | 19466792 | 1 | 1 |
| SDHD    | 389805  | 179 | 31  | 402992  | 124600 | 0 | 0 | 3 | 0 | 3  | 5   | 597724   | 1 | 1 |
| SEBOX   | 1405196 | 214 | 10  | 799932  | 220008 | 0 | 0 | 0 | 0 | 3  | 2   | 766468   | 1 | 1 |
| SEC61B  | 203560  | 410 | 37  | 246708  | 79032  | 0 | 0 | 0 | 0 | 50 | 60  | 20776872 | 1 | 1 |
| SEC61G  | 277856  | 325 | -11 | 189748  | 44144  | 0 | 0 | 0 | 0 | 50 | 41  | 18400216 | 1 | 1 |
| SELK    | 128709  | 552 | 39  | 256320  | 65148  | 0 | 0 | 0 | 0 | 50 | 59  | 17062012 | 1 | 1 |
| SELL    | 293592  | 597 | 13  | 1032756 | 238164 | 0 | 0 | 0 | 0 | 50 | 66  | 18679320 | 1 | 1 |
| SELM    | 731144  | 218 | 40  | 368104  | 118904 | 0 | 0 | 0 | 0 | 50 | 54  | 25122564 | 1 | 1 |
| SELS    | 372683  | 406 | 2   | 496976  | 139552 | 0 | 0 | 0 | 0 | 50 | 53  | 20605636 | 1 | 1 |
| SELT    | 370681  | 397 | 34  | 516556  | 134924 | 0 | 0 | 0 | 0 | 50 | 46  | 19851272 | 1 | 1 |
| SELV    | 1148741 | 322 | 25  | 821292  | 313992 | 0 | 0 | 1 | 0 | 23 | 18  | 9021752  | 1 | 1 |
| 15-Sep  | 333484  | 410 | -6  | 446424  | 102528 | 0 | 0 | 0 | 0 | 50 | 56  | 20168824 | 1 | 1 |
| 1-Sep   | 2312884 | 165 | 47  | 964404  | 261660 | 0 | 0 | 0 | 0 | 50 | 59  | 19035320 | 1 | 1 |
| 10-Sep  | 191347  | 329 | 22  | 1211824 | 288716 | 0 | 0 | 0 | 0 | 50 | 51  | 19327596 | 1 | 1 |

|           |         |     |     |         |         |   |   |   |   |    |     |          |   |   |
|-----------|---------|-----|-----|---------|---------|---|---|---|---|----|-----|----------|---|---|
| 11-Sep    | 402678  | 462 | 39  | 1142760 | 273408  | 0 | 0 | 0 | 0 | 50 | 74  | 20914288 | 1 | 1 |
| 12-Sep    | 706891  | 195 | 33  | 929160  | 259524  | 0 | 0 | 0 | 0 | 50 | 50  | 19489932 | 1 | 1 |
| 14-Sep    | 841217  | 627 | -10 | 1155220 | 270560  | 0 | 0 | 0 | 0 | 50 | 155 | 25723492 | 1 | 1 |
| 2-Sep     | 1242448 | 383 | 24  | 969388  | 241724  | 0 | 0 | 0 | 0 | 50 | 71  | 21719916 | 1 | 1 |
| 3-Sep     | 1335011 | 323 | 67  | 988256  | 247420  | 0 | 0 | 0 | 0 | 50 | 49  | 15999352 | 1 | 1 |
| 4-Sep     | 874267  | 376 | 16  | 1319336 | 358492  | 0 | 0 | 0 | 0 | 8  | 12  | 3552168  | 1 | 1 |
| 5-Sep     | 728313  | 211 | 8   | 989324  | 243148  | 0 | 0 | 0 | 0 | 50 | 70  | 22450784 | 1 | 1 |
| 6-Sep     | 656561  | NaN | 61  | 1161984 | 293700  | 0 | 0 | 0 | 0 | 6  | 2   | 2085092  | 1 | 1 |
| 7-Sep     | 355149  | 577 | 33  | 1185124 | 267356  | 0 | 0 | 0 | 0 | 30 | 41  | 17890424 | 1 | 1 |
| 8-Sep     | 717720  | 356 | 59  | 1378788 | 336420  | 0 | 0 | 0 | 0 | 40 | 33  | 14637296 | 1 | 1 |
| 9-Sep     | 673808  | 391 | 24  | 1882172 | 545392  | 0 | 0 | 0 | 0 | 0  | 0   | 545392   | 1 | 1 |
| SEPW1     | 812020  | 262 | 36  | 241368  | 61944   | 0 | 0 | 1 | 0 | 3  | 9   | 1472416  | 1 | 1 |
| SEPX1     | 1766472 | 214 | 39  | 310432  | 77252   | 0 | 0 | 0 | 0 | 50 | 74  | 24152108 | 1 | 1 |
| SERF1A    | NaN     | NaN | NaN | 717696  | 170880  | 0 | 0 | 0 | 0 | 50 | 116 | 39816464 | 1 | 1 |
| SERF1B    | NaN     | NaN | NaN | 717696  | 170880  | 0 | 0 | 0 | 0 | 50 | 116 | 39816464 | 1 | 1 |
| SERF2     | 784327  | 286 | 37  | 168744  | 34176   | 0 | 0 | 0 | 0 | 50 | 69  | 23862324 | 1 | 1 |
| SERINC4   | 784327  | 286 | 37  | 719120  | 200428  | 0 | 0 | 1 | 0 | 50 | 69  | 23862324 | 1 | 1 |
| SERP2     | 190099  | 161 | 43  | 178000  | 42008   | 0 | 0 | 0 | 0 | 50 | 61  | 17683944 | 1 | 1 |
| SERPINB1  | 469210  | 229 | 37  | 984340  | 258812  | 0 | 0 | 0 | 0 | 50 | 42  | 19101536 | 1 | 1 |
| SERPINB1  | 190401  | 339 | 20  | 1059812 | 264508  | 0 | 0 | 0 | 0 | 50 | 49  | 19965548 | 1 | 1 |
| SETD1B    | NaN     | NaN | NaN | 4721984 | 1513000 | 0 | 0 | 0 | 0 | 0  | 0   | 1513000  | 1 | 1 |
| SF3A2     | 1603571 | 240 | 27  | 1145964 | 378072  | 0 | 0 | 1 | 0 | 50 | 66  | 21932448 | 1 | 1 |
| SF3B14    | 243145  | 226 | 33  | 334640  | 81880   | 0 | 0 | 0 | 0 | 50 | 59  | 18078748 | 1 | 1 |
| SF4       | 930697  | 232 | 10  | 1685304 | 442152  | 0 | 0 | 0 | 0 | 9  | 7   | 4173032  | 1 | 1 |
| SFRP5     | 555867  | 209 | 33  | 794236  | 233180  | 0 | 0 | 3 | 0 | 3  | 4   | 1045216  | 1 | 1 |
| SFRS1     | 854628  | 182 | 27  | 663584  | 202564  | 0 | 0 | 0 | 0 | 50 | 49  | 18253544 | 1 | 1 |
| SFRS11    | 296676  | 445 | -11 | 1243152 | 362052  | 0 | 0 | 0 | 0 | 50 | 48  | 19751948 | 1 | 1 |
| SFRS12    | 388631  | 437 | 33  | 1616240 | 433252  | 0 | 0 | 0 | 0 | 20 | 23  | 9134960  | 1 | 1 |
| SFRS12IP1 | 81822   | 632 | -1  | 434320  | 82592   | 0 | 0 | 0 | 0 | 50 | 53  | 21422300 | 1 | 1 |
| SFRS13A   | NaN     | NaN | NaN | 737276  | 196156  | 0 | 0 | 0 | 0 | 50 | 116 | 39841740 | 1 | 1 |
| SFRS13B   | 376032  | 446 | 27  | 665720  | 190816  | 0 | 0 | 0 | 0 | 21 | 15  | 11169500 | 1 | 1 |
| SFRS14    | 1327004 | 215 | 24  | 2730520 | 779996  | 0 | 0 | 0 | 0 | 0  | 0   | 779996   | 1 | 1 |
| SFRS15    | 291511  | 621 | 26  | 2899264 | 860096  | 0 | 0 | 0 | 0 | 5  | 5   | 2599512  | 1 | 1 |



|          |         |      |     |         |         |   |   |   |   |    |     |          |   |   |
|----------|---------|------|-----|---------|---------|---|---|---|---|----|-----|----------|---|---|
| SFRS16   | 1135715 | 208  | 25  | 1746536 | 501604  | 0 | 0 | 0 | 0 | 7  | 11  | 2611260  | 1 | 1 |
| SFRS17A  | NaN     | NaN  | NaN | 1741196 | 505876  | 0 | 0 | 0 | 0 | 9  | 16  | 4863316  | 1 | 1 |
| SFRS18   | 259457  | 638  | 13  | 2111792 | 513352  | 0 | 0 | 0 | 0 | 4  | 11  | 6783936  | 1 | 1 |
| SFRS2    | 827288  | 206  | 22  | 525456  | 190104  | 0 | 0 | 0 | 0 | 50 | 41  | 14517680 | 1 | 1 |
| SFRS2B   | 273779  | 513  | 16  | 657888  | 245640  | 0 | 0 | 0 | 0 | 50 | 67  | 22599236 | 1 | 1 |
| SFRS2IP  | 817865  | 602  | 11  | 3760784 | 989680  | 0 | 0 | 0 | 0 | 0  | 0   | 989680   | 1 | 1 |
| SFRS3    | 889664  | 178  | 40  | 423996  | 126024  | 0 | 0 | 0 | 0 | 50 | 67  | 21004000 | 1 | 1 |
| SFRS4    | 494473  | 235  | 21  | 1260240 | 347100  | 0 | 0 | 0 | 0 | 16 | 10  | 5736940  | 1 | 1 |
| SFRS5    | 610490  | 333  | 47  | 704880  | 199716  | 0 | 0 | 0 | 0 | 50 | 50  | 20003640 | 1 | 1 |
| SFRS6    | 316530  | 559  | -45 | 865080  | 261660  | 0 | 0 | 0 | 0 | 35 | 63  | 15111488 | 1 | 1 |
| SFRS7    | 850854  | 184  | 26  | 605200  | 190460  | 0 | 0 | 0 | 0 | 50 | 52  | 18448988 | 1 | 1 |
| SFRS8    | 364490  | 367  | 7   | 2426852 | 695980  | 0 | 0 | 0 | 0 | 3  | 3   | 2104672  | 1 | 1 |
| SFRS9    | 1563159 | 216  | 45  | 562124  | 161980  | 0 | 0 | 0 | 0 | 50 | 63  | 22226860 | 1 | 1 |
| SFT2D1   | 199596  | 556  | 18  | 431116  | 113564  | 0 | 0 | 0 | 0 | 50 | 35  | 16755496 | 1 | 1 |
| SFT2D3   | NaN     | NaN  | NaN | 482736  | 209328  | 0 | 0 | 0 | 0 | 50 | 116 | 39854912 | 1 | 1 |
| SFTPA1   | 478276  | NaN  | 11  | 678180  | 192240  | 0 | 0 | 3 | 0 | 1  | 4   | 380208   | 1 | 1 |
| SFTPD    | 570627  | 613  | 29  | 940908  | 293700  | 0 | 0 | 0 | 0 | 50 | 62  | 22394892 | 1 | 1 |
| SGCD     | 48800   | 1181 | 3   | 812036  | 229264  | 0 | 0 | 2 | 0 | 3  | 3   | 814884   | 1 | 1 |
| SGCG     | 189677  | 771  | -4  | 756856  | 206480  | 0 | 0 | 0 | 0 | 50 | 43  | 24303408 | 1 | 1 |
| SGEF     | 94659   | 975  | -13 | 2041660 | 583484  | 0 | 0 | 0 | 0 | 6  | 8   | 4783216  | 1 | 1 |
| SGK196   | 304258  | 559  | 12  | 884304  | 248844  | 0 | 0 | 0 | 0 | 50 | 59  | 21217244 | 1 | 1 |
| SGK269   | 311464  | 502  | 30  | 4367052 | 1243152 | 0 | 0 | 0 | 0 | 2  | 3   | 2292284  | 1 | 1 |
| SGSH     | 674340  | 219  | 22  | 1268428 | 377360  | 0 | 0 | 1 | 0 | 36 | 55  | 18118976 | 1 | 1 |
| SGTA     | 1354357 | 291  | 25  | 837668  | 215380  | 0 | 0 | 0 | 0 | 50 | 54  | 21517708 | 1 | 1 |
| SH2B2    | 574073  | 361  | 45  | 1442156 | 475972  | 0 | 0 | 1 | 0 | 3  | 5   | 2755084  | 1 | 1 |
| SH3BGRL  | 137219  | NaN  | -22 | 304024  | 77252   | 0 | 0 | 1 | 0 | 17 | 28  | 5925620  | 1 | 1 |
| SH3BGRL2 | 205695  | 824  | 2   | 289072  | 69776   | 0 | 0 | 0 | 0 | 50 | 62  | 21965912 | 1 | 1 |
| SH3BGRL3 | 1021101 | 217  | 22  | 241368  | 68352   | 0 | 0 | 0 | 0 | 50 | 66  | 18554720 | 1 | 1 |
| SH3D20   | 748554  | 327  | 12  | 620152  | 229976  | 0 | 0 | 0 | 0 | 50 | 71  | 23705684 | 1 | 1 |
| SHISA4   | 736064  | 208  | 24  | 499824  | 151656  | 0 | 0 | 0 | 0 | 50 | 72  | 25735952 | 1 | 1 |
| SHISA6   | NaN     | NaN  | NaN | 1363124 | 426844  | 0 | 0 | 0 | 0 | 50 | 116 | 40072428 | 1 | 1 |
| SHISA7   | NaN     | NaN  | NaN | 1265580 | 474192  | 0 | 0 | 0 | 0 | 50 | 116 | 40119776 | 1 | 1 |
| SHISA9   | NaN     | NaN  | NaN | 1152728 | 338200  | 0 | 0 | 0 | 0 | 50 | 116 | 39983784 | 1 | 1 |

|          |         |     |     |         |        |   |   |   |   |    |     |          |   |   |
|----------|---------|-----|-----|---------|--------|---|---|---|---|----|-----|----------|---|---|
| SIAH1    | 170149  | 392 | 3   | 783200  | 227128 | 0 | 0 | 0 | 0 | 50 | 39  | 21914292 | 1 | 1 |
| SIAH3    | 820469  | 632 | 51  | 673552  | 197936 | 0 | 0 | 0 | 0 | 50 | 66  | 24211916 | 1 | 1 |
| SIGLEC15 | 384767  | 380 | 42  | 806696  | 268780 | 0 | 0 | 0 | 0 | 50 | 39  | 21640884 | 1 | 1 |
| SIGMAR1  | 731413  | 298 | 51  | 557496  | 175152 | 0 | 0 | 1 | 0 | 50 | 42  | 16261368 | 1 | 1 |
| SIK1     | 807666  | 312 | 65  | 1941980 | 625492 | 0 | 0 | 0 | 0 | 7  | 9   | 3077976  | 1 | 1 |
| SILV     | 2080397 | 229 | 31  | 1643296 | 522608 | 0 | 0 | 0 | 0 | 11 | 12  | 5452140  | 1 | 1 |
| SIP1     | 314287  | 166 | 3   | 747956  | 192952 | 0 | 0 | 0 | 0 | 50 | 56  | 19917132 | 1 | 1 |
| SIX6     | 325446  | 618 | 0   | 604488  | 191172 | 0 | 0 | 0 | 0 | 50 | 64  | 21583212 | 1 | 1 |
| SLAMF1   | 1160206 | 634 | 30  | 861520  | 240656 | 0 | 0 | 2 | 0 | 13 | 20  | 4124260  | 1 | 1 |
| SLBP     | 884891  | 350 | 36  | 719120  | 179068 | 0 | 0 | 0 | 0 | 50 | 73  | 24227224 | 1 | 1 |
| SLC13A1  | 99560   | 955 | -15 | 1533292 | 438236 | 0 | 0 | 2 | 0 | 14 | 28  | 7454996  | 1 | 1 |
| SLC15A5  | NaN     | NaN | NaN | 1478112 | 414384 | 0 | 0 | 0 | 0 | 50 | 116 | 40059968 | 1 | 1 |
| SLC16A11 | 1696302 | 360 | 24  | 1095768 | 431472 | 0 | 0 | 0 | 0 | 10 | 3   | 2758288  | 1 | 1 |
| SLC16A8  | 1478013 | 200 | 76  | 1191888 | 443220 | 0 | 0 | 0 | 0 | 8  | 10  | 2911368  | 1 | 1 |
| SLC1A3   | 376343  | 436 | 11  | 1386264 | 407976 | 0 | 0 | 1 | 0 | 50 | 58  | 21458968 | 1 | 1 |
| LC22A18A | 552601  | 256 | 34  | 622288  | 204344 | 0 | 0 | 0 | 0 | 50 | 59  | 21410552 | 1 | 1 |
| SLC22A20 | 3317462 | 168 | 54  | 865792  | 279104 | 0 | 0 | 0 | 0 | 50 | 56  | 19574304 | 1 | 1 |
| SLC22A24 | NaN     | NaN | NaN | 1388756 | 416164 | 0 | 0 | 1 | 0 | 50 | 117 | 40061748 | 1 | 1 |
| SLC22A5  | 543074  | 264 | 63  | 1400504 | 425776 | 0 | 0 | 0 | 0 | 20 | 15  | 7288744  | 1 | 1 |
| SLC24A6  | 441204  | 251 | 37  | 1468144 | 470276 | 0 | 0 | 0 | 0 | 19 | 12  | 6287672  | 1 | 1 |
| SLC25A10 | 3745109 | 205 | 30  | 739056  | 228552 | 0 | 0 | 1 | 0 | 33 | 25  | 10695308 | 1 | 1 |
| SLC25A21 | 68926   | 481 | -44 | 793168  | 210752 | 0 | 0 | 0 | 0 | 9  | 12  | 4318992  | 1 | 1 |
| SLC25A29 | 412002  | 237 | 37  | 726240  | 260592 | 0 | 0 | 2 | 0 | 23 | 21  | 8168064  | 1 | 1 |
| SLC25A32 | 430771  | 673 | 28  | 851908  | 240656 | 0 | 0 | 0 | 0 | 21 | 16  | 9275580  | 1 | 1 |
| SLC25A33 | 749351  | 268 | 33  | 815240  | 242080 | 0 | 0 | 3 | 0 | 6  | 11  | 1883596  | 1 | 1 |
| SLC25A37 | 474894  | 409 | 36  | 849772  | 249200 | 0 | 0 | 1 | 0 | 50 | 70  | 23889024 | 1 | 1 |
| SLC25A40 | 237024  | 758 | 6   | 901748  | 227128 | 0 | 0 | 1 | 0 | 50 | 75  | 26036772 | 1 | 1 |
| SLC26A1  | 675007  | 256 | 45  | 1737636 | 627984 | 0 | 0 | 0 | 0 | 5  | 6   | 3102896  | 1 | 1 |
| SLC26A2  | 1070181 | 149 | 44  | 1838740 | 540764 | 0 | 0 | 0 | 0 | 1  | 1   | 897832   | 1 | 1 |
| SLC31A1  | 437406  | 312 | 17  | 499824  | 129228 | 0 | 0 | 2 | 0 | 7  | 5   | 1034892  | 1 | 1 |
| SLC31A2  | 448462  | 456 | 9   | 366324  | 107868 | 0 | 0 | 0 | 0 | 50 | 64  | 19509512 | 1 | 1 |
| SLC35A2  | 834040  | NaN | 38  | 1117840 | 339980 | 0 | 0 | 1 | 0 | 50 | 43  | 14994364 | 1 | 1 |
| SLC35B4  | 286704  | 493 | 14  | 870420  | 231756 | 0 | 0 | 0 | 0 | 50 | 52  | 17857672 | 1 | 1 |

|          |         |      |     |         |        |   |   |   |   |    |     |          |   |   |
|----------|---------|------|-----|---------|--------|---|---|---|---|----|-----|----------|---|---|
| SLC35C1  | 431496  | 381  | 20  | 881456  | 292276 | 0 | 0 | 1 | 0 | 50 | 54  | 21067368 | 1 | 1 |
| SLC35D2  | 340302  | 400  | 21  | 880388  | 251692 | 0 | 0 | 0 | 0 | 50 | 49  | 24353960 | 1 | 1 |
| SLC35E1  | 815495  | 258  | 44  | 1014600 | 325740 | 0 | 0 | 2 | 0 | 15 | 13  | 6426868  | 1 | 1 |
| SLC35E2  | 1569768 | 214  | 33  | 1676048 | 527236 | 0 | 0 | 0 | 0 | 3  | 2   | 1529020  | 1 | 1 |
| SLC38A5  | 726793  | NaN  | 2   | 1226776 | 351728 | 0 | 0 | 0 | 0 | 24 | 24  | 10365296 | 1 | 1 |
| SLC7A13  | 192785  | 1147 | 3   | 1165188 | 358848 | 0 | 0 | 3 | 0 | 5  | 8   | 2516564  | 1 | 1 |
| SLC9A10  | 268687  | 508  | 22  | 3120696 | 773232 | 0 | 0 | 0 | 0 | 2  | 2   | 1977580  | 1 | 1 |
| SLC9A11  | 426813  | 335  | 9   | 2984348 | 735496 | 0 | 0 | 0 | 0 | 3  | 2   | 2078684  | 1 | 1 |
| SLC9A3R1 | 983414  | 484  | 17  | 899612  | 271984 | 0 | 0 | 0 | 0 | 0  | 0   | 271984   | 1 | 1 |
| SLFN14   | NaN     | NaN  | NaN | 2317204 | 623000 | 0 | 0 | 0 | 0 | 7  | 14  | 4311160  | 1 | 1 |
| SLN      | 322905  | 676  | -5  | 83660   | 23140  | 0 | 0 | 0 | 0 | 50 | 57  | 16410888 | 1 | 1 |
| SLPI     | 842540  | 324  | 25  | 353508  | 87576  | 0 | 0 | 0 | 0 | 50 | 49  | 22812836 | 1 | 1 |
| SLURP1   | 427585  | 373  | 34  | 270204  | 73692  | 0 | 0 | 1 | 0 | 12 | 11  | 4451424  | 1 | 1 |
| SMAD5    | 284497  | 449  | 34  | 1206128 | 305092 | 0 | 0 | 0 | 0 | 50 | 53  | 20837392 | 1 | 1 |
| SMAGP    | 494861  | 194  | 40  | 294056  | 59452  | 0 | 0 | 1 | 0 | 16 | 23  | 4828072  | 1 | 1 |
| SMCR7    | 925111  | 223  | 18  | 1201500 | 306516 | 0 | 0 | 0 | 0 | 46 | 58  | 19081600 | 1 | 1 |
| SMCR7L   | 766902  | 467  | 74  | 1135996 | 367748 | 0 | 0 | 0 | 0 | 1  | 3   | 615168   | 1 | 1 |
| SMN1     | NaN     | NaN  | NaN | 1541480 | 417232 | 0 | 0 | 0 | 0 | 50 | 116 | 40062816 | 1 | 1 |
| SMN2     | NaN     | NaN  | NaN | 1571384 | 423640 | 0 | 0 | 0 | 0 | 50 | 116 | 40069224 | 1 | 1 |
| SMPX     | 93024   | NaN  | 0   | 238164  | 64080  | 0 | 0 | 0 | 0 | 50 | 60  | 20571816 | 1 | 1 |
| SMUG1    | 798393  | 279  | 48  | 658600  | 218228 | 0 | 0 | 1 | 0 | 50 | 49  | 17808188 | 1 | 1 |
| SNAPC5   | 507061  | 219  | 40  | 263084  | 69064  | 0 | 0 | 0 | 0 | 50 | 40  | 15710992 | 1 | 1 |
| SNAPIN   | 1656449 | 183  | 40  | 341760  | 112140 | 0 | 0 | 0 | 0 | 50 | 74  | 21280612 | 1 | 1 |
| NHG3-RCC | 846521  | 183  | 26  | 1077256 | 313280 | 0 | 0 | 0 | 0 | 26 | 27  | 10005736 | 1 | 1 |
| SNN      | 602364  | 214  | 40  | 220720  | 68708  | 0 | 0 | 0 | 0 | 50 | 57  | 21732376 | 1 | 1 |
| SNRNP25  | 1005761 | 238  | 36  | 348880  | 94340  | 0 | 0 | 0 | 0 | 50 | 46  | 16624132 | 1 | 1 |
| SNRPF    | 426671  | 400  | 5   | 234960  | 56604  | 0 | 0 | 0 | 0 | 50 | 36  | 19949172 | 1 | 1 |
| SNRPG    | 671278  | 370  | 38  | 215380  | 46280  | 0 | 0 | 0 | 0 | 50 | 76  | 25574328 | 1 | 1 |
| SNUPN    | 594867  | 165  | 39  | 948384  | 242436 | 0 | 0 | 0 | 0 | 50 | 44  | 21001508 | 1 | 1 |
| SNURF    | 233460  | 1194 | -44 | 192952  | 52688  | 0 | 0 | 1 | 0 | 1  | 2   | 286936   | 1 | 1 |
| SNX24    | 154483  | 532  | 18  | 454968  | 115344 | 0 | 0 | 0 | 0 | 50 | 51  | 21559360 | 1 | 1 |
| SOCS1    | 632841  | 308  | 37  | 504096  | 179424 | 0 | 0 | 0 | 0 | 50 | 60  | 21937788 | 1 | 1 |
| SOCS2    | 359700  | 369  | 30  | 493060  | 148808 | 0 | 0 | 0 | 0 | 50 | 40  | 21698556 | 1 | 1 |

|         |         |      |     |         |        |   |   |   |   |    |     |          |   |   |
|---------|---------|------|-----|---------|--------|---|---|---|---|----|-----|----------|---|---|
| SOCS3   | 962609  | 209  | 27  | 550732  | 177644 | 0 | 0 | 1 | 0 | 50 | 76  | 22461464 | 1 | 1 |
| SOCS4   | 795059  | 144  | 37  | 1125672 | 291564 | 0 | 0 | 1 | 0 | 50 | 42  | 18424424 | 1 | 1 |
| SOD3    | 269537  | 617  | 31  | 582416  | 194020 | 0 | 0 | 0 | 0 | 8  | 6   | 2499476  | 1 | 1 |
| SOLH    | 1205944 | 213  | 38  | 2661812 | 867928 | 0 | 0 | 0 | 0 | 8  | 6   | 3183352  | 1 | 1 |
| SOST    | 1081050 | 192  | 35  | 524388  | 167676 | 0 | 0 | 0 | 0 | 50 | 58  | 18400572 | 1 | 1 |
| SOX11   | 10248   | 1198 | -17 | 1094344 | 323960 | 0 | 0 | 0 | 0 | 37 | 63  | 15382048 | 1 | 1 |
| SOX13   | 560073  | 314  | 31  | 1609832 | 440728 | 0 | 0 | 0 | 0 | 50 | 53  | 21764416 | 1 | 1 |
| SOX15   | 1957426 | 194  | 24  | 564260  | 189748 | 0 | 0 | 1 | 0 | 50 | 81  | 21975524 | 1 | 1 |
| SOX21   | 154313  | 759  | 41  | 661448  | 228196 | 0 | 0 | 0 | 0 | 50 | 63  | 18377076 | 1 | 1 |
| SP6     | 1071489 | 214  | 29  | 916344  | 295836 | 0 | 0 | 0 | 0 | 50 | 58  | 18849844 | 1 | 1 |
| SP9     | NaN     | NaN  | NaN | 1157356 | 400856 | 0 | 0 | 0 | 0 | 50 | 116 | 40046440 | 1 | 1 |
| SPACA4  | 1597109 | 242  | 31  | 299396  | 101104 | 0 | 0 | 1 | 0 | 13 | 24  | 5400164  | 1 | 1 |
| SPACA5  | NaN     | NaN  | NaN | 851552  | 216448 | 0 | 0 | 0 | 0 | 50 | 116 | 39862032 | 1 | 1 |
| SPACA5B | 566535  | NaN  | 19  | 851552  | 216448 | 0 | 0 | 0 | 0 | 15 | 27  | 7730896  | 1 | 1 |
| SPAG11A | 69060   | 693  | -5  | 279816  | 82236  | 0 | 0 | 0 | 0 | 50 | 71  | 21235400 | 1 | 1 |
| SPANXA1 | NaN     | NaN  | NaN | 522608  | 131008 | 0 | 0 | 0 | 0 | 50 | 116 | 39776592 | 1 | 1 |
| SPANXA2 | NaN     | NaN  | NaN | 522608  | 131008 | 0 | 0 | 0 | 0 | 50 | 116 | 39776592 | 1 | 1 |
| SPANXB2 | NaN     | NaN  | NaN | 540408  | 140976 | 0 | 0 | 0 | 0 | 50 | 116 | 39786560 | 1 | 1 |
| SPANXC  | 23523   | NaN  | -15 | 256320  | 66216  | 0 | 0 | 0 | 0 | 50 | 88  | 22177732 | 1 | 1 |
| SPANXE  | 28355   | NaN  | -20 | 258812  | 65860  | 0 | 0 | 0 | 0 | 50 | 79  | 20617028 | 1 | 1 |
| SPANXF1 | NaN     | NaN  | NaN | 540408  | 140976 | 0 | 0 | 0 | 0 | 50 | 116 | 39786560 | 1 | 1 |
| SPANXN1 | 2363    | NaN  | -22 | 195444  | 42720  | 0 | 0 | 1 | 0 | 7  | 27  | 2635824  | 1 | 1 |
| SPATA1  | 241849  | 585  | -1  | 1224640 | 302600 | 0 | 0 | 0 | 0 | 50 | 48  | 16741612 | 1 | 1 |
| SPATA24 | NaN     | NaN  | NaN | 557140  | 128516 | 0 | 0 | 0 | 0 | 50 | 116 | 39774100 | 1 | 1 |
| SPATA3  | NaN     | NaN  | NaN | 482736  | 148452 | 0 | 0 | 0 | 0 | 50 | 116 | 39794036 | 1 | 1 |
| SPC24   | 1808766 | 233  | 33  | 517268  | 138484 | 0 | 0 | 1 | 0 | 13 | 21  | 5810276  | 1 | 1 |
| SPC25   | 173915  | 724  | 7   | 608760  | 137772 | 0 | 0 | 0 | 0 | 50 | 64  | 23708176 | 1 | 1 |
| SPCS1   | 1217701 | 272  | 47  | 429336  | 130296 | 0 | 0 | 0 | 0 | 50 | 99  | 29167792 | 1 | 1 |
| SPDYE2  | NaN     | NaN  | NaN | 2101112 | 541120 | 0 | 0 | 0 | 0 | 9  | 16  | 4898560  | 1 | 1 |
| SPDYE2L | NaN     | NaN  | NaN | 2101112 | 541120 | 0 | 0 | 0 | 0 | 9  | 16  | 4898560  | 1 | 1 |
| SPDYE4  | NaN     | NaN  | NaN | 624424  | 161624 | 0 | 0 | 1 | 0 | 50 | 117 | 39807208 | 1 | 1 |
| SPEM1   | 1906324 | 206  | 33  | 768960  | 237096 | 0 | 0 | 0 | 0 | 50 | 87  | 23542992 | 1 | 1 |
| SPHAR   | 285692  | 361  | 9   | 165896  | 39160  | 0 | 0 | 0 | 0 | 50 | 71  | 23765848 | 1 | 1 |

|         |         |      |     |         |         |   |   |   |   |    |     |          |   |   |
|---------|---------|------|-----|---------|---------|---|---|---|---|----|-----|----------|---|---|
| SPIN2B  | 145137  | NaN  | 18  | 657176  | 180136  | 0 | 0 | 0 | 0 | 50 | 49  | 14659724 | 1 | 1 |
| SPINK1  | 137041  | 470  | 2   | 216448  | 54824   | 0 | 0 | 0 | 0 | 50 | 55  | 18068068 | 1 | 1 |
| SPINK13 | 72574   | 418  | -9  | 263440  | 58028   | 0 | 0 | 0 | 0 | 50 | 57  | 21768688 | 1 | 1 |
| SPINK14 | 63265   | 390  | -8  | 263796  | 63012   | 0 | 0 | 0 | 0 | 50 | 59  | 22095140 | 1 | 1 |
| SPINK4  | 856503  | 167  | 38  | 234248  | 61588   | 0 | 0 | 1 | 0 | 8  | 3   | 1779644  | 1 | 1 |
| SPINK6  | 63265   | 390  | -8  | 219296  | 53044   | 0 | 0 | 0 | 0 | 50 | 59  | 22095140 | 1 | 1 |
| SPINK9  | 79210   | 459  | -15 | 239588  | 54112   | 0 | 0 | 1 | 0 | 0  | 1   | 54112    | 1 | 1 |
| SPINLW1 | 1069725 | 438  | 36  | 398720  | 89356   | 0 | 0 | 0 | 0 | 50 | 84  | 21025004 | 1 | 1 |
| SPINT3  | NaN     | NaN  | NaN | 235316  | 59452   | 0 | 0 | 0 | 0 | 50 | 116 | 39705036 | 1 | 1 |
| SPNS2   | 1252775 | 318  | 22  | 1364904 | 448560  | 0 | 0 | 1 | 0 | 50 | 49  | 18259952 | 1 | 1 |
| SPOCK2  | 757700  | 169  | 40  | 1157356 | 297260  | 0 | 0 | 0 | 0 | 26 | 27  | 9094376  | 1 | 1 |
| SPPL3   | 1410077 | 392  | 45  | 987544  | 288716  | 0 | 0 | 1 | 0 | 7  | 16  | 3810980  | 1 | 1 |
| SPRR1A  | 426723  | 748  | 28  | 230332  | 62300   | 0 | 0 | 1 | 0 | 5  | 4   | 1424000  | 1 | 1 |
| SPRR2B  | 687290  | 704  | 30  | 195444  | 50196   | 0 | 0 | 0 | 0 | 50 | 34  | 21429064 | 1 | 1 |
| SPRR2E  | 687290  | 704  | 30  | 187968  | 50196   | 0 | 0 | 0 | 0 | 50 | 34  | 21429064 | 1 | 1 |
| SPRR2G  | 822908  | 602  | 28  | 190460  | 50908   | 0 | 0 | 1 | 0 | 4  | 3   | 756856   | 1 | 1 |
| SPRR3   | 426723  | 748  | 28  | 421504  | 127448  | 0 | 0 | 0 | 0 | 50 | 44  | 20259960 | 1 | 1 |
| SPRR4   | 426723  | 748  | 28  | 208616  | 51976   | 0 | 0 | 0 | 0 | 5  | 4   | 1424000  | 1 | 1 |
| SPRYD5  | 4214    | 1074 | -46 | 1185480 | 291564  | 0 | 0 | 0 | 0 | 25 | 38  | 10956256 | 1 | 1 |
| SPSB1   | 980939  | 281  | 32  | 672128  | 210040  | 0 | 0 | 0 | 0 | 50 | 70  | 22411268 | 1 | 1 |
| SR140   | 361096  | 467  | 23  | 2750456 | 667144  | 0 | 0 | 0 | 0 | 3  | 1   | 2013892  | 1 | 1 |
| SRCRB4D | 870785  | 220  | 59  | 1431476 | 456748  | 0 | 0 | 0 | 0 | 11 | 8   | 5429712  | 1 | 1 |
| SRP14   | 846041  | 256  | 23  | 357068  | 101104  | 0 | 0 | 0 | 0 | 50 | 54  | 19897196 | 1 | 1 |
| SRP9    | 927421  | 168  | 9   | 326096  | 82948   | 0 | 0 | 0 | 0 | 50 | 55  | 20151380 | 1 | 1 |
| SRPX    | 141319  | NaN  | 17  | 1192244 | 336064  | 0 | 0 | 1 | 0 | 50 | 77  | 21383852 | 1 | 1 |
| SRPX2   | 190839  | NaN  | 23  | 1199720 | 331792  | 0 | 0 | 1 | 0 | 50 | 145 | 46592212 | 1 | 1 |
| SRRD    | 163136  | 553  | -46 | 875760  | 243504  | 0 | 0 | 0 | 0 | 7  | 12  | 3713792  | 1 | 1 |
| SRRM5   | NaN     | NaN  | NaN | 1831976 | 501604  | 0 | 0 | 0 | 0 | 50 | 116 | 40147188 | 1 | 1 |
| SRXN1   | 622277  | 480  | 42  | 332860  | 115700  | 0 | 0 | 0 | 0 | 50 | 60  | 28148208 | 1 | 1 |
| SRY     | 0       | 0    | 0   | 524032  | 132788  | 0 | 0 | 0 | 0 | 50 | 39  | 21173456 | 1 | 1 |
| SSC5D   | NaN     | NaN  | NaN | 3790332 | 1312572 | 0 | 0 | 0 | 0 | 0  | 0   | 1312572  | 1 | 1 |
| SSNA1   | 1722012 | 202  | 36  | 308652  | 84372   | 0 | 0 | 3 | 0 | 0  | 3   | 84372    | 1 | 1 |
| SSR2    | 1880483 | 213  | 32  | 465648  | 143112  | 0 | 0 | 1 | 0 | 50 | 94  | 23803584 | 1 | 1 |

|          |         |     |     |          |         |   |   |   |   |    |     |          |   |   |
|----------|---------|-----|-----|----------|---------|---|---|---|---|----|-----|----------|---|---|
| SSR3     | 545591  | 679 | 10  | 485584   | 129584  | 0 | 0 | 1 | 0 | 9  | 14  | 5232132  | 1 | 1 |
| SSR4     | 2103463 | NaN | 30  | 453544   | 129584  | 0 | 0 | 0 | 0 | 50 | 72  | 20936716 | 1 | 1 |
| SST      | 124494  | 431 | 13  | 287648   | 91492   | 0 | 0 | 0 | 0 | 50 | 61  | 22197312 | 1 | 1 |
| SSTR2    | 238181  | 336 | -7  | 917412   | 272340  | 0 | 0 | 2 | 0 | 5  | 4   | 3155228  | 1 | 1 |
| SSTR5    | 1154740 | 294 | 20  | 864012   | 311856  | 0 | 0 | 1 | 0 | 50 | 63  | 24684684 | 1 | 1 |
| SSX2B    | NaN     | NaN | NaN | 1063728  | 207192  | 0 | 0 | 0 | 0 | 50 | 116 | 39852776 | 1 | 1 |
| SSX3     | 660654  | NaN | 14  | 562836   | 128160  | 0 | 0 | 2 | 0 | 5  | 15  | 2177652  | 1 | 1 |
| SSX4B    | 660654  | NaN | 14  | 1130656  | 206480  | 0 | 0 | 0 | 0 | 50 | 64  | 21317280 | 1 | 1 |
| SSX5     | 590474  | NaN | 11  | 624068   | 147028  | 0 | 0 | 0 | 0 | 50 | 57  | 20146040 | 1 | 1 |
| □6GALNAC | 1016866 | 197 | 24  | 951232   | 284444  | 0 | 0 | 2 | 0 | 50 | 75  | 20563984 | 1 | 1 |
| STAG3L1  | NaN     | NaN | NaN | 542188   | 143468  | 0 | 0 | 0 | 0 | 50 | 116 | 39789052 | 1 | 1 |
| STAG3L2  | 745065  | 173 | 55  | 364544   | 93628   | 0 | 0 | 0 | 0 | 50 | 95  | 21608488 | 1 | 1 |
| STAG3L3  | 661753  | 332 | 50  | 366324   | 91848   | 0 | 0 | 0 | 0 | 50 | 54  | 17812104 | 1 | 1 |
| STARD9   | NaN     | NaN | NaN | 11776836 | 3424008 | 0 | 0 | 0 | 0 | 0  | 0   | 3424008  | 1 | 1 |
| STBD1    | 416594  | 436 | 26  | 899256   | 255252  | 0 | 0 | 0 | 0 | 16 | 16  | 7691380  | 1 | 1 |
| STK11    | 2214581 | 234 | 29  | 1119976  | 309008  | 0 | 0 | 1 | 0 | 50 | 68  | 20485664 | 1 | 1 |
| STK25    | 1215841 | 426 | 39  | 1105736  | 309364  | 0 | 0 | 2 | 0 | 19 | 27  | 7164856  | 1 | 1 |
| STMN1    | 801428  | 221 | 31  | 522608   | 134212  | 0 | 0 | 0 | 0 | 50 | 70  | 21975880 | 1 | 1 |
| STRA13   | 3814891 | 211 | 28  | 171236   | 48772   | 0 | 0 | 0 | 0 | 50 | 47  | 17845212 | 1 | 1 |
| STX7     | 180943  | 618 | 12  | 705236   | 172660  | 0 | 0 | 1 | 0 | 50 | 45  | 19218304 | 1 | 1 |
| STYX     | 310977  | 213 | 19  | 624424   | 140264  | 0 | 0 | 0 | 0 | 50 | 36  | 19973380 | 1 | 1 |
| SUB1     | 487935  | 442 | 22  | 347100   | 79032   | 0 | 0 | 0 | 0 | 50 | 53  | 21518420 | 1 | 1 |
| SUDS3    | 635715  | 823 | 32  | 888220   | 212888  | 0 | 0 | 0 | 0 | 50 | 33  | 21562208 | 1 | 1 |
| SULT1A3  | NaN     | NaN | NaN | 1554296  | 402280  | 0 | 0 | 0 | 0 | 50 | 116 | 40047864 | 1 | 1 |
| SULT1A4  | 1906000 | 253 | 52  | 1554296  | 402280  | 0 | 0 | 0 | 0 | 8  | 8   | 4018528  | 1 | 1 |
| SULT4A1  | 157623  | 473 | 13  | 749024   | 189748  | 0 | 0 | 2 | 0 | 6  | 6   | 2239952  | 1 | 1 |
| SUMF1    | 155099  | 172 | 10  | 958352   | 279460  | 0 | 0 | 0 | 0 | 39 | 43  | 15324376 | 1 | 1 |
| SUMF2    | 738325  | 642 | 4   | 1059100  | 282308  | 0 | 0 | 0 | 0 | 18 | 12  | 6589560  | 1 | 1 |
| SUMO2    | 1511891 | 168 | 25  | 260592   | 59808   | 0 | 0 | 1 | 0 | 11 | 3   | 1507304  | 1 | 1 |
| SUMO3    | 690574  | 213 | 62  | 279816   | 66216   | 0 | 0 | 2 | 0 | 2  | 4   | 515844   | 1 | 1 |
| SUMO4    | NaN     | NaN | NaN | 245640   | 64080   | 0 | 0 | 0 | 0 | 50 | 116 | 39709664 | 1 | 1 |
| SUV39H1  | 824559  | NaN | 27  | 1053760  | 292988  | 0 | 0 | 2 | 0 | 5  | 13  | 2870072  | 1 | 1 |
| SWAP70   | 545476  | 179 | 25  | 1559280  | 367392  | 0 | 0 | 0 | 0 | 44 | 68  | 20999728 | 1 | 1 |

|         |         |     |     |         |         |   |   |   |   |    |     |          |   |   |
|---------|---------|-----|-----|---------|---------|---|---|---|---|----|-----|----------|---|---|
| SYCE1L  | NaN     | NaN | NaN | 653616  | 167676  | 0 | 0 | 0 | 0 | 50 | 116 | 39813260 | 1 | 1 |
| SYCN    | 1652029 | 286 | 26  | 331080  | 110004  | 0 | 0 | 1 | 0 | 36 | 43  | 13904292 | 1 | 1 |
| SYNC    | 1452351 | 195 | 34  | 1278040 | 354932  | 0 | 0 | 0 | 0 | 43 | 68  | 24275284 | 1 | 1 |
| SYNGR1  | 932556  | 250 | 69  | 760772  | 218584  | 0 | 0 | 0 | 0 | 50 | 47  | 20307308 | 1 | 1 |
| SYNGR3  | 1747301 | 183 | 46  | 562480  | 187256  | 0 | 0 | 1 | 0 | 50 | 75  | 19137492 | 1 | 1 |
| SYNGR4  | 1478750 | 217 | 36  | 591672  | 176220  | 0 | 0 | 1 | 0 | 50 | 89  | 31278516 | 1 | 1 |
| SYS1    | 1005559 | 233 | 36  | 391956  | 123888  | 0 | 0 | 0 | 0 | 50 | 49  | 17548664 | 1 | 1 |
| SYT13   | 173203  | 637 | 14  | 1061236 | 328232  | 0 | 0 | 0 | 0 | 20 | 24  | 9624816  | 1 | 1 |
| TADA1   | 258555  | 773 | -7  | 866504  | 239944  | 0 | 0 | 0 | 0 | 50 | 53  | 24325480 | 1 | 1 |
| TAF10   | 424523  | 491 | 17  | 546460  | 178712  | 0 | 0 | 0 | 0 | 50 | 62  | 22561500 | 1 | 1 |
| TAL1    | 364960  | 414 | 3   | 799220  | 276256  | 0 | 0 | 1 | 0 | 50 | 53  | 20385984 | 1 | 1 |
| TAPBPL  | 2702142 | 198 | 50  | 1163052 | 367392  | 0 | 0 | 0 | 0 | 5  | 24  | 6185500  | 1 | 1 |
| TARM1   | NaN     | NaN | NaN | 683164  | 209684  | 0 | 0 | 0 | 0 | 50 | 116 | 39855268 | 1 | 1 |
| TARP    | 164254  | 382 | 6   | 445000  | 111428  | 0 | 0 | 0 | 0 | 50 | 38  | 17892560 | 1 | 1 |
| TAS2R10 | 408176  | 517 | 12  | 776792  | 210040  | 0 | 0 | 0 | 0 | 50 | 54  | 19041016 | 1 | 1 |
| TAX1BP3 | 504736  | 354 | 20  | 319688  | 93628   | 0 | 0 | 0 | 0 | 50 | 62  | 23395252 | 1 | 1 |
| TBC1D3  | NaN     | NaN | NaN | 2835540 | 797796  | 0 | 0 | 0 | 0 | 7  | 14  | 4485956  | 1 | 1 |
| TBC1D3C | 609181  | 684 | 12  | 2840880 | 792456  | 0 | 0 | 0 | 0 | 3  | 0   | 1438952  | 1 | 1 |
| TBC1D3G | 493184  | 556 | 12  | 1419728 | 396940  | 0 | 0 | 0 | 0 | 0  | 0   | 396940   | 1 | 1 |
| TBC1D3H | NaN     | NaN | NaN | 1420796 | 395872  | 0 | 0 | 0 | 0 | 50 | 116 | 40041456 | 1 | 1 |
| TBXA2R  | 2164055 | 269 | 35  | 1003208 | 367036  | 0 | 0 | 0 | 0 | 50 | 44  | 20043868 | 1 | 1 |
| TCEA1   | 267995  | 392 | 29  | 810968  | 195088  | 0 | 0 | 0 | 0 | 50 | 55  | 25888676 | 1 | 1 |
| TCEAL4  | 490345  | NaN | 31  | 571380  | 129228  | 0 | 0 | 0 | 0 | 50 | 66  | 22114364 | 1 | 1 |
| TCEAL5  | 455954  | NaN | 17  | 536136  | 131364  | 0 | 0 | 0 | 0 | 50 | 69  | 22928180 | 1 | 1 |
| TCEAL6  | 132641  | NaN | 4   | 475972  | 117836  | 0 | 0 | 0 | 0 | 50 | 53  | 17321536 | 1 | 1 |
| TCEAL7  | 455954  | NaN | 17  | 267000  | 60876   | 0 | 0 | 0 | 0 | 50 | 69  | 22928180 | 1 | 1 |
| TCEB1   | 258047  | 417 | 25  | 299752  | 75116   | 0 | 0 | 0 | 0 | 50 | 45  | 17237876 | 1 | 1 |
| TCERG1L | 2679    | 871 | -27 | 1476332 | 453544  | 0 | 0 | 0 | 0 | 2  | 0   | 887152   | 1 | 1 |
| TCF15   | 617464  | 404 | 39  | 473124  | 174084  | 0 | 0 | 0 | 0 | 50 | 70  | 23044592 | 1 | 1 |
| TCF7L1  | 973960  | 394 | 18  | 1476332 | 459952  | 0 | 0 | 1 | 0 | 2  | 2   | 1066576  | 1 | 1 |
| TCL1A   | 256627  | 582 | 30  | 301532  | 82948   | 0 | 0 | 0 | 0 | 50 | 57  | 21579296 | 1 | 1 |
| TDRD12  | NaN     | NaN | NaN | 1066932 | 253116  | 0 | 0 | 0 | 0 | 50 | 116 | 39898700 | 1 | 1 |
| TENC1   | 1726226 | 177 | 38  | 3620520 | 1131012 | 0 | 0 | 0 | 0 | 4  | 1   | 2378080  | 1 | 1 |

|         |         |     |     |         |        |   |   |   |   |    |     |          |   |   |
|---------|---------|-----|-----|---------|--------|---|---|---|---|----|-----|----------|---|---|
| TEX12   | 389593  | 362 | 2   | 331792  | 82592  | 0 | 0 | 0 | 0 | 50 | 48  | 17867640 | 1 | 1 |
| TEX19   | 2598845 | 179 | 36  | 415808  | 112852 | 0 | 0 | 0 | 0 | 50 | 59  | 20440452 | 1 | 1 |
| TEX261  | 380551  | 561 | 27  | 508724  | 143824 | 0 | 0 | 0 | 0 | 50 | 69  | 23313372 | 1 | 1 |
| TEX28   | NaN     | NaN | NaN | 1035960 | 300108 | 0 | 0 | 0 | 0 | 50 | 116 | 39945692 | 1 | 1 |
| TFAP4   | 944378  | 161 | 33  | 861520  | 250268 | 0 | 0 | 1 | 0 | 50 | 70  | 21042448 | 1 | 1 |
| TFDP3   | 76255   | NaN | 28  | 1020296 | 282664 | 0 | 0 | 0 | 0 | 48 | 63  | 26284904 | 1 | 1 |
| TFPI    | 50680   | 404 | -4  | 931652  | 216448 | 0 | 0 | 0 | 0 | 50 | 49  | 18533360 | 1 | 1 |
| TGFA    | 715918  | 463 | 13  | 419368  | 117836 | 0 | 0 | 0 | 0 | 50 | 53  | 19361772 | 1 | 1 |
| TGFB2   | 75157   | 386 | -18 | 1145964 | 303312 | 0 | 0 | 0 | 0 | 50 | 41  | 18575012 | 1 | 1 |
| TGIF2LY | 0       | 0   | 0   | 469208  | 131008 | 0 | 0 | 1 | 0 | 5  | 2   | 1014600  | 1 | 1 |
| THIL    | 1009250 | 152 | 30  | 1537208 | 418300 | 0 | 0 | 0 | 0 | 2  | 2   | 688148   | 1 | 1 |
| THAP2   | 259684  | 393 | -11 | 589180  | 153080 | 0 | 0 | 0 | 0 | 50 | 34  | 20198728 | 1 | 1 |
| THAP3   | 628180  | 259 | 38  | 464936  | 120328 | 0 | 0 | 1 | 0 | 46 | 63  | 18237524 | 1 | 1 |
| THOC4   | 3798594 | 211 | 19  | 658244  | 214312 | 0 | 0 | 0 | 0 | 34 | 28  | 11428668 | 1 | 1 |
| THOC7   | 153669  | 826 | -6  | 559632  | 127092 | 0 | 0 | 0 | 0 | 50 | 61  | 19340056 | 1 | 1 |
| TIGD1   | NaN     | NaN | NaN | 1495912 | 402992 | 0 | 0 | 0 | 0 | 50 | 116 | 40048576 | 1 | 1 |
| TIMM10  | 923775  | 197 | 9   | 240656  | 59452  | 0 | 0 | 0 | 0 | 50 | 53  | 18462160 | 1 | 1 |
| TIMM13  | 1604277 | 267 | 35  | 249556  | 66572  | 0 | 0 | 0 | 0 | 50 | 58  | 22805716 | 1 | 1 |
| TIMM16  | 849632  | 161 | 37  | 333216  | 91848  | 0 | 0 | 0 | 0 | 50 | 44  | 18897548 | 1 | 1 |
| TIMM22  | 1306390 | 270 | 27  | 493416  | 146316 | 0 | 0 | 0 | 0 | 50 | 50  | 19552232 | 1 | 1 |
| TIMM50  | 1410725 | 230 | 39  | 1150236 | 356712 | 0 | 0 | 3 | 0 | 1  | 3   | 869708   | 1 | 1 |
| TIMM8B  | 389805  | 179 | 31  | 257032  | 68708  | 0 | 0 | 0 | 0 | 50 | 59  | 22578232 | 1 | 1 |
| TIMM9   | 290701  | 552 | 46  | 244216  | 56960  | 0 | 0 | 0 | 0 | 50 | 48  | 18596016 | 1 | 1 |
| TIMP1   | 775214  | NaN | 38  | 542544  | 147384 | 0 | 0 | 0 | 0 | 50 | 61  | 23561148 | 1 | 1 |
| TIRAP   | 385871  | 426 | 29  | 603420  | 186900 | 0 | 0 | 1 | 0 | 5  | 7   | 2062664  | 1 | 1 |
| TK2     | 600023  | 214 | -11 | 738344  | 189748 | 0 | 0 | 0 | 0 | 50 | 80  | 23111164 | 1 | 1 |
| TLCD2   | NaN     | NaN | NaN | 639020  | 222856 | 0 | 0 | 0 | 0 | 50 | 116 | 39868440 | 1 | 1 |
| TLX1NB  | 469702  | 221 | 52  | 295836  | 98256  | 0 | 0 | 0 | 0 | 50 | 47  | 19691784 | 1 | 1 |
| TLX2    | 1019591 | 315 | 50  | 676756  | 244928 | 0 | 0 | 2 | 0 | 39 | 63  | 16896116 | 1 | 1 |
| TM2D2   | 421614  | 428 | 42  | 625848  | 180492 | 0 | 0 | 0 | 0 | 50 | 56  | 22426932 | 1 | 1 |
| TM2D3   | 322884  | 469 | -9  | 636172  | 181916 | 0 | 0 | 0 | 0 | 50 | 52  | 22455056 | 1 | 1 |
| TM4SF20 | 248187  | 164 | 18  | 588468  | 163404 | 0 | 0 | 0 | 0 | 50 | 45  | 19359992 | 1 | 1 |
| TM4SF5  | 1272092 | 222 | 28  | 498044  | 157708 | 0 | 0 | 1 | 0 | 14 | 13  | 5818820  | 1 | 1 |



|          |         |      |     |         |        |   |   |   |   |    |     |          |   |   |
|----------|---------|------|-----|---------|--------|---|---|---|---|----|-----|----------|---|---|
| TM7SF4   | 40736   | 1032 | 14  | 1174800 | 347100 | 0 | 0 | 0 | 0 | 50 | 65  | 24287032 | 1 | 1 |
| TM9SF1   | 974559  | 220  | 41  | 1540768 | 469208 | 0 | 0 | 0 | 0 | 8  | 5   | 2656828  | 1 | 1 |
| TMBIM1   | 730654  | 197  | 33  | 809900  | 236740 | 0 | 0 | 0 | 0 | 50 | 45  | 18509152 | 1 | 1 |
| TMCO2    | 627703  | 373  | 18  | 465292  | 129584 | 0 | 0 | 0 | 0 | 50 | 58  | 21496704 | 1 | 1 |
| TMCO5A   | 92801   | 921  | -59 | 788184  | 180492 | 0 | 0 | 0 | 0 | 50 | 55  | 17871912 | 1 | 1 |
| TMCO7    | 925521  | 253  | 30  | 2770392 | 812748 | 0 | 0 | 0 | 0 | 7  | 7   | 3551100  | 1 | 1 |
| TMED10   | 884650  | 154  | 47  | 564260  | 159844 | 0 | 0 | 0 | 0 | 50 | 71  | 22625936 | 1 | 1 |
| TMED5    | 608924  | 412  | 10  | 653260  | 153080 | 0 | 0 | 1 | 0 | 48 | 49  | 20217240 | 1 | 1 |
| TMEM100  | 59099   | 585  | -58 | 333928  | 102884 | 0 | 0 | 1 | 0 | 6  | 10  | 2271636  | 1 | 1 |
| TMEM106A | 1341175 | 172  | 25  | 677824  | 194732 | 0 | 0 | 0 | 0 | 50 | 70  | 21371748 | 1 | 1 |
| TMEM106E | 114769  | 532  | -9  | 723392  | 187612 | 0 | 0 | 0 | 0 | 21 | 26  | 9451800  | 1 | 1 |
| TMEM109  | 794900  | 522  | 47  | 581348  | 213244 | 0 | 0 | 0 | 0 | 50 | 51  | 21913580 | 1 | 1 |
| TMEM111  | 944872  | 170  | 42  | 692420  | 176932 | 0 | 0 | 0 | 0 | 50 | 62  | 23148188 | 1 | 1 |
| TMEM114  | NaN     | NaN  | NaN | 304380  | 96120  | 0 | 0 | 0 | 0 | 50 | 116 | 39741704 | 1 | 1 |
| TMEM121  | 689089  | 298  | 41  | 755432  | 269848 | 0 | 0 | 0 | 0 | 36 | 23  | 13861928 | 1 | 1 |
| TMEM125  | 1091212 | 264  | 30  | 506944  | 197936 | 0 | 0 | 0 | 0 | 50 | 55  | 21358220 | 1 | 1 |
| TMEM126E | 325720  | 554  | -19 | 522964  | 138128 | 0 | 0 | 0 | 0 | 50 | 100 | 24725980 | 1 | 1 |
| TMEM127  | 904852  | 213  | 43  | 581348  | 192952 | 0 | 0 | 1 | 0 | 50 | 63  | 24111168 | 1 | 1 |
| TMEM128  | 146135  | 584  | 35  | 376292  | 95764  | 0 | 0 | 0 | 0 | 50 | 50  | 17705304 | 1 | 1 |
| TMEM129  | 867402  | 350  | 39  | 894272  | 281596 | 0 | 0 | 0 | 0 | 15 | 10  | 5965136  | 1 | 1 |
| TMEM132C | NaN     | NaN  | NaN | 2742624 | 844788 | 0 | 0 | 1 | 0 | 9  | 17  | 5202228  | 1 | 1 |
| TMEM134  | 1392213 | 215  | 53  | 508724  | 147028 | 0 | 0 | 0 | 0 | 50 | 41  | 15455384 | 1 | 1 |
| TMEM136  | 290558  | 173  | 28  | 386972  | 98968  | 0 | 0 | 0 | 0 | 50 | 56  | 24592480 | 1 | 1 |
| TMEM138  | 1394229 | 286  | 57  | 421504  | 113564 | 0 | 0 | 0 | 0 | 50 | 56  | 17921040 | 1 | 1 |
| TMEM141  | 1898901 | 190  | 39  | 295836  | 72624  | 0 | 0 | 0 | 0 | 50 | 67  | 24888672 | 1 | 1 |
| TMEM146  | 990266  | 225  | 26  | 2095772 | 558208 | 0 | 0 | 0 | 0 | 11 | 8   | 4396244  | 1 | 1 |
| TMEM147  | 1081638 | 390  | 41  | 588824  | 161980 | 0 | 0 | 1 | 0 | 50 | 73  | 18185192 | 1 | 1 |
| TMEM149  | 1151198 | 321  | 30  | 860096  | 299752 | 0 | 0 | 0 | 0 | 14 | 10  | 6958732  | 1 | 1 |
| TMEM14A  | 531039  | 498  | 18  | 260948  | 76540  | 0 | 0 | 0 | 0 | 50 | 62  | 18527308 | 1 | 1 |
| TMEM14E  | 194580  | 402  | 35  | 312568  | 93272  | 0 | 0 | 1 | 0 | 15 | 24  | 6088668  | 1 | 1 |
| TMEM150E | 1028808 | 209  | 19  | 594876  | 180492 | 0 | 0 | 6 | 0 | 1  | 6   | 235316   | 1 | 1 |
| TMEM151E | NaN     | NaN  | NaN | 1377720 | 447492 | 0 | 0 | 0 | 0 | 50 | 116 | 40093076 | 1 | 1 |
| TMEM154  | 165925  | 507  | 44  | 495552  | 119616 | 0 | 0 | 1 | 0 | 50 | 68  | 21089440 | 1 | 1 |

|          |         |      |     |         |        |   |   |   |   |    |     |          |   |   |
|----------|---------|------|-----|---------|--------|---|---|---|---|----|-----|----------|---|---|
| TMEM155  | 326547  | 440  | 18  | 335352  | 97188  | 0 | 0 | 0 | 0 | 50 | 63  | 25522708 | 1 | 1 |
| TMEM158  | NaN     | NaN  | NaN | 689572  | 274832 | 0 | 0 | 0 | 0 | 50 | 116 | 39920416 | 1 | 1 |
| TMEM160  | 1175364 | 207  | 35  | 454256  | 164116 | 0 | 0 | 0 | 0 | 50 | 53  | 19463232 | 1 | 1 |
| MEM161F  | 96521   | 1090 | 3   | 1264868 | 345676 | 0 | 0 | 1 | 0 | 50 | 36  | 16918544 | 1 | 1 |
| TMEM163  | 261980  | 649  | 5   | 739056  | 222144 | 0 | 0 | 0 | 0 | 50 | 50  | 20062380 | 1 | 1 |
| MEM167F  | 230539  | 717  | 8   | 197580  | 49128  | 0 | 0 | 0 | 0 | 50 | 52  | 20884384 | 1 | 1 |
| TMEM17   | 303217  | 553  | 14  | 511216  | 139196 | 0 | 0 | 0 | 0 | 50 | 63  | 23133948 | 1 | 1 |
| MEM170F  | 490399  | 133  | 16  | 358136  | 117124 | 0 | 0 | 1 | 0 | 21 | 19  | 7032068  | 1 | 1 |
| MEM170F  | 126262  | 429  | 32  | 333572  | 101104 | 0 | 0 | 0 | 0 | 50 | 60  | 24666172 | 1 | 1 |
| TMEM173  | 781521  | 204  | 35  | 940552  | 300464 | 0 | 0 | 0 | 0 | 42 | 37  | 13738752 | 1 | 1 |
| TMEM174  | 447937  | 584  | 21  | 604844  | 183340 | 0 | 0 | 2 | 0 | 7  | 11  | 2169464  | 1 | 1 |
| MEM176F  | 749051  | 604  | 16  | 598080  | 183696 | 0 | 0 | 0 | 0 | 50 | 78  | 22402724 | 1 | 1 |
| TMEM177  | 337284  | 441  | 29  | 747956  | 255964 | 0 | 0 | 2 | 0 | 7  | 5   | 2923828  | 1 | 1 |
| TMEM178  | 155474  | 624  | -7  | 738700  | 231044 | 0 | 0 | 0 | 0 | 50 | 60  | 26628800 | 1 | 1 |
| TMEM179  | 625253  | 450  | 20  | 496976  | 148096 | 0 | 0 | 0 | 0 | 50 | 62  | 21152808 | 1 | 1 |
| TMEM180  | 871726  | 178  | 41  | 1275192 | 418656 | 0 | 0 | 0 | 0 | 48 | 58  | 21114360 | 1 | 1 |
| MEM183F  | NaN     | NaN  | NaN | 971524  | 270560 | 0 | 0 | 0 | 0 | 50 | 116 | 39916144 | 1 | 1 |
| MEM183F  | 421206  | 389  | 30  | 971524  | 270560 | 0 | 0 | 0 | 0 | 50 | 58  | 20614536 | 1 | 1 |
| TMEM186  | 401809  | 358  | -9  | 531864  | 160200 | 0 | 0 | 1 | 0 | 50 | 53  | 20820660 | 1 | 1 |
| TMEM188  | 270030  | 594  | -12 | 382700  | 103240 | 0 | 0 | 0 | 0 | 50 | 41  | 18369244 | 1 | 1 |
| TMEM189  | NaN     | NaN  | NaN | 694200  | 195444 | 0 | 0 | 0 | 0 | 50 | 116 | 39841028 | 1 | 1 |
| M189-UBI | 571130  | 136  | 58  | 953368  | 265220 | 0 | 0 | 1 | 0 | 50 | 87  | 17843076 | 1 | 1 |
| MEM194F  | NaN     | NaN  | NaN | 1086512 | 289072 | 0 | 0 | 0 | 0 | 50 | 116 | 39934656 | 1 | 1 |
| TMEM195  | 17876   | 1102 | -22 | 1170884 | 309364 | 0 | 0 | 0 | 0 | 5  | 10  | 2783920  | 1 | 1 |
| TMEM20   | 497832  | 589  | 1   | 909580  | 273764 | 0 | 0 | 0 | 0 | 50 | 72  | 24067024 | 1 | 1 |
| MEM200F  | 598249  | 235  | 19  | 709152  | 281952 | 0 | 0 | 0 | 0 | 50 | 55  | 18402708 | 1 | 1 |
| TMEM203  | 1723416 | 200  | 39  | 326096  | 112852 | 0 | 0 | 2 | 0 | 0  | 2   | 112852   | 1 | 1 |
| TMEM205  | 1385739 | 197  | 31  | 479532  | 144180 | 0 | 0 | 1 | 0 | 50 | 60  | 22230420 | 1 | 1 |
| TMEM212  | NaN     | NaN  | NaN | 493060  | 150944 | 0 | 0 | 0 | 0 | 50 | 116 | 39796528 | 1 | 1 |
| TMEM216  | 1394229 | 286  | 57  | 384836  | 113920 | 0 | 0 | 0 | 0 | 50 | 56  | 17921040 | 1 | 1 |
| TMEM217  | 626559  | 236  | 44  | 598436  | 151300 | 0 | 0 | 0 | 0 | 50 | 57  | 22705680 | 1 | 1 |
| TMEM218  | 428178  | 762  | 30  | 285868  | 98612  | 0 | 0 | 0 | 0 | 50 | 45  | 18518764 | 1 | 1 |
| TMEM22   | 194047  | 195  | 27  | 1035248 | 292276 | 0 | 0 | 0 | 0 | 50 | 42  | 19034252 | 1 | 1 |

|          |         |     |     |         |        |   |   |   |   |    |     |          |   |   |
|----------|---------|-----|-----|---------|--------|---|---|---|---|----|-----|----------|---|---|
| TMEM220  | 59041   | 801 | -49 | 417944  | 119260 | 0 | 0 | 1 | 0 | 14 | 14  | 5326828  | 1 | 1 |
| TMEM223  | 2405109 | 248 | 44  | 480600  | 176220 | 0 | 0 | 1 | 0 | 43 | 54  | 16227904 | 1 | 1 |
| TMEM229A | NaN     | NaN | NaN | 910292  | 310432 | 0 | 0 | 0 | 0 | 50 | 116 | 39956016 | 1 | 1 |
| TMEM229F | 488731  | 311 | 39  | 418300  | 124244 | 0 | 0 | 1 | 0 | 39 | 29  | 12549712 | 1 | 1 |
| TMEM231  | 488582  | 225 | 6   | 914208  | 230688 | 0 | 0 | 2 | 0 | 9  | 15  | 2647216  | 1 | 1 |
| TMEM232  | NaN     | NaN | NaN | 1737992 | 425776 | 0 | 0 | 0 | 0 | 50 | 116 | 40071360 | 1 | 1 |
| TMEM233  | NaN     | NaN | NaN | 283376  | 77608  | 0 | 0 | 0 | 0 | 50 | 116 | 39723192 | 1 | 1 |
| TMEM25   | 1359480 | 167 | 47  | 943756  | 302600 | 0 | 0 | 1 | 0 | 11 | 21  | 5243524  | 1 | 1 |
| TMEM27   | 170317  | NaN | 28  | 583128  | 152724 | 0 | 0 | 0 | 0 | 50 | 56  | 24571832 | 1 | 1 |
| TMEM30B  | 351491  | 448 | -11 | 852976  | 274832 | 0 | 0 | 0 | 0 | 50 | 55  | 22840248 | 1 | 1 |
| TMEM33   | 272281  | 261 | 25  | 641868  | 178356 | 0 | 0 | 0 | 0 | 50 | 58  | 22426220 | 1 | 1 |
| TMEM35   | 422603  | NaN | 29  | 406552  | 135992 | 0 | 0 | 0 | 0 | 50 | 44  | 19018944 | 1 | 1 |
| TMEM41A  | 953031  | 366 | 31  | 664296  | 203988 | 0 | 0 | 0 | 0 | 50 | 52  | 20219732 | 1 | 1 |
| TMEM42   | 466410  | 380 | 31  | 399076  | 124244 | 0 | 0 | 1 | 0 | 1  | 3   | 595944   | 1 | 1 |
| TMEM43   | 312564  | 463 | 27  | 1030264 | 301532 | 0 | 0 | 0 | 0 | 50 | 51  | 19996876 | 1 | 1 |
| TMEM48   | 535585  | 319 | 24  | 1761488 | 473836 | 0 | 0 | 0 | 0 | 2  | 1   | 904240   | 1 | 1 |
| TMEM49   | 1018847 | 361 | 22  | 1070848 | 280172 | 0 | 0 | 0 | 0 | 12 | 18  | 5887172  | 1 | 1 |
| TMEM54   | 1019374 | 232 | 15  | 552512  | 183340 | 0 | 0 | 2 | 0 | 26 | 35  | 8711676  | 1 | 1 |
| TMEM64   | 184765  | 746 | 8   | 904596  | 324672 | 0 | 0 | 1 | 0 | 50 | 71  | 22626292 | 1 | 1 |
| TMEM66   | 387693  | 231 | 51  | 860808  | 249912 | 0 | 0 | 0 | 0 | 50 | 42  | 19128948 | 1 | 1 |
| TMEM69   | 953032  | 157 | 30  | 619084  | 184052 | 0 | 0 | 1 | 0 | 50 | 86  | 24486748 | 1 | 1 |
| TMEM70   | 258047  | 417 | 25  | 655396  | 200072 | 0 | 0 | 1 | 0 | 50 | 45  | 17237876 | 1 | 1 |
| TMEM82   | 683349  | 174 | 22  | 819512  | 304024 | 0 | 0 | 1 | 0 | 50 | 63  | 23254276 | 1 | 1 |
| TMEM85   | 453823  | 242 | 11  | 479888  | 128872 | 0 | 0 | 0 | 0 | 50 | 82  | 26130400 | 1 | 1 |
| TMEM86A  | 616892  | 562 | 25  | 589536  | 193308 | 0 | 0 | 0 | 0 | 50 | 61  | 21289512 | 1 | 1 |
| TMEM86B  | 1035412 | 209 | 5   | 552156  | 183696 | 0 | 0 | 0 | 0 | 50 | 50  | 17199784 | 1 | 1 |
| TMEM88   | 2148615 | 337 | 24  | 370596  | 148452 | 0 | 0 | 1 | 0 | 32 | 35  | 14422984 | 1 | 1 |
| TMEM88B  | NaN     | NaN | NaN | 372376  | 156284 | 0 | 0 | 0 | 0 | 50 | 116 | 39801868 | 1 | 1 |
| TMEM9    | 572258  | 333 | 23  | 475616  | 135280 | 0 | 0 | 0 | 0 | 50 | 45  | 23164208 | 1 | 1 |
| TMEM90A  | 604423  | 384 | 45  | 594520  | 184052 | 0 | 0 | 0 | 0 | 50 | 47  | 21806424 | 1 | 1 |
| TMEM90B  | 178967  | 927 | -37 | 655752  | 186900 | 0 | 0 | 0 | 0 | 50 | 84  | 15628756 | 1 | 1 |
| TMEM91   | 1193025 | 249 | 33  | 512996  | 153436 | 0 | 0 | 0 | 0 | 50 | 52  | 16514128 | 1 | 1 |
| TMEM93   | 504736  | 354 | 20  | 264864  | 95052  | 0 | 0 | 0 | 0 | 50 | 62  | 23395252 | 1 | 1 |

|           |         |     |     |         |        |   |   |   |   |    |     |          |   |   |
|-----------|---------|-----|-----|---------|--------|---|---|---|---|----|-----|----------|---|---|
| 4PRSS11B  | NaN     | NaN | NaN | 283732  | 68708  | 0 | 0 | 0 | 0 | 50 | 116 | 39714292 | 1 | 1 |
| TMSB10    | 848135  | 275 | 12  | 125668  | 27056  | 0 | 0 | 0 | 0 | 50 | 83  | 24831356 | 1 | 1 |
| TMSB15A   | 96151   | NaN | 0   | 128872  | 27056  | 0 | 0 | 0 | 0 | 15 | 12  | 5373464  | 1 | 1 |
| TMSB15B   | 439642  | NaN | 30  | 128872  | 27056  | 0 | 0 | 0 | 0 | 50 | 63  | 20255688 | 1 | 1 |
| TMSB4X    | NaN     | NaN | NaN | 126380  | 26344  | 0 | 0 | 0 | 0 | 50 | 116 | 39671928 | 1 | 1 |
| TMSL3     | NaN     | NaN | NaN | 118548  | 27768  | 0 | 0 | 0 | 0 | 50 | 116 | 39673352 | 1 | 1 |
| TNFAIP2   | 952836  | 211 | 40  | 1626208 | 515132 | 0 | 0 | 1 | 0 | 50 | 66  | 22779372 | 1 | 1 |
| TNFAIP8L  | 921603  | 203 | 35  | 450696  | 152724 | 0 | 0 | 0 | 0 | 50 | 61  | 21420164 | 1 | 1 |
| TNFRSF12L | 1443513 | 234 | 49  | 324316  | 107156 | 0 | 0 | 0 | 0 | 50 | 48  | 18953440 | 1 | 1 |
| TNFRSF18  | 2356409 | 196 | 27  | 836600  | 228196 | 0 | 0 | 0 | 0 | 50 | 61  | 26748416 | 1 | 1 |
| TNFRSF4   | 2356409 | 196 | 27  | 699896  | 218584 | 0 | 0 | 2 | 0 | 6  | 12  | 3767192  | 1 | 1 |
| TNFRSF6E  | 1126597 | 202 | 36  | 731936  | 249556 | 0 | 0 | 0 | 0 | 50 | 50  | 18382060 | 1 | 1 |
| TNFSF12   | NaN     | NaN | NaN | 621576  | 209328 | 0 | 0 | 1 | 0 | 50 | 117 | 39854912 | 1 | 1 |
| SF12-TNF  | 1957426 | 194 | 24  | 850128  | 257388 | 0 | 0 | 0 | 0 | 17 | 20  | 7764360  | 1 | 1 |
| TNFSF14   | 745830  | 259 | 29  | 593096  | 196156 | 0 | 0 | 0 | 0 | 50 | 62  | 22972324 | 1 | 1 |
| TNFSF15   | 249550  | 286 | -8  | 641156  | 179068 | 0 | 0 | 2 | 0 | 0  | 2   | 179068   | 1 | 1 |
| TNFSF18   | 251425  | 492 | 0   | 517268  | 133144 | 0 | 0 | 0 | 0 | 50 | 56  | 21520912 | 1 | 1 |
| TNNI3     | 1036976 | 266 | -1  | 545392  | 157352 | 0 | 0 | 0 | 0 | 50 | 46  | 14741248 | 1 | 1 |
| TOMM22    | 1056349 | 262 | 45  | 364900  | 108224 | 0 | 0 | 0 | 0 | 50 | 70  | 24305544 | 1 | 1 |
| TOMM40    | 961910  | 196 | 2   | 923108  | 281596 | 0 | 0 | 0 | 0 | 50 | 53  | 16742680 | 1 | 1 |
| TOMM5     | 511883  | 338 | 34  | 264864  | 75828  | 0 | 0 | 1 | 0 | 11 | 19  | 4786420  | 1 | 1 |
| TOMM6     | NaN     | NaN | NaN | 191884  | 56960  | 0 | 0 | 0 | 0 | 50 | 116 | 39702544 | 1 | 1 |
| TOMM7     | 956904  | 381 | 19  | 152724  | 37380  | 0 | 0 | 0 | 0 | 50 | 63  | 20553660 | 1 | 1 |
| TP53RK    | 292810  | 636 | 33  | 617660  | 200428 | 0 | 0 | 0 | 0 | 7  | 10  | 1621224  | 1 | 1 |
| TP53TG3   | NaN     | NaN | NaN | 896052  | 318264 | 0 | 0 | 0 | 0 | 50 | 116 | 39963848 | 1 | 1 |
| TP53TG3B  | NaN     | NaN | NaN | 896052  | 318264 | 0 | 0 | 0 | 0 | 50 | 116 | 39963848 | 1 | 1 |
| TPRA1     | 682035  | 336 | 42  | 1009616 | 231400 | 0 | 0 | 4 | 0 | 4  | 6   | 1095056  | 1 | 1 |
| TPSAB1    | 1275017 | 294 | 21  | 693132  | 210396 | 0 | 0 | 0 | 0 | 50 | 54  | 21927108 | 1 | 1 |
| TPSB2     | 1275017 | 294 | 21  | 690284  | 214312 | 0 | 0 | 0 | 0 | 50 | 54  | 21927108 | 1 | 1 |
| TPSG1     | 1275017 | 294 | 21  | 786760  | 270560 | 0 | 0 | 0 | 0 | 50 | 54  | 21927108 | 1 | 1 |
| TRAF1     | 645995  | 270 | 39  | 1055540 | 306160 | 0 | 0 | 0 | 0 | 50 | 78  | 24143564 | 1 | 1 |
| TRAPPC1   | 1794630 | 337 | 33  | 376292  | 106444 | 0 | 0 | 0 | 0 | 50 | 73  | 19666152 | 1 | 1 |
| TRAPPC2   | 135235  | NaN | 48  | 478108  | 108224 | 0 | 0 | 0 | 0 | 50 | 57  | 19943832 | 1 | 1 |

|         |         |     |     |         |        |   |   |   |   |    |     |          |   |   |
|---------|---------|-----|-----|---------|--------|---|---|---|---|----|-----|----------|---|---|
| TRAPPC3 | 800052  | 190 | 31  | 471700  | 127448 | 0 | 0 | 0 | 0 | 50 | 71  | 22071644 | 1 | 1 |
| TRAPPC5 | 688482  | 384 | 31  | 457460  | 154504 | 0 | 0 | 0 | 0 | 50 | 67  | 22649432 | 1 | 1 |
| TREML2  | 227466  | 611 | 41  | 800644  | 248132 | 0 | 0 | 3 | 0 | 3  | 6   | 896408   | 1 | 1 |
| TRIB1   | 322911  | 193 | 40  | 912072  | 291564 | 0 | 0 | 2 | 0 | 50 | 58  | 19804992 | 1 | 1 |
| TRIM34  | NaN     | NaN | NaN | 1309724 | 338200 | 0 | 0 | 0 | 0 | 50 | 116 | 39983784 | 1 | 1 |
| TRIM40  | 1932849 | 486 | 48  | 592740  | 161268 | 0 | 0 | 0 | 0 | 50 | 60  | 20279184 | 1 | 1 |
| TRIM43B | NaN     | NaN | NaN | 1172664 | 285156 | 0 | 0 | 0 | 0 | 50 | 116 | 39930740 | 1 | 1 |
| TRIM49L | NaN     | NaN | NaN | 2357432 | 596656 | 0 | 0 | 0 | 0 | 7  | 14  | 4284816  | 1 | 1 |
| TRIM52  | 1034999 | 415 | 35  | 772876  | 186188 | 0 | 0 | 0 | 0 | 50 | 49  | 14891124 | 1 | 1 |
| TRIM54  | 1245306 | 182 | 52  | 1037028 | 285156 | 0 | 0 | 1 | 0 | 32 | 27  | 12262064 | 1 | 1 |
| TRIM61  | 170469  | 732 | 22  | 544680  | 136704 | 0 | 0 | 1 | 0 | 7  | 96  | 28550132 | 1 | 1 |
| TRIM64  | NaN     | NaN | NaN | 1165900 | 297260 | 0 | 0 | 0 | 0 | 50 | 116 | 39942844 | 1 | 1 |
| TRIM64B | NaN     | NaN | NaN | 1163764 | 299396 | 0 | 0 | 0 | 0 | 50 | 116 | 39944980 | 1 | 1 |
| TRIM66  | NaN     | NaN | NaN | 3111440 | 868996 | 0 | 0 | 0 | 0 | 7  | 14  | 4557156  | 1 | 1 |
| TRIM77  | NaN     | NaN | NaN | 1171240 | 292988 | 0 | 0 | 0 | 0 | 50 | 116 | 39938572 | 1 | 1 |
| TRNP1   | NaN     | NaN | NaN | 520828  | 211820 | 0 | 0 | 0 | 0 | 50 | 116 | 39857404 | 1 | 1 |
| TRYX3   | 207881  | 645 | -7  | 630832  | 168032 | 0 | 0 | 0 | 0 | 50 | 51  | 27456500 | 1 | 1 |
| TSC22D3 | 189575  | NaN | 51  | 609472  | 175508 | 0 | 0 | 0 | 0 | 50 | 53  | 21768688 | 1 | 1 |
| TSEN15  | 372562  | 761 | 8   | 464580  | 122820 | 0 | 0 | 0 | 0 | 50 | 75  | 24832424 | 1 | 1 |
| TSGA14  | 419615  | 298 | 27  | 979000  | 264152 | 0 | 0 | 0 | 0 | 38 | 45  | 16850548 | 1 | 1 |
| TSHB    | 605838  | 601 | 1   | 359916  | 95052  | 0 | 0 | 0 | 0 | 50 | 87  | 24852004 | 1 | 1 |
| TSPAN17 | 579630  | 359 | 40  | 862588  | 238520 | 0 | 0 | 1 | 0 | 50 | 54  | 21554376 | 1 | 1 |
| TSPAN19 | 22140   | 974 | -27 | 672840  | 159132 | 0 | 0 | 0 | 0 | 50 | 91  | 23528396 | 1 | 1 |
| TSPO    | 624112  | 241 | 48  | 545036  | 97900  | 0 | 0 | 1 | 0 | 22 | 29  | 9517660  | 1 | 1 |
| TSPO2   | 145501  | 611 | 37  | 420080  | 140620 | 0 | 0 | 2 | 0 | 8  | 15  | 2453196  | 1 | 1 |
| TSPY1   | NaN     | NaN | NaN | 796016  | 217516 | 0 | 0 | 0 | 0 | 50 | 116 | 39863100 | 1 | 1 |
| TSPY3   | NaN     | NaN | NaN | 2401220 | 650056 | 0 | 0 | 0 | 0 | 7  | 14  | 4338216  | 1 | 1 |
| TSPY4   | NaN     | NaN | NaN | 2489864 | 679960 | 0 | 0 | 0 | 0 | 7  | 14  | 4368120  | 1 | 1 |
| TSR2    | 296262  | NaN | 5   | 500536  | 133856 | 0 | 0 | 0 | 0 | 50 | 50  | 17196224 | 1 | 1 |
| TSSC4   | 833749  | 589 | 47  | 793880  | 267712 | 0 | 0 | 0 | 0 | 50 | 48  | 23387064 | 1 | 1 |
| TSTD1   | NaN     | NaN | NaN | 324672  | 96120  | 0 | 0 | 0 | 0 | 50 | 116 | 39741704 | 1 | 1 |
| TTC15   | 255812  | 502 | 9   | 1857608 | 547528 | 0 | 0 | 0 | 0 | 33 | 31  | 13432592 | 1 | 1 |
| TTC18   | 838780  | 249 | 45  | 2935576 | 774656 | 0 | 0 | 0 | 0 | 5  | 2   | 2535788  | 1 | 1 |

|          |         |      |     |         |         |   |   |   |   |    |     |          |   |   |
|----------|---------|------|-----|---------|---------|---|---|---|---|----|-----|----------|---|---|
| TTC24    | 2049505 | 180  | 37  | 1467076 | 443576  | 0 | 0 | 1 | 0 | 50 | 64  | 19075904 | 1 | 1 |
| TTC28    | NaN     | NaN  | NaN | 6199384 | 1846928 | 0 | 0 | 0 | 0 | 0  | 0   | 1846928  | 1 | 1 |
| TTC35    | 188664  | 962  | 21  | 816308  | 183340  | 0 | 0 | 0 | 0 | 50 | 36  | 20404140 | 1 | 1 |
| TLL13    | 956589  | 139  | 45  | 1194736 | 317552  | 0 | 0 | 0 | 0 | 50 | 59  | 25416976 | 1 | 1 |
| TUBA4A   | 694442  | 193  | 44  | 1129232 | 328588  | 0 | 0 | 0 | 0 | 50 | 75  | 22905396 | 1 | 1 |
| TUBA8    | 519135  | 179  | 19  | 1134572 | 326452  | 0 | 0 | 1 | 0 | 50 | 47  | 18843792 | 1 | 1 |
| TUBB2C   | 1724821 | 399  | 43  | 1129944 | 316128  | 0 | 0 | 0 | 0 | 50 | 60  | 16636592 | 1 | 1 |
| TUBB4    | 851008  | 212  | 27  | 1120332 | 318264  | 0 | 0 | 0 | 0 | 5  | 6   | 1991108  | 1 | 1 |
| TUBB4Q   | 59973   | 1059 | -12 | 1093632 | 309720  | 0 | 0 | 0 | 0 | 50 | 72  | 25435132 | 1 | 1 |
| TUSC1    | NaN     | NaN  | NaN | 501960  | 180492  | 0 | 0 | 0 | 0 | 50 | 116 | 39826076 | 1 | 1 |
| TUSC2    | 843769  | 206  | 51  | 275900  | 88288   | 0 | 0 | 0 | 0 | 50 | 68  | 20472848 | 1 | 1 |
| TUSC3    | 50254   | 1013 | -41 | 929516  | 250624  | 0 | 0 | 0 | 0 | 50 | 97  | 23911096 | 1 | 1 |
| TWIST1   | 103347  | 812  | -15 | 498044  | 156640  | 0 | 0 | 1 | 0 | 6  | 5   | 1796020  | 1 | 1 |
| TXN      | 207910  | 302  | 8   | 292276  | 66572   | 0 | 0 | 0 | 0 | 50 | 50  | 20275980 | 1 | 1 |
| TXNDC17  | 663953  | 424  | 9   | 328588  | 81524   | 0 | 0 | 0 | 0 | 50 | 52  | 18304452 | 1 | 1 |
| TXNDC3   | 103411  | 646  | 13  | 1585624 | 369884  | 0 | 0 | 0 | 0 | 50 | 48  | 18056676 | 1 | 1 |
| TXNDC5   | 748889  | 288  | 10  | 1106092 | 321824  | 0 | 0 | 0 | 0 | 42 | 79  | 24788992 | 1 | 1 |
| TXNDC6   | 199119  | 358  | 18  | 706660  | 177644  | 0 | 0 | 0 | 0 | 50 | 53  | 18163120 | 1 | 1 |
| TXNDC8   | 210246  | 302  | 7   | 326096  | 71200   | 0 | 0 | 0 | 0 | 50 | 49  | 19313712 | 1 | 1 |
| TXNL4A   | 399915  | 506  | 36  | 377716  | 89000   | 0 | 0 | 1 | 0 | 19 | 23  | 7453216  | 1 | 1 |
| TXNRD3IT | 283619  | 508  | 43  | 338200  | 99680   | 0 | 0 | 0 | 0 | 50 | 65  | 18431188 | 1 | 1 |
| UBAC2    | 333101  | 390  | 55  | 1060880 | 247420  | 0 | 0 | 1 | 0 | 50 | 62  | 20369252 | 1 | 1 |
| UBB      | 881521  | 169  | 4   | 568888  | 172304  | 0 | 0 | 2 | 0 | 30 | 26  | 8257420  | 1 | 1 |
| UBE2CBP  | 164732  | 607  | -6  | 1017092 | 270916  | 0 | 0 | 0 | 0 | 50 | 70  | 26293092 | 1 | 1 |
| UBE2E1   | 400750  | 319  | 10  | 510504  | 132432  | 0 | 0 | 0 | 0 | 50 | 50  | 21924260 | 1 | 1 |
| UBE2G1   | 1040590 | 292  | 26  | 453544  | 115700  | 0 | 0 | 0 | 0 | 50 | 70  | 22622732 | 1 | 1 |
| UBE2G2   | 754837  | 213  | 48  | 448560  | 106800  | 0 | 0 | 0 | 0 | 50 | 50  | 16454676 | 1 | 1 |
| UBE2NL   | 5046    | NaN  | -19 | 385904  | 109648  | 0 | 0 | 0 | 0 | 50 | 90  | 21252488 | 1 | 1 |
| UBE2QL1  | NaN     | NaN  | NaN | 407620  | 115700  | 0 | 0 | 0 | 0 | 50 | 116 | 39761284 | 1 | 1 |
| UBE2V1   | 571130  | 136  | 58  | 477752  | 114988  | 0 | 0 | 0 | 0 | 50 | 87  | 17843076 | 1 | 1 |
| UBE2W    | 257905  | 407  | 34  | 445000  | 105020  | 0 | 0 | 0 | 0 | 50 | 50  | 19337564 | 1 | 1 |
| UBL4B    | 571576  | 400  | 29  | 433964  | 128872  | 0 | 0 | 0 | 0 | 49 | 55  | 19542620 | 1 | 1 |
| UBL5     | 1069900 | 579  | -26 | 205768  | 48416   | 0 | 0 | 0 | 0 | 50 | 87  | 20502040 | 1 | 1 |

|         |         |      |     |         |         |   |   |   |   |    |     |          |   |   |
|---------|---------|------|-----|---------|---------|---|---|---|---|----|-----|----------|---|---|
| UBR7    | 325787  | 222  | 35  | 1154864 | 252760  | 0 | 0 | 0 | 0 | 1  | 0   | 372376   | 1 | 1 |
| UBTFL1  | NaN     | NaN  | NaN | 1023144 | 238164  | 0 | 0 | 1 | 0 | 50 | 117 | 39883748 | 1 | 1 |
| UBXN10  | 649343  | 508  | 30  | 690996  | 213600  | 0 | 0 | 0 | 0 | 50 | 72  | 24127900 | 1 | 1 |
| UBXN8   | 365415  | 346  | 28  | 705236  | 194020  | 0 | 0 | 2 | 0 | 1  | 2   | 411180   | 1 | 1 |
| UCK2    | 321876  | 403  | 1   | 683520  | 181560  | 0 | 0 | 3 | 0 | 0  | 3   | 181560   | 1 | 1 |
| UCN     | 1245306 | 182  | 52  | 294056  | 112852  | 0 | 0 | 0 | 0 | 50 | 41  | 22639464 | 1 | 1 |
| UCN2    | 1433482 | 183  | 41  | 268780  | 97544   | 0 | 0 | 0 | 0 | 50 | 91  | 30129348 | 1 | 1 |
| UCP3    | 523442  | 225  | 51  | 792812  | 237808  | 0 | 0 | 1 | 0 | 50 | 45  | 21449000 | 1 | 1 |
| UFD1L   | 650407  | 300  | 16  | 827700  | 206124  | 0 | 0 | 2 | 0 | 2  | 3   | 469208   | 1 | 1 |
| UFSP1   | 1339207 | 433  | 48  | 347456  | 110716  | 0 | 0 | 1 | 0 | 1  | 4   | 647920   | 1 | 1 |
| UGT2A2  | 19584   | 1065 | -8  | 1353512 | 362764  | 0 | 0 | 0 | 0 | 49 | 60  | 22864456 | 1 | 1 |
| ULBP2   | 423805  | 245  | 34  | 632612  | 178000  | 0 | 0 | 0 | 0 | 50 | 59  | 20035324 | 1 | 1 |
| UNC50   | 260302  | 696  | 39  | 669992  | 184408  | 0 | 0 | 1 | 0 | 50 | 65  | 21358576 | 1 | 1 |
| UNKL    | 1211641 | 215  | 40  | 1281956 | 391600  | 0 | 0 | 0 | 0 | 18 | 25  | 8945212  | 1 | 1 |
| UPF0639 | NaN     | NaN  | NaN | 1338560 | 339268  | 0 | 0 | 0 | 0 | 50 | 116 | 39984852 | 1 | 1 |
| UPK3B   | 882992  | 220  | 56  | 929516  | 201496  | 0 | 0 | 0 | 0 | 50 | 51  | 18156712 | 1 | 1 |
| UPK3BL  | NaN     | NaN  | NaN | 658244  | 211108  | 0 | 0 | 0 | 0 | 50 | 116 | 39856692 | 1 | 1 |
| UPP1    | 108417  | 409  | 26  | 801000  | 225348  | 0 | 0 | 0 | 0 | 50 | 38  | 21206920 | 1 | 1 |
| UQCC    | 1308738 | 170  | 50  | 794948  | 204700  | 0 | 0 | 0 | 0 | 50 | 46  | 20035324 | 1 | 1 |
| UQCR11  | 2259505 | 213  | 33  | 148452  | 44856   | 0 | 0 | 0 | 0 | 50 | 56  | 21477124 | 1 | 1 |
| UQCRQ   | 686574  | 200  | 66  | 216804  | 57672   | 0 | 0 | 0 | 0 | 50 | 52  | 16038868 | 1 | 1 |
| URB1    | NaN     | NaN  | NaN | 5751180 | 1692780 | 0 | 0 | 0 | 0 | 0  | 0   | 1692780  | 1 | 1 |
| URM1    | 1928973 | 188  | 64  | 432896  | 128872  | 0 | 0 | 0 | 0 | 50 | 61  | 23763356 | 1 | 1 |
| USP17   | NaN     | NaN  | NaN | 7962652 | 2238884 | 0 | 0 | 0 | 0 | 0  | 0   | 2238884  | 1 | 1 |
| USP27X  | NaN     | NaN  | NaN | 1111788 | 294768  | 0 | 0 | 1 | 0 | 50 | 117 | 39940352 | 1 | 1 |
| USP50   | 325027  | 203  | 27  | 877184  | 221788  | 0 | 0 | 0 | 0 | 50 | 59  | 24680412 | 1 | 1 |
| UTF1    | NaN     | NaN  | NaN | 793168  | 309008  | 0 | 0 | 0 | 0 | 50 | 116 | 39954592 | 1 | 1 |
| UTP15   | 403014  | 289  | 42  | 1349596 | 364544  | 0 | 0 | 0 | 0 | 50 | 67  | 21722052 | 1 | 1 |
| UTS2D   | 112669  | 773  | 9   | 321468  | 80100   | 0 | 0 | 0 | 0 | 50 | 66  | 26969136 | 1 | 1 |
| UXT     | 770573  | NaN  | 45  | 446780  | 121396  | 0 | 0 | 1 | 0 | 4  | 2   | 1344256  | 1 | 1 |
| VAMP1   | 2702142 | 198  | 50  | 335708  | 89356   | 0 | 0 | 0 | 0 | 50 | 83  | 26876220 | 1 | 1 |
| VAMP7   | NaN     | NaN  | NaN | 781420  | 157352  | 0 | 0 | 1 | 0 | 50 | 117 | 39802936 | 1 | 1 |
| VASH2   | 315884  | 412  | 12  | 914920  | 251336  | 0 | 0 | 0 | 0 | 49 | 65  | 24874788 | 1 | 1 |

|         |         |     |     |         |         |   |   |   |   |    |     |          |   |   |
|---------|---------|-----|-----|---------|---------|---|---|---|---|----|-----|----------|---|---|
| VAX1    | 202295  | 640 | -14 | 918124  | 311144  | 0 | 0 | 1 | 0 | 31 | 34  | 13339676 | 1 | 1 |
| VBP1    | 371405  | NaN | -13 | 532220  | 125668  | 0 | 0 | 0 | 0 | 50 | 60  | 21240384 | 1 | 1 |
| VCX     | 43100   | NaN | -9  | 526524  | 140976  | 0 | 0 | 0 | 0 | 50 | 96  | 29130412 | 1 | 1 |
| VCY     | NaN     | NaN | NaN | 632968  | 195800  | 0 | 0 | 0 | 0 | 50 | 116 | 39841384 | 1 | 1 |
| VCY1B   | NaN     | NaN | NaN | 632968  | 195800  | 0 | 0 | 0 | 0 | 50 | 116 | 39841384 | 1 | 1 |
| VDAC3   | 535273  | 459 | 37  | 751516  | 195800  | 0 | 0 | 0 | 0 | 50 | 58  | 21295208 | 1 | 1 |
| VENTX   | 339279  | 452 | -12 | 629052  | 211464  | 0 | 0 | 2 | 0 | 2  | 2   | 954436   | 1 | 1 |
| VGLL1   | 358658  | NaN | 43  | 655040  | 191884  | 0 | 0 | 0 | 0 | 50 | 60  | 22953100 | 1 | 1 |
| VIPAR   | 527850  | 359 | 49  | 1323964 | 337844  | 0 | 0 | 0 | 0 | 32 | 44  | 15803552 | 1 | 1 |
| VMAC    | 1166723 | 392 | 36  | 406552  | 144536  | 0 | 0 | 0 | 0 | 50 | 67  | 17965184 | 1 | 1 |
| VN1R5   | 352232  | 742 | -15 | 891068  | 254896  | 0 | 0 | 0 | 0 | 50 | 50  | 15613092 | 1 | 1 |
| VOPPI   | 947740  | 541 | 23  | 445356  | 126024  | 0 | 0 | 0 | 0 | 50 | 74  | 21057044 | 1 | 1 |
| VPREB3  | 610486  | 266 | 30  | 310432  | 93272   | 0 | 0 | 0 | 0 | 50 | 71  | 20499548 | 1 | 1 |
| VPS24   | 617233  | 424 | 18  | 595232  | 140620  | 0 | 0 | 0 | 0 | 50 | 62  | 23532668 | 1 | 1 |
| VPS25   | 1633092 | 190 | 33  | 474904  | 115700  | 0 | 0 | 0 | 0 | 24 | 22  | 8134244  | 1 | 1 |
| VSIG10L | NaN     | NaN | NaN | 2079040 | 740480  | 0 | 0 | 0 | 0 | 7  | 14  | 4428640  | 1 | 1 |
| VSTM2B  | NaN     | NaN | NaN | 695268  | 238164  | 0 | 0 | 0 | 0 | 50 | 116 | 39883748 | 1 | 1 |
| VWA5B1  | NaN     | NaN | NaN | 3069788 | 915988  | 0 | 0 | 0 | 0 | 5  | 8   | 3288016  | 1 | 1 |
| VWA5B2  | NaN     | NaN | NaN | 3023864 | 1035604 | 0 | 0 | 0 | 0 | 0  | 0   | 1035604  | 1 | 1 |
| VWDE    | NaN     | NaN | NaN | 4165200 | 1051980 | 0 | 0 | 0 | 0 | 0  | 0   | 1051980  | 1 | 1 |
| WASH1   | 332463  | 398 | NaN | 1185480 | 350304  | 0 | 0 | 0 | 0 | 29 | 40  | 14411236 | 1 | 1 |
| WBSCR28 | 1099366 | 208 | 37  | 649700  | 215380  | 0 | 0 | 2 | 0 | 12 | 12  | 3580292  | 1 | 1 |
| WDFY2   | 246186  | 384 | 46  | 1062304 | 269492  | 0 | 0 | 1 | 0 | 50 | 55  | 20167756 | 1 | 1 |
| WDFY4   | NaN     | NaN | NaN | 8122140 | 2343192 | 0 | 0 | 0 | 0 | 0  | 0   | 2343192  | 1 | 1 |
| WDR16   | 79661   | 336 | -24 | 1611256 | 436100  | 0 | 0 | 0 | 0 | 8  | 9   | 2543620  | 1 | 1 |
| WDR45L  | 1250099 | 217 | 26  | 908156  | 235672  | 0 | 0 | 0 | 0 | 50 | 67  | 21838464 | 1 | 1 |
| WDR52   | 440896  | 672 | 24  | 4892508 | 1210044 | 0 | 0 | 0 | 0 | 0  | 0   | 1210044  | 1 | 1 |
| WDR5B   | 416095  | 478 | 34  | 826632  | 233892  | 0 | 0 | 0 | 0 | 50 | 33  | 16216156 | 1 | 1 |
| WDR65   | 1068006 | 294 | 30  | 1788544 | 496976  | 0 | 0 | 0 | 0 | 32 | 32  | 15081584 | 1 | 1 |
| WDR67   | 482518  | 203 | 27  | 2811688 | 698828  | 0 | 0 | 0 | 0 | 2  | 0   | 819512   | 1 | 1 |
| WDR69   | 161693  | 425 | 4   | 1103956 | 282308  | 0 | 0 | 0 | 0 | 50 | 36  | 17719900 | 1 | 1 |
| WDR8    | 250027  | 288 | 16  | 1191888 | 332148  | 0 | 0 | 0 | 0 | 36 | 30  | 13749432 | 1 | 1 |
| WDR85   | 1315685 | 404 | 41  | 1160204 | 325384  | 0 | 0 | 0 | 0 | 0  | 0   | 325384   | 1 | 1 |



|         |         |     |     |         |         |   |   |   |   |    |     |          |   |   |
|---------|---------|-----|-----|---------|---------|---|---|---|---|----|-----|----------|---|---|
| WDR86   | 608657  | 190 | 39  | 929160  | 300108  | 0 | 0 | 0 | 0 | 50 | 44  | 20451132 | 1 | 1 |
| WDR87   | NaN     | NaN | NaN | 7284828 | 1946964 | 0 | 0 | 0 | 0 | 0  | 0   | 1946964  | 1 | 1 |
| WDR89   | 320174  | 221 | 27  | 982560  | 264864  | 0 | 0 | 0 | 0 | 50 | 71  | 27035352 | 1 | 1 |
| WDR92   | 190719  | 594 | 5   | 933076  | 245996  | 0 | 0 | 0 | 0 | 50 | 43  | 17972304 | 1 | 1 |
| WDYHV1  | 544059  | 225 | 35  | 552156  | 129228  | 0 | 0 | 0 | 0 | 50 | 54  | 19128592 | 1 | 1 |
| WFDC1   | 585154  | 396 | 8   | 563548  | 170168  | 0 | 0 | 0 | 0 | 50 | 58  | 22662604 | 1 | 1 |
| WFDC10A | NaN     | NaN | NaN | 206124  | 56604   | 0 | 0 | 0 | 0 | 50 | 116 | 39702188 | 1 | 1 |
| WFDC10B | 777303  | 359 | 16  | 411536  | 82948   | 0 | 0 | 0 | 0 | 50 | 71  | 19735928 | 1 | 1 |
| WFDC11  | 736165  | 438 | 18  | 244928  | 49840   | 0 | 0 | 0 | 0 | 50 | 60  | 20623436 | 1 | 1 |
| WFDC5   | 865186  | 324 | 46  | 325384  | 86864   | 0 | 0 | 0 | 0 | 50 | 92  | 27552620 | 1 | 1 |
| WFDC6   | 1069725 | 438 | 36  | 233180  | 56248   | 0 | 0 | 0 | 0 | 50 | 84  | 21025004 | 1 | 1 |
| WFDC9   | 736165  | 438 | 18  | 245640  | 55536   | 0 | 0 | 0 | 0 | 50 | 60  | 20623436 | 1 | 1 |
| WFIKKN1 | 1115707 | 213 | 39  | 1335000 | 430404  | 0 | 0 | 1 | 0 | 39 | 42  | 13074456 | 1 | 1 |
| WHSC2   | 747944  | 321 | 38  | 1351732 | 421148  | 0 | 0 | 0 | 0 | 2  | 3   | 2275196  | 1 | 1 |
| WNT1    | 1737773 | 214 | 55  | 907088  | 294412  | 0 | 0 | 1 | 0 | 50 | 50  | 18572876 | 1 | 1 |
| WNT10A  | 1087669 | 386 | 42  | 1030264 | 321824  | 0 | 0 | 2 | 0 | 50 | 74  | 18604204 | 1 | 1 |
| WNT8A   | 1044706 | 377 | 41  | 917056  | 234248  | 0 | 0 | 1 | 0 | 50 | 71  | 18121112 | 1 | 1 |
| WNT8B   | 1153157 | 264 | 50  | 887508  | 261660  | 0 | 0 | 0 | 0 | 50 | 61  | 20699264 | 1 | 1 |
| XAGE1A  | NaN     | NaN | NaN | 1304740 | 169100  | 0 | 0 | 0 | 0 | 50 | 116 | 39814684 | 1 | 1 |
| XAGE1B  | NaN     | NaN | NaN | 1304740 | 169100  | 0 | 0 | 0 | 0 | 50 | 116 | 39814684 | 1 | 1 |
| XAGE1C  | NaN     | NaN | NaN | 1304740 | 169100  | 0 | 0 | 0 | 0 | 50 | 116 | 39814684 | 1 | 1 |
| XAGE1D  | NaN     | NaN | NaN | 1304740 | 169100  | 0 | 0 | 0 | 0 | 50 | 116 | 39814684 | 1 | 1 |
| XAGE1E  | NaN     | NaN | NaN | 1304740 | 169100  | 0 | 0 | 0 | 0 | 50 | 116 | 39814684 | 1 | 1 |
| XAGE2B  | NaN     | NaN | NaN | 583840  | 143468  | 0 | 0 | 0 | 0 | 50 | 116 | 39789052 | 1 | 1 |
| XCL1    | 389559  | 440 | 15  | 290496  | 88644   | 0 | 0 | 0 | 0 | 50 | 53  | 17696404 | 1 | 1 |
| XCL2    | 389559  | 440 | 15  | 290140  | 89000   | 0 | 0 | 0 | 0 | 50 | 53  | 17696404 | 1 | 1 |
| XCR1    | 225584  | 551 | 54  | 816308  | 258100  | 0 | 0 | 1 | 0 | 50 | 52  | 16537980 | 1 | 1 |
| XKRY    | NaN     | NaN | NaN | 588824  | 167320  | 0 | 0 | 0 | 0 | 50 | 116 | 39812904 | 1 | 1 |
| XKRY2   | NaN     | NaN | NaN | 588824  | 167320  | 0 | 0 | 0 | 0 | 50 | 116 | 39812904 | 1 | 1 |
| YBX2    | 1782958 | 316 | 21  | 897476  | 308296  | 0 | 0 | 0 | 0 | 39 | 39  | 14081580 | 1 | 1 |
| YDJC    | 521773  | 194 | 37  | 780352  | 276968  | 0 | 0 | 0 | 0 | 12 | 11  | 5081544  | 1 | 1 |
| YPEL1   | 447011  | 252 | 56  | 320756  | 76540   | 0 | 0 | 1 | 0 | 8  | 9   | 3332160  | 1 | 1 |
| YPEL2   | 1000345 | 452 | 16  | 318620  | 78676   | 0 | 0 | 0 | 0 | 50 | 57  | 16009320 | 1 | 1 |

|          |         |      |     |         |         |   |   |   |   |    |     |          |   |   |
|----------|---------|------|-----|---------|---------|---|---|---|---|----|-----|----------|---|---|
| YPEL3    | 2261614 | 201  | 56  | 405840  | 113208  | 0 | 0 | 0 | 0 | 50 | 76  | 22107600 | 1 | 1 |
| YSK4     | 297611  | 434  | 28  | 3421160 | 877540  | 0 | 0 | 0 | 0 | 11 | 5   | 3532944  | 1 | 1 |
| ZAK      | 219235  | 429  | 16  | 2447856 | 608760  | 0 | 0 | 0 | 0 | 5  | 6   | 2331088  | 1 | 1 |
| ZAR1L    | NaN     | NaN  | NaN | 815952  | 230688  | 0 | 0 | 0 | 0 | 50 | 116 | 39876272 | 1 | 1 |
| ZBED3    | NaN     | NaN  | NaN | 553224  | 203988  | 0 | 0 | 0 | 0 | 50 | 116 | 39849572 | 1 | 1 |
| ZBED5    | NaN     | NaN  | NaN | 1740484 | 483092  | 0 | 0 | 0 | 0 | 50 | 116 | 40128676 | 1 | 1 |
| ZBED6    | NaN     | NaN  | NaN | 2470996 | 666788  | 0 | 0 | 0 | 0 | 7  | 14  | 4354948  | 1 | 1 |
| ZBTB42   | NaN     | NaN  | NaN | 1018160 | 341404  | 0 | 0 | 0 | 0 | 50 | 116 | 39986988 | 1 | 1 |
| ZBTB8B   | NaN     | NaN  | NaN | 1251340 | 350660  | 0 | 0 | 0 | 0 | 50 | 116 | 39996244 | 1 | 1 |
| ZC3H8    | 591586  | 348  | 29  | 798152  | 171592  | 0 | 0 | 1 | 0 | 50 | 51  | 21061672 | 1 | 1 |
| ZC3HAV1I | 553735  | 243  | 29  | 760416  | 223212  | 0 | 0 | 0 | 0 | 50 | 84  | 23437972 | 1 | 1 |
| ZCCHC10  | 654533  | 223  | 38  | 449628  | 113208  | 0 | 0 | 1 | 0 | 11 | 18  | 5207924  | 1 | 1 |
| ZCCHC17  | 675993  | 215  | 30  | 651124  | 154148  | 0 | 0 | 1 | 0 | 50 | 52  | 16586396 | 1 | 1 |
| ZCRB1    | 174511  | 545  | 18  | 594876  | 133500  | 0 | 0 | 0 | 0 | 50 | 51  | 19585696 | 1 | 1 |
| ZDHHC12  | 1865107 | 197  | 38  | 662160  | 215736  | 0 | 0 | 1 | 0 | 50 | 70  | 23922844 | 1 | 1 |
| ZDHHC24  | 1343990 | 194  | 62  | 669992  | 251692  | 0 | 0 | 1 | 0 | 50 | 53  | 20002216 | 1 | 1 |
| ZFP106   | 570116  | 284  | 37  | 4789980 | 1323252 | 0 | 0 | 0 | 0 | 0  | 0   | 1323252  | 1 | 1 |
| ZFP112   | 705123  | 671  | -38 | 2387692 | 557852  | 0 | 0 | 0 | 0 | 0  | 0   | 557852   | 1 | 1 |
| ZFP161   | 52395   | 1017 | -6  | 1158424 | 291920  | 0 | 0 | 0 | 0 | 33 | 38  | 12798912 | 1 | 1 |
| ZFP62    | NaN     | NaN  | NaN | 2321120 | 573160  | 0 | 0 | 0 | 0 | 9  | 16  | 4930600  | 1 | 1 |
| ZFP92    | NaN     | NaN  | NaN | 1036672 | 311144  | 0 | 0 | 1 | 0 | 50 | 117 | 39956728 | 1 | 1 |
| ZFYVE20  | 564079  | 395  | 44  | 2008552 | 549308  | 0 | 0 | 0 | 0 | 25 | 31  | 12087980 | 1 | 1 |
| ZG16     | NaN     | NaN  | NaN | 425420  | 127804  | 0 | 0 | 0 | 0 | 50 | 116 | 39773388 | 1 | 1 |
| ZMAT5    | 848649  | 195  | 37  | 450340  | 118904  | 0 | 0 | 0 | 0 | 50 | 54  | 19150308 | 1 | 1 |
| ZMYND10  | 843769  | 206  | 51  | 1142404 | 317552  | 0 | 0 | 2 | 0 | 50 | 68  | 20472848 | 1 | 1 |
| ZMYND17  | 847821  | 249  | 45  | 1153084 | 349592  | 0 | 0 | 0 | 0 | 50 | 67  | 24394188 | 1 | 1 |
| ZNF167   | 419284  | 467  | 45  | 1949456 | 510148  | 0 | 0 | 0 | 0 | 3  | 4   | 1774304  | 1 | 1 |
| ZNF169   | 219475  | 445  | 31  | 1524748 | 427556  | 0 | 0 | 1 | 0 | 50 | 67  | 27019332 | 1 | 1 |
| ZNF177   | 401242  | 705  | -65 | 1259172 | 306516  | 0 | 0 | 0 | 0 | 8  | 13  | 3433976  | 1 | 1 |
| ZNF187   | 273319  | 502  | 35  | 1244932 | 304736  | 0 | 0 | 0 | 0 | 27 | 25  | 8631220  | 1 | 1 |
| ZNF192   | 202009  | 514  | 34  | 1480248 | 396228  | 0 | 0 | 0 | 0 | 8  | 11  | 4628000  | 1 | 1 |
| ZNF193   | 237664  | 486  | 34  | 1018160 | 260236  | 0 | 0 | 0 | 0 | 5  | 9   | 1798512  | 1 | 1 |
| ZNF2     | 223452  | 616  | 24  | 1094700 | 290496  | 0 | 0 | 1 | 0 | 48 | 53  | 21341844 | 1 | 1 |

|          |         |     |     |         |         |   |   |   |   |    |     |          |   |   |
|----------|---------|-----|-----|---------|---------|---|---|---|---|----|-----|----------|---|---|
| ZNF22    | 79469   | 905 | 15  | 583840  | 141332  | 0 | 0 | 1 | 0 | 50 | 68  | 20748036 | 1 | 1 |
| ZNF238   | 220918  | 795 | -11 | 1345680 | 363120  | 0 | 0 | 0 | 0 | 3  | 3   | 1262732  | 1 | 1 |
| ZNF259   | 419339  | 326 | 36  | 1208620 | 322892  | 0 | 0 | 0 | 0 | 50 | 47  | 21154588 | 1 | 1 |
| ZNF268   | 334913  | 834 | 6   | 517268  | 111784  | 0 | 0 | 1 | 0 | 50 | 71  | 19917132 | 1 | 1 |
| ZNF295   | 241619  | 430 | 84  | 2671780 | 751160  | 0 | 0 | 0 | 0 | 3  | 3   | 1683524  | 1 | 1 |
| ZNF321   | 425659  | 984 | -56 | 430048  | 102884  | 0 | 0 | 0 | 0 | 50 | 49  | 18465008 | 1 | 1 |
| ZNF322A  | 397964  | 619 | 14  | 1047352 | 243860  | 0 | 0 | 0 | 0 | 50 | 54  | 21261744 | 1 | 1 |
| ZNF322B  | 308580  | 548 | 17  | 1046284 | 244928  | 0 | 0 | 0 | 0 | 50 | 55  | 26358596 | 1 | 1 |
| ZNF323   | 273498  | 502 | 33  | 1053760 | 267356  | 0 | 0 | 0 | 0 | 35 | 30  | 12904644 | 1 | 1 |
| ZNF389   | NaN     | NaN | NaN | 703100  | 166252  | 0 | 0 | 0 | 0 | 50 | 116 | 39811836 | 1 | 1 |
| ZNF397OS | 260556  | 599 | 7   | 1297976 | 320044  | 0 | 0 | 0 | 0 | 50 | 41  | 21849856 | 1 | 1 |
| ZNF414   | 726124  | 214 | 1   | 974372  | 321112  | 0 | 0 | 1 | 0 | 50 | 67  | 22455056 | 1 | 1 |
| ZNF416   | 459366  | 828 | -31 | 1527596 | 391600  | 0 | 0 | 1 | 0 | 50 | 62  | 16455032 | 1 | 1 |
| ZNF428   | 441738  | 209 | 6   | 552868  | 163760  | 0 | 0 | 0 | 0 | 50 | 64  | 22145336 | 1 | 1 |
| ZNF434   | 1361831 | 303 | 29  | 1247068 | 322892  | 0 | 0 | 0 | 0 | 40 | 53  | 17390600 | 1 | 1 |
| ZNF444   | 500375  | 480 | -61 | 793880  | 269848  | 0 | 0 | 0 | 0 | 0  | 0   | 269848   | 1 | 1 |
| ZNF469   | NaN     | NaN | NaN | 9384516 | 3198660 | 0 | 0 | 0 | 0 | 0  | 0   | 3198660  | 1 | 1 |
| ZNF497   | 1621097 | 406 | -25 | 1226064 | 377004  | 0 | 0 | 3 | 0 | 50 | 63  | 19879752 | 1 | 1 |
| ZNF498   | 1395063 | 430 | 34  | 1378076 | 389464  | 0 | 0 | 0 | 0 | 41 | 52  | 15693904 | 1 | 1 |
| ZNF503   | 173705  | 547 | 13  | 1515492 | 561768  | 0 | 0 | 2 | 0 | 18 | 22  | 8155604  | 1 | 1 |
| ZNF541   | NaN     | NaN | NaN | 3407632 | 1028840 | 0 | 0 | 0 | 0 | 0  | 0   | 1028840  | 1 | 1 |
| ZNF579   | 1094560 | 399 | 4   | 1331440 | 476684  | 0 | 0 | 0 | 0 | 27 | 25  | 7431500  | 1 | 1 |
| ZNF618   | 354541  | 591 | -3  | 2221440 | 598080  | 0 | 0 | 1 | 0 | 12 | 12  | 4555376  | 1 | 1 |
| ZNF621   | 195638  | 546 | 22  | 1118196 | 308652  | 0 | 0 | 0 | 0 | 50 | 48  | 20952736 | 1 | 1 |
| ZNF642   | 701723  | 457 | 31  | 1377720 | 332148  | 0 | 0 | 0 | 0 | 50 | 59  | 24104048 | 1 | 1 |
| ZNF643   | 701723  | 457 | 31  | 1385196 | 346032  | 0 | 0 | 0 | 0 | 50 | 59  | 24104048 | 1 | 1 |
| ZNF673   | 194312  | NaN | 27  | 505520  | 113920  | 0 | 0 | 0 | 0 | 50 | 54  | 18733788 | 1 | 1 |
| ZNF696   | 1657385 | 389 | 19  | 927024  | 283020  | 0 | 0 | 1 | 0 | 50 | 72  | 20208696 | 1 | 1 |
| ZNF705D  | 475312  | 625 | 3   | 796372  | 189392  | 0 | 0 | 0 | 0 | 50 | 62  | 20793248 | 1 | 1 |
| ZNF705G  | NaN     | NaN | NaN | 793168  | 189392  | 0 | 0 | 0 | 0 | 50 | 116 | 39834976 | 1 | 1 |
| ZNF706   | 1084949 | 371 | 46  | 210396  | 49128   | 0 | 0 | 0 | 0 | 50 | 66  | 19910012 | 1 | 1 |
| ZNF717   | NaN     | NaN | NaN | 2373808 | 573872  | 0 | 0 | 0 | 0 | 9  | 16  | 4931312  | 1 | 1 |
| ZNF720   | NaN     | NaN | NaN | 343540  | 80456   | 0 | 0 | 0 | 0 | 50 | 116 | 39726040 | 1 | 1 |

|         |         |     |     |         |        |   |   |   |   |    |     |          |   |   |
|---------|---------|-----|-----|---------|--------|---|---|---|---|----|-----|----------|---|---|
| ZNF740  | 1729009 | 191 | 55  | 516200  | 126736 | 0 | 0 | 1 | 0 | 35 | 36  | 12318668 | 1 | 1 |
| ZNF747  | 2214934 | 142 | 54  | 454968  | 164472 | 0 | 0 | 0 | 0 | 50 | 72  | 21947756 | 1 | 1 |
| ZNF763  | 719617  | 678 | -1  | 1044148 | 243860 | 0 | 0 | 0 | 0 | 50 | 85  | 22511660 | 1 | 1 |
| ZNF771  | NaN     | NaN | NaN | 785692  | 245996 | 0 | 0 | 0 | 0 | 50 | 116 | 39891580 | 1 | 1 |
| ZNF775  | 315538  | 514 | 32  | 1314352 | 417944 | 0 | 0 | 1 | 0 | 50 | 70  | 24657628 | 1 | 1 |
| ZNF787  | 565708  | 480 | -66 | 941264  | 297616 | 0 | 0 | 0 | 0 | 0  | 0   | 297616   | 1 | 1 |
| ZNF79   | 742340  | 209 | 43  | 1287296 | 328588 | 0 | 0 | 1 | 0 | 50 | 64  | 25586076 | 1 | 1 |
| ZNF816A | 425659  | 984 | -56 | 1695628 | 406196 | 0 | 0 | 0 | 0 | 47 | 43  | 17882236 | 1 | 1 |
| ZNF826  | NaN     | NaN | NaN | 450340  | 119972 | 0 | 0 | 0 | 0 | 50 | 116 | 39765556 | 1 | 1 |
| ZNF828  | 612511  | 283 | 46  | 2008908 | 603420 | 0 | 0 | 0 | 0 | 12 | 13  | 5849792  | 1 | 1 |
| ZNF837  | NaN     | NaN | NaN | 1280888 | 427912 | 0 | 0 | 0 | 0 | 50 | 116 | 40073496 | 1 | 1 |
| ZNF843  | NaN     | NaN | NaN | 828056  | 290140 | 0 | 0 | 0 | 0 | 50 | 116 | 39935724 | 1 | 1 |
| ZNF879  | NaN     | NaN | NaN | 1462804 | 361340 | 0 | 0 | 0 | 0 | 50 | 116 | 40006924 | 1 | 1 |
| ZNF883  | 519671  | 575 | -11 | 973660  | 241724 | 0 | 0 | 0 | 0 | 50 | 46  | 17403772 | 1 | 1 |
| ZNRD1   | 1820240 | 496 | 30  | 336776  | 87220  | 0 | 0 | 0 | 0 | 50 | 54  | 18891140 | 1 | 1 |
| ZNRF1   | 731807  | 160 | 27  | 571736  | 175864 | 0 | 0 | 0 | 0 | 50 | 53  | 23106536 | 1 | 1 |
| ZSCAN12 | NaN     | NaN | NaN | 1580996 | 392668 | 0 | 0 | 0 | 0 | 50 | 116 | 40038252 | 1 | 1 |
| ZSCAN16 | 213170  | 562 | 23  | 901748  | 229264 | 0 | 0 | 1 | 0 | 50 | 42  | 19286656 | 1 | 1 |
| ZSCAN23 | NaN     | NaN | NaN | 1000360 | 262016 | 0 | 0 | 1 | 0 | 50 | 117 | 39907600 | 1 | 1 |
| ZSWIM6  | NaN     | NaN | NaN | 3052344 | 899256 | 0 | 0 | 0 | 0 | 5  | 8   | 3271284  | 1 | 1 |
| ZYG11A  | NaN     | NaN | NaN | 1954440 | 536136 | 0 | 0 | 0 | 0 | 9  | 16  | 4893576  | 1 | 1 |

---
