# Supplementary material for: An Epithelial-Mesenchymal Transition (EMT) Preoperative Nomogram for Prediction of Lymph Node Metastasis in Bladder Cancer (BLCA)
Source: Hindawi journal article supplement (doi:10.1155/2020/8833972), 2020-11-03

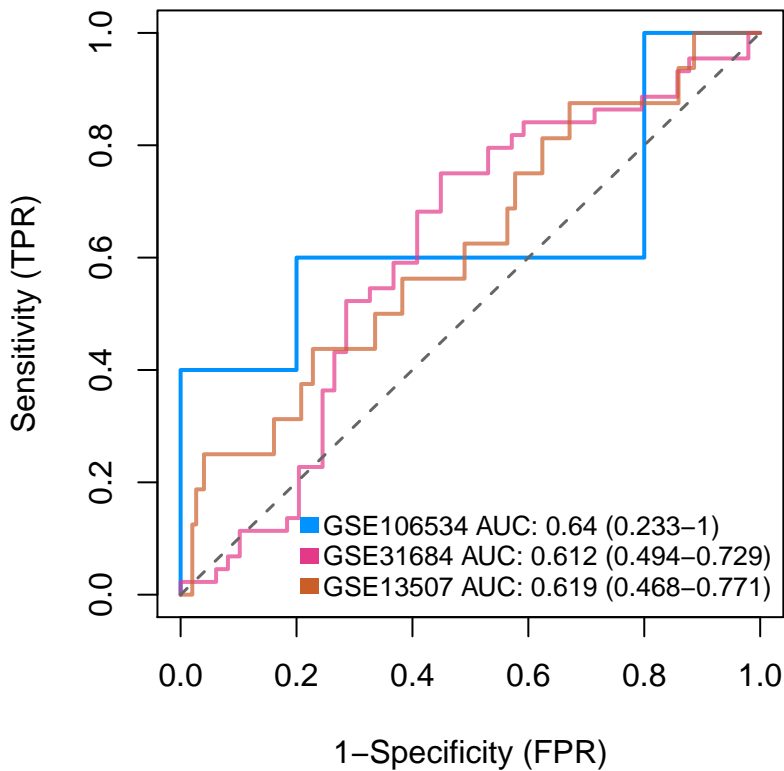

Supplement: f8 [file 8833972.f8.pdf]
