# Supplementary material for: An Epithelial-Mesenchymal Transition (EMT) Preoperative Nomogram for Prediction of Lymph Node Metastasis in Bladder Cancer (BLCA)
Source: Hindawi journal article supplement (doi:10.1155/2020/8833972), 2020-11-03

# TCGA

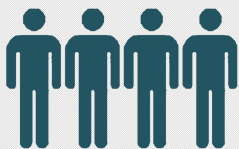

Patients without LN metastasis

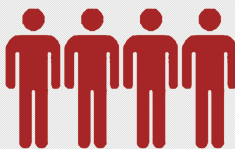

Patients with LN metastasis

## Differentially expressed genes between LN+ and LN-

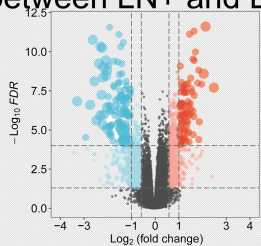

## Gene set enrichment analysis between LN+ and LN-

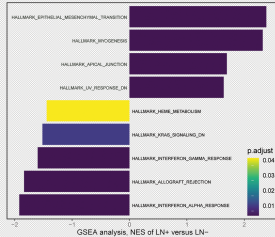

## single sample GSEA between LN+ and LN-

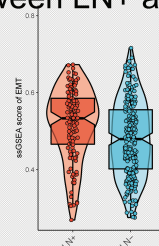

## Supervised cluster and EMTLN signature validation

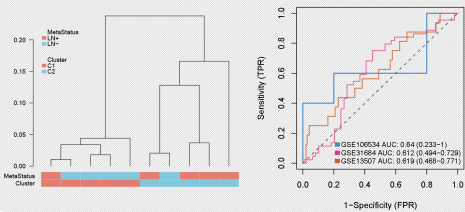

## EMTLN relevant feature selection and EMTLN signature building

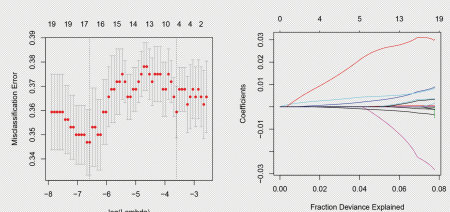

## Significantly mutated genes between LN+ and LN-

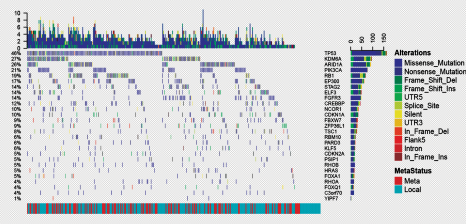

## Model performance and clinical usefulness of the EMTLN -nomogram

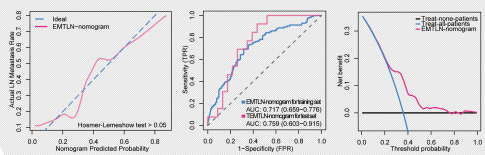

## Logistic regression analysis and nomogram construction

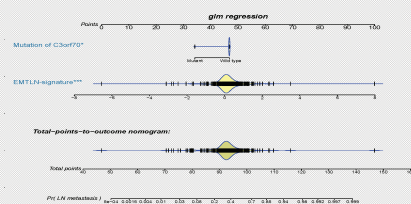

Supplement: f9 [file 8833972.f9.pdf]
